# Supplementary material for: An experimental approach in revisiting the magnetic orientation of cattle
Source: PubMed Central journal article supplement (PMC5894954; doi:10.1371/journal.pone.0187848), 2018-04-11

# bootstrap 1

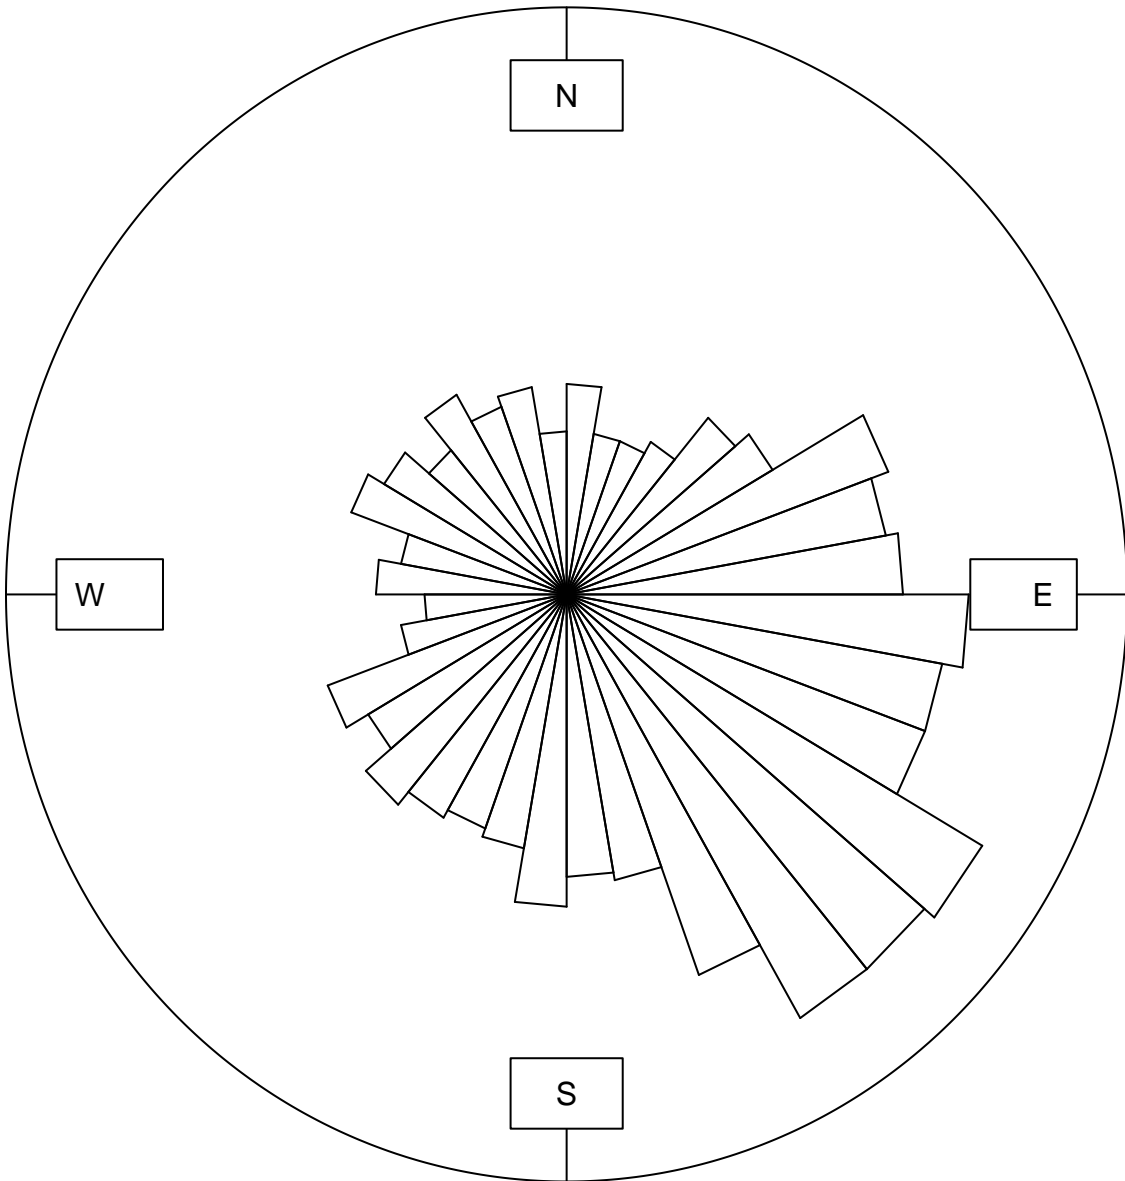

# bootstrap 2

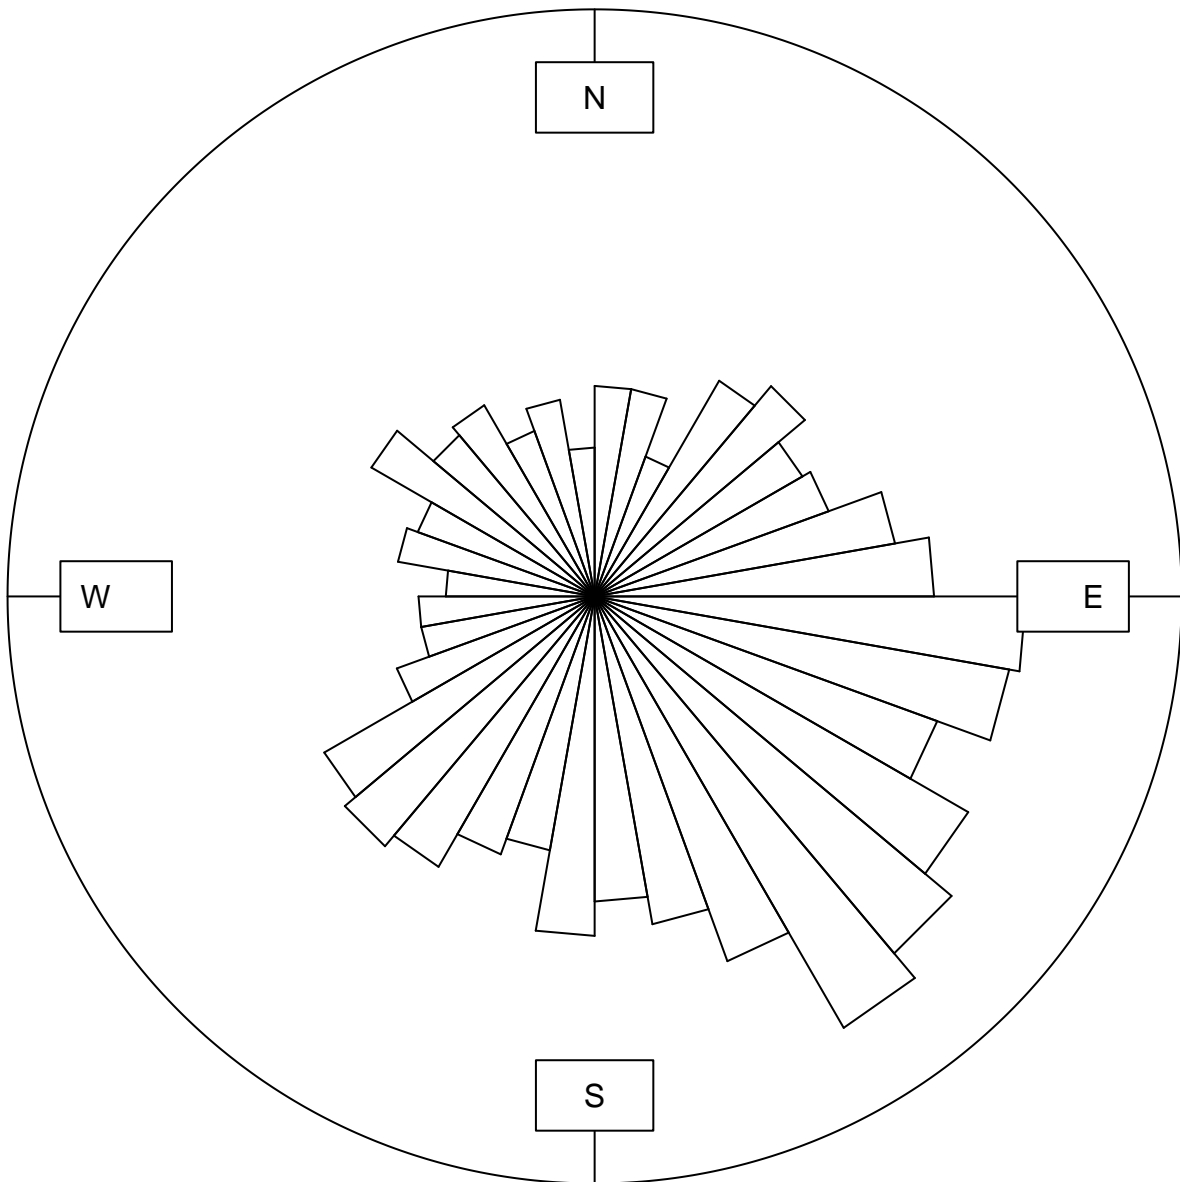

# bootstrap 3

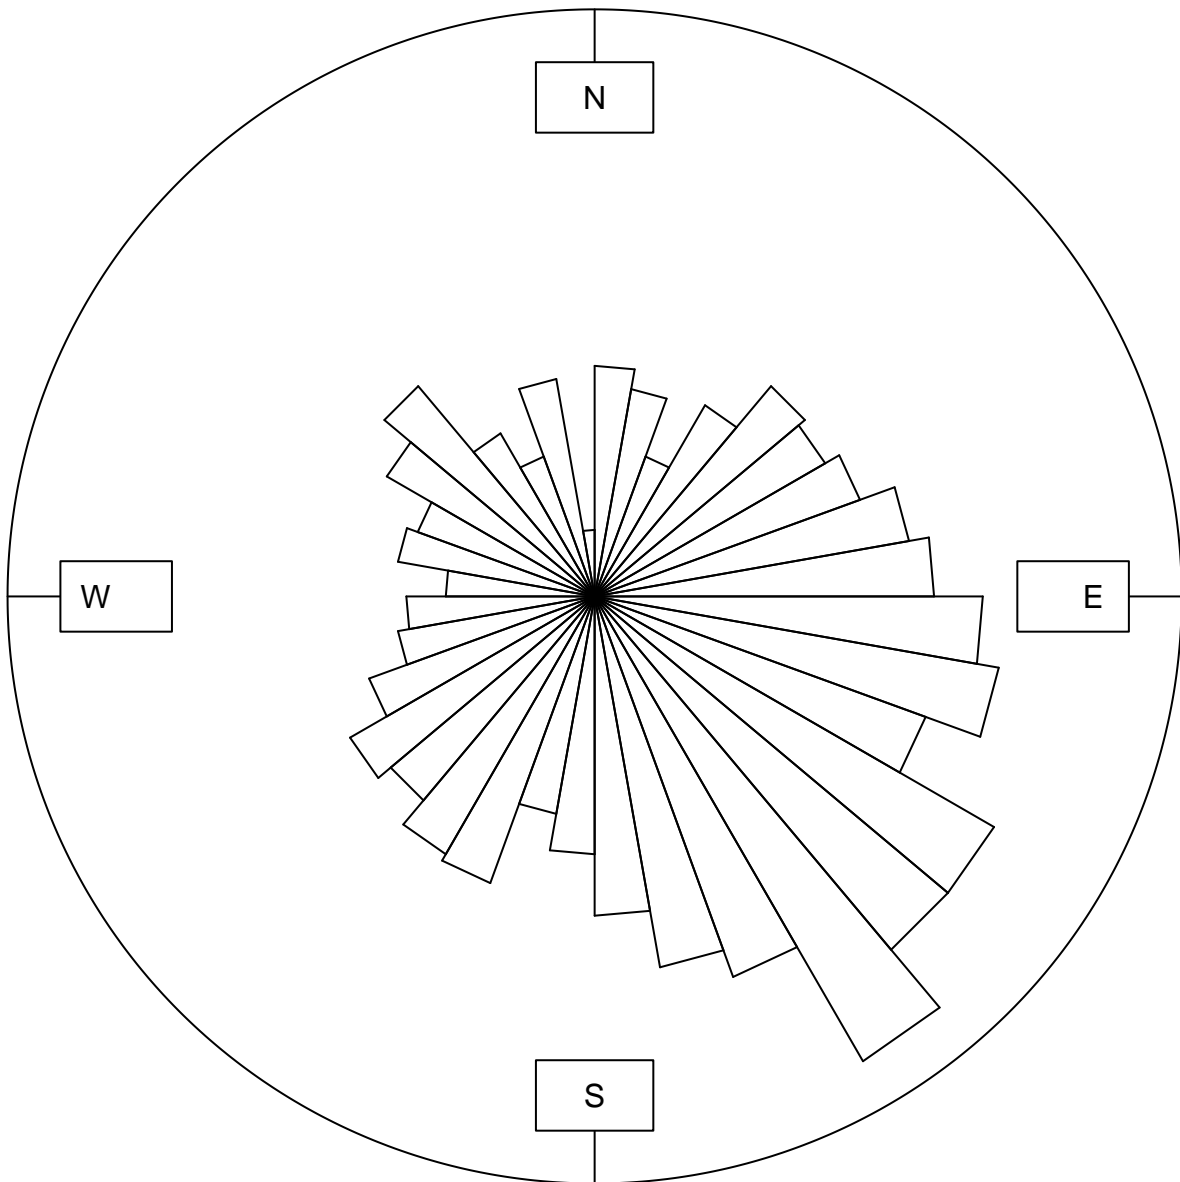

# bootstrap 4

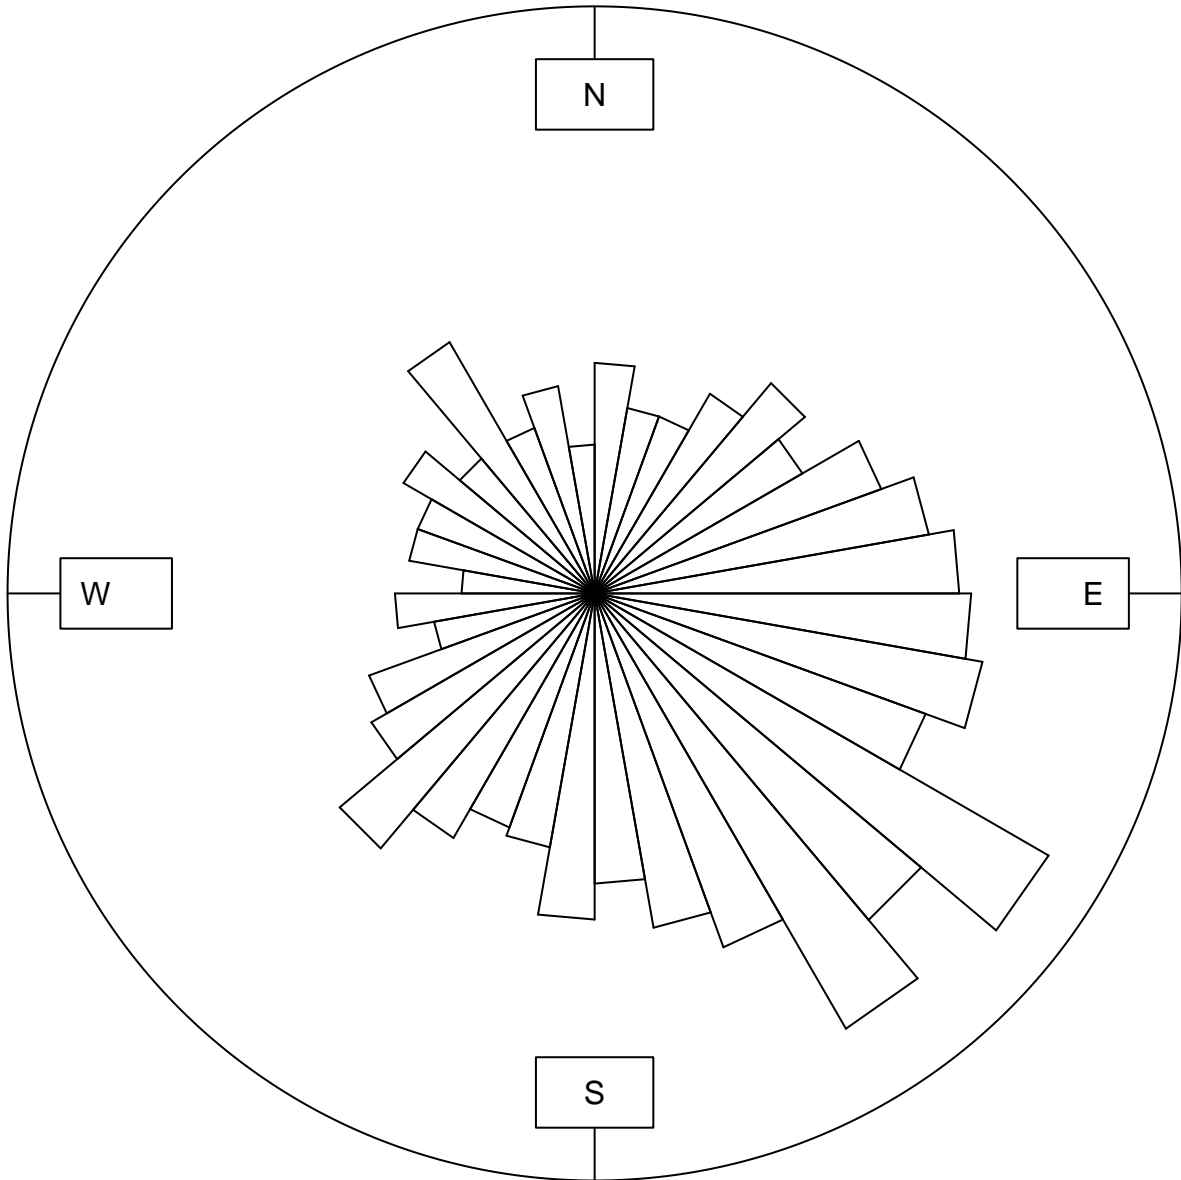

# bootstrap 5

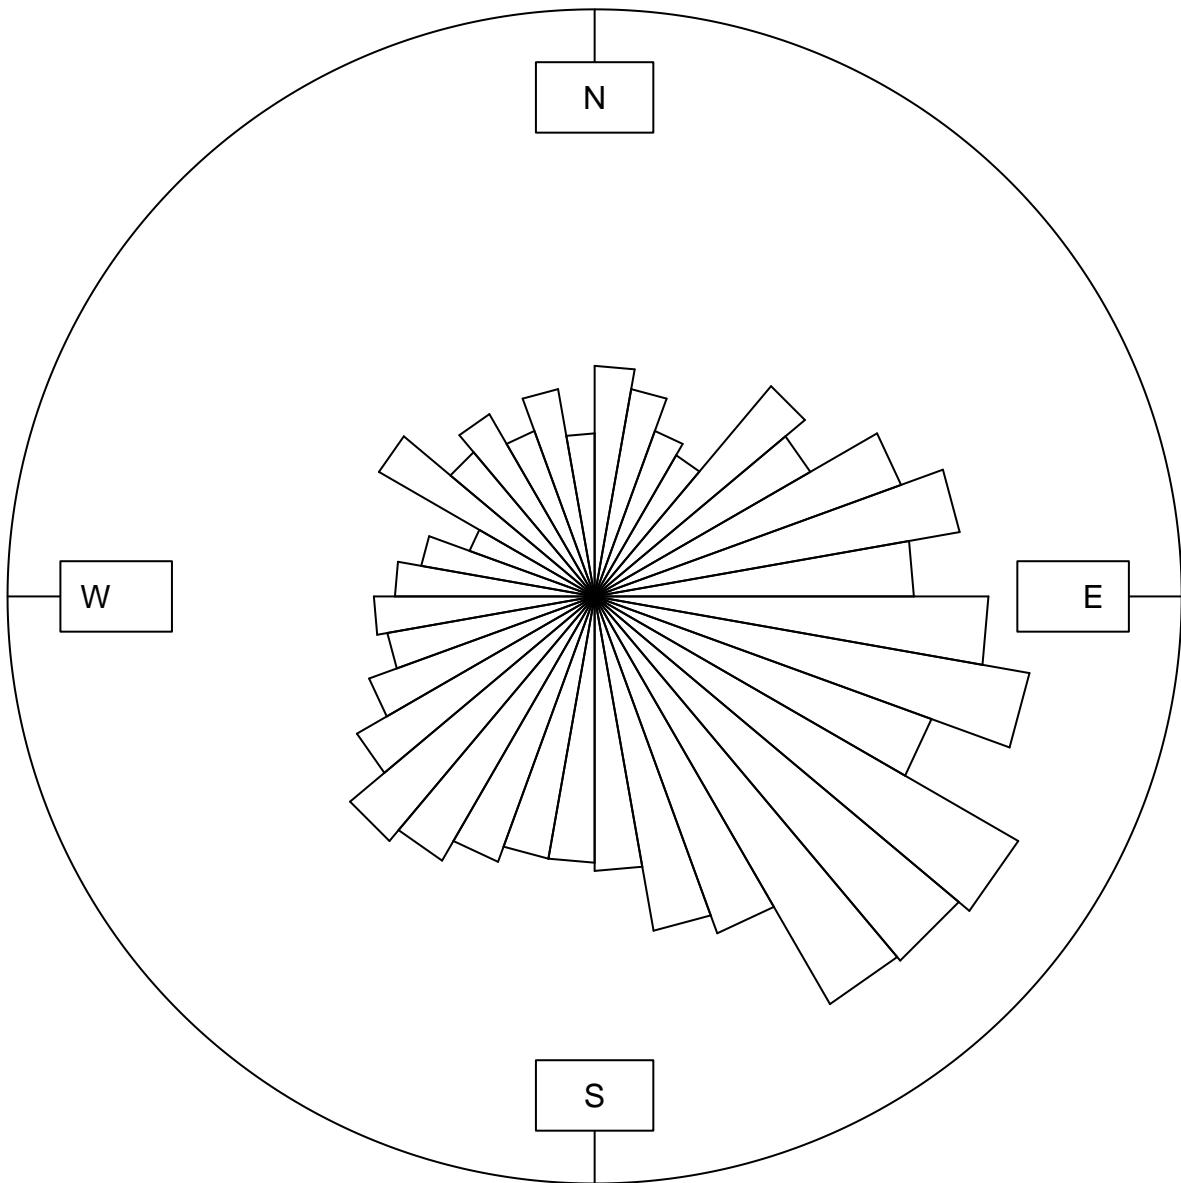

# bootstrap 6

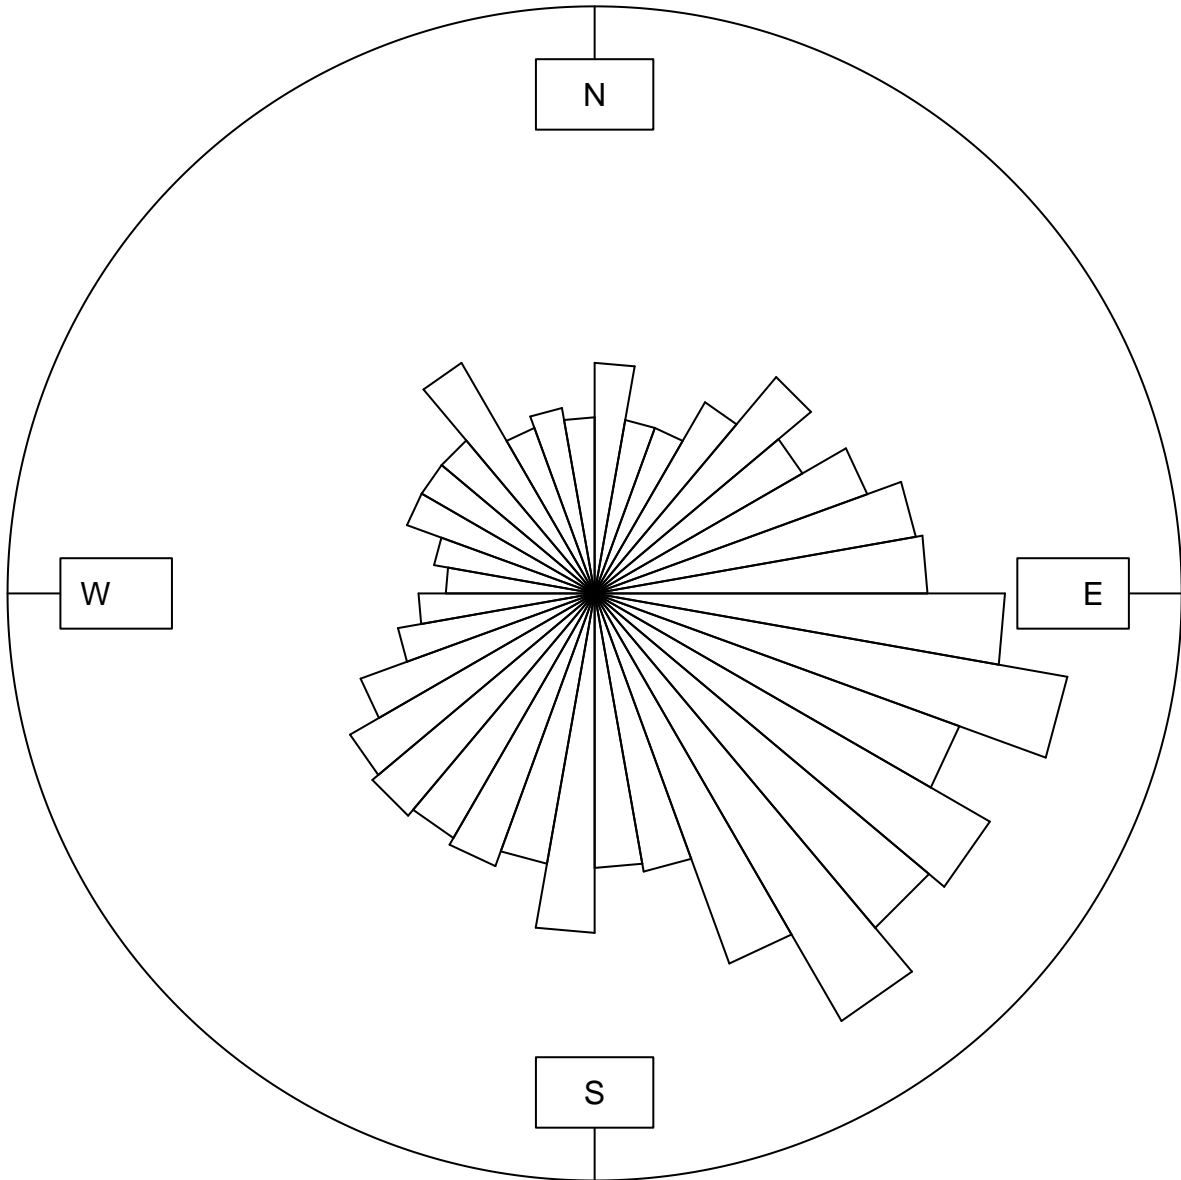

# bootstrap 7

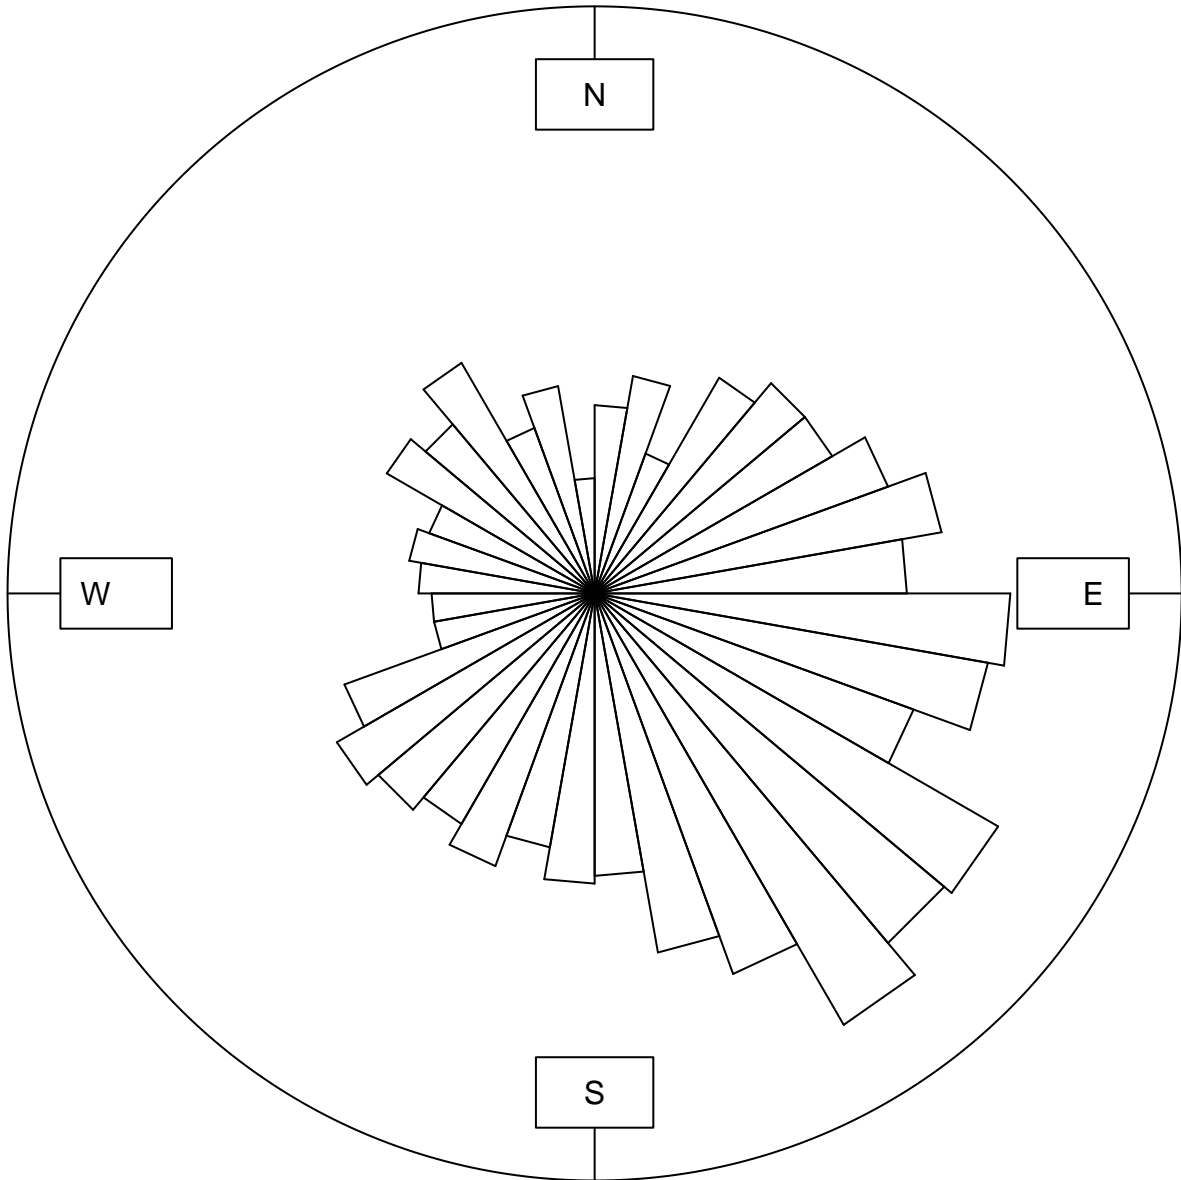

# bootstrap 8

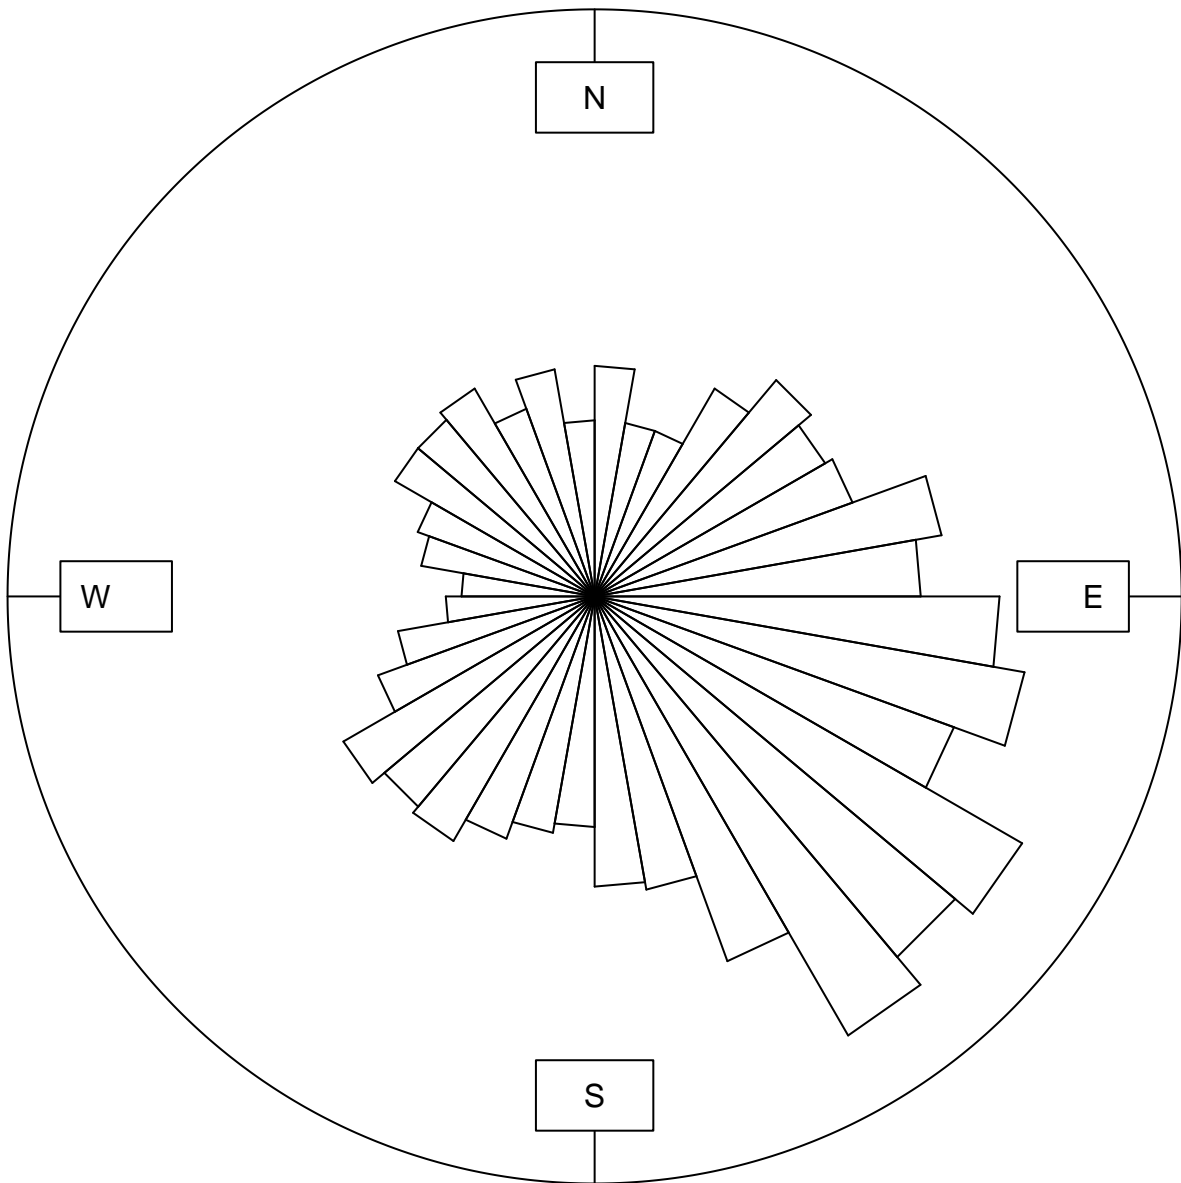



# bootstrap 9

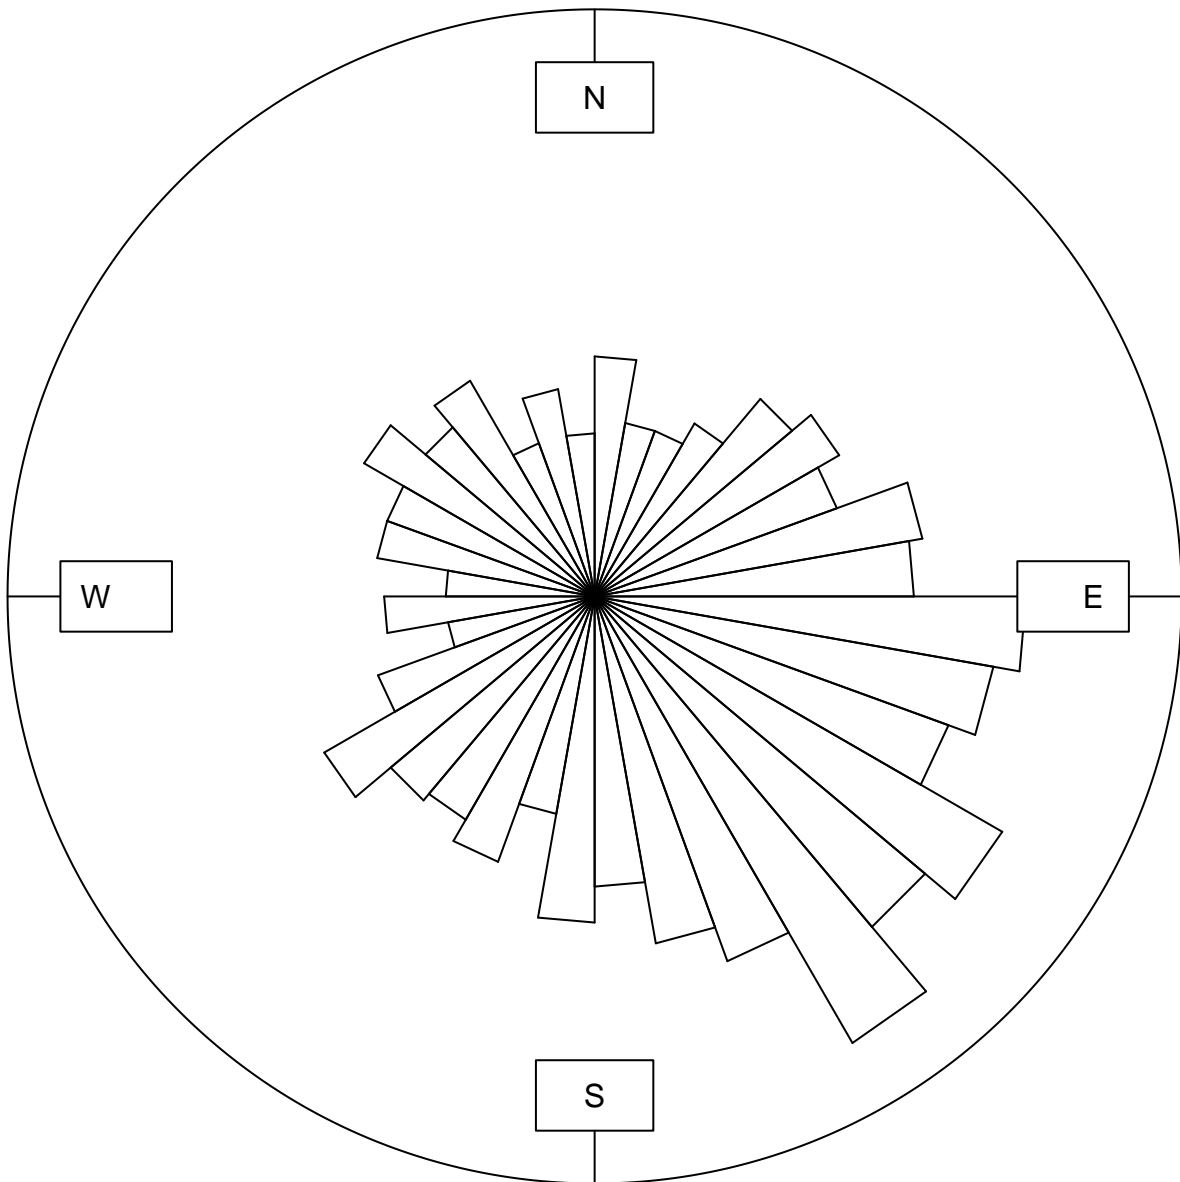

# bootstrap 10

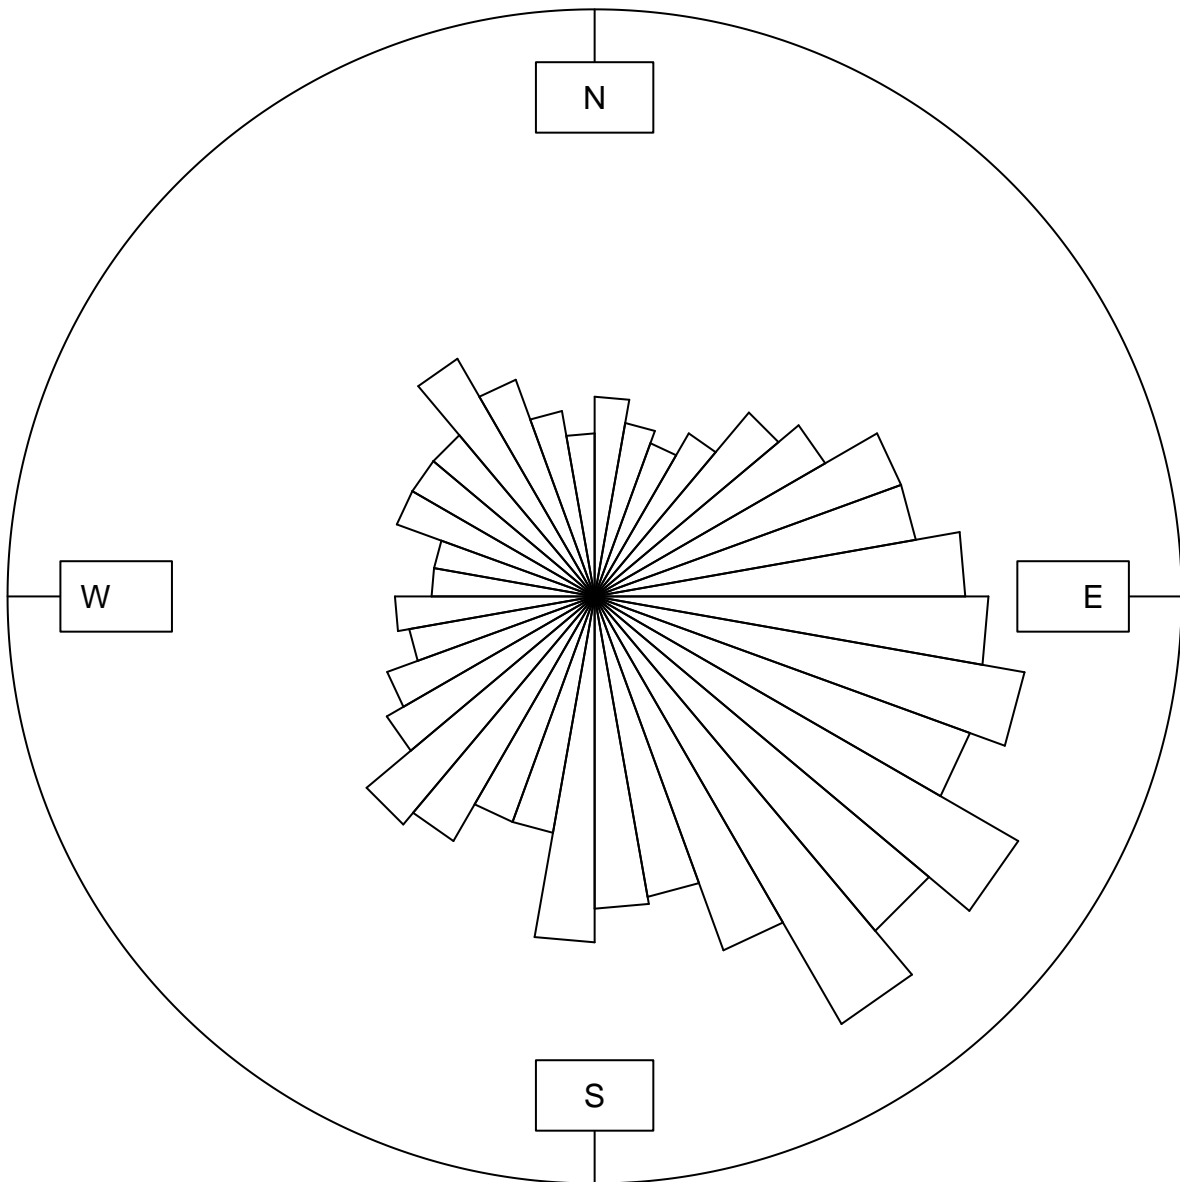

# bootstrap 11

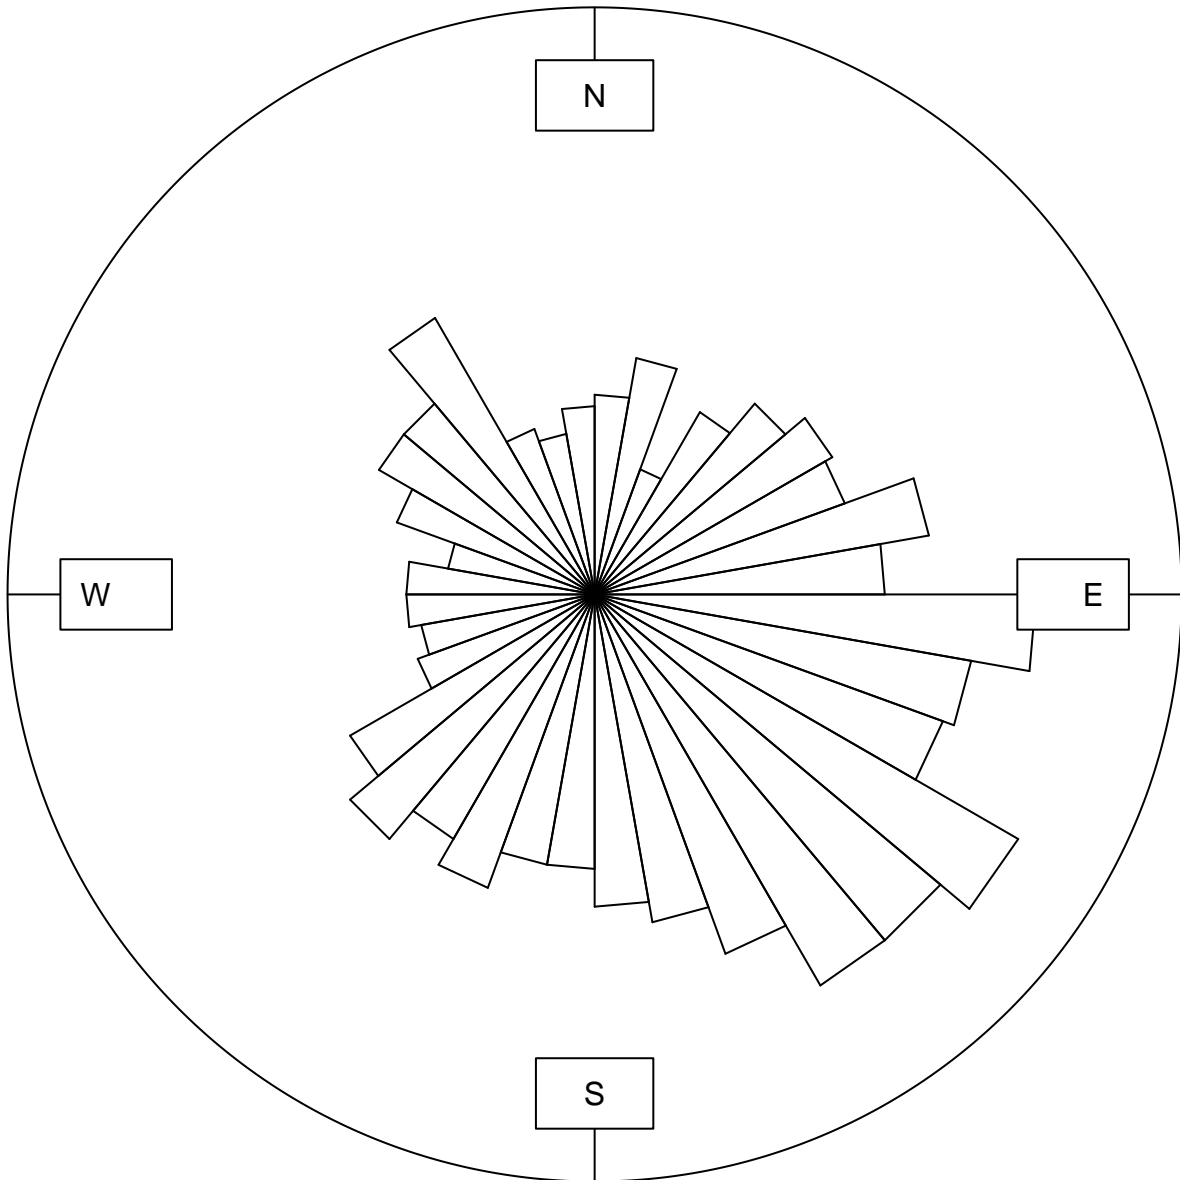

# bootstrap 12

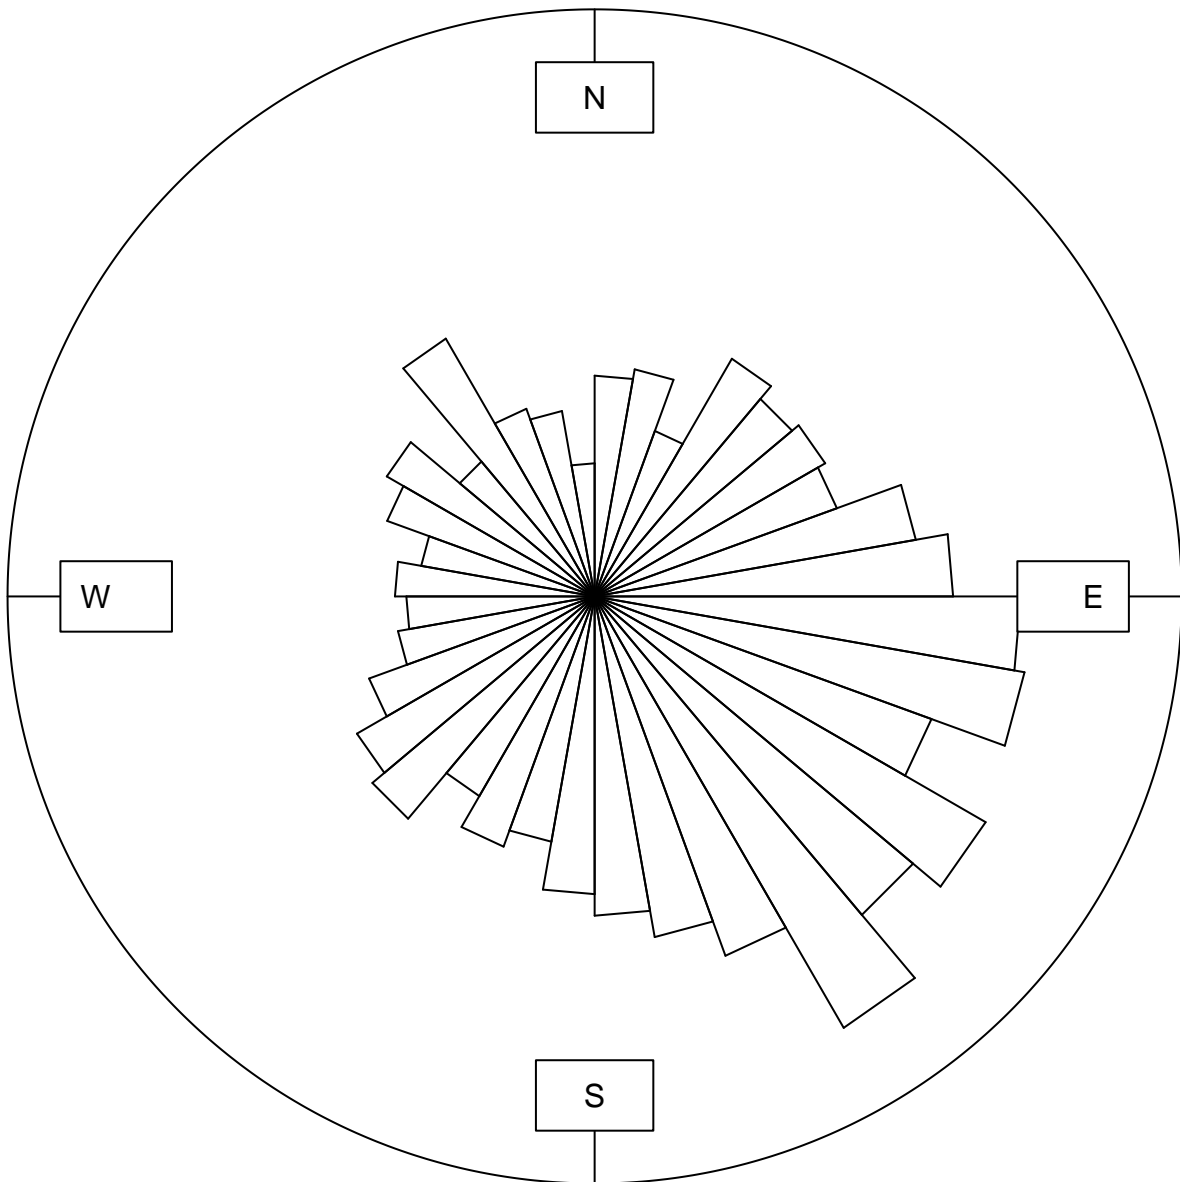

# bootstrap 13

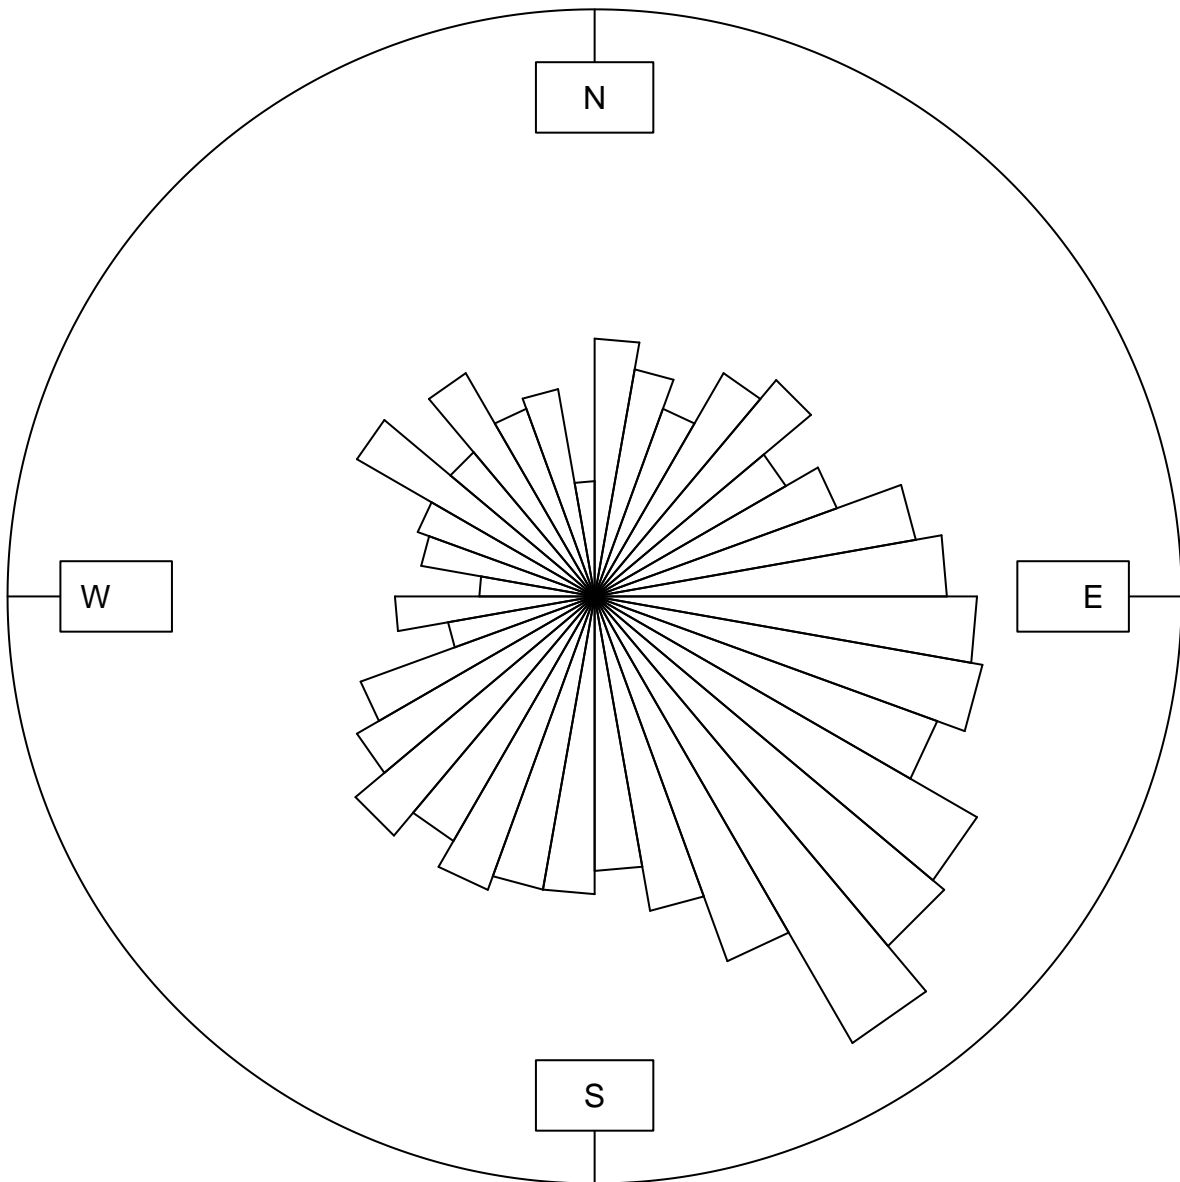

# bootstrap 14

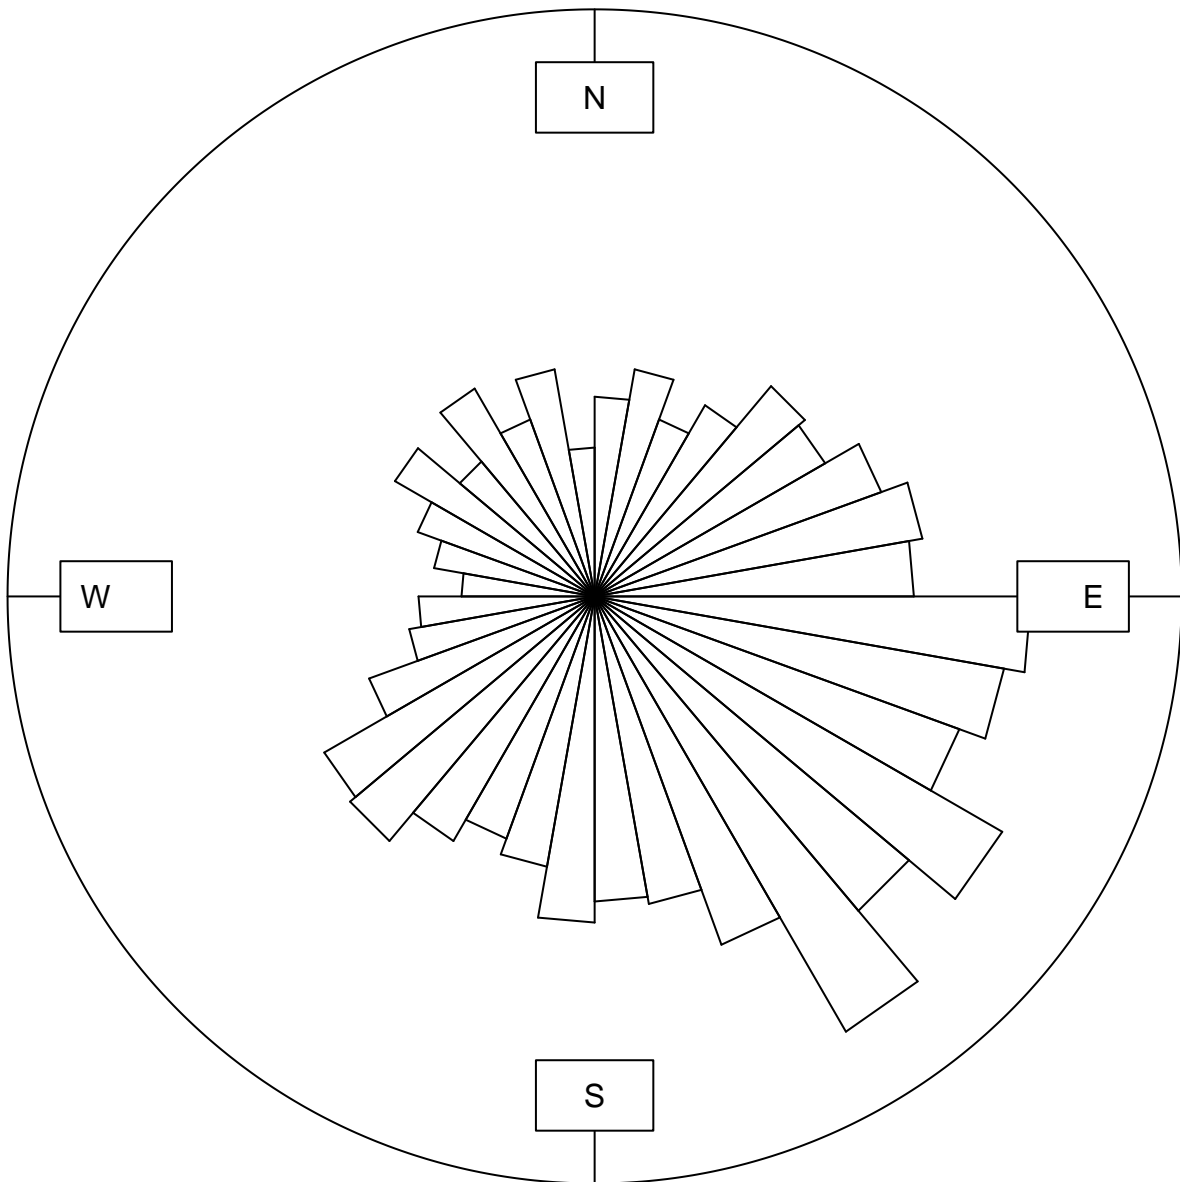

# bootstrap 15

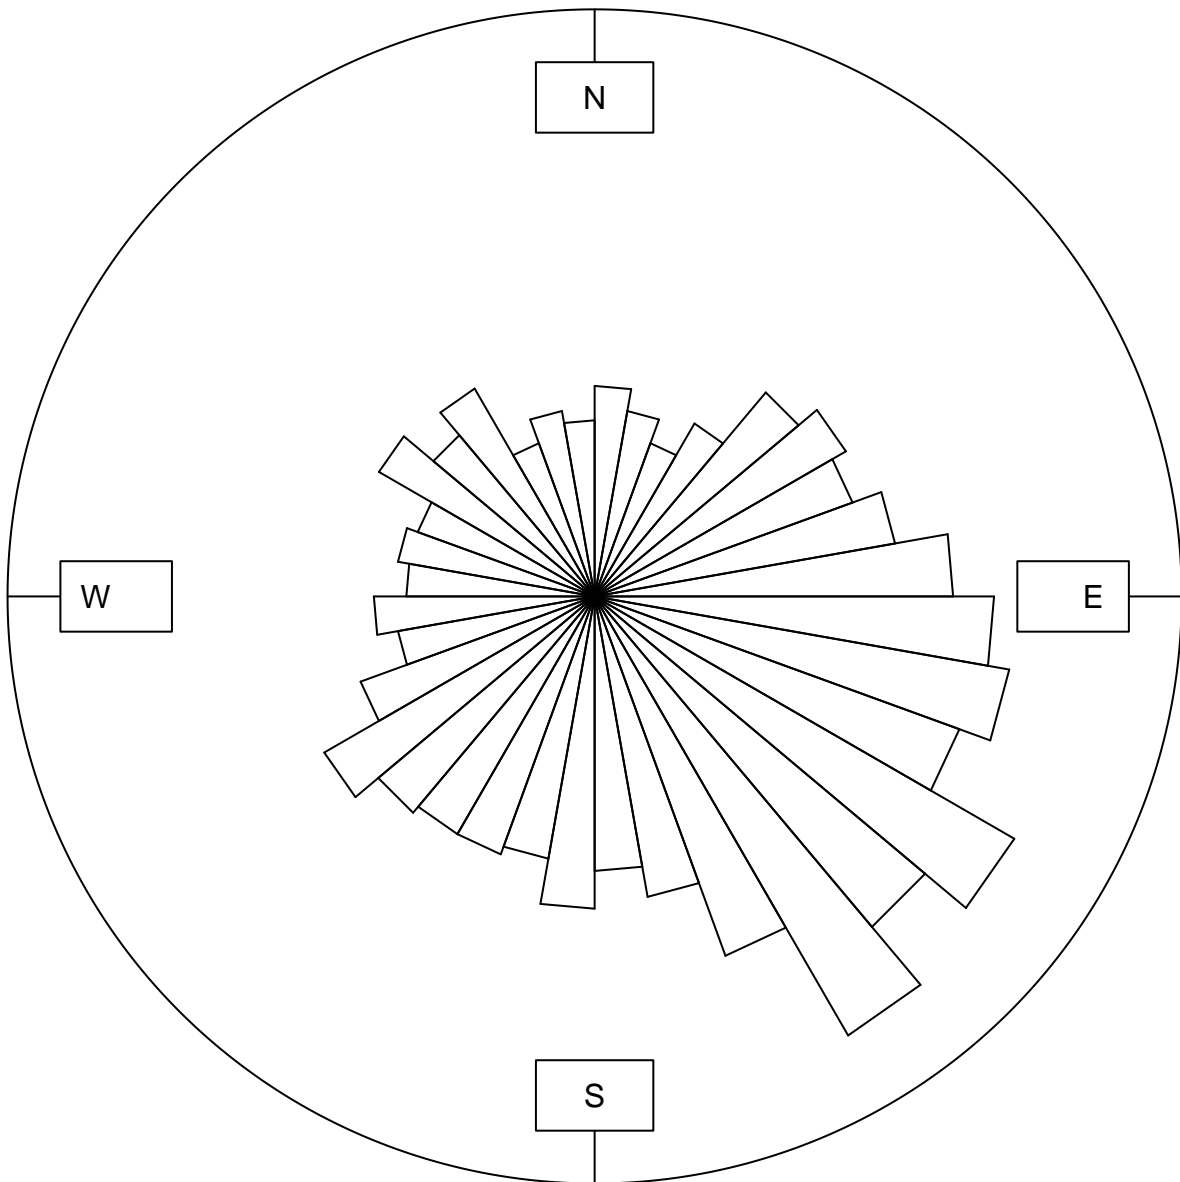

# bootstrap 16

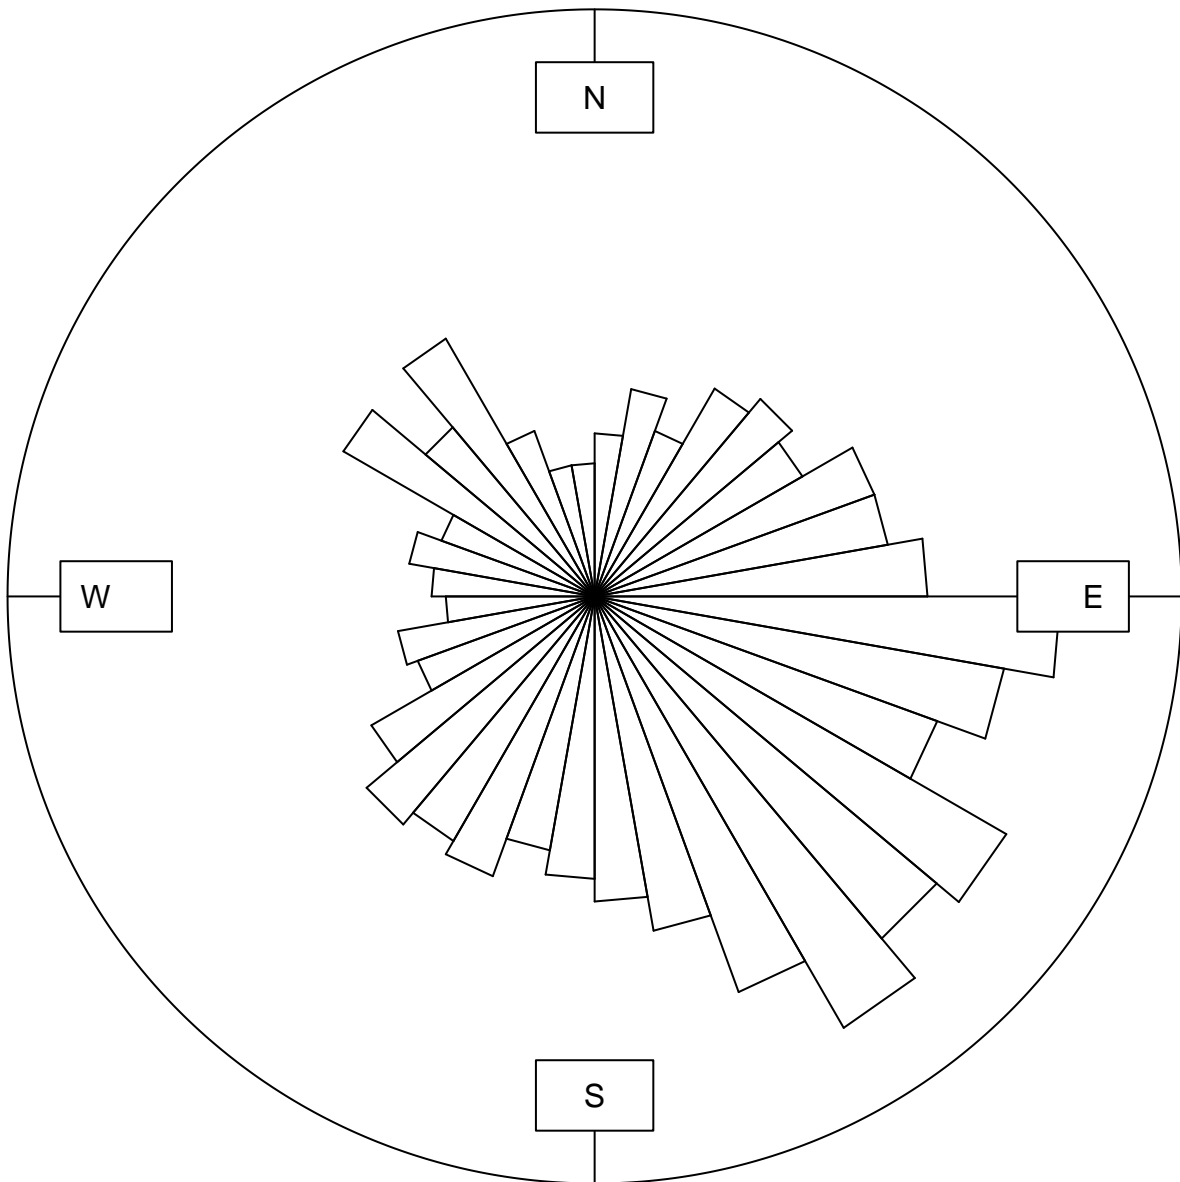



# bootstrap 17

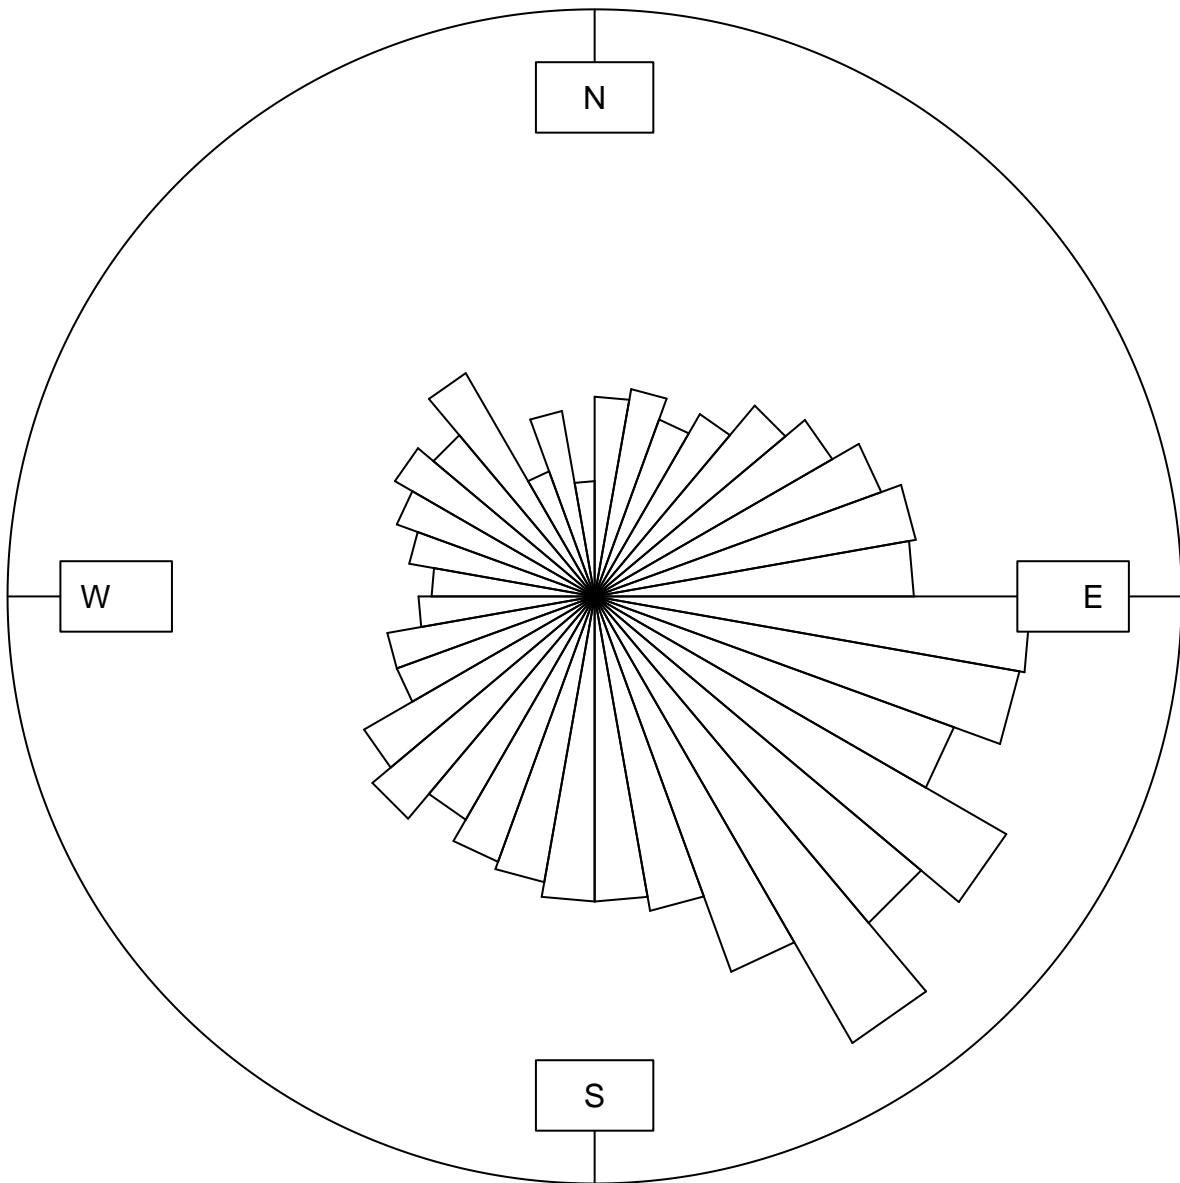

# bootstrap 18

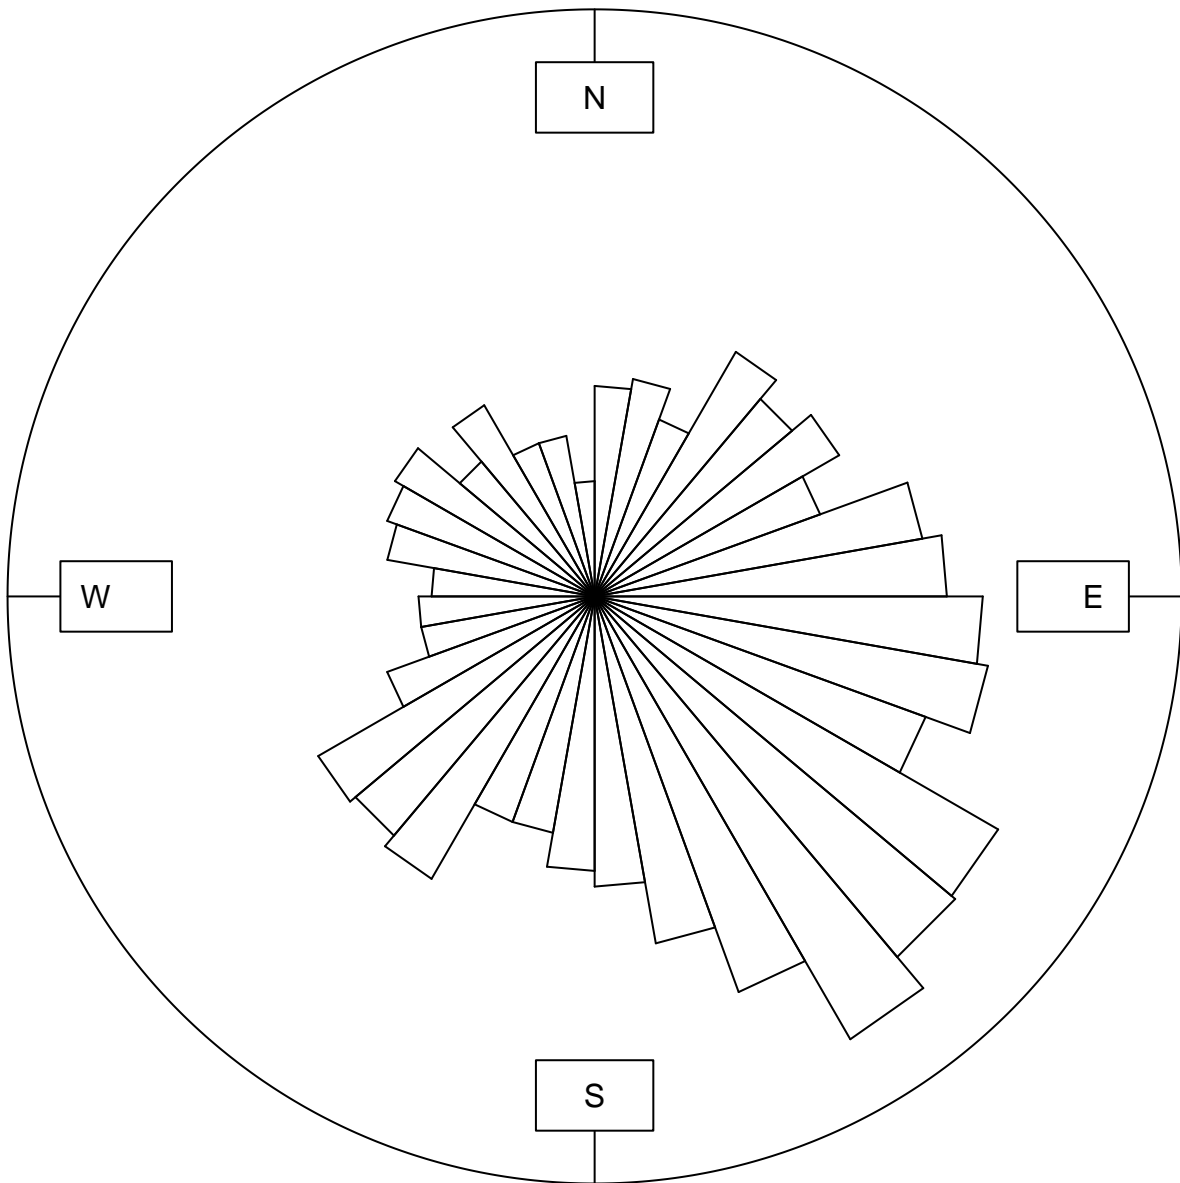

# bootstrap 19

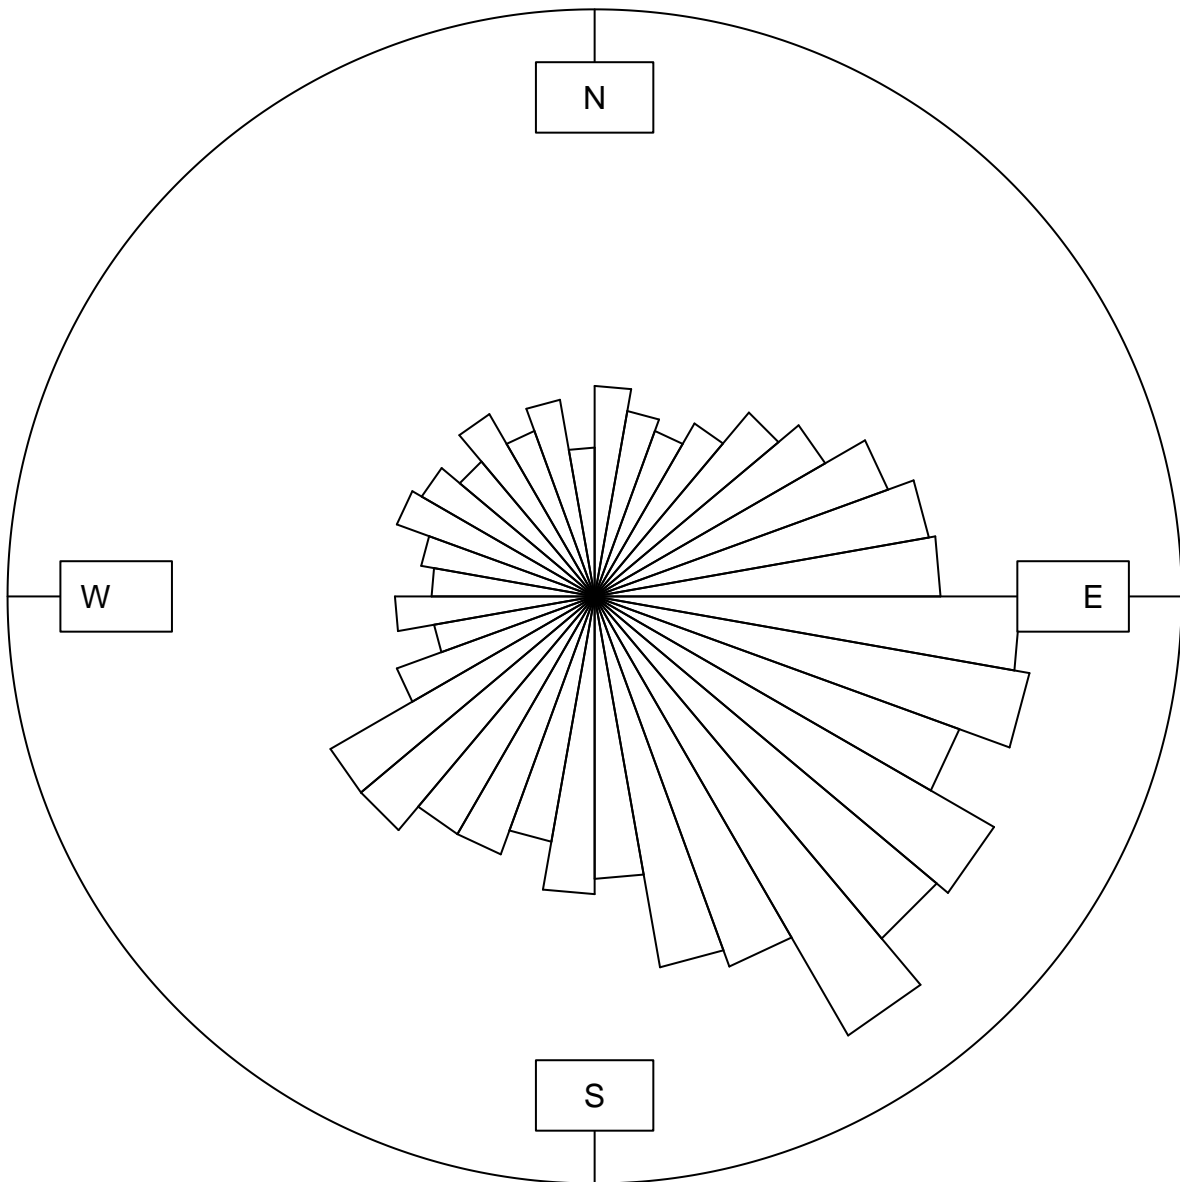

**bootstrap 20**

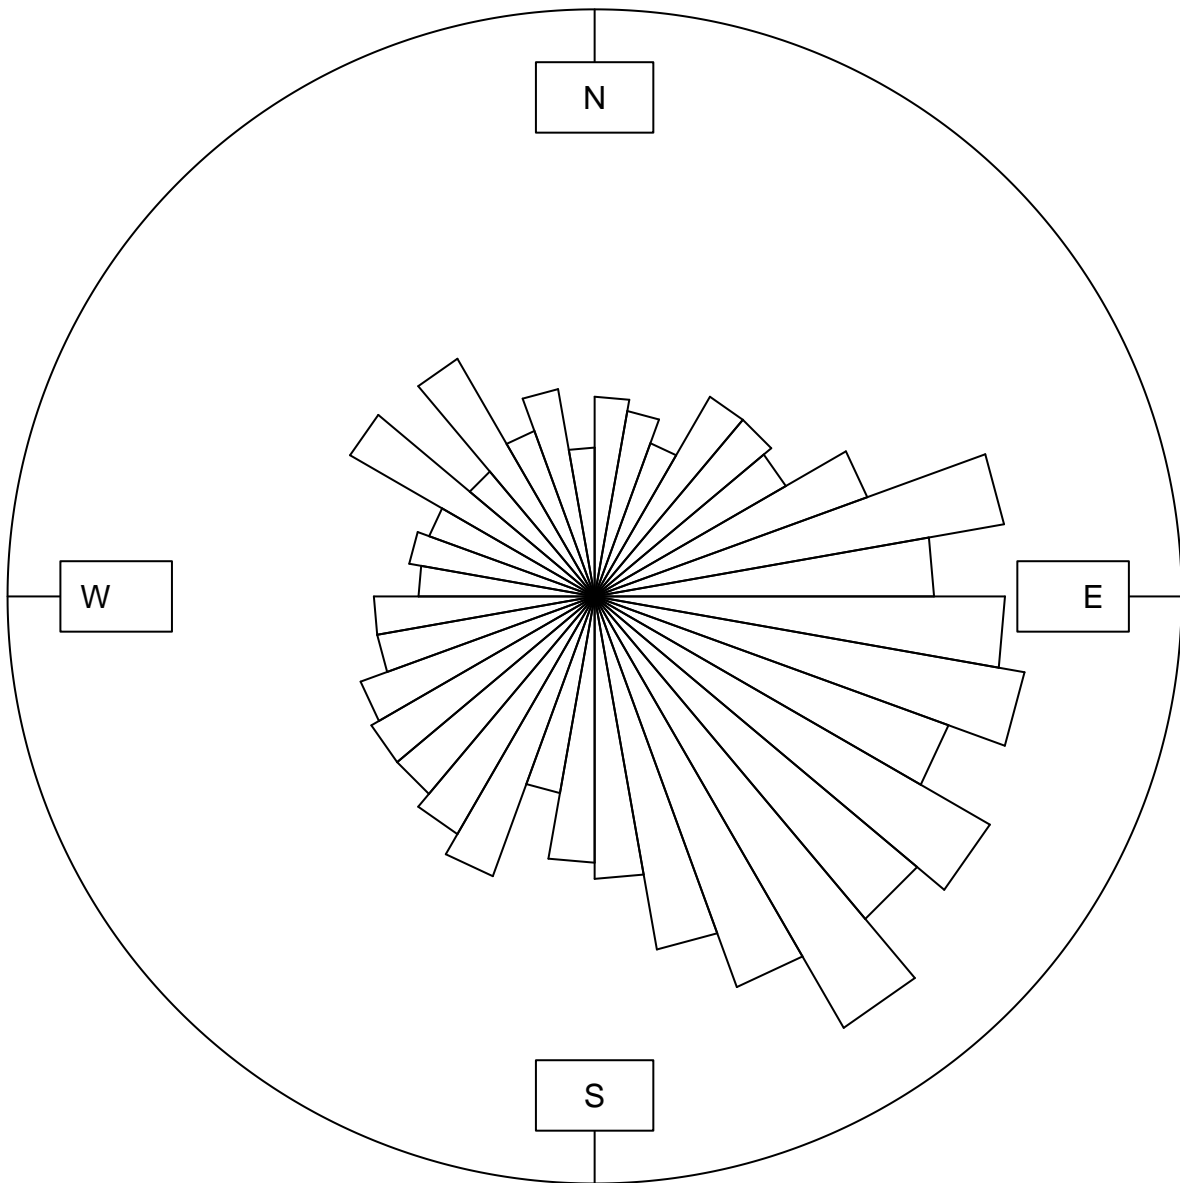

# bootstrap 21

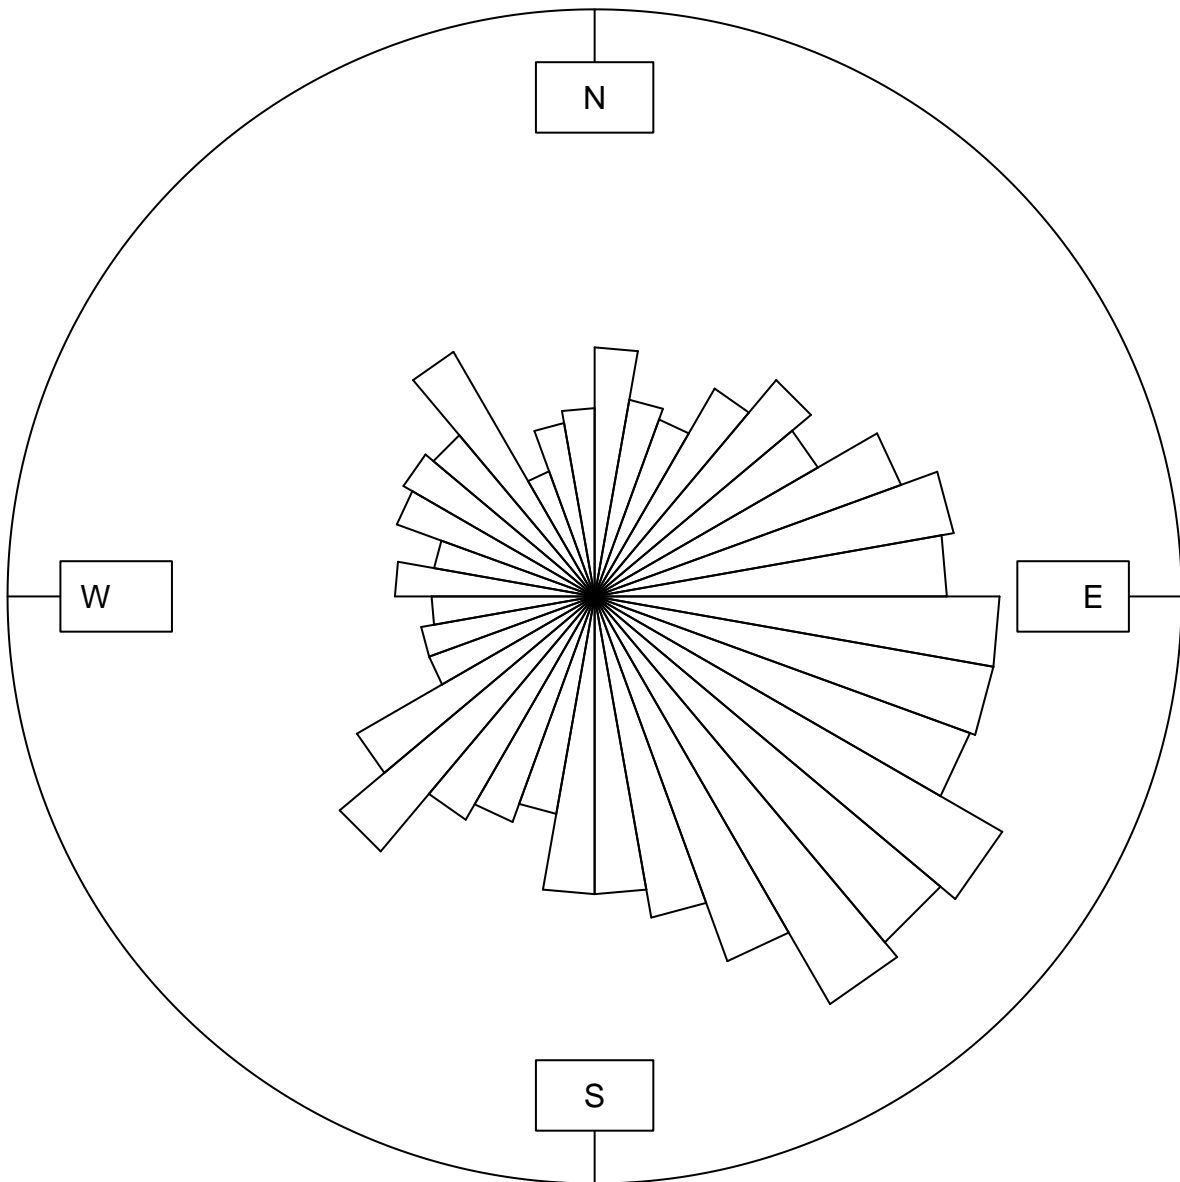

# bootstrap 22

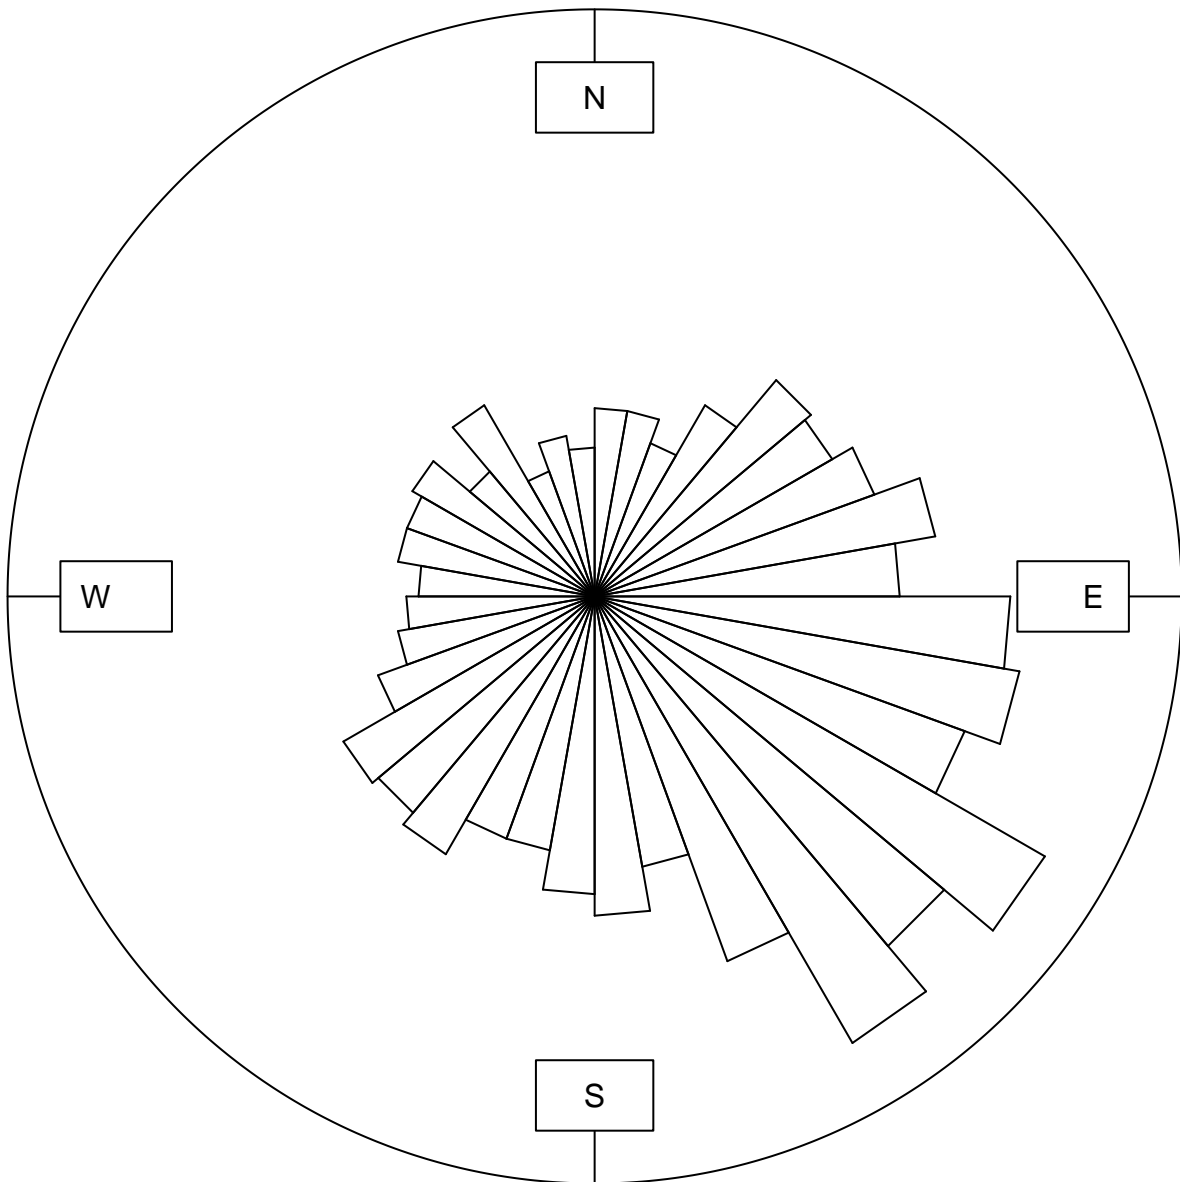

# bootstrap 23

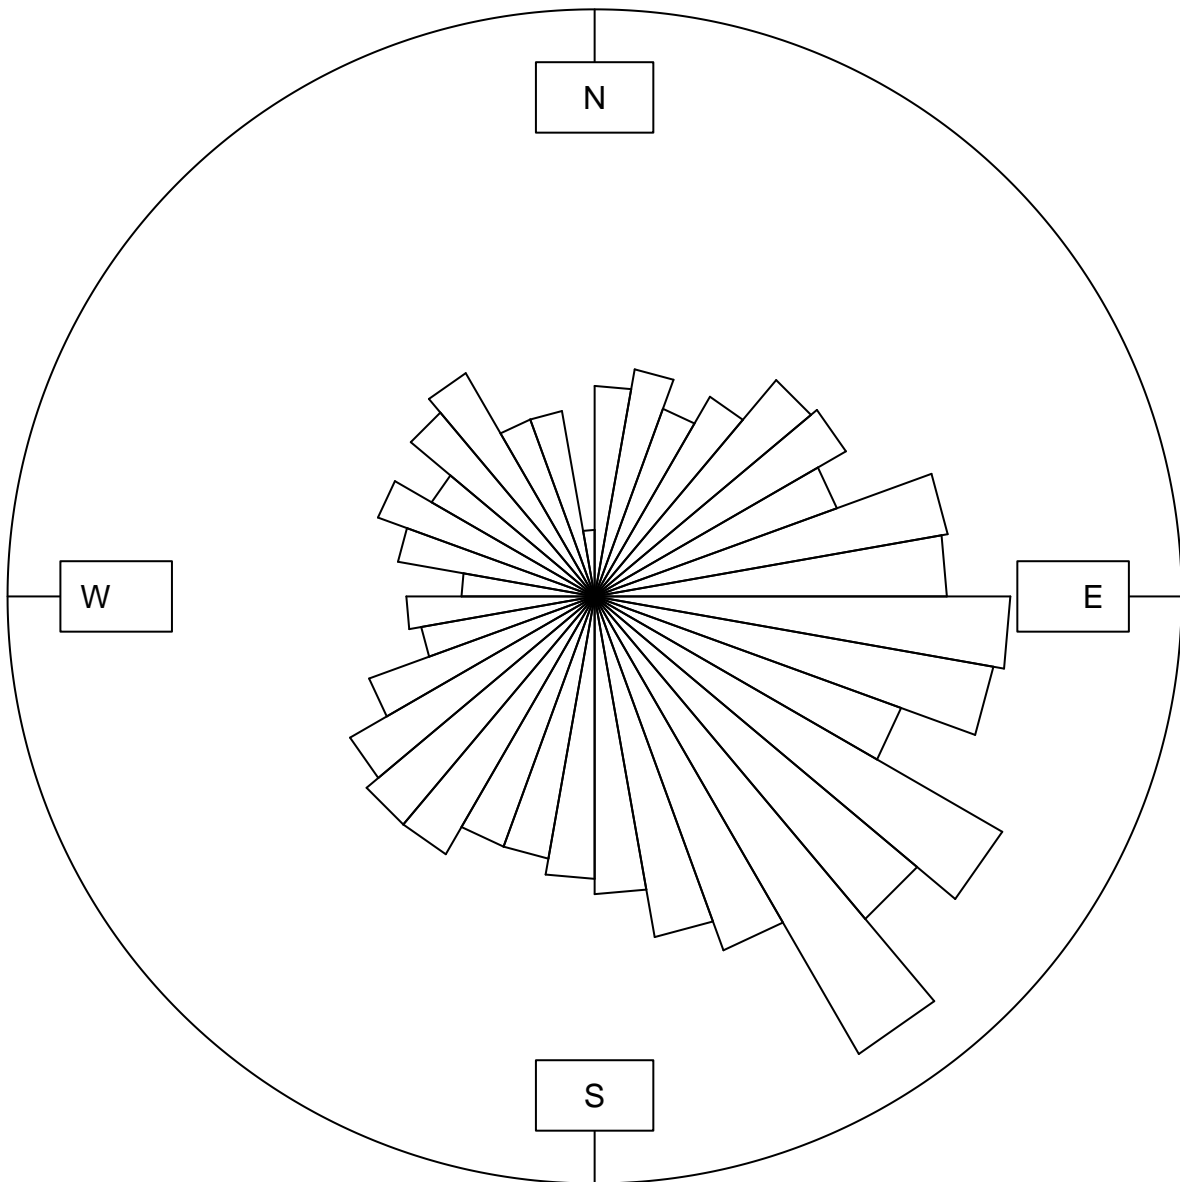

# bootstrap 24

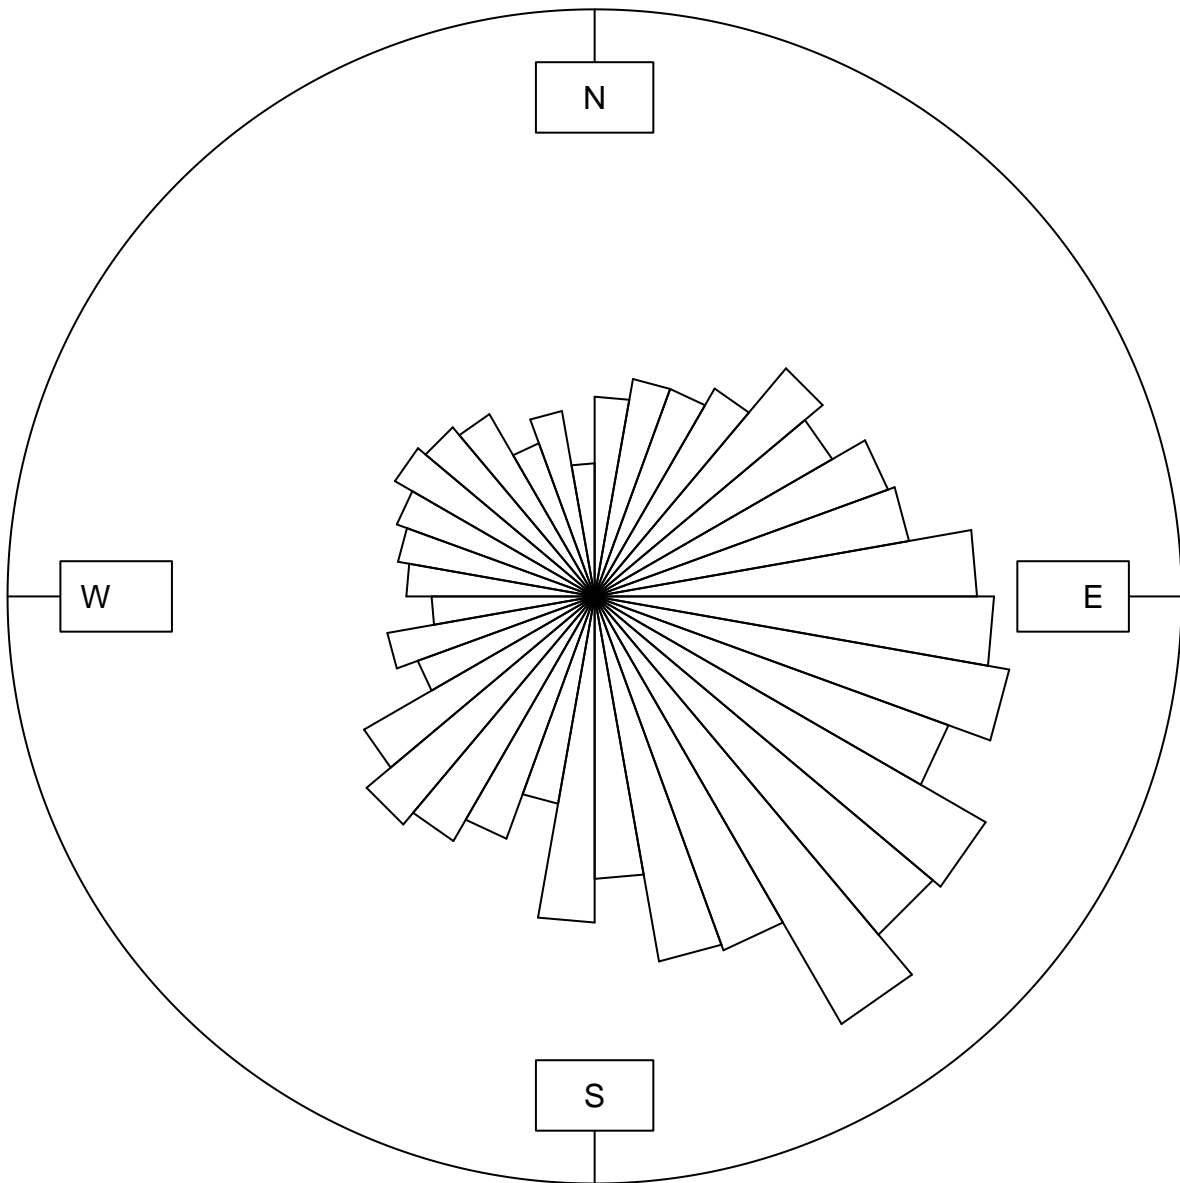



# bootstrap 25

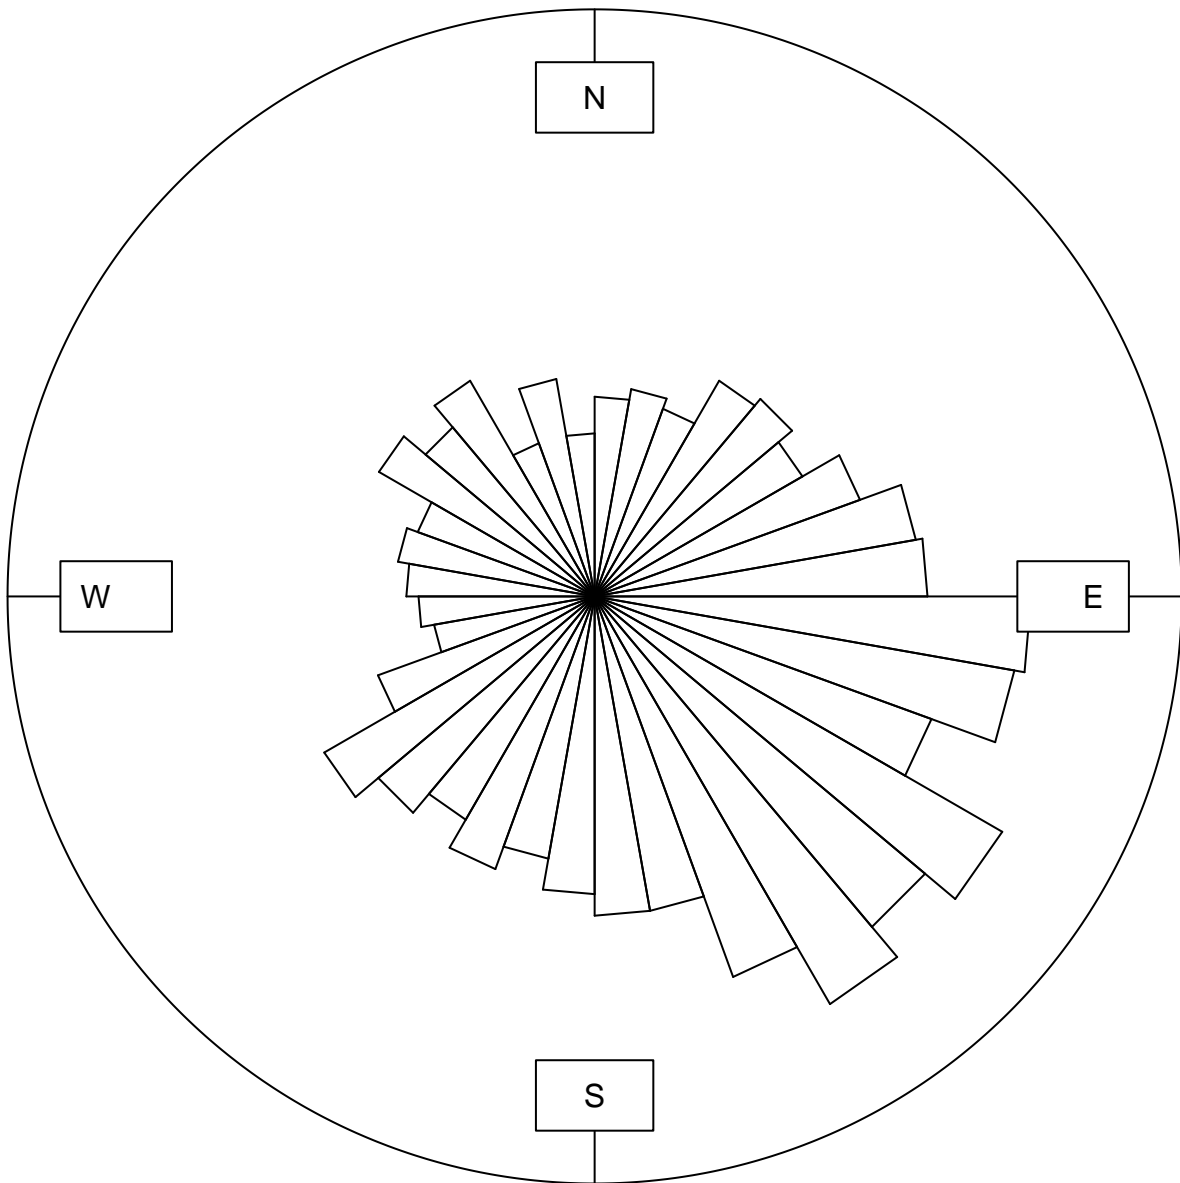

# bootstrap 26

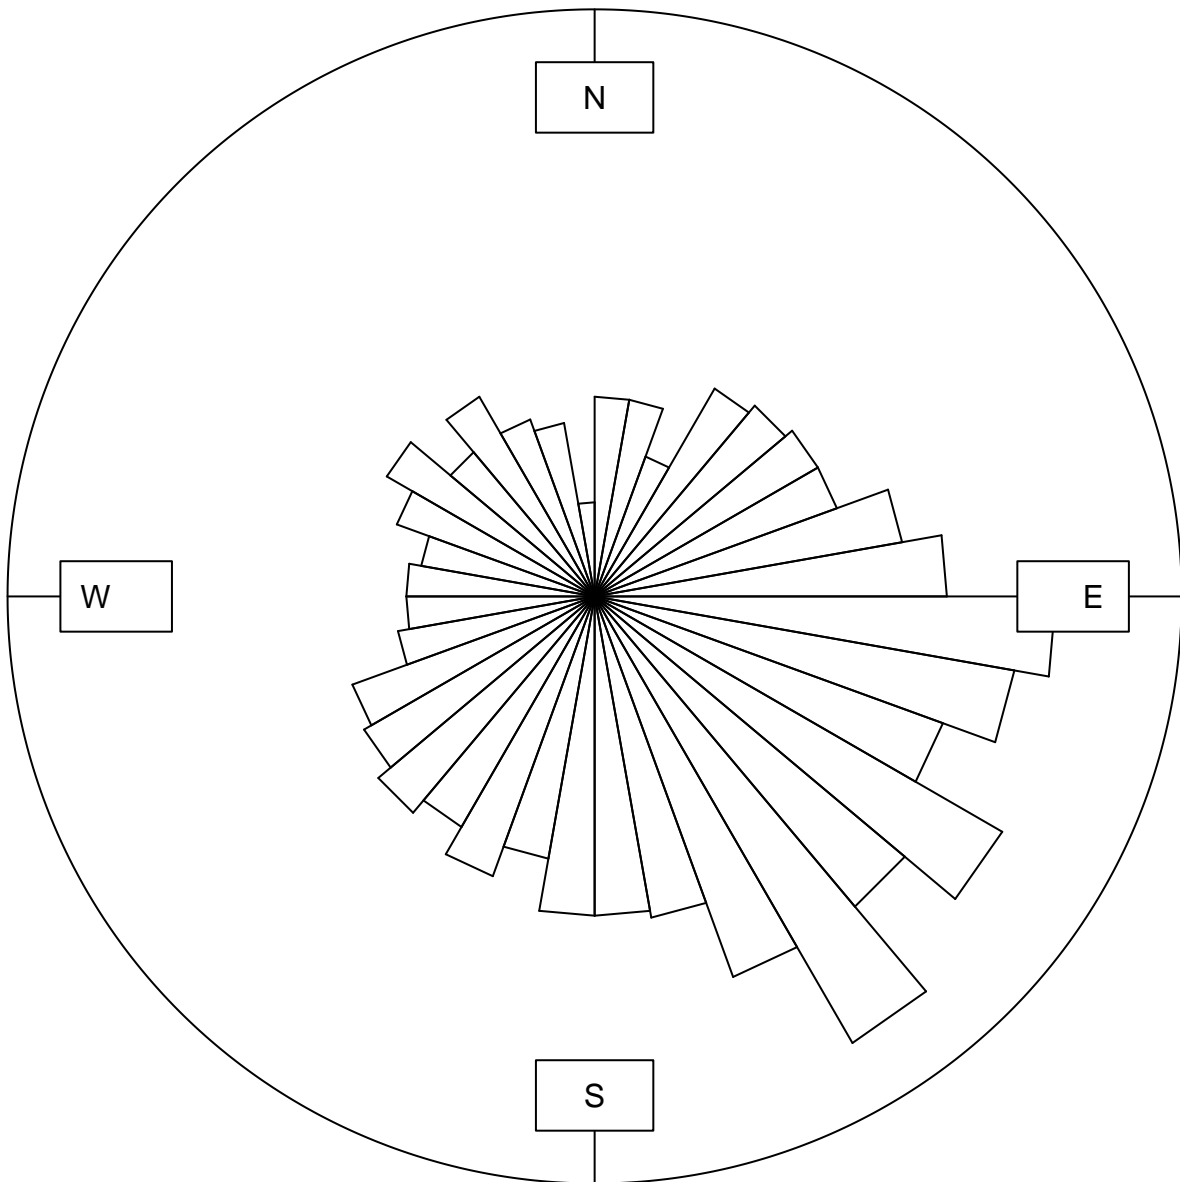

# bootstrap 27

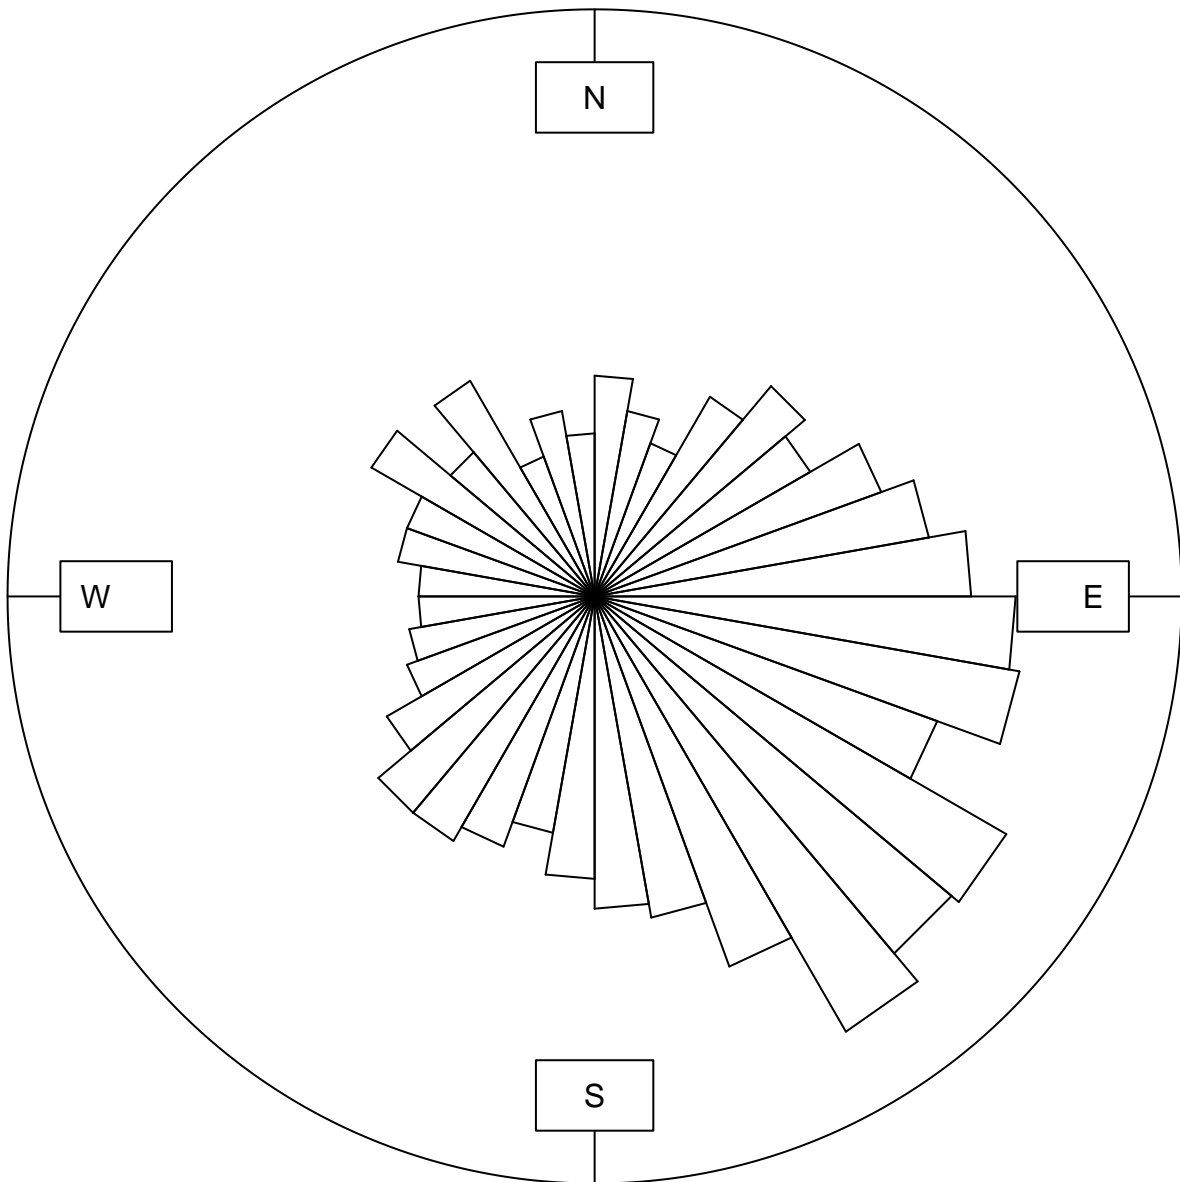

# bootstrap 28

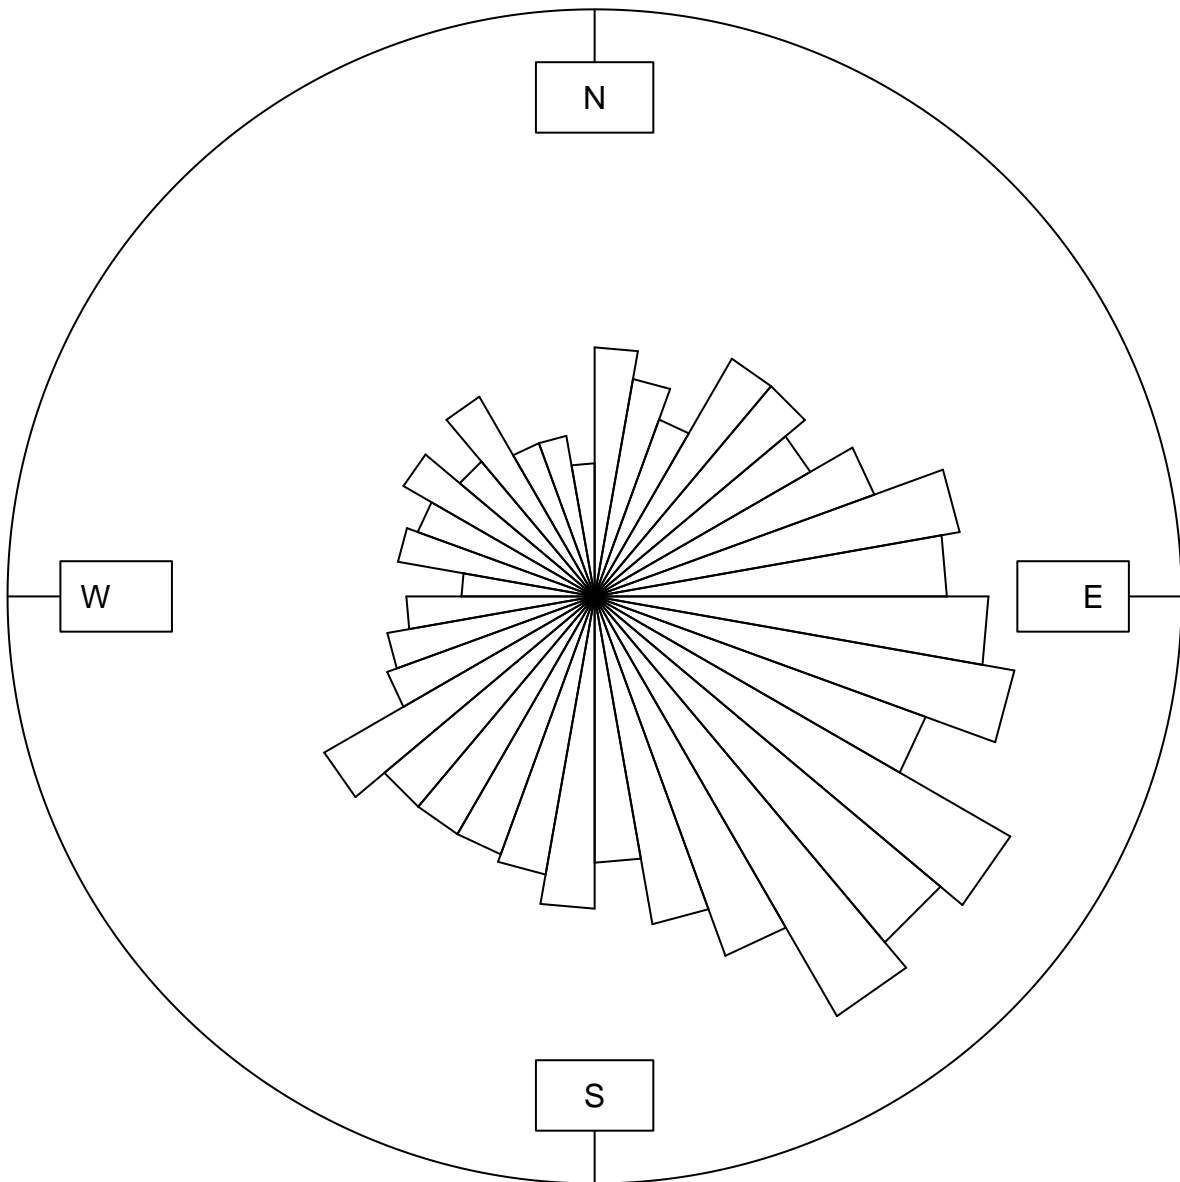

# bootstrap 29

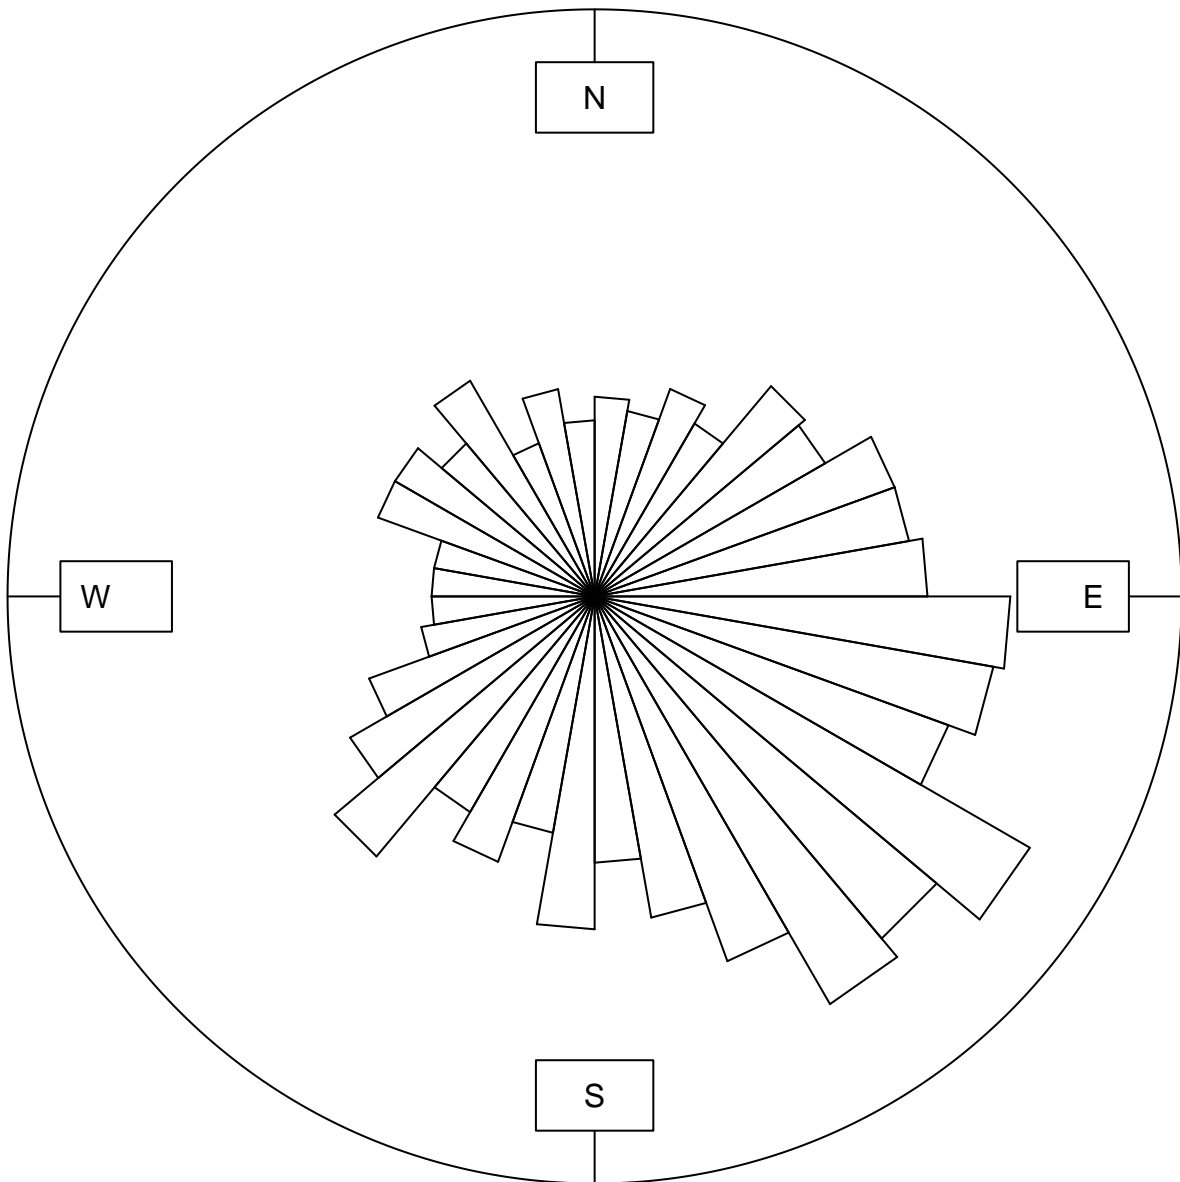

# bootstrap 30

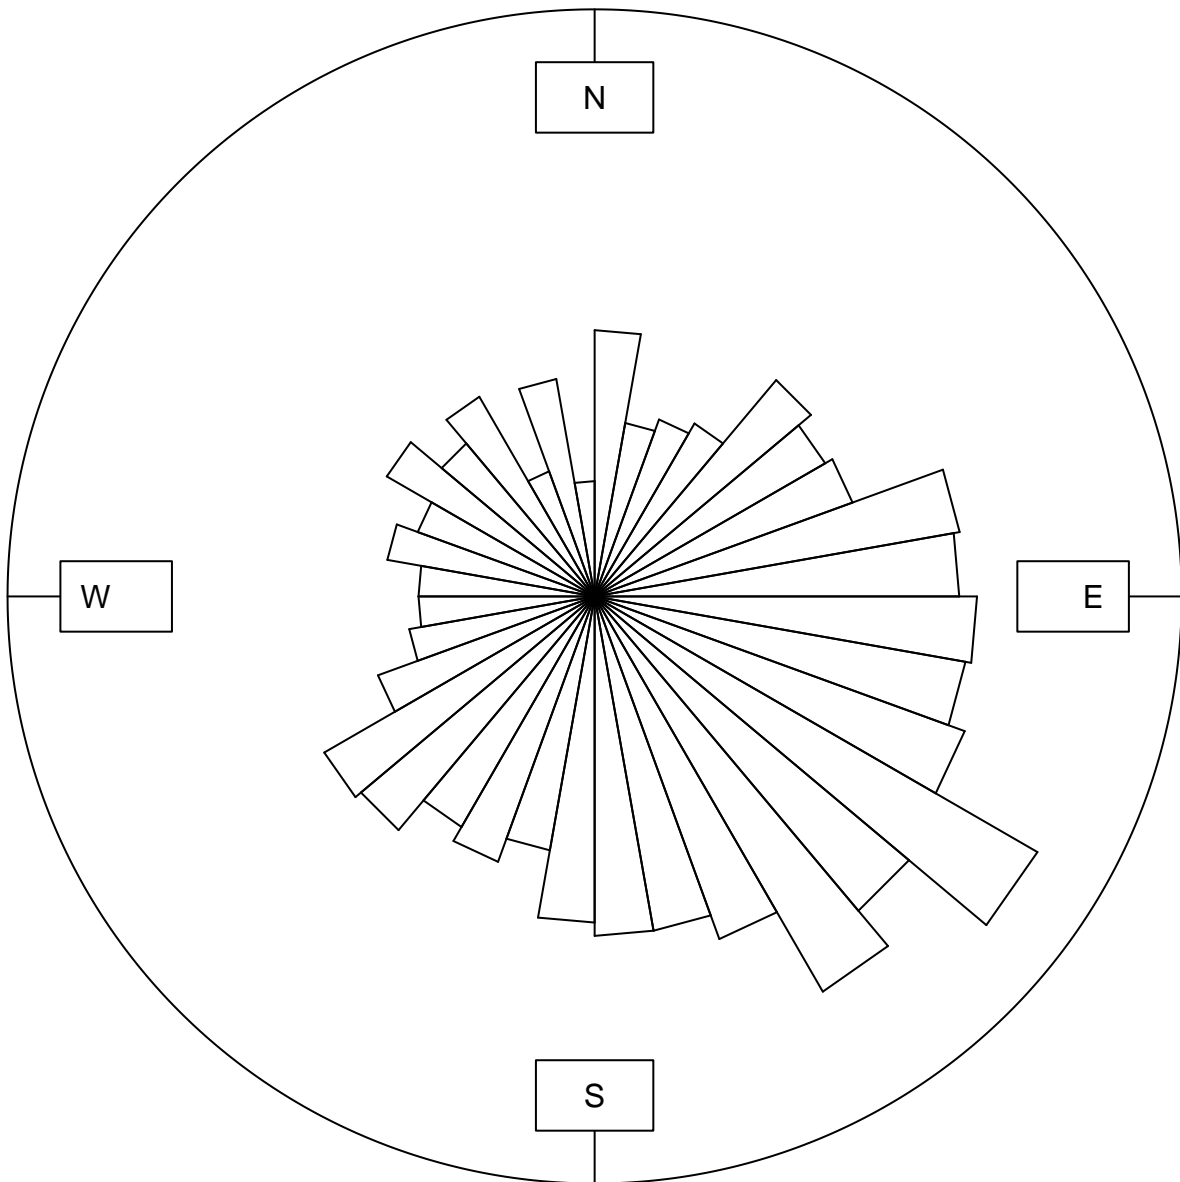

# bootstrap 31

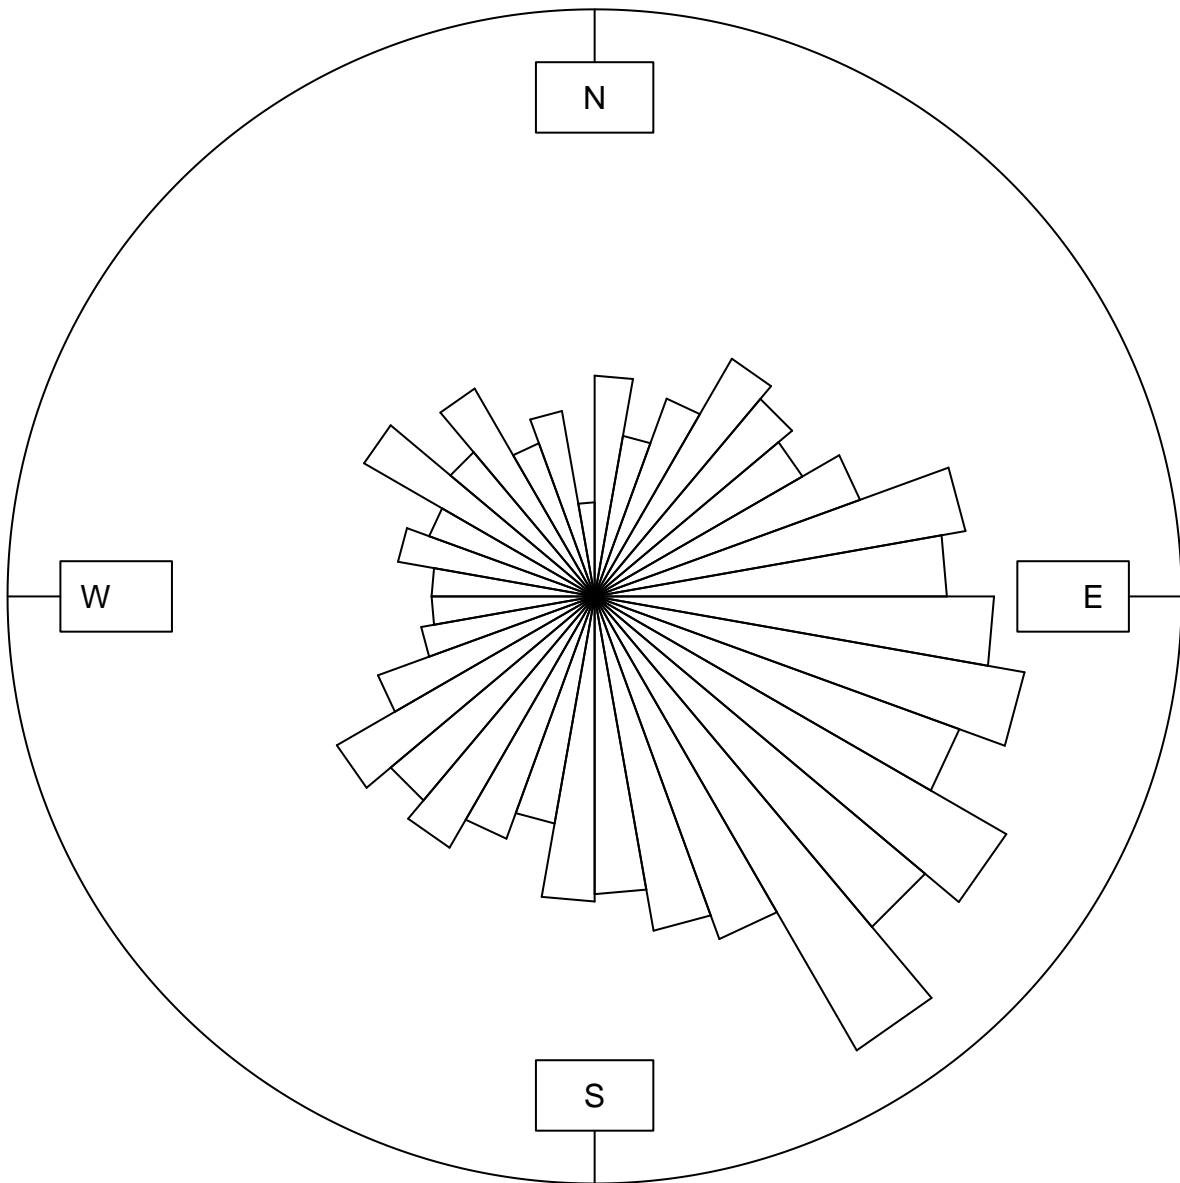

# bootstrap 32

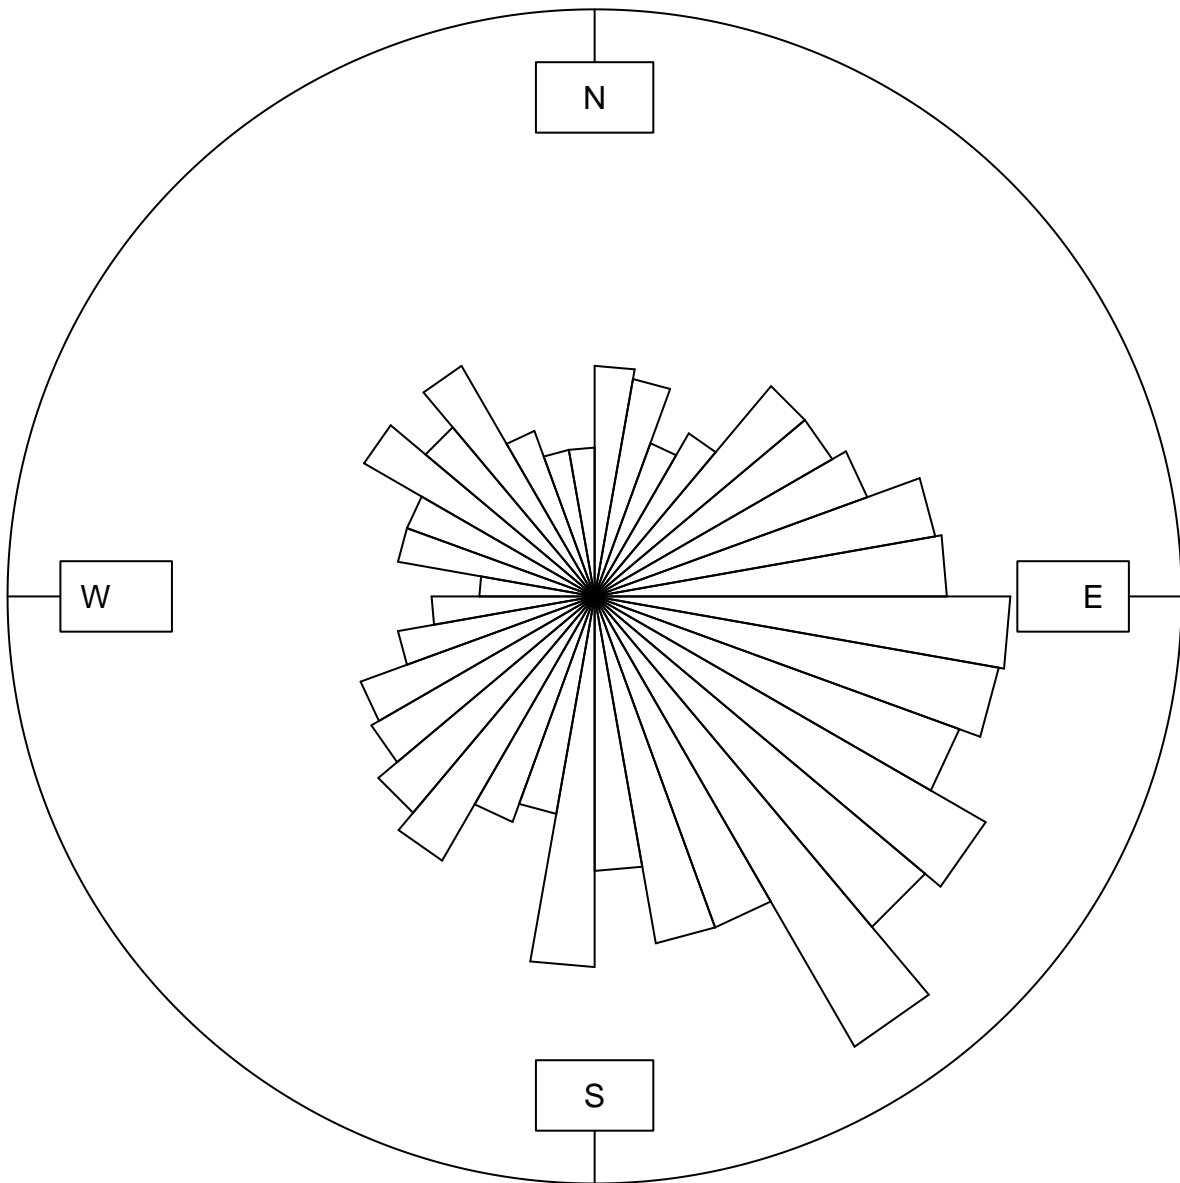



# bootstrap 33

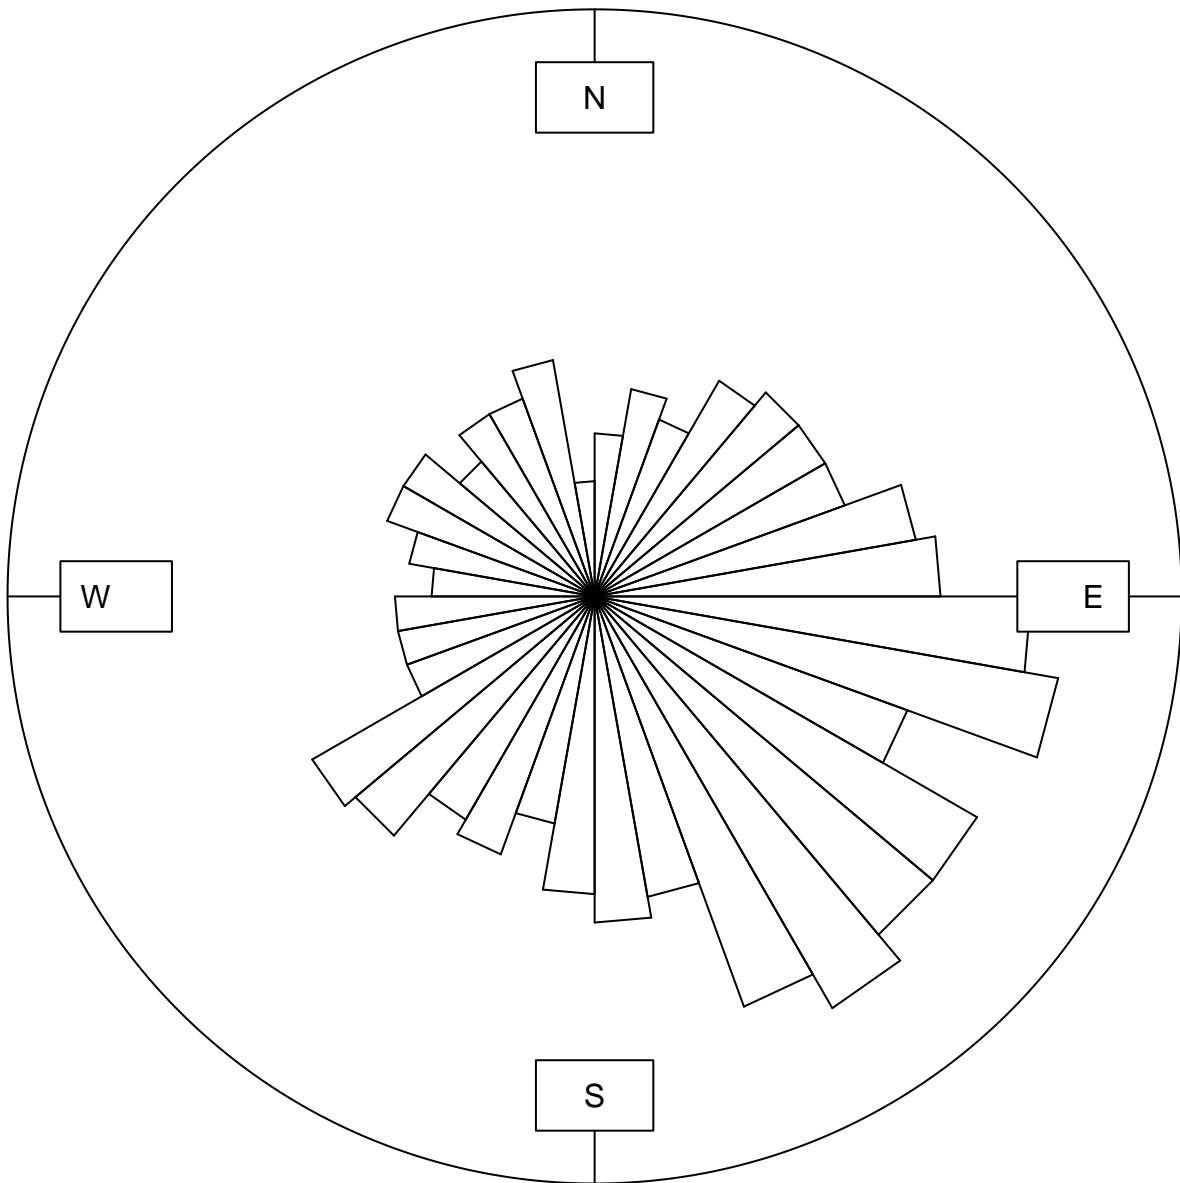

# bootstrap 34

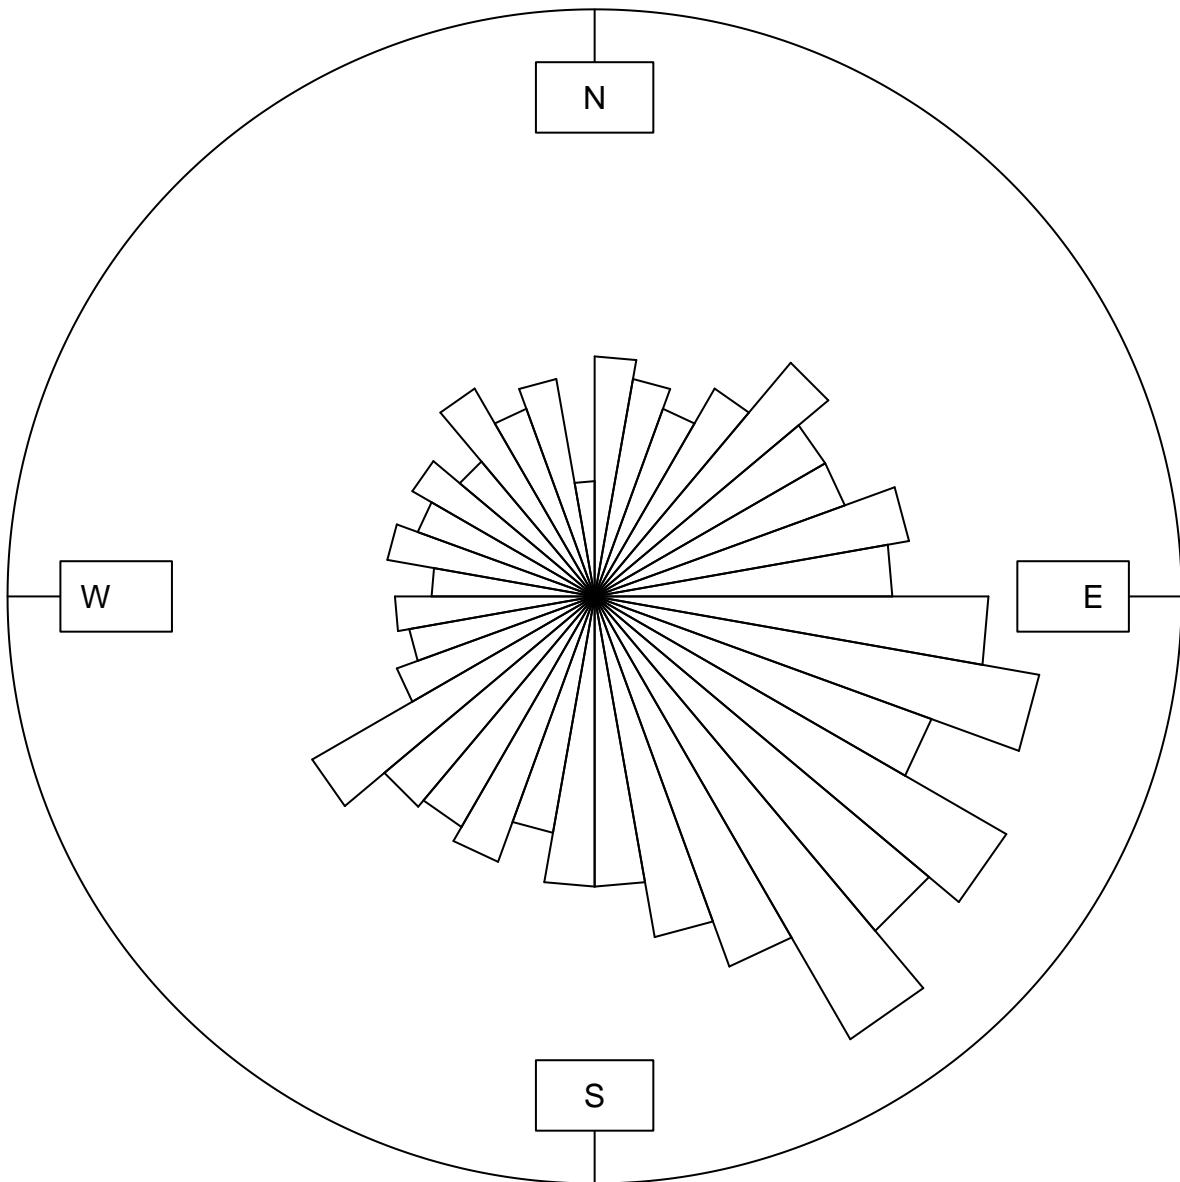

# bootstrap 35

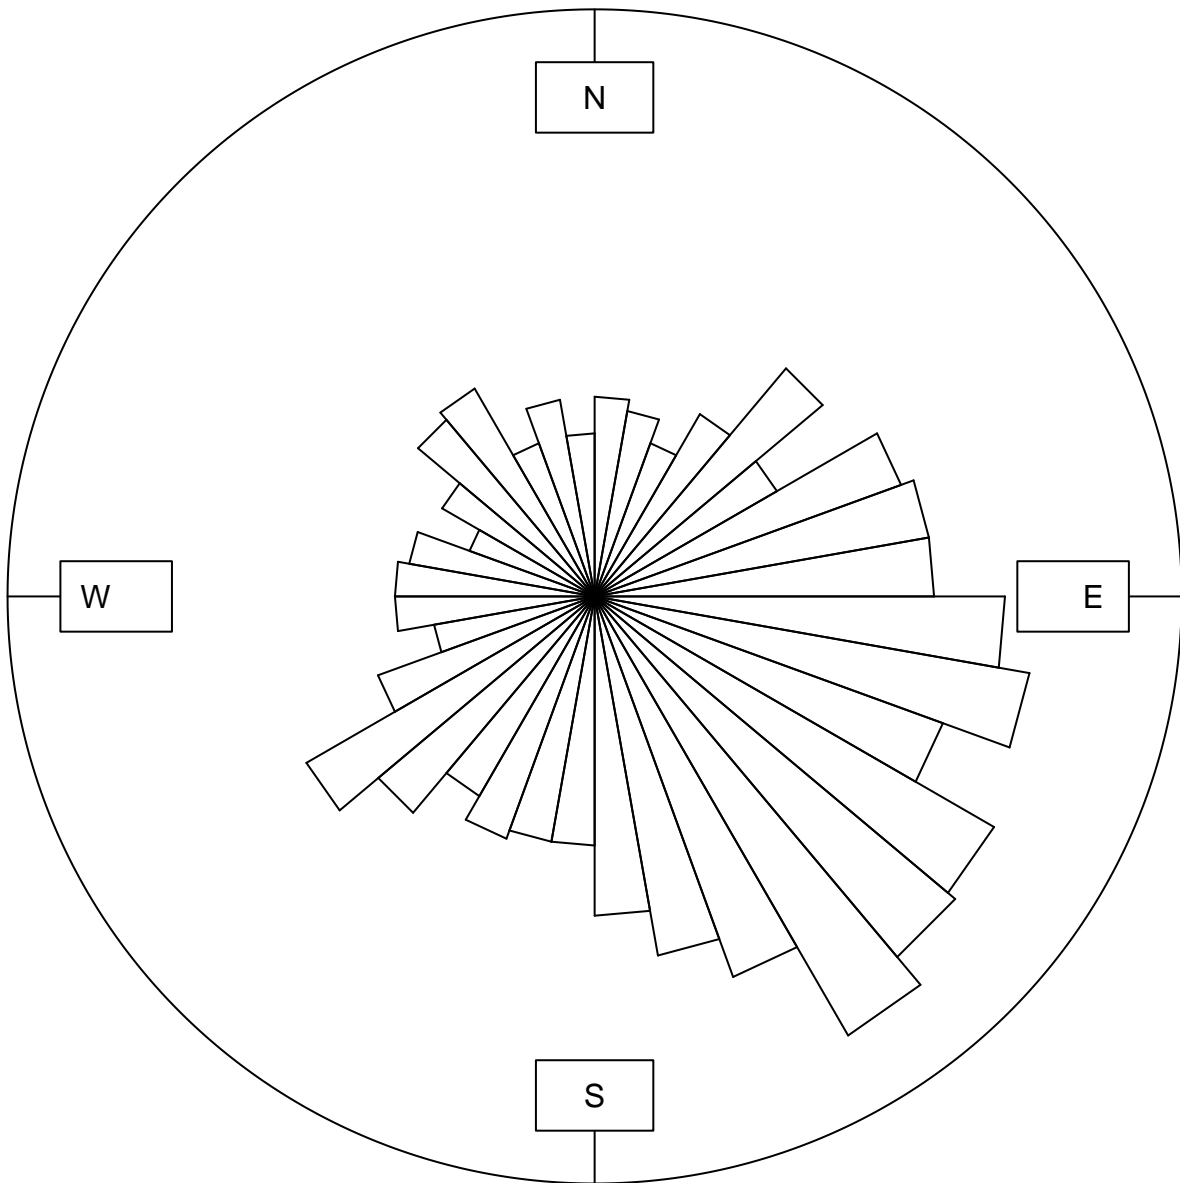

# bootstrap 36

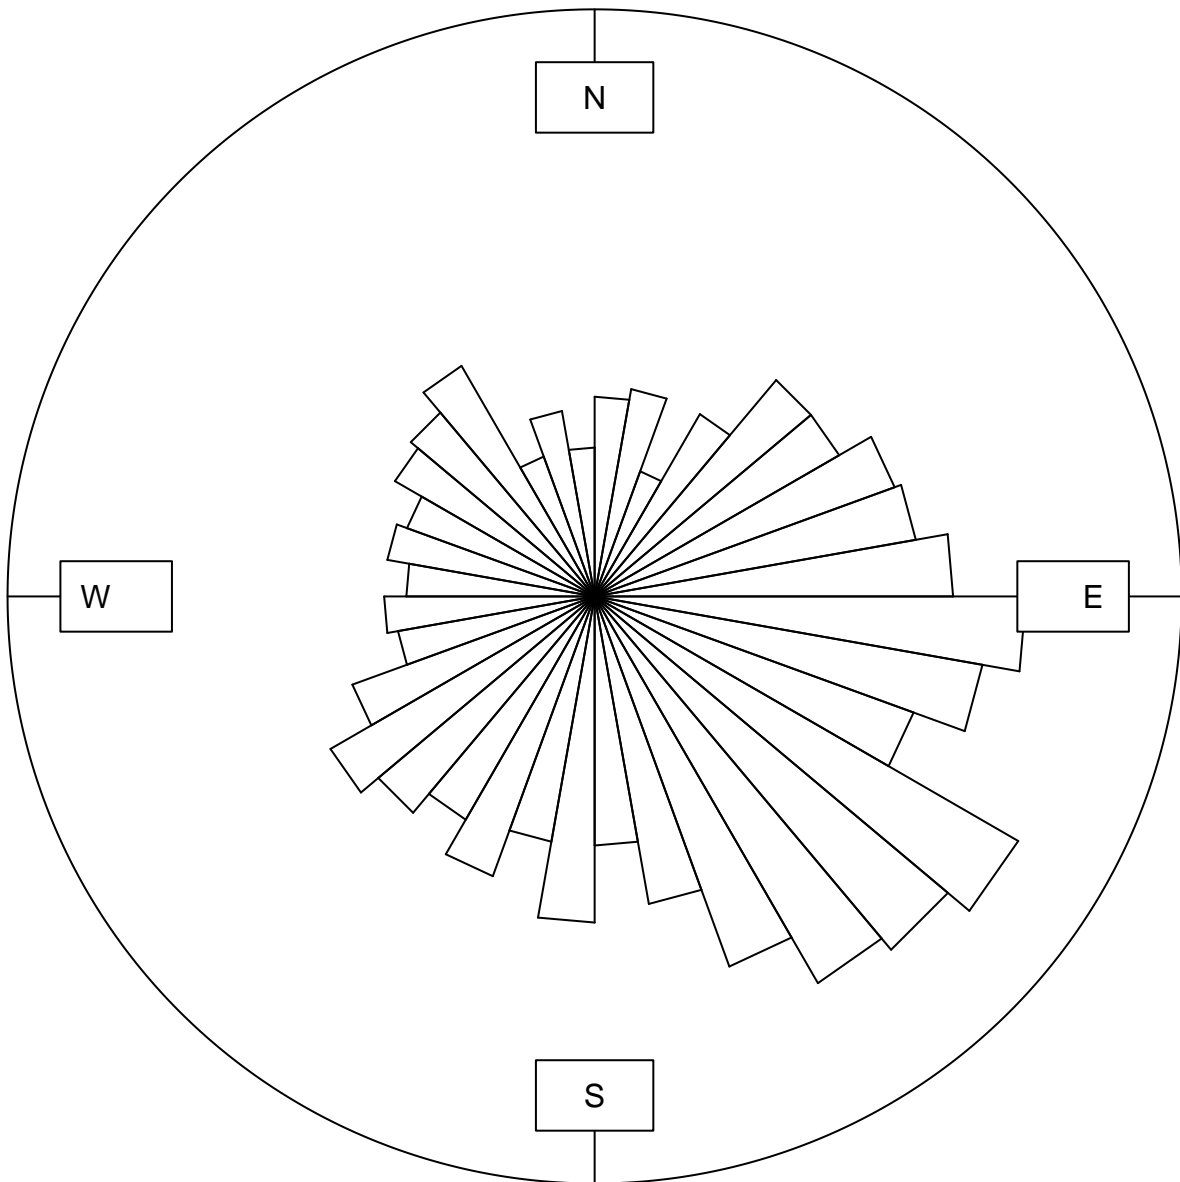

# bootstrap 37

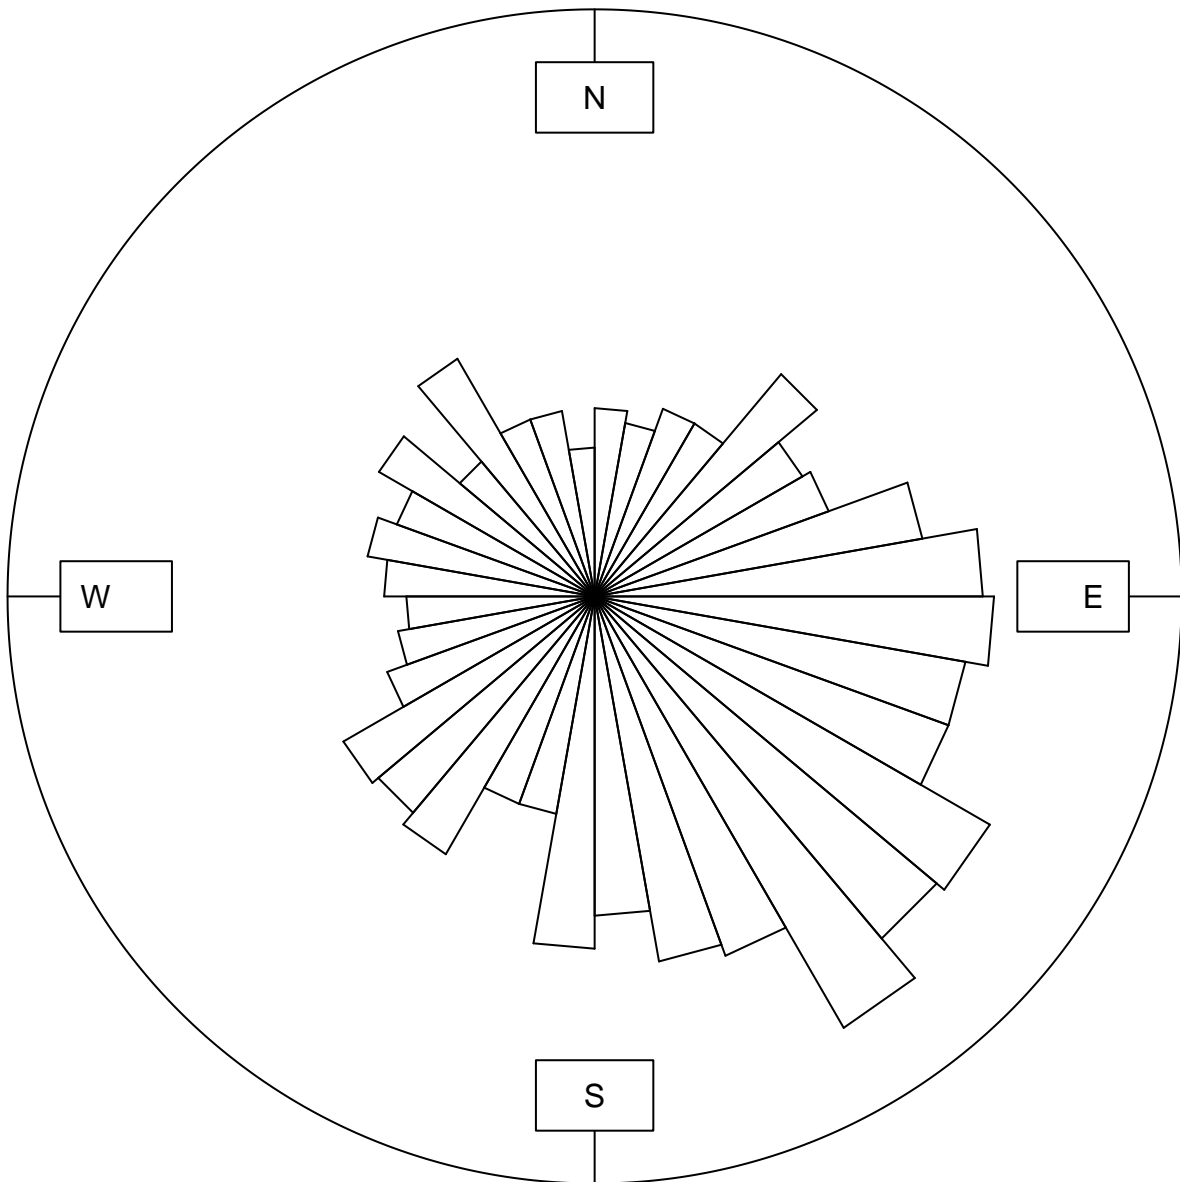

# bootstrap 38

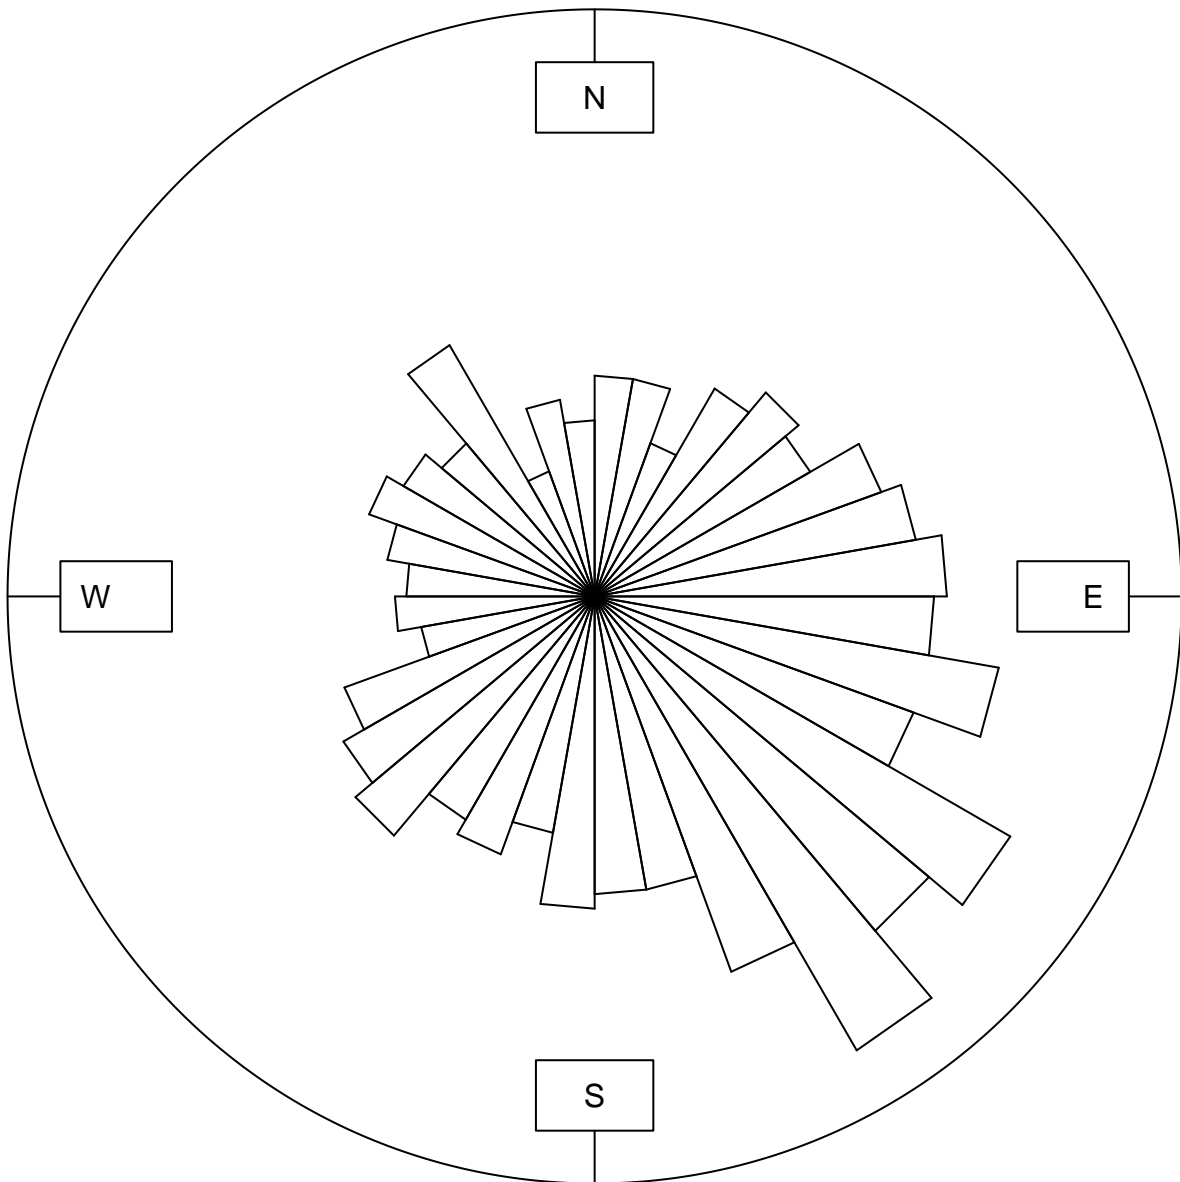

# bootstrap 39

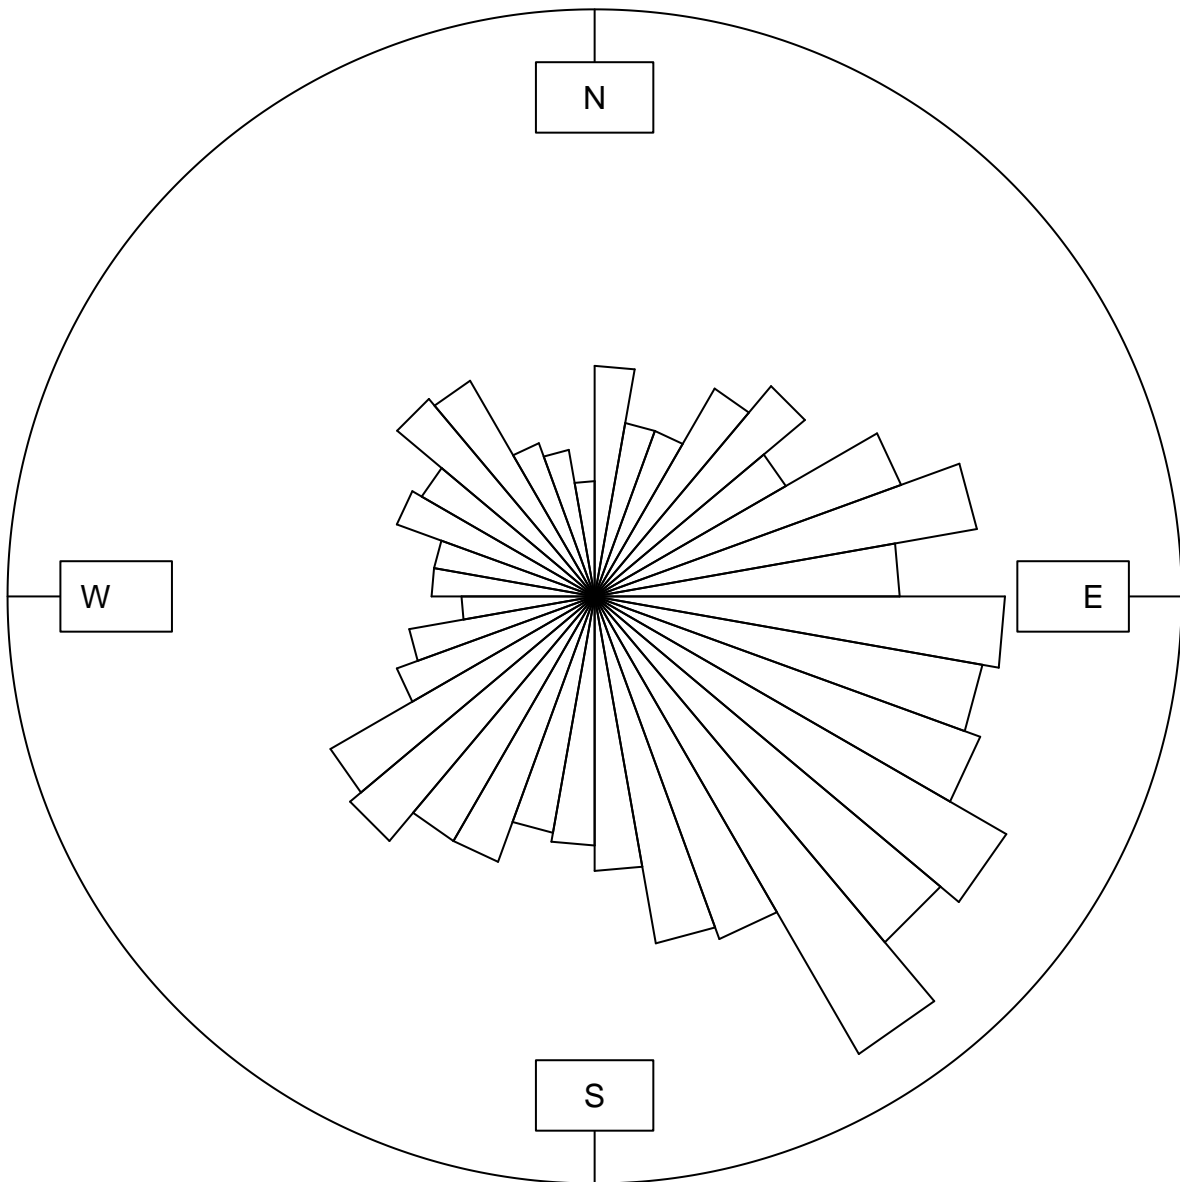

# bootstrap 40

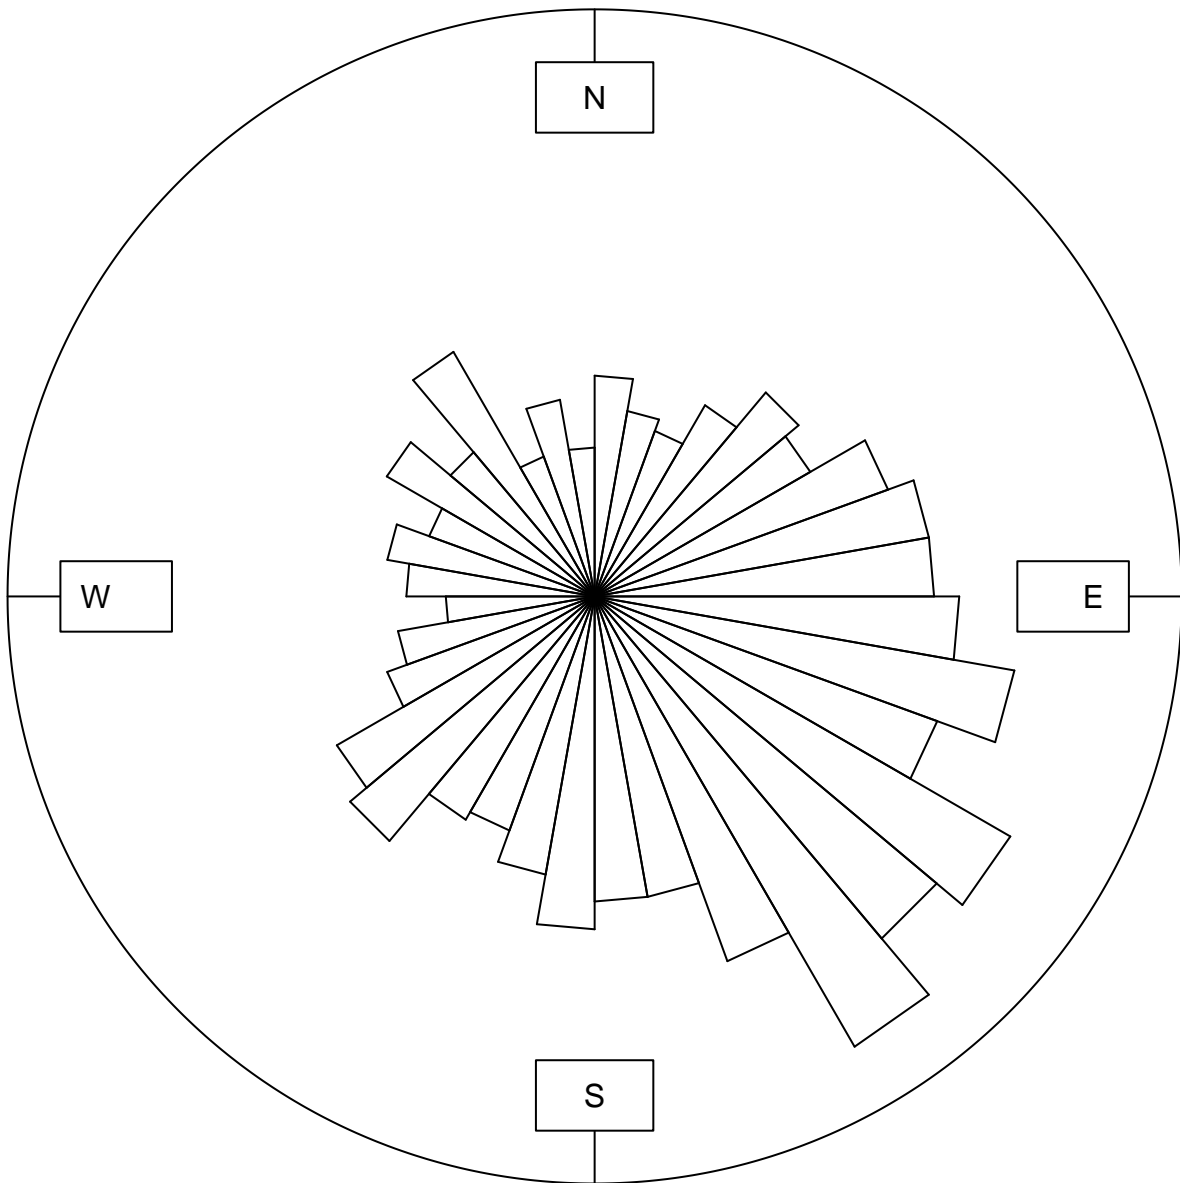



# bootstrap 41

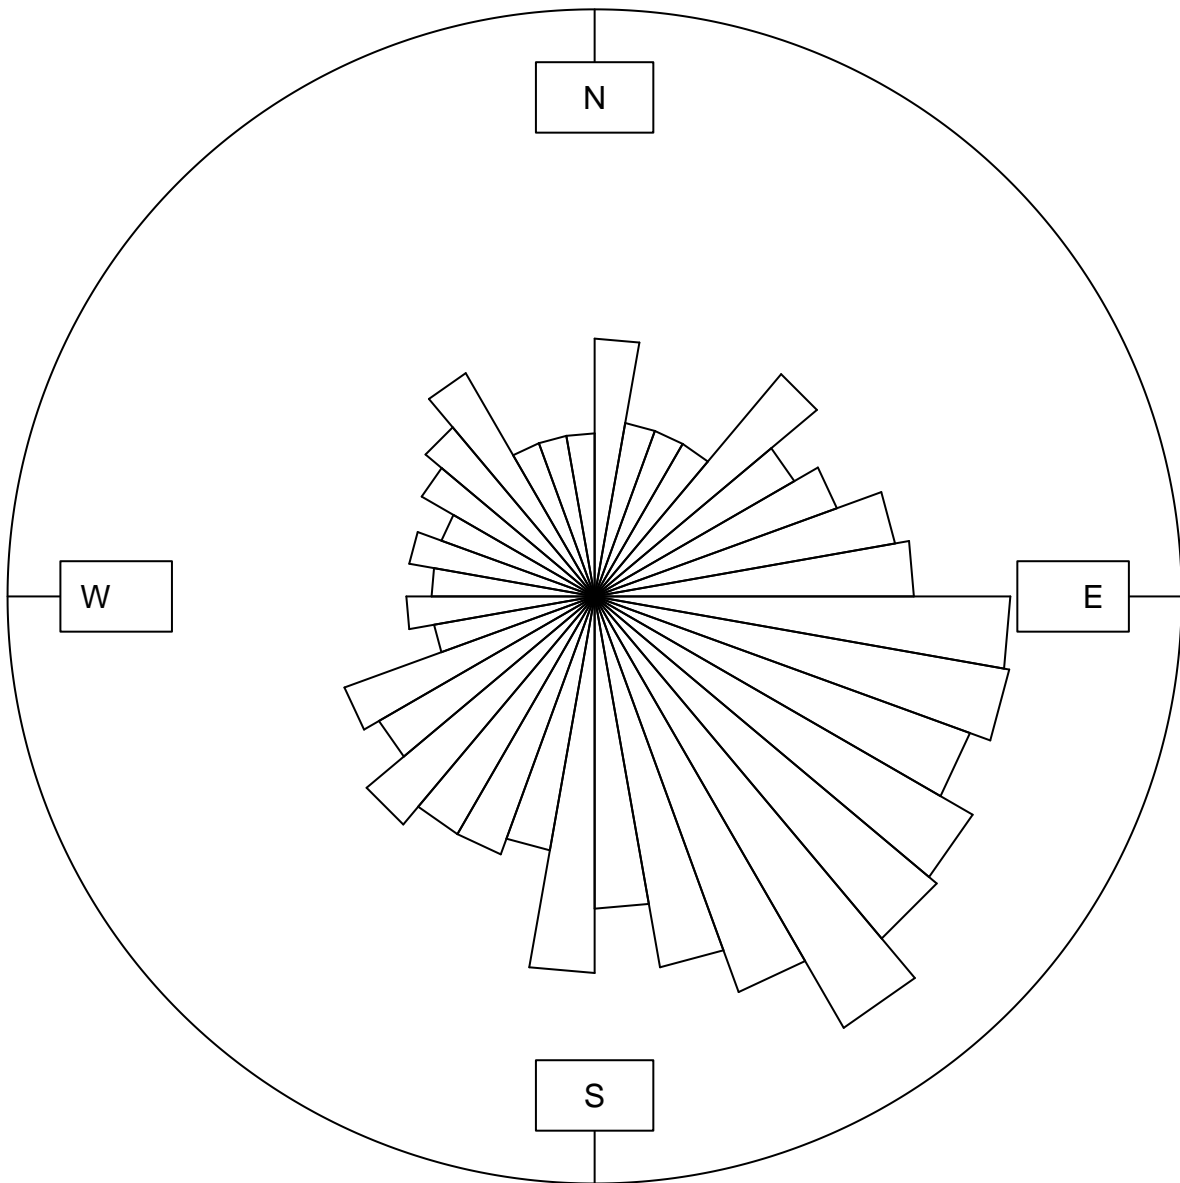

# bootstrap 42

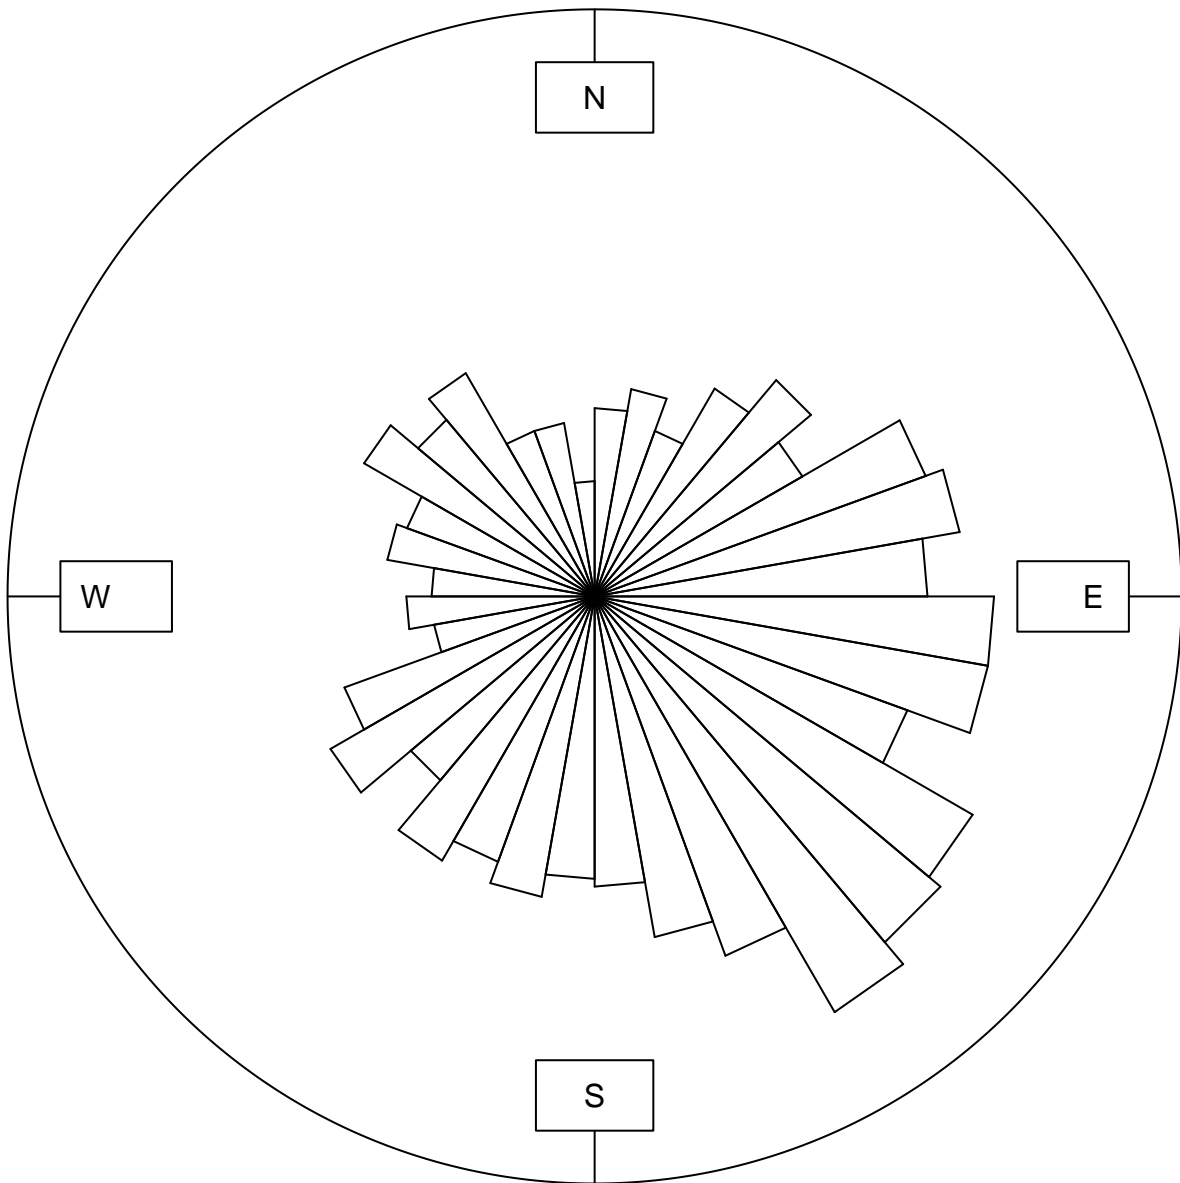

# bootstrap 43

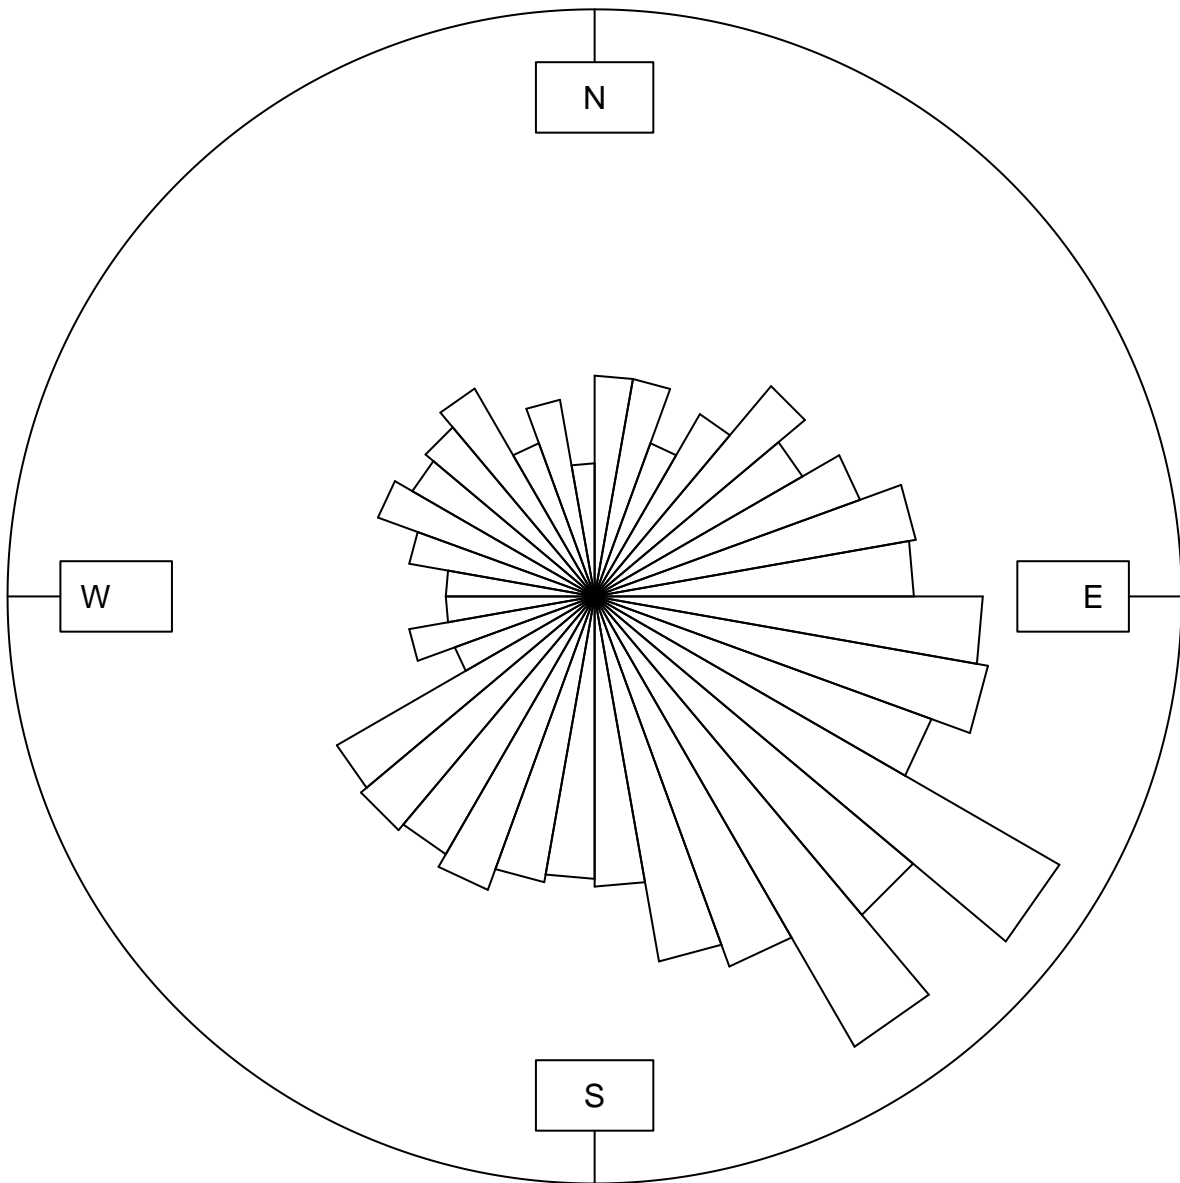

# bootstrap 44

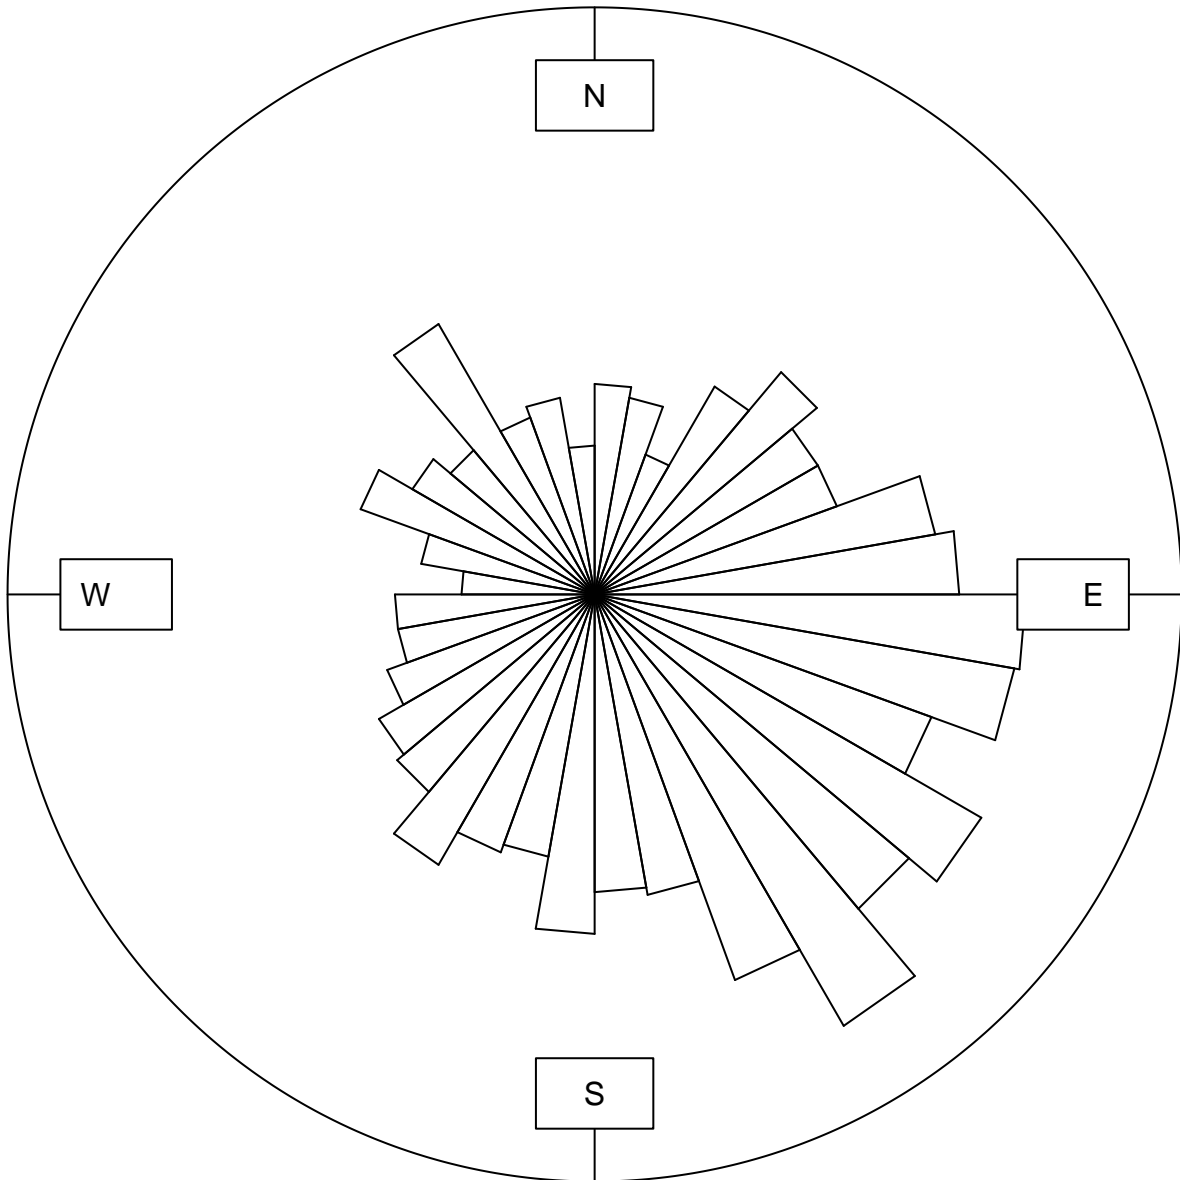

# bootstrap 45

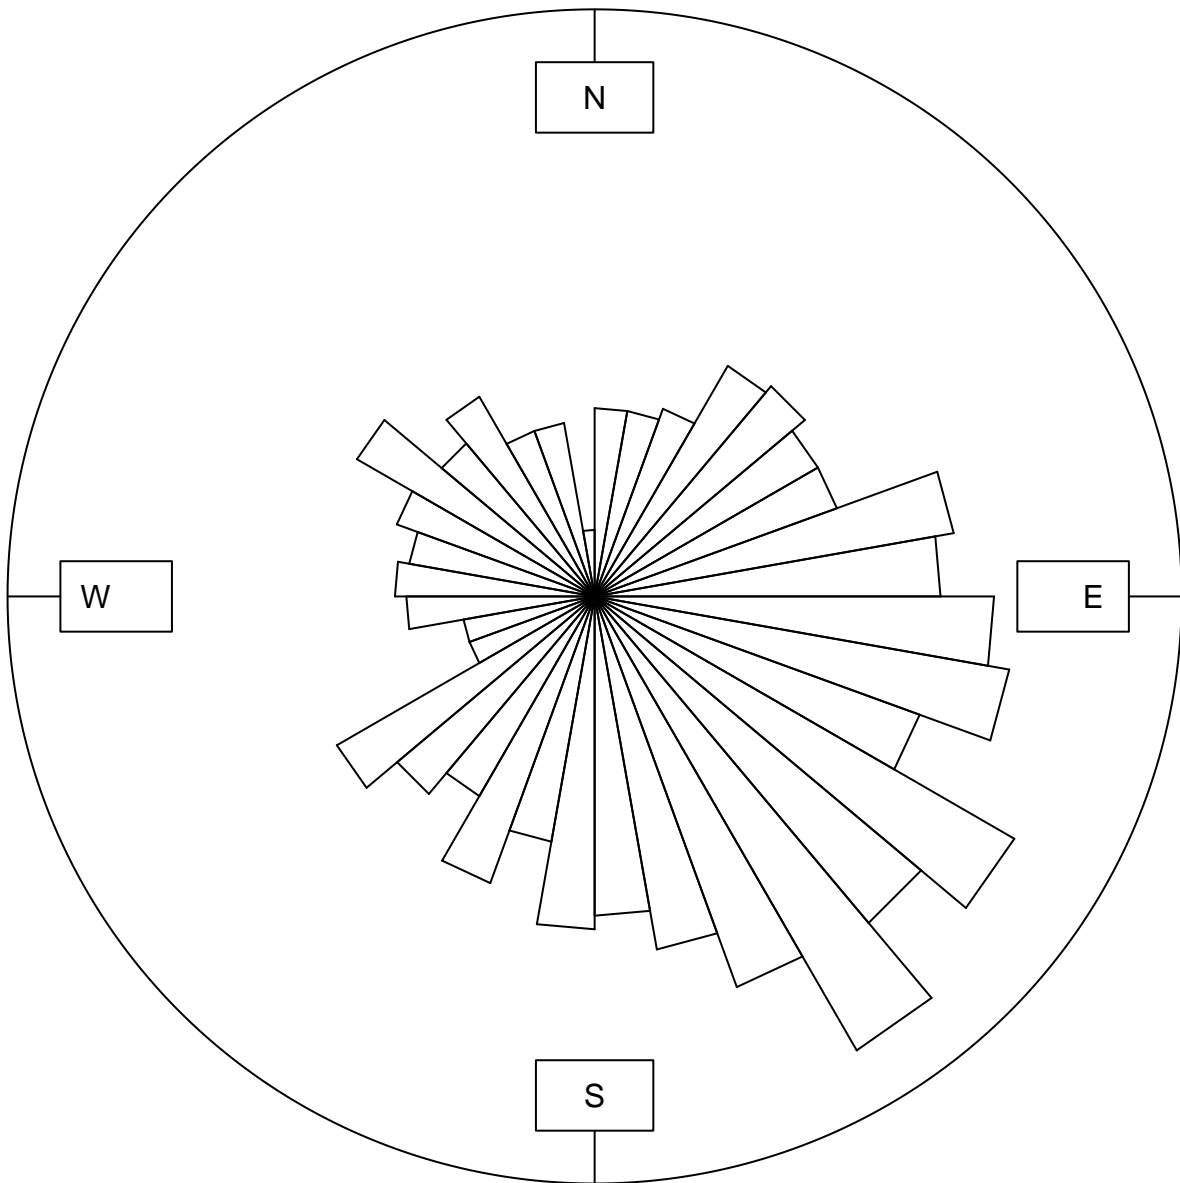

# bootstrap 46

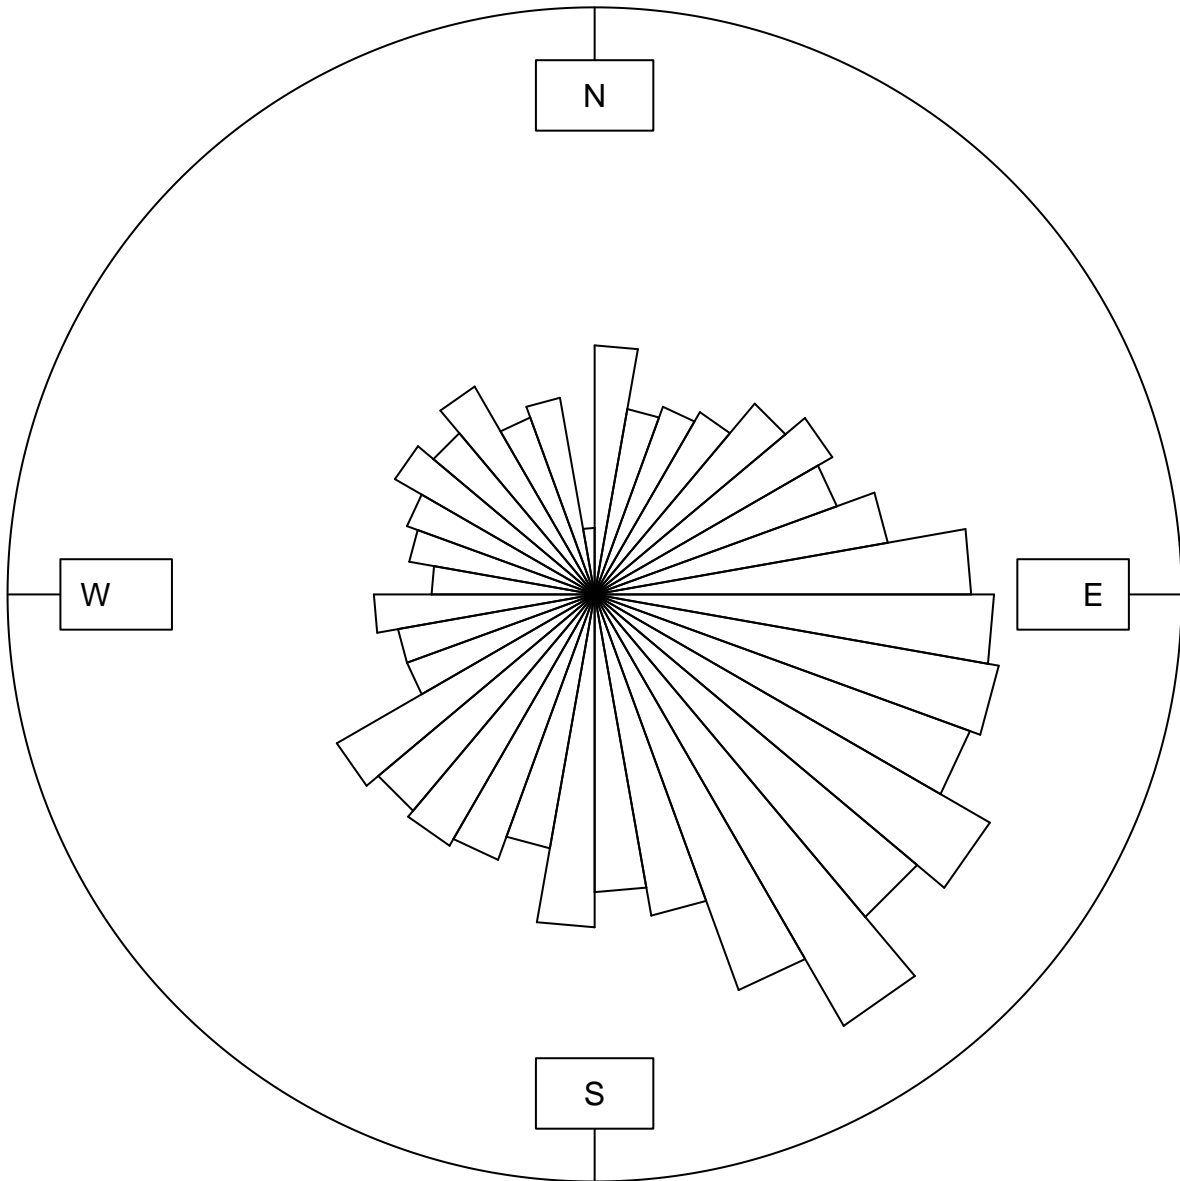

# bootstrap 47

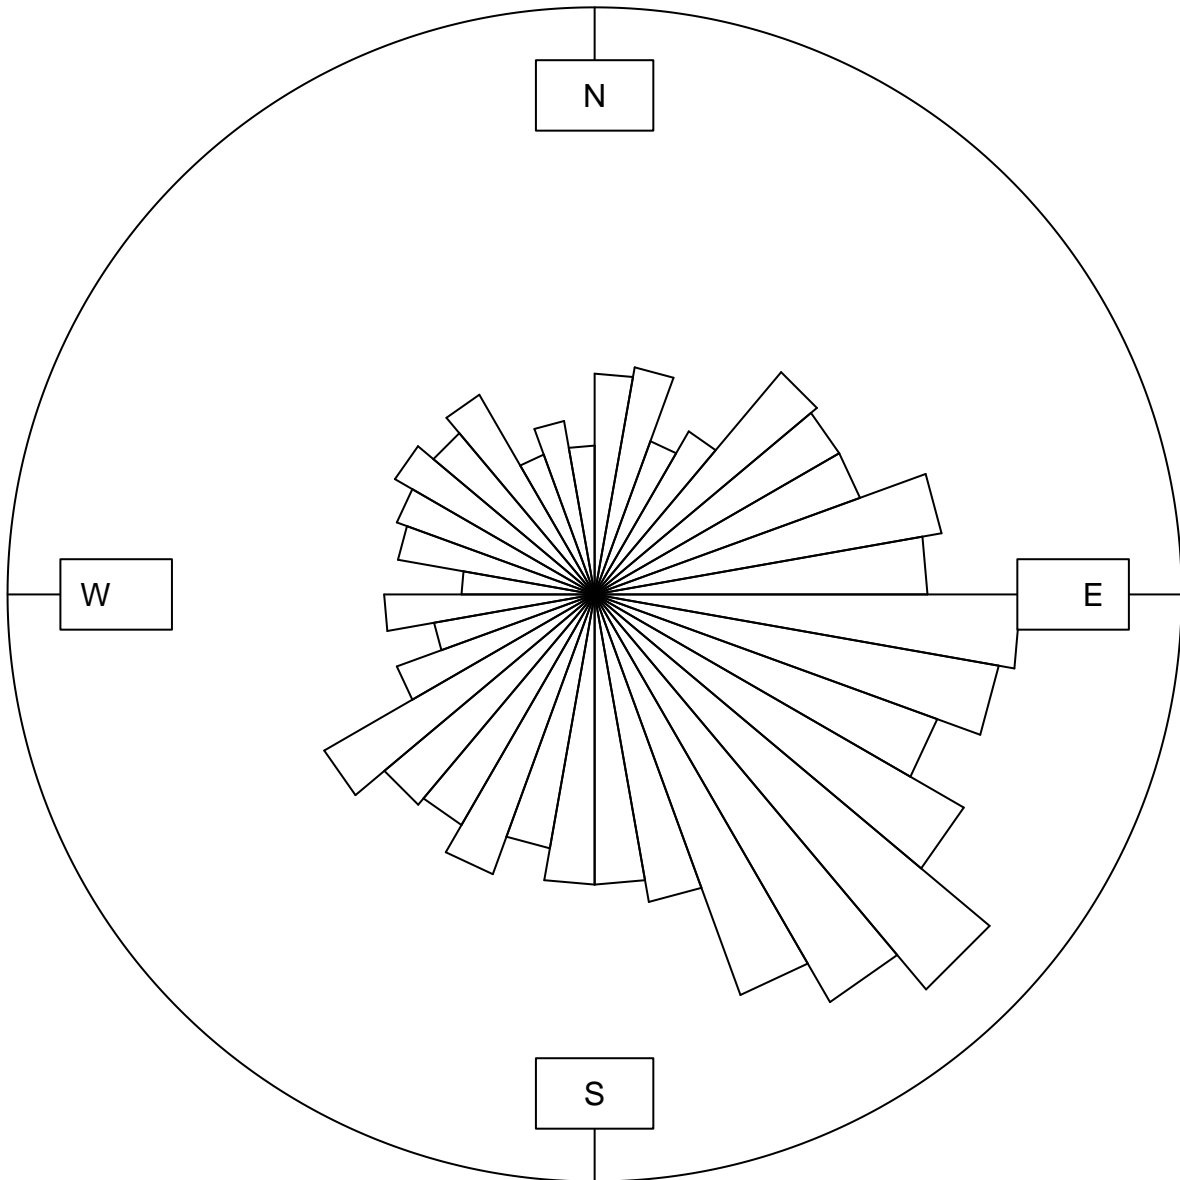

# bootstrap 48

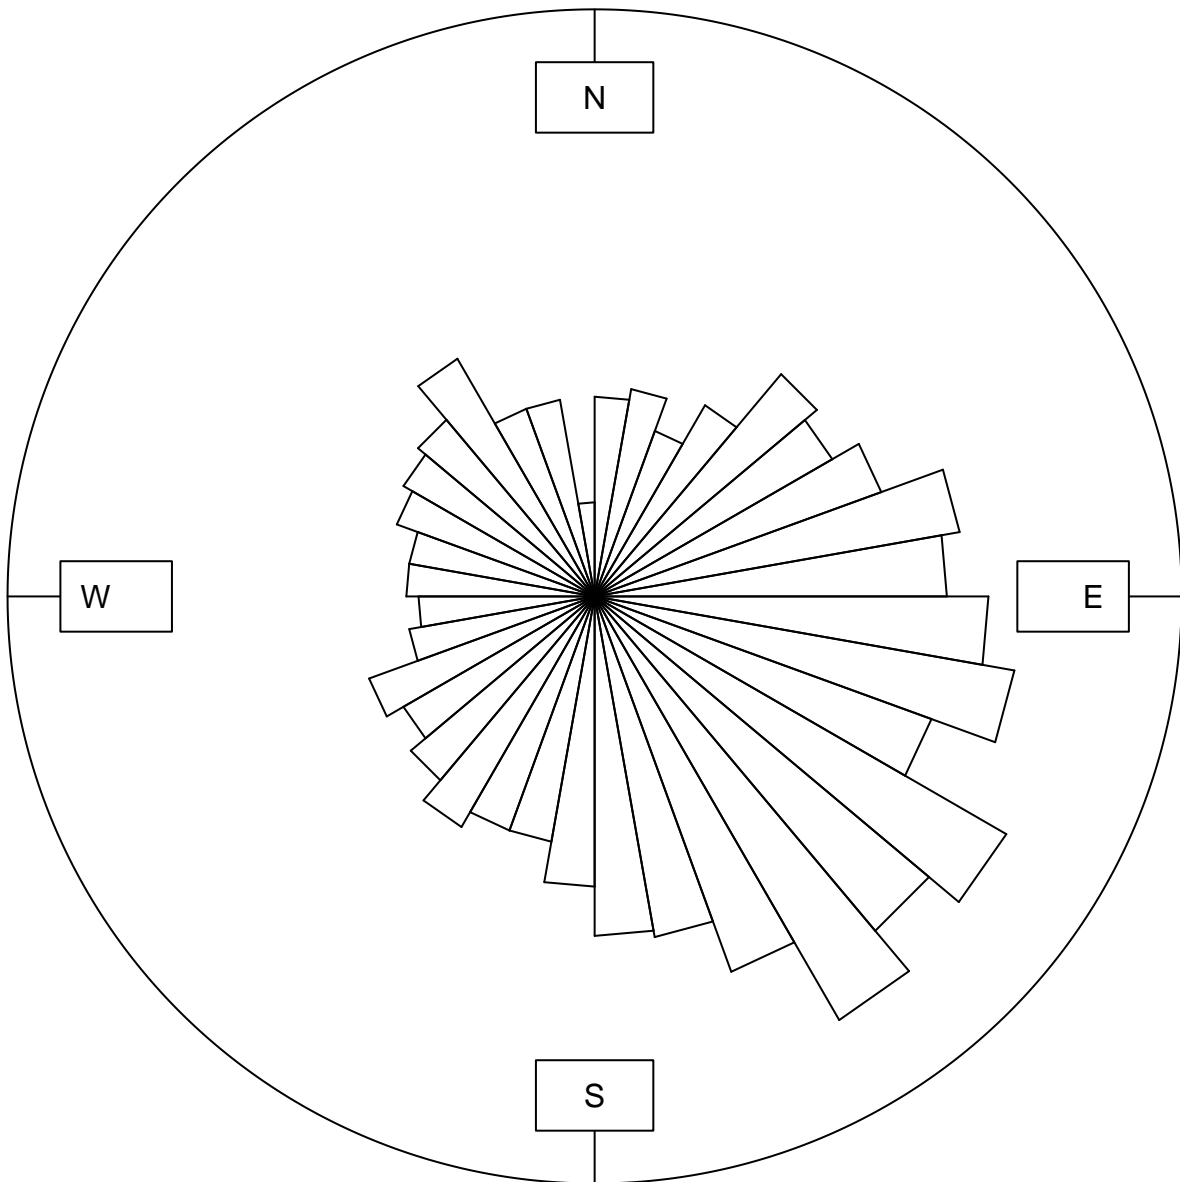



# bootstrap 49

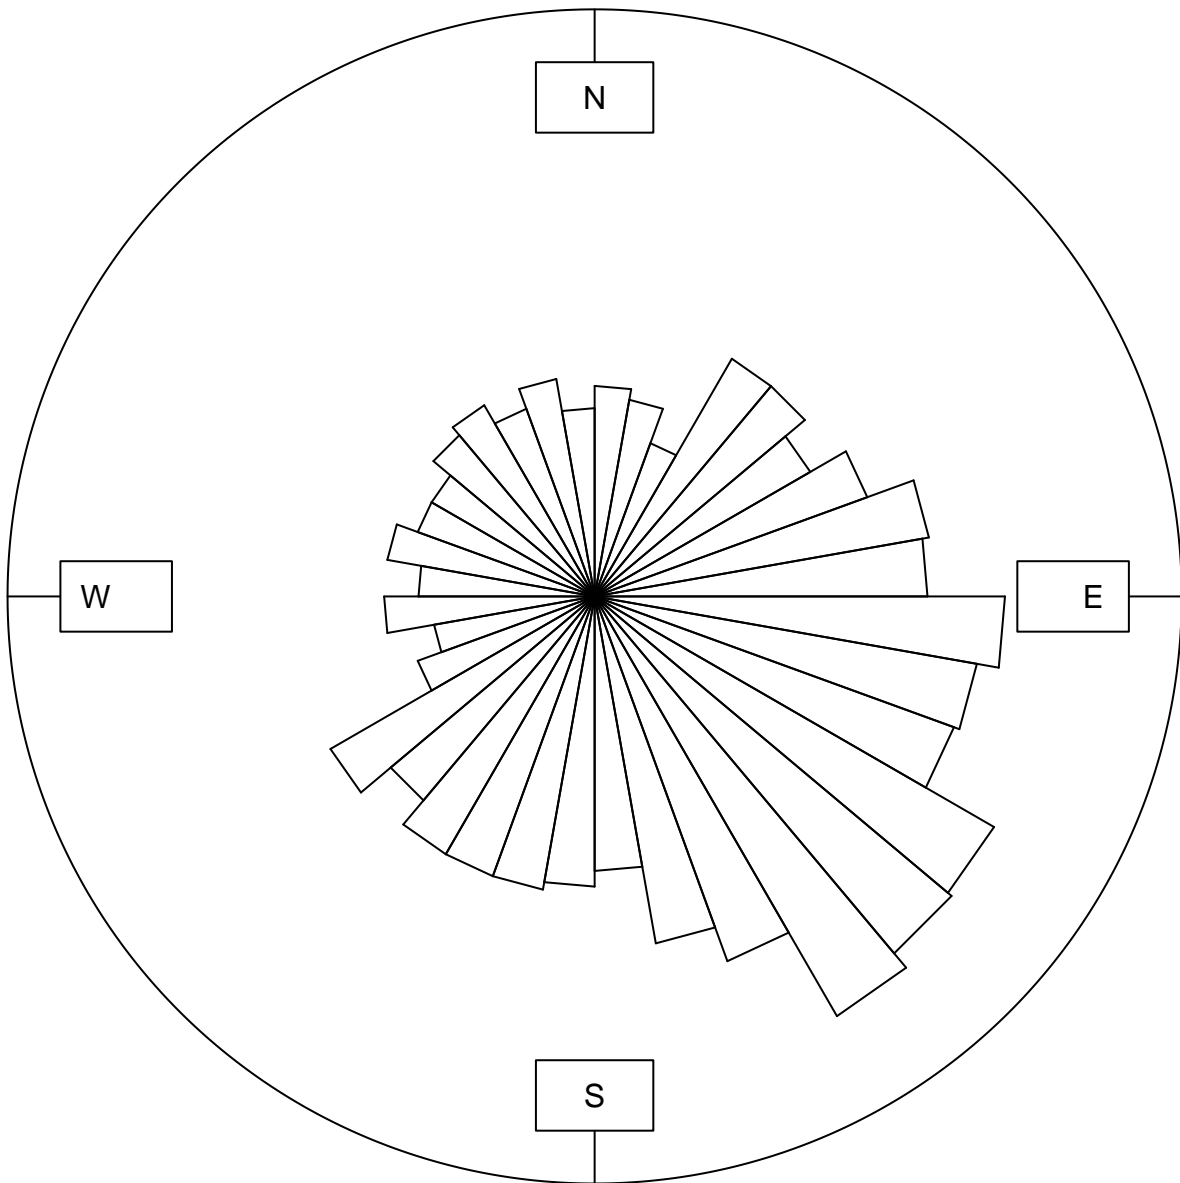

**bootstrap 50**

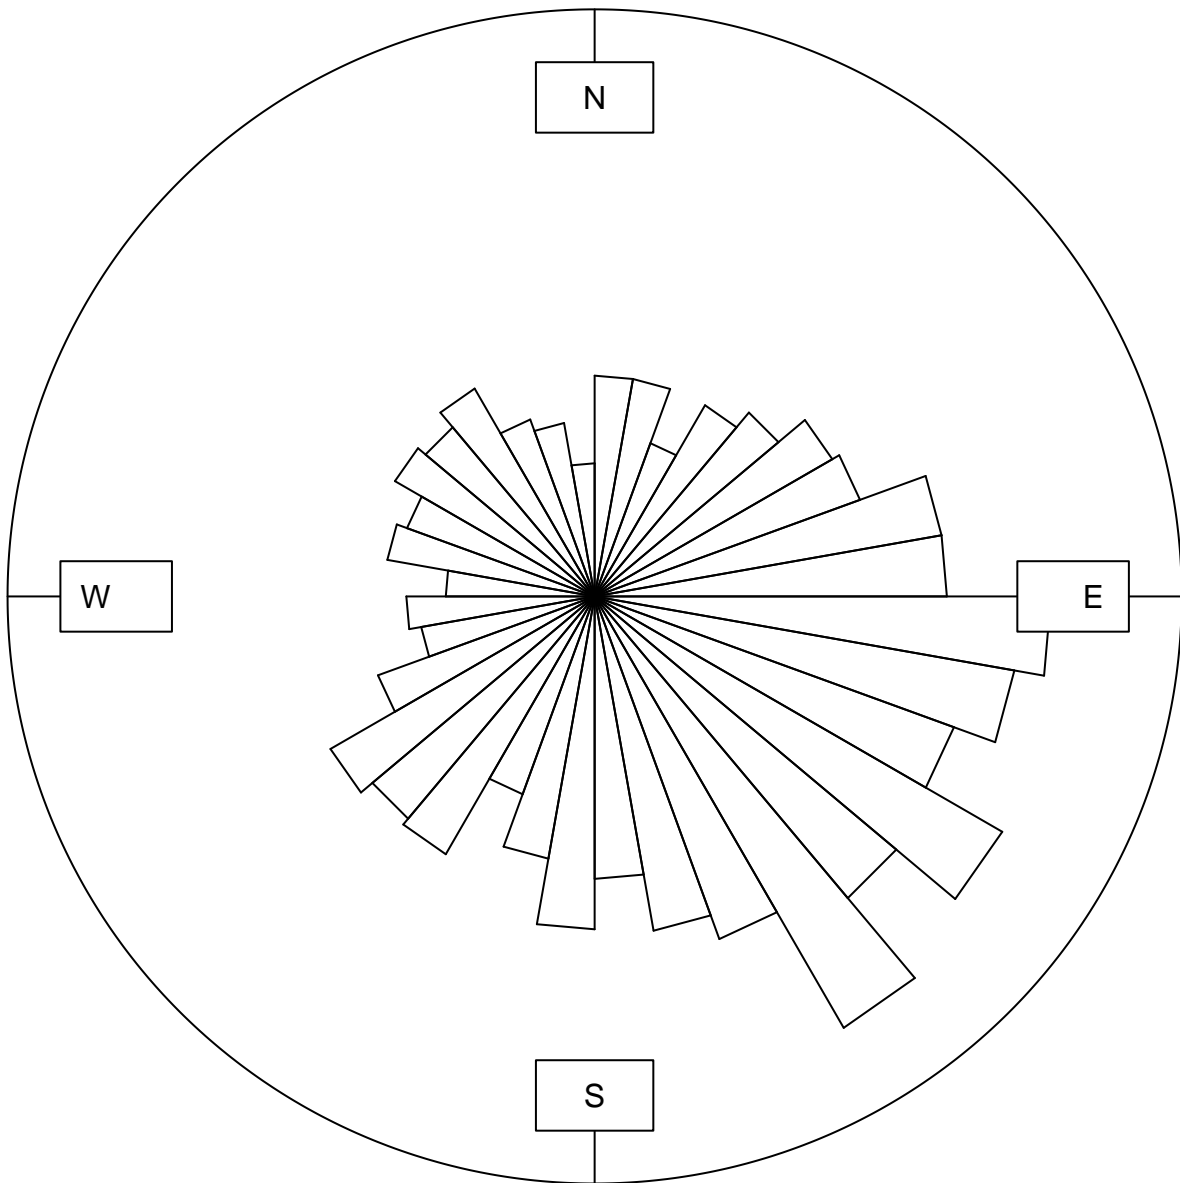

# bootstrap 51

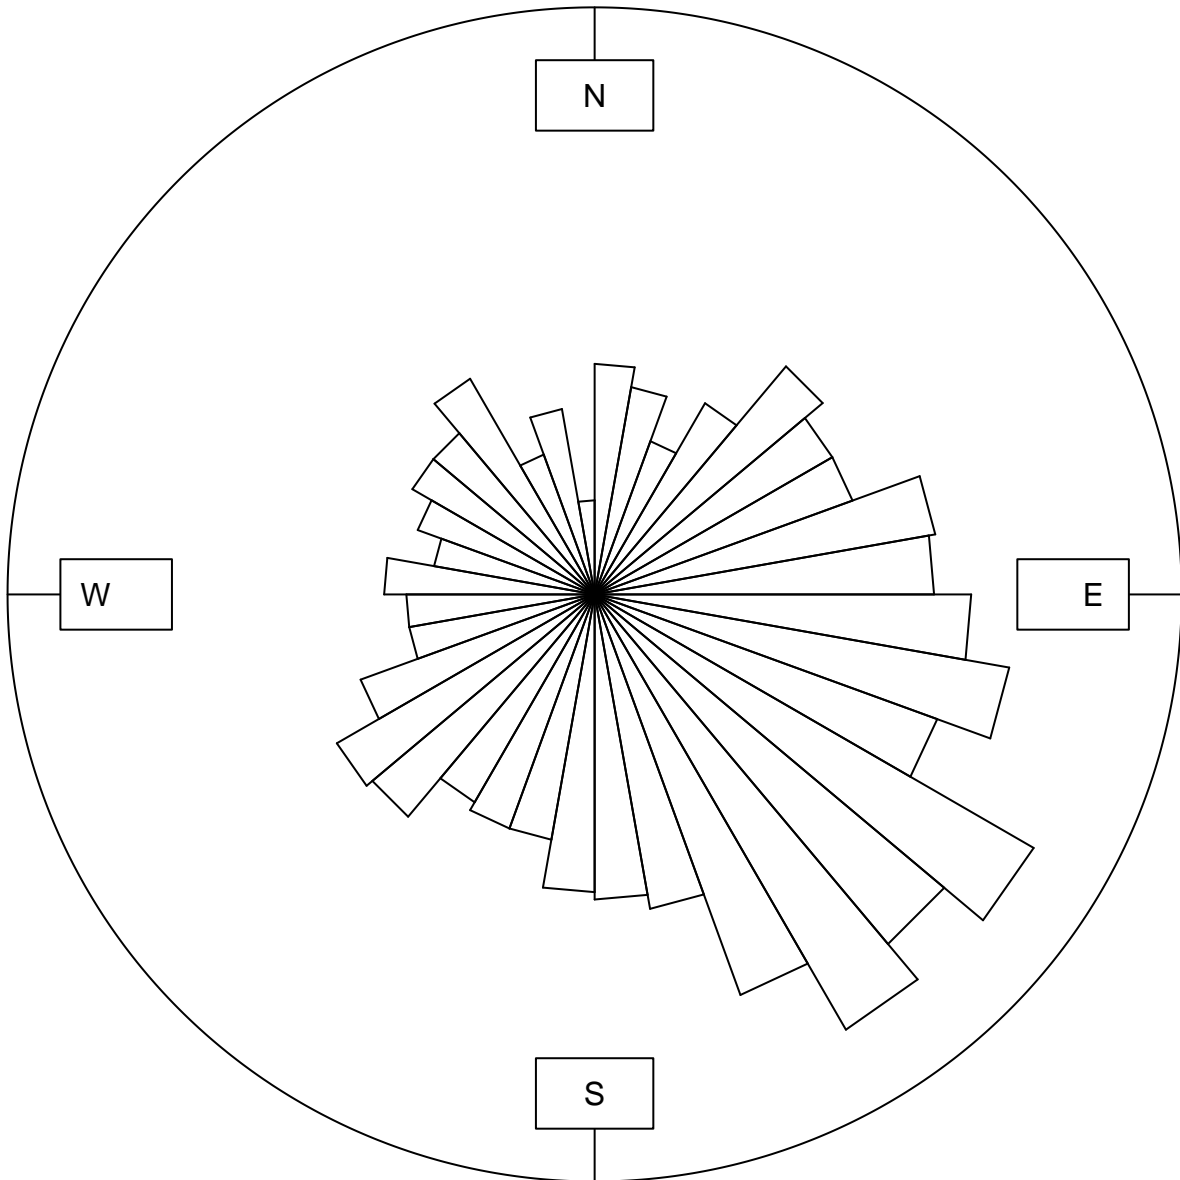

# bootstrap 52

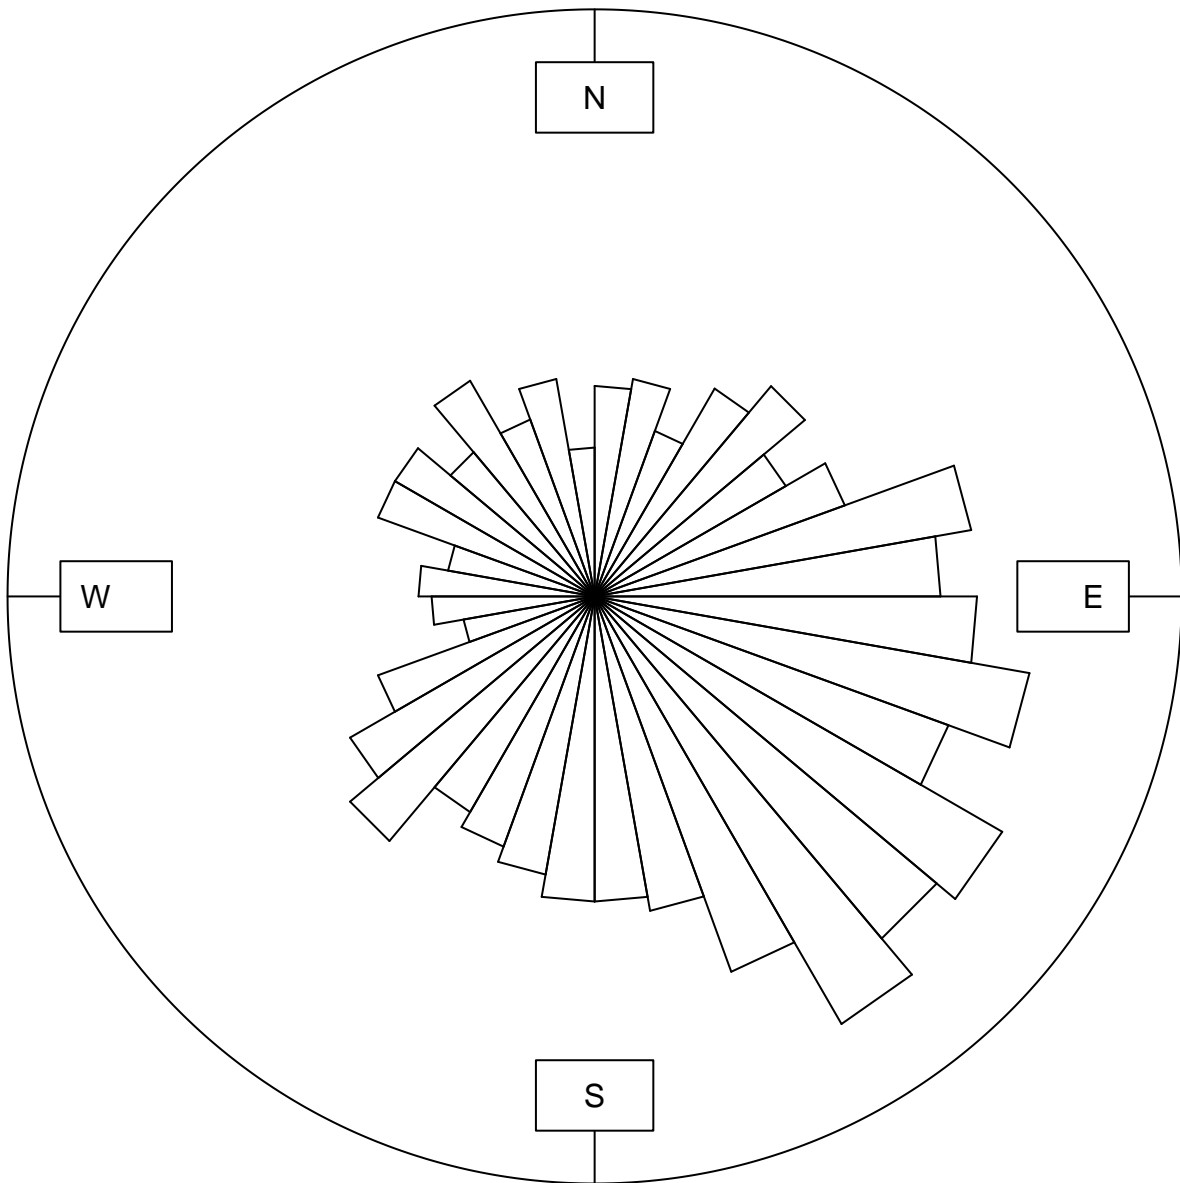

# bootstrap 53

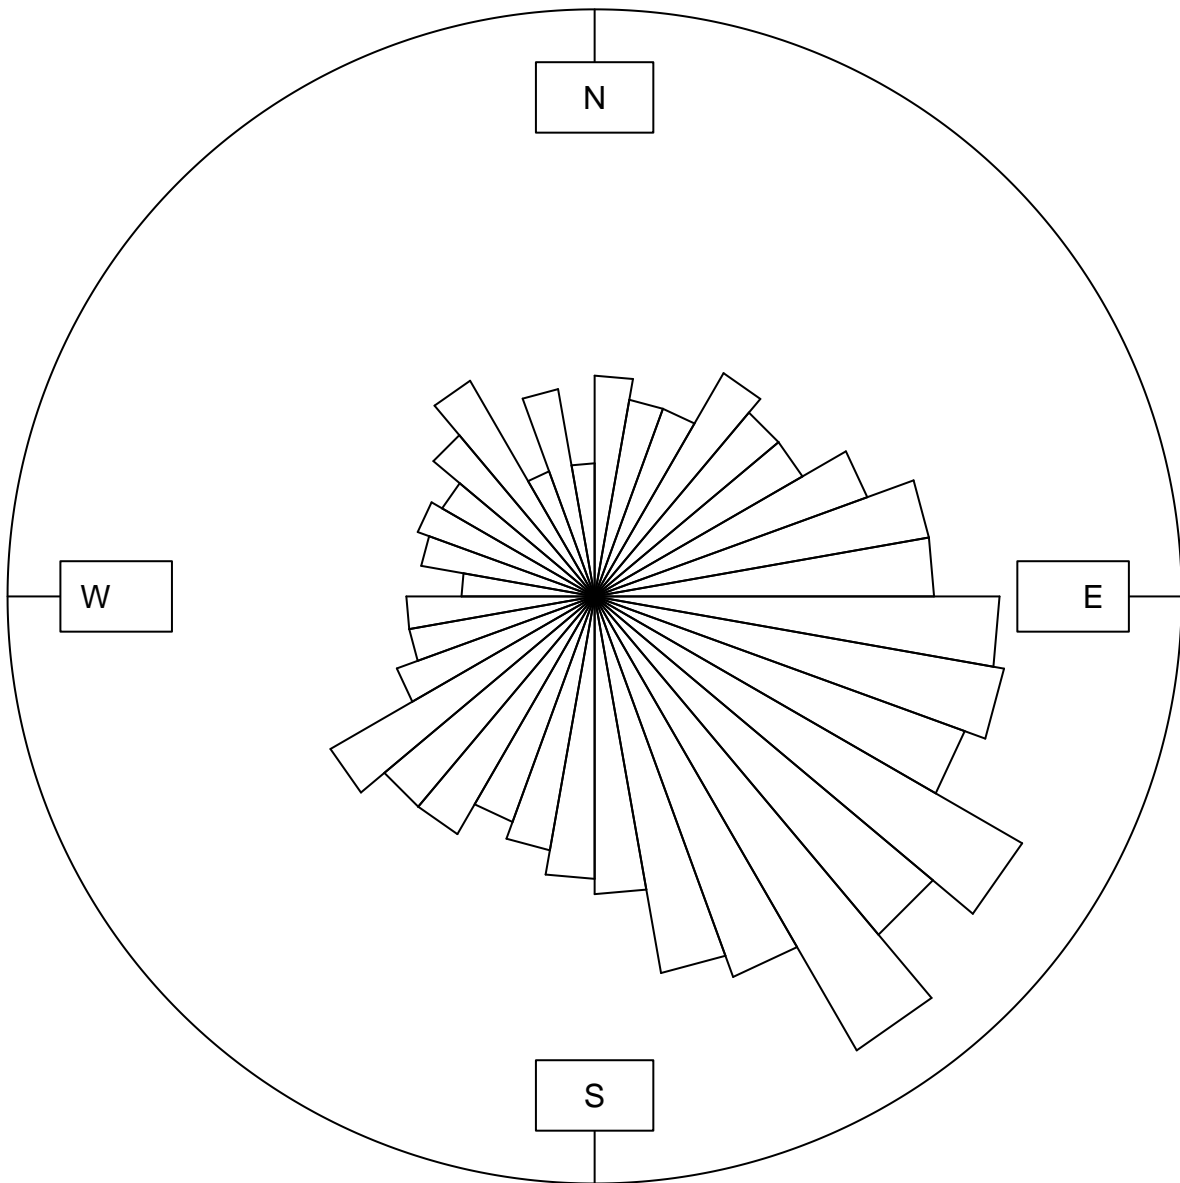

# bootstrap 54

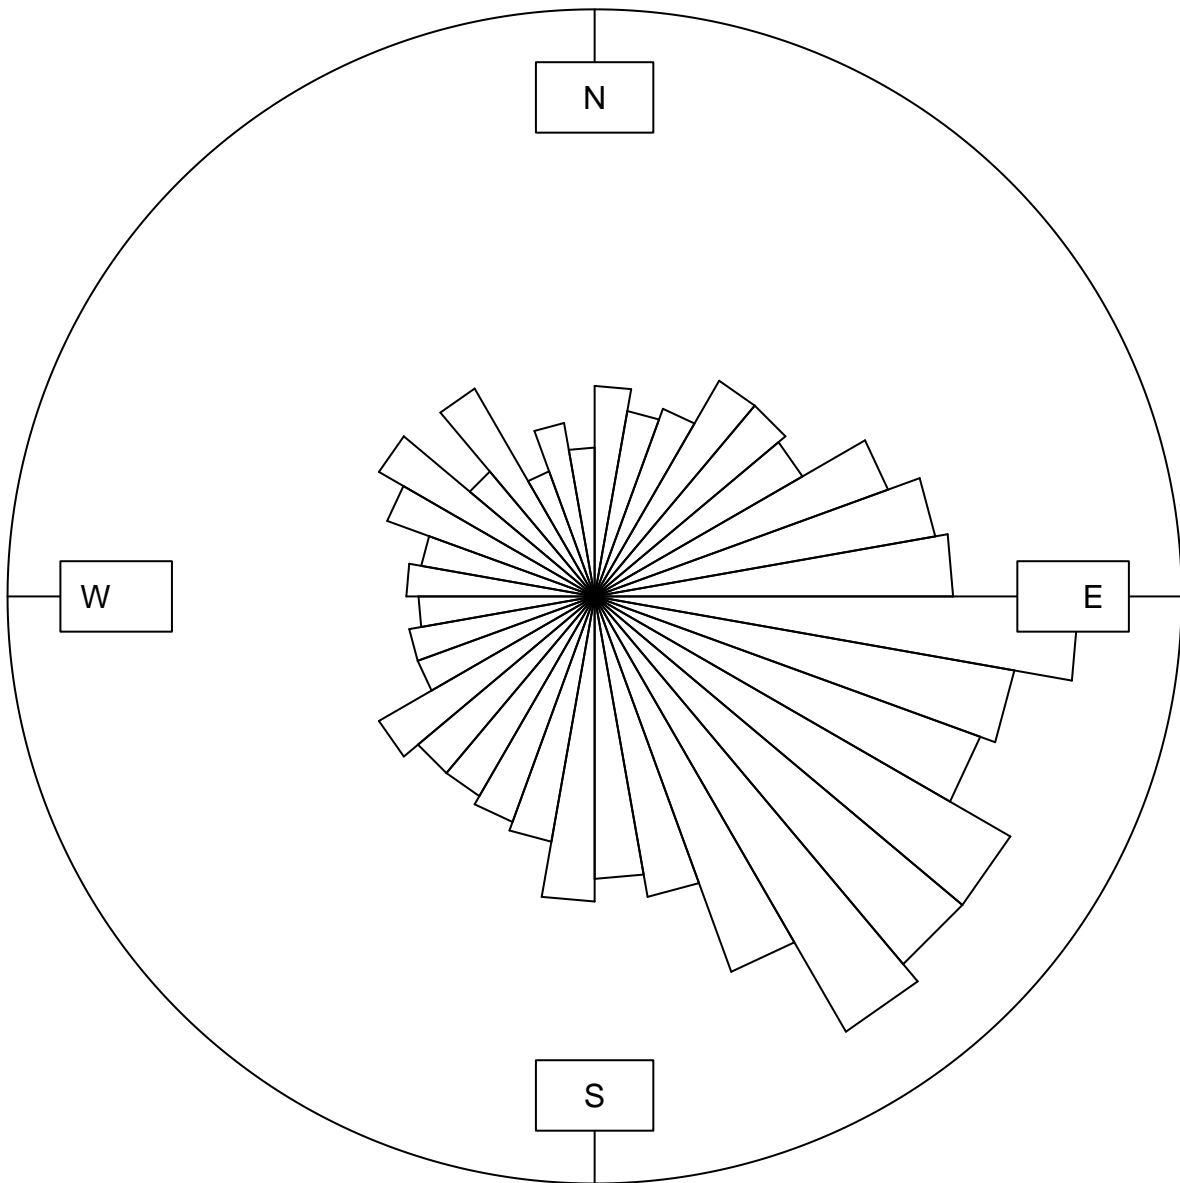

# bootstrap 55

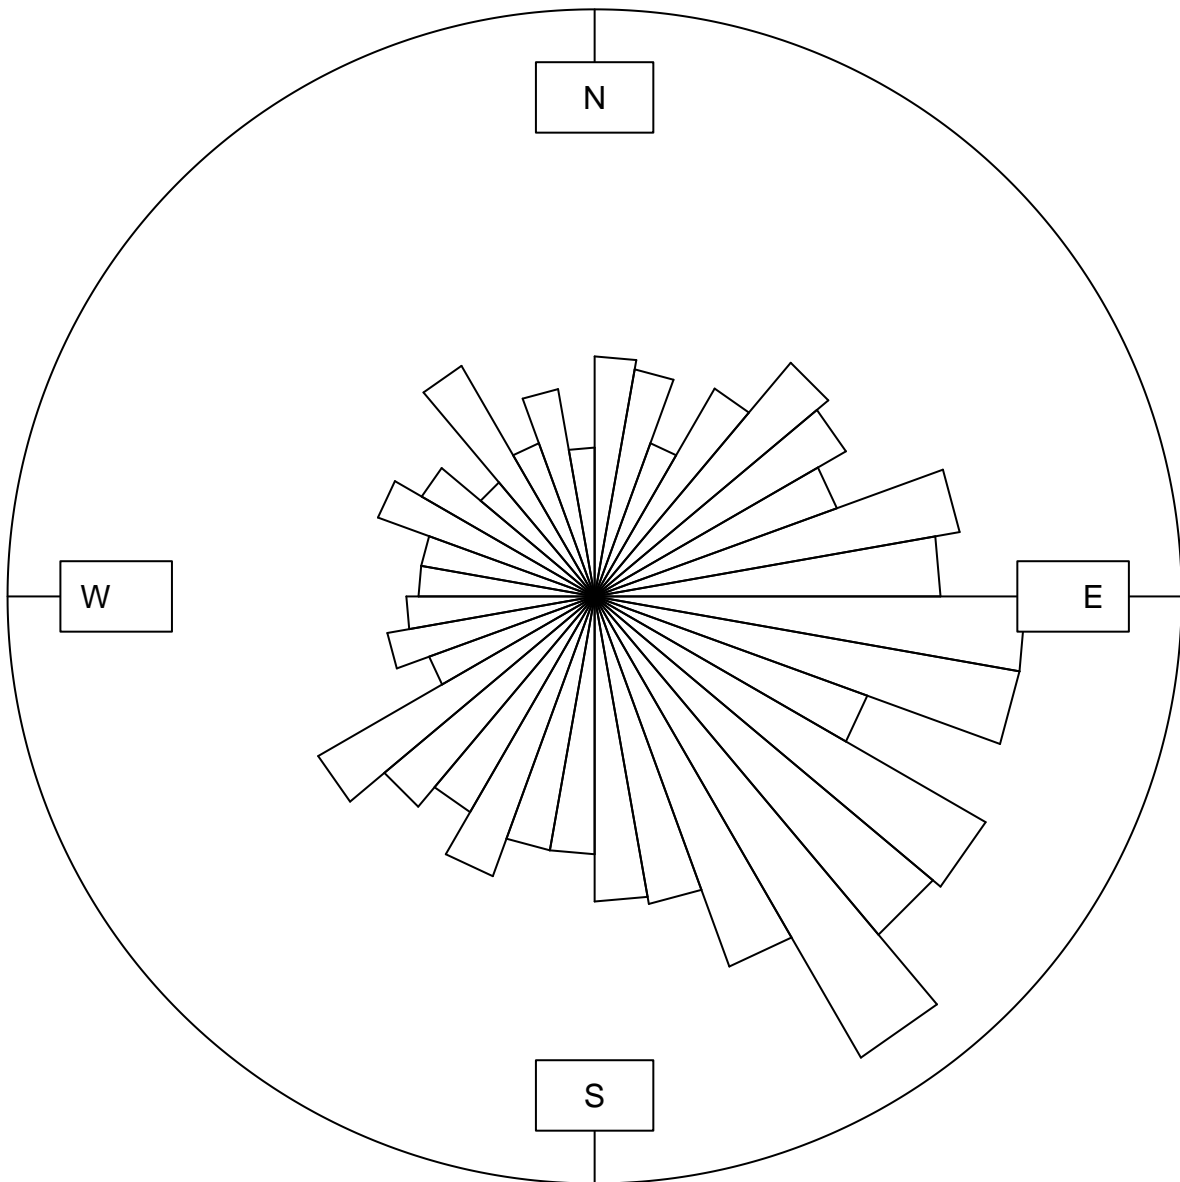

# bootstrap 56

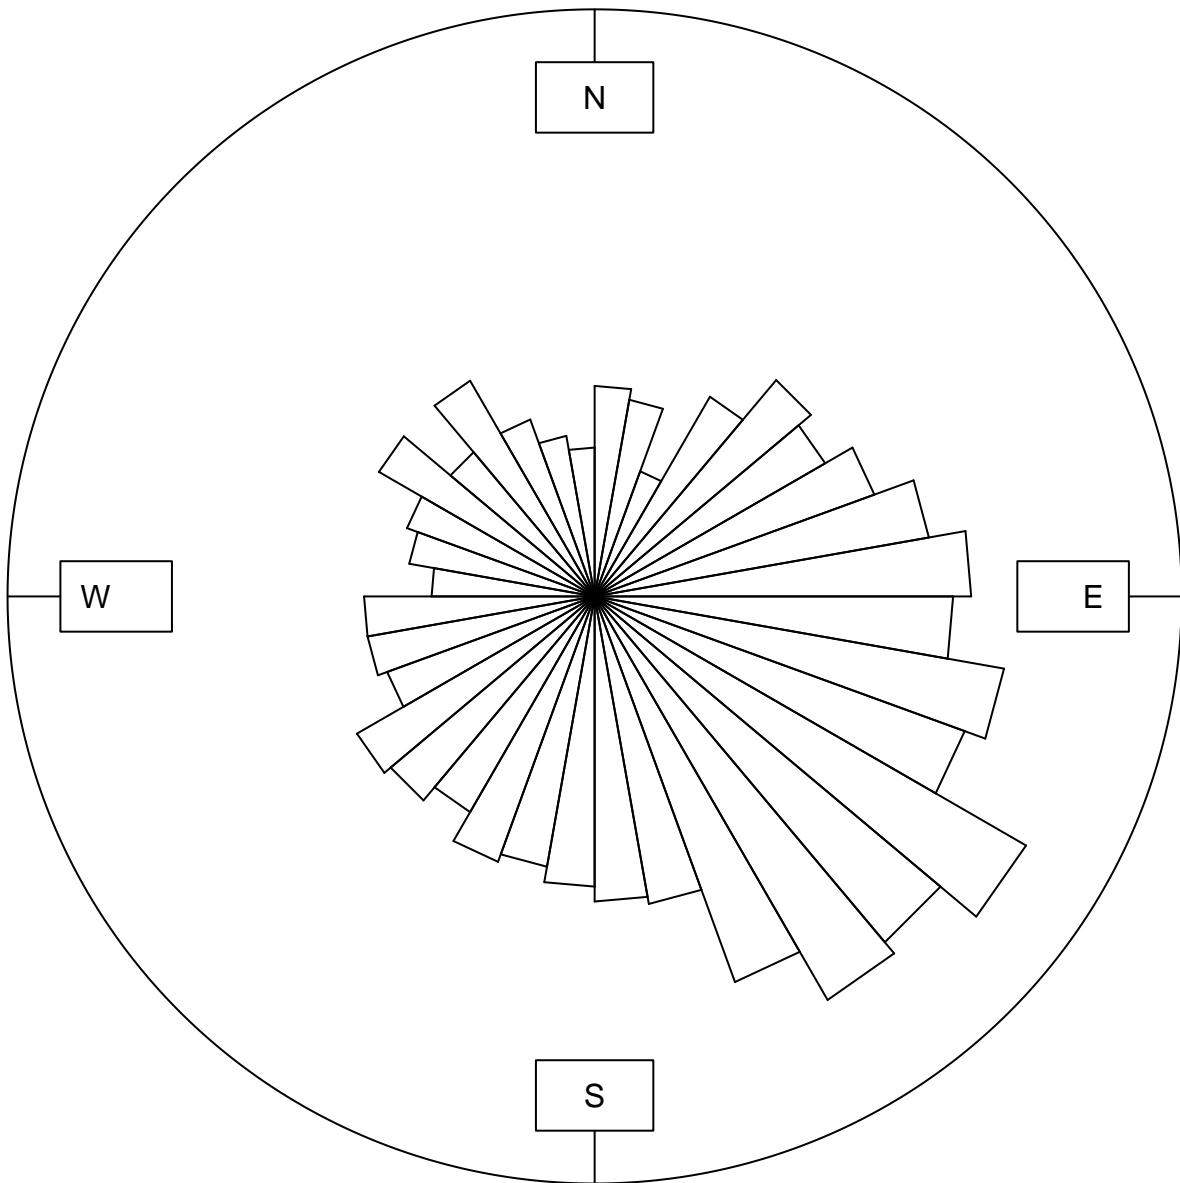



# bootstrap 57

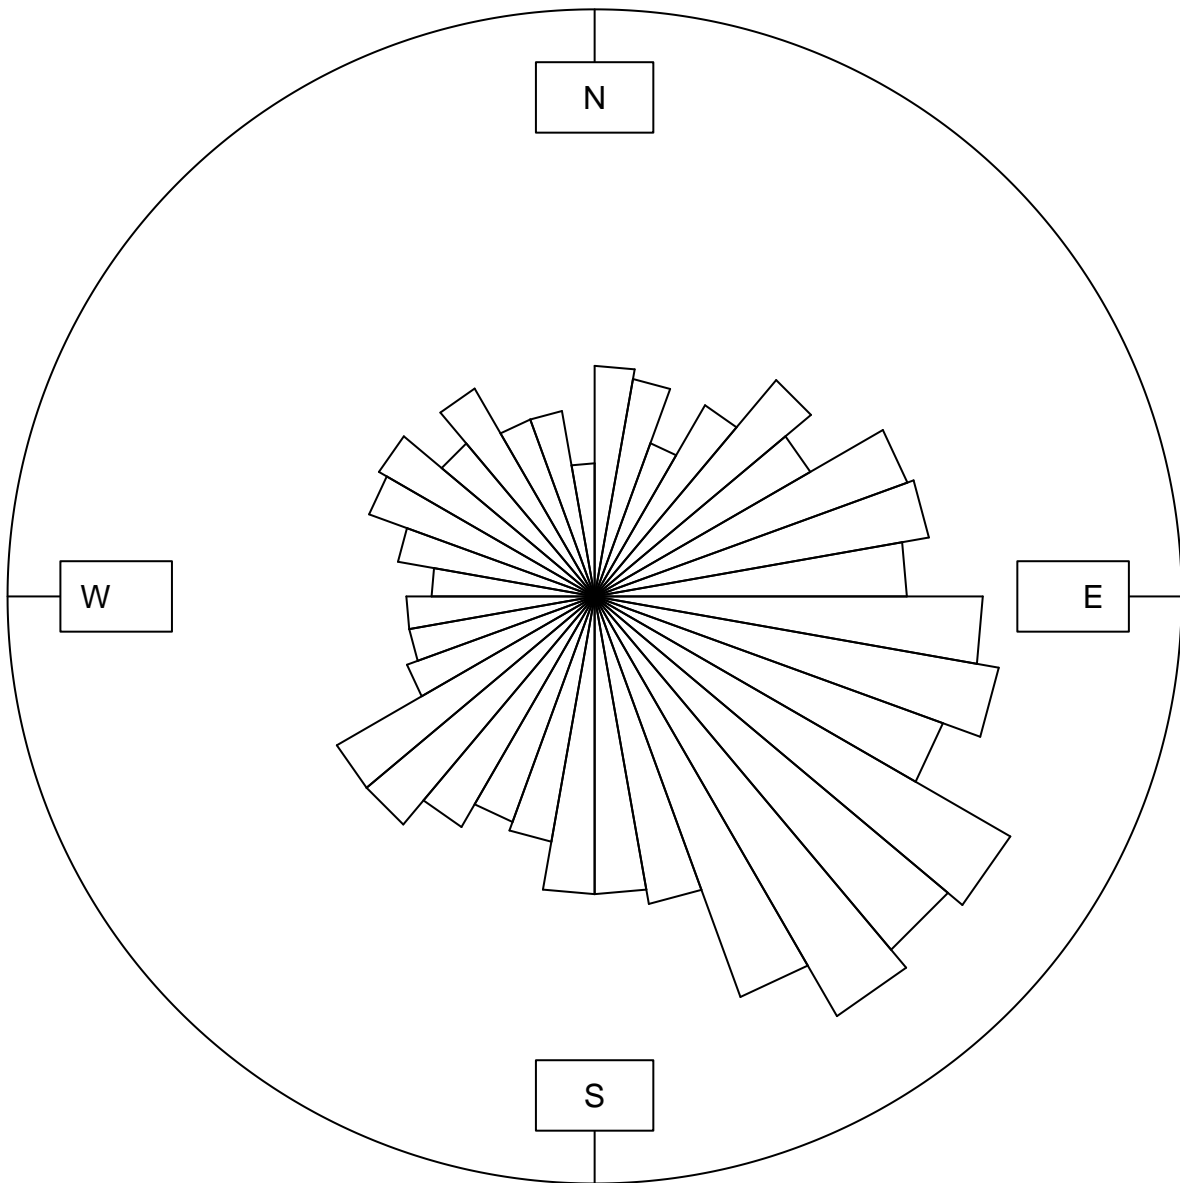

# bootstrap 58

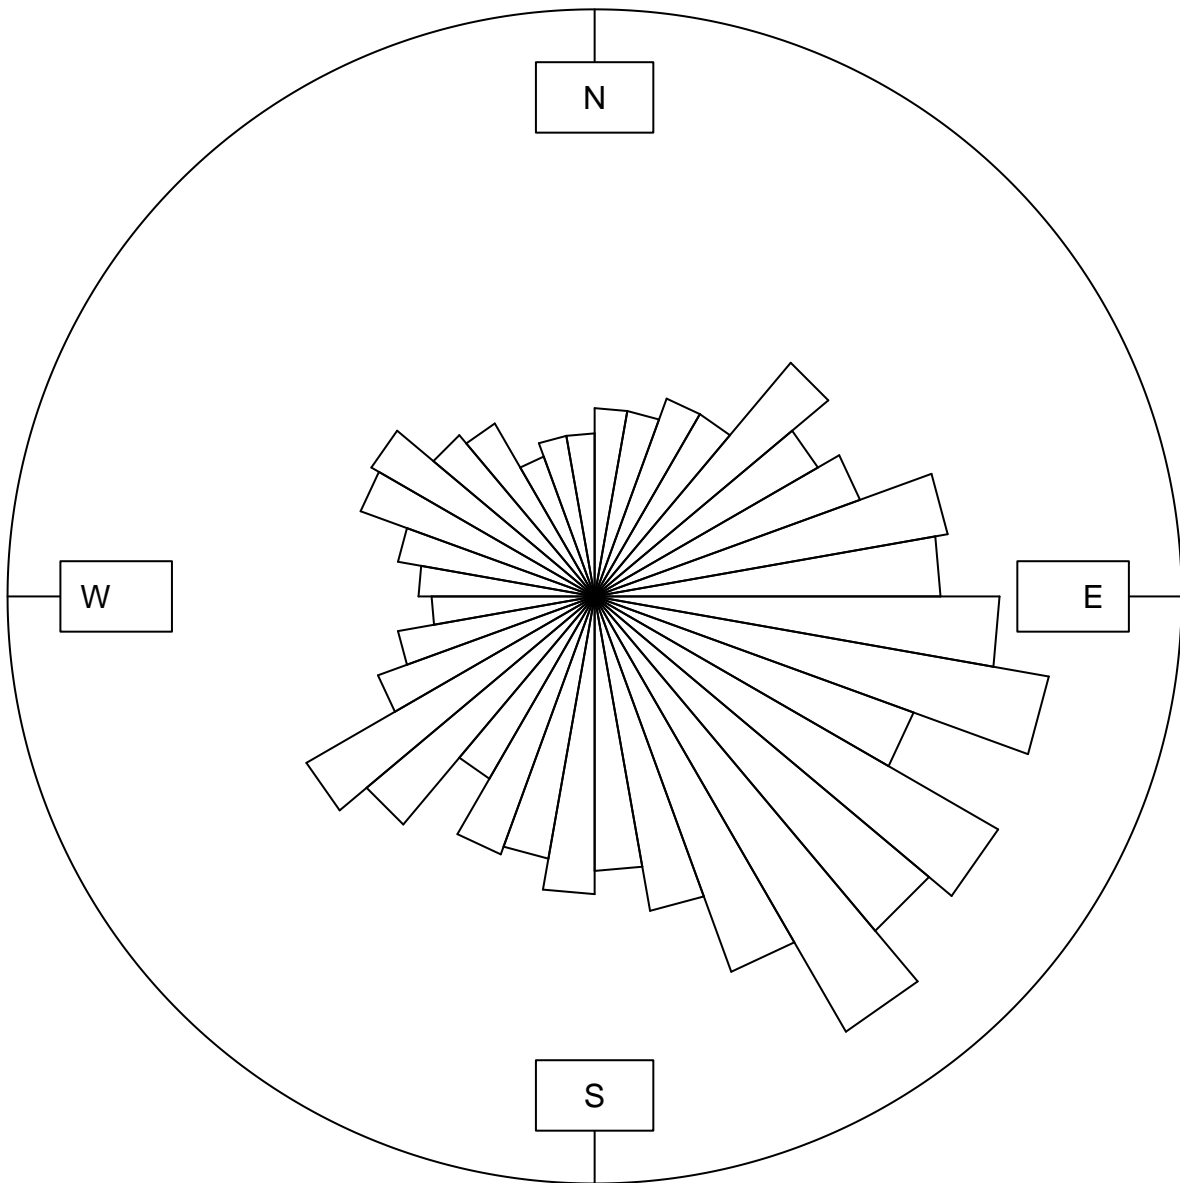

# bootstrap 59

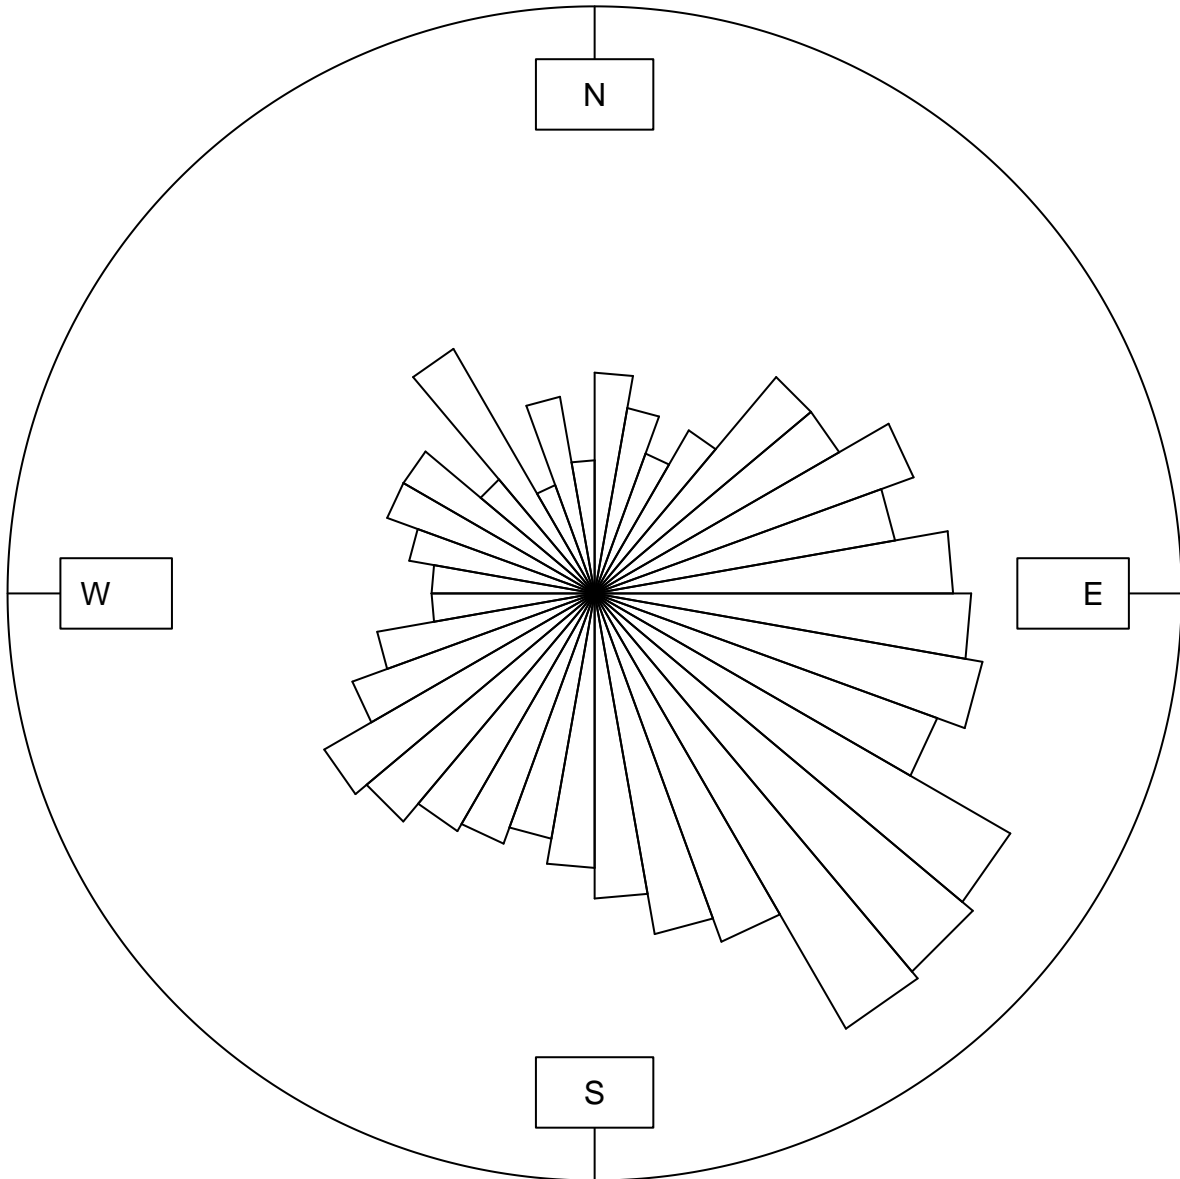

# bootstrap 60

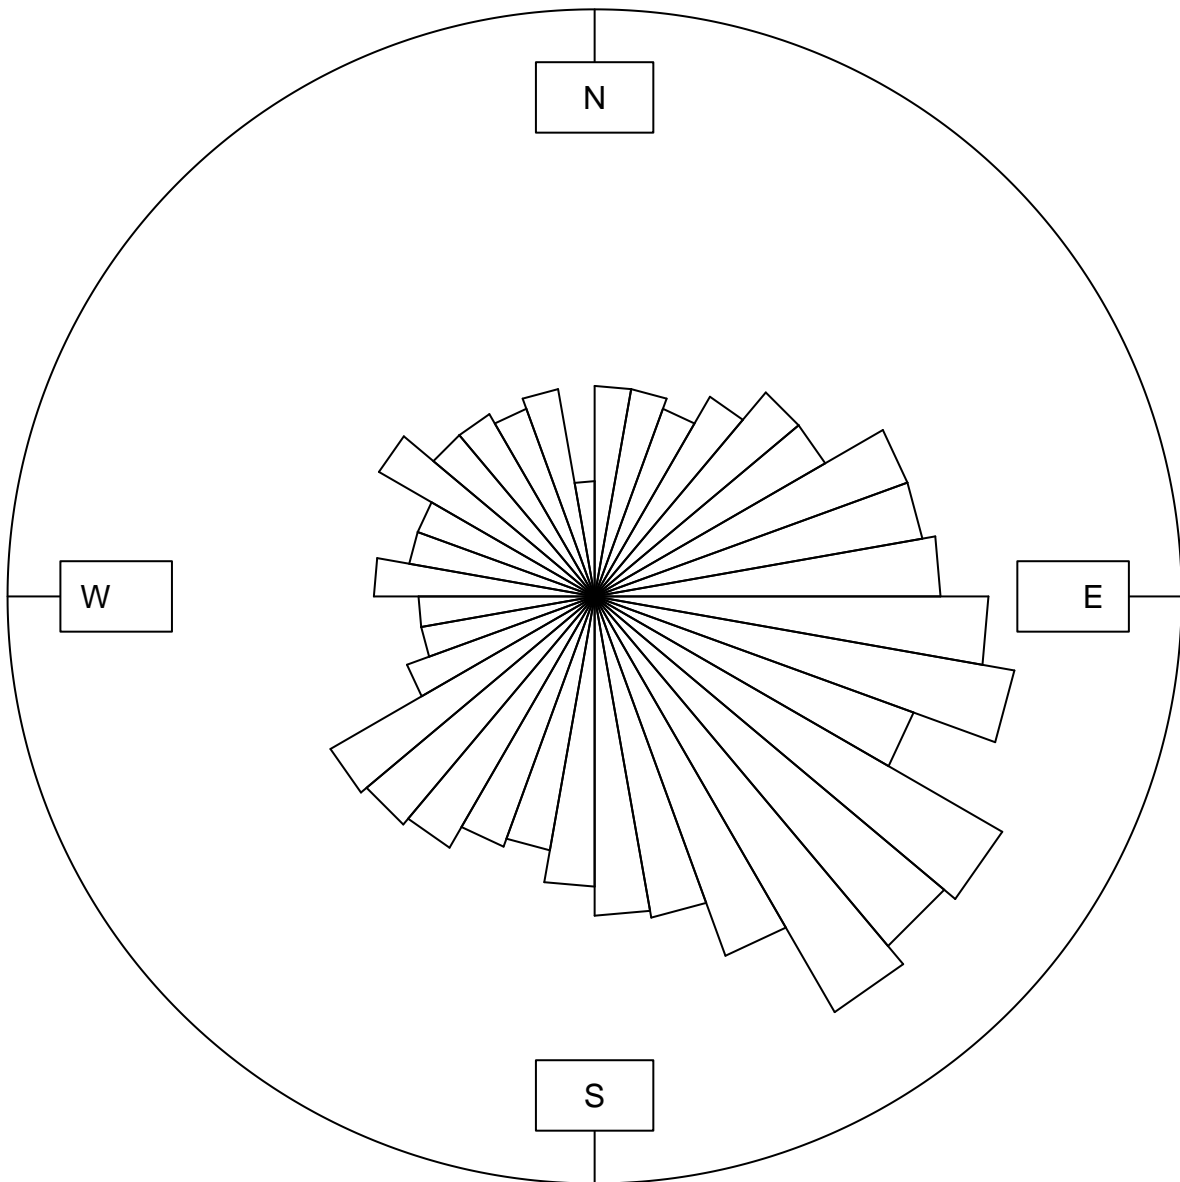

# bootstrap 61

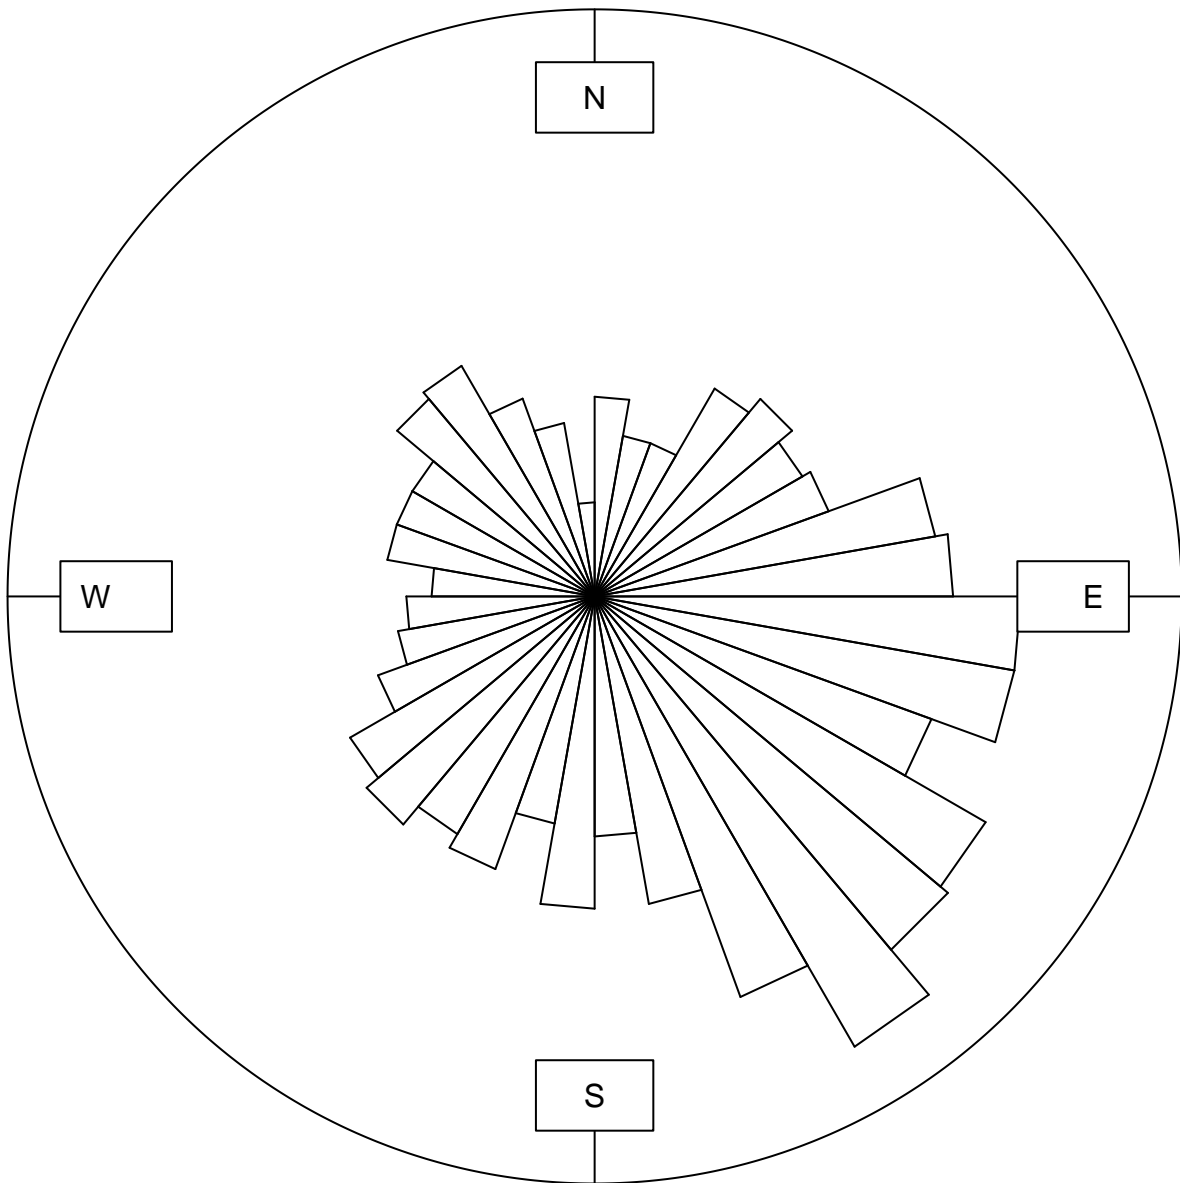

# bootstrap 62

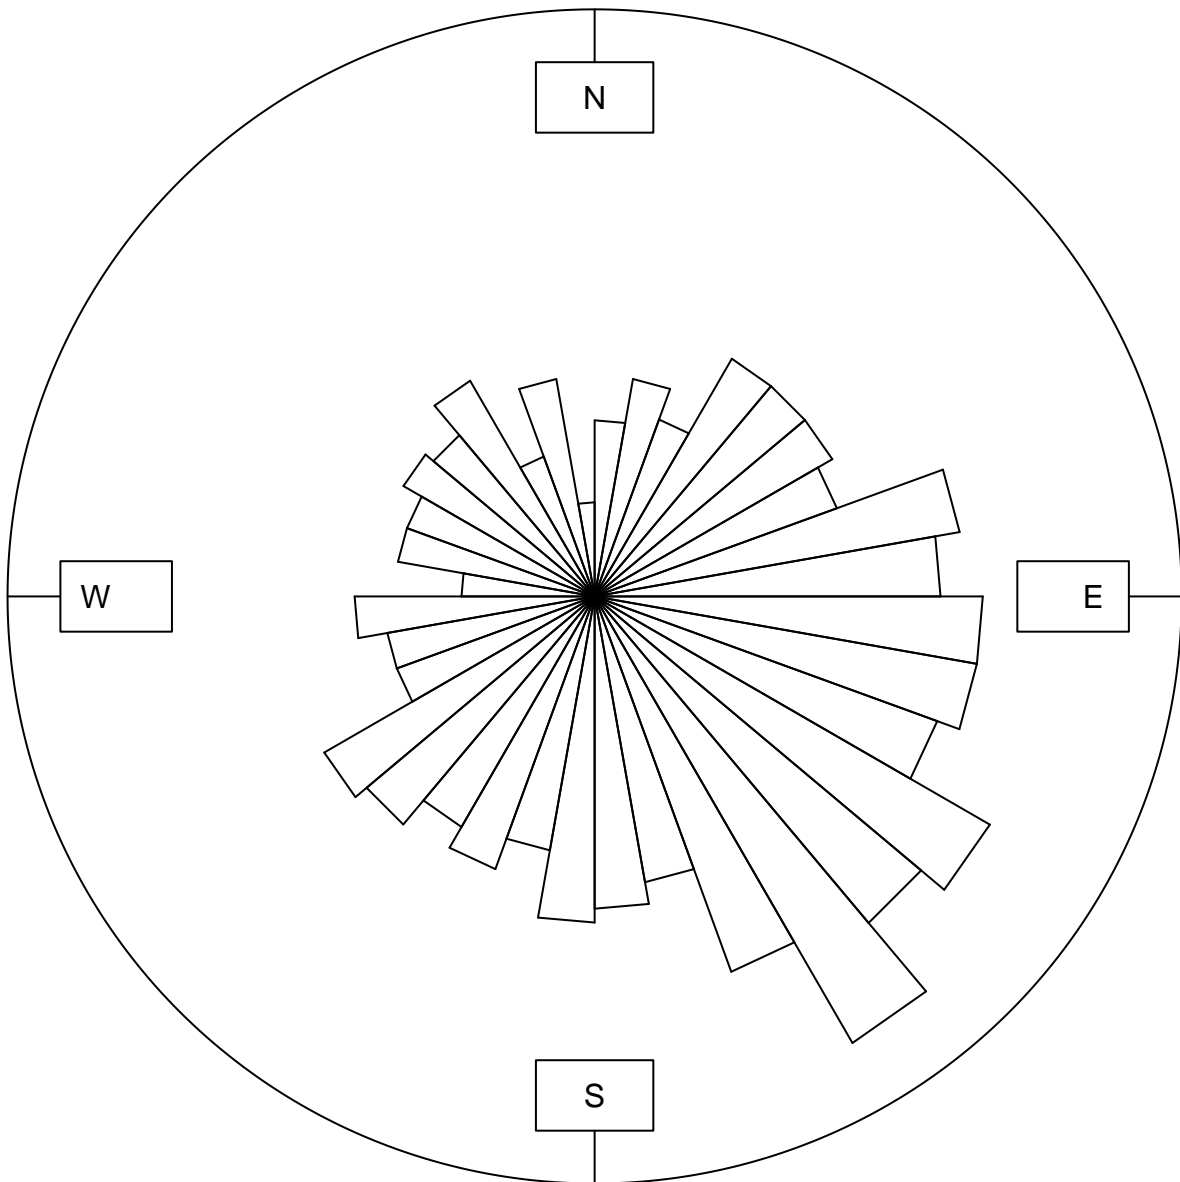

# bootstrap 63

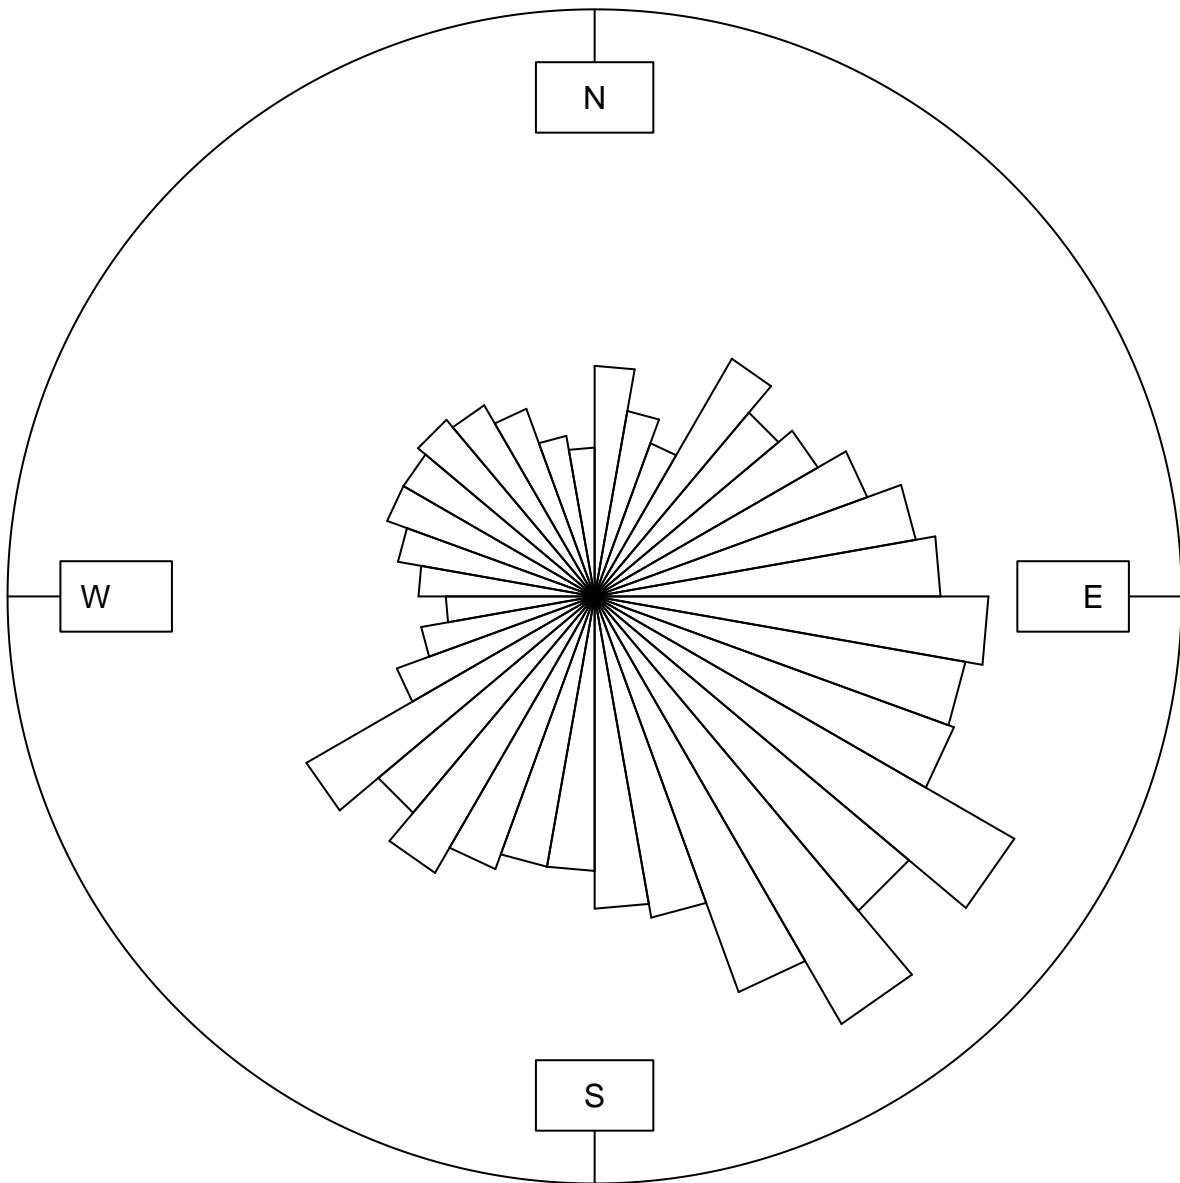

# bootstrap 64

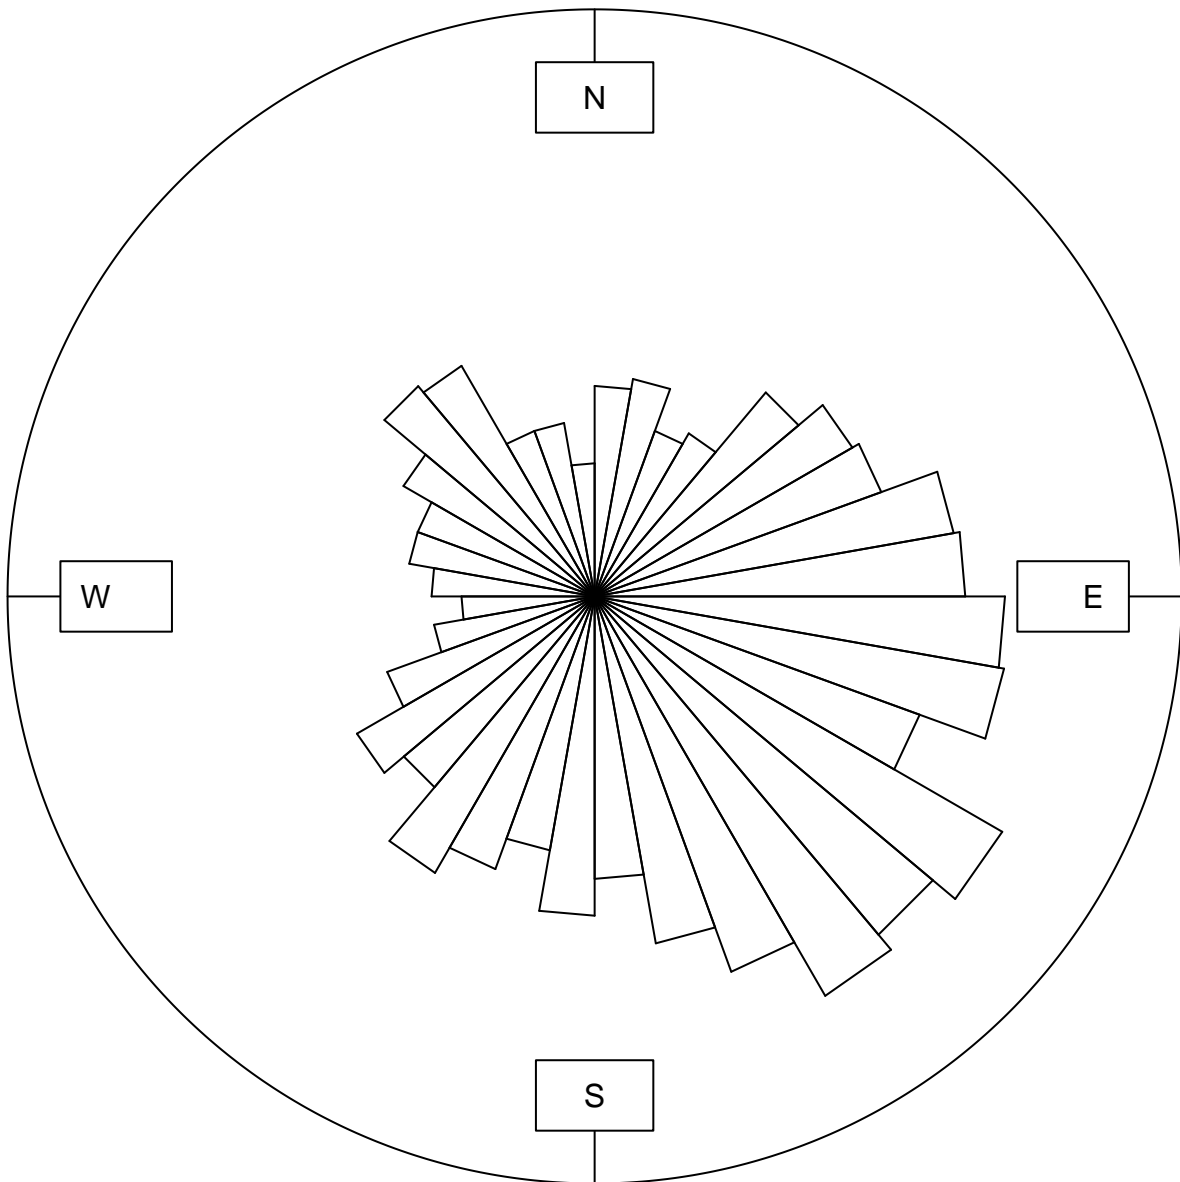



# bootstrap 65

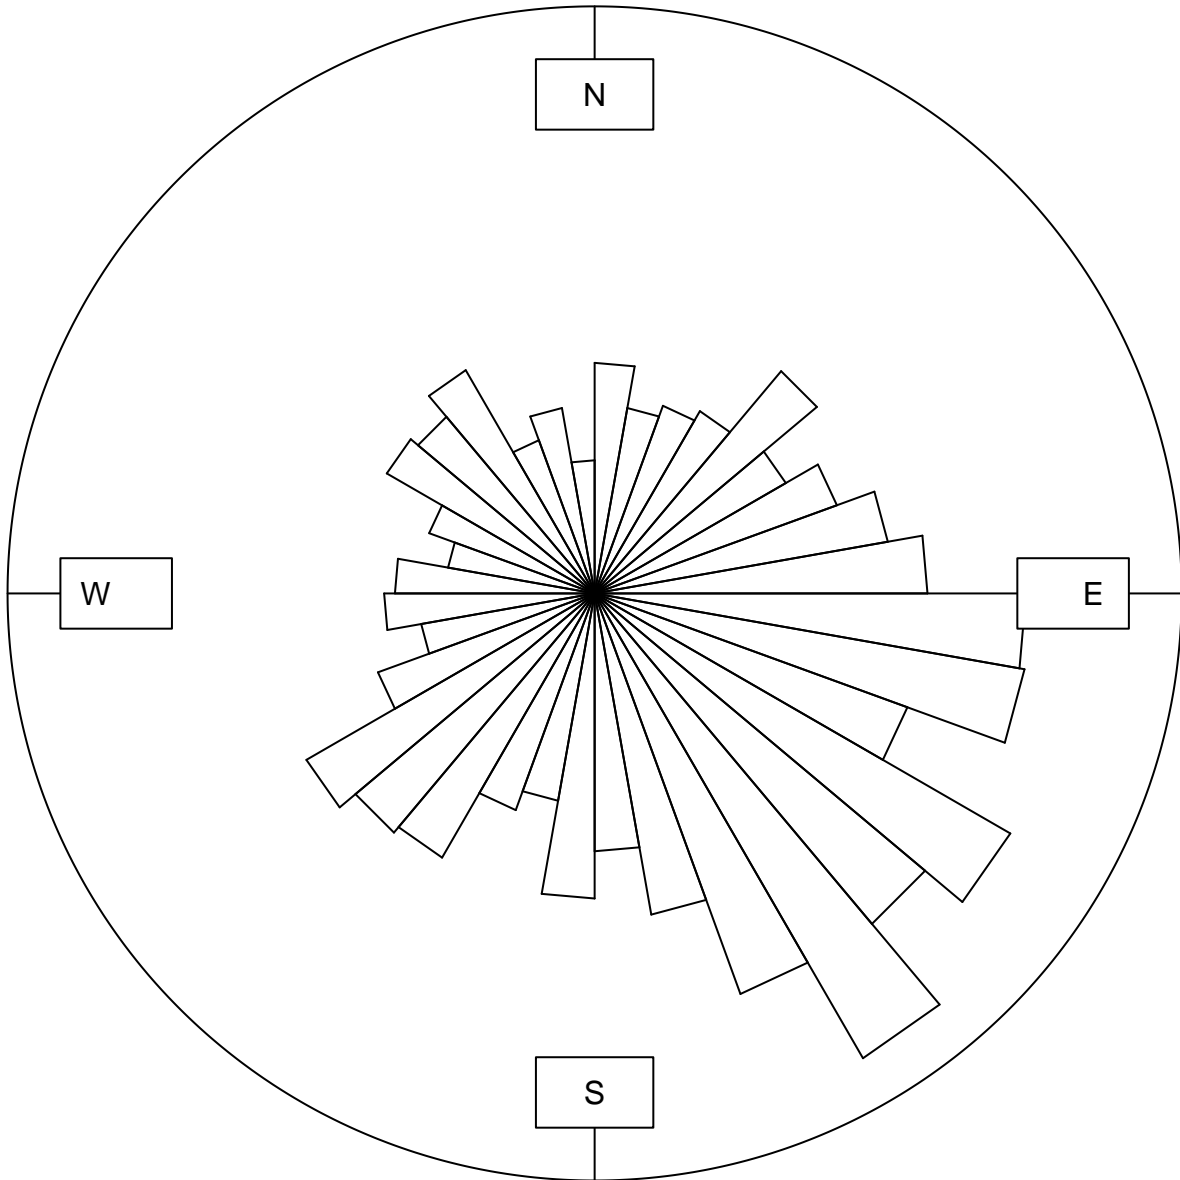

# bootstrap 66

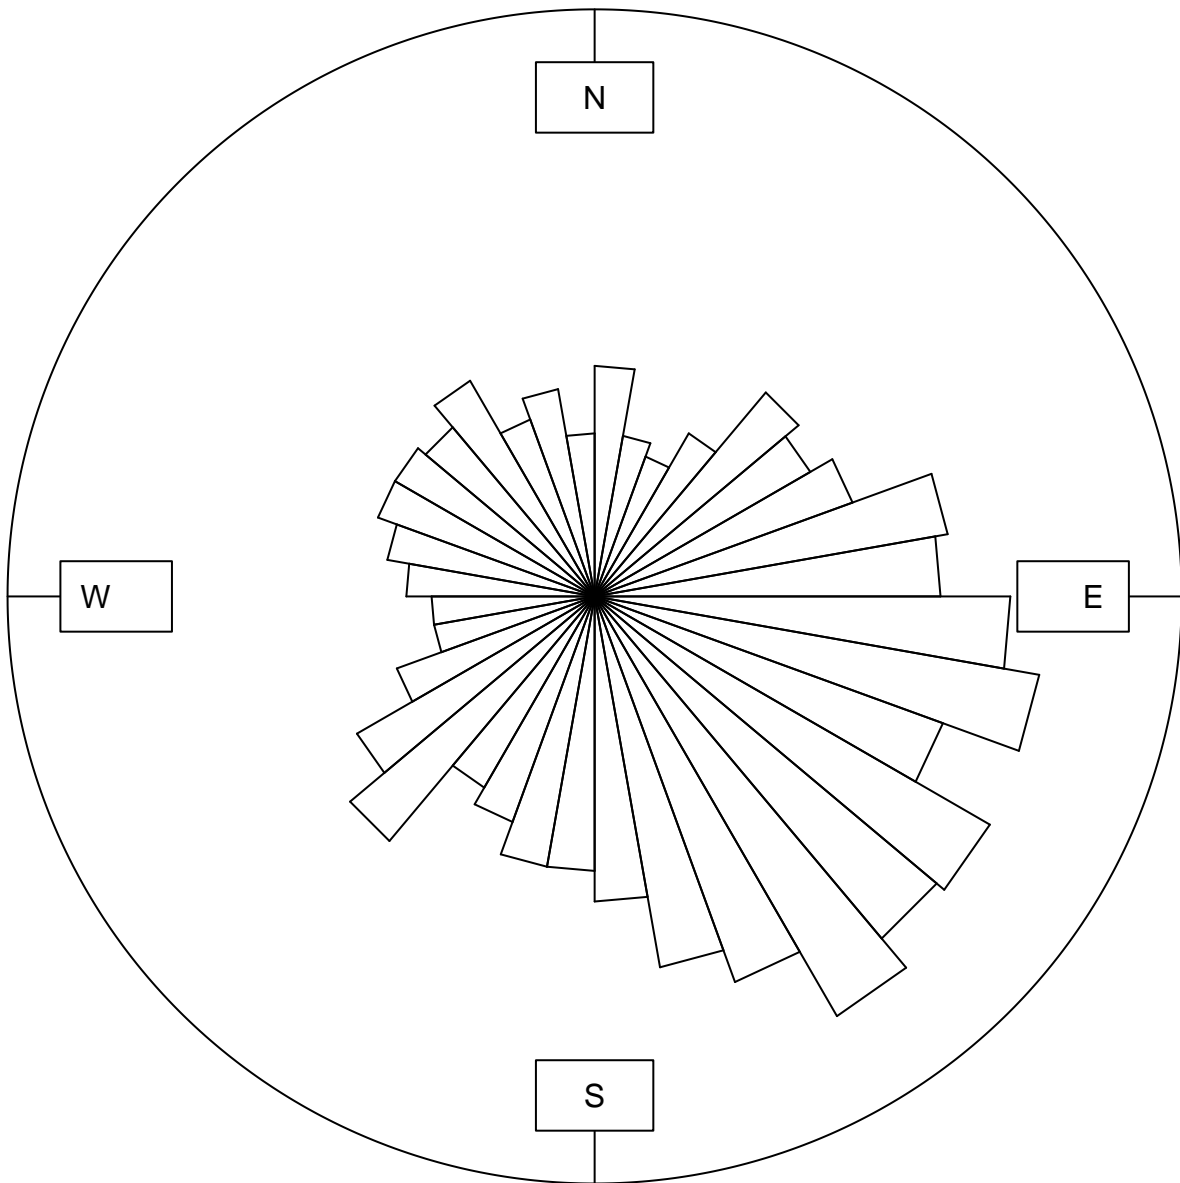

# bootstrap 67

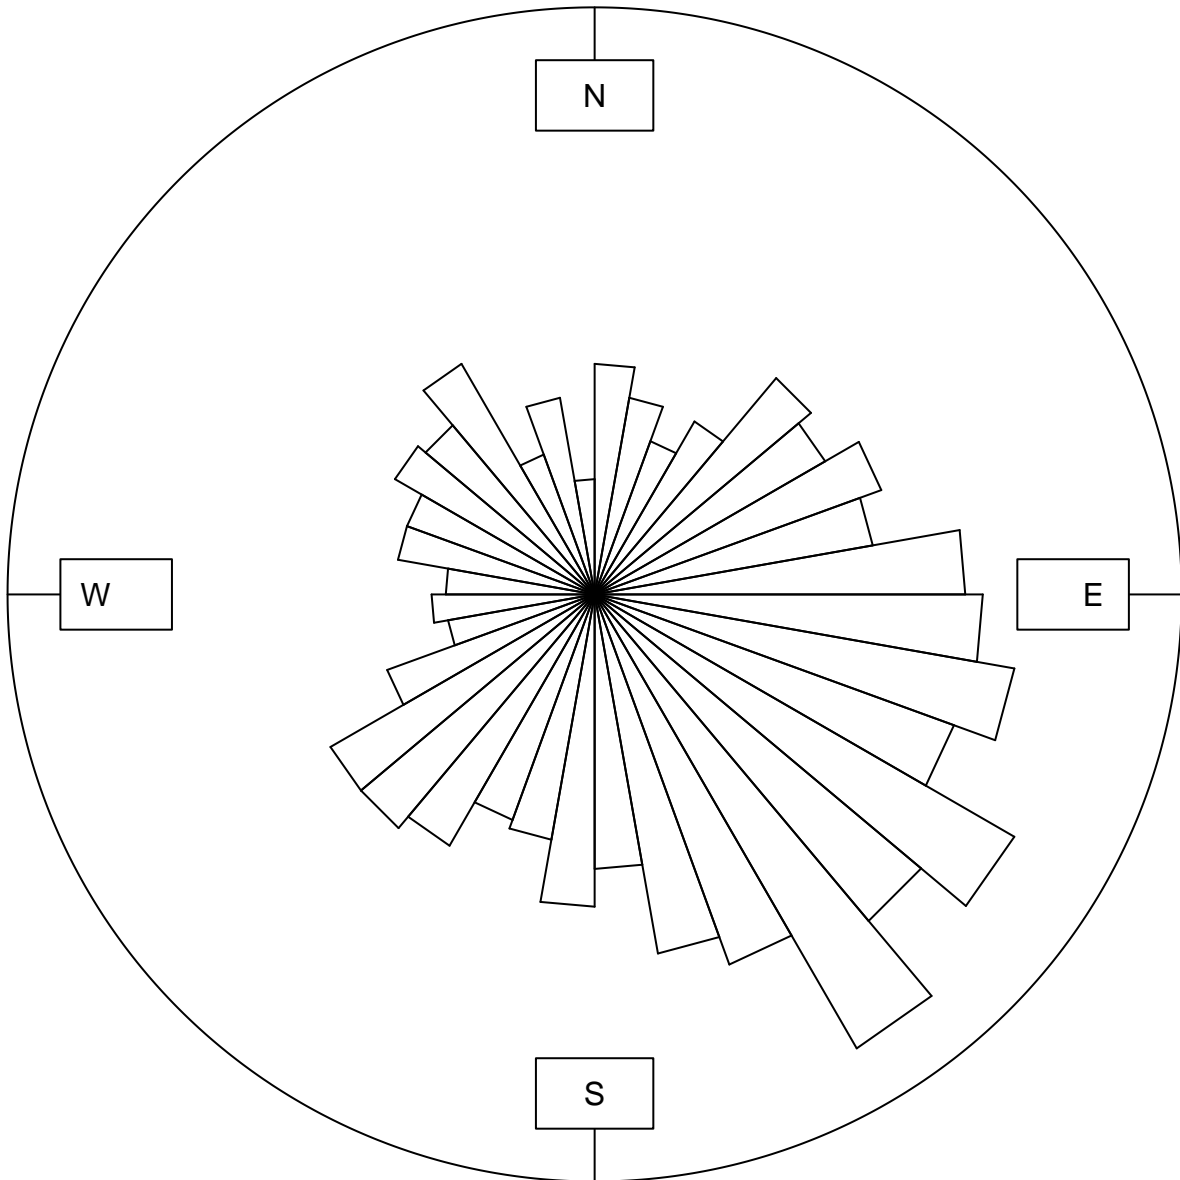

# bootstrap 68

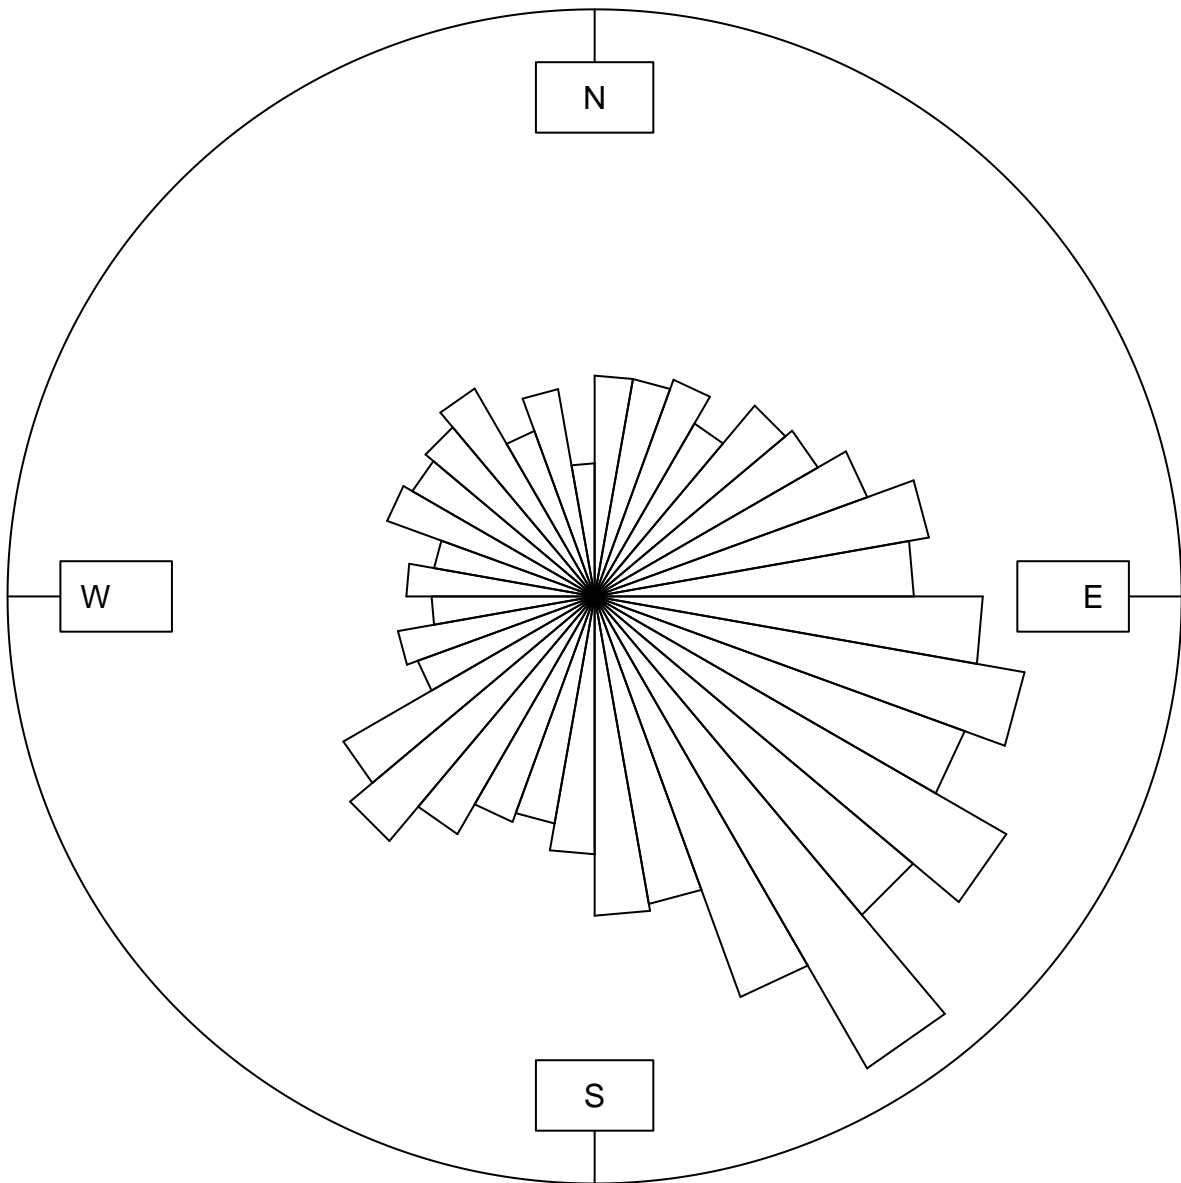

**bootstrap 69**

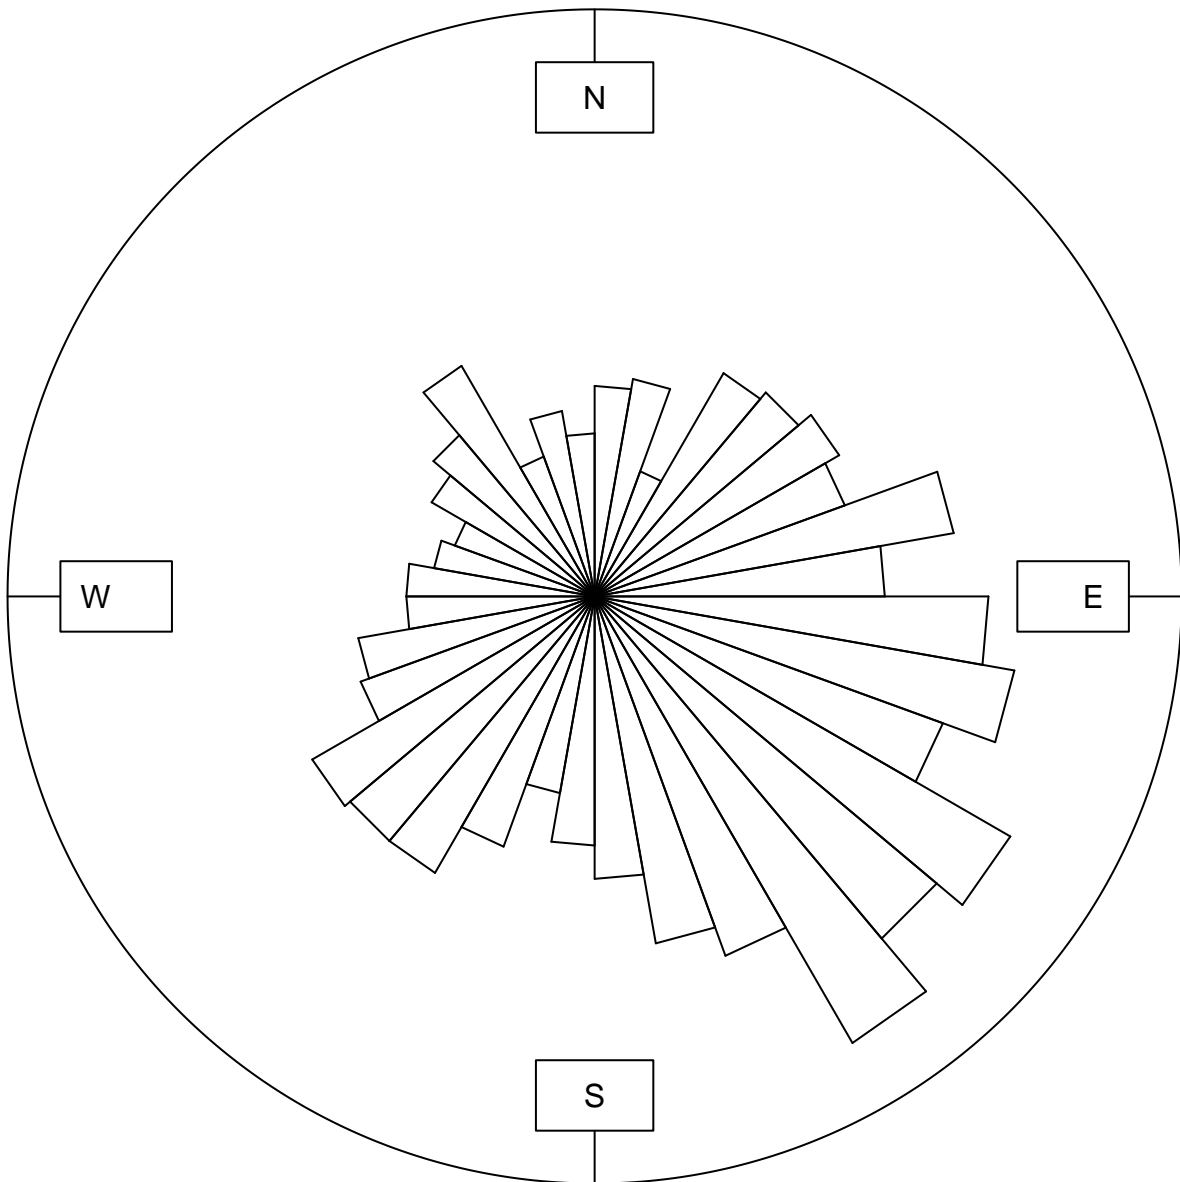

# bootstrap 70

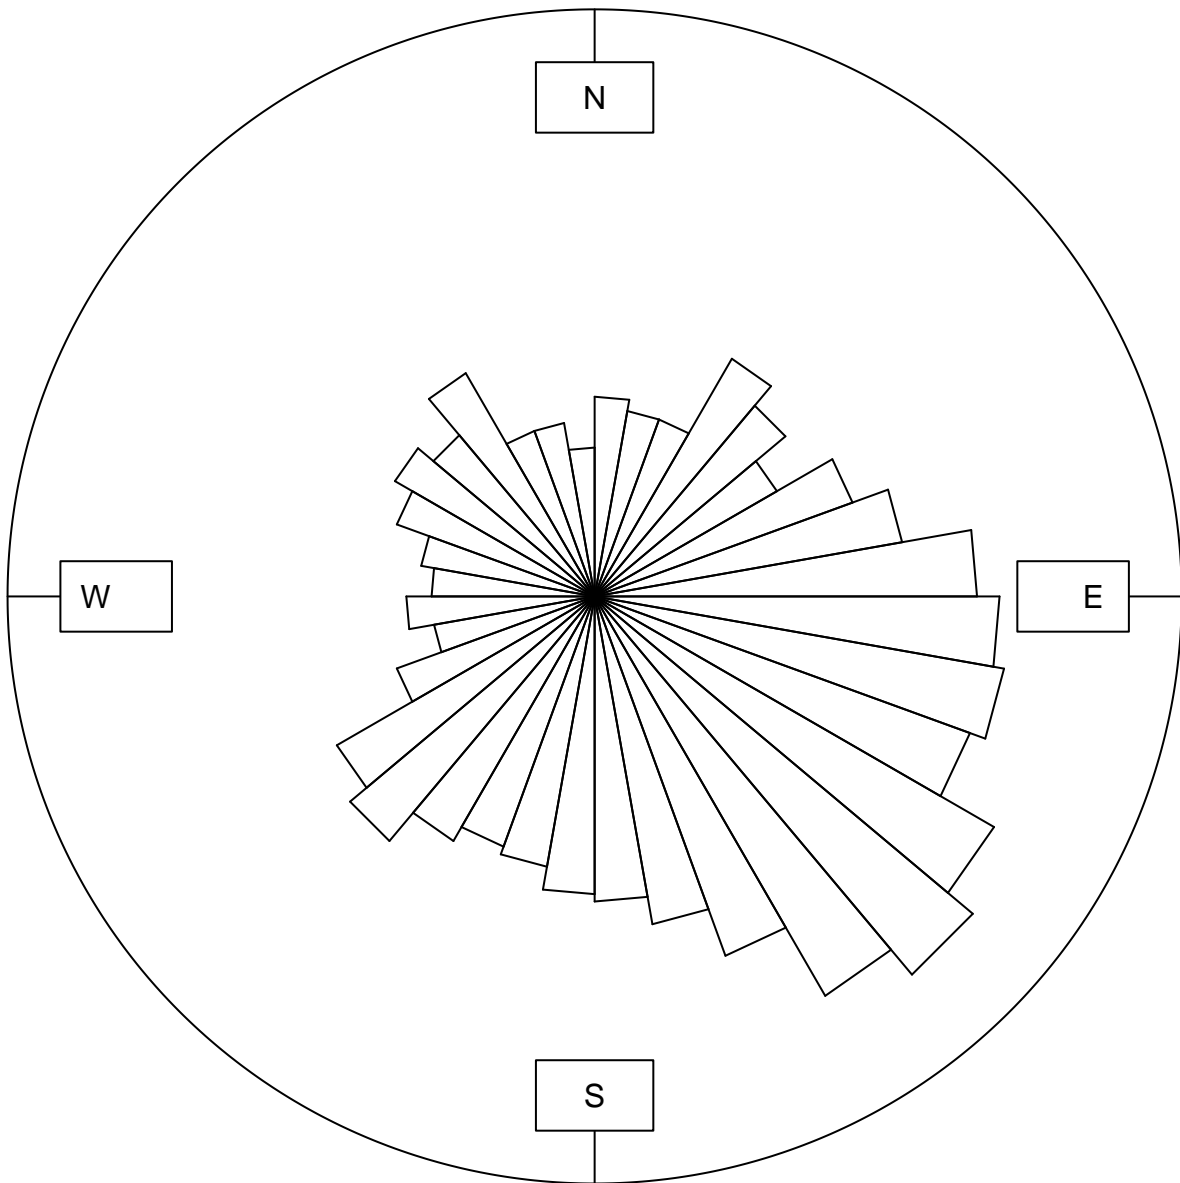

# bootstrap 71

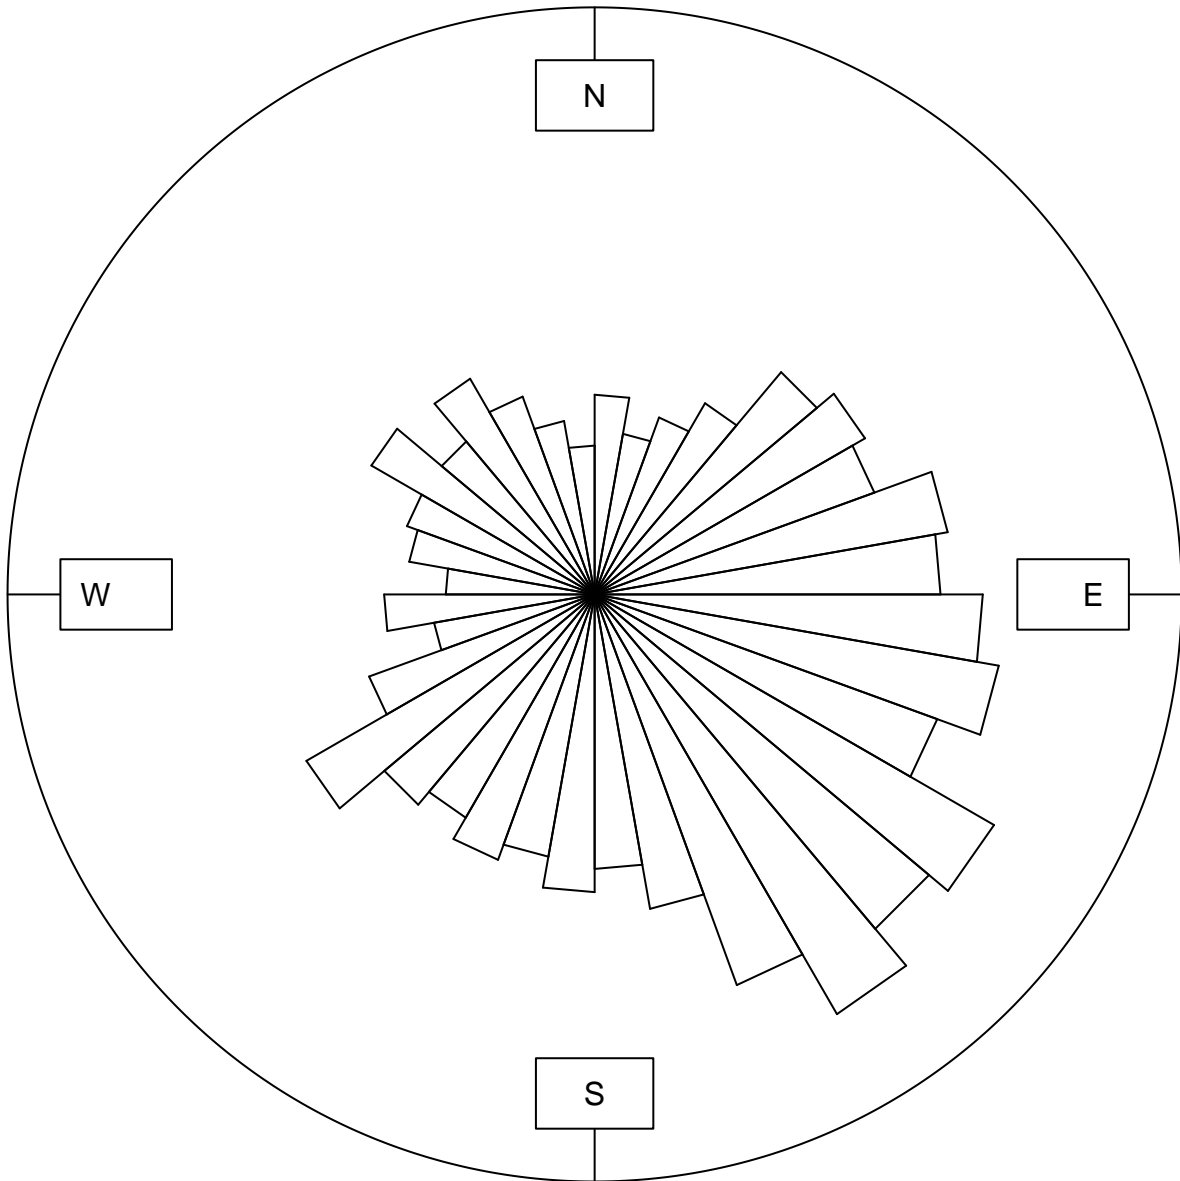

# bootstrap 72

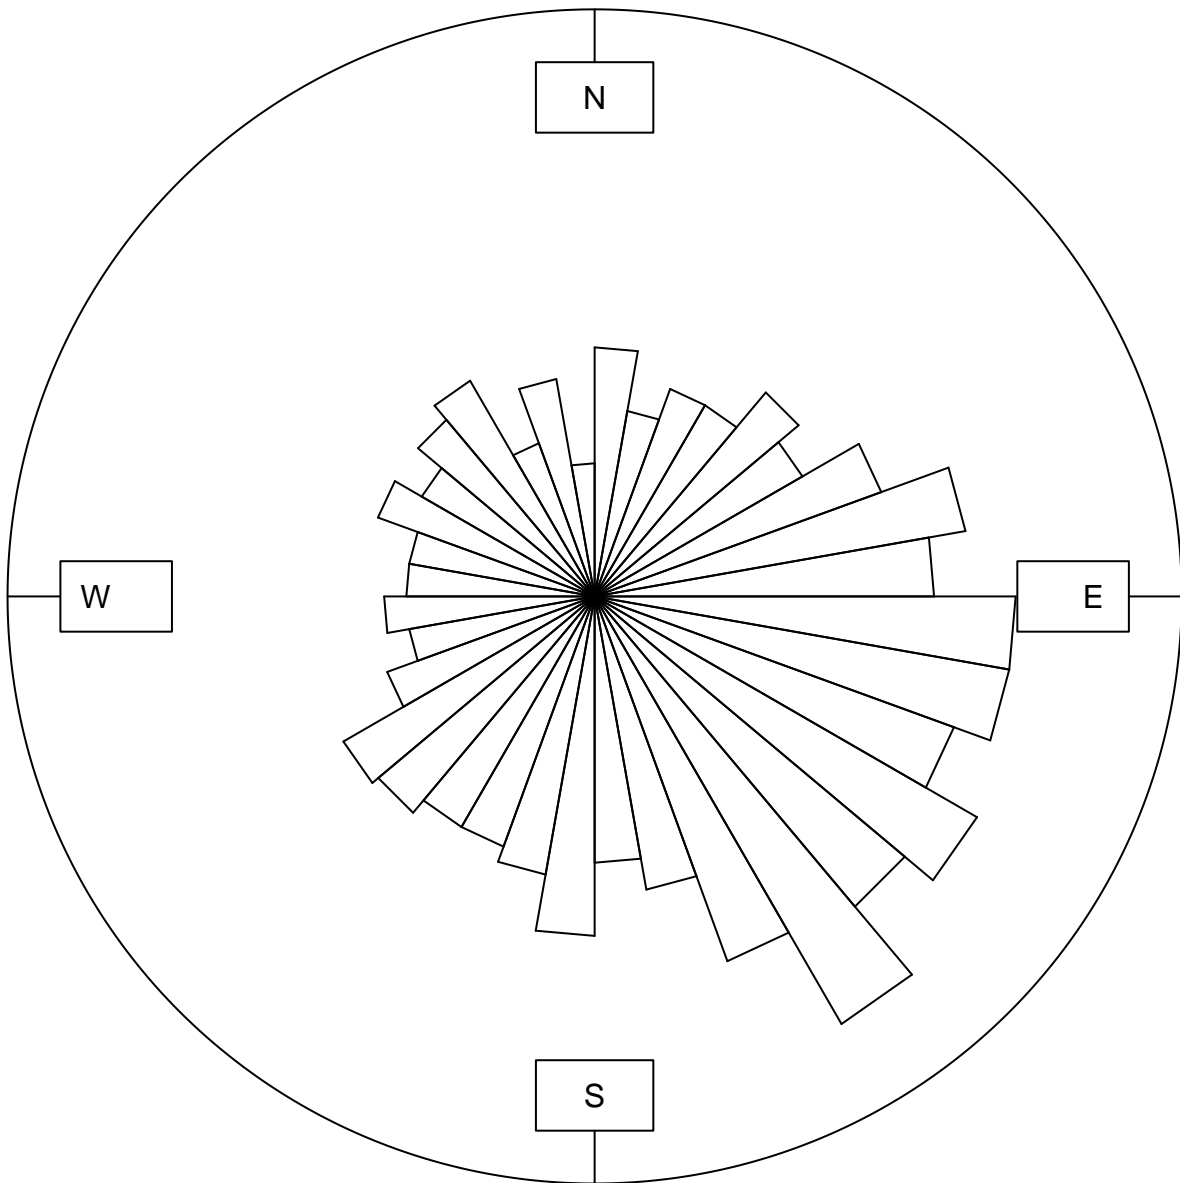



# bootstrap 73

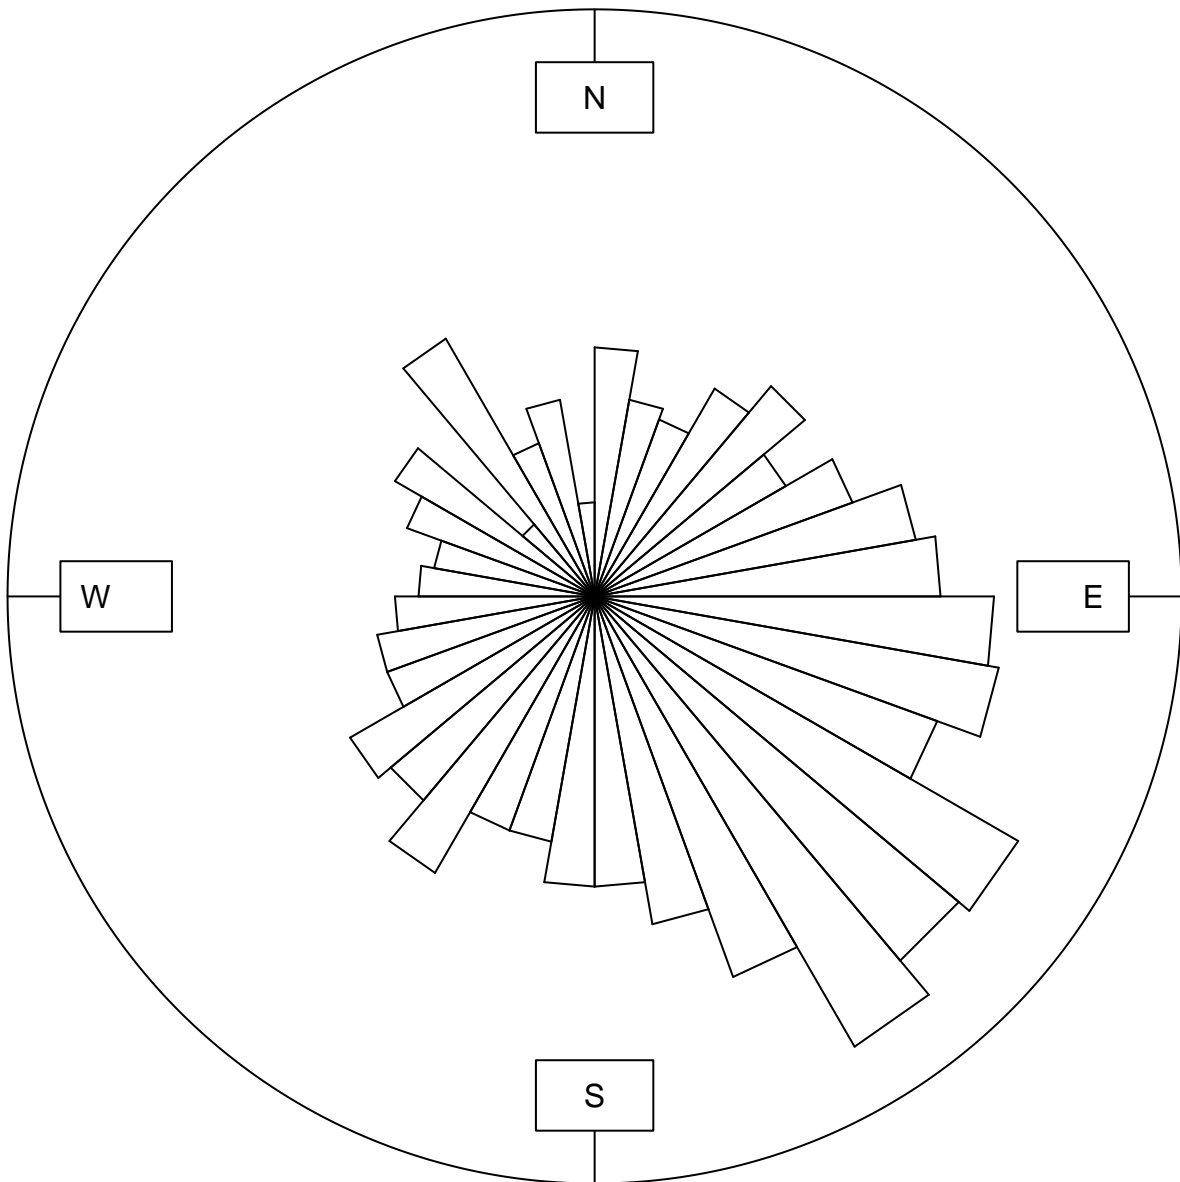

# bootstrap 74

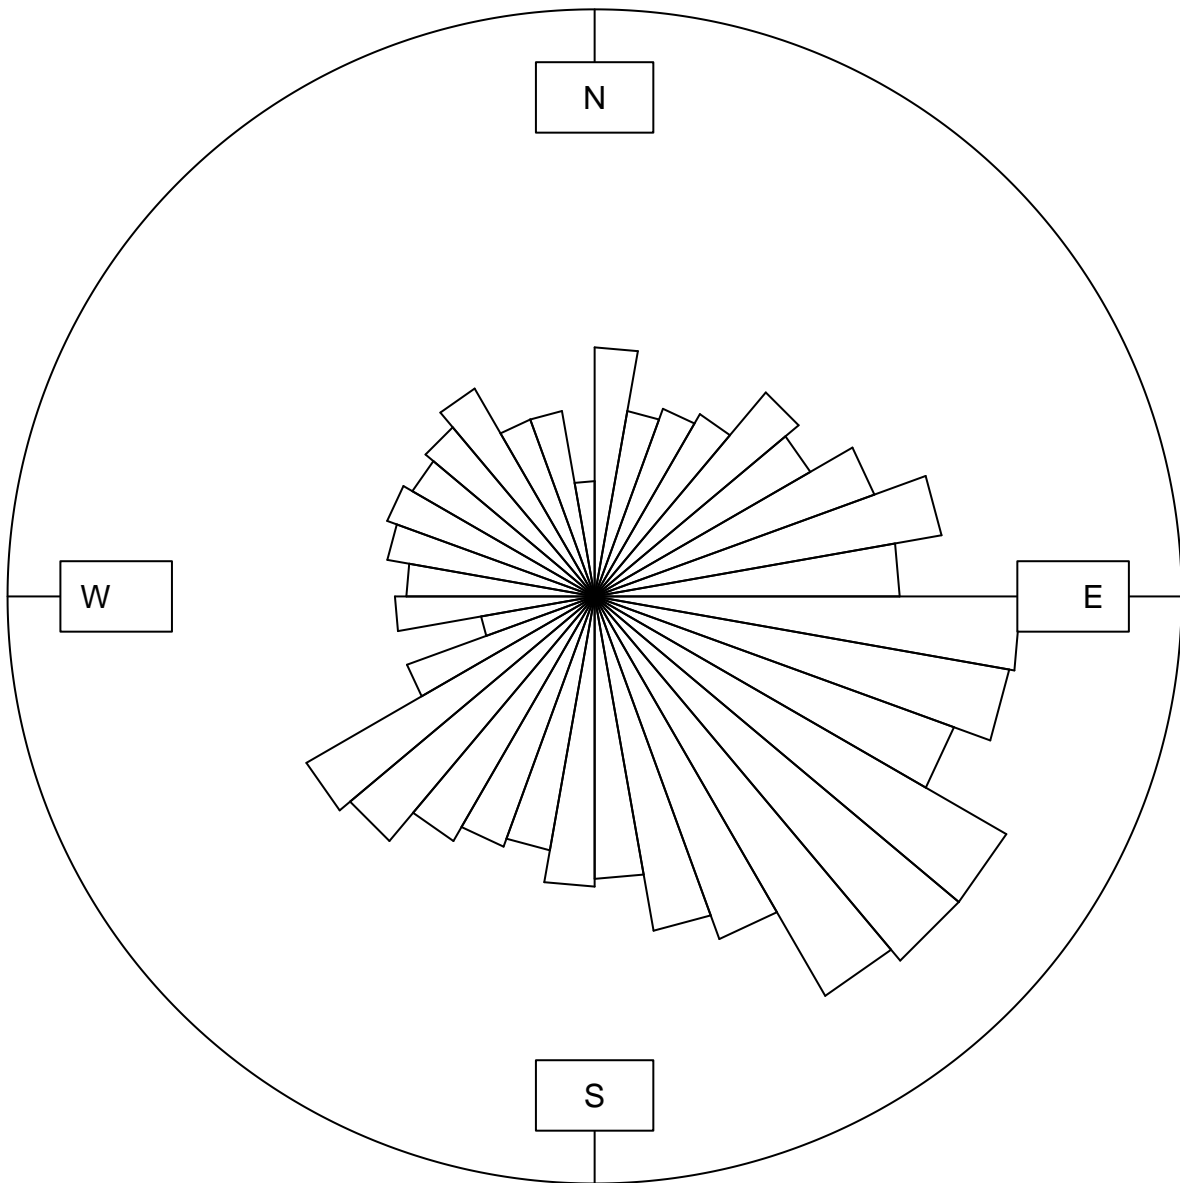

# bootstrap 75

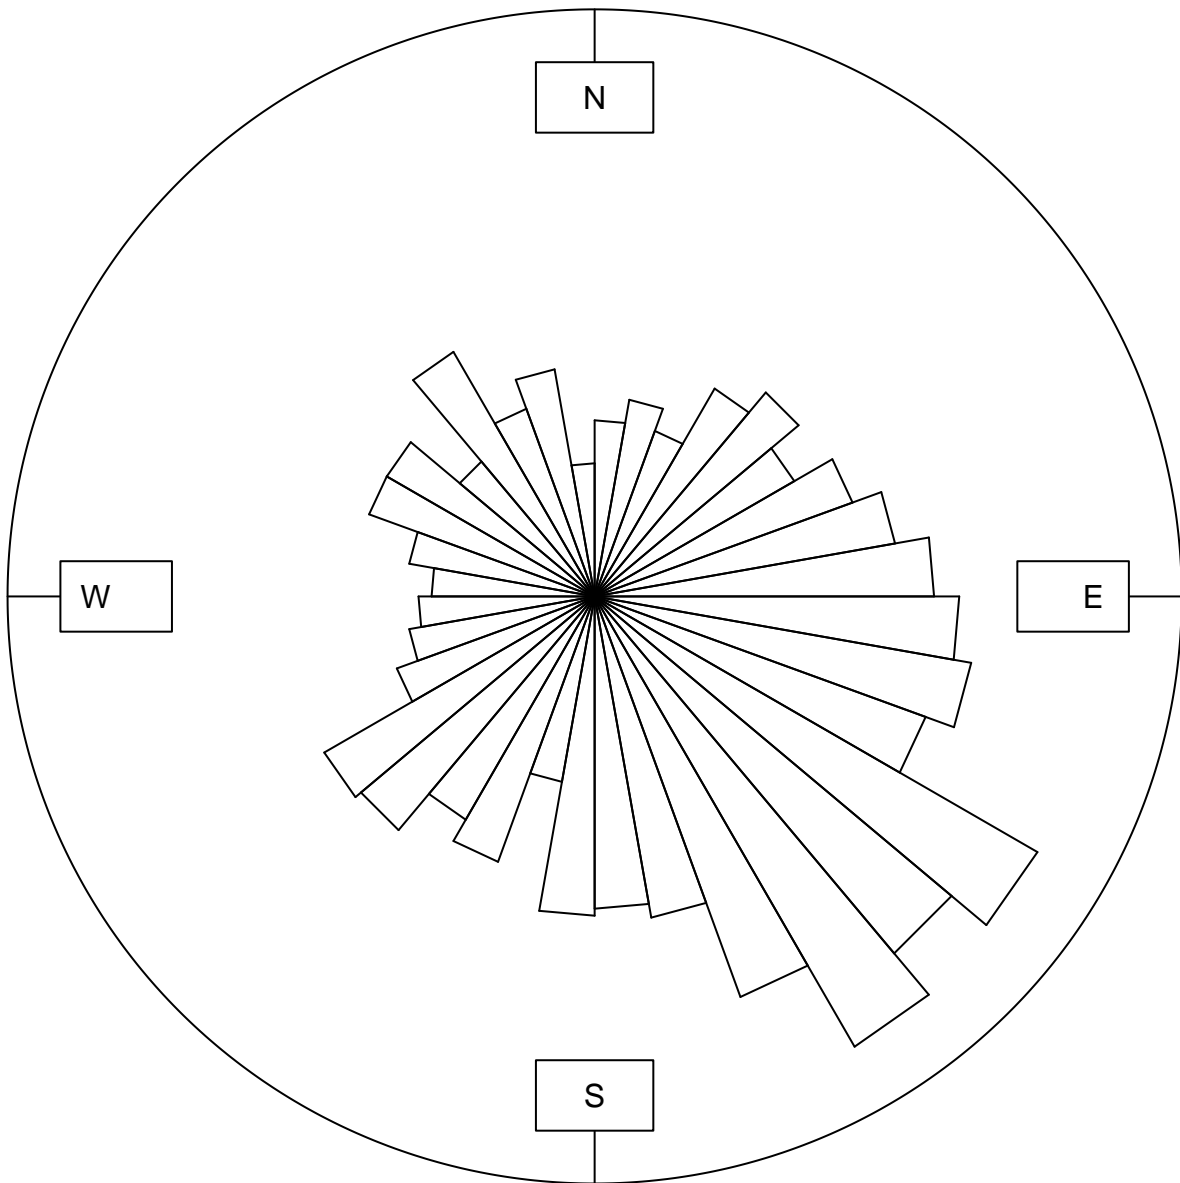

# bootstrap 76

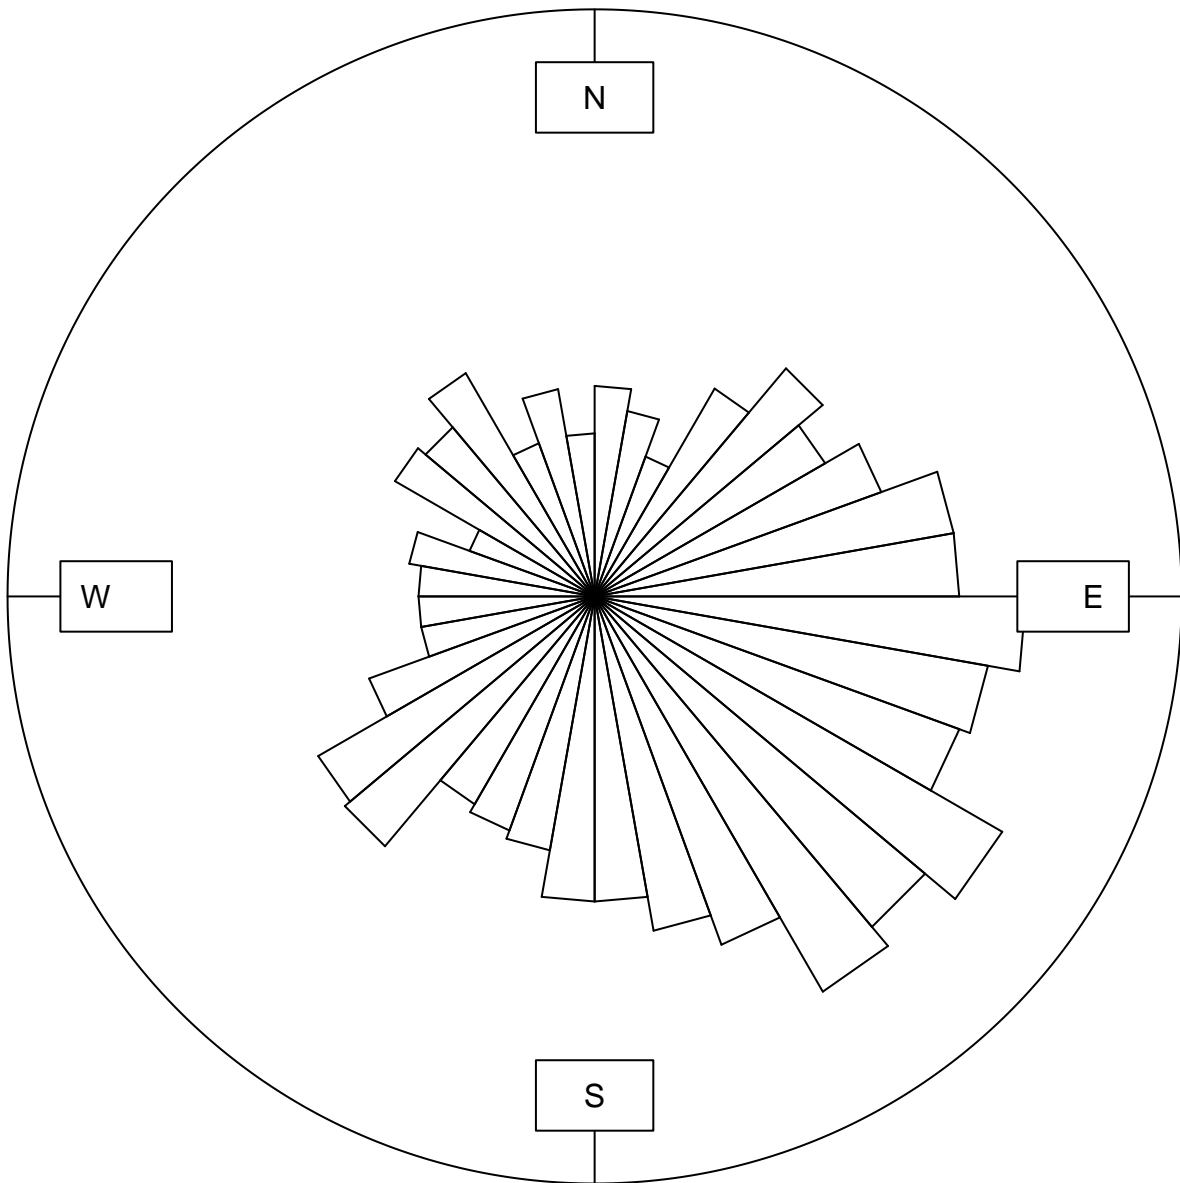

# bootstrap 77

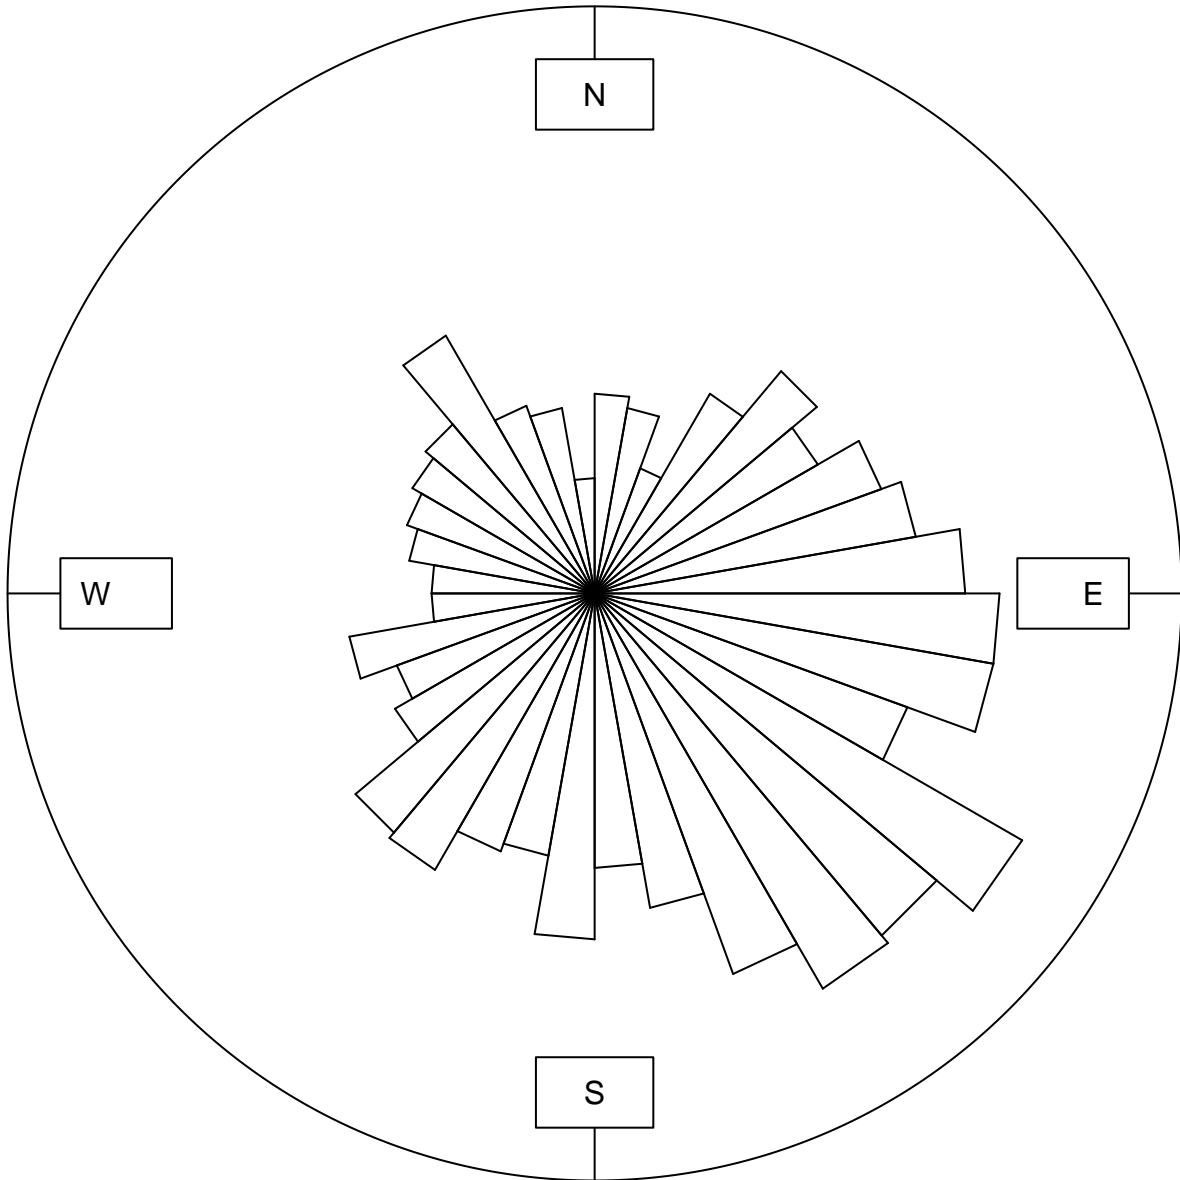

# bootstrap 78

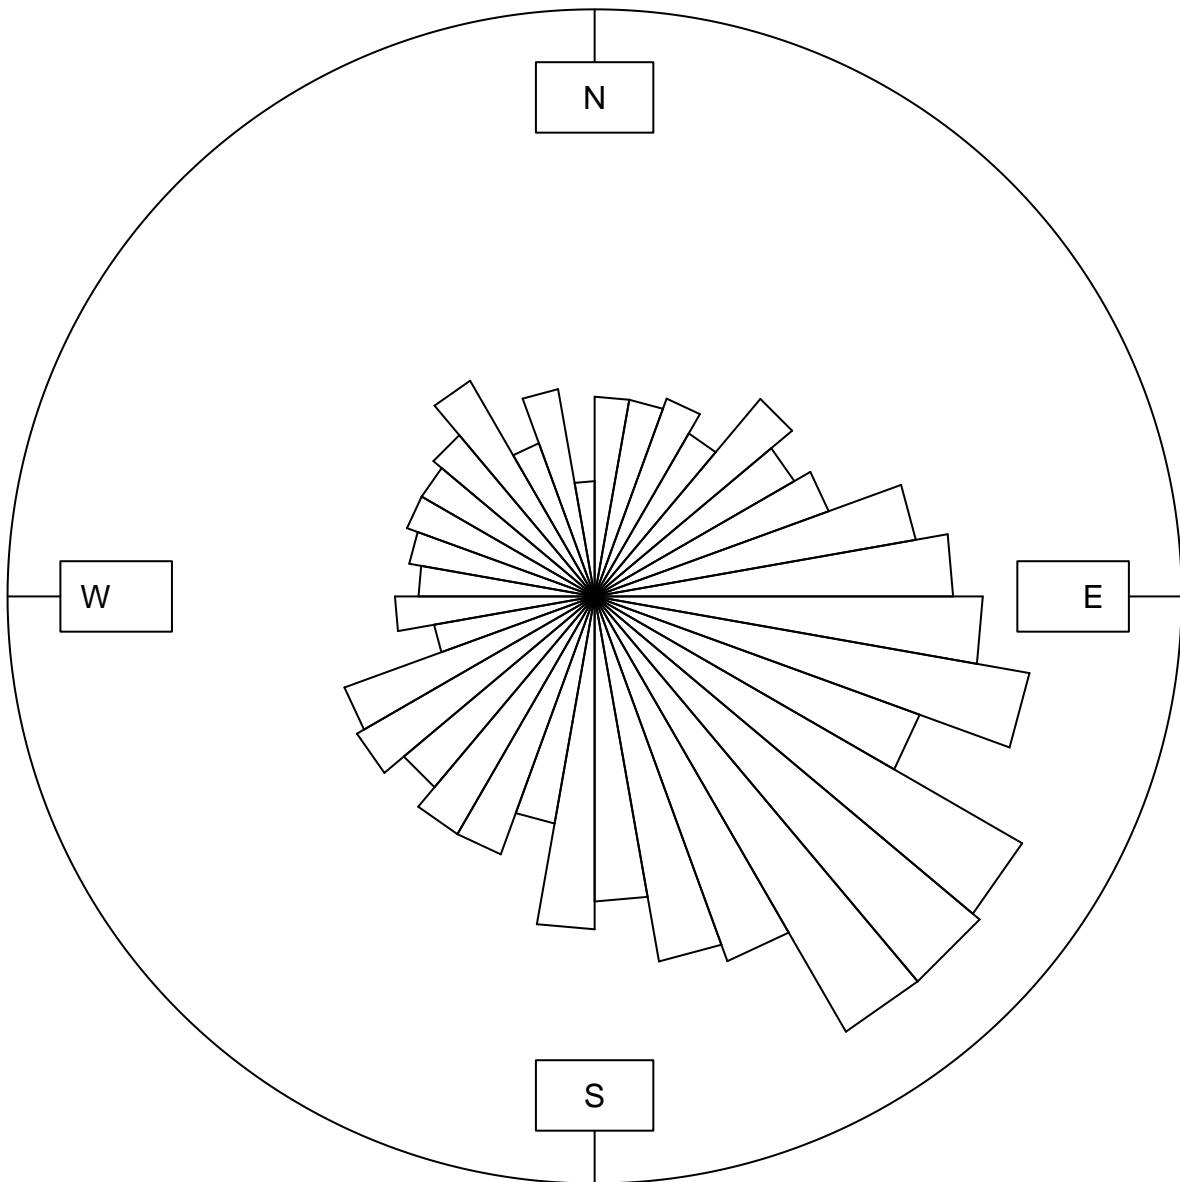

# bootstrap 79

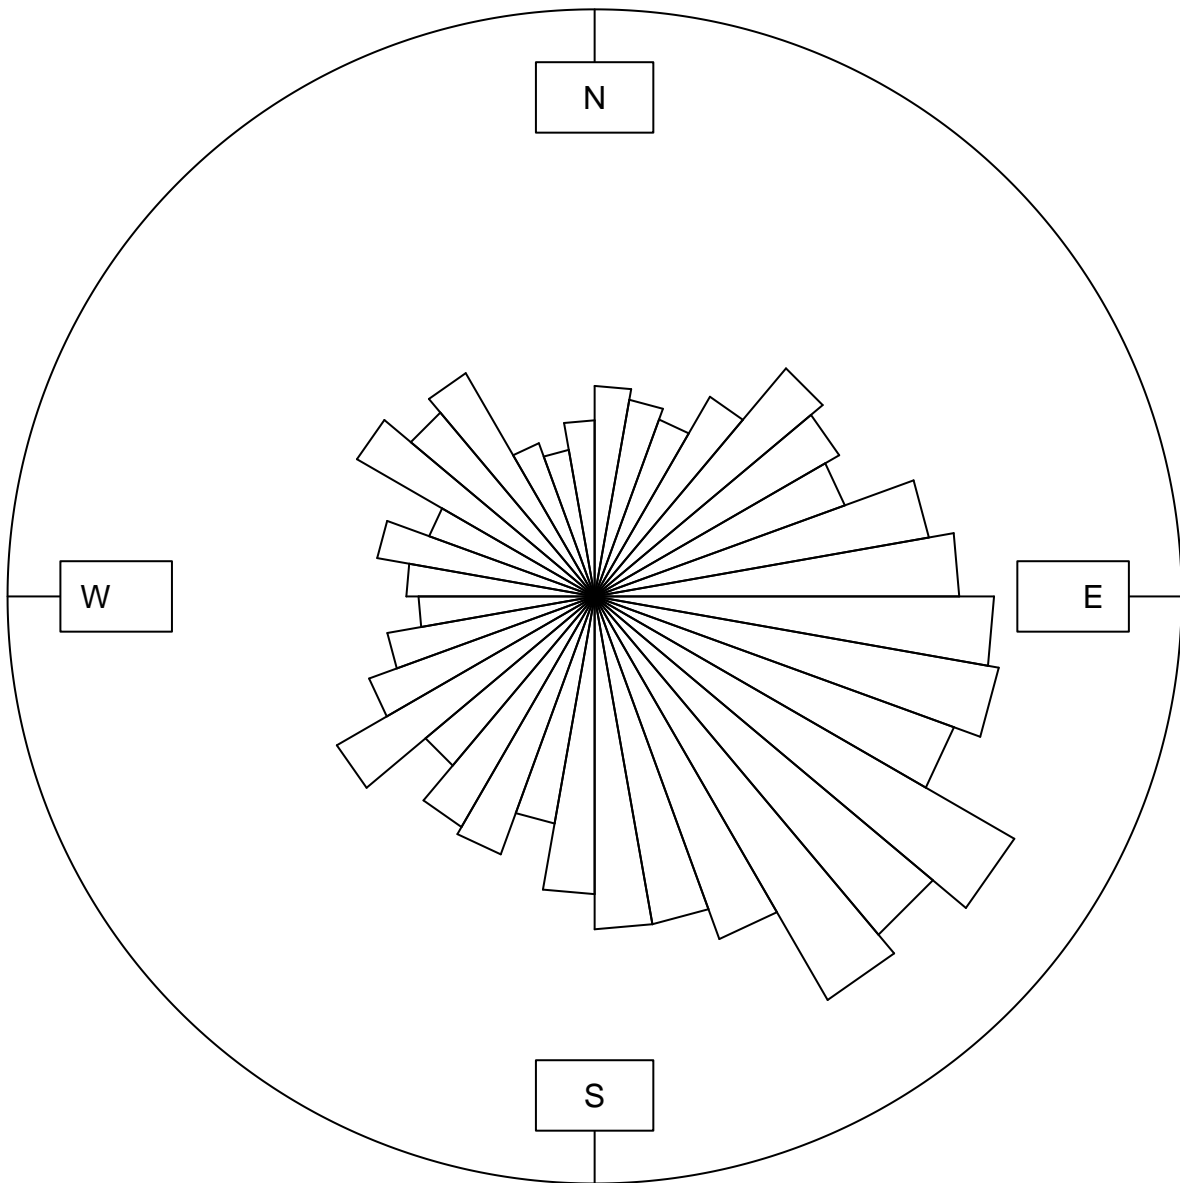

# bootstrap 80

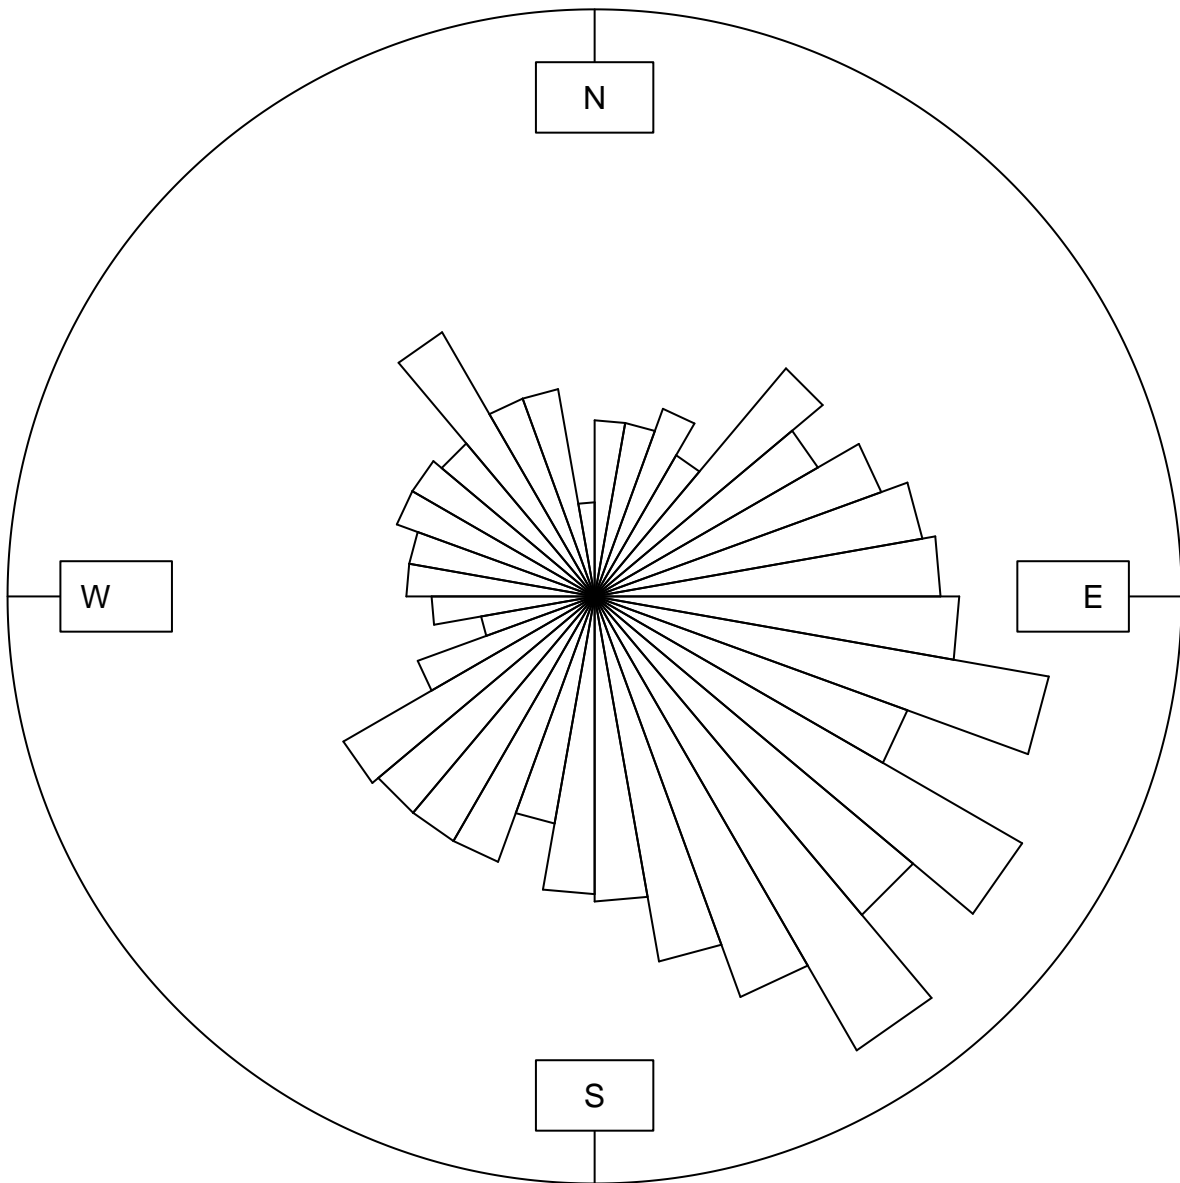



# bootstrap 81

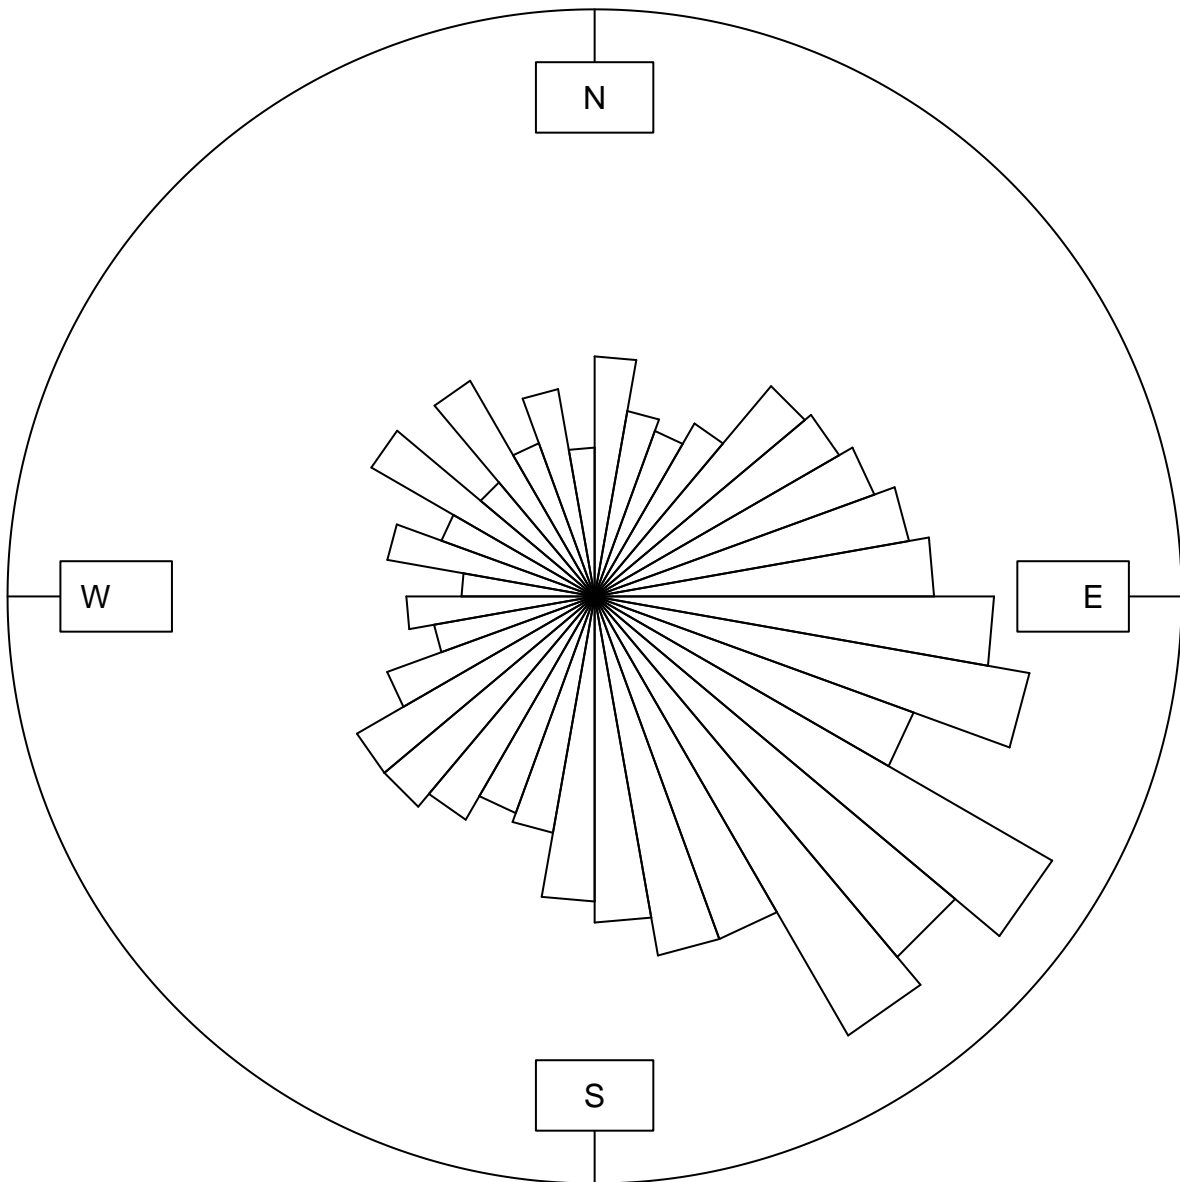

# bootstrap 82

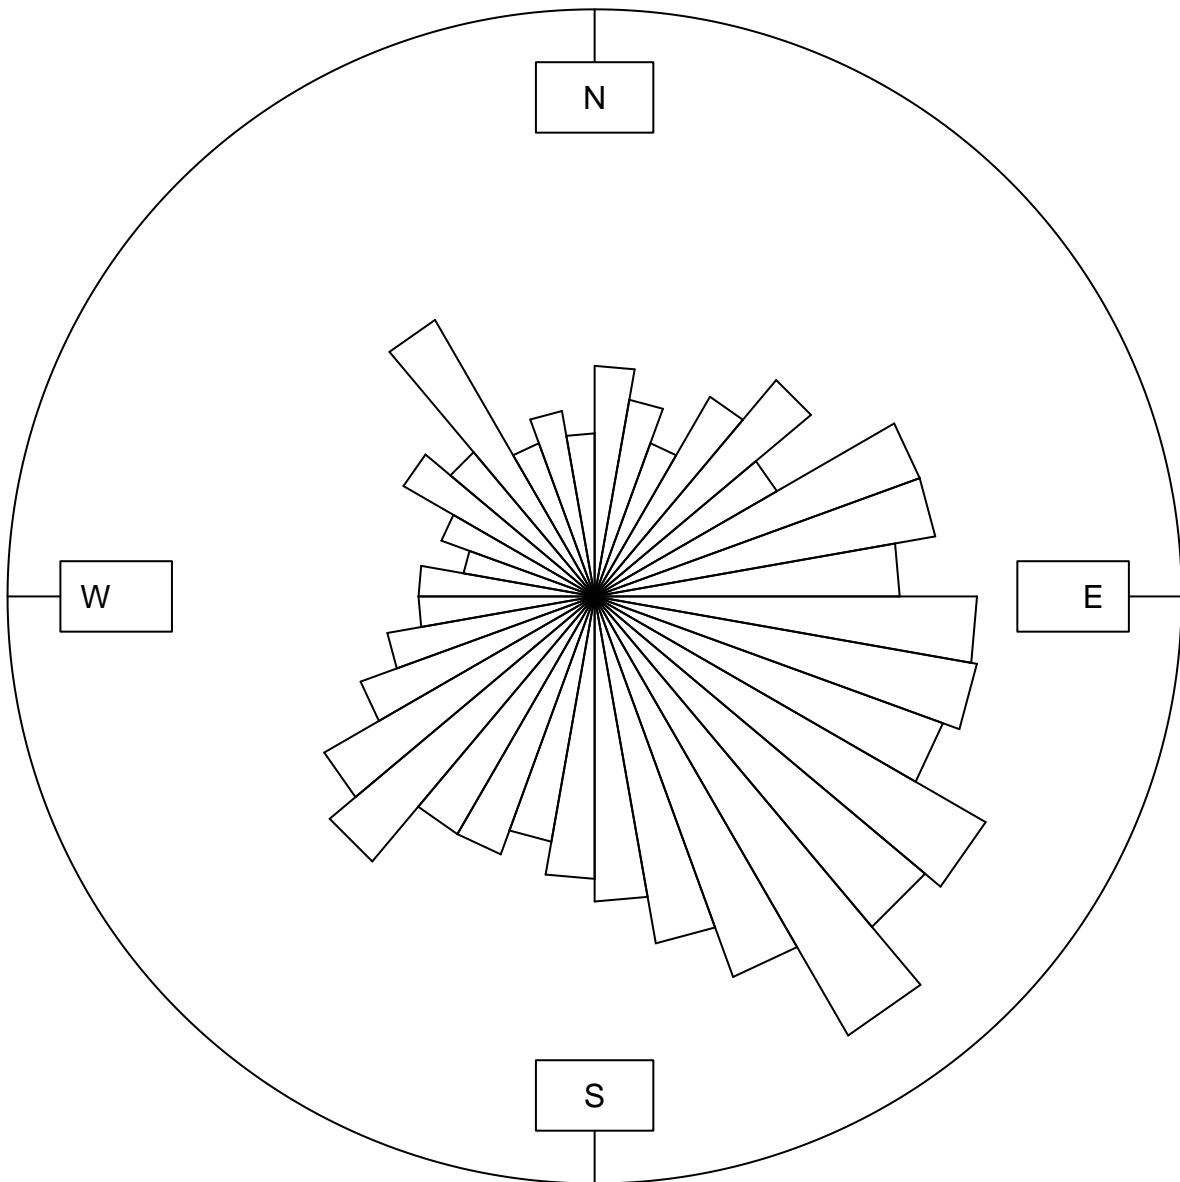

# bootstrap 83

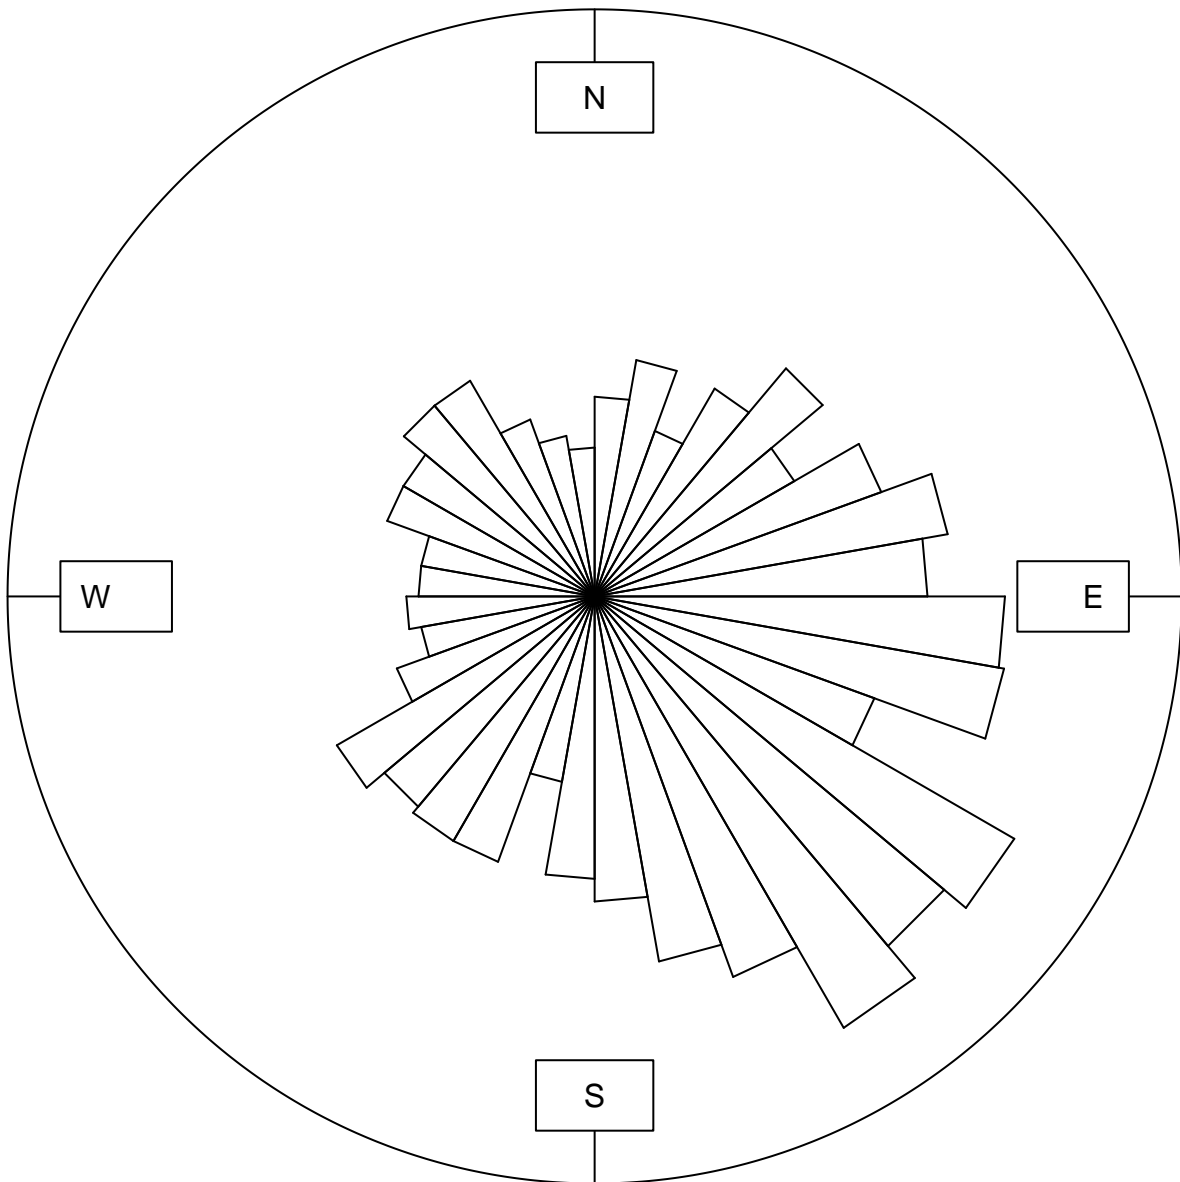

# bootstrap 84

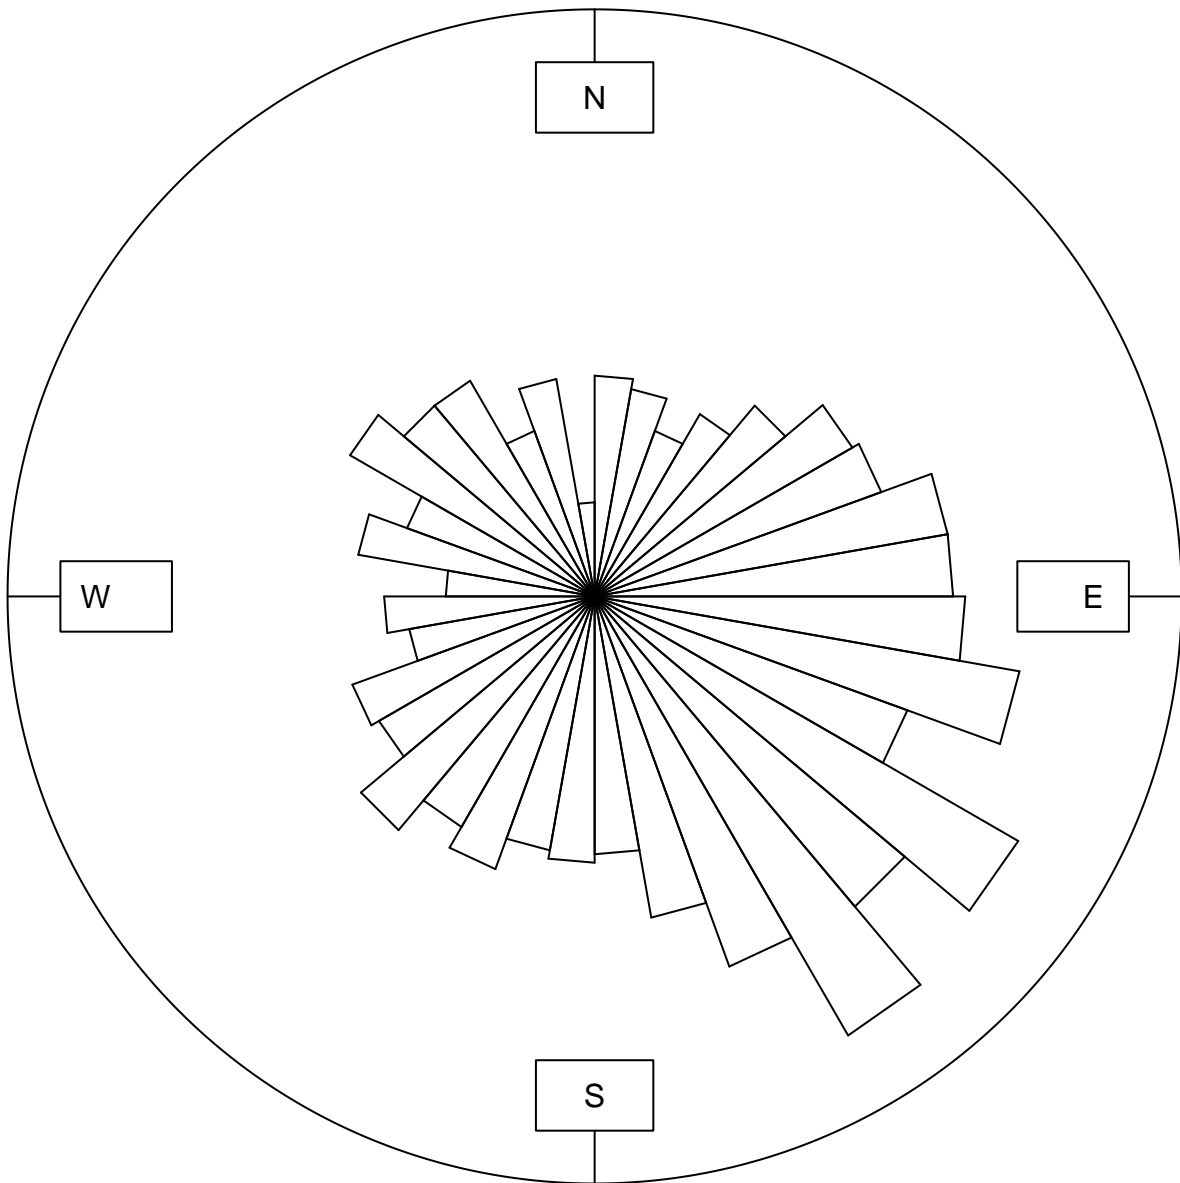

# bootstrap 85

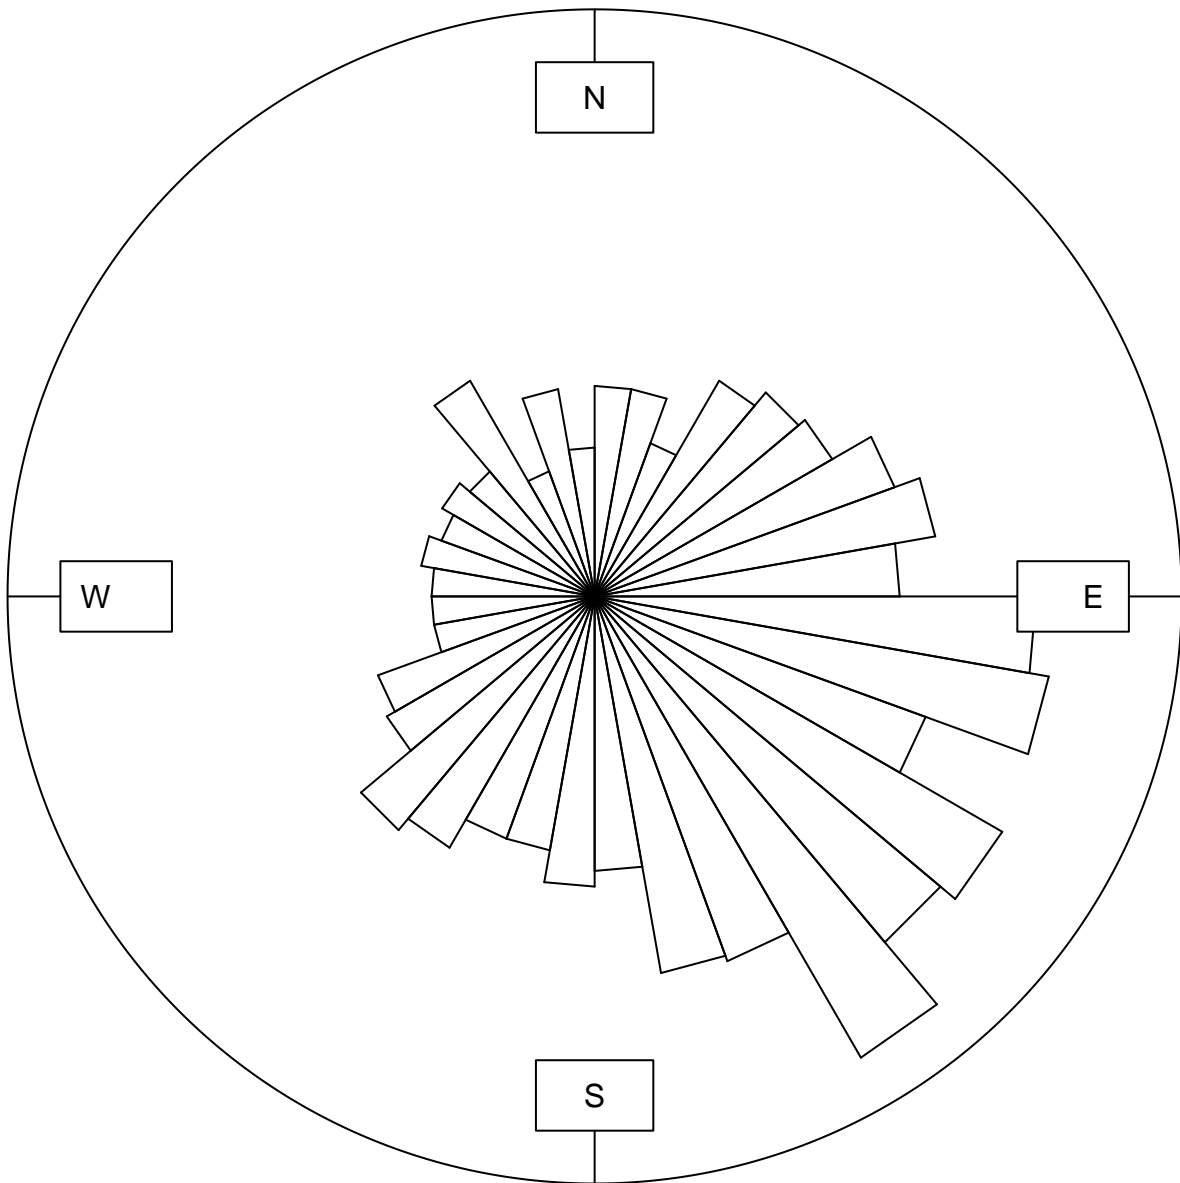

# bootstrap 86

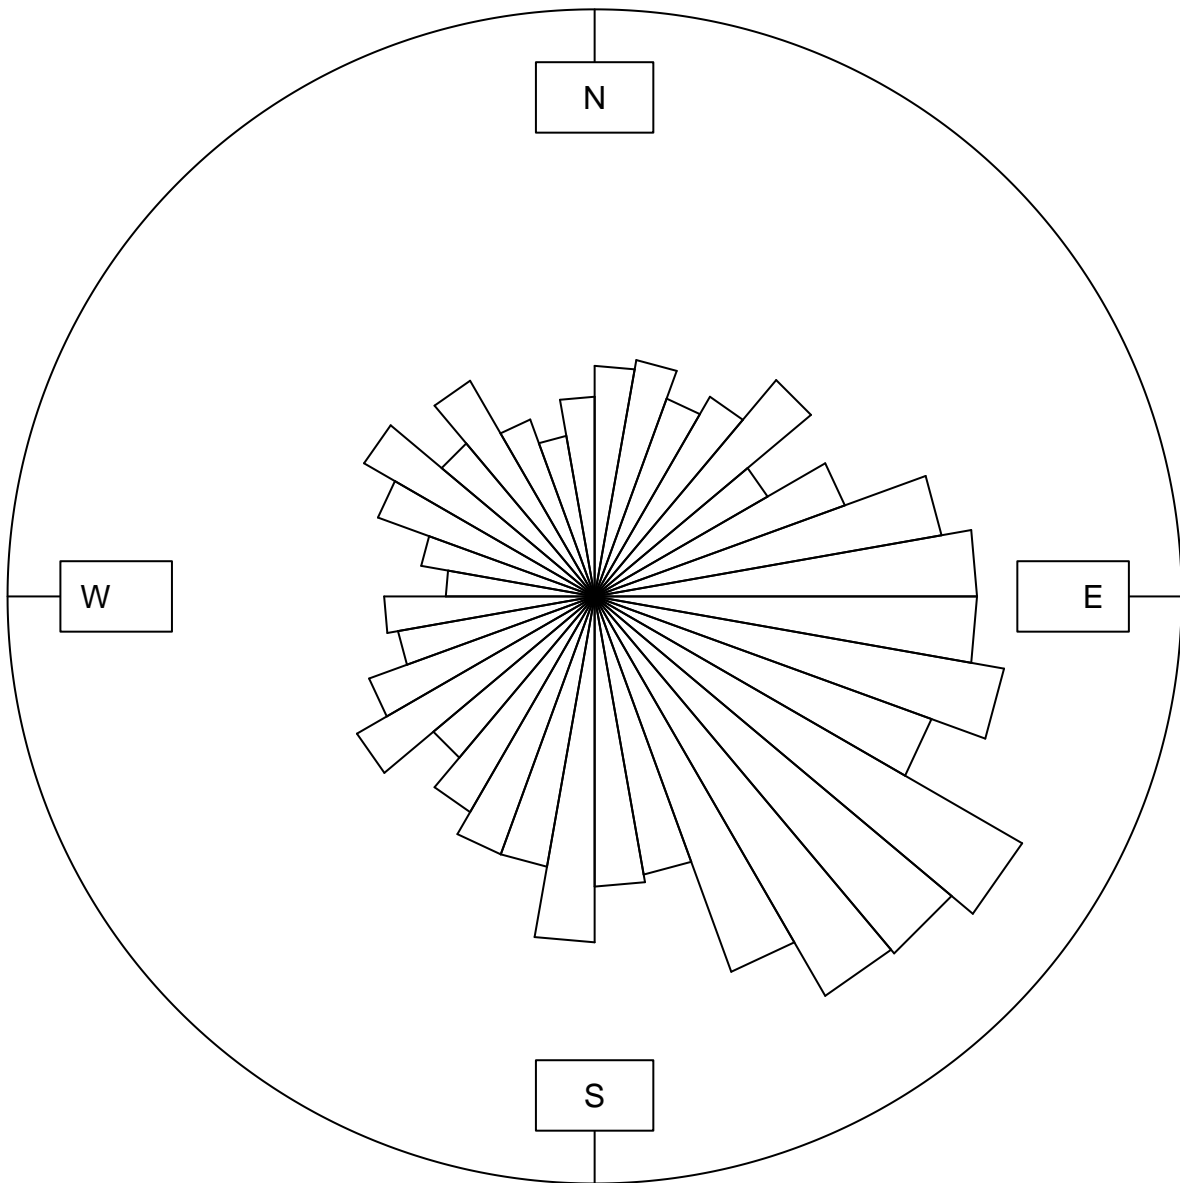

# bootstrap 87

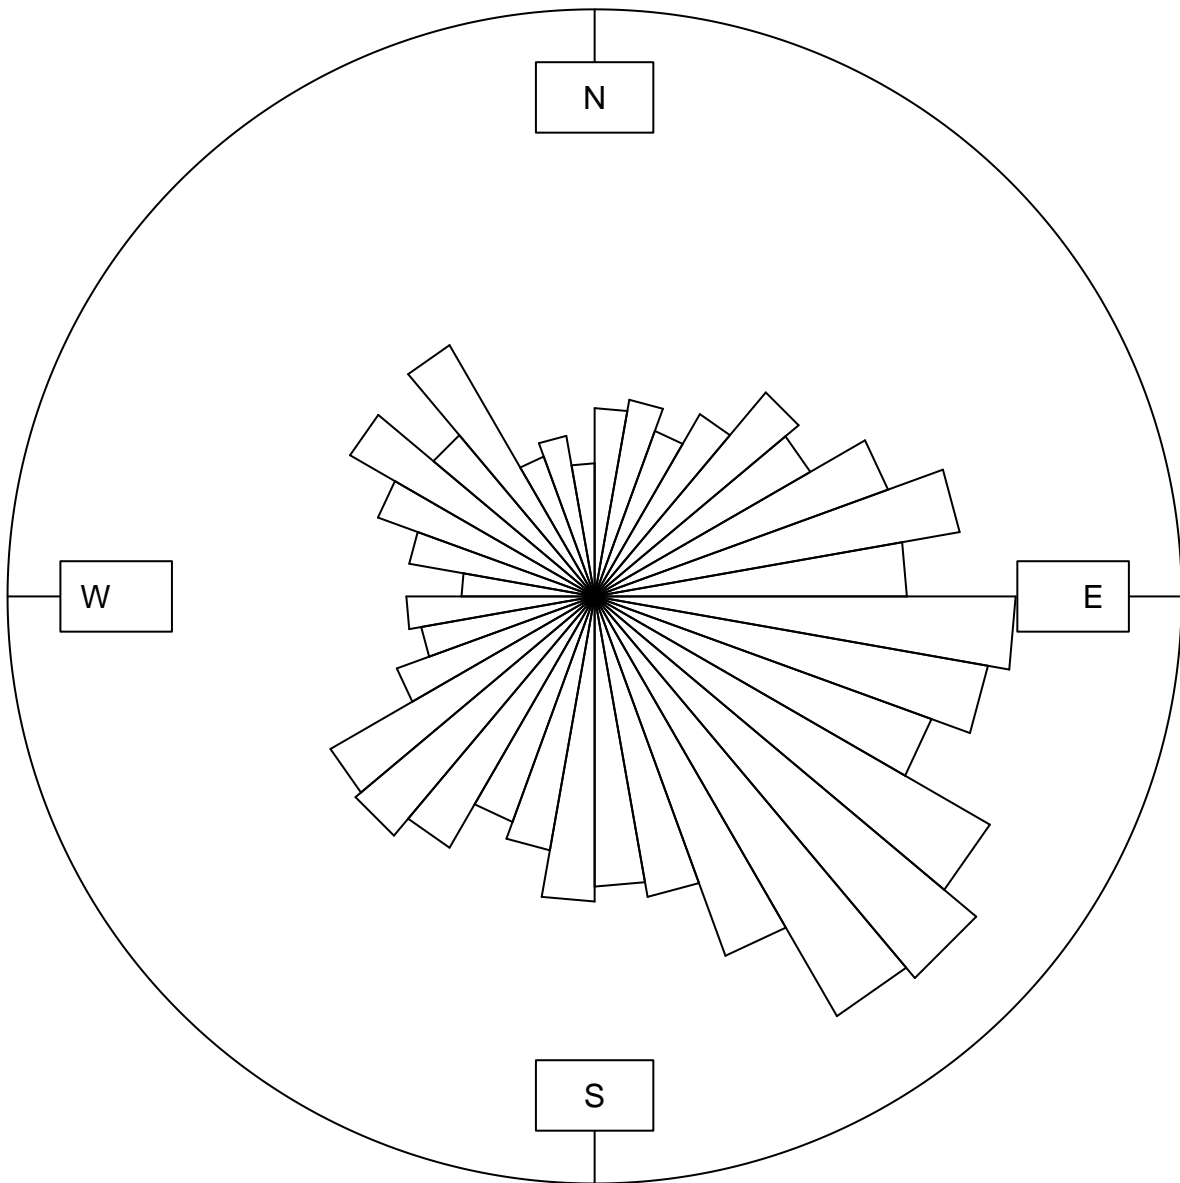

# bootstrap 88

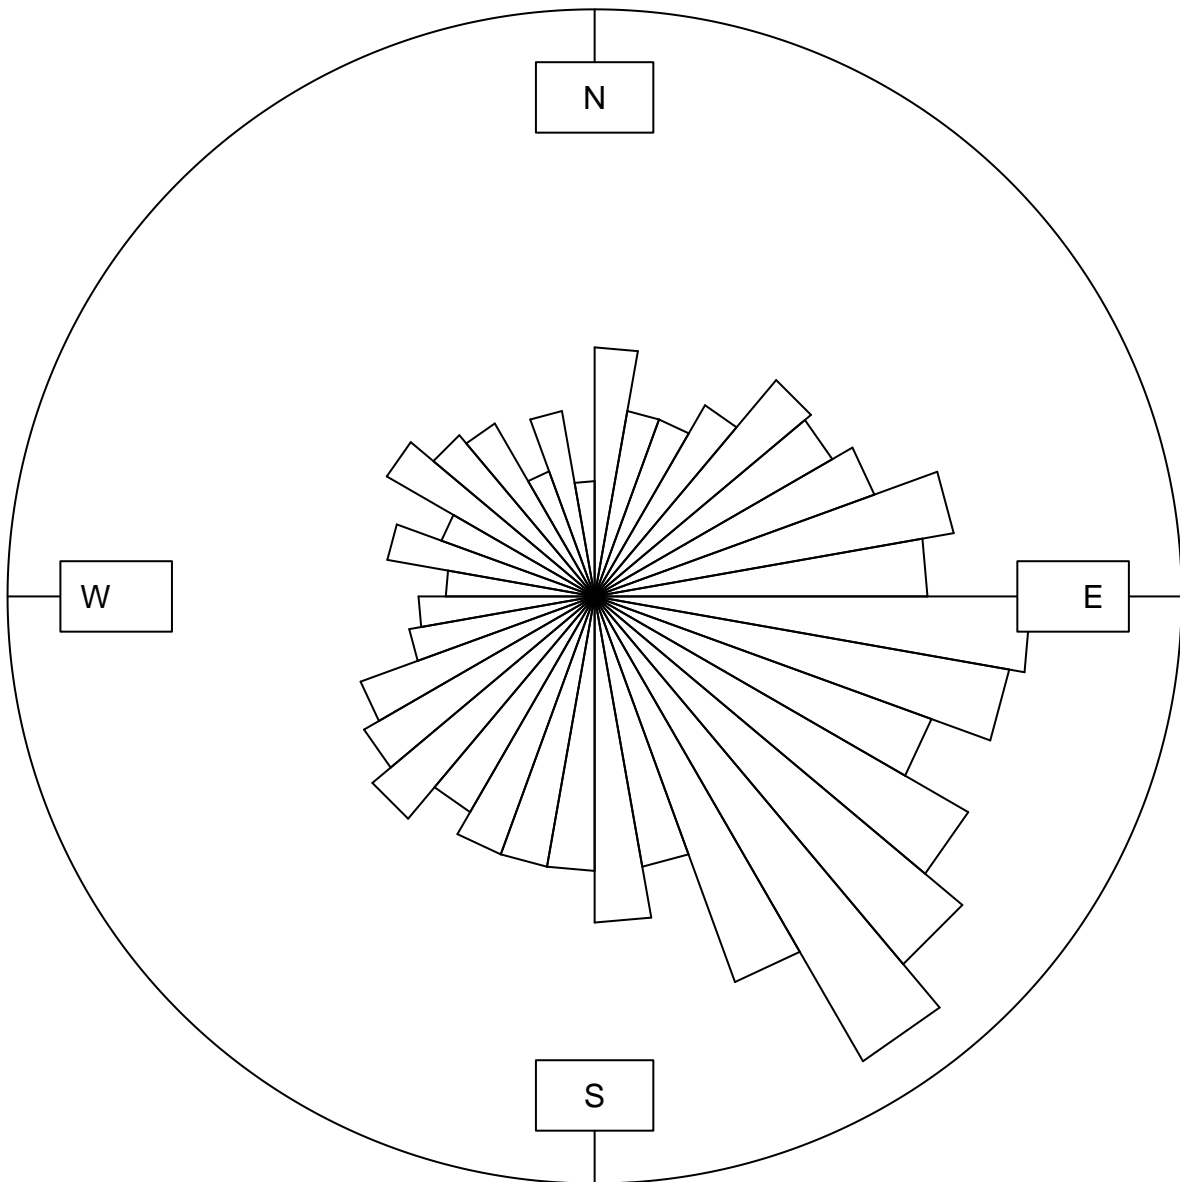



# bootstrap 89

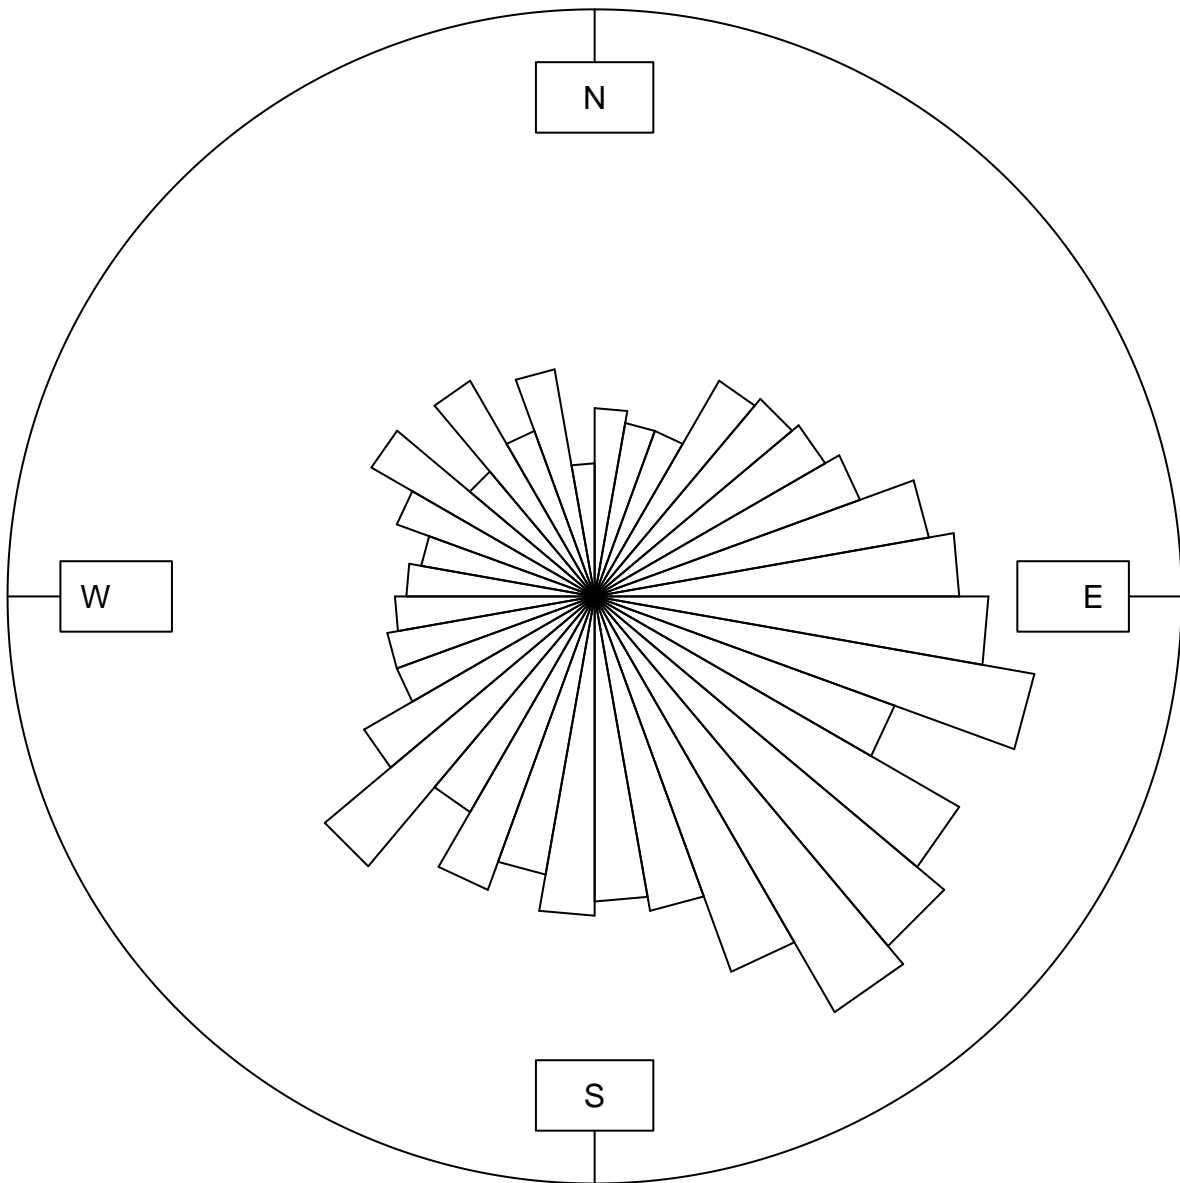

# bootstrap 90

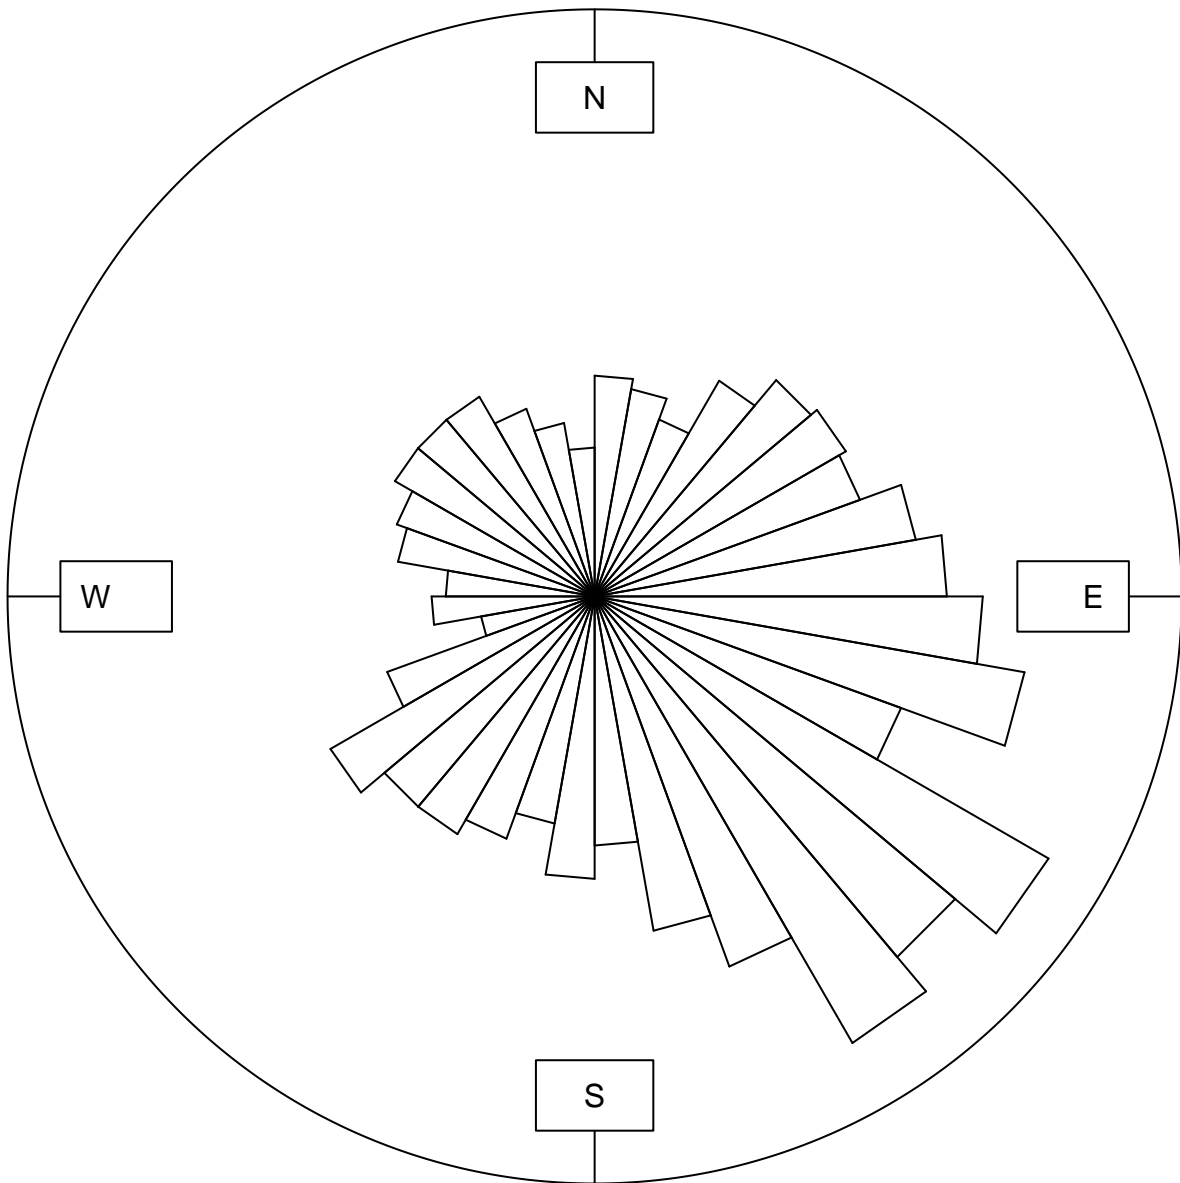

# bootstrap 91

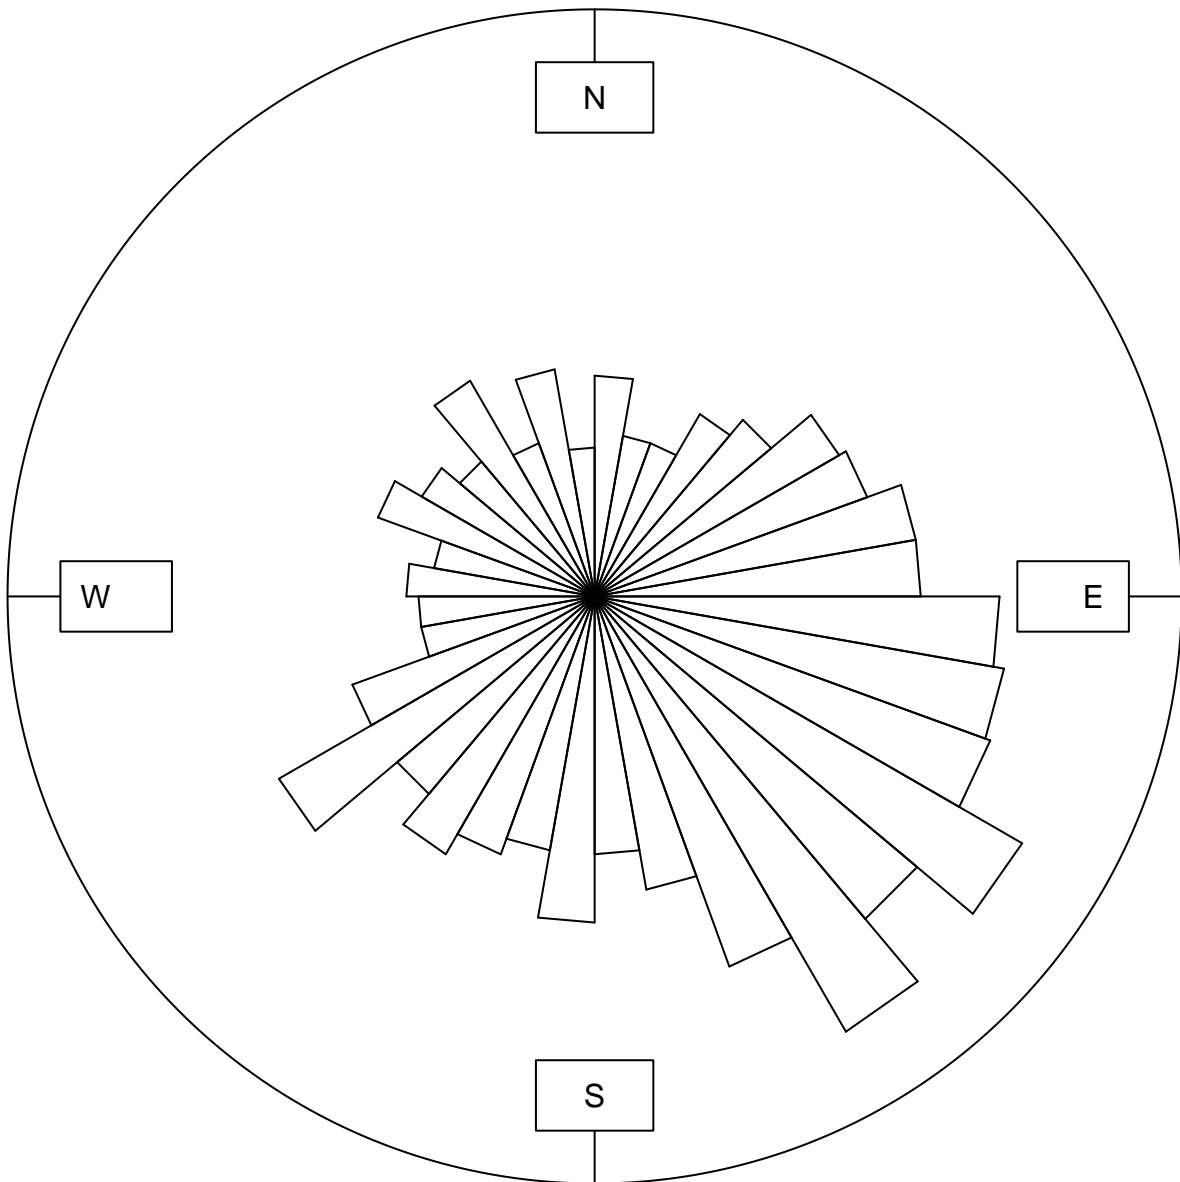

# bootstrap 92

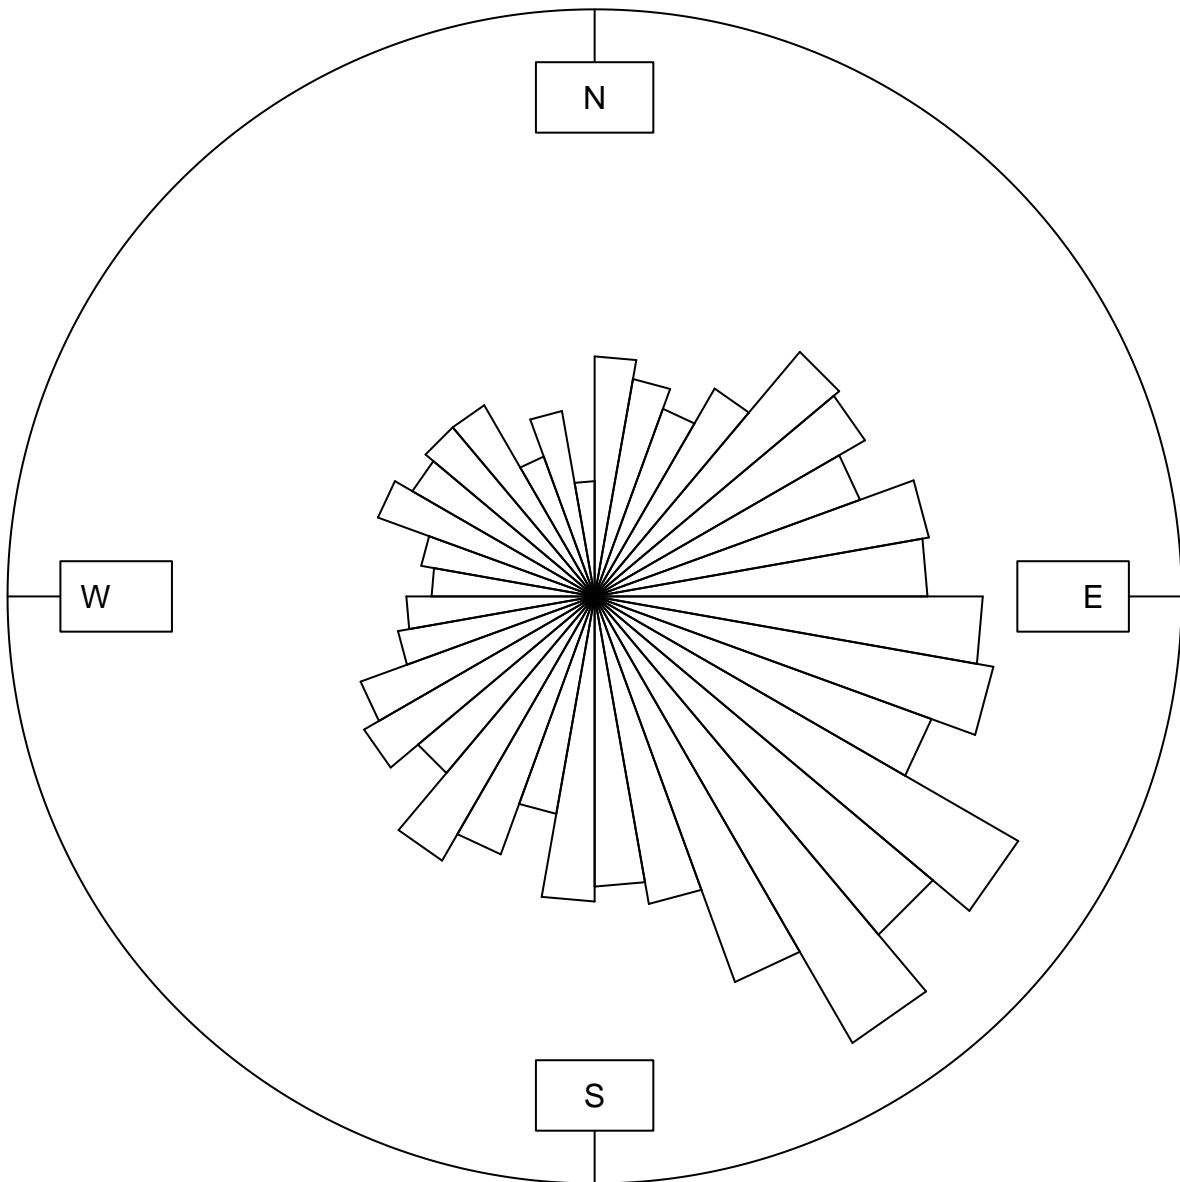

# bootstrap 93

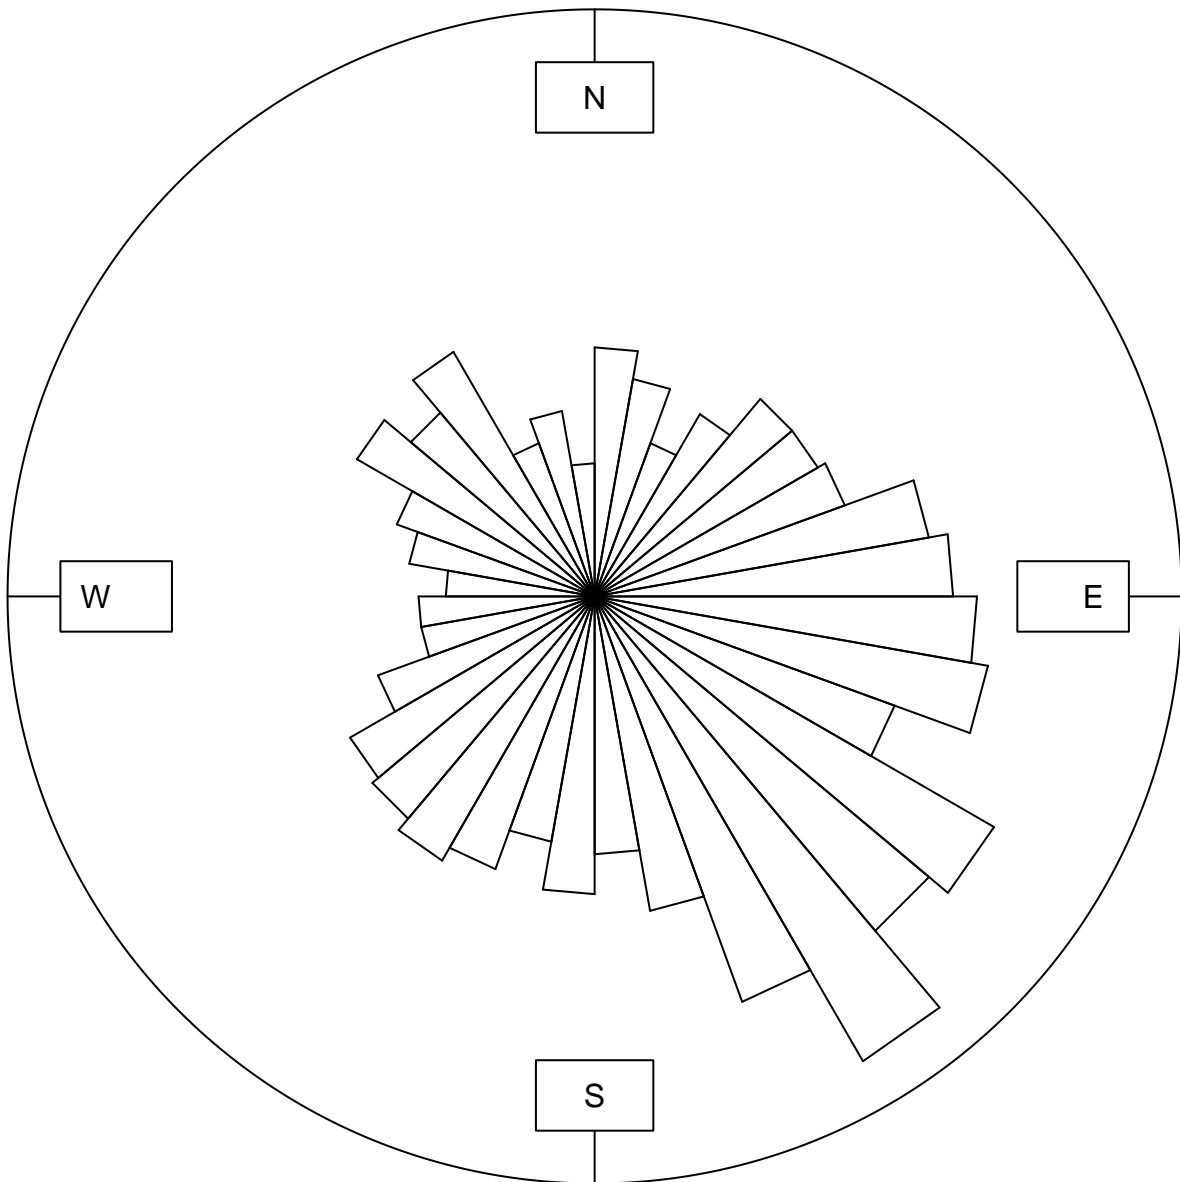

# bootstrap 94

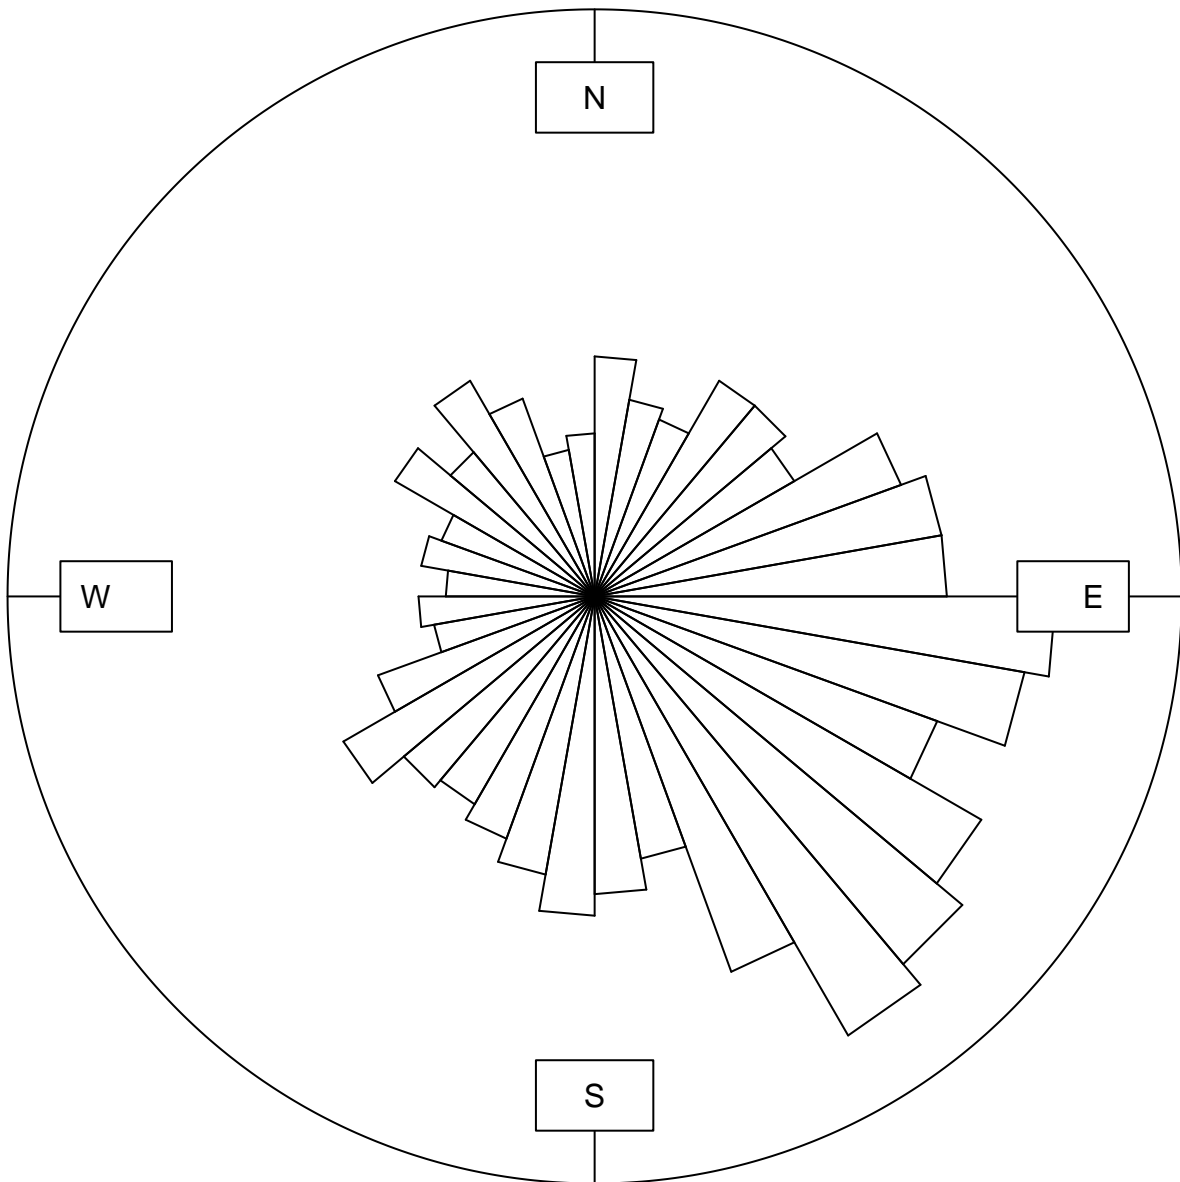

**bootstrap 95**

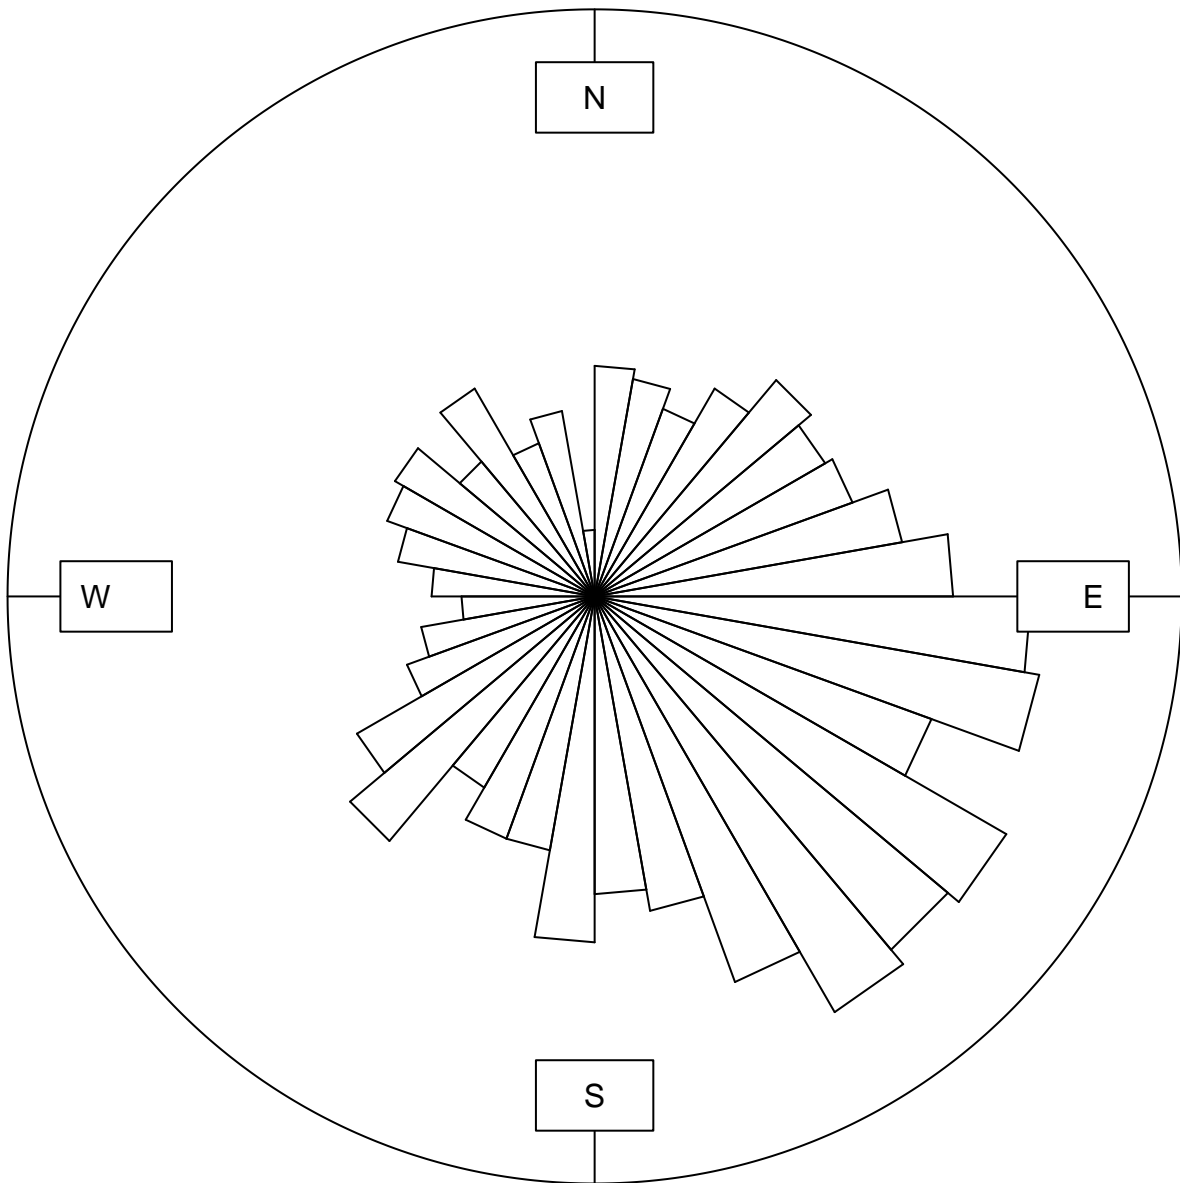

# bootstrap 96

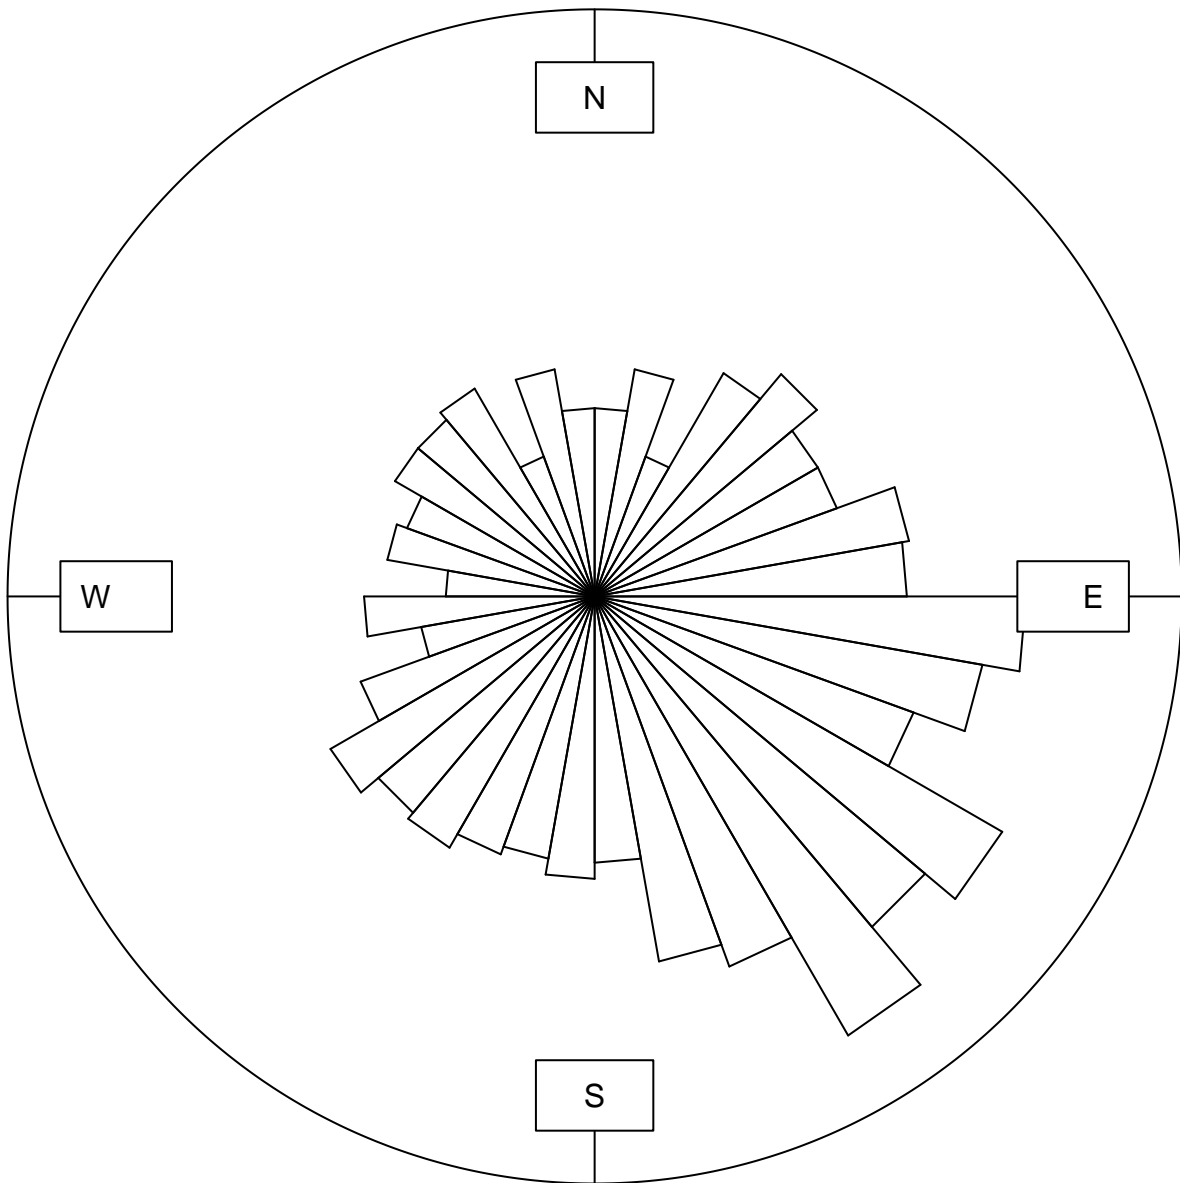



**bootstrap 97**

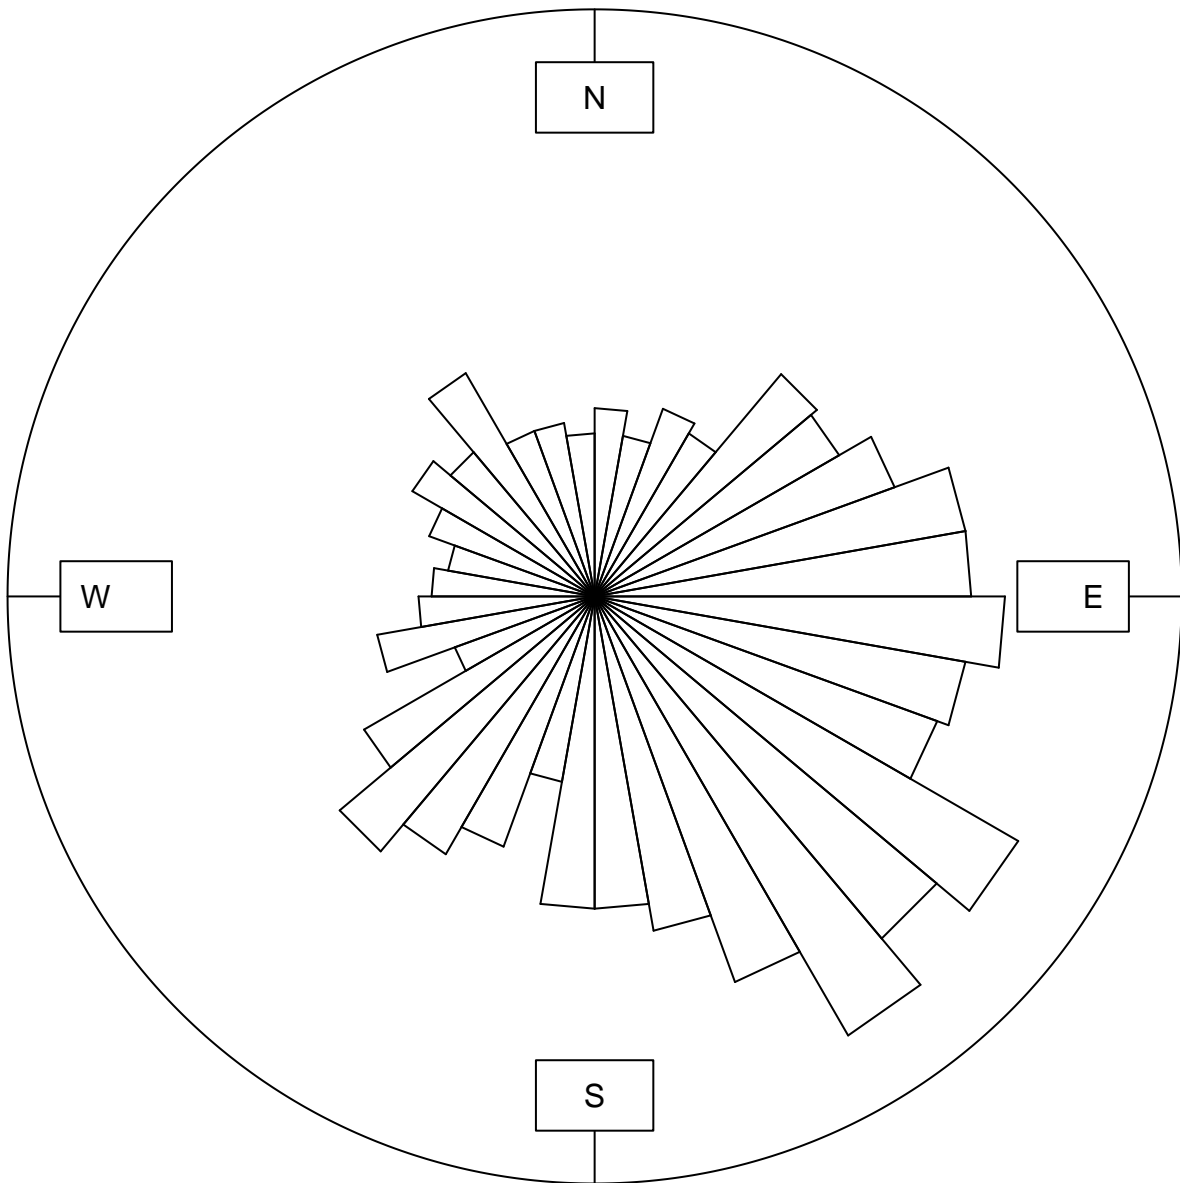

# bootstrap 98

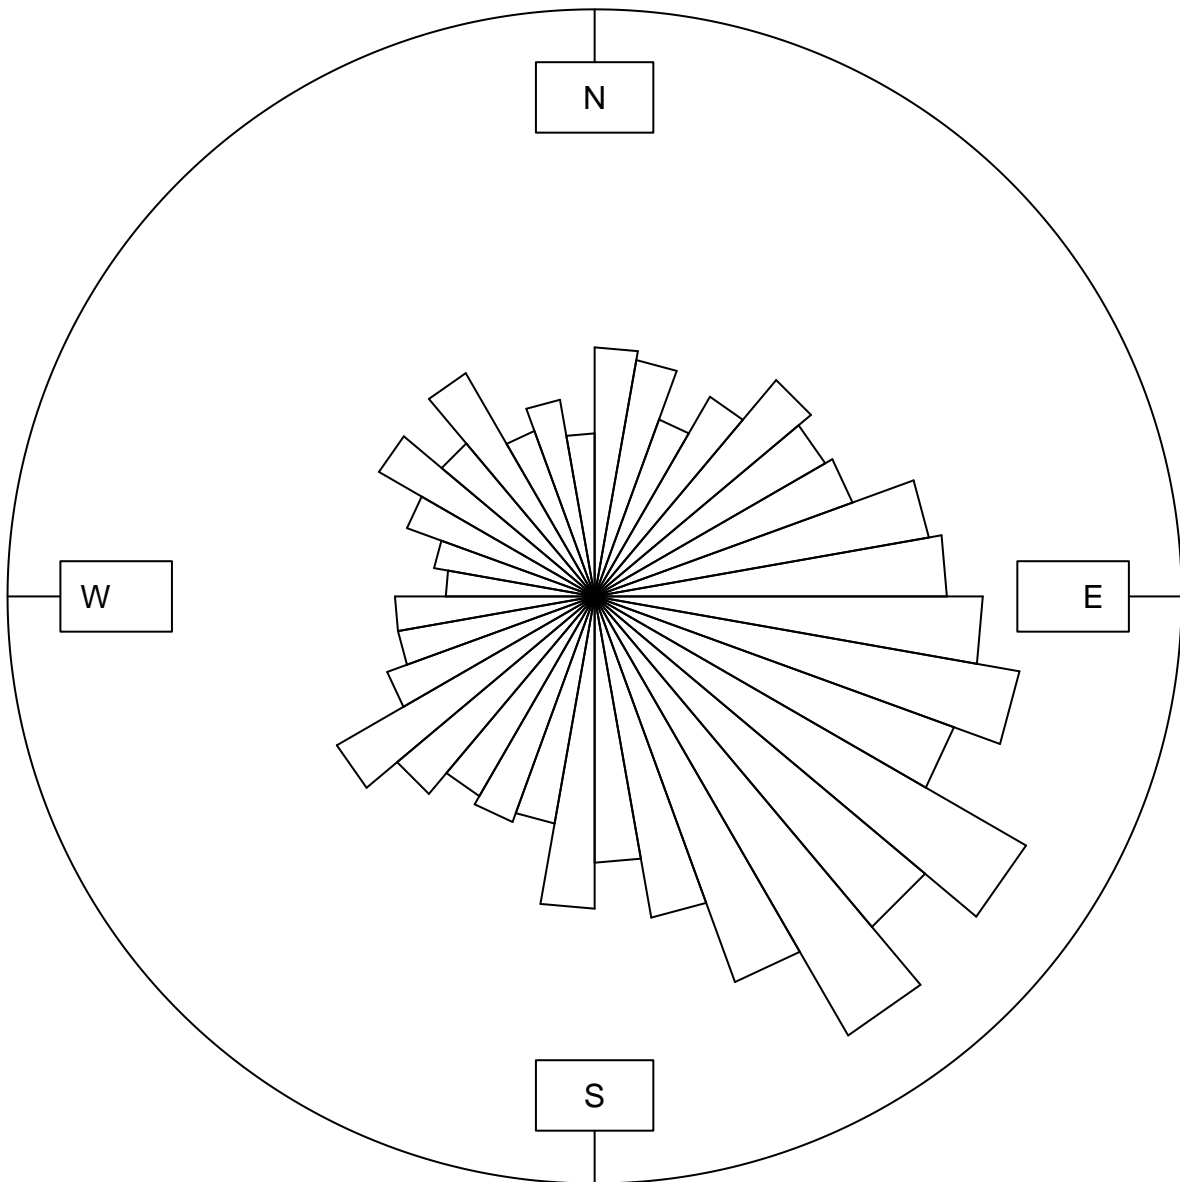

**bootstrap 99**

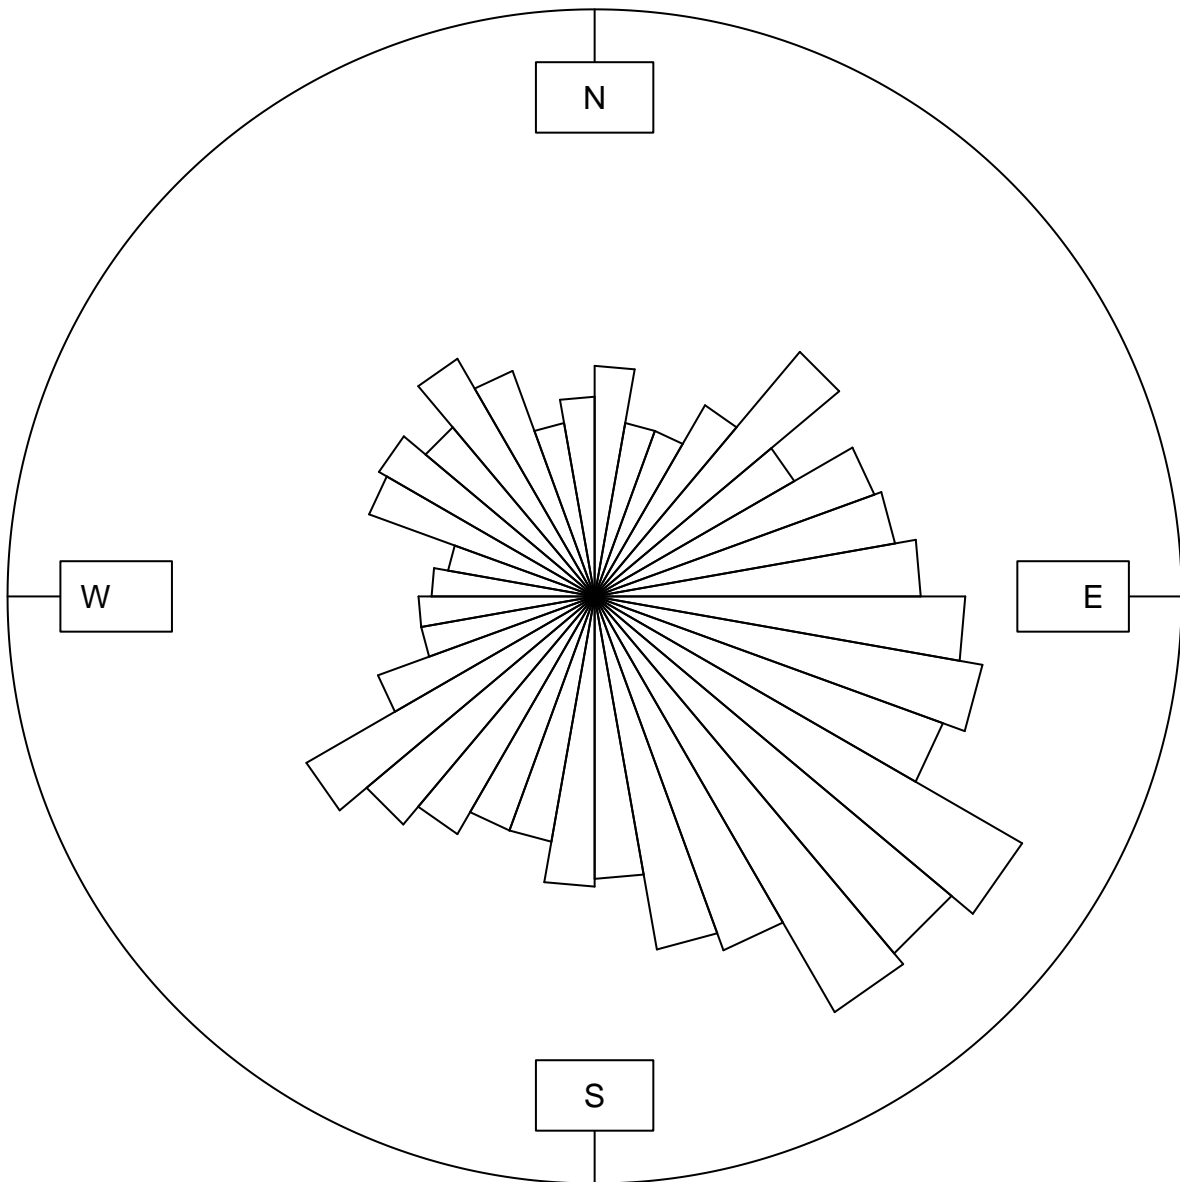

**bootstrap 100**

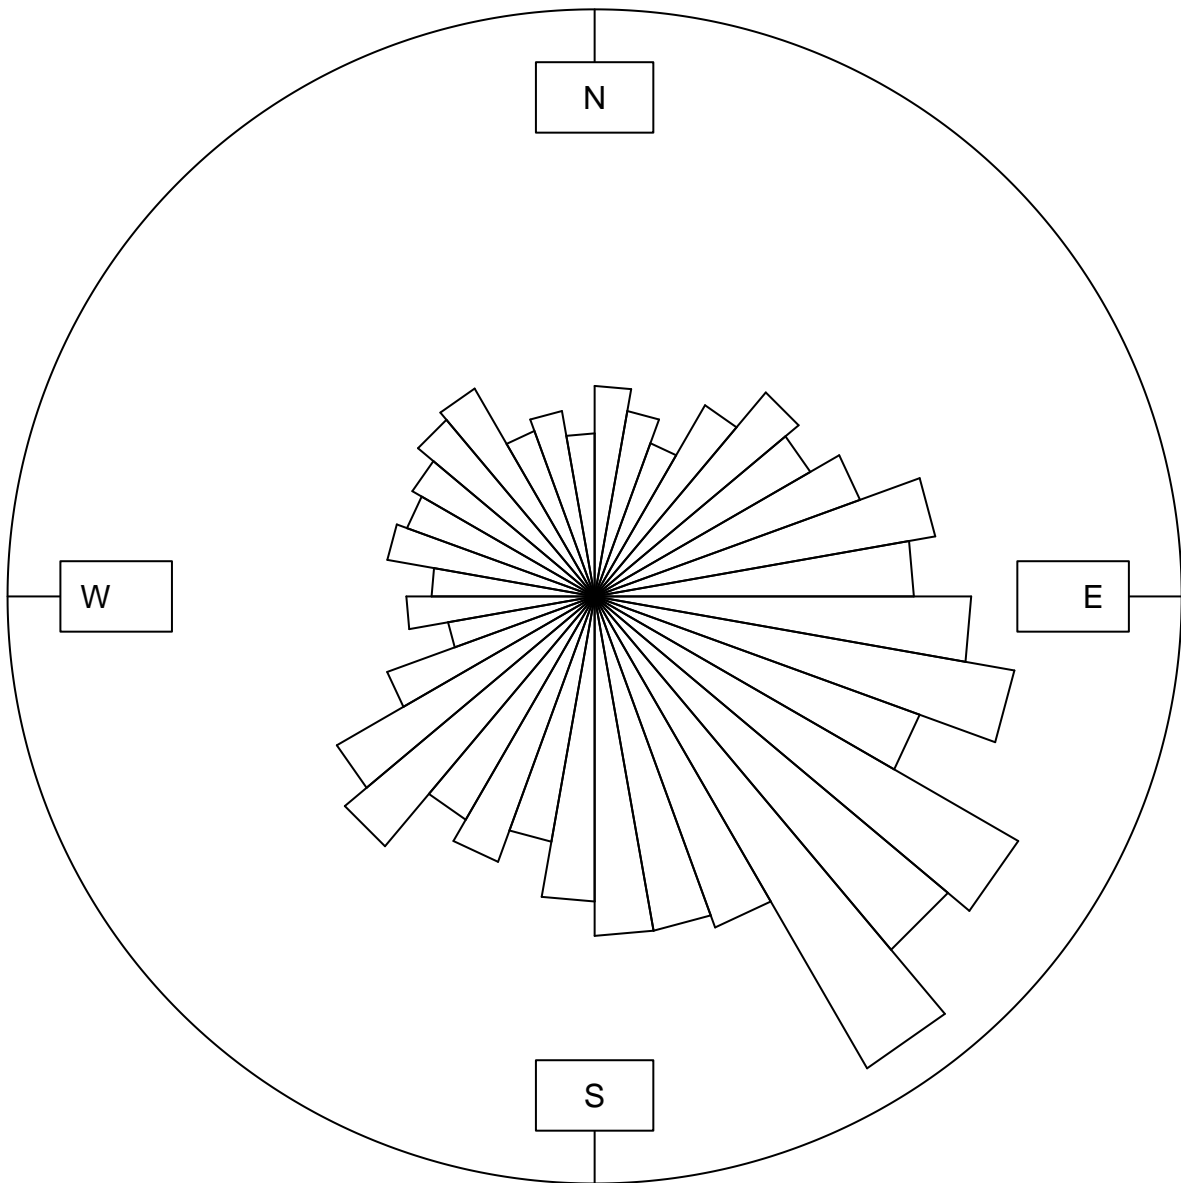

# bootstrap 101

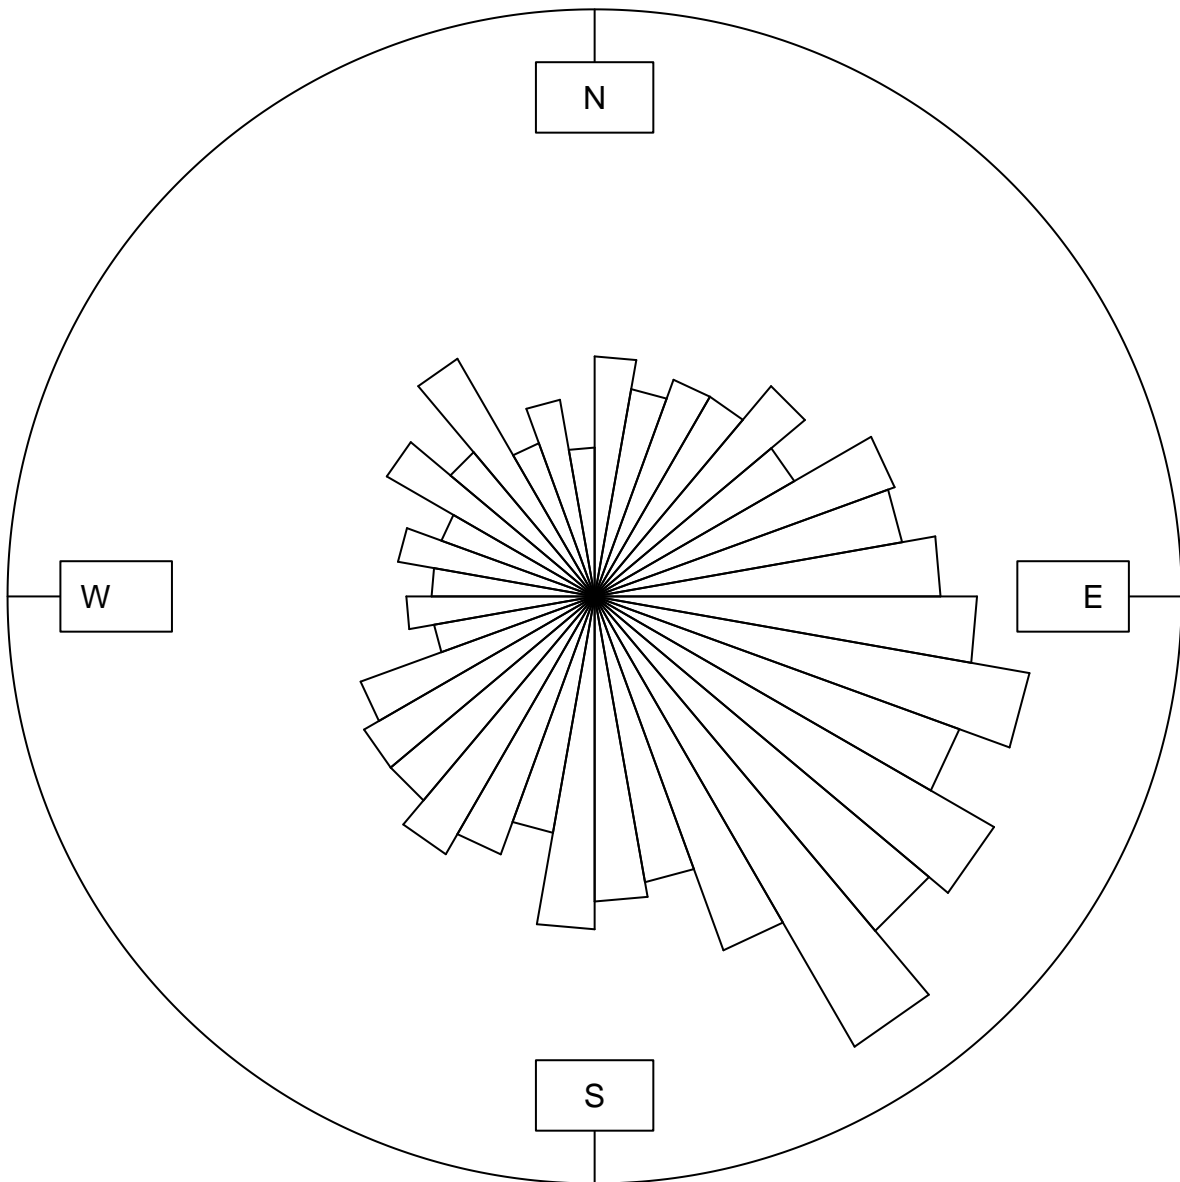

# bootstrap 102

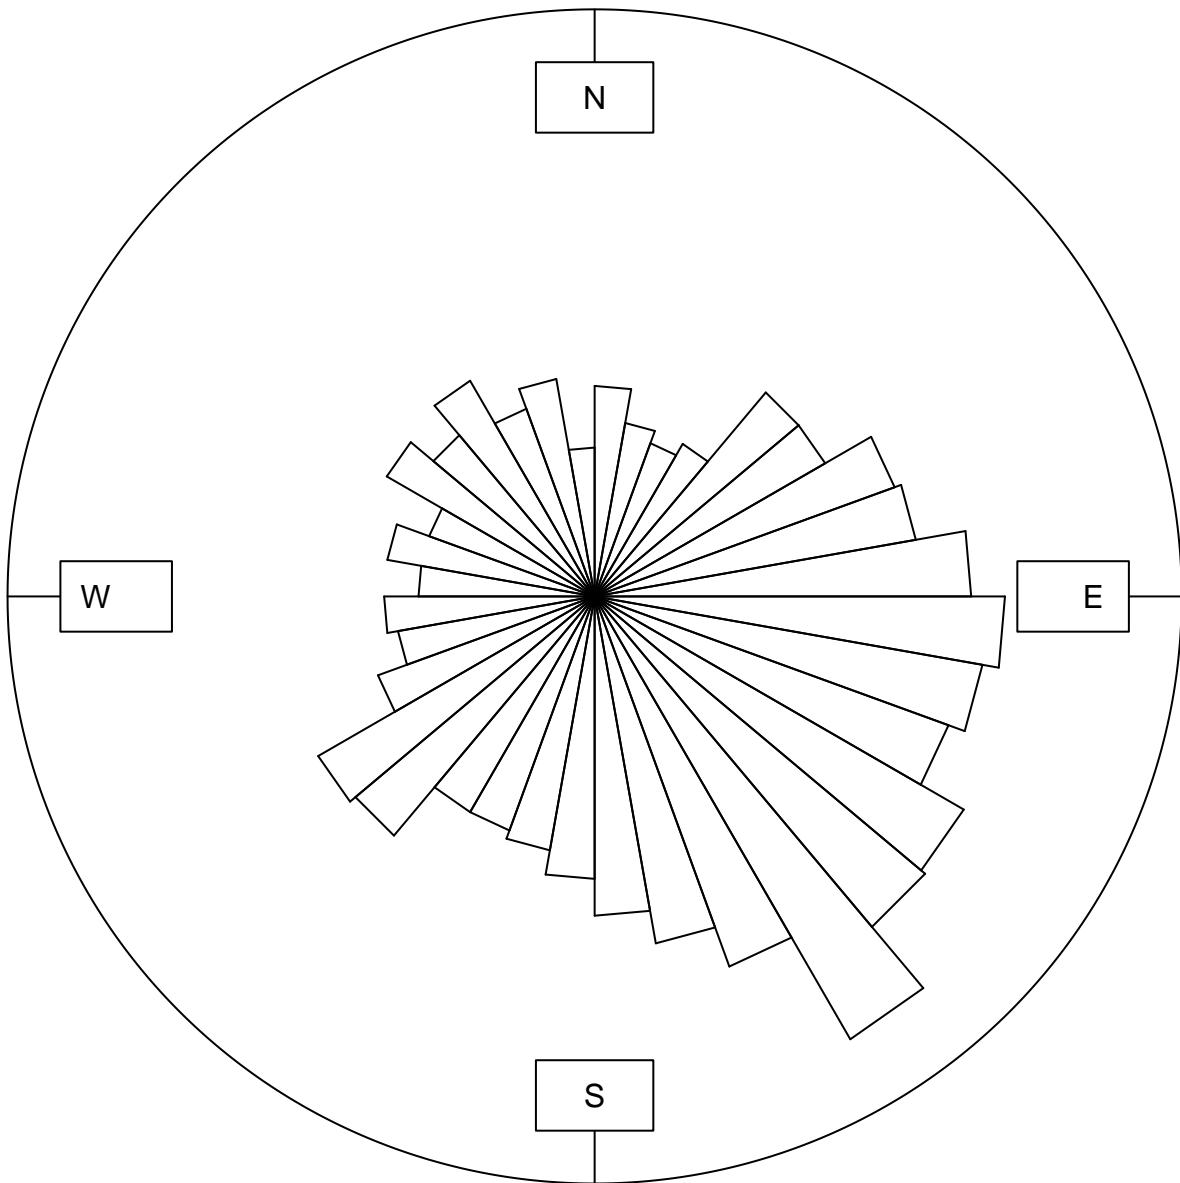

# bootstrap 103

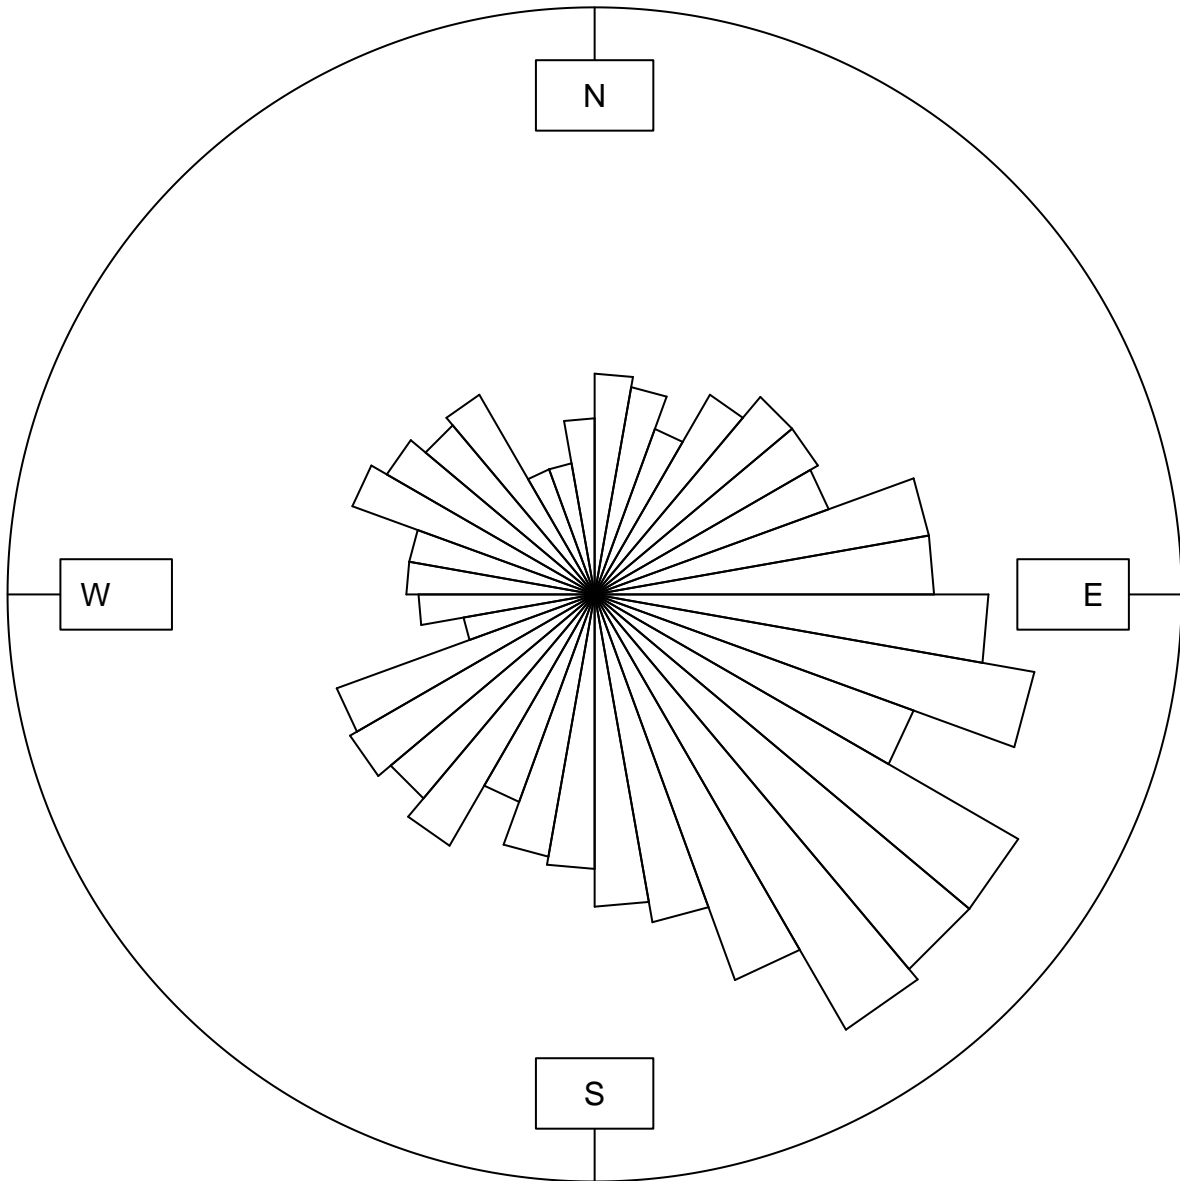

# bootstrap 104

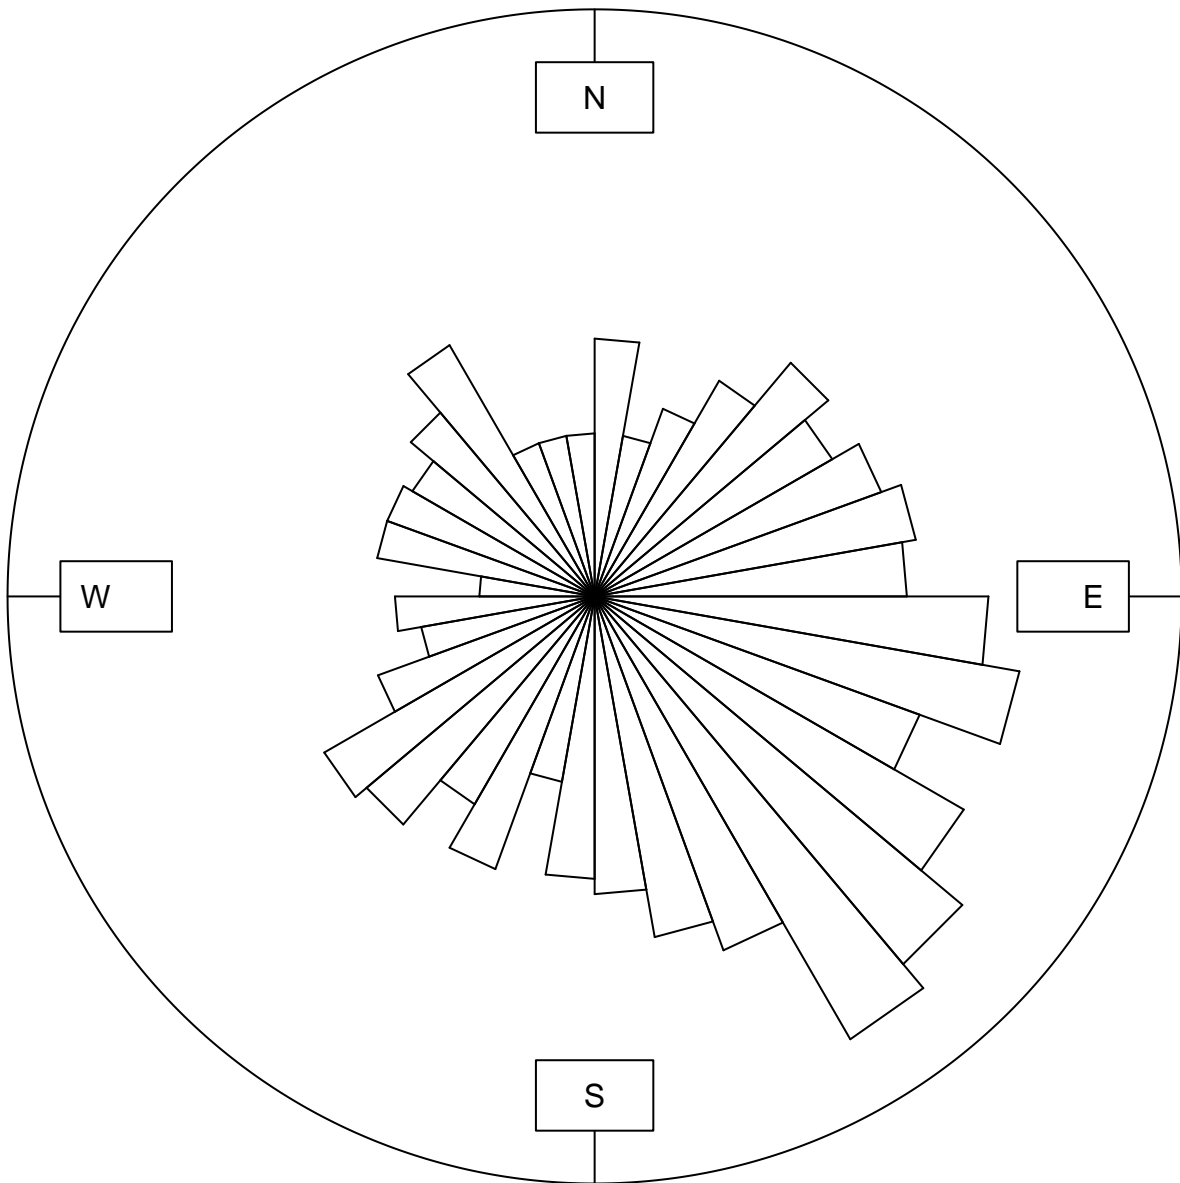



# bootstrap 105

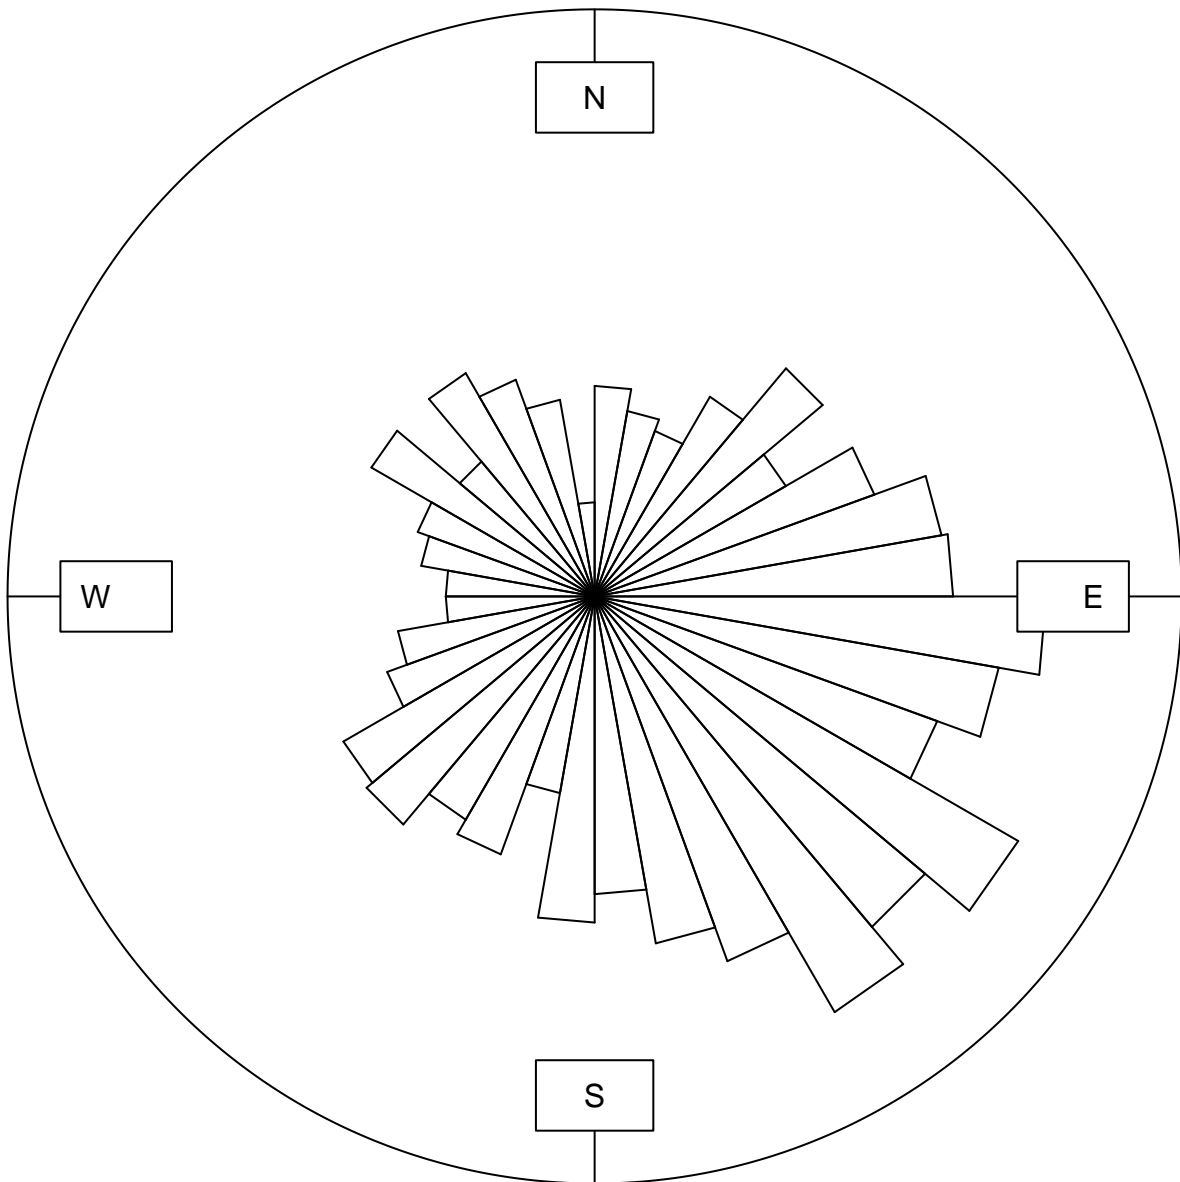

# bootstrap 106

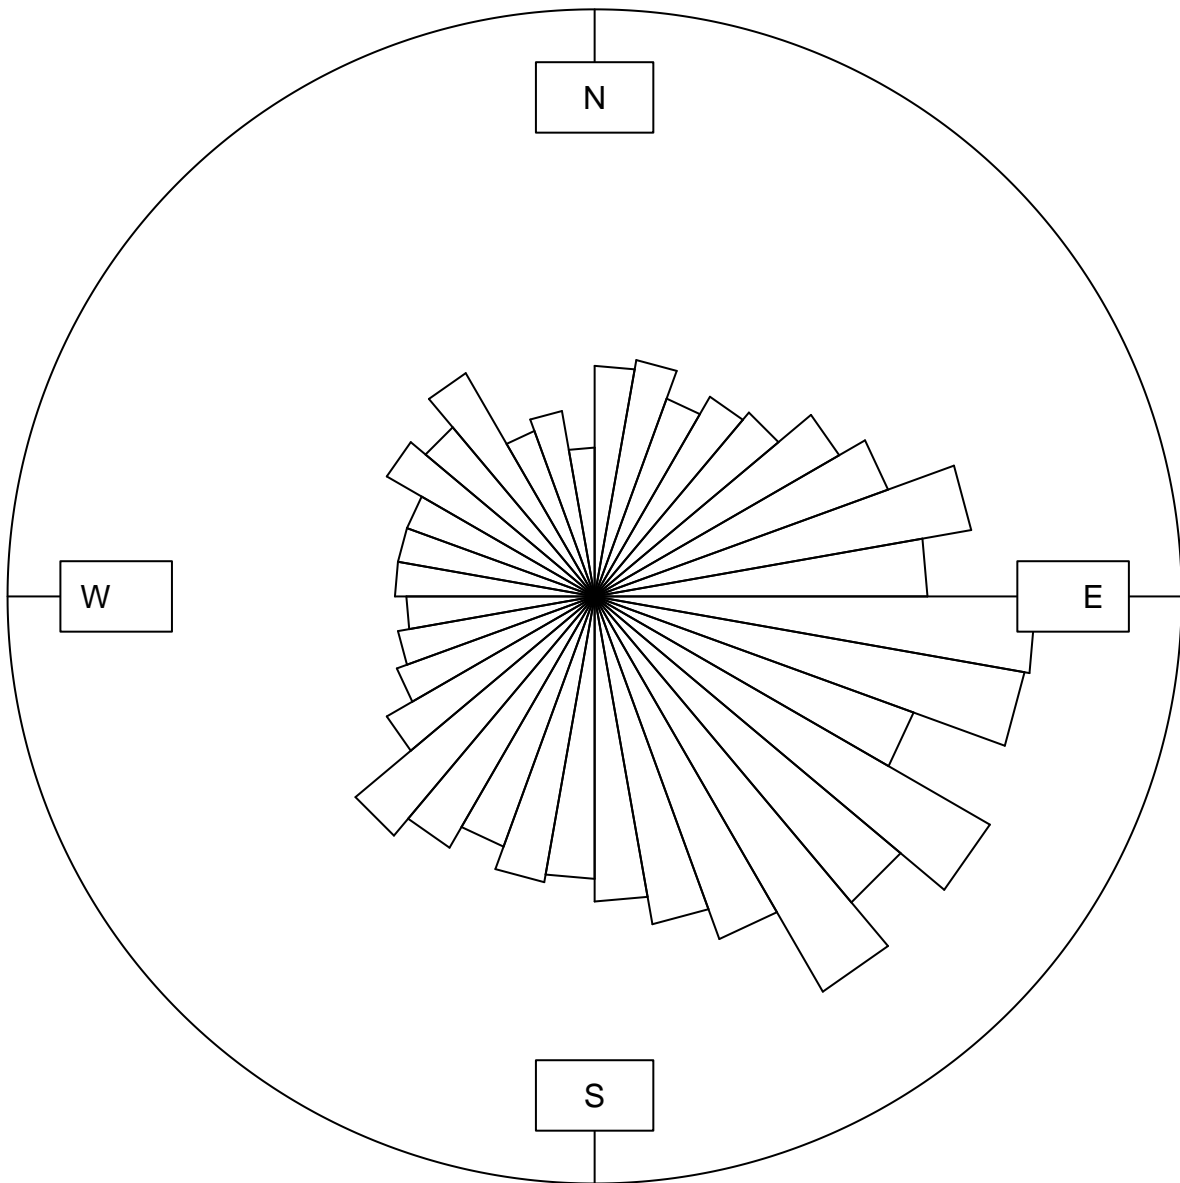

# bootstrap 107

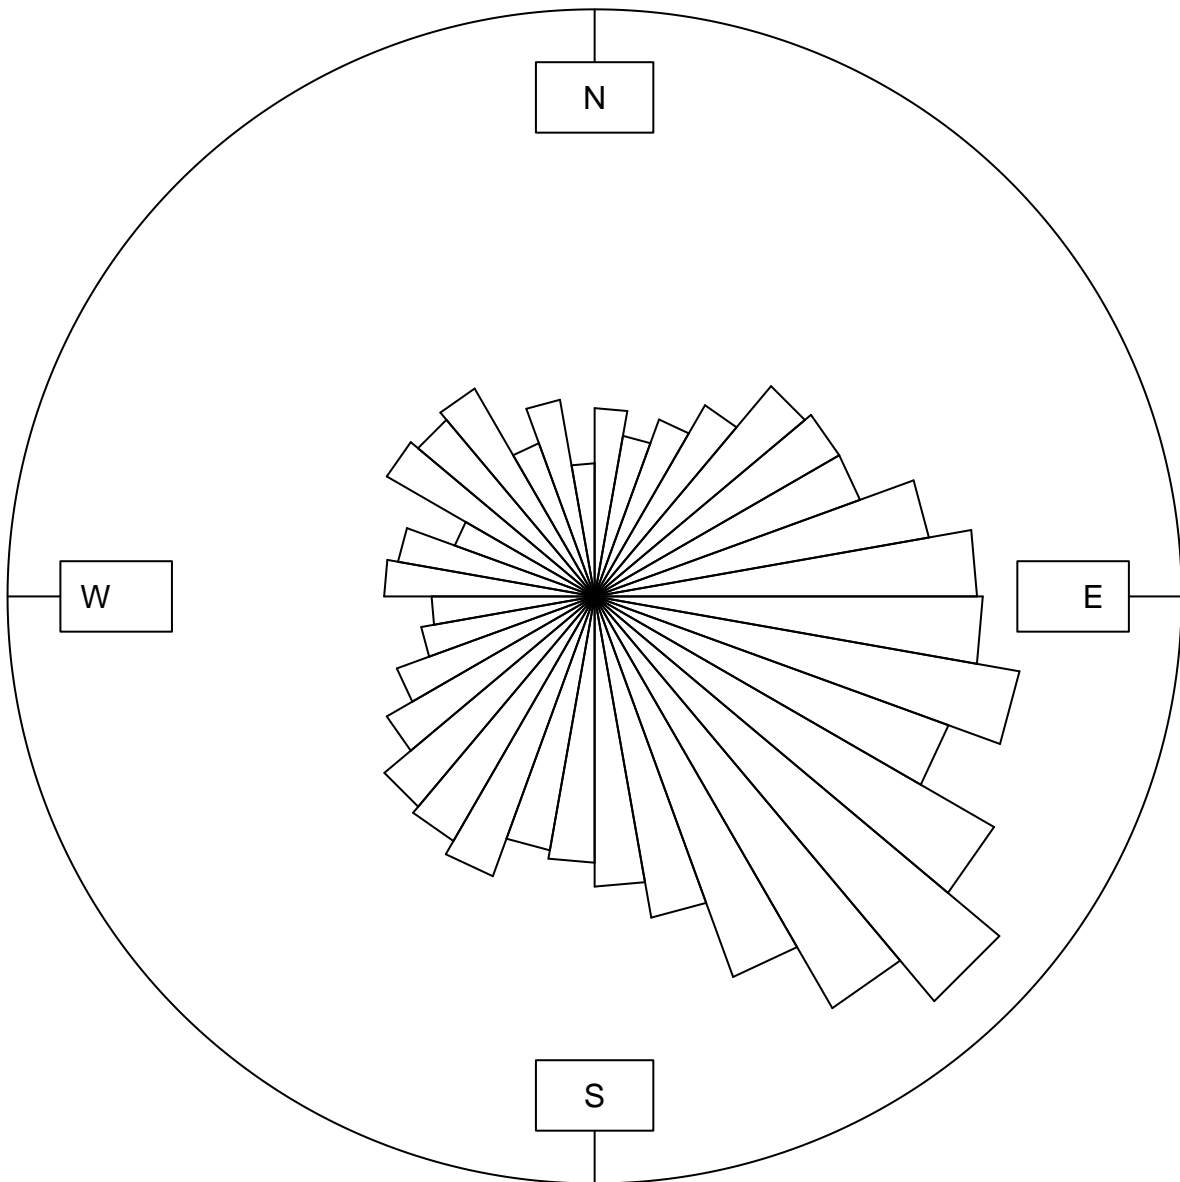

# bootstrap 108

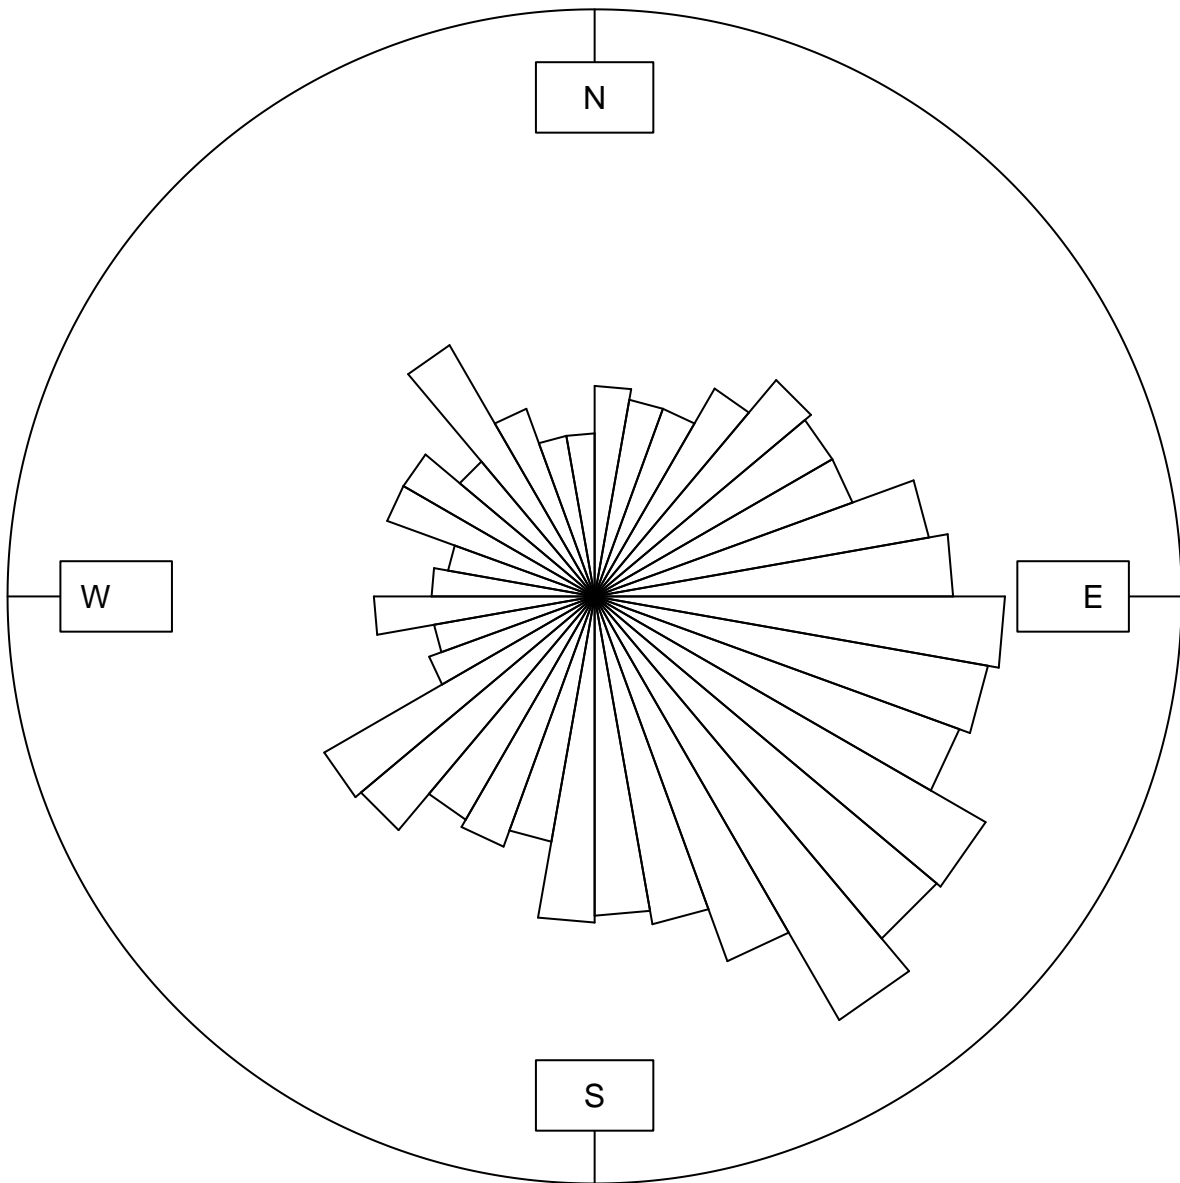

**bootstrap 109**

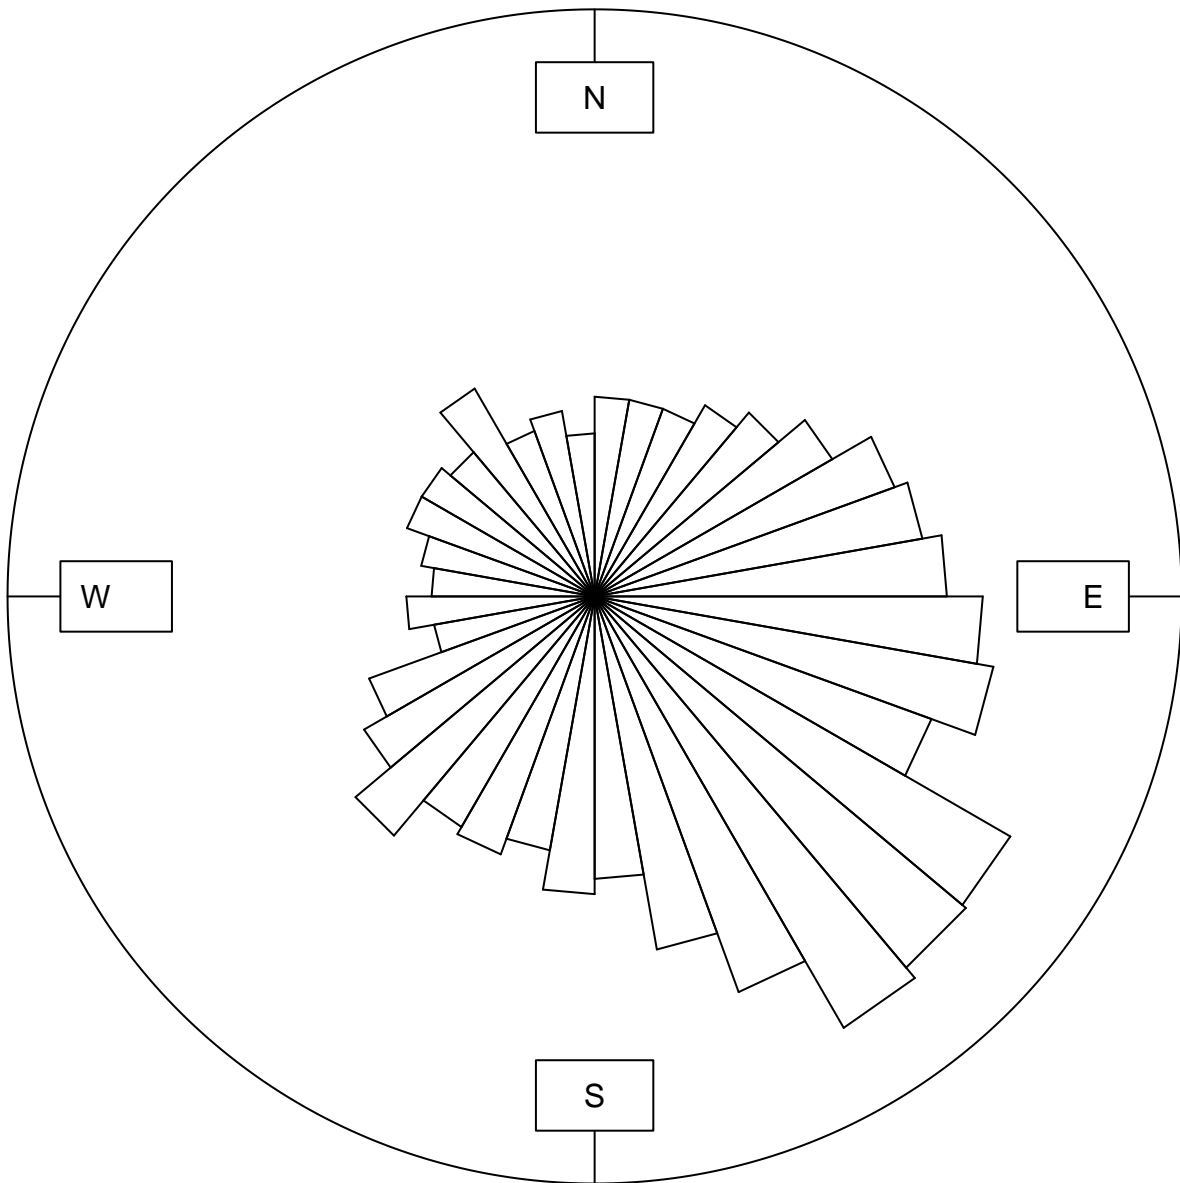

# bootstrap 110

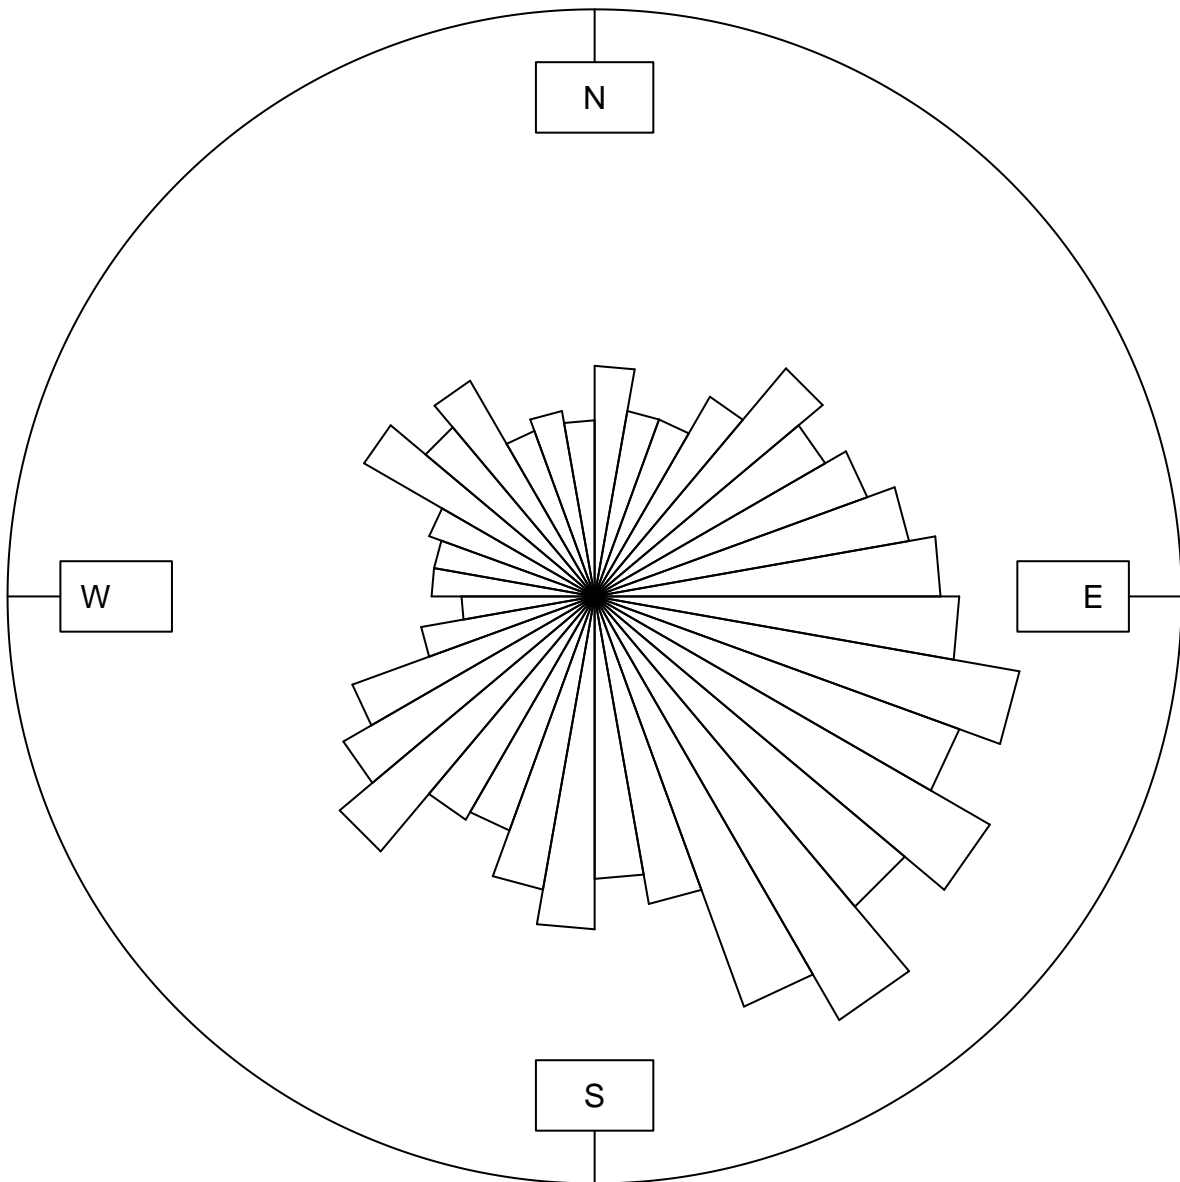

# bootstrap 111

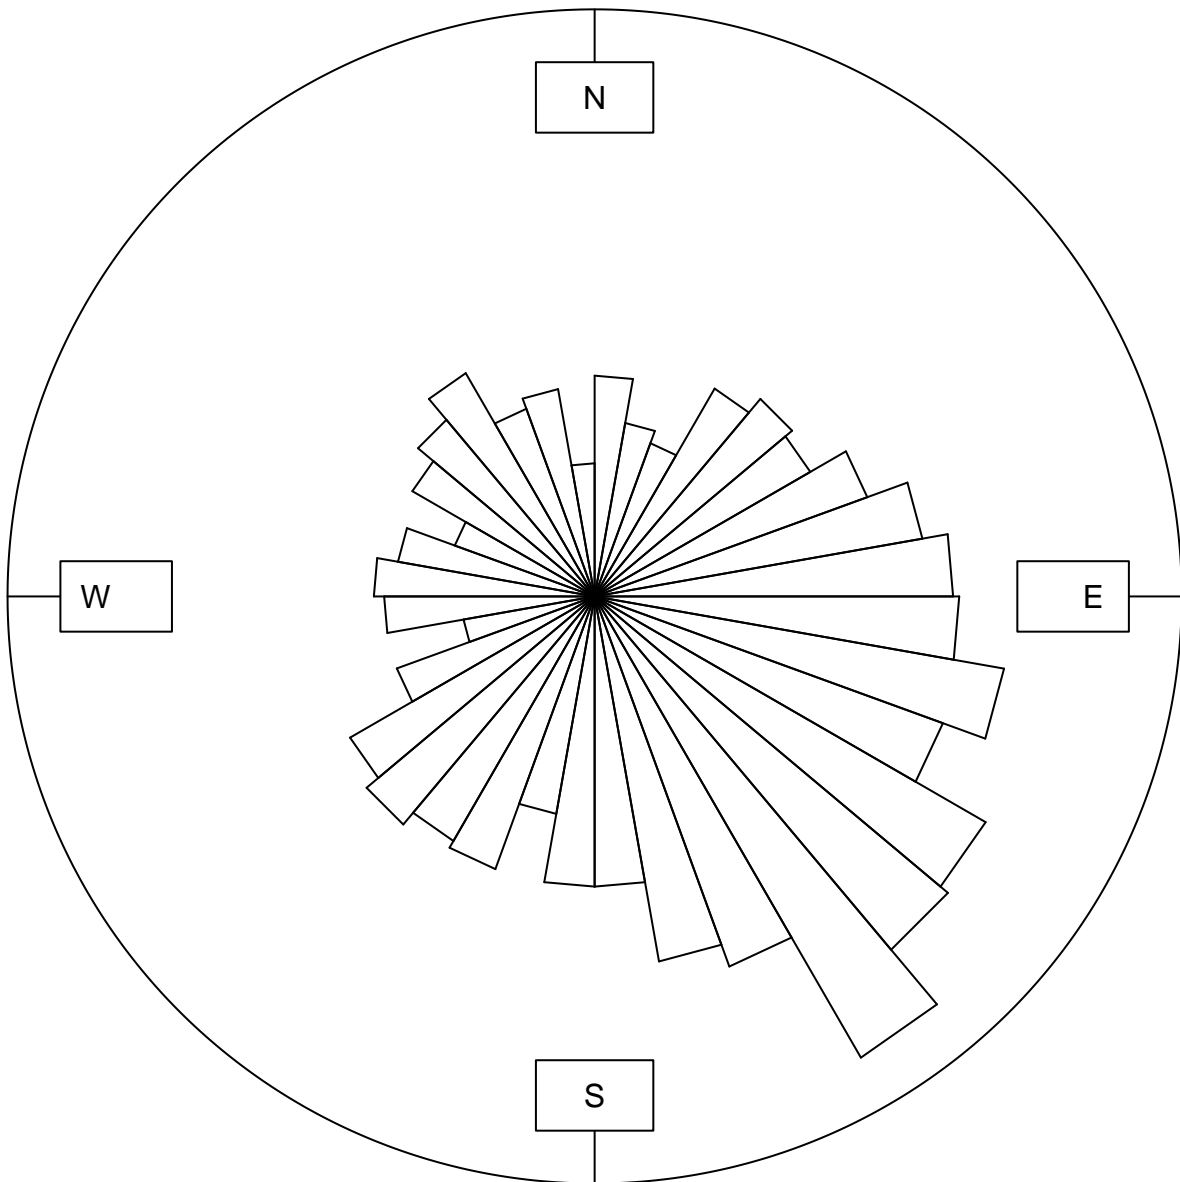

# bootstrap 112

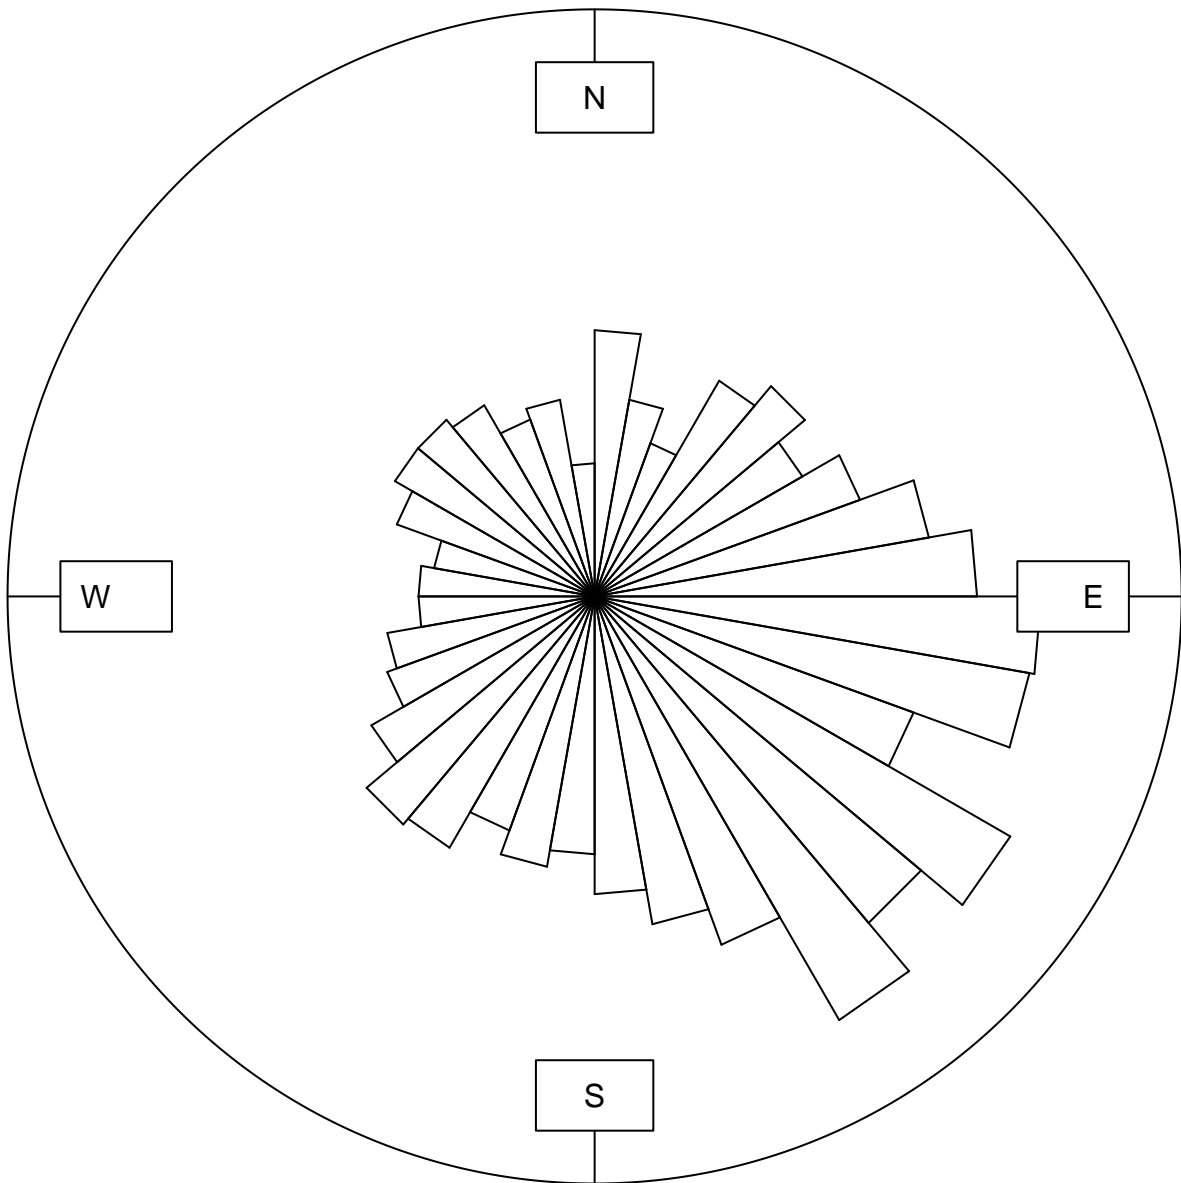



# bootstrap 113

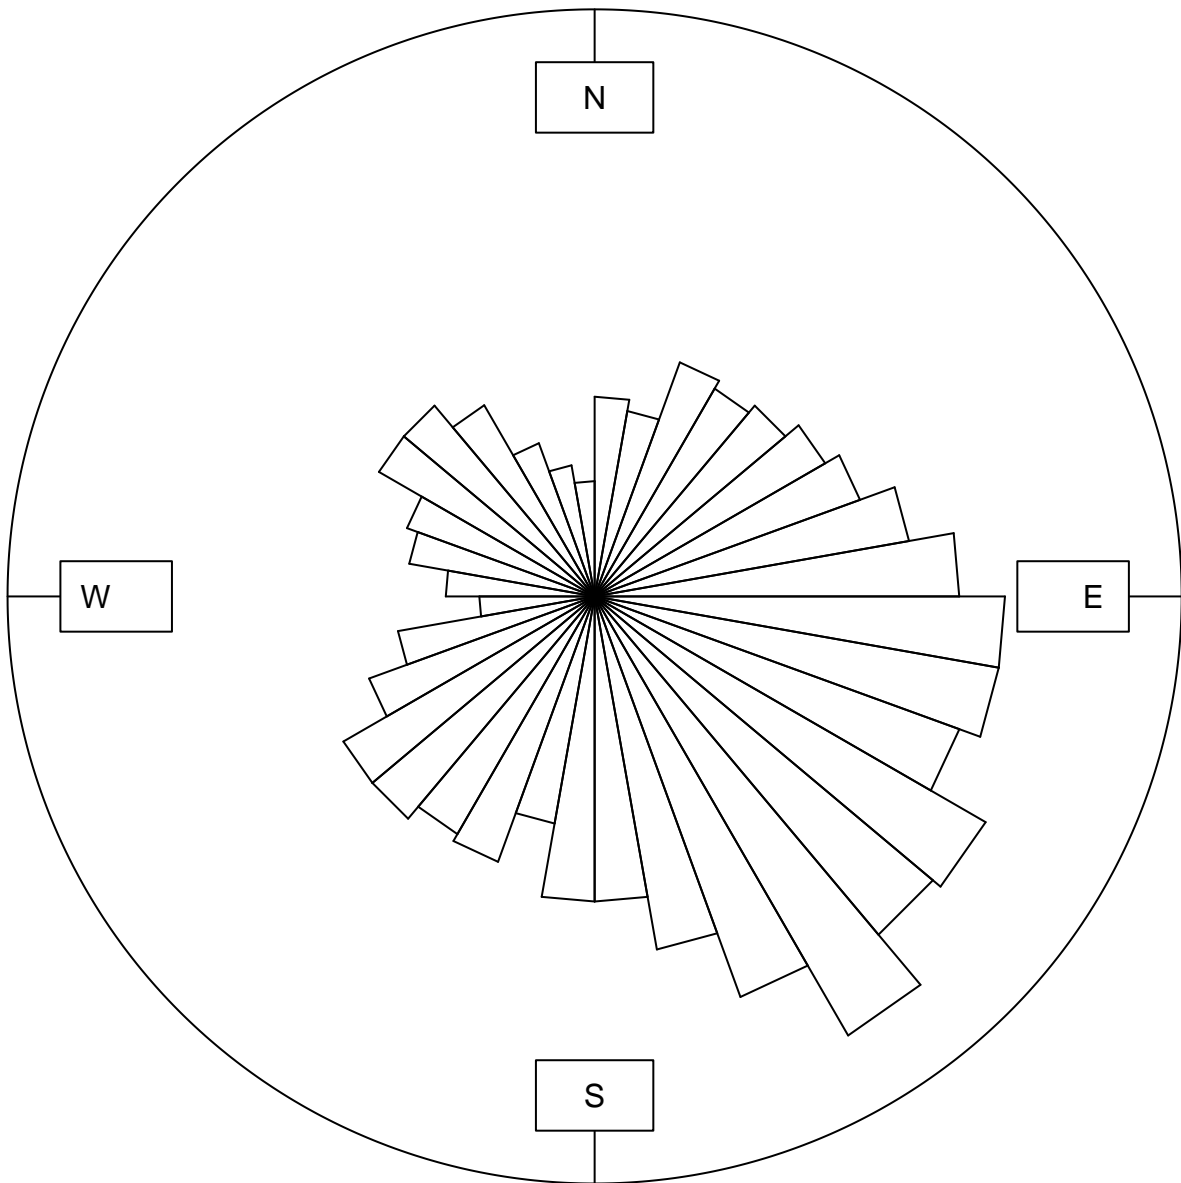

# bootstrap 114

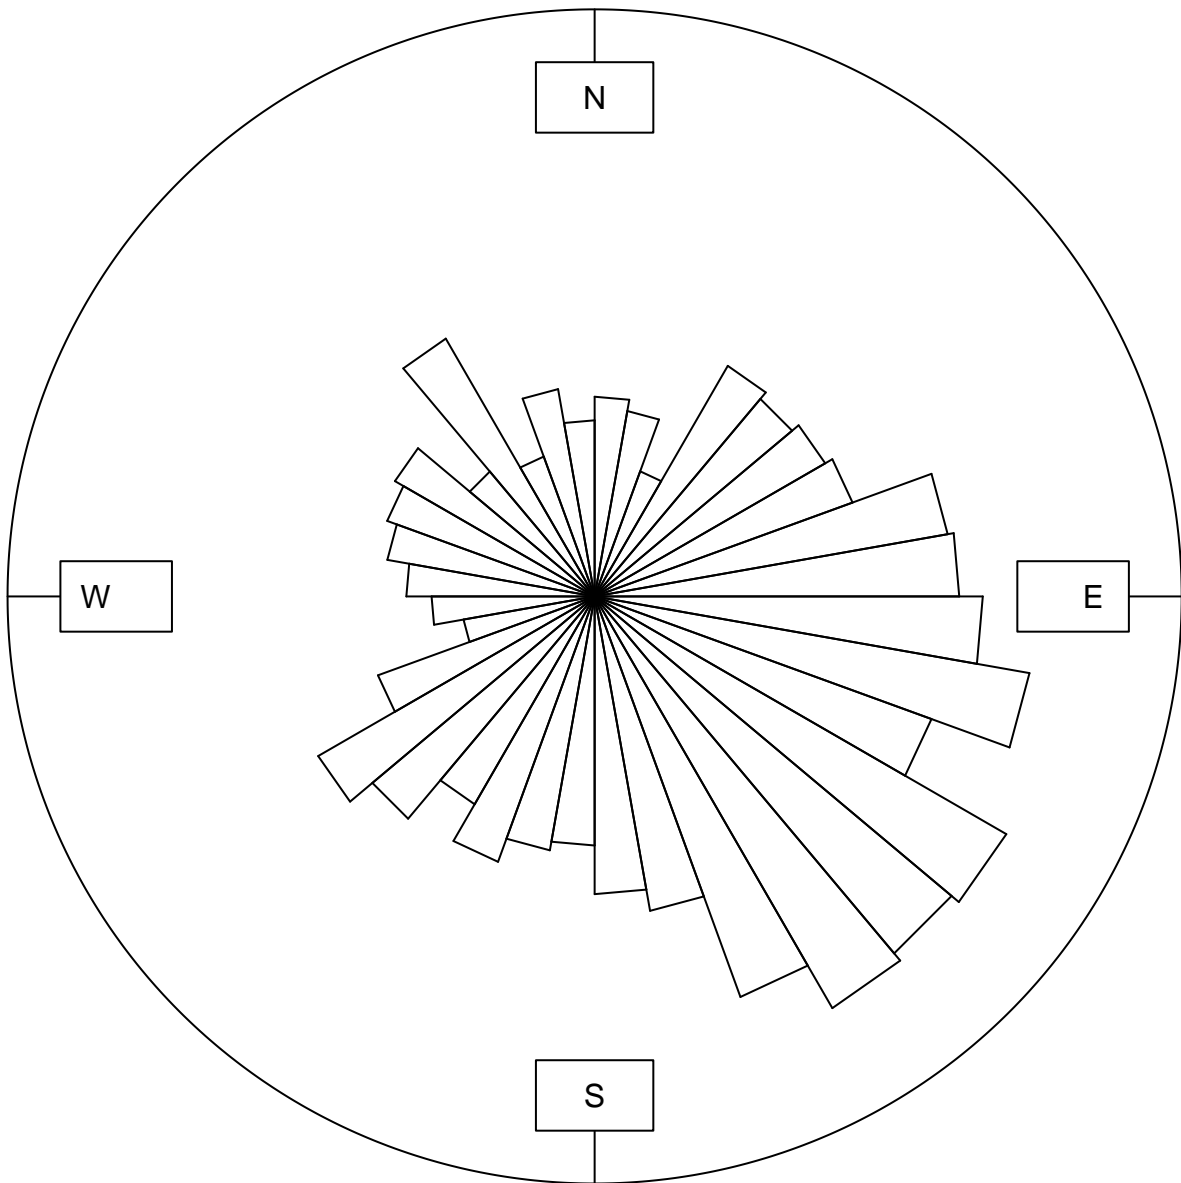

# bootstrap 115

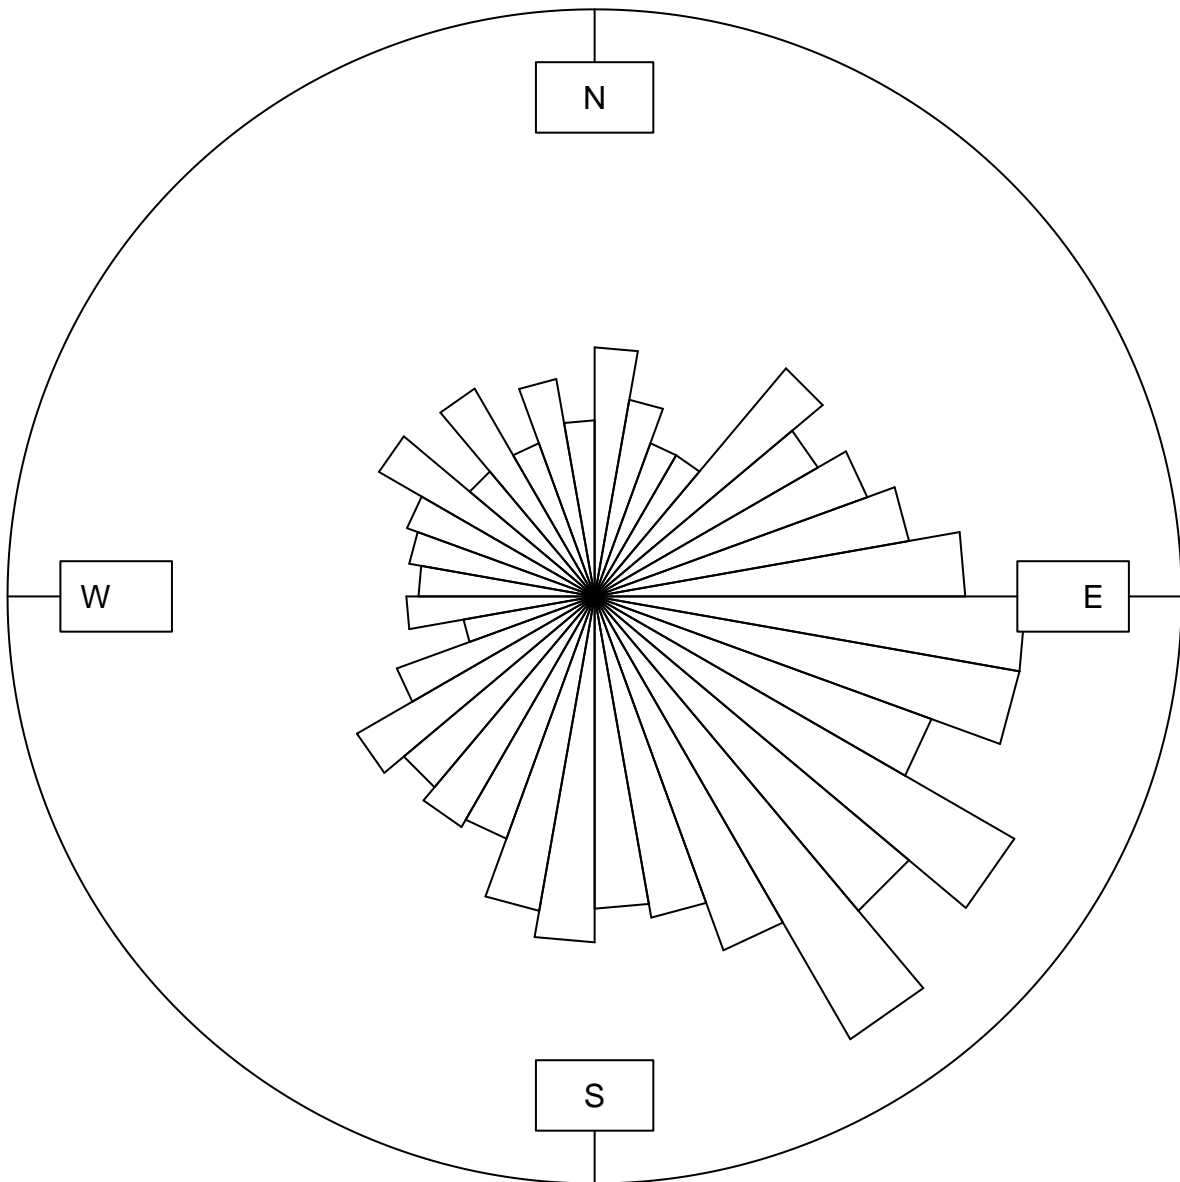

# bootstrap 116

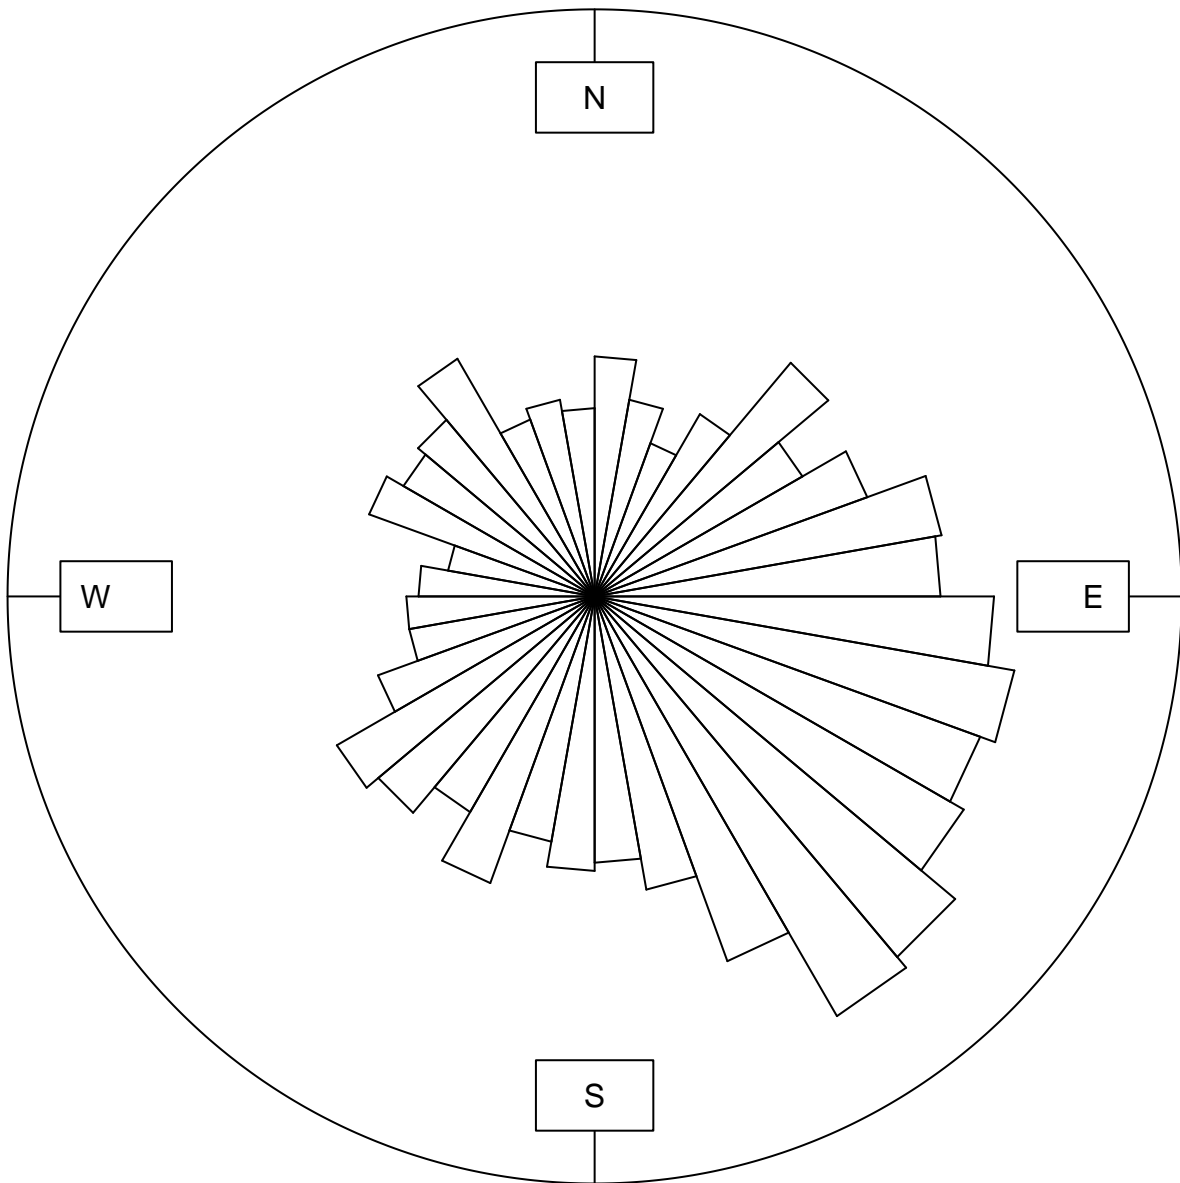

# bootstrap 117

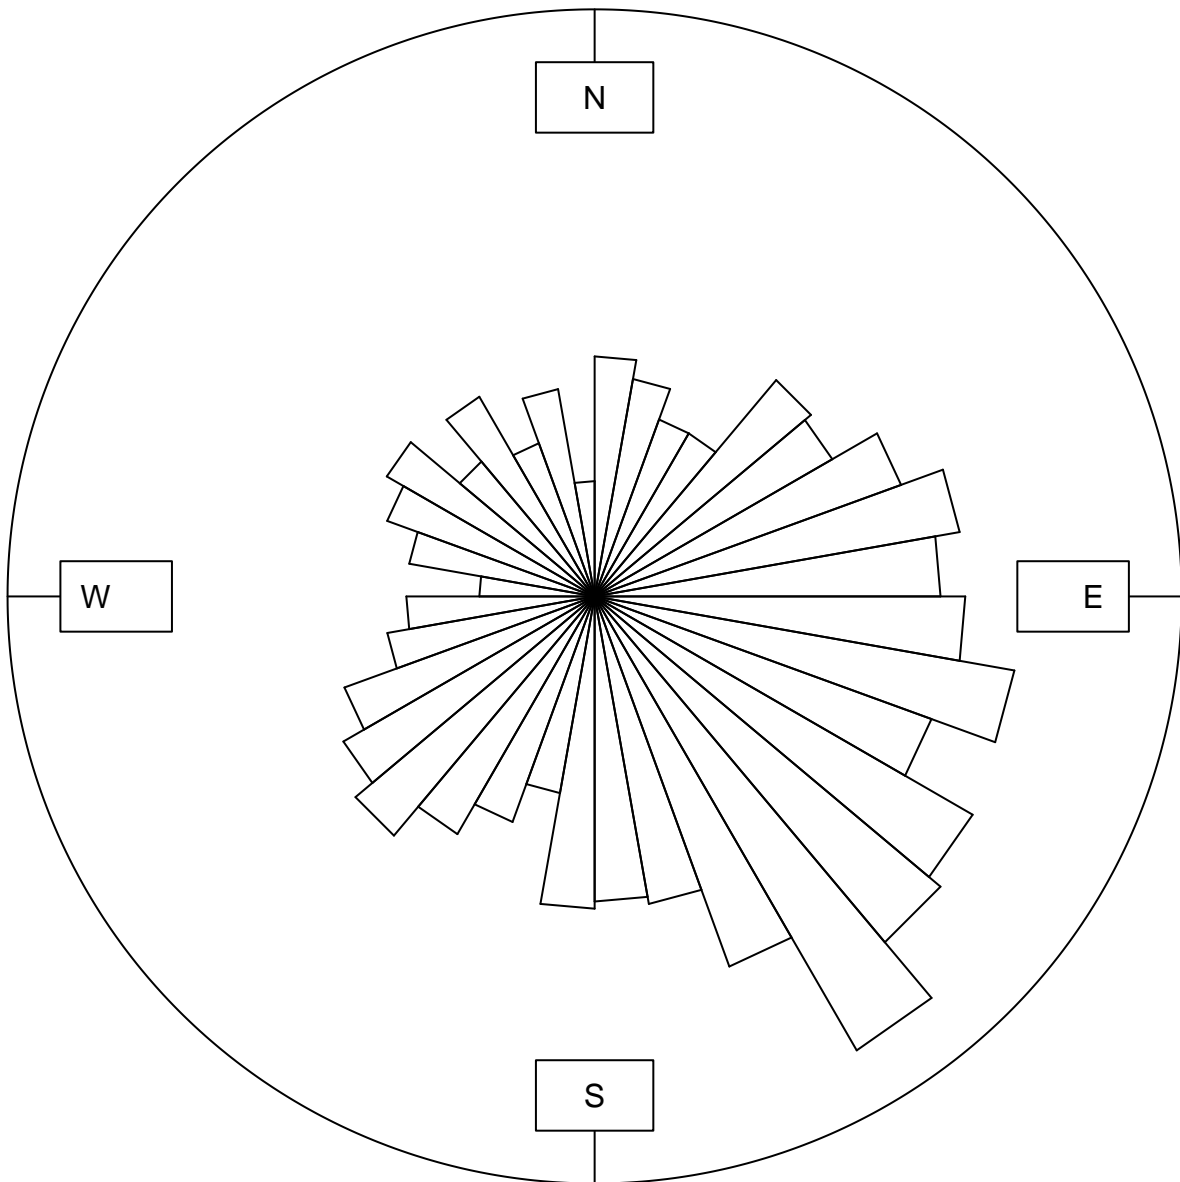

# bootstrap 118

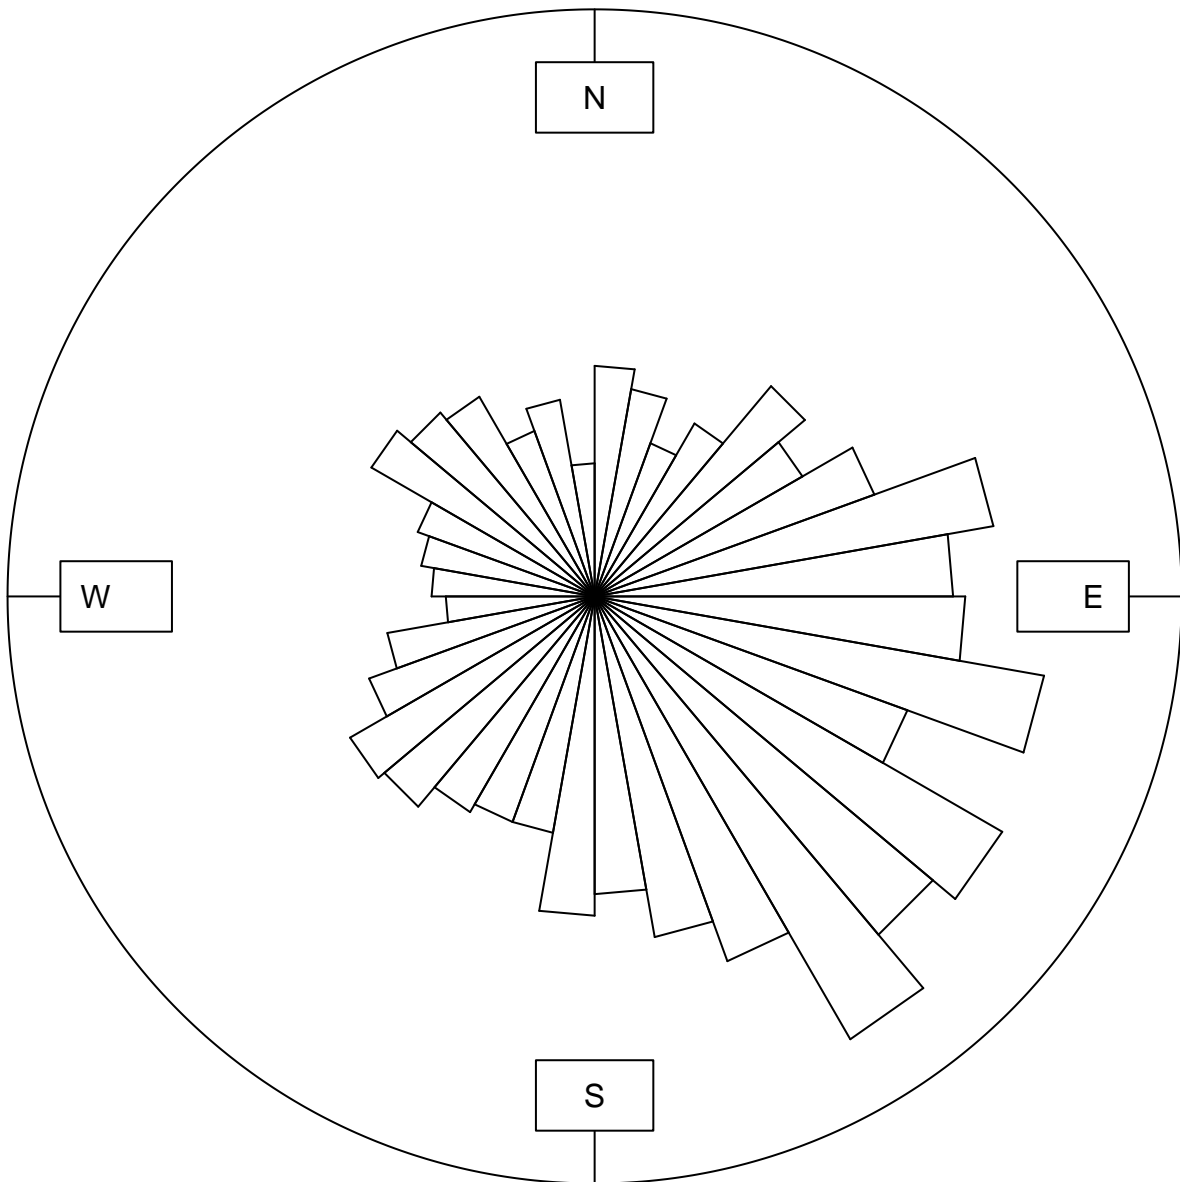

# bootstrap 119

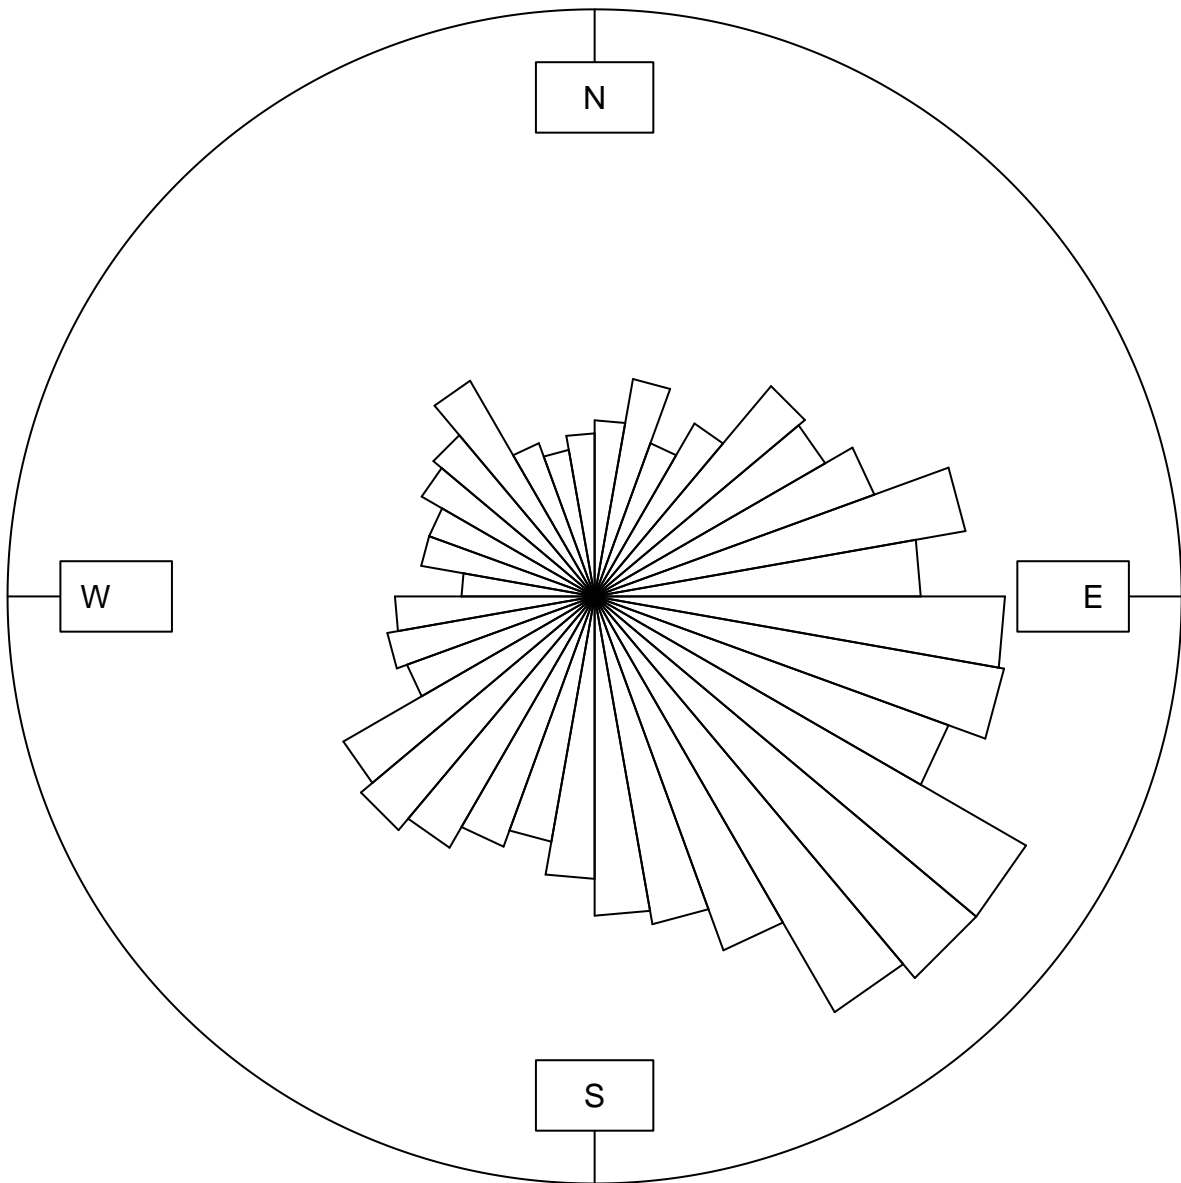

bootstrap 120

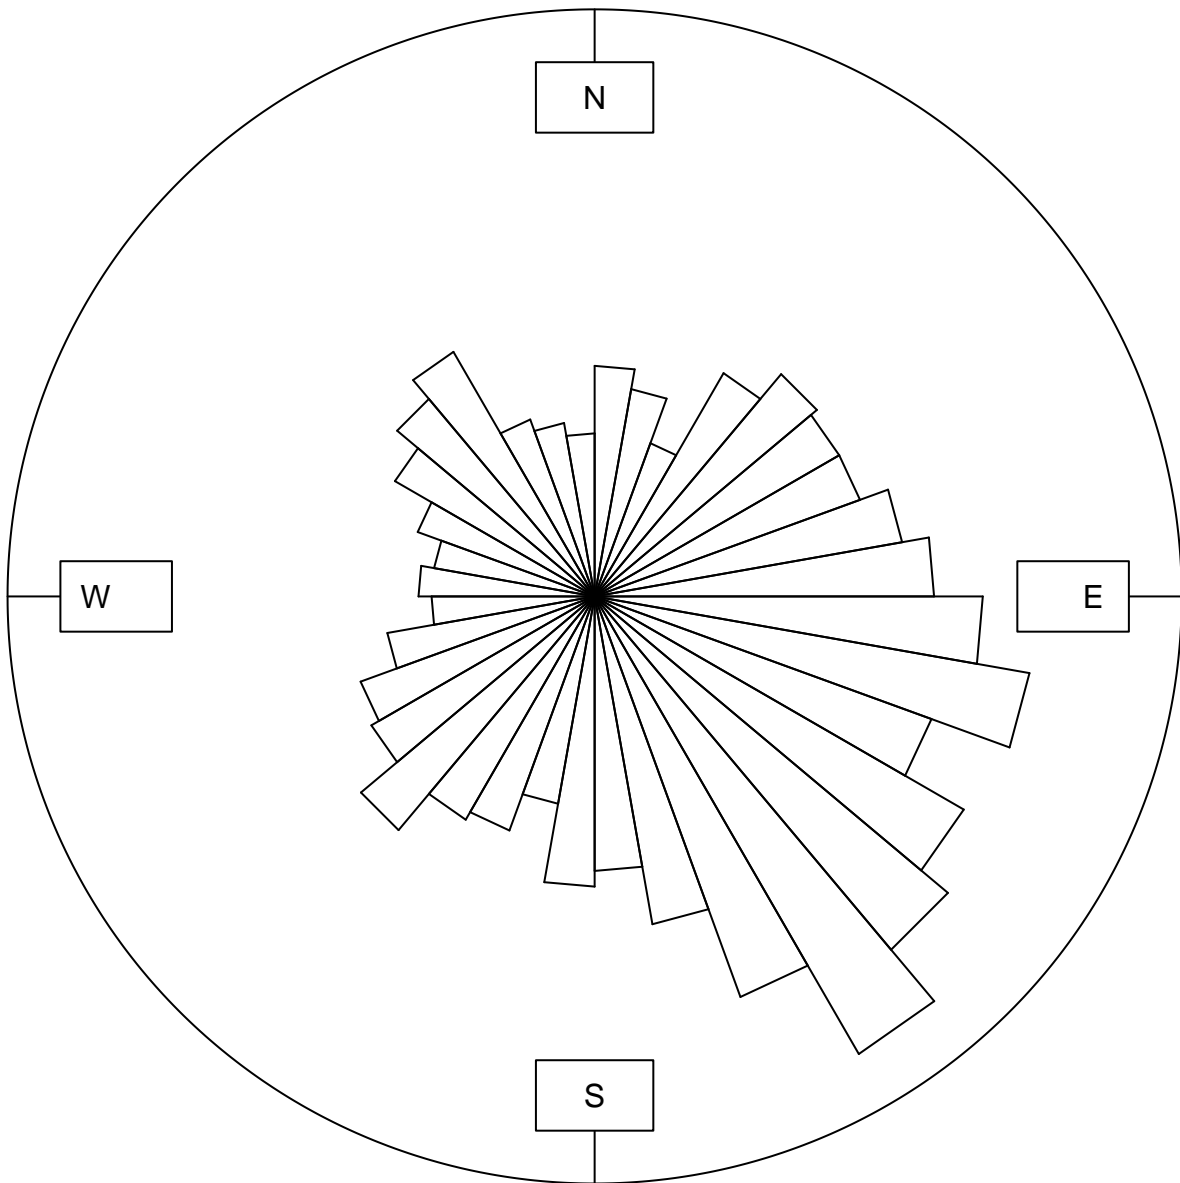



# bootstrap 121

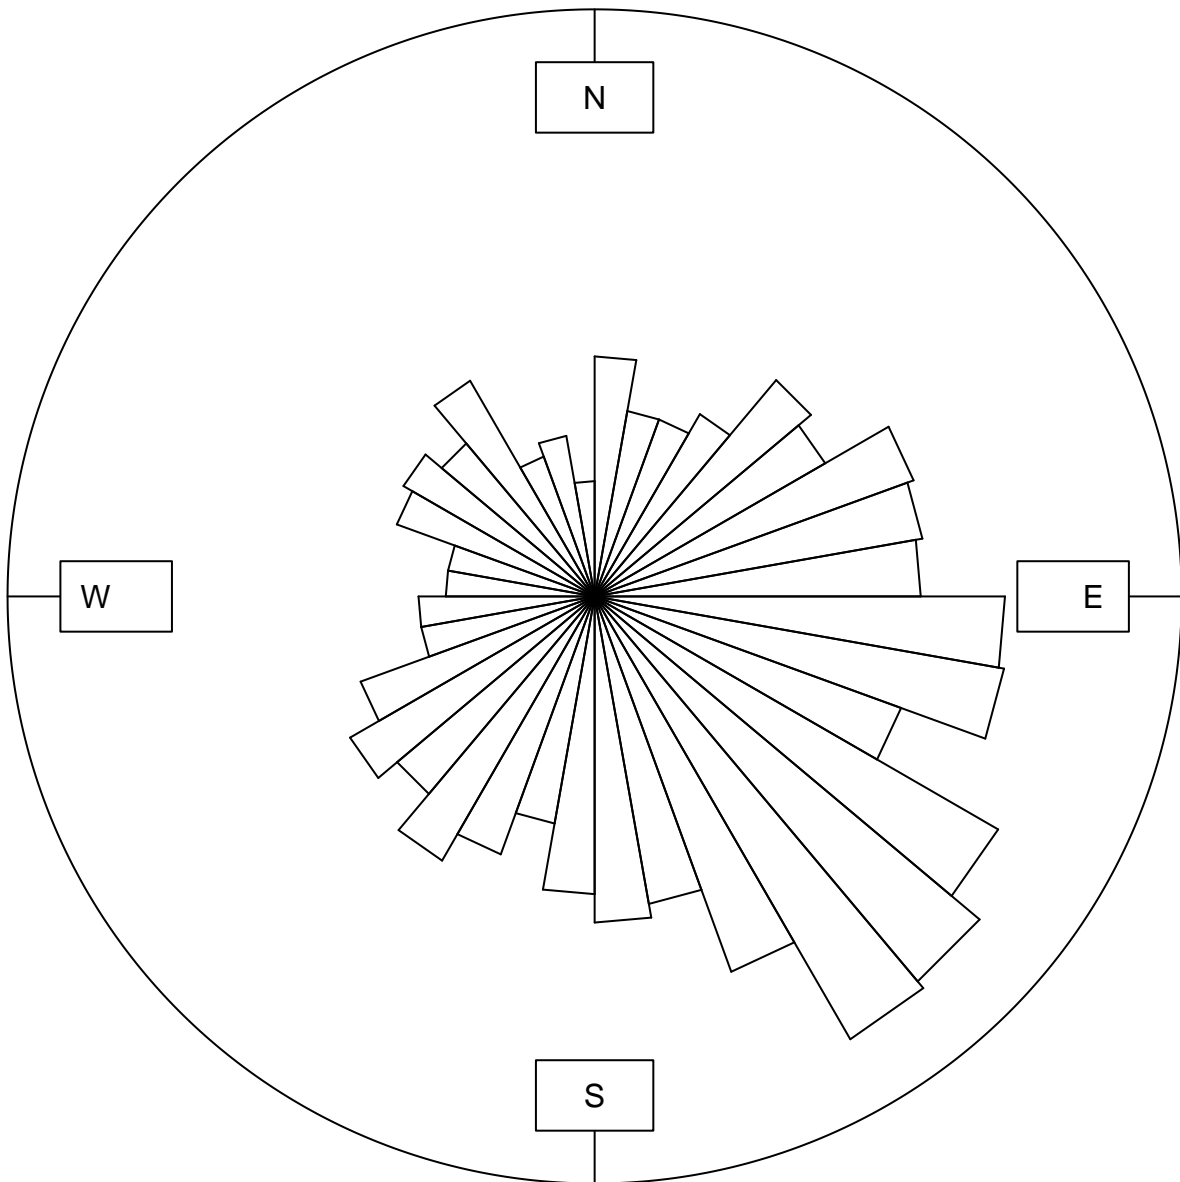

# bootstrap 122

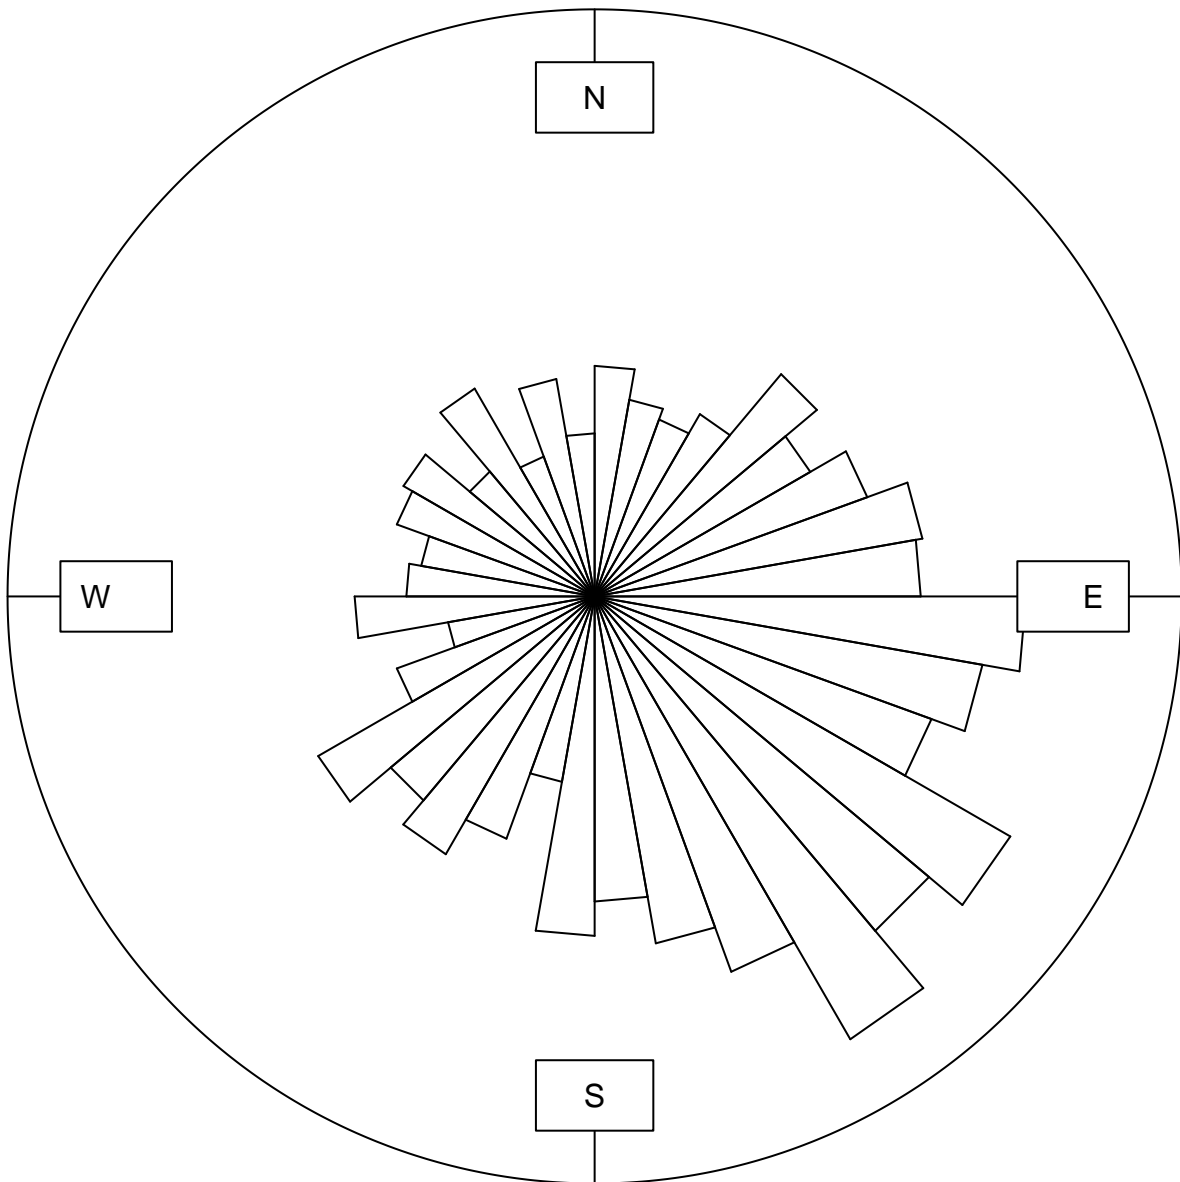

# bootstrap 123

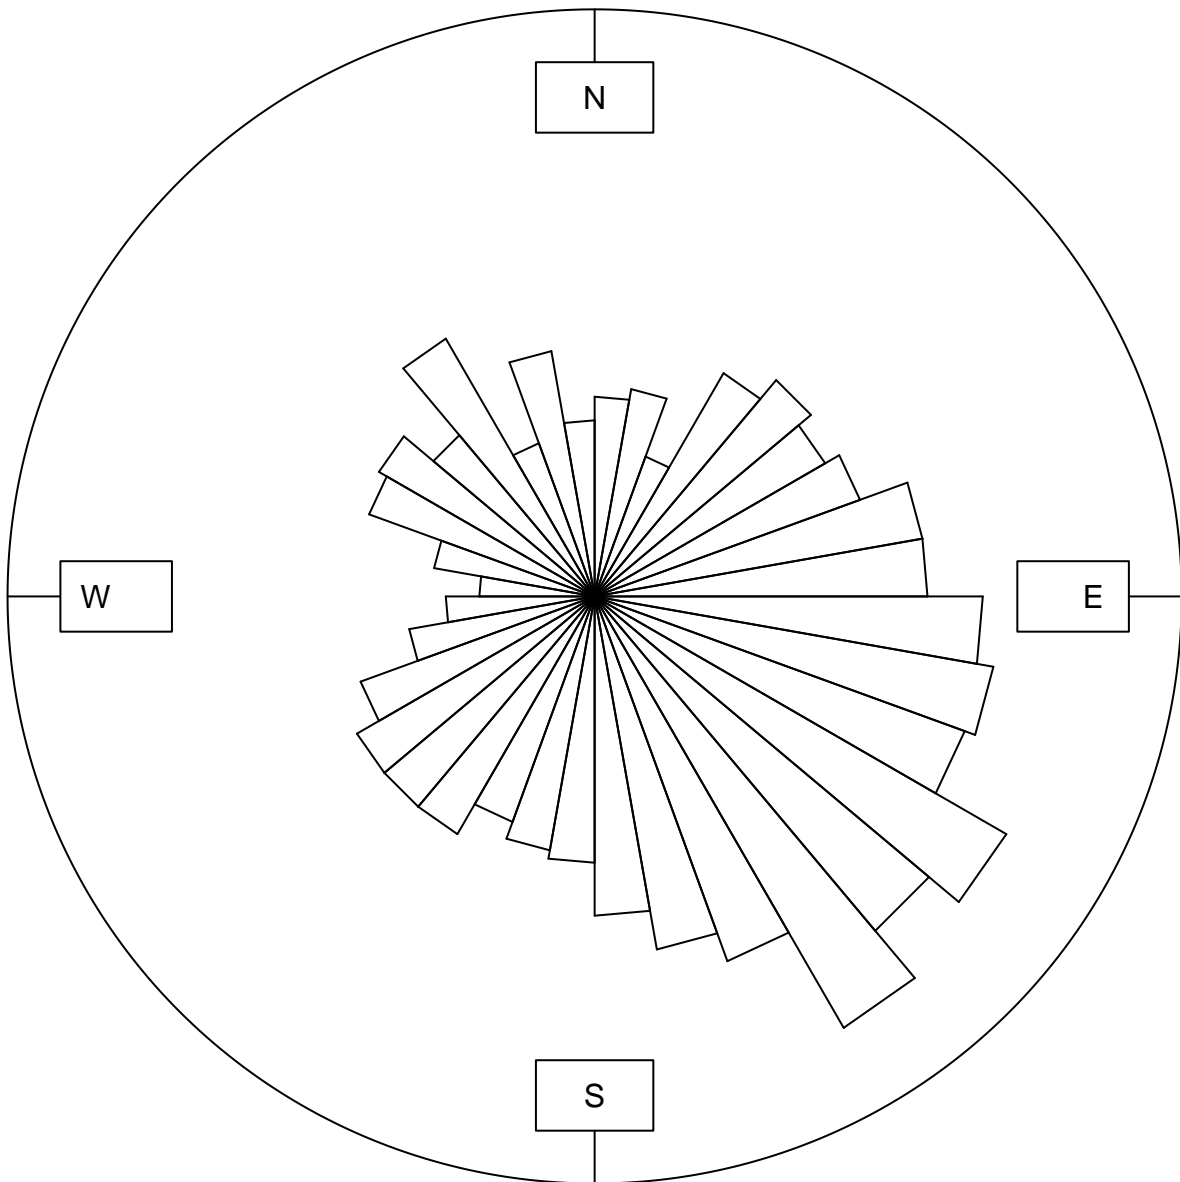

# bootstrap 124

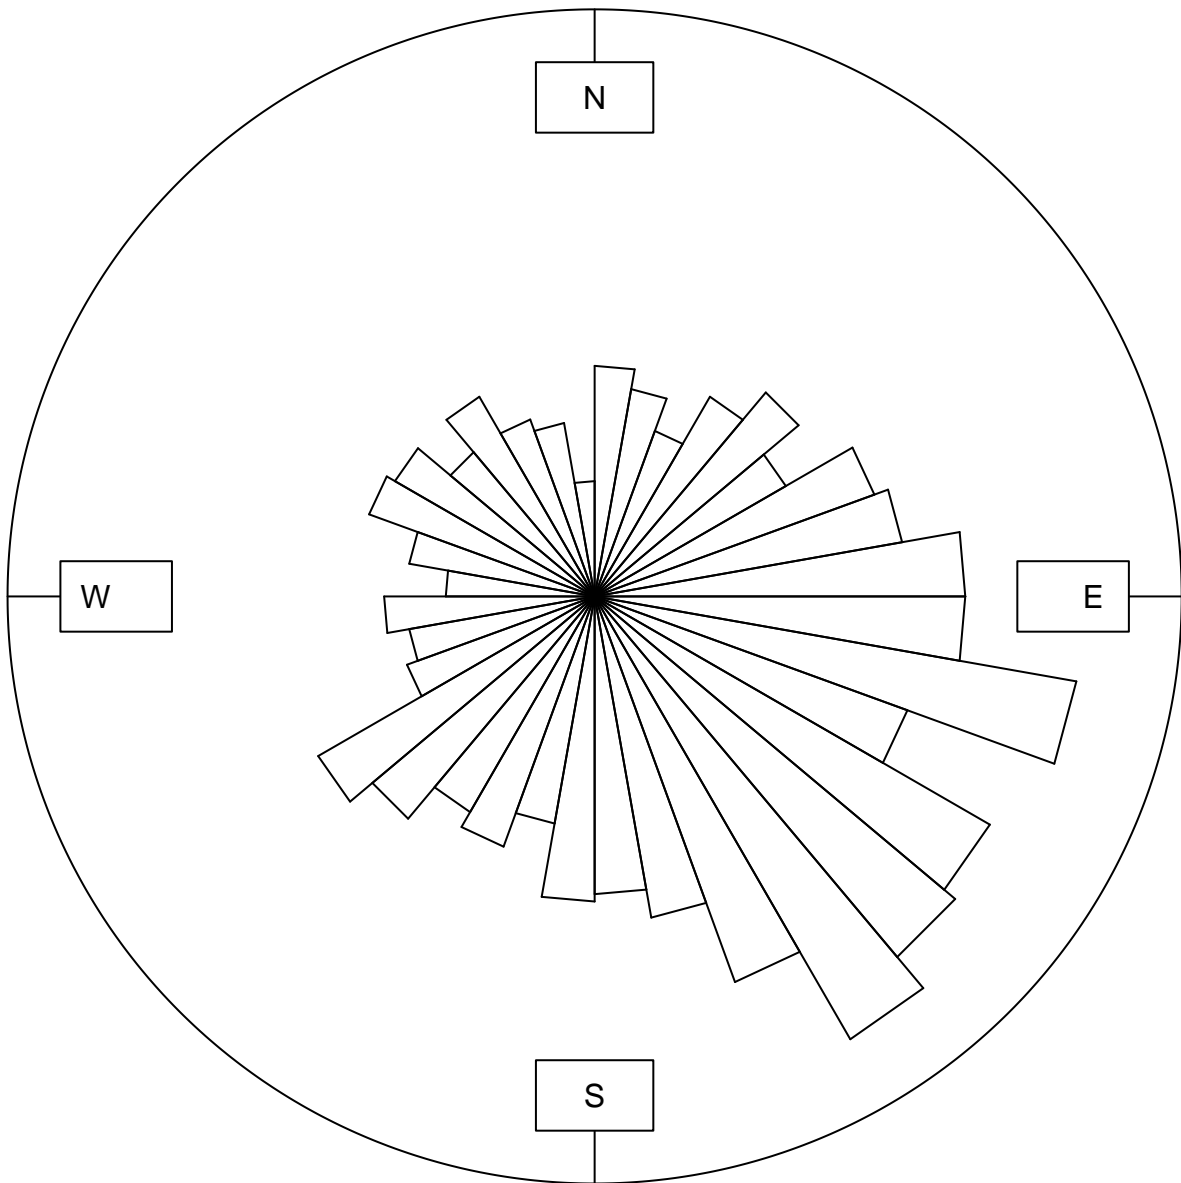

# bootstrap 125

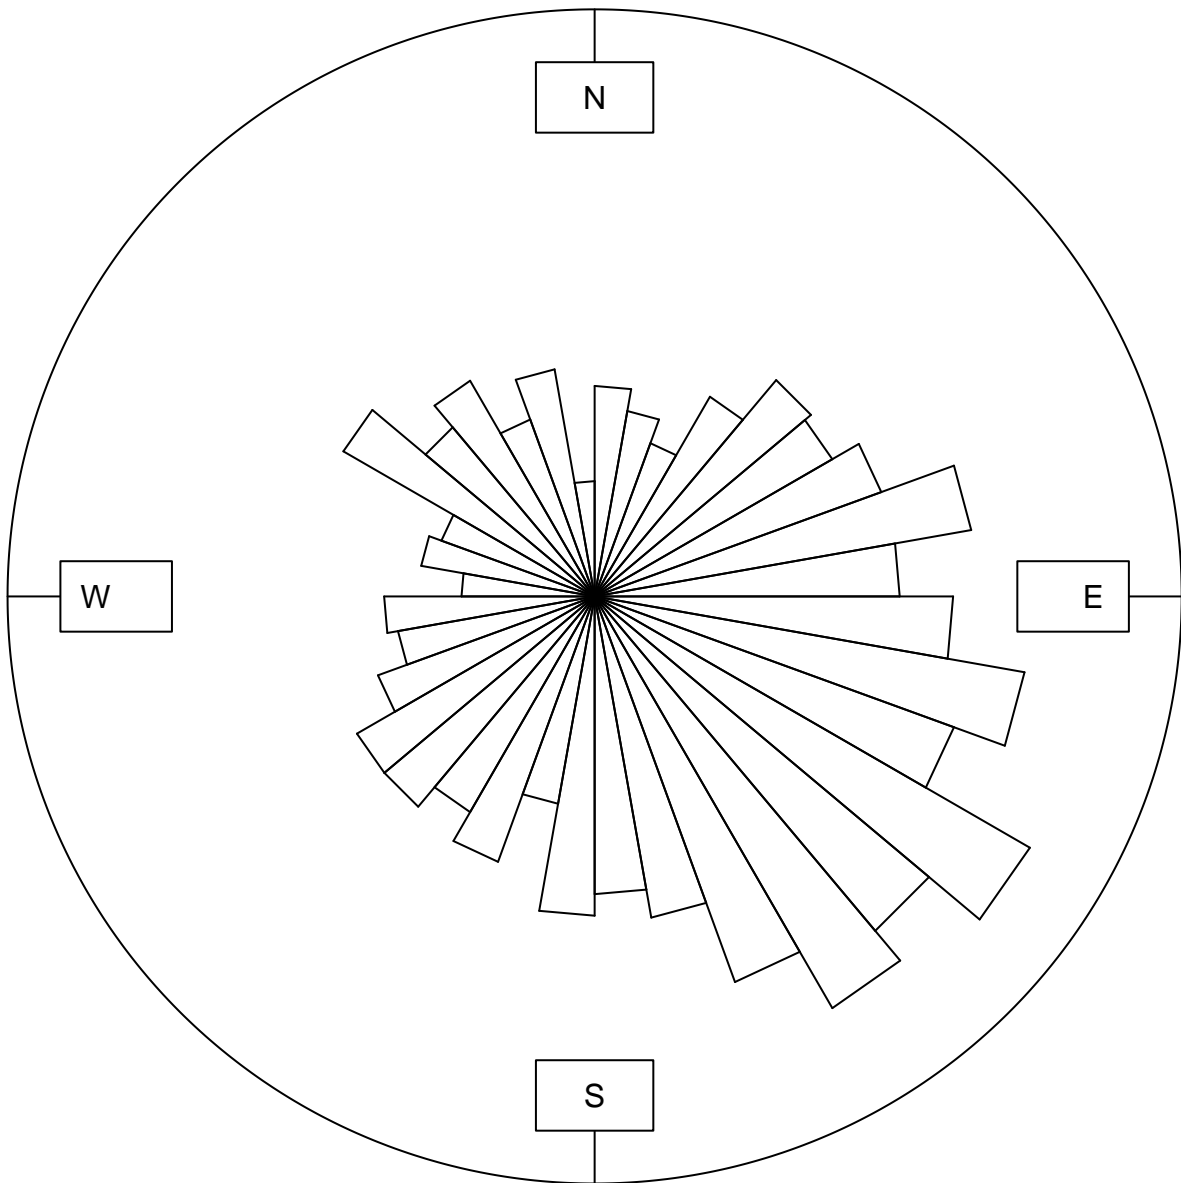

# bootstrap 126

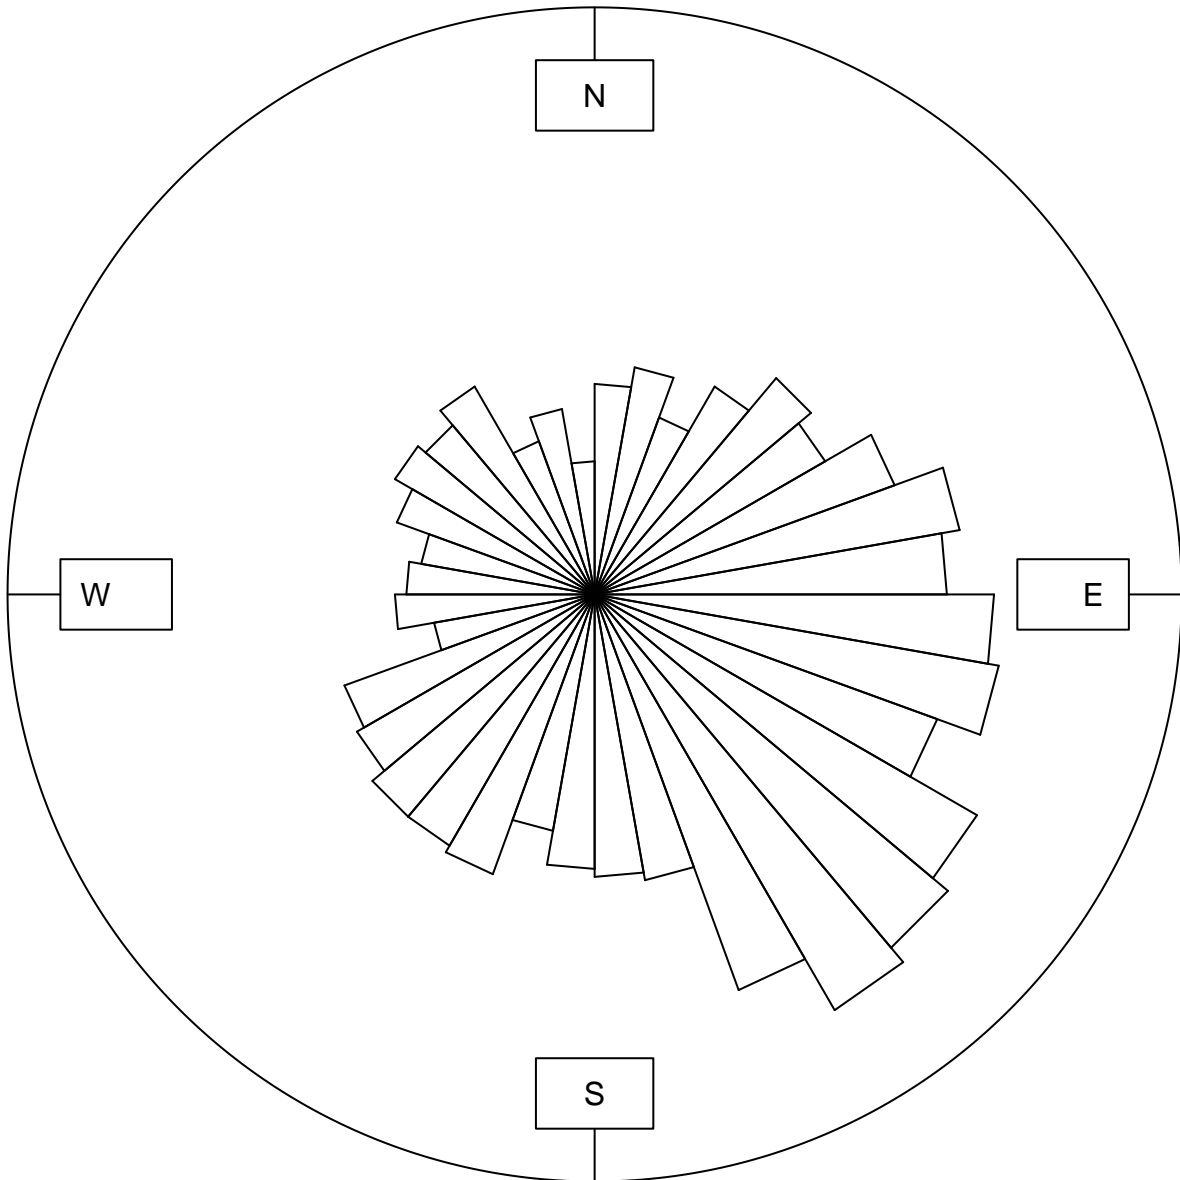

# bootstrap 127

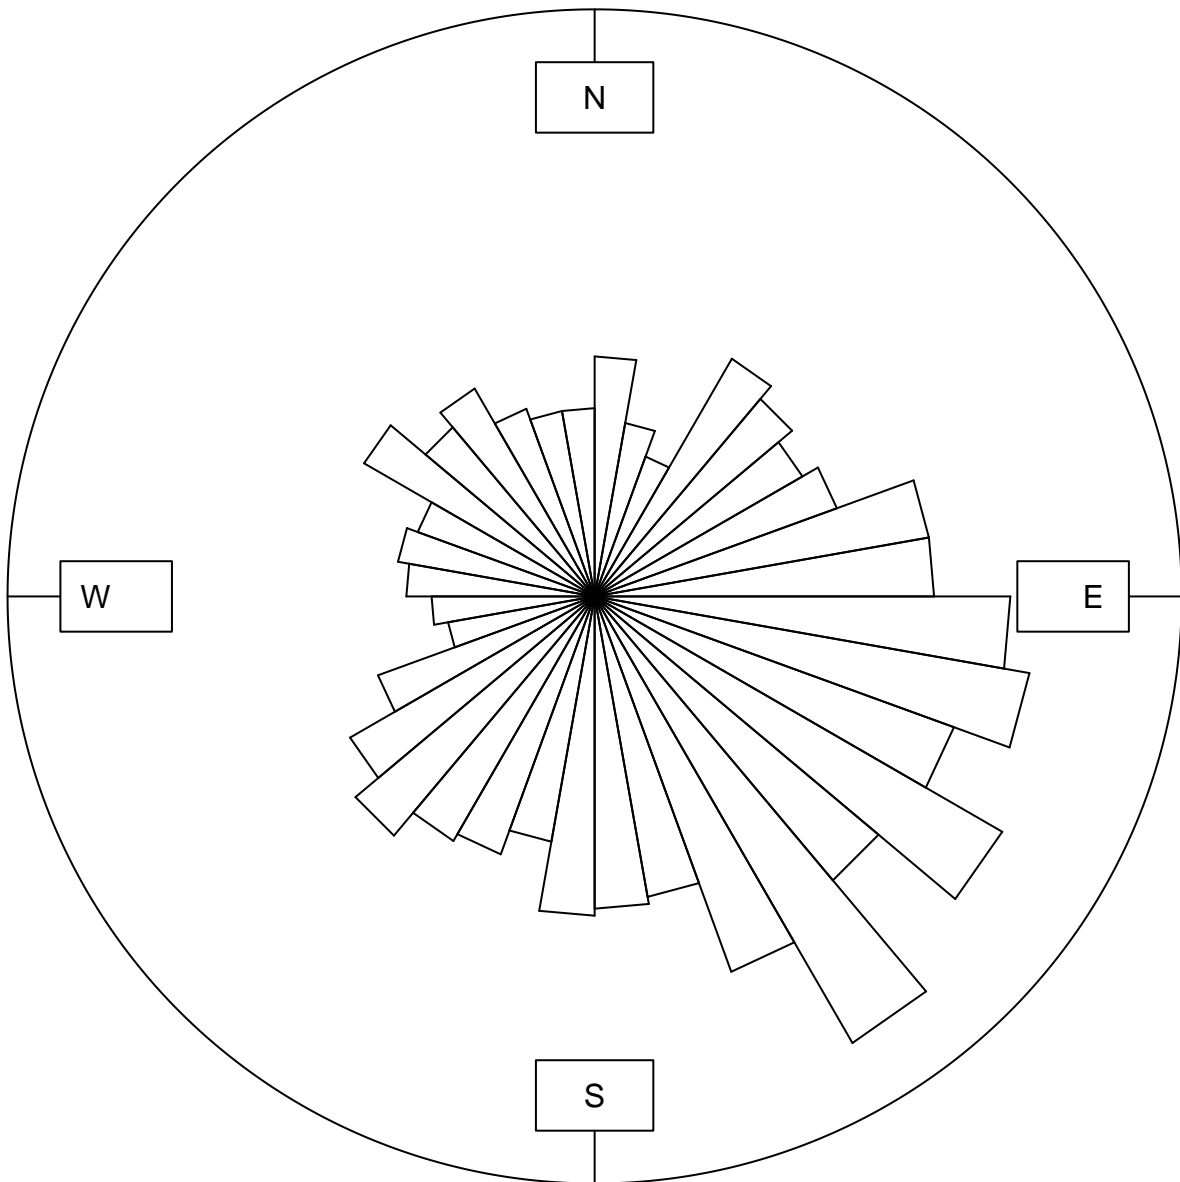

# bootstrap 128

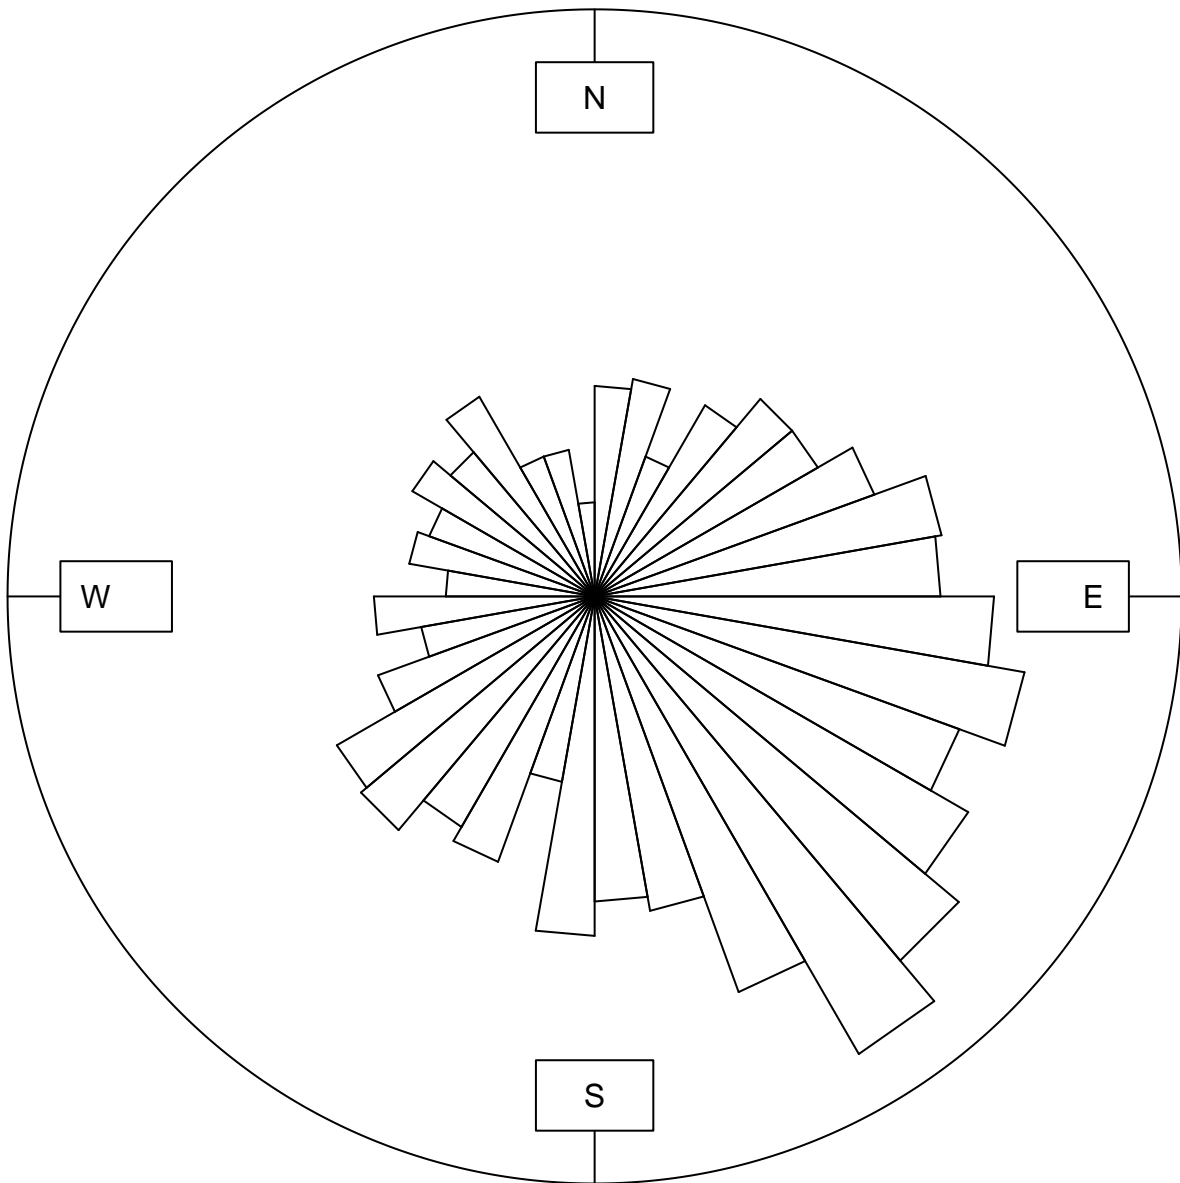



# bootstrap 129

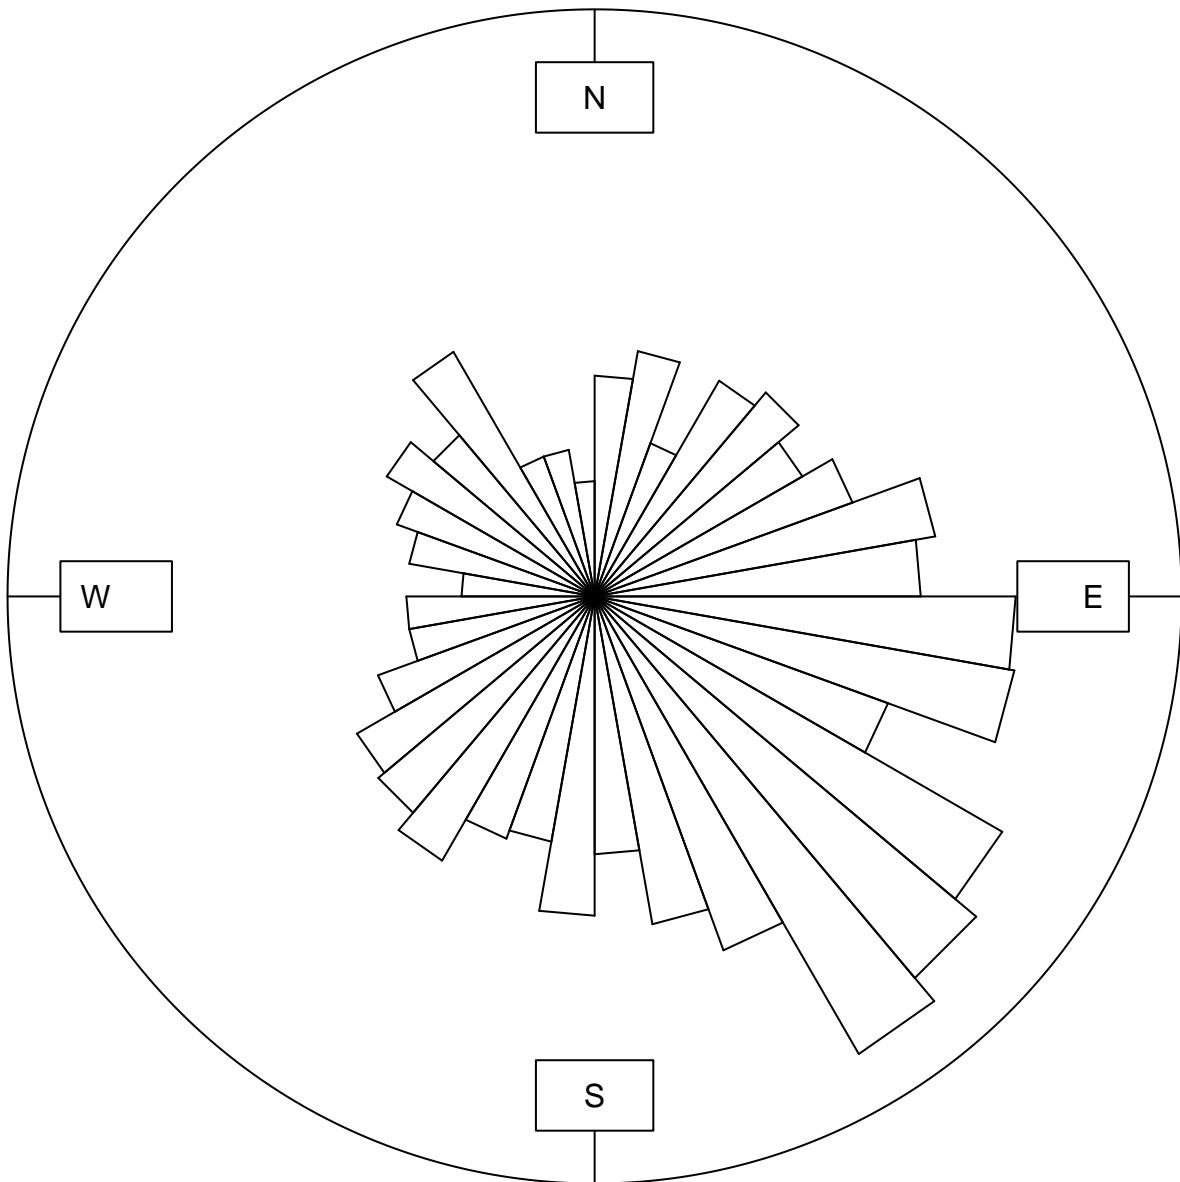

# bootstrap 130

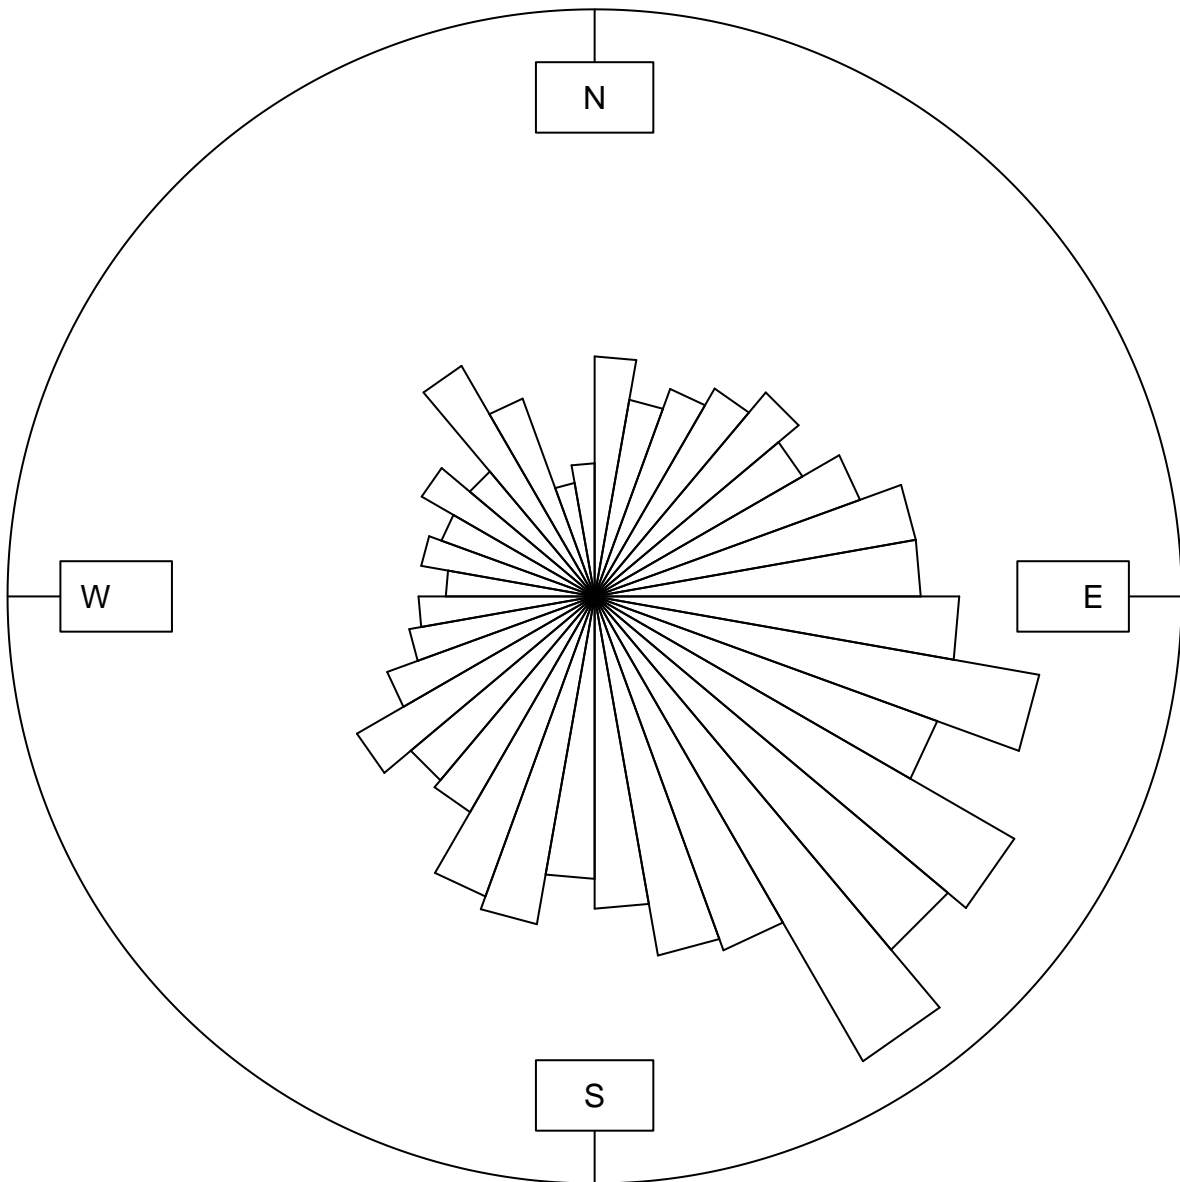

# bootstrap 131

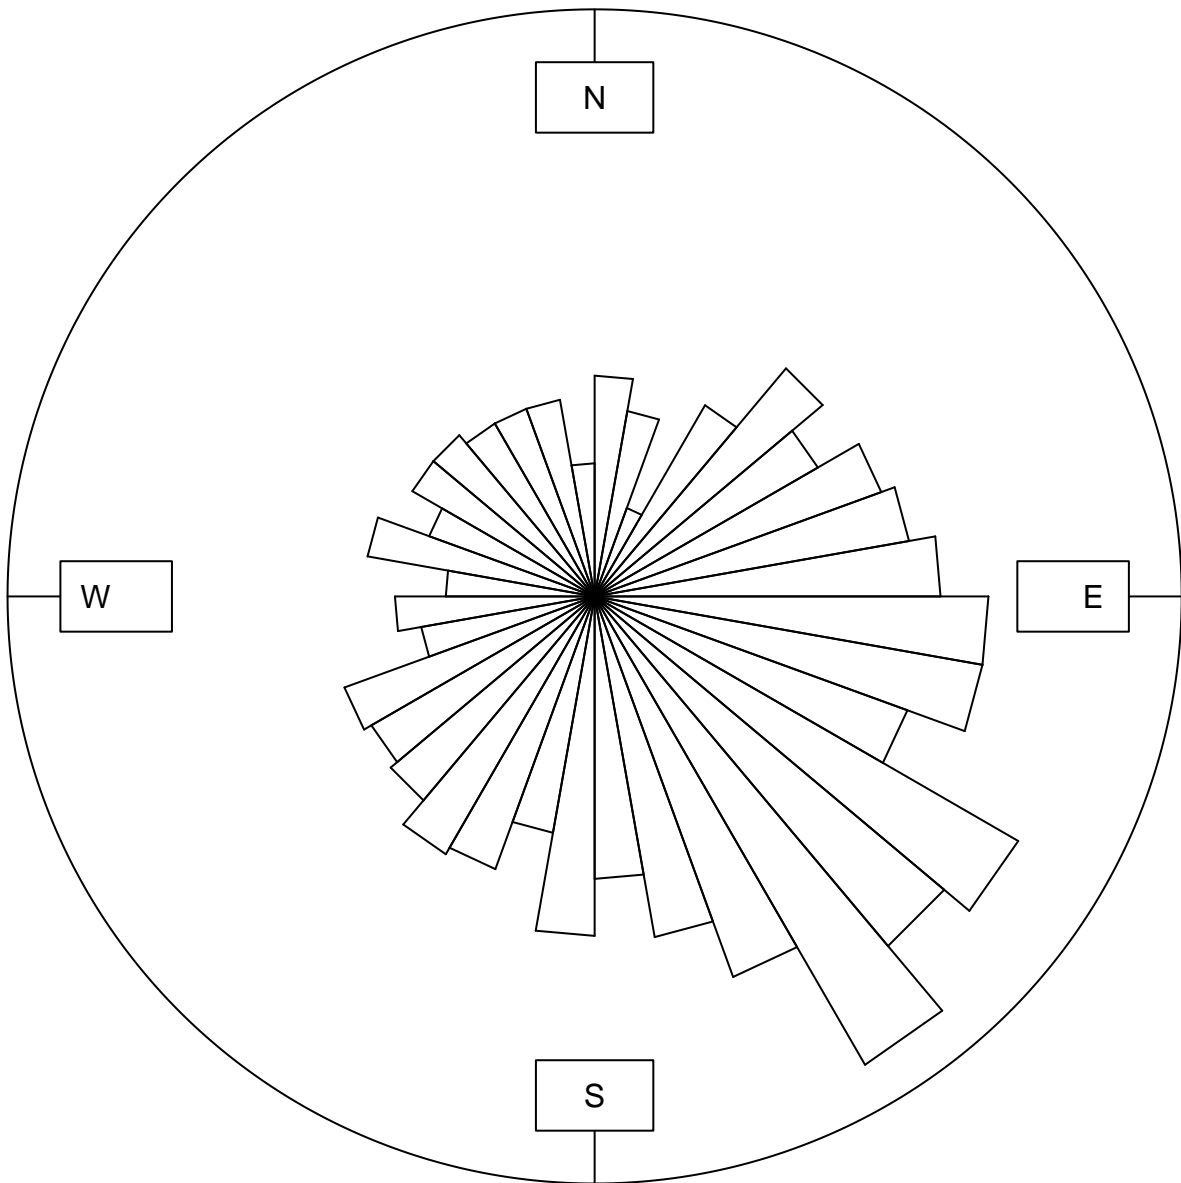

# bootstrap 132

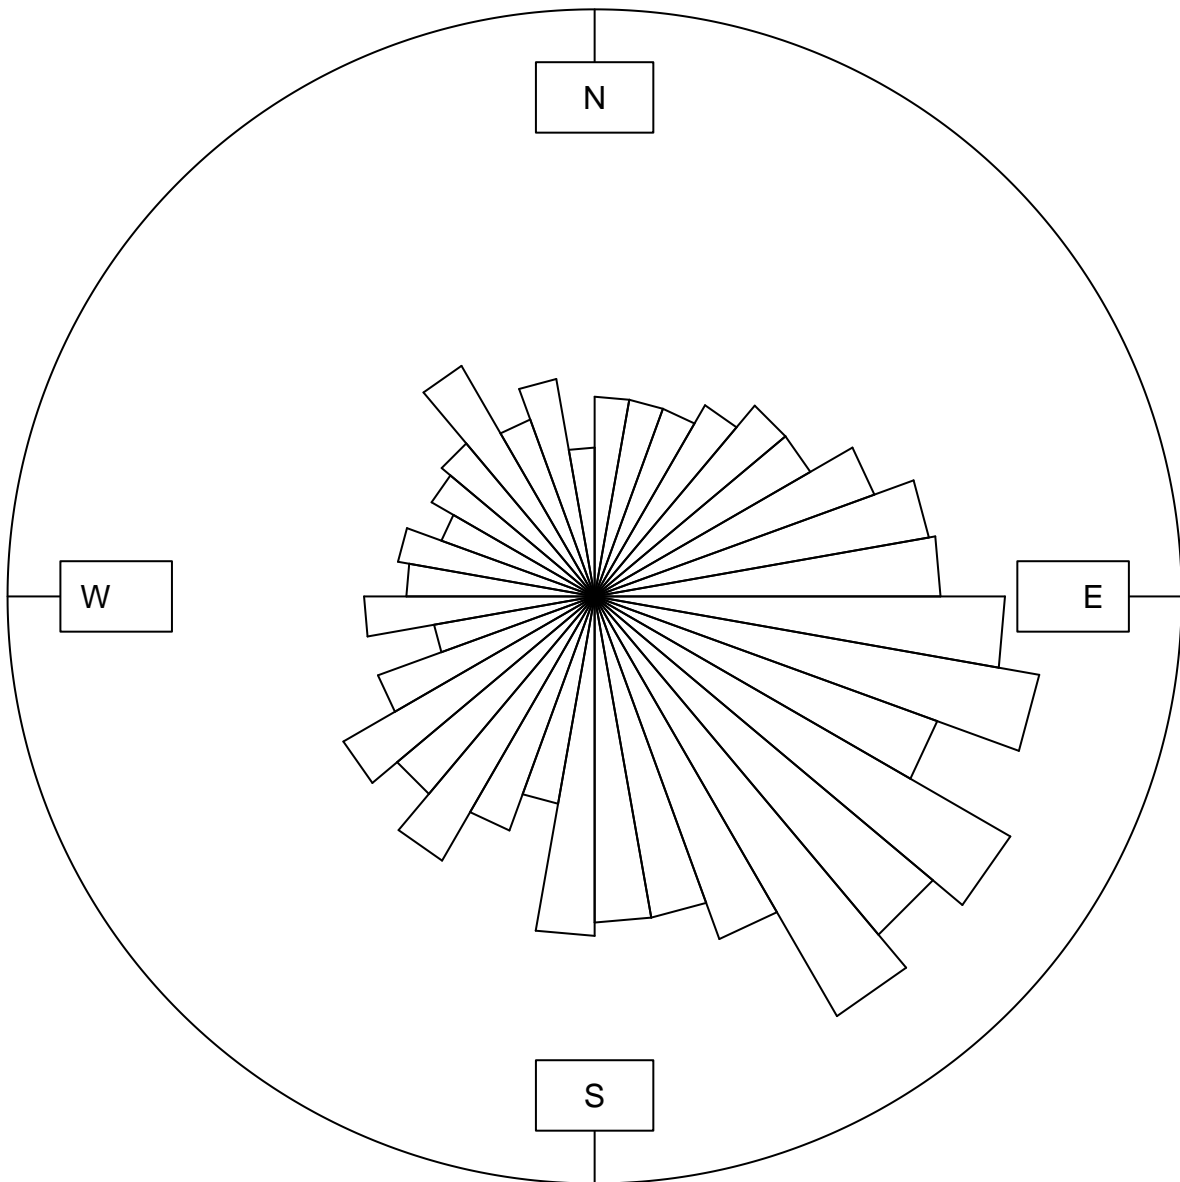

# bootstrap 133

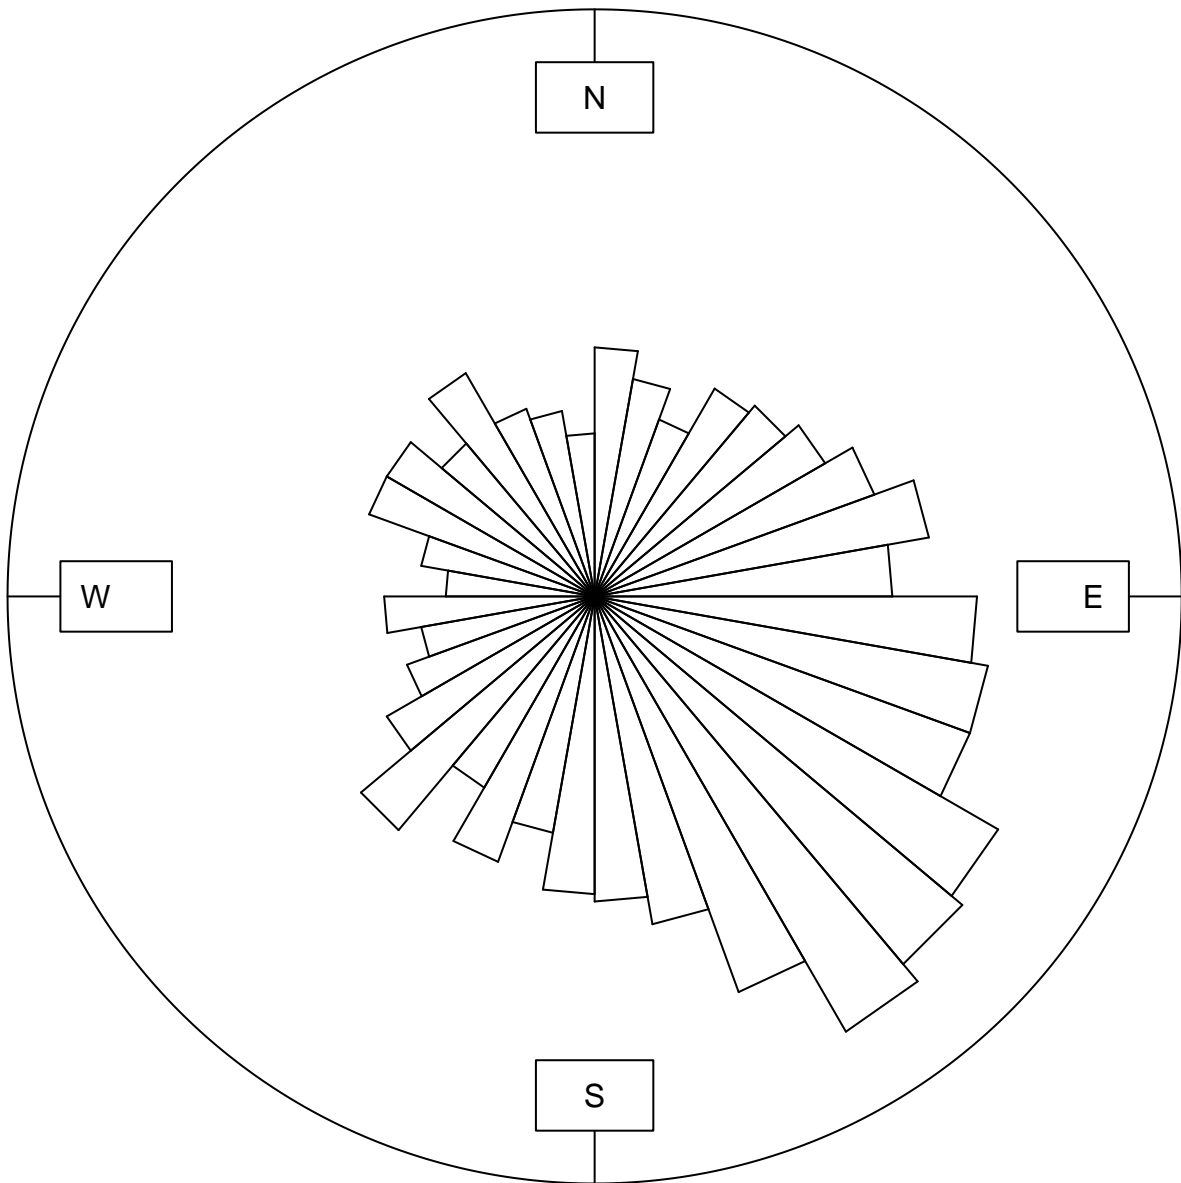

# bootstrap 134

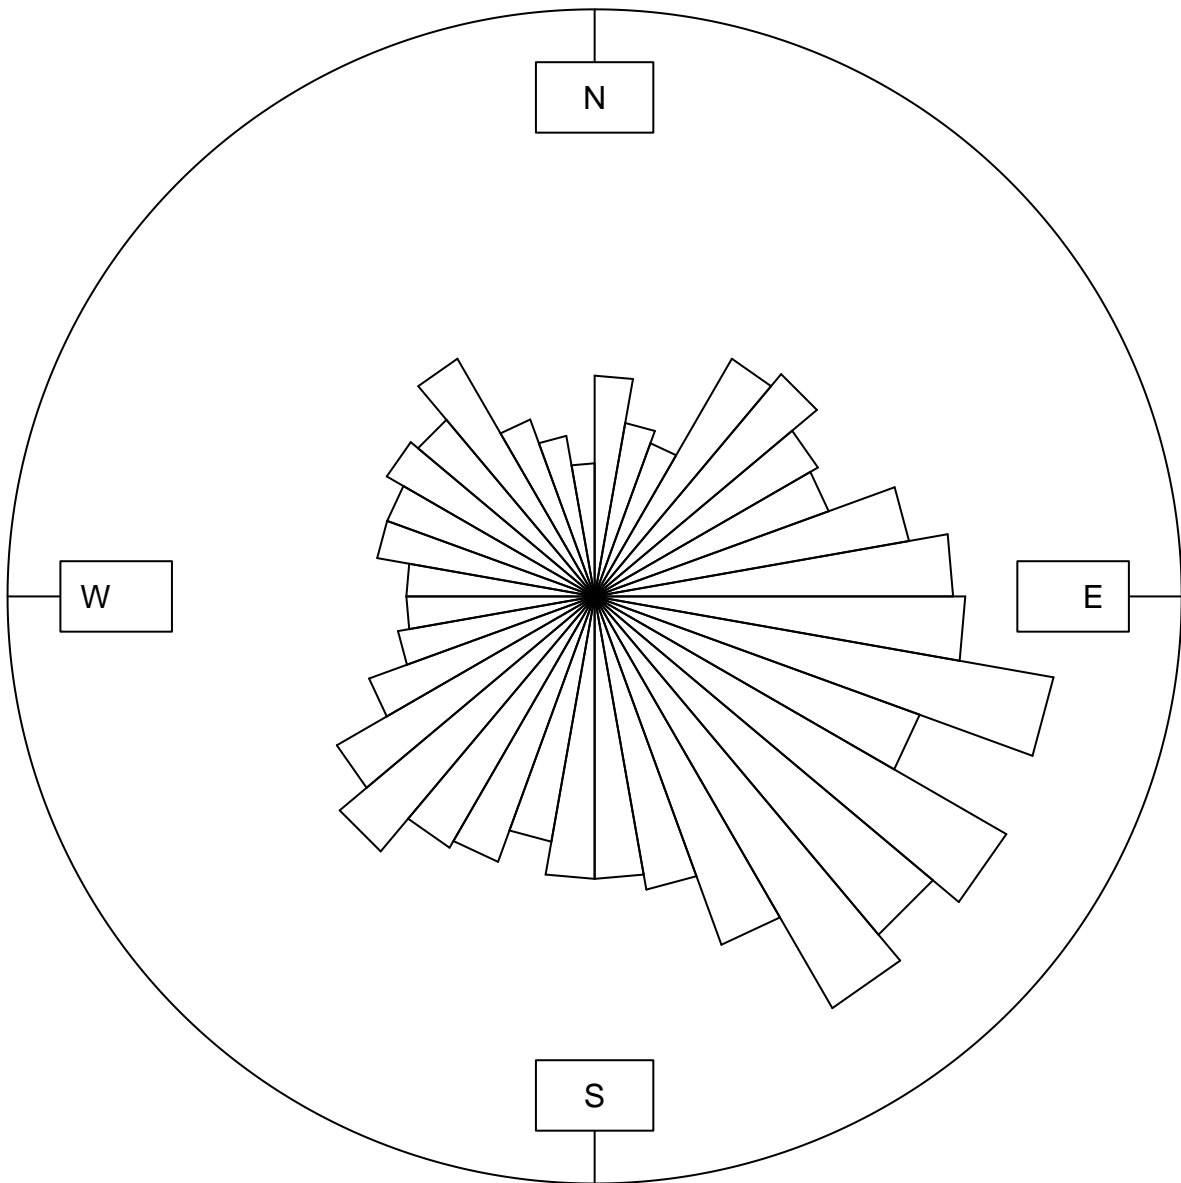

# bootstrap 135

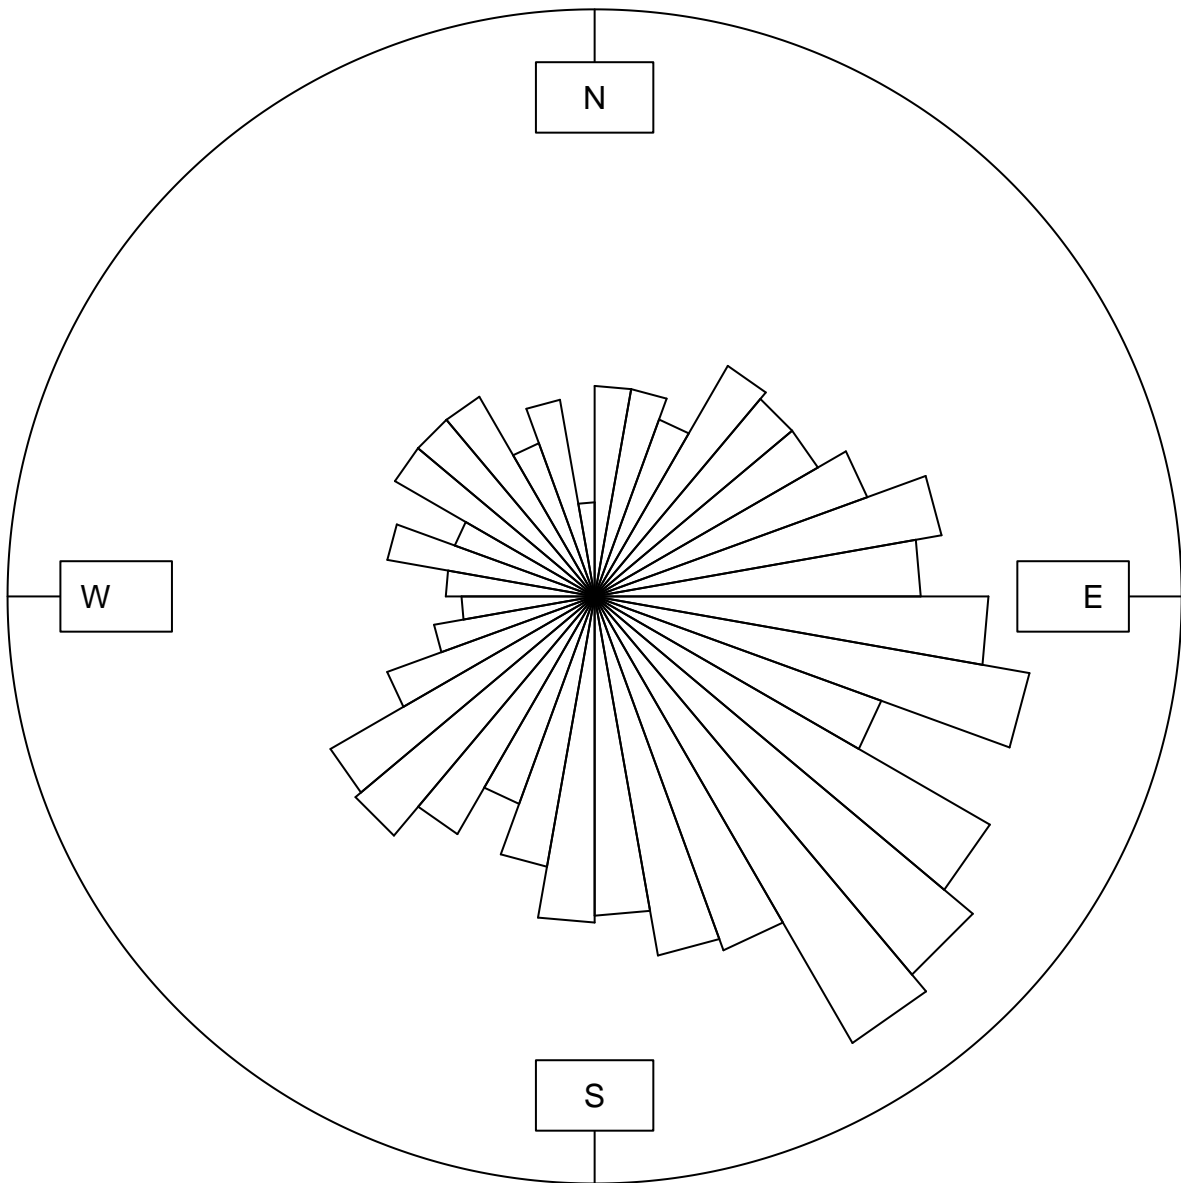

**bootstrap 136**

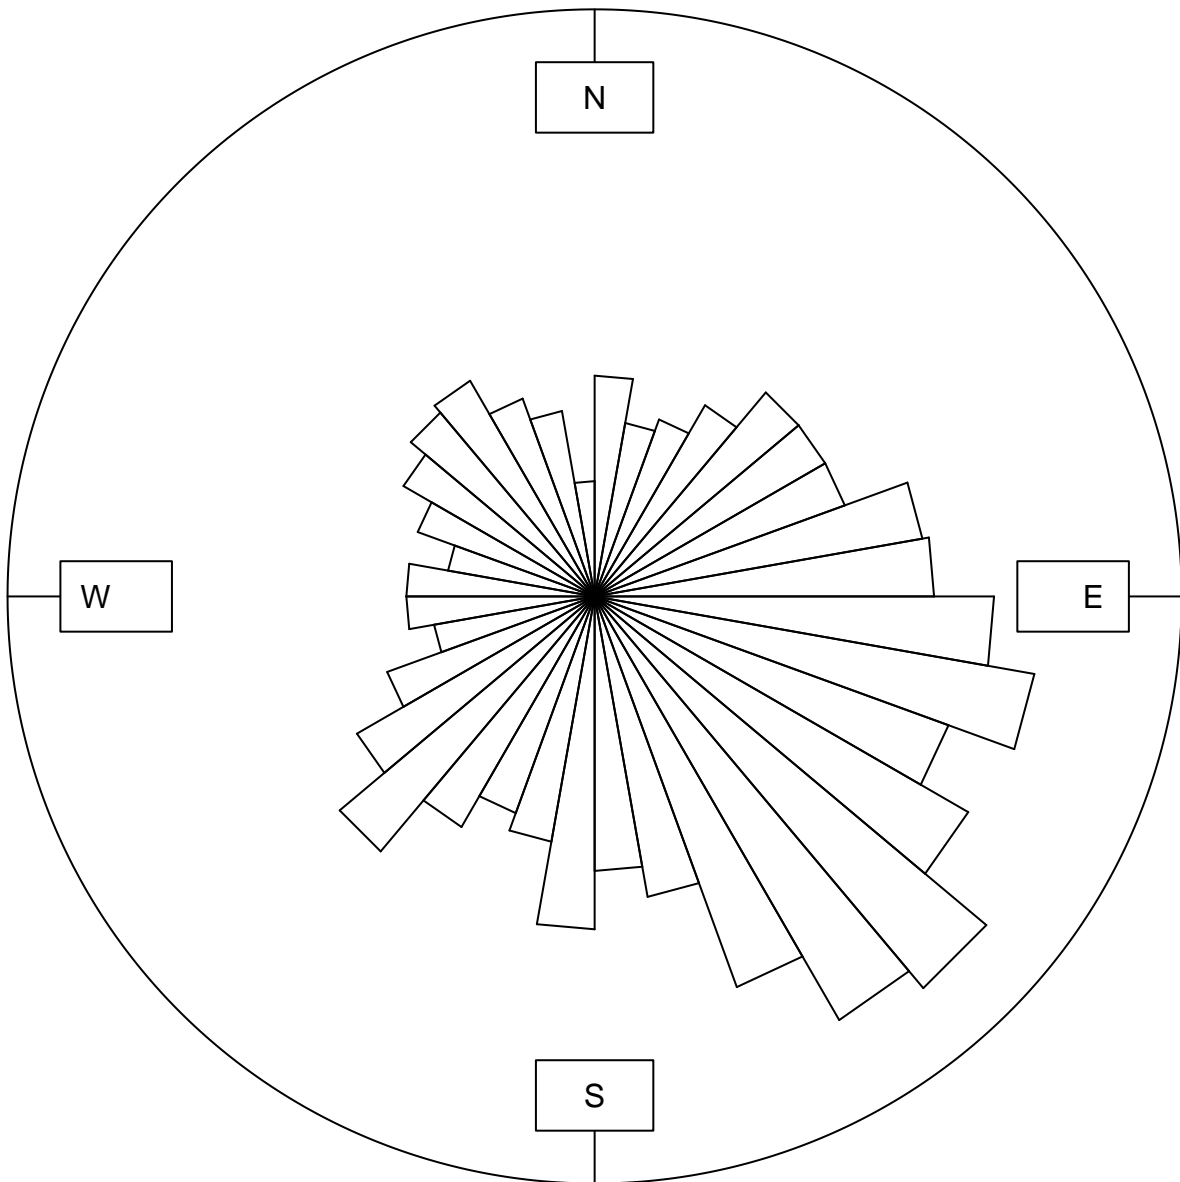



**bootstrap 137**

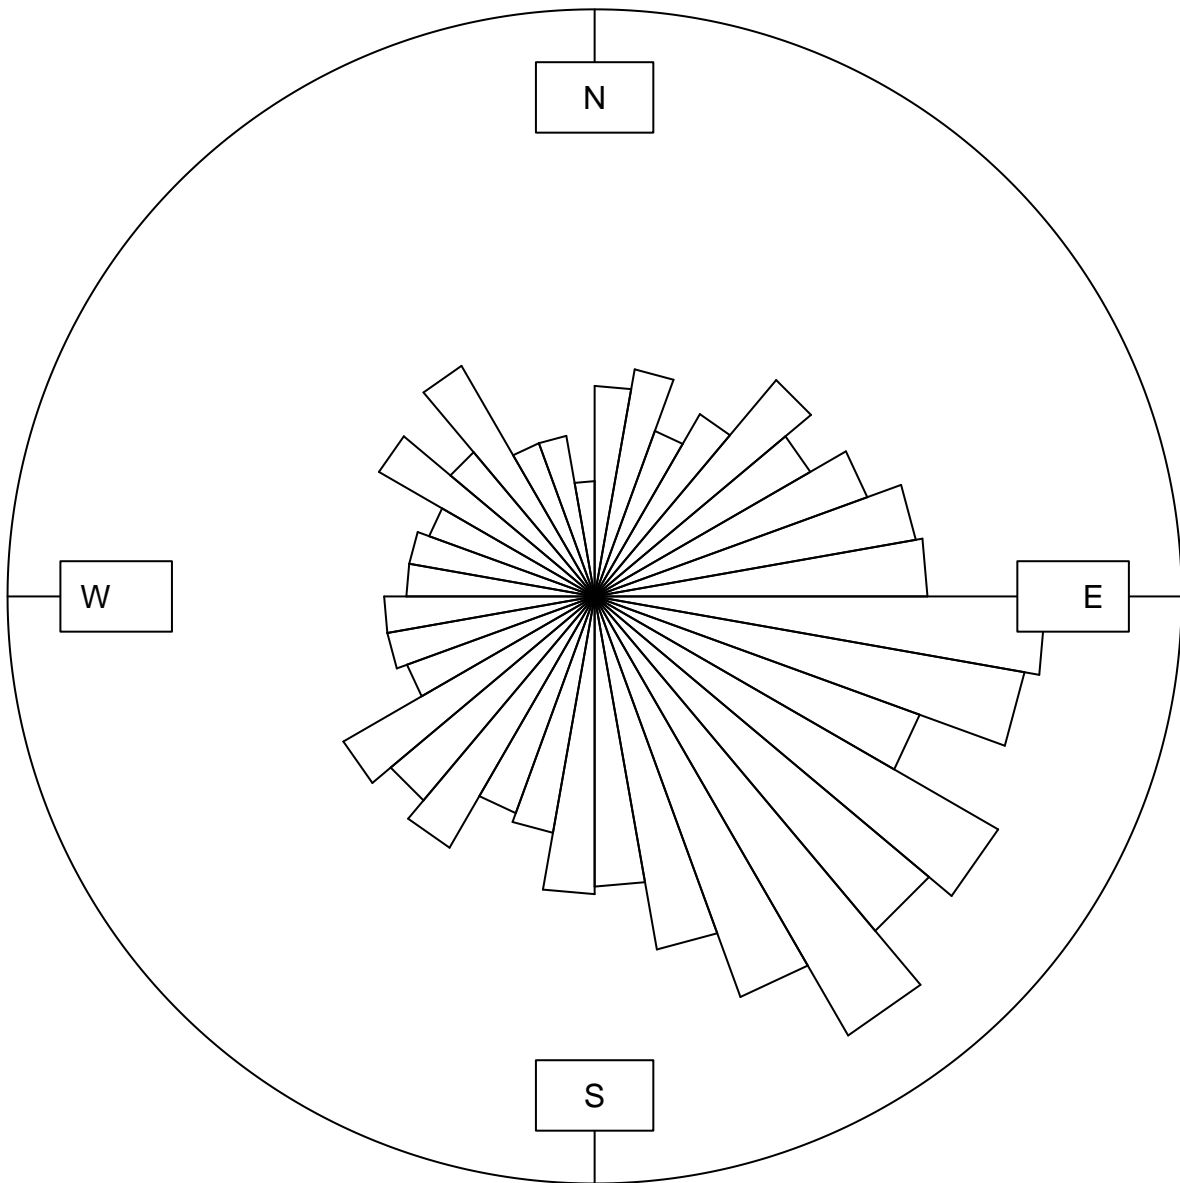

# bootstrap 138

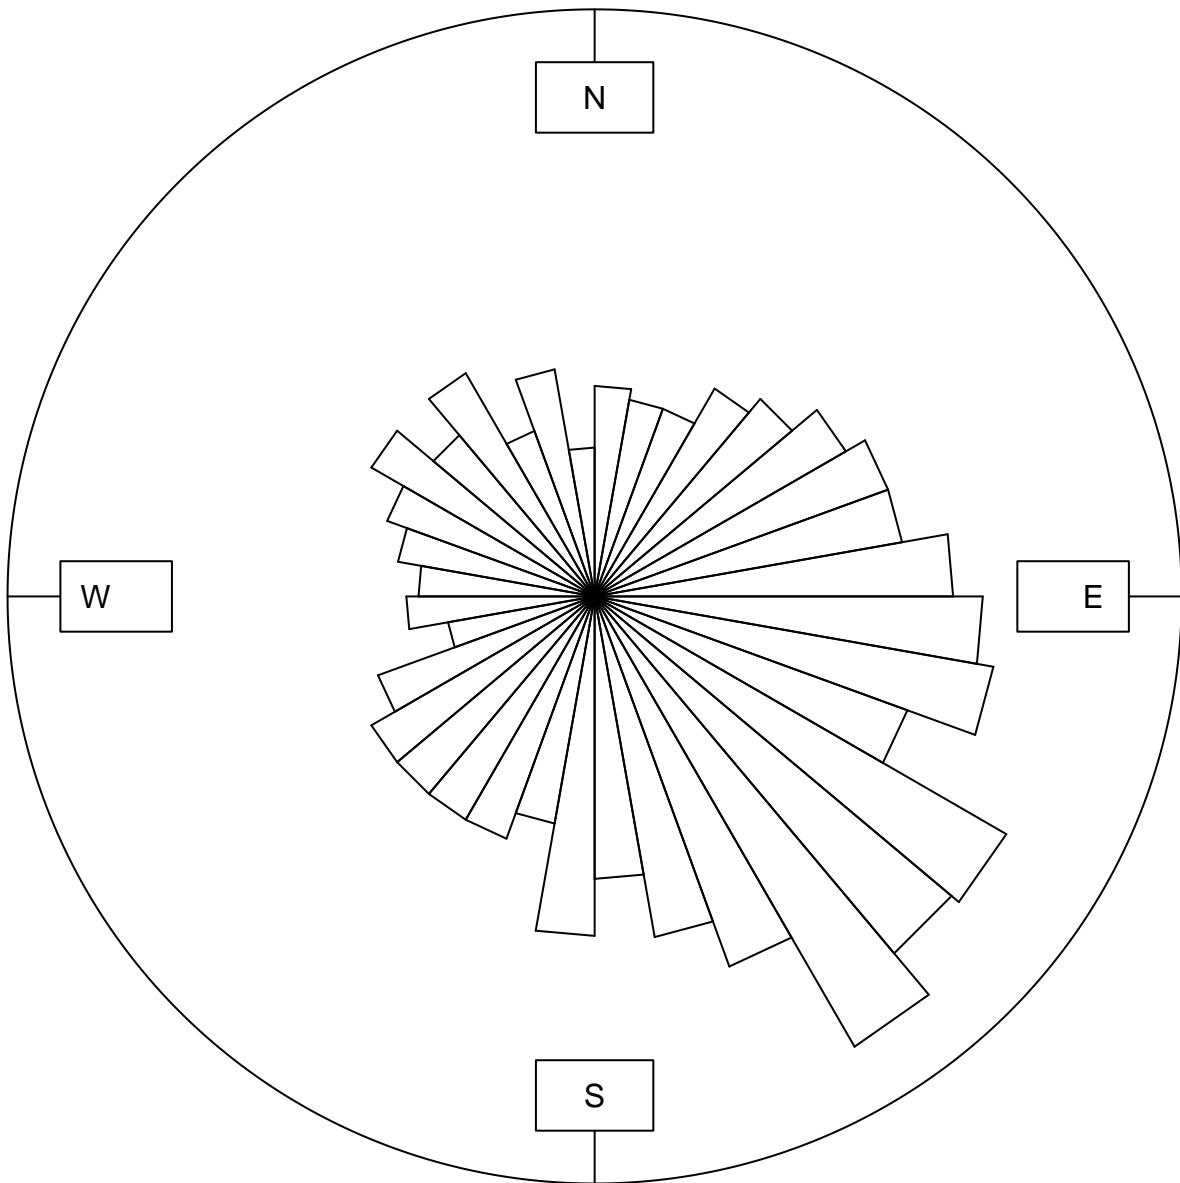

**bootstrap 139**

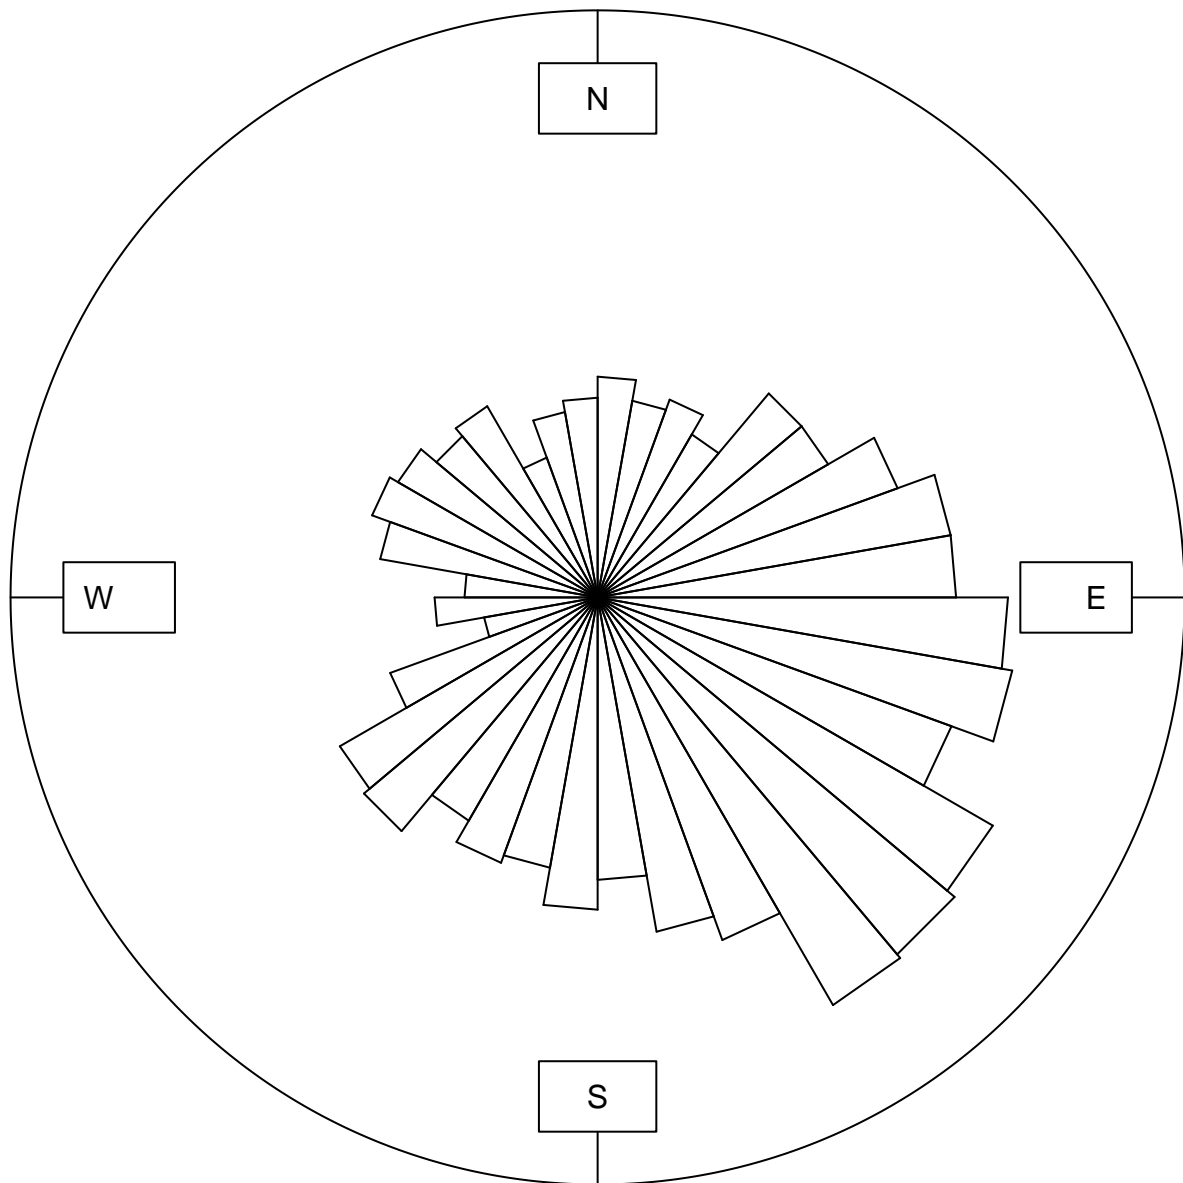

# bootstrap 140

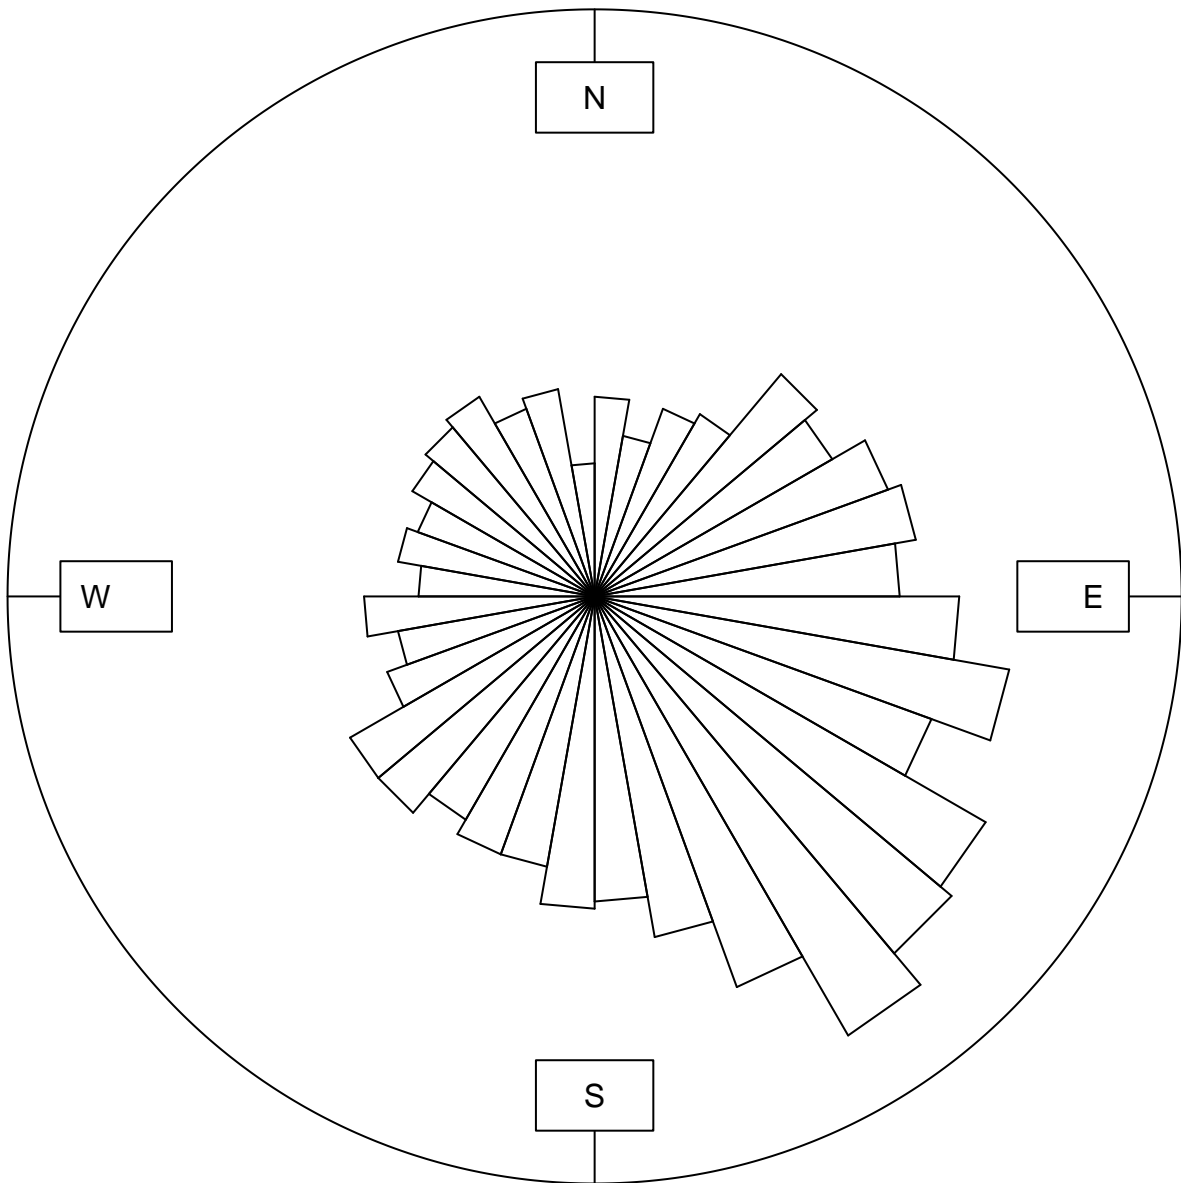

# bootstrap 141

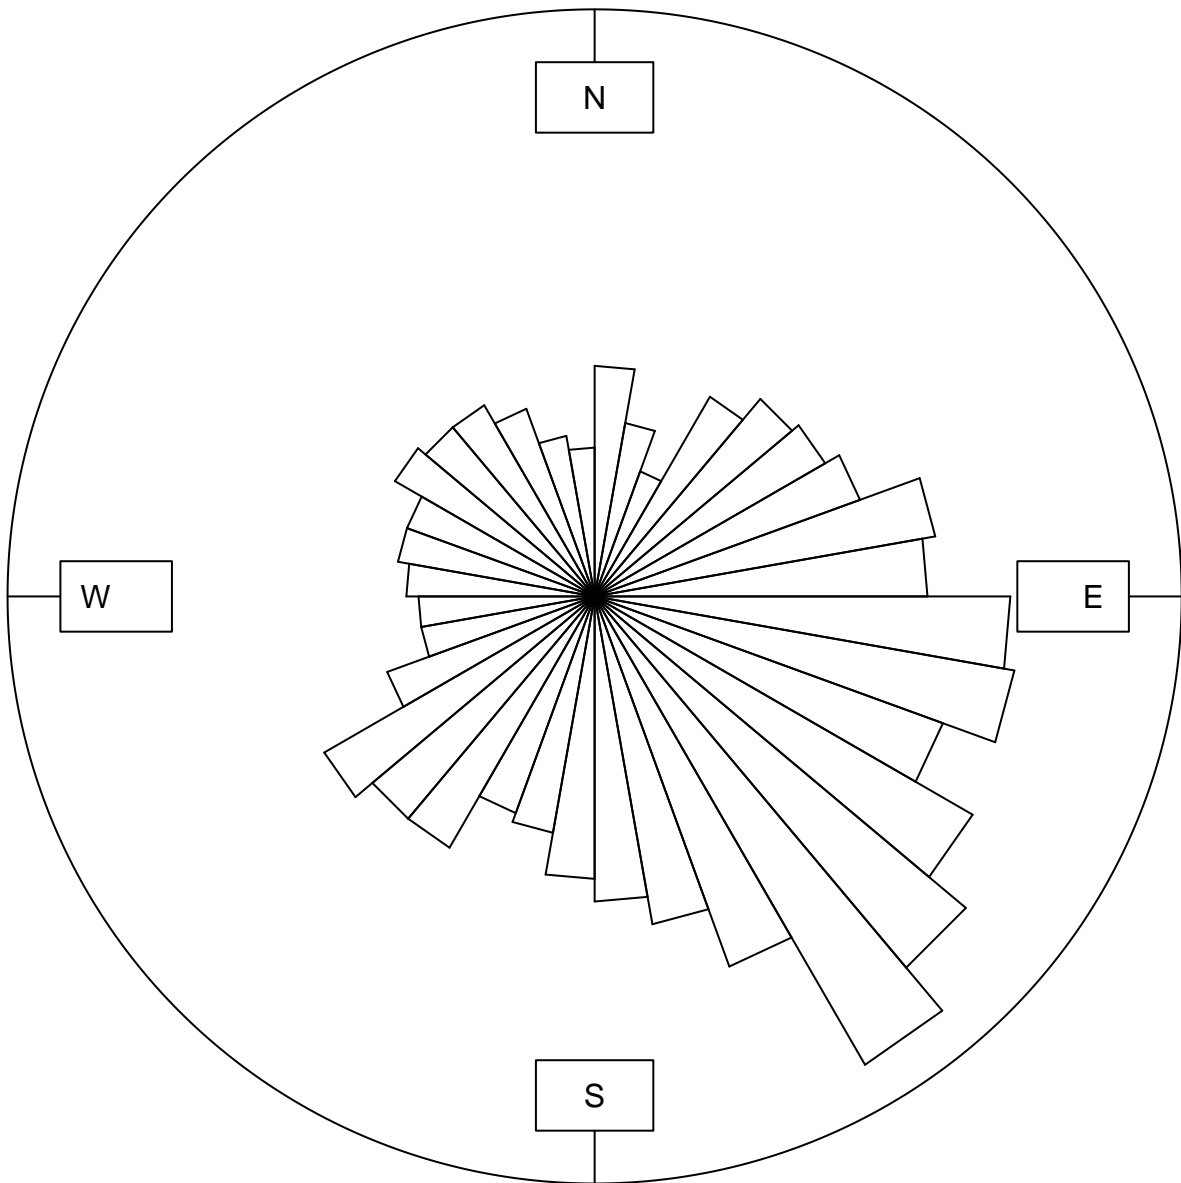

# bootstrap 142

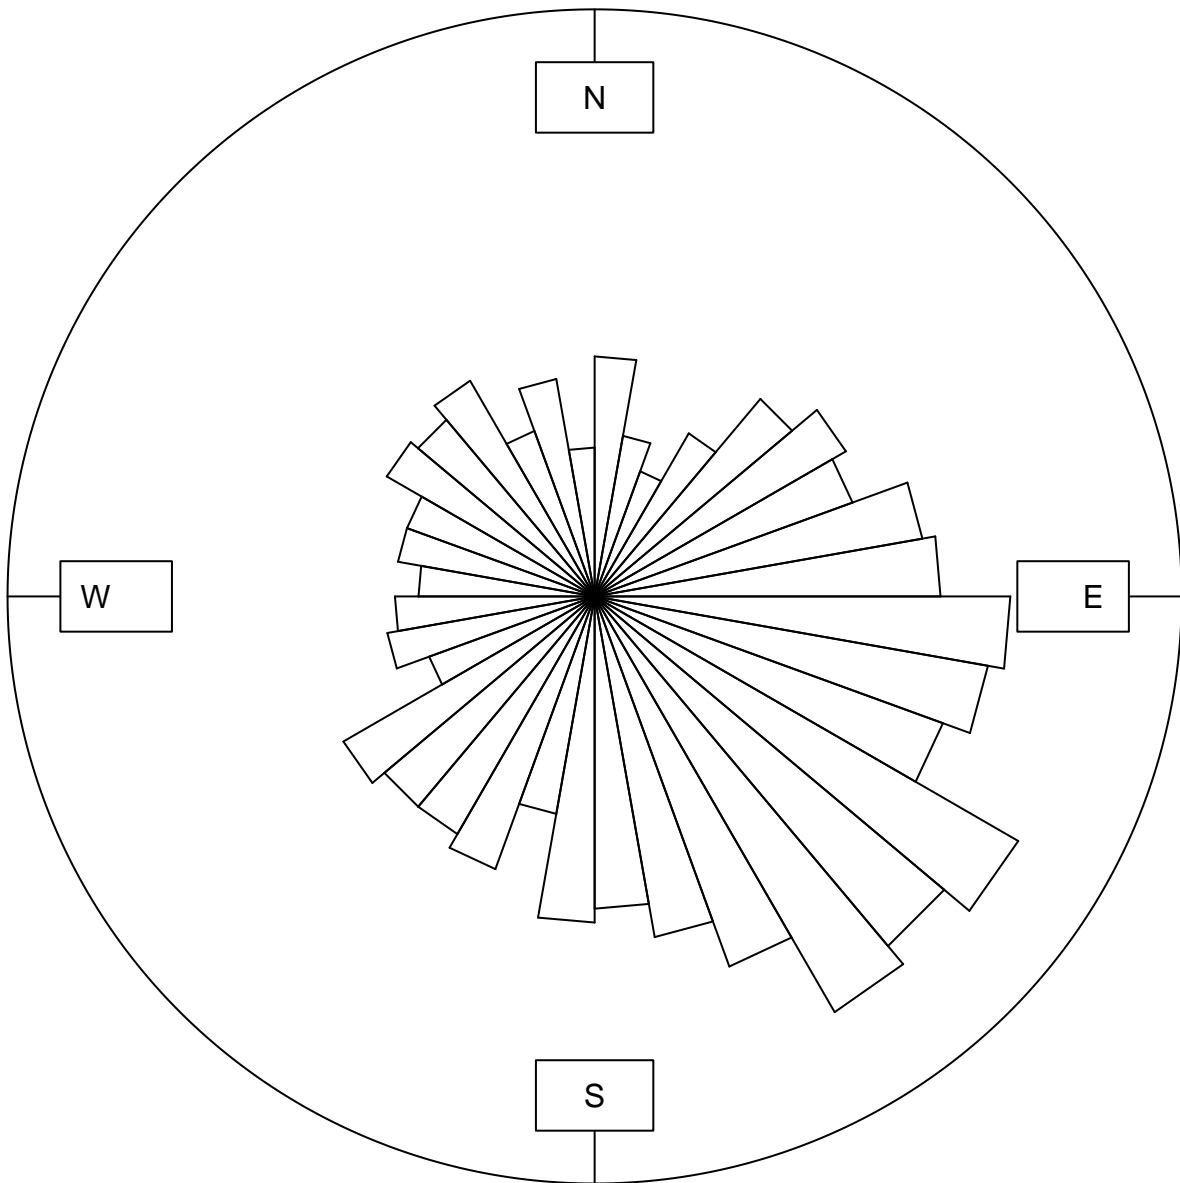

# bootstrap 143

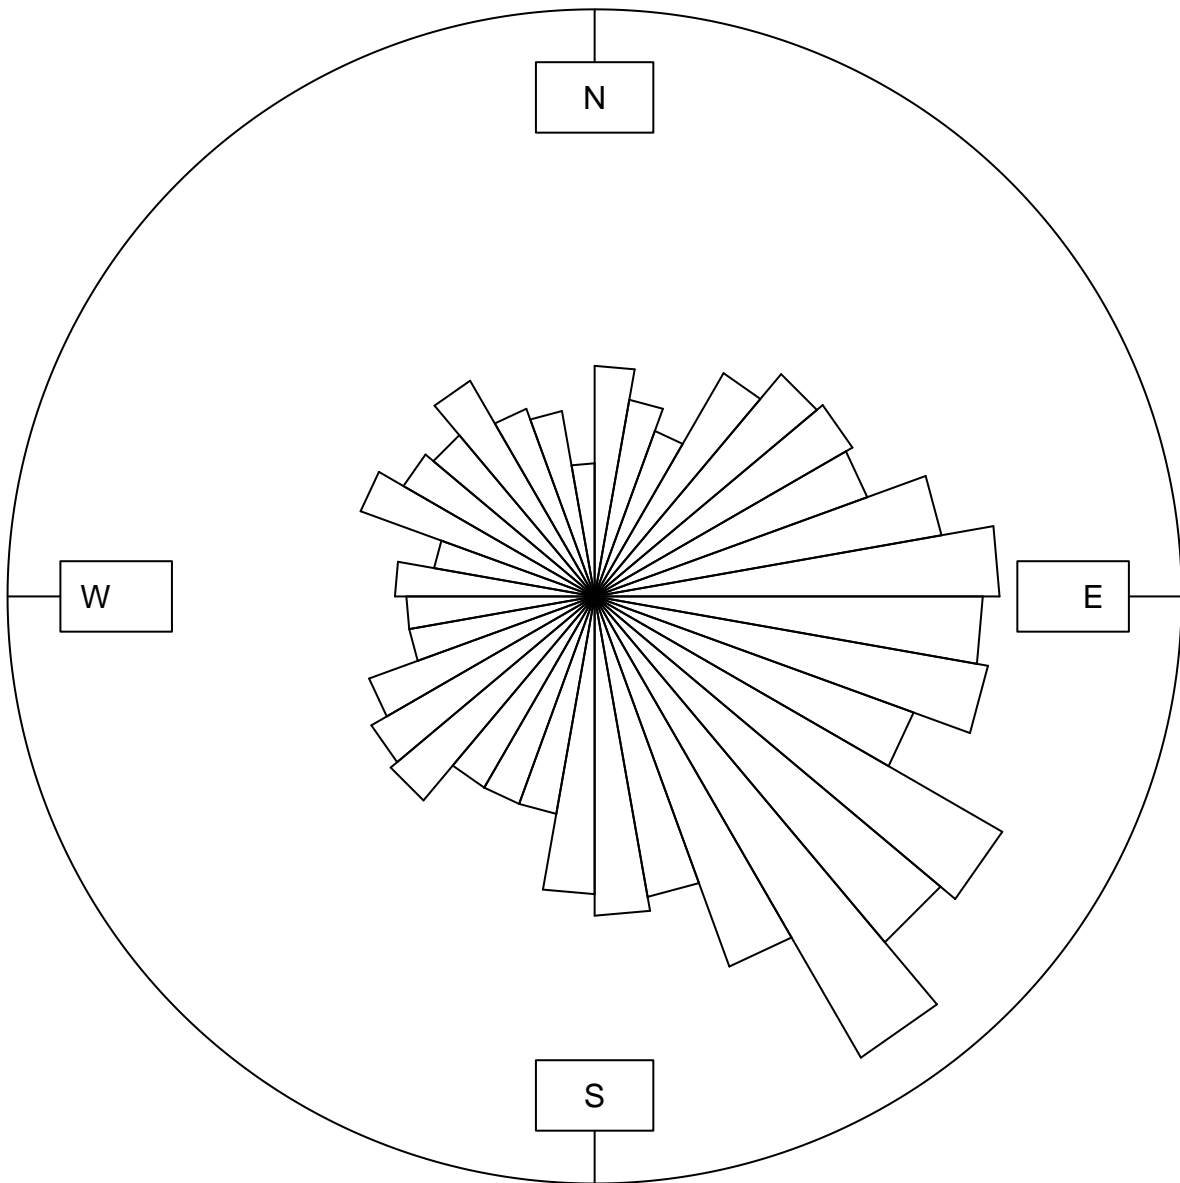

# bootstrap 144

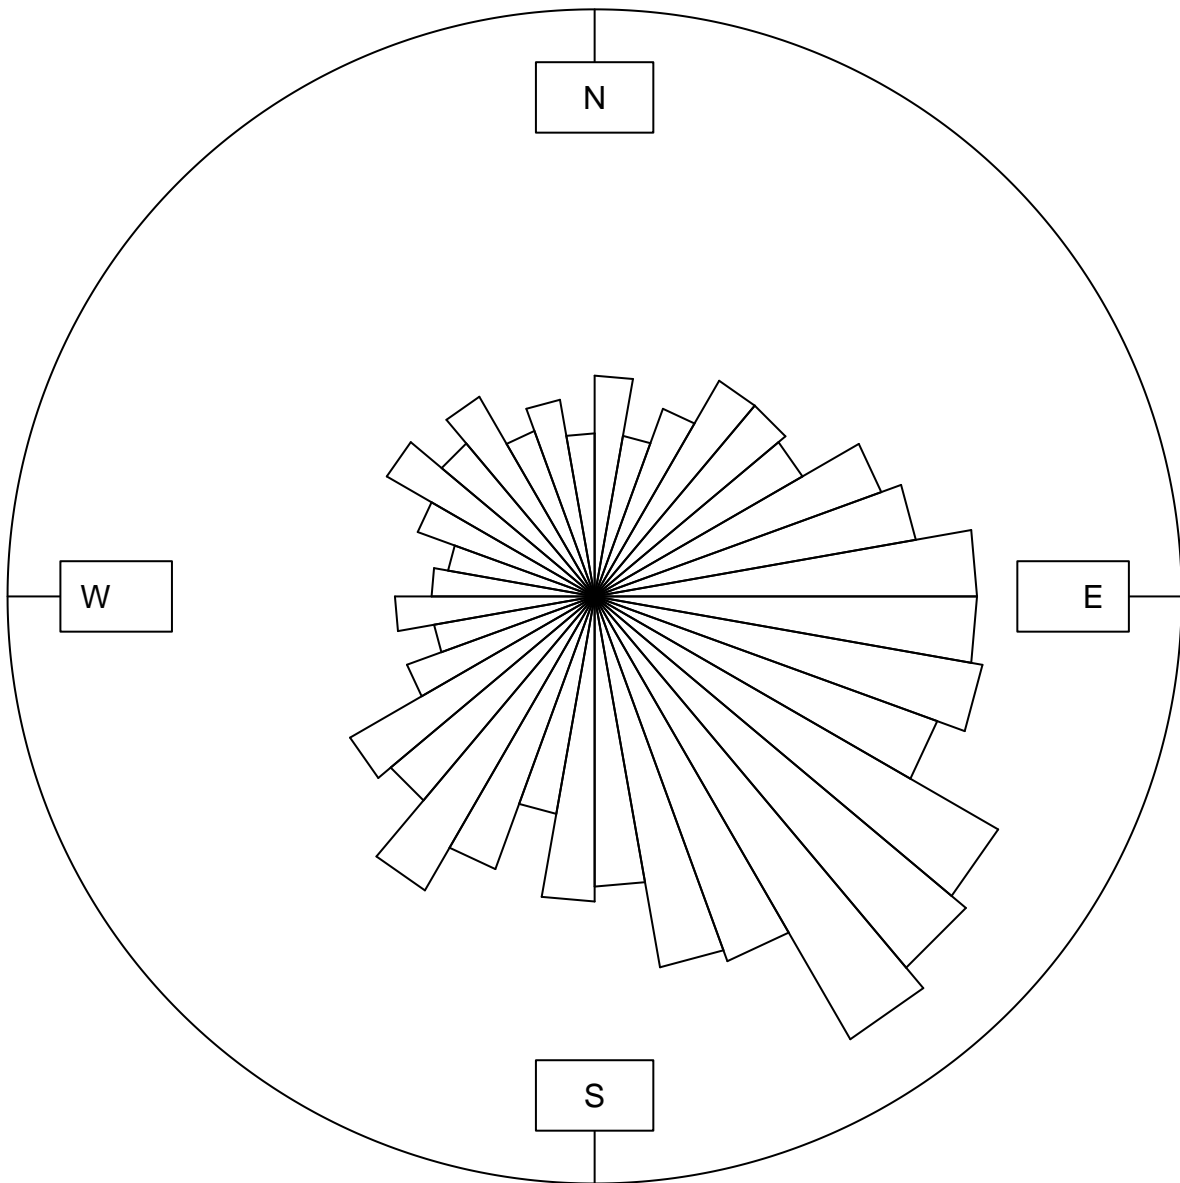



# bootstrap 145

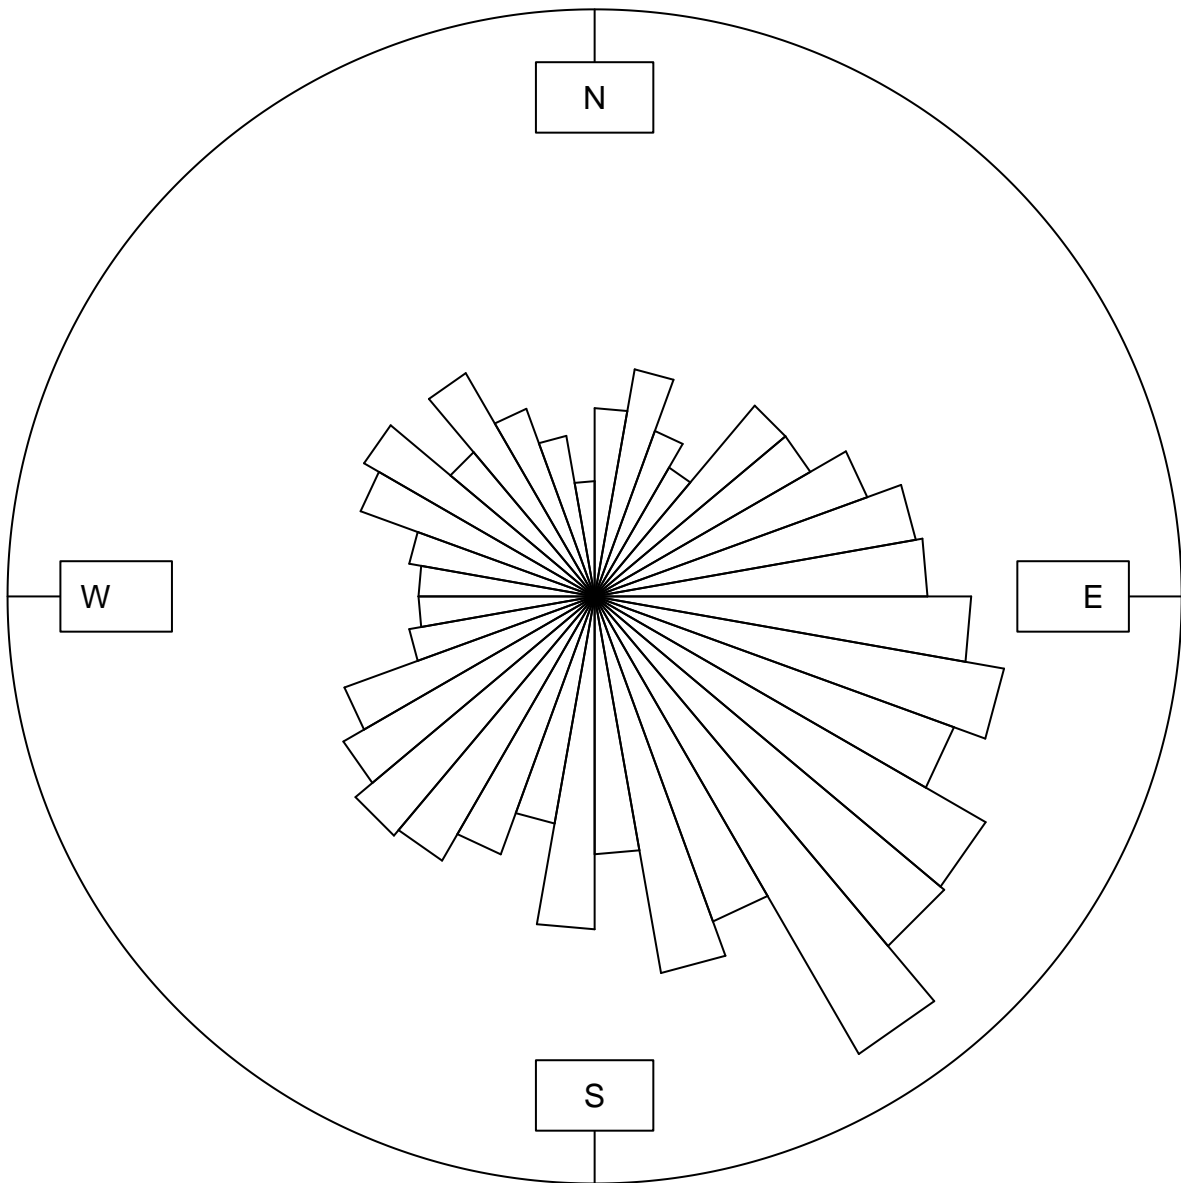

# bootstrap 146

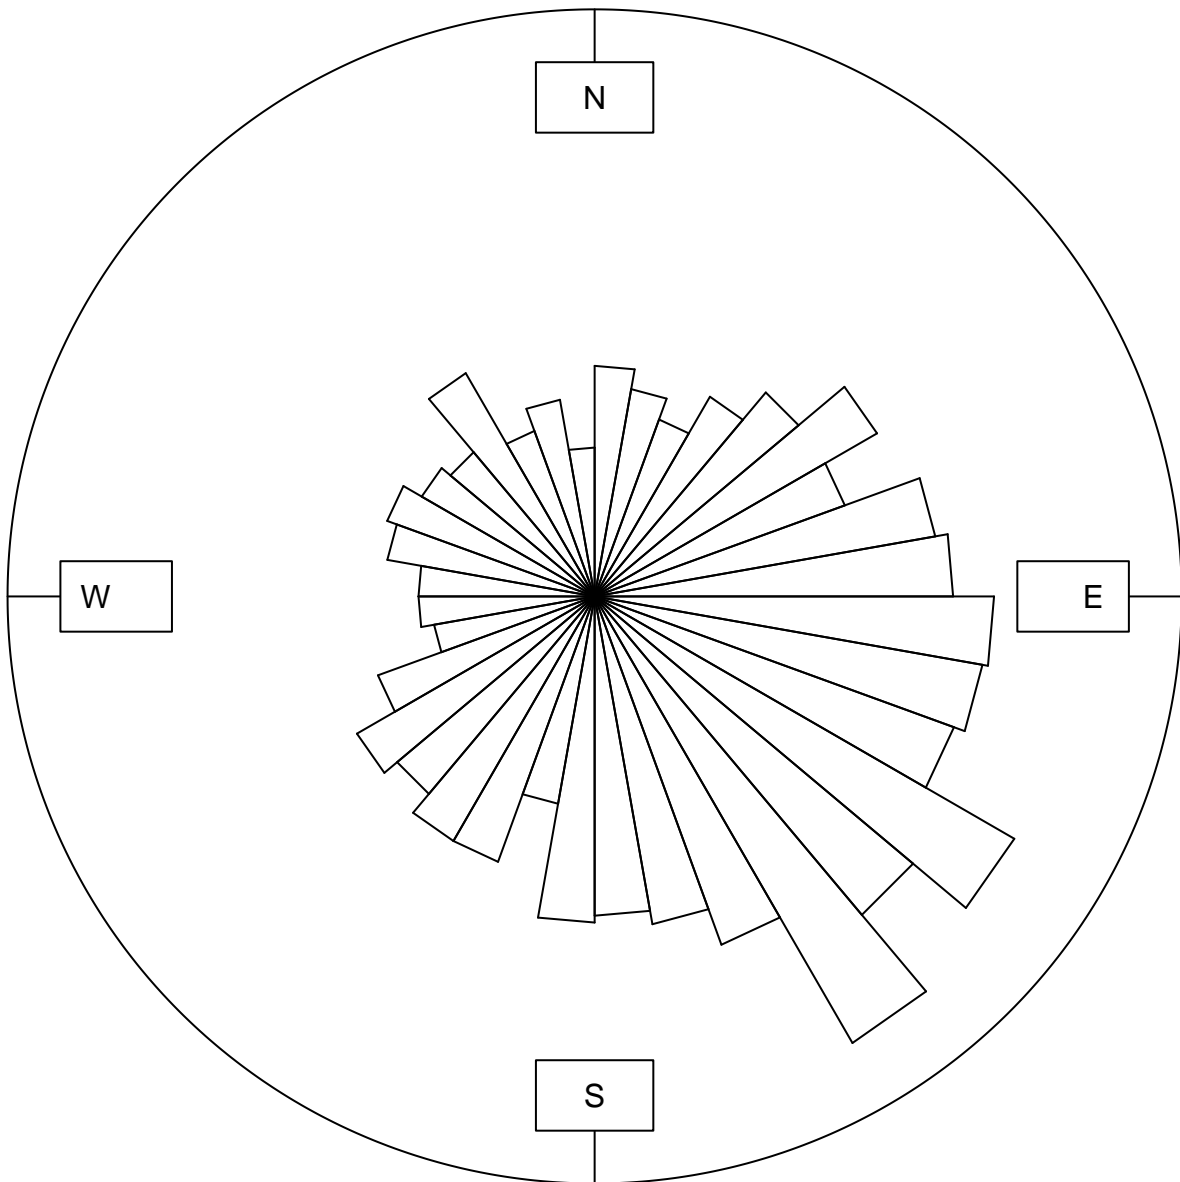

**bootstrap 147**

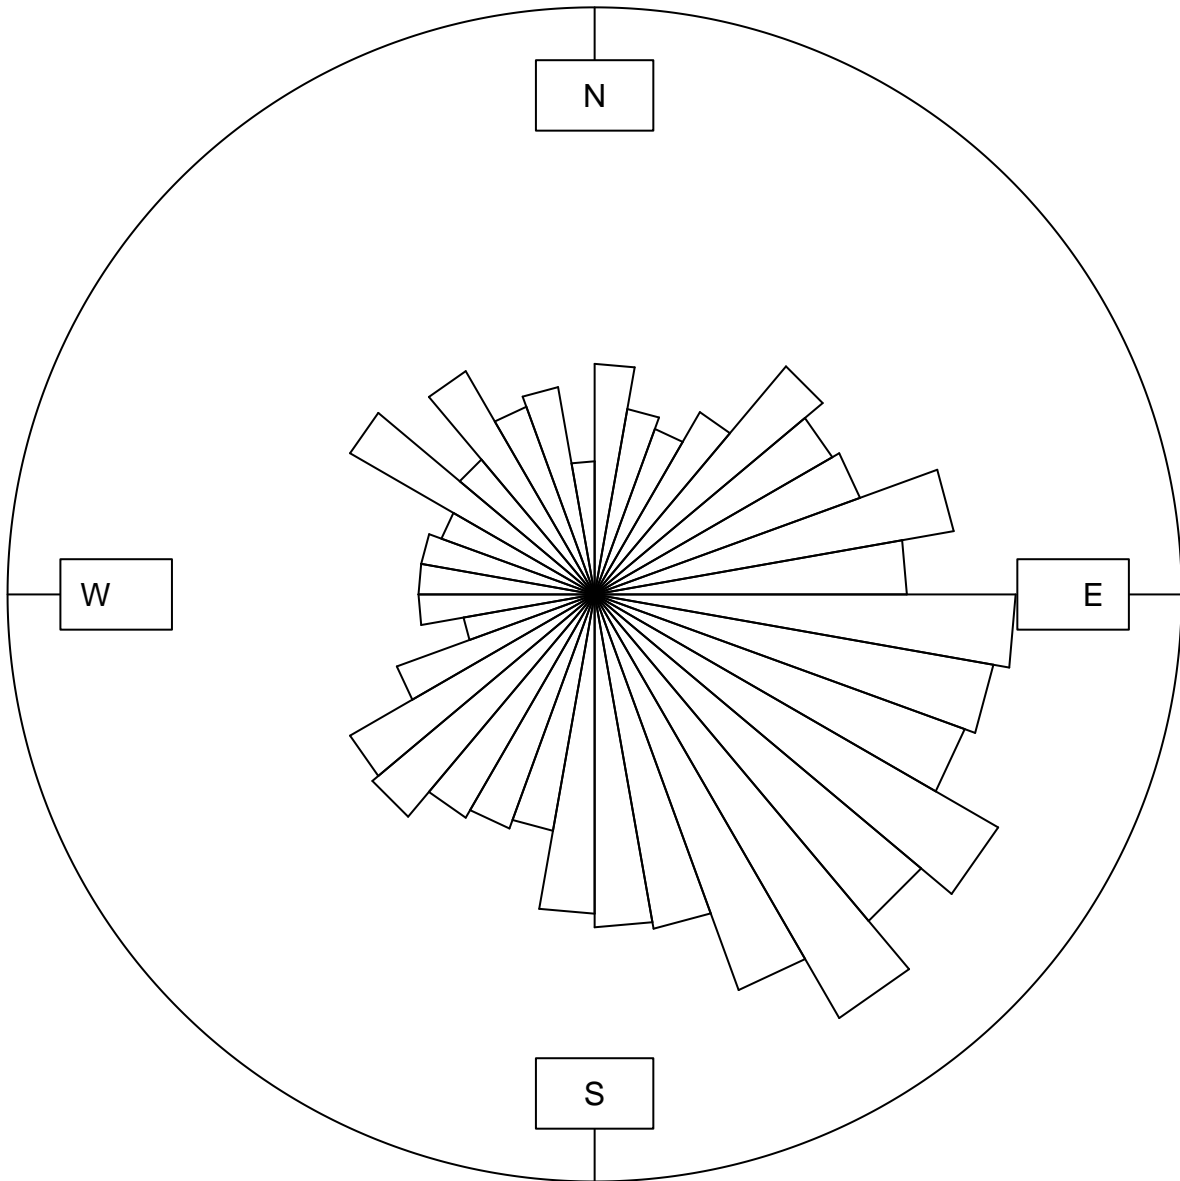

# bootstrap 148

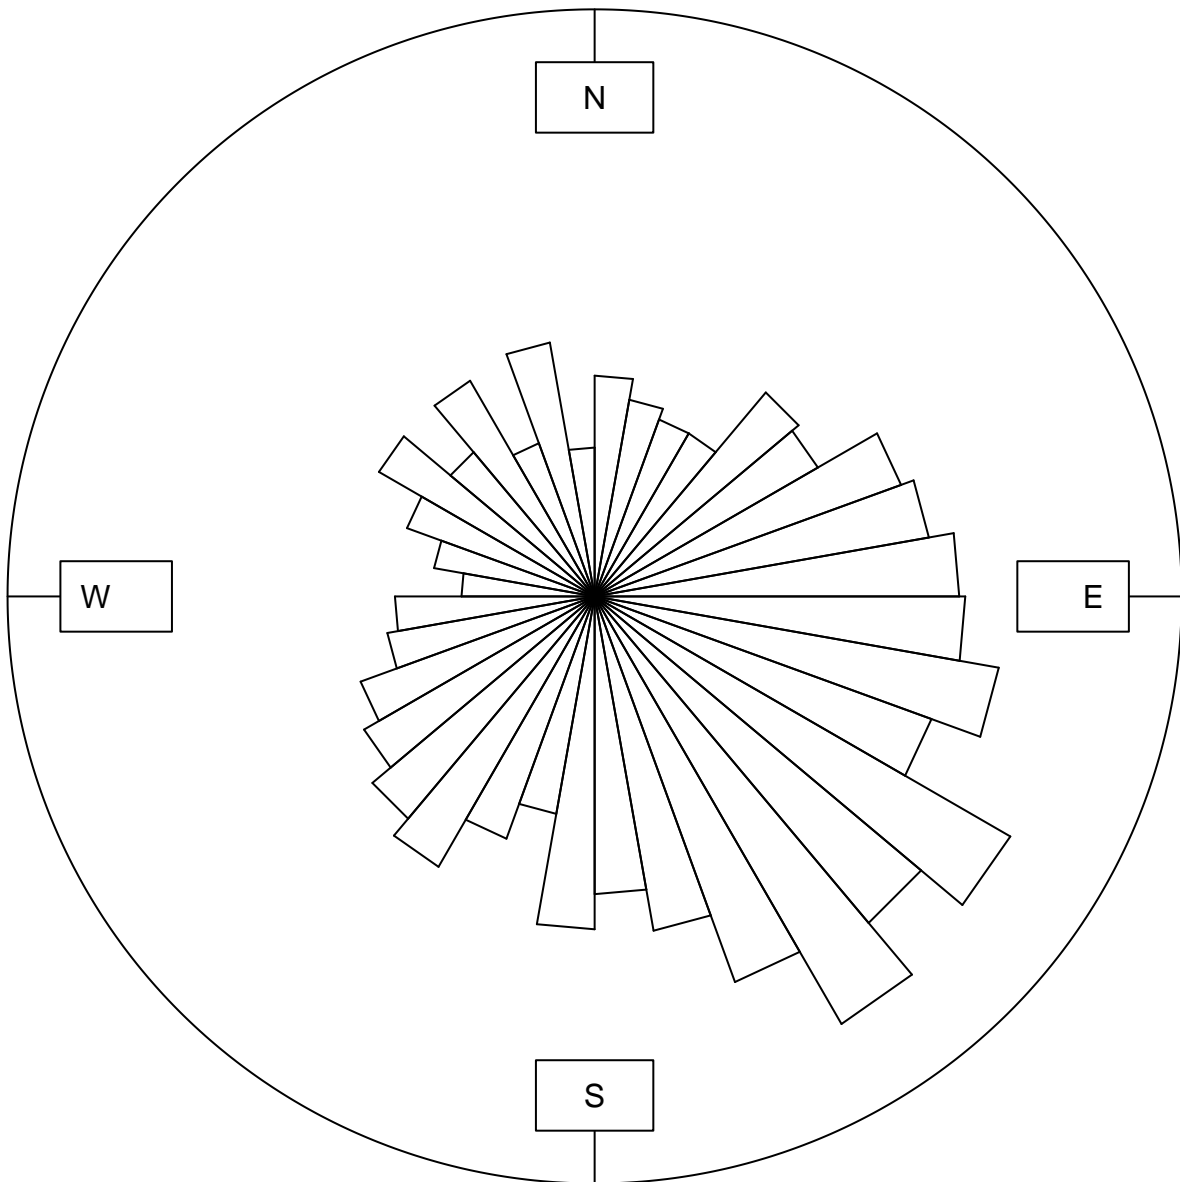

# bootstrap 149

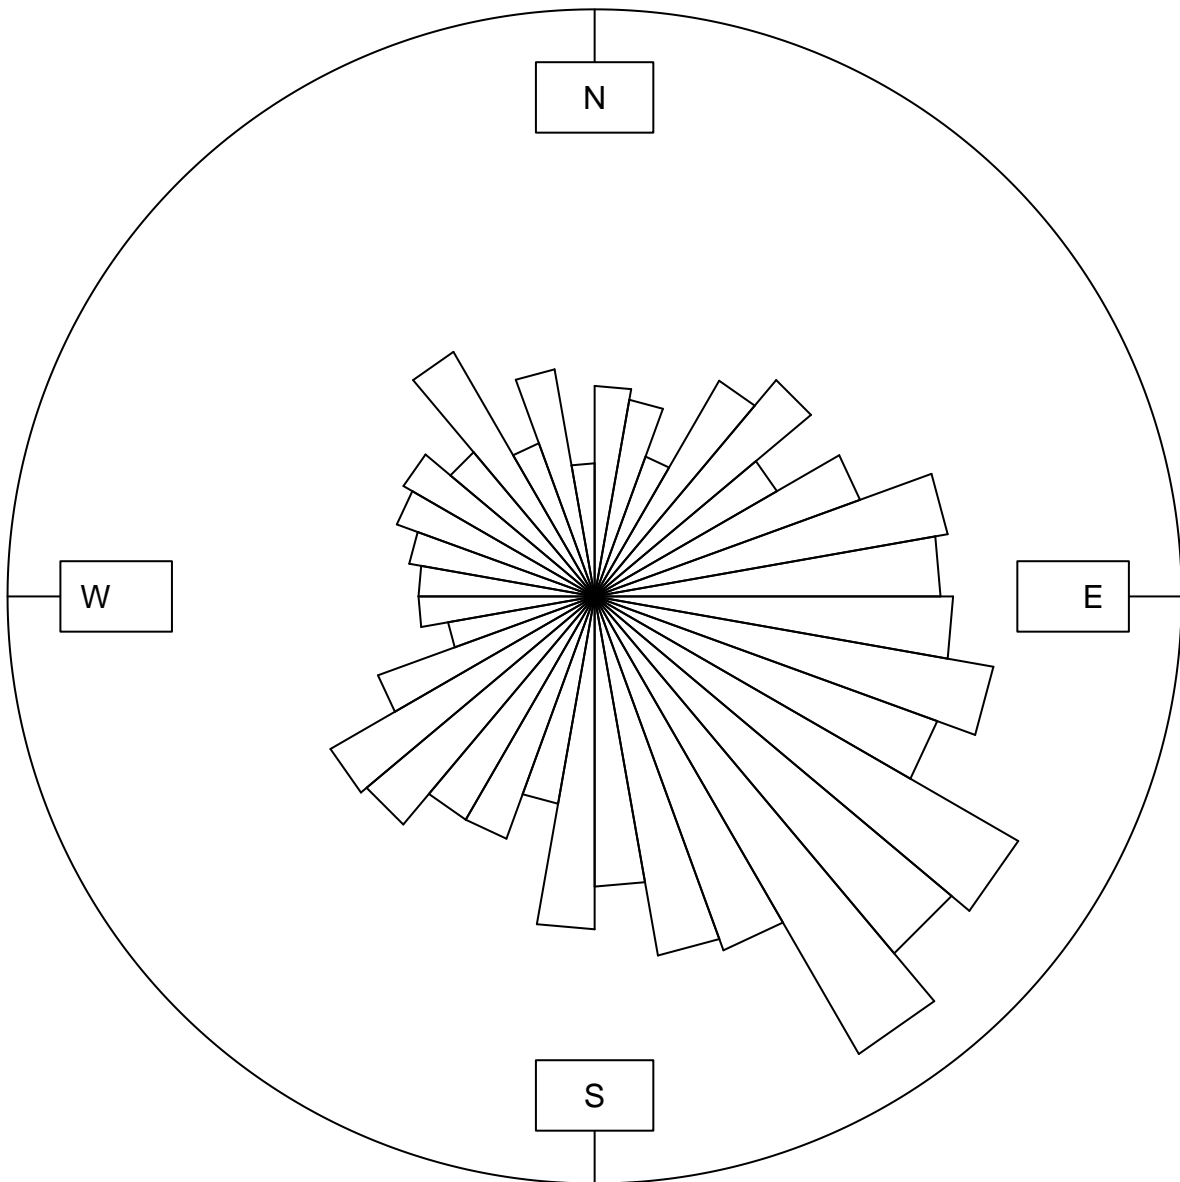

# bootstrap 150

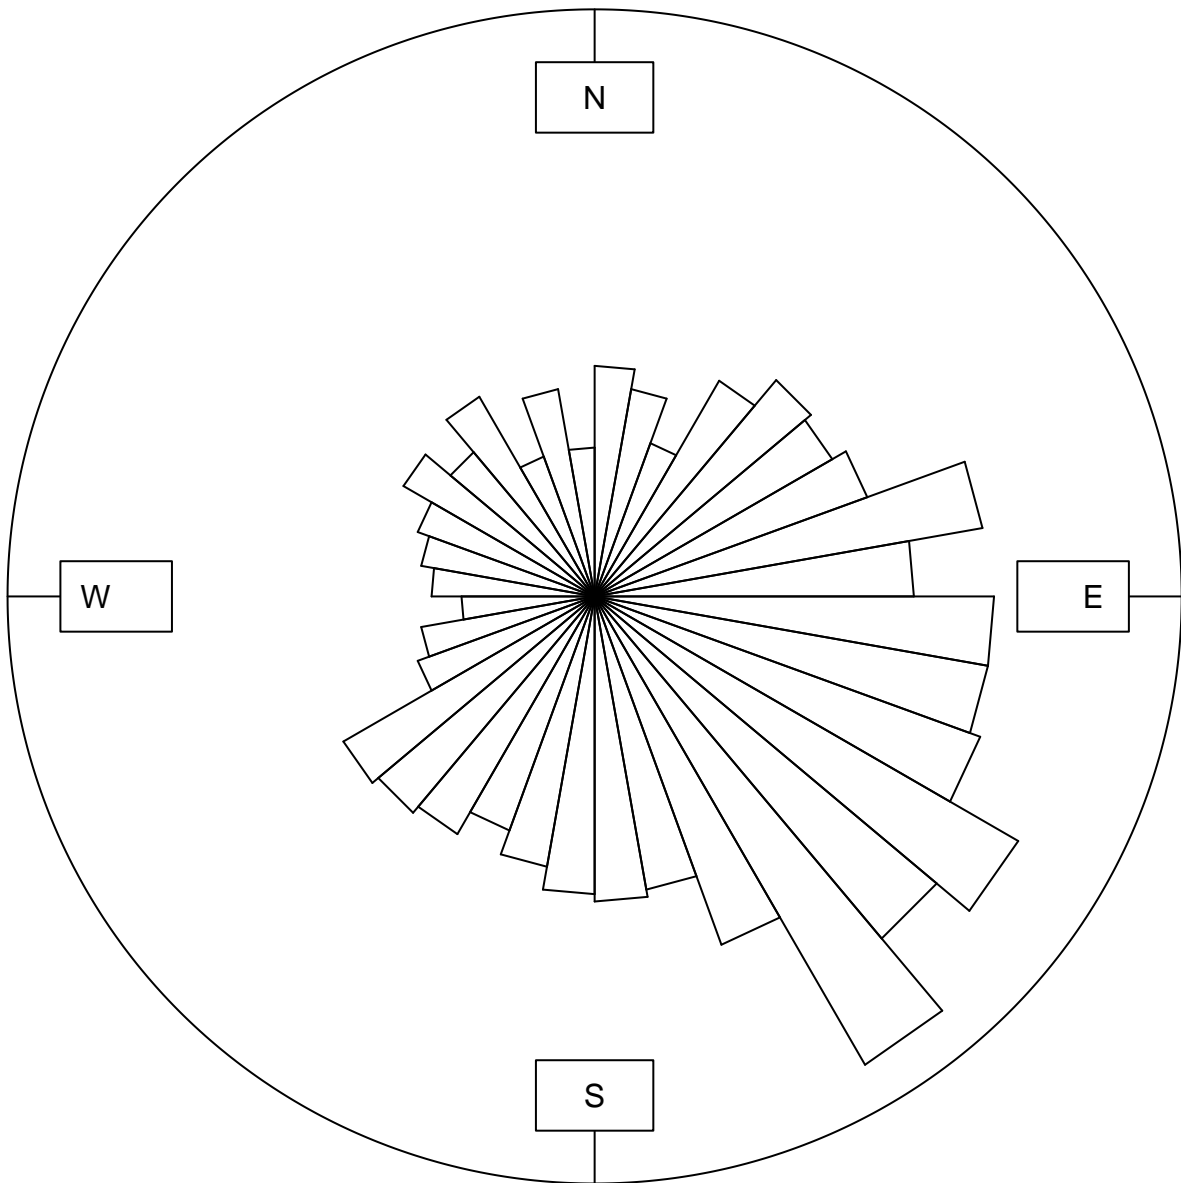

# bootstrap 151

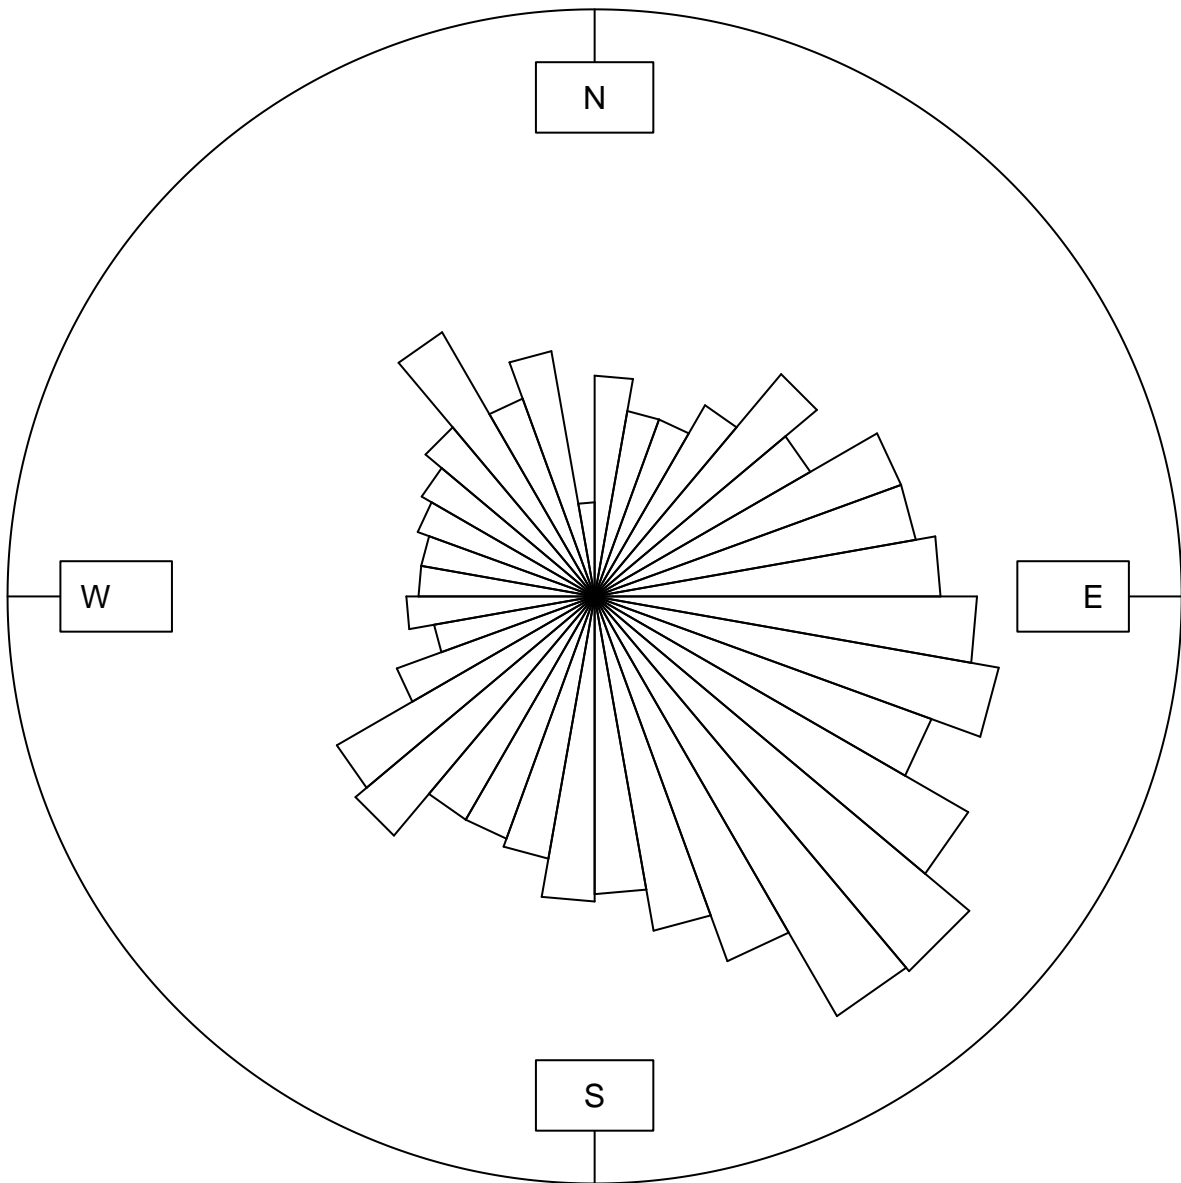

# bootstrap 152

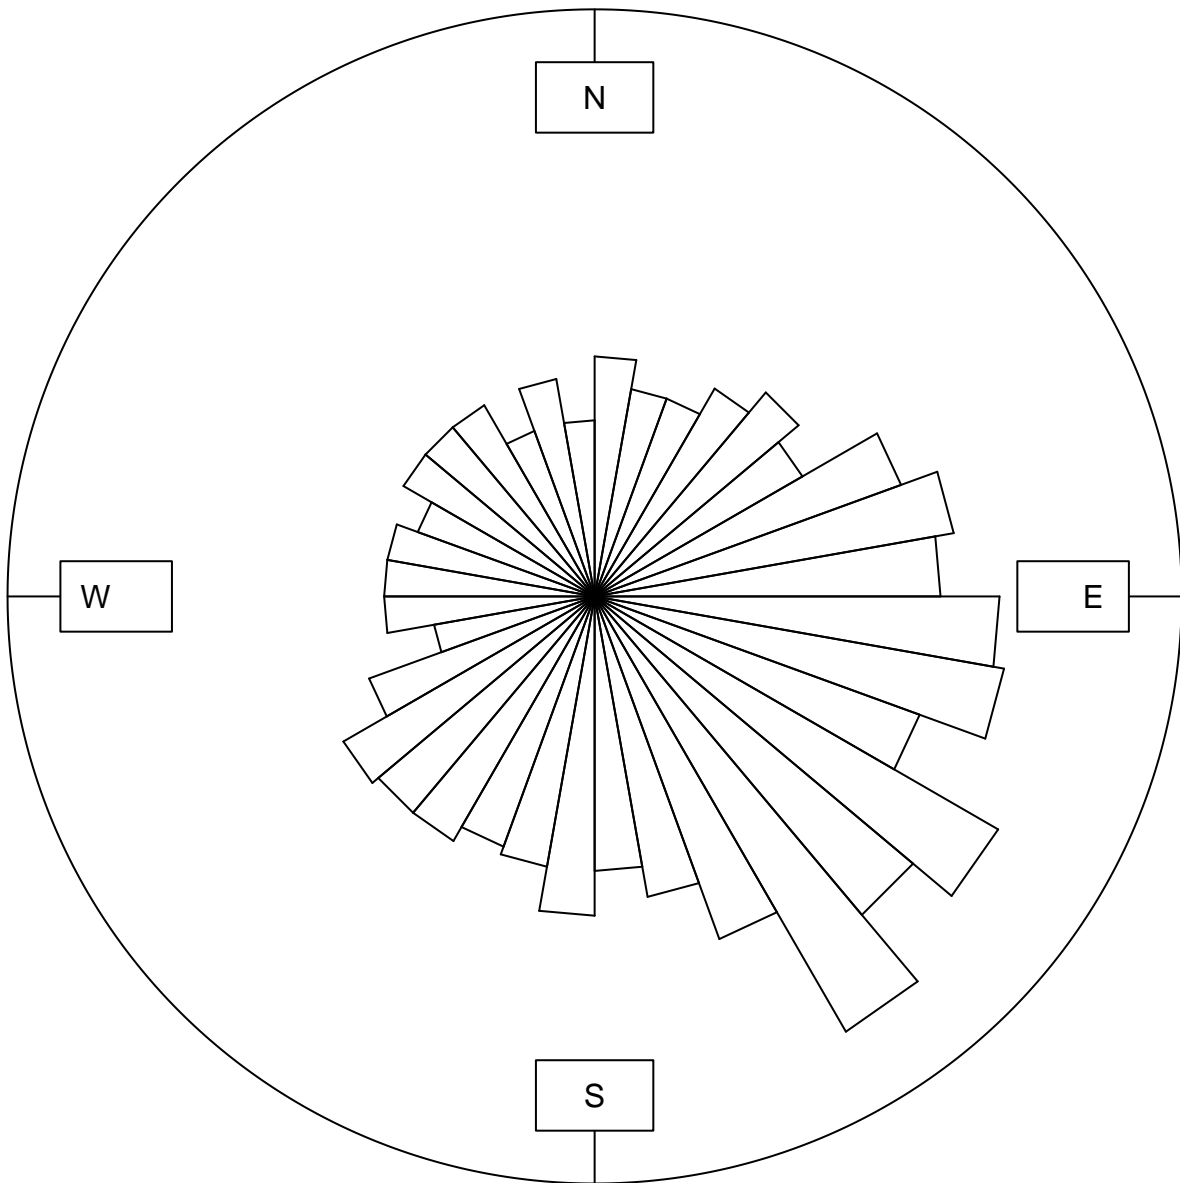



# bootstrap 153

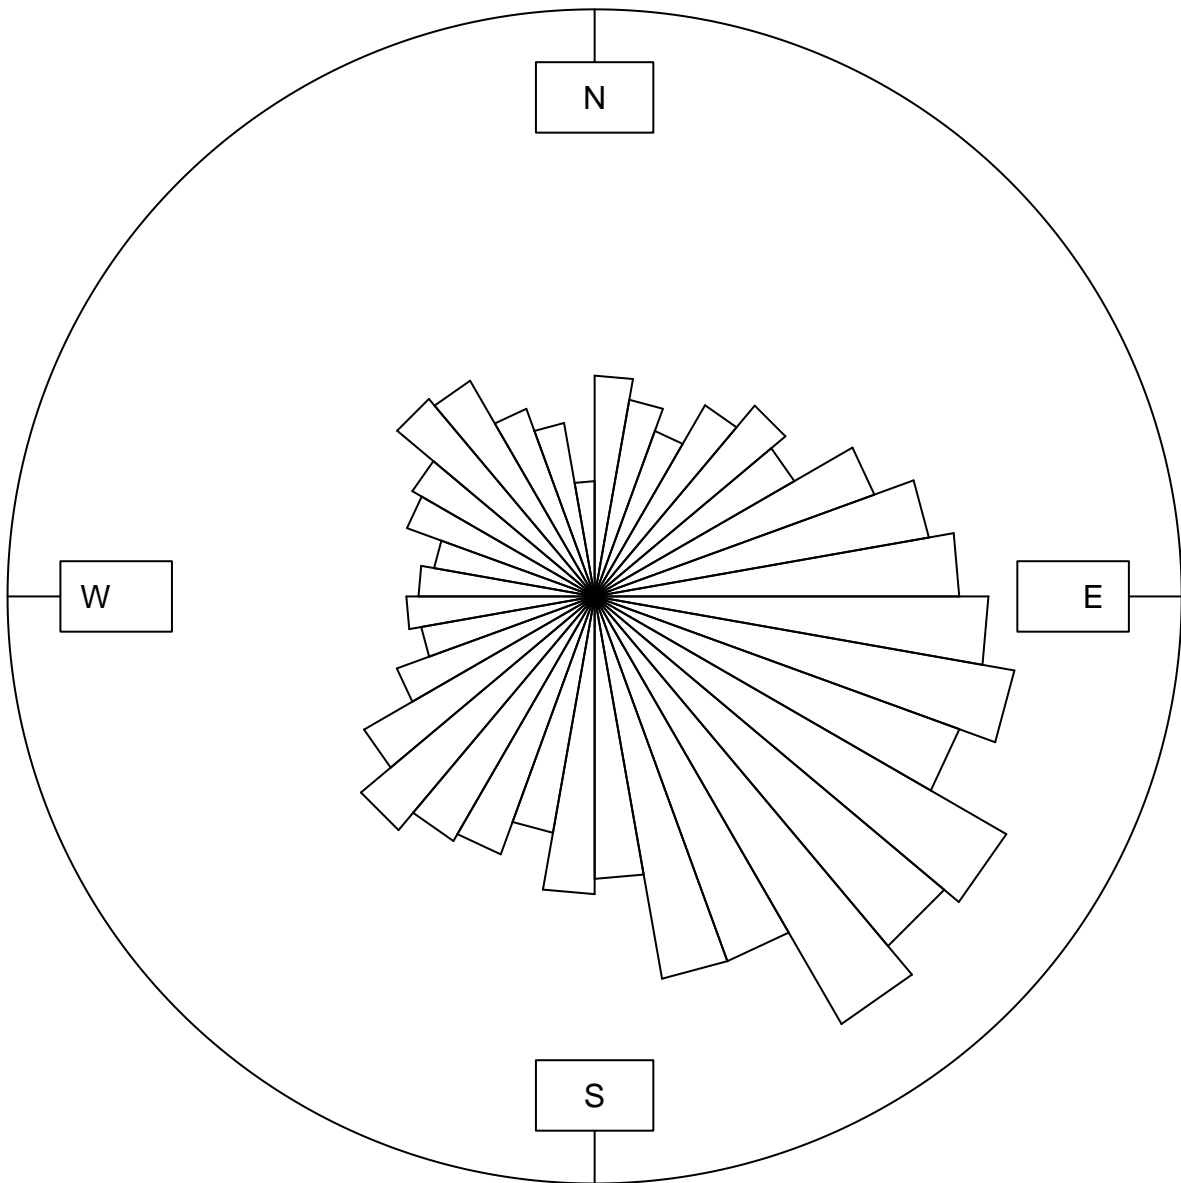

# bootstrap 154

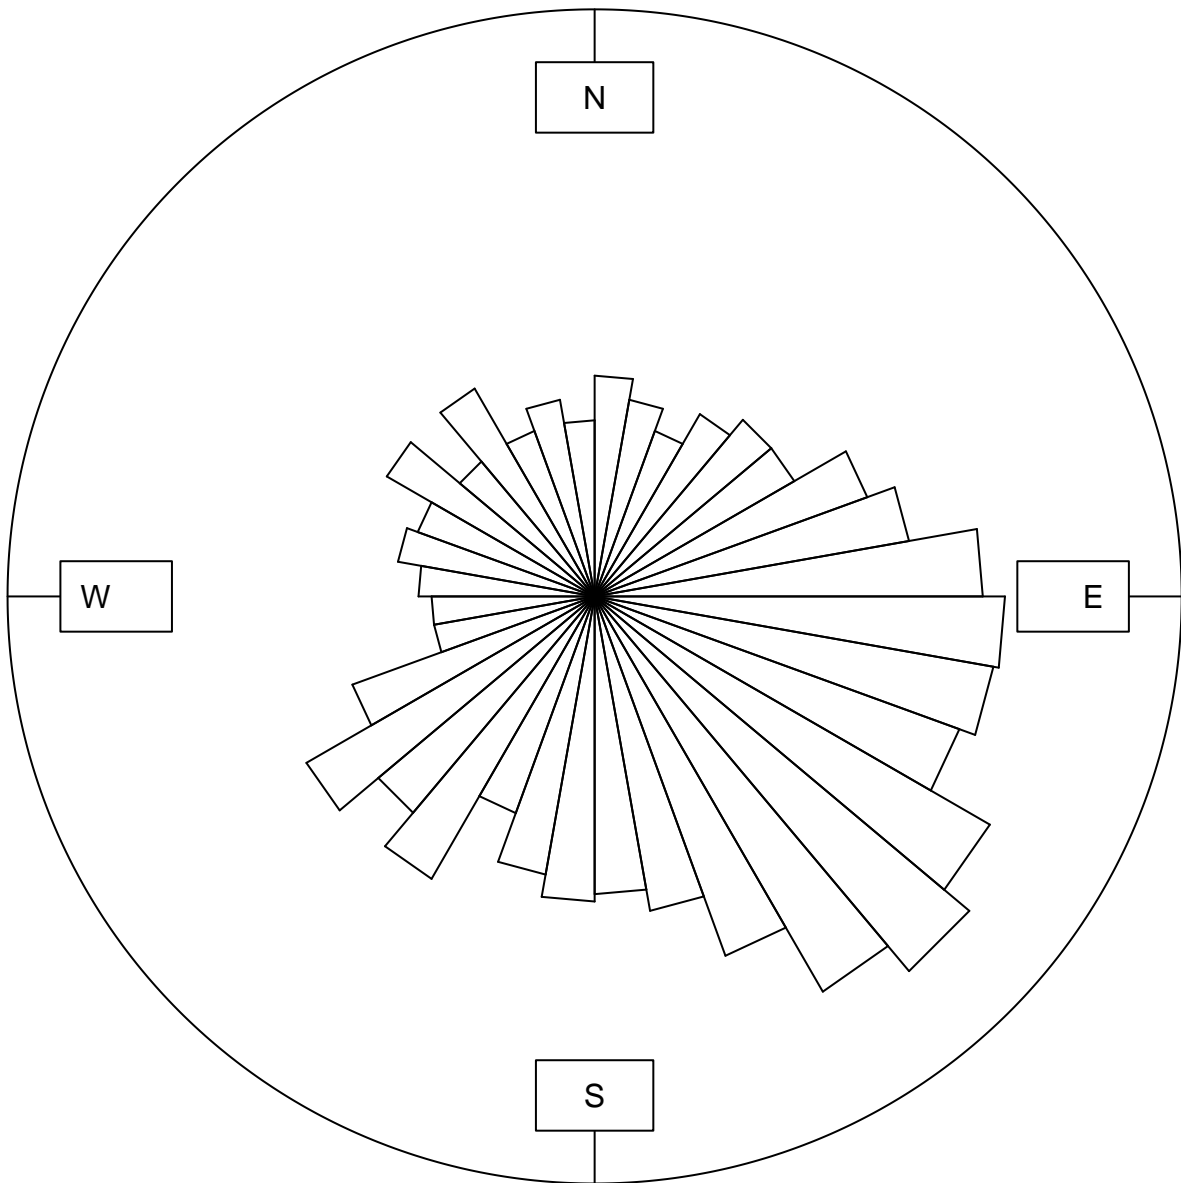

# bootstrap 155

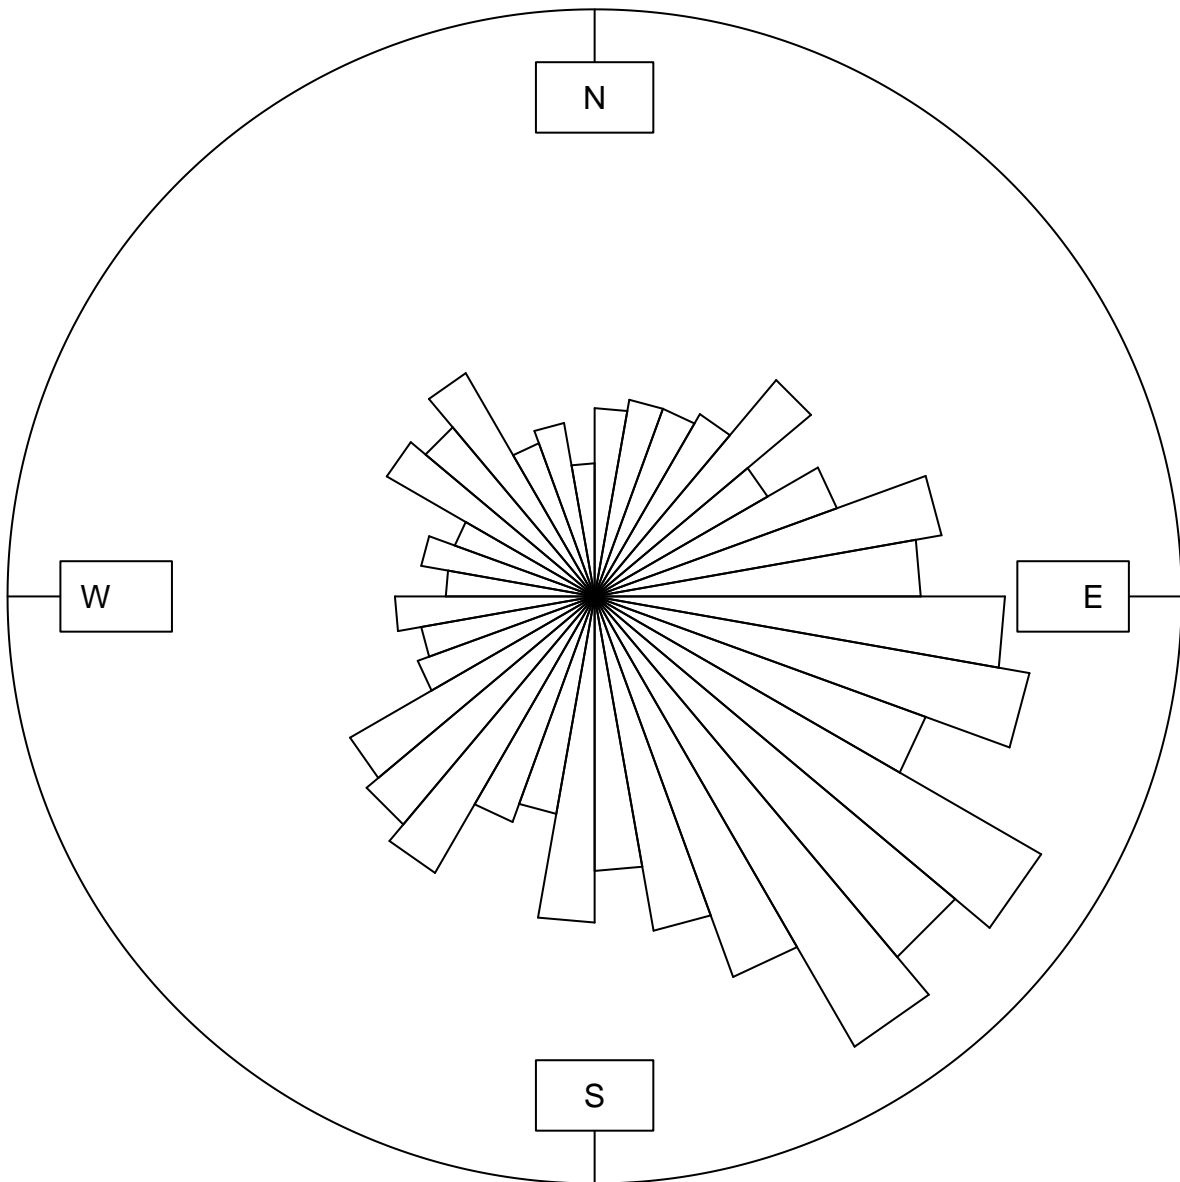

# bootstrap 156

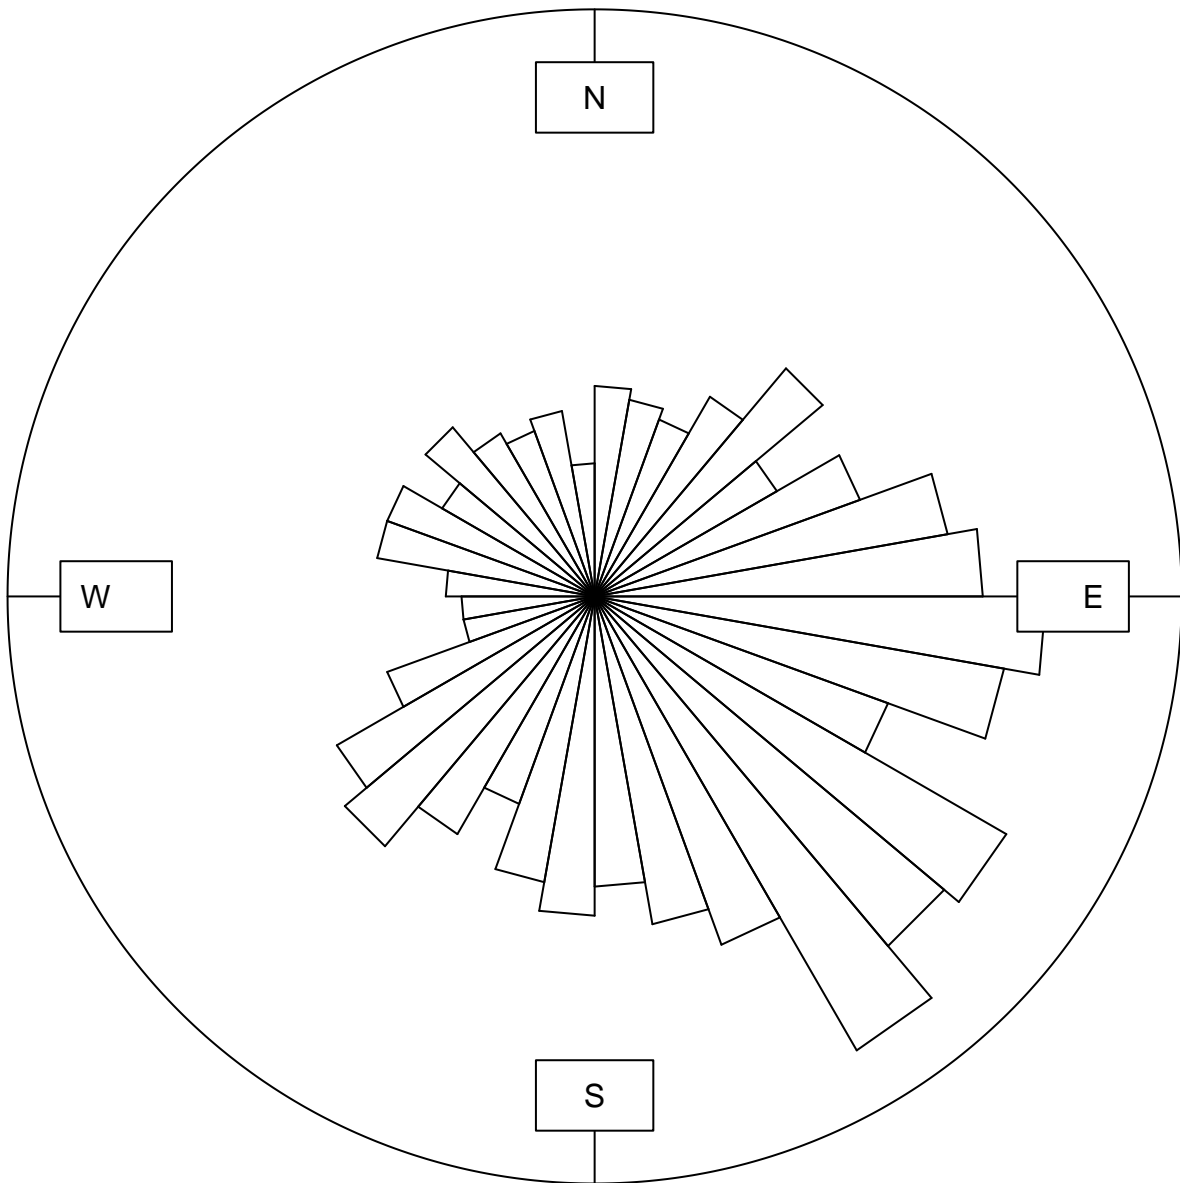

# bootstrap 157

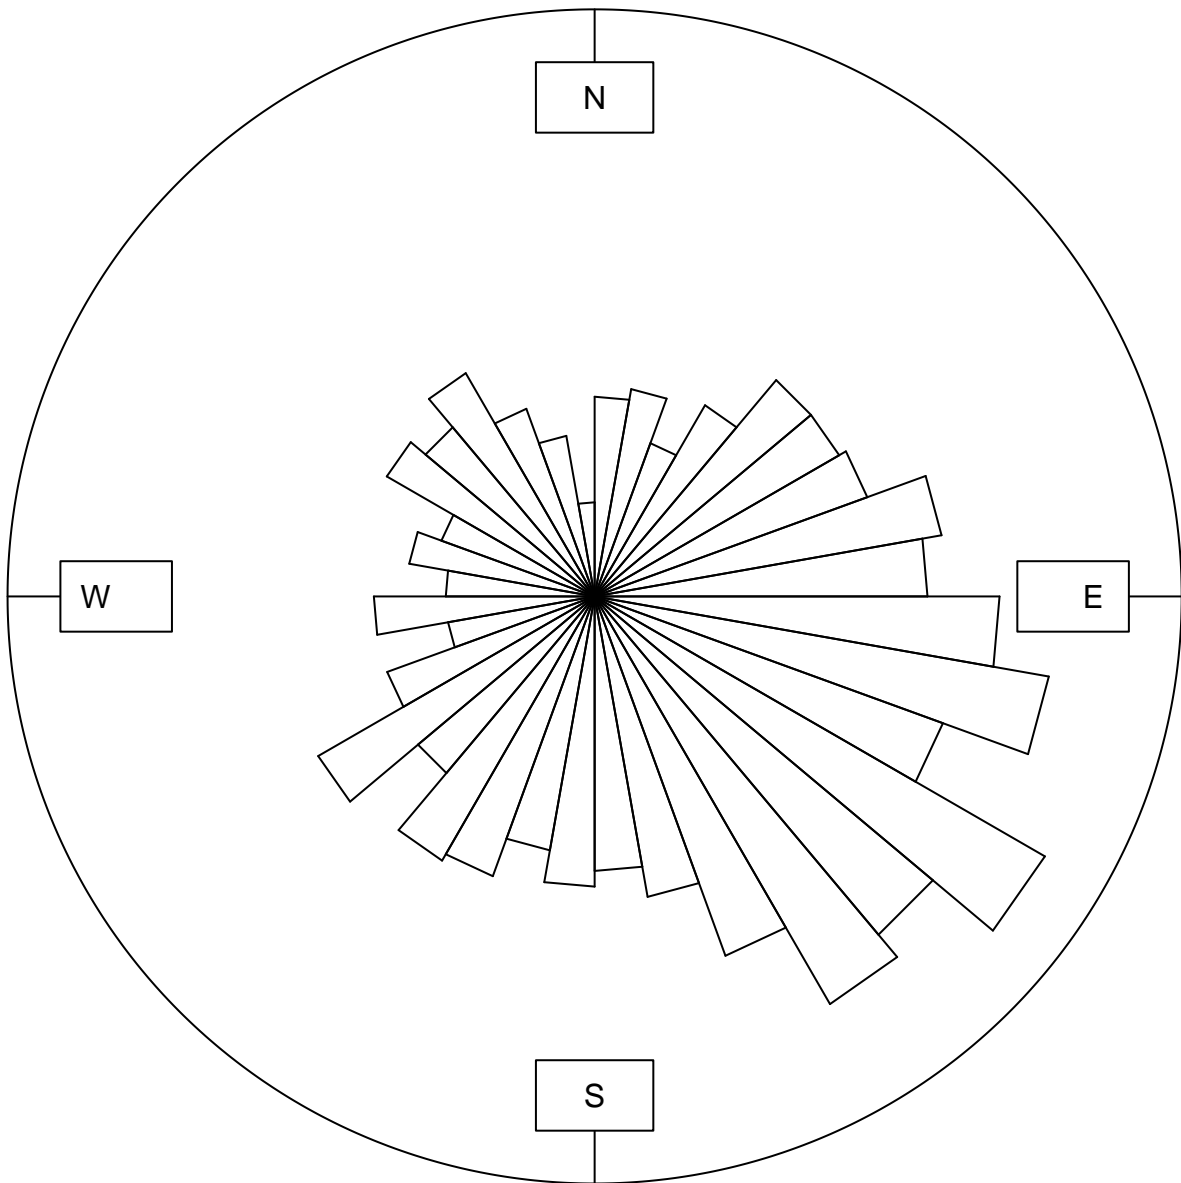

# bootstrap 158

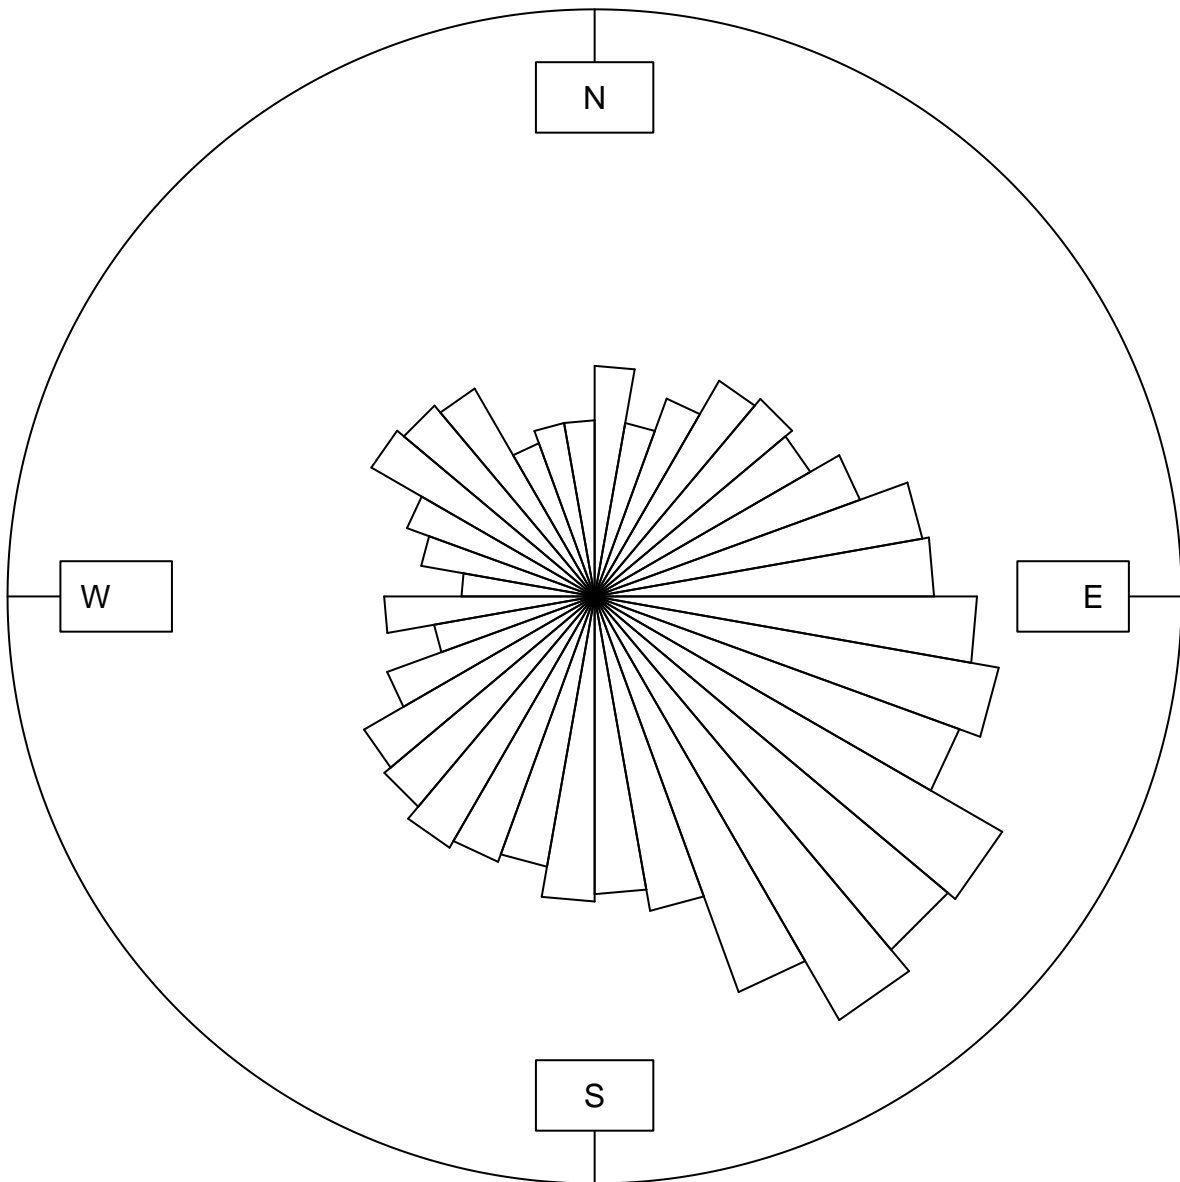

# bootstrap 159

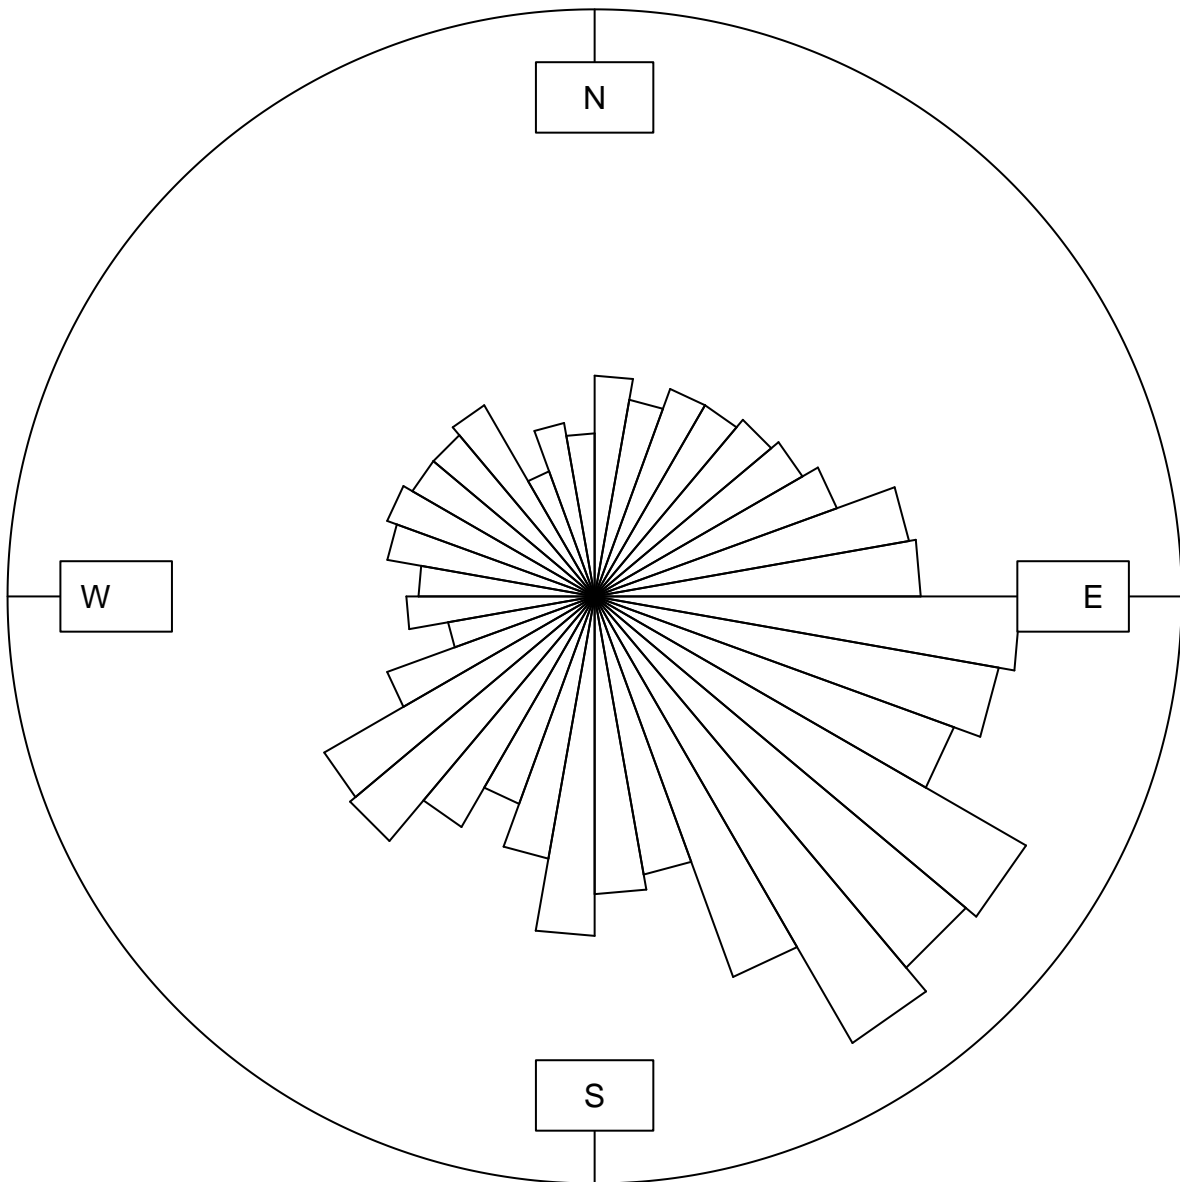

**bootstrap 160**

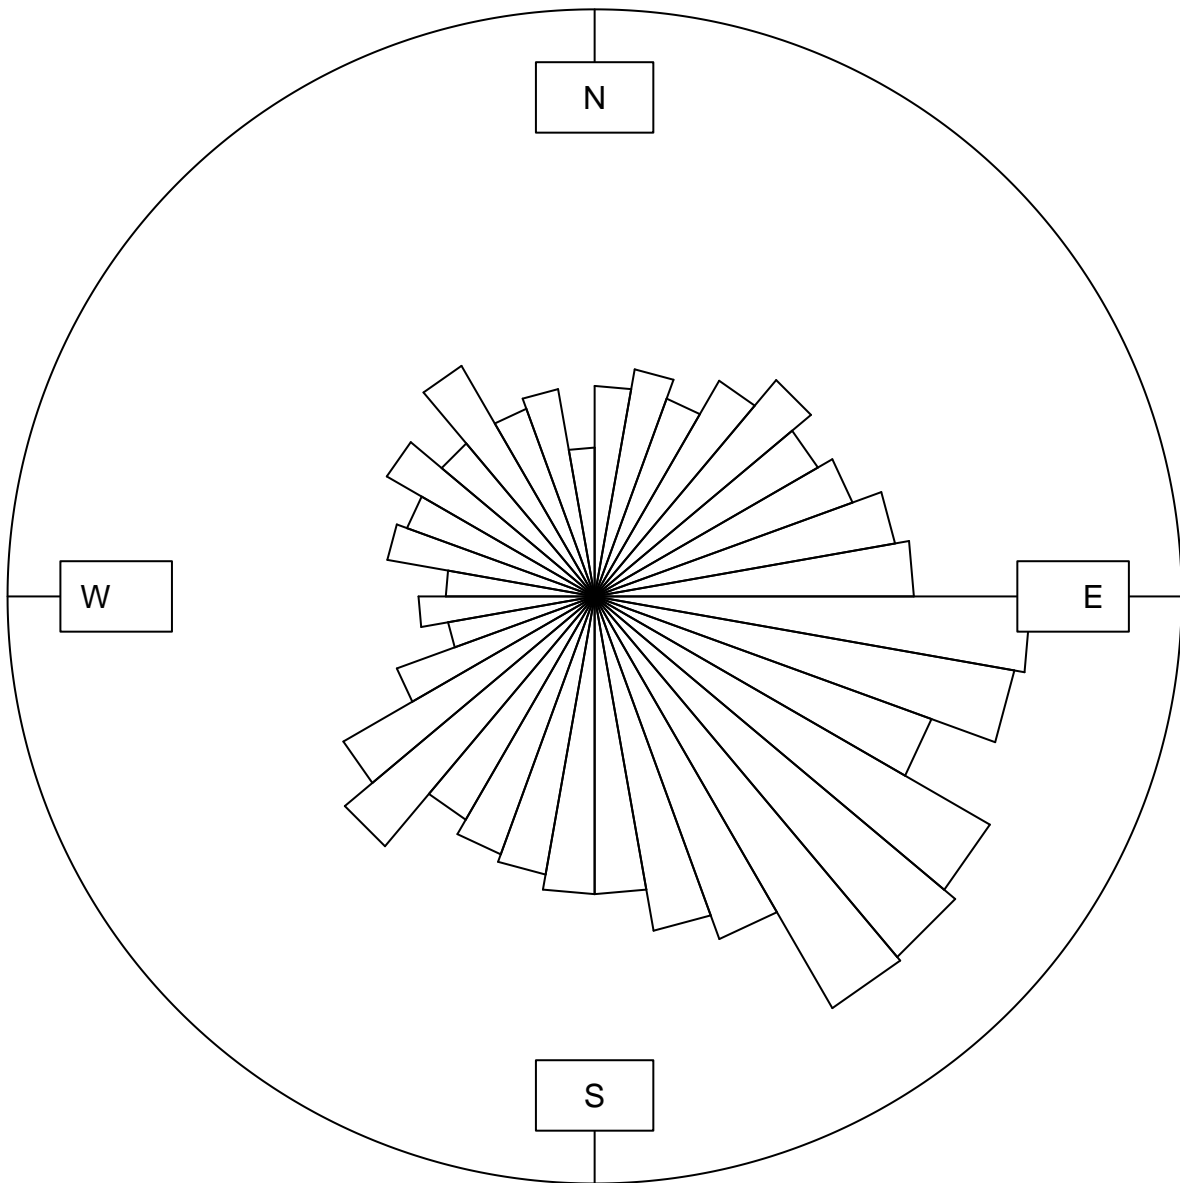



# bootstrap 161

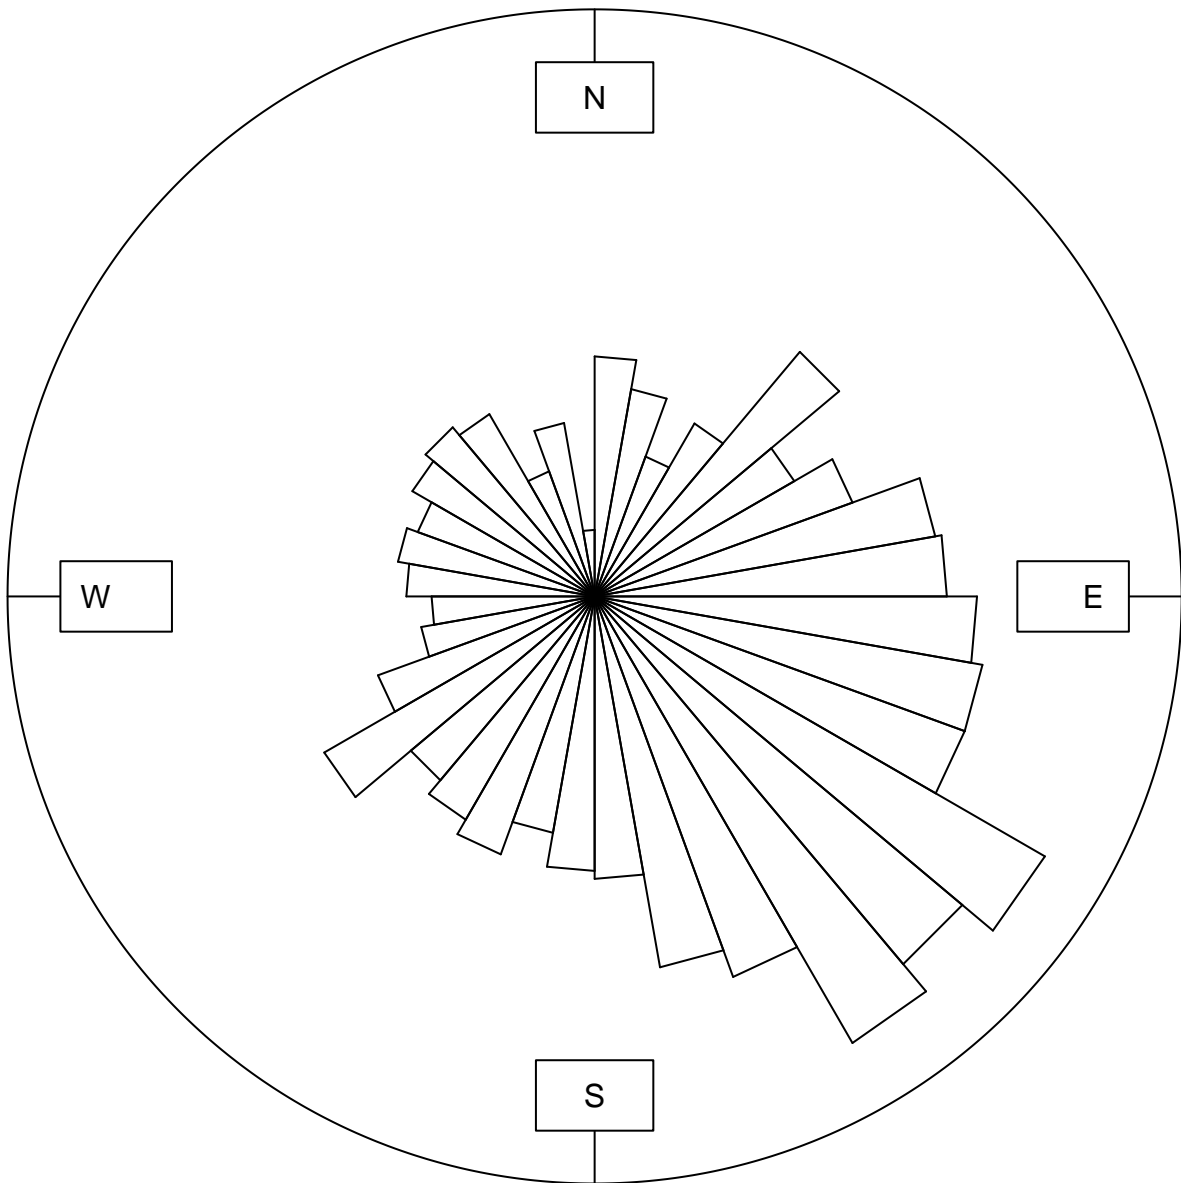

# bootstrap 162

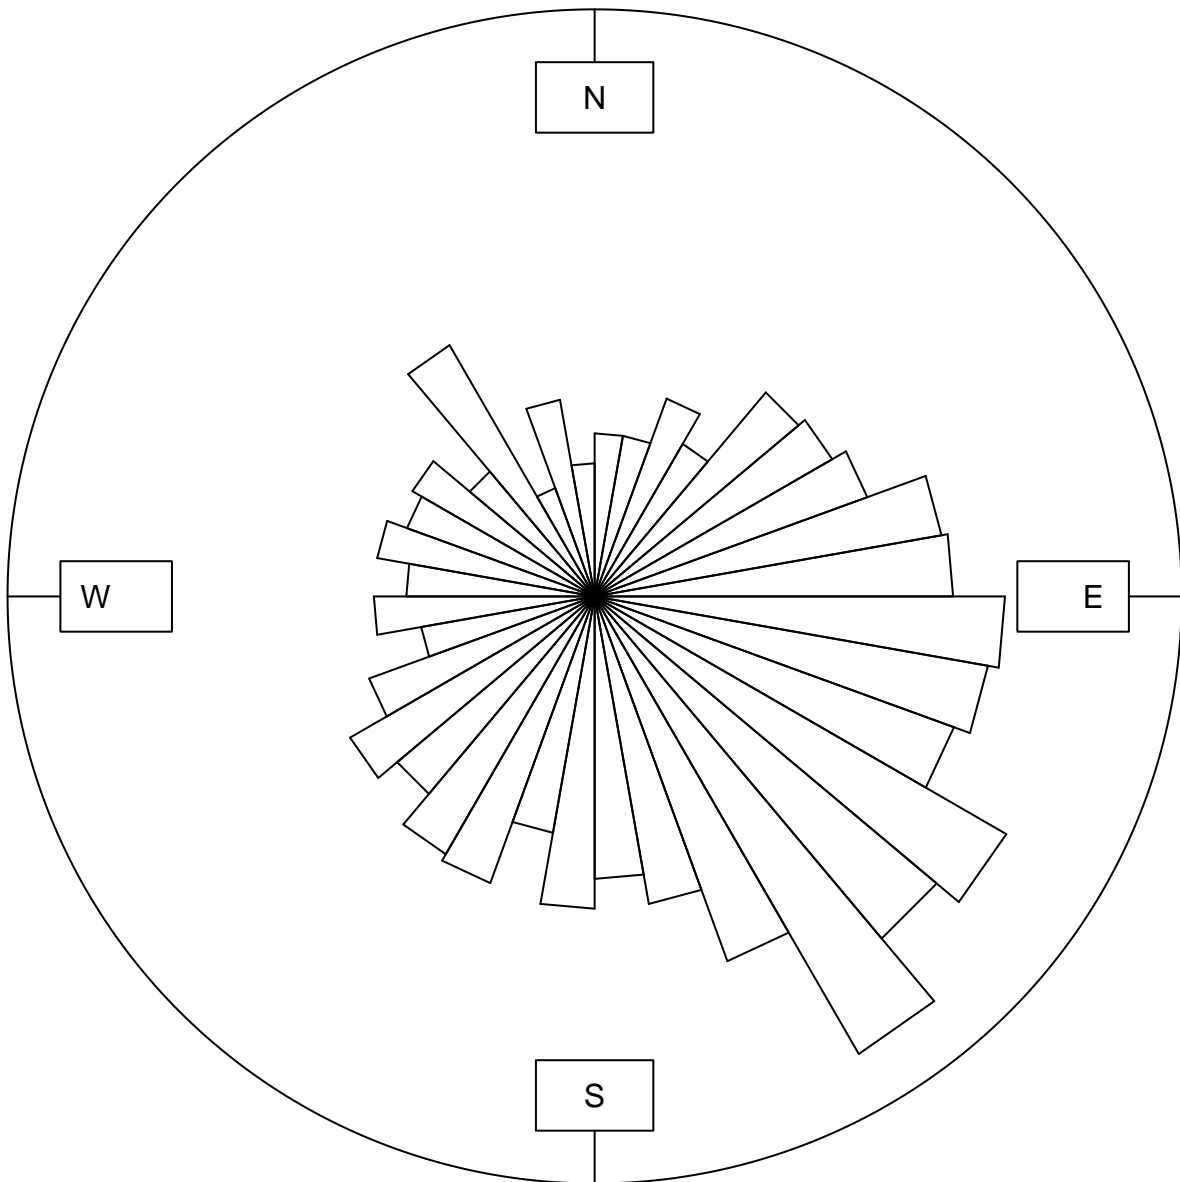

# bootstrap 163

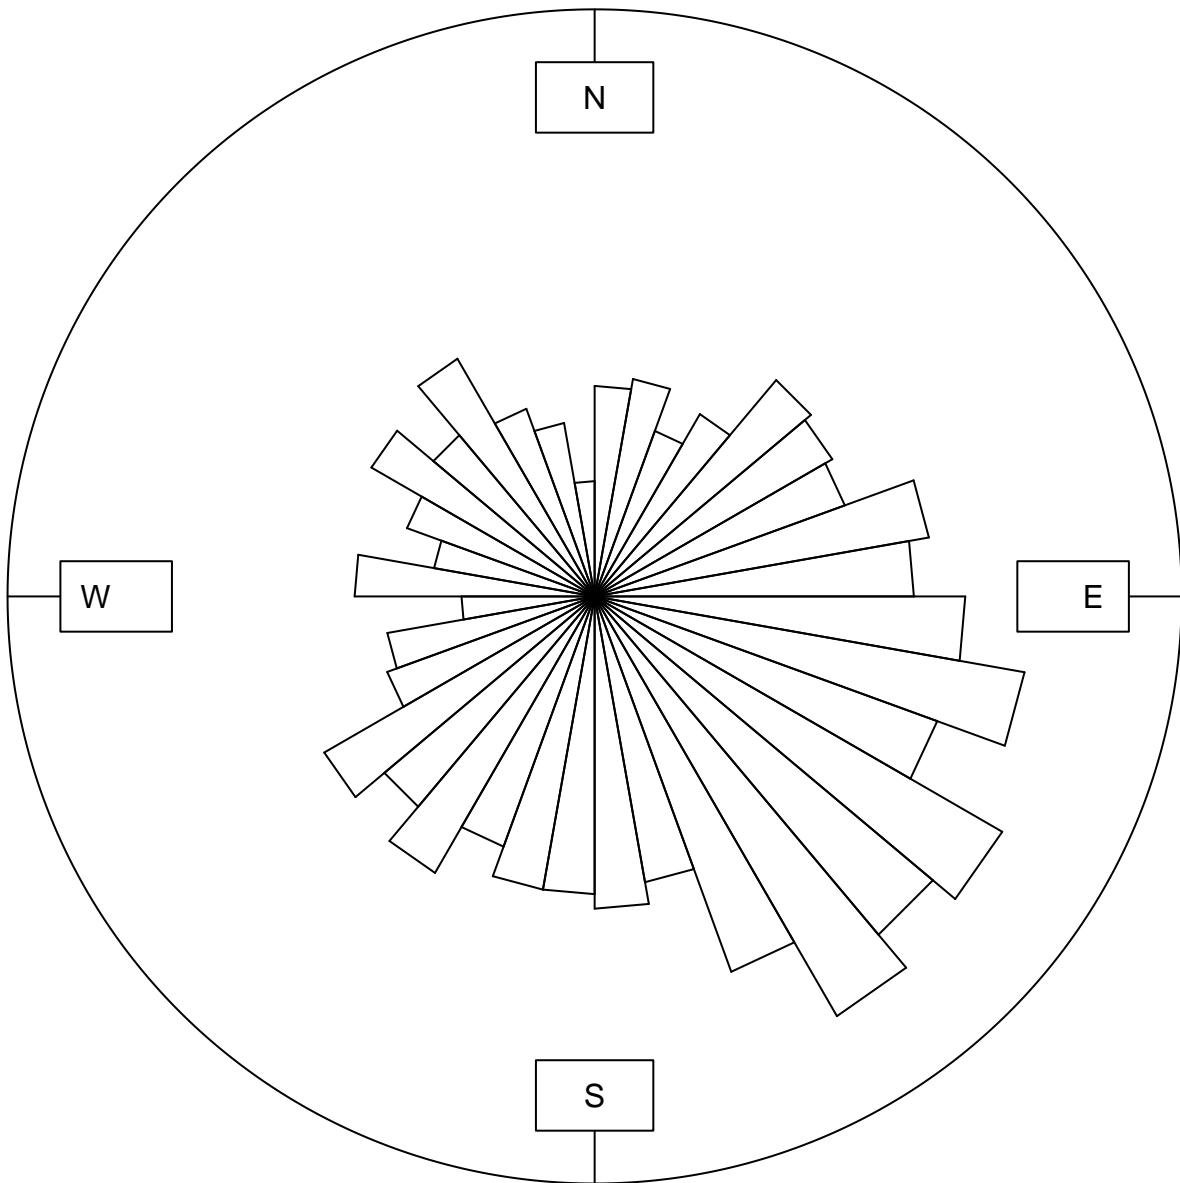

# bootstrap 164

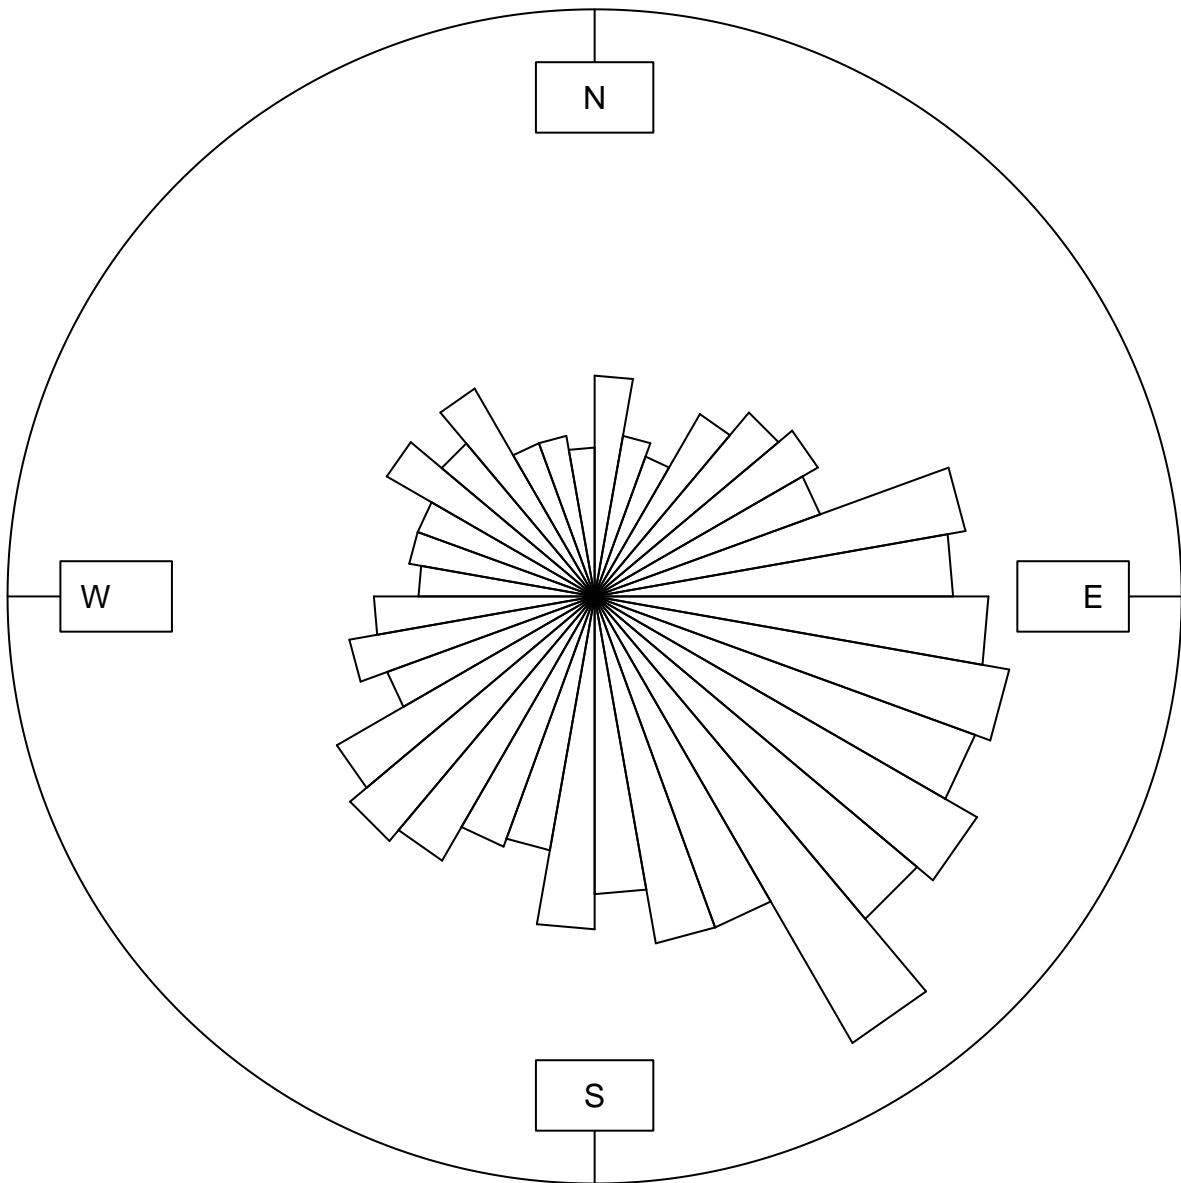

# bootstrap 165

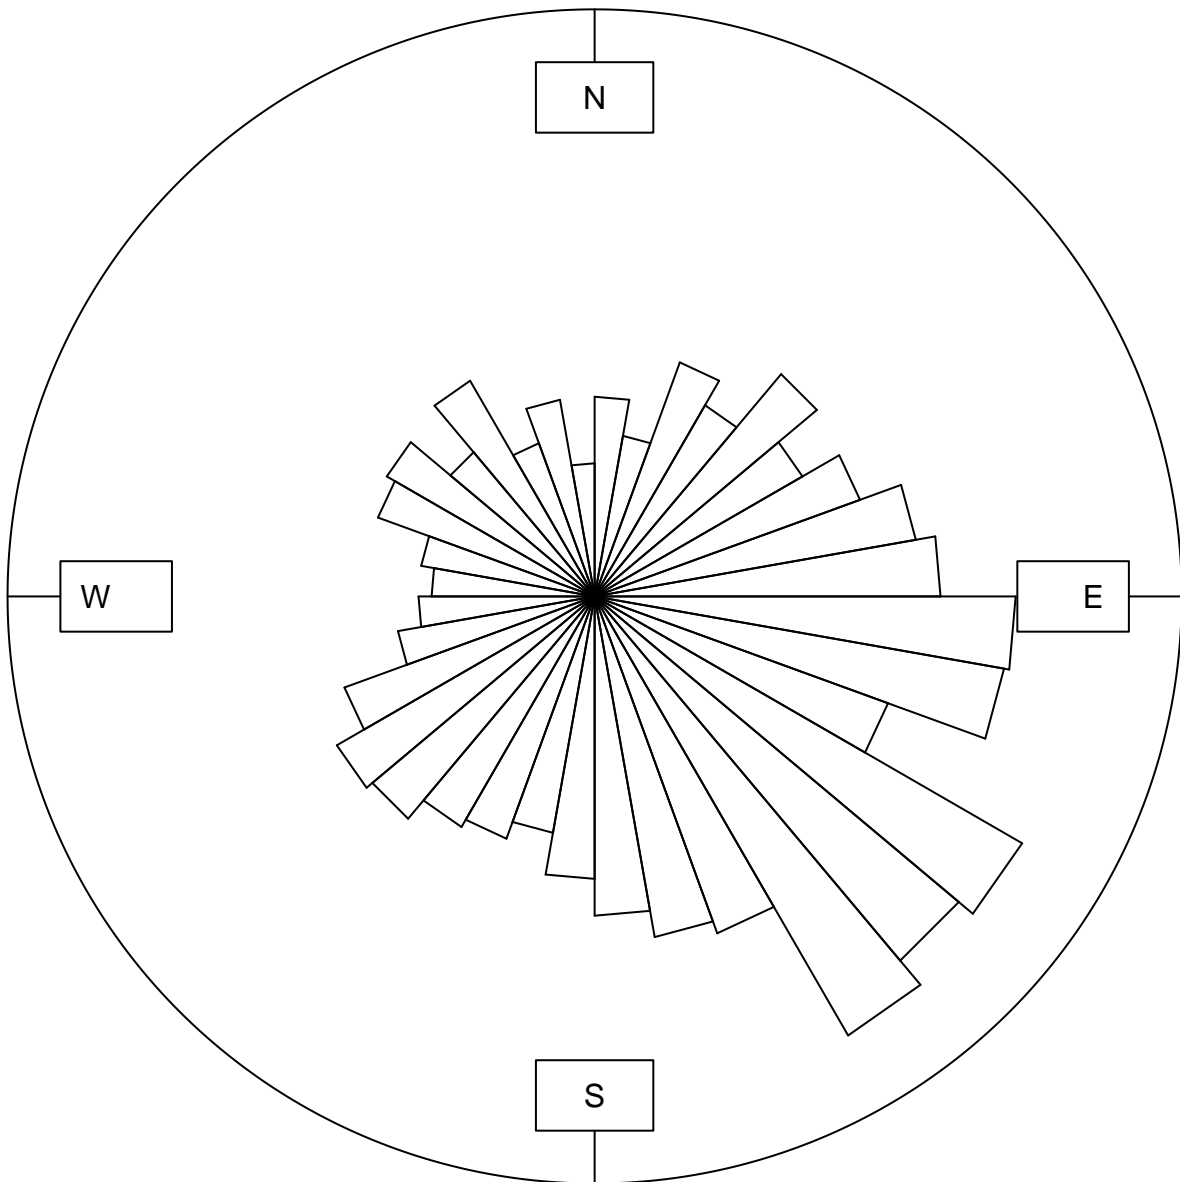

# bootstrap 166

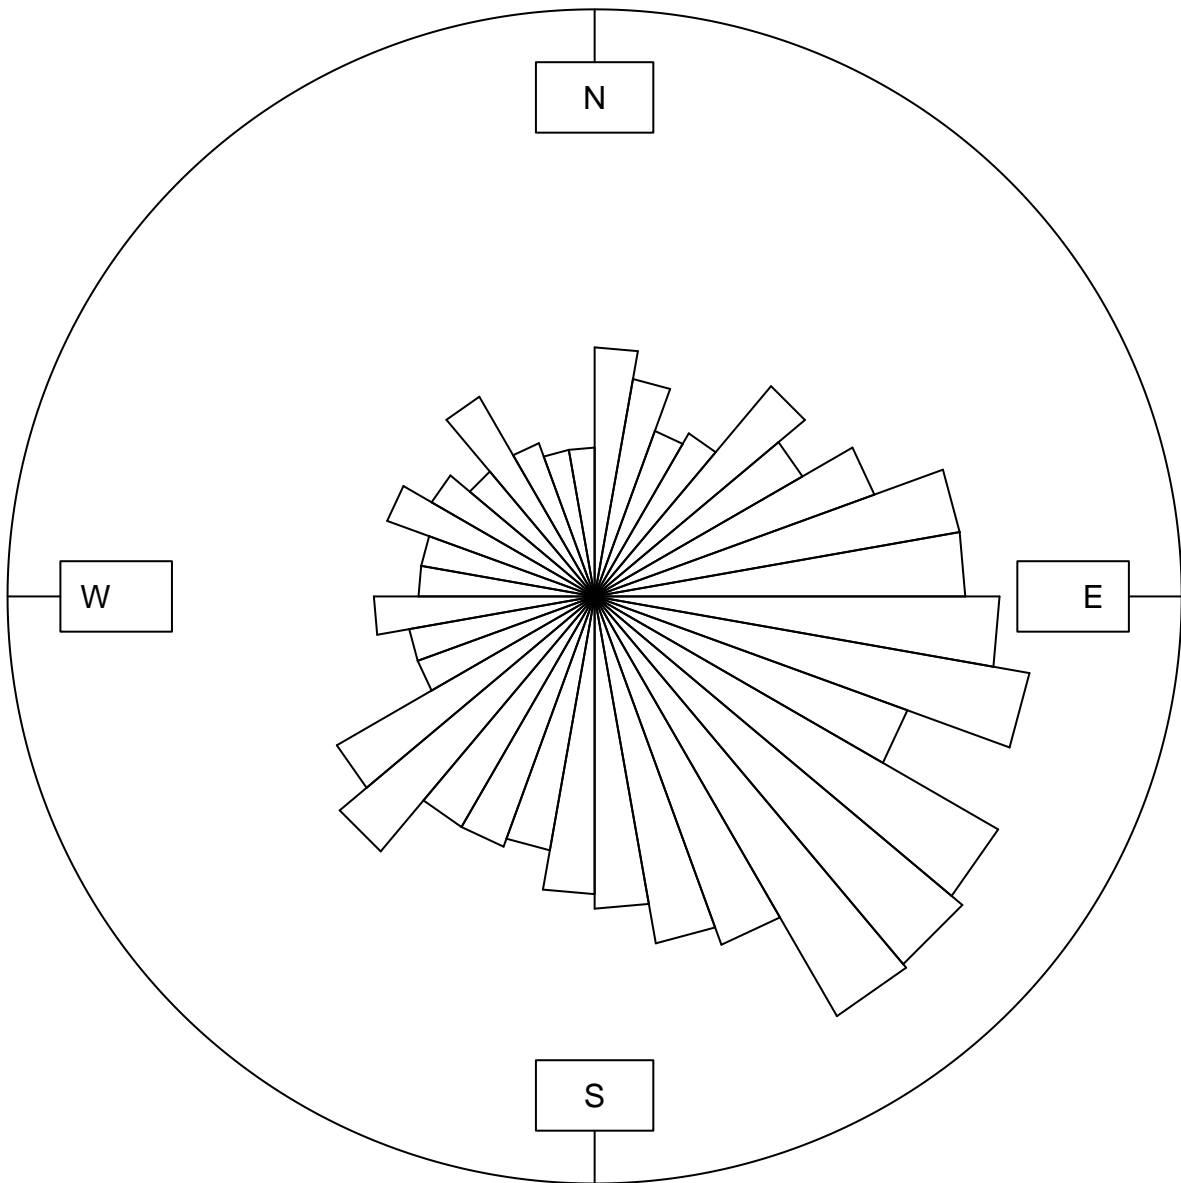

# bootstrap 167

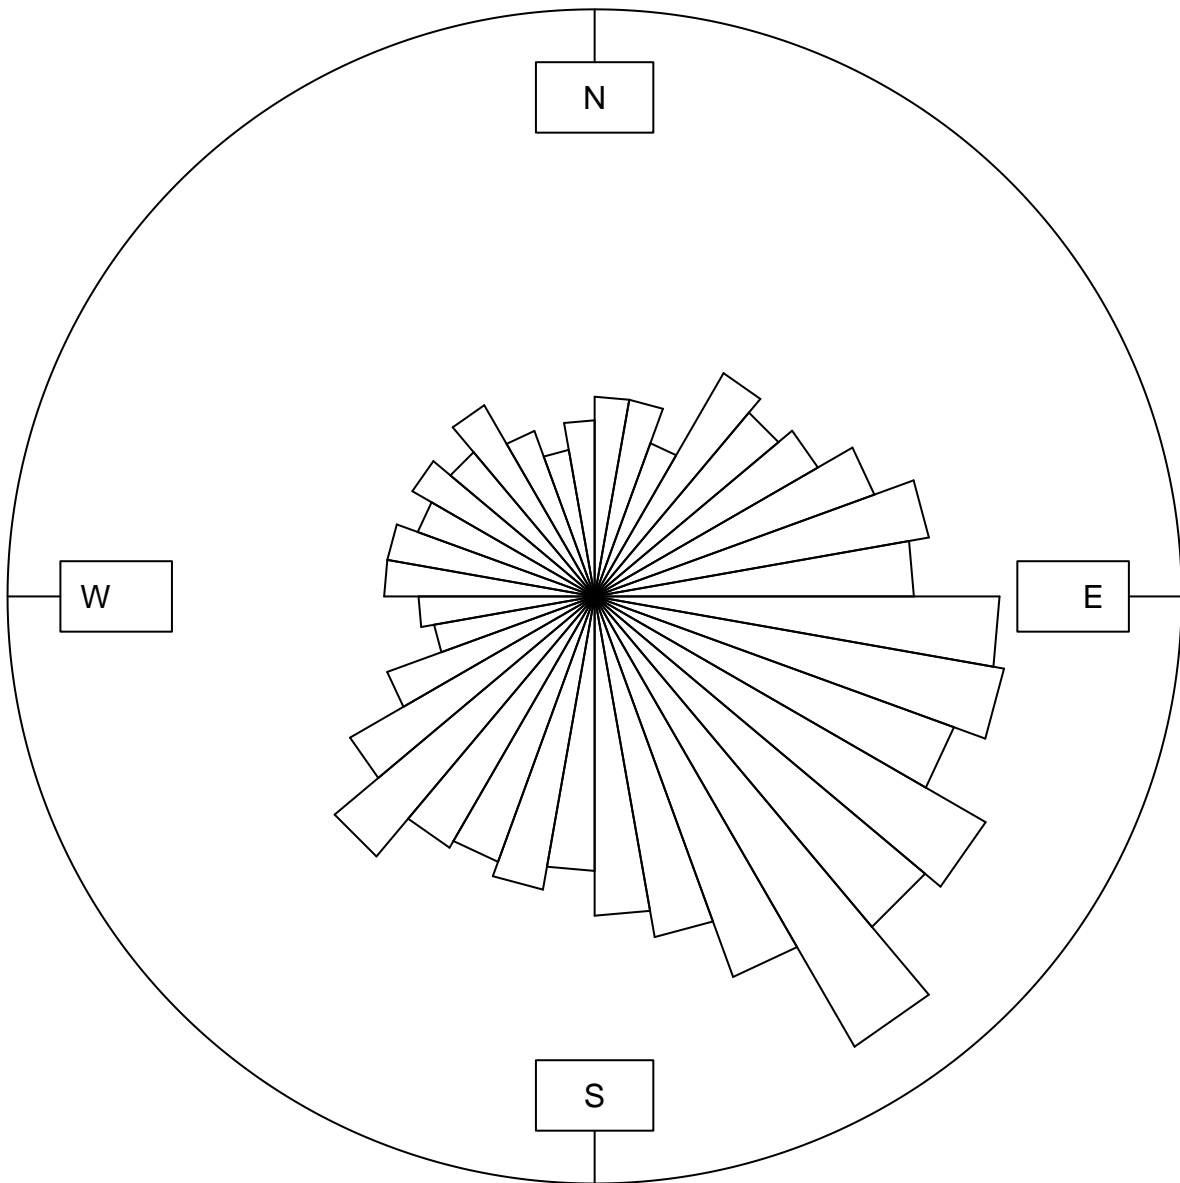

# bootstrap 168

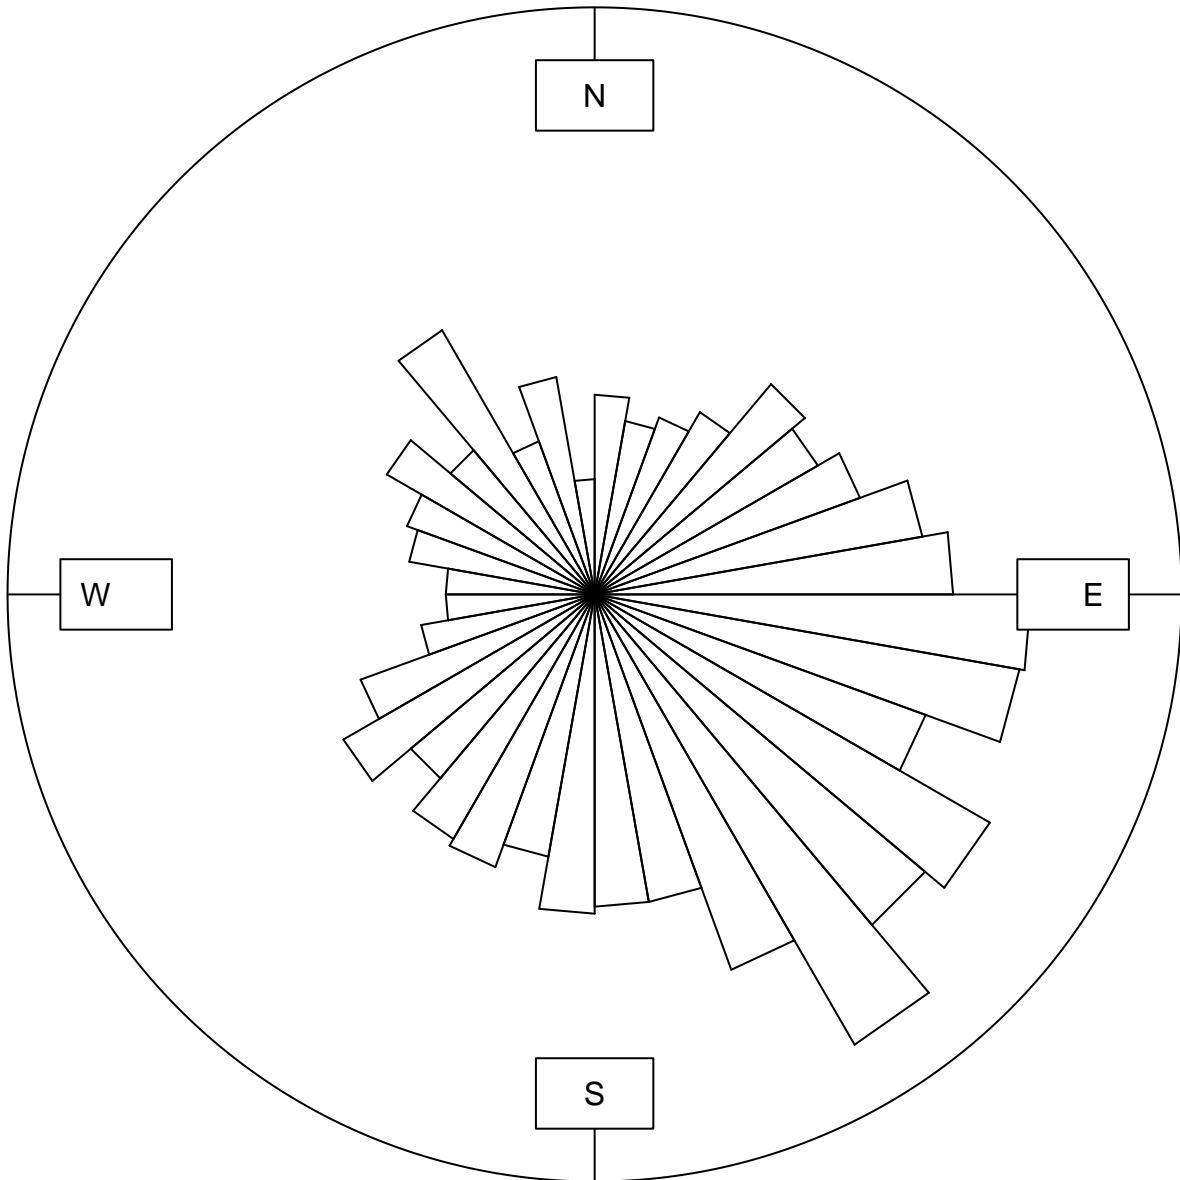



**bootstrap 169**

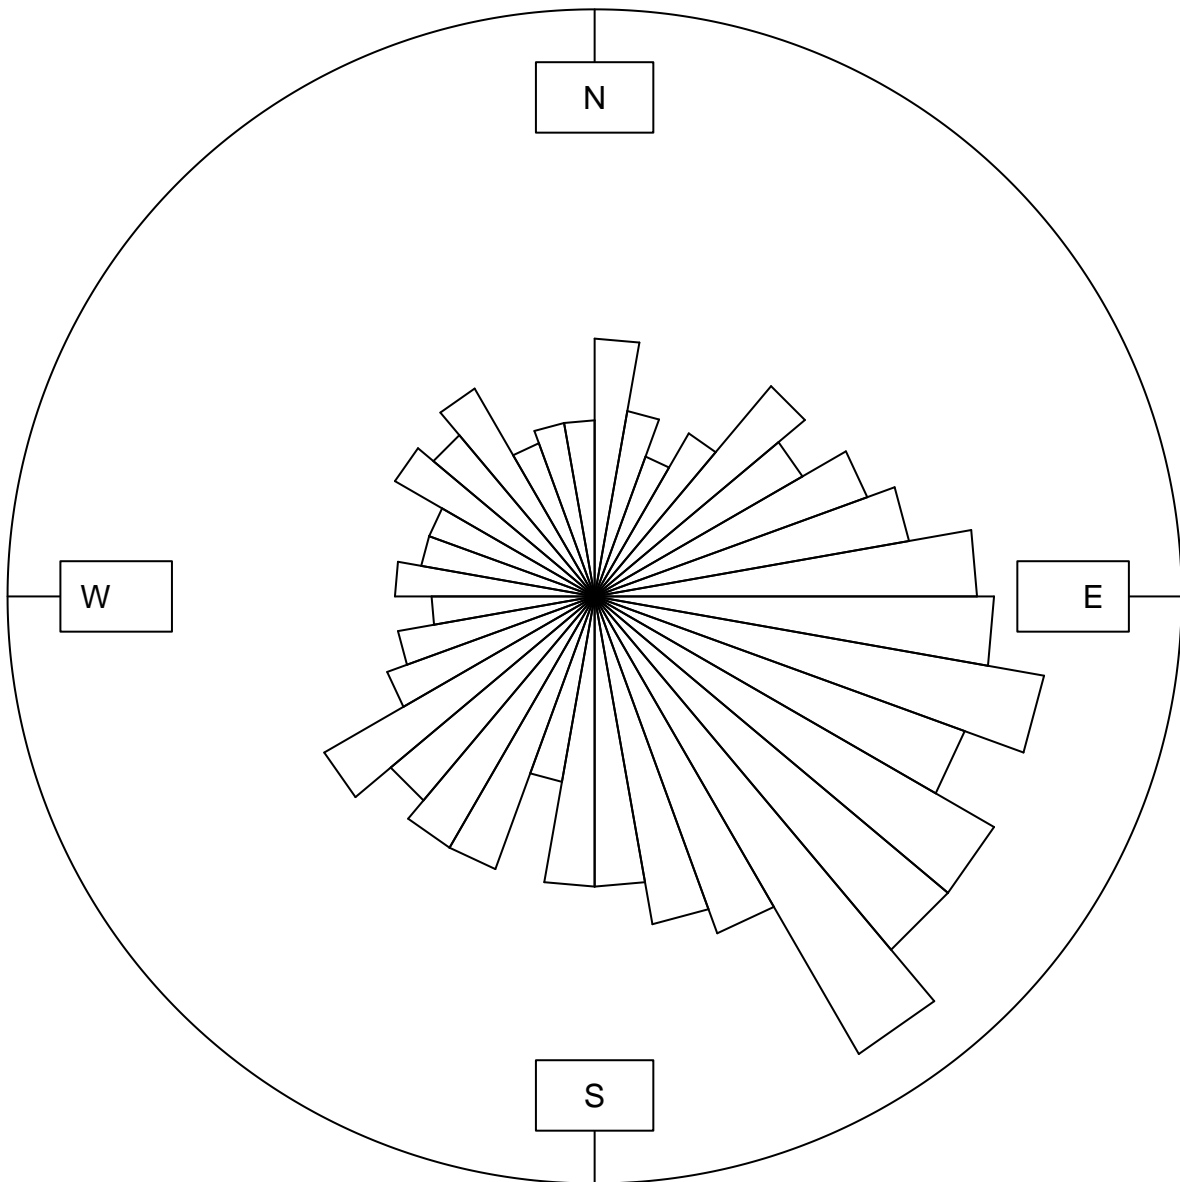

# bootstrap 170

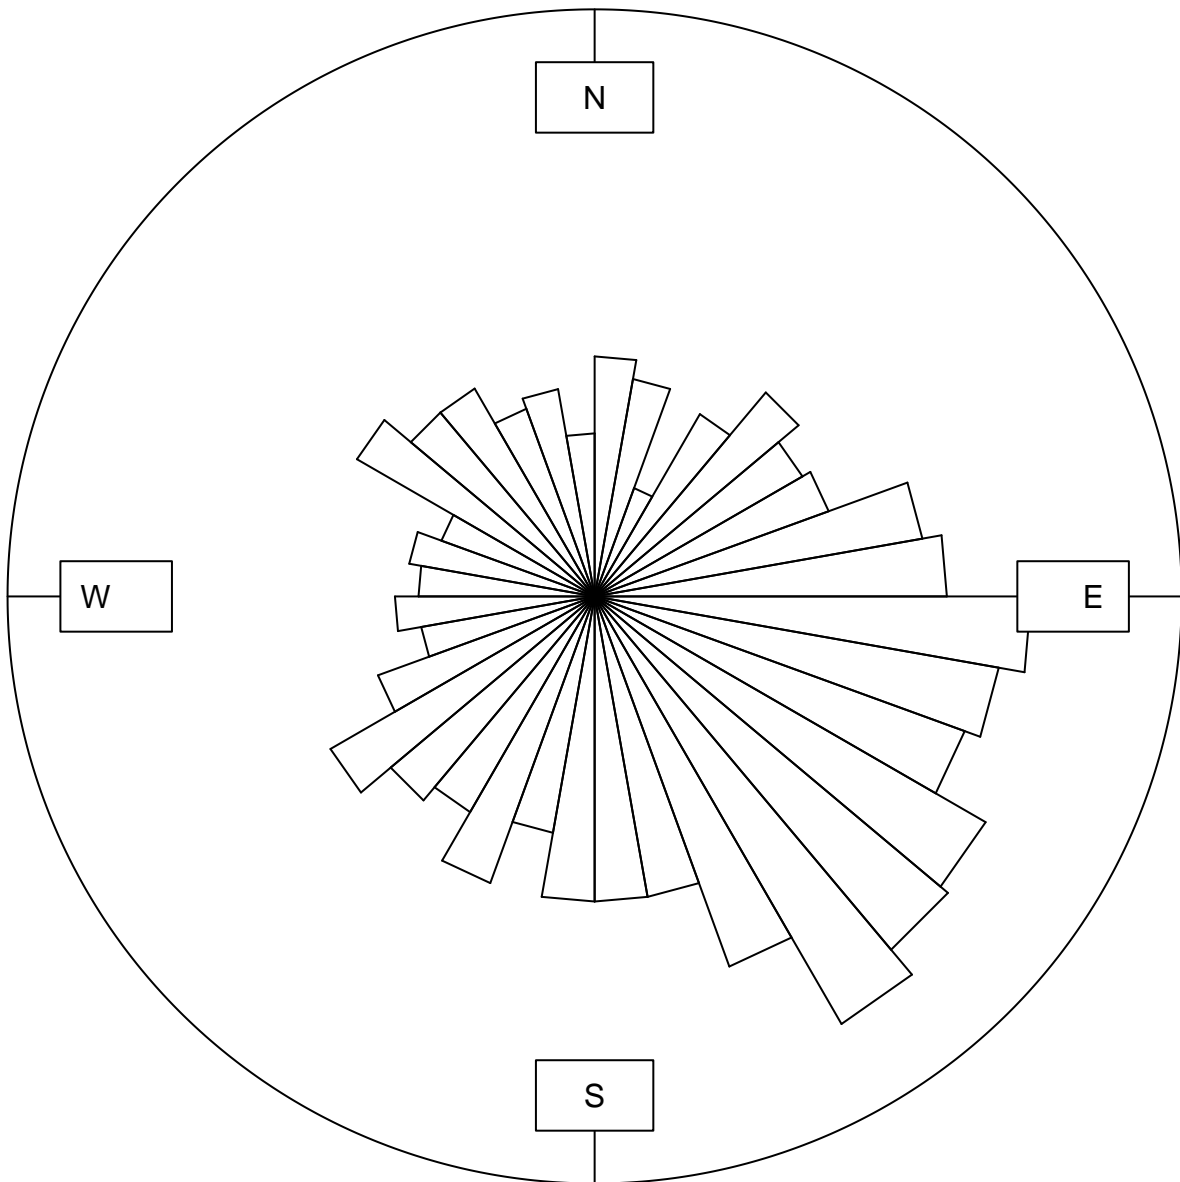

**bootstrap 171**

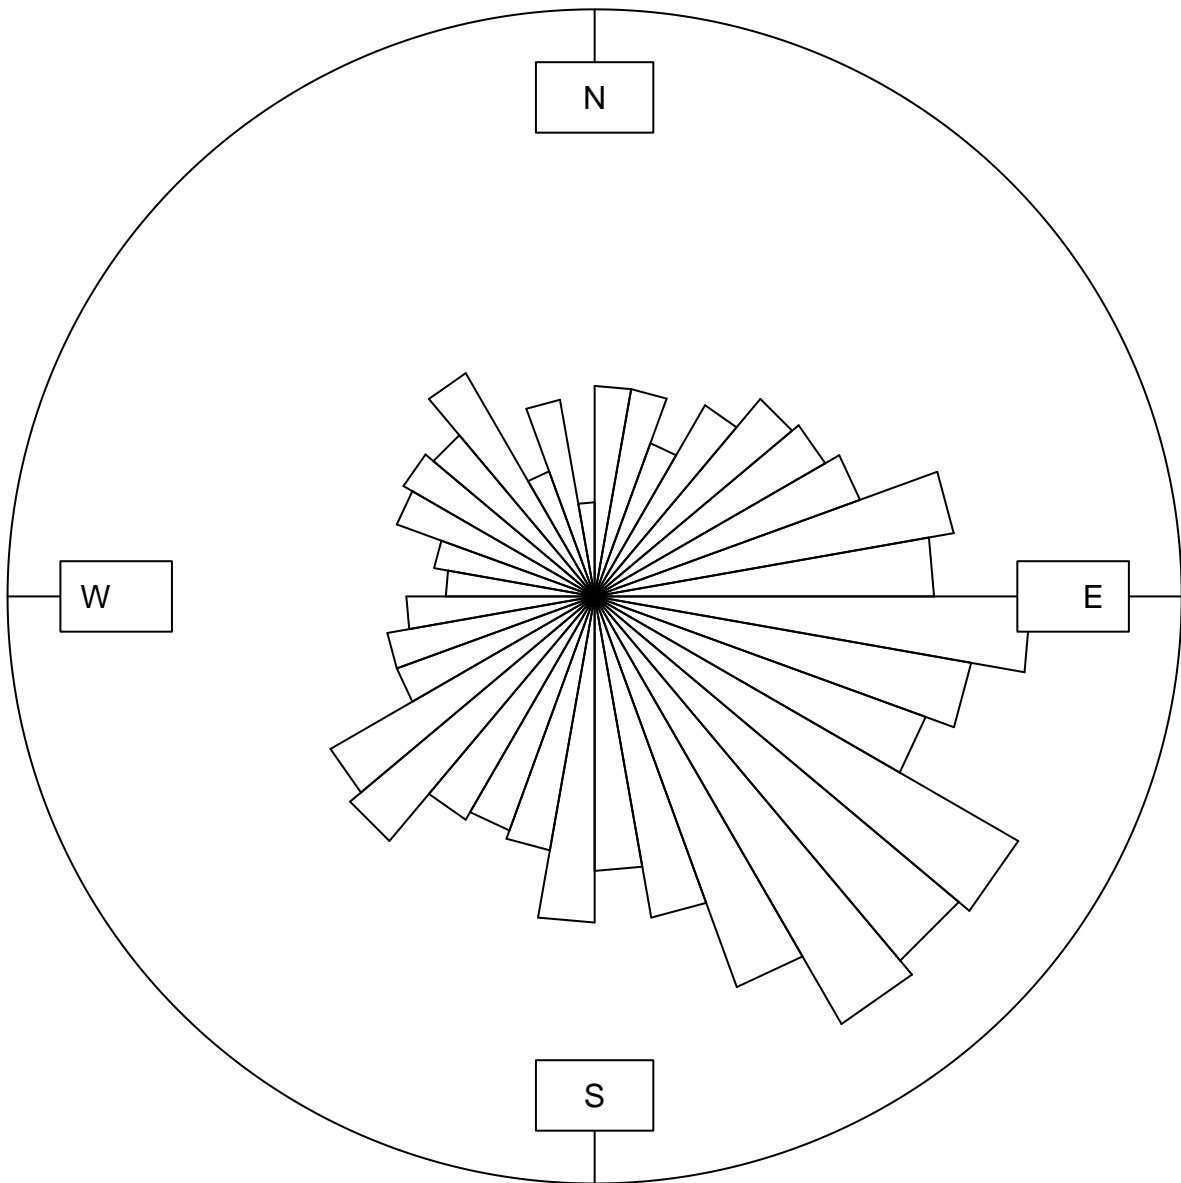

# bootstrap 172

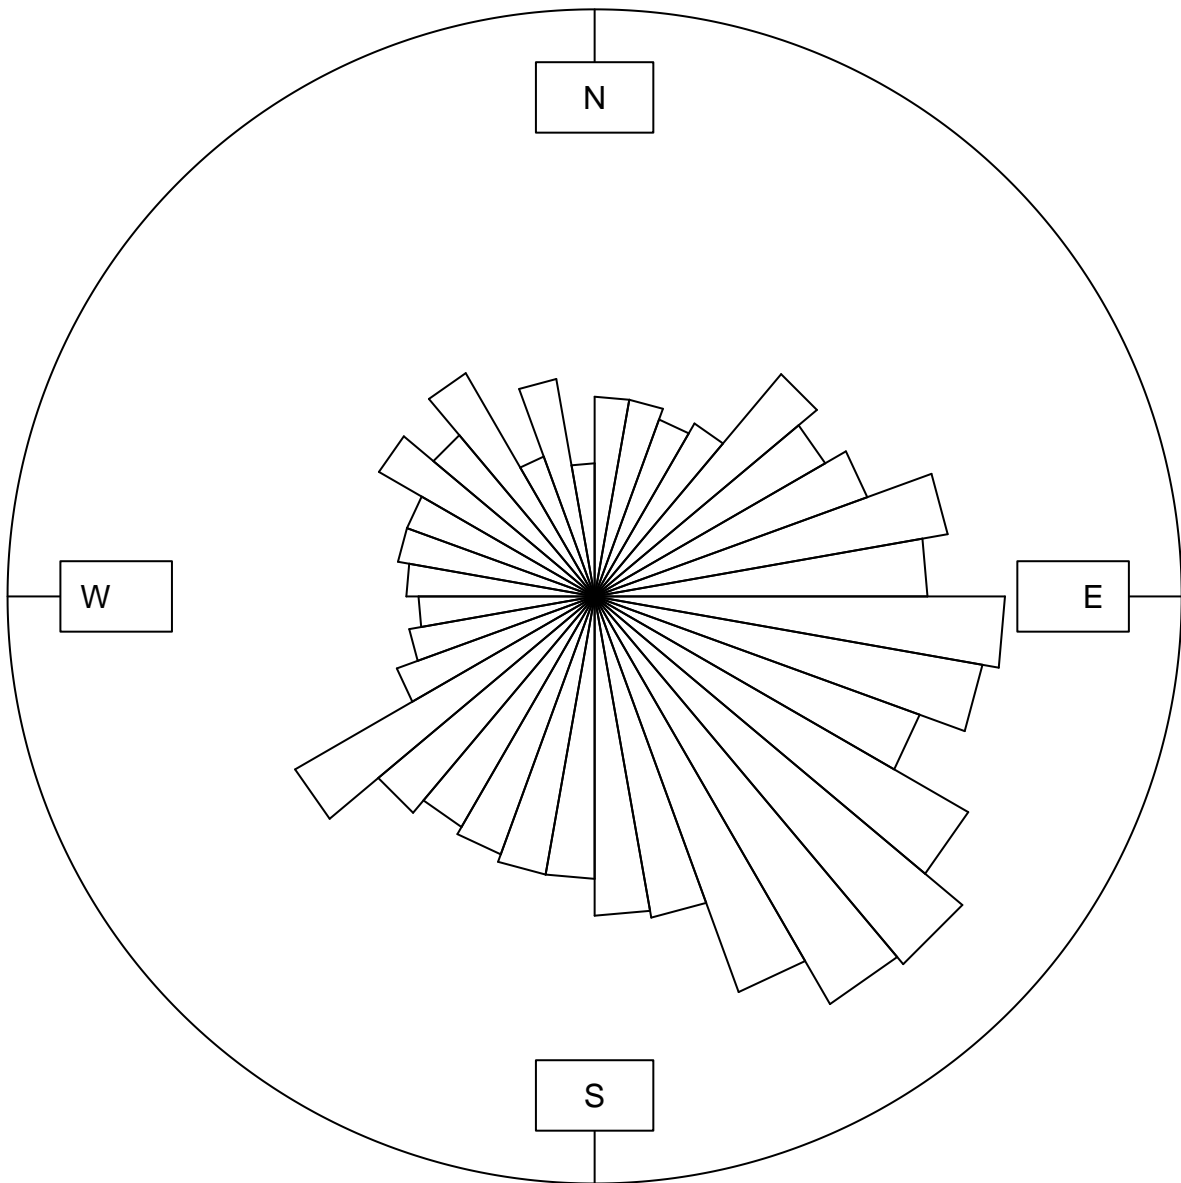

# bootstrap 173

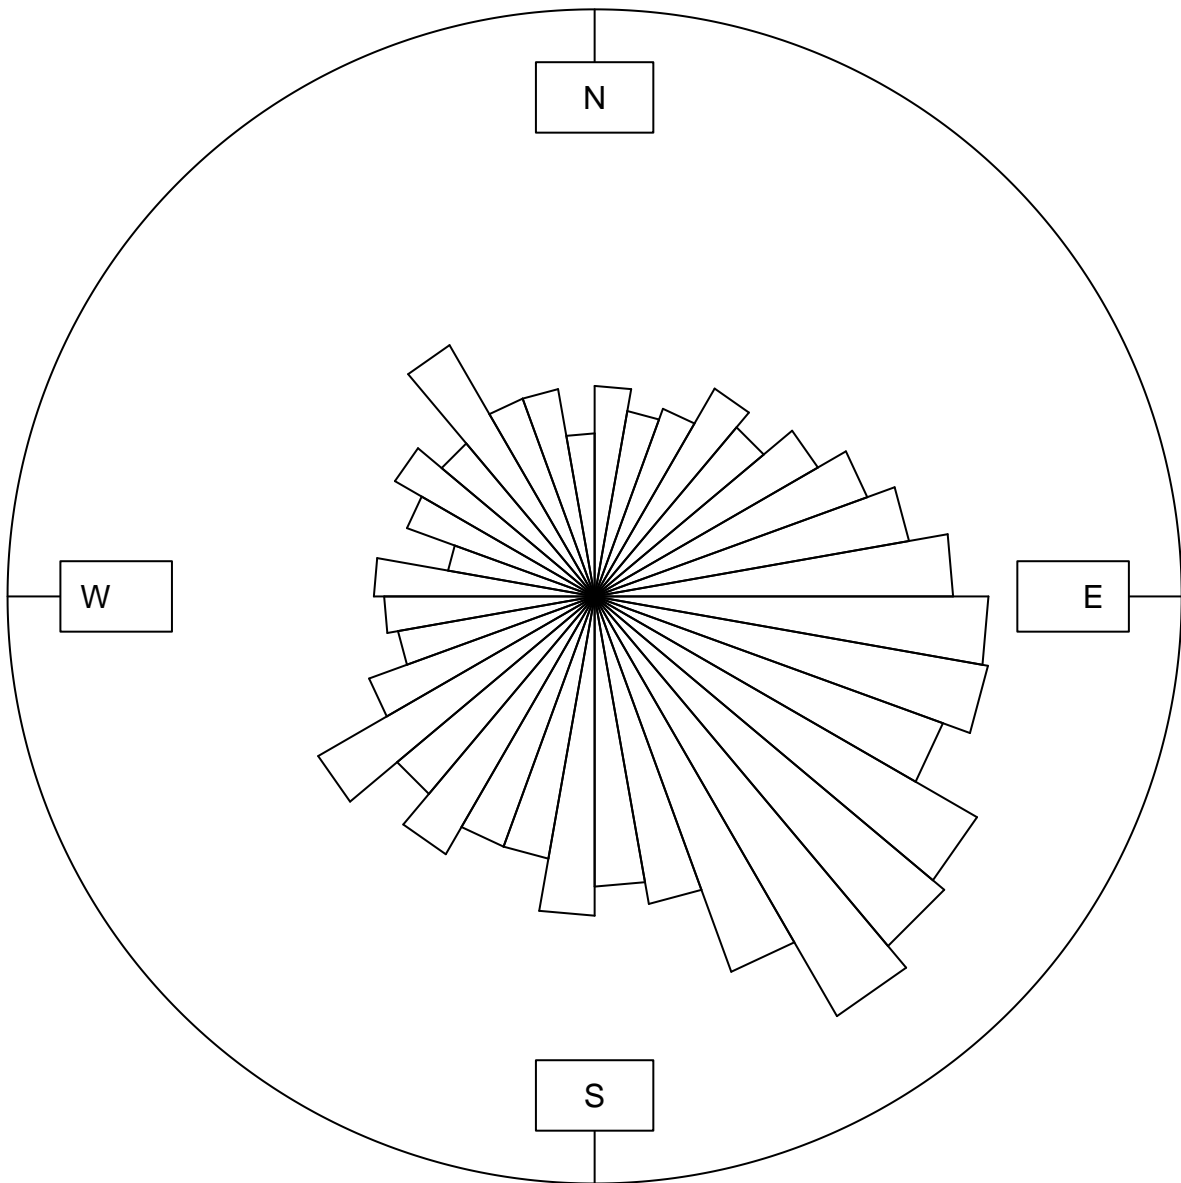

# bootstrap 174

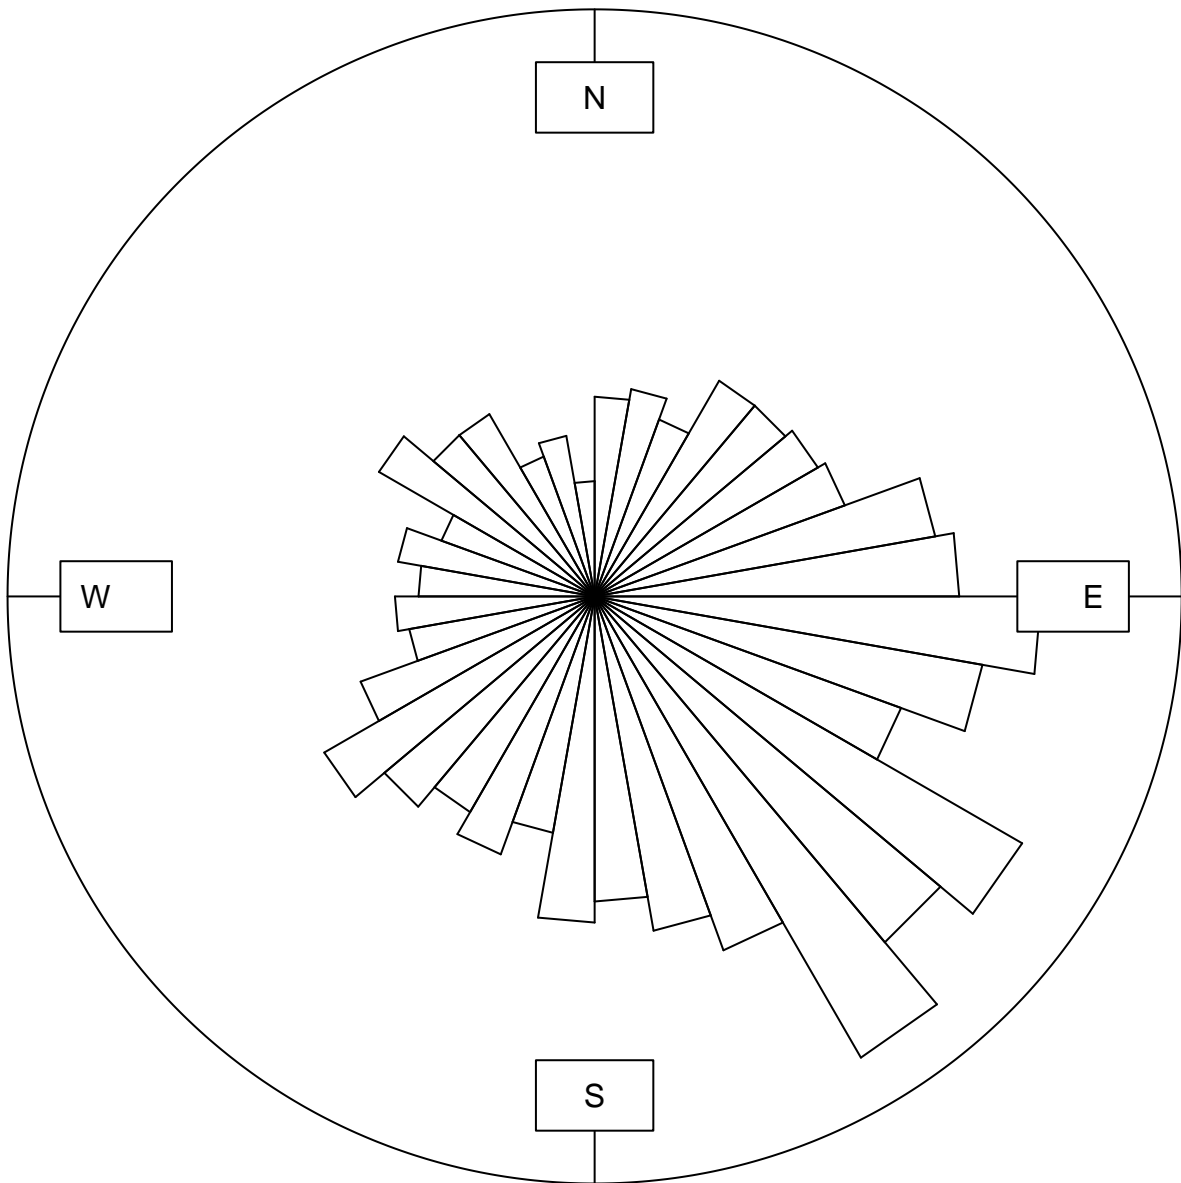

# bootstrap 175

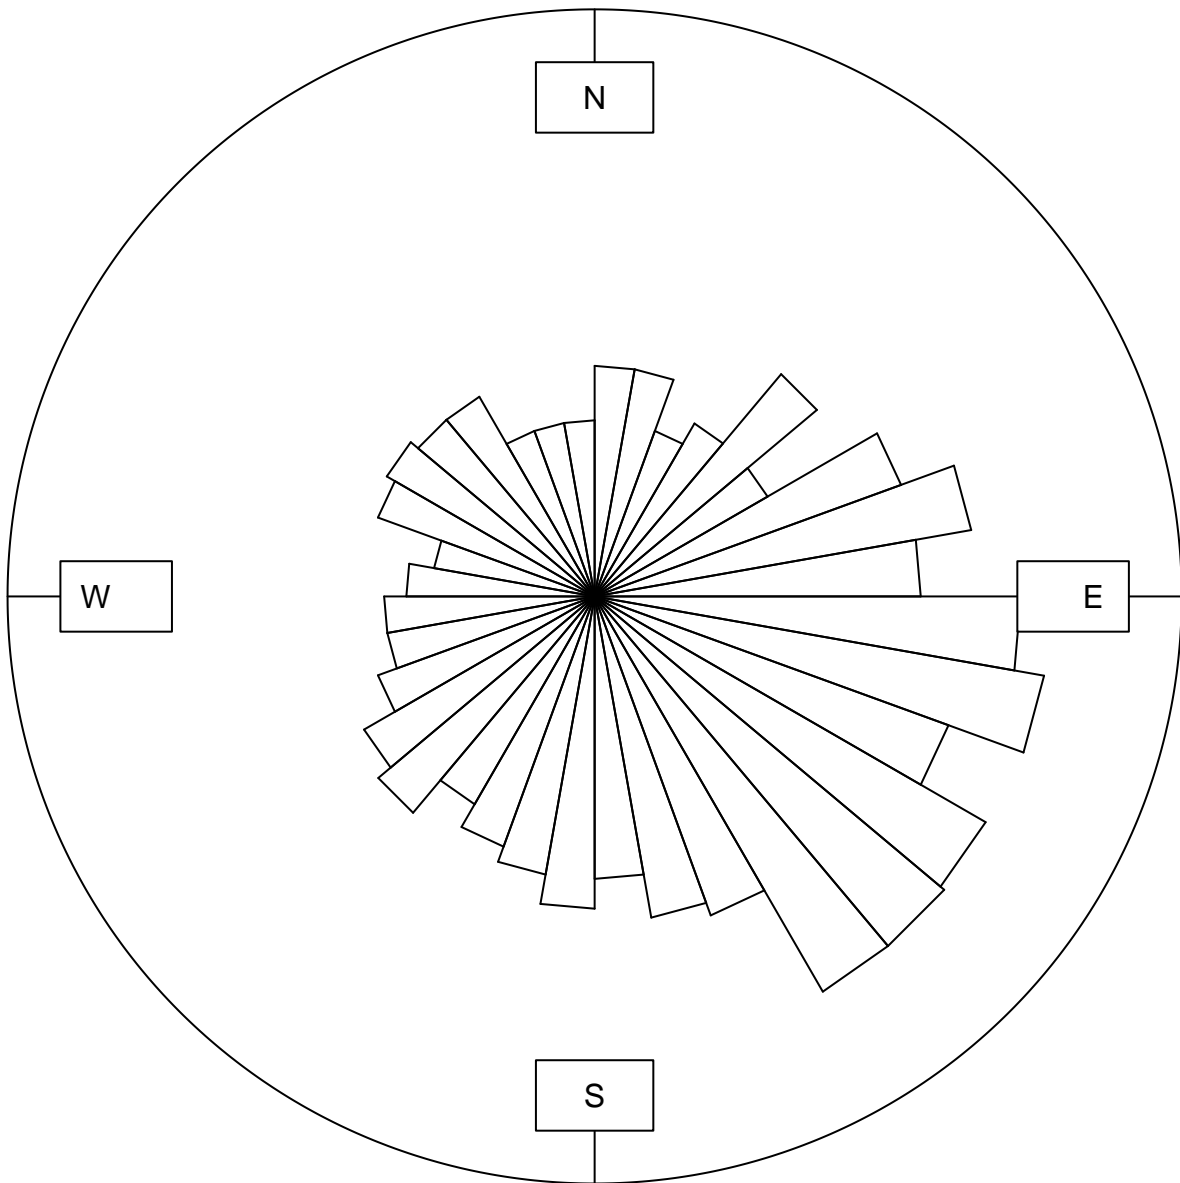

# bootstrap 176

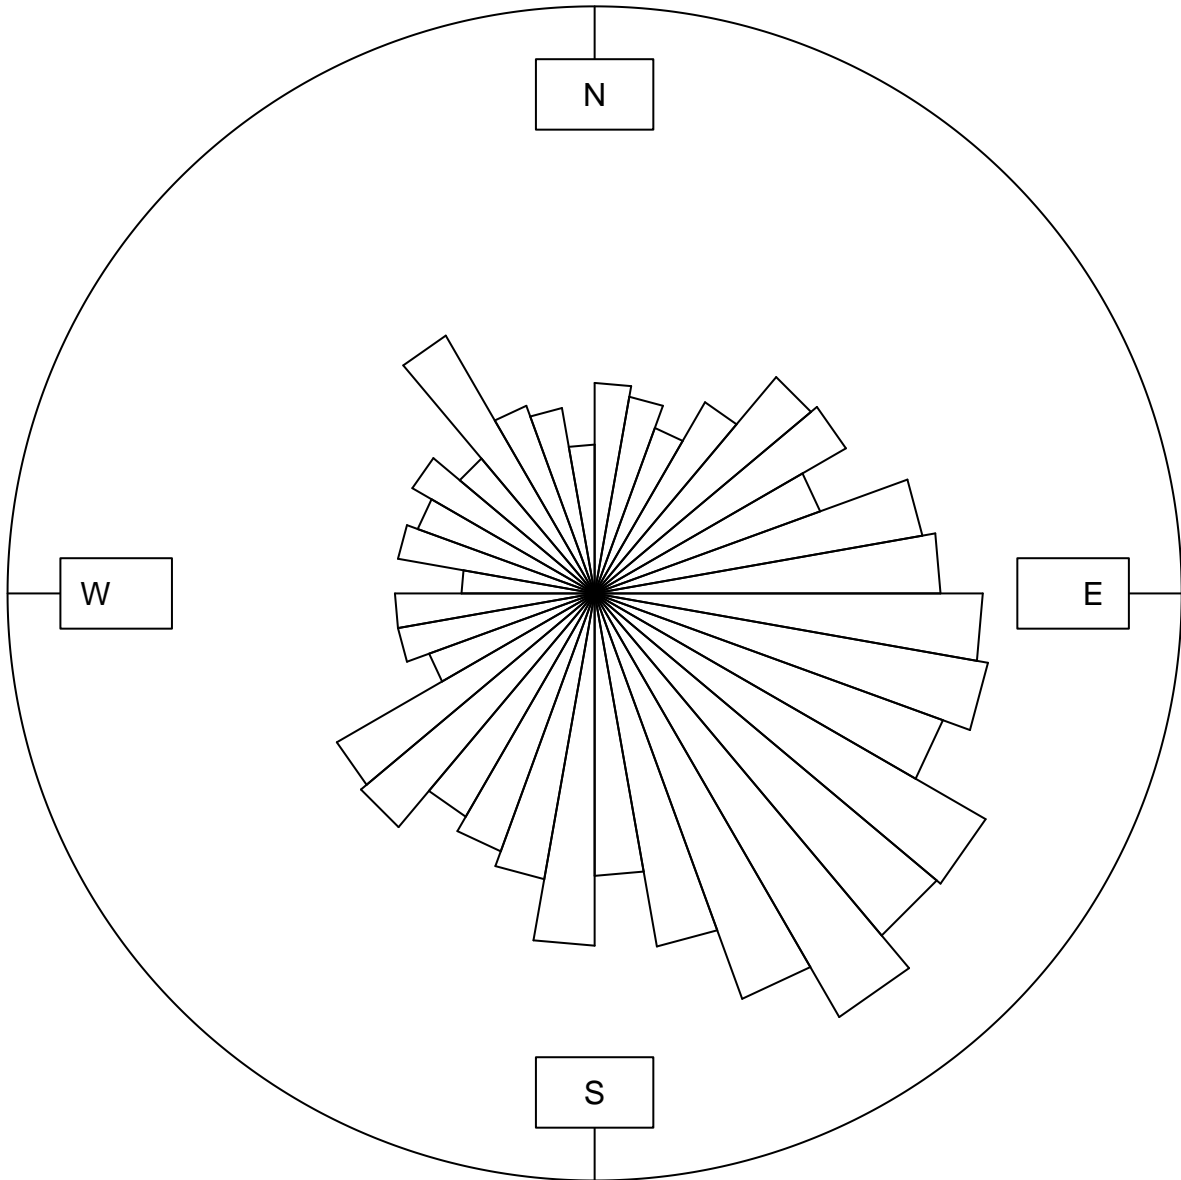



# bootstrap 177

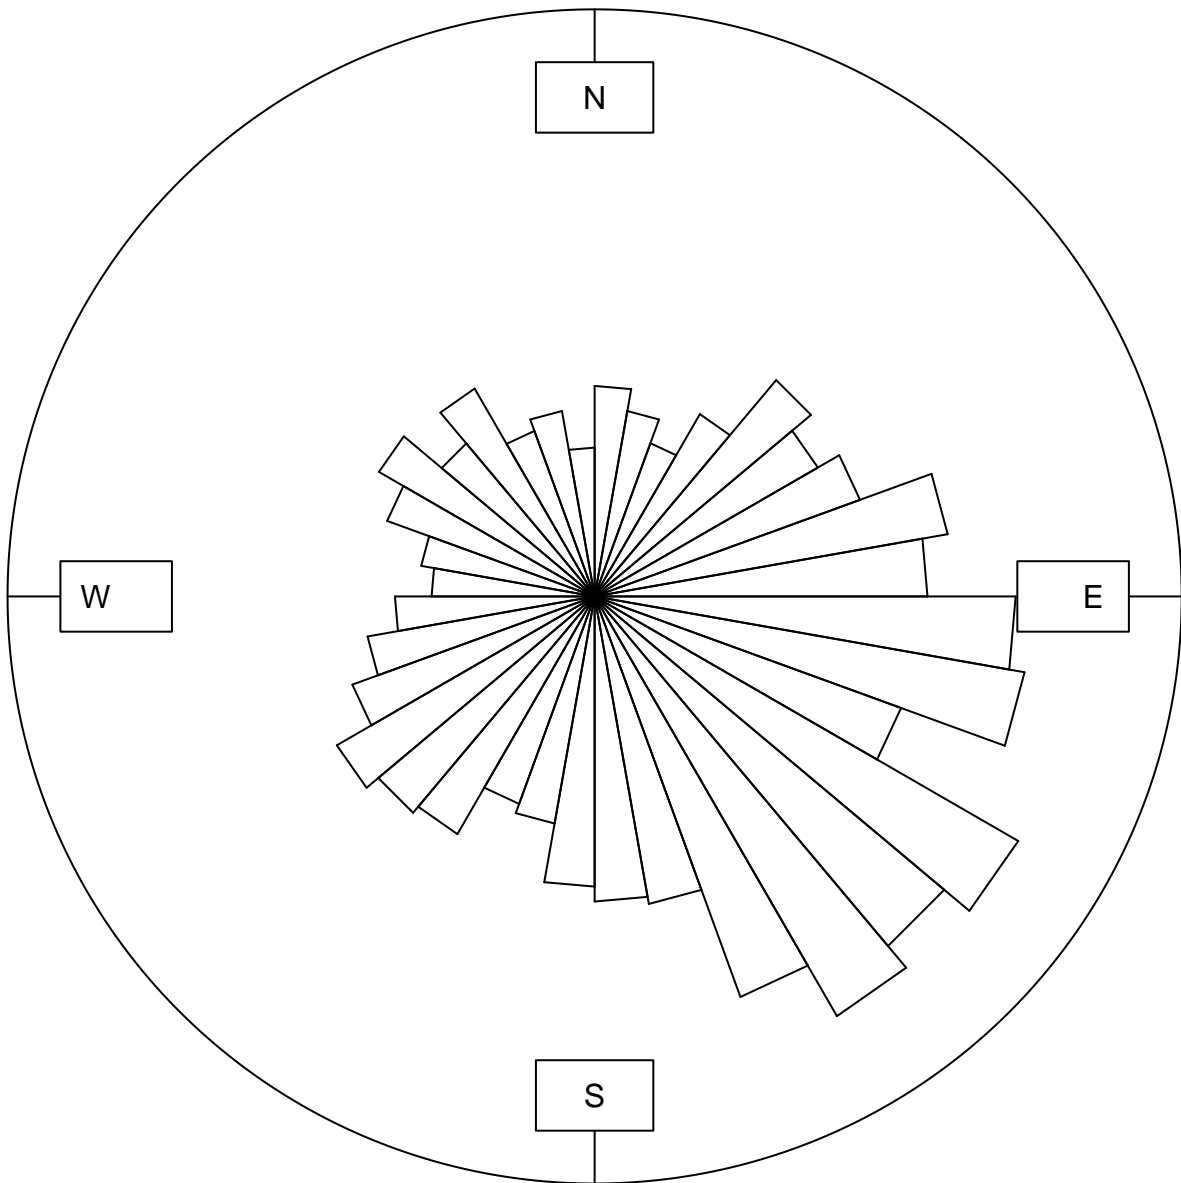

# bootstrap 178

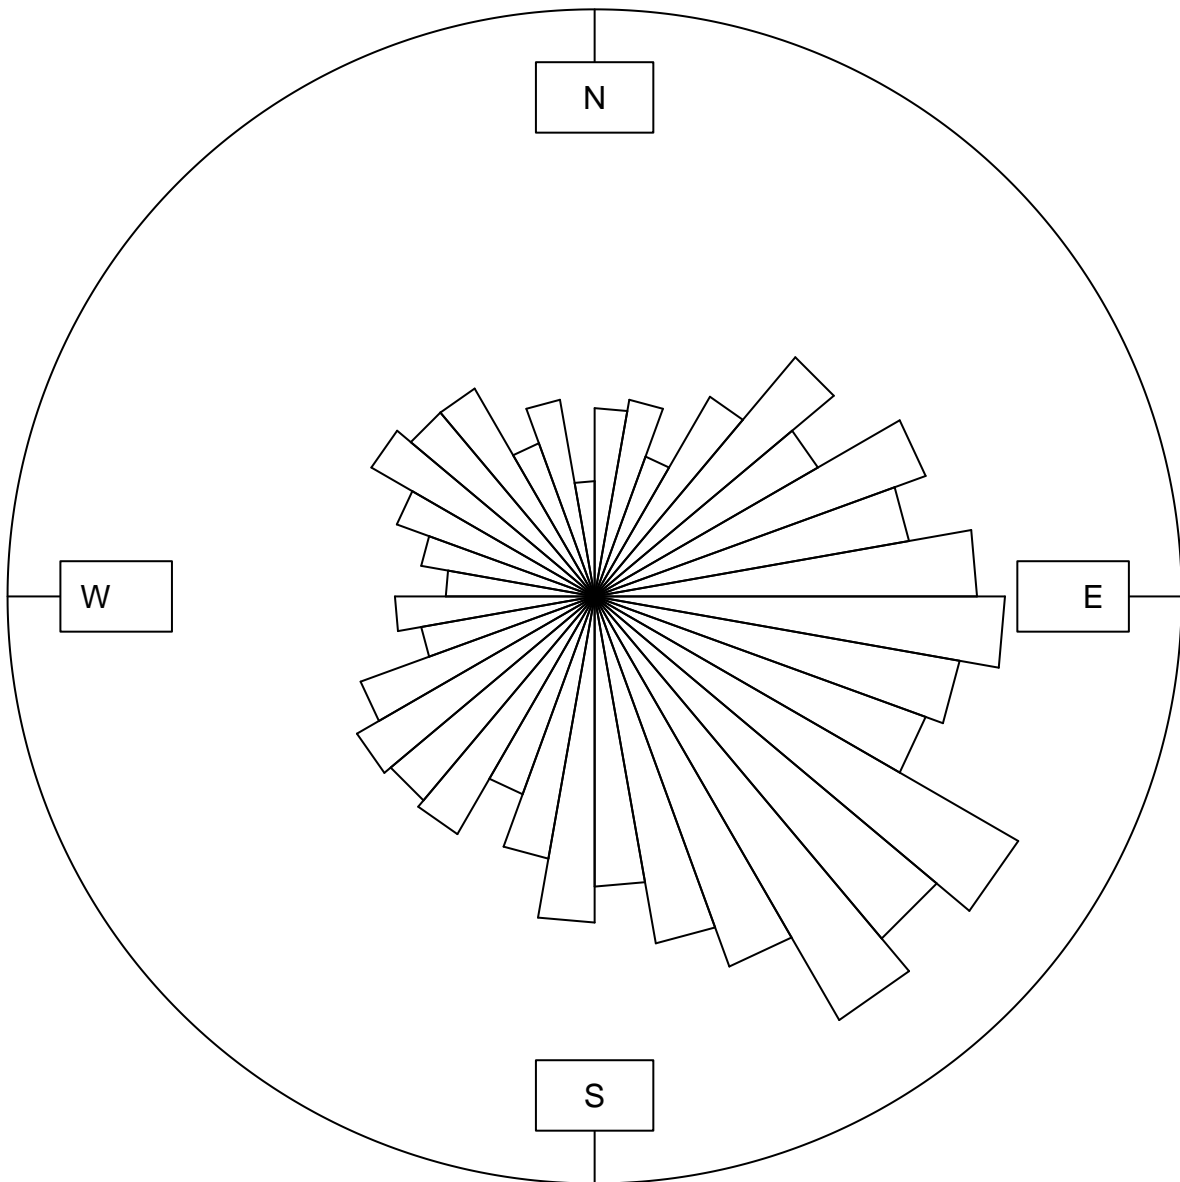

# bootstrap 179

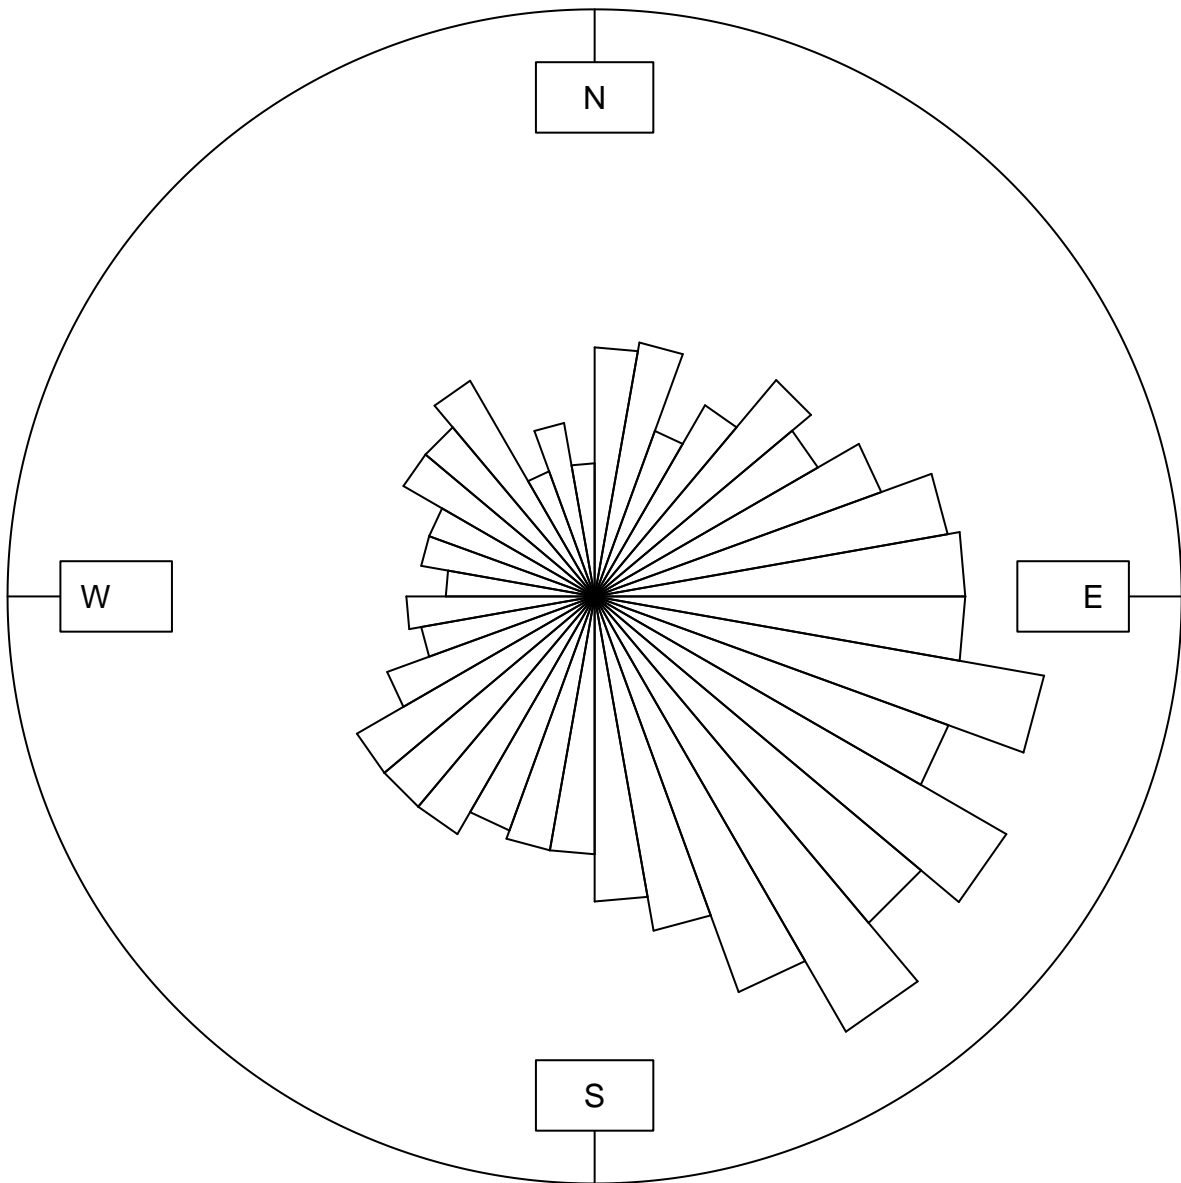

# bootstrap 180

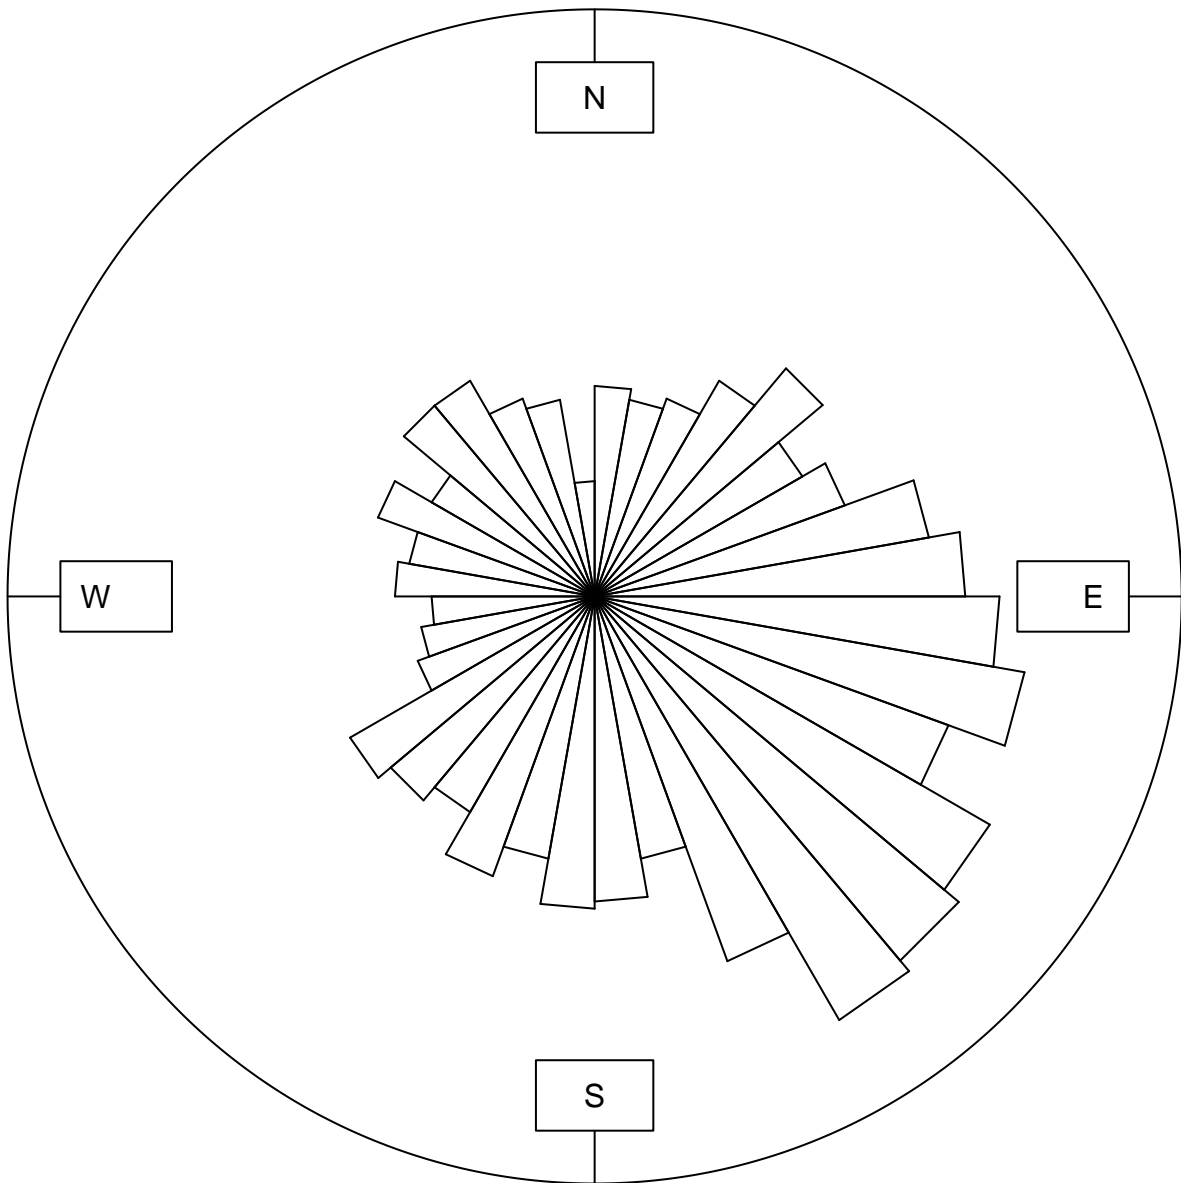

# bootstrap 181

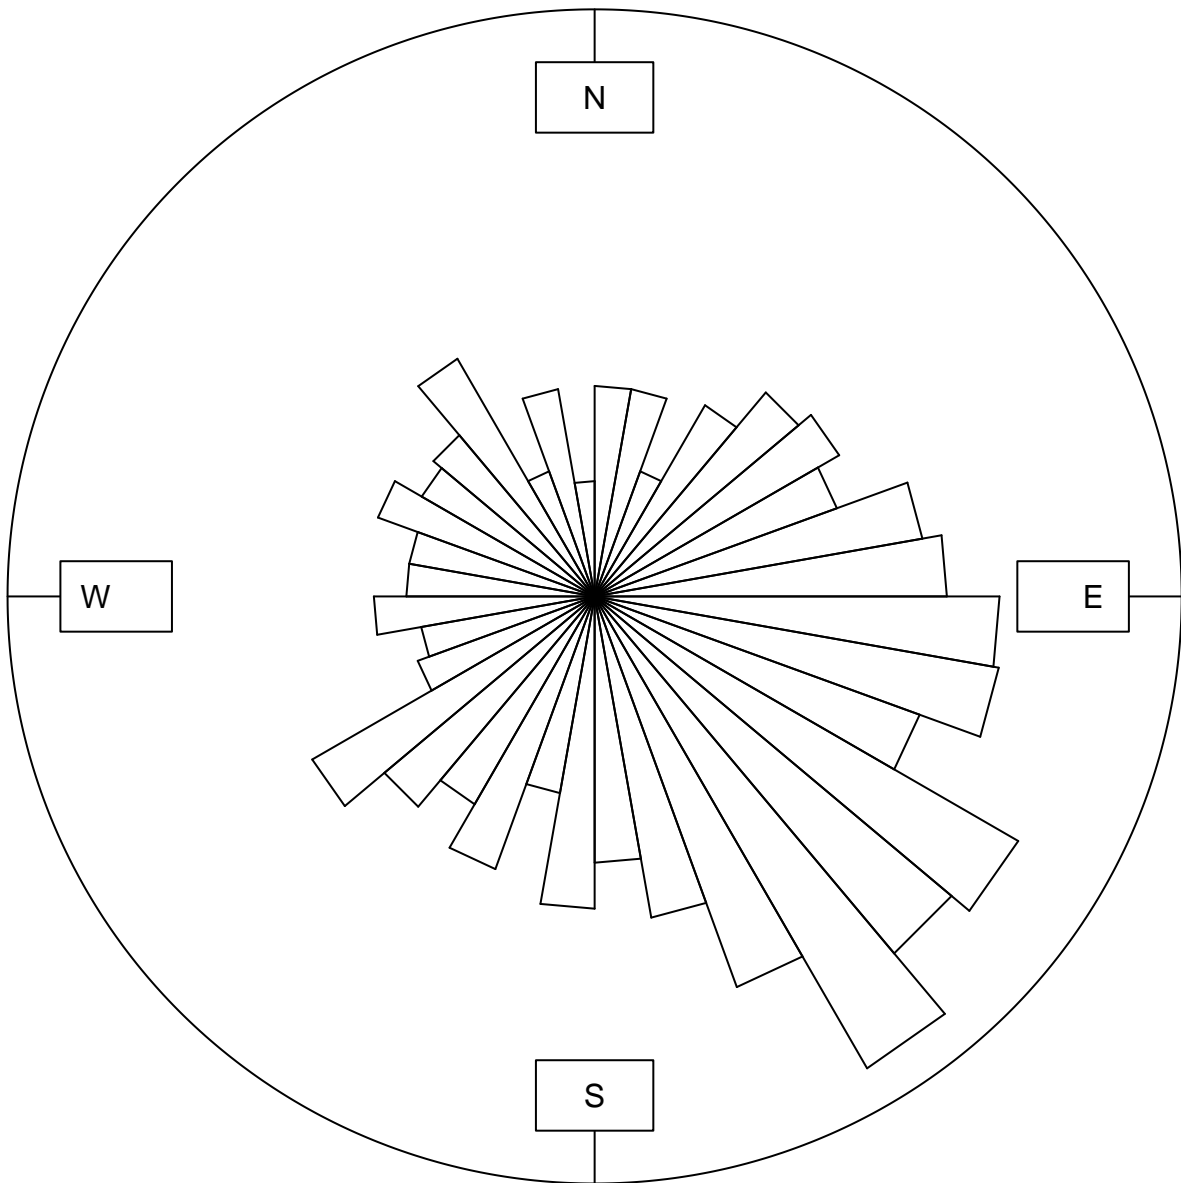

# bootstrap 182

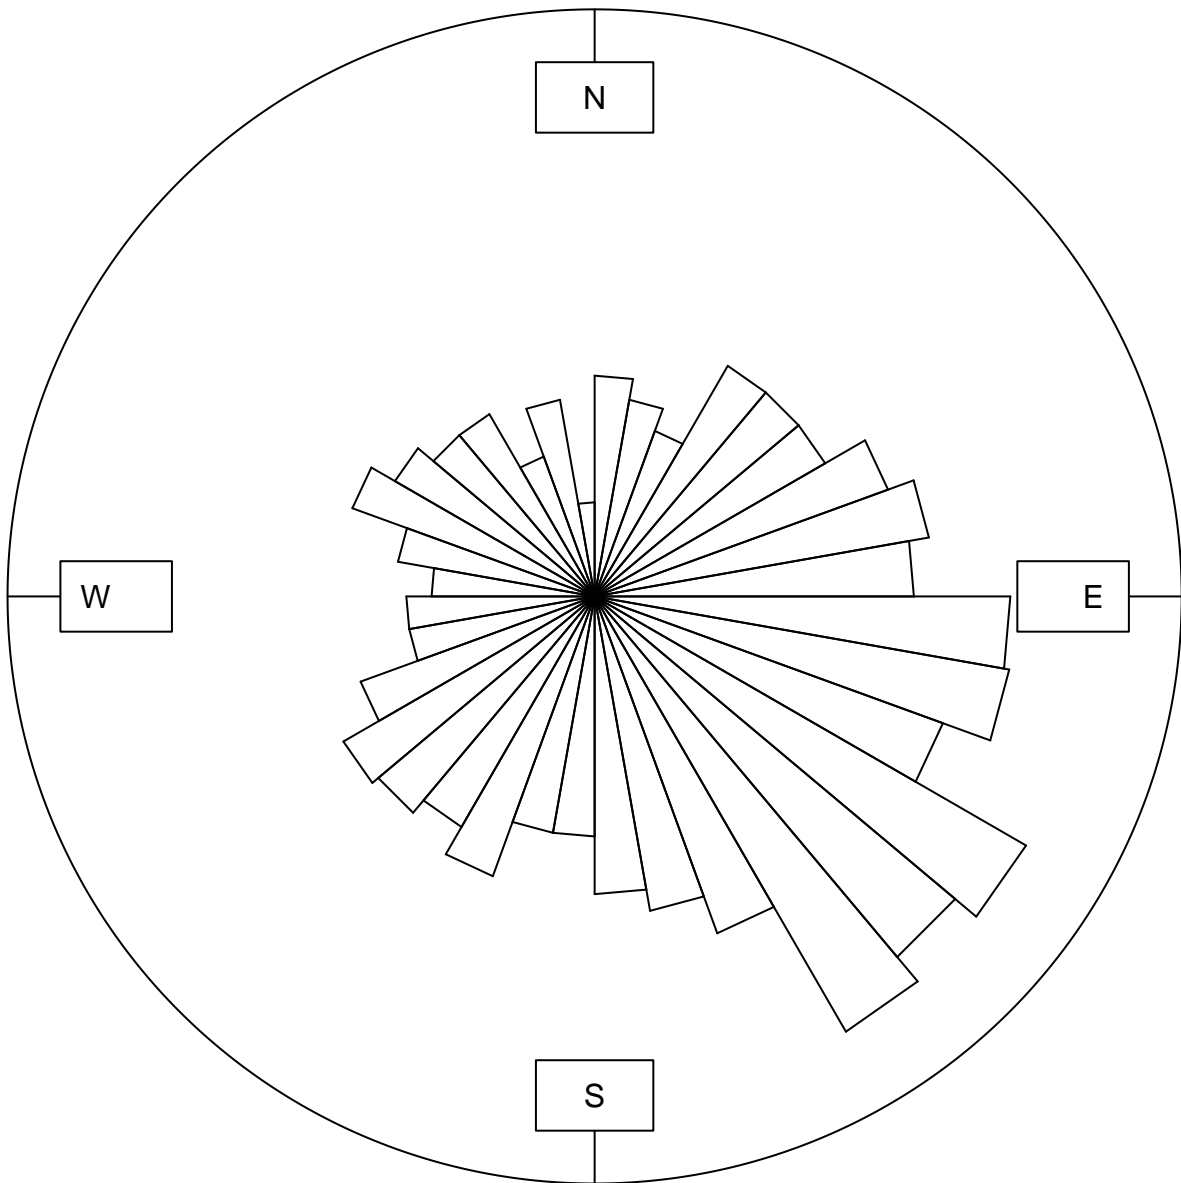

# bootstrap 183

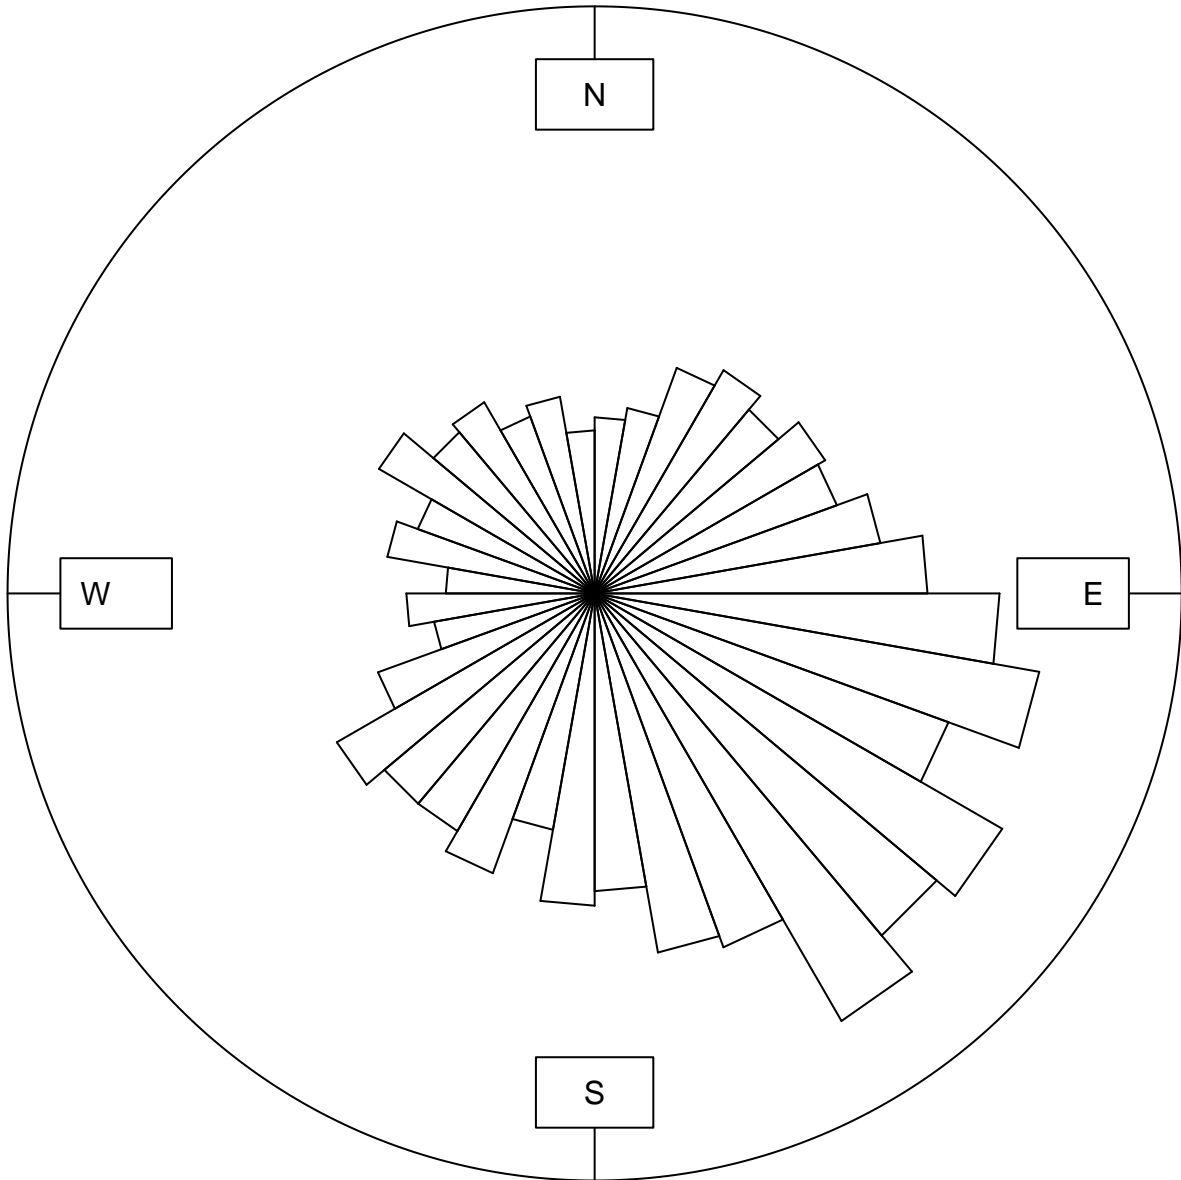

# bootstrap 184

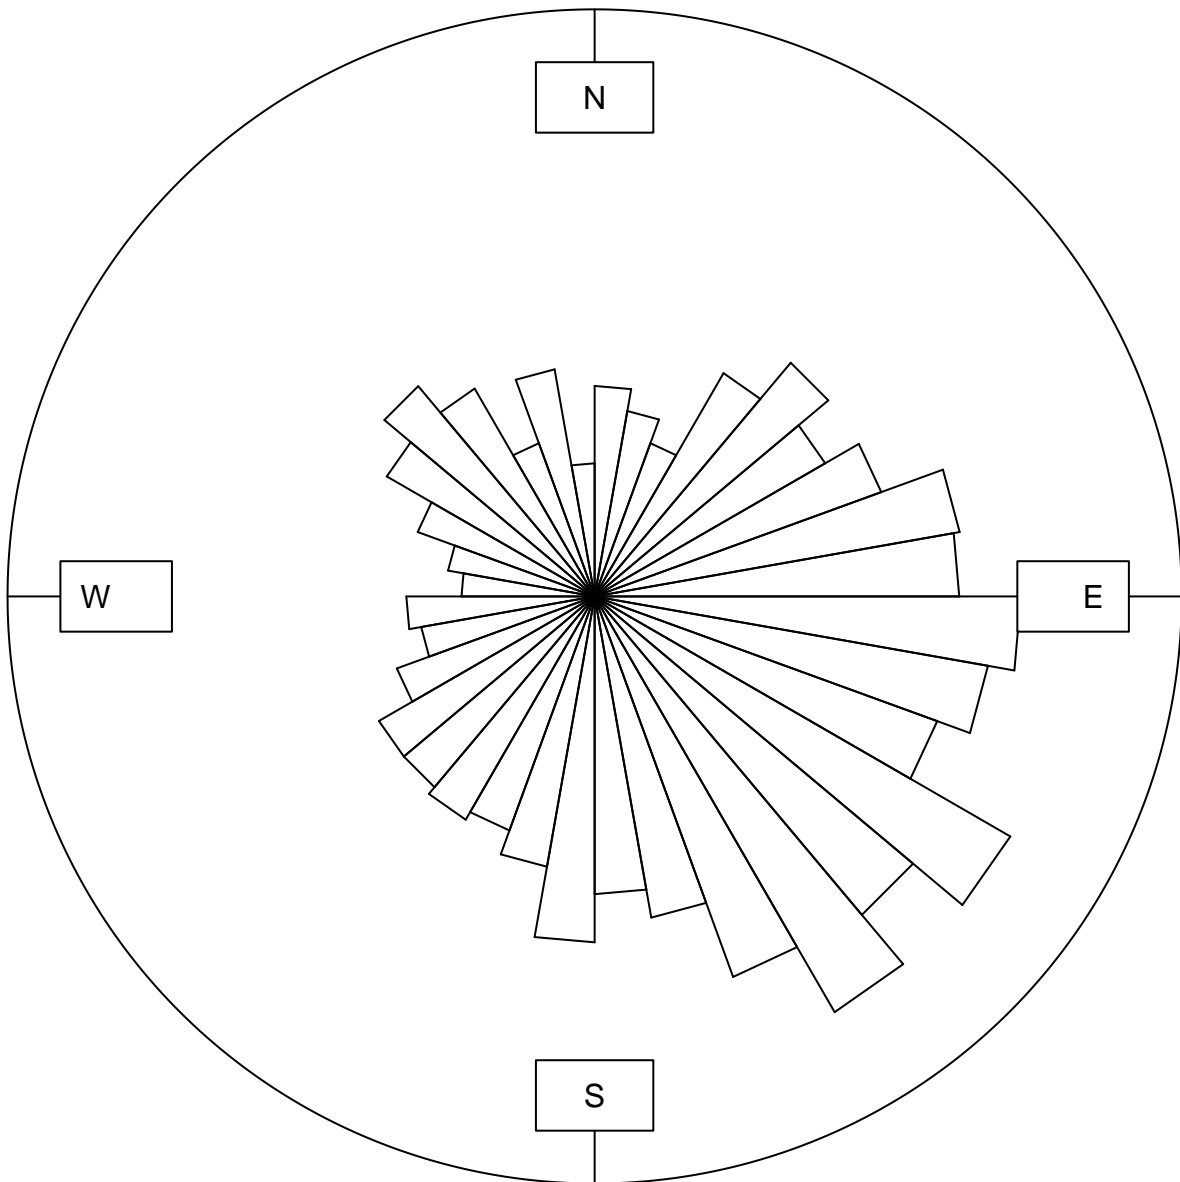



# bootstrap 185

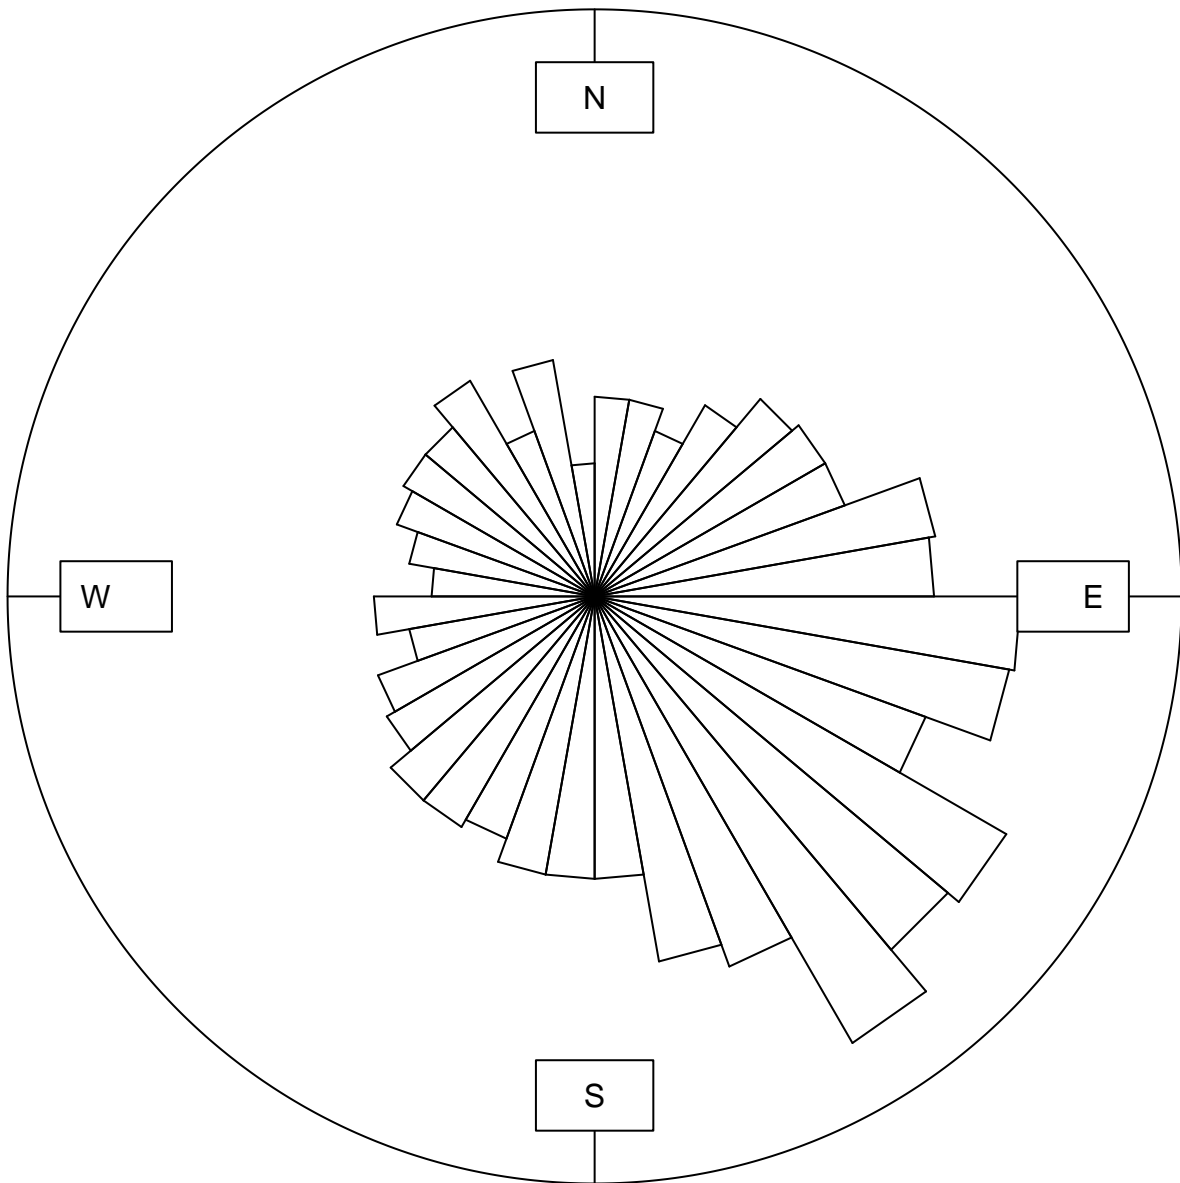

# bootstrap 186

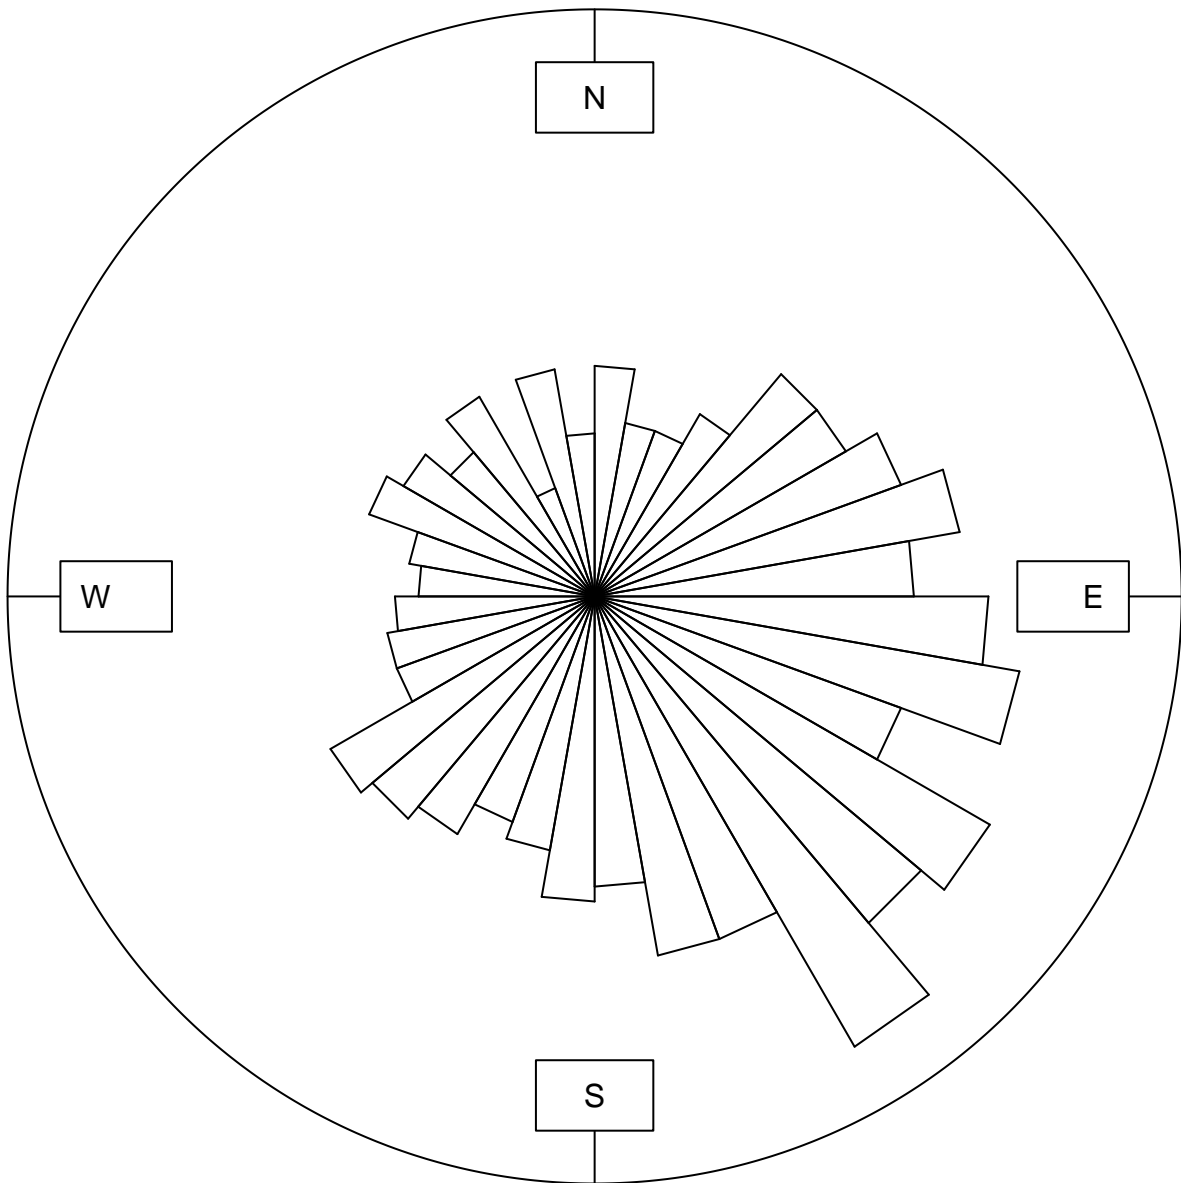

**bootstrap 187**

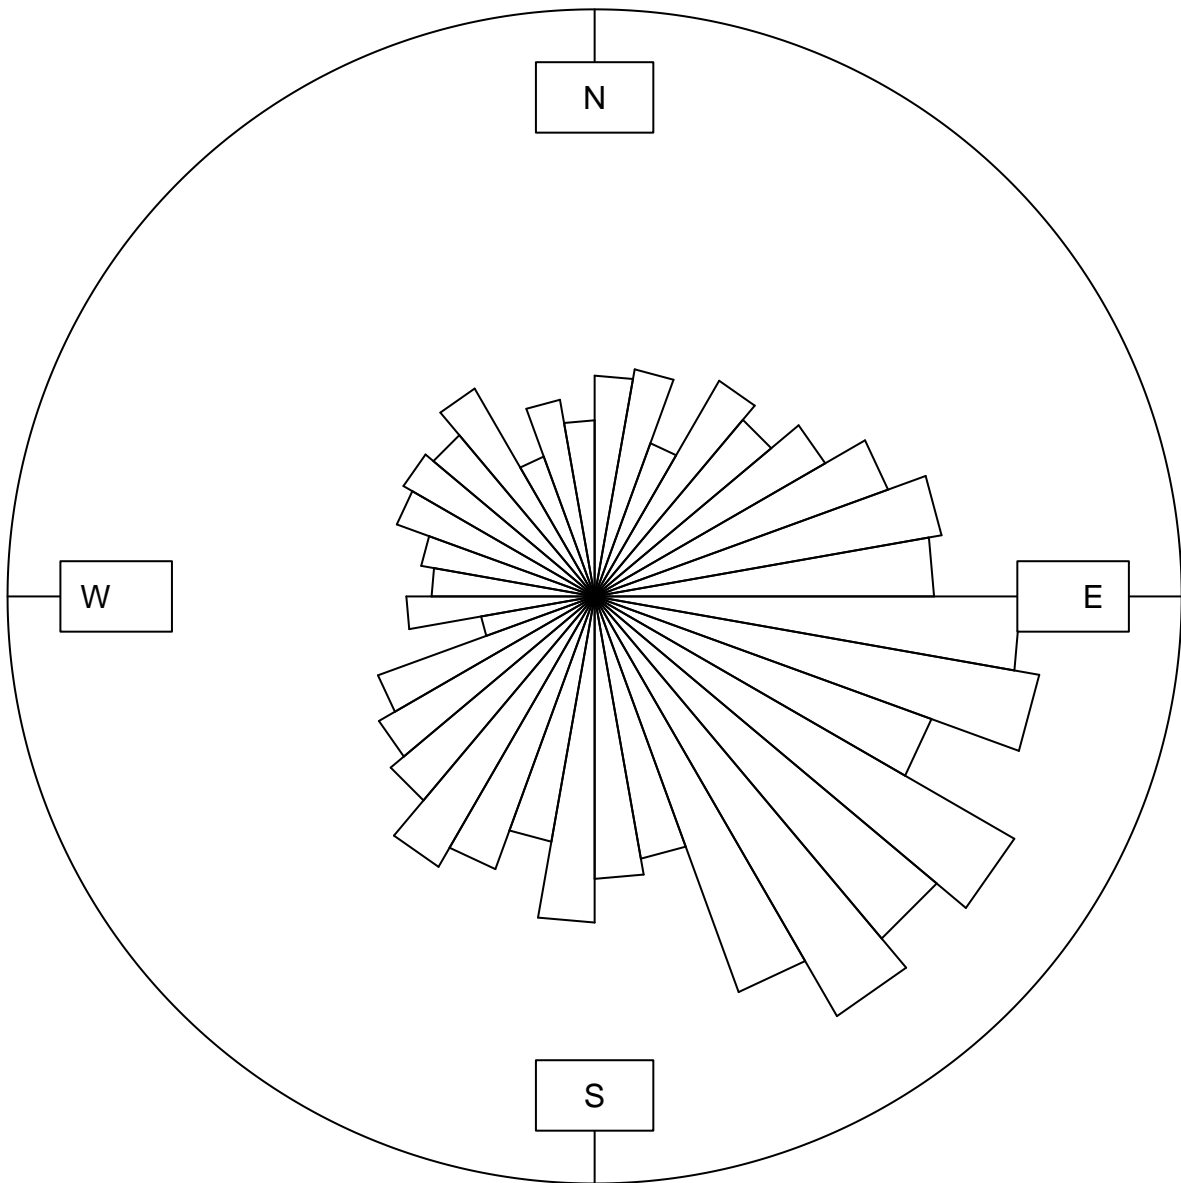

# bootstrap 188

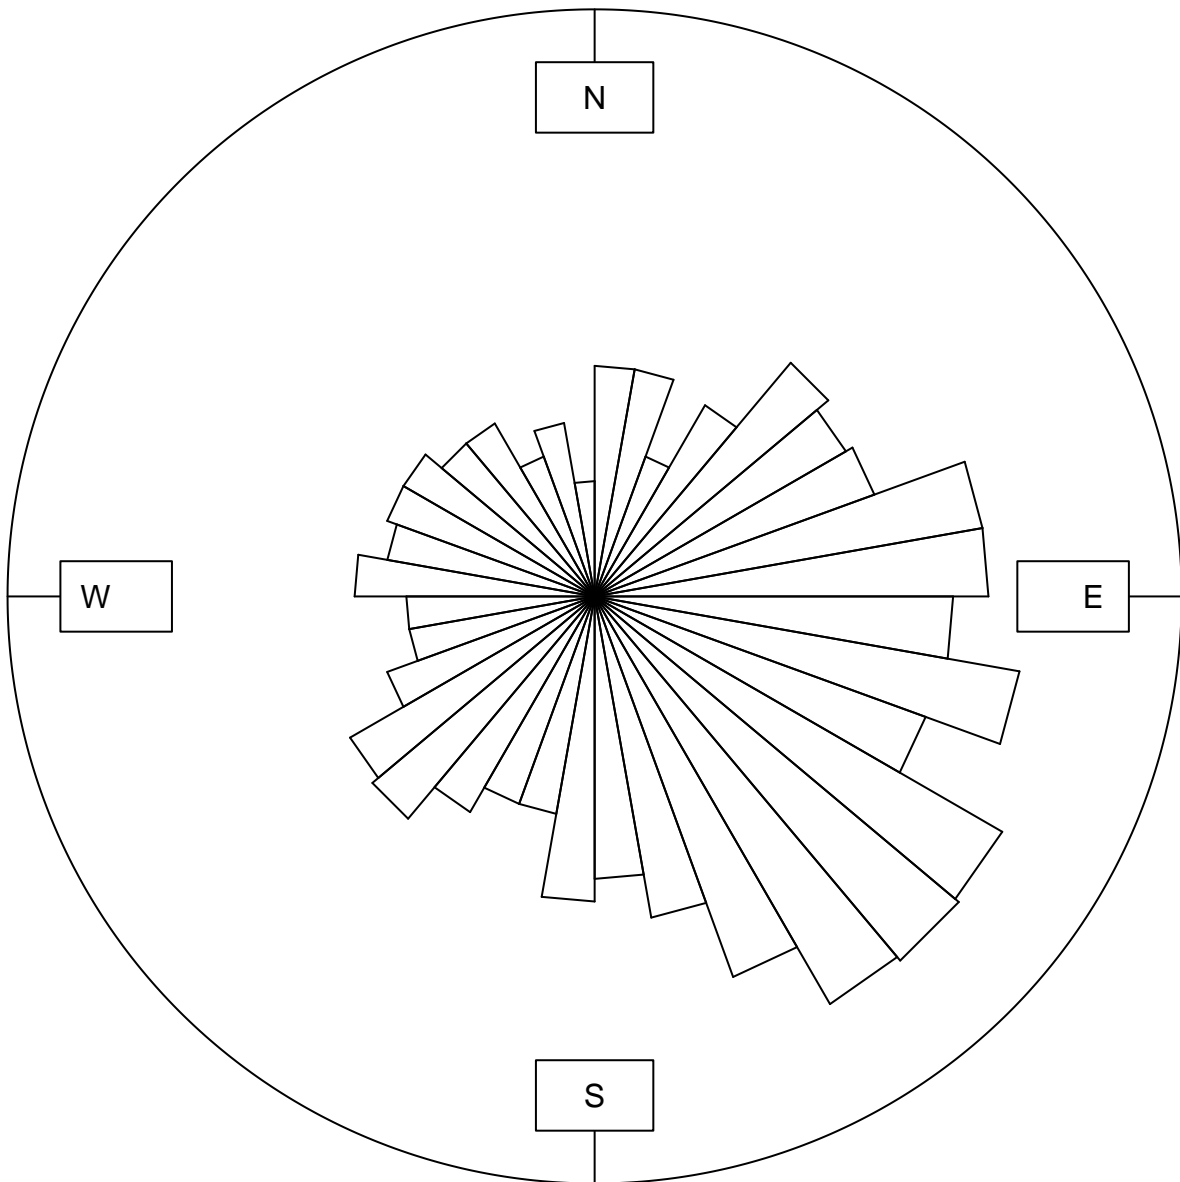

# bootstrap 189

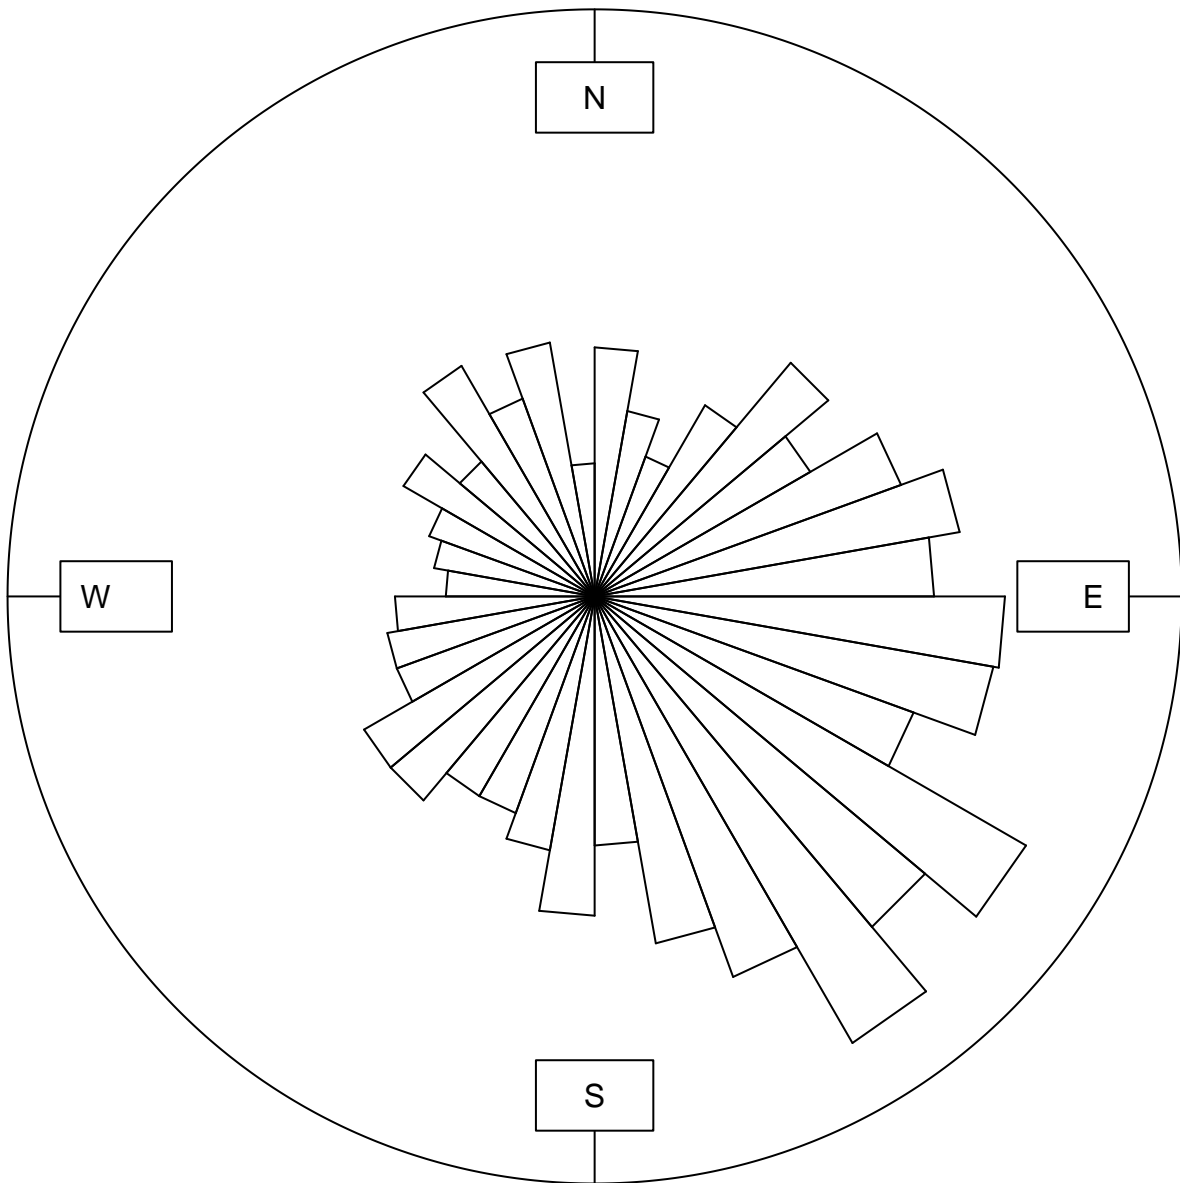

# bootstrap 190

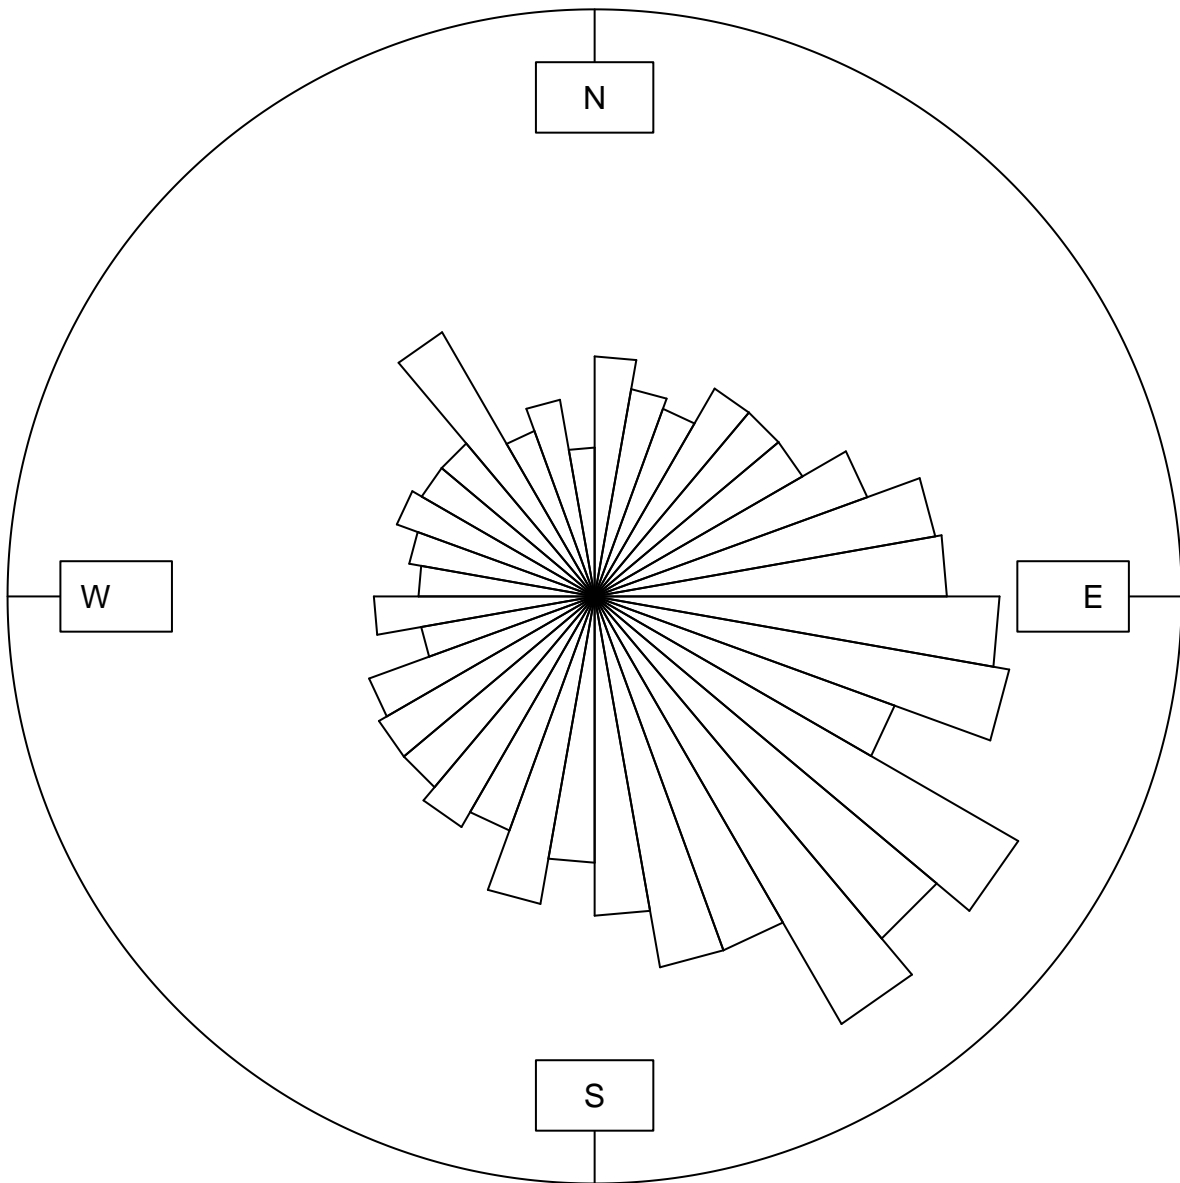

# bootstrap 191

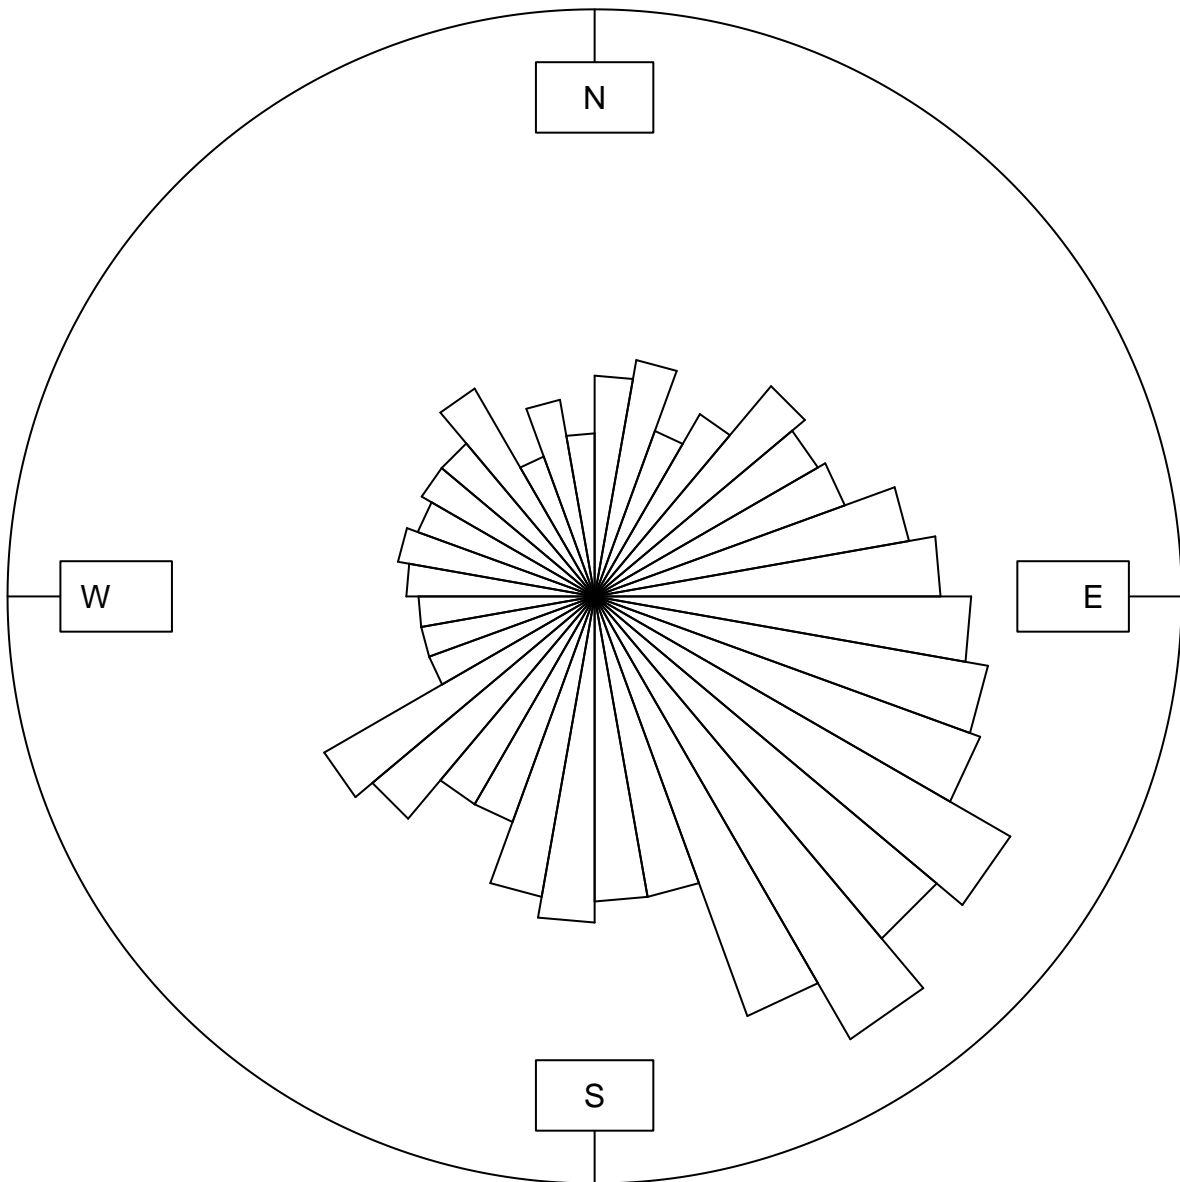

# bootstrap 192

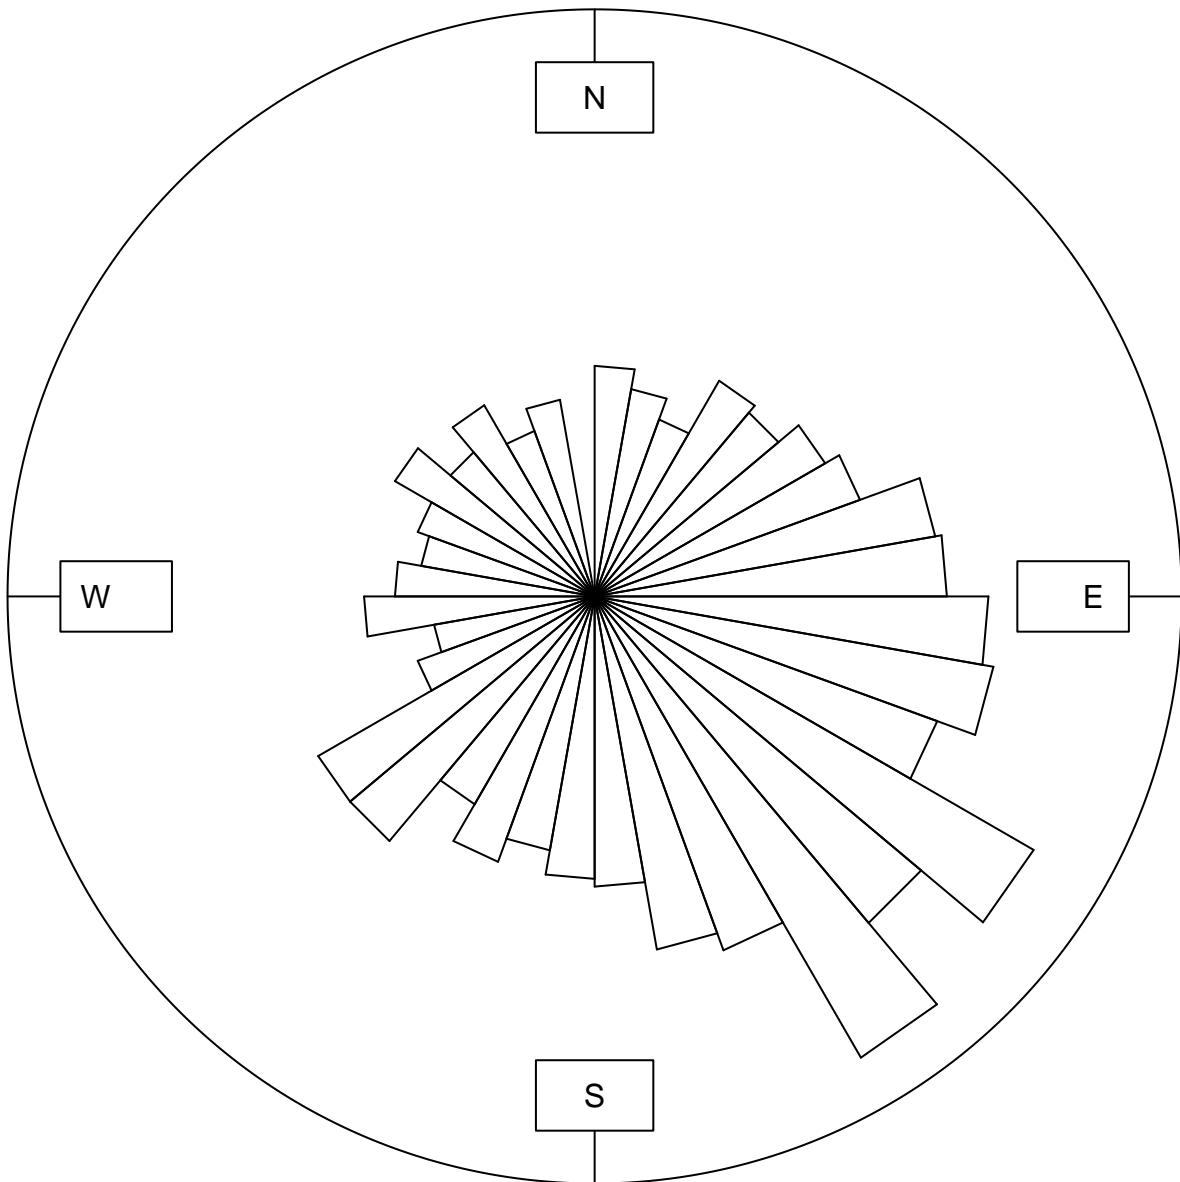



# bootstrap 193

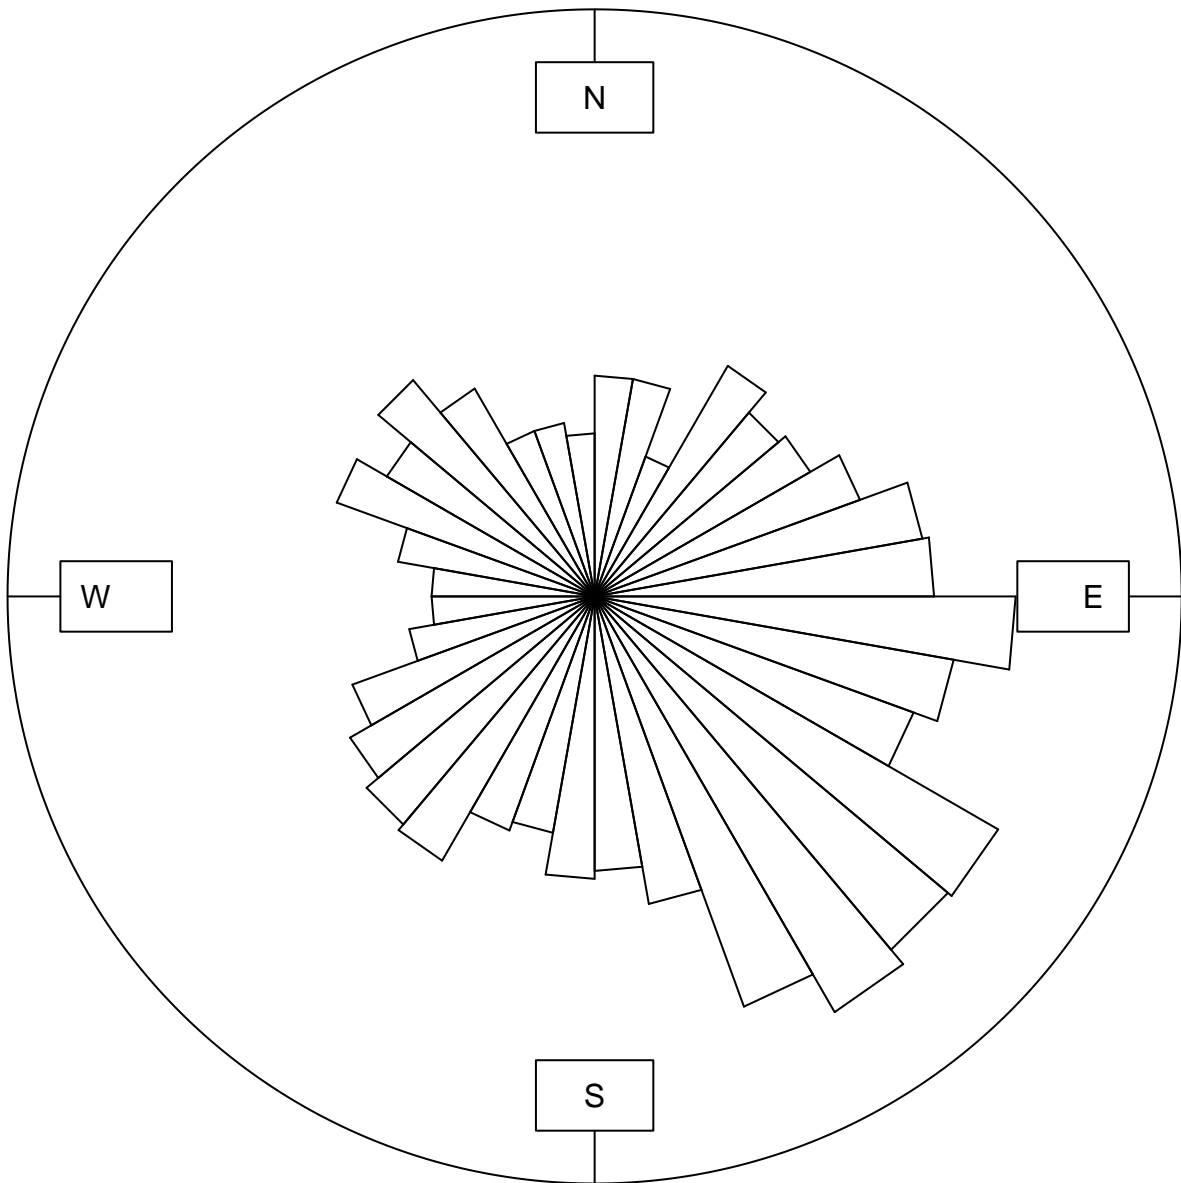

# bootstrap 194

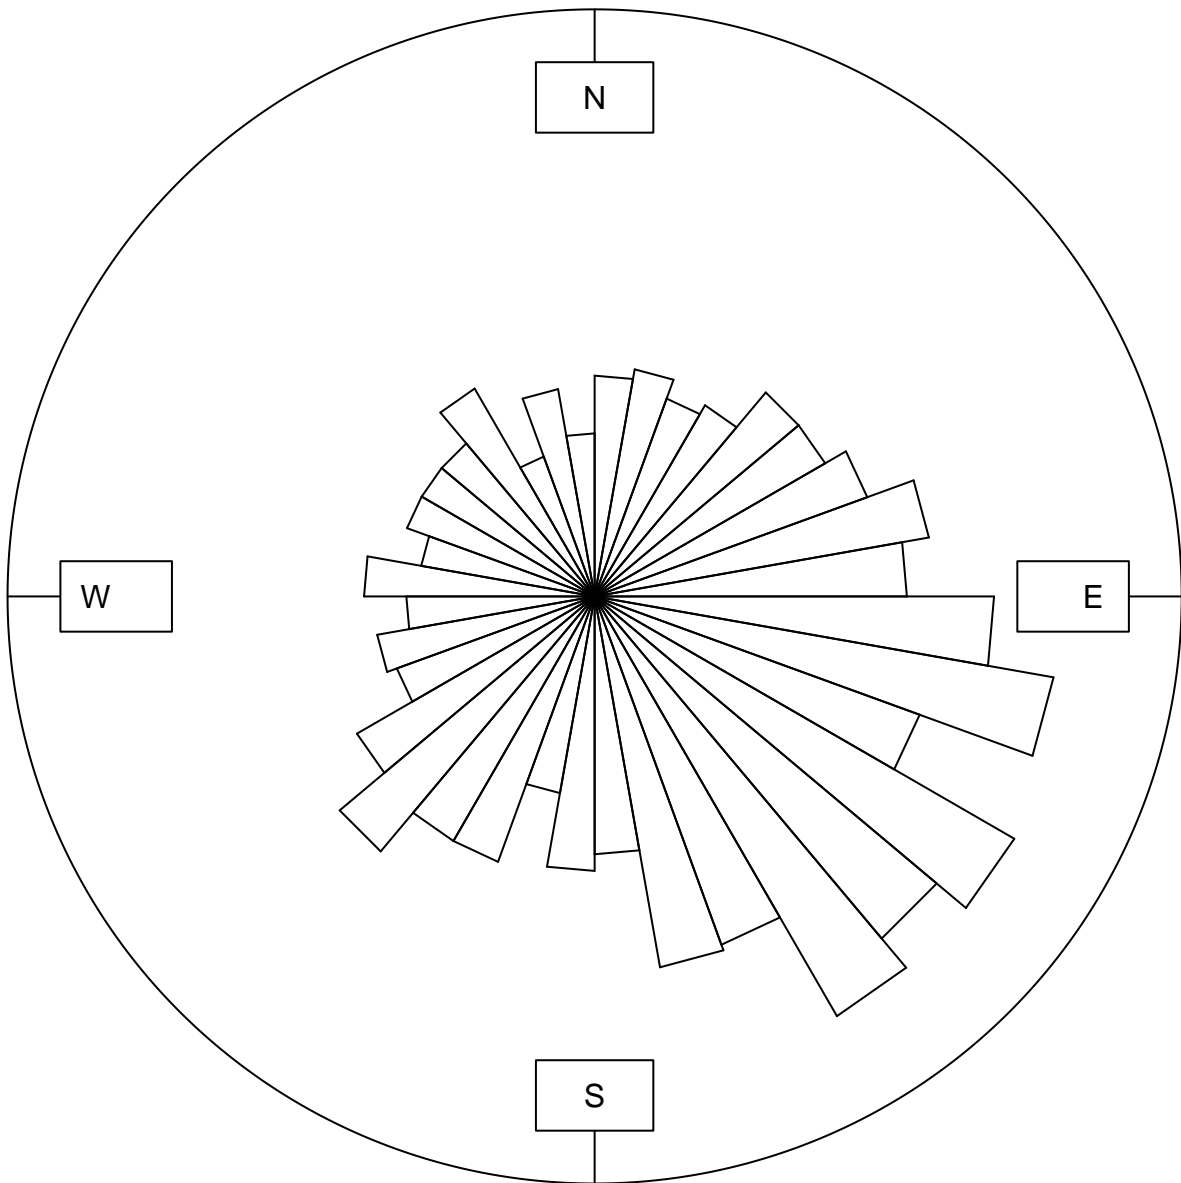

# bootstrap 195

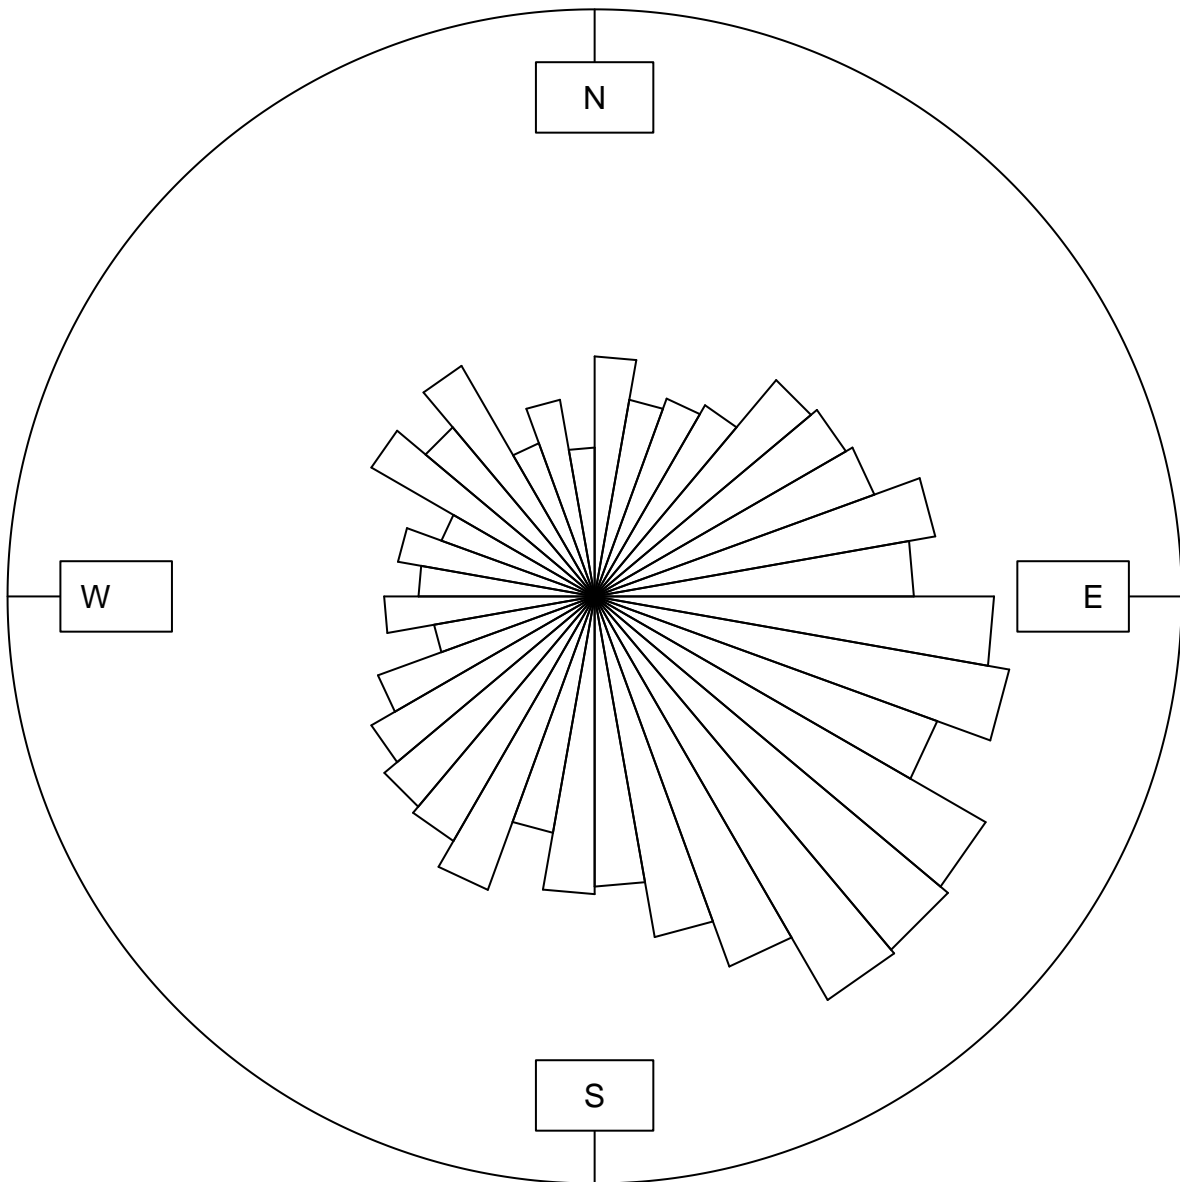

# bootstrap 196

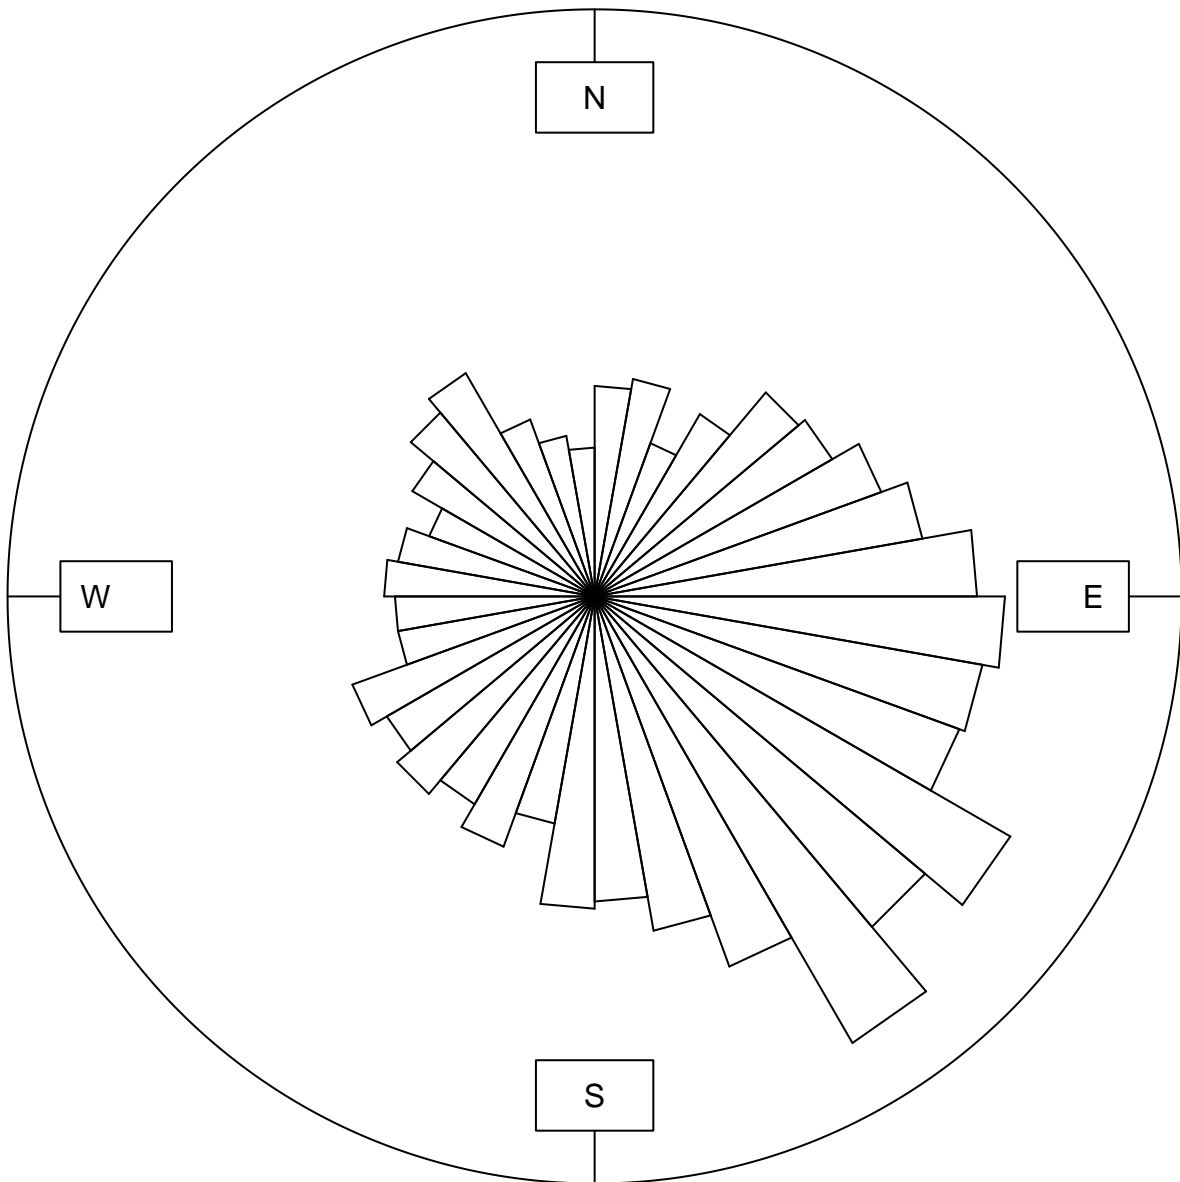

# bootstrap 197

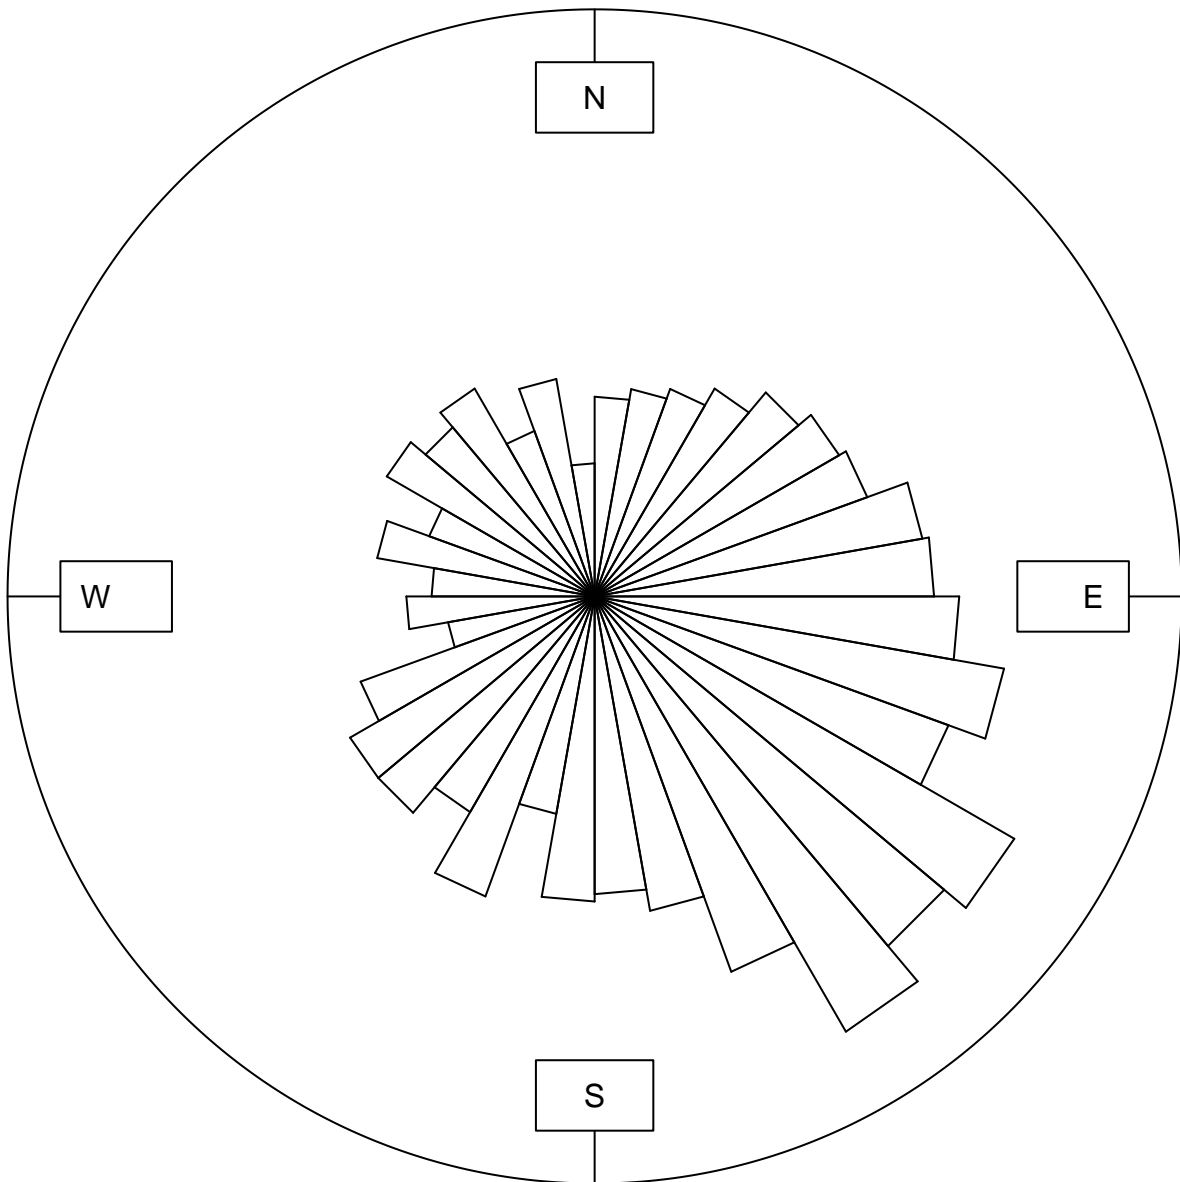

# bootstrap 198

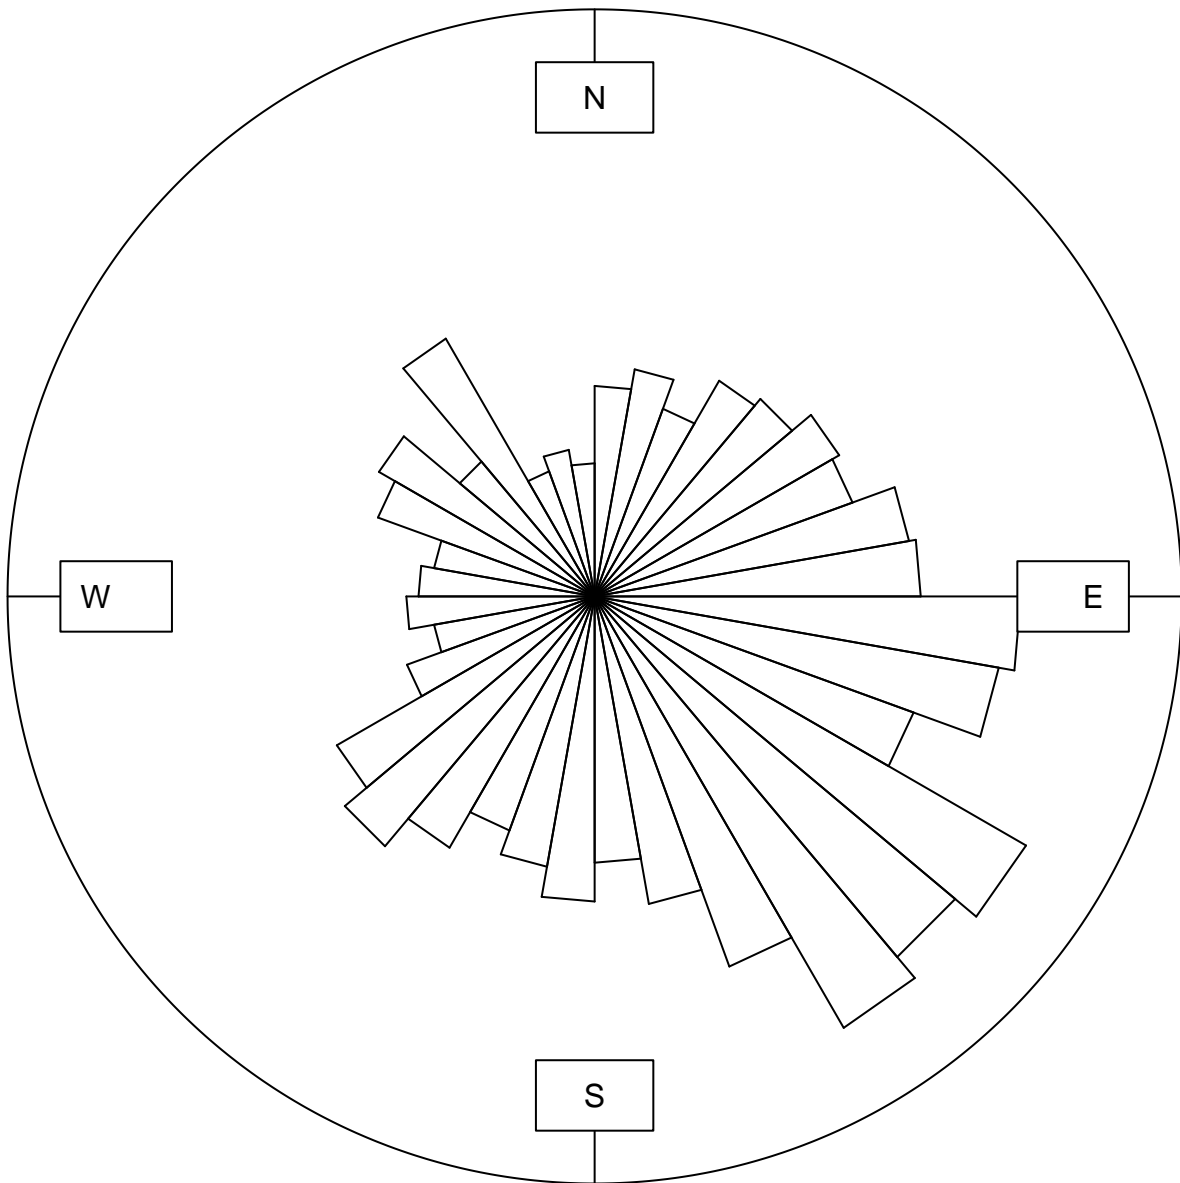

# bootstrap 199

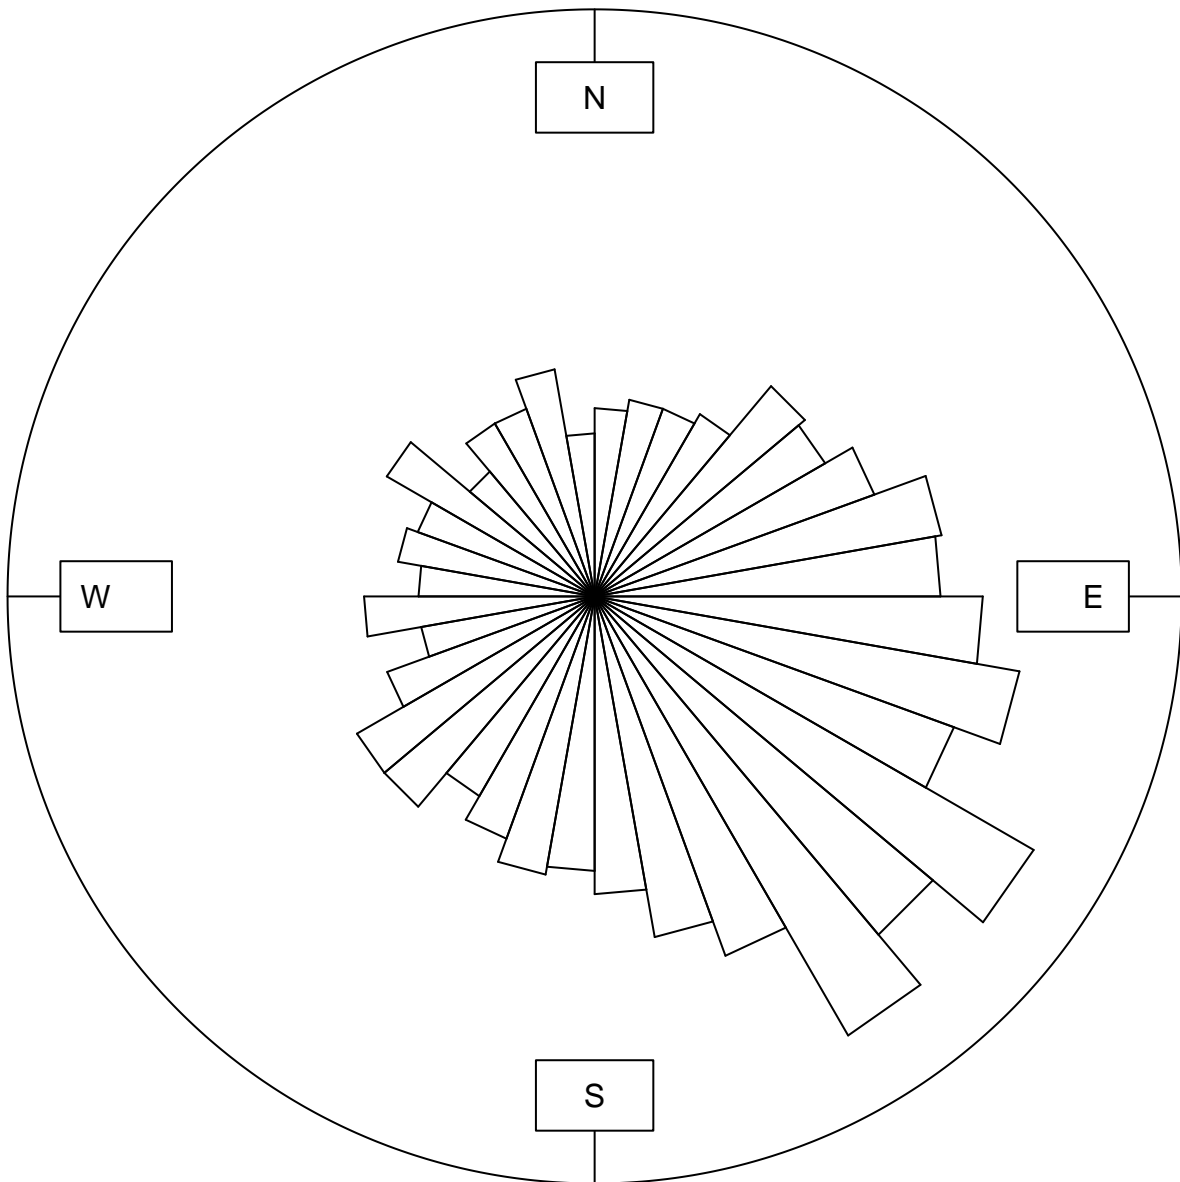

**bootstrap 200**

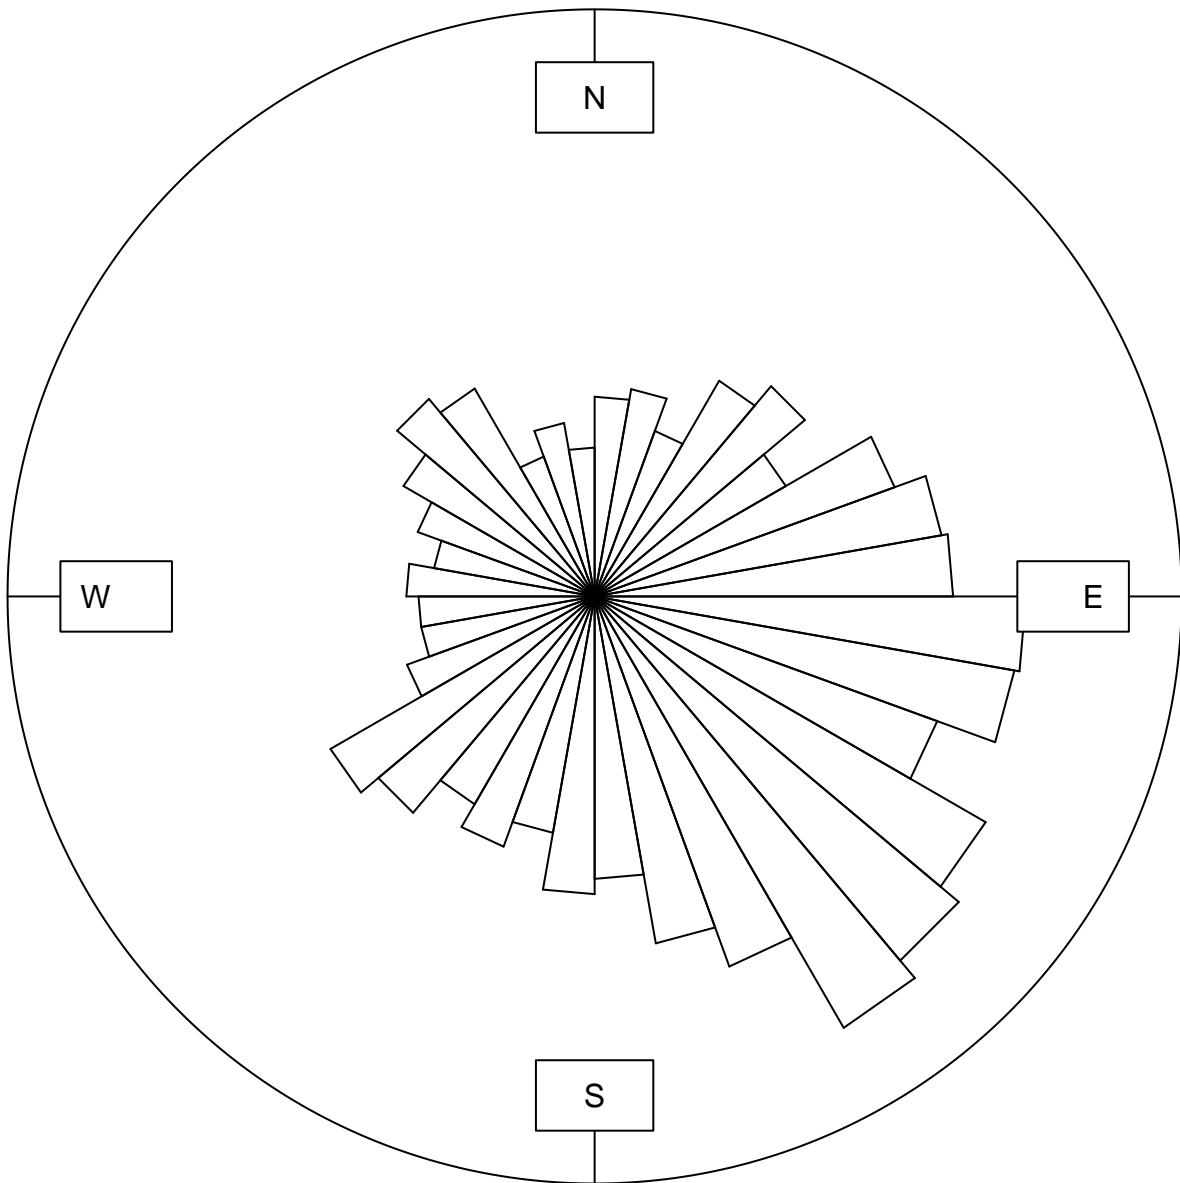



# bootstrap 201

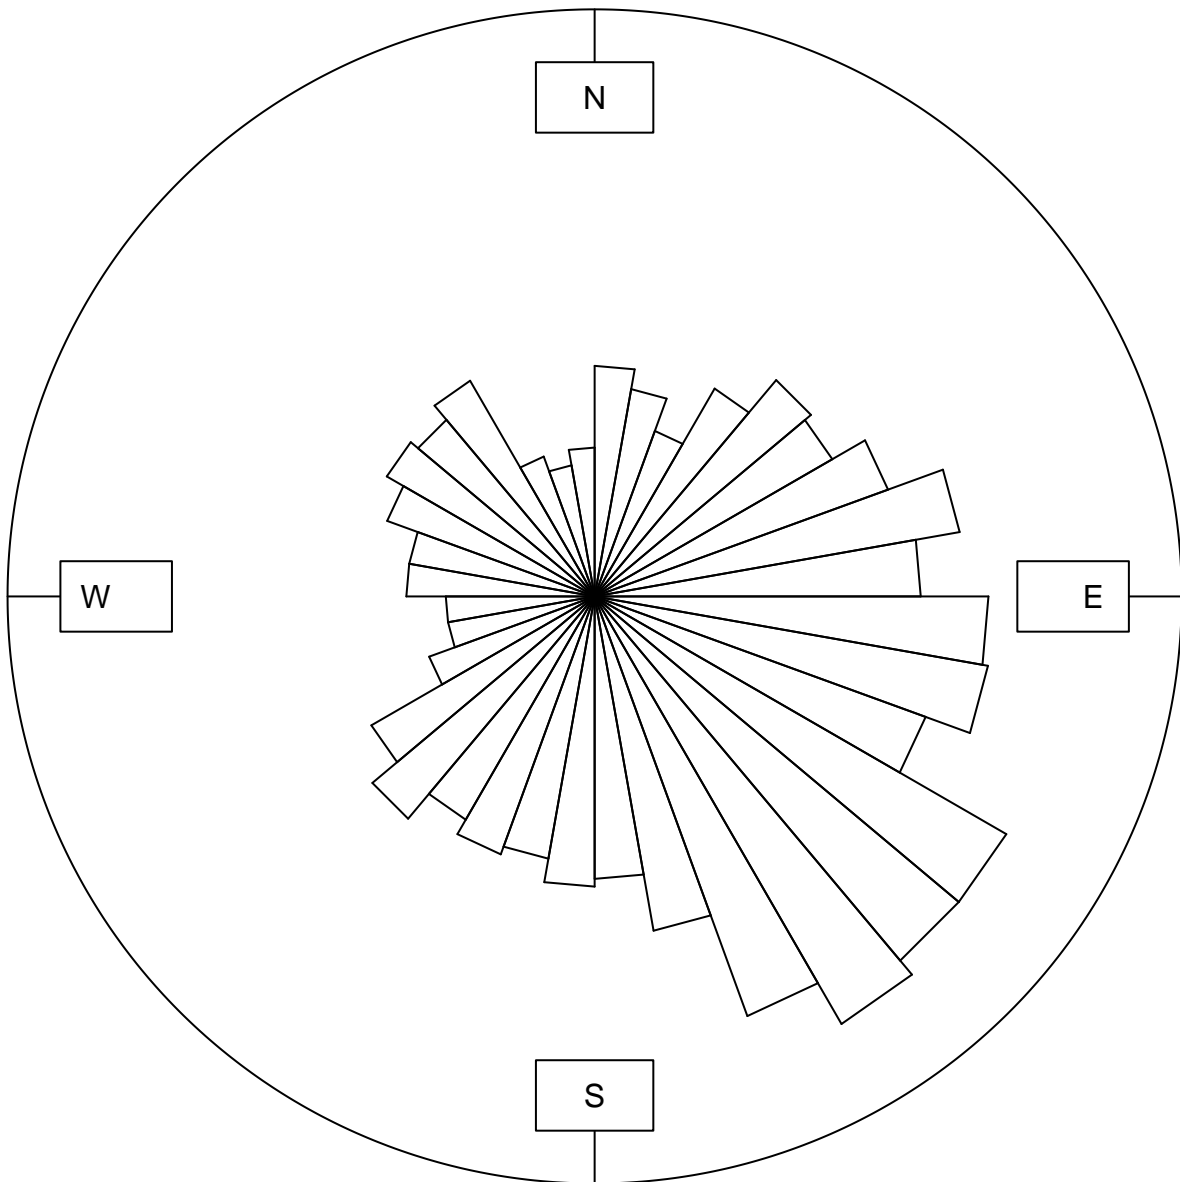

# bootstrap 202

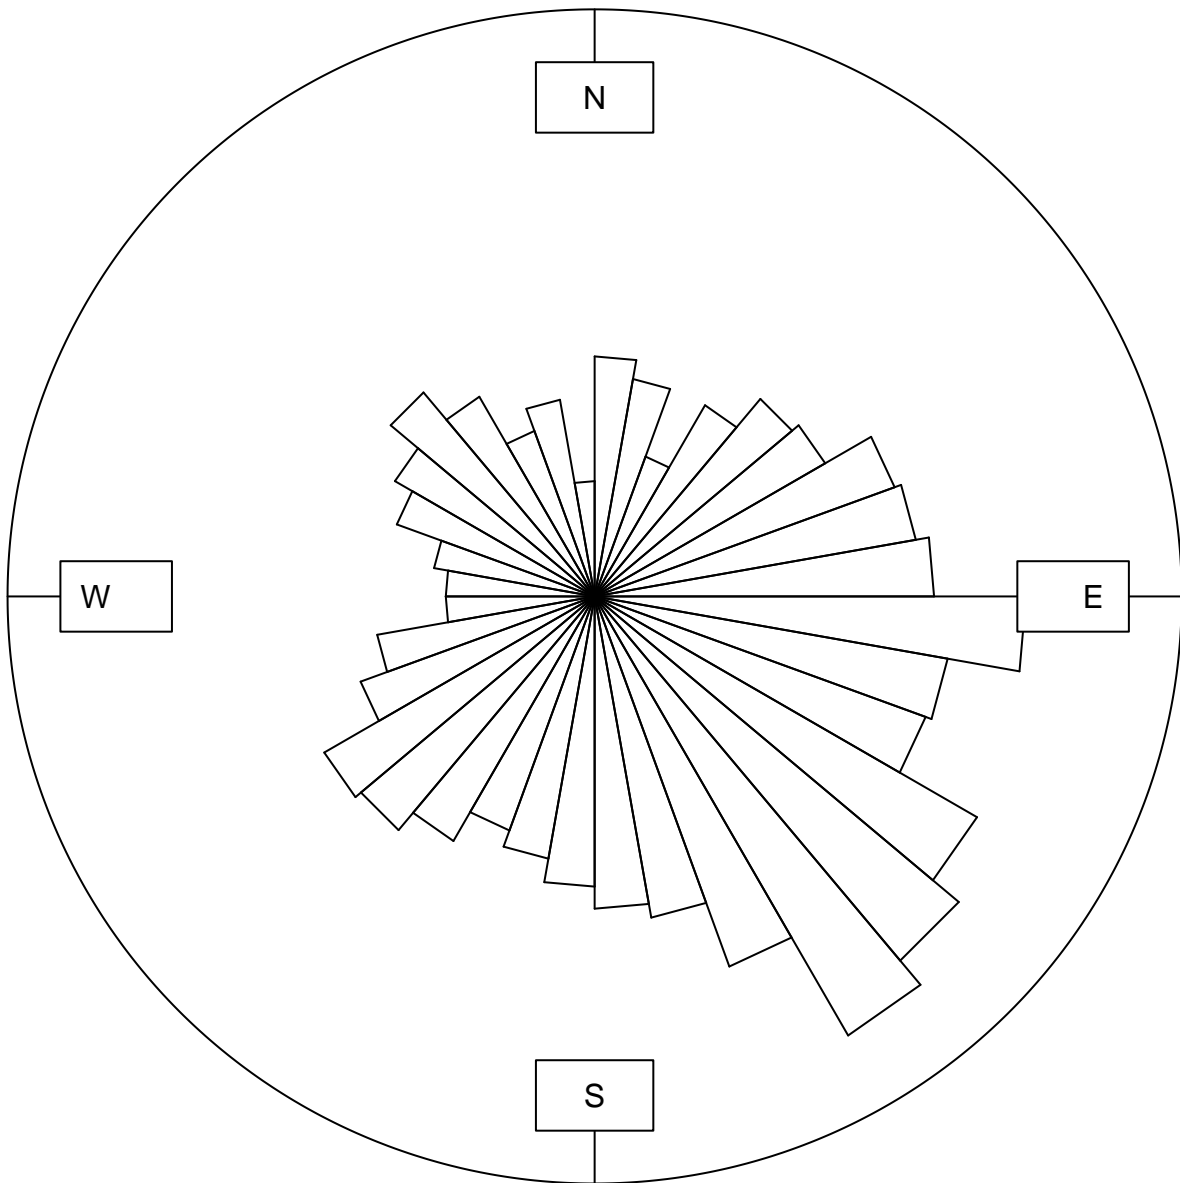

# bootstrap 203

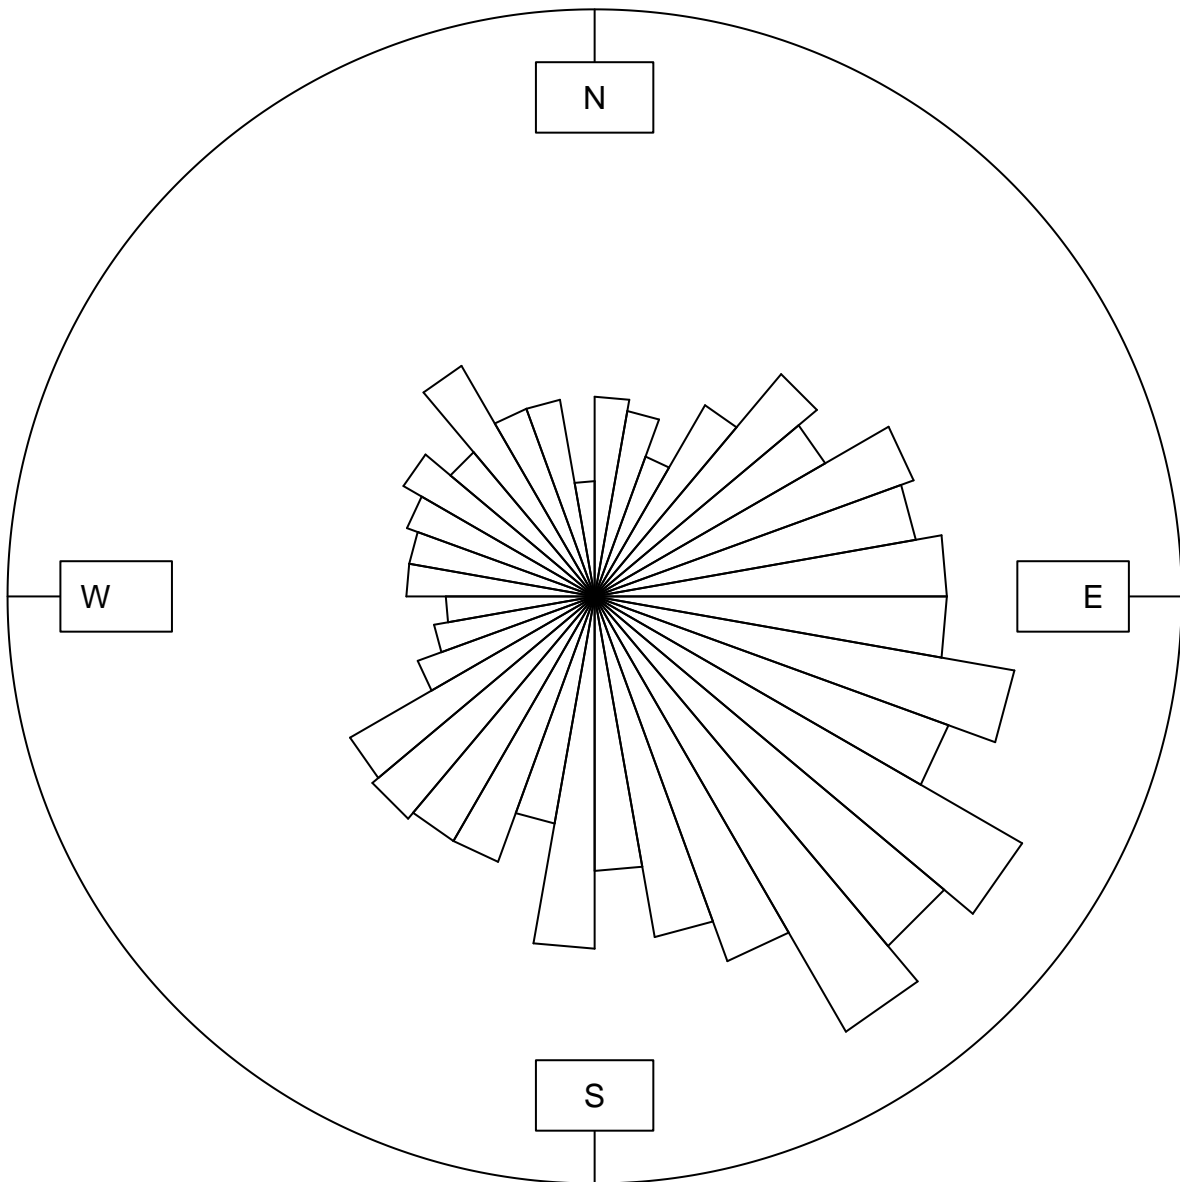

# bootstrap 204

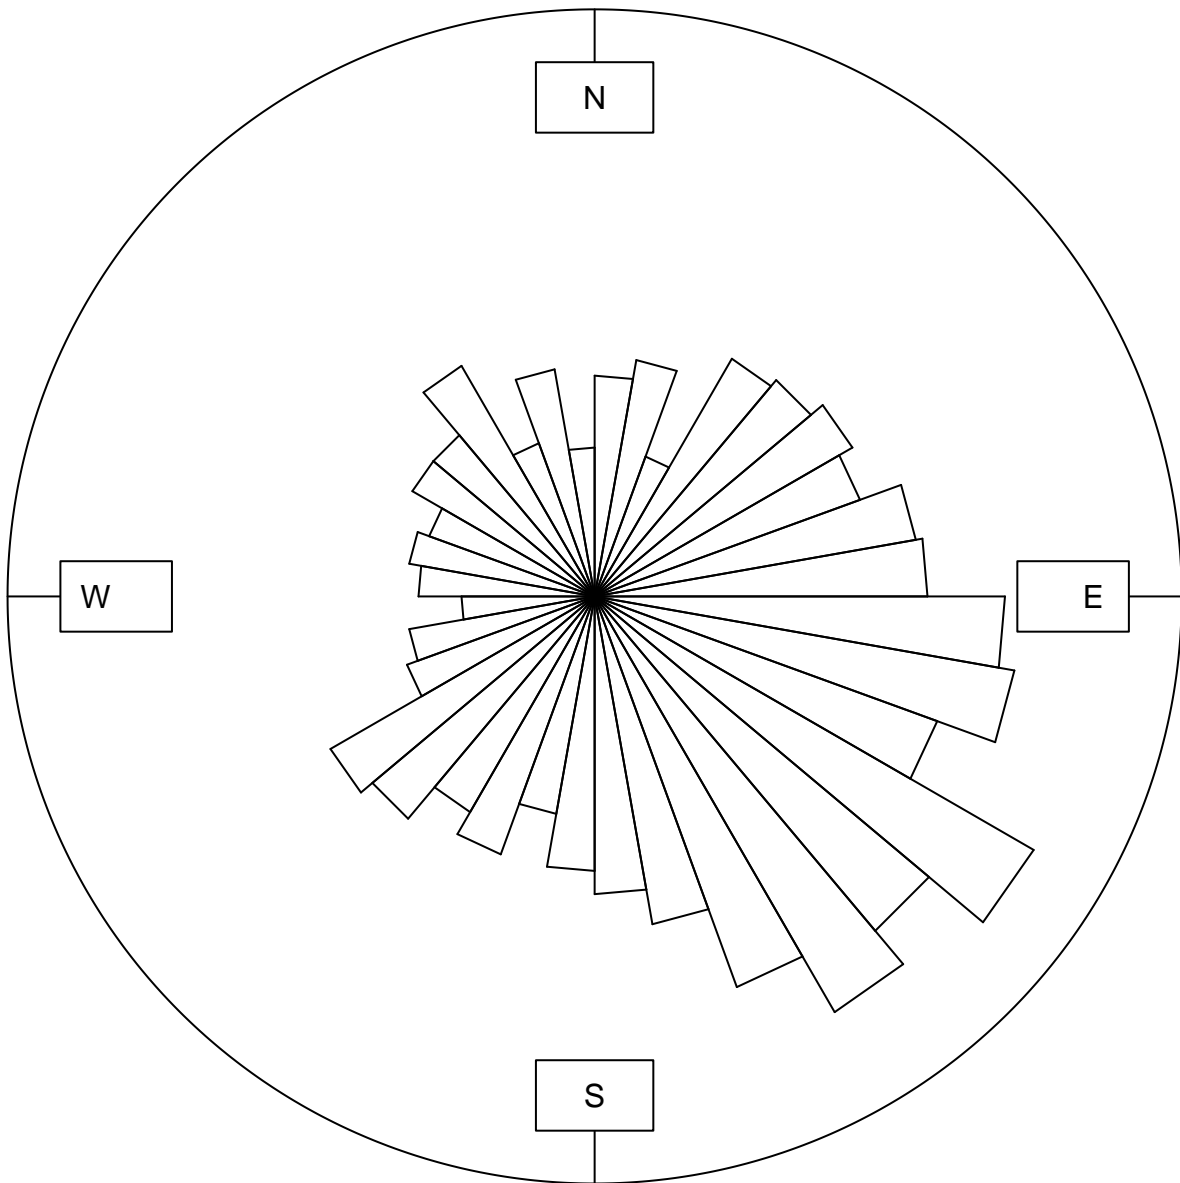

# bootstrap 205

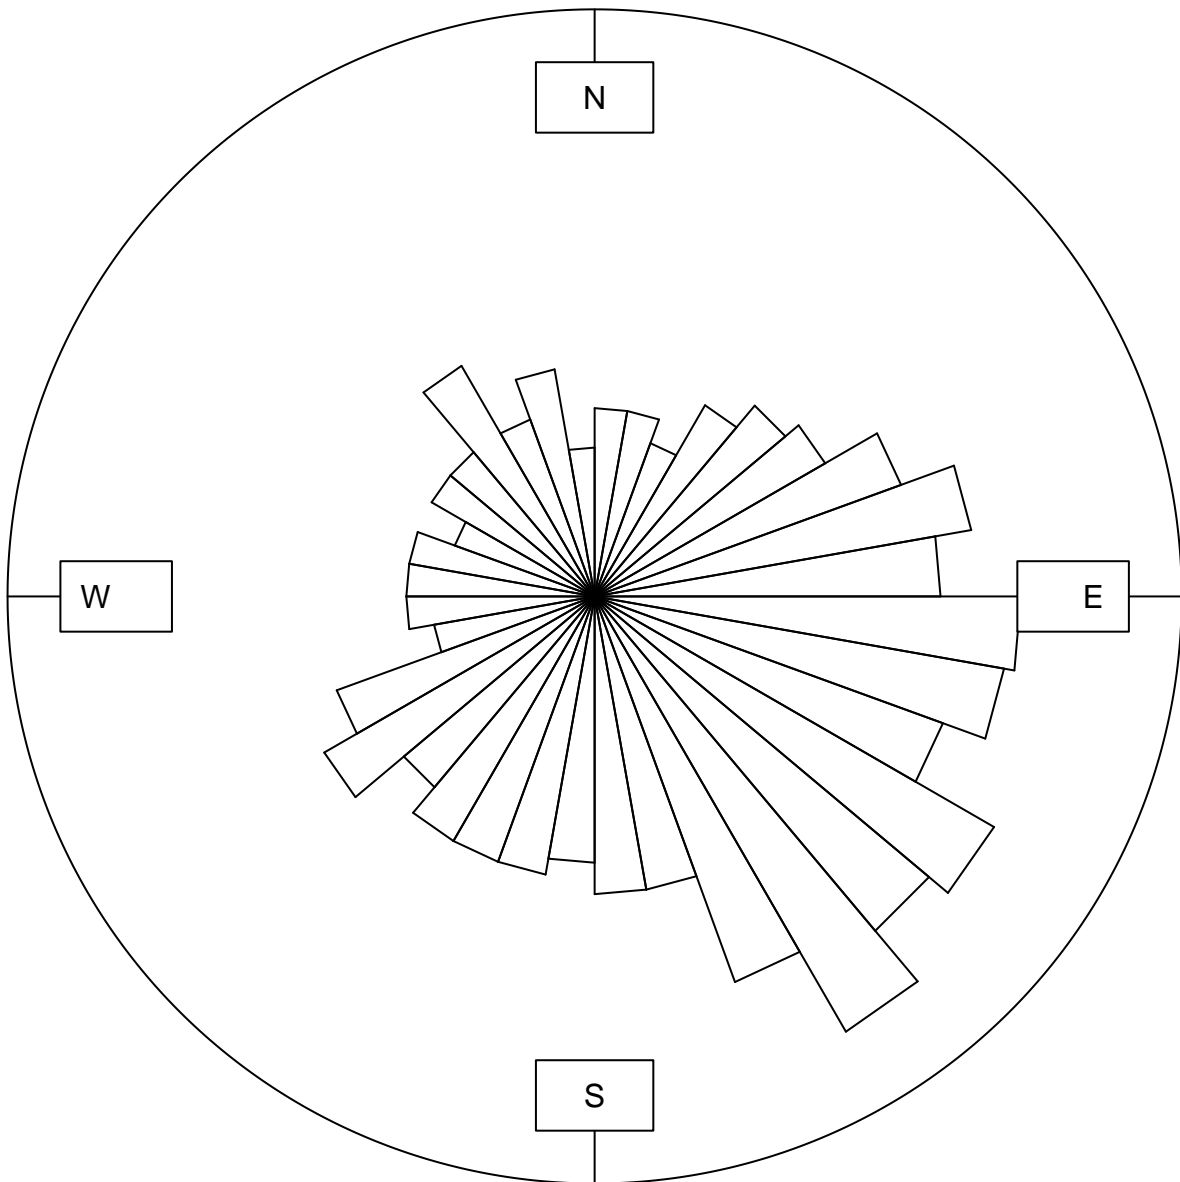

# bootstrap 206

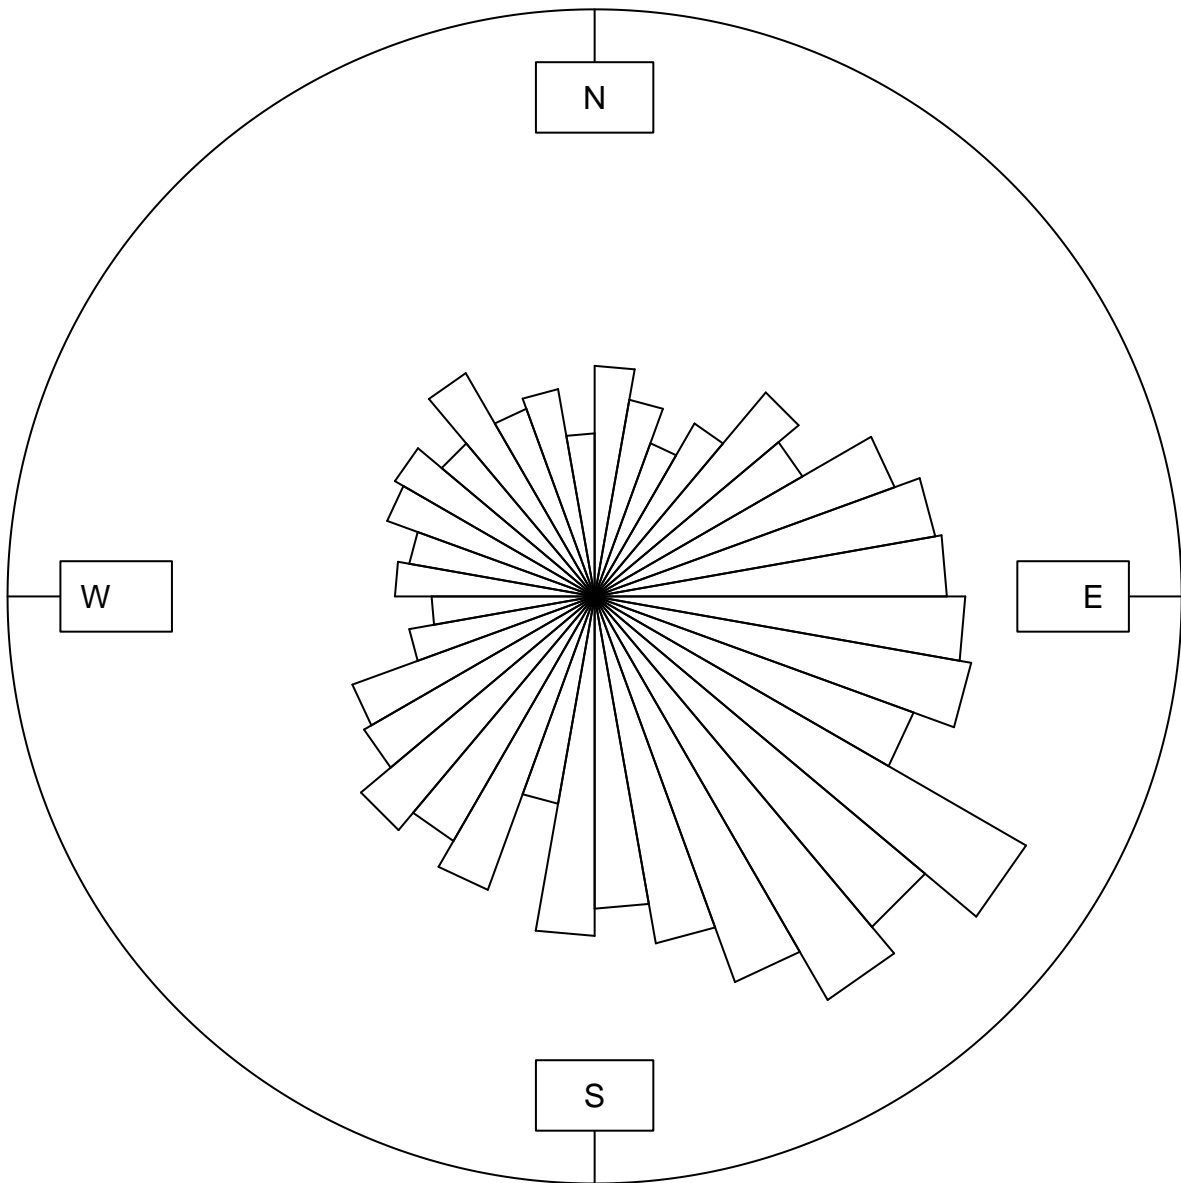

# bootstrap 207

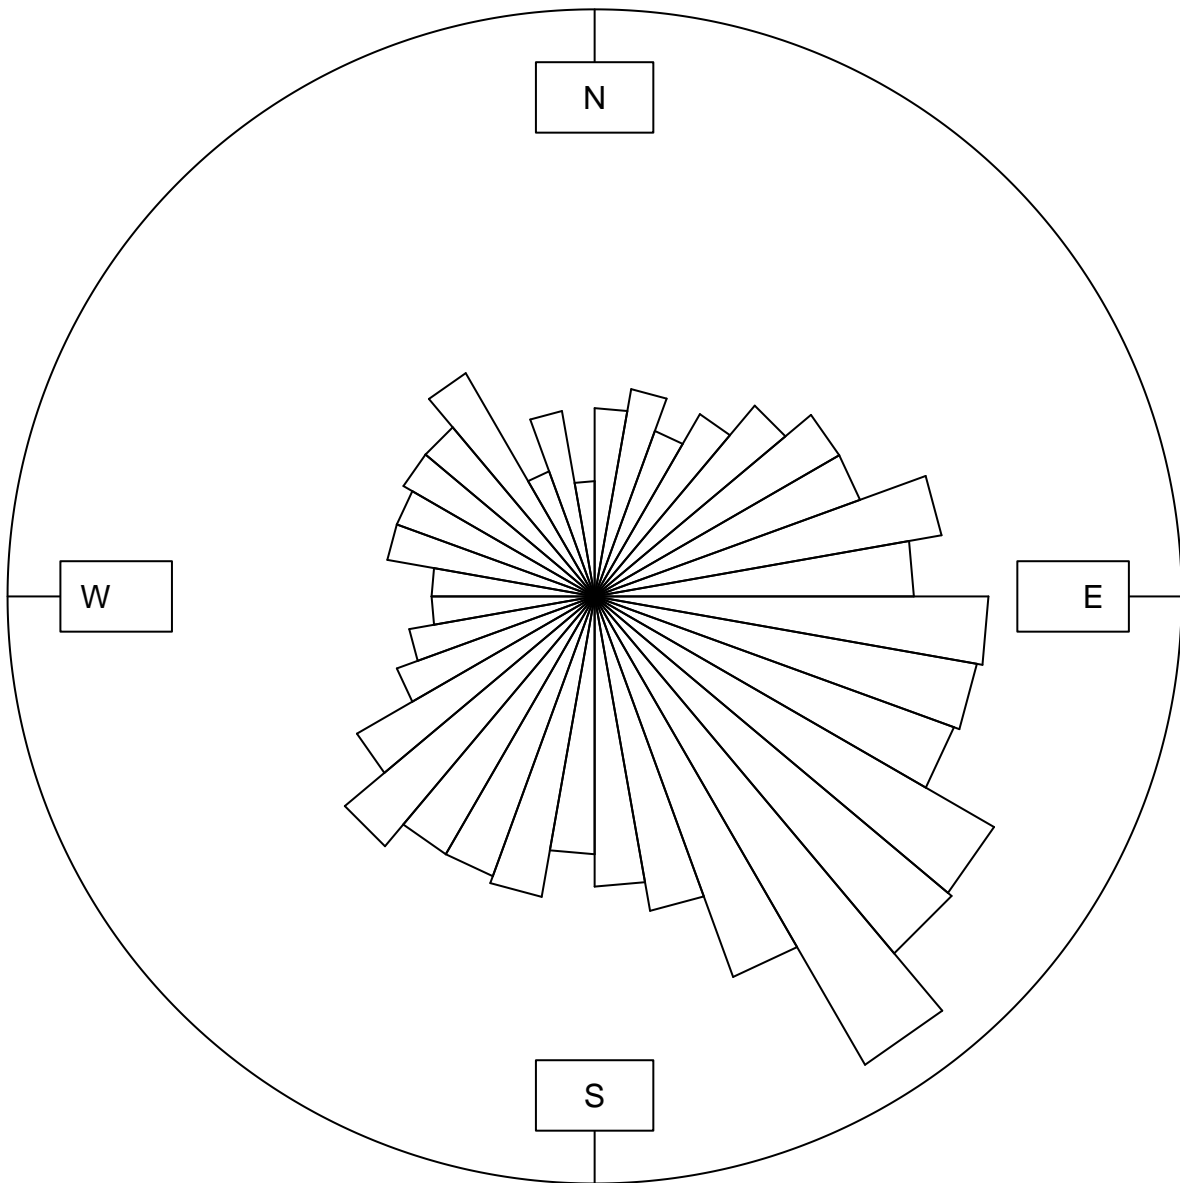

# bootstrap 208

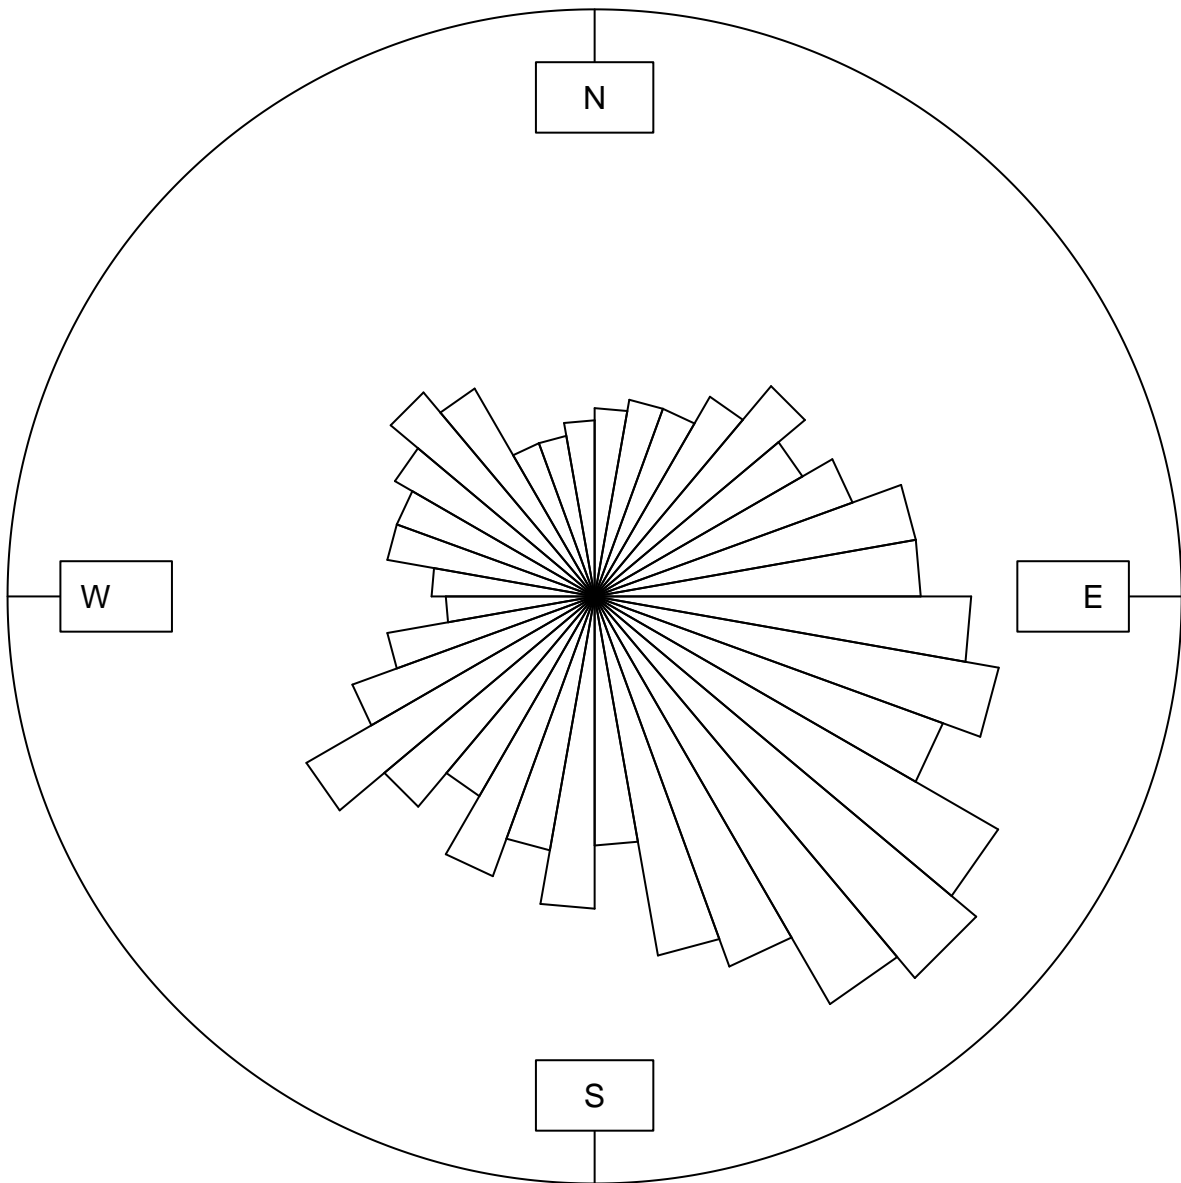



# bootstrap 209

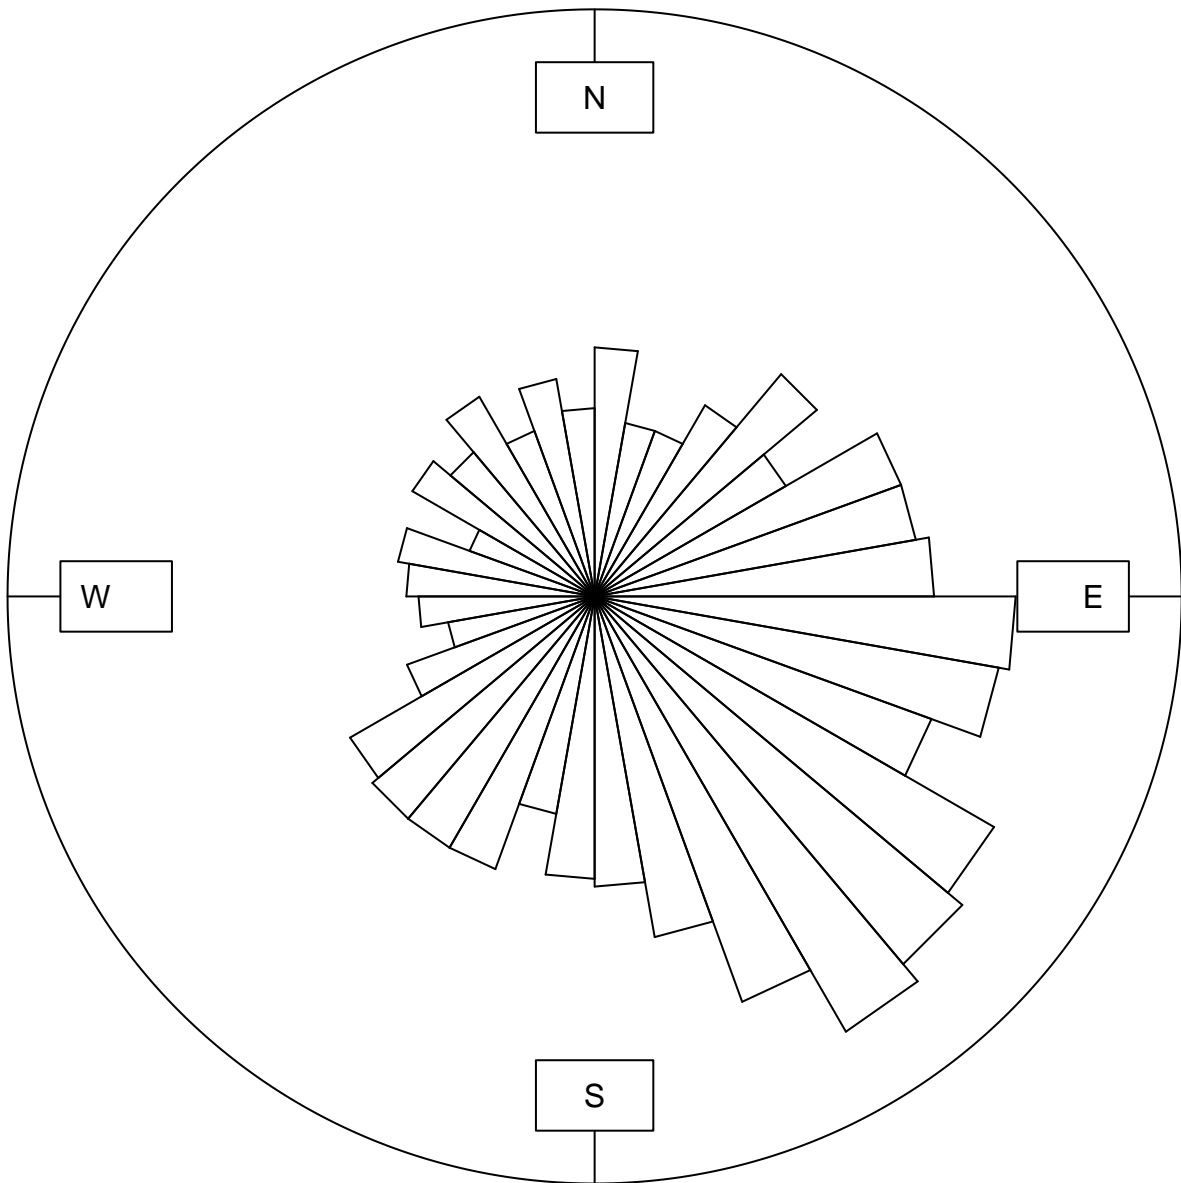

# bootstrap 210

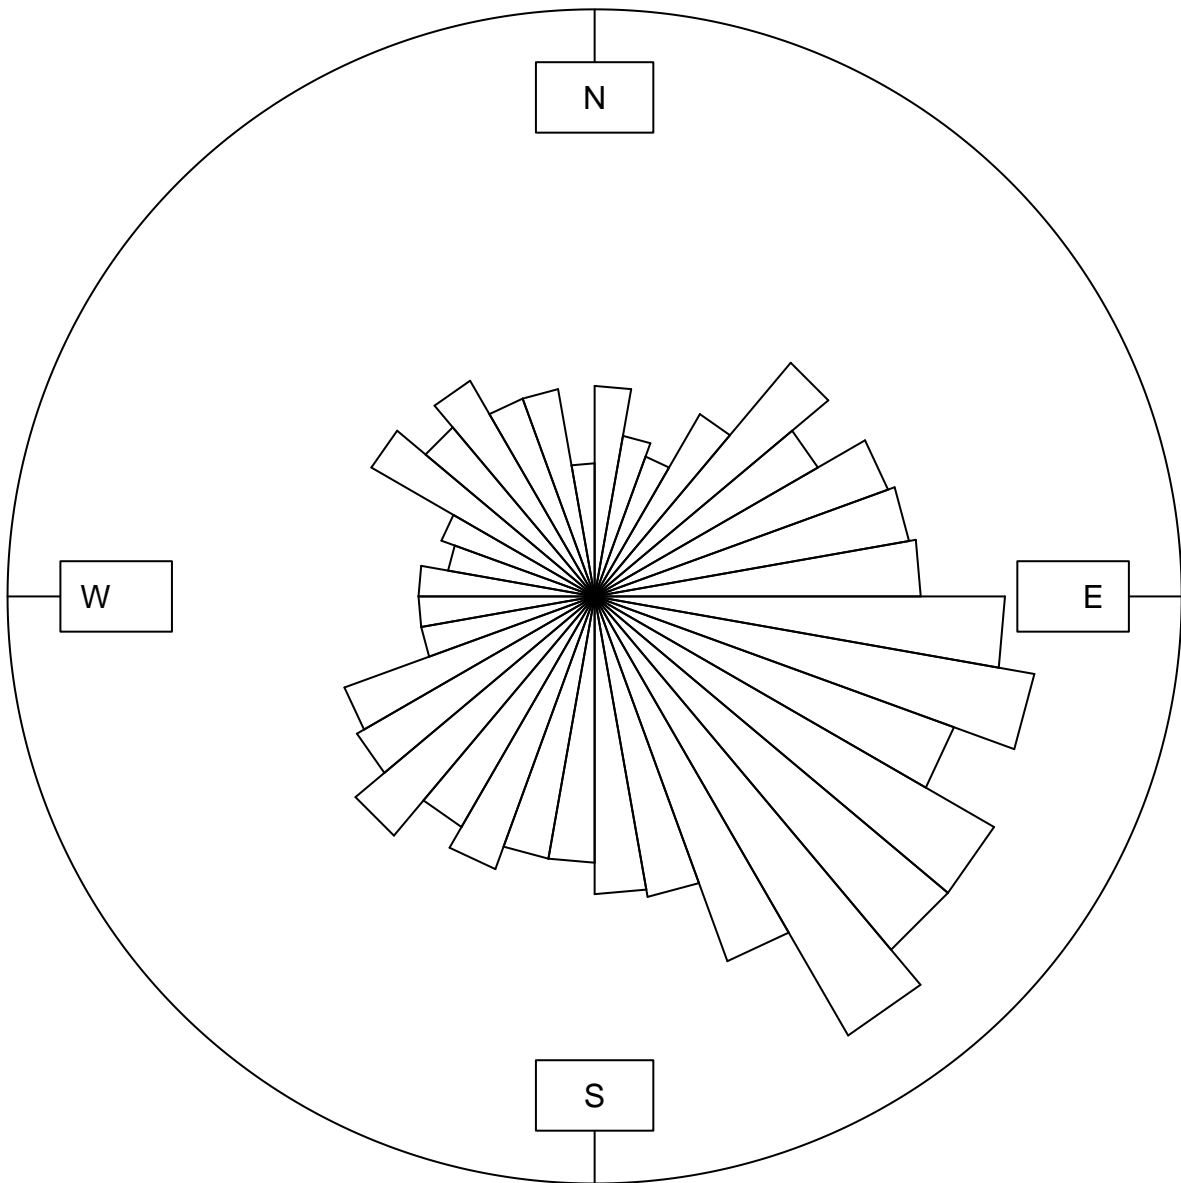

# bootstrap 211

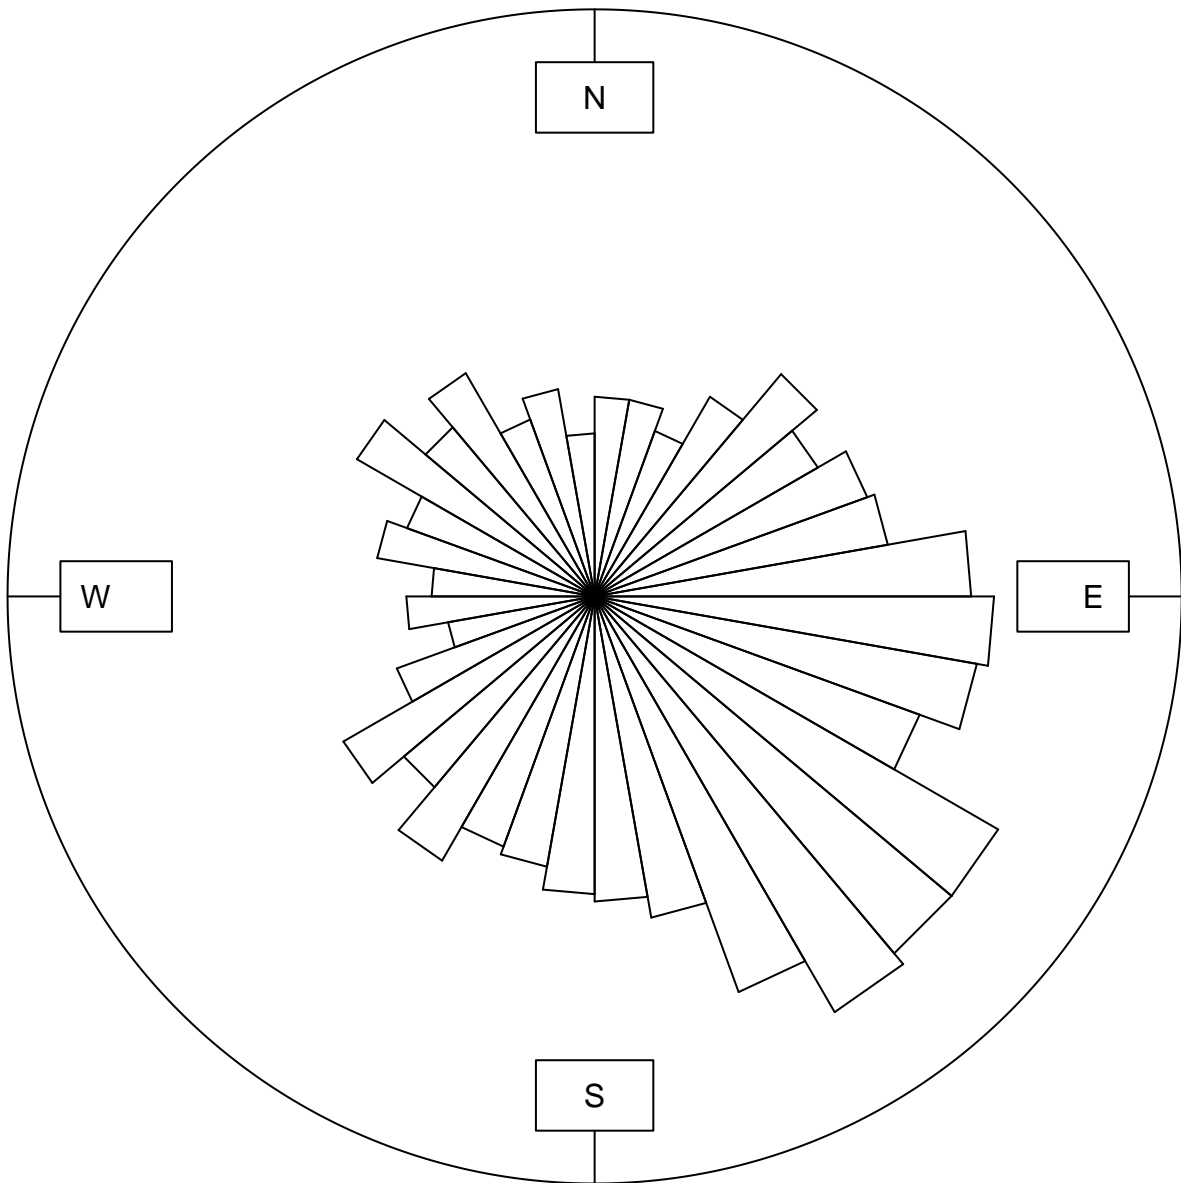

# bootstrap 212

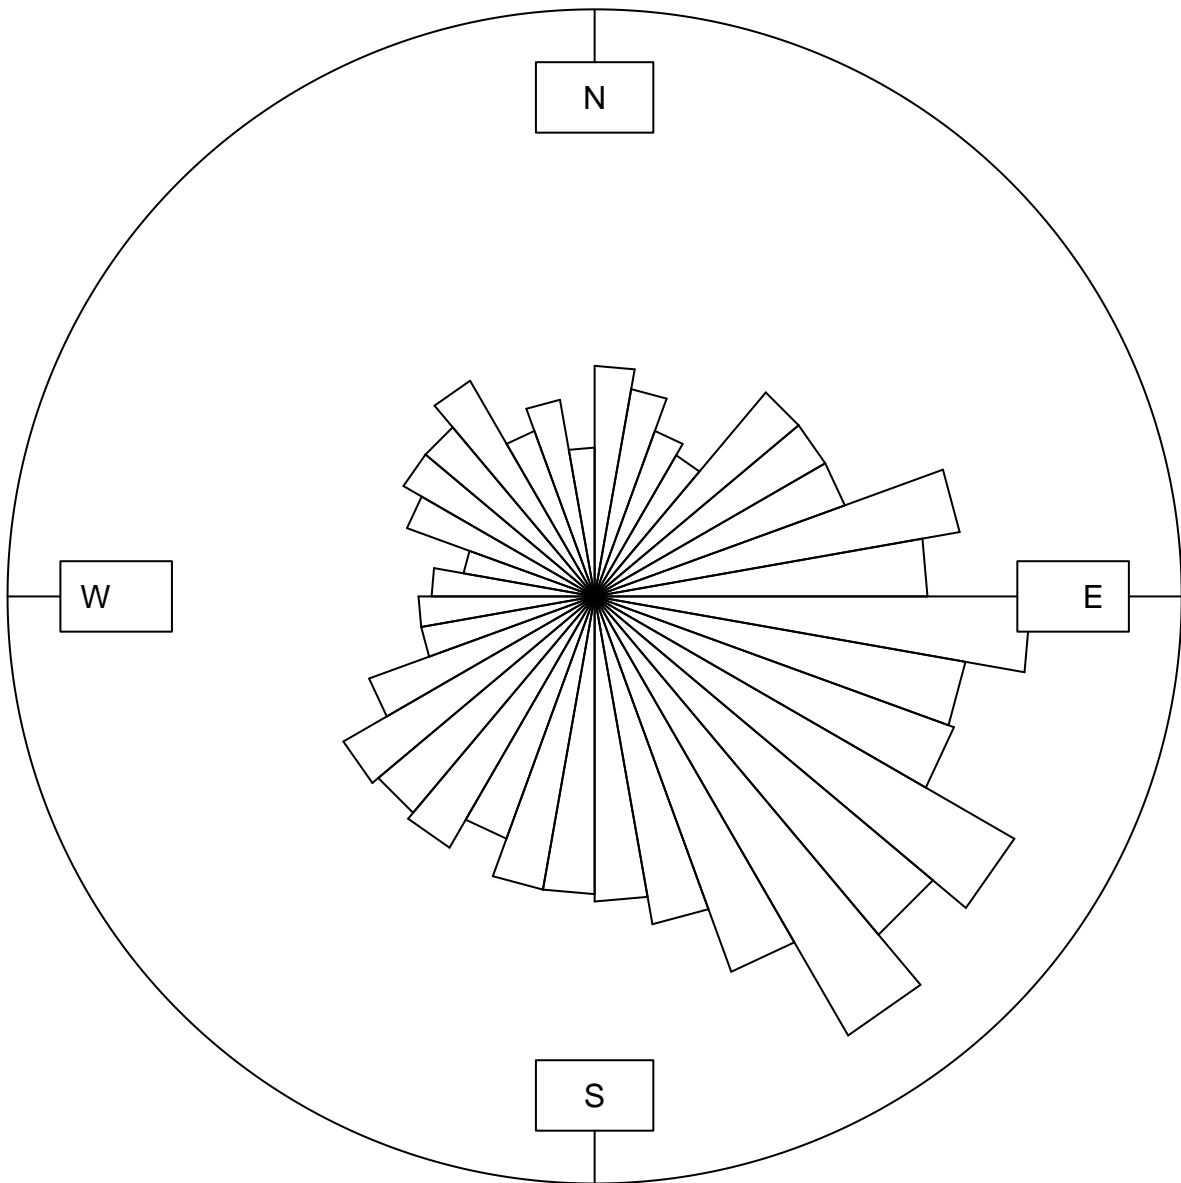

# bootstrap 213

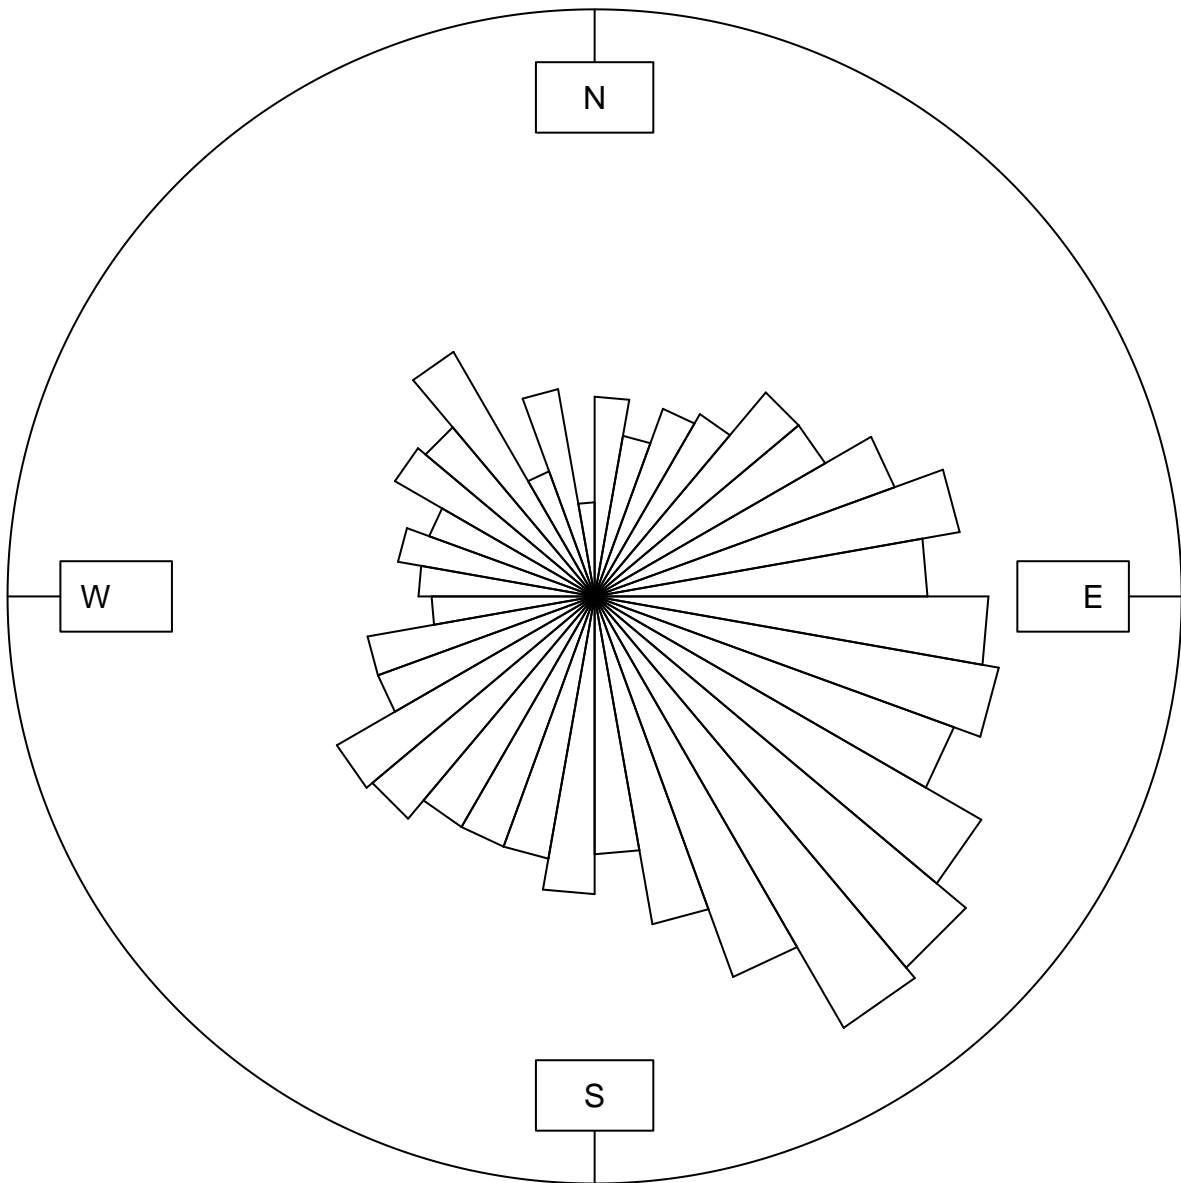

# bootstrap 214

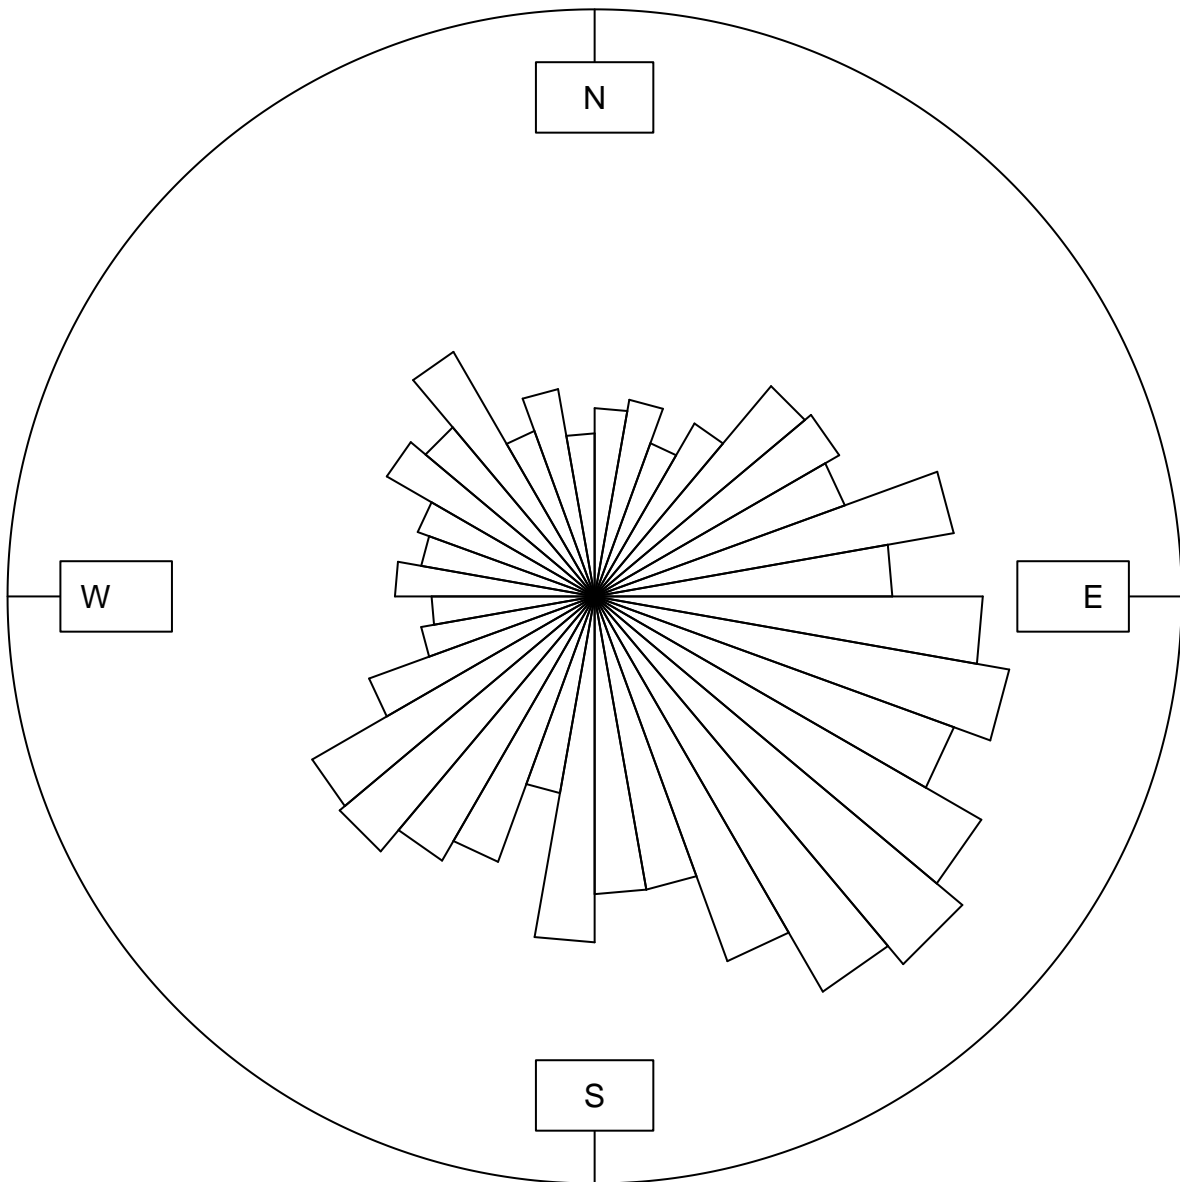

# bootstrap 215

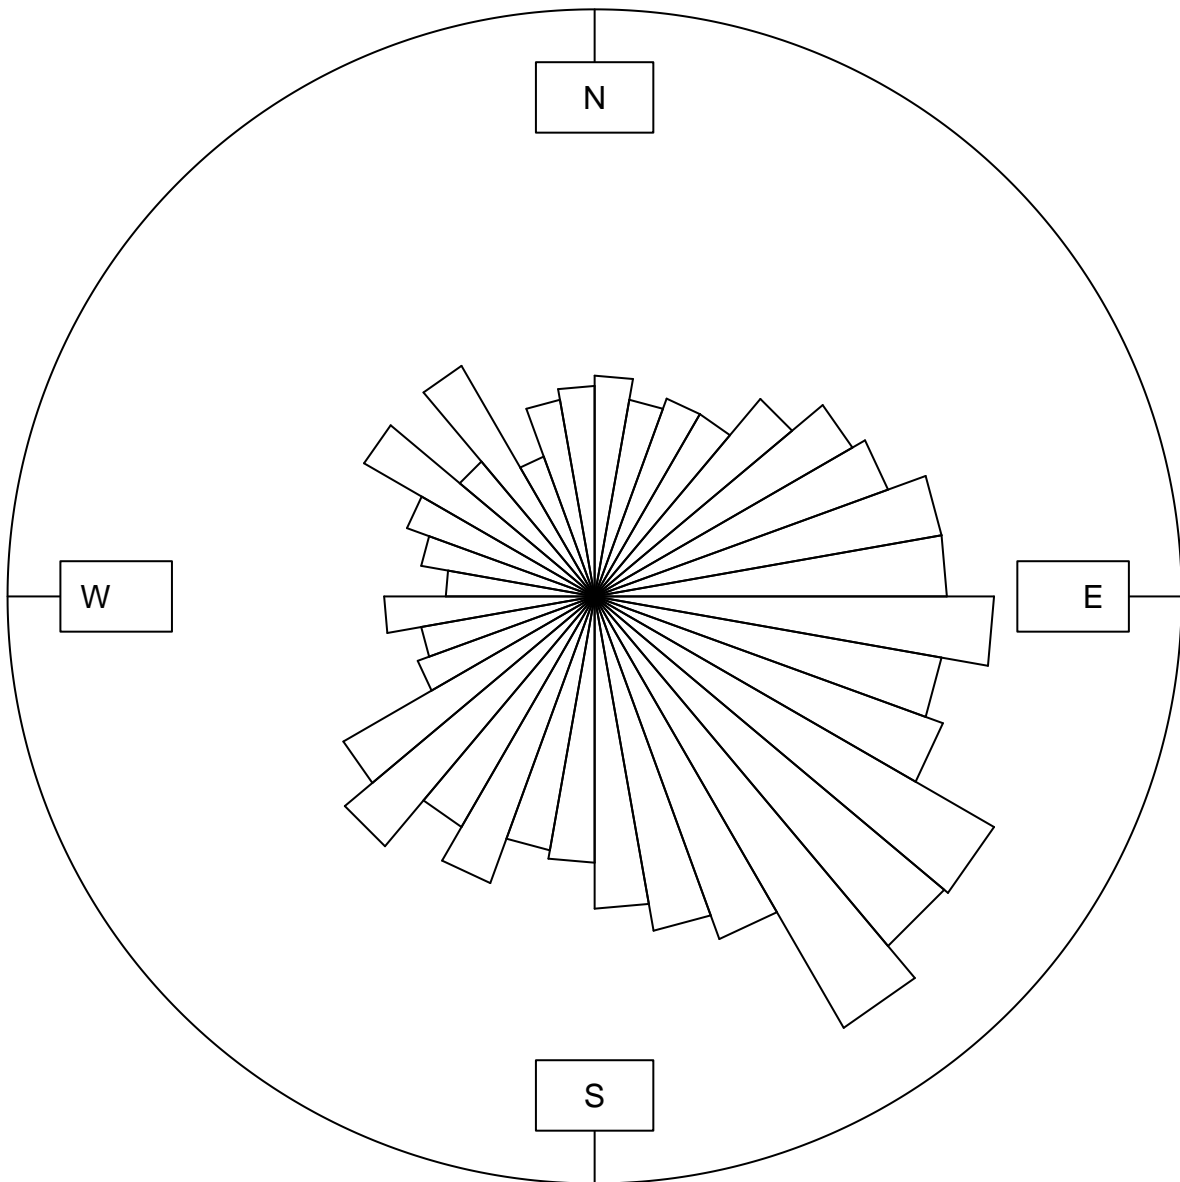

# bootstrap 216

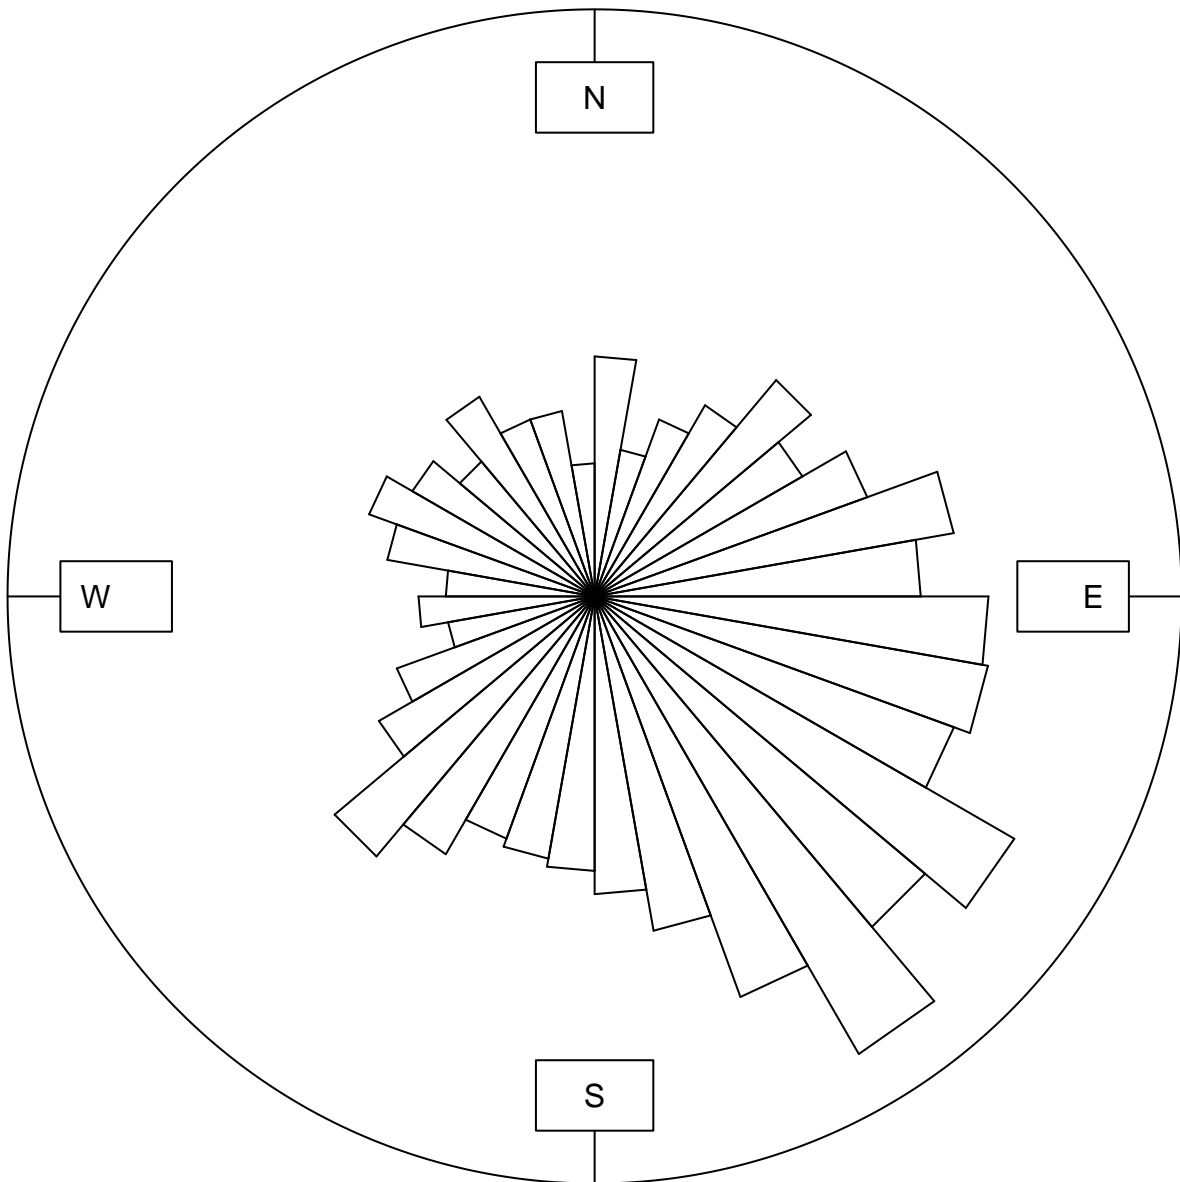



# bootstrap 217

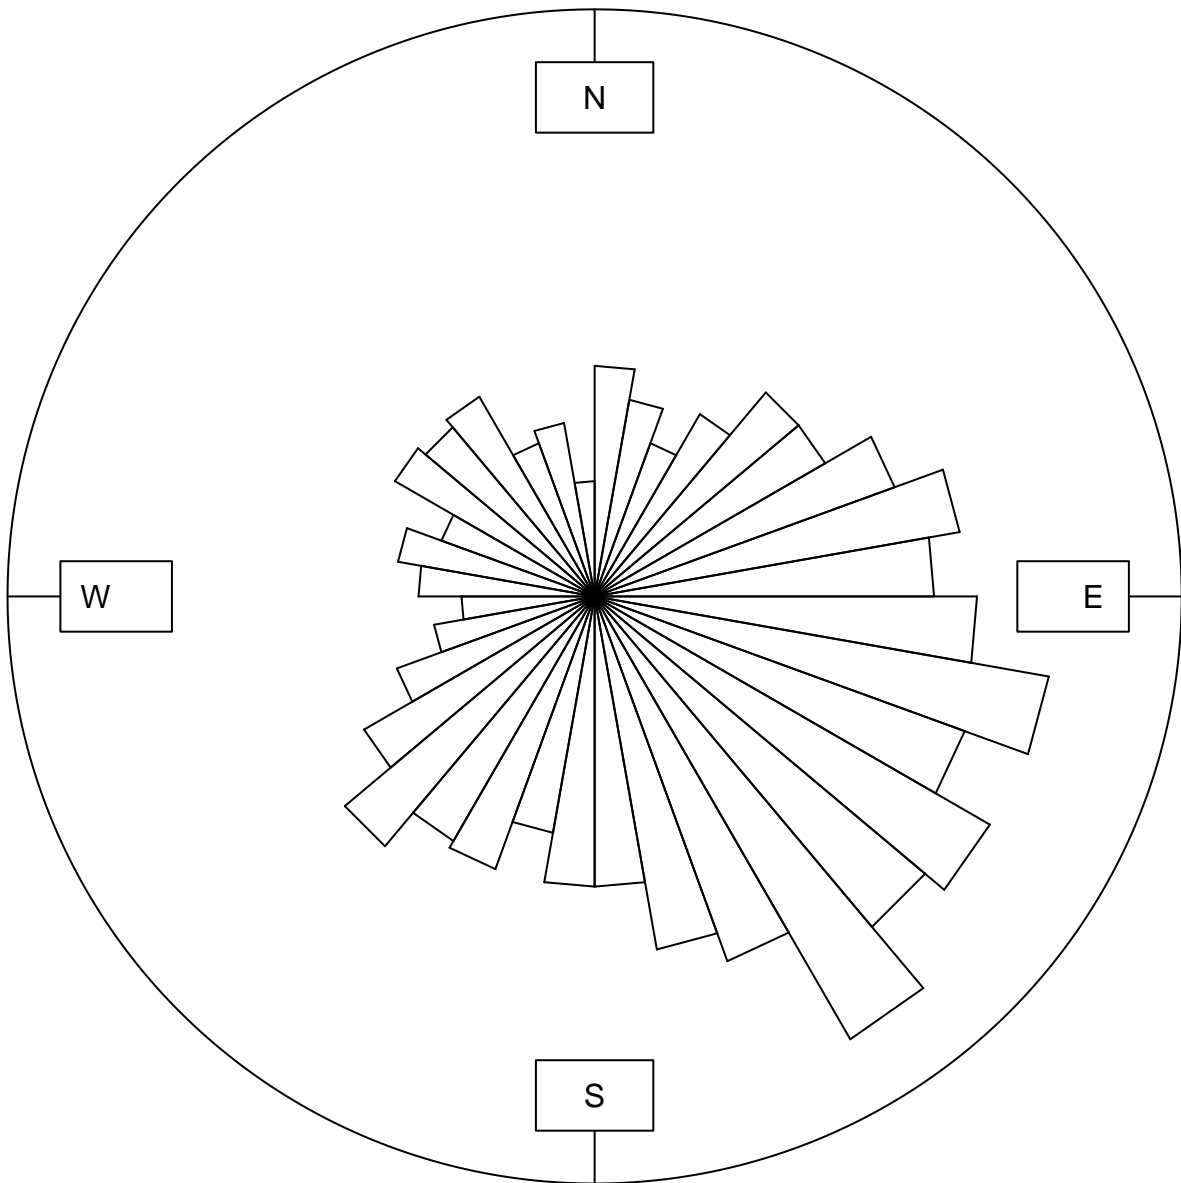

# bootstrap 218

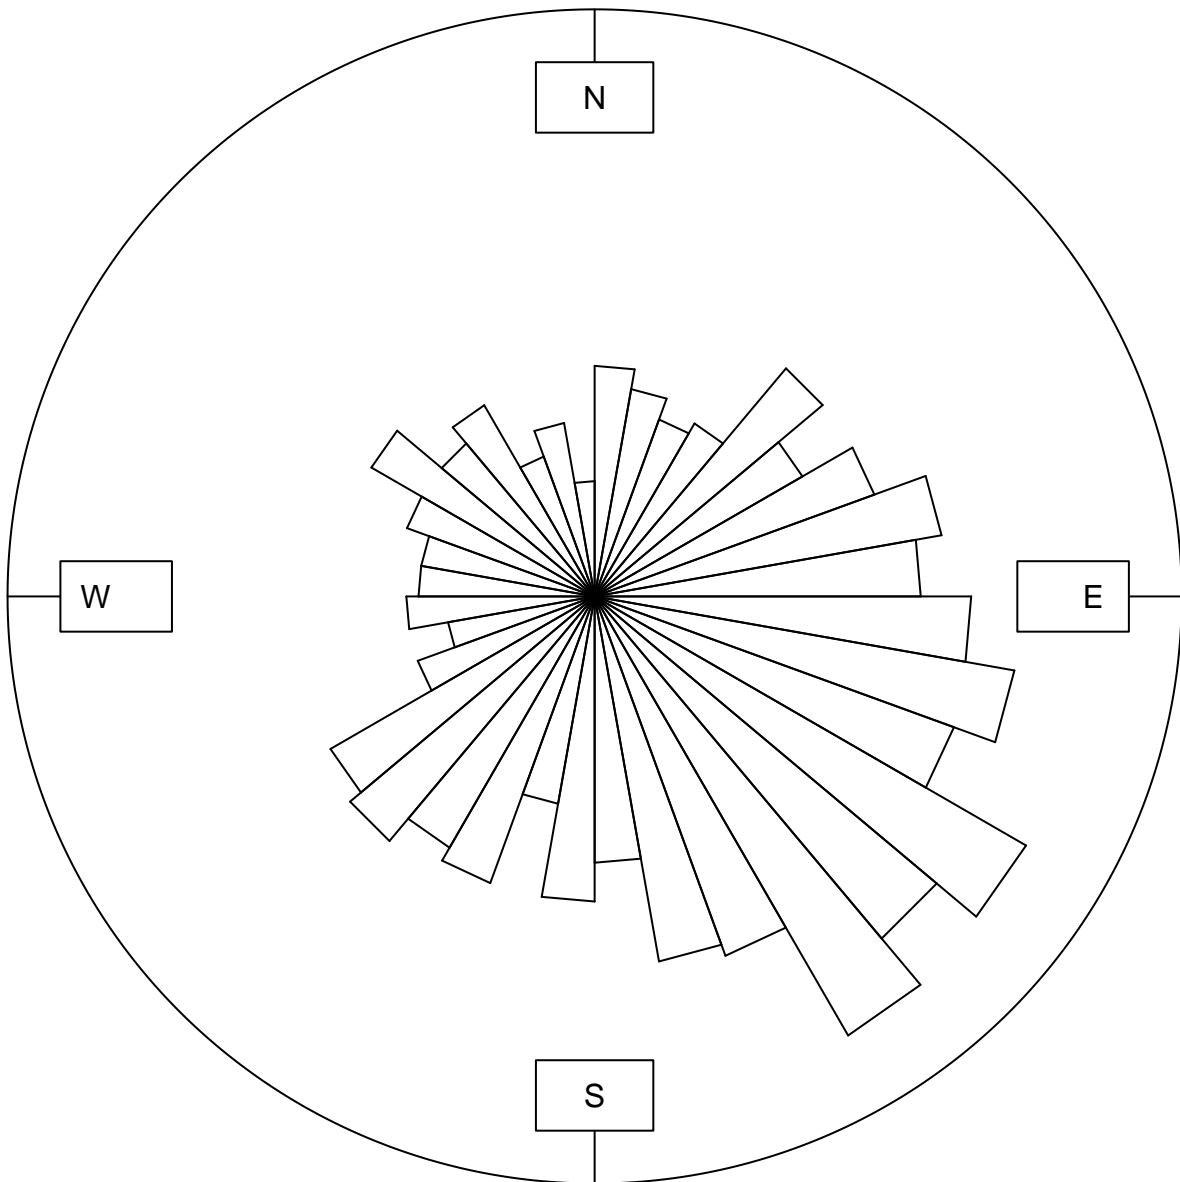

# bootstrap 219

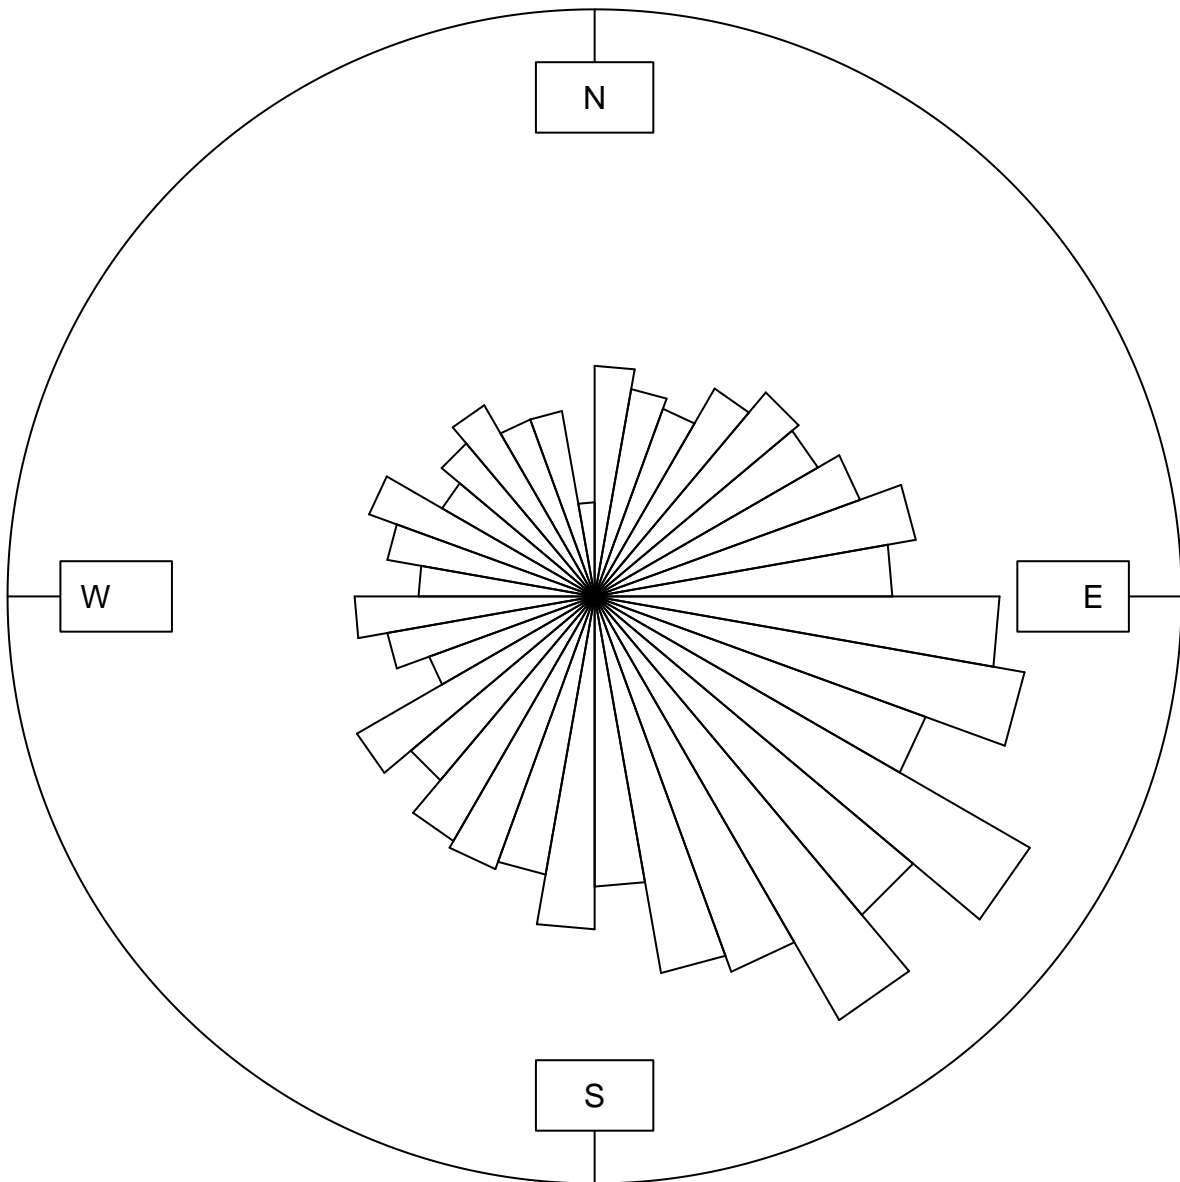

# bootstrap 220

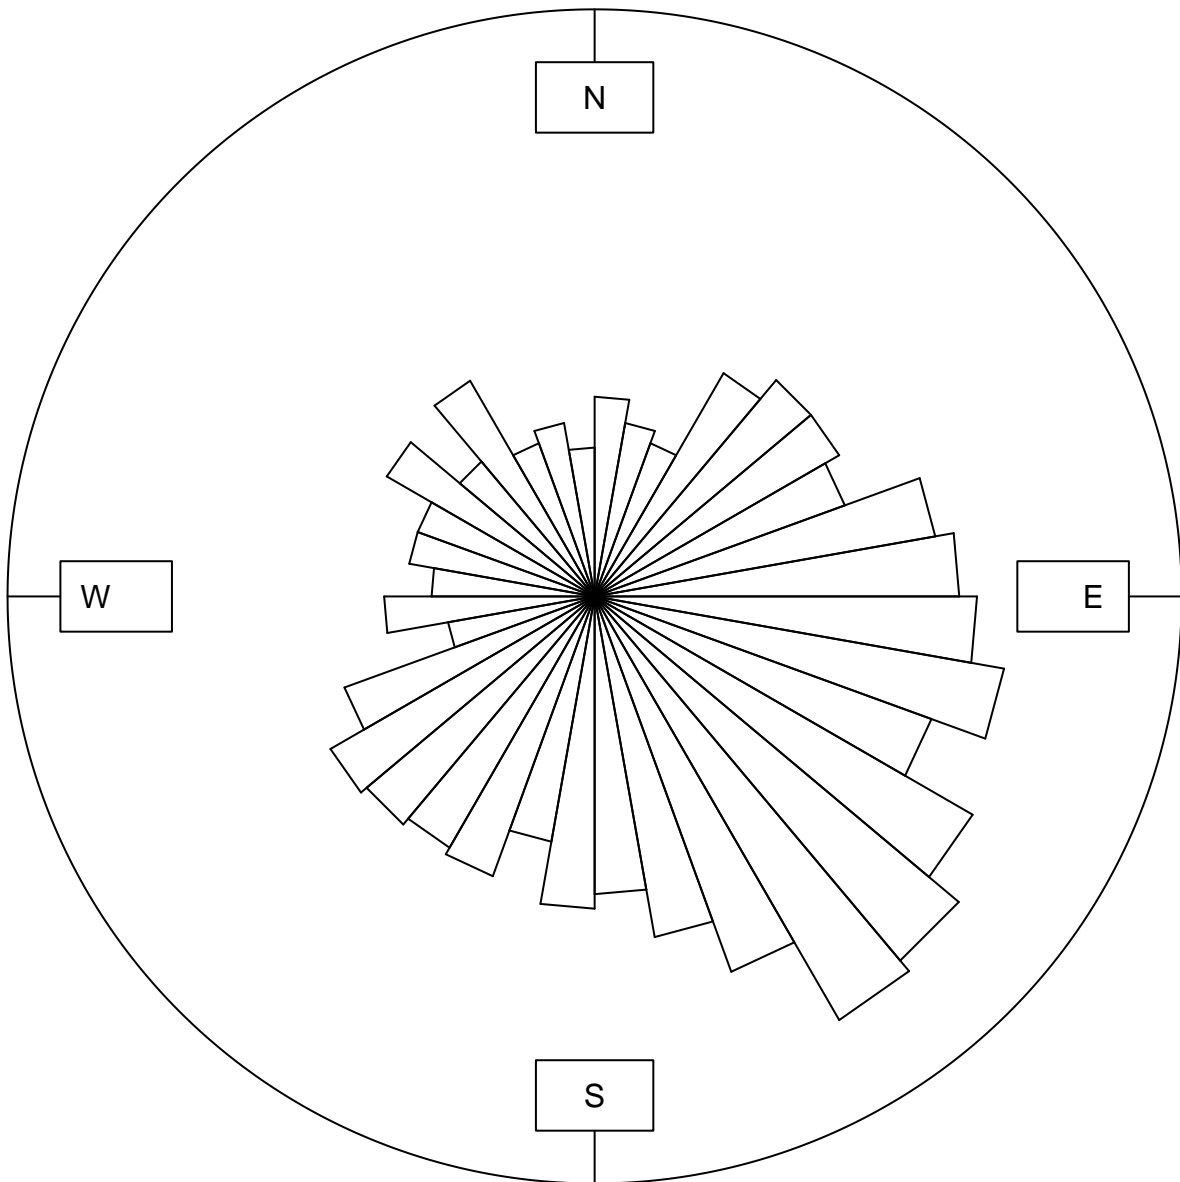

# bootstrap 221

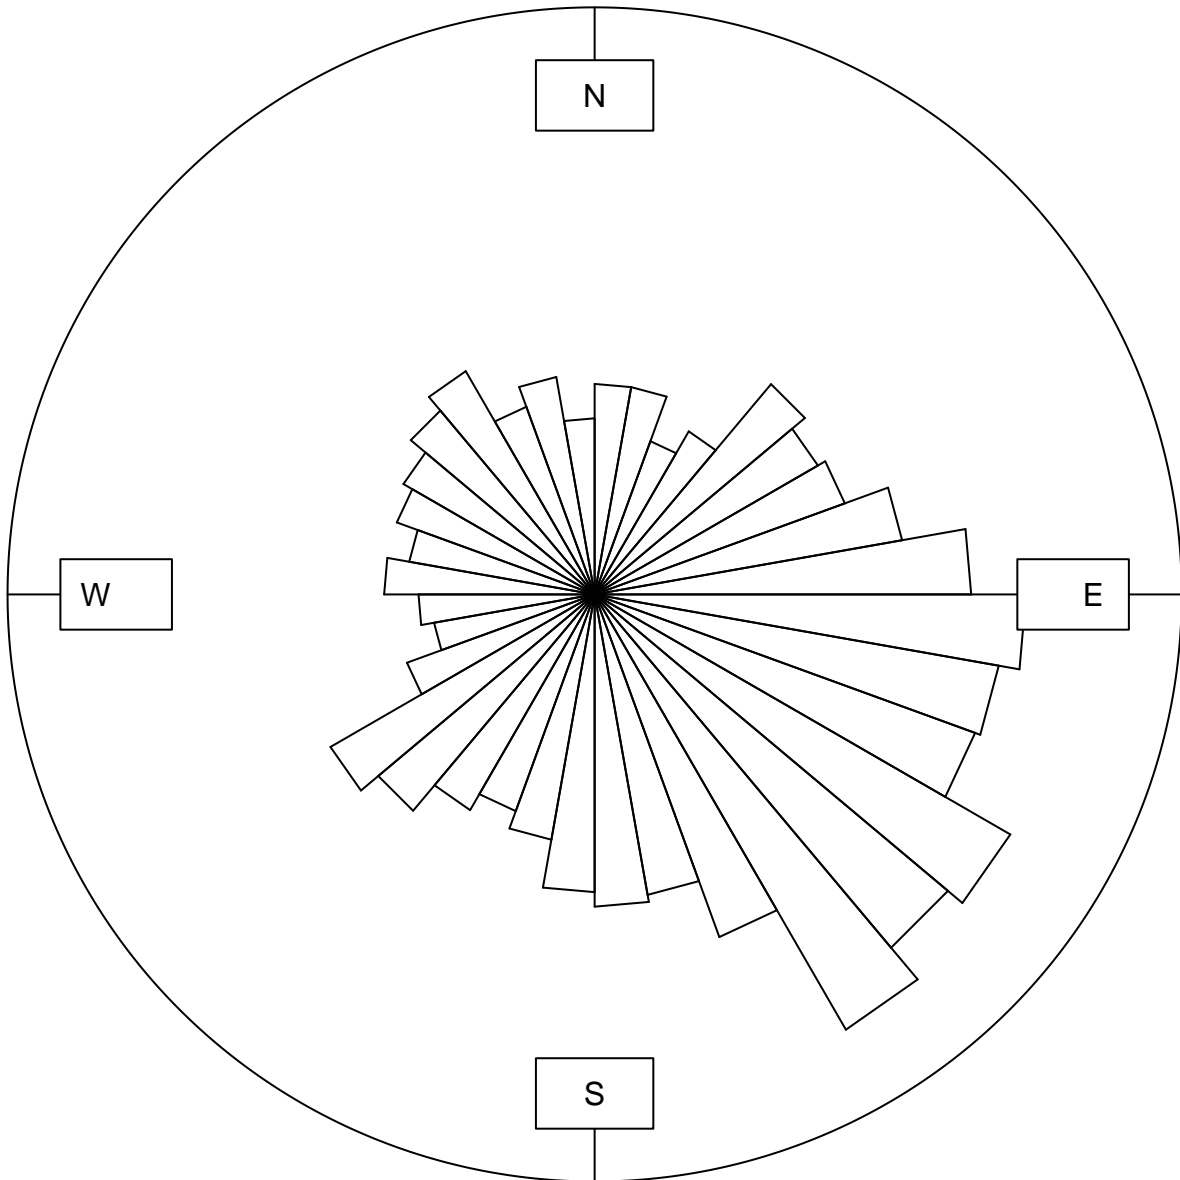

# bootstrap 222

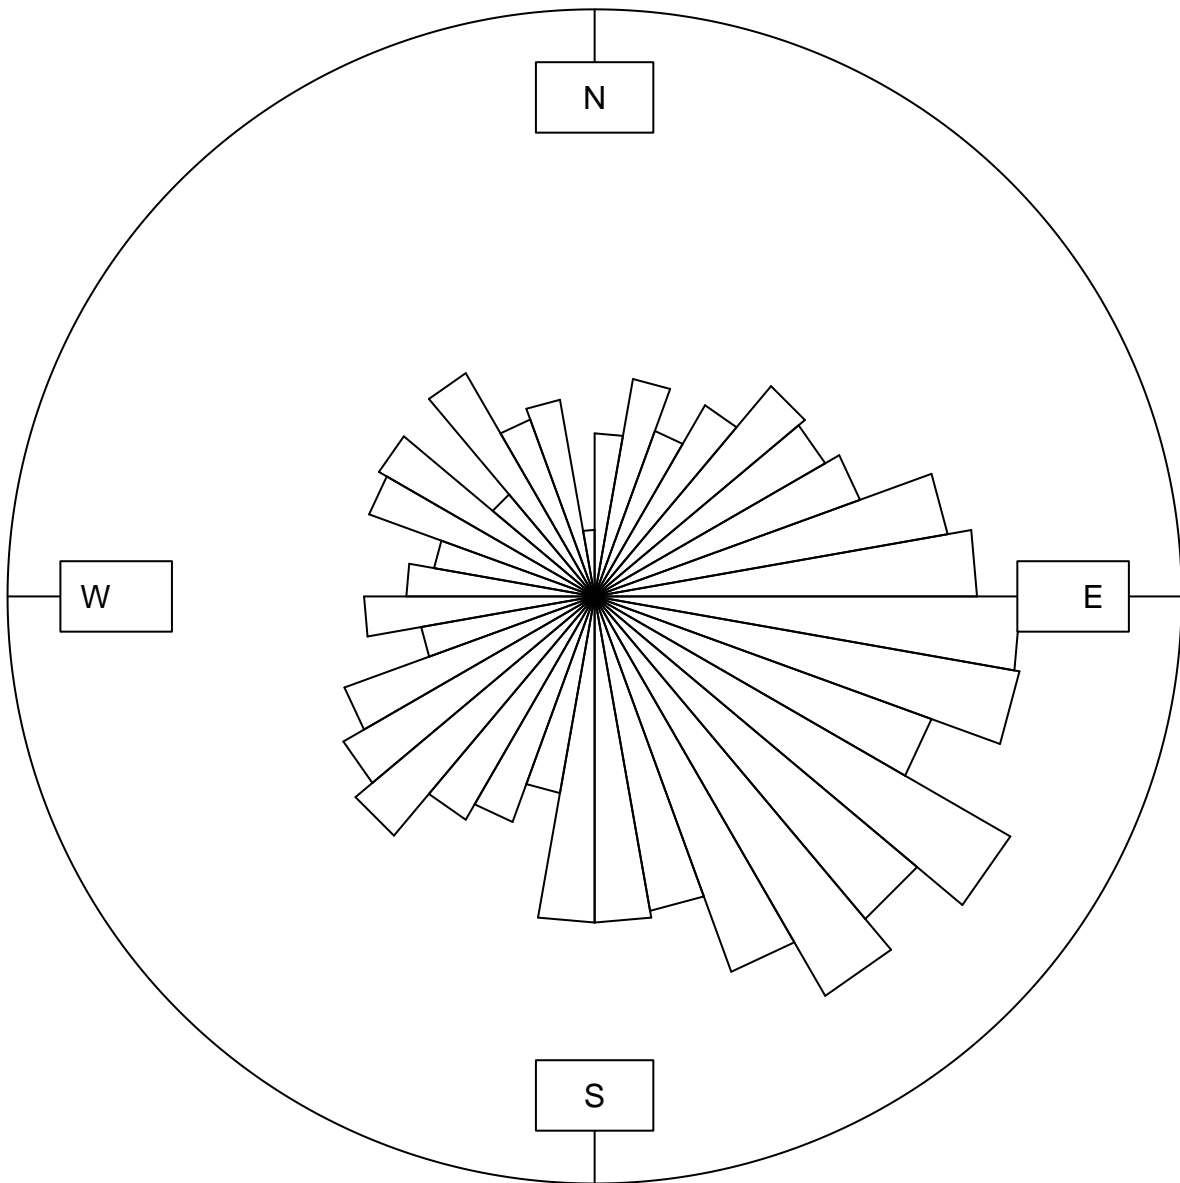

# bootstrap 223

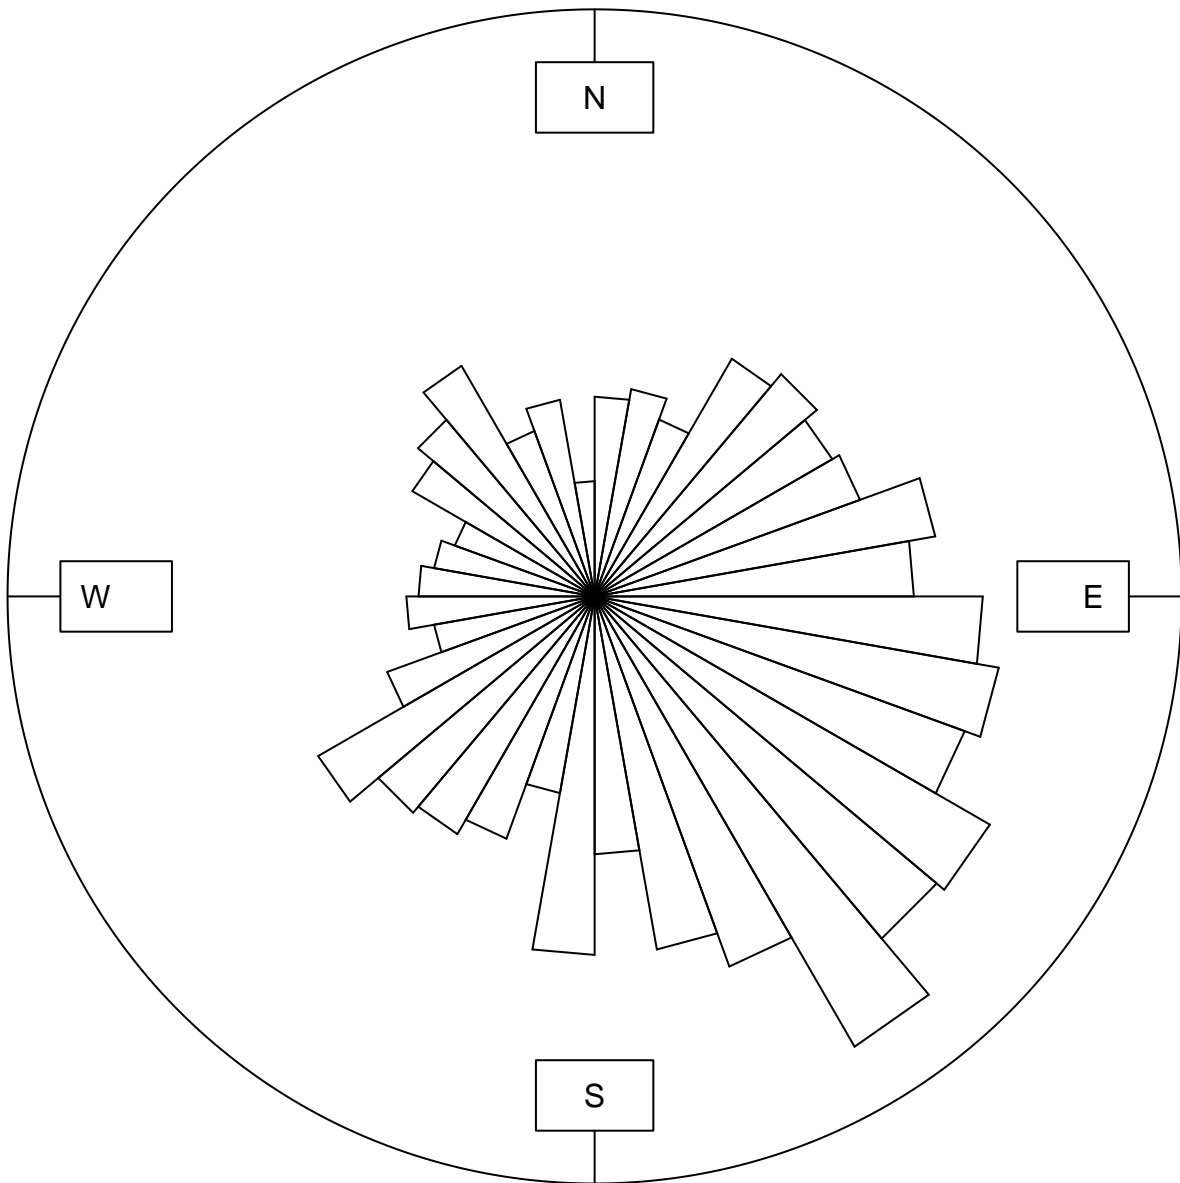

# bootstrap 224

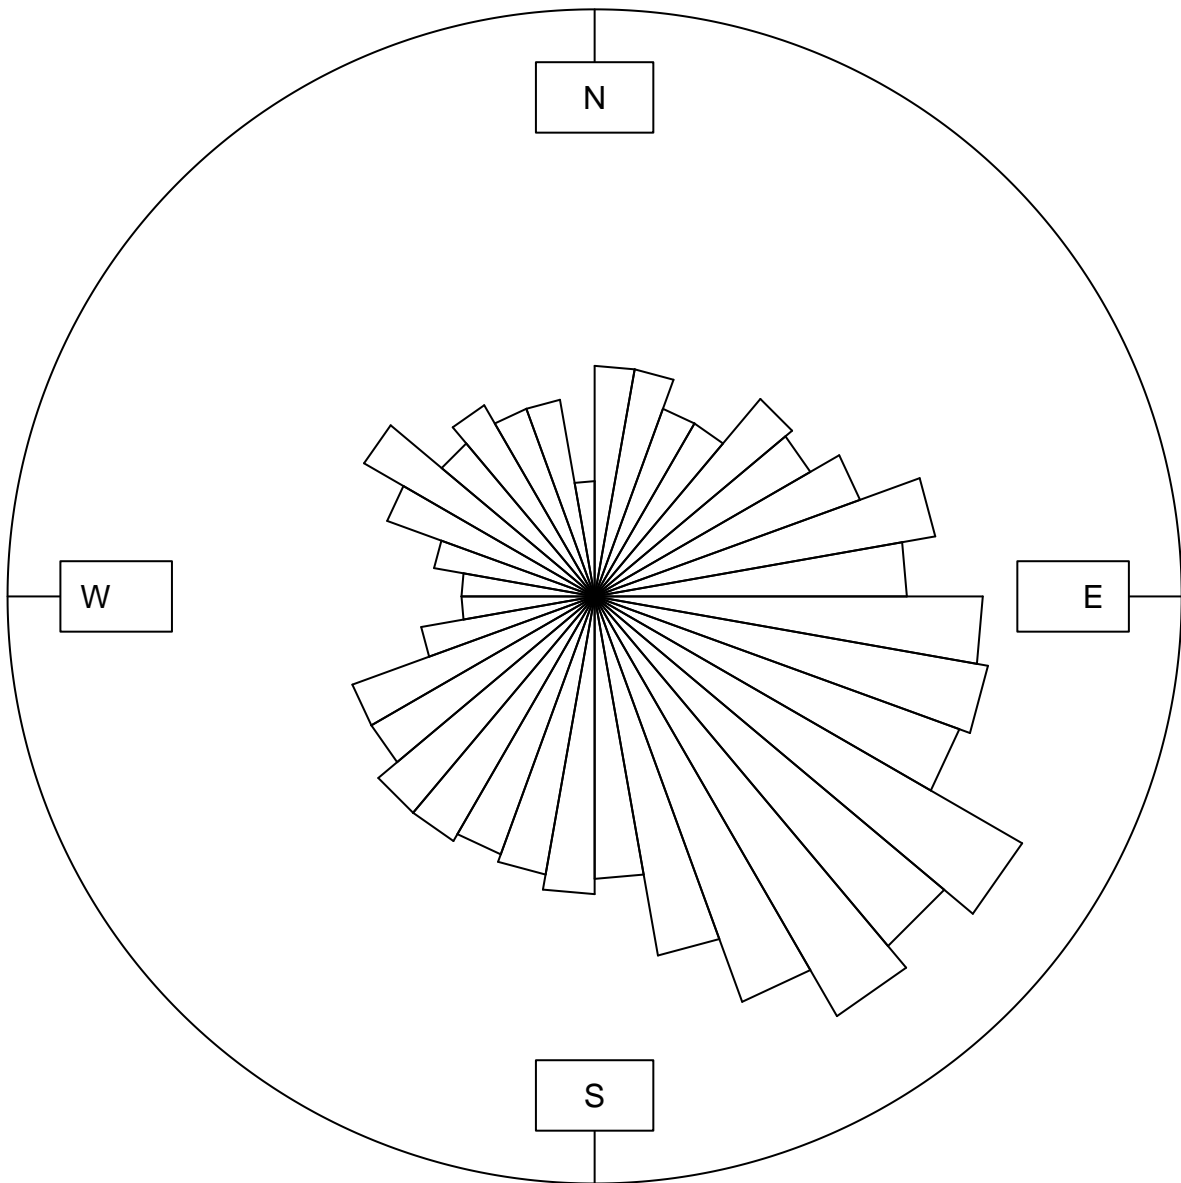



# bootstrap 225

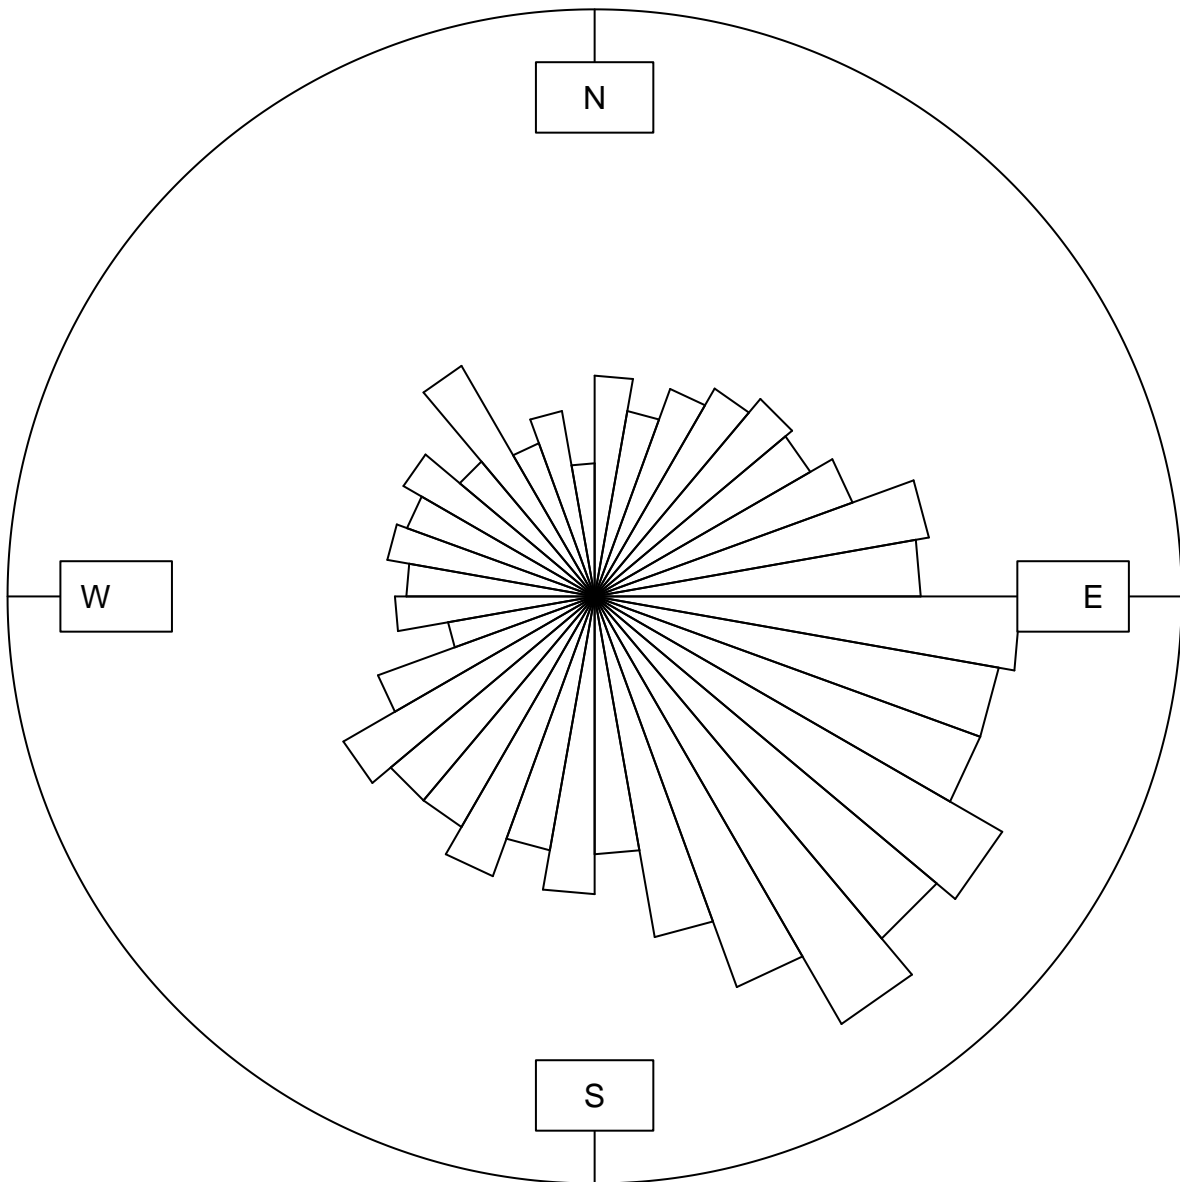

# bootstrap 226

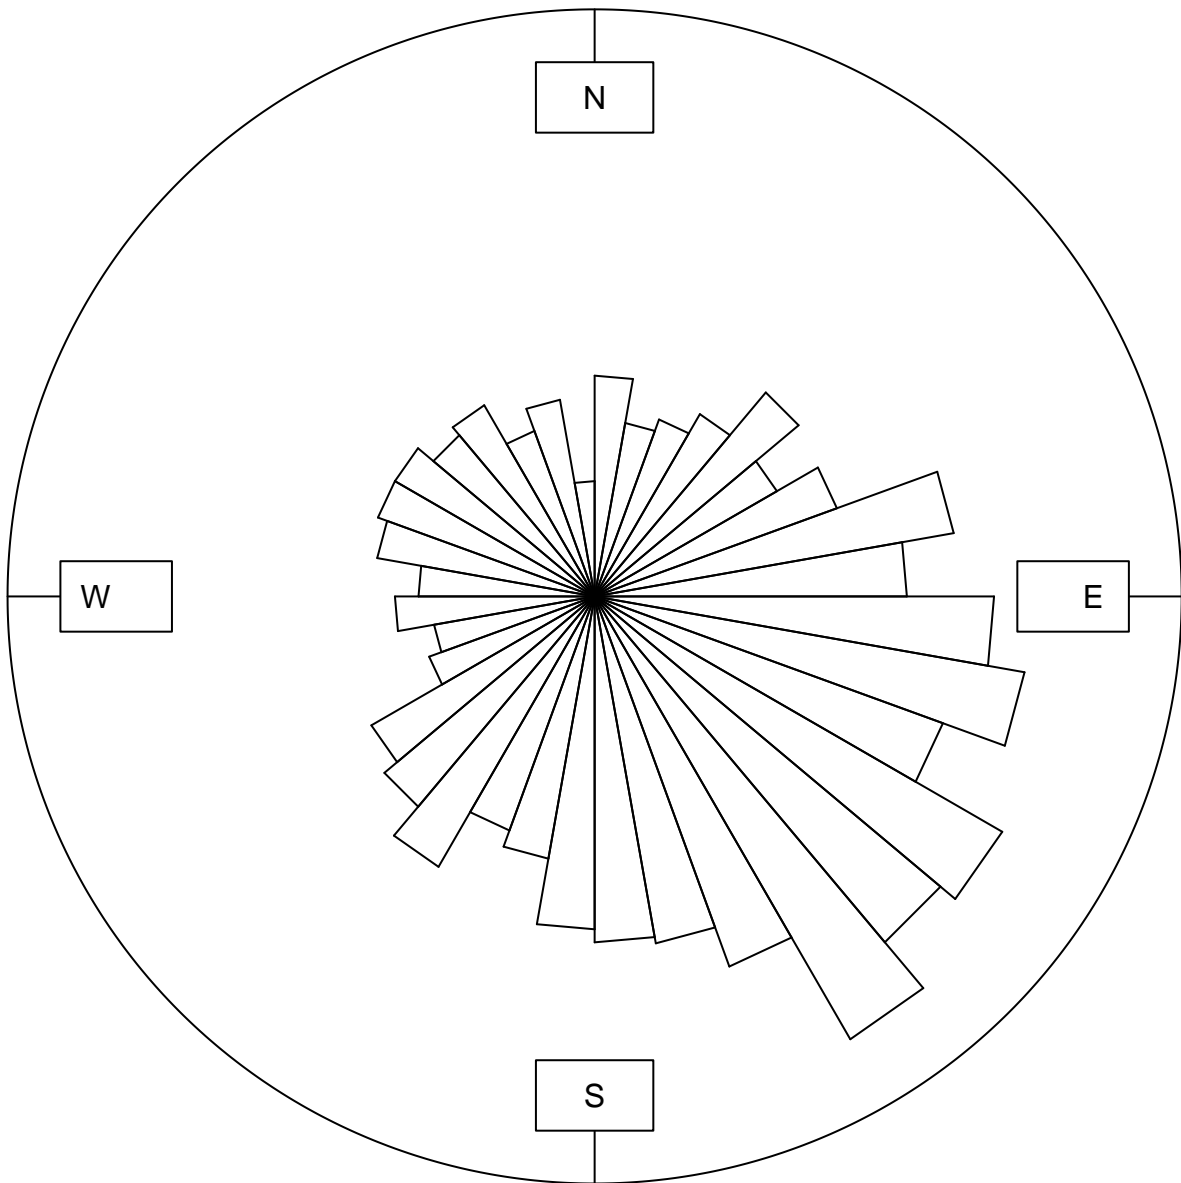

# bootstrap 227

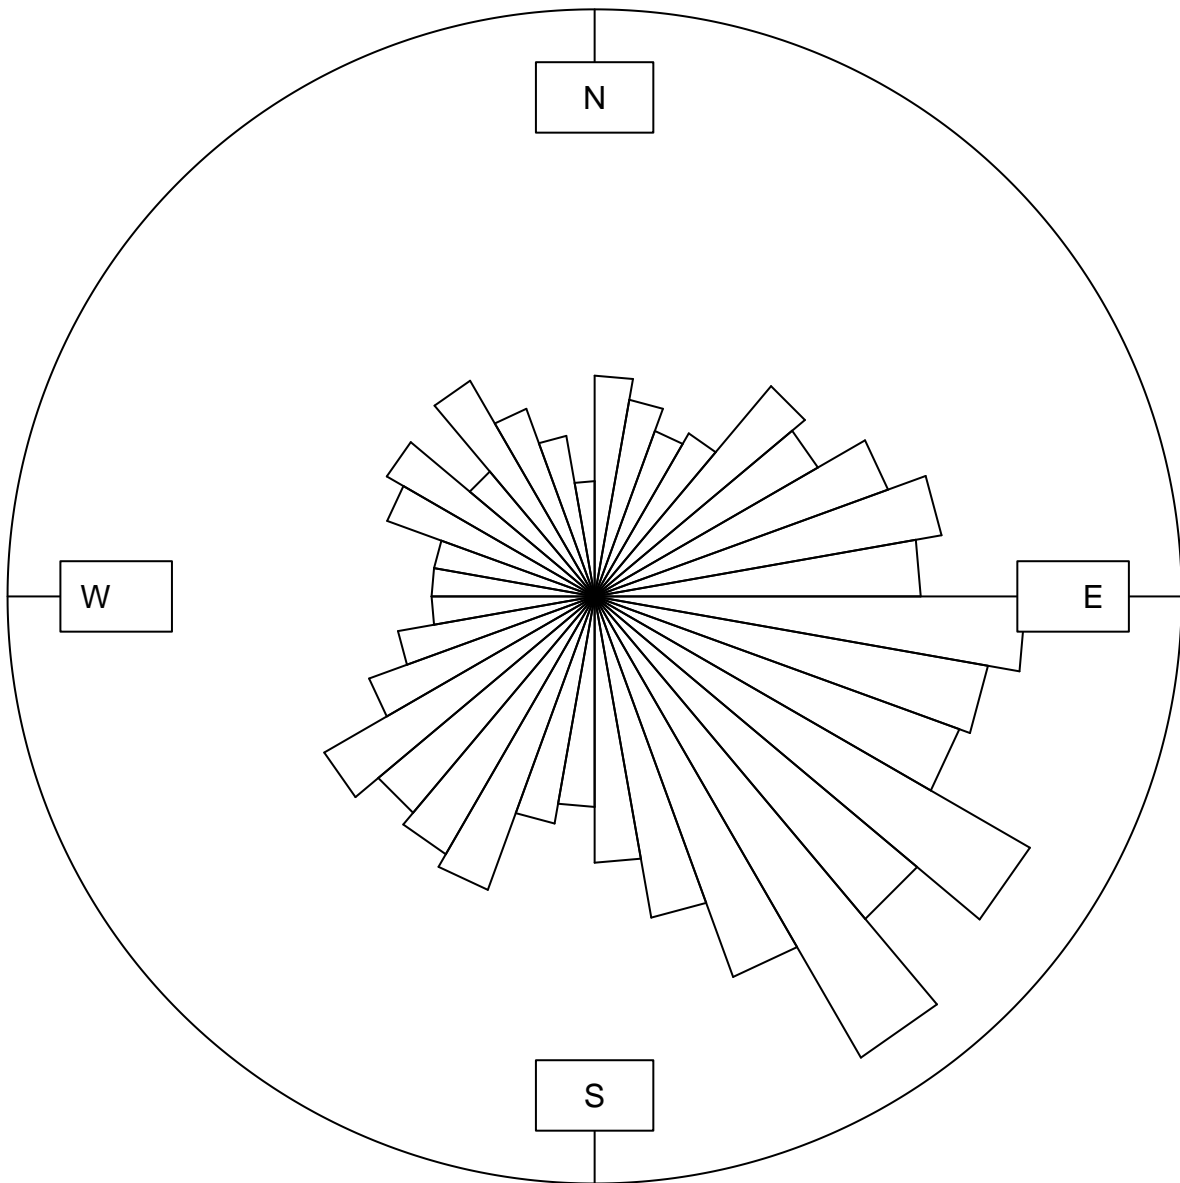

# bootstrap 228

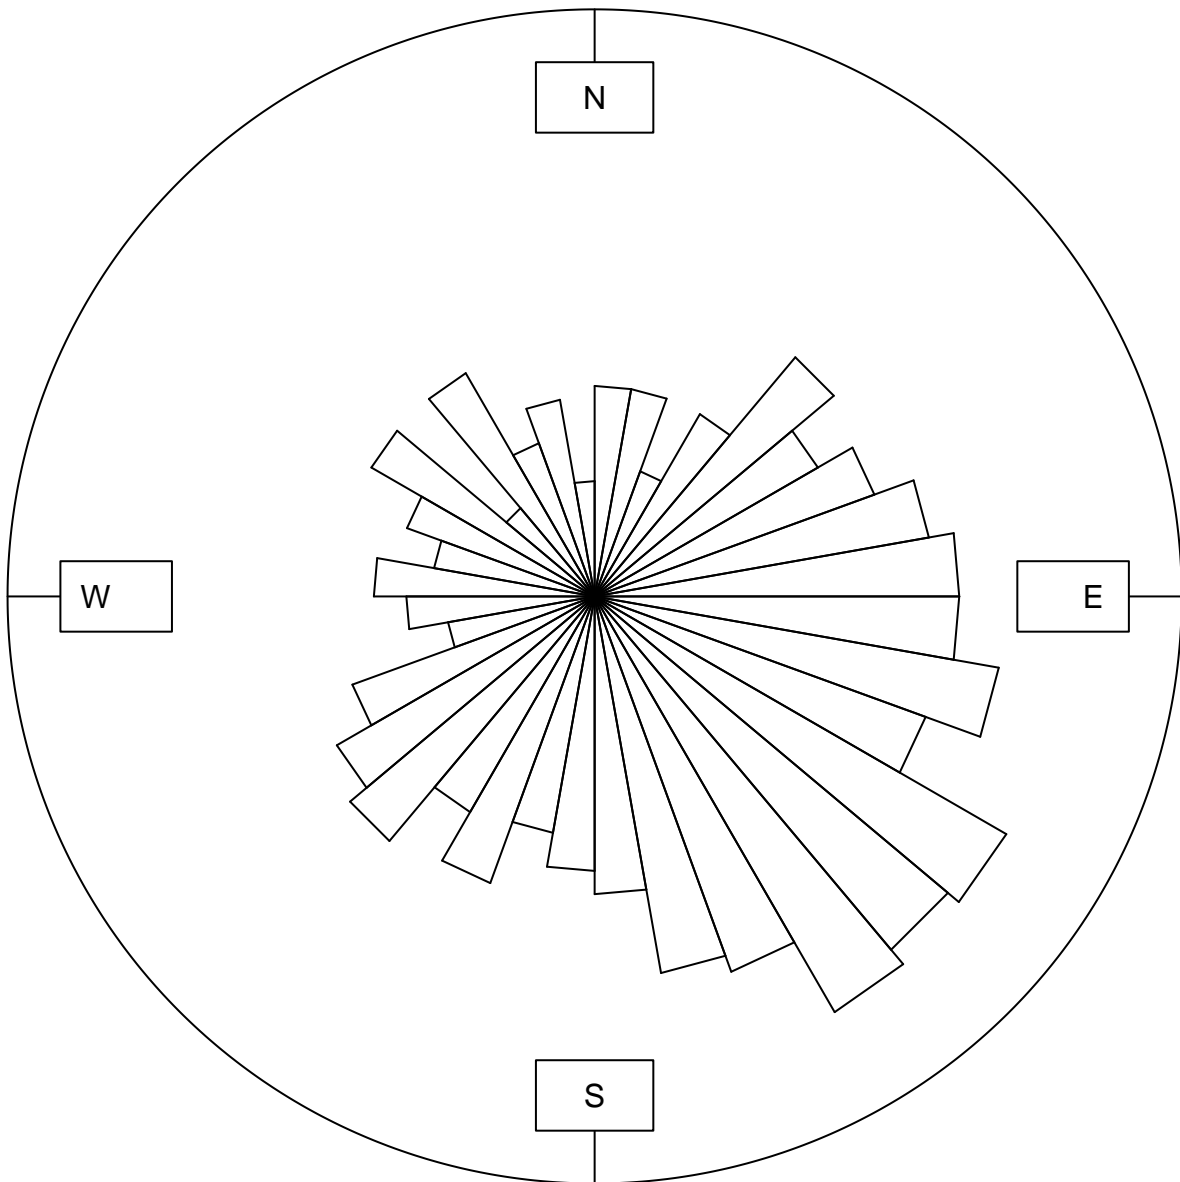

# bootstrap 229

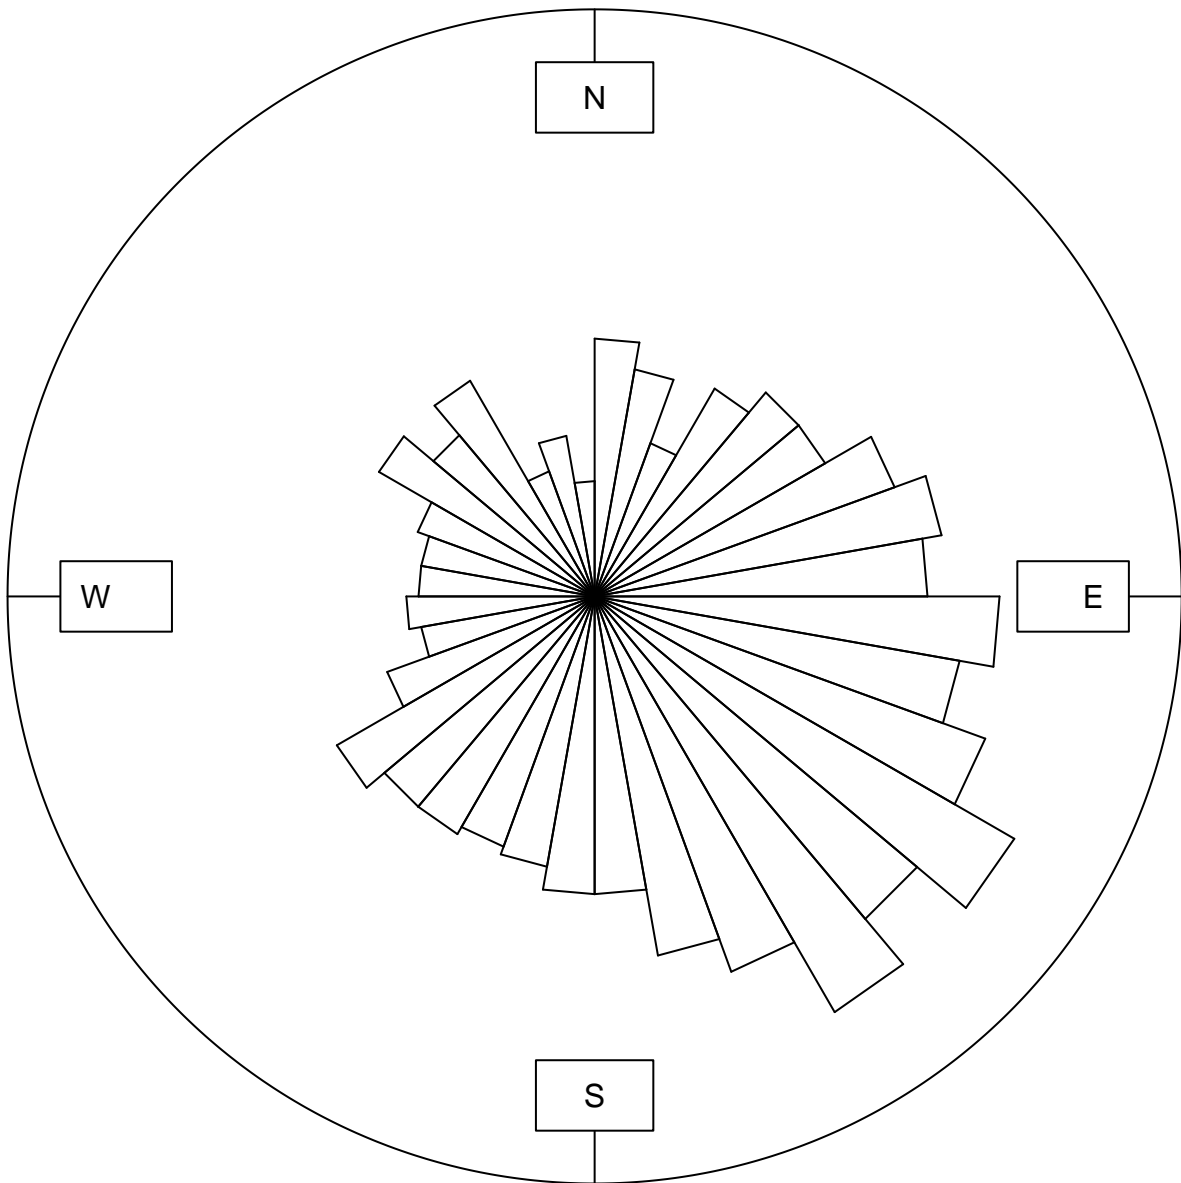

# bootstrap 230

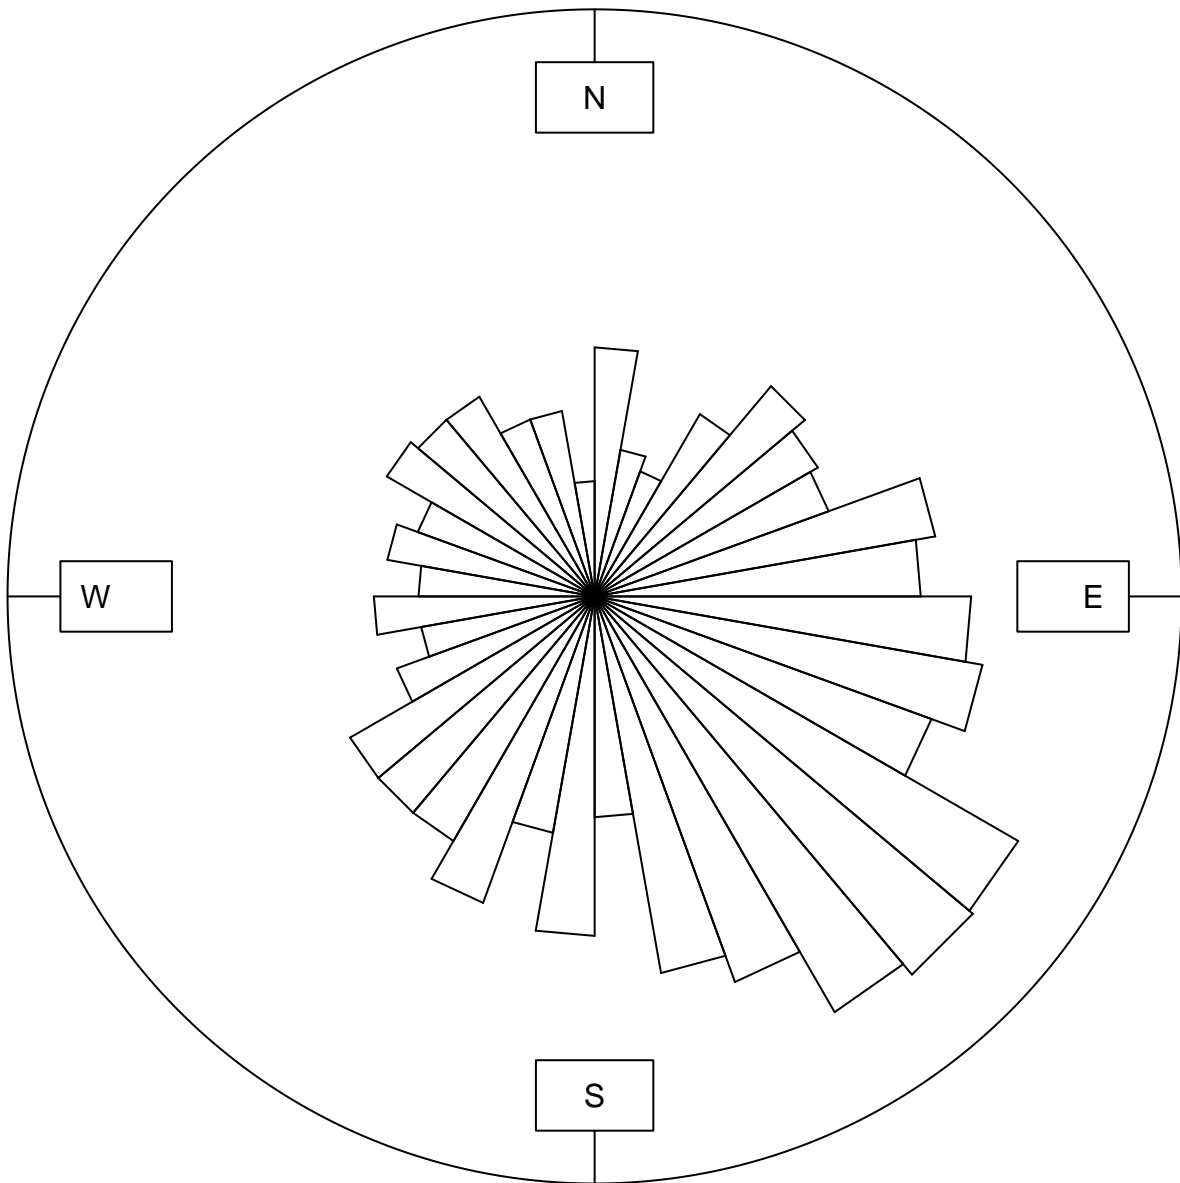

# bootstrap 231

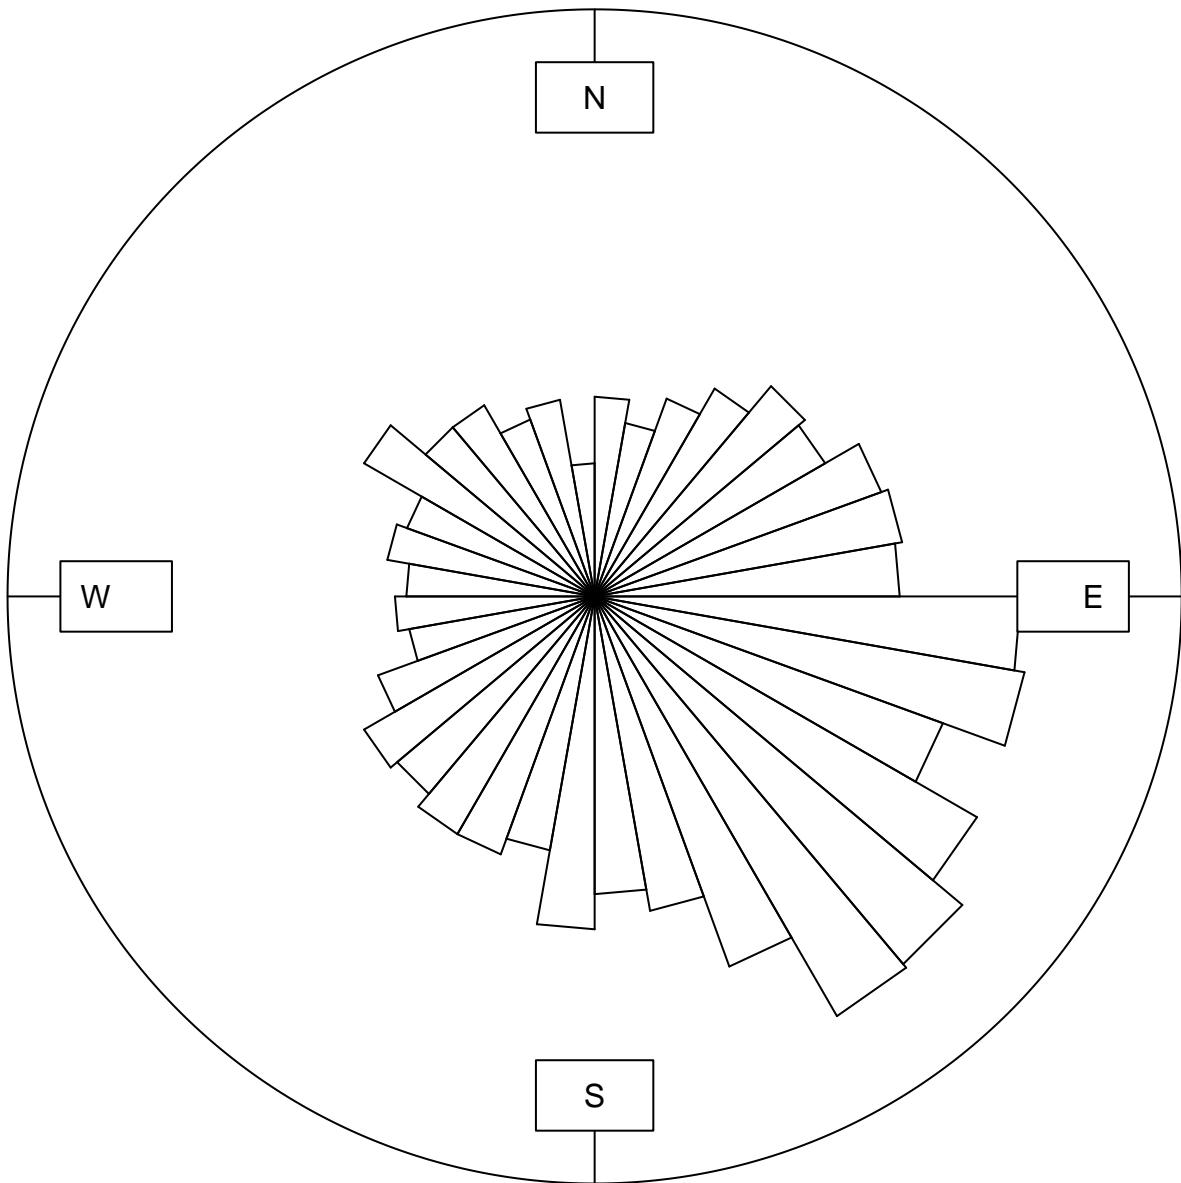

# bootstrap 232

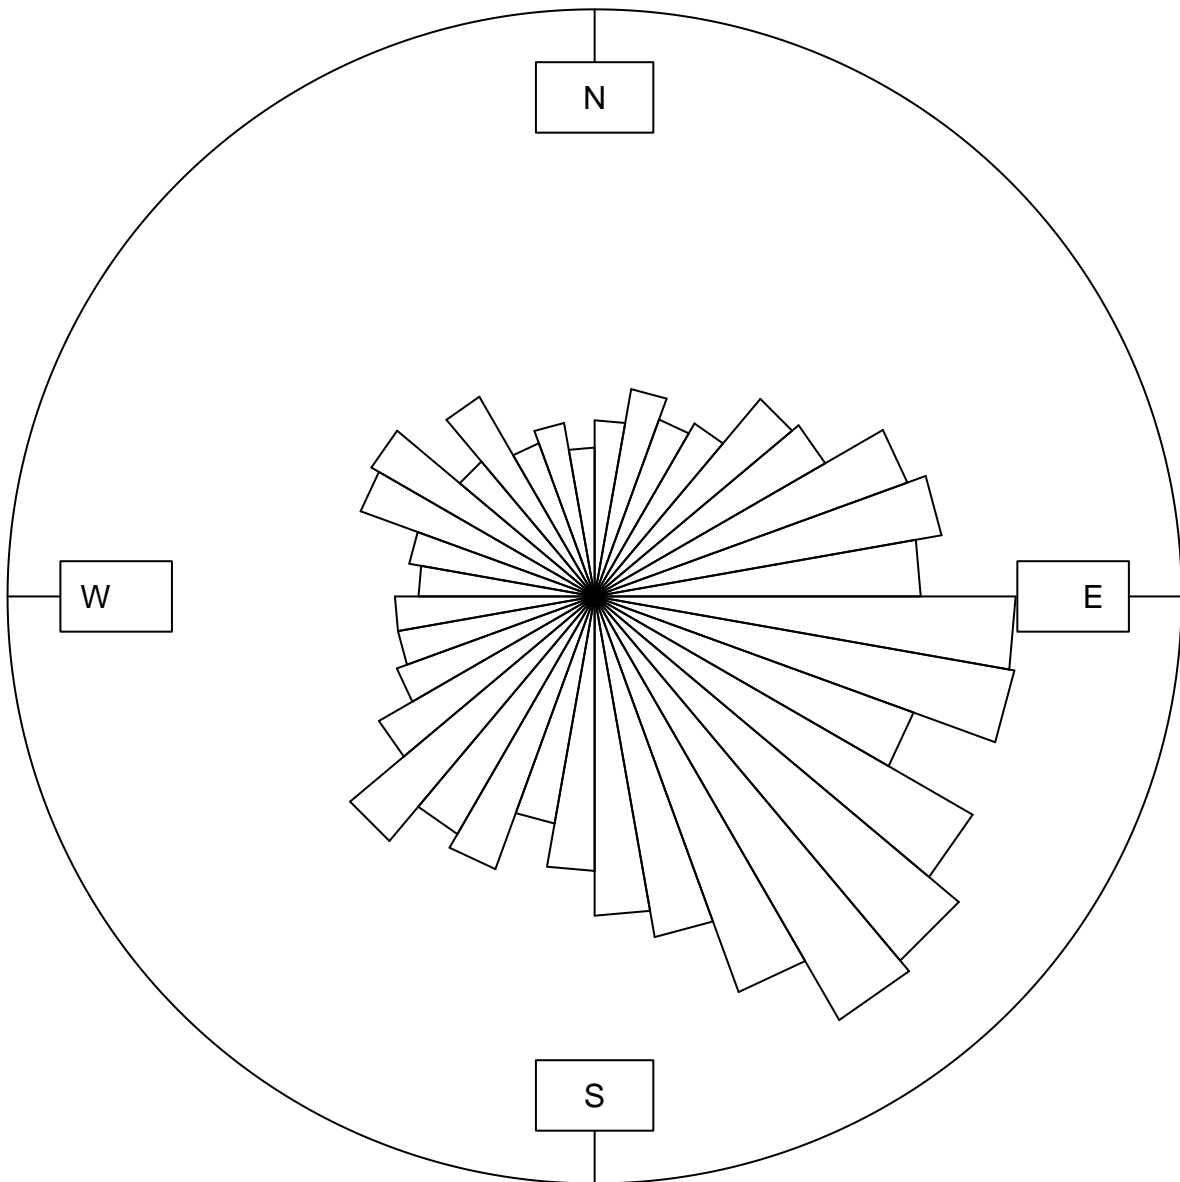



# bootstrap 233

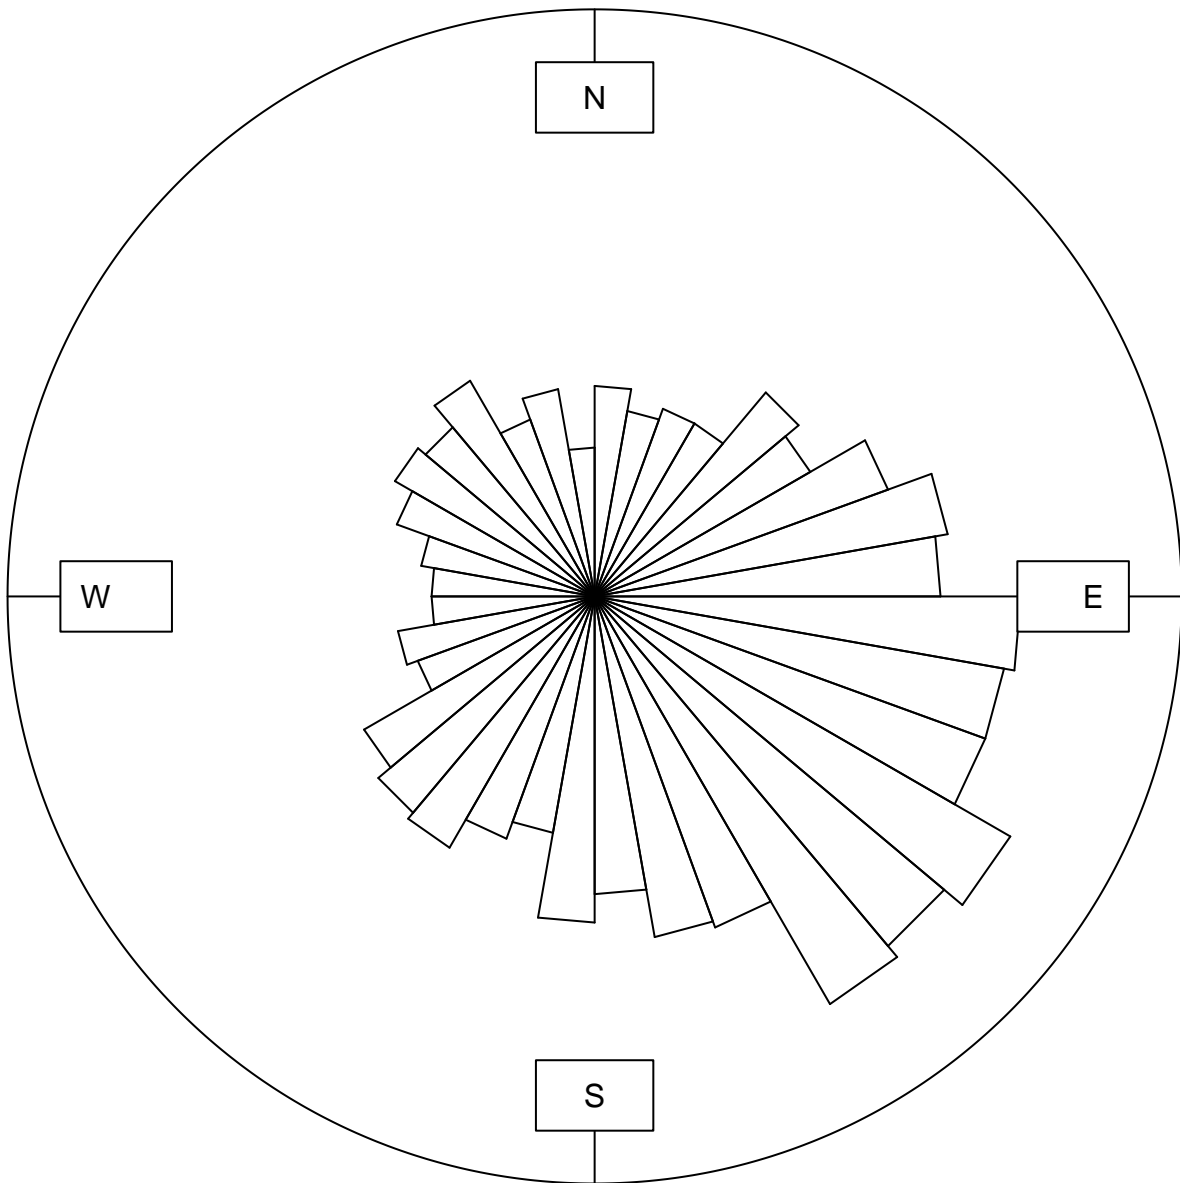

# bootstrap 234

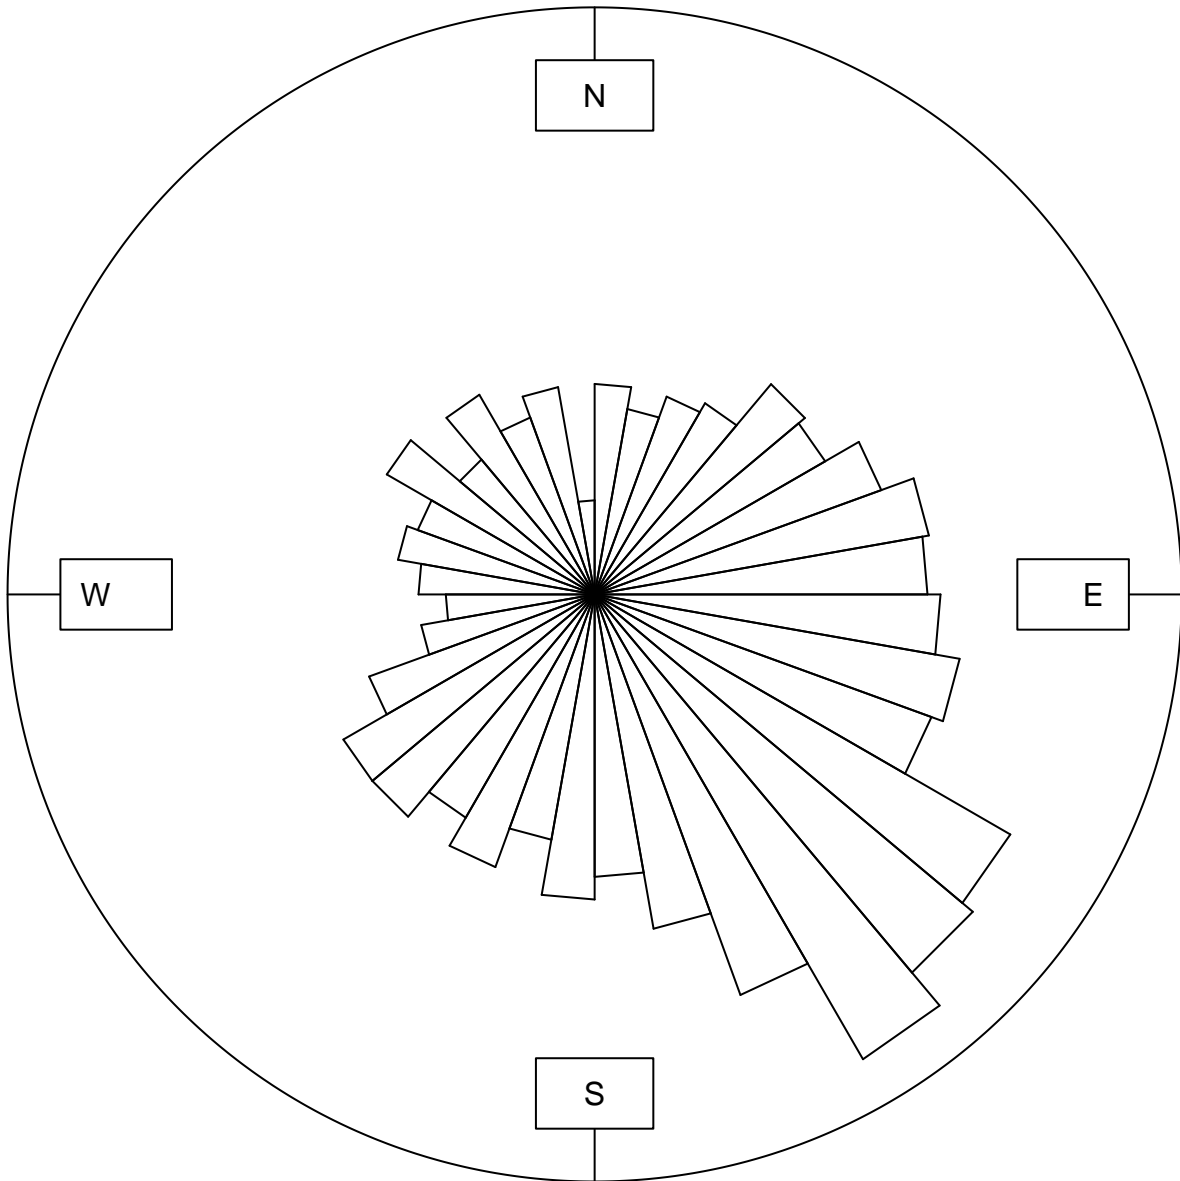

**bootstrap 235**

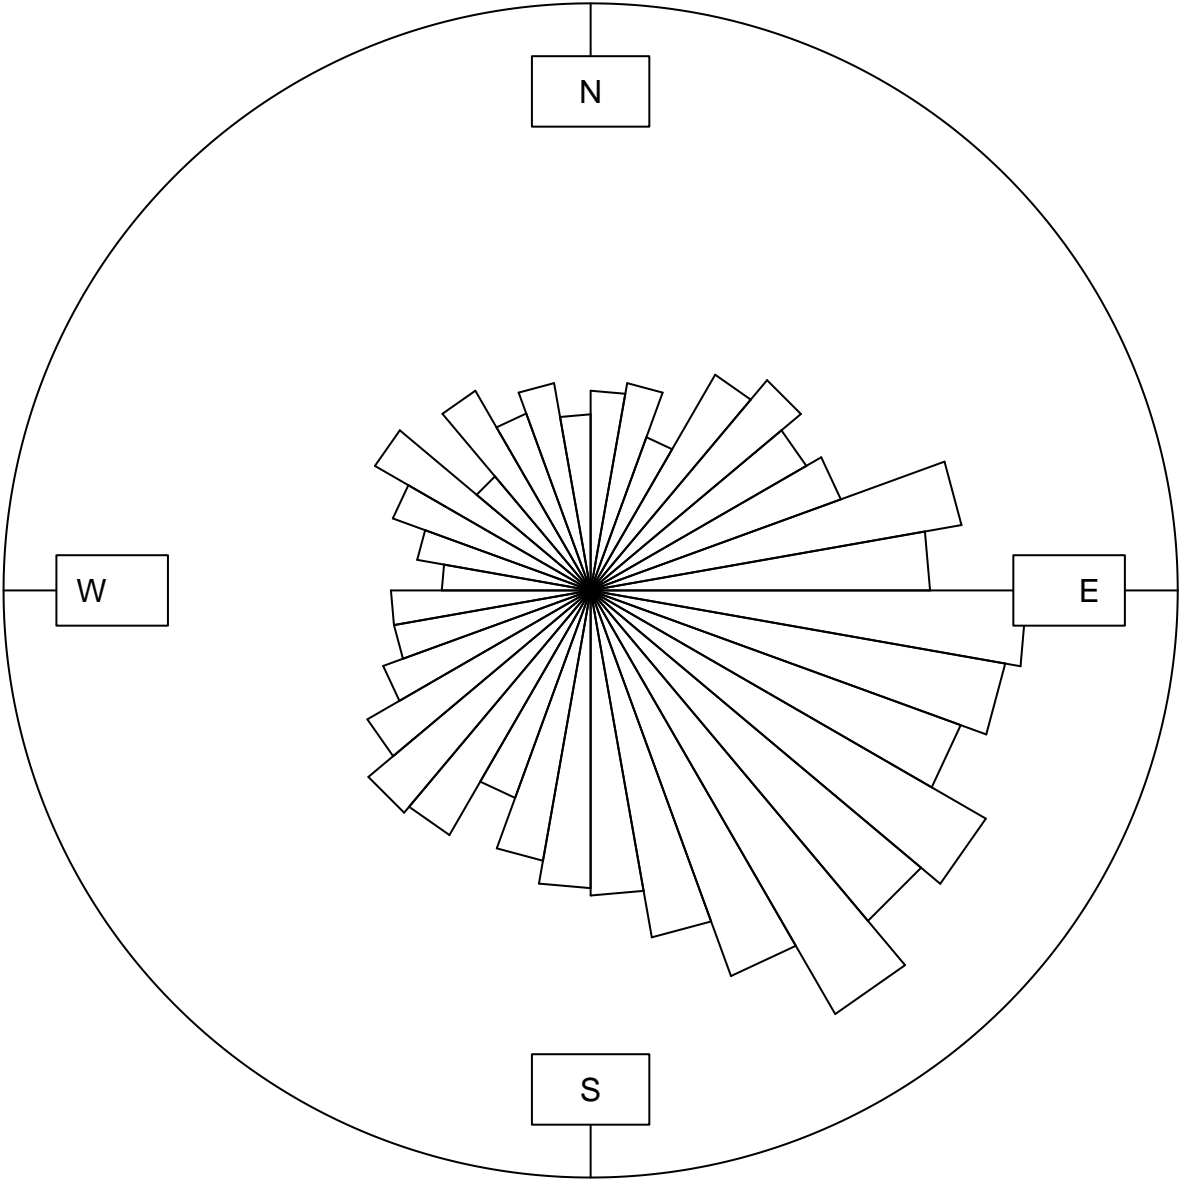

# bootstrap 236

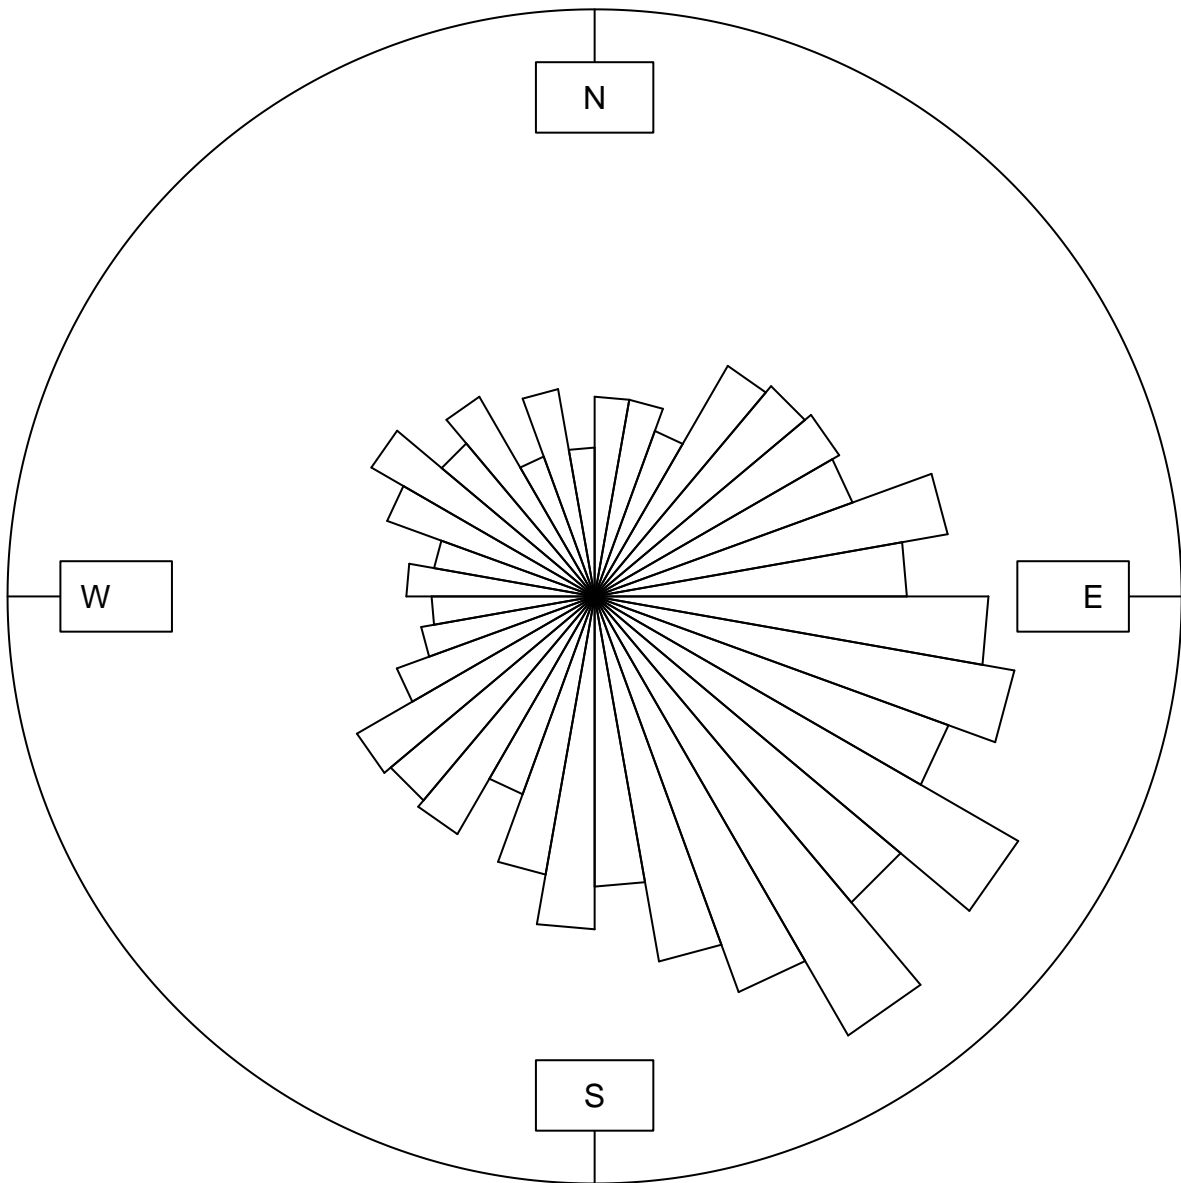

# bootstrap 237

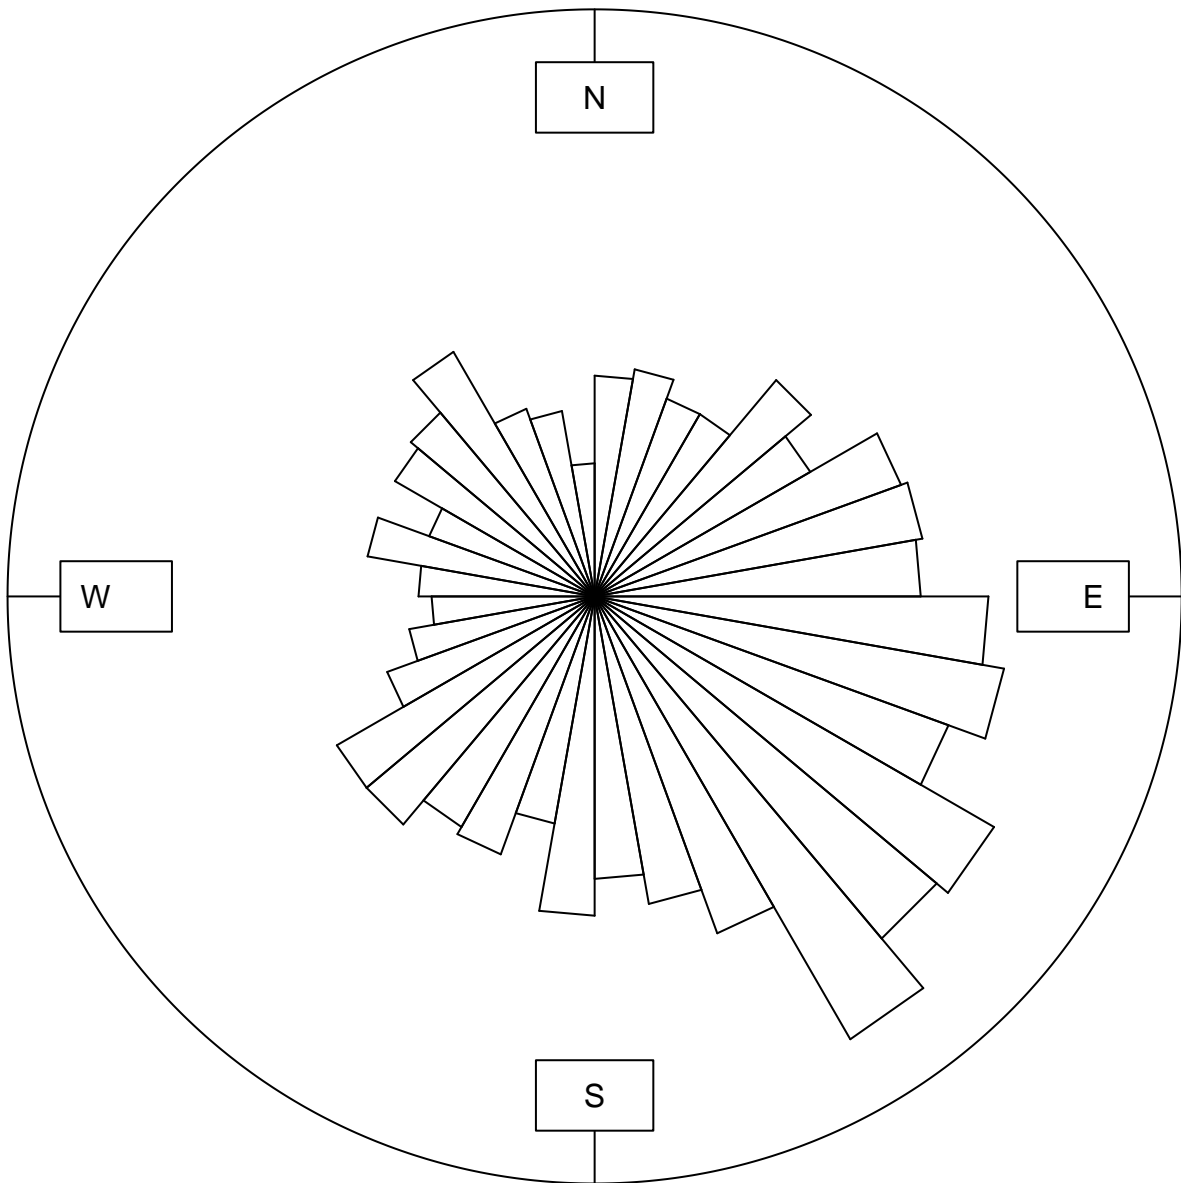

# bootstrap 238

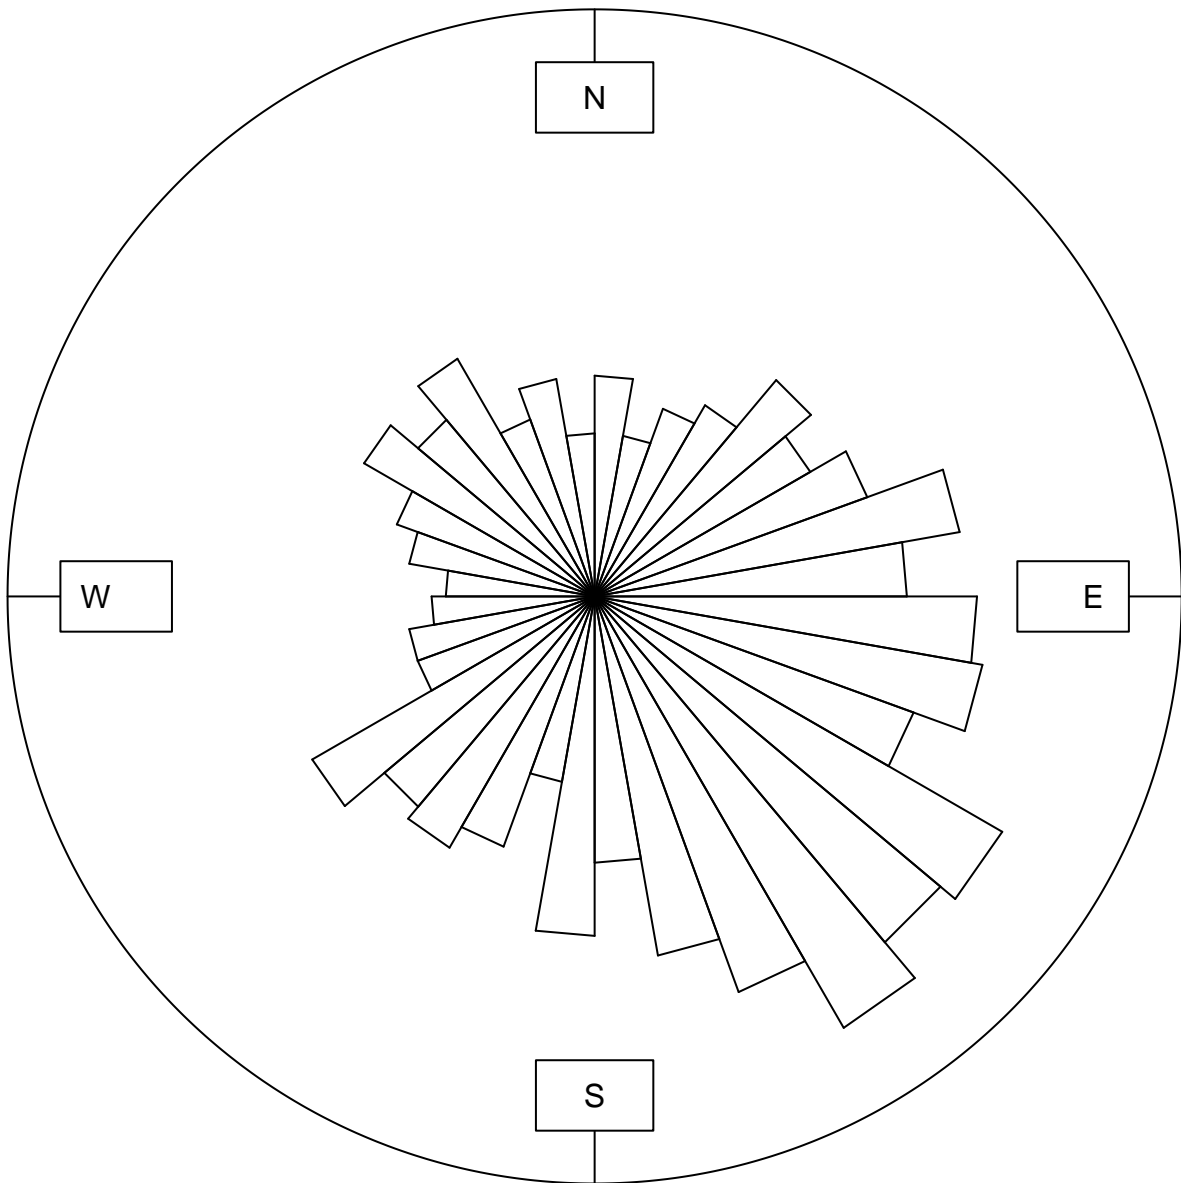

# bootstrap 239

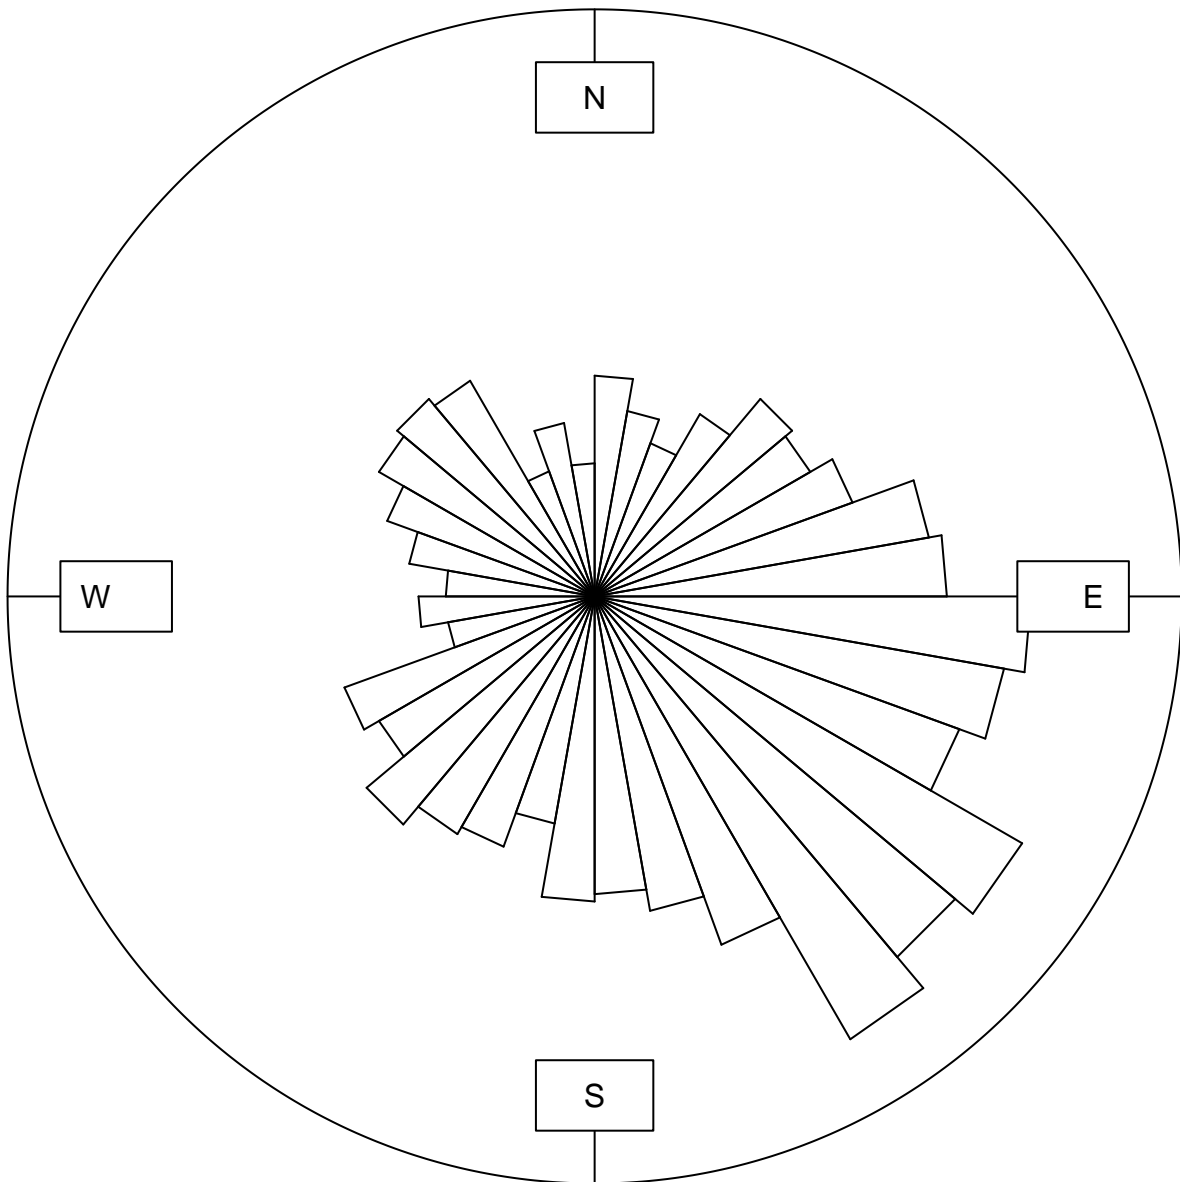

# bootstrap 240

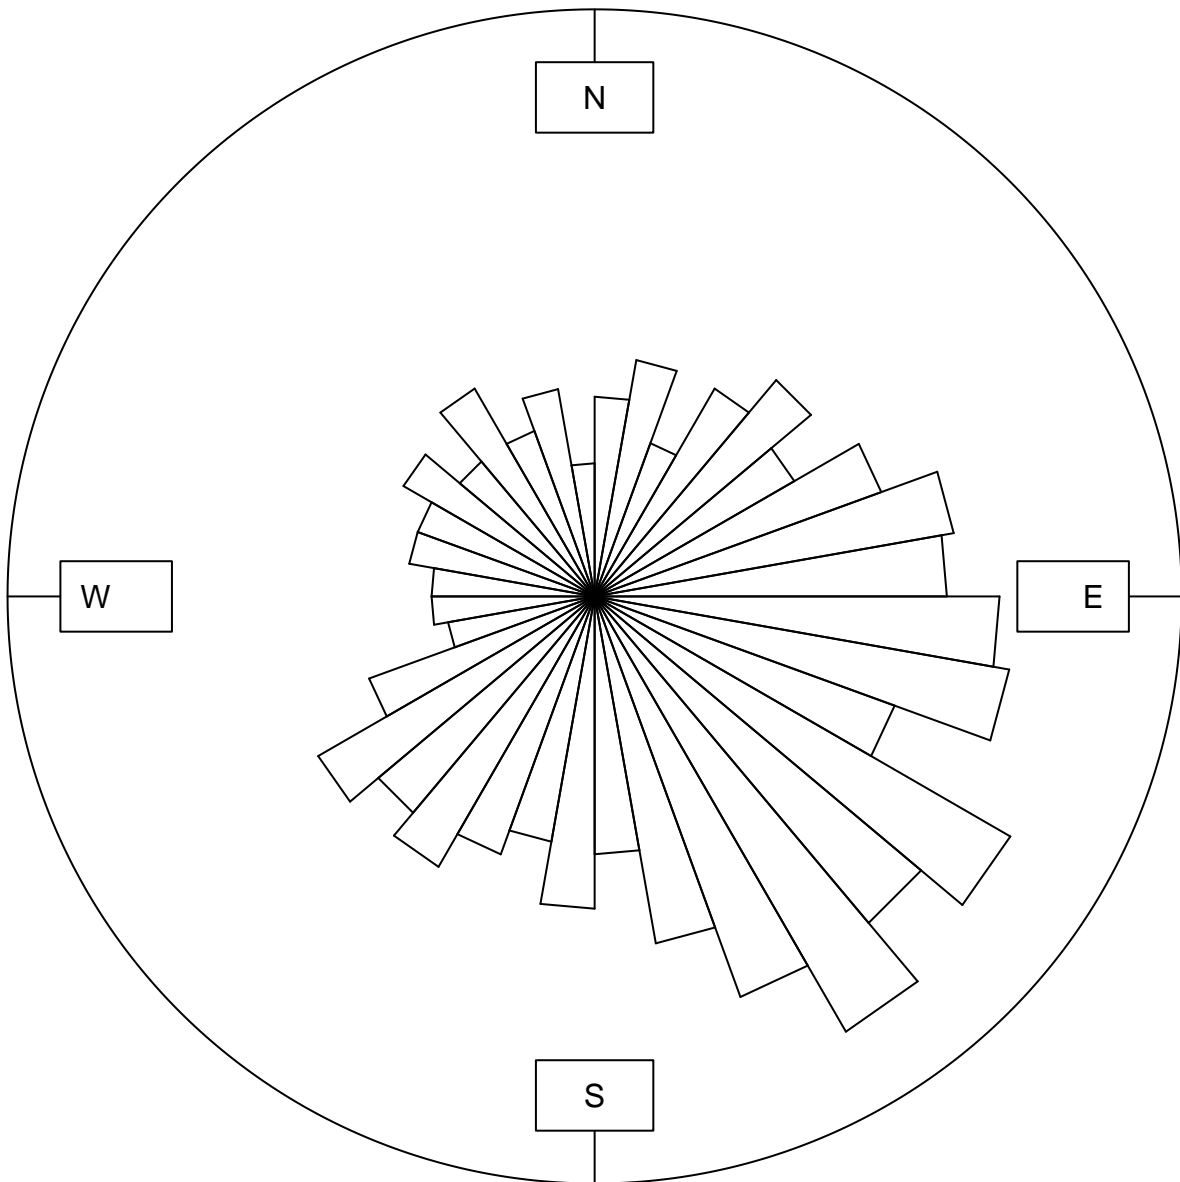



# bootstrap 241

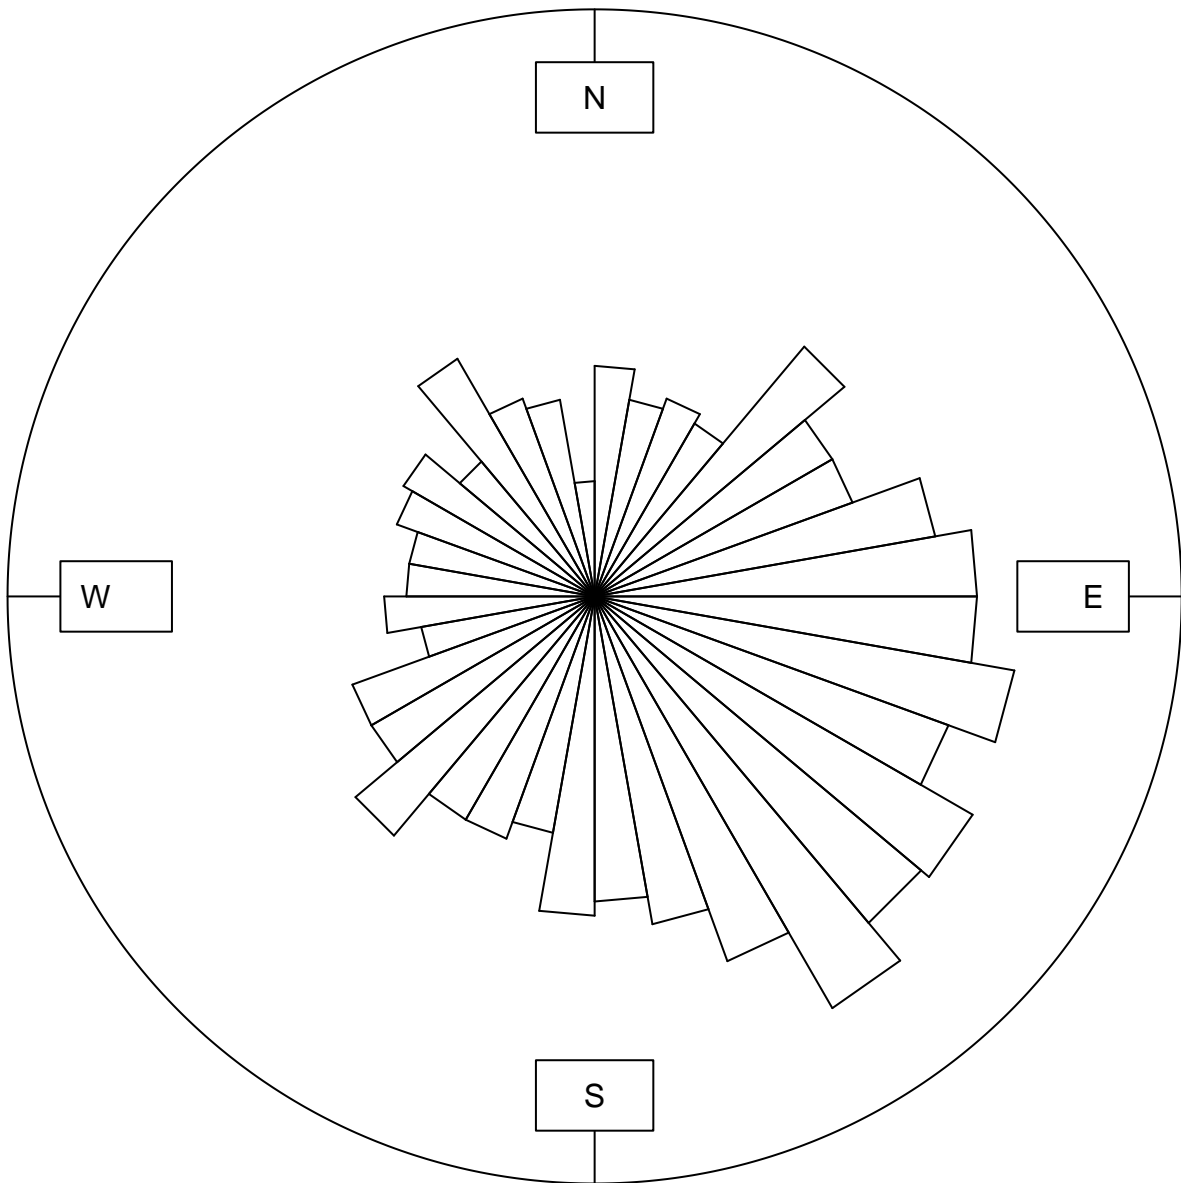

# bootstrap 242

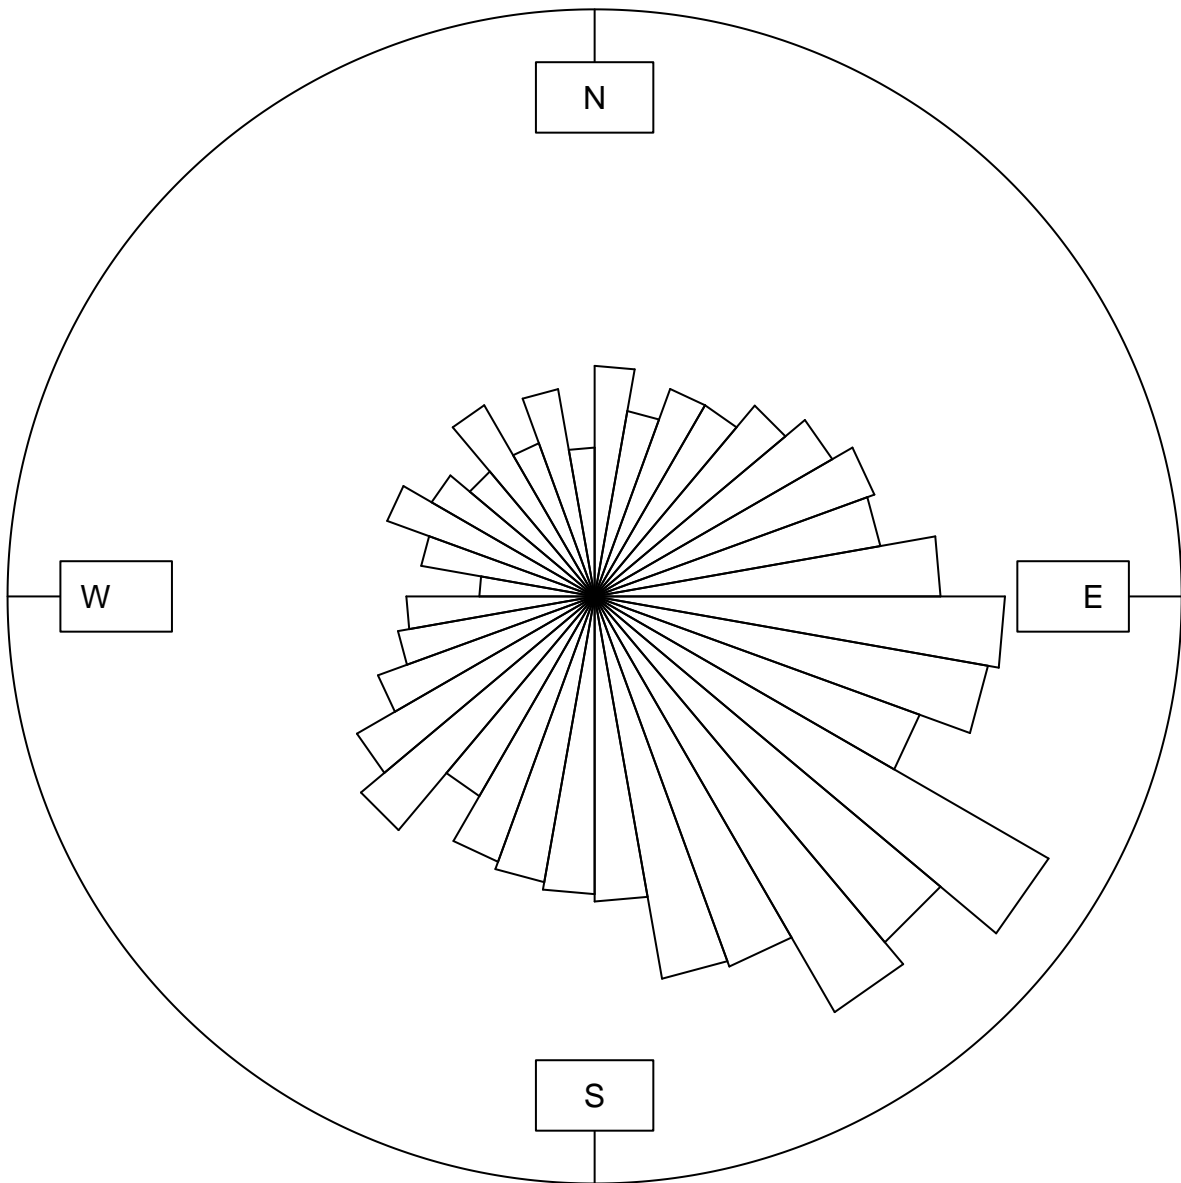

**bootstrap 243**

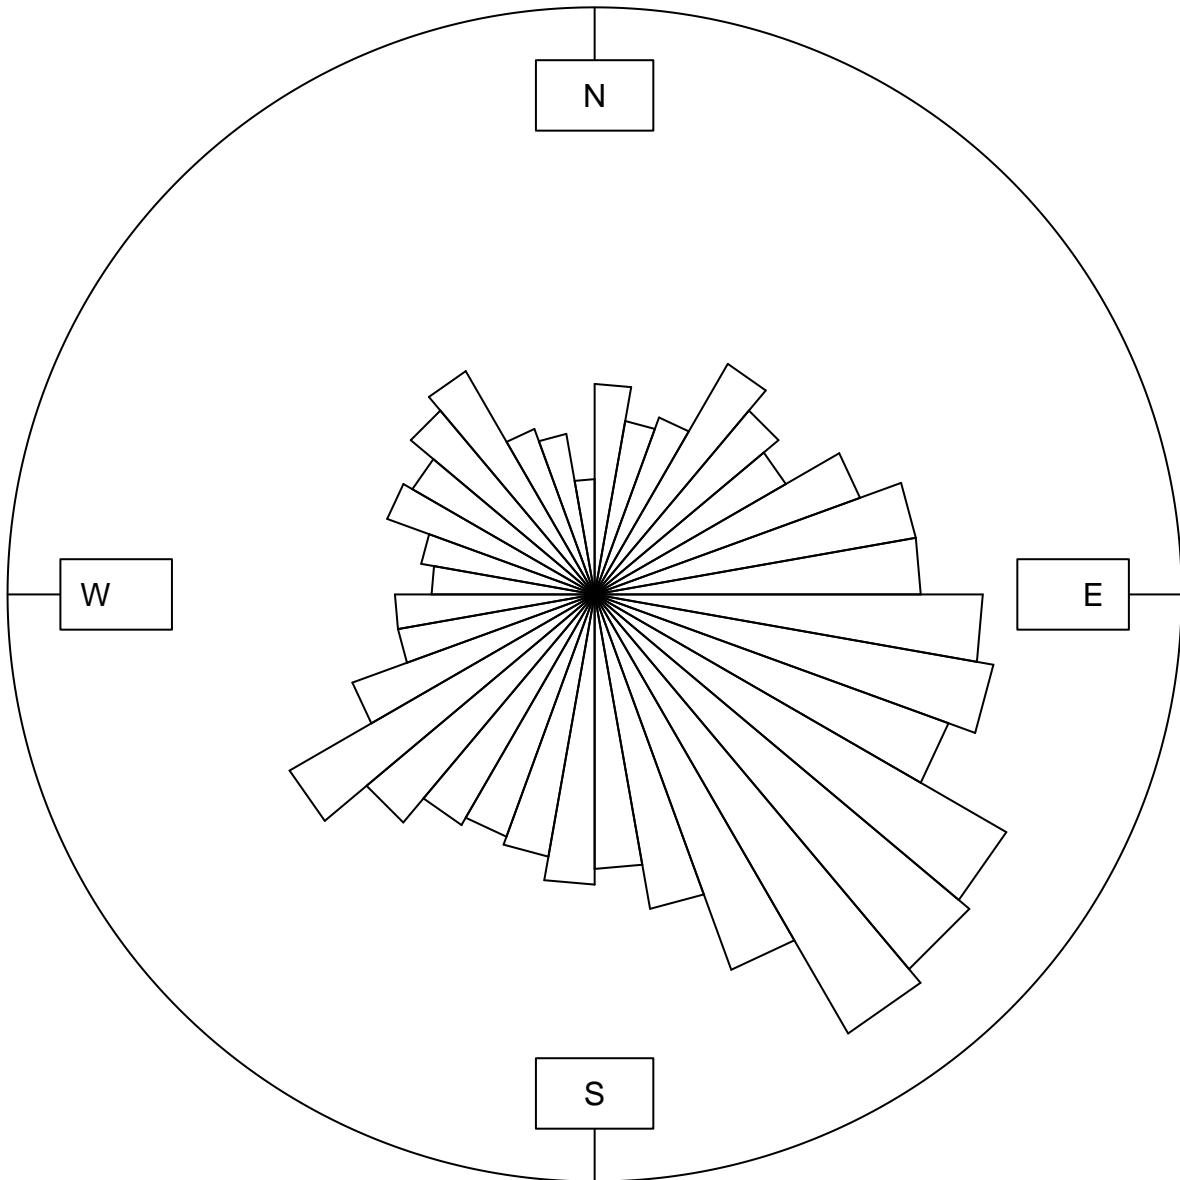

# bootstrap 244

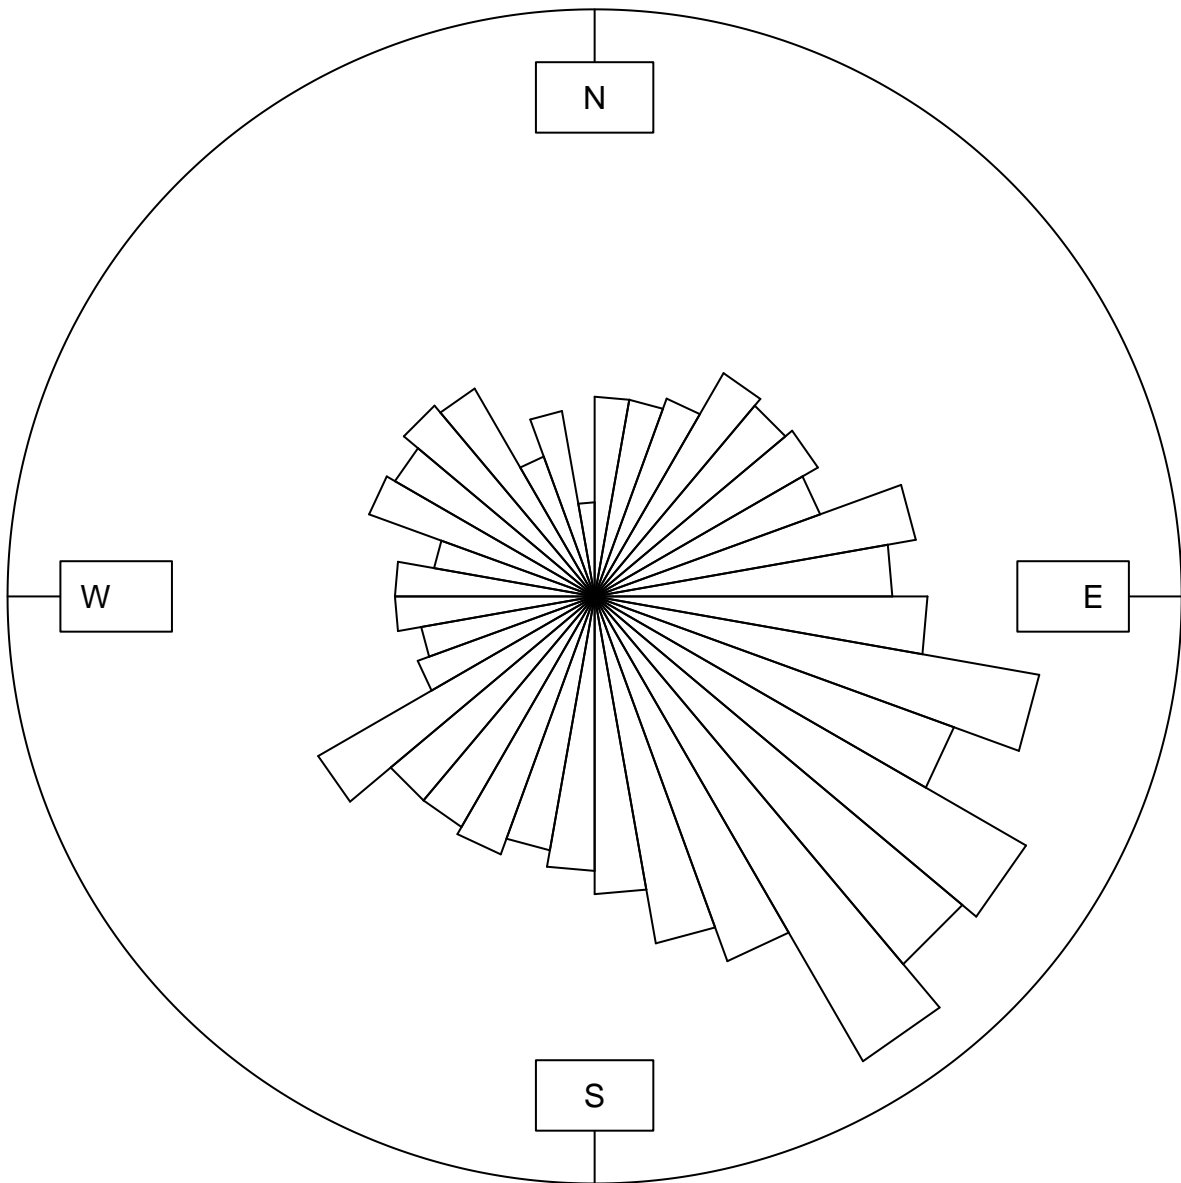

# bootstrap 245

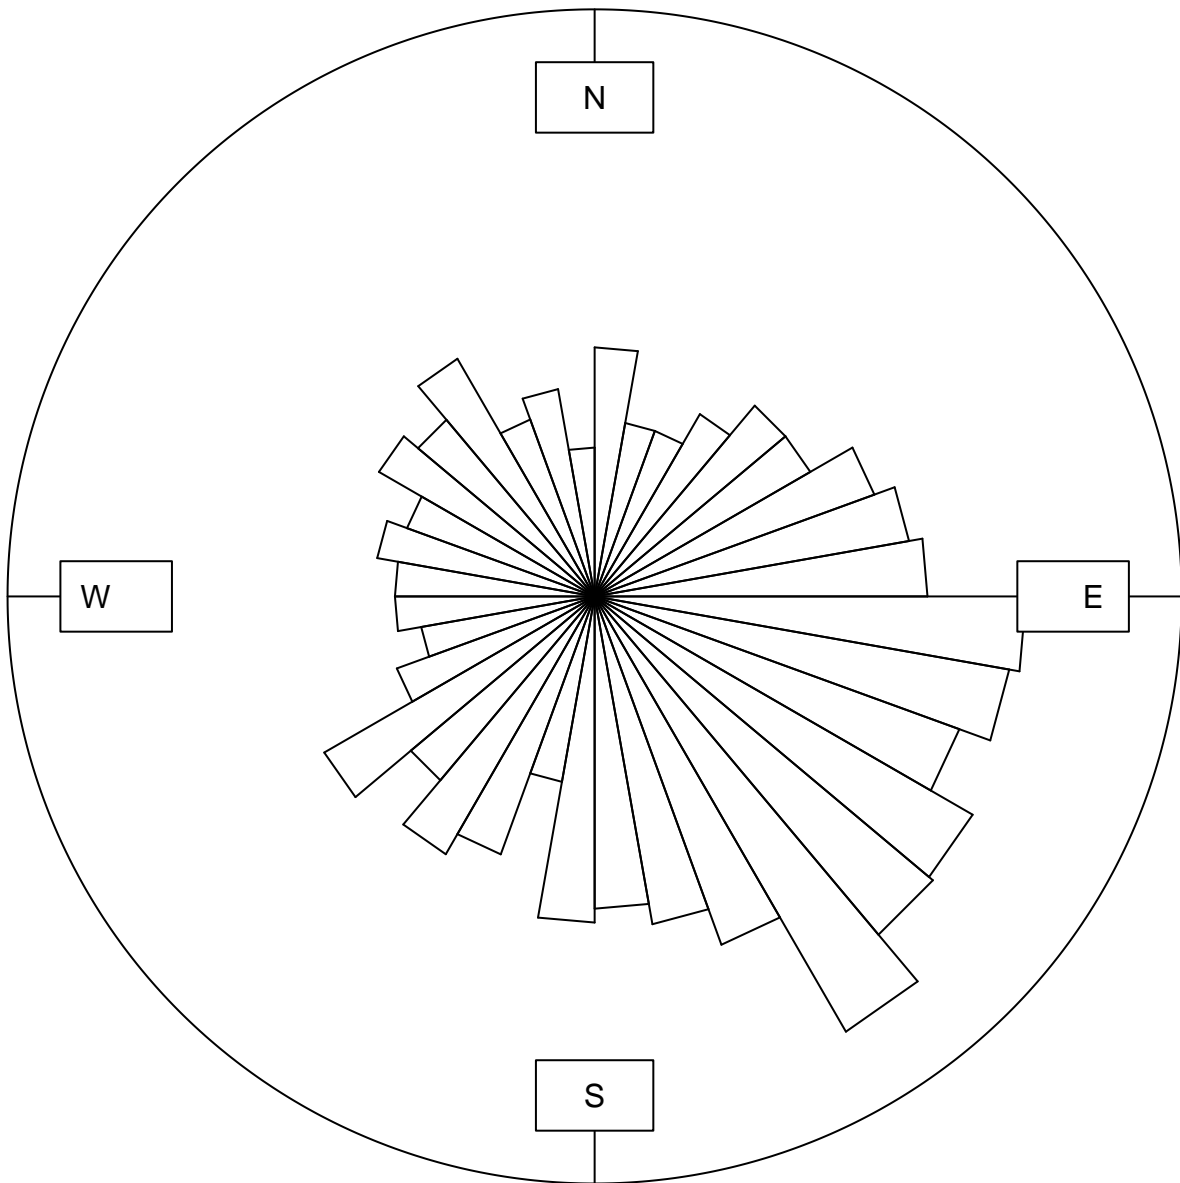

# bootstrap 246

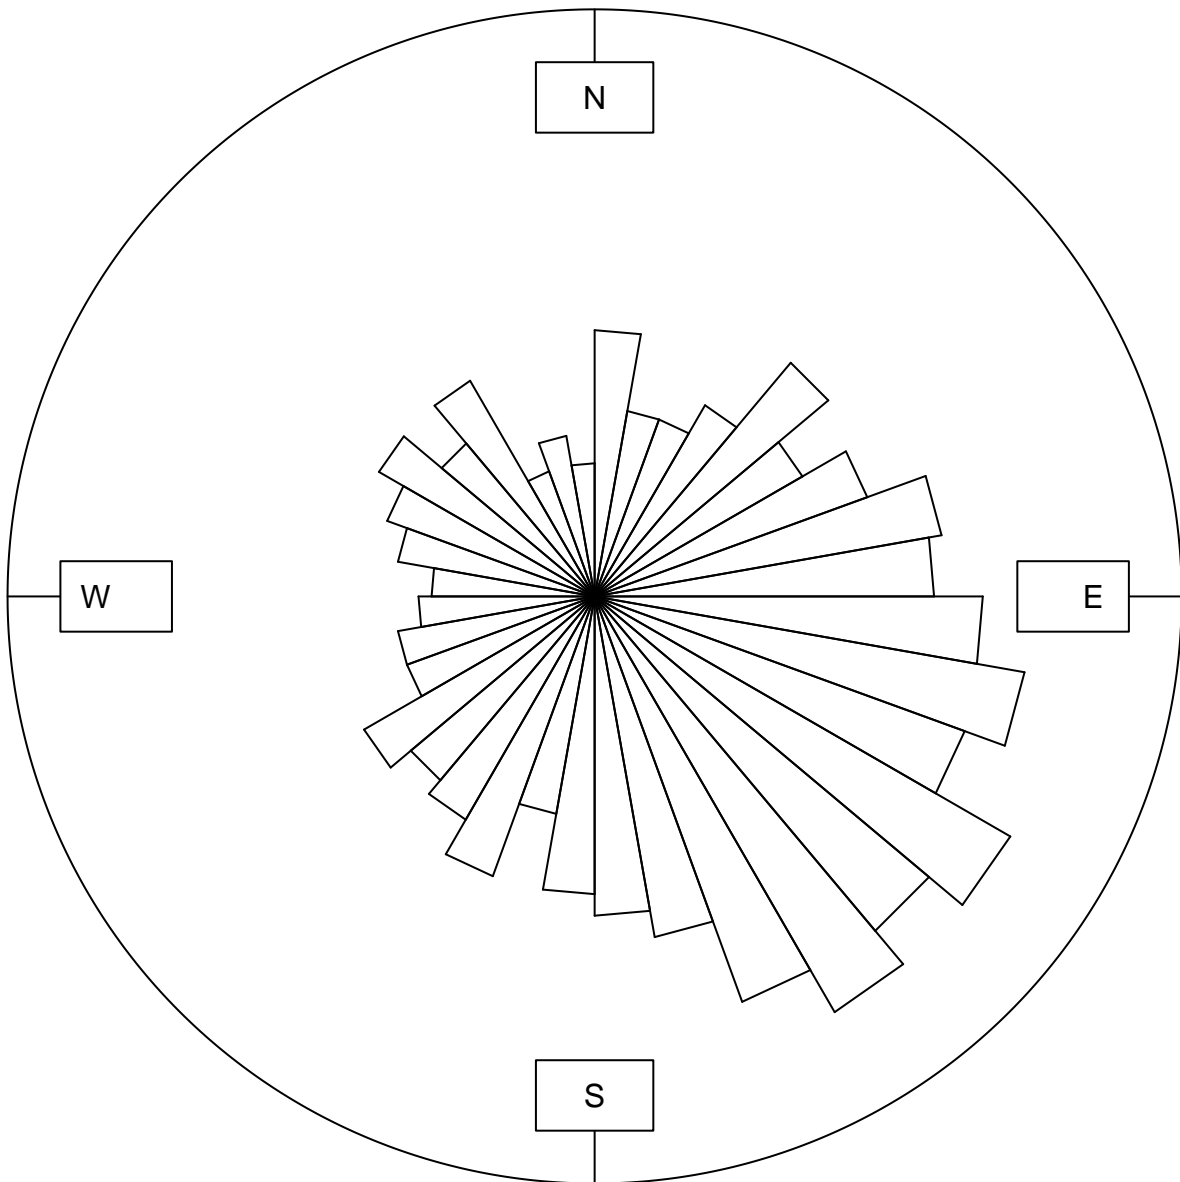

# bootstrap 247

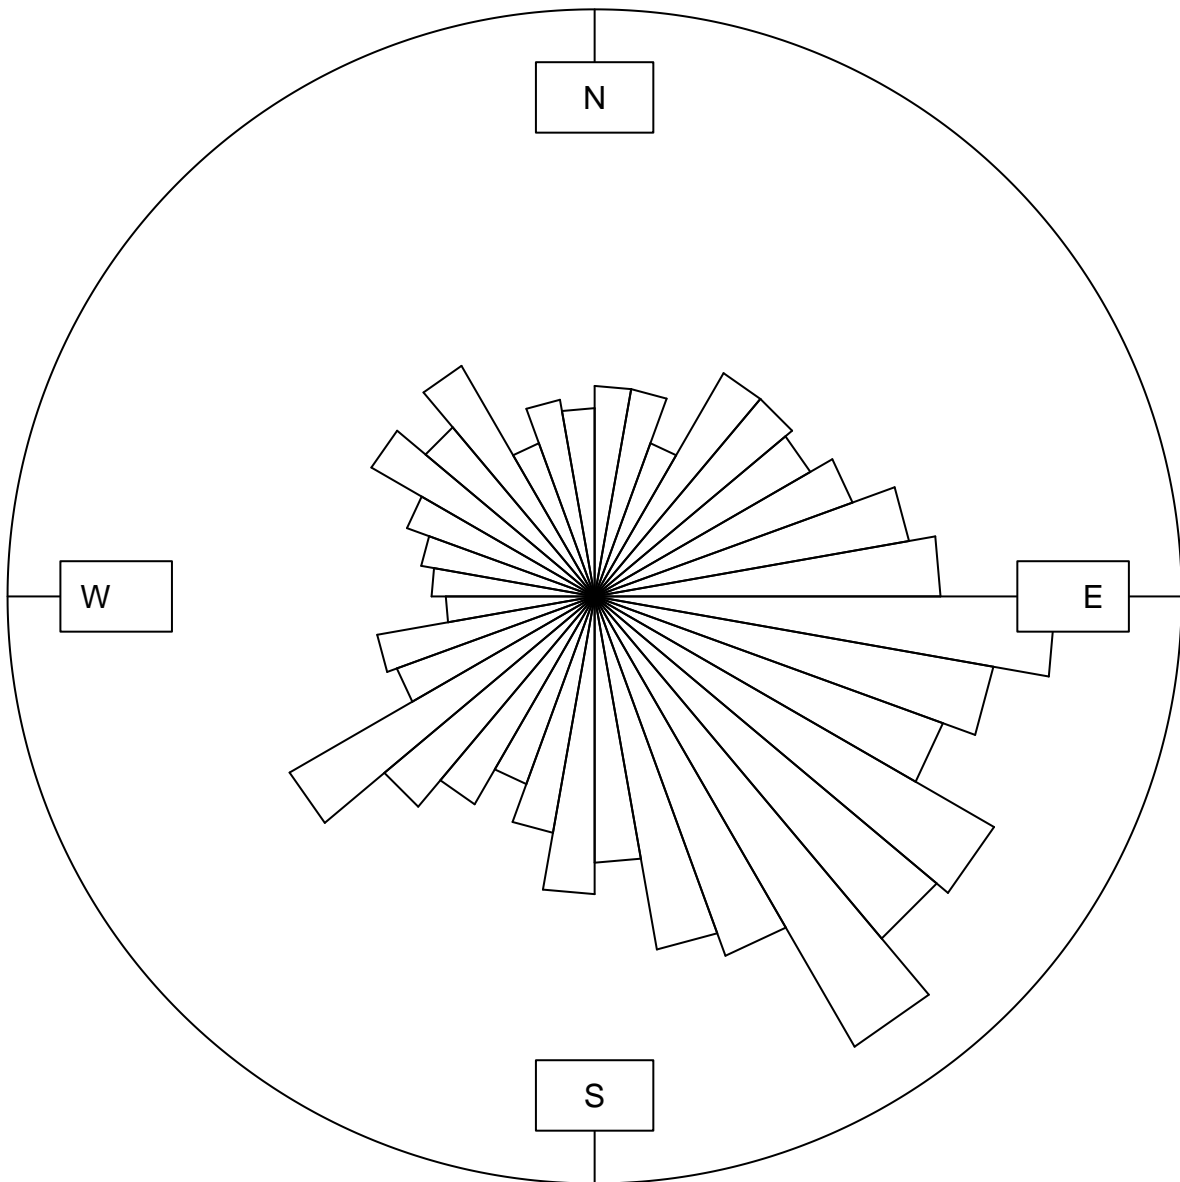

# bootstrap 248

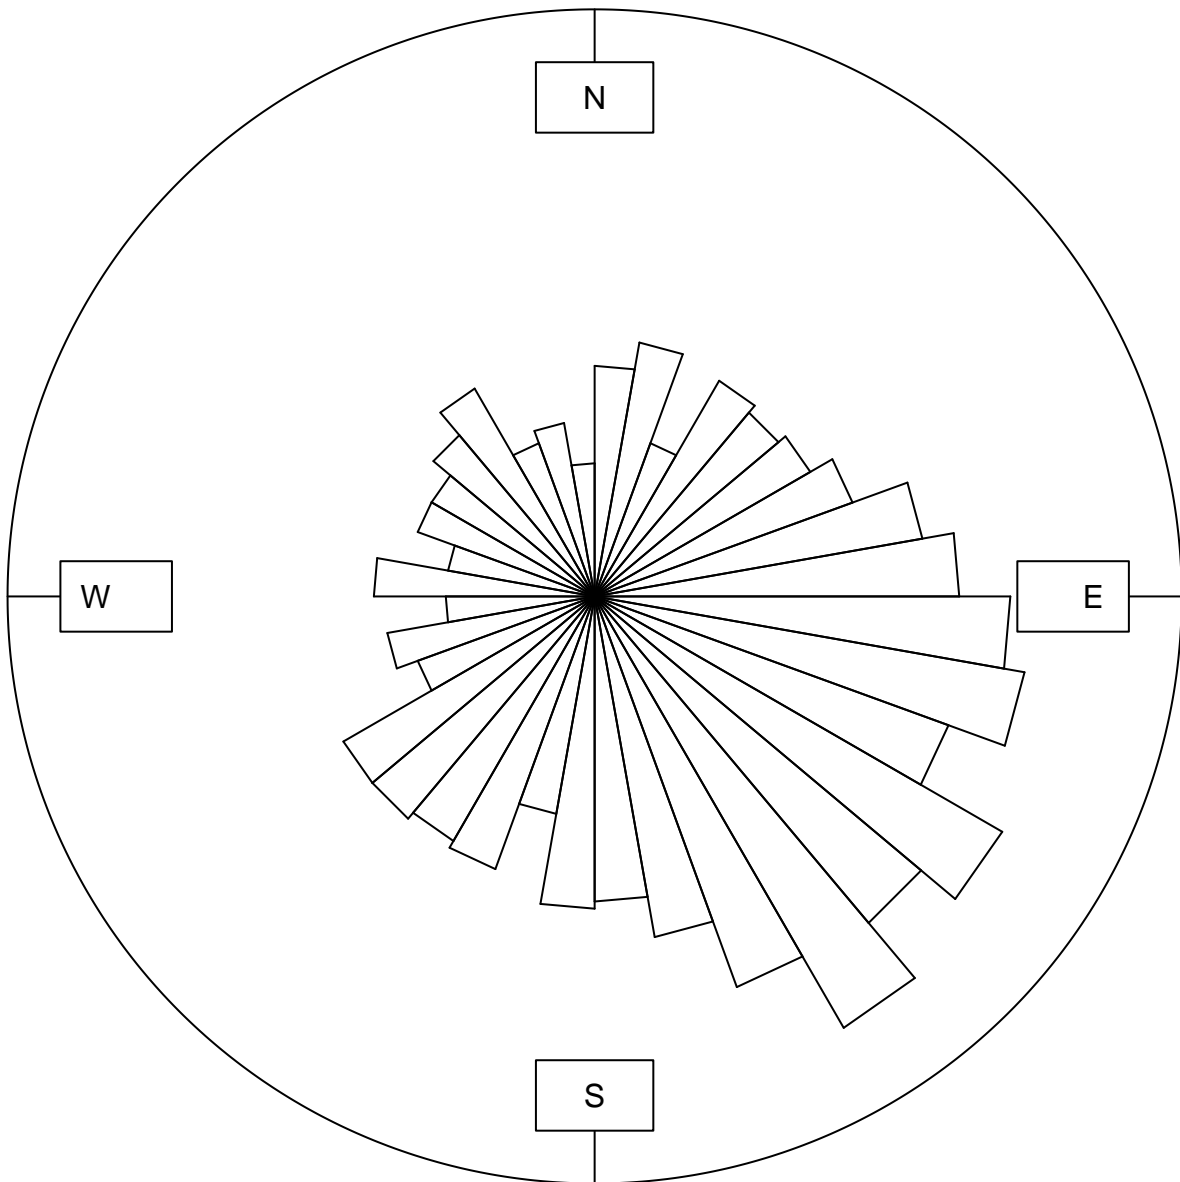



# bootstrap 249

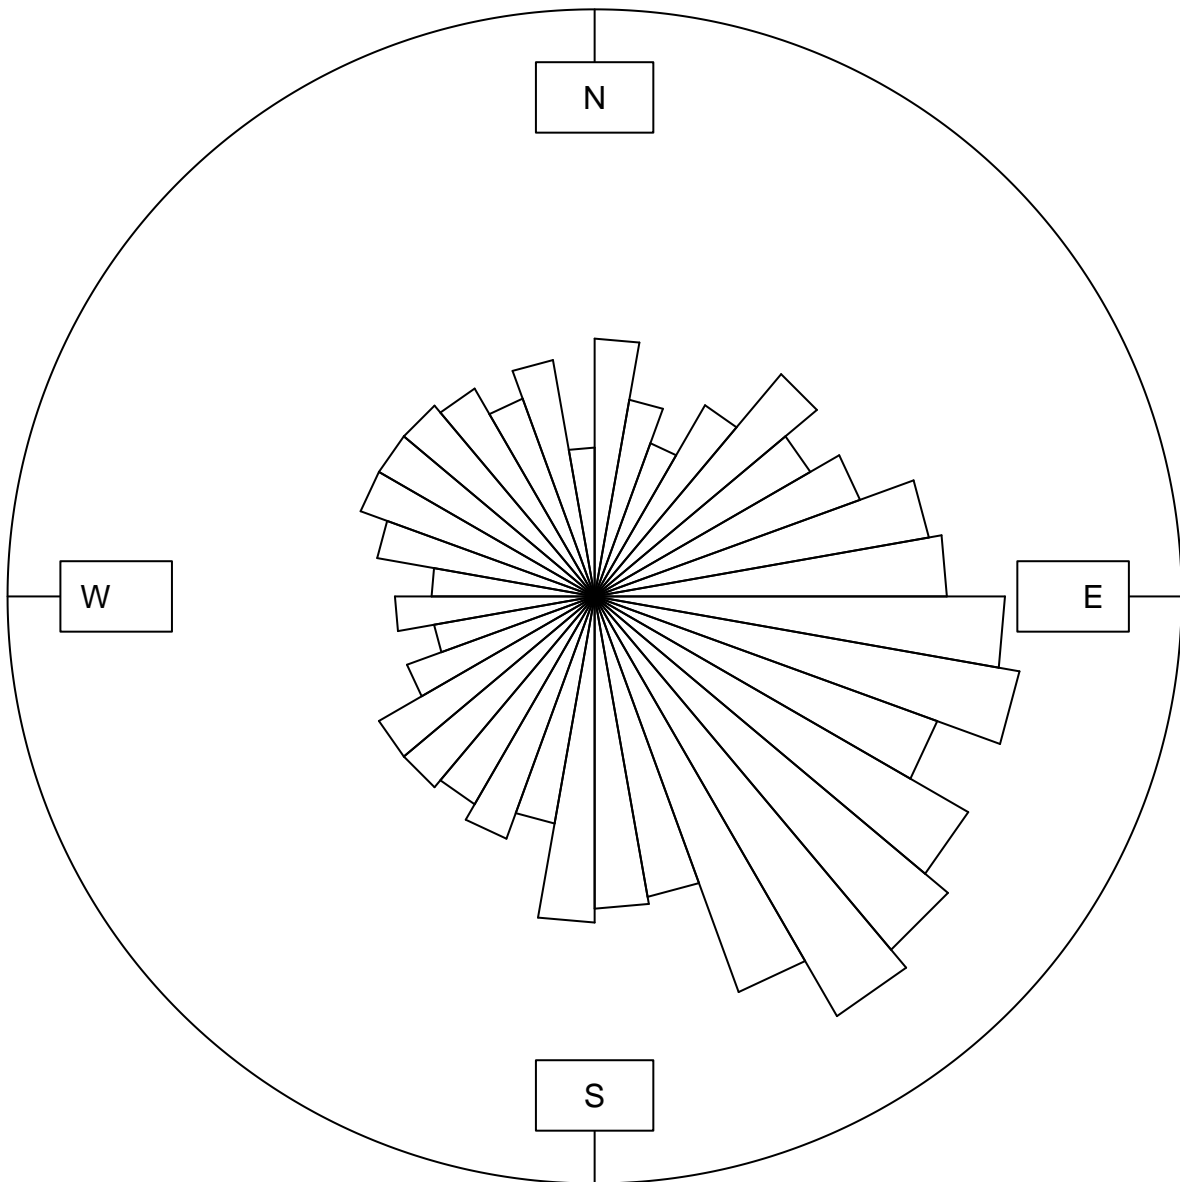

# bootstrap 250

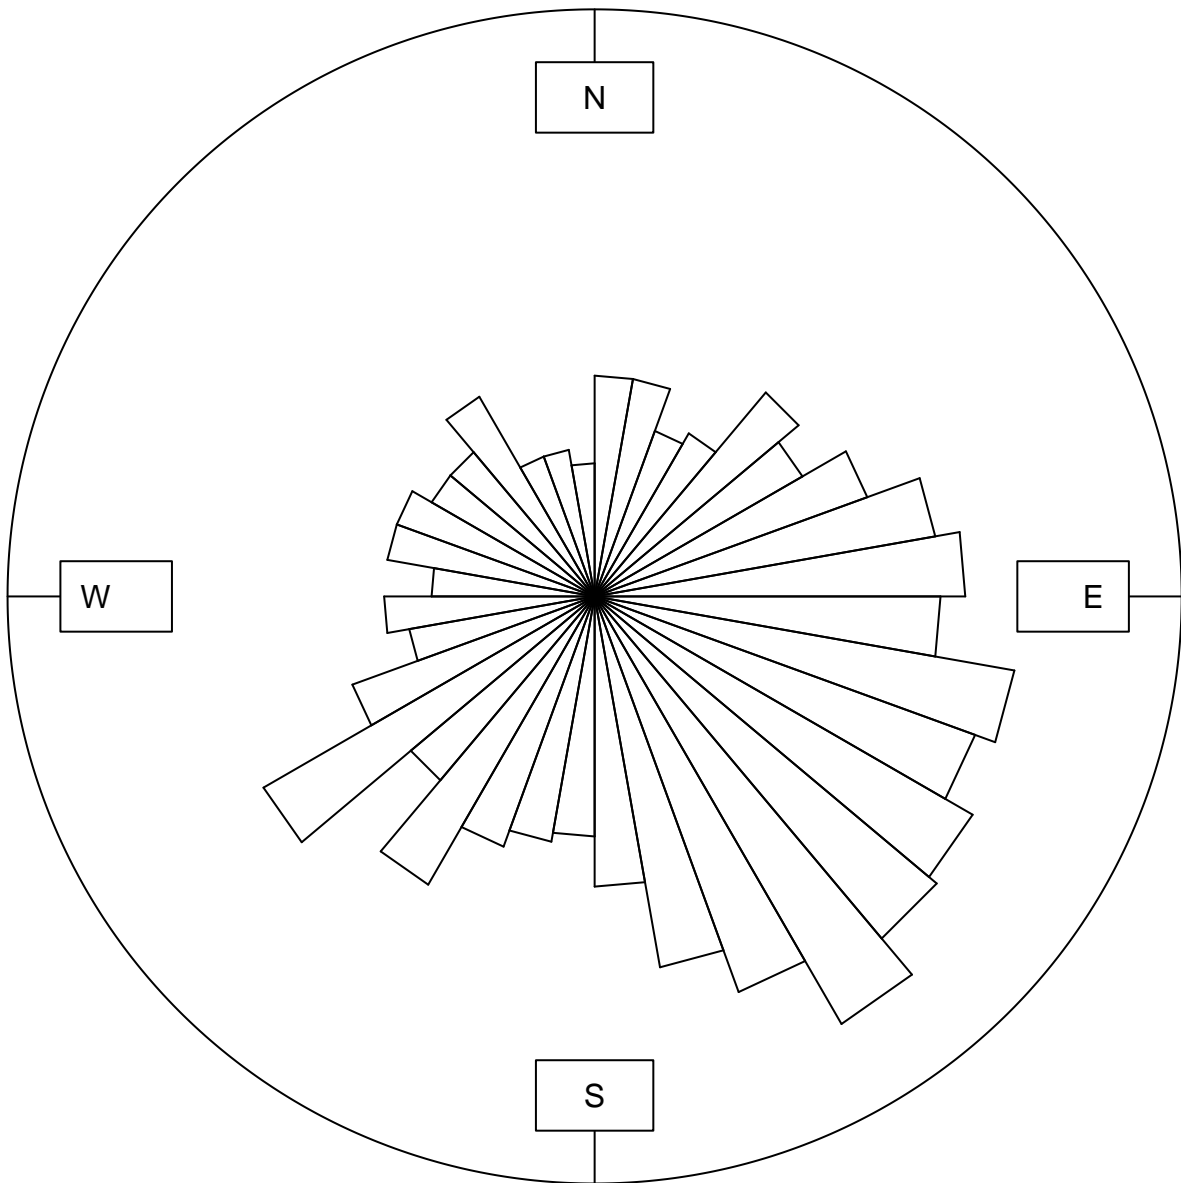

**bootstrap 251**

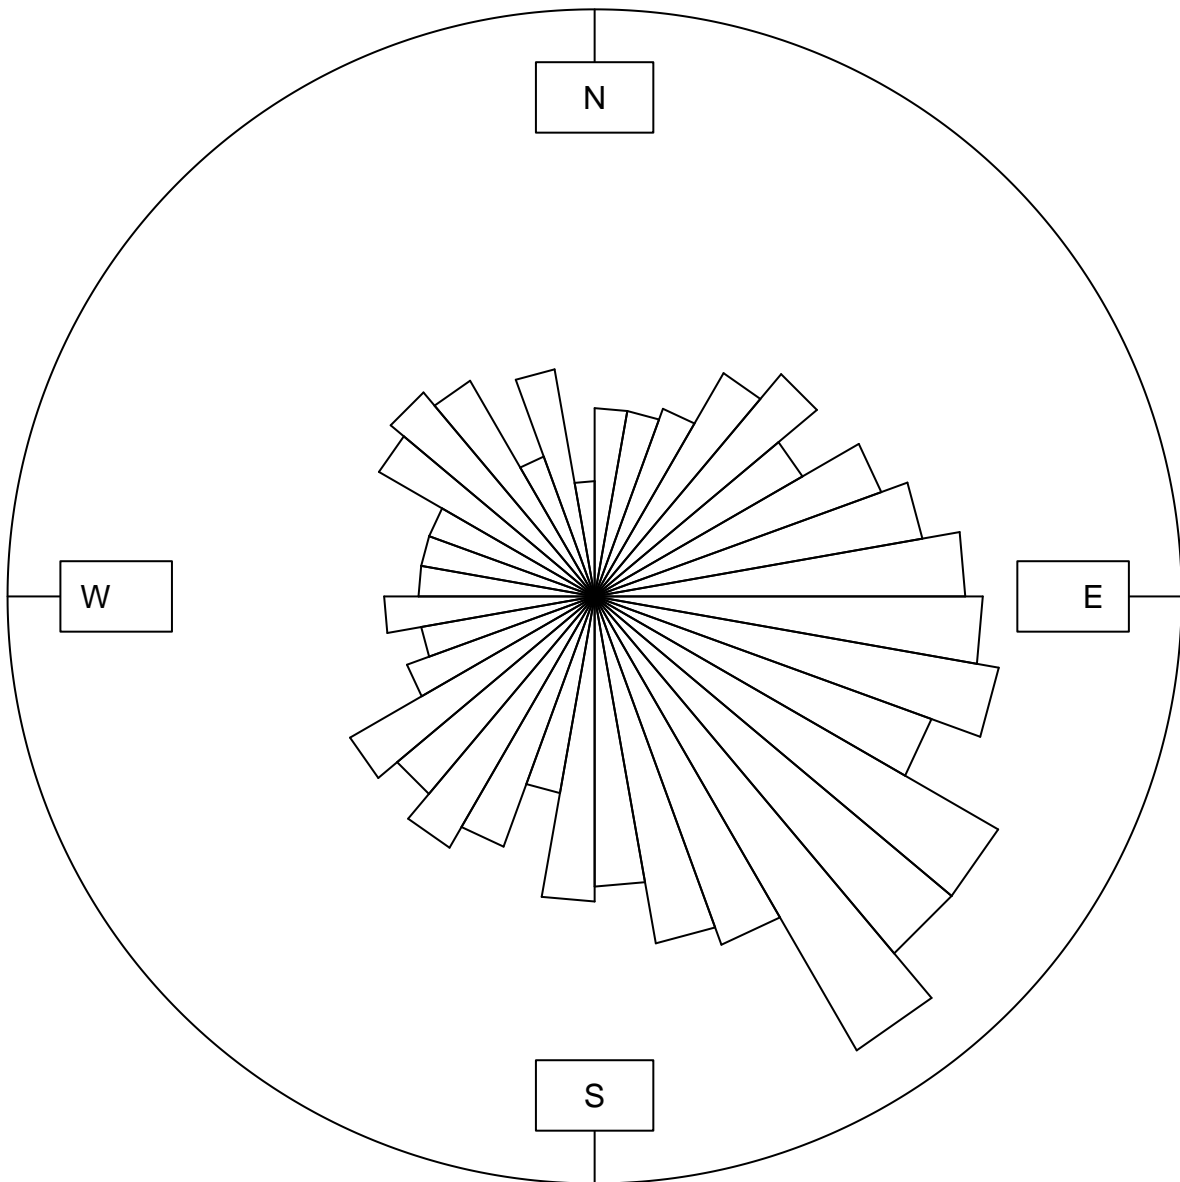

# bootstrap 252

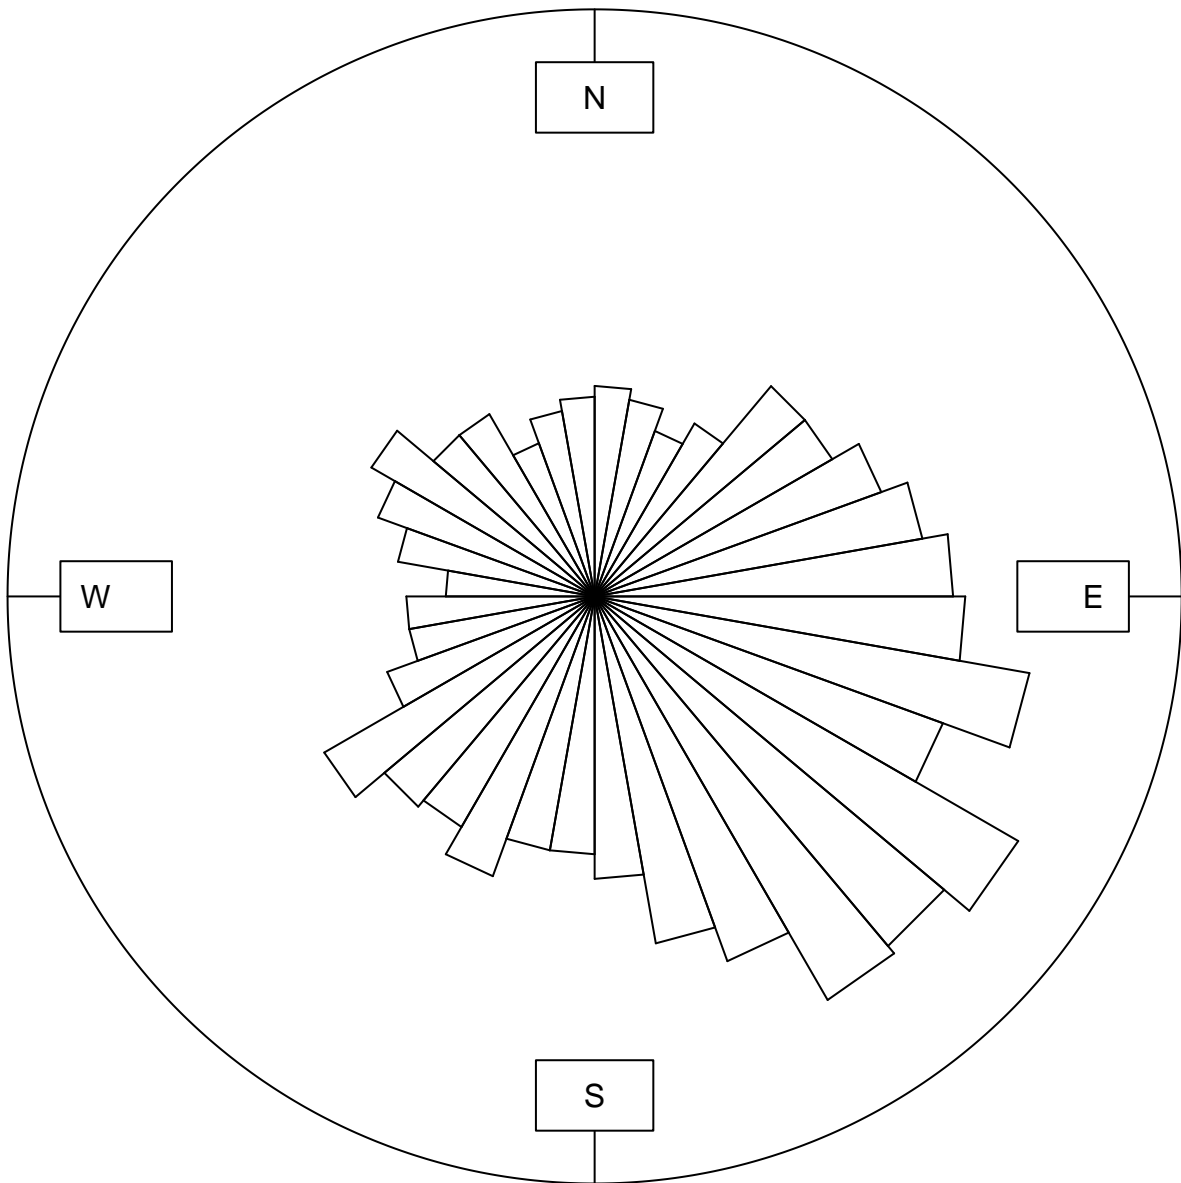

# bootstrap 253

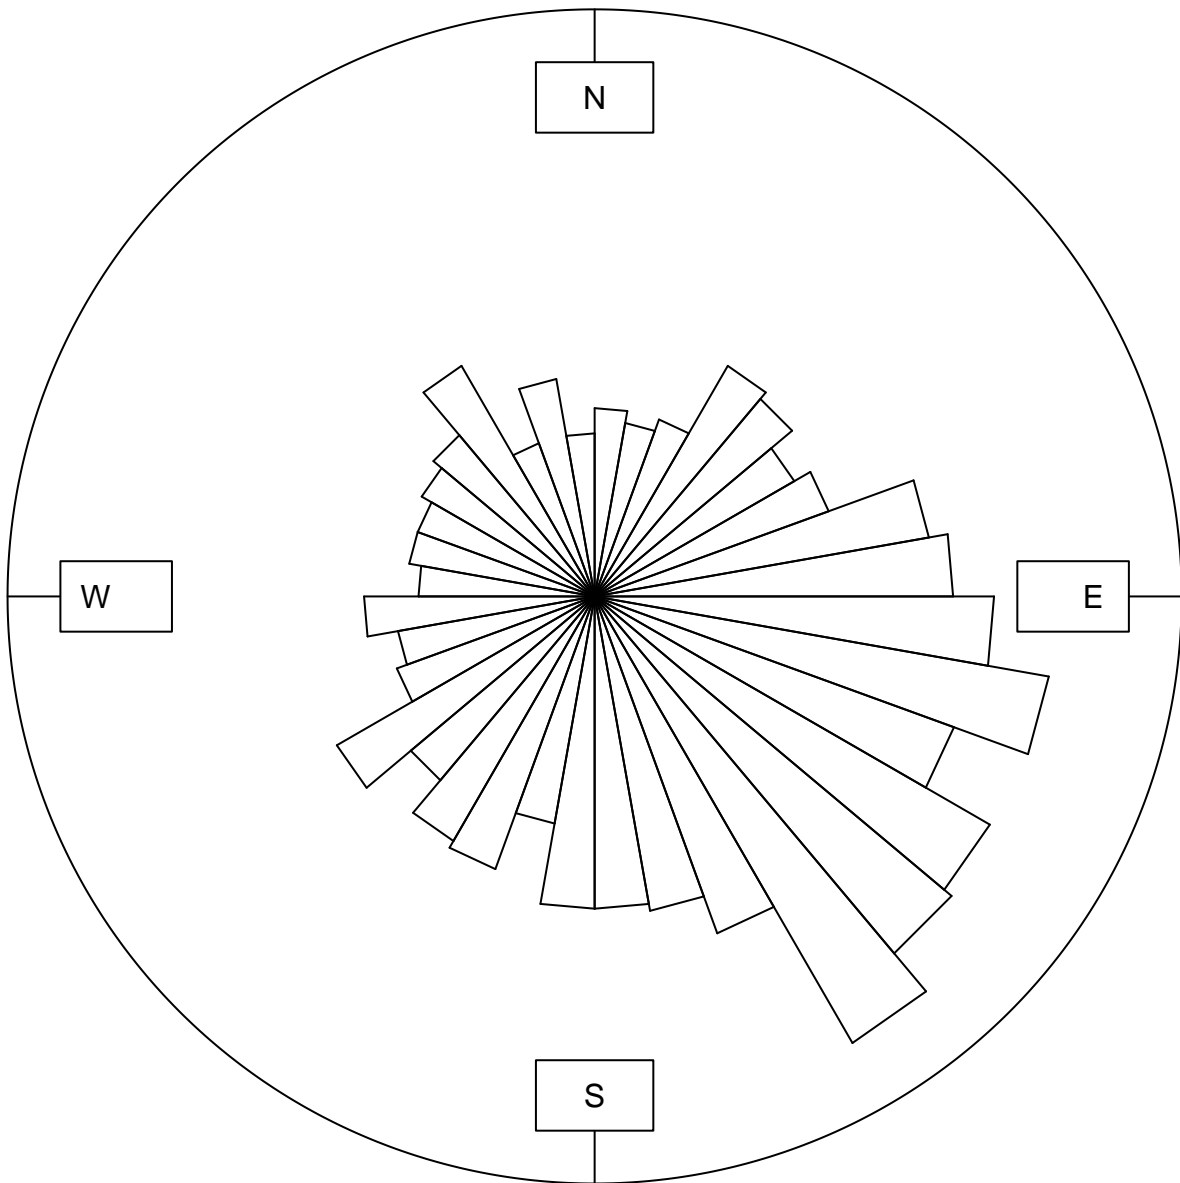

# bootstrap 254

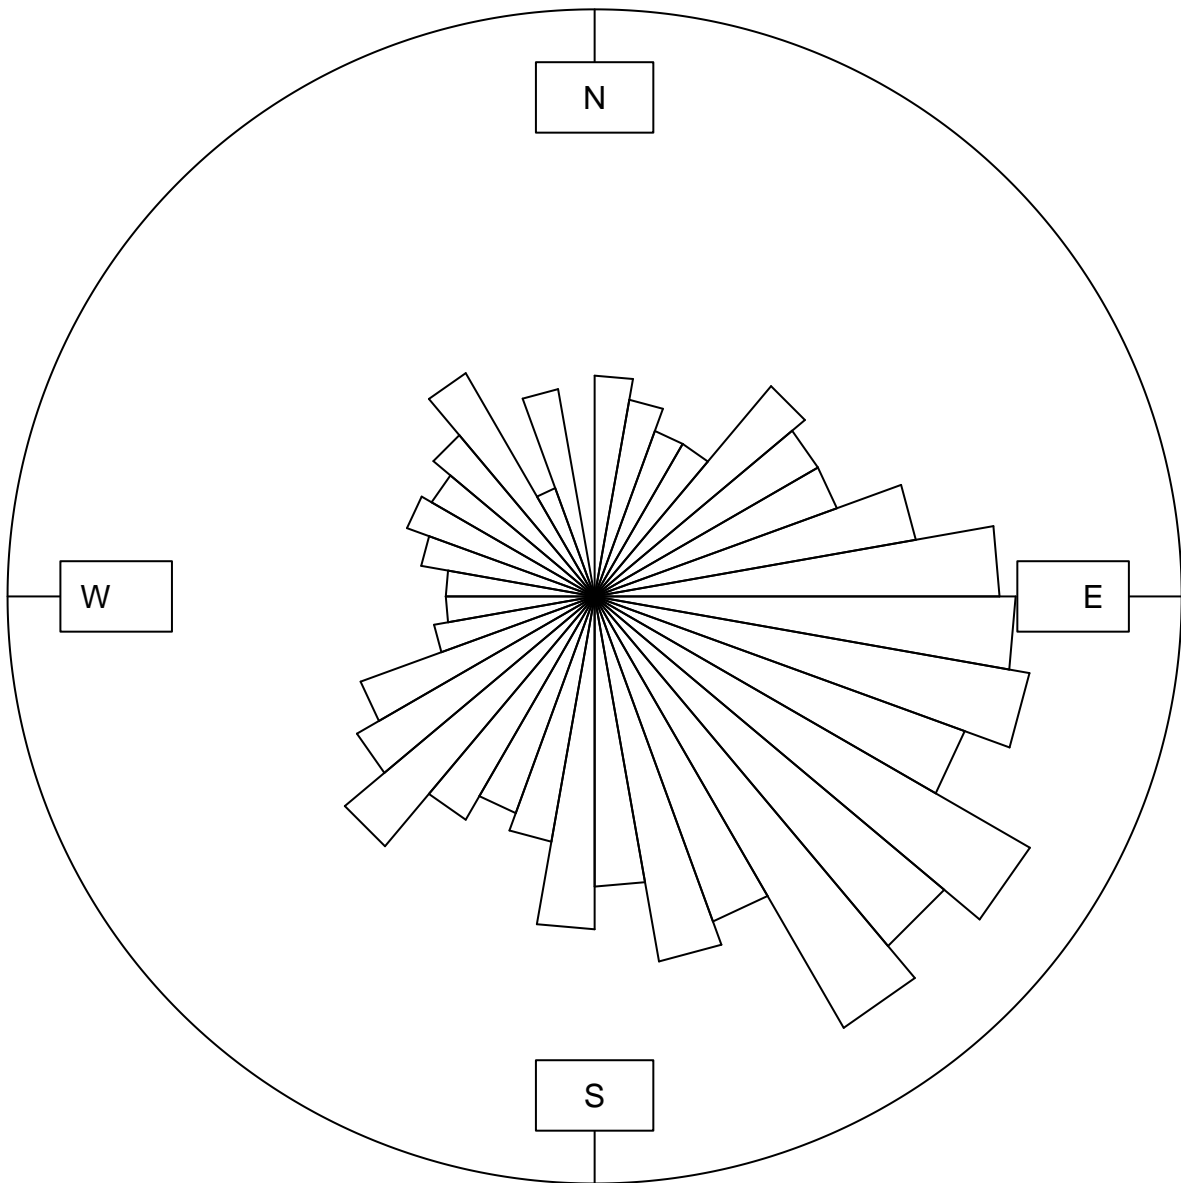

# bootstrap 255

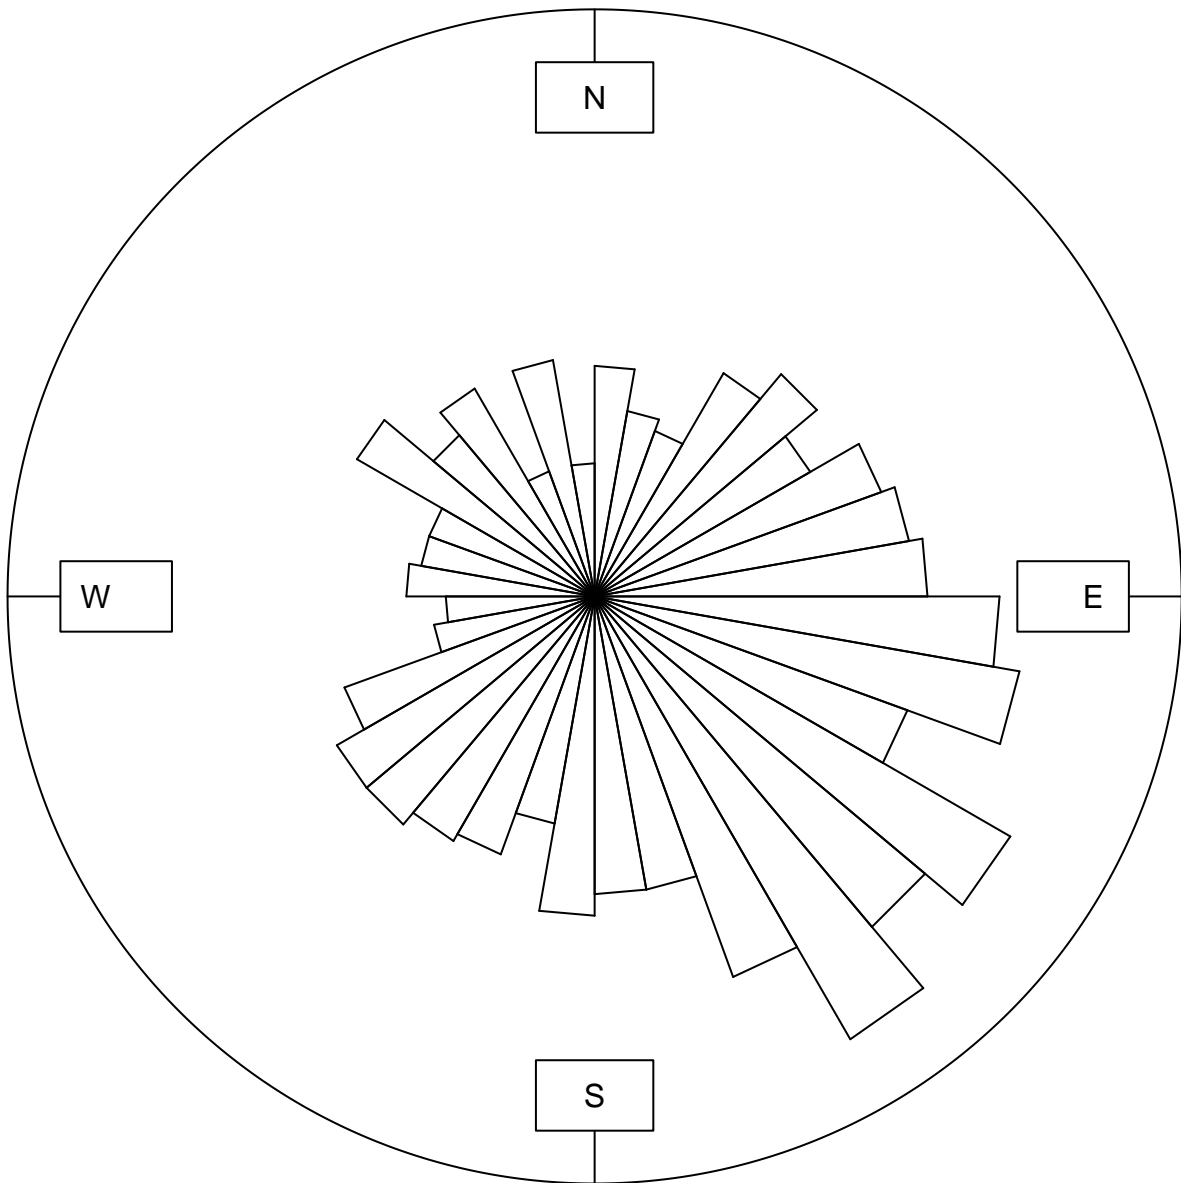

# bootstrap 256

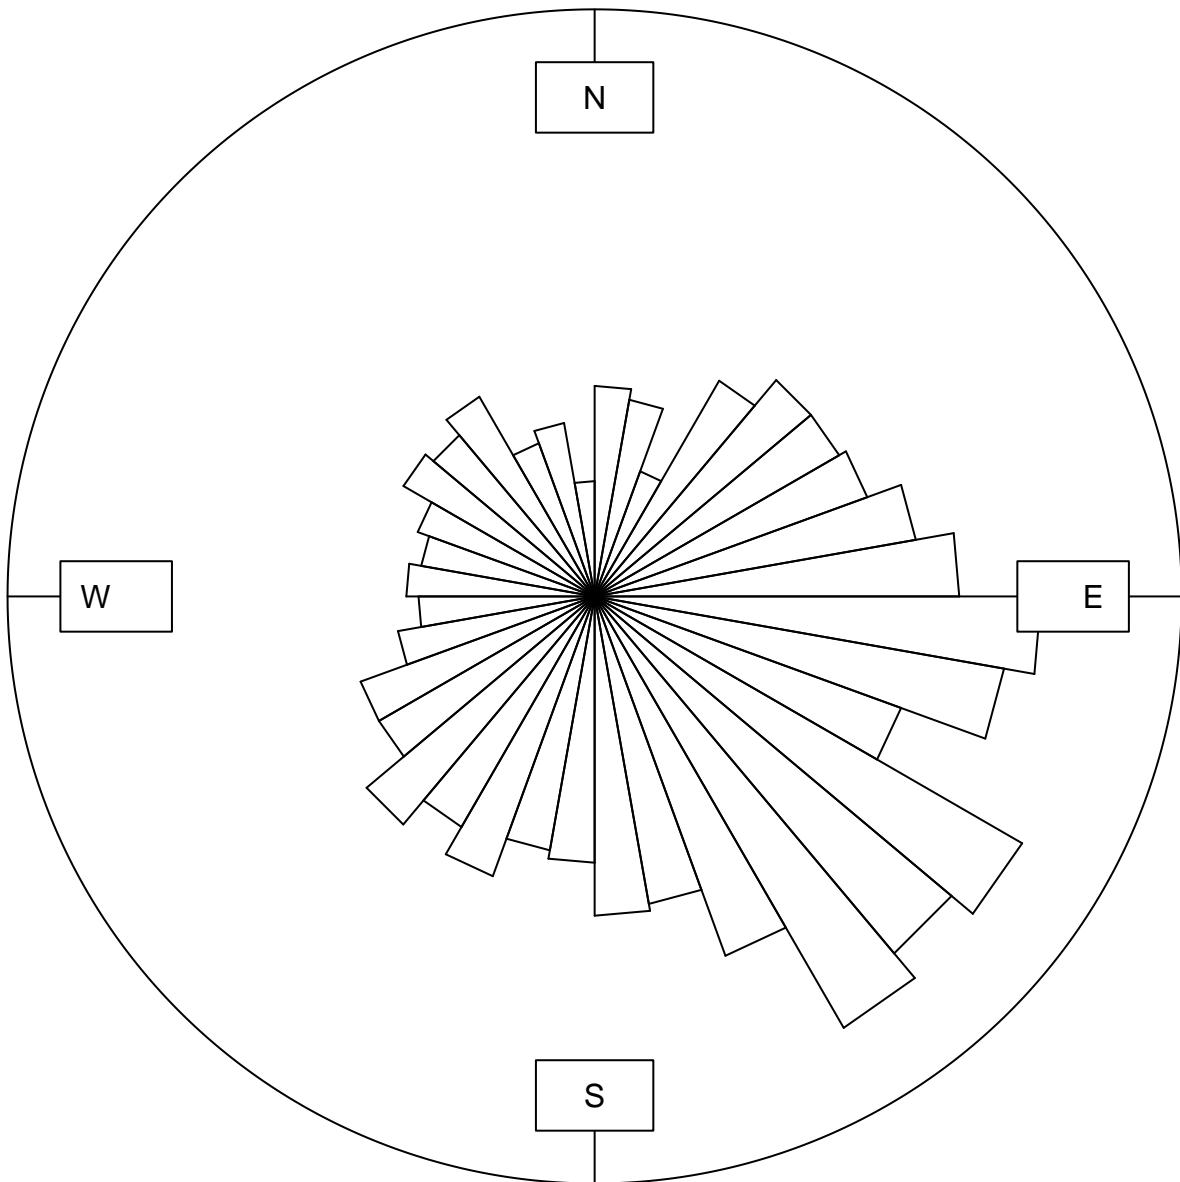



**bootstrap 257**

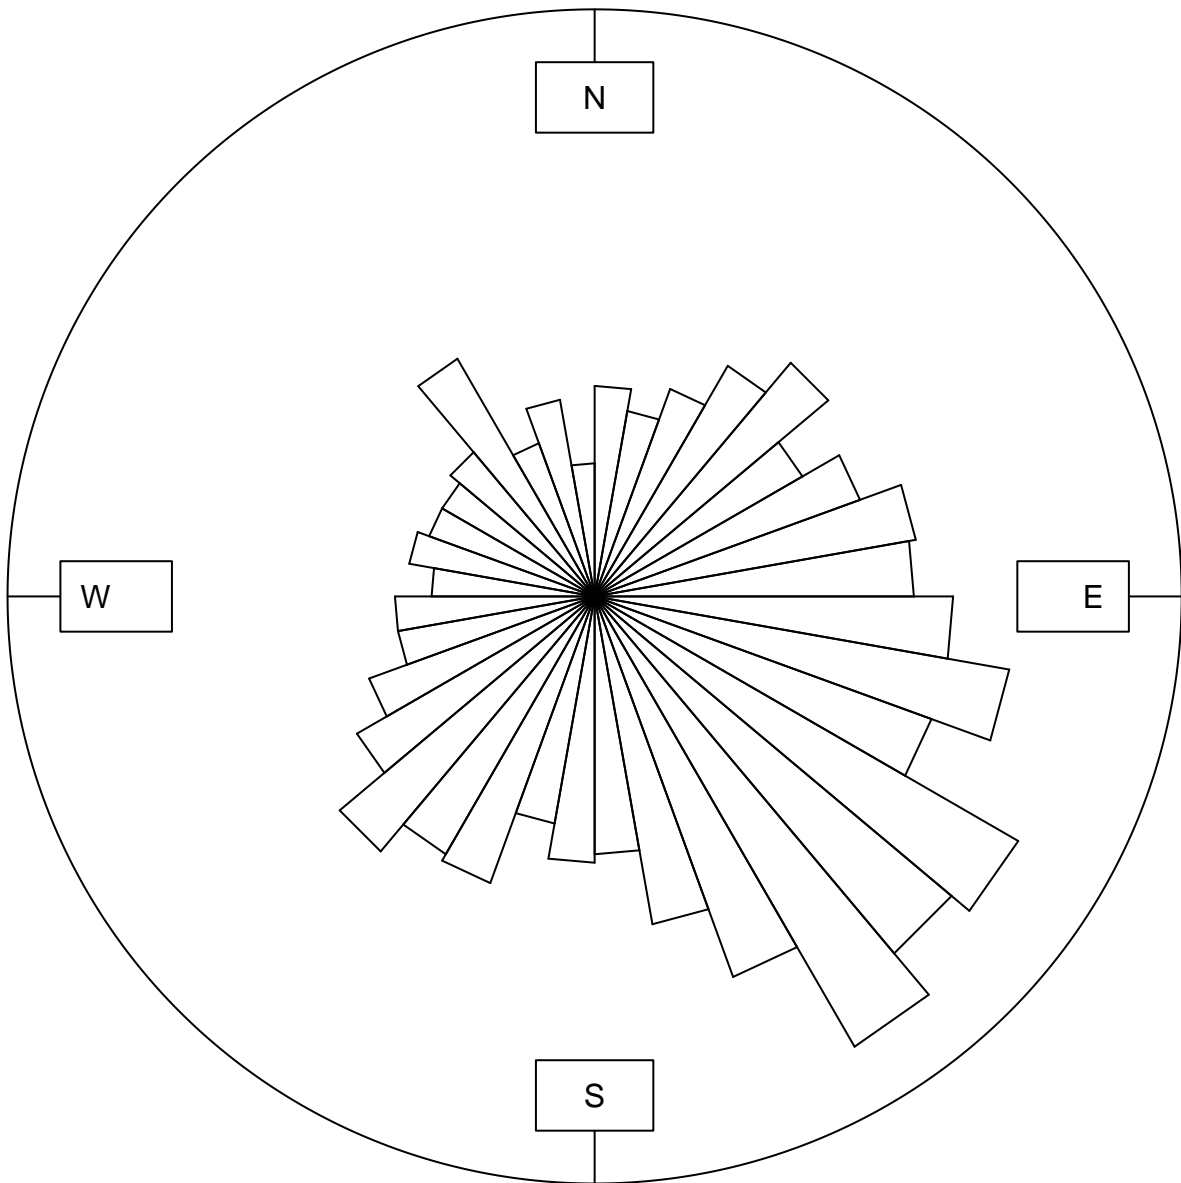

**bootstrap 258**

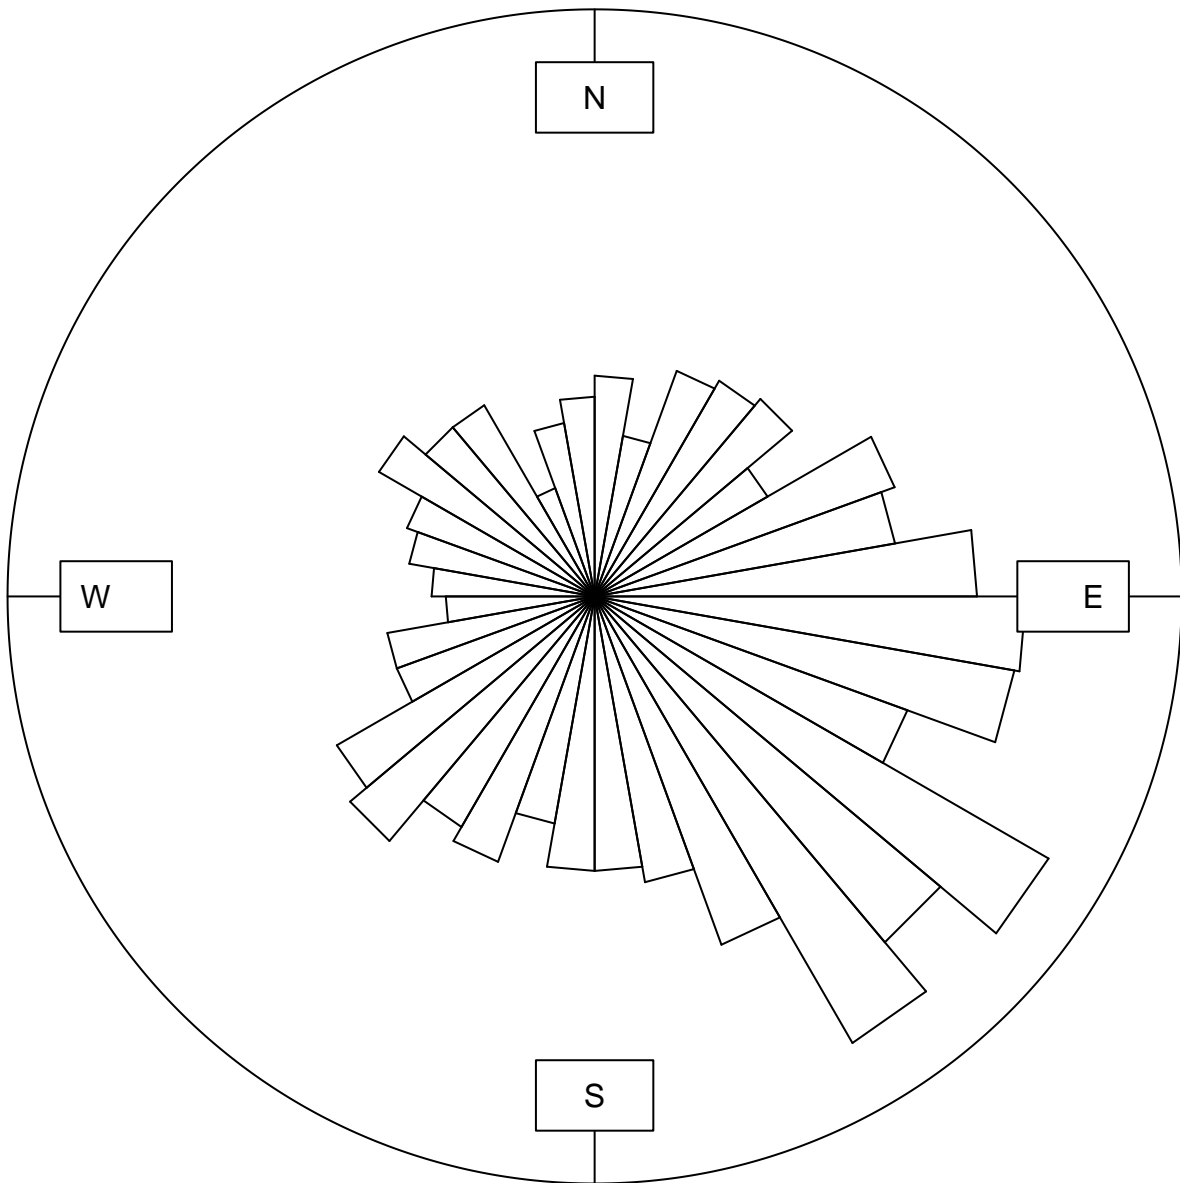

**bootstrap 259**

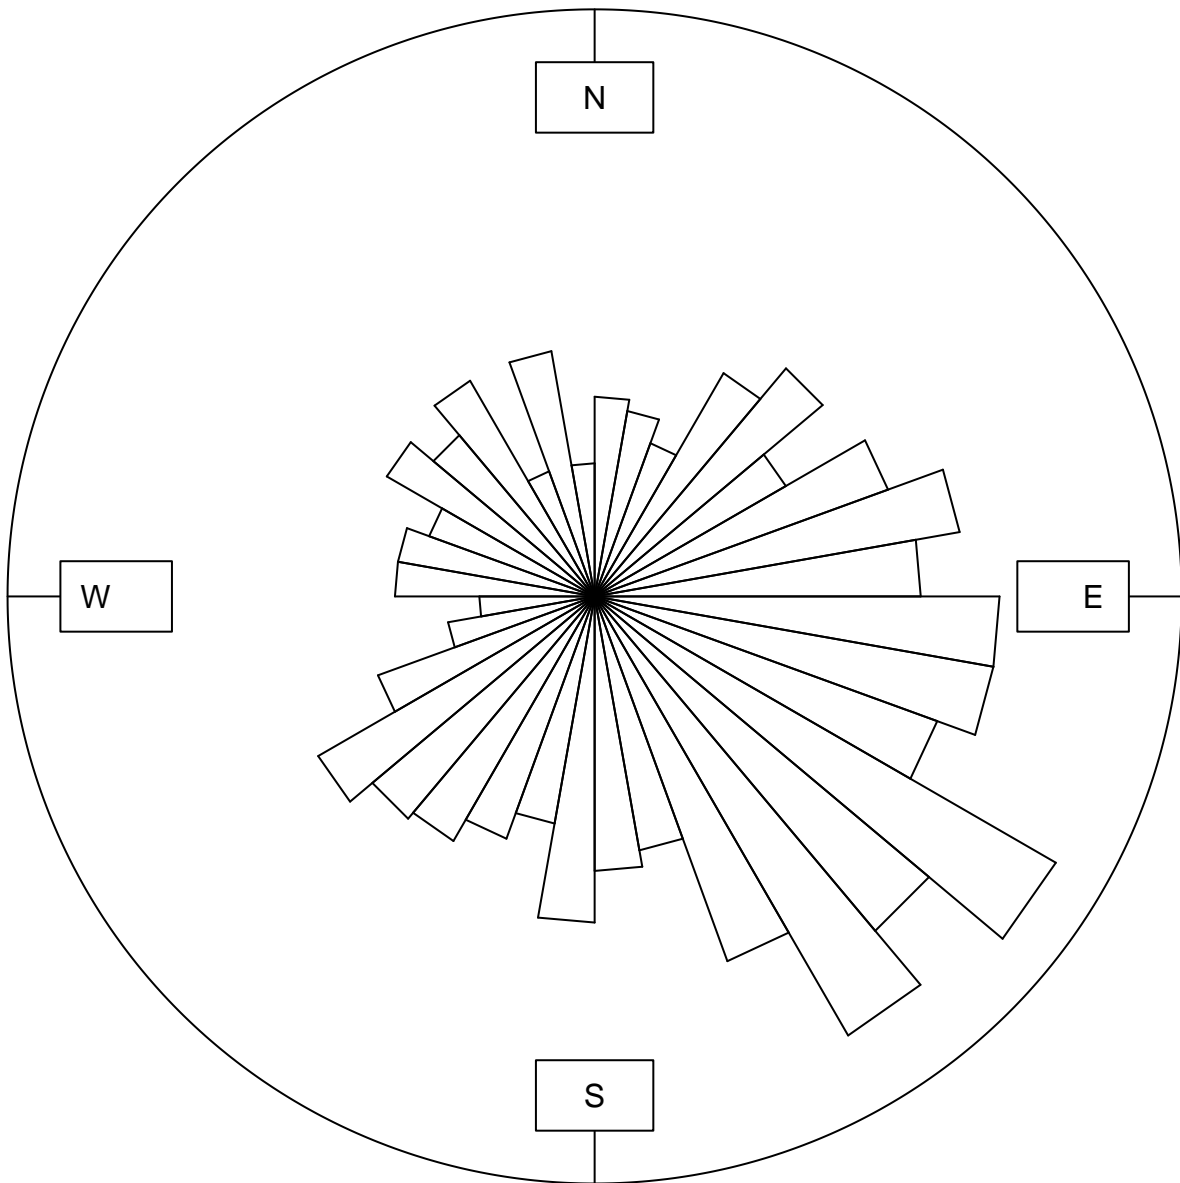

# bootstrap 260

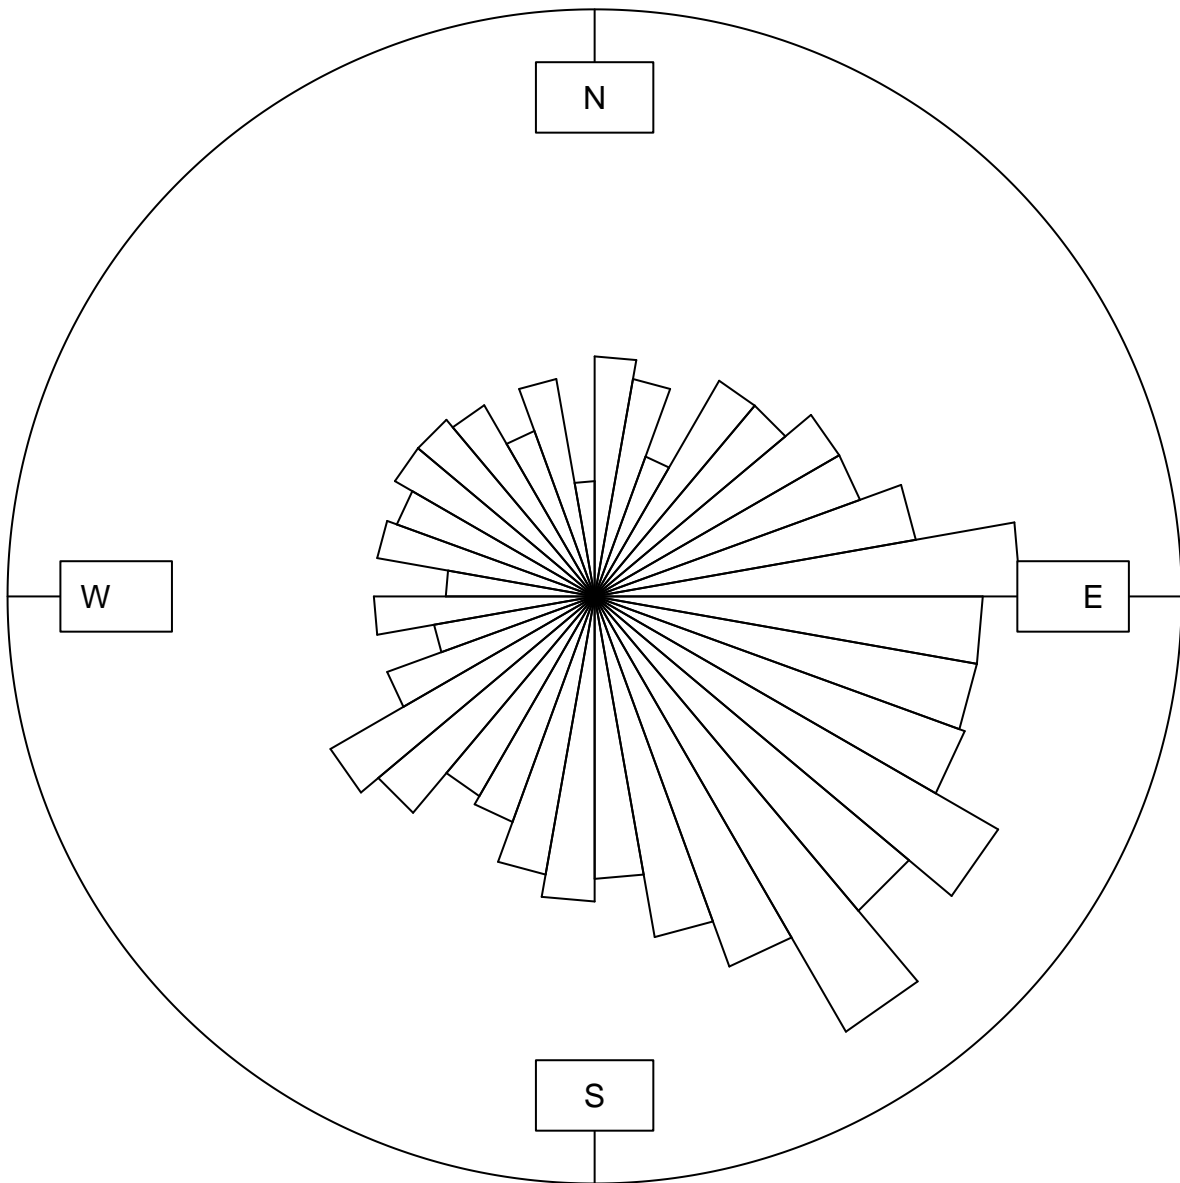

# bootstrap 261

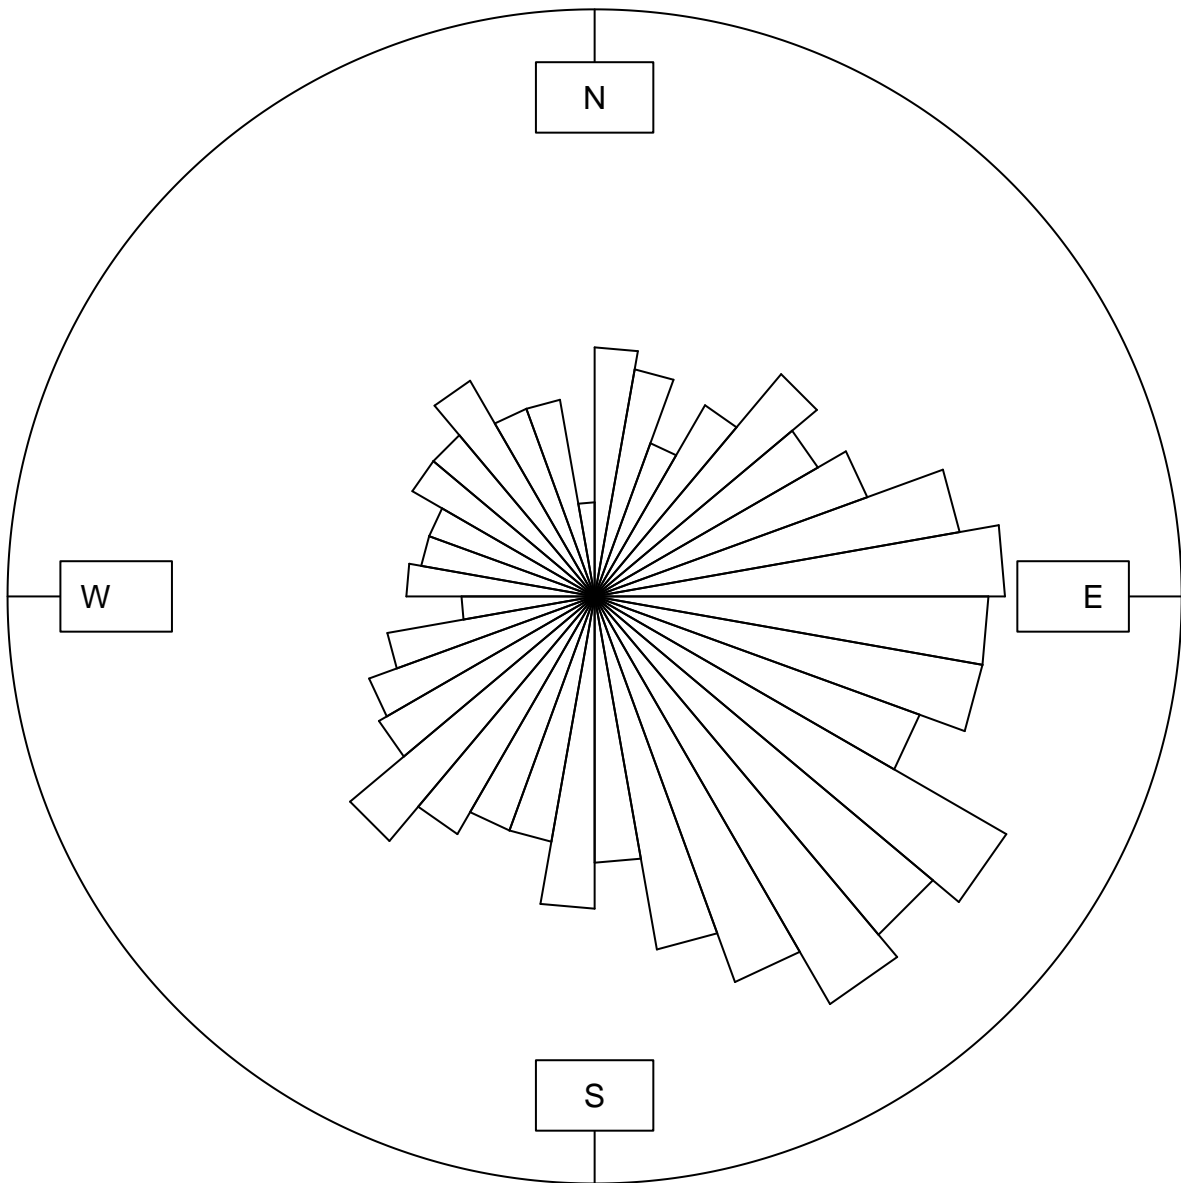

# bootstrap 262

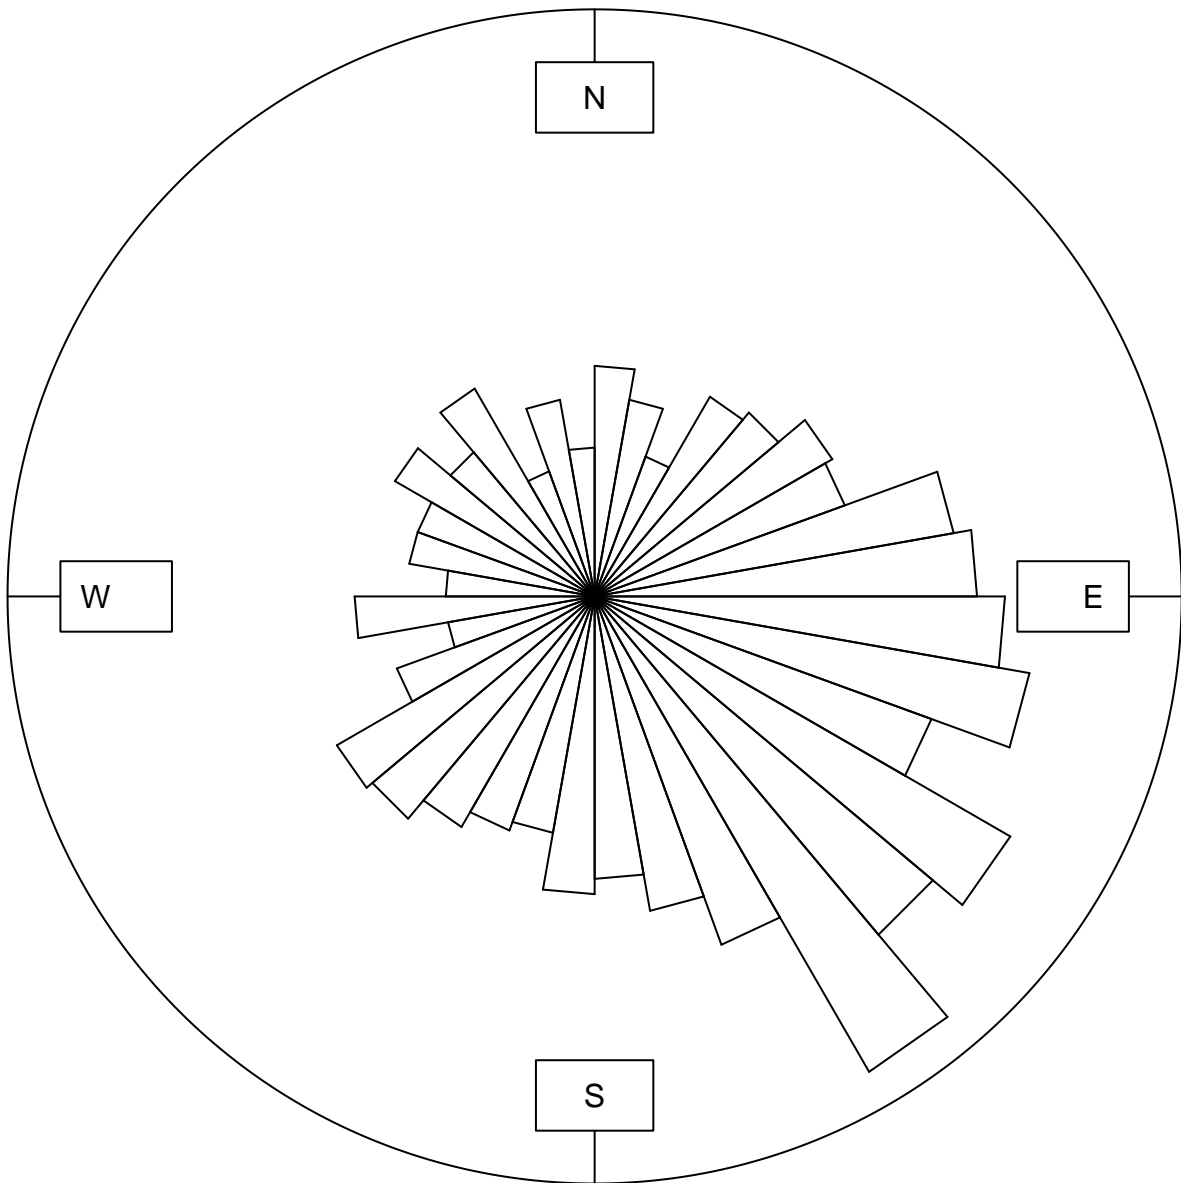

# bootstrap 263

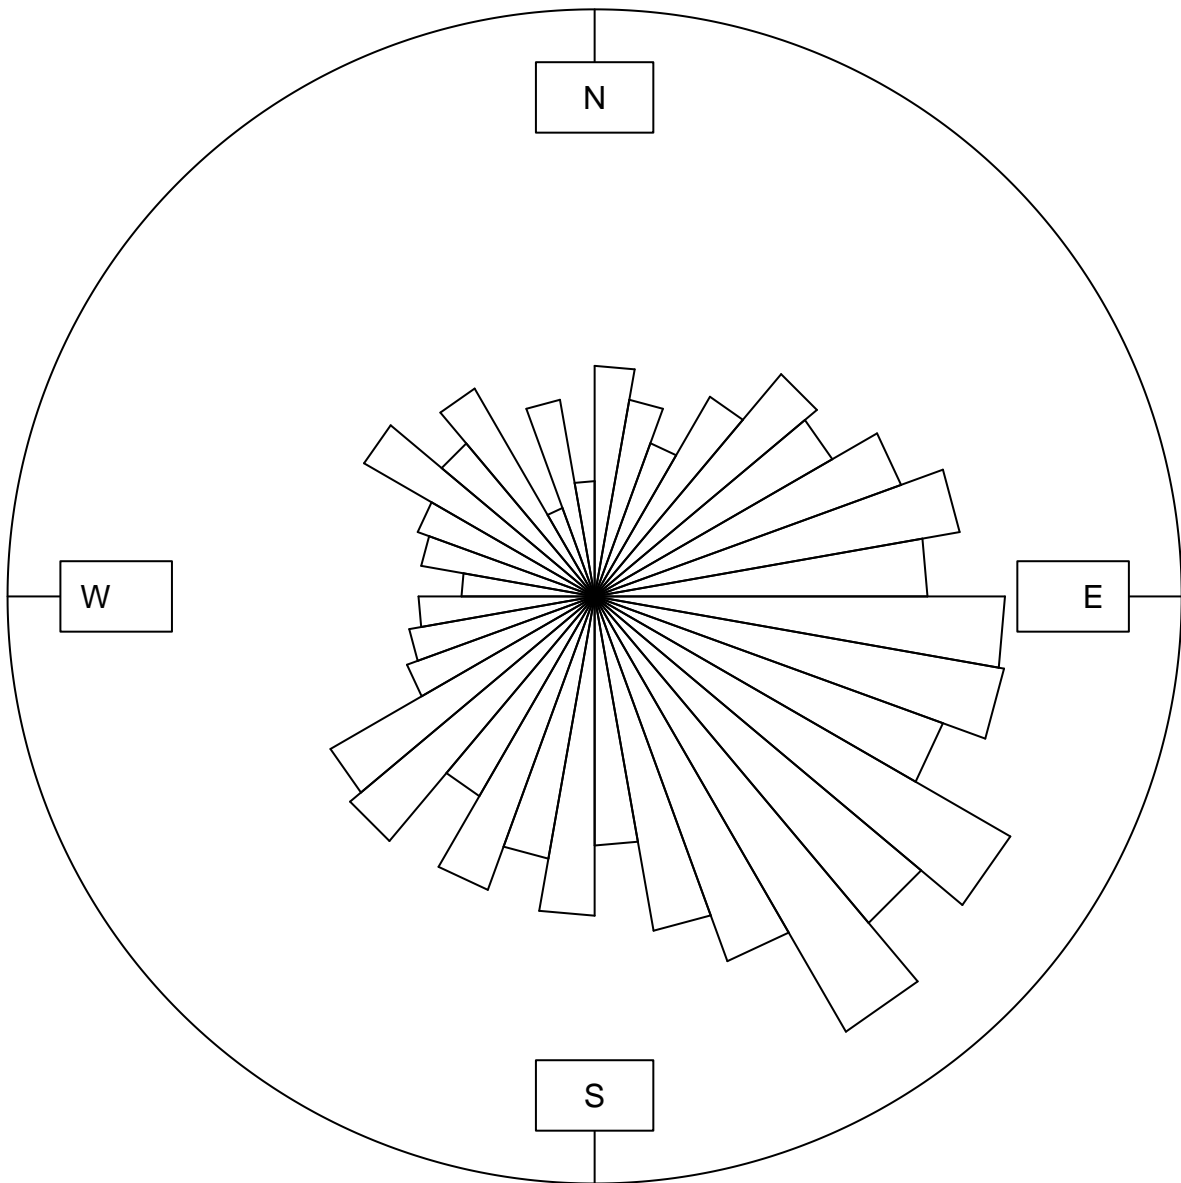

# bootstrap 264

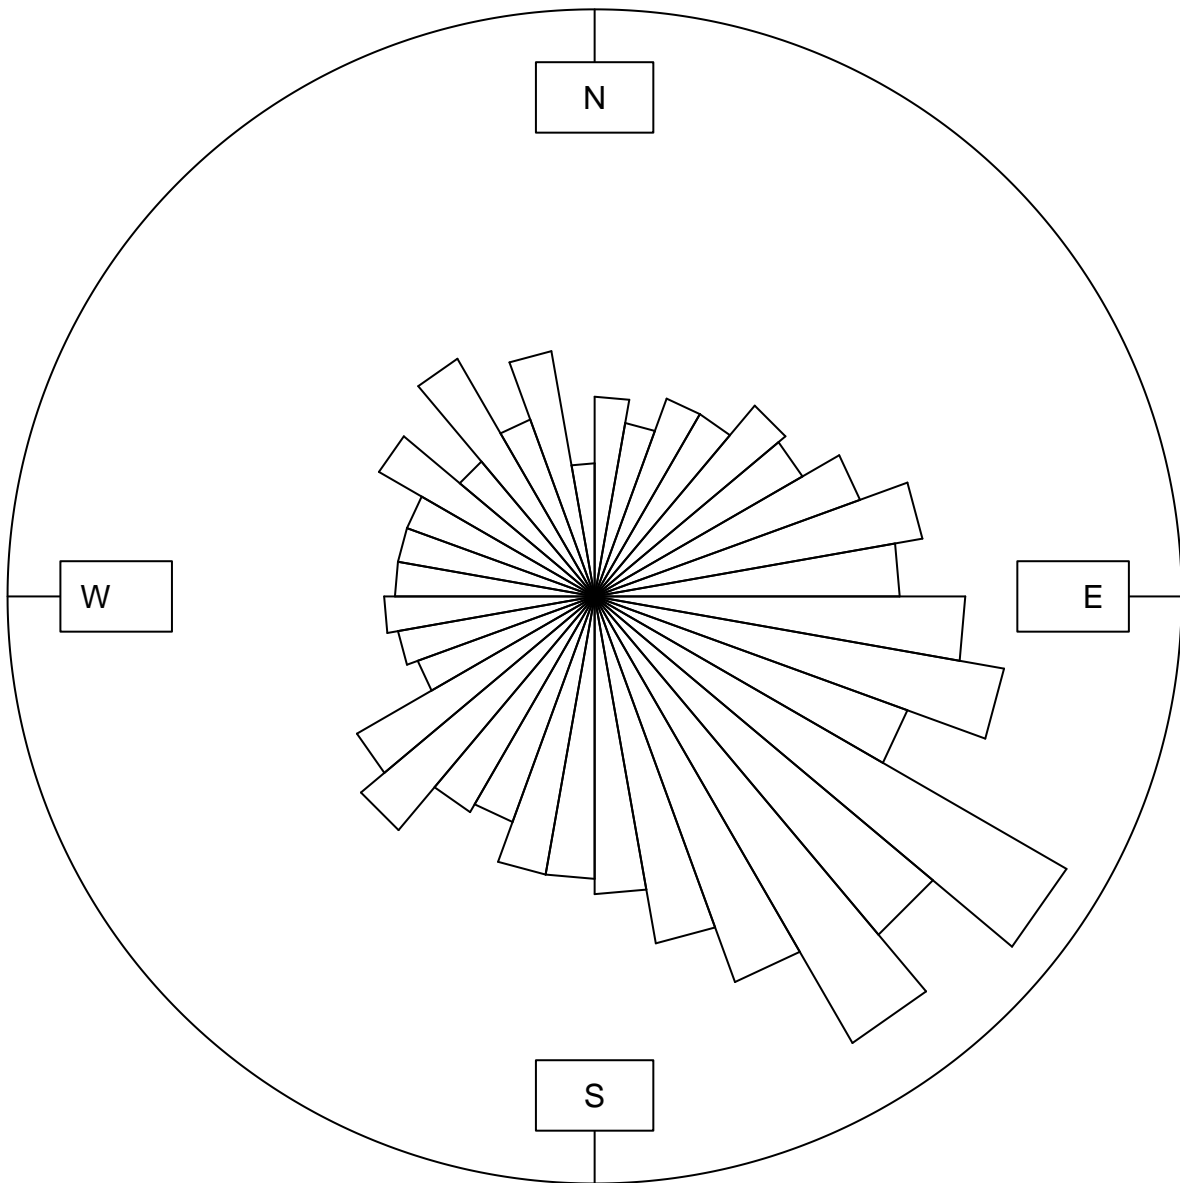



# bootstrap 265

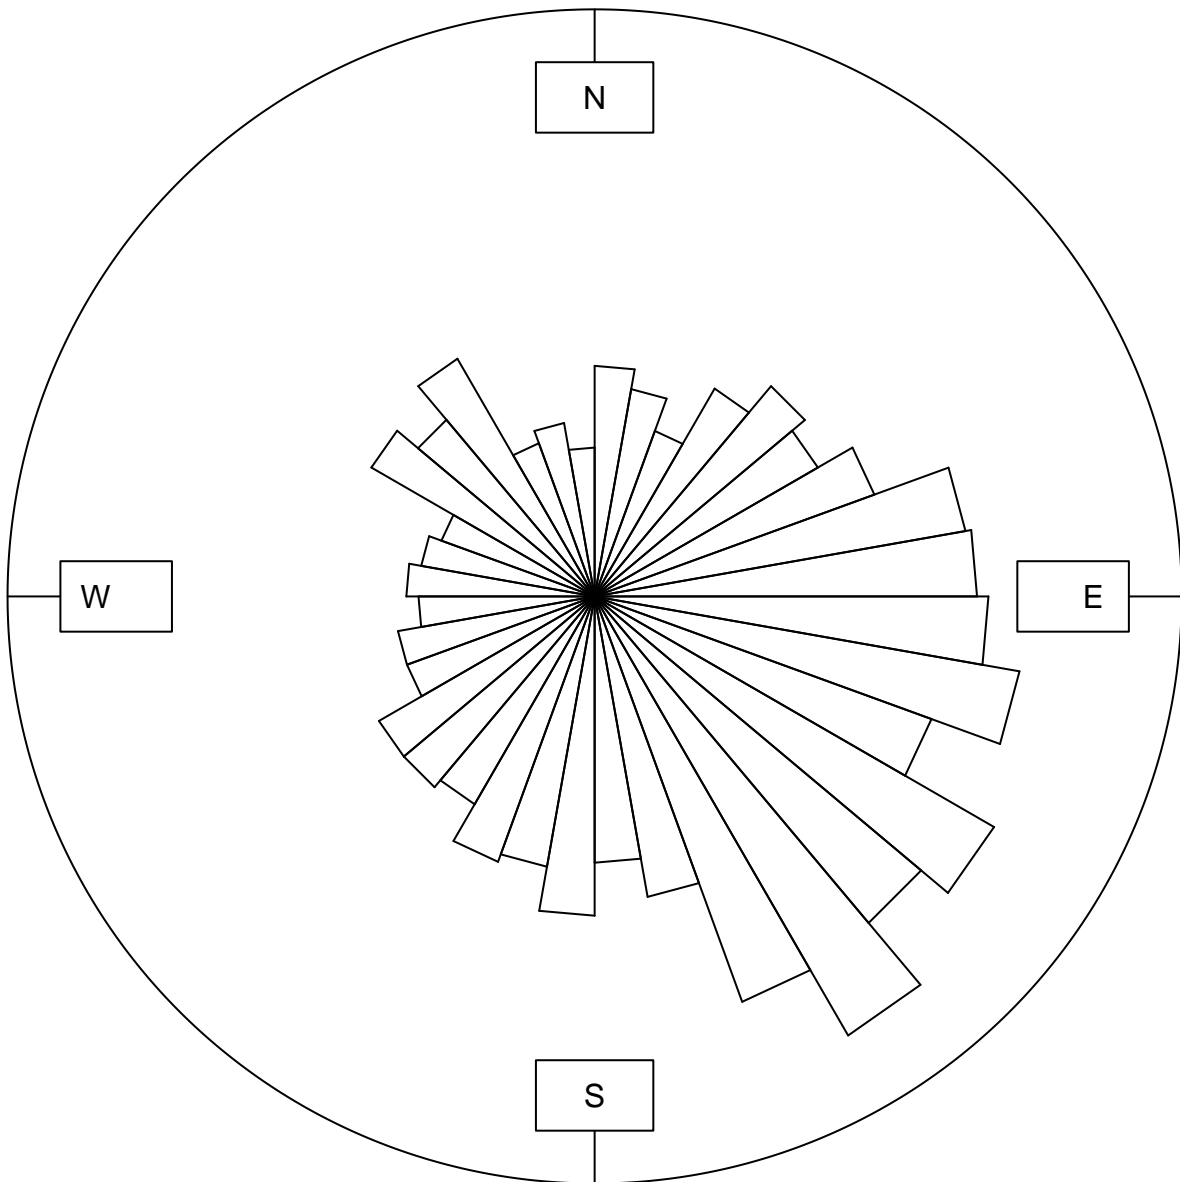

# bootstrap 266

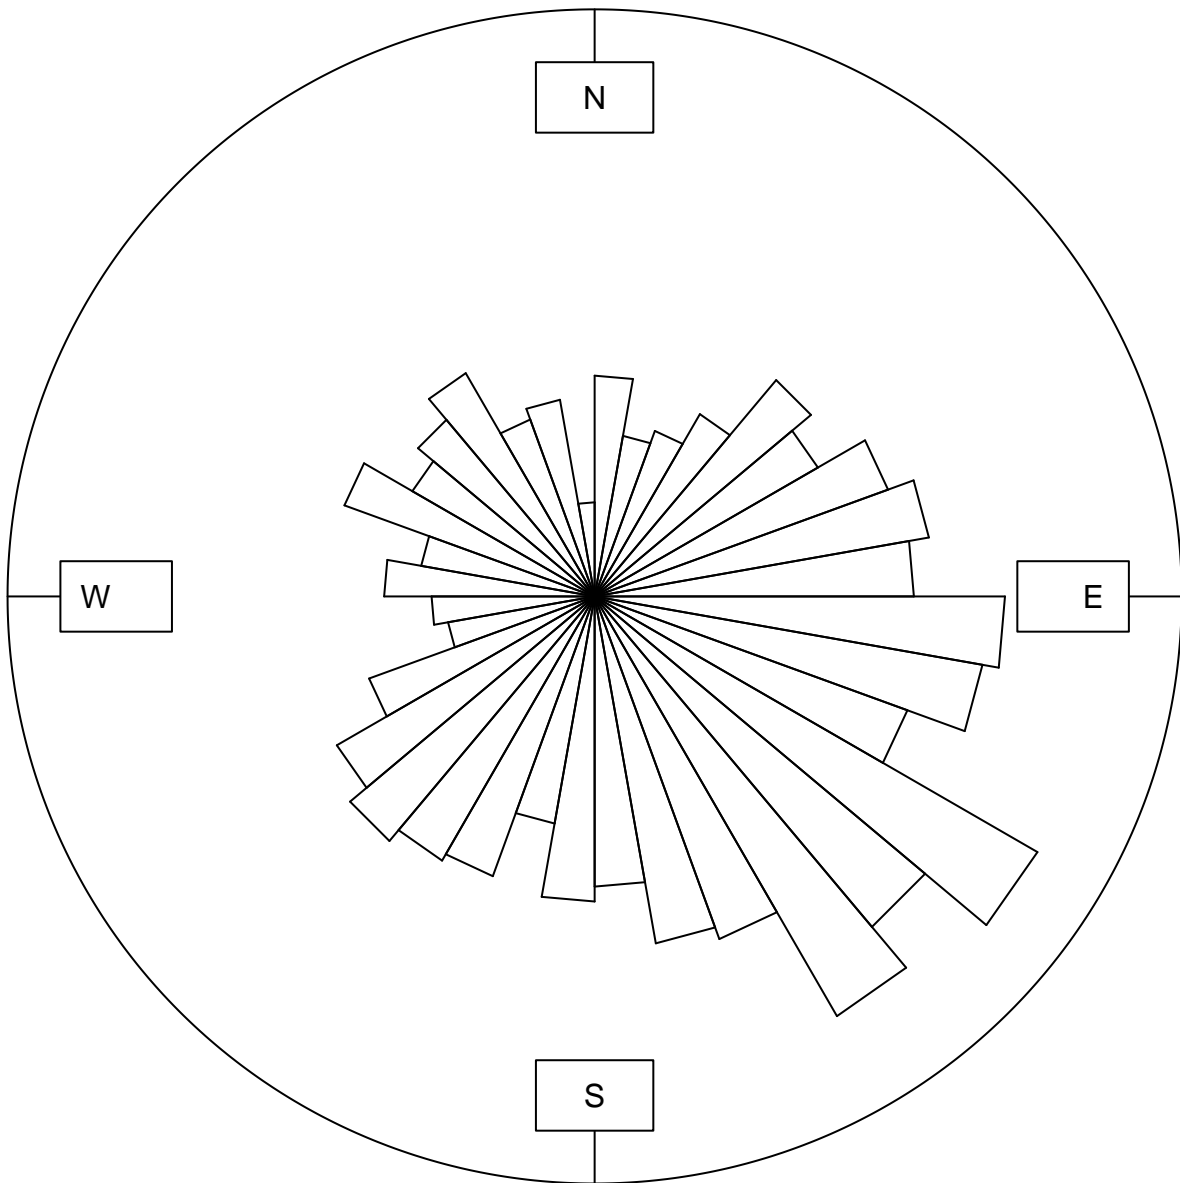

**bootstrap 267**

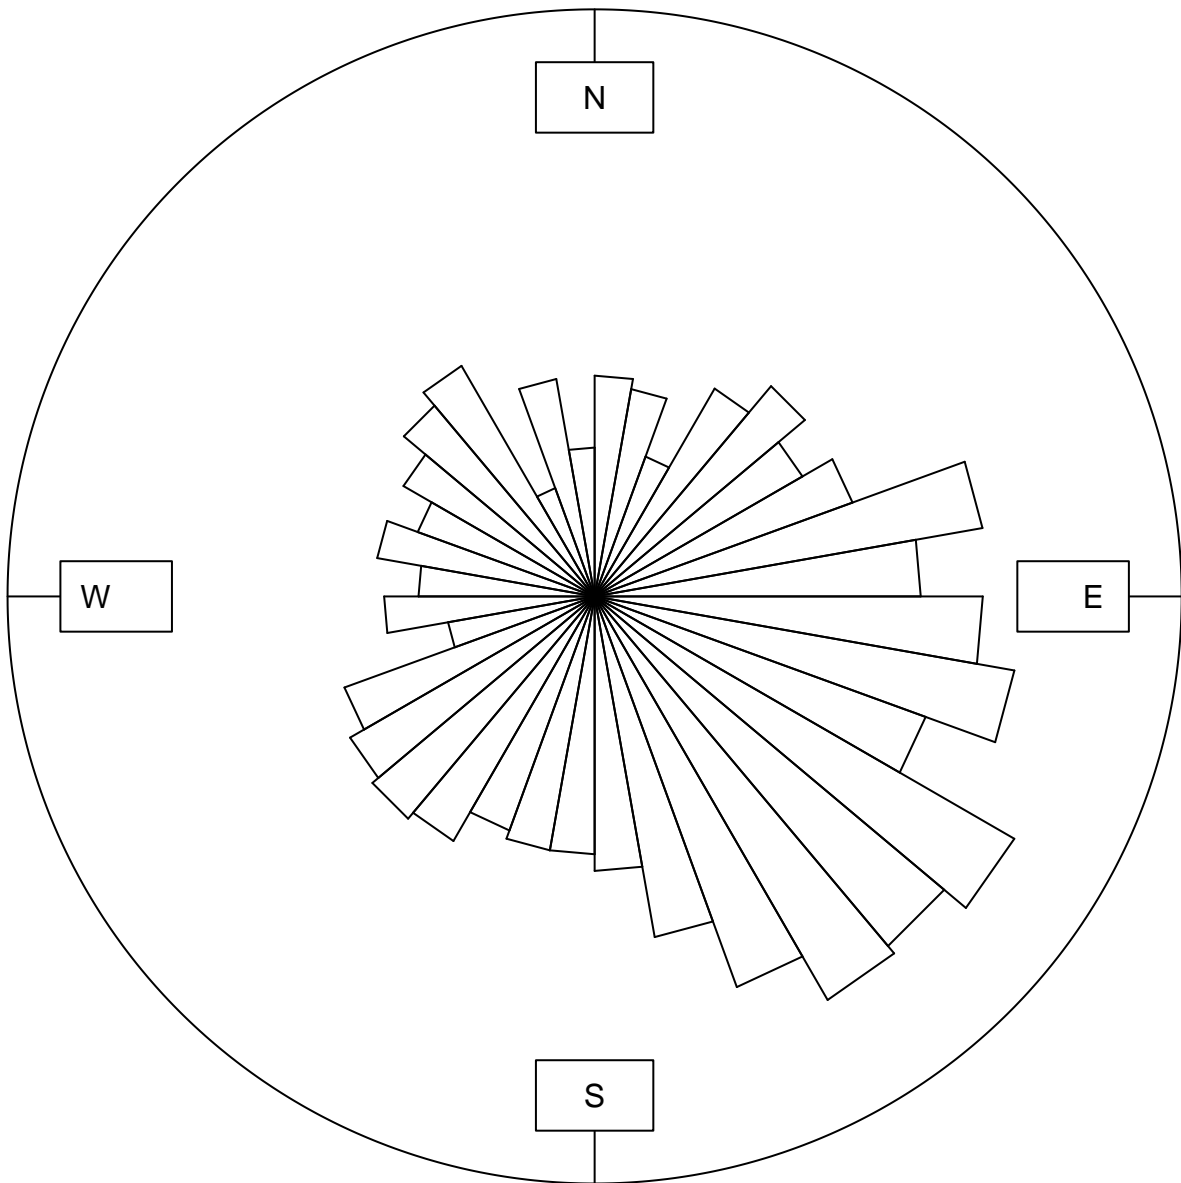

# bootstrap 268

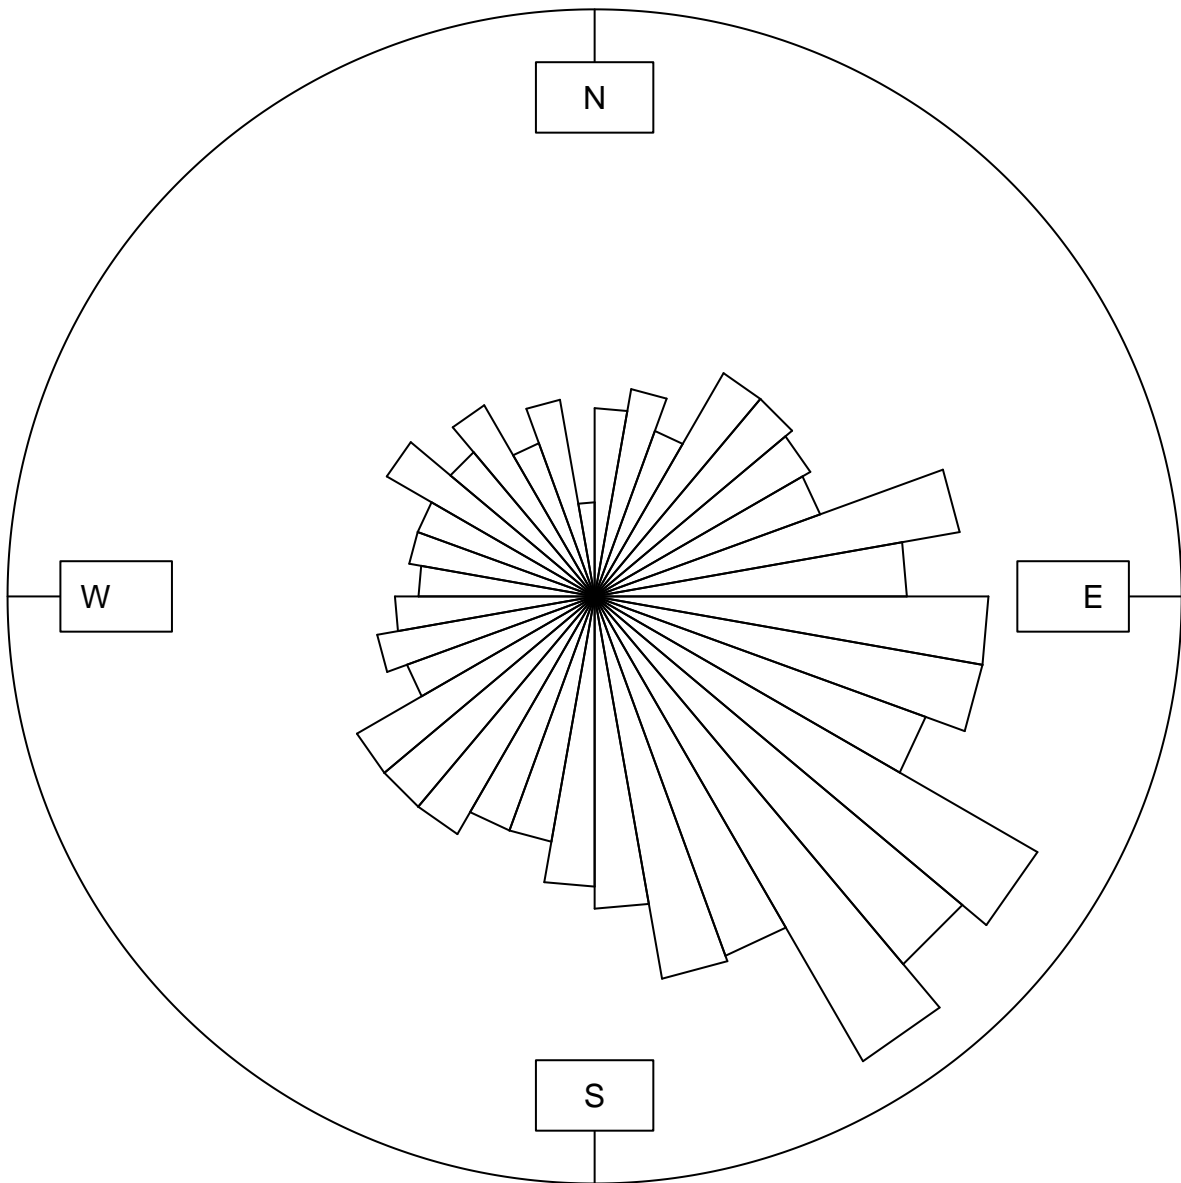

# bootstrap 269

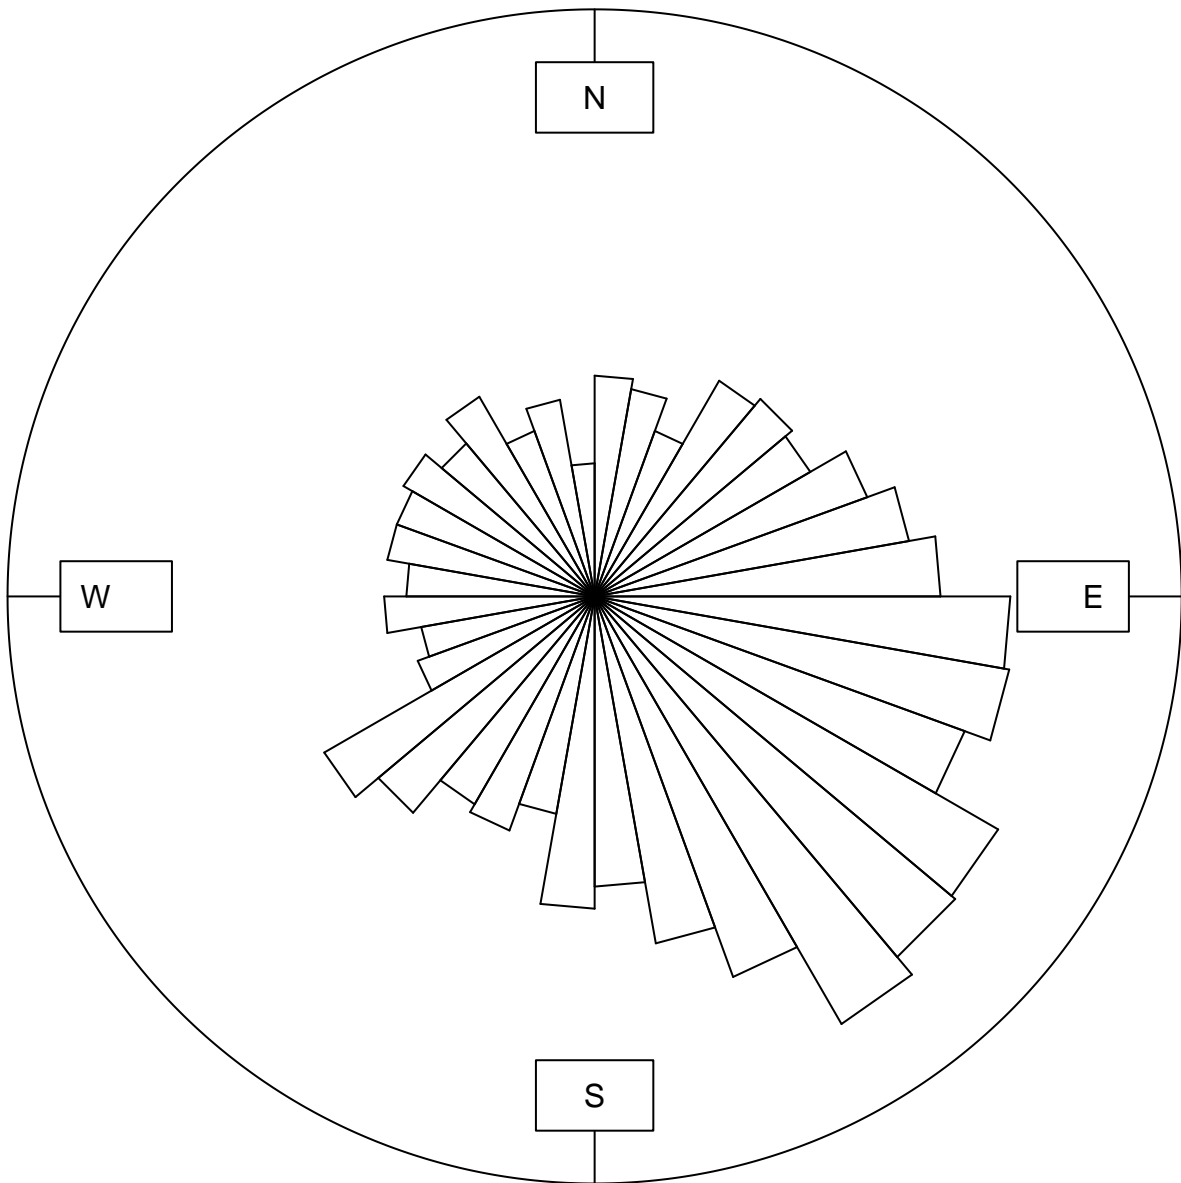

# bootstrap 270

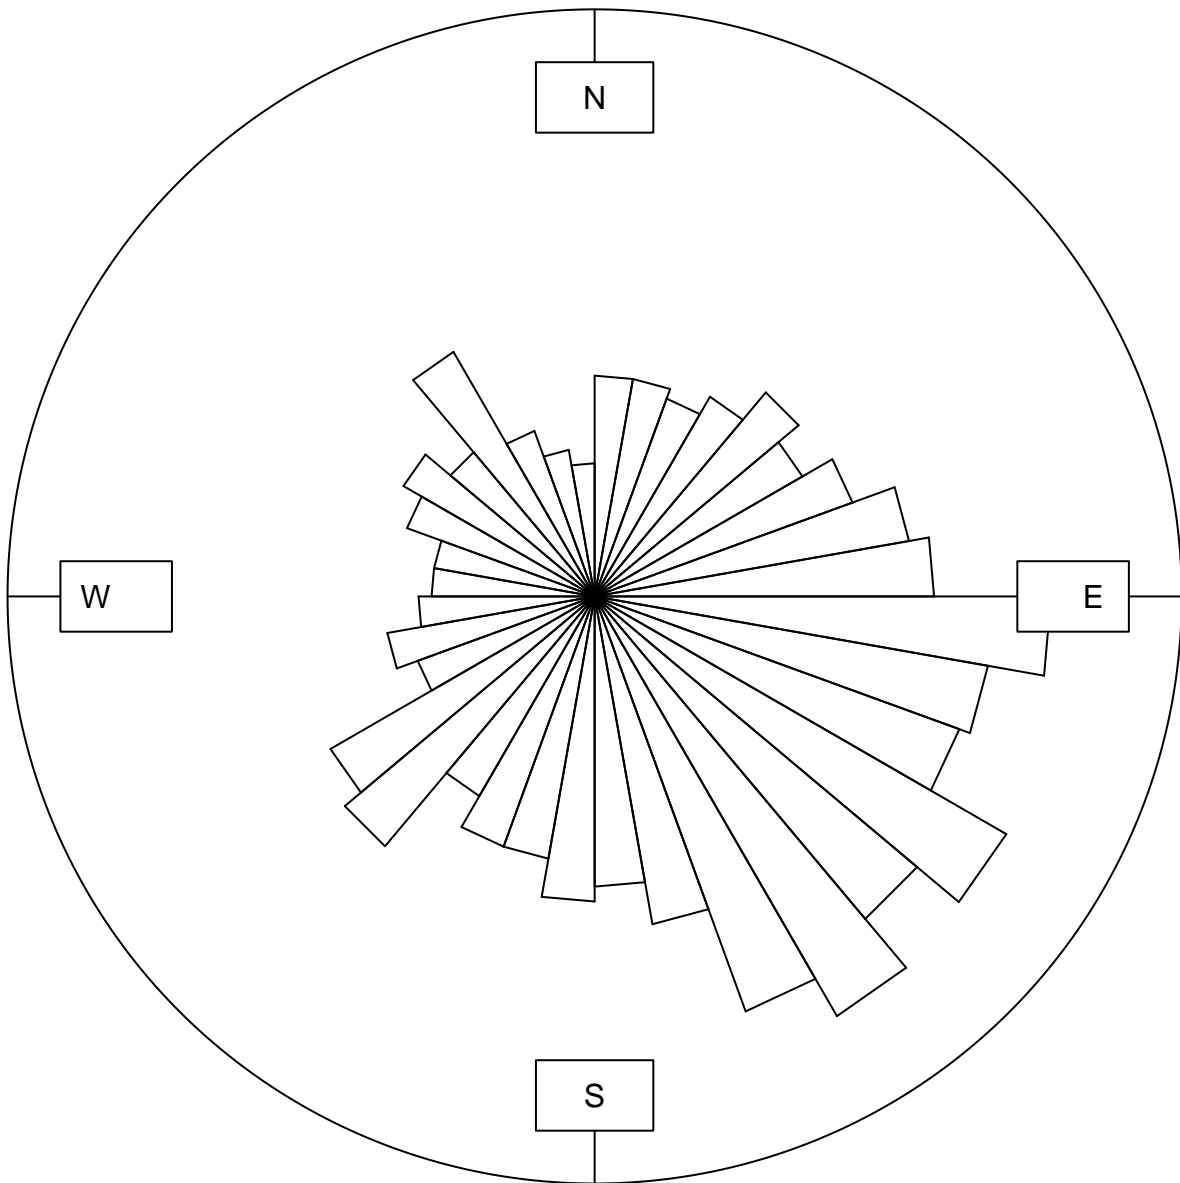

# bootstrap 271

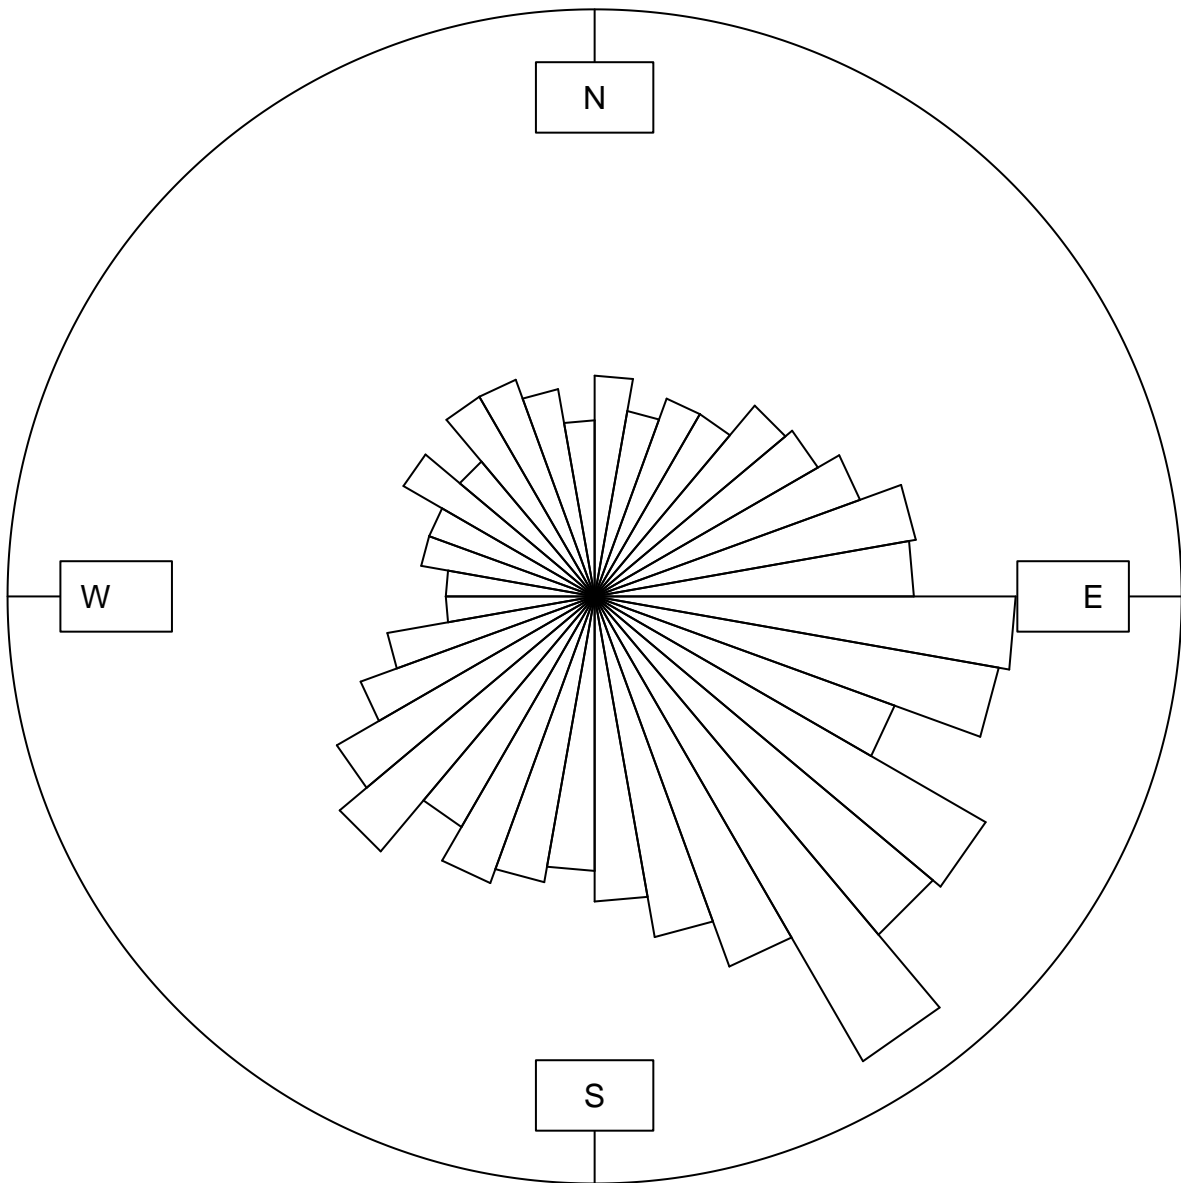

# bootstrap 272

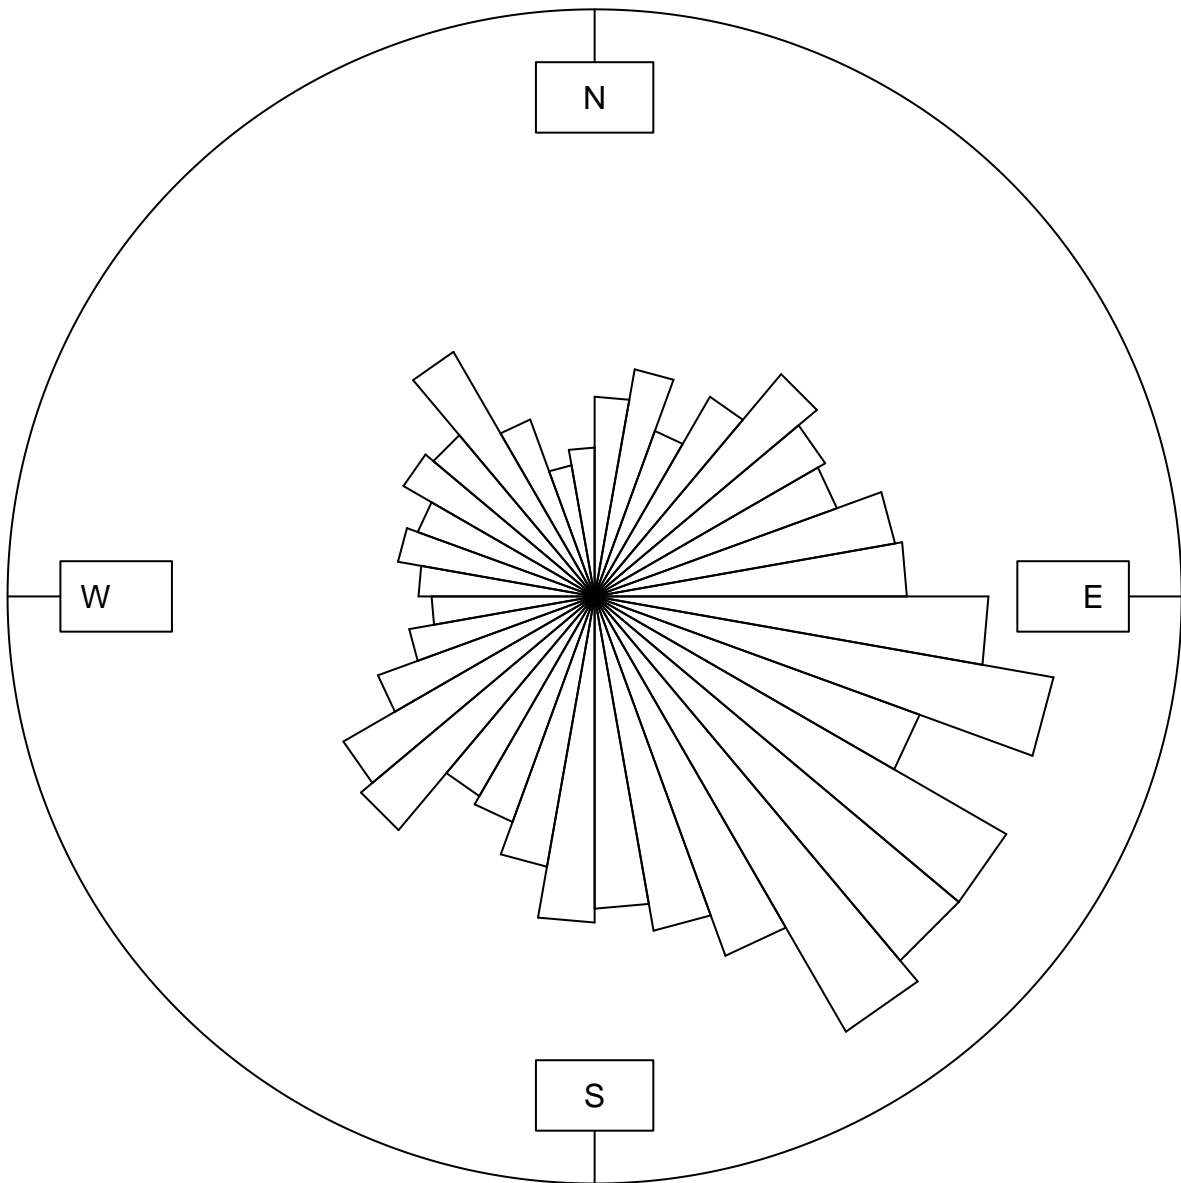



# bootstrap 273

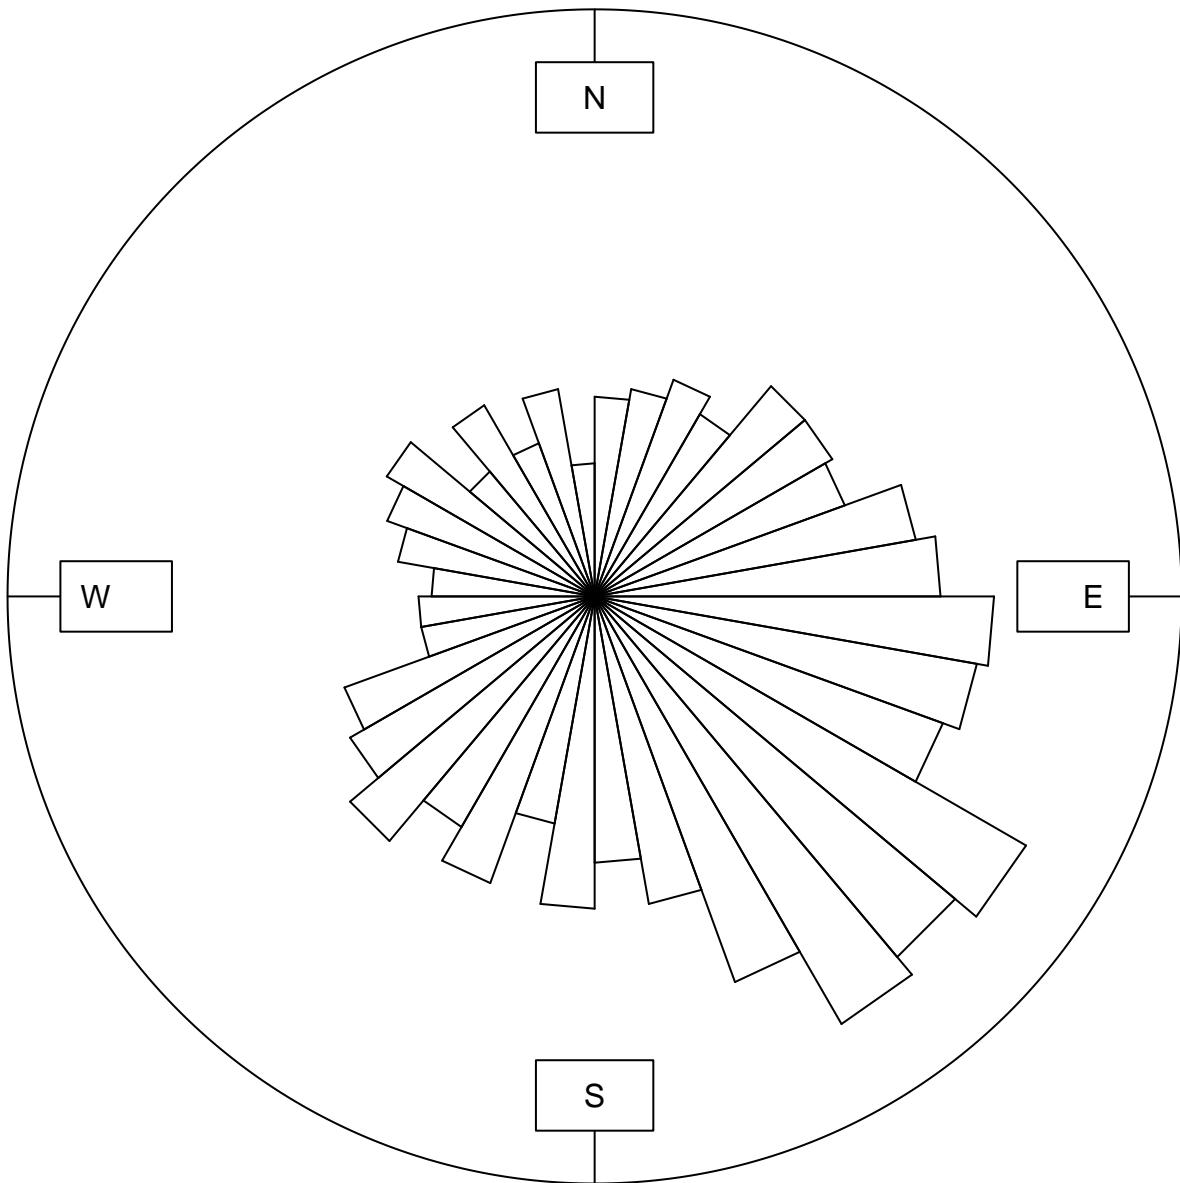

# bootstrap 274

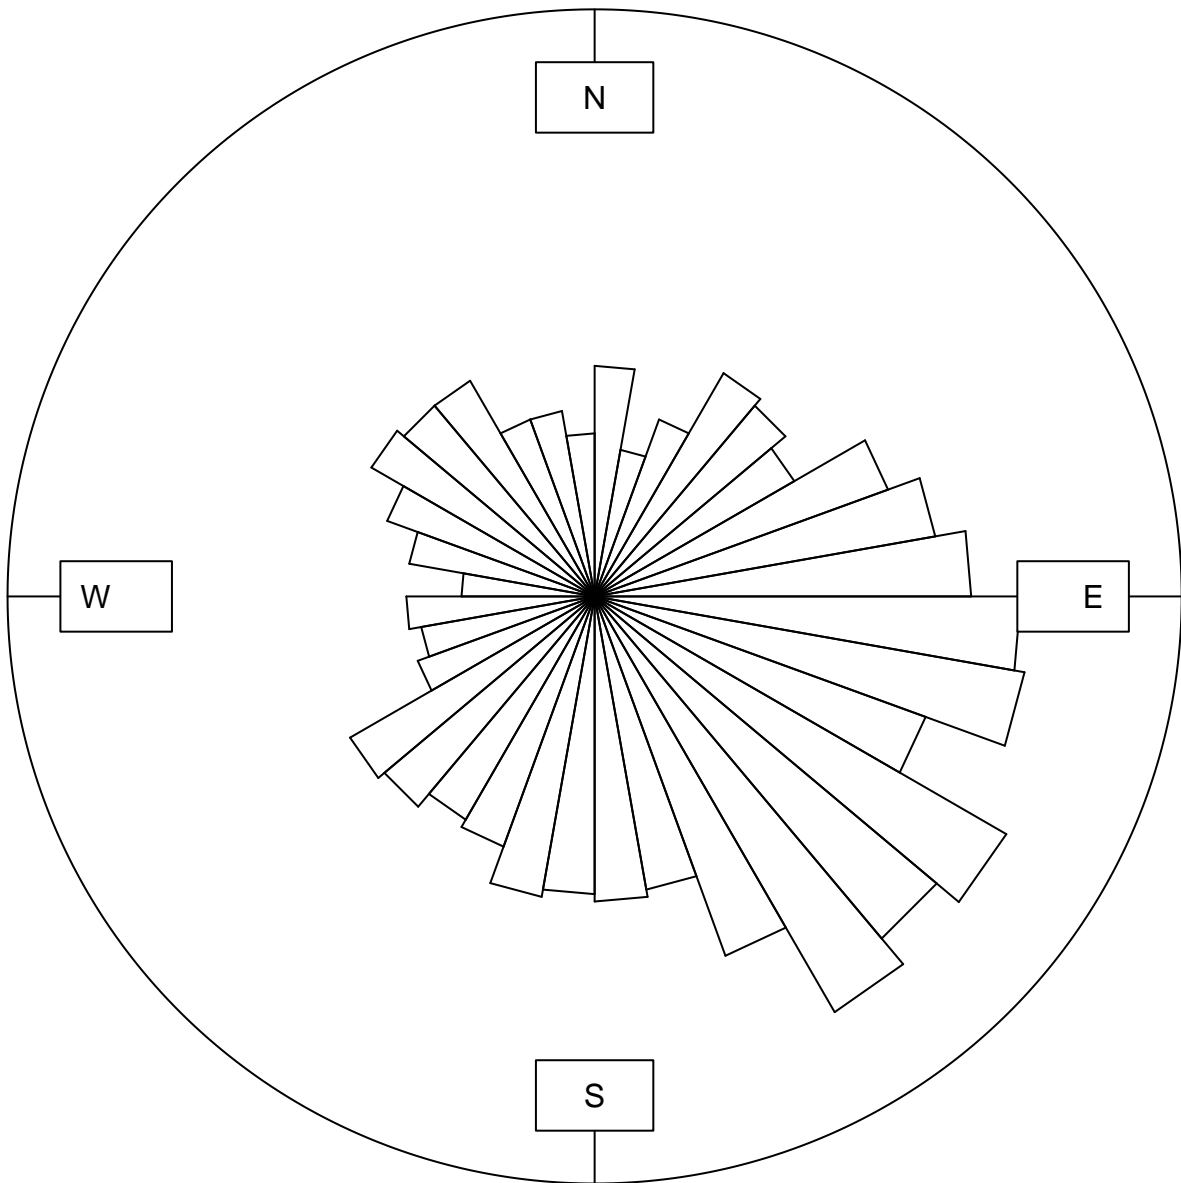

**bootstrap 275**

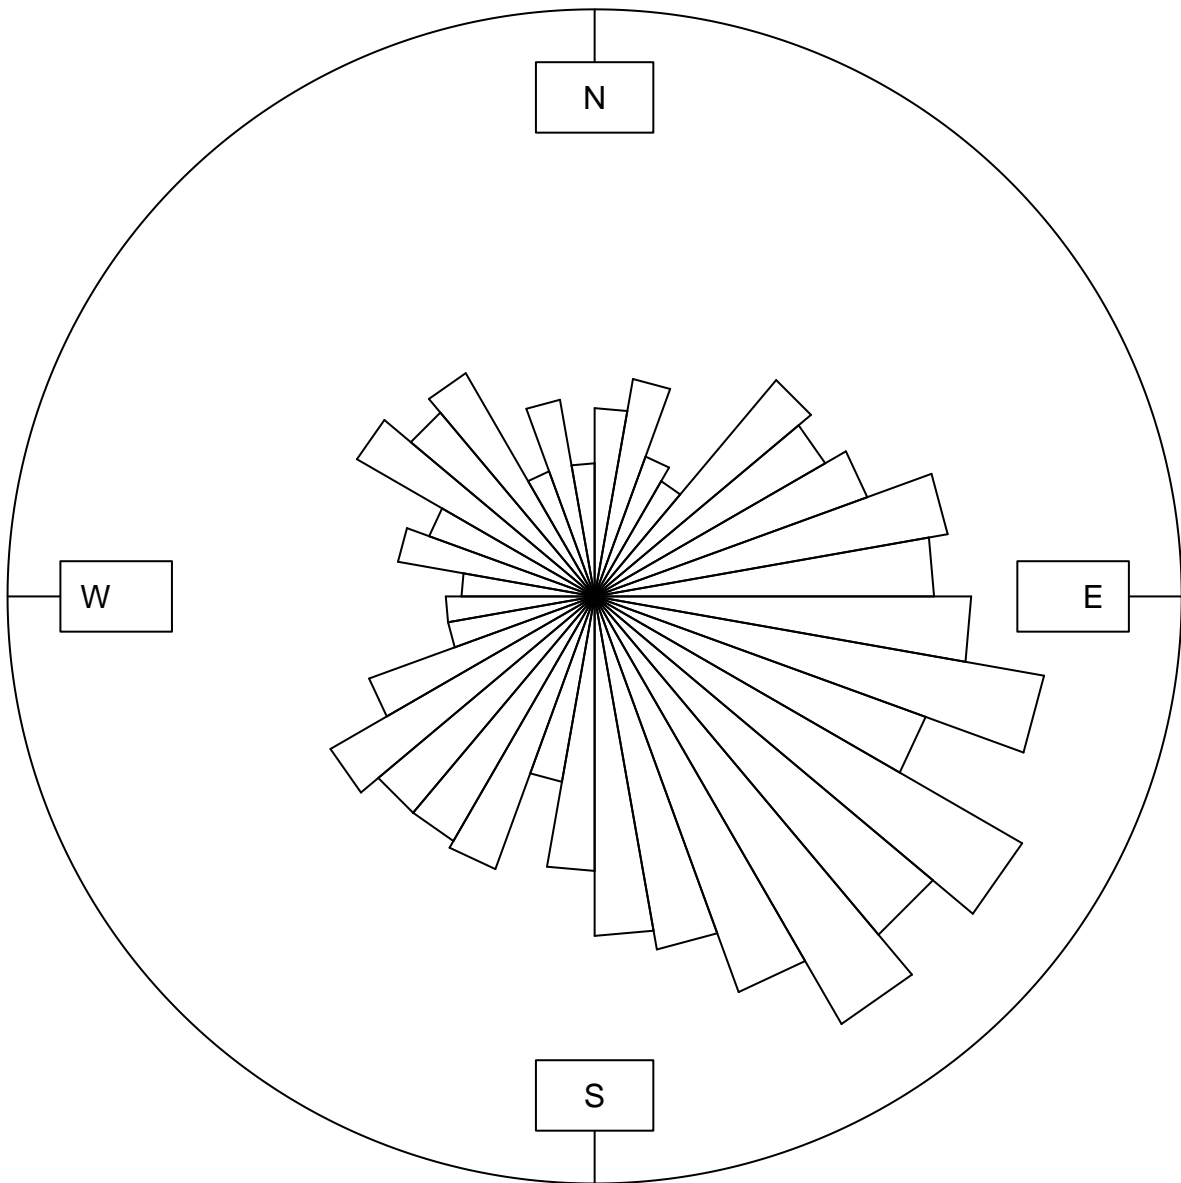

# bootstrap 276

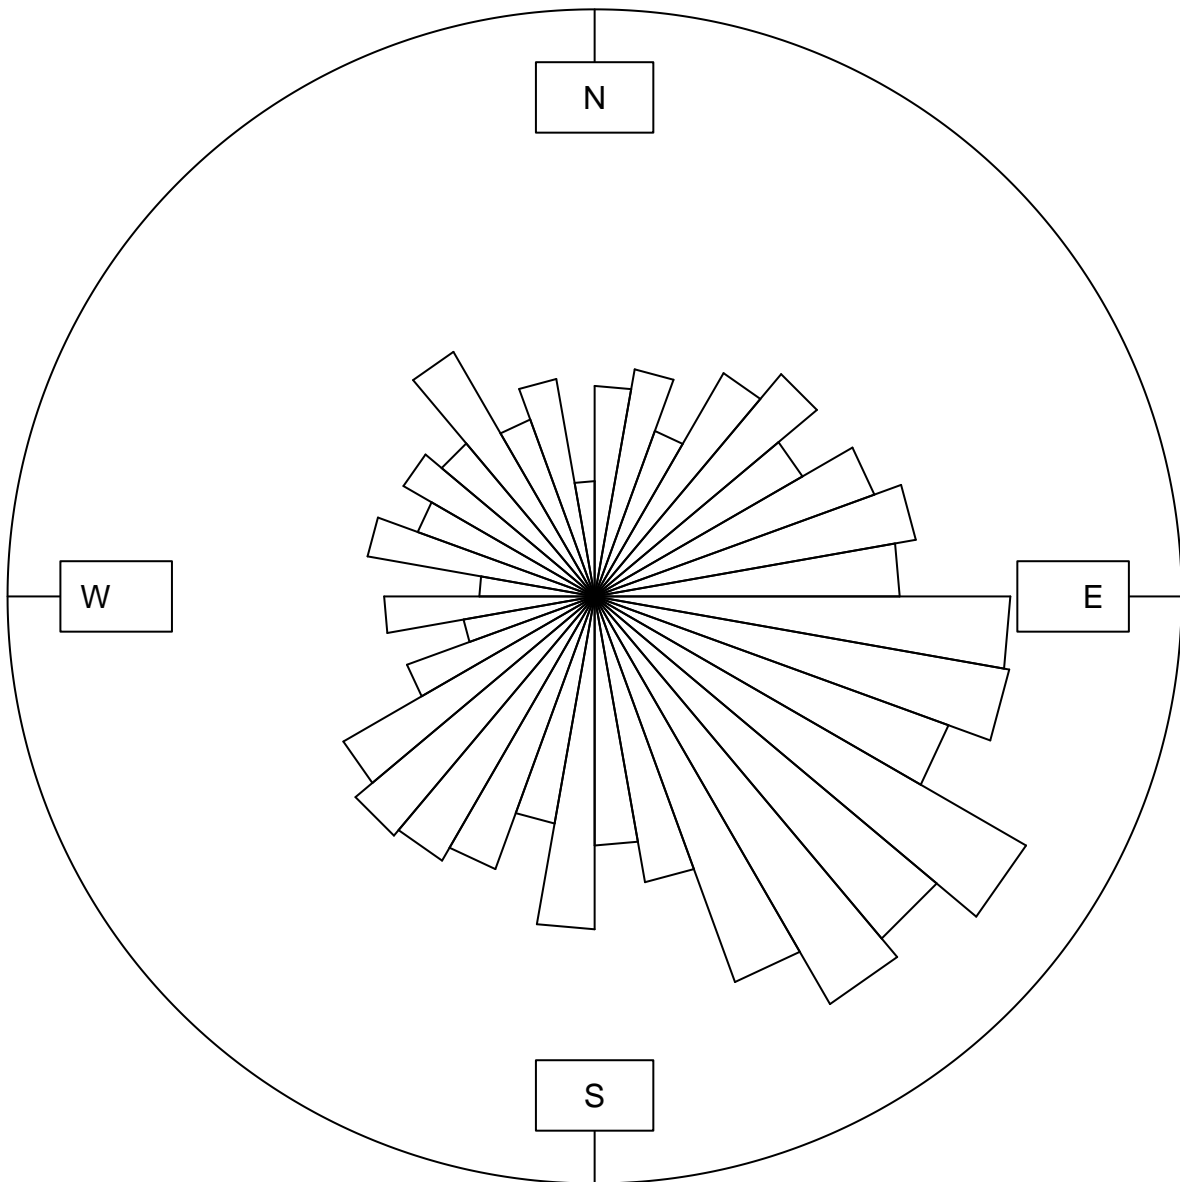

# bootstrap 277

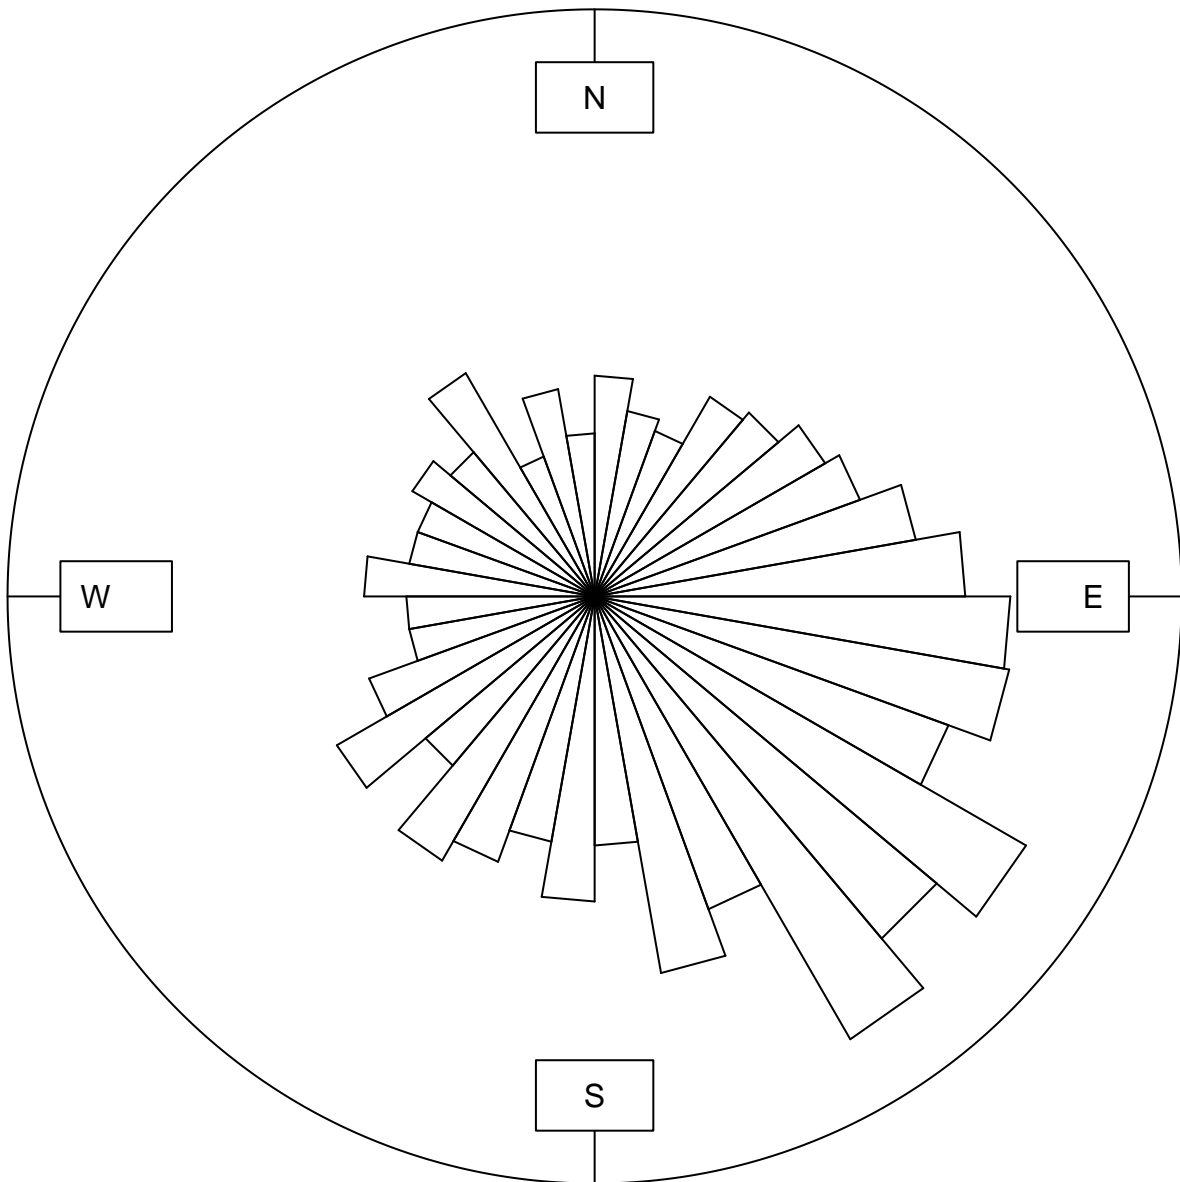

# bootstrap 278

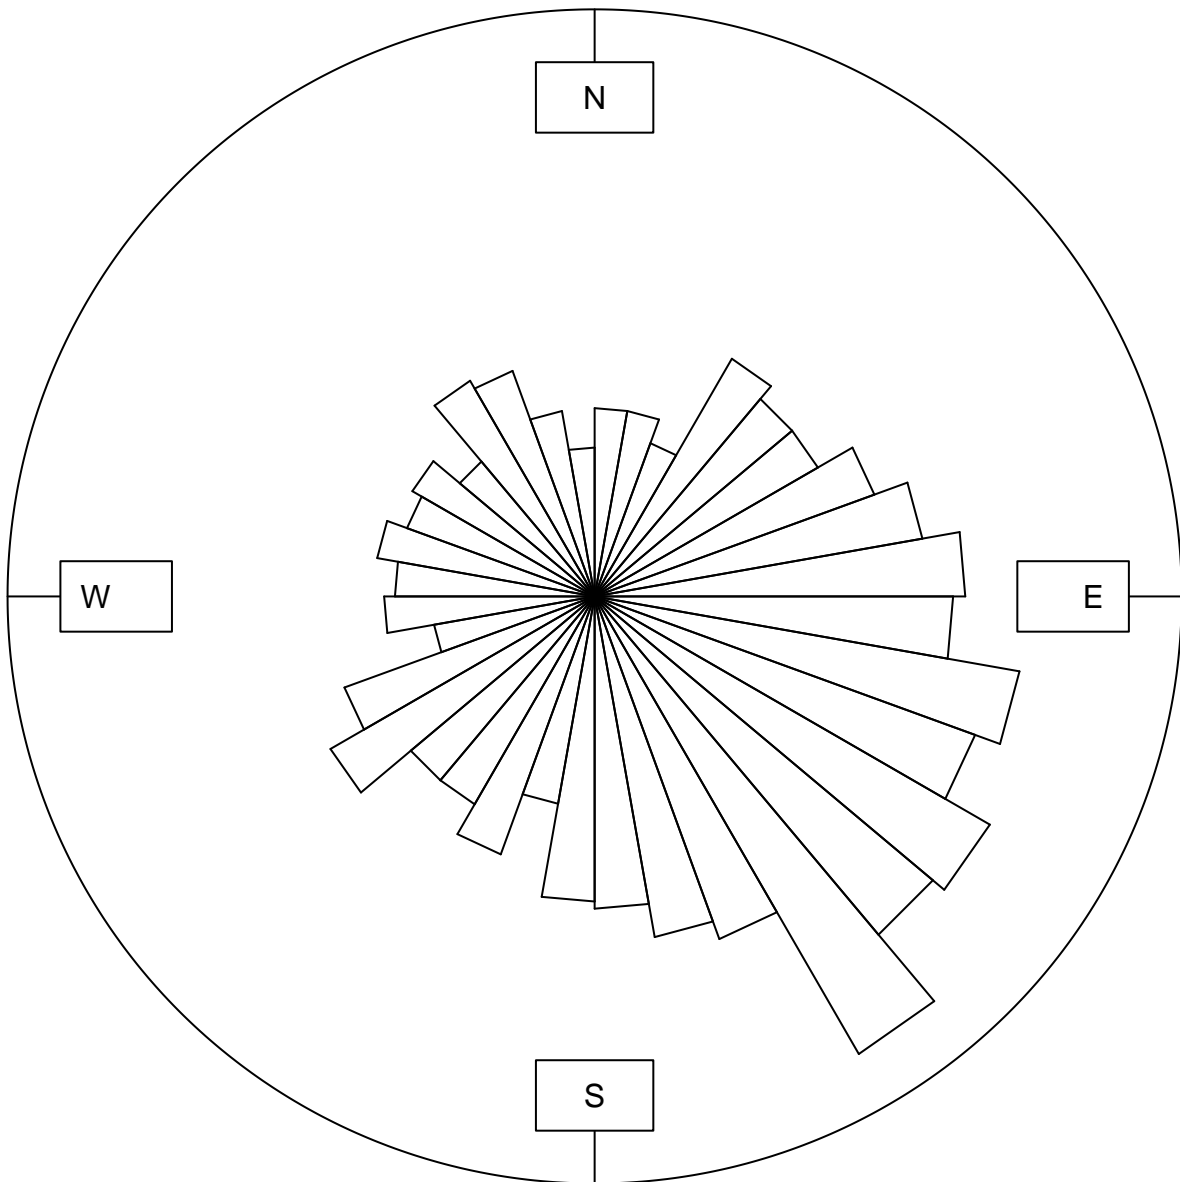

# bootstrap 279

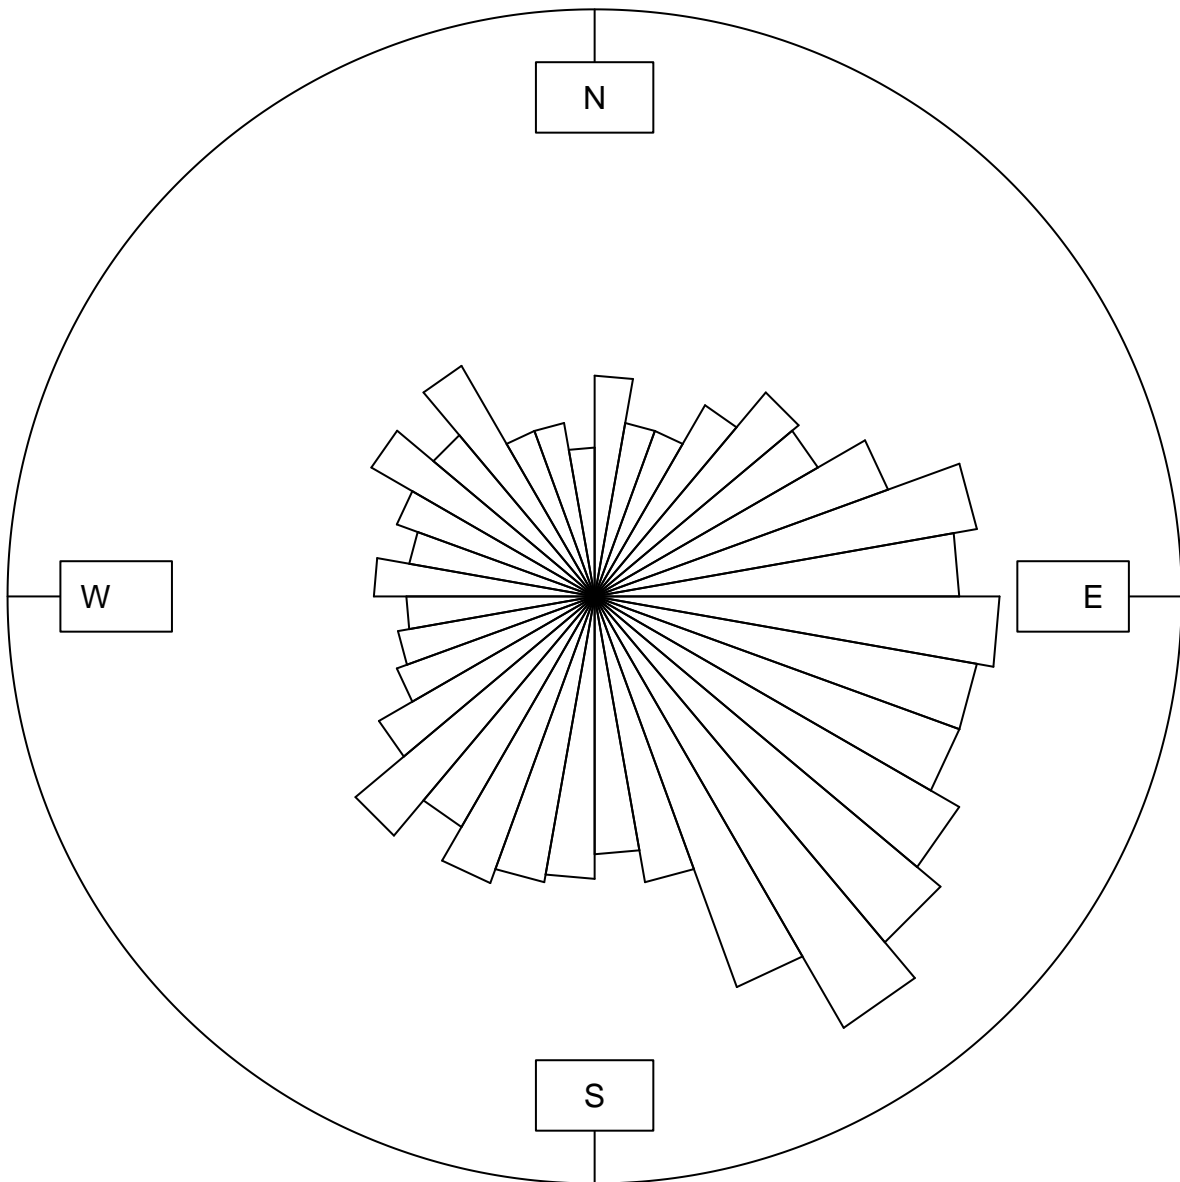

# bootstrap 280

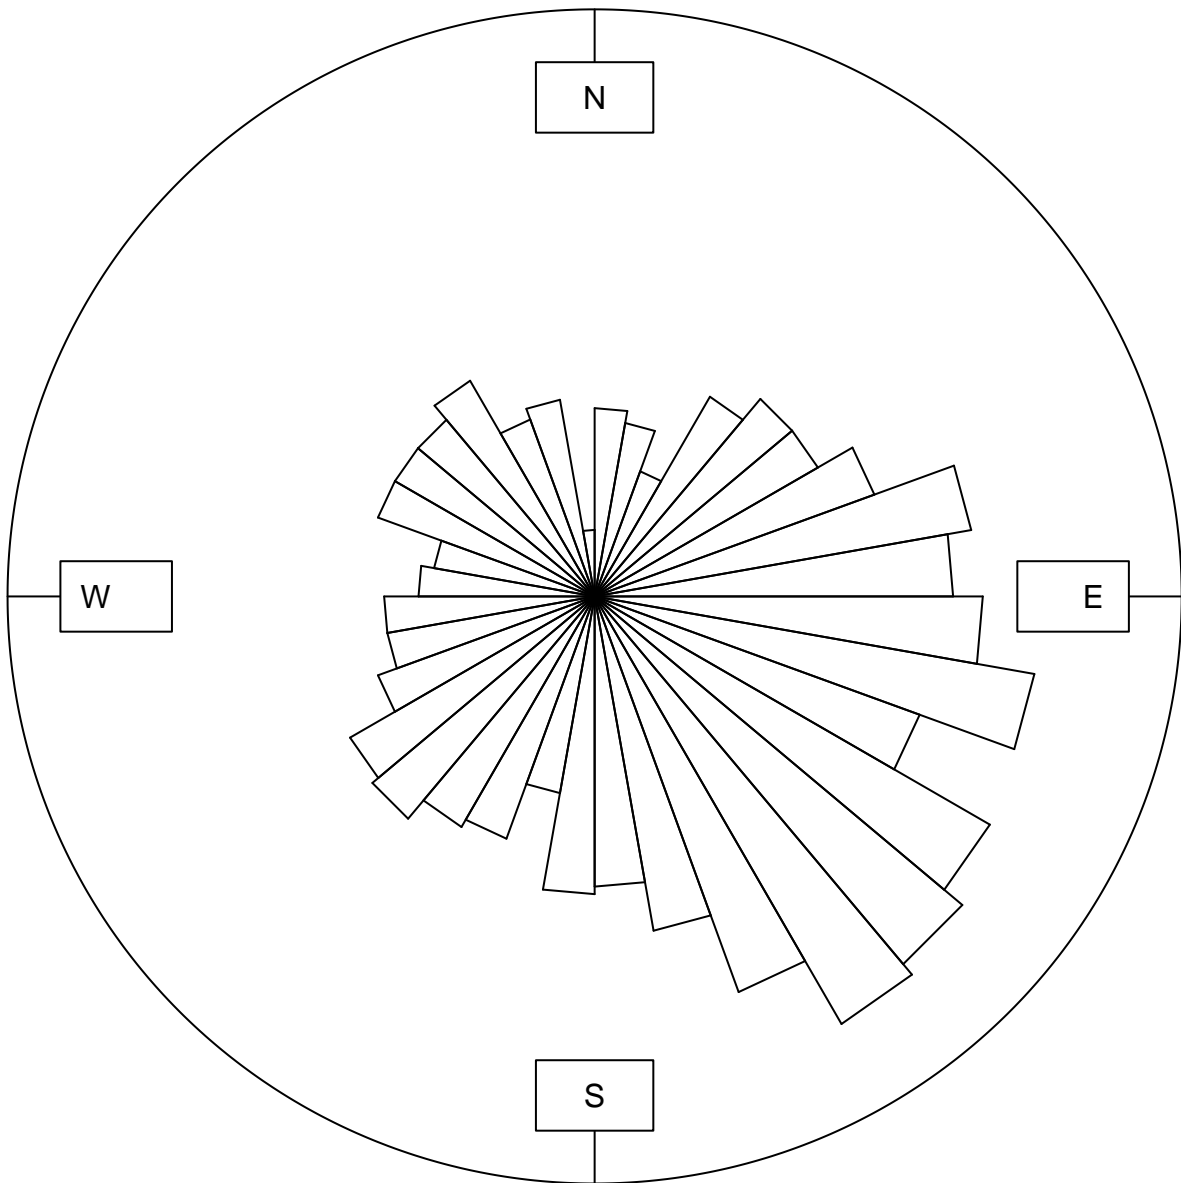



# bootstrap 281

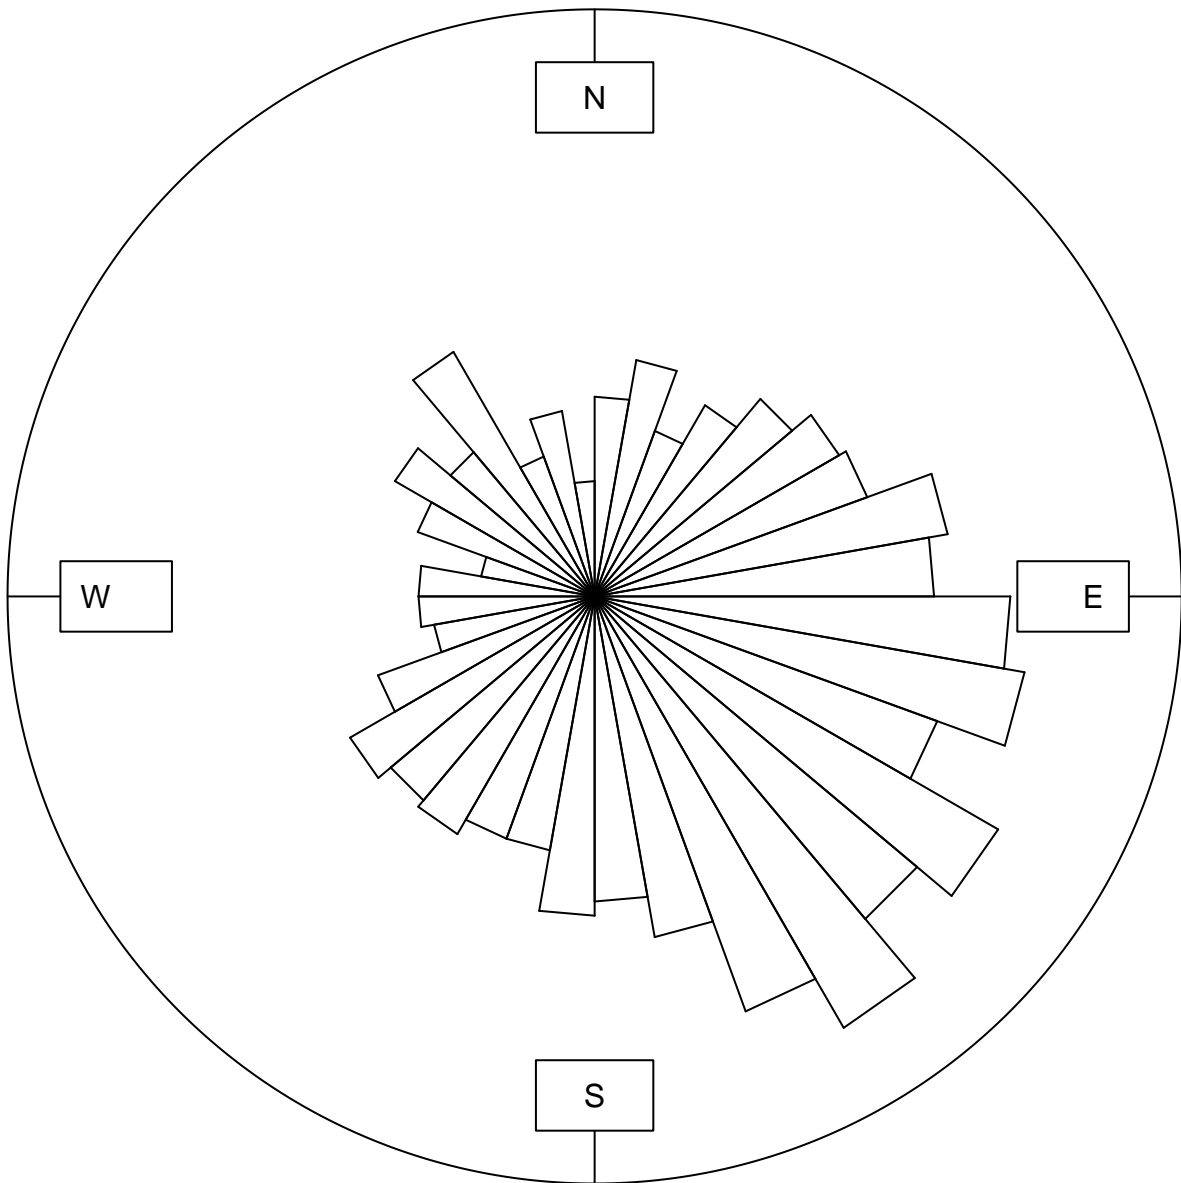

# bootstrap 282

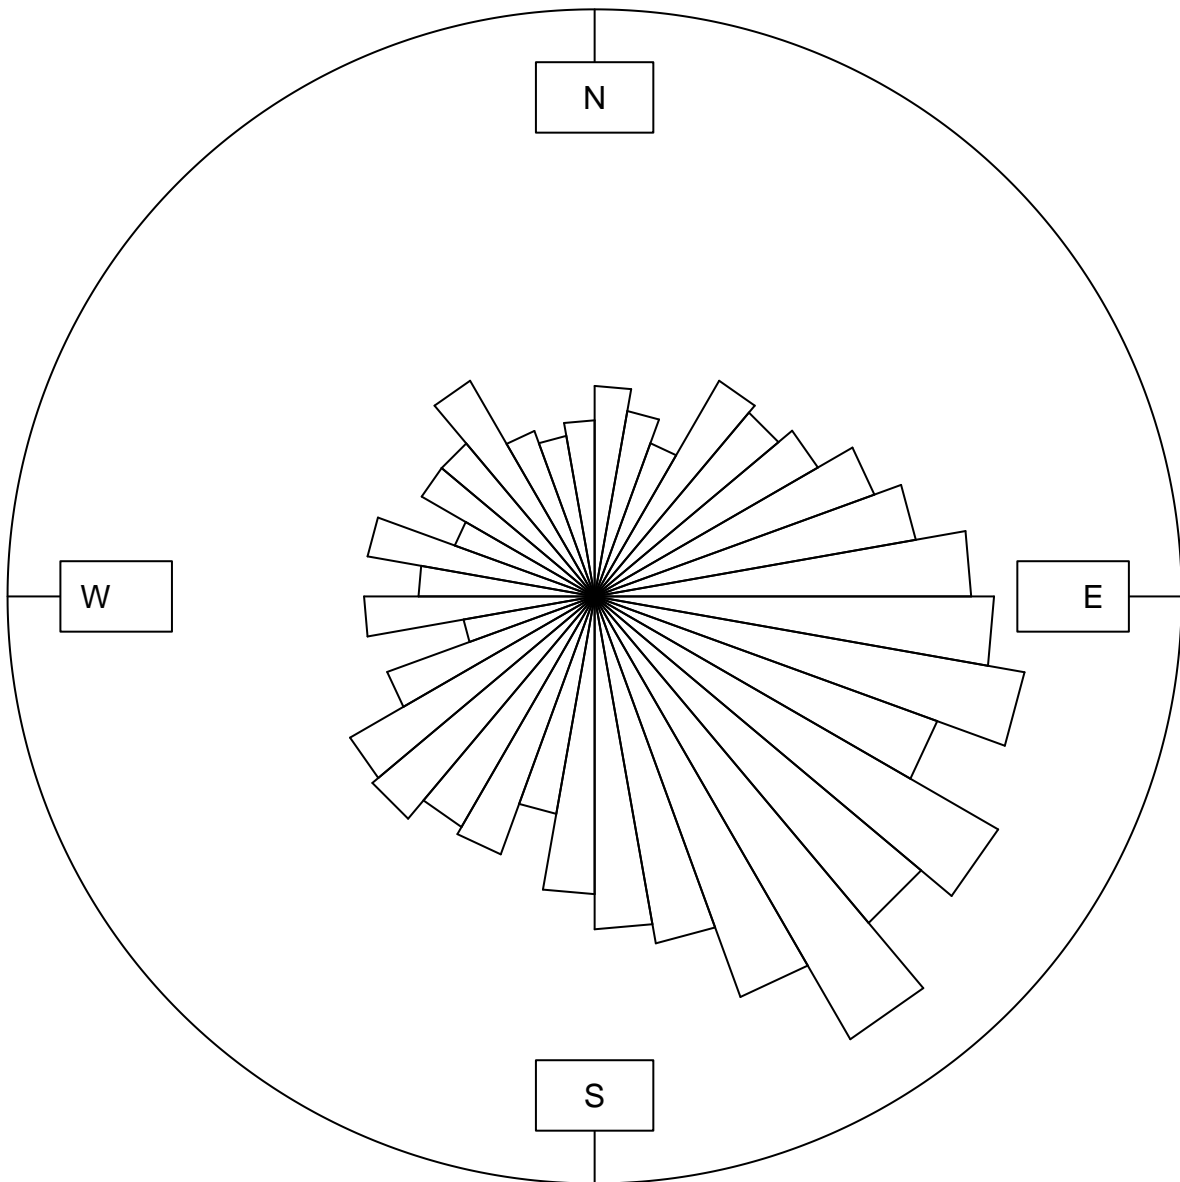

**bootstrap 283**

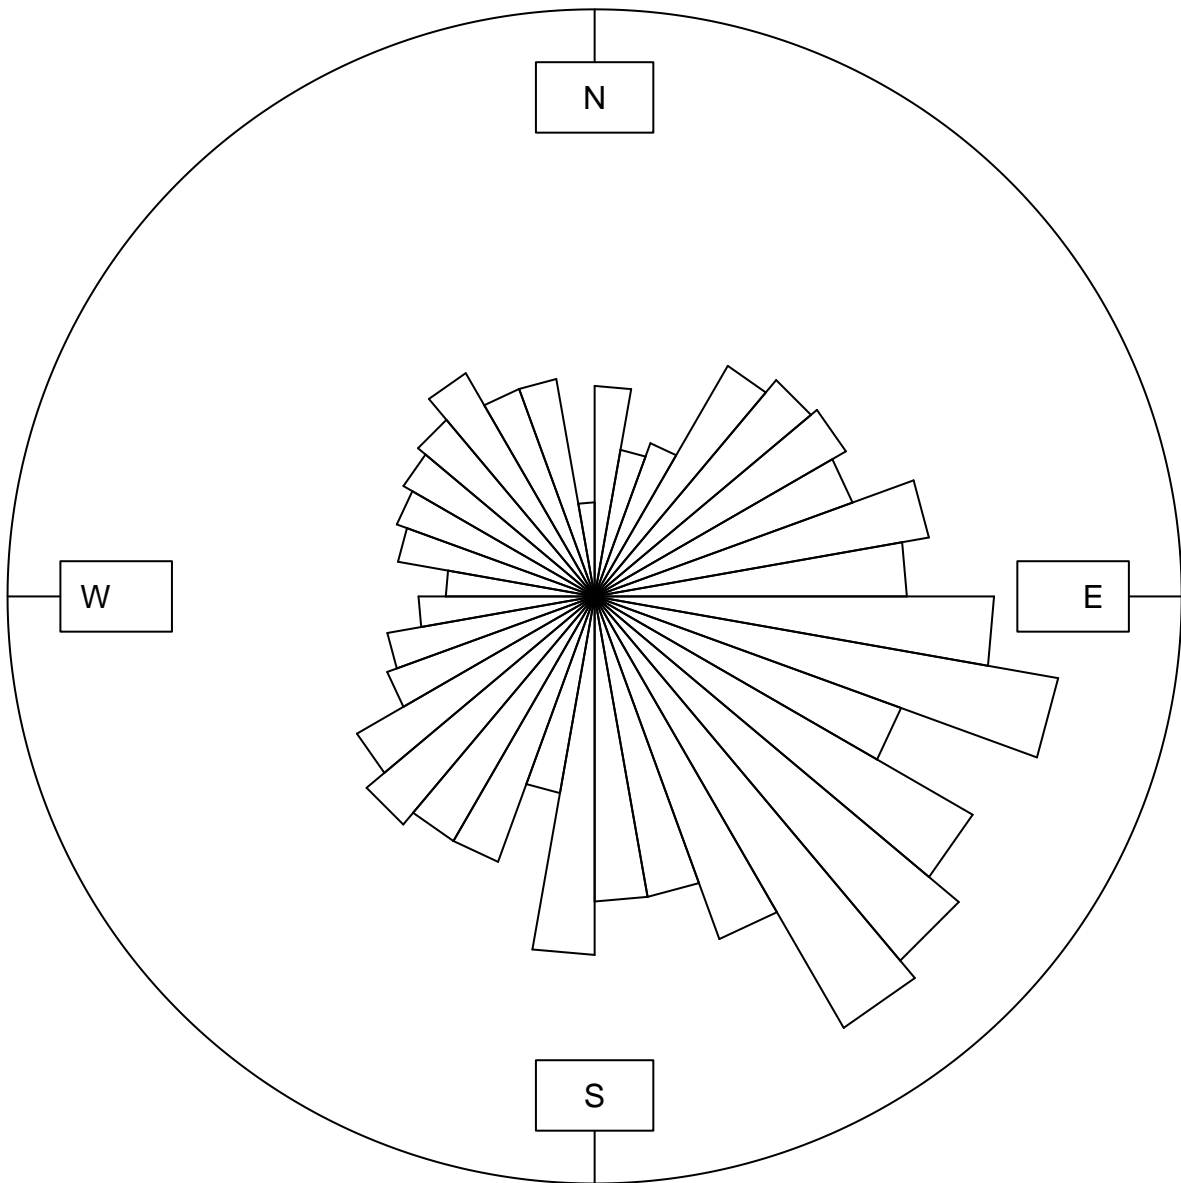

**bootstrap 284**

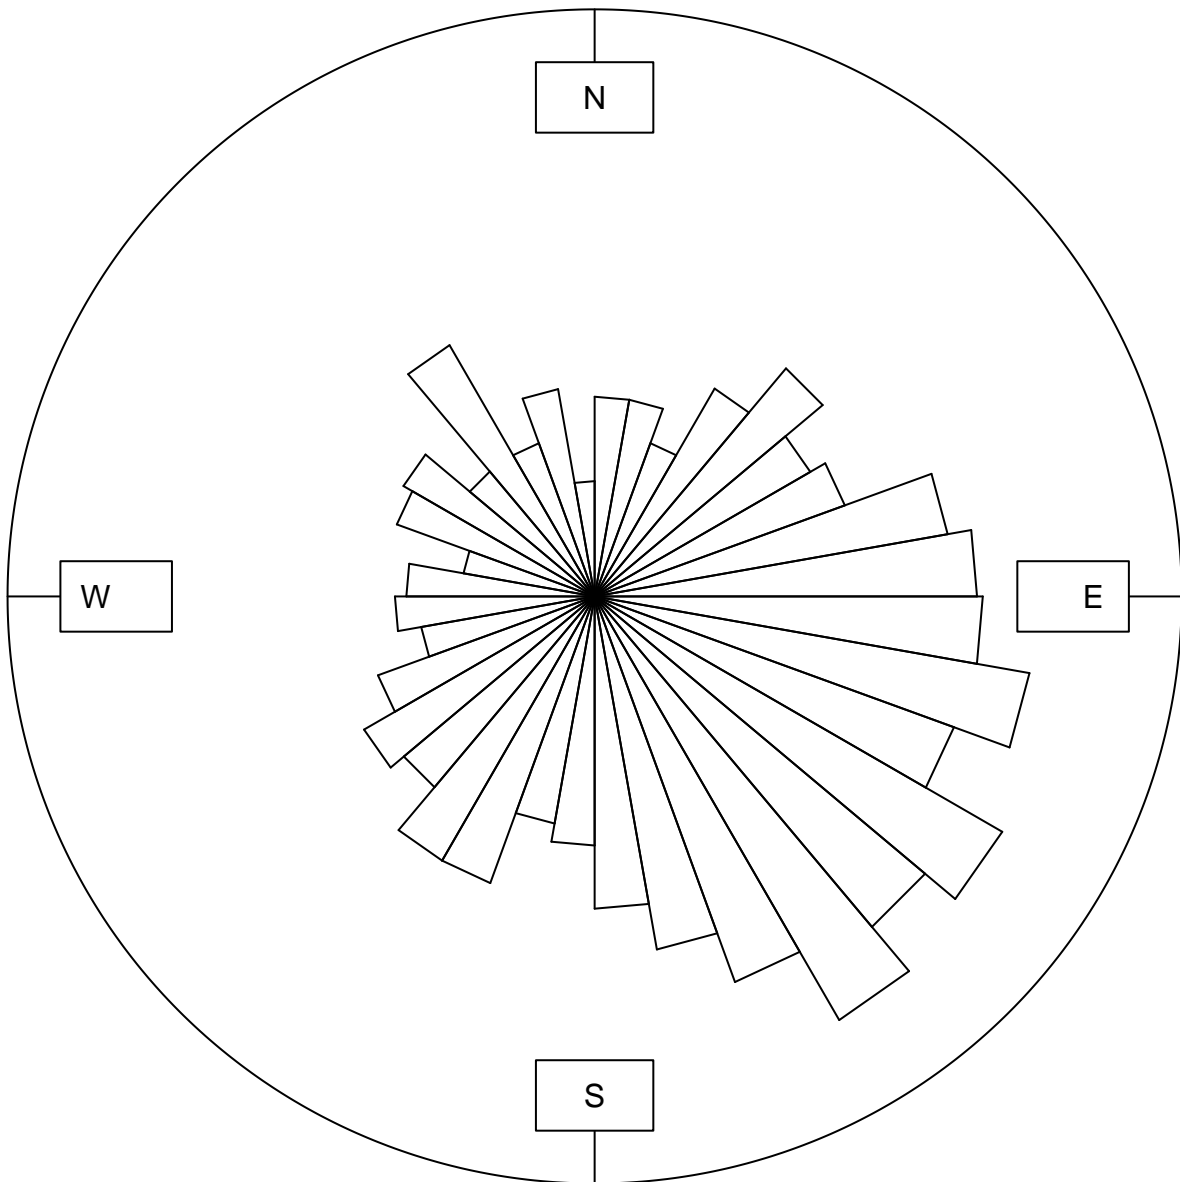

# bootstrap 285

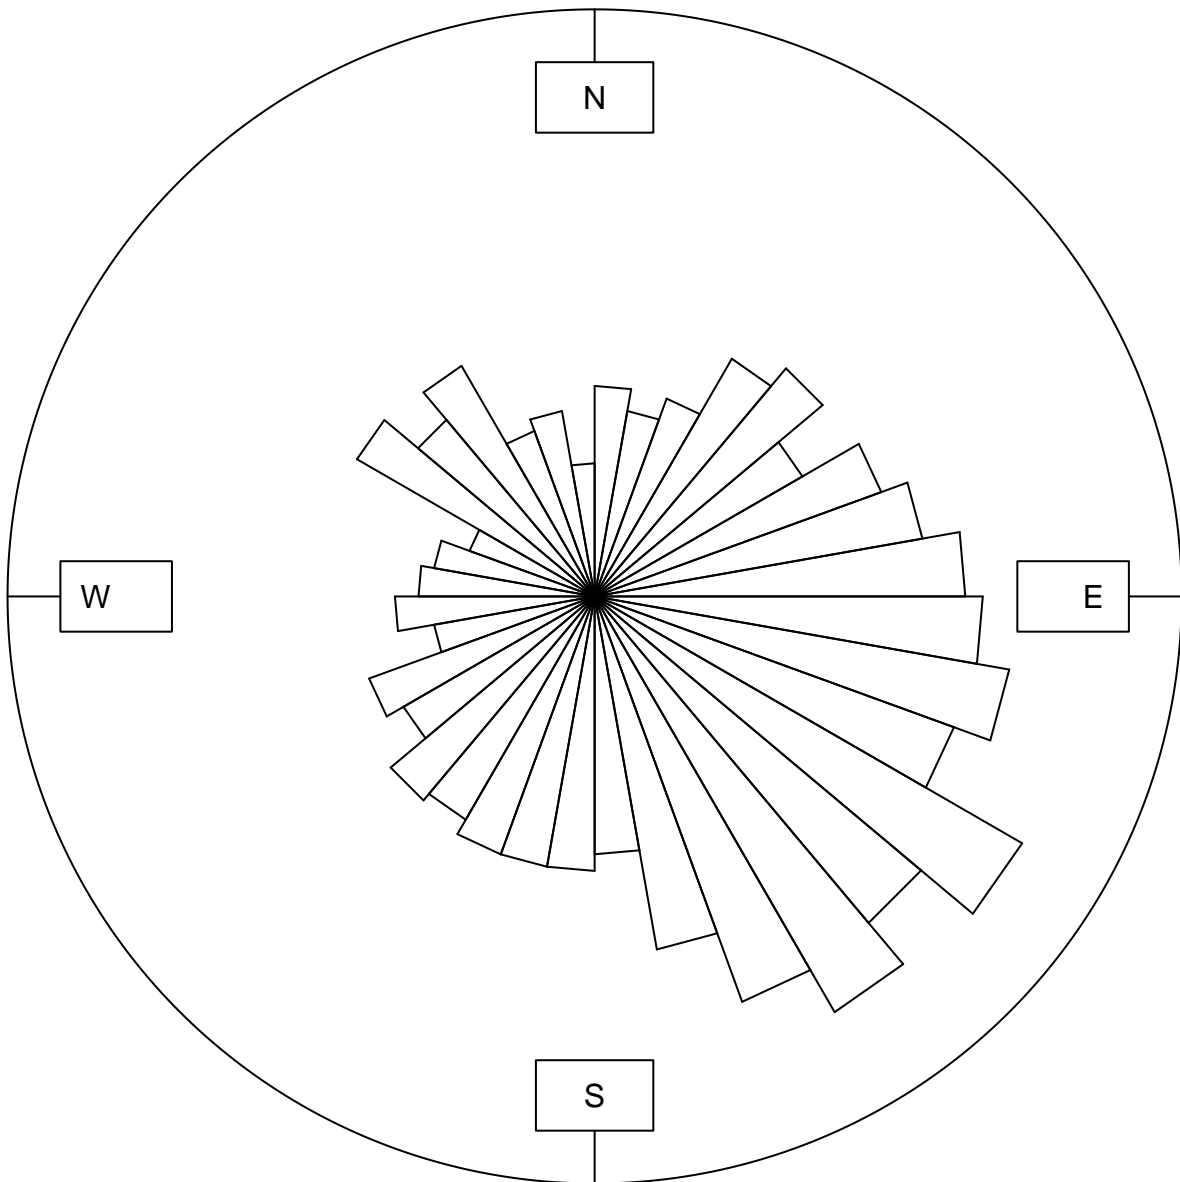

# bootstrap 286

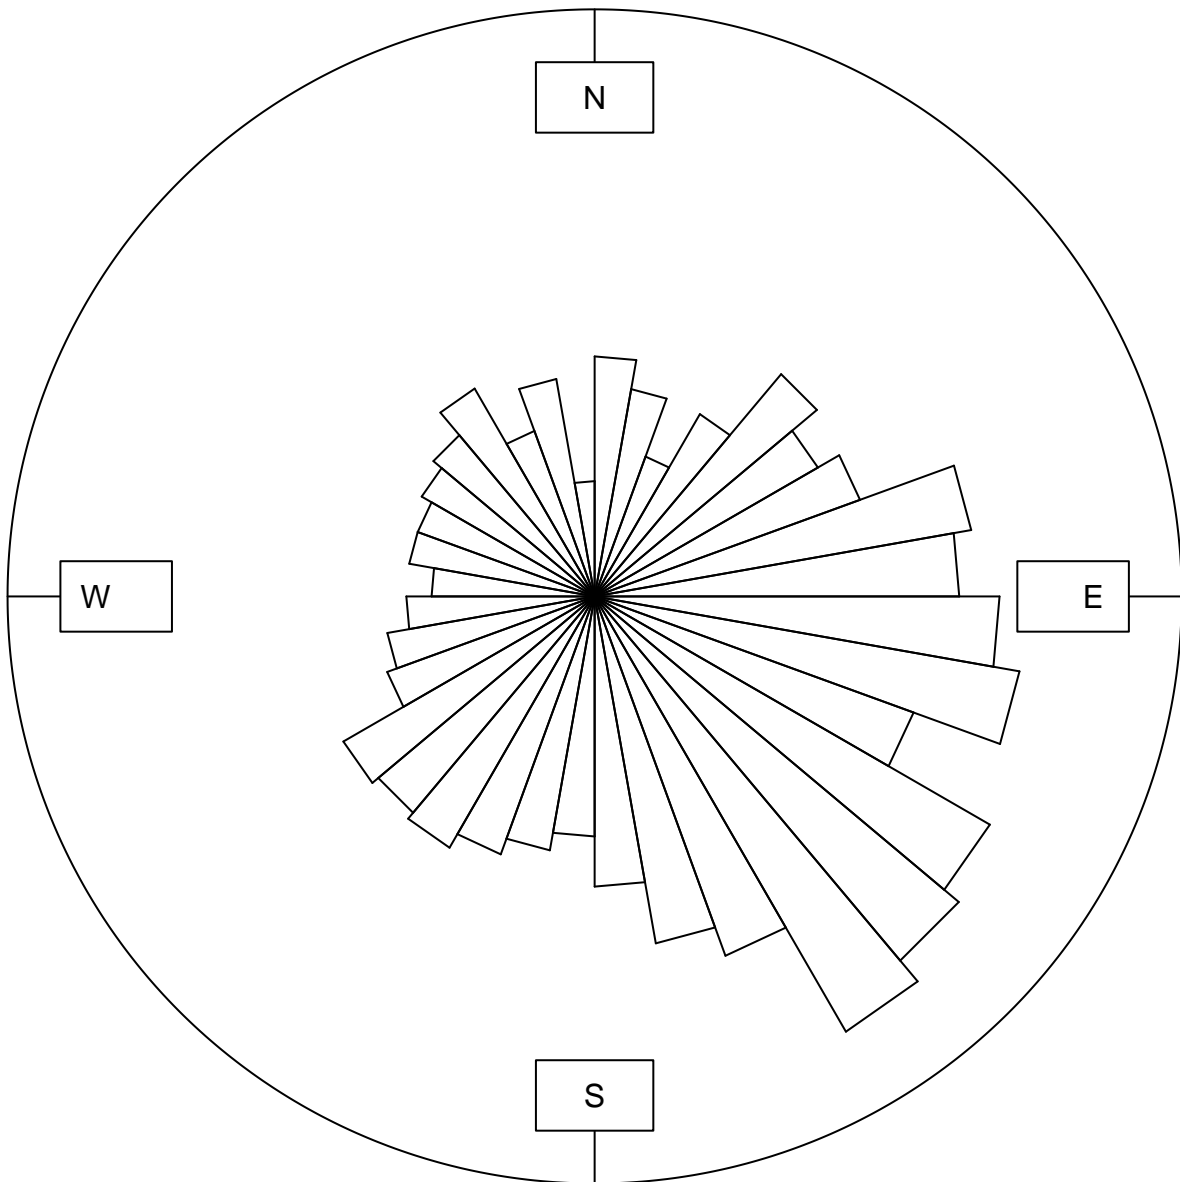

# bootstrap 287

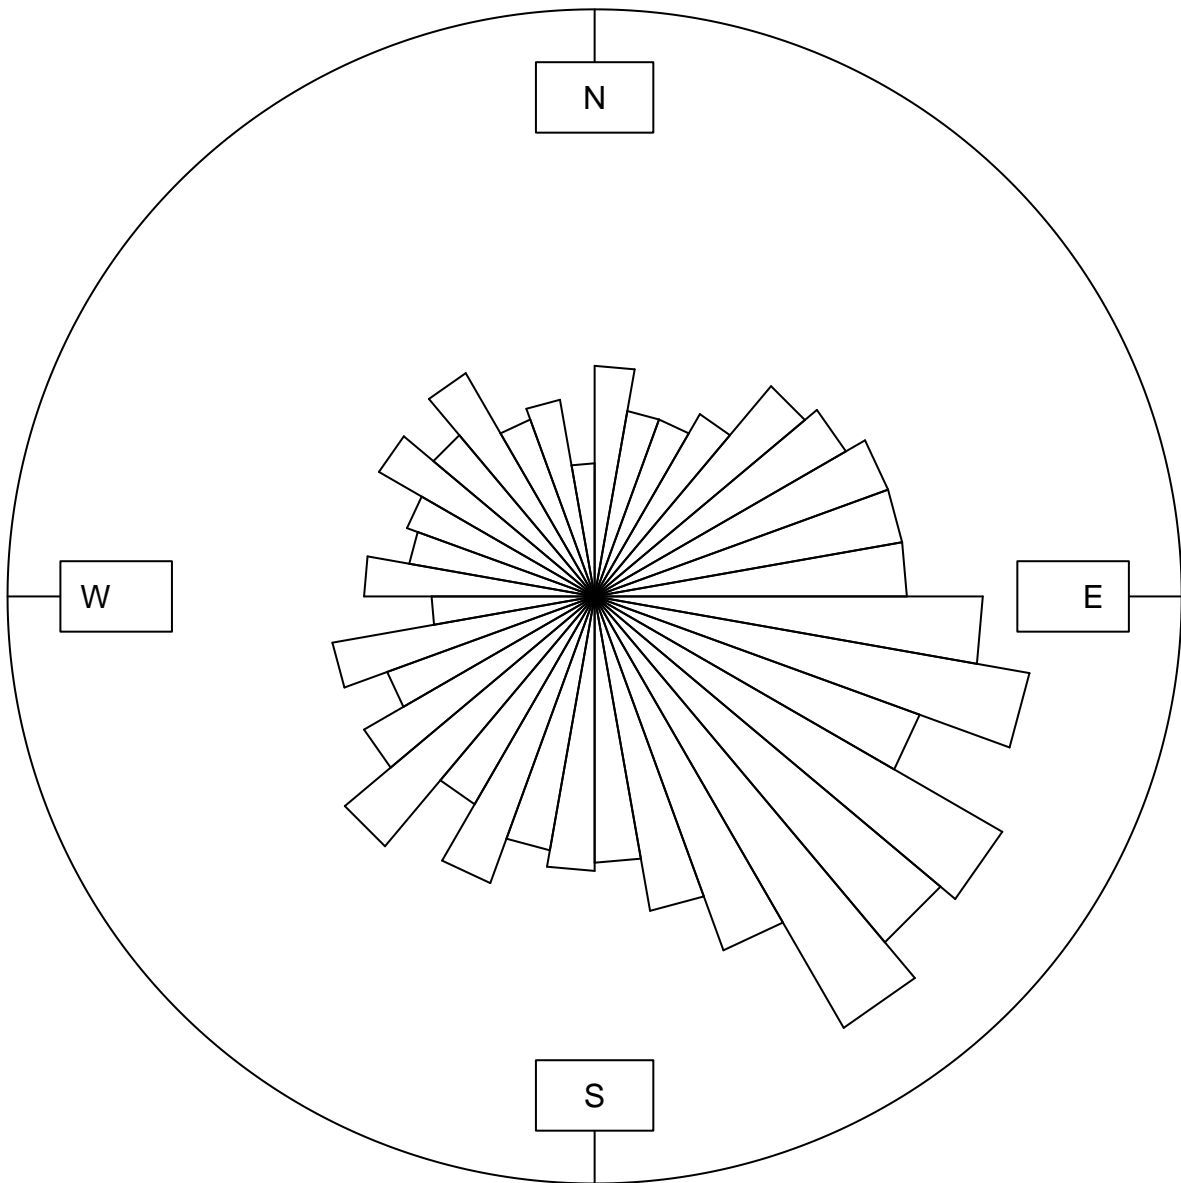

bootstrap 288

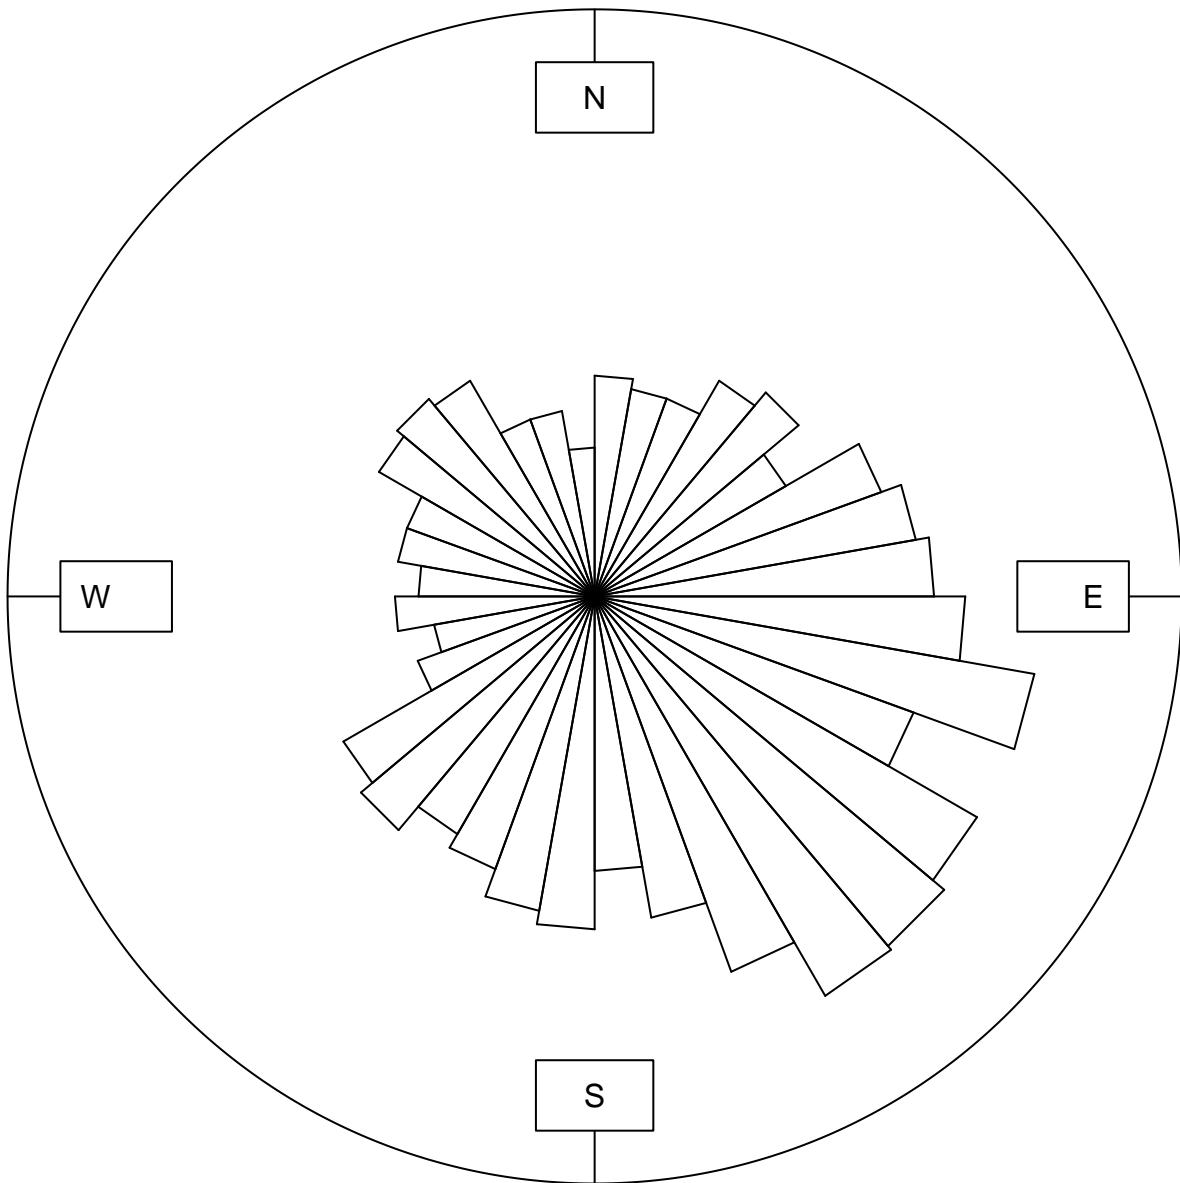



# bootstrap 289

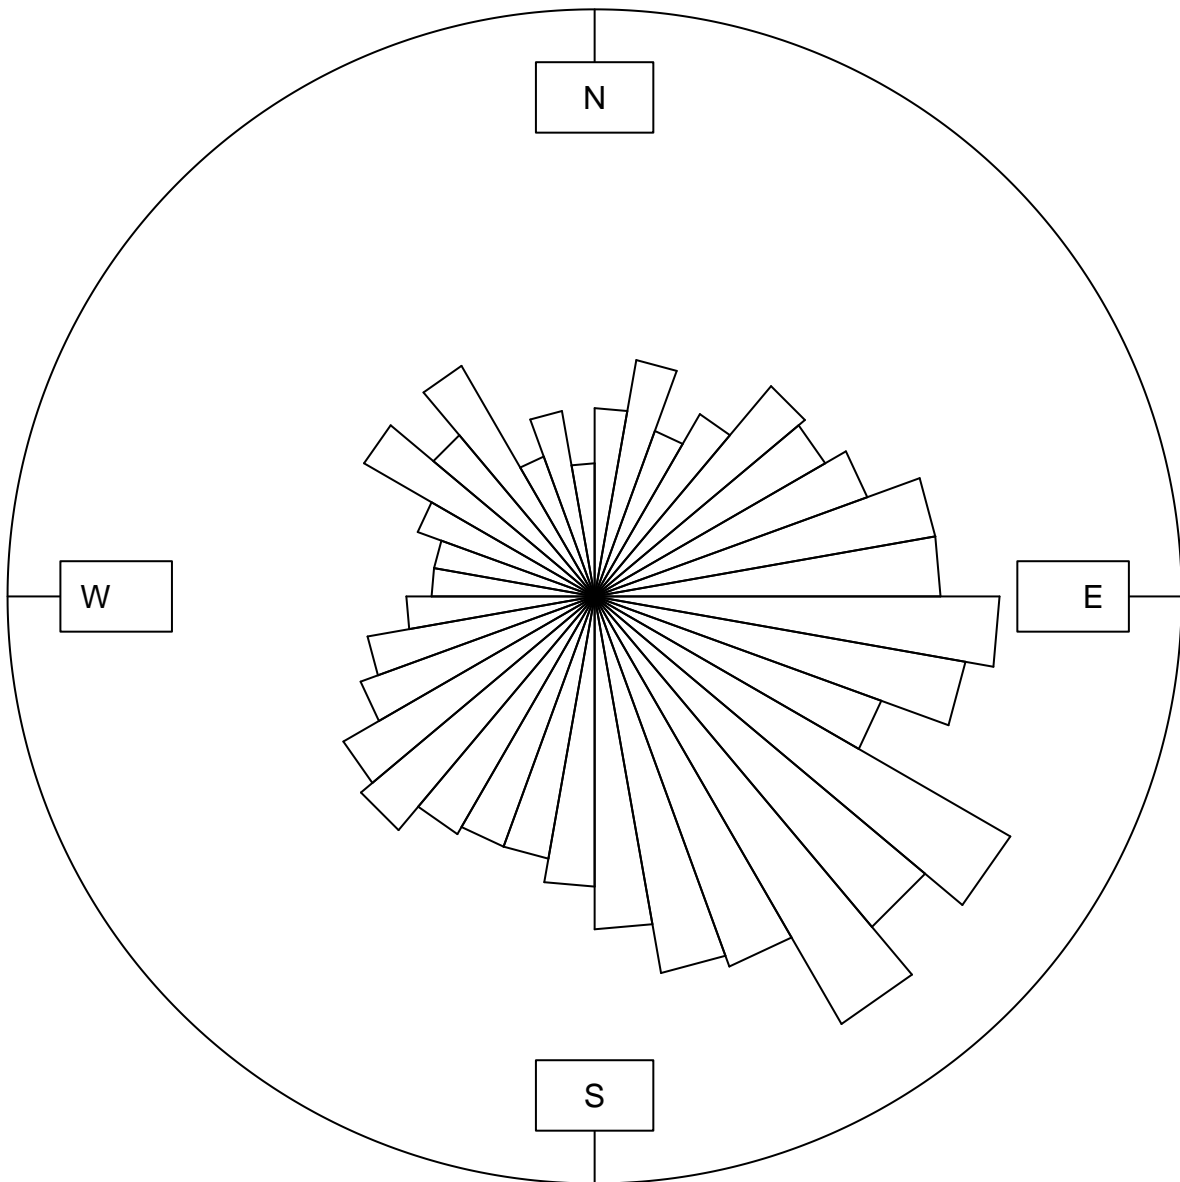

# bootstrap 290

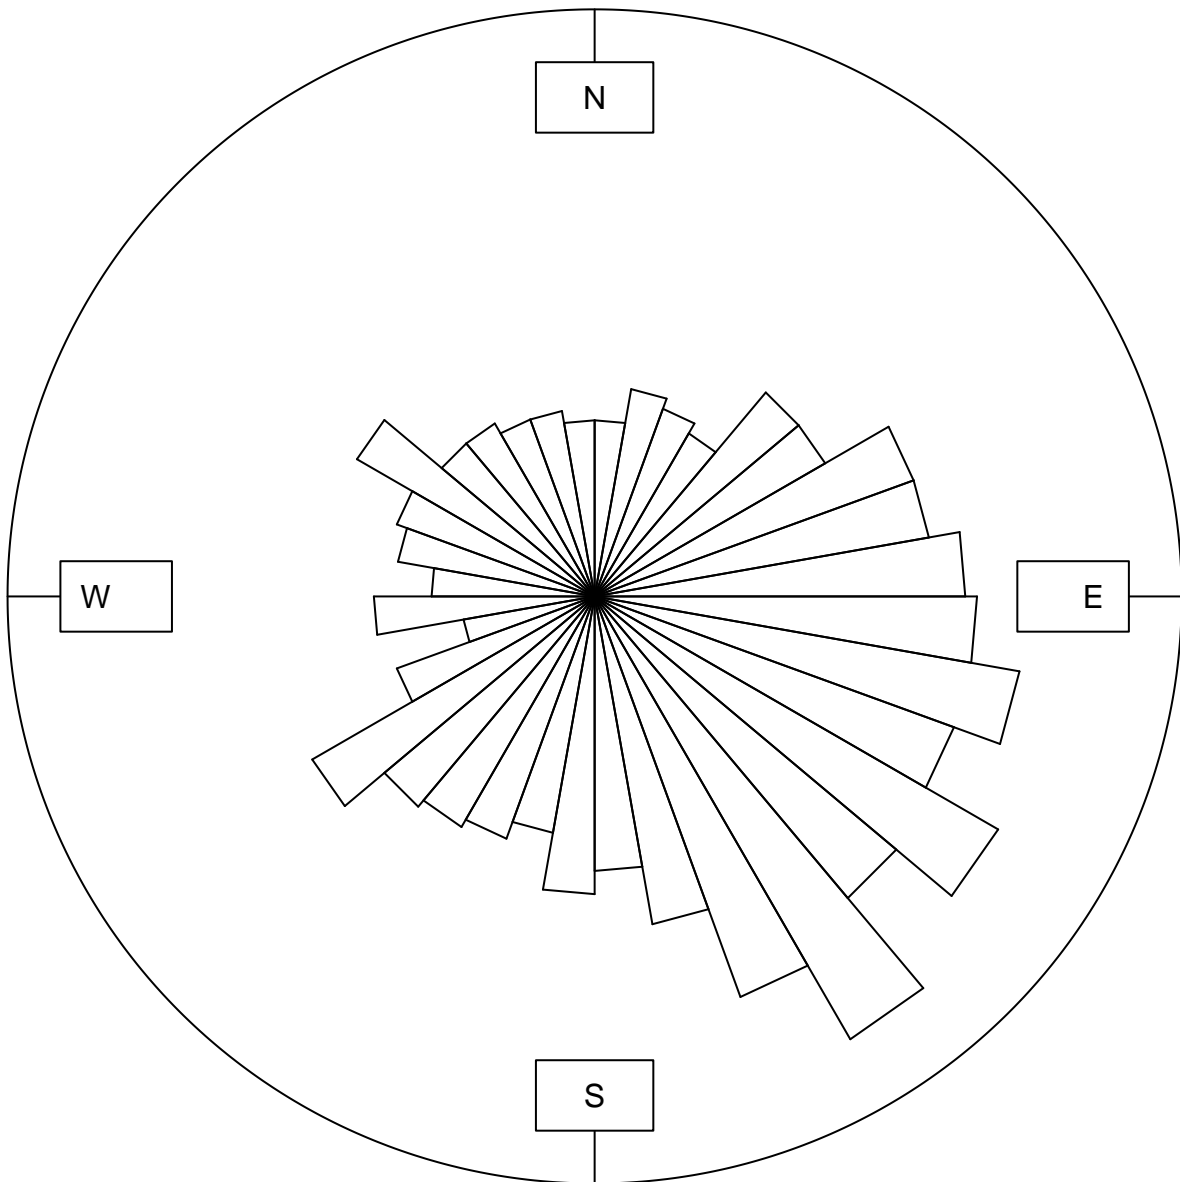

# bootstrap 291

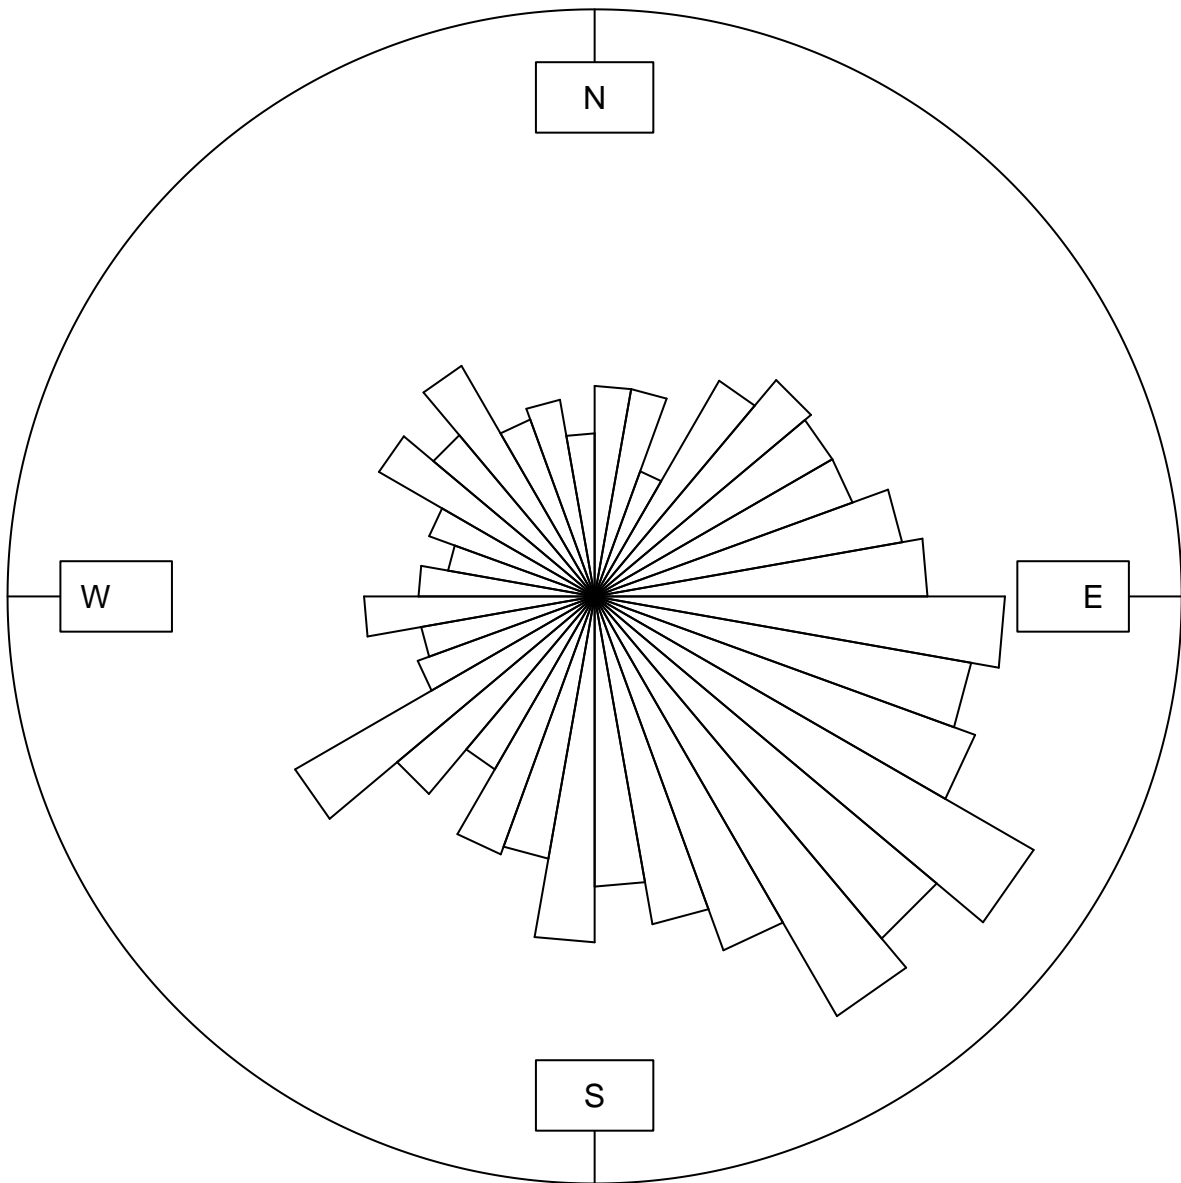

# bootstrap 292

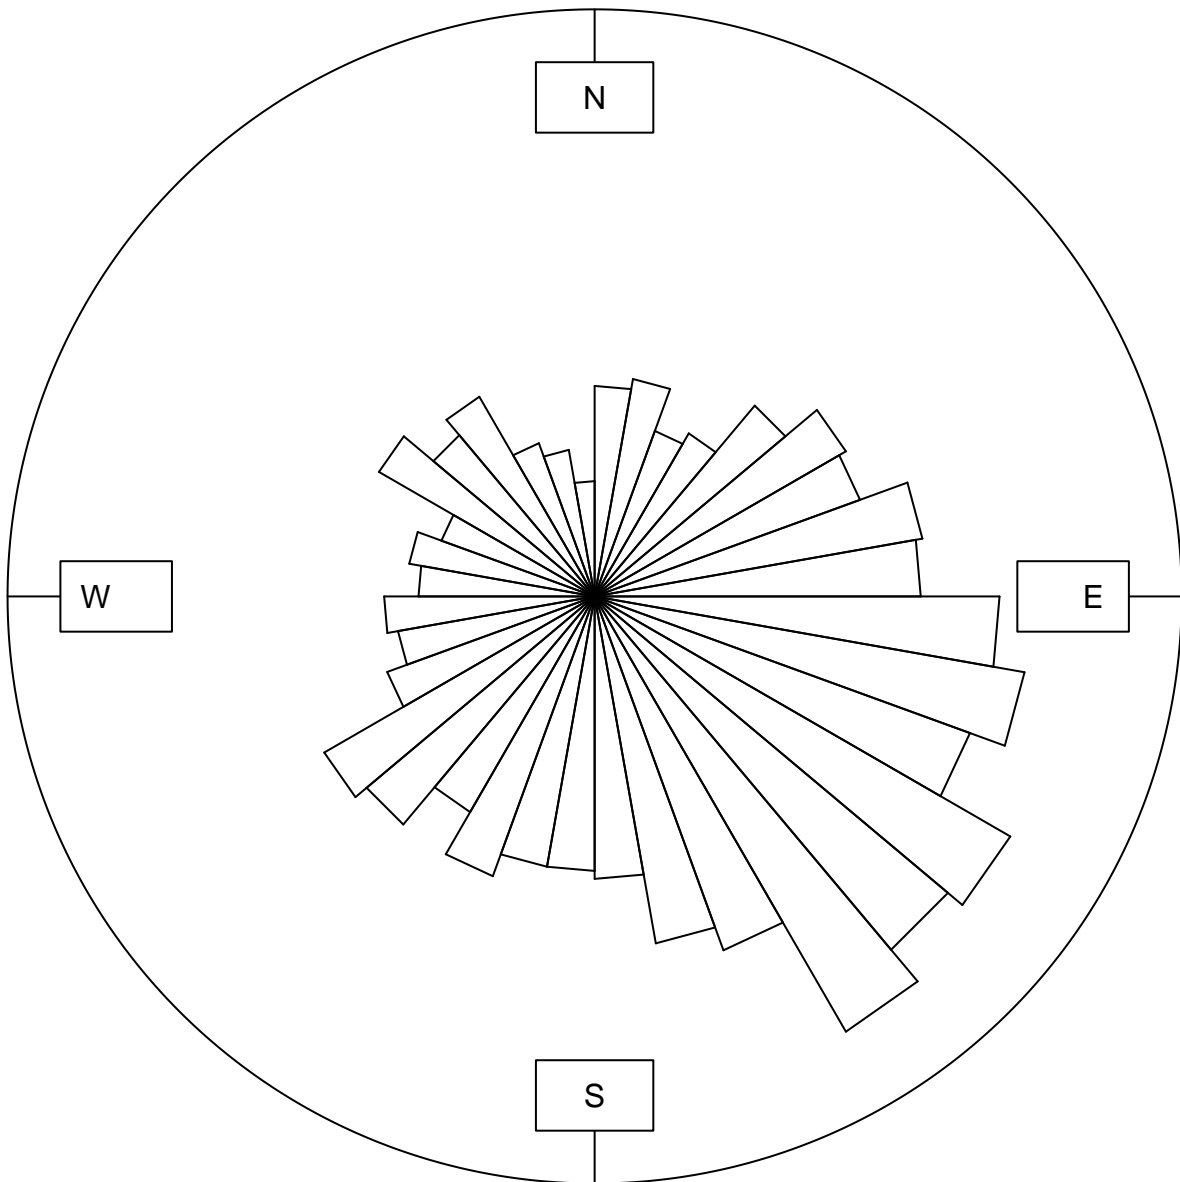

# bootstrap 293

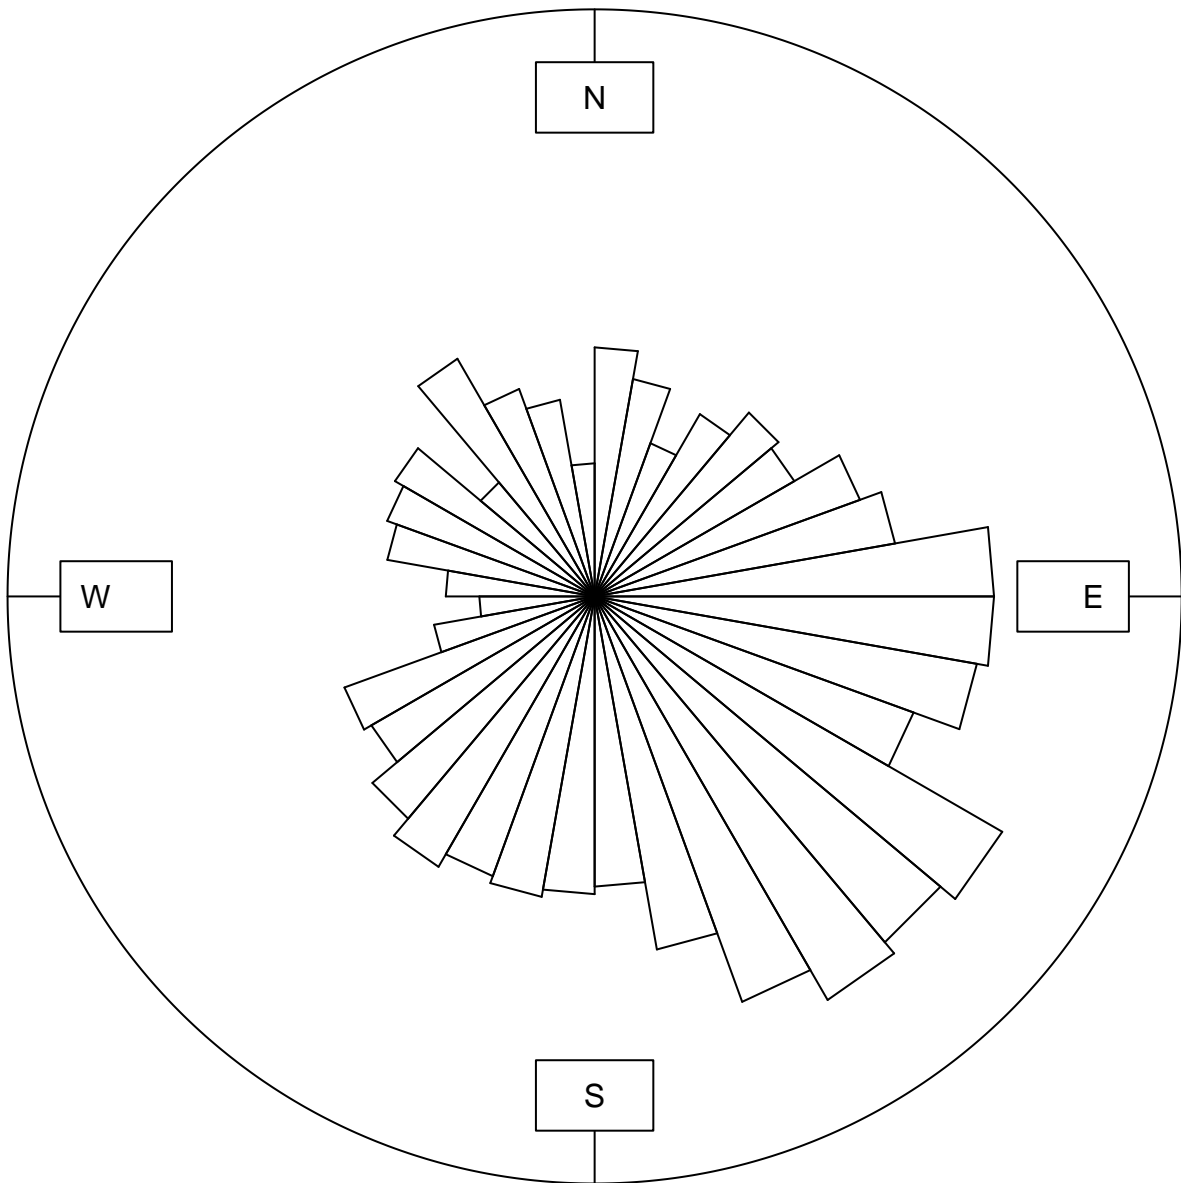

# bootstrap 294

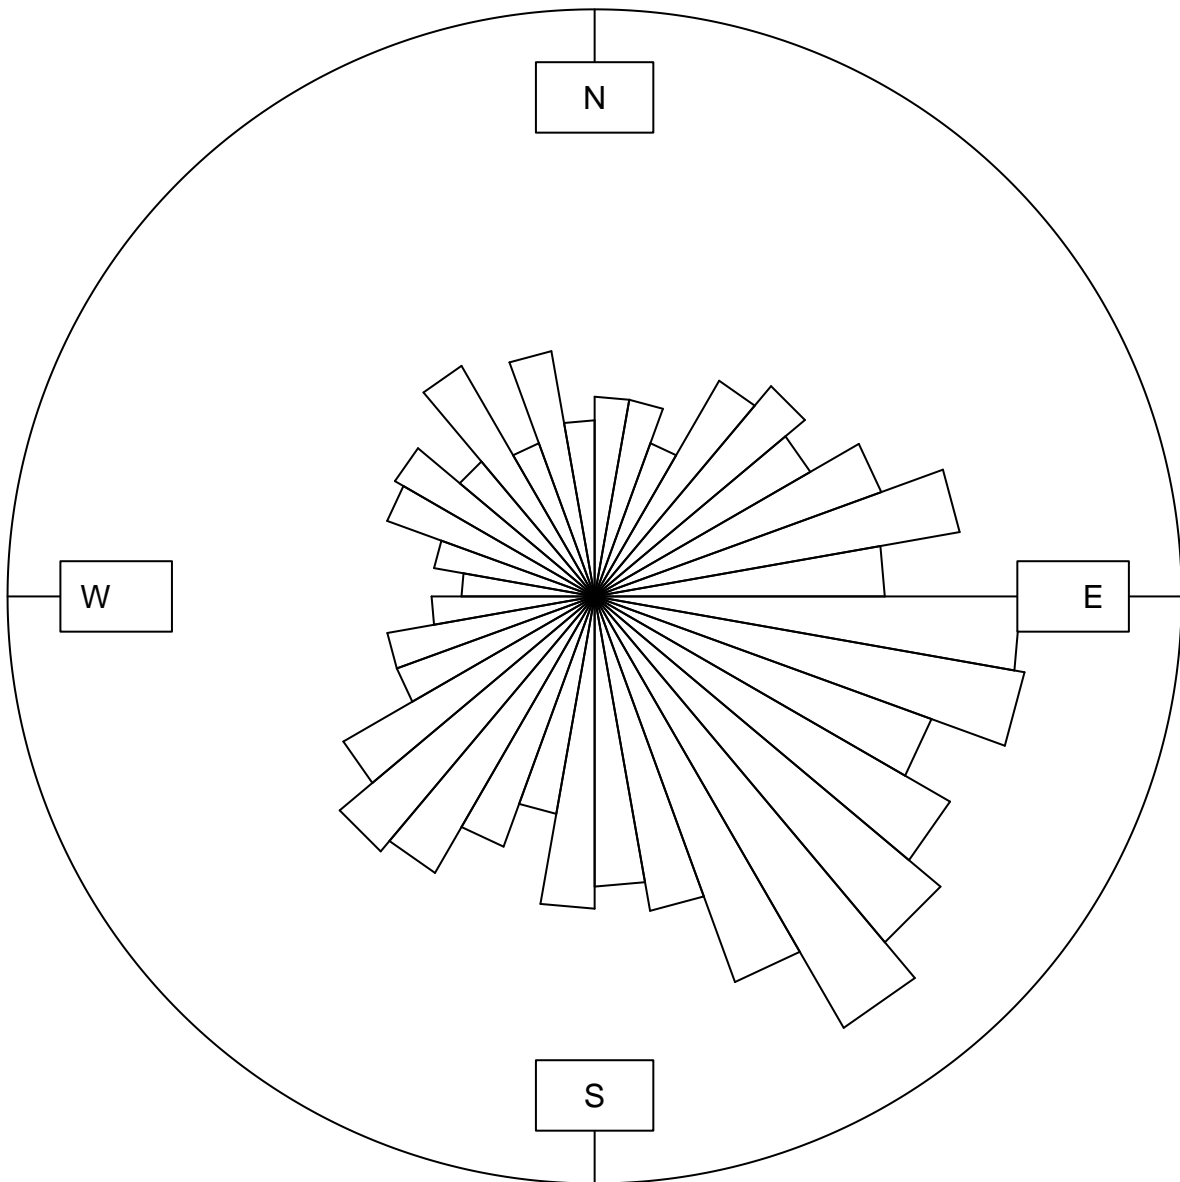

# bootstrap 295

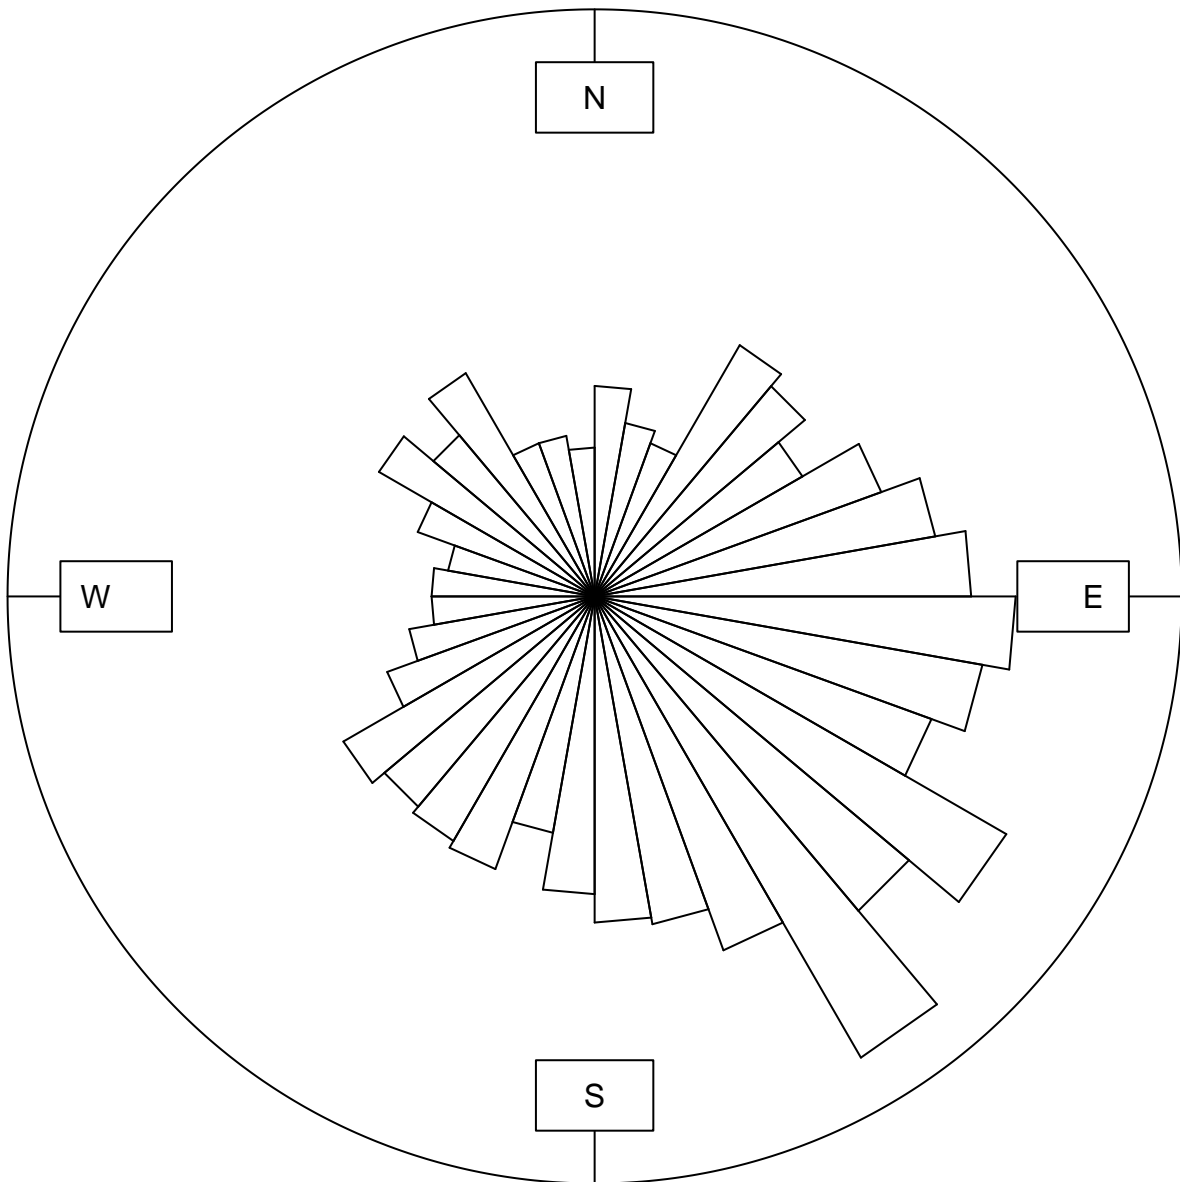

**bootstrap 296**

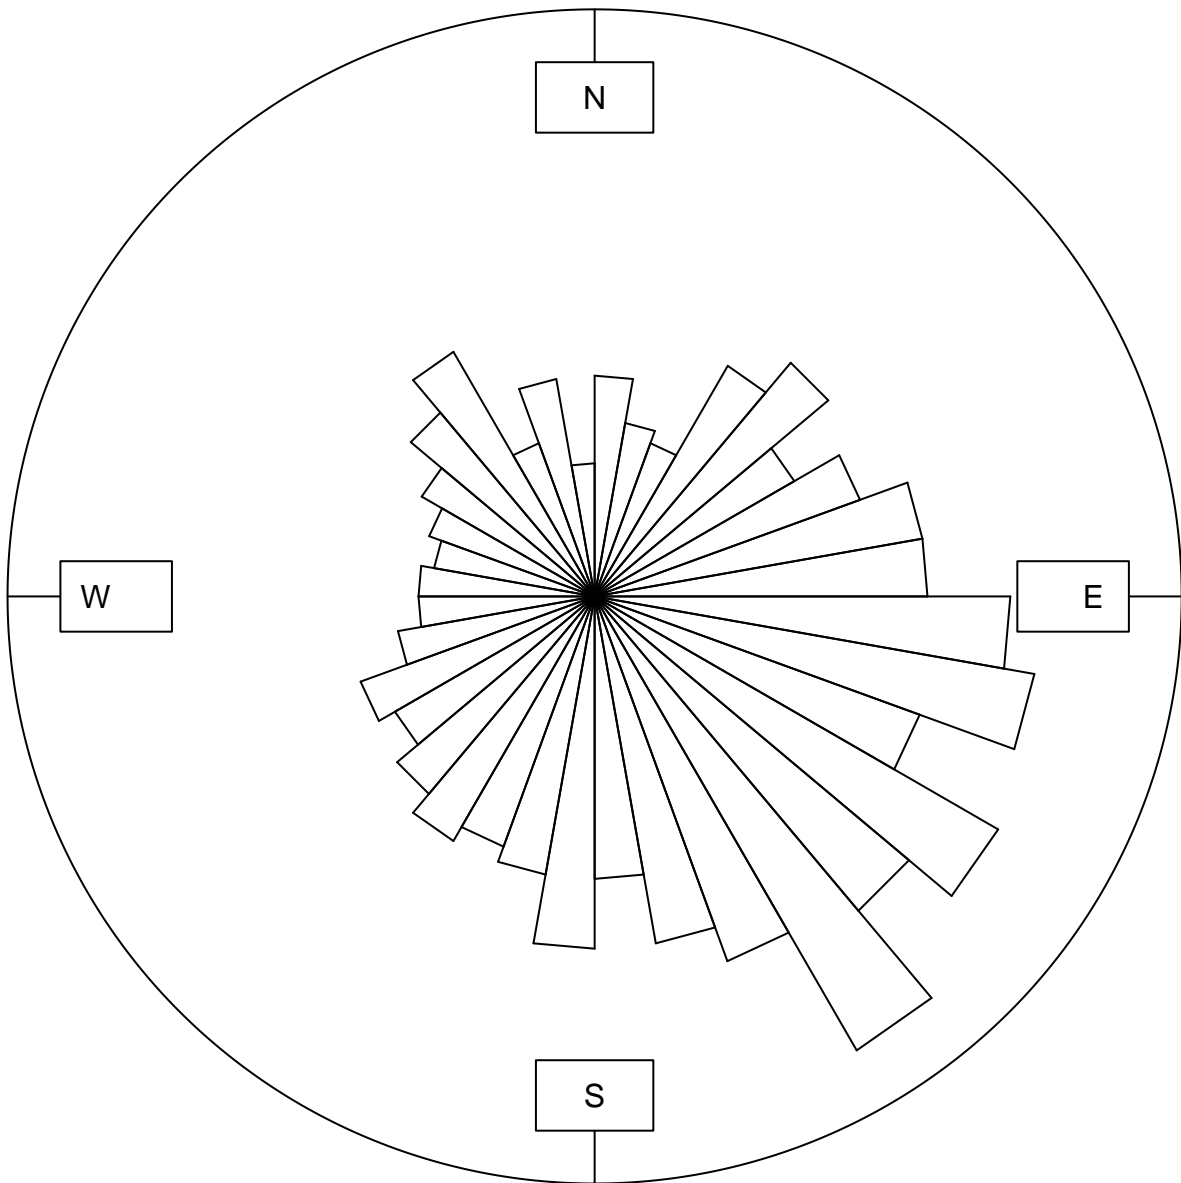



# bootstrap 297

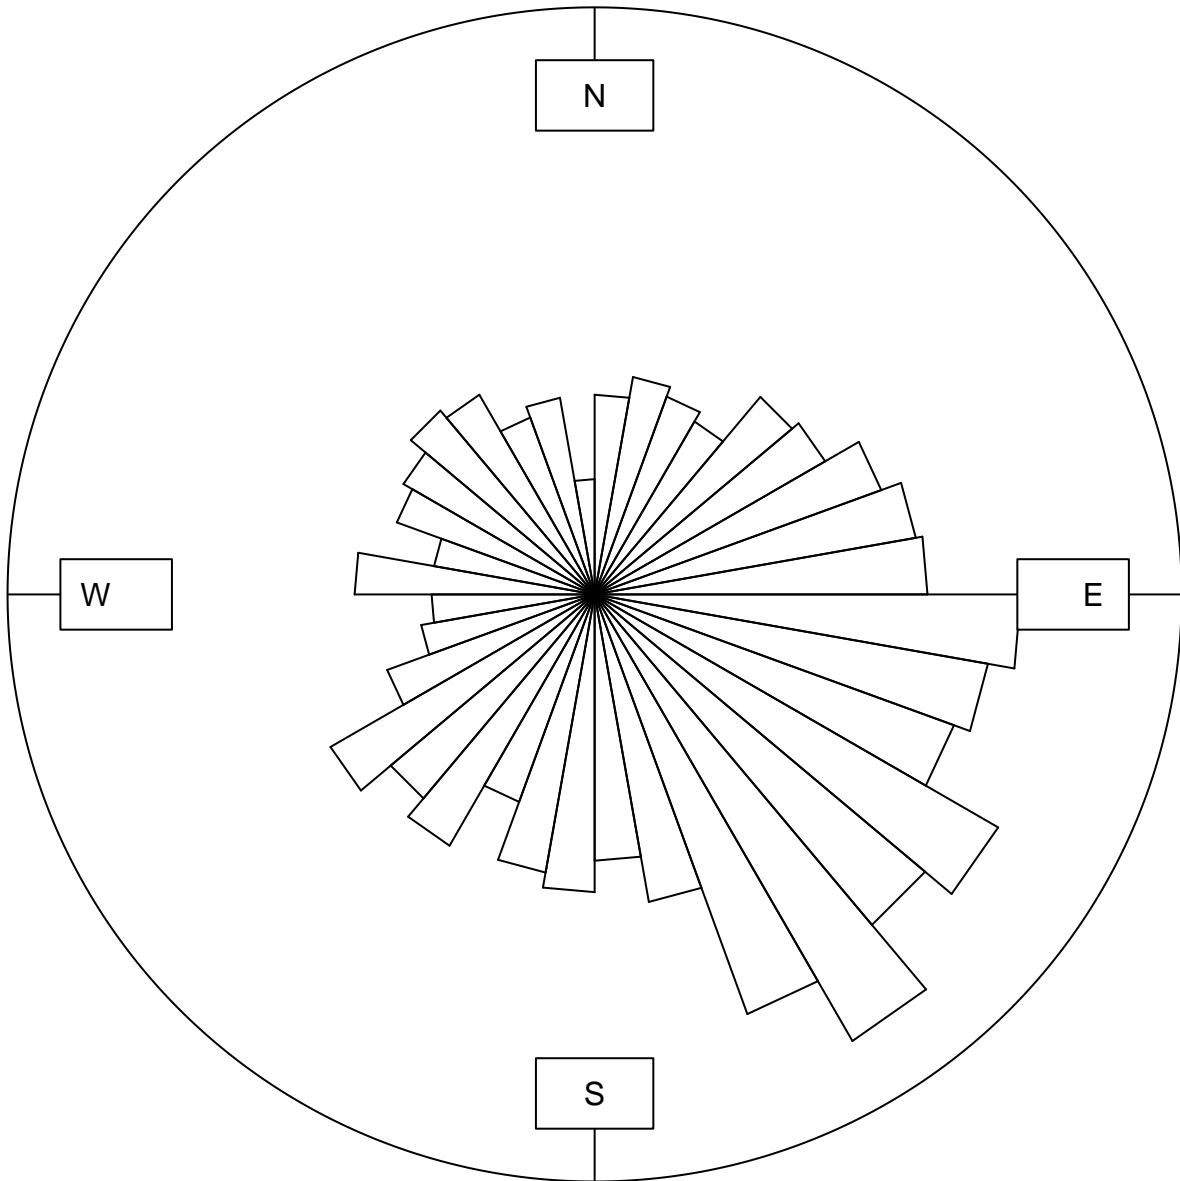

# bootstrap 298

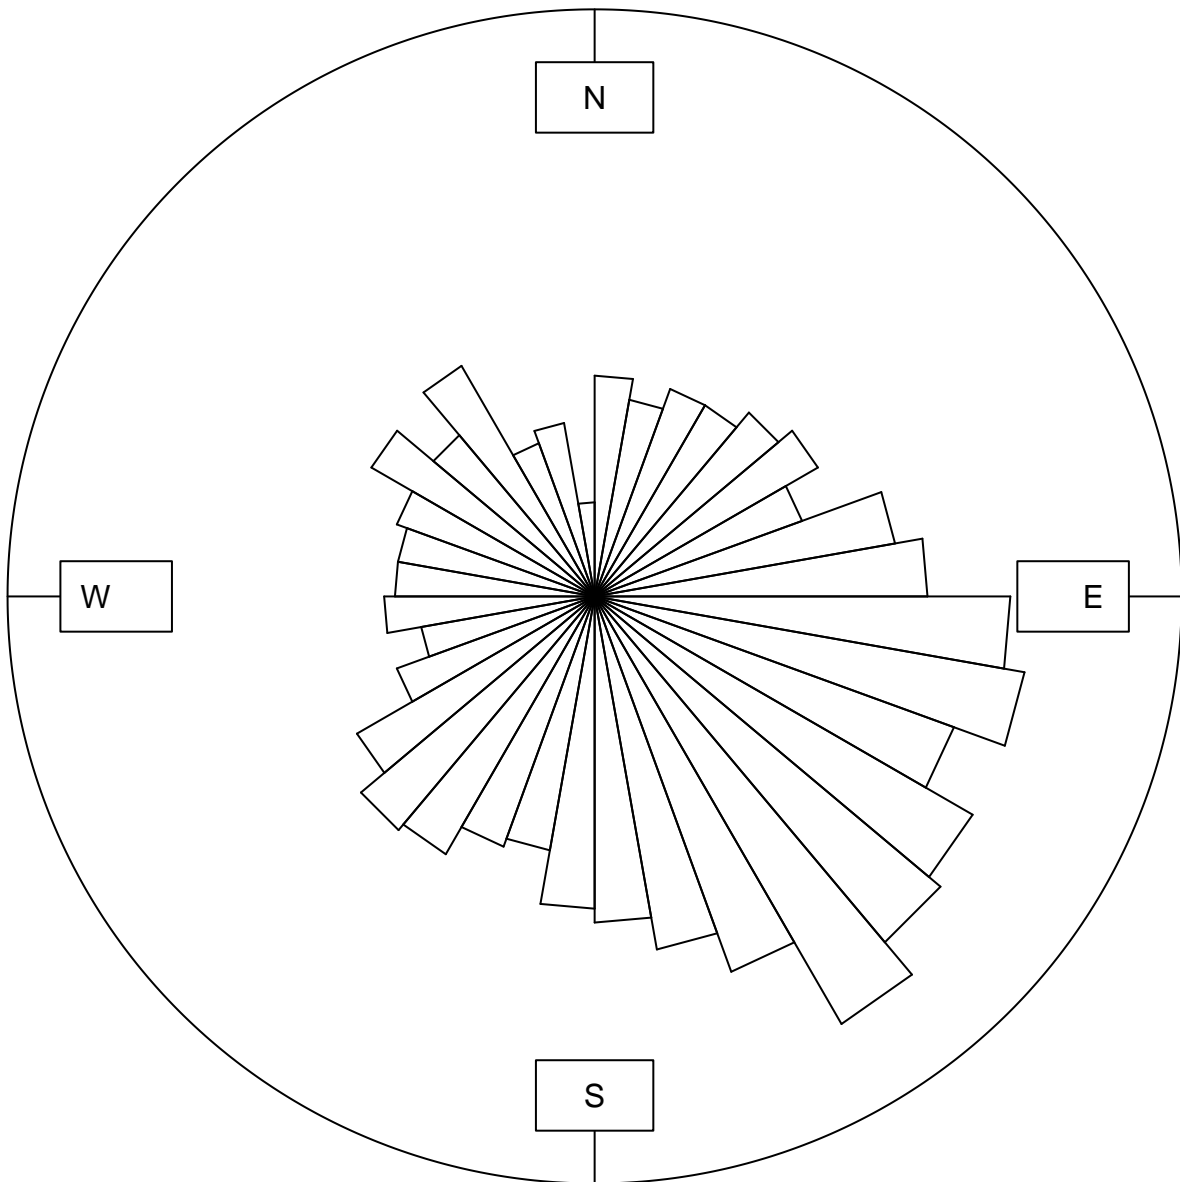

# bootstrap 299

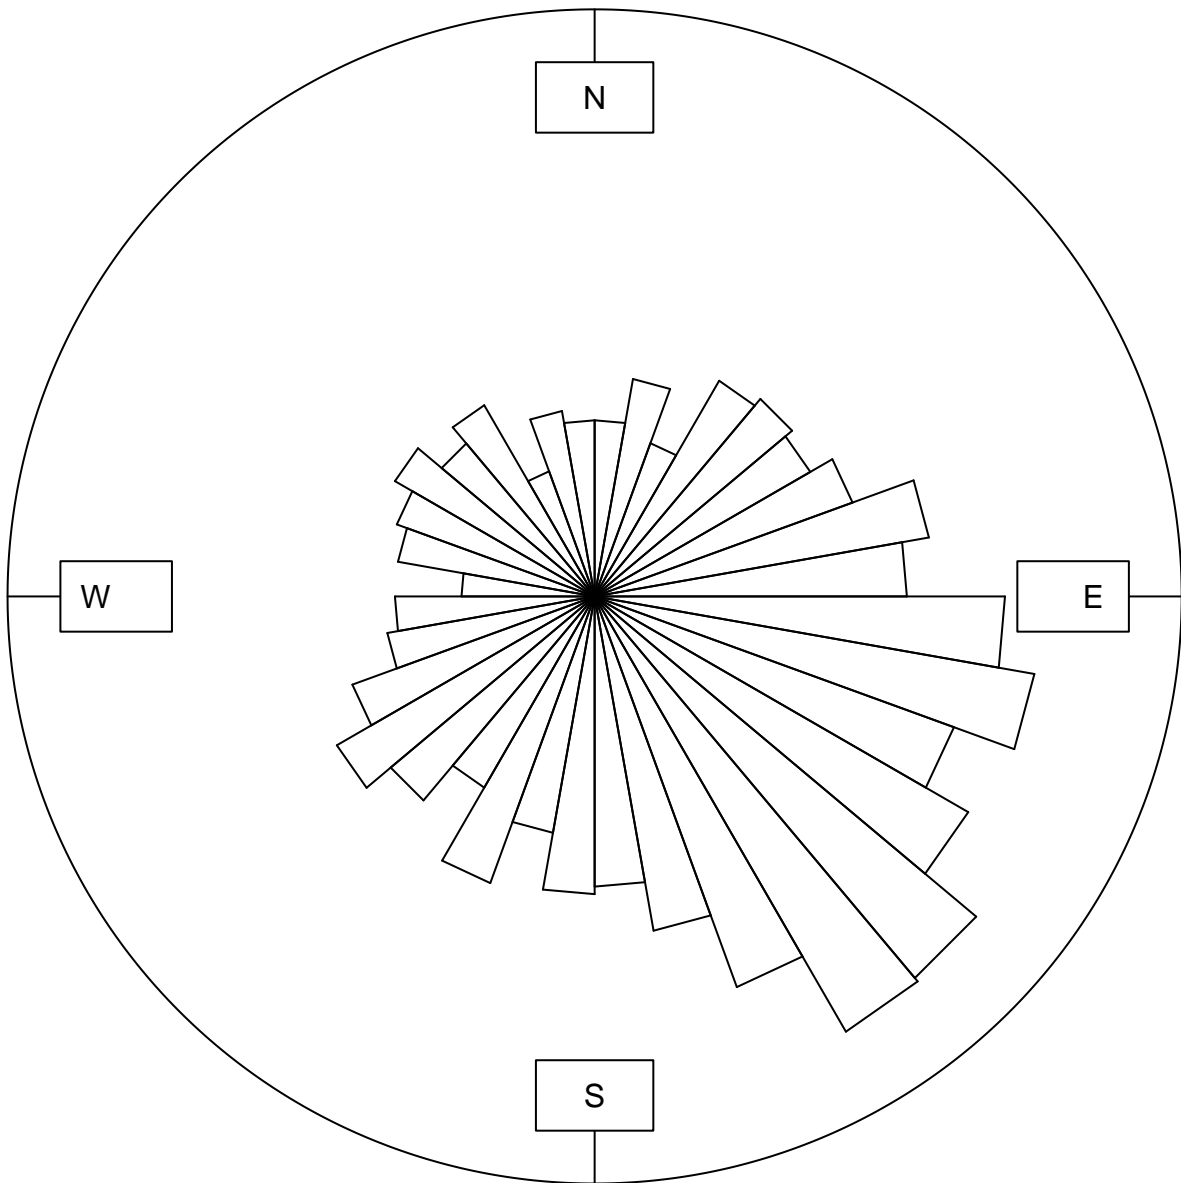

**bootstrap 300**

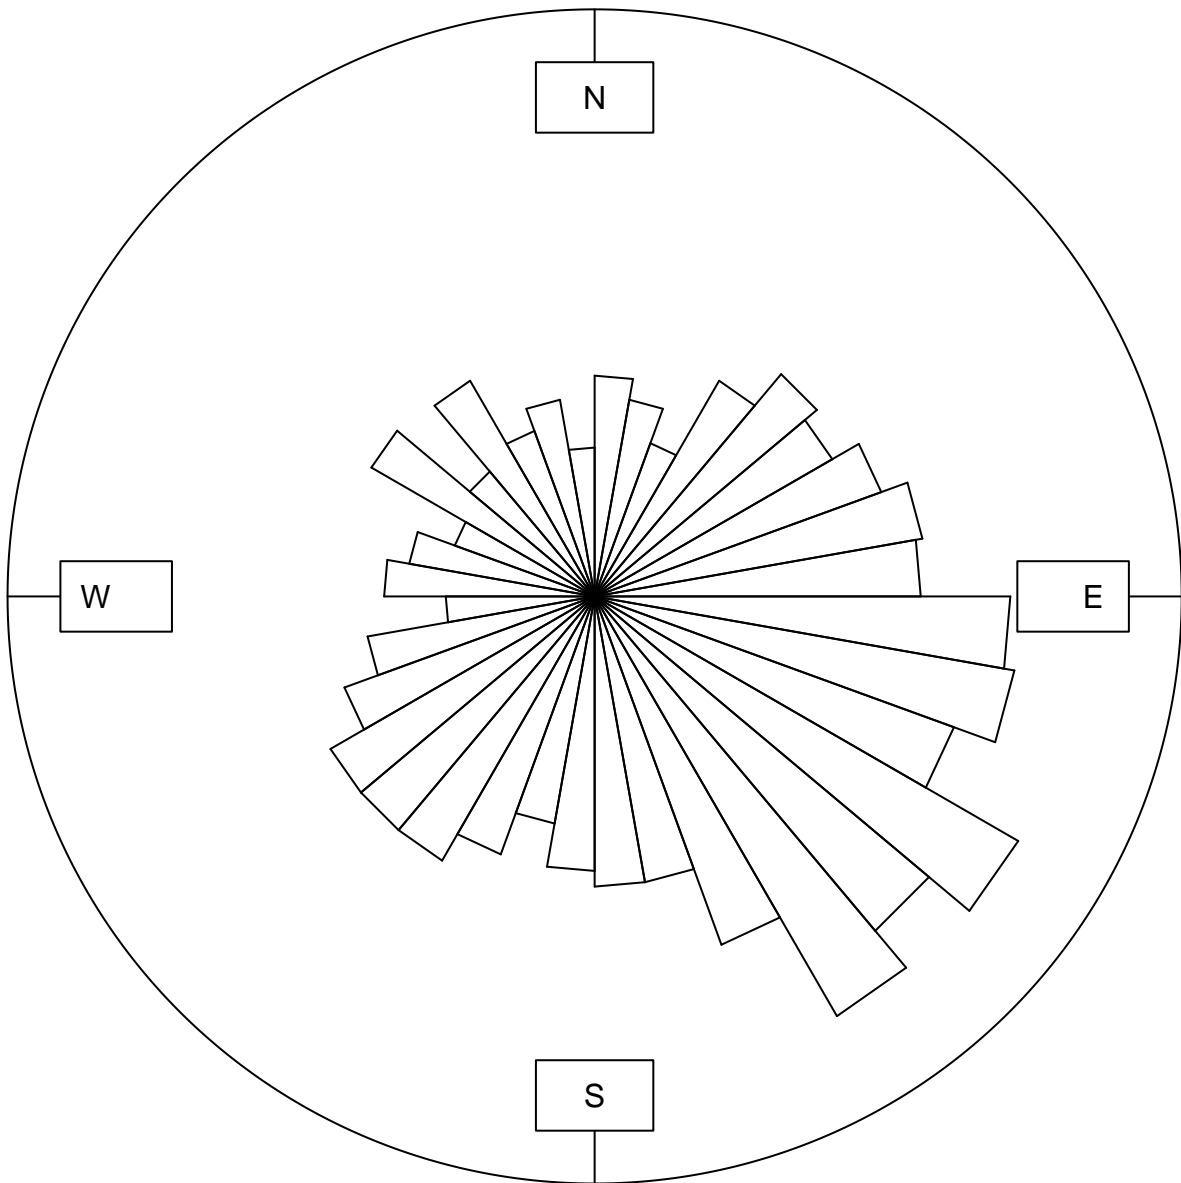

# bootstrap 301

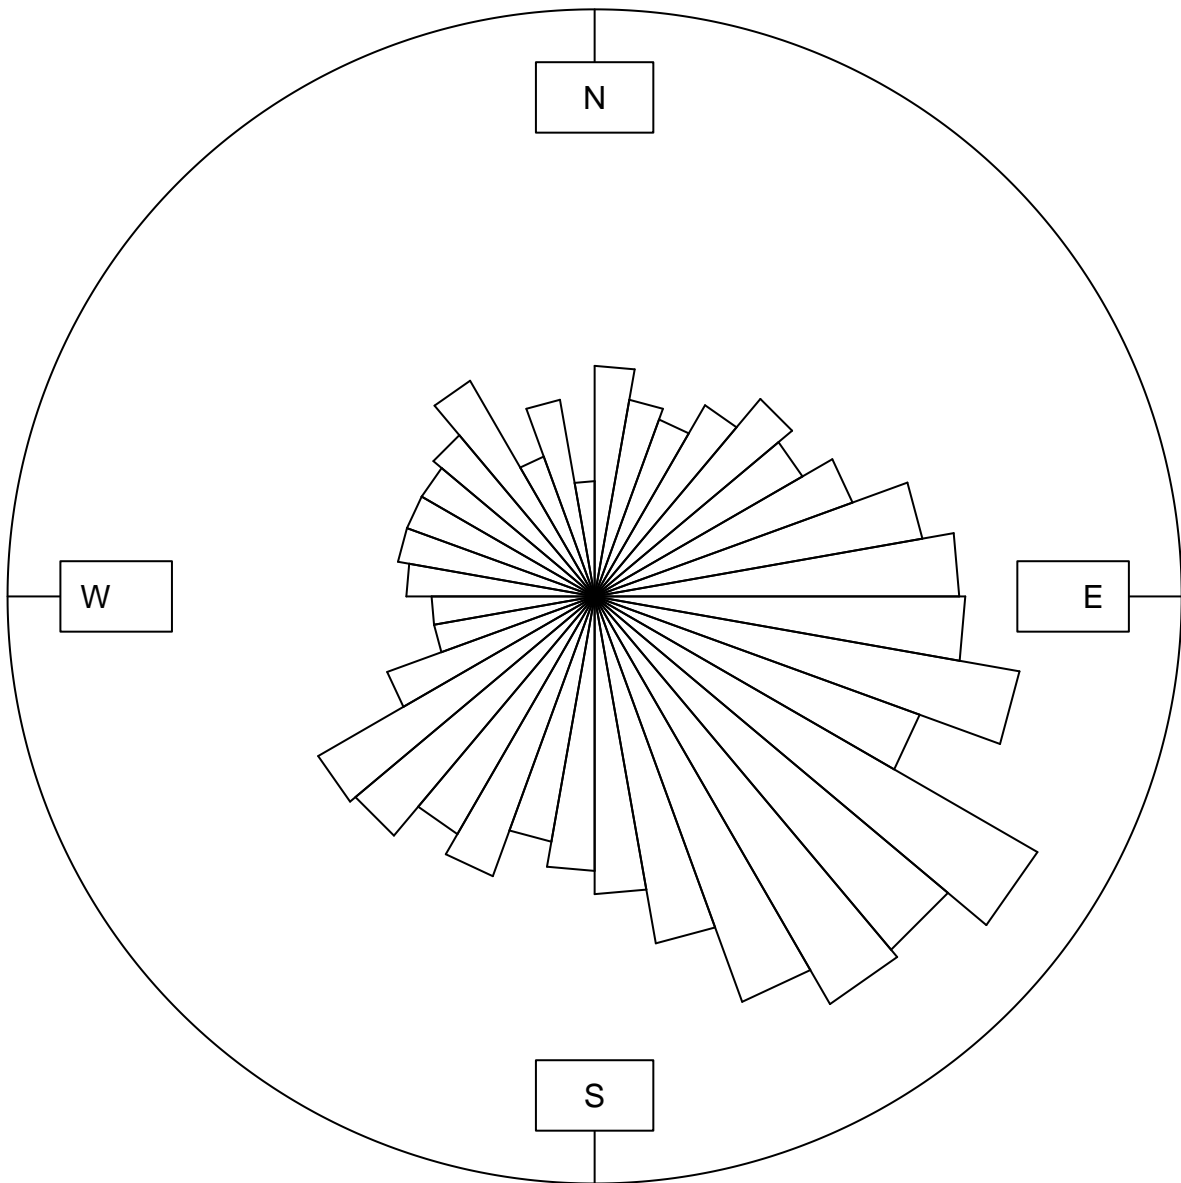

# bootstrap 302

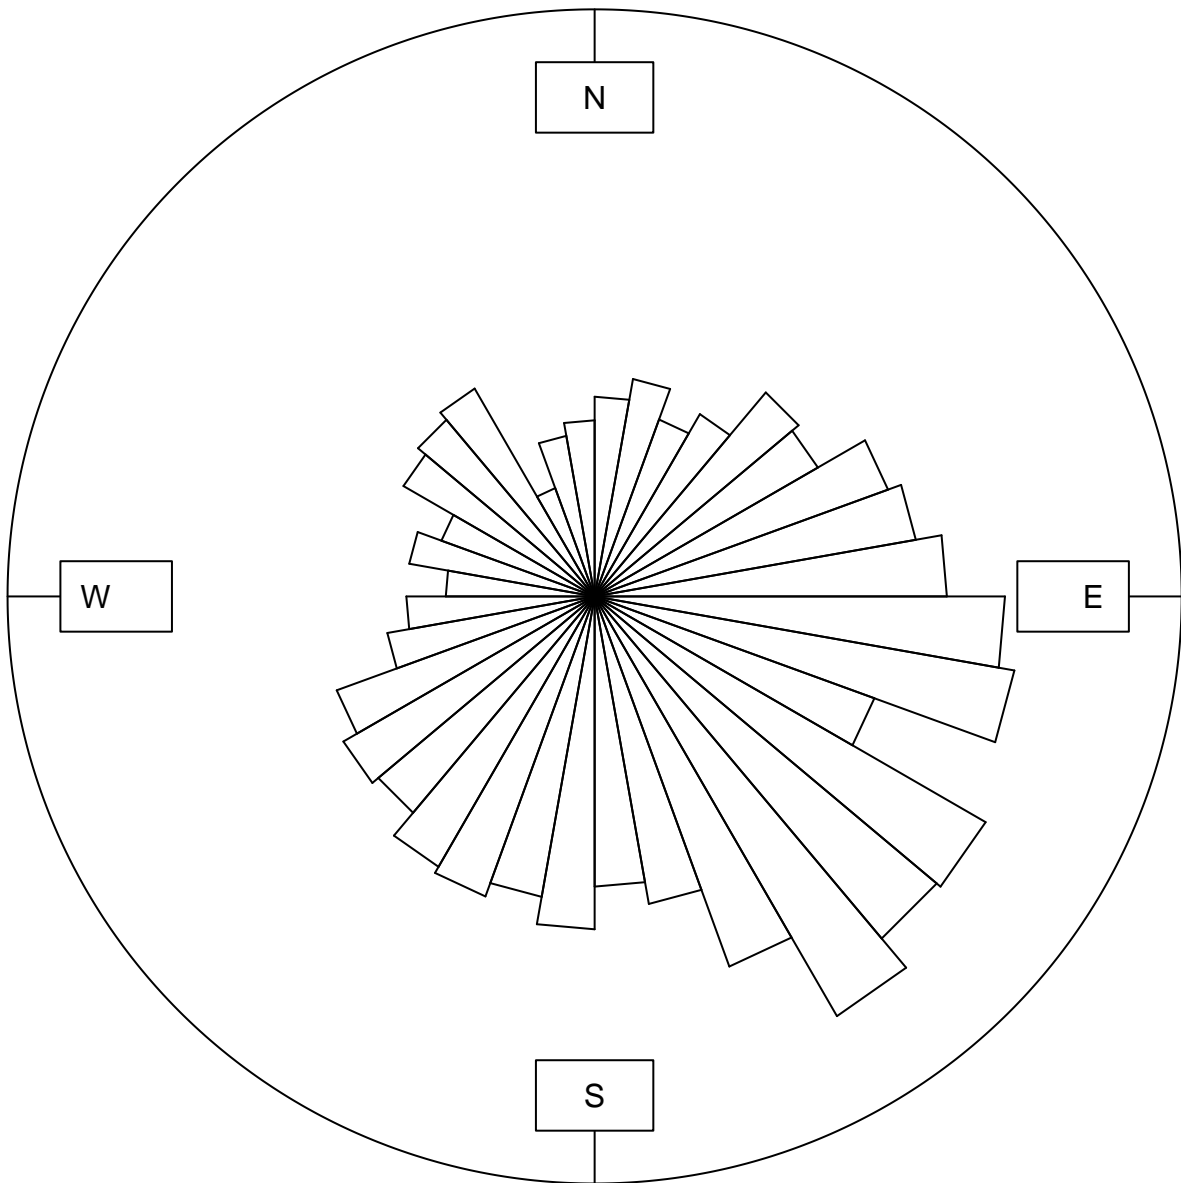

# bootstrap 303

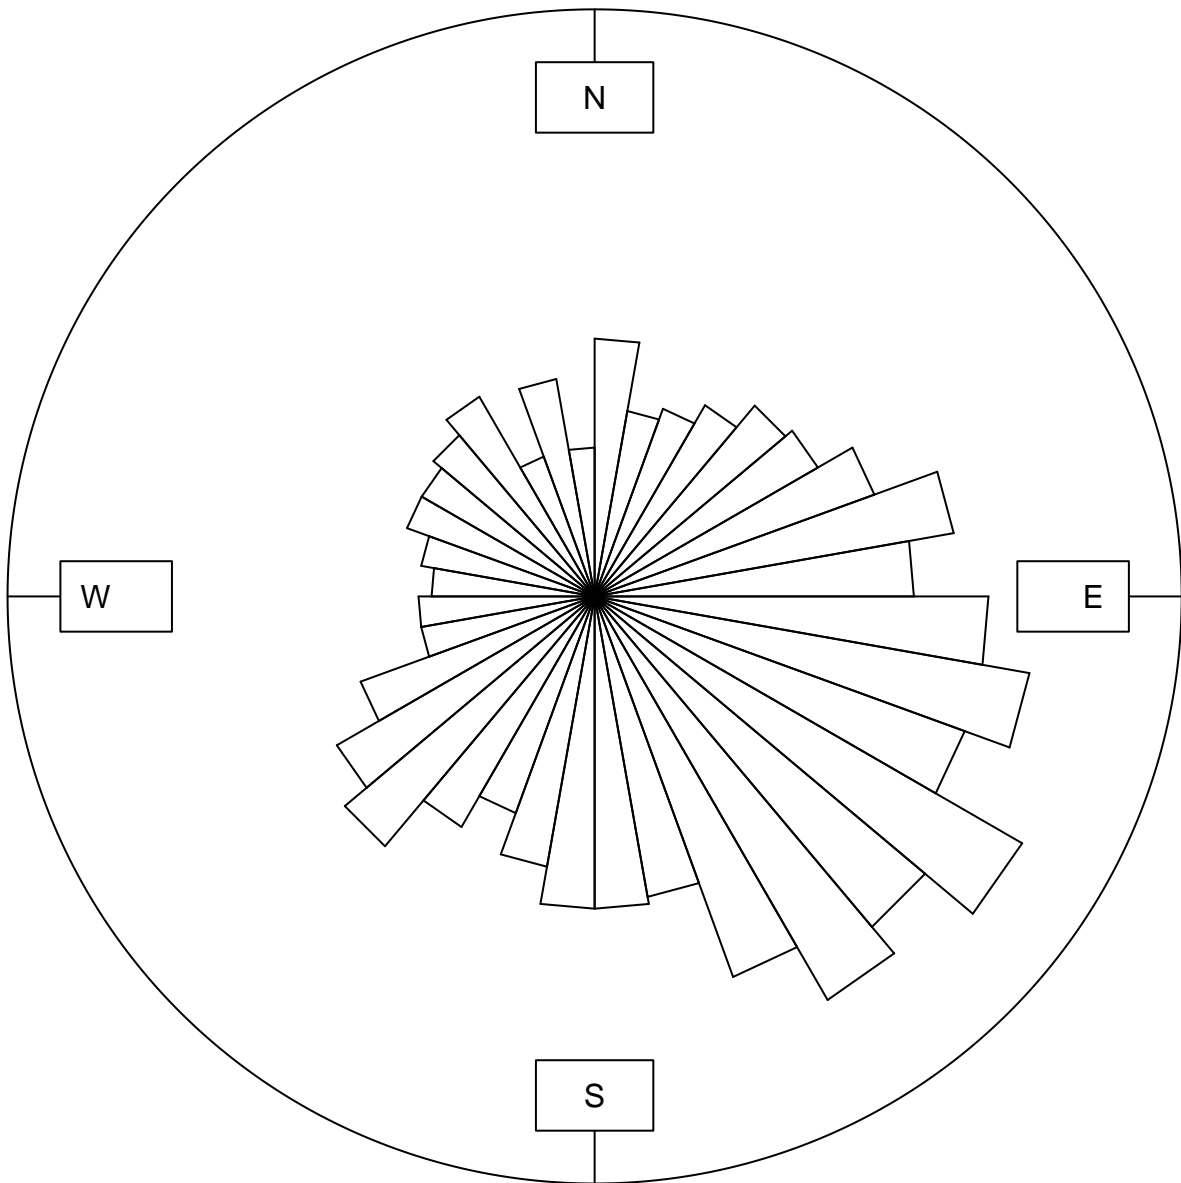

# bootstrap 304

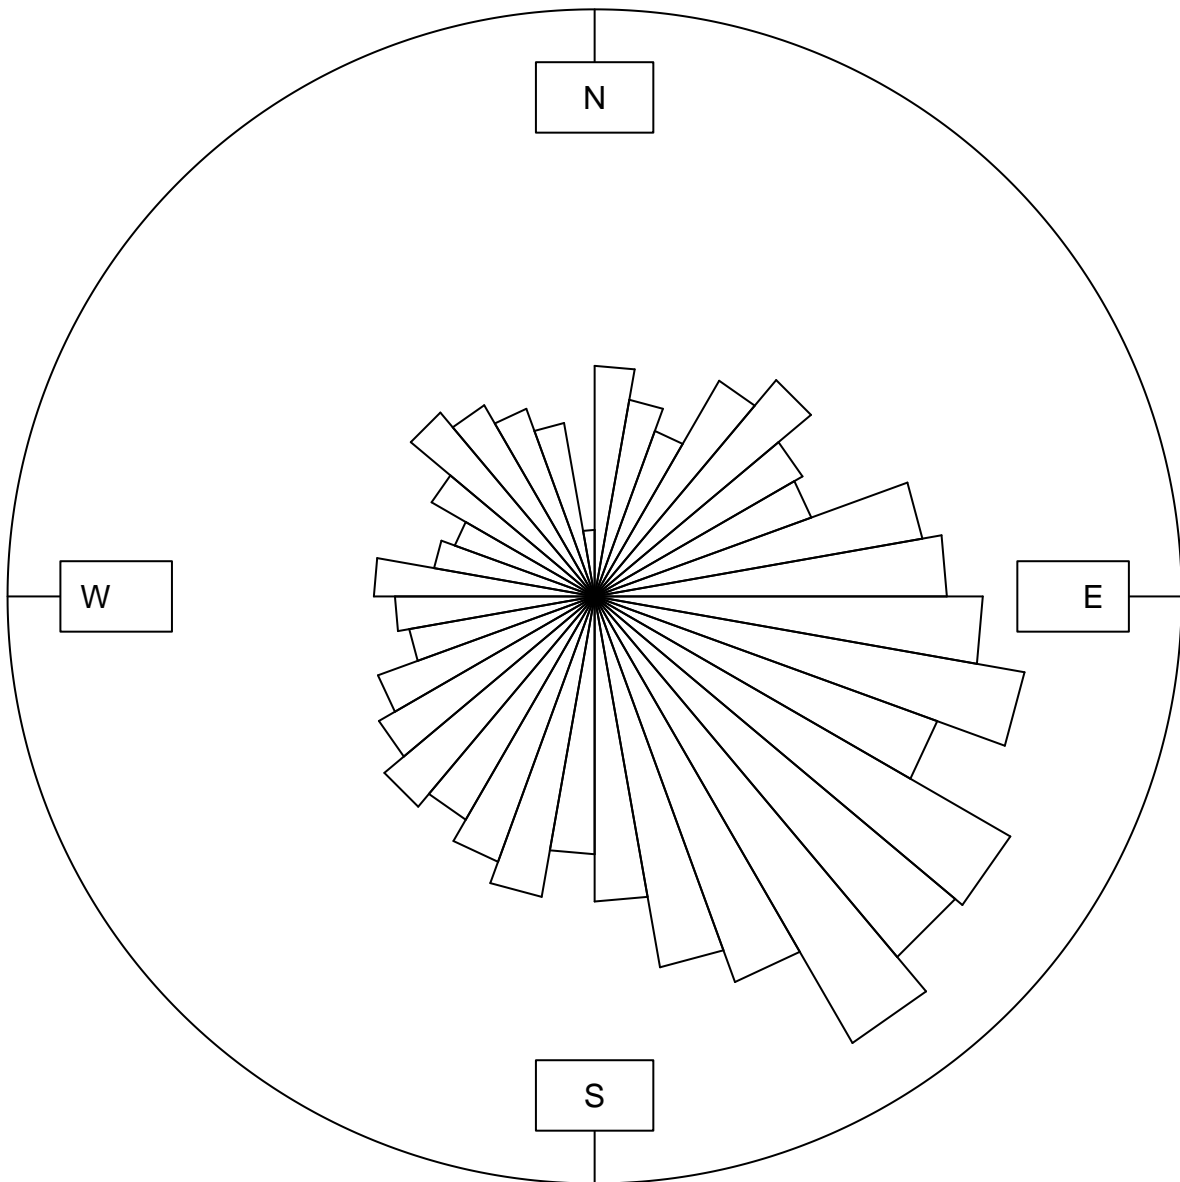



# bootstrap 305

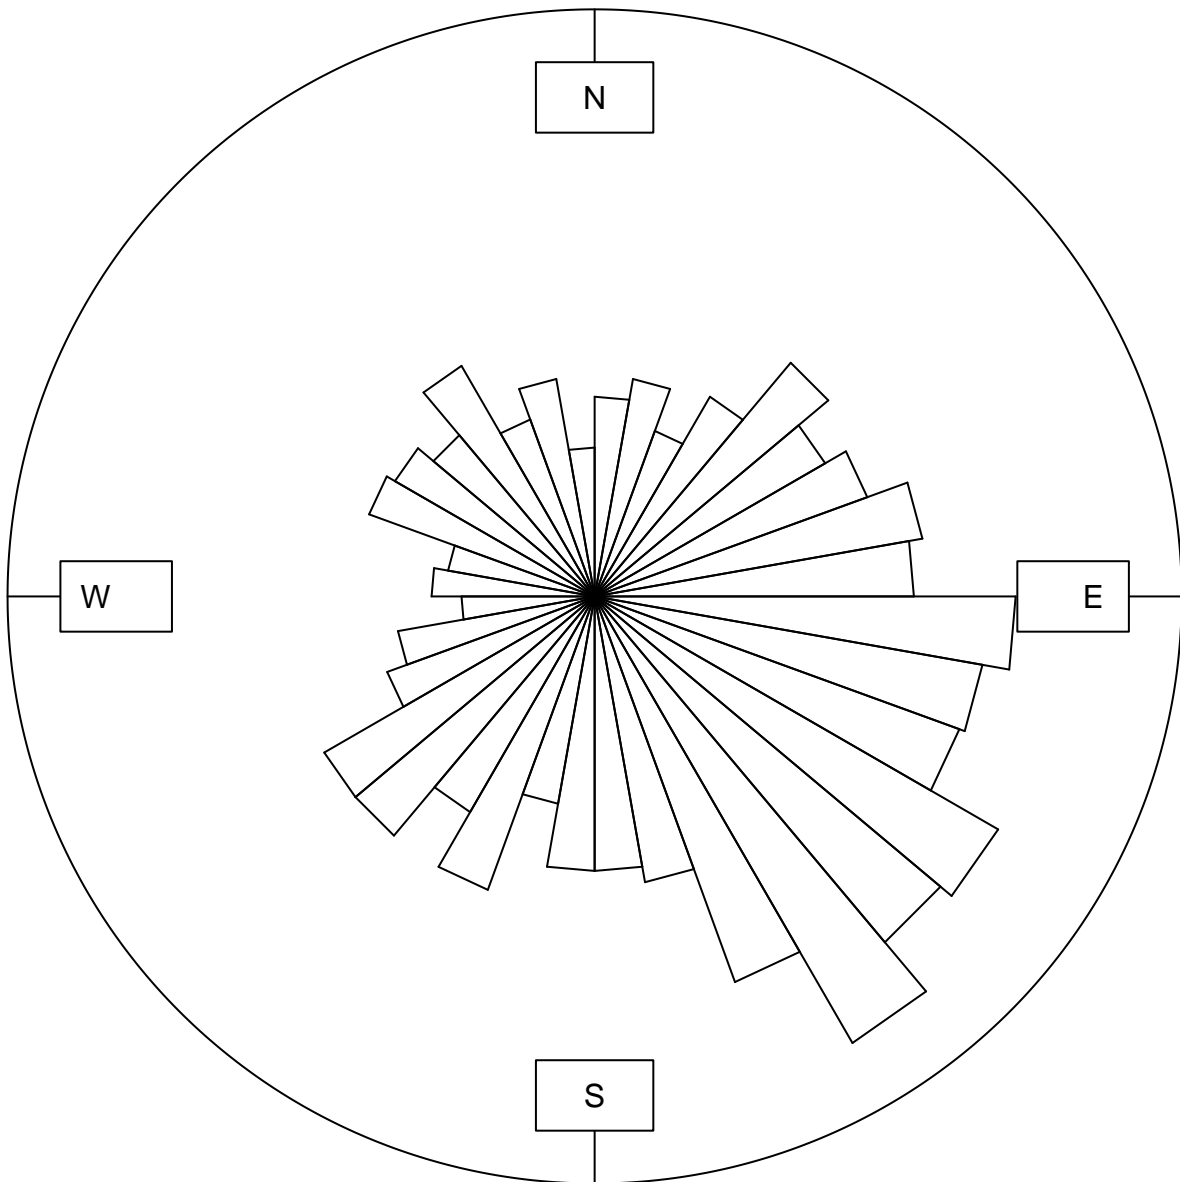

# bootstrap 306

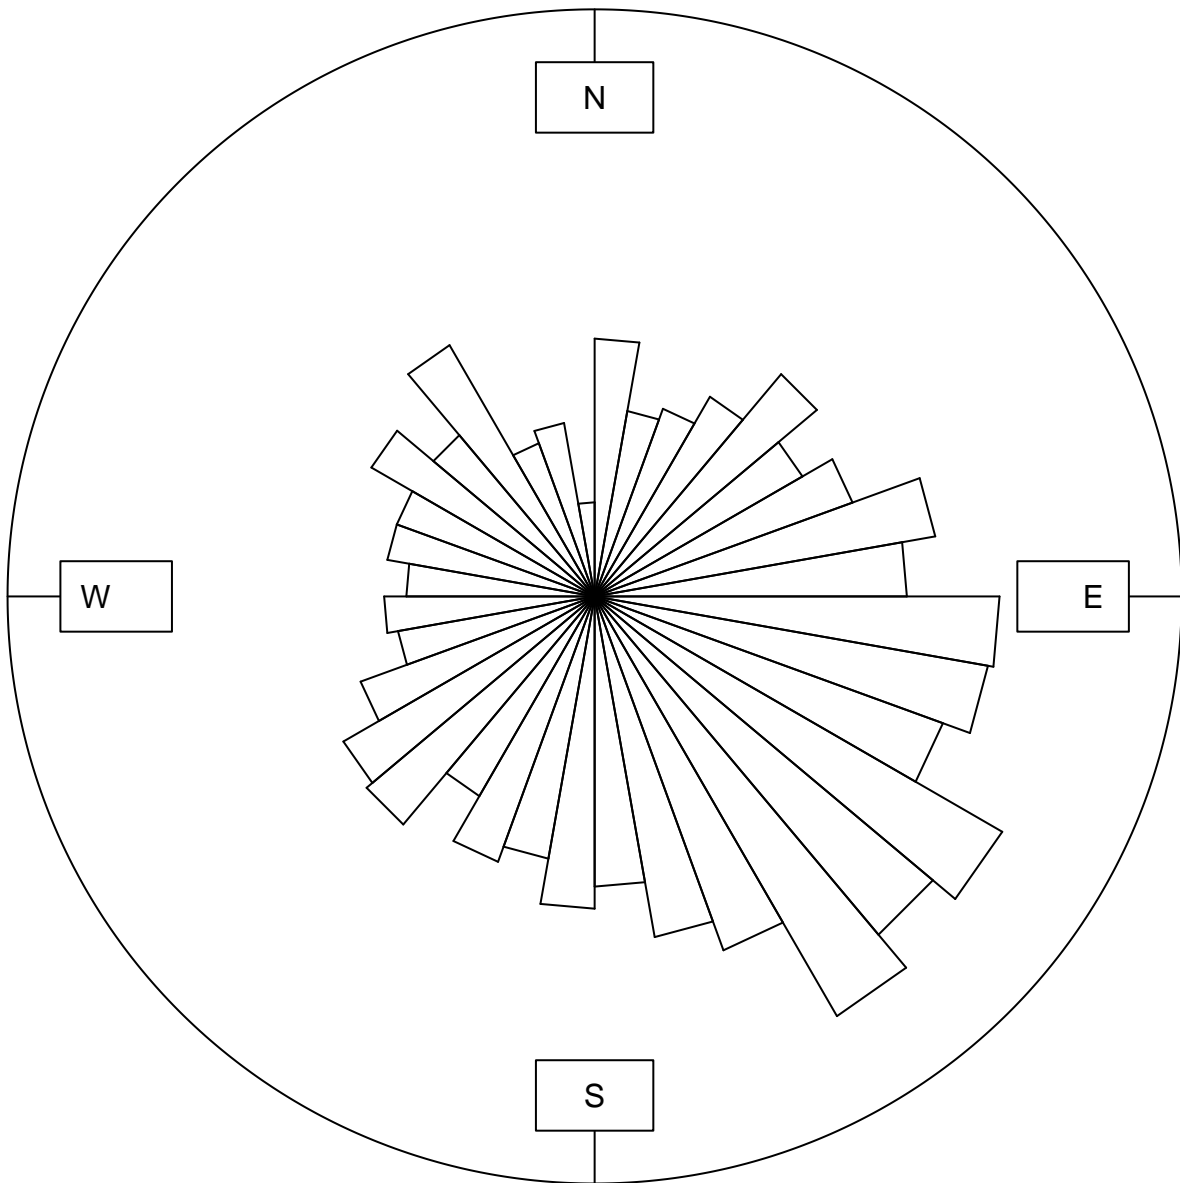

# bootstrap 307

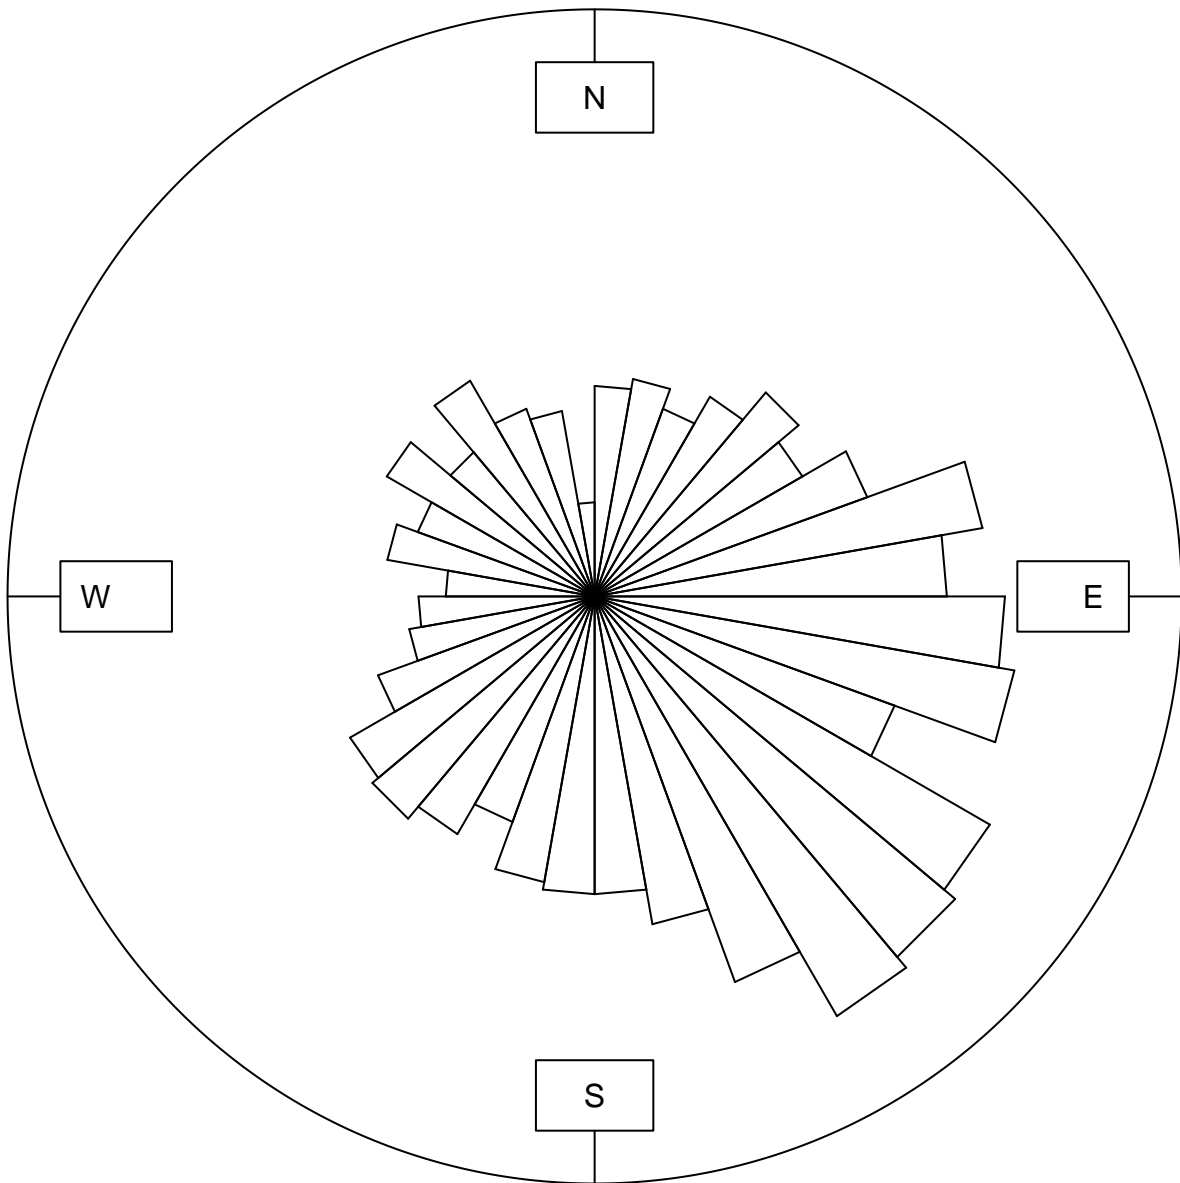

# bootstrap 308

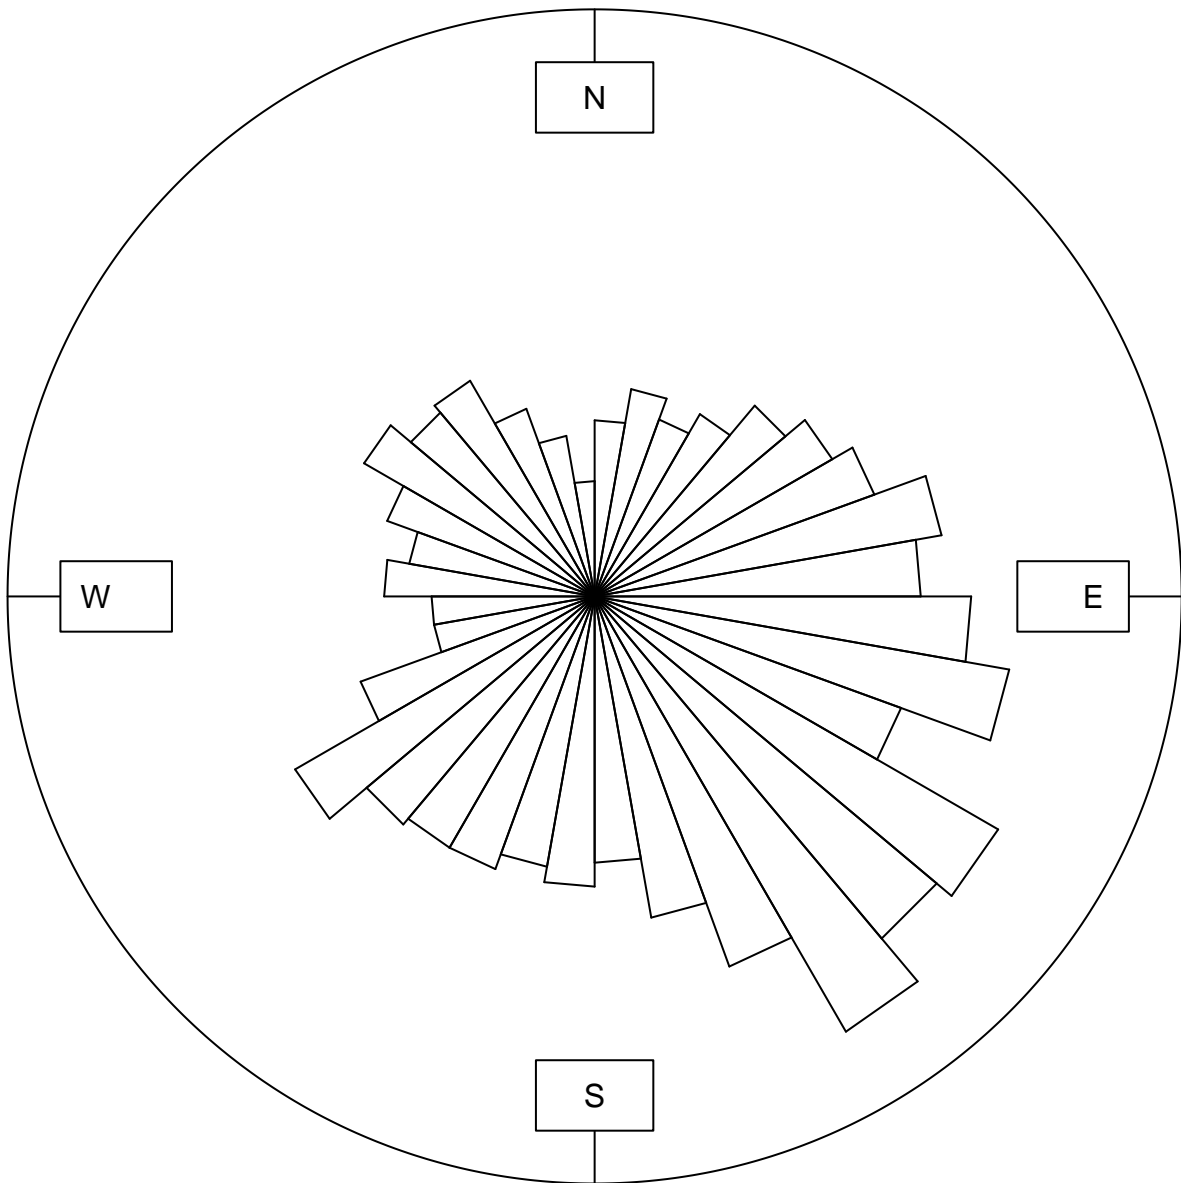

# bootstrap 309

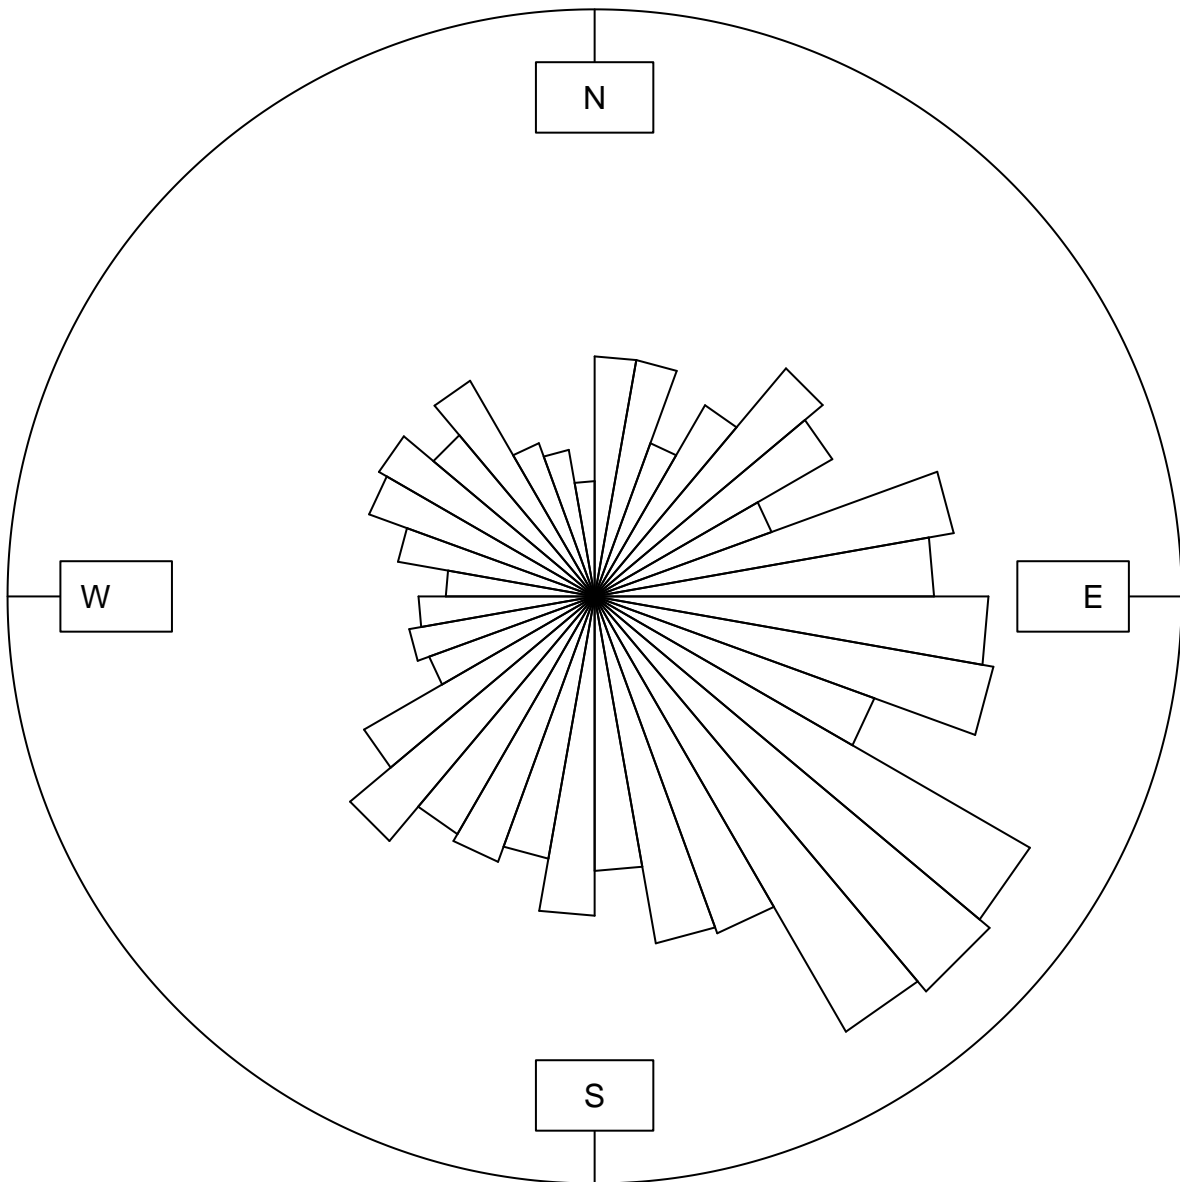

# bootstrap 310

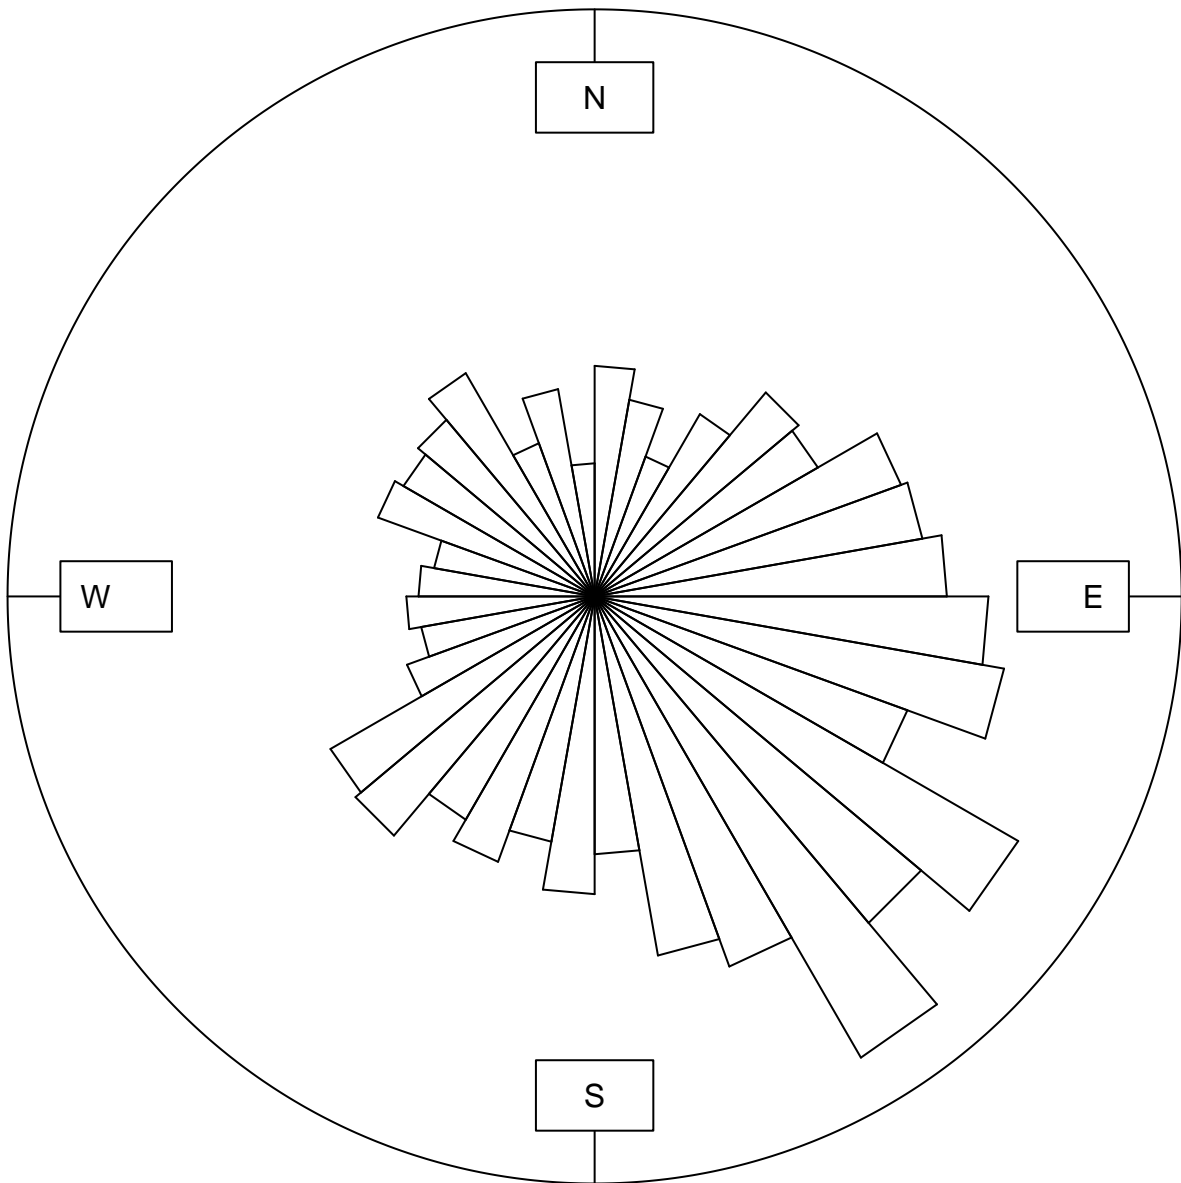

# bootstrap 311

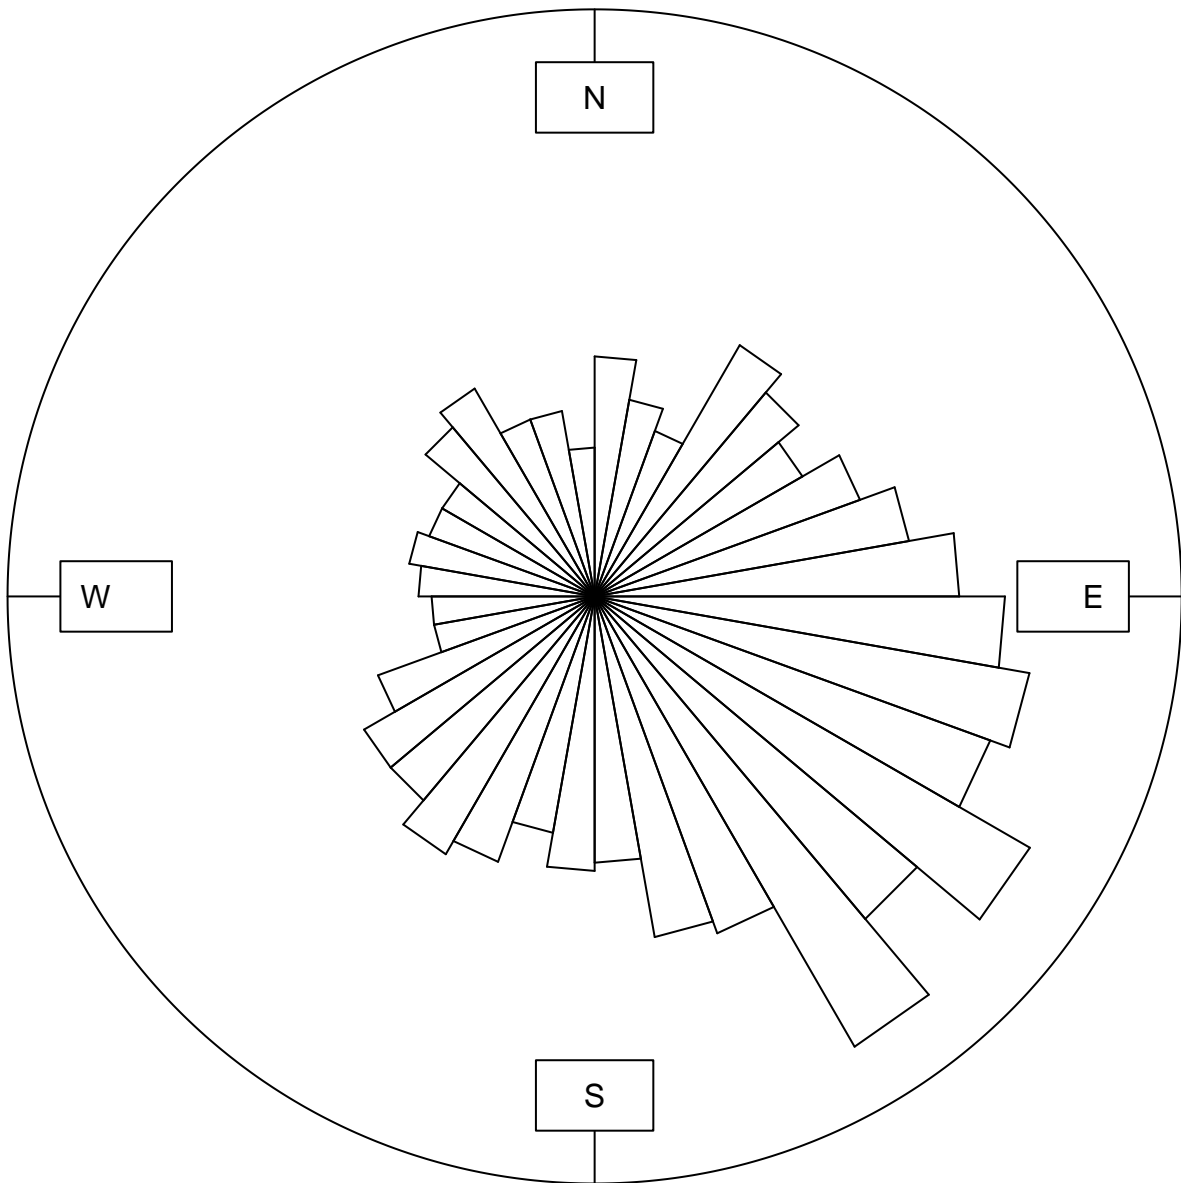

# bootstrap 312

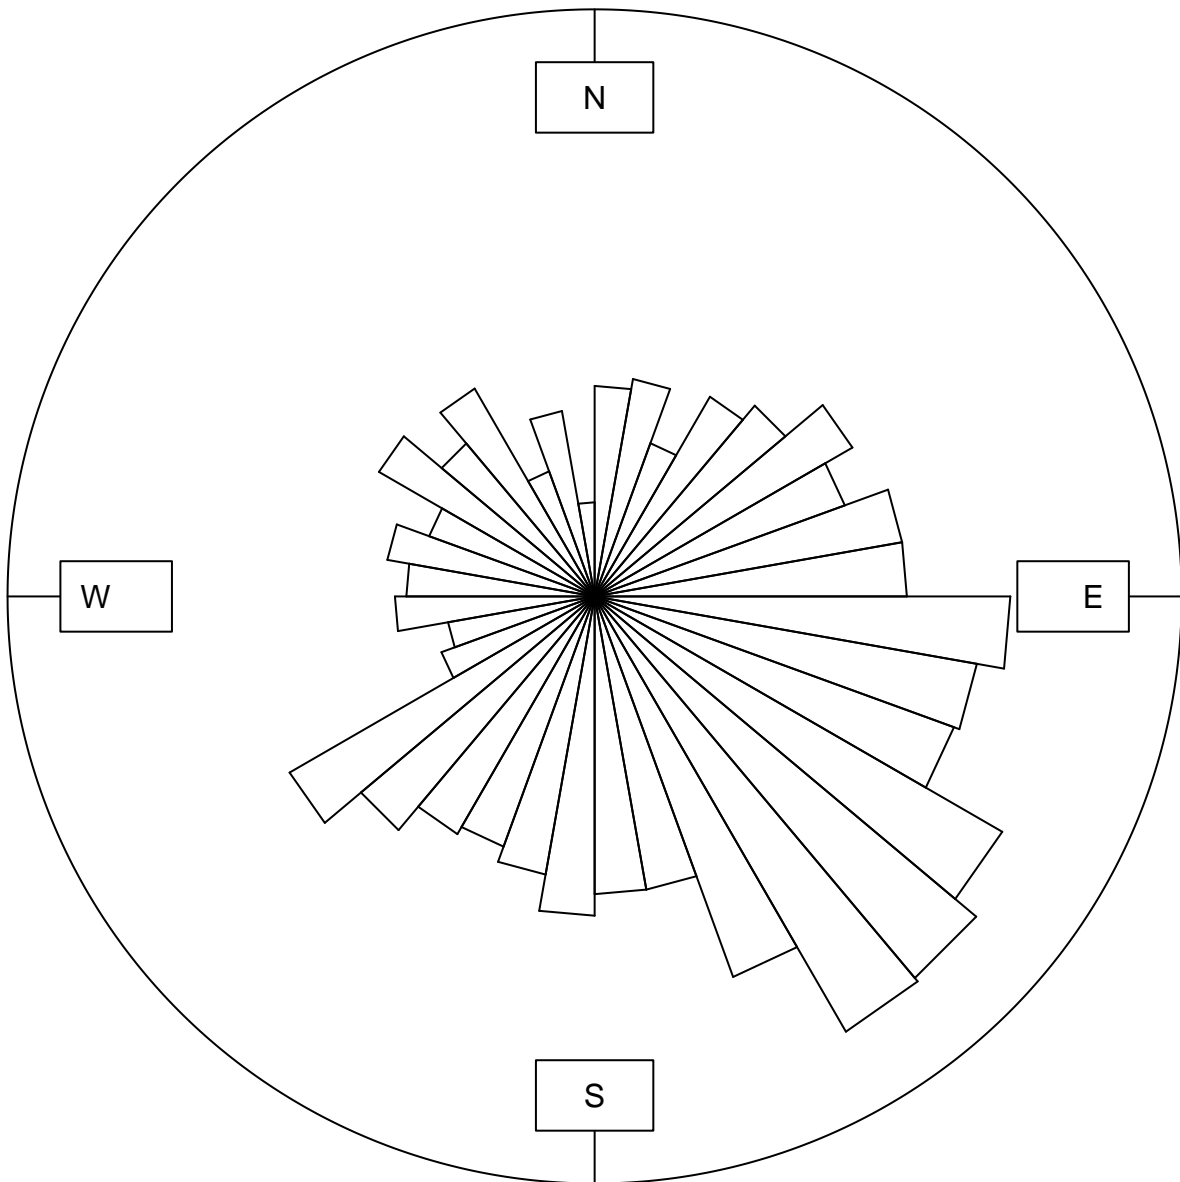



# bootstrap 313

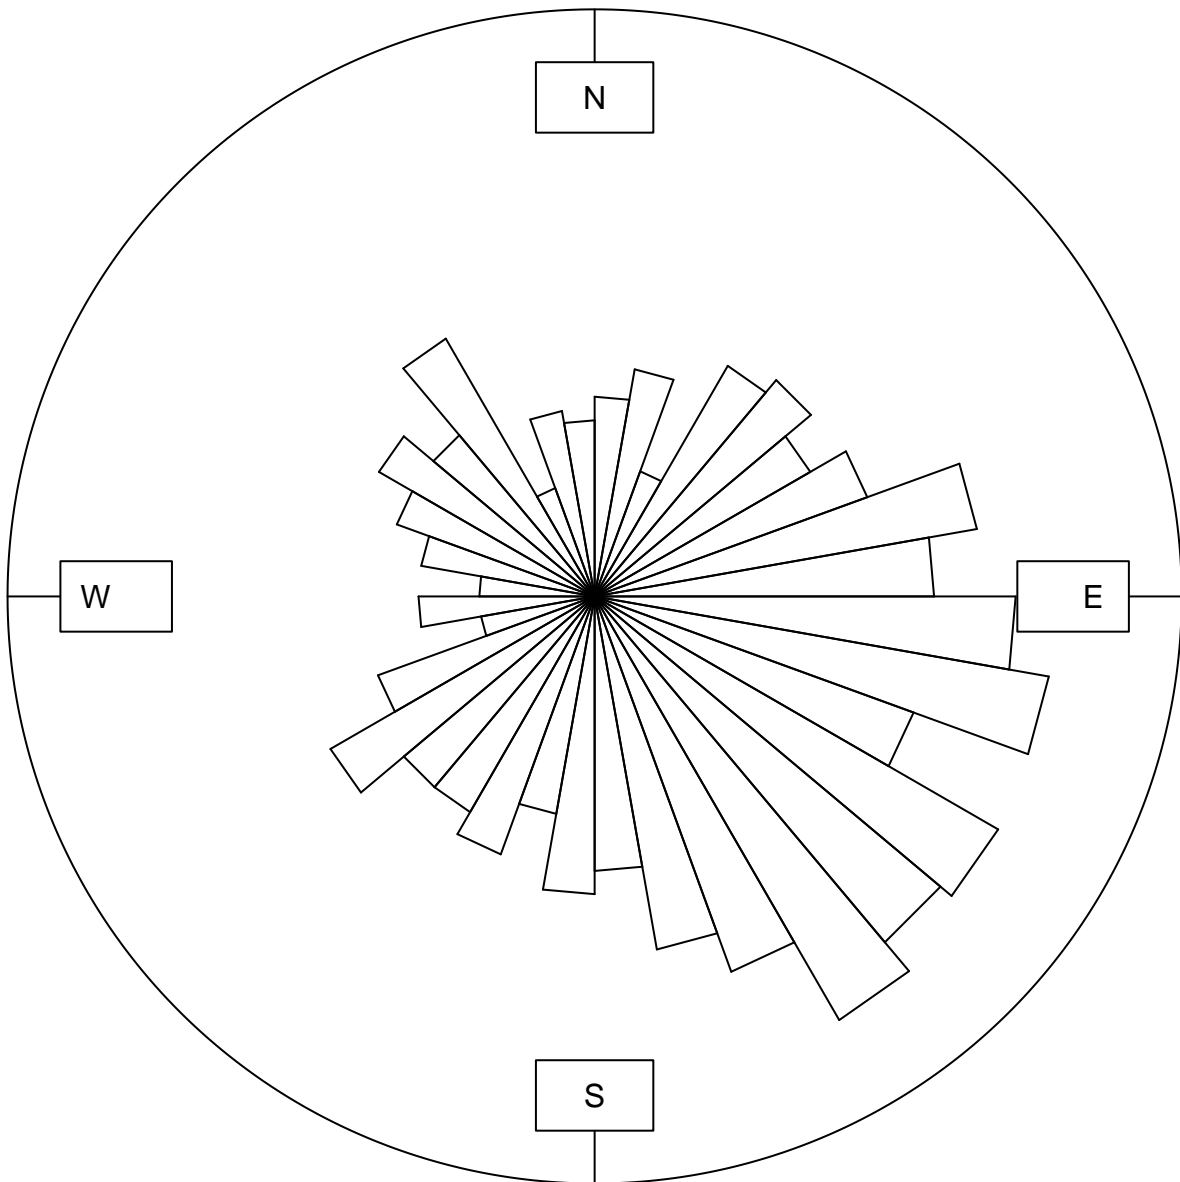

# bootstrap 314

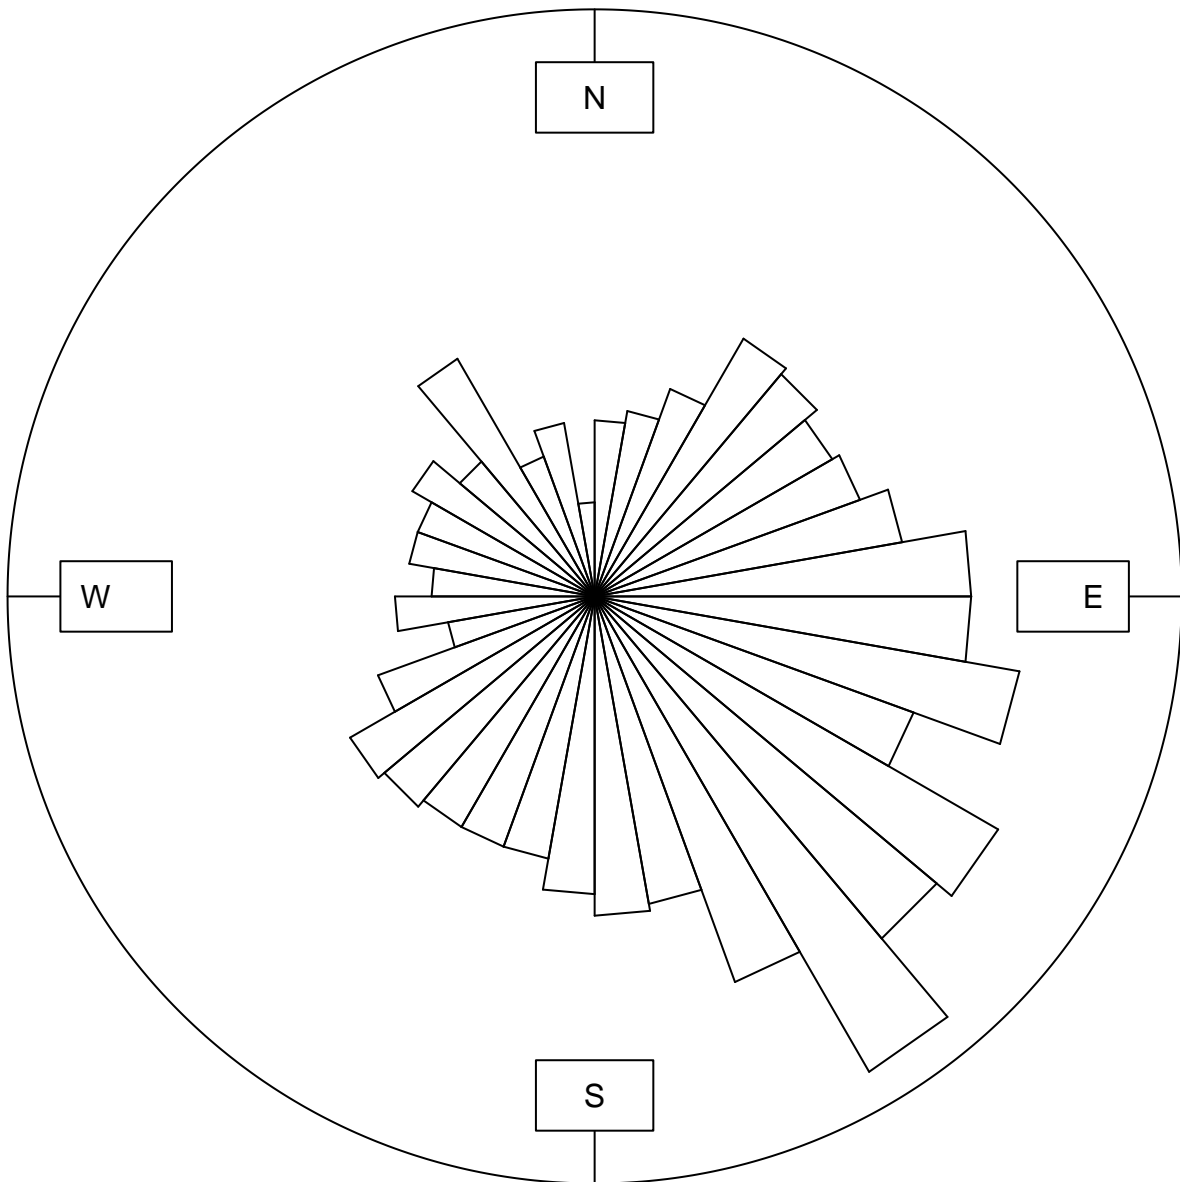

# bootstrap 315

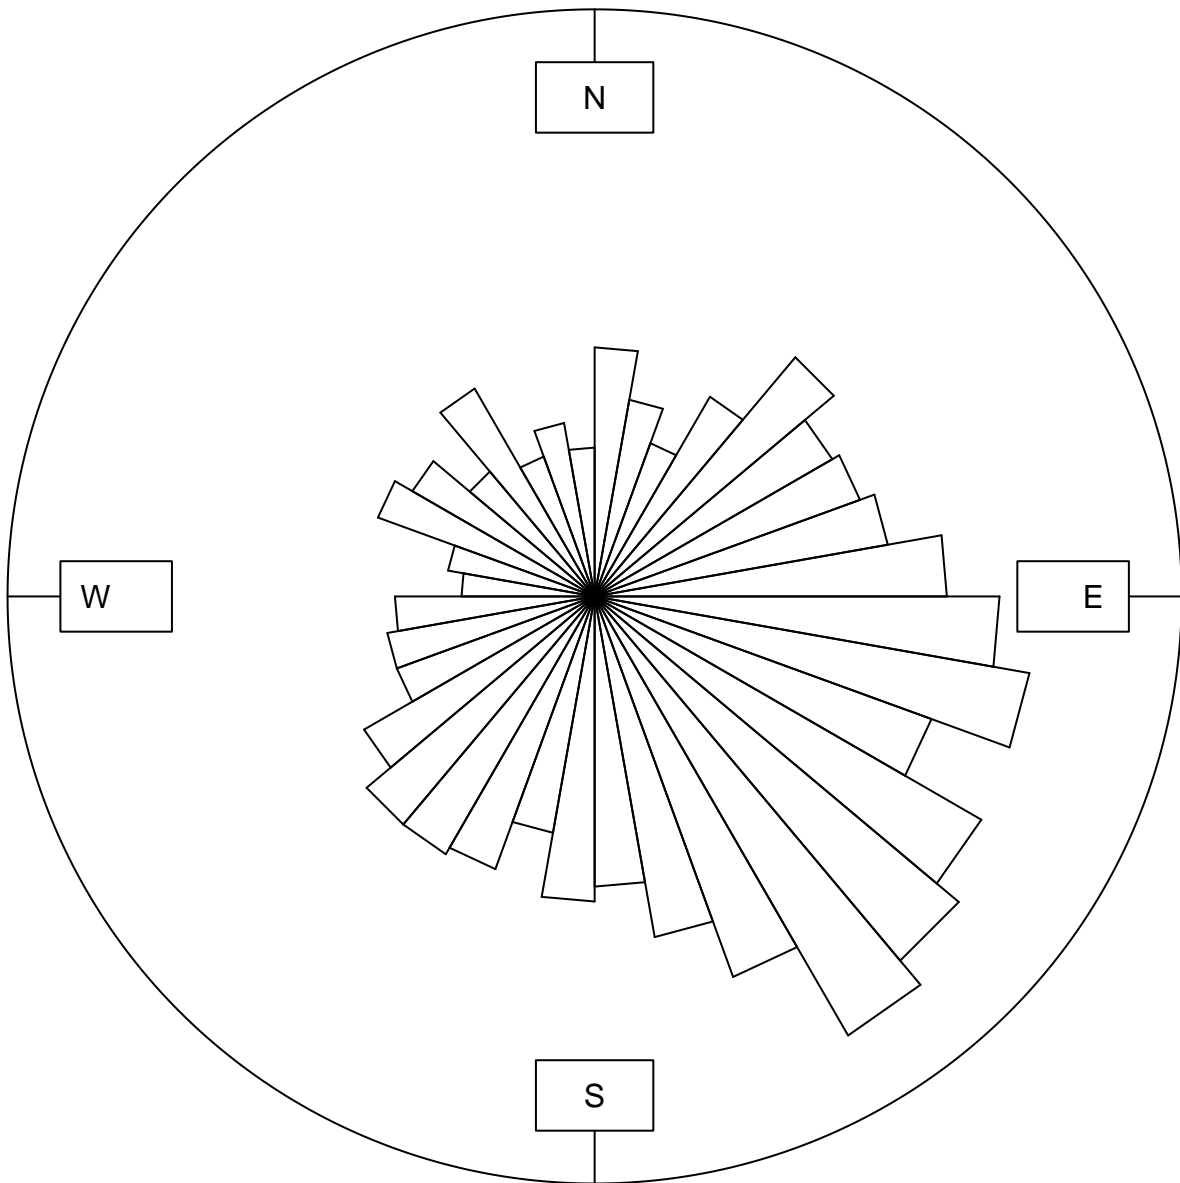

# bootstrap 316

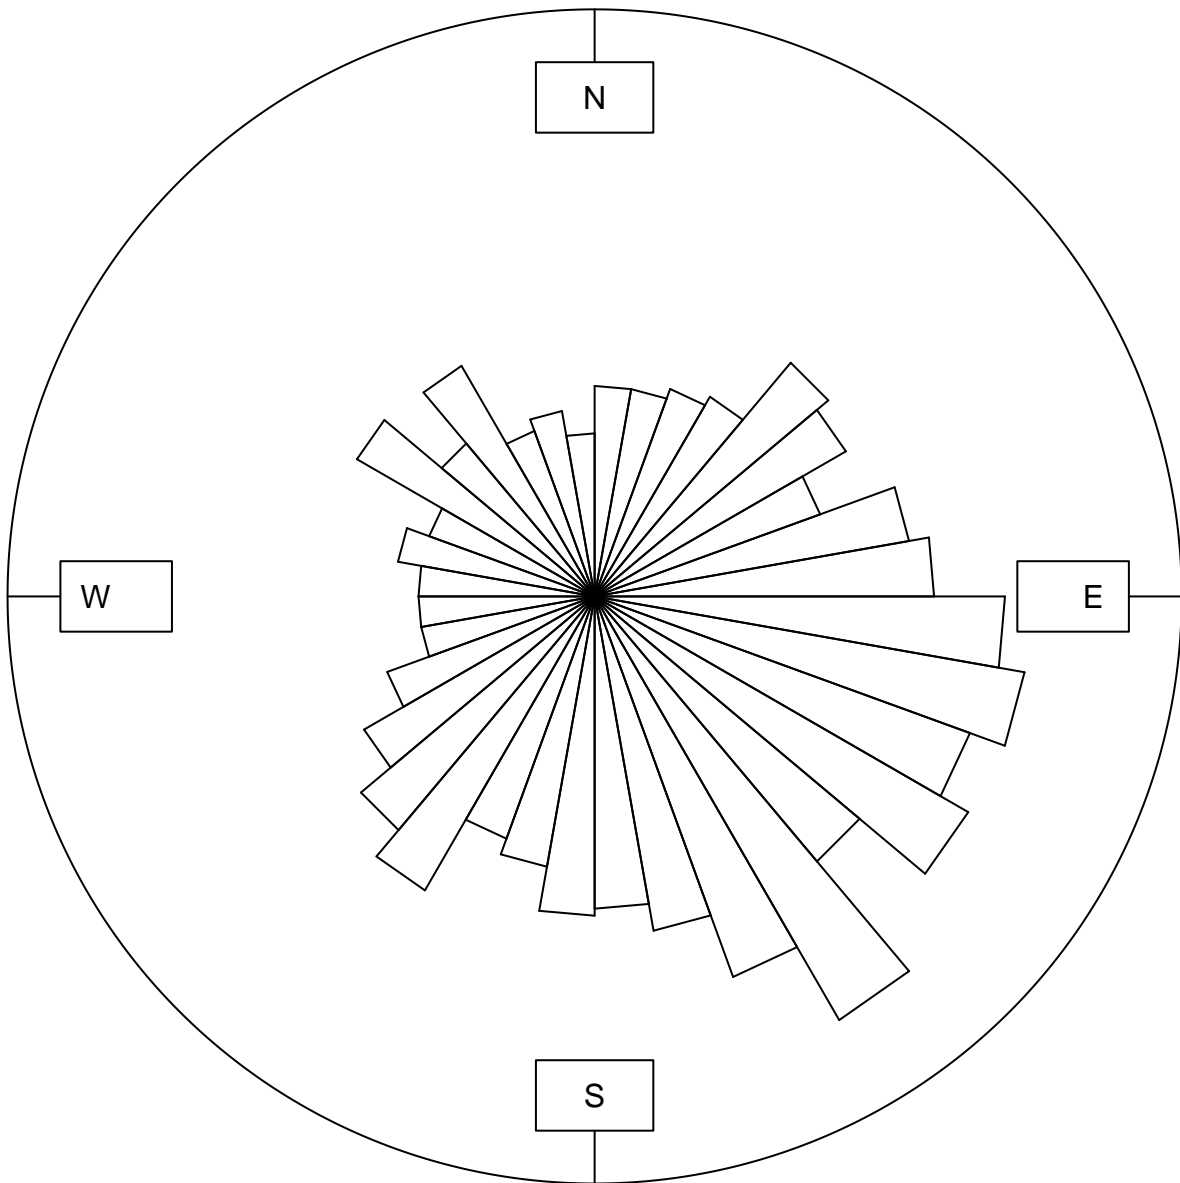

# bootstrap 317

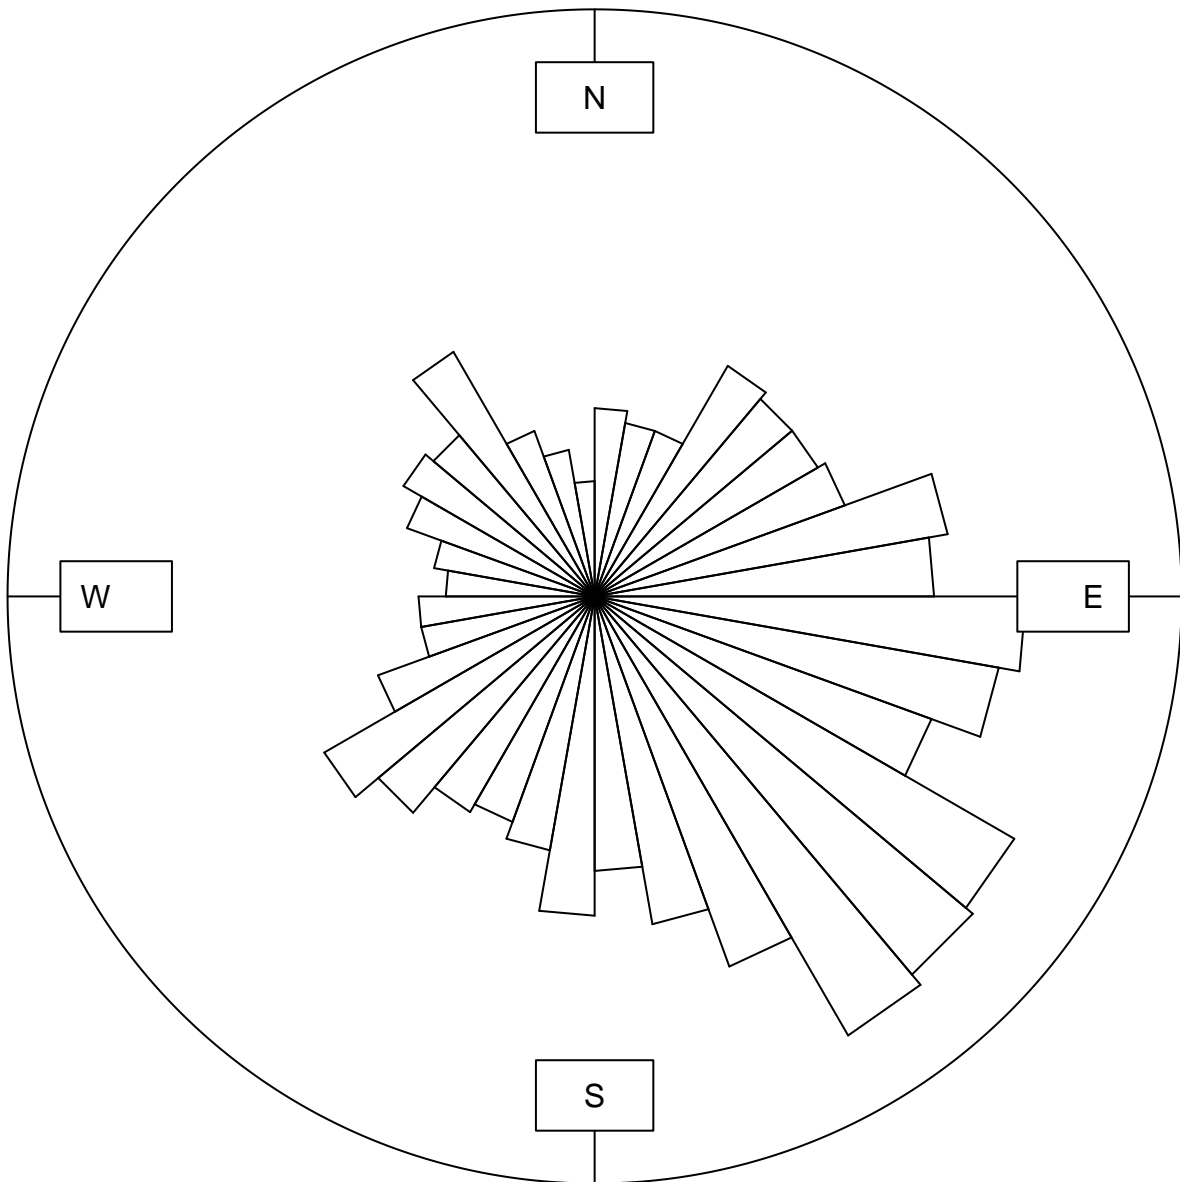

# bootstrap 318

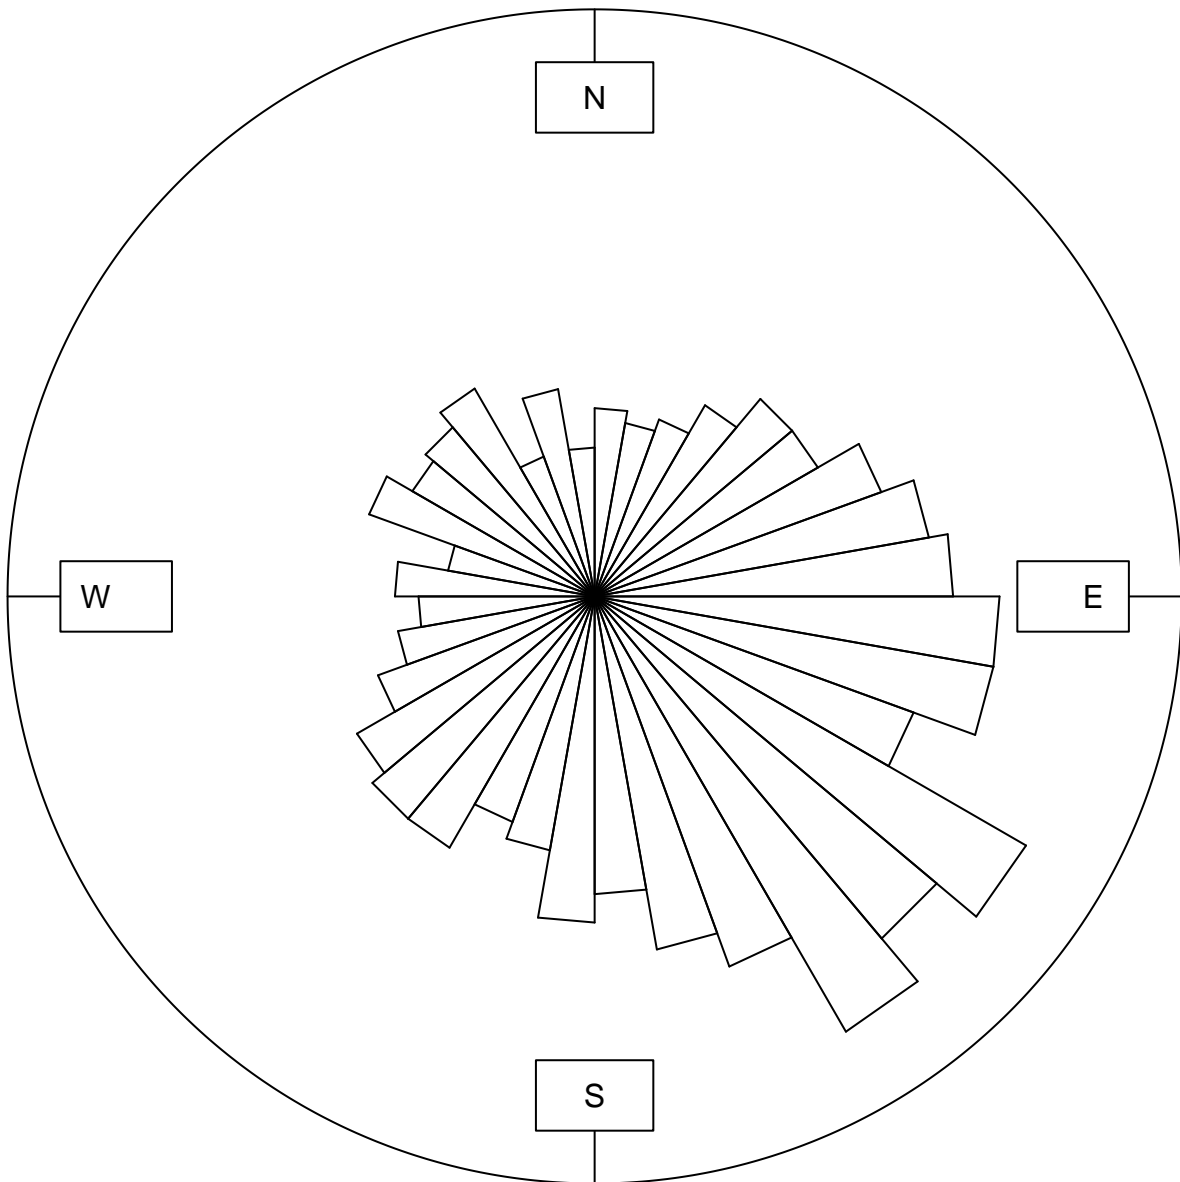

# bootstrap 319

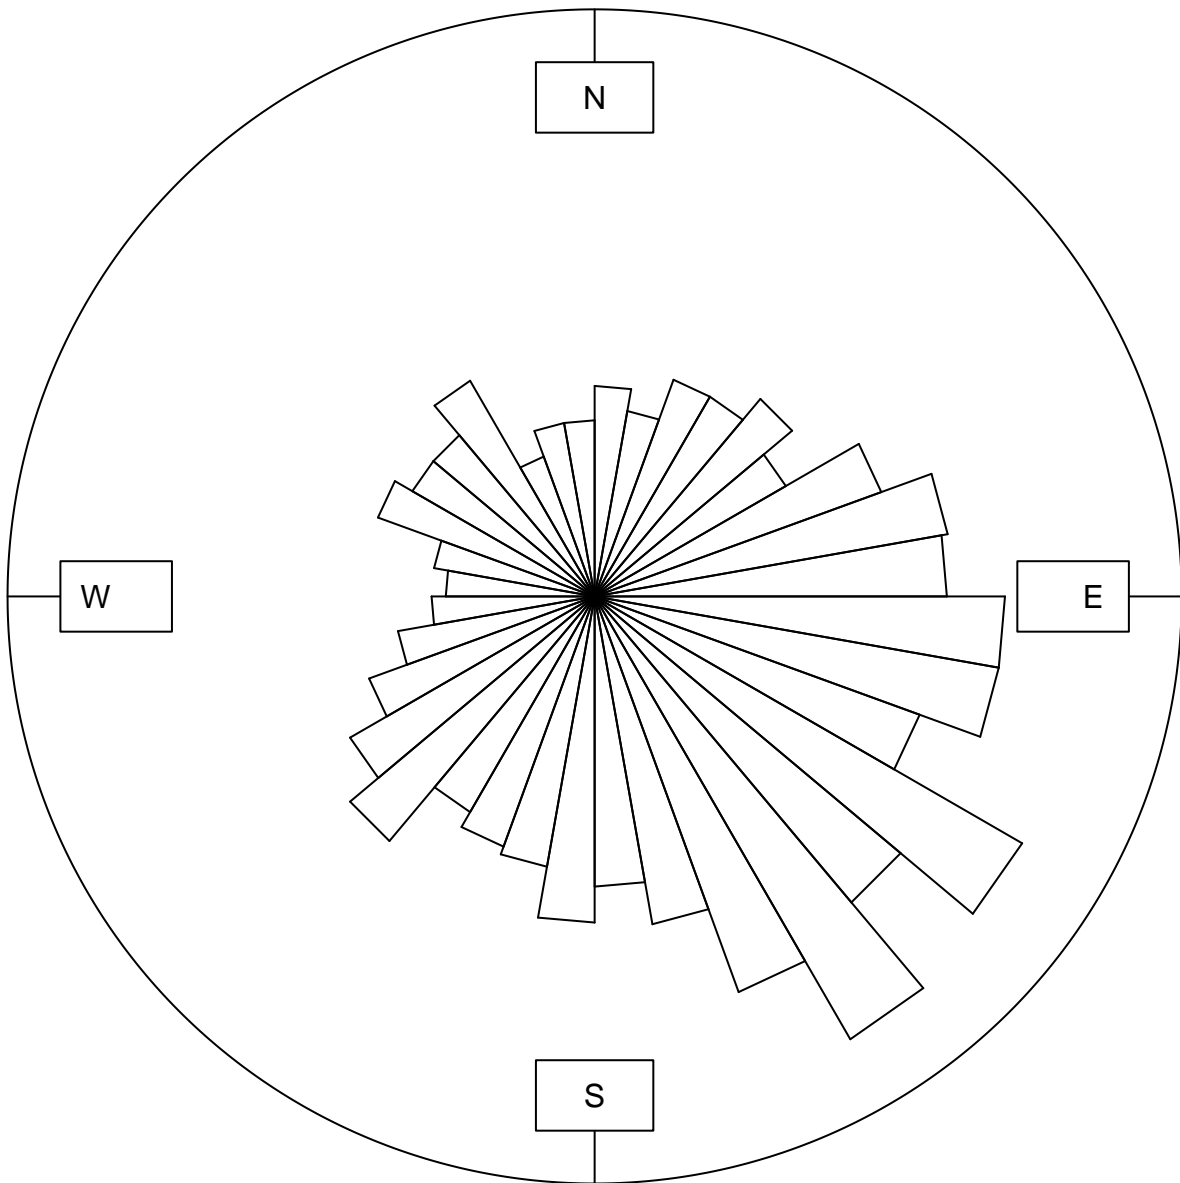

# bootstrap 320

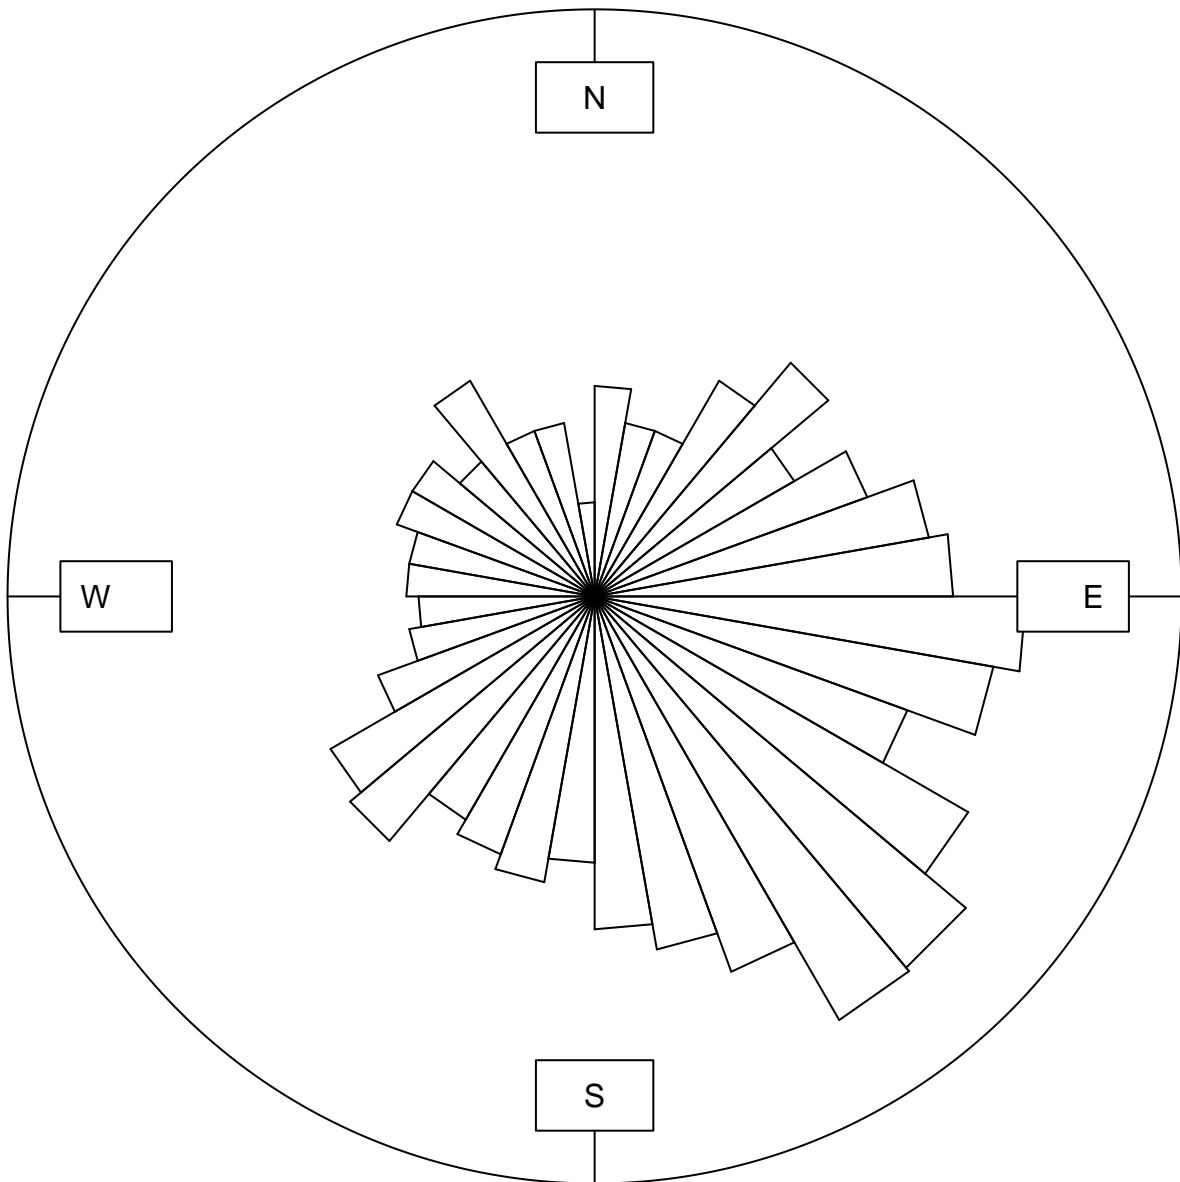





# bootstrap 322

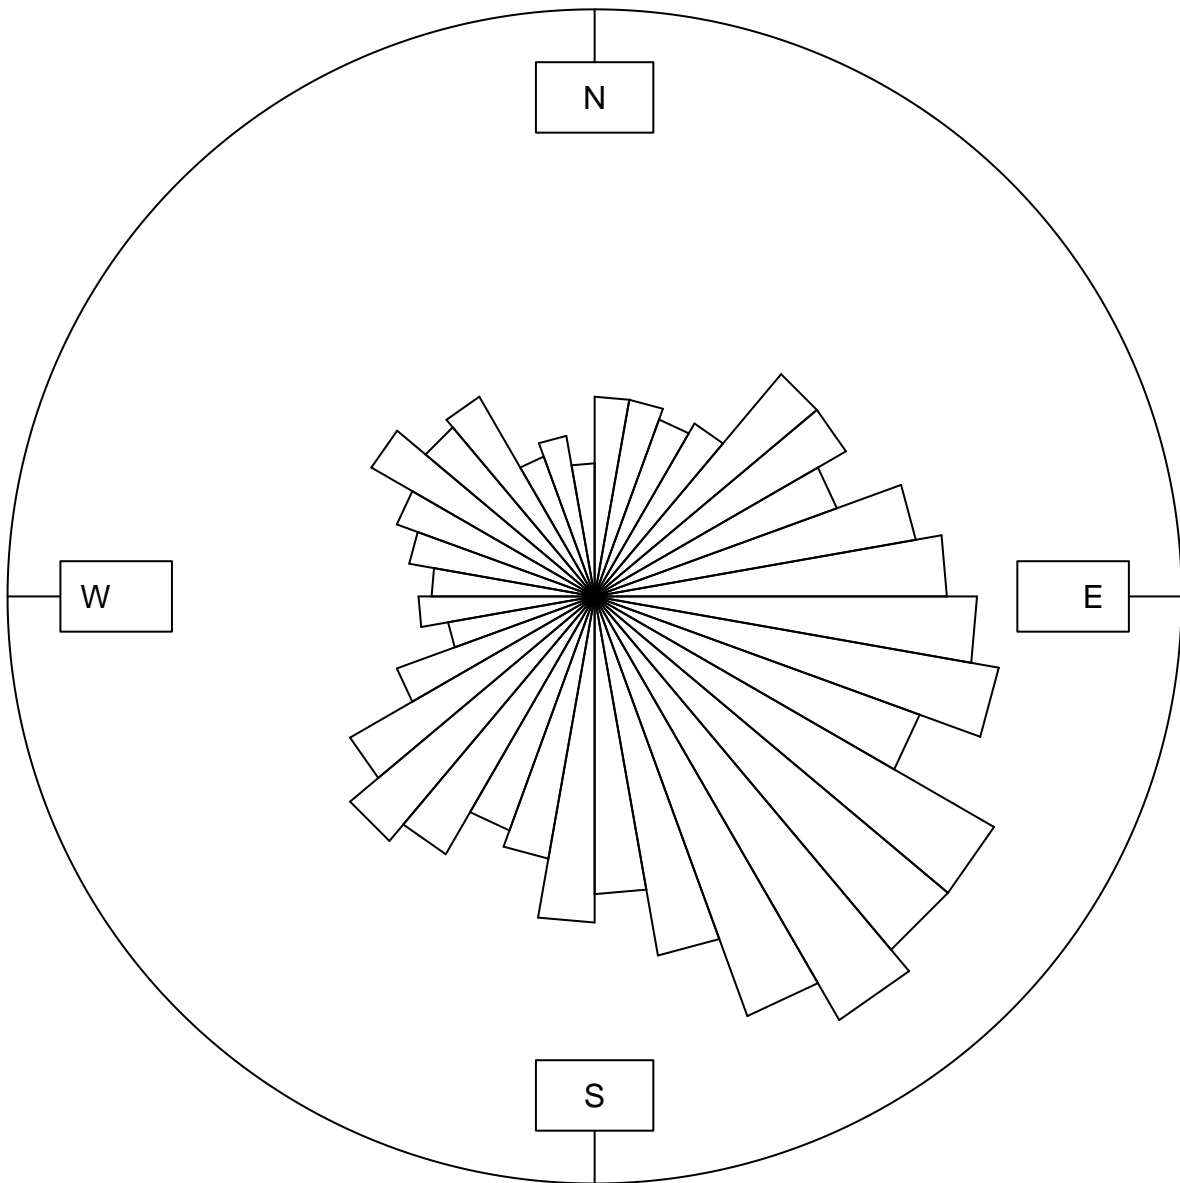

# bootstrap 323

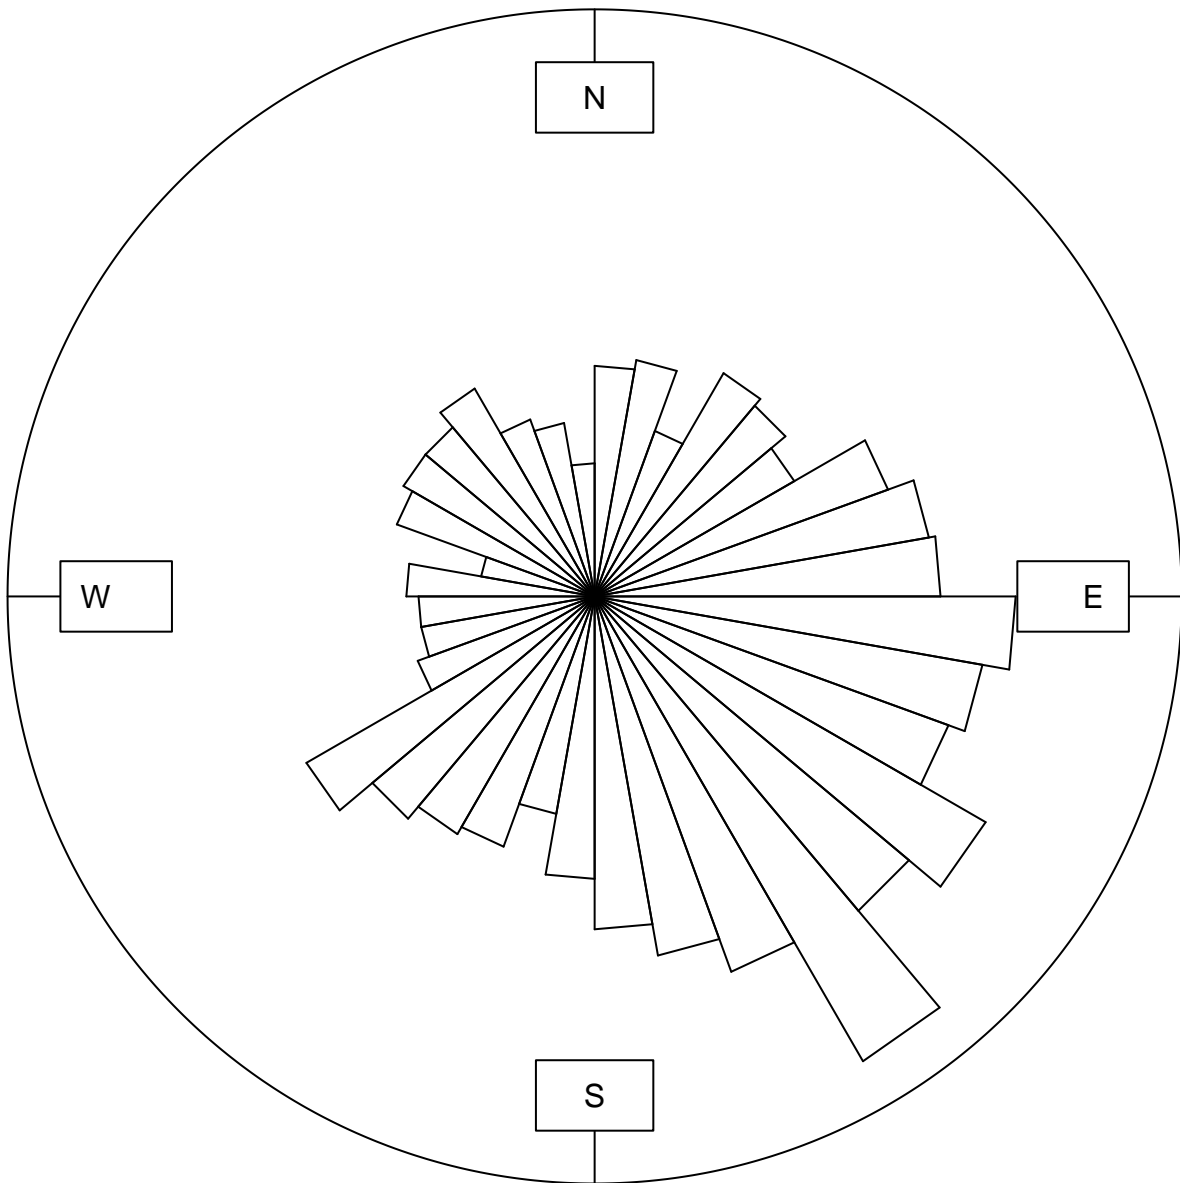

# bootstrap 324

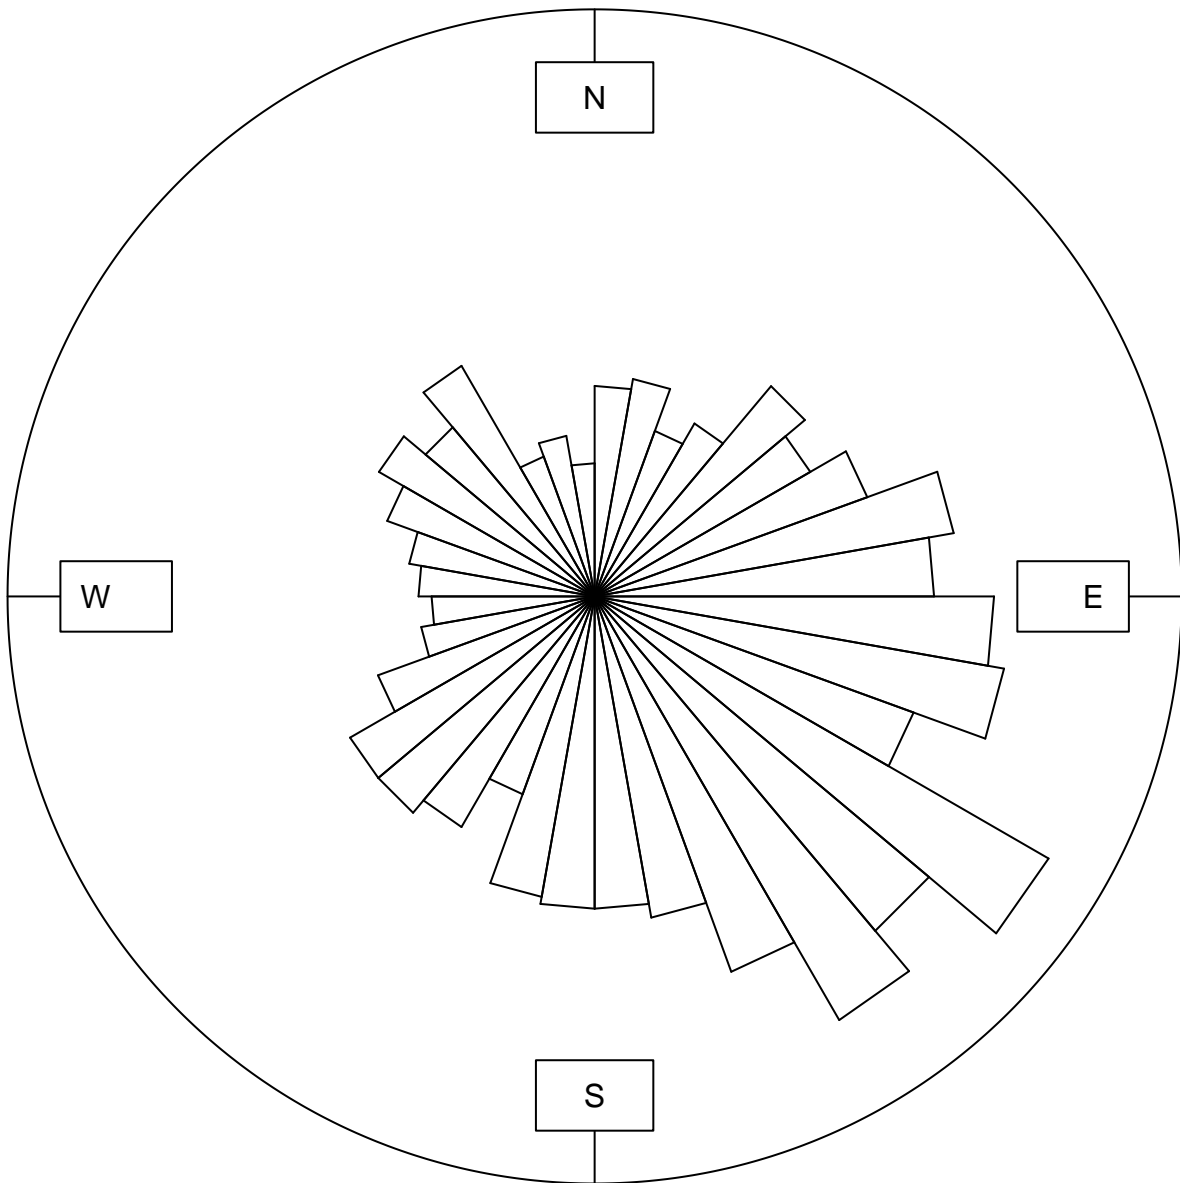

# bootstrap 325

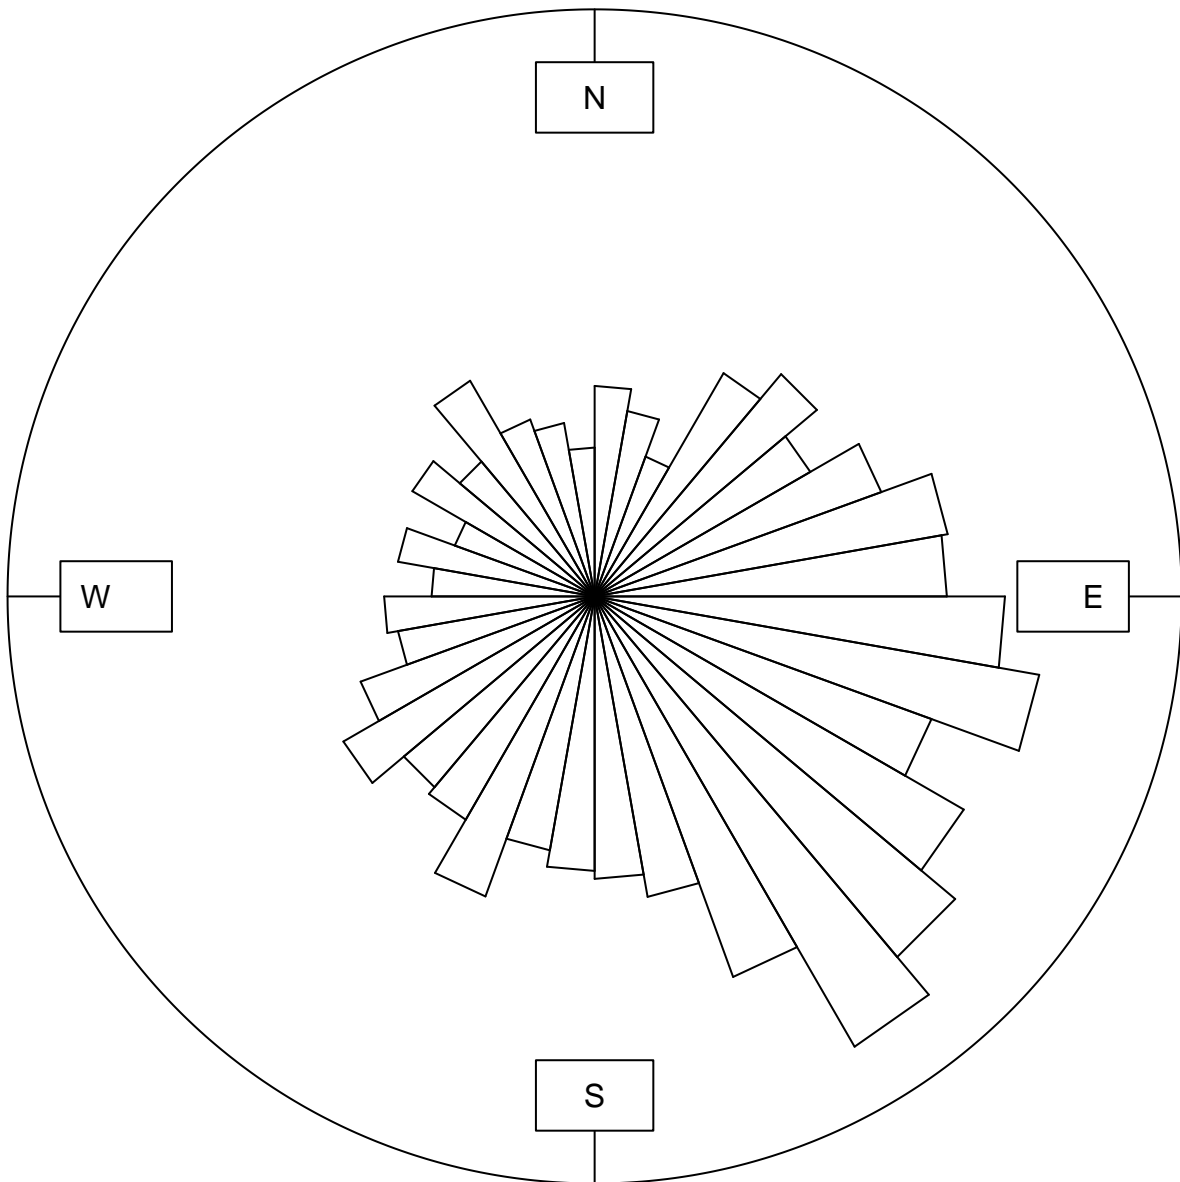

# bootstrap 326

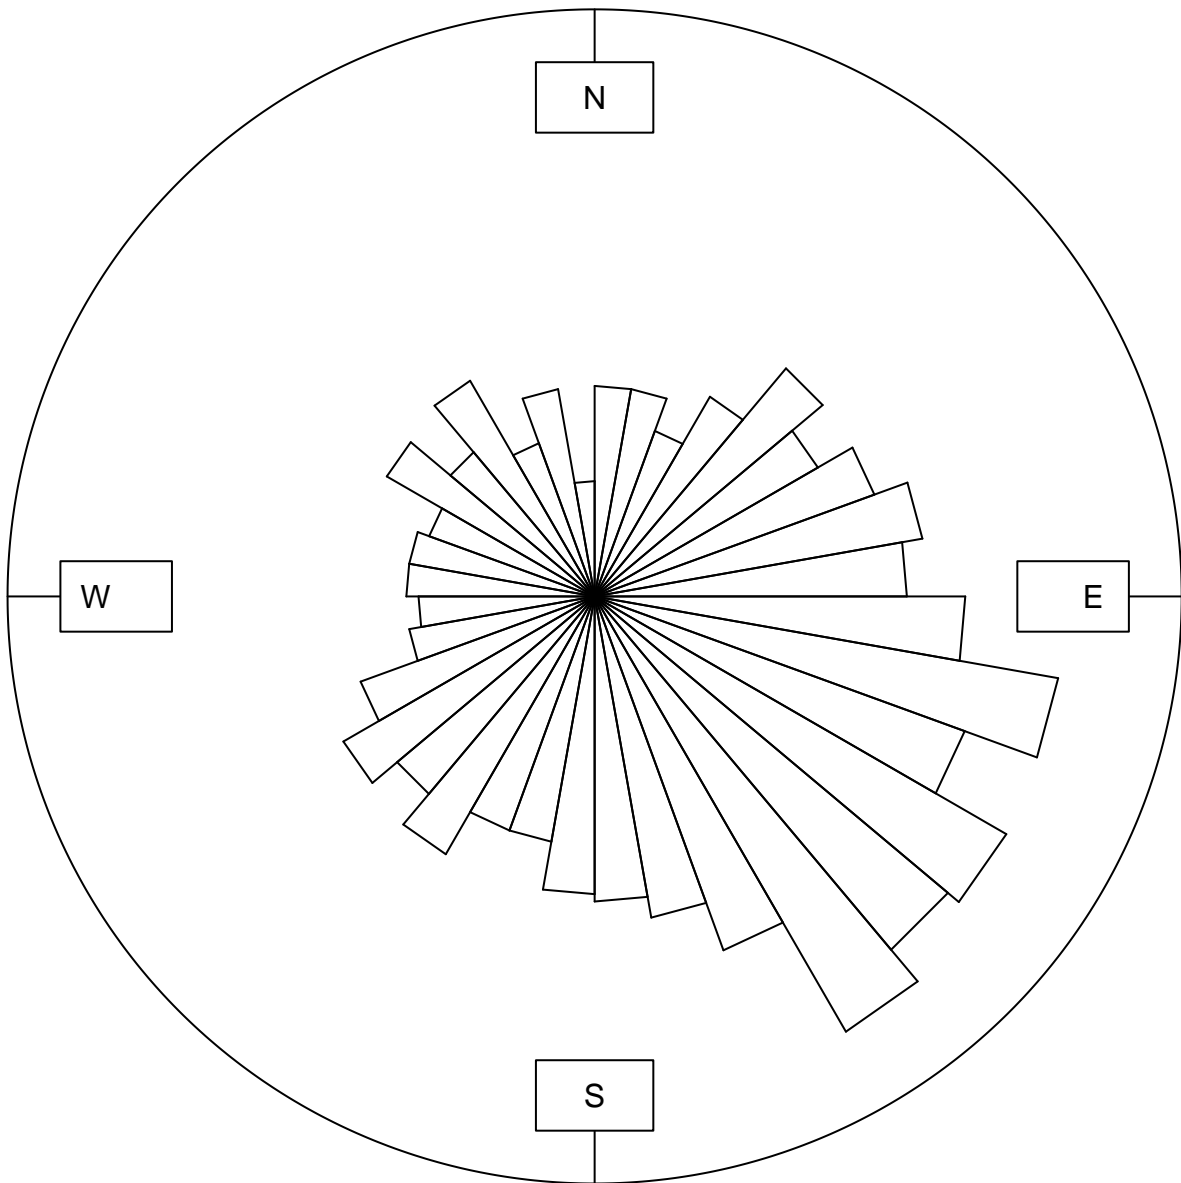

# bootstrap 327

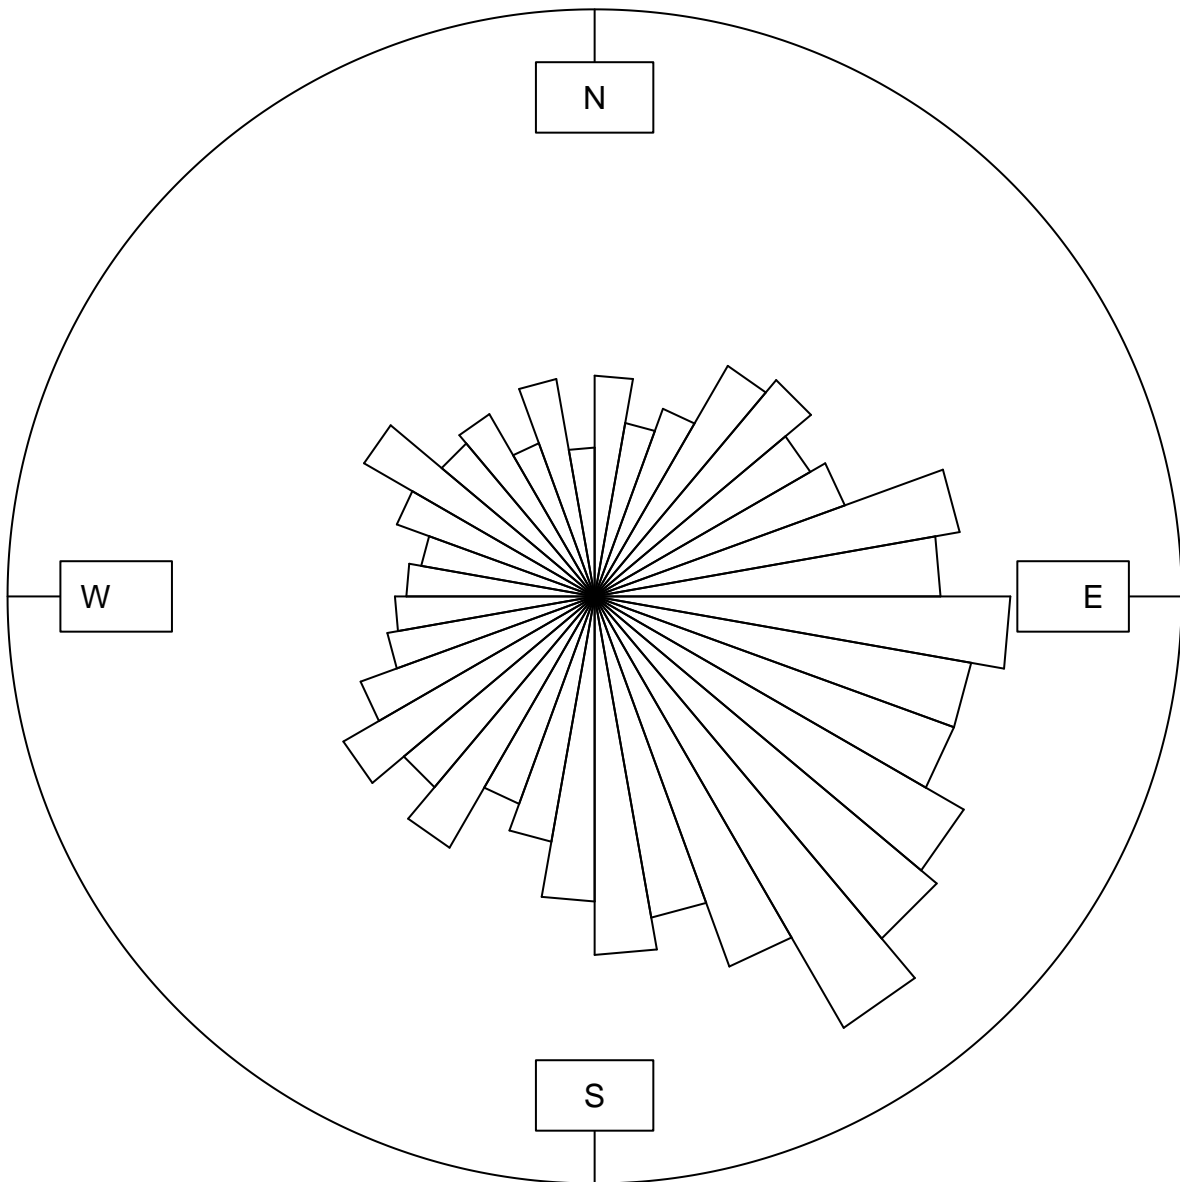

# bootstrap 328

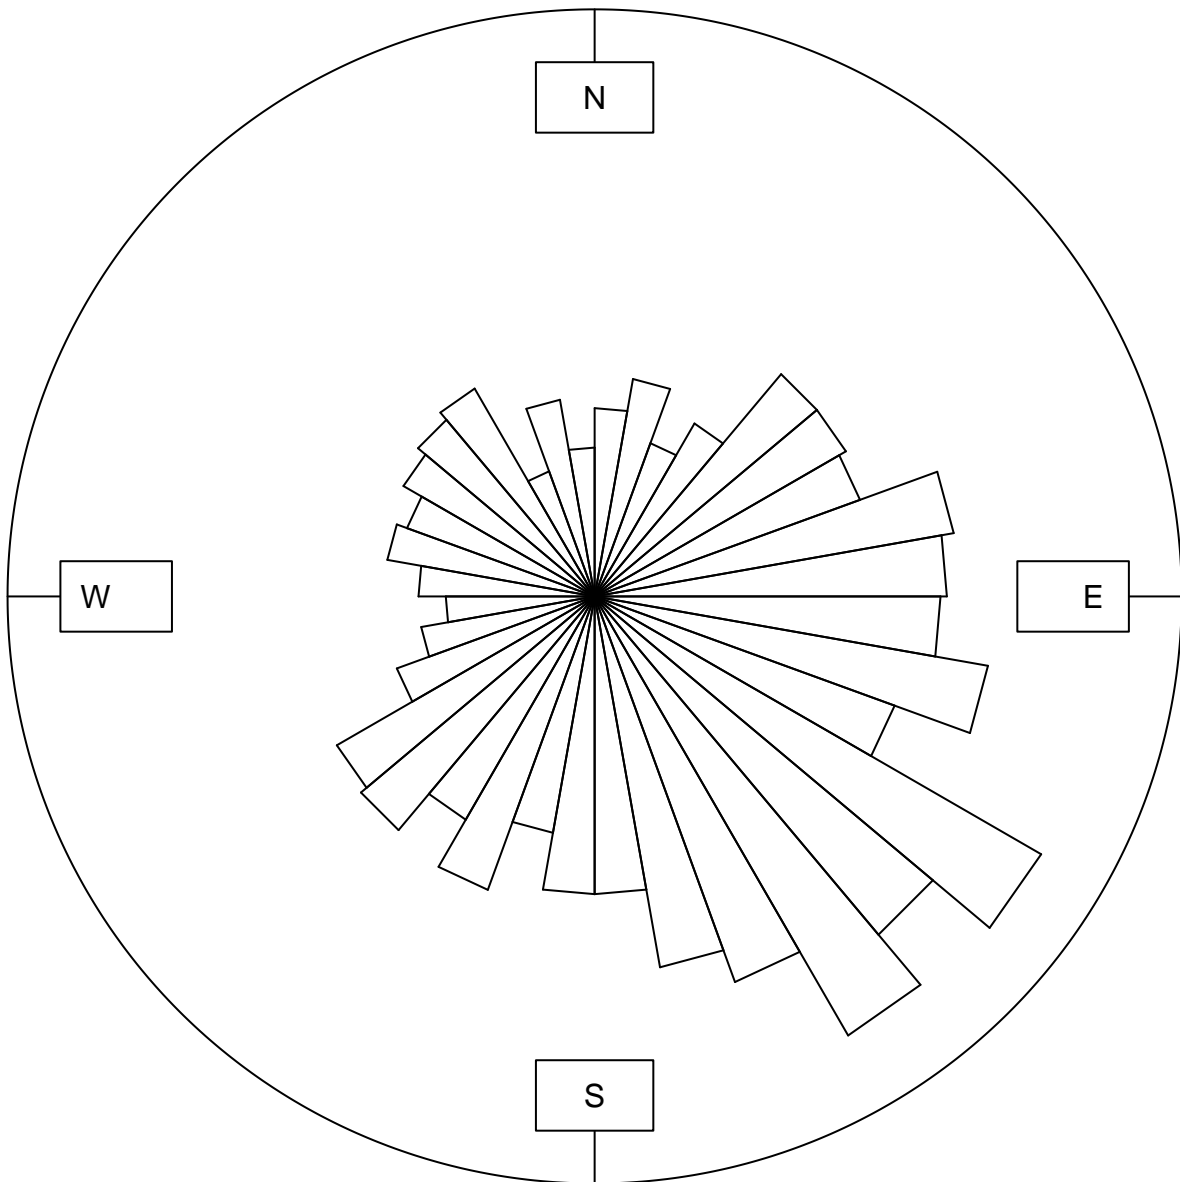



# bootstrap 329

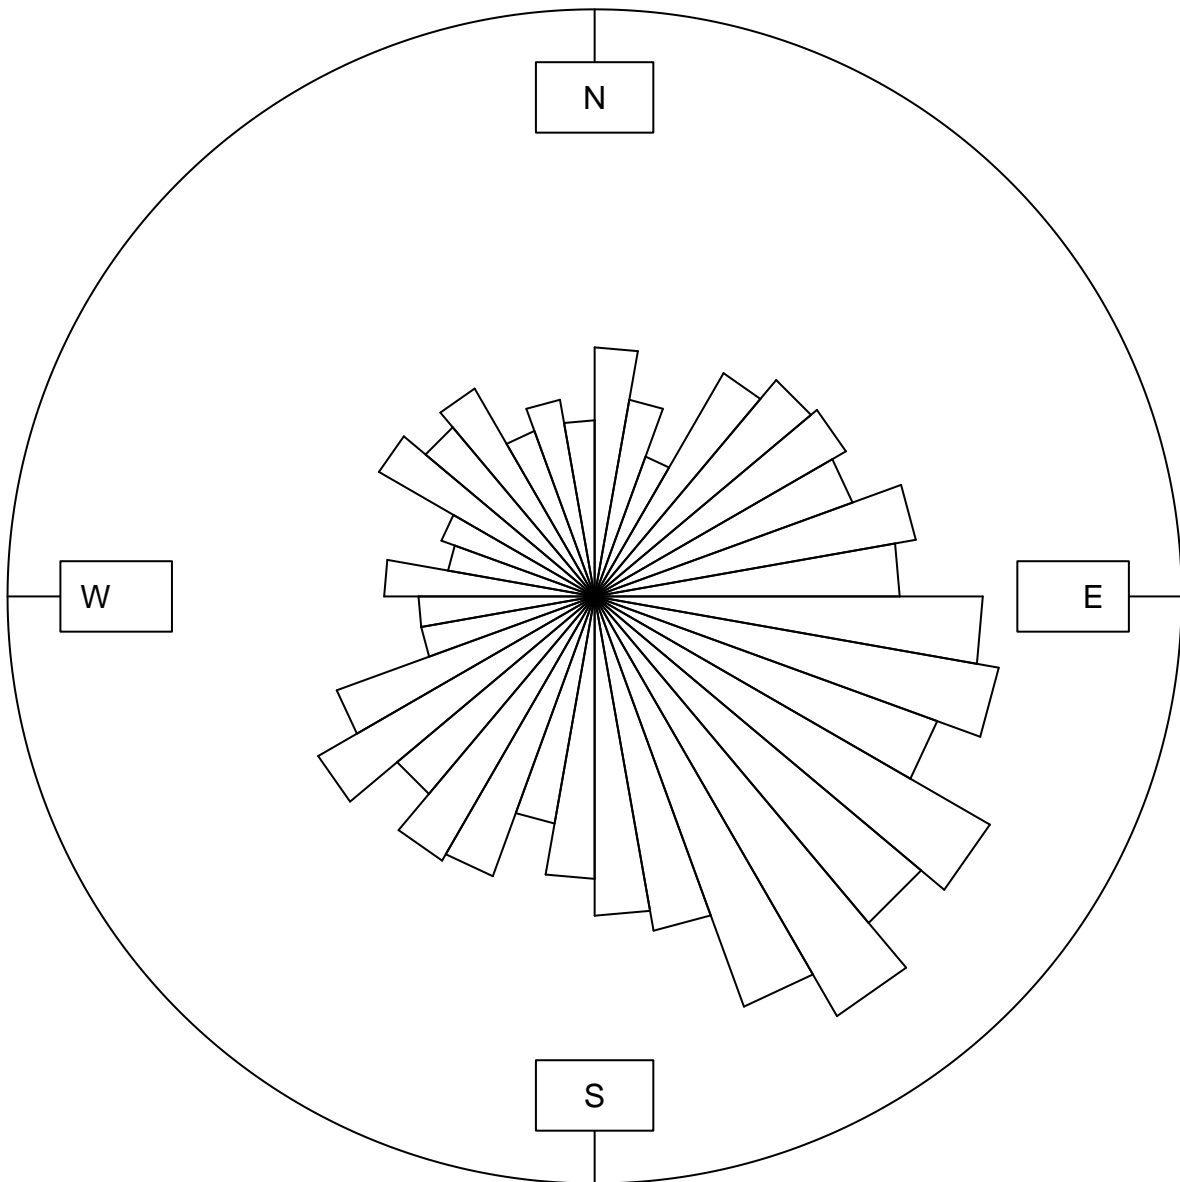

# bootstrap 330

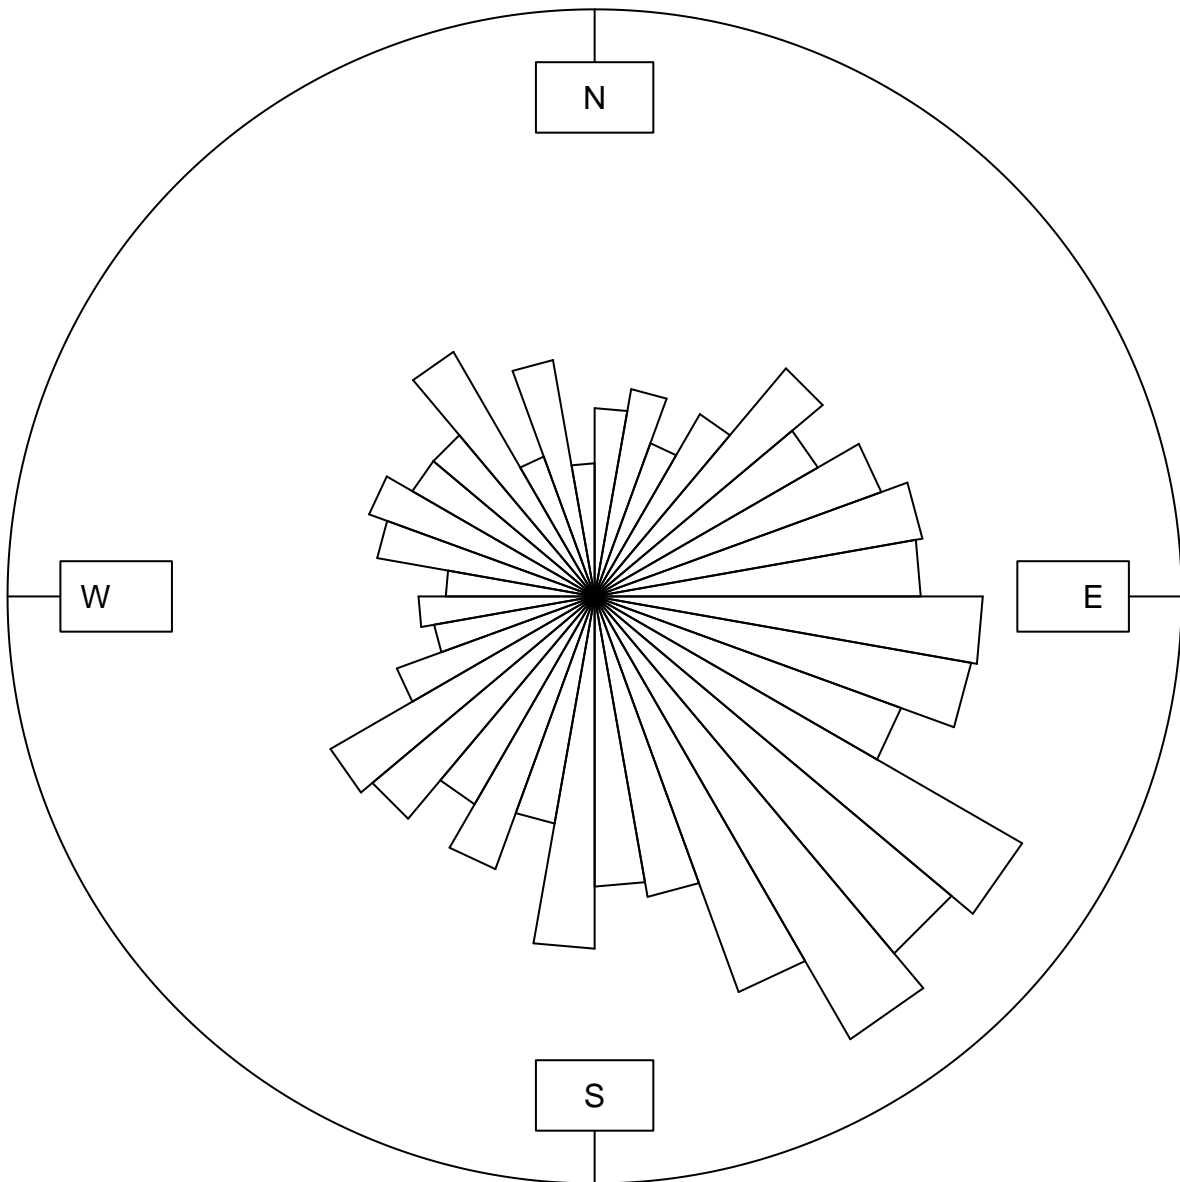

# bootstrap 331

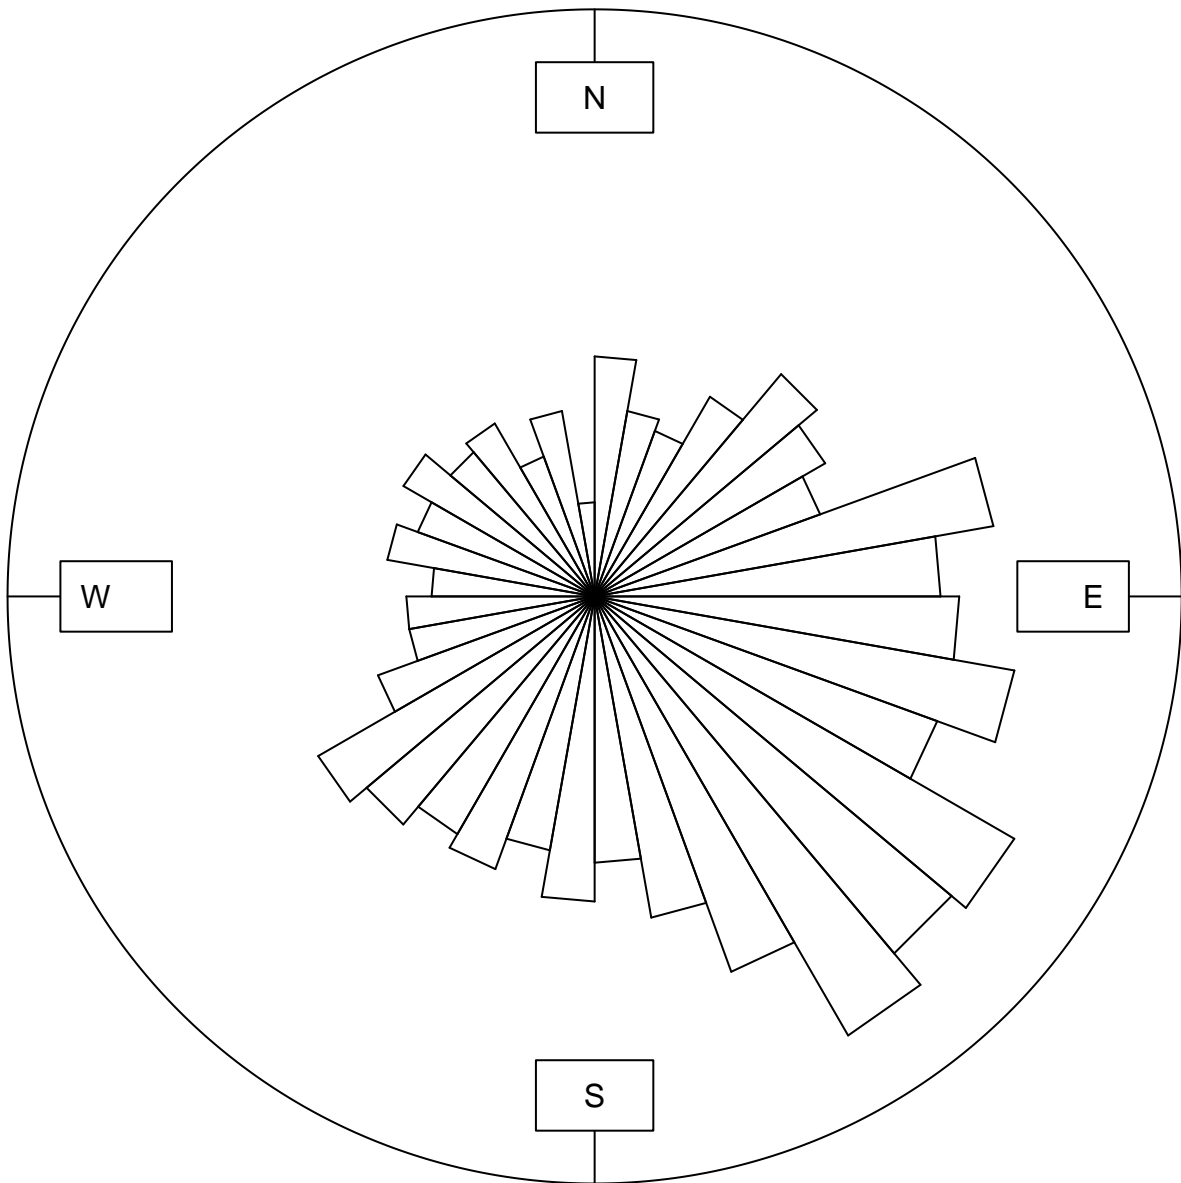

# bootstrap 332

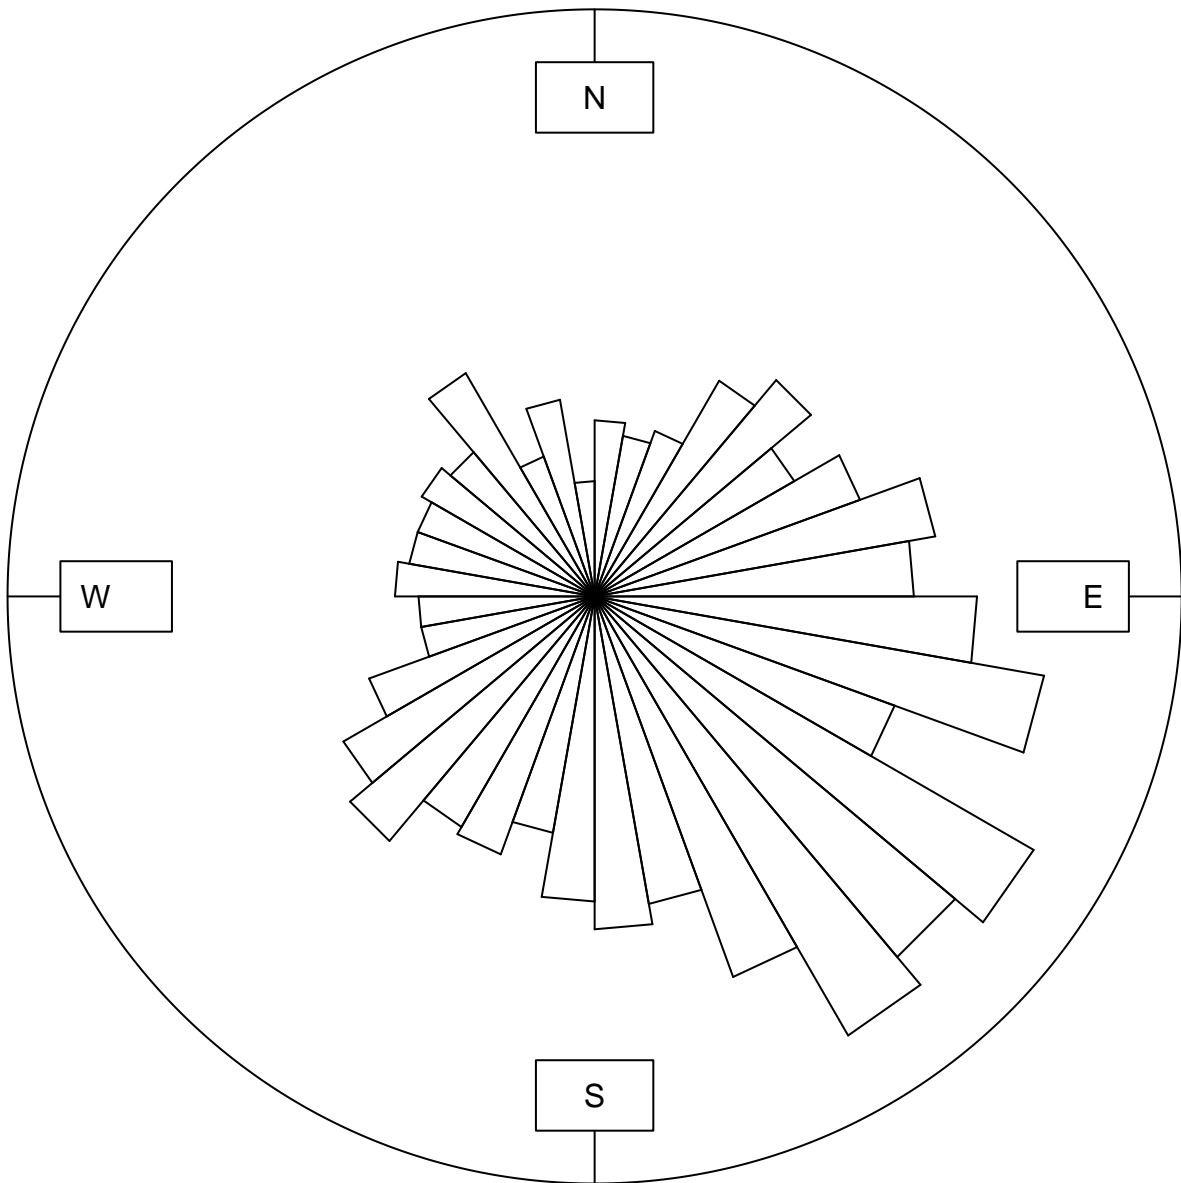

# bootstrap 333

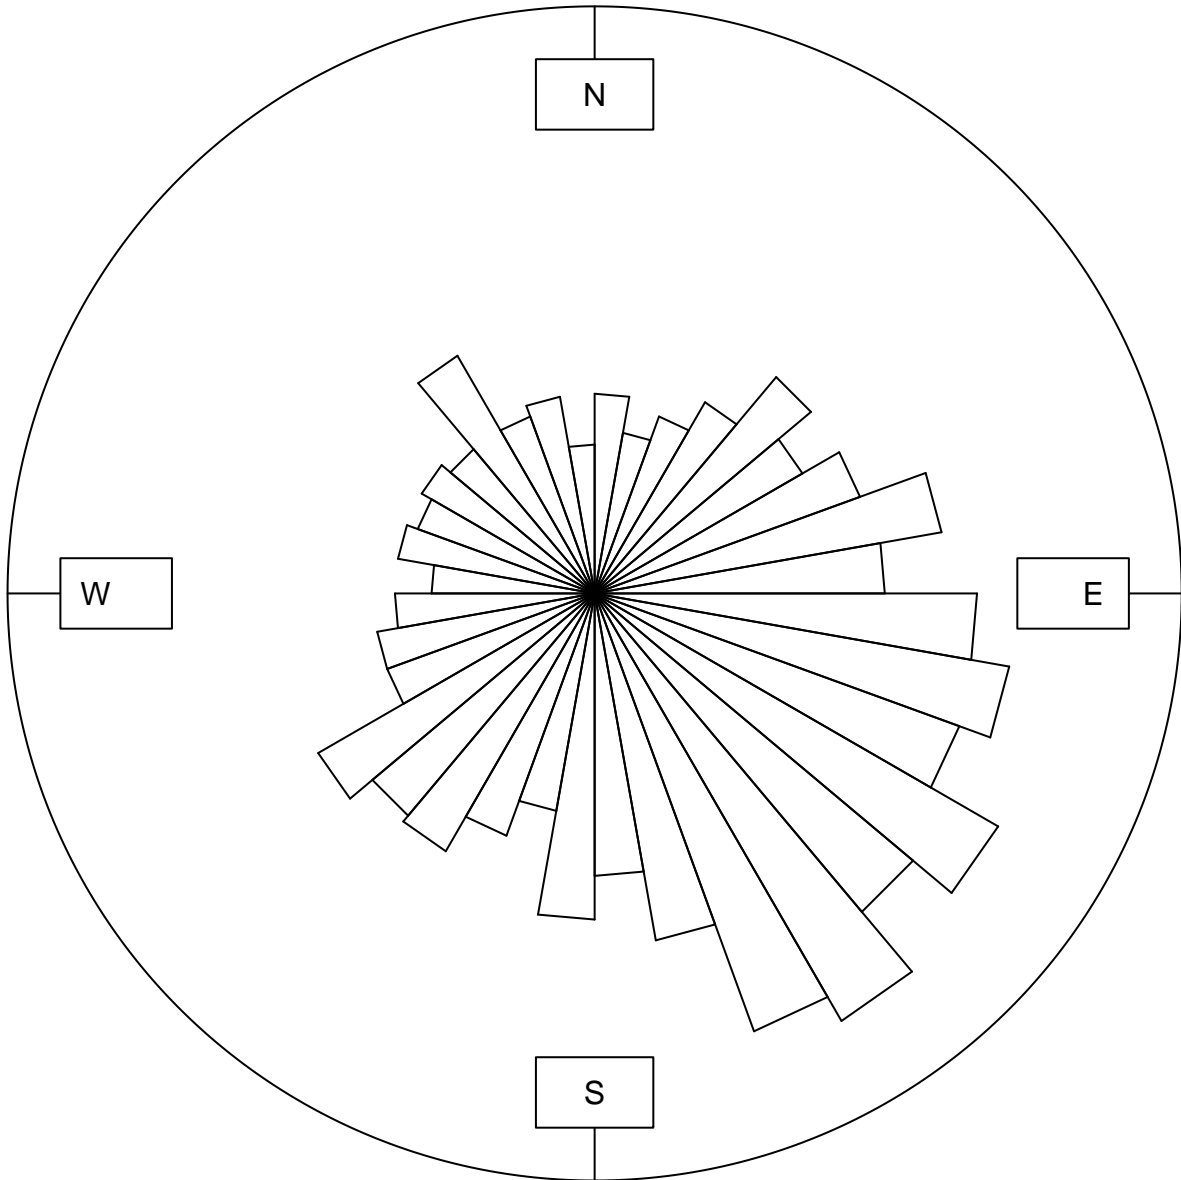

# bootstrap 334

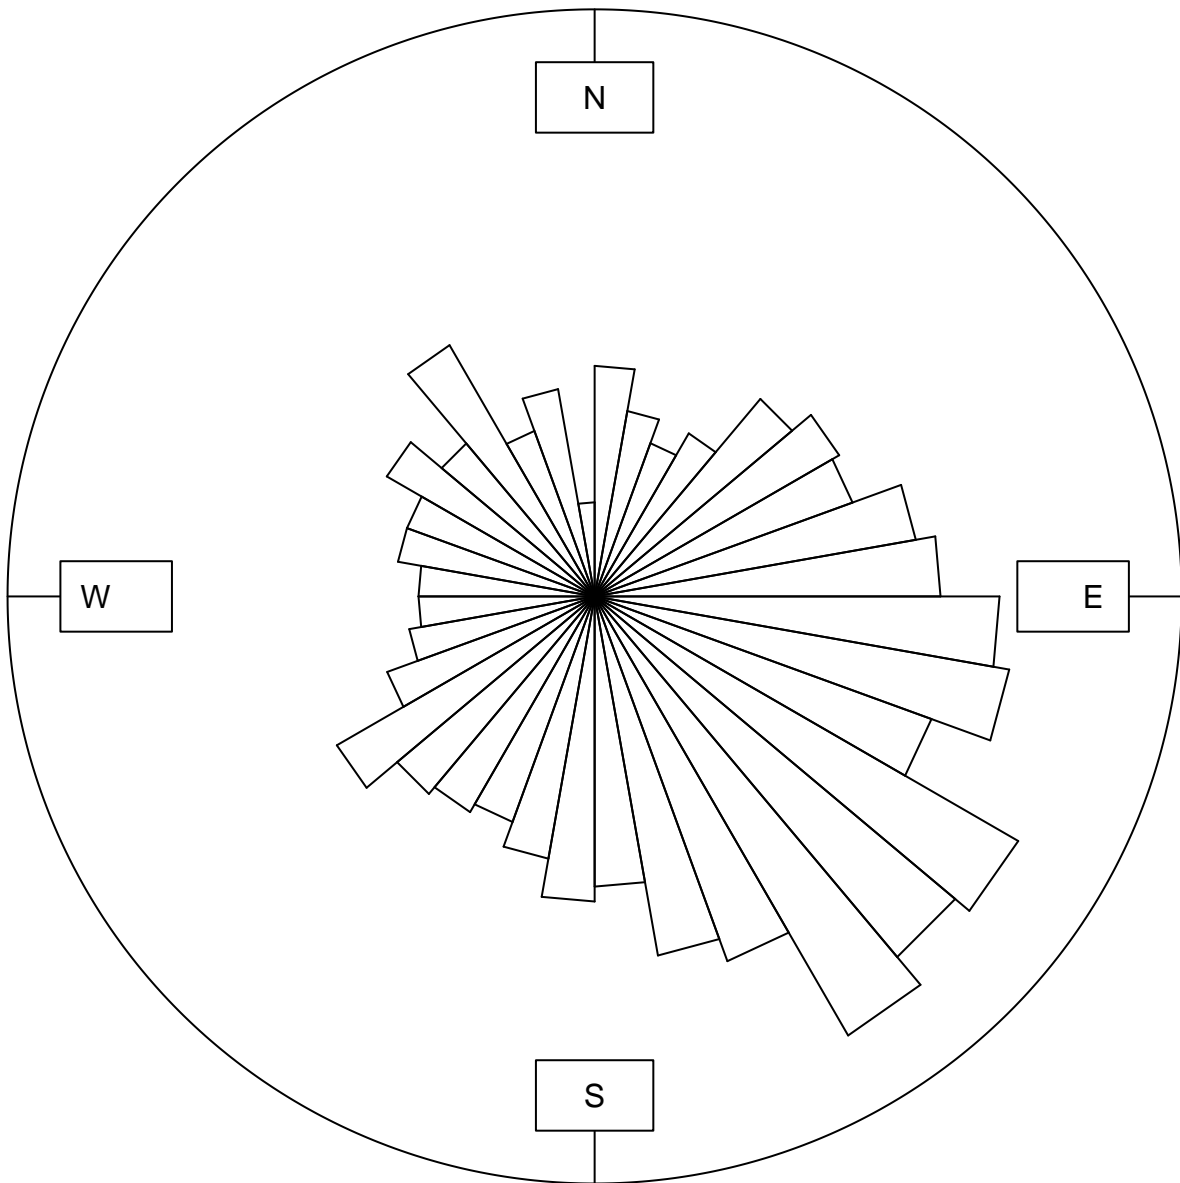

# bootstrap 335

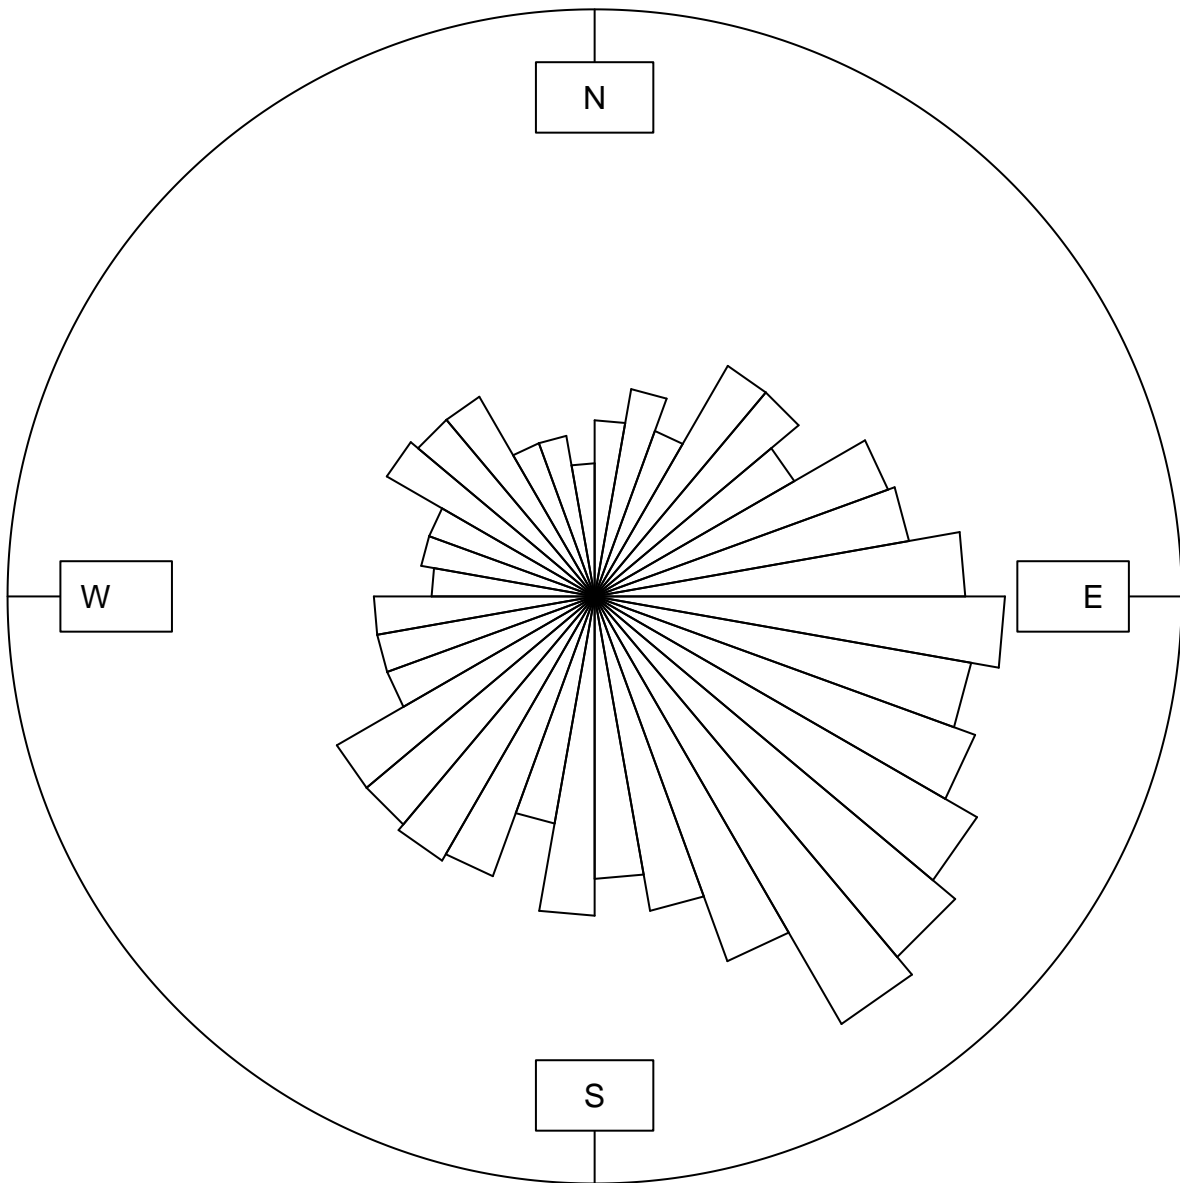

# bootstrap 336

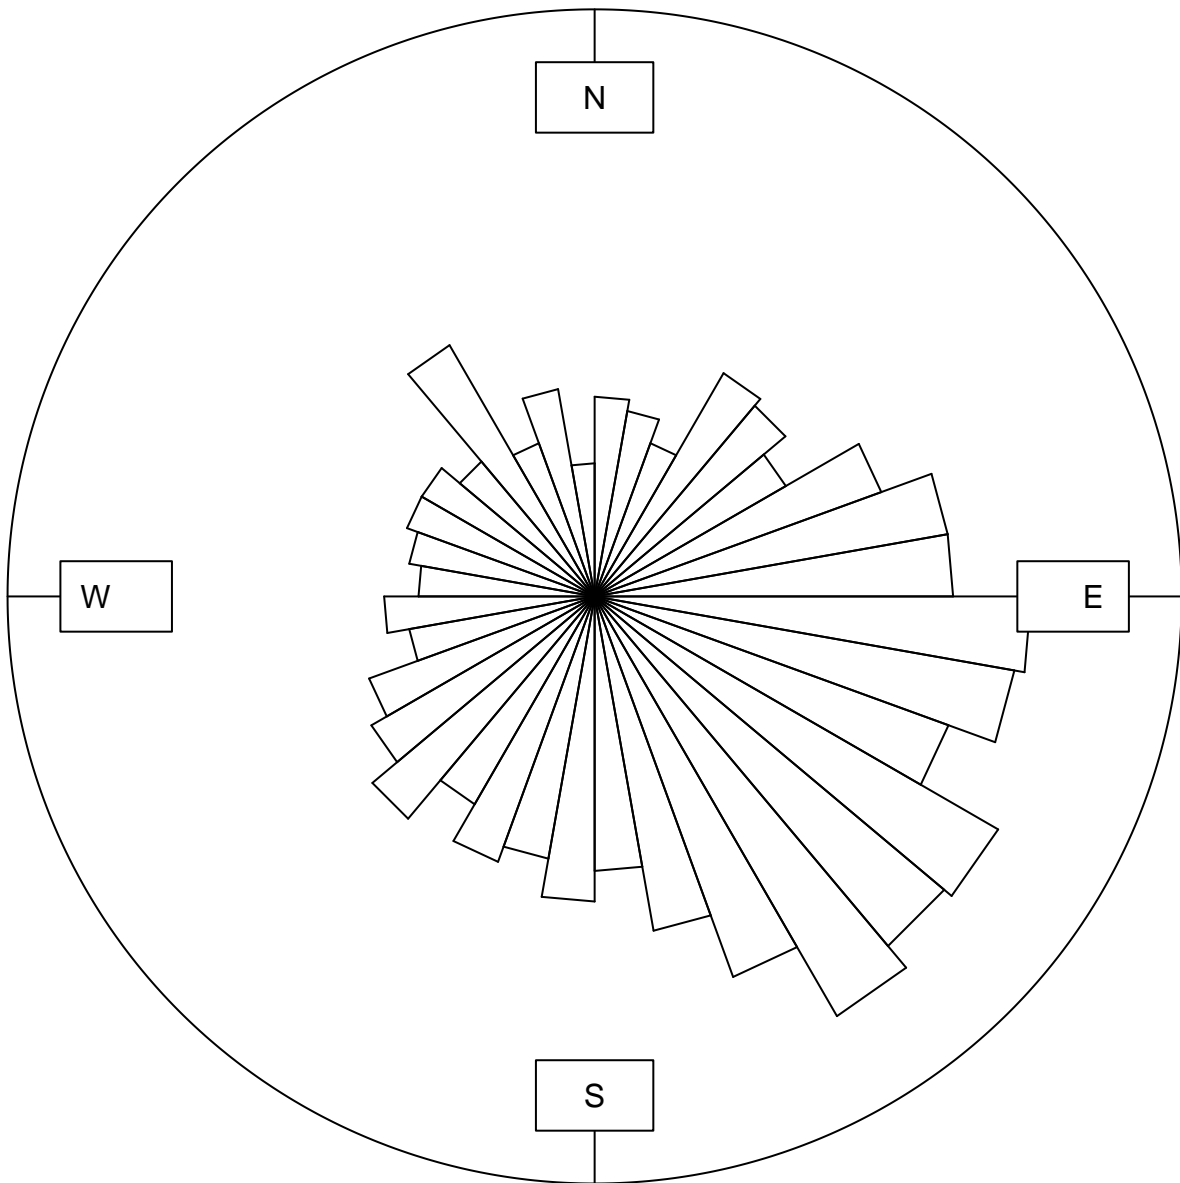



# bootstrap 337

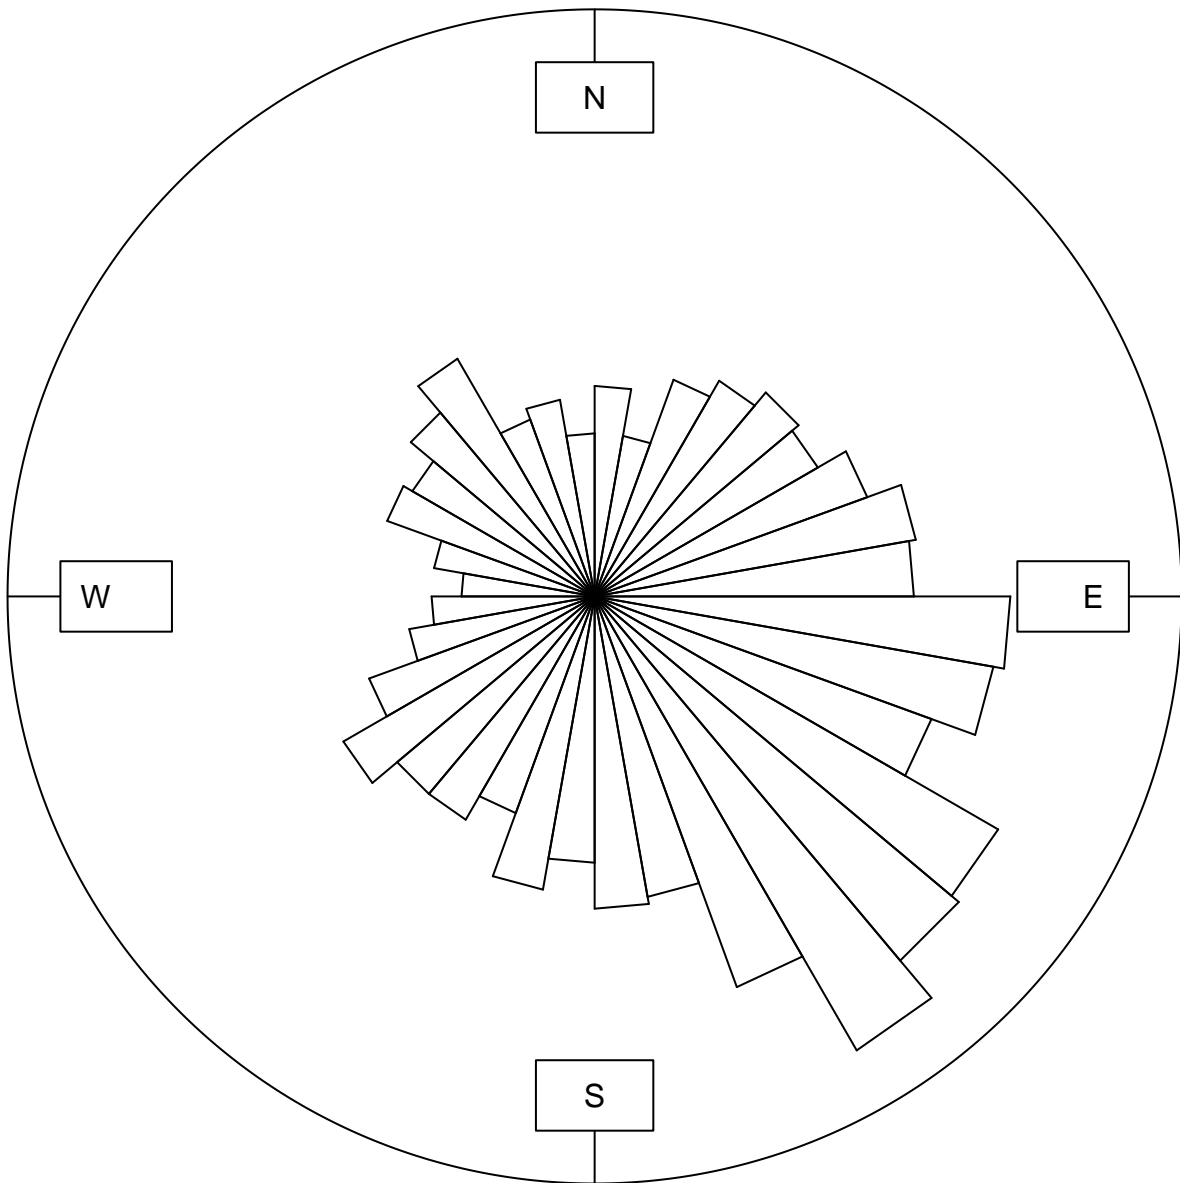

# bootstrap 338

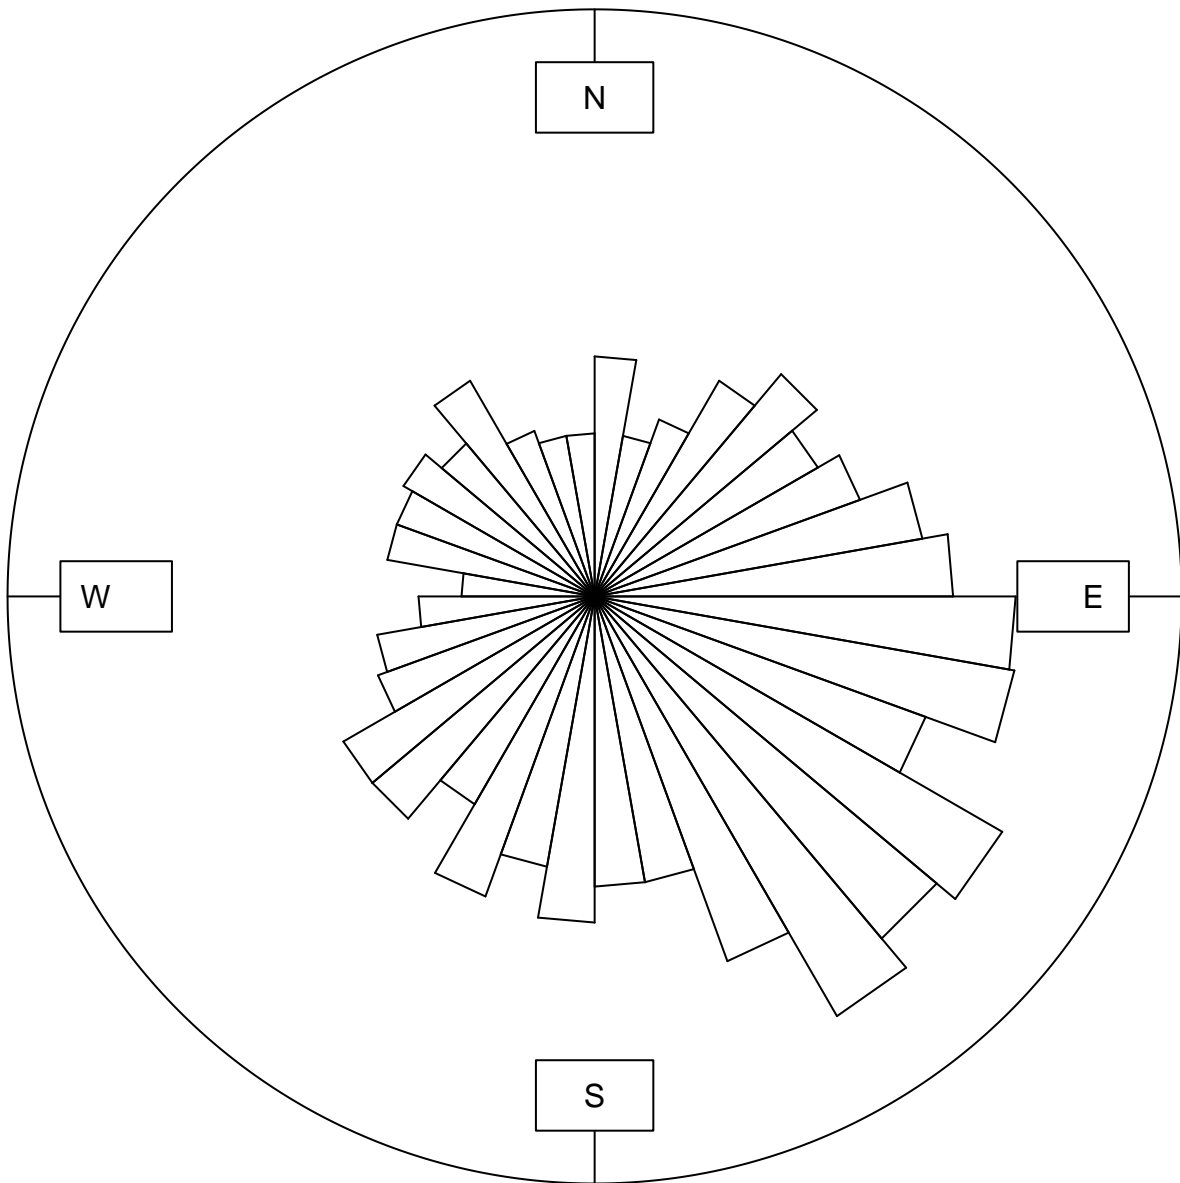

# bootstrap 339

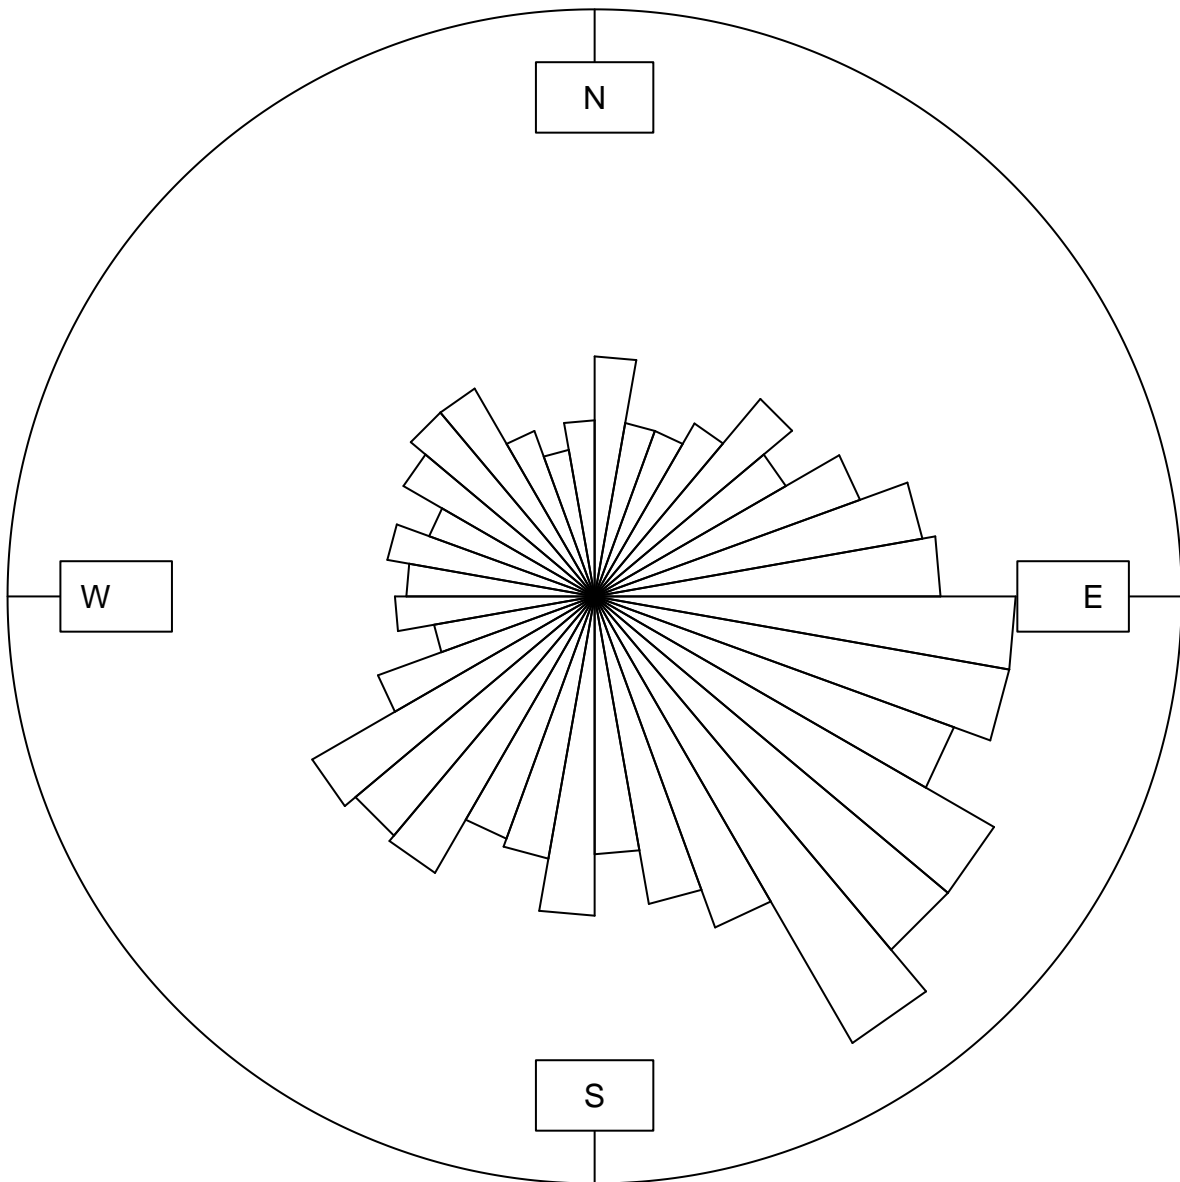

# bootstrap 340

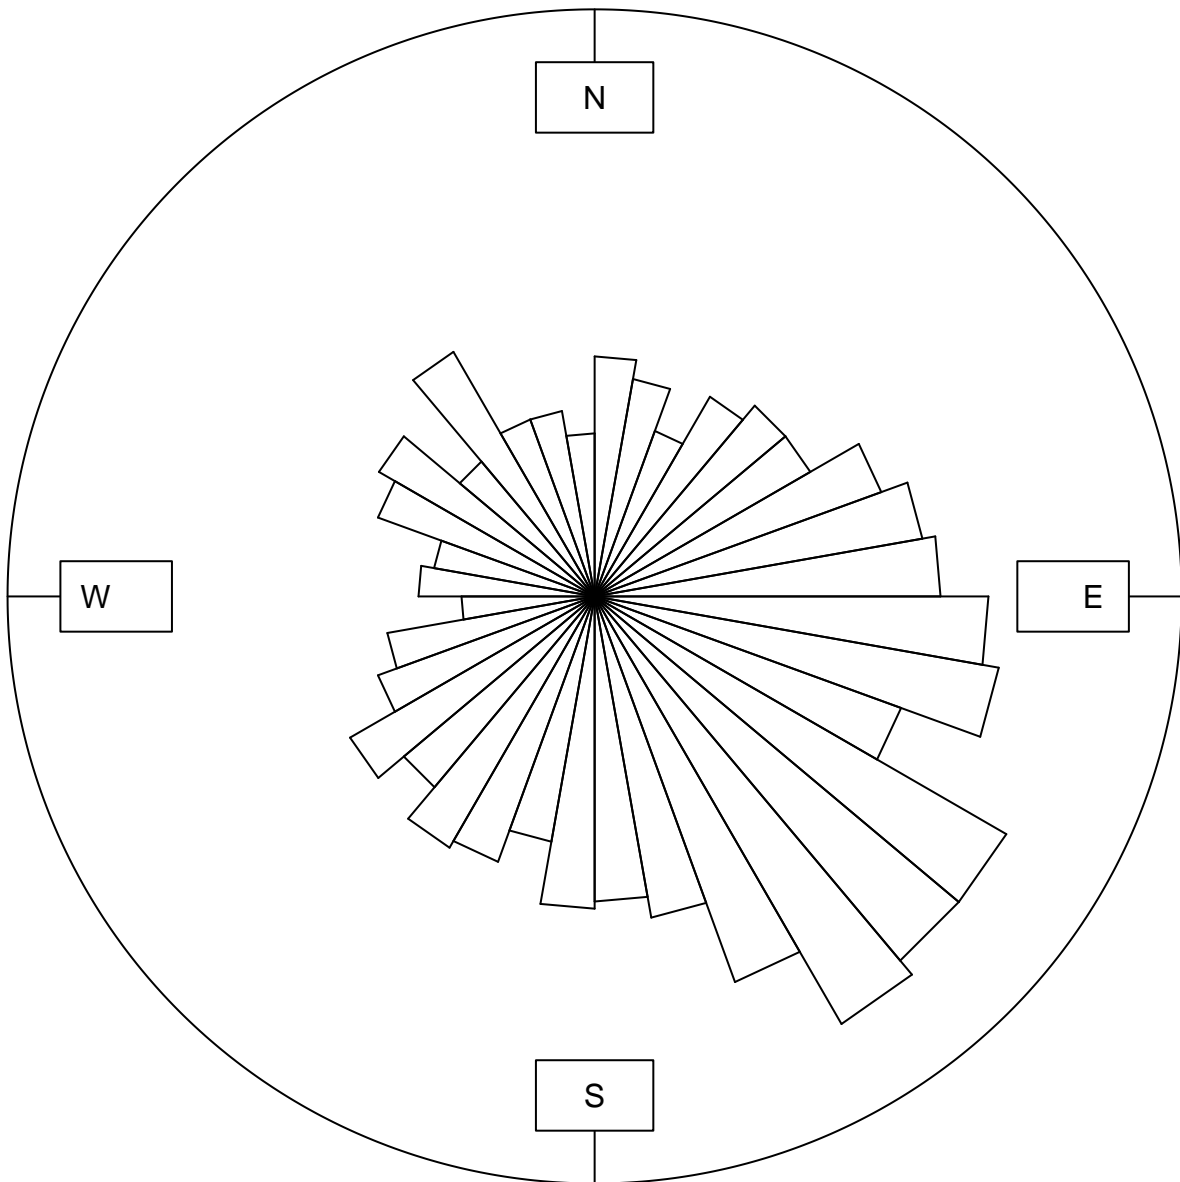

# bootstrap 341

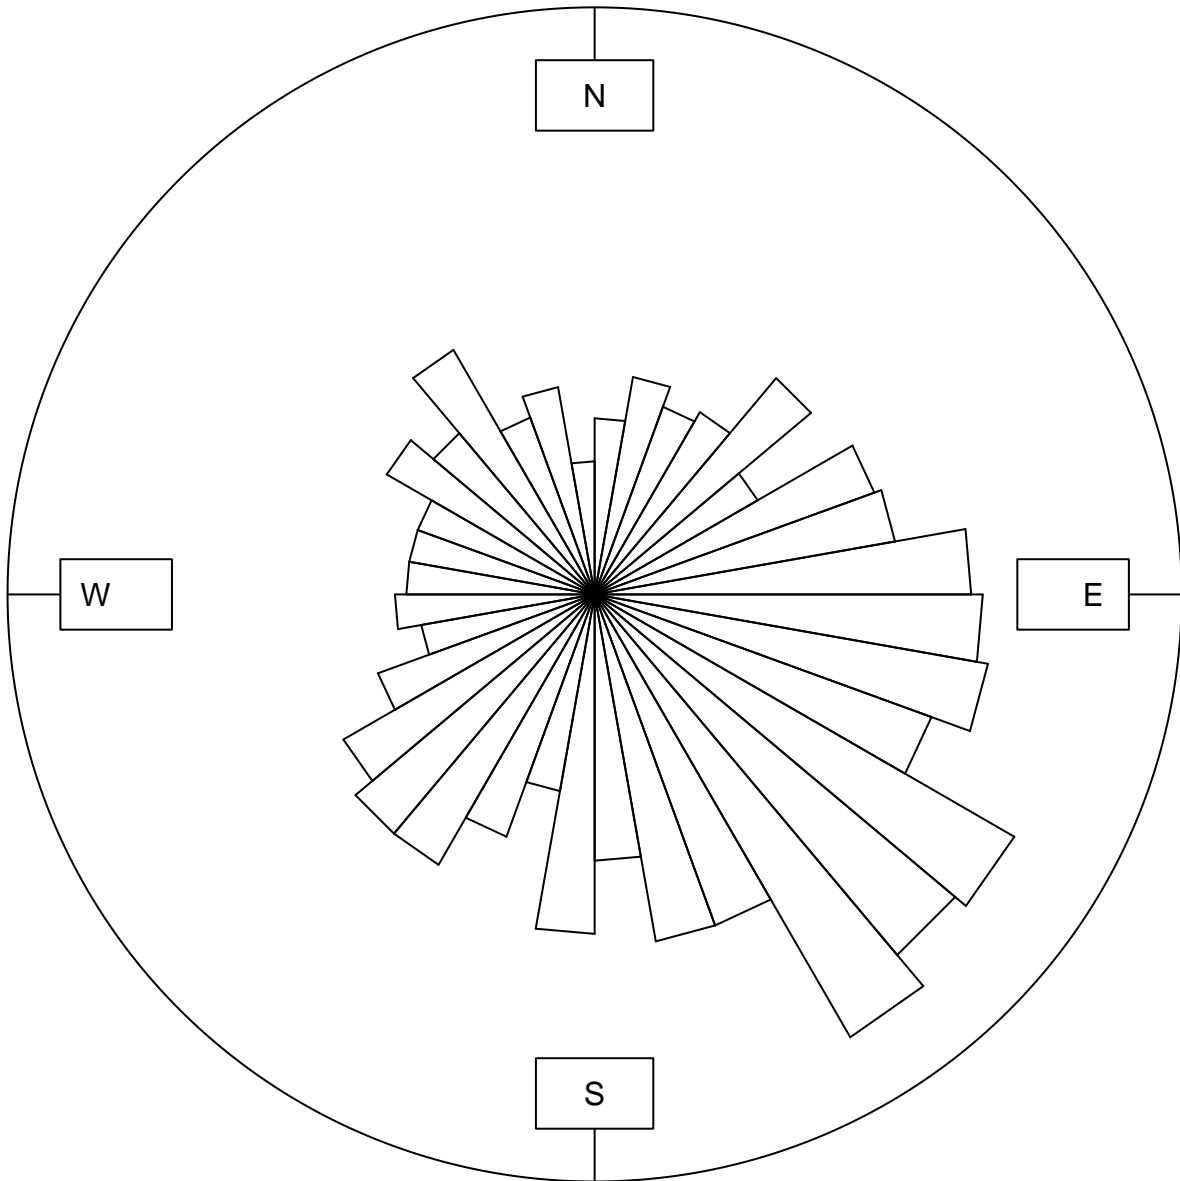

# bootstrap 342

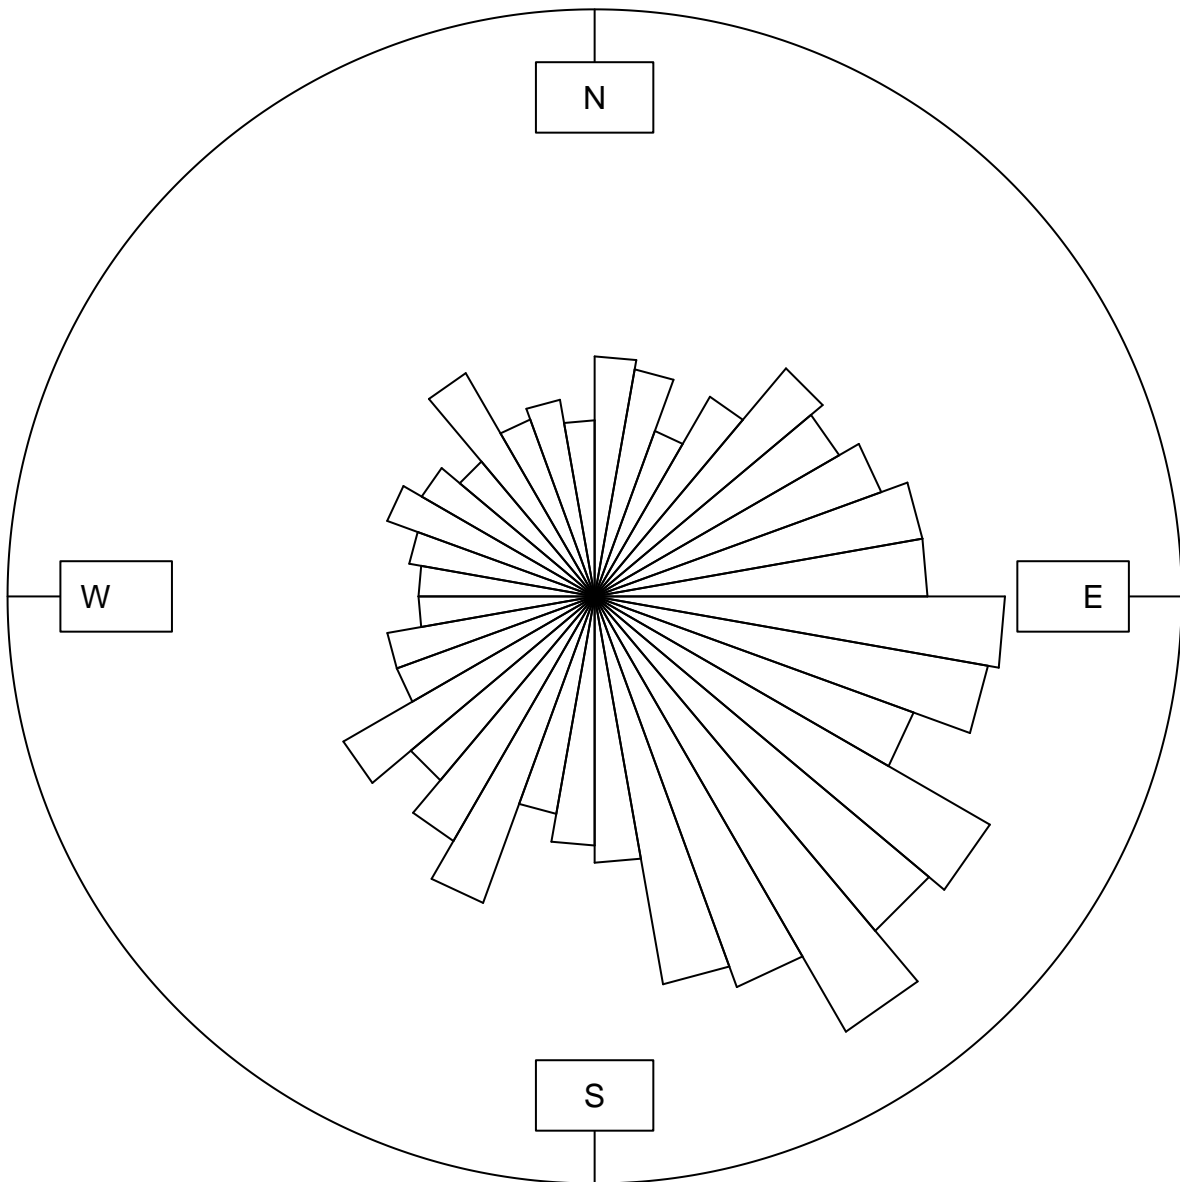

# bootstrap 343

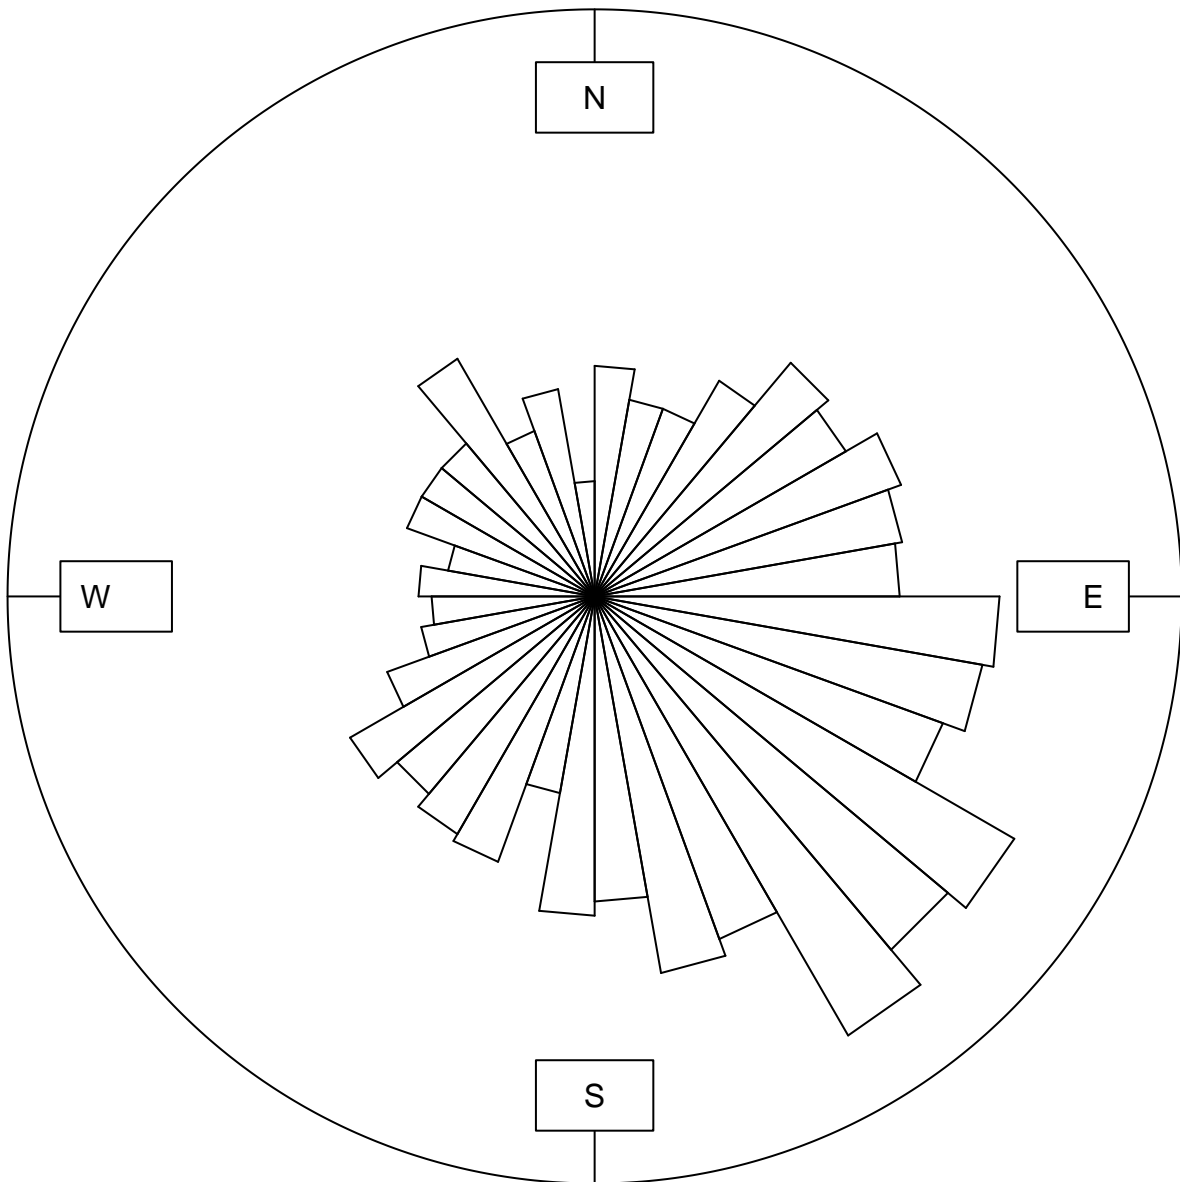

# bootstrap 344

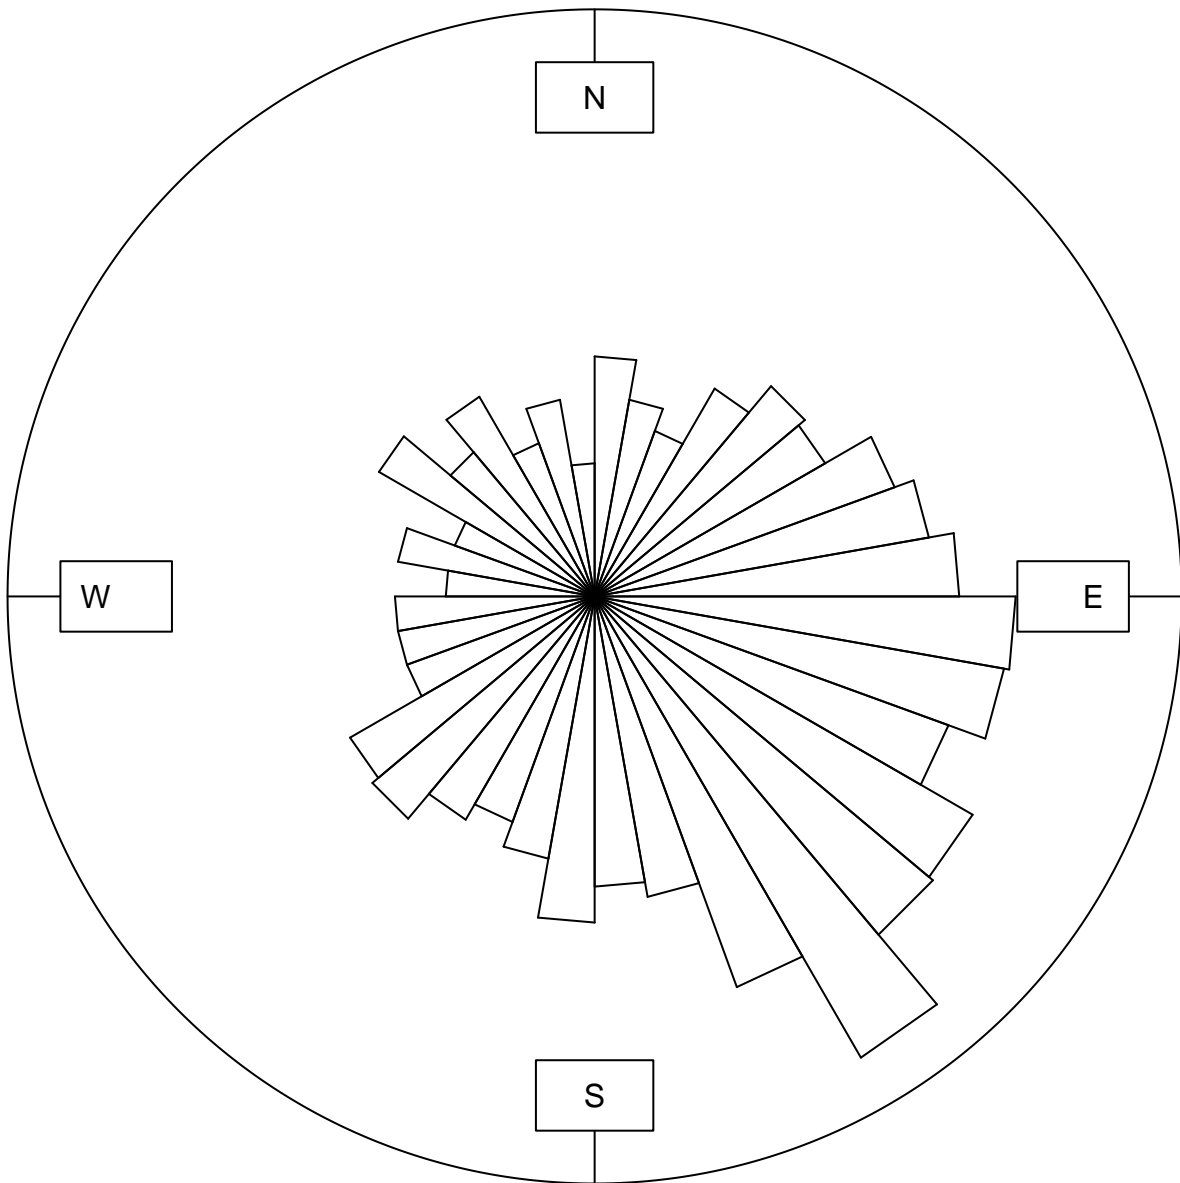



# bootstrap 345

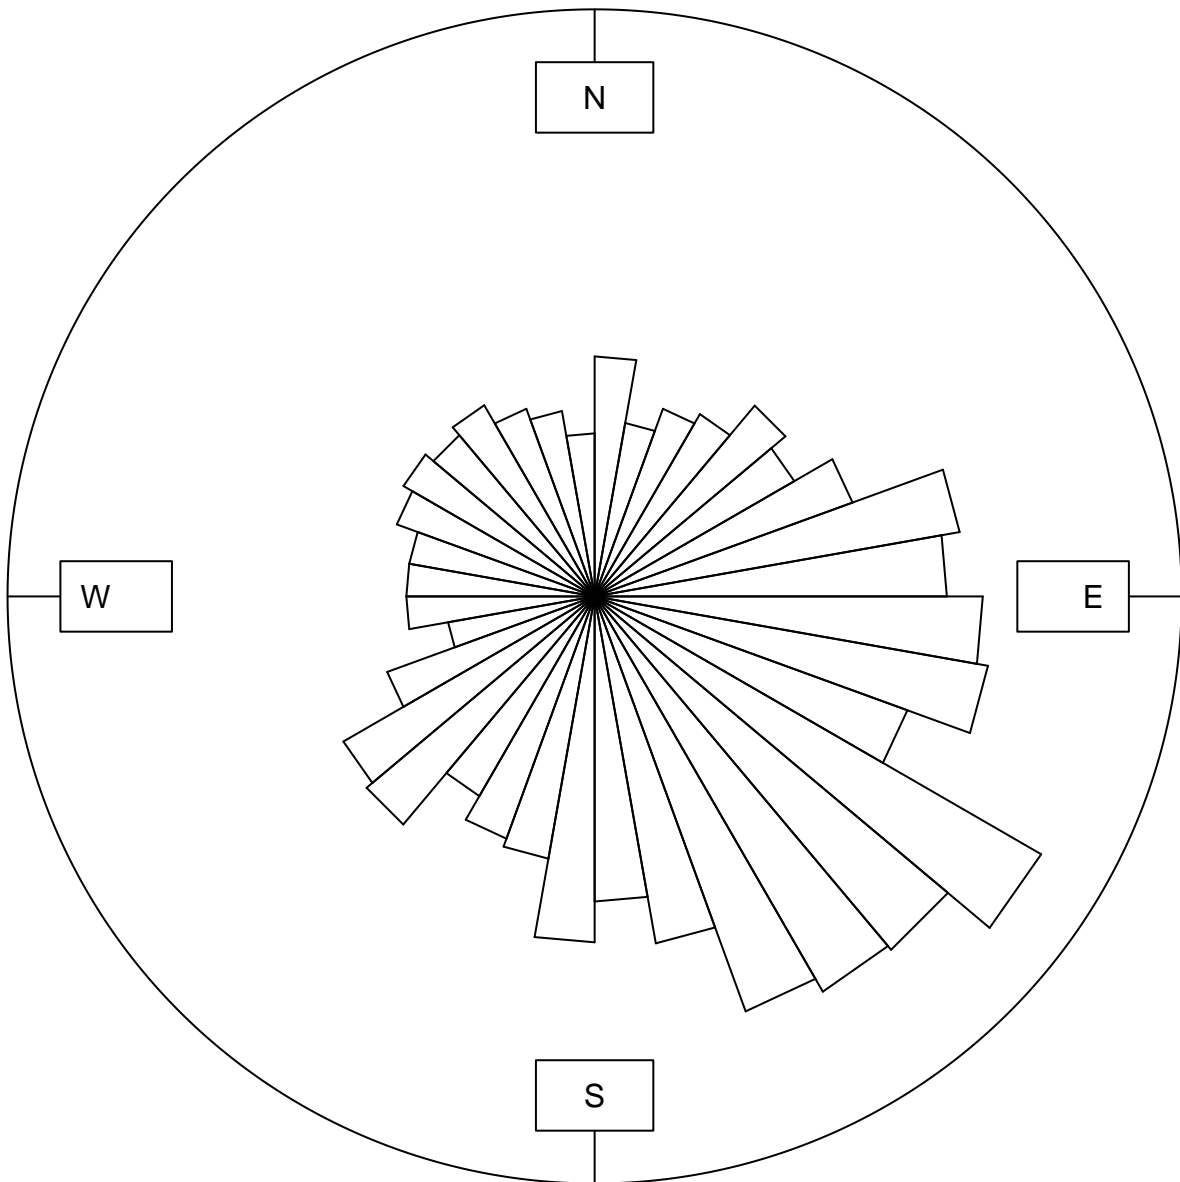

# bootstrap 346

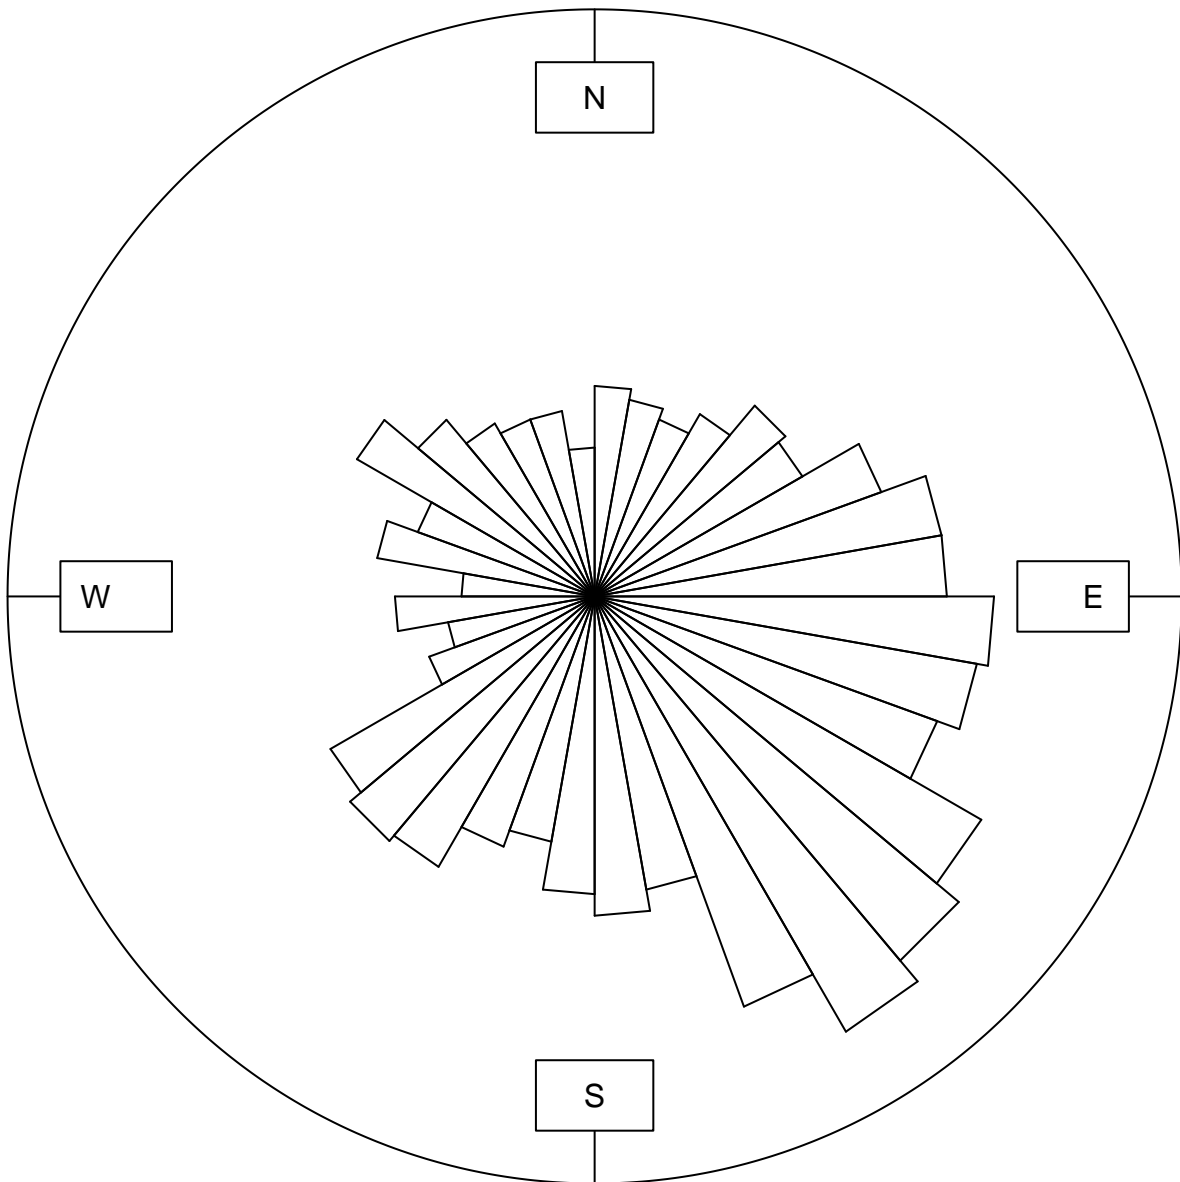

# bootstrap 347

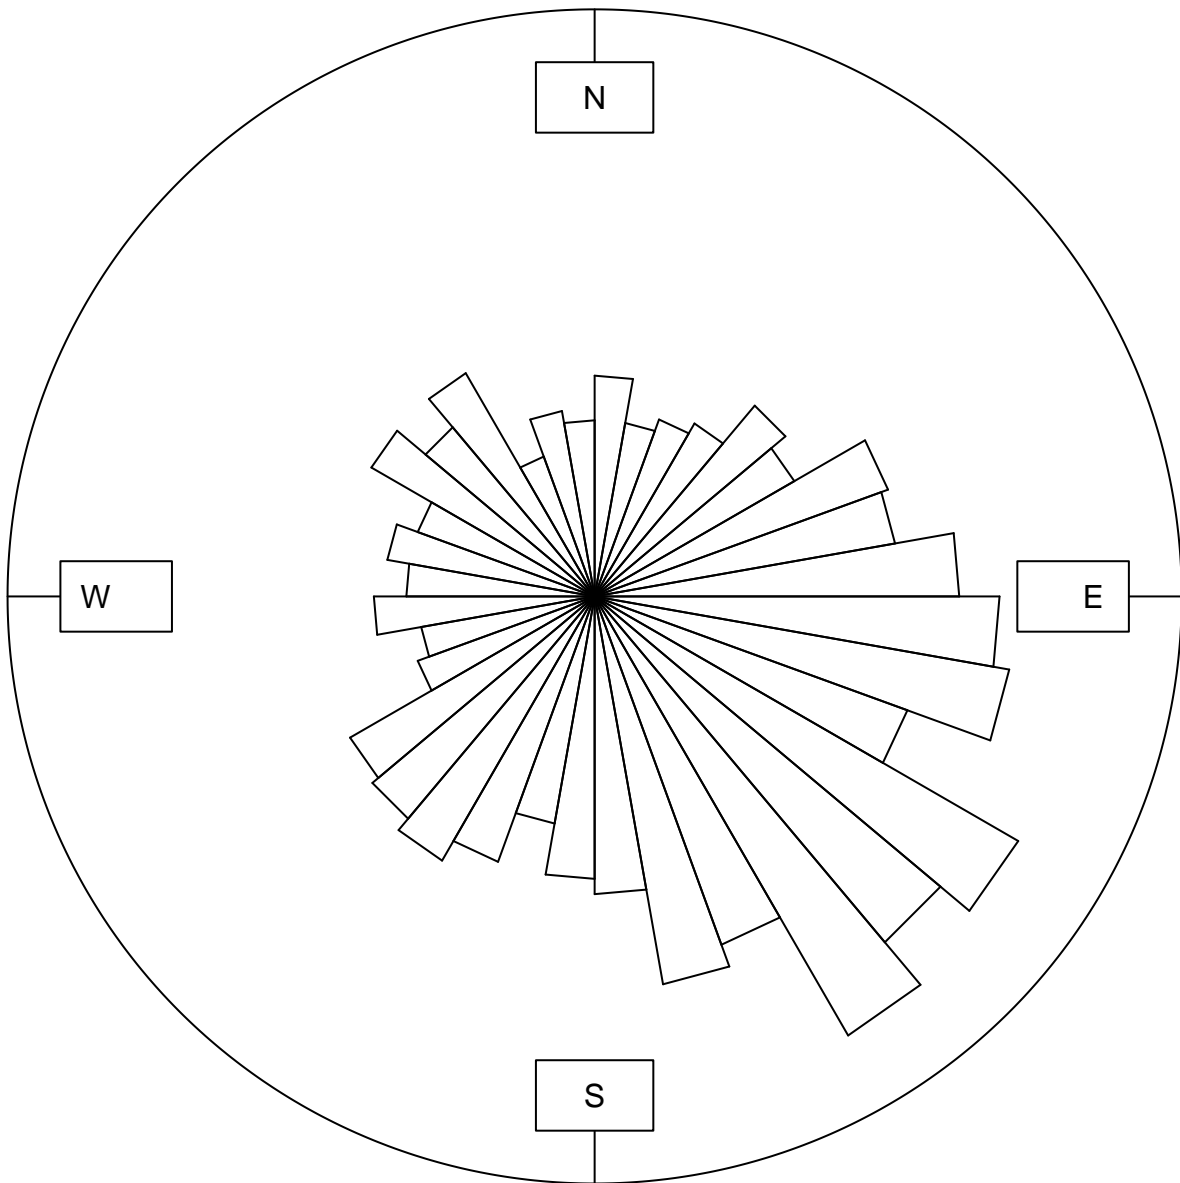

# bootstrap 348

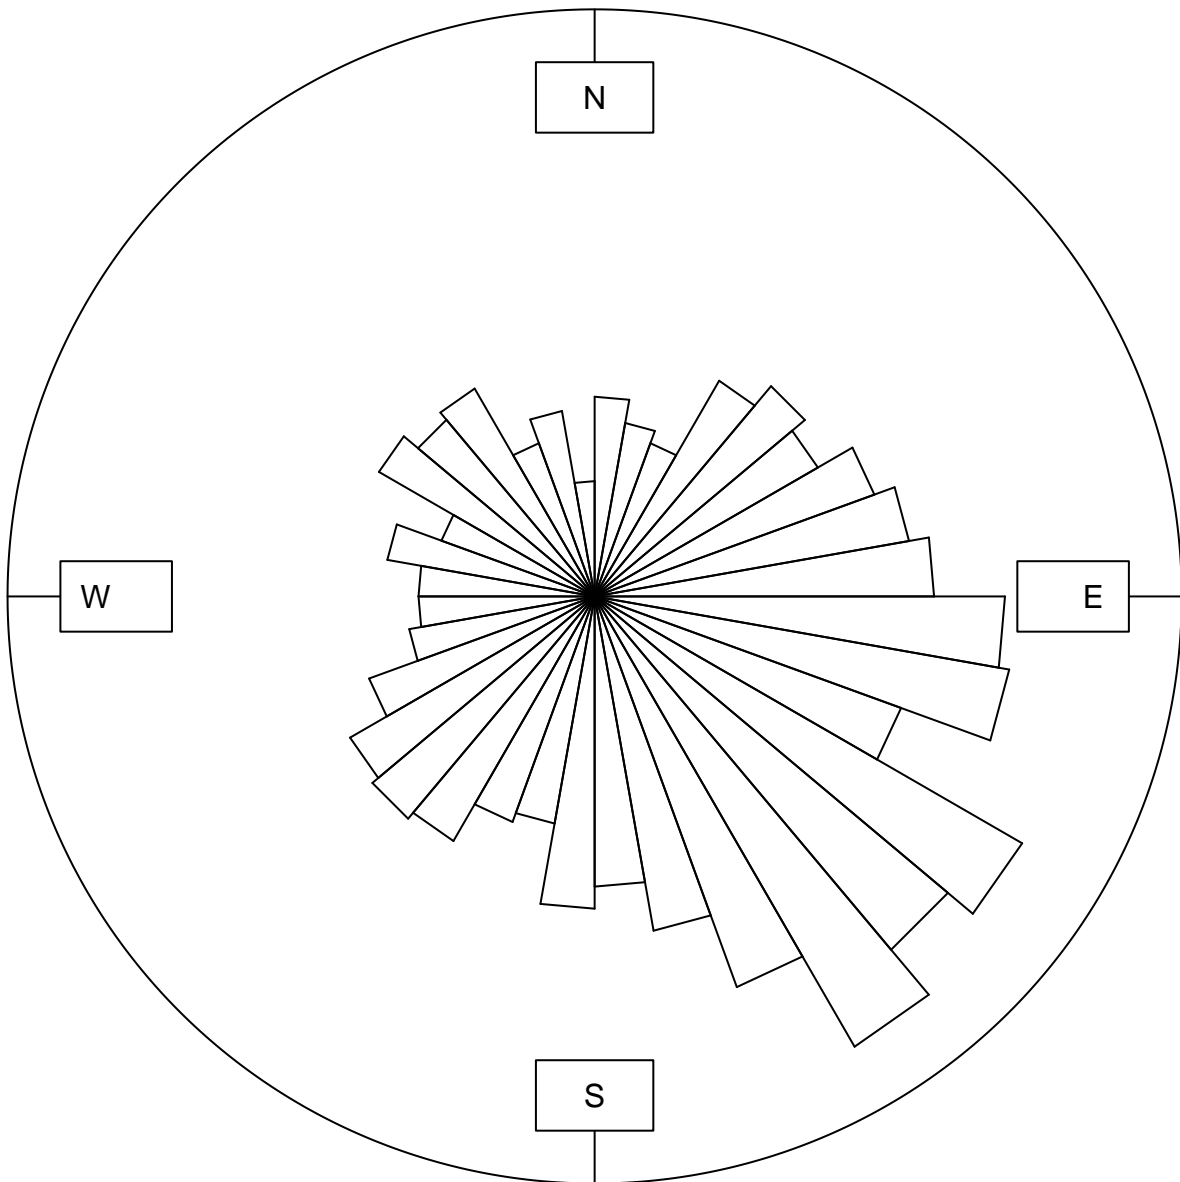

# bootstrap 349

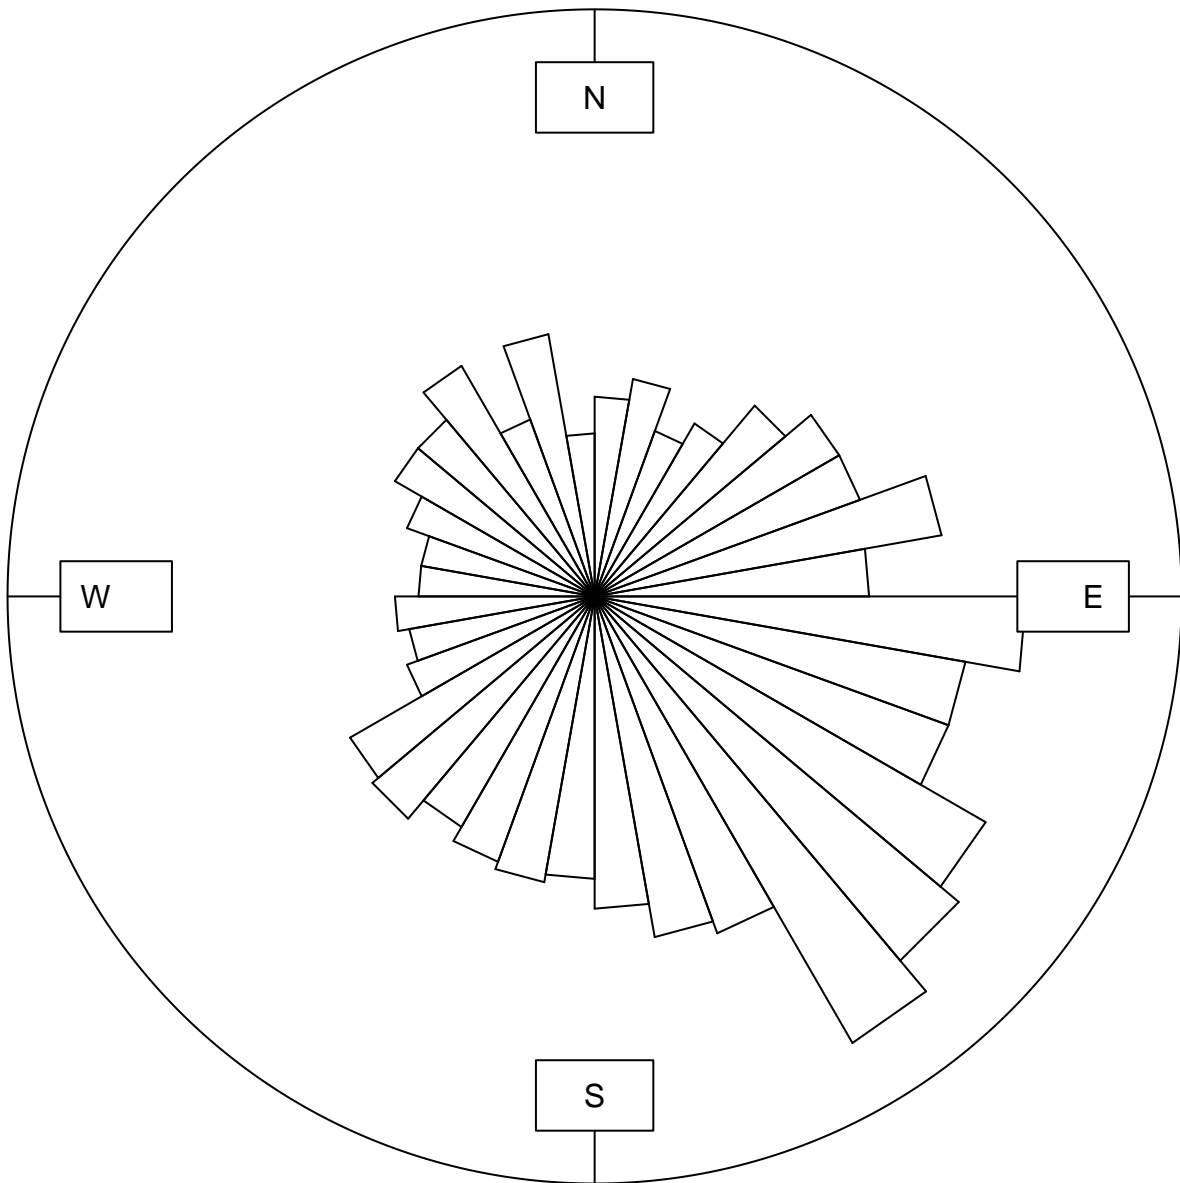

# bootstrap 350

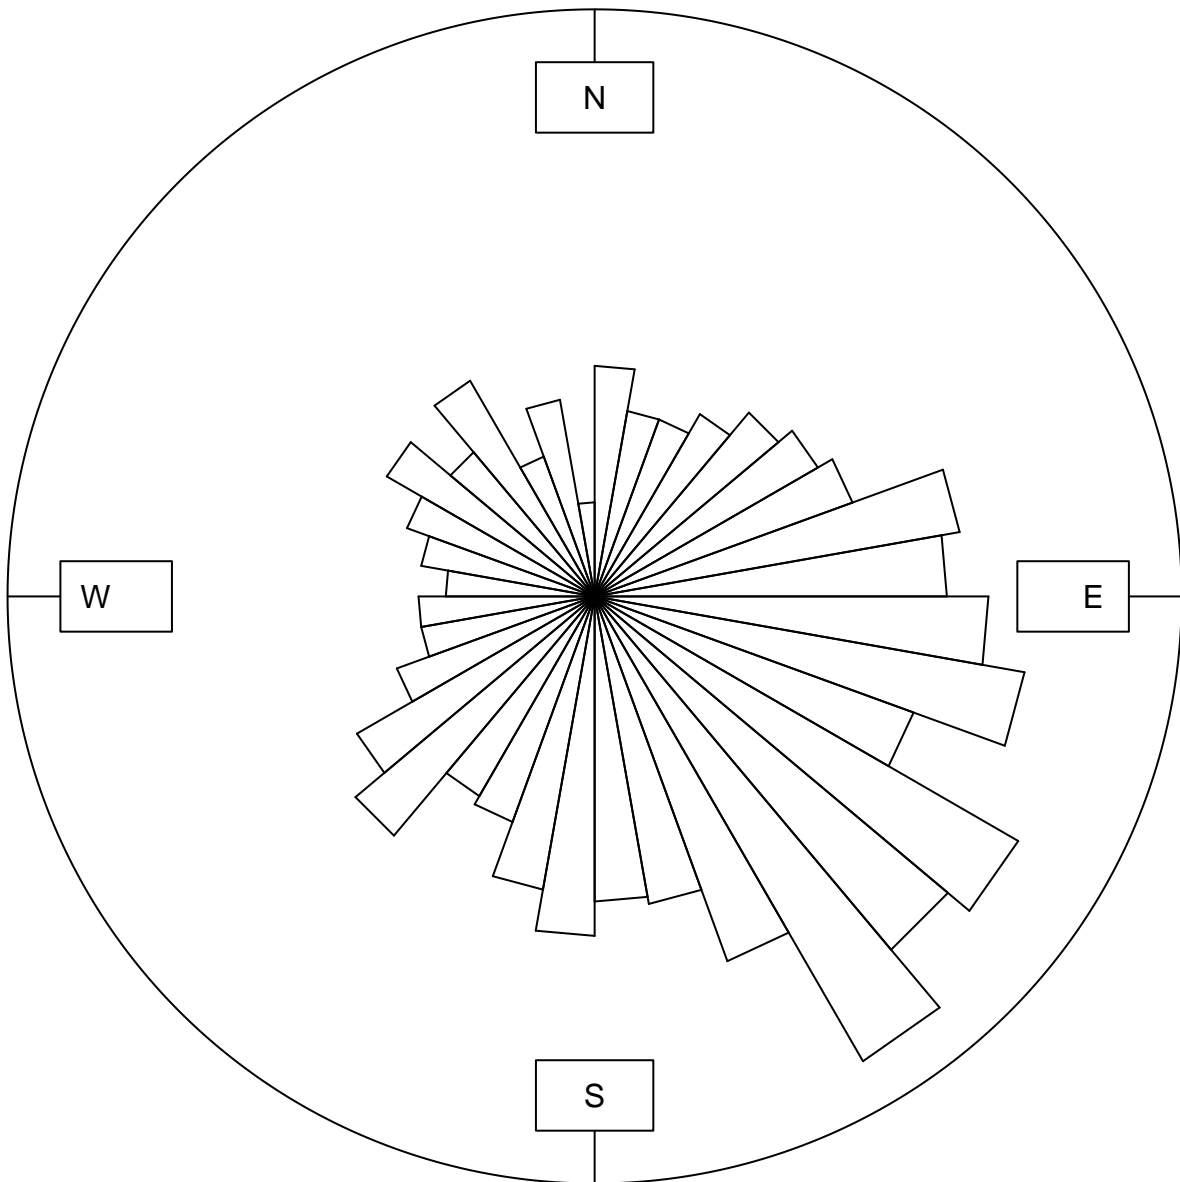

# bootstrap 351

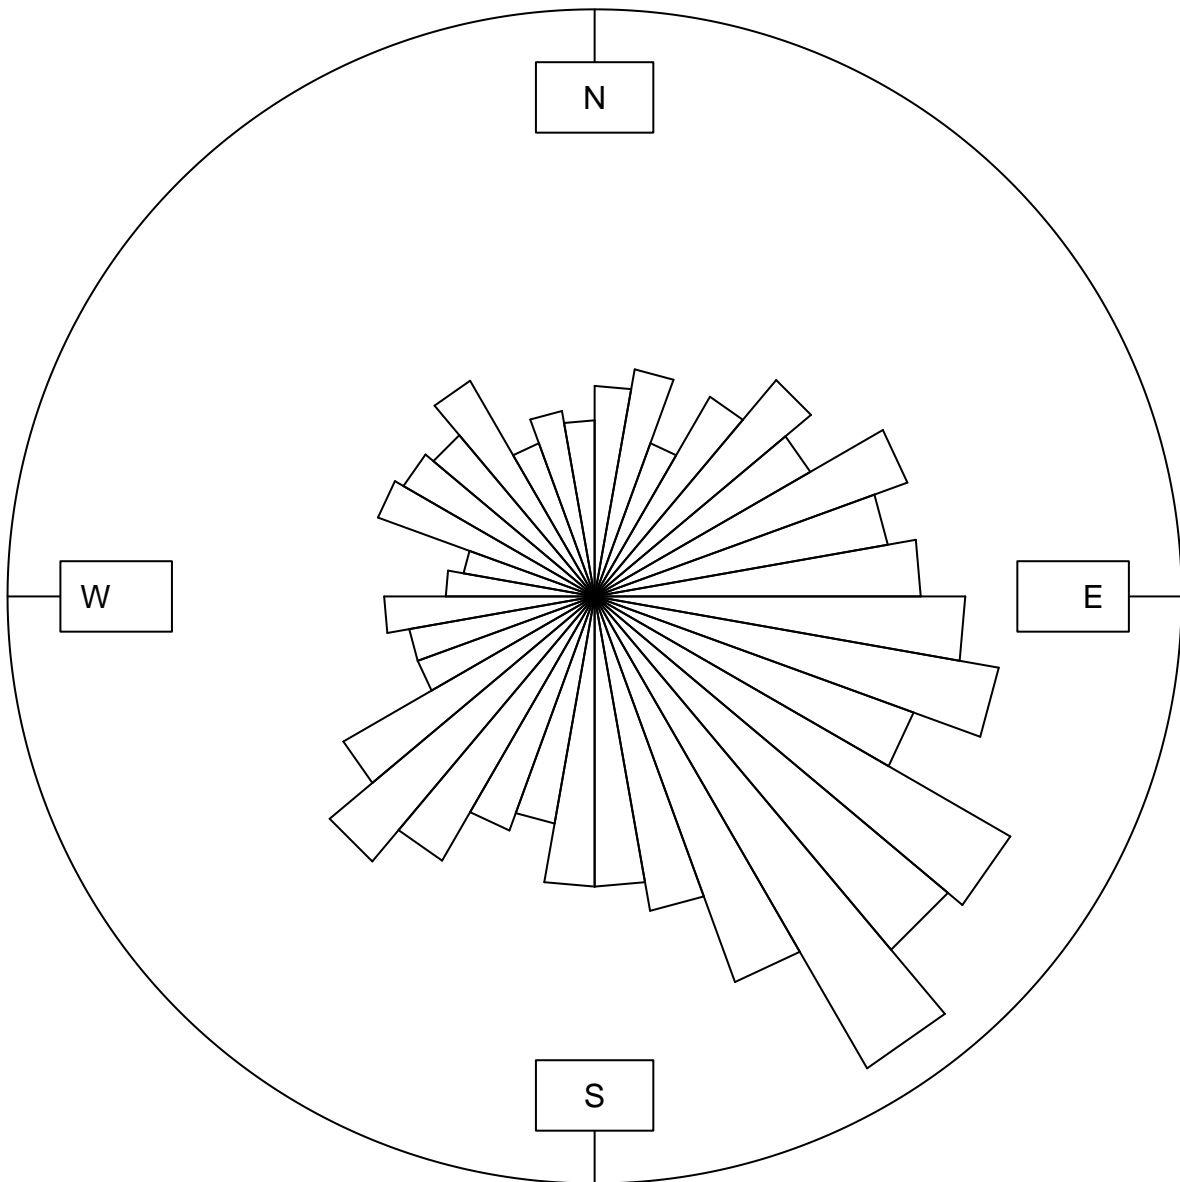

# bootstrap 352

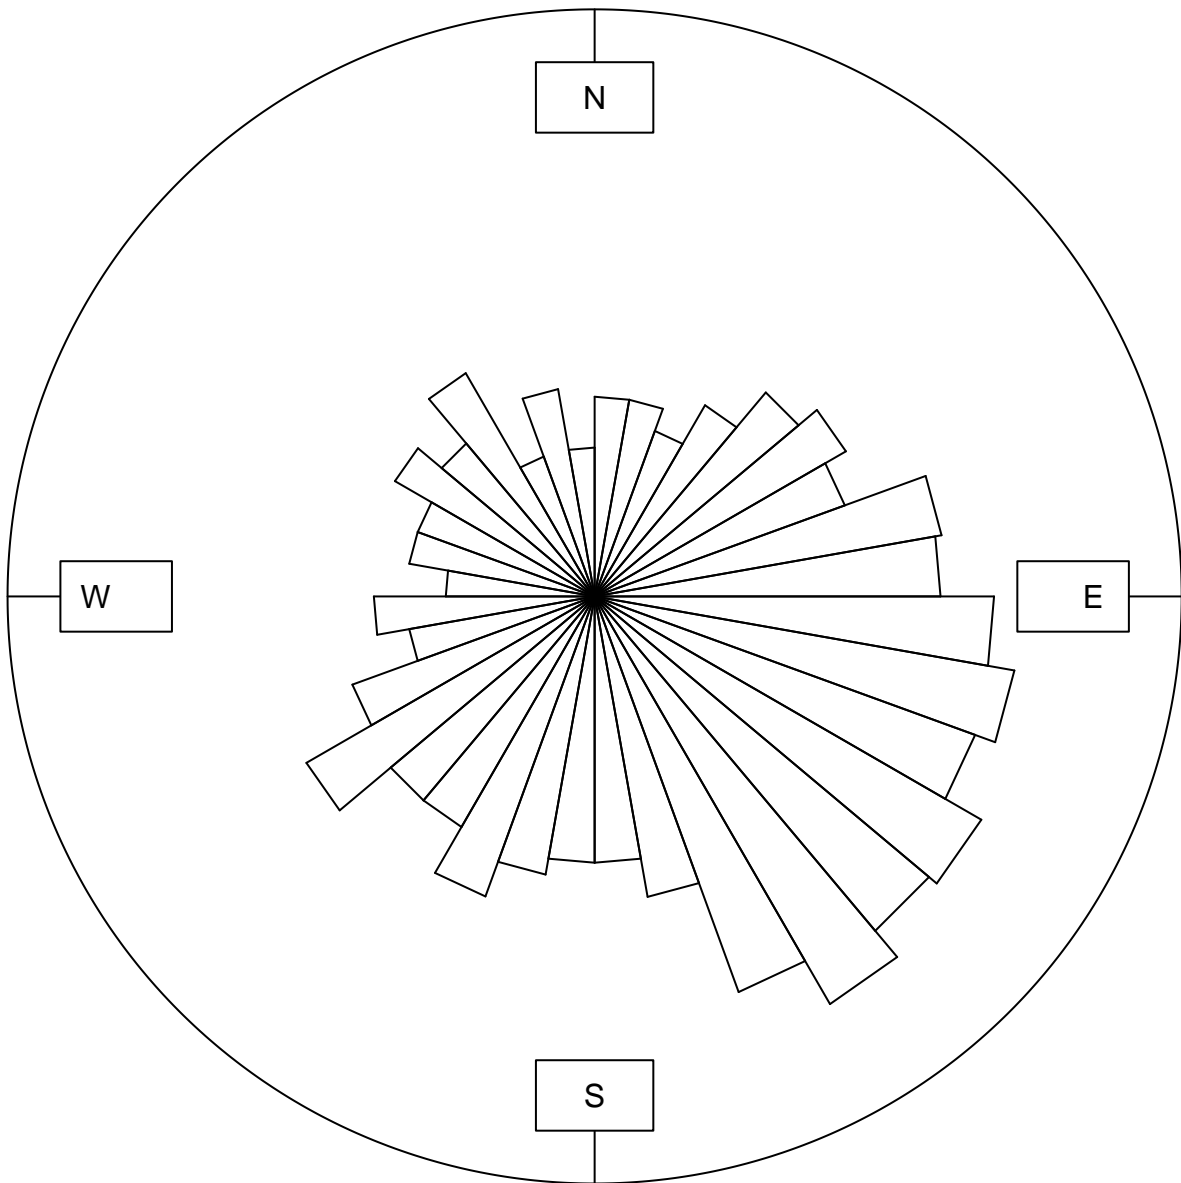



# bootstrap 353

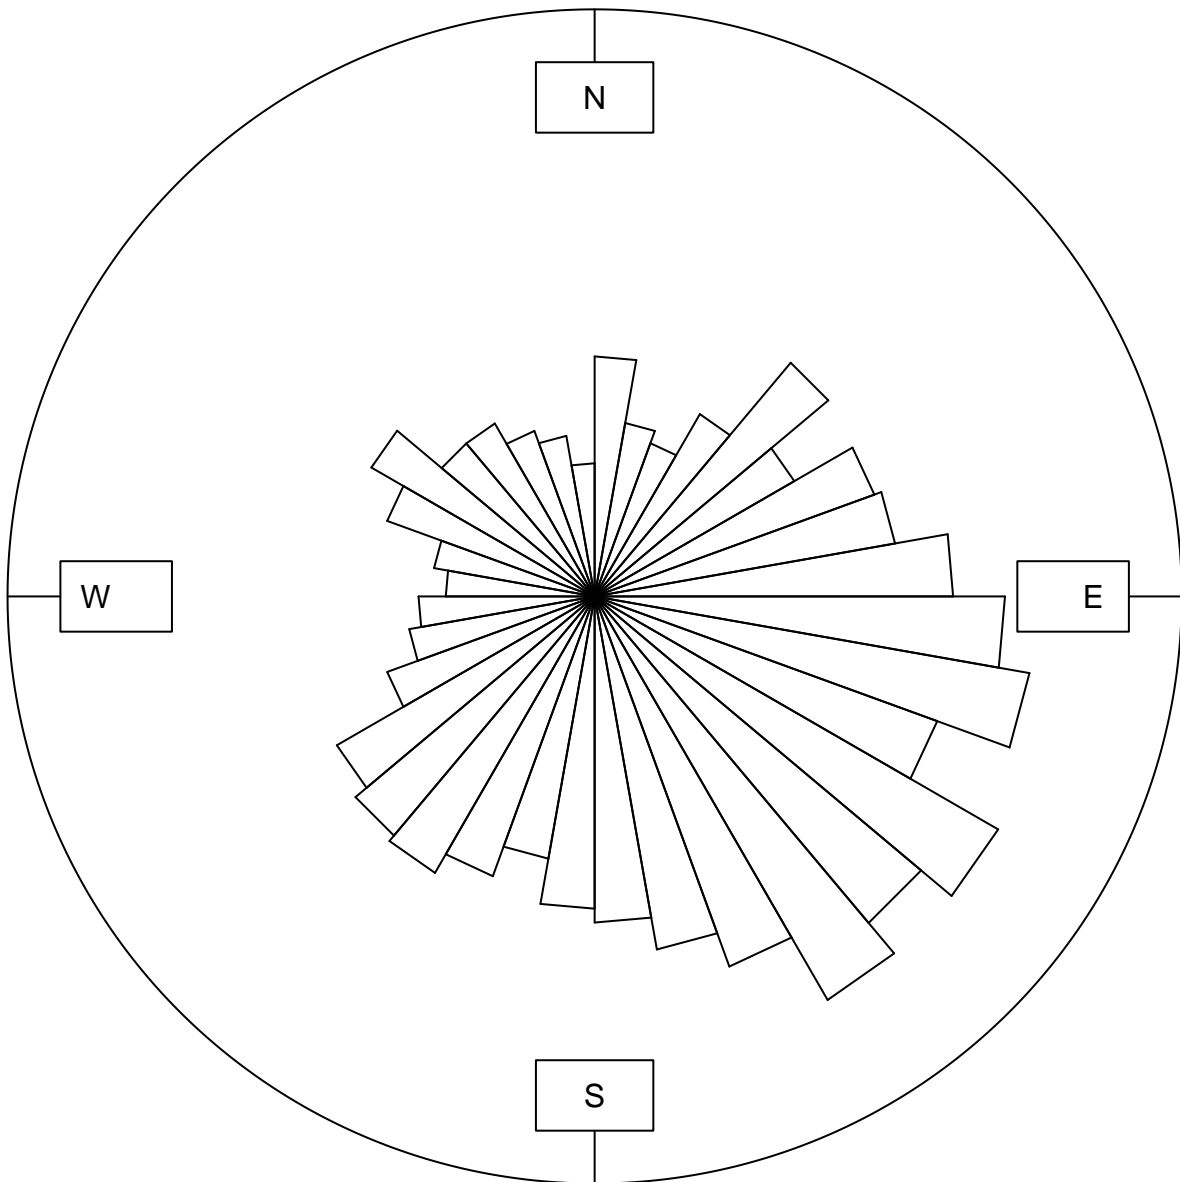

# bootstrap 354

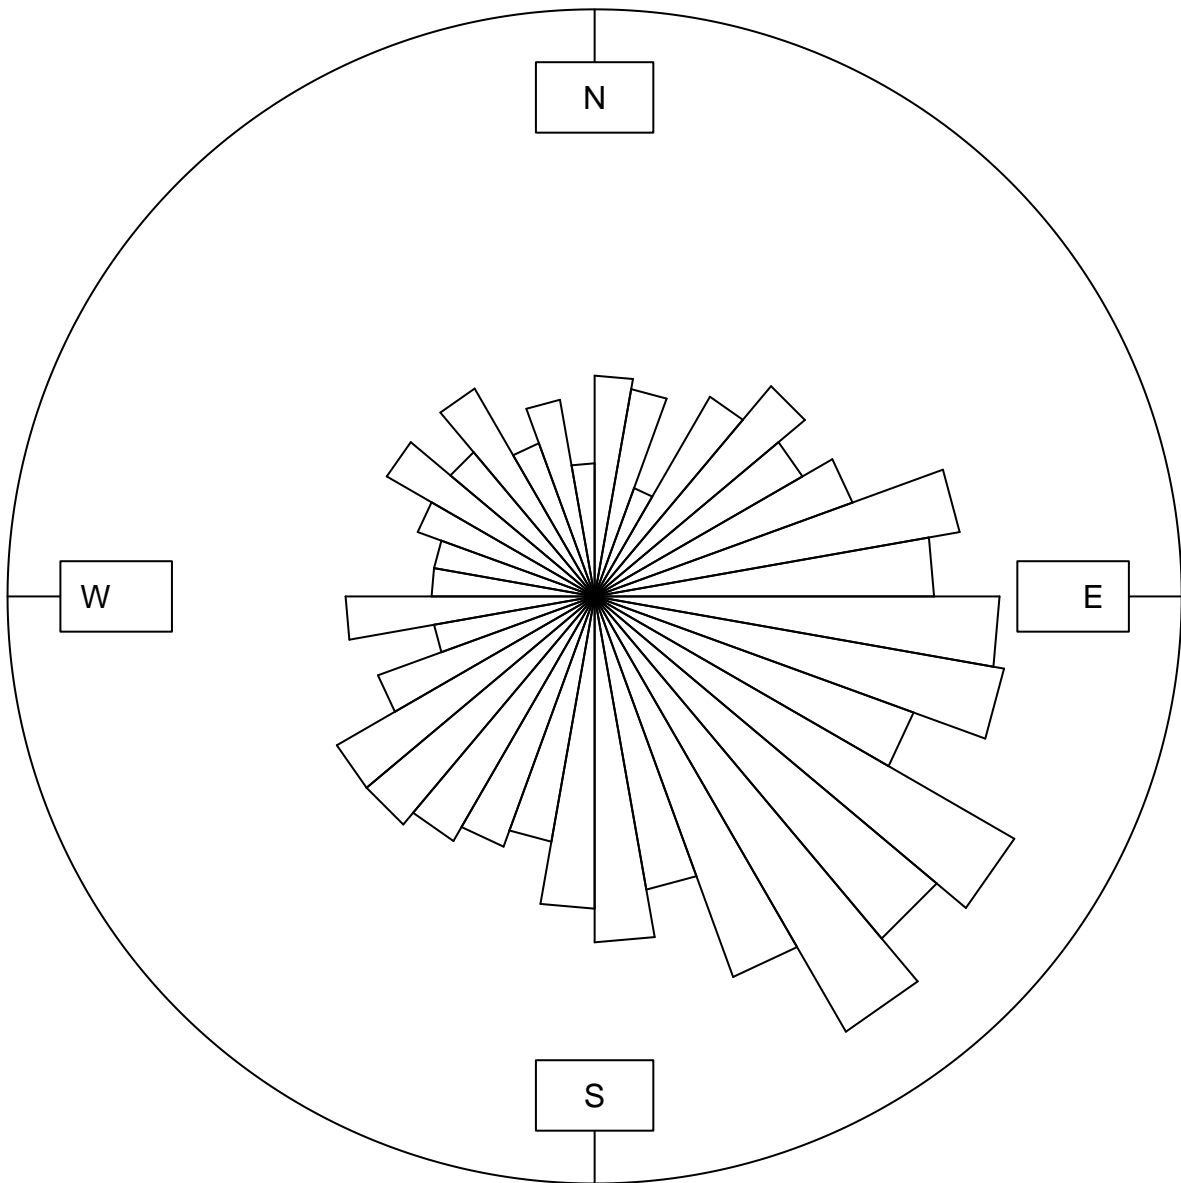

# bootstrap 355

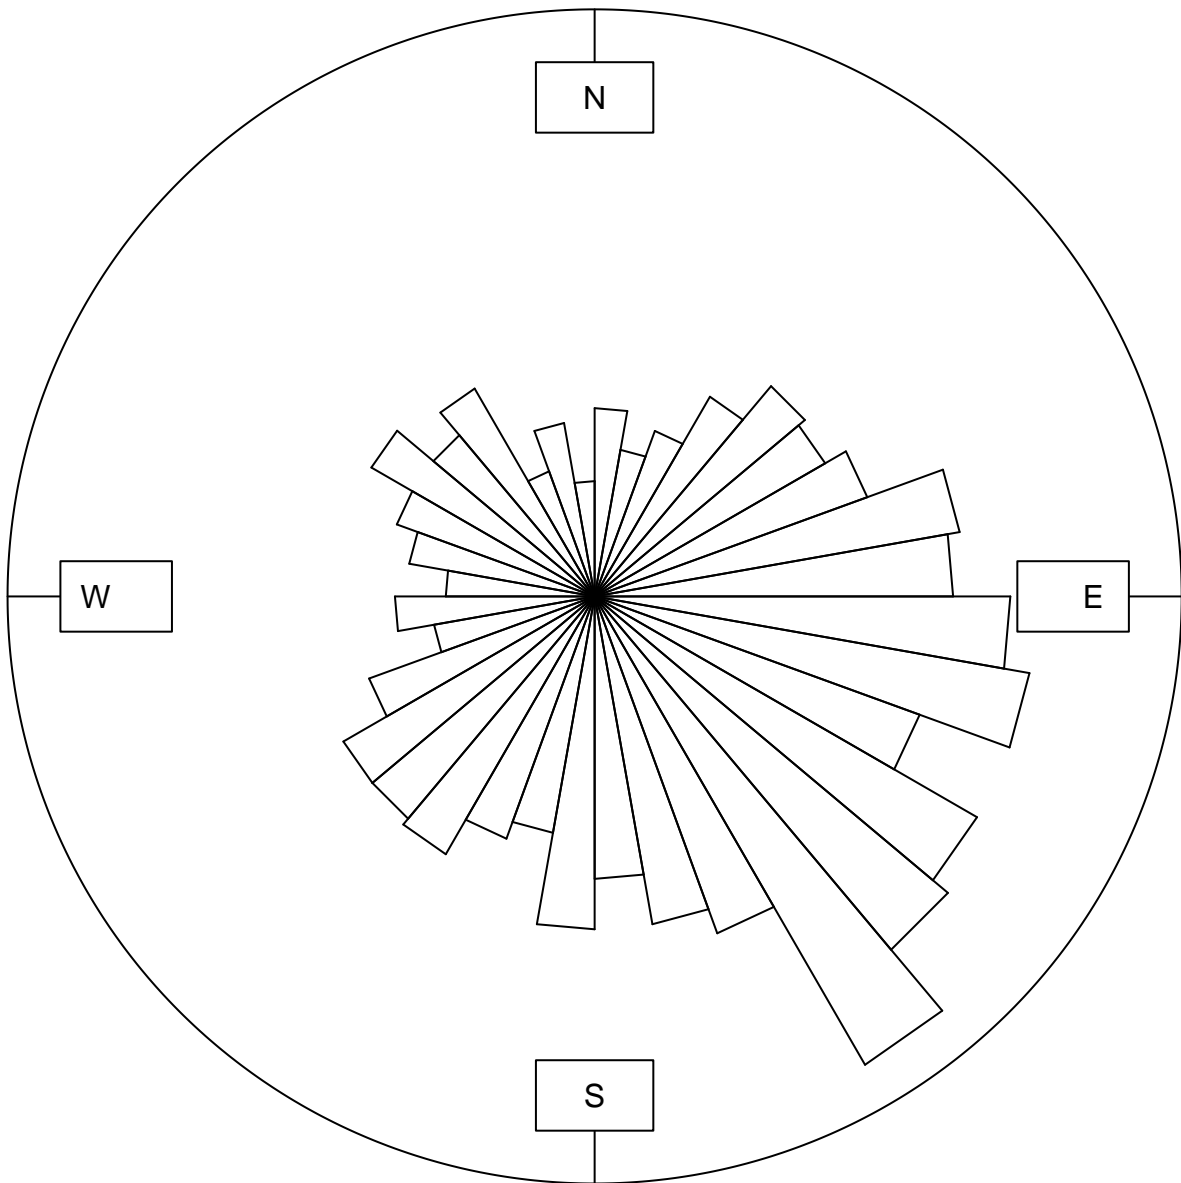

# bootstrap 356

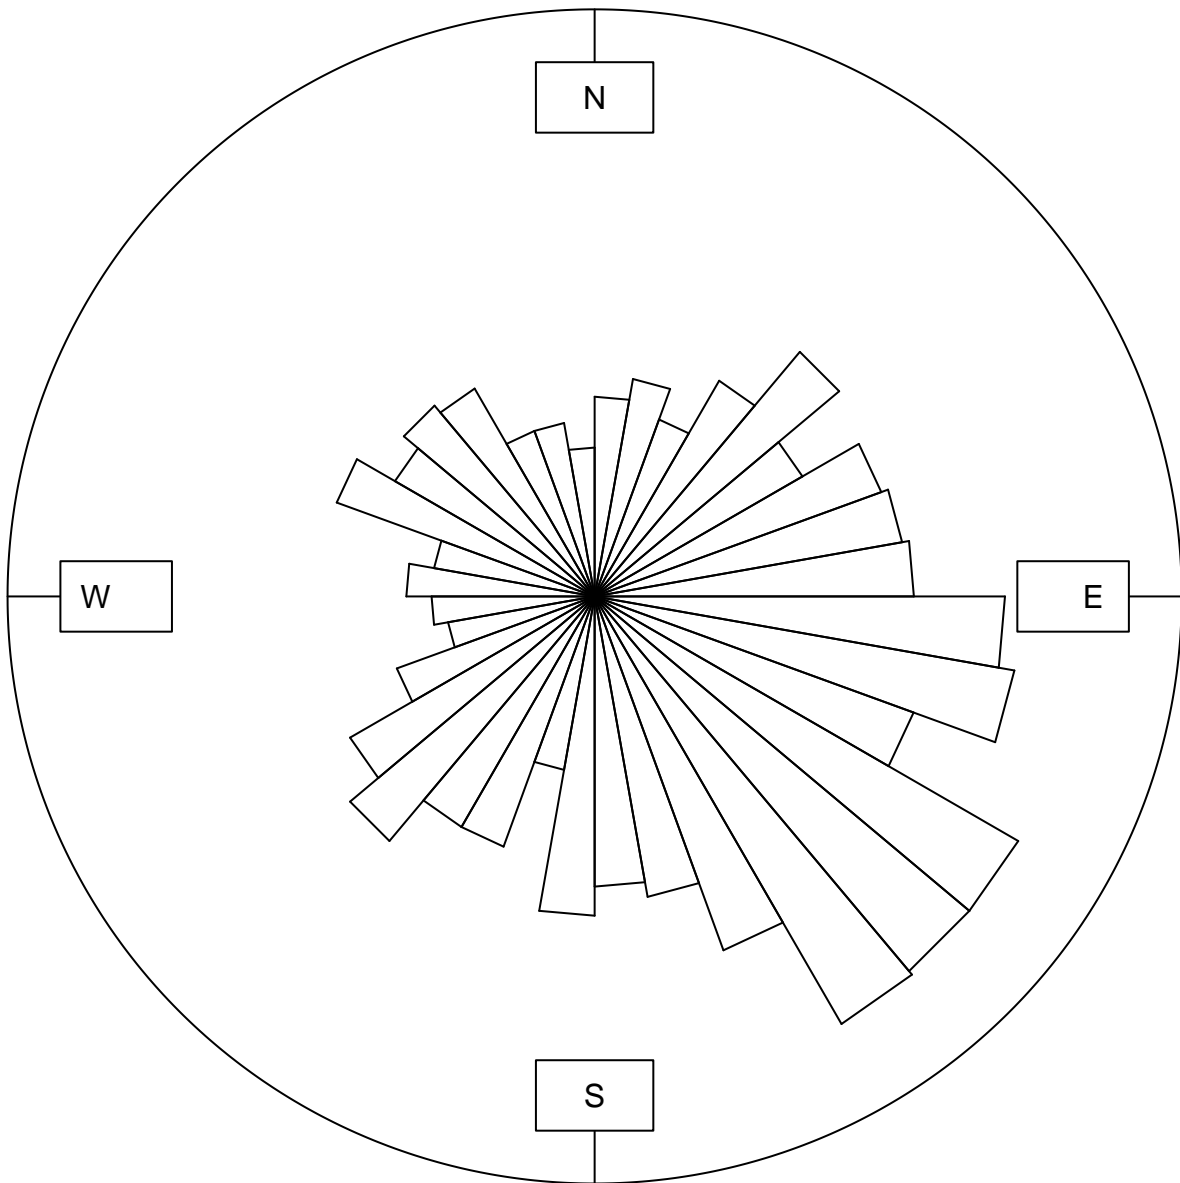

# bootstrap 357

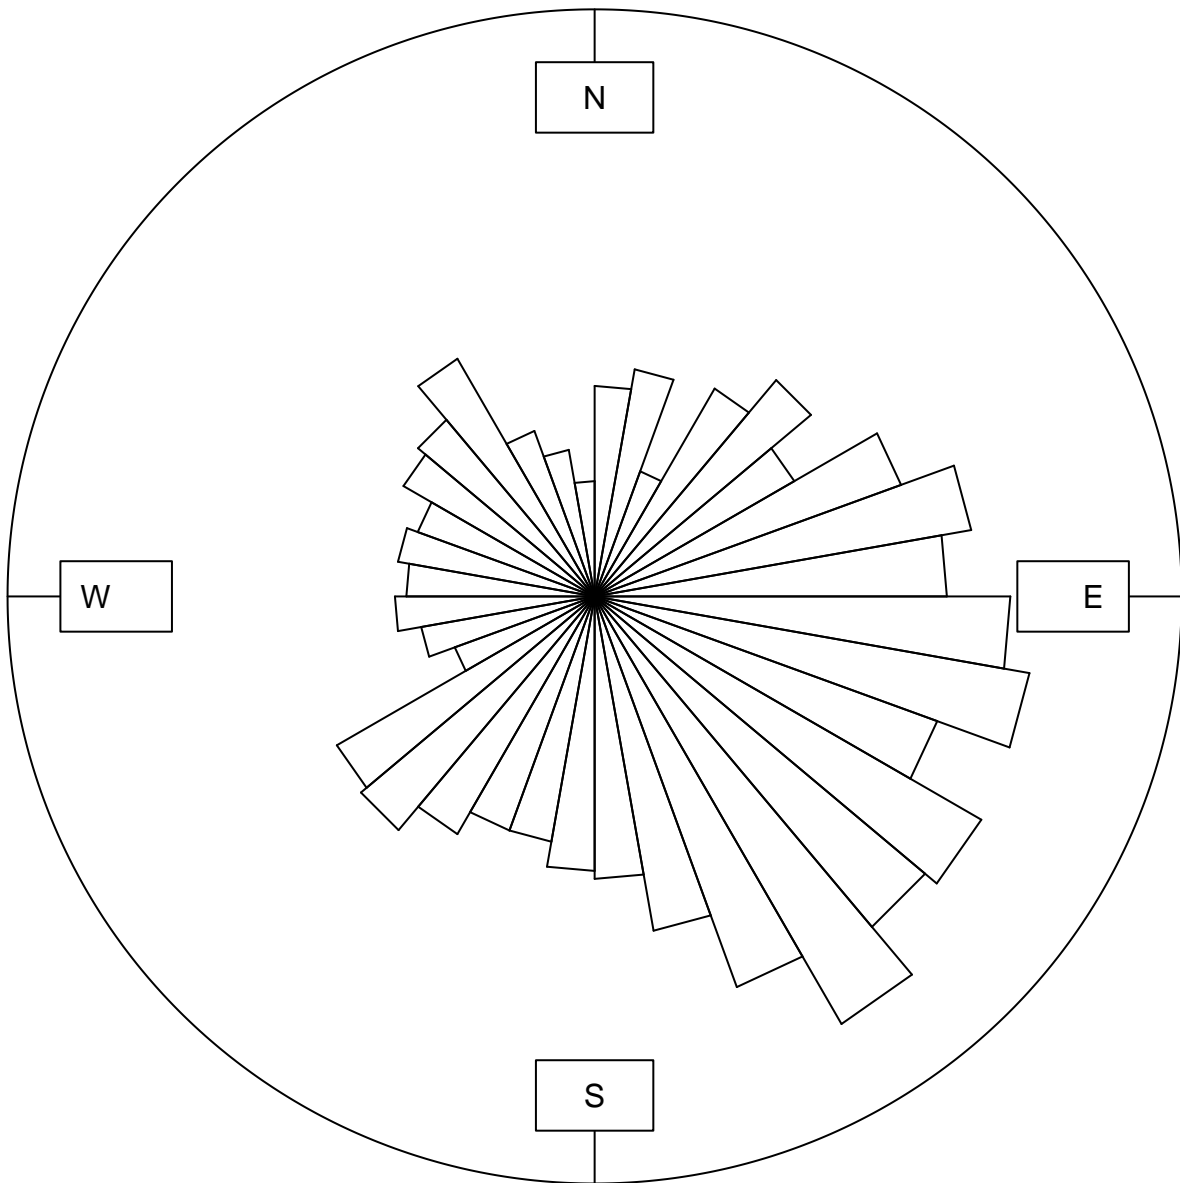

# bootstrap 358

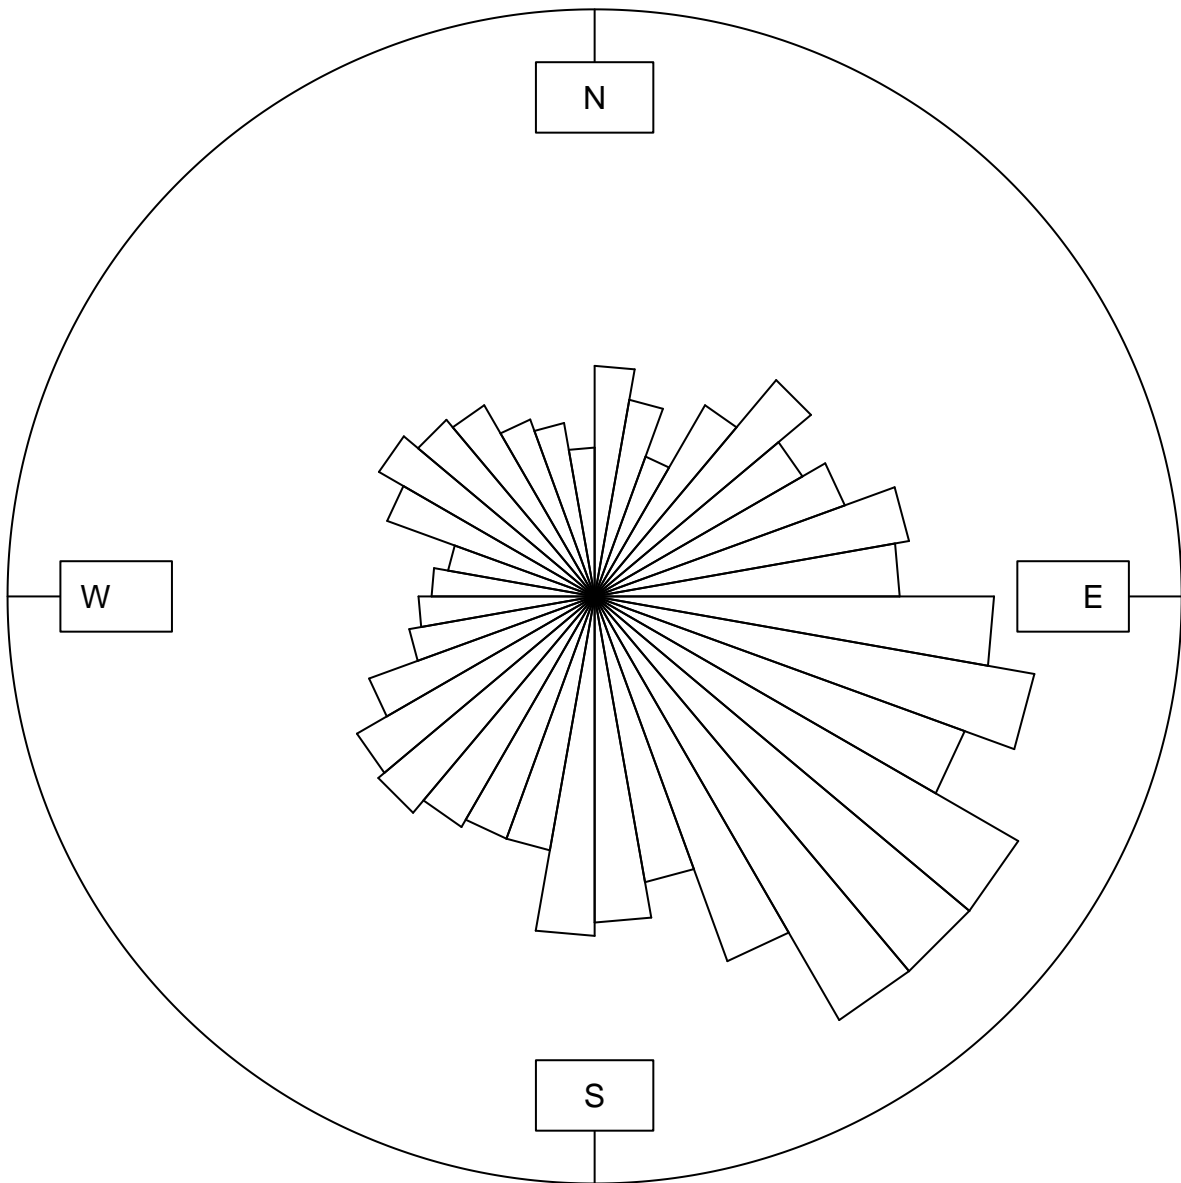

**bootstrap 359**

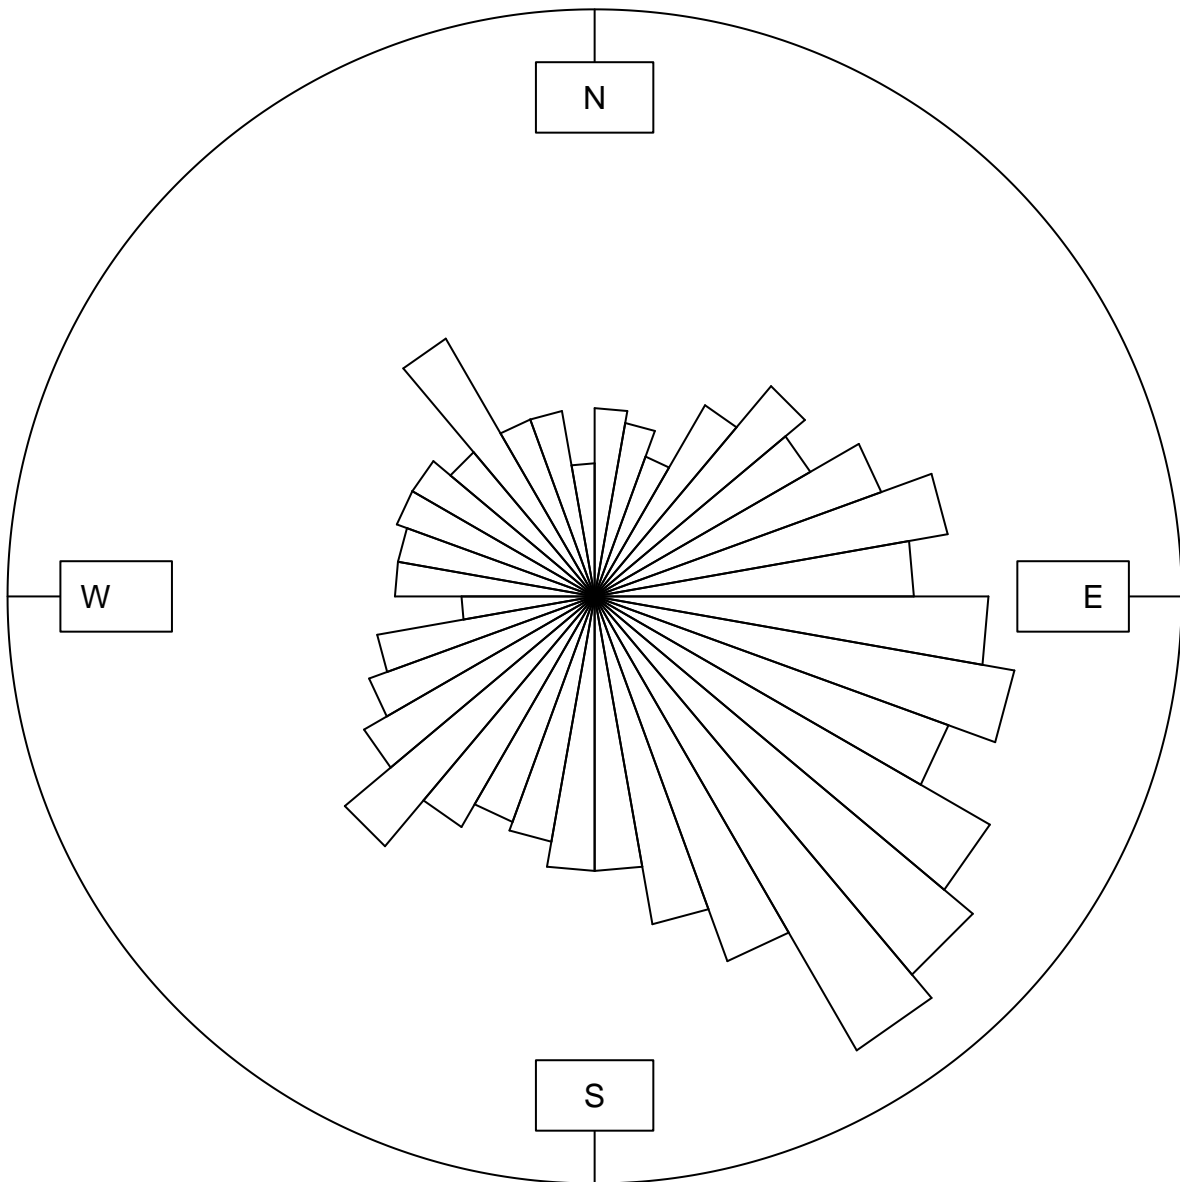

# bootstrap 360

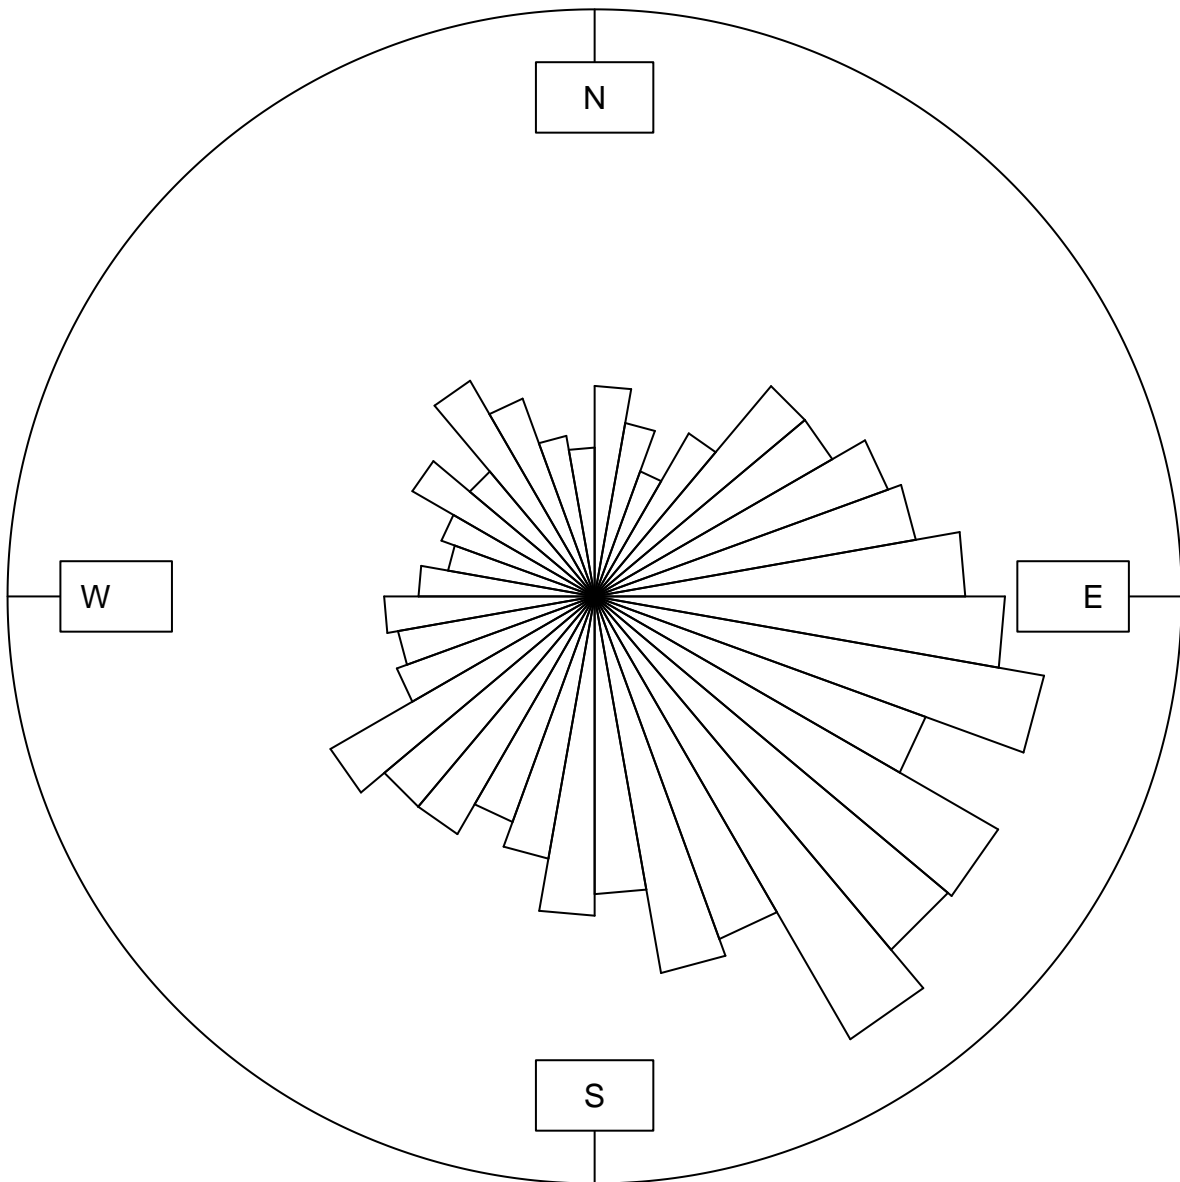



# bootstrap 361

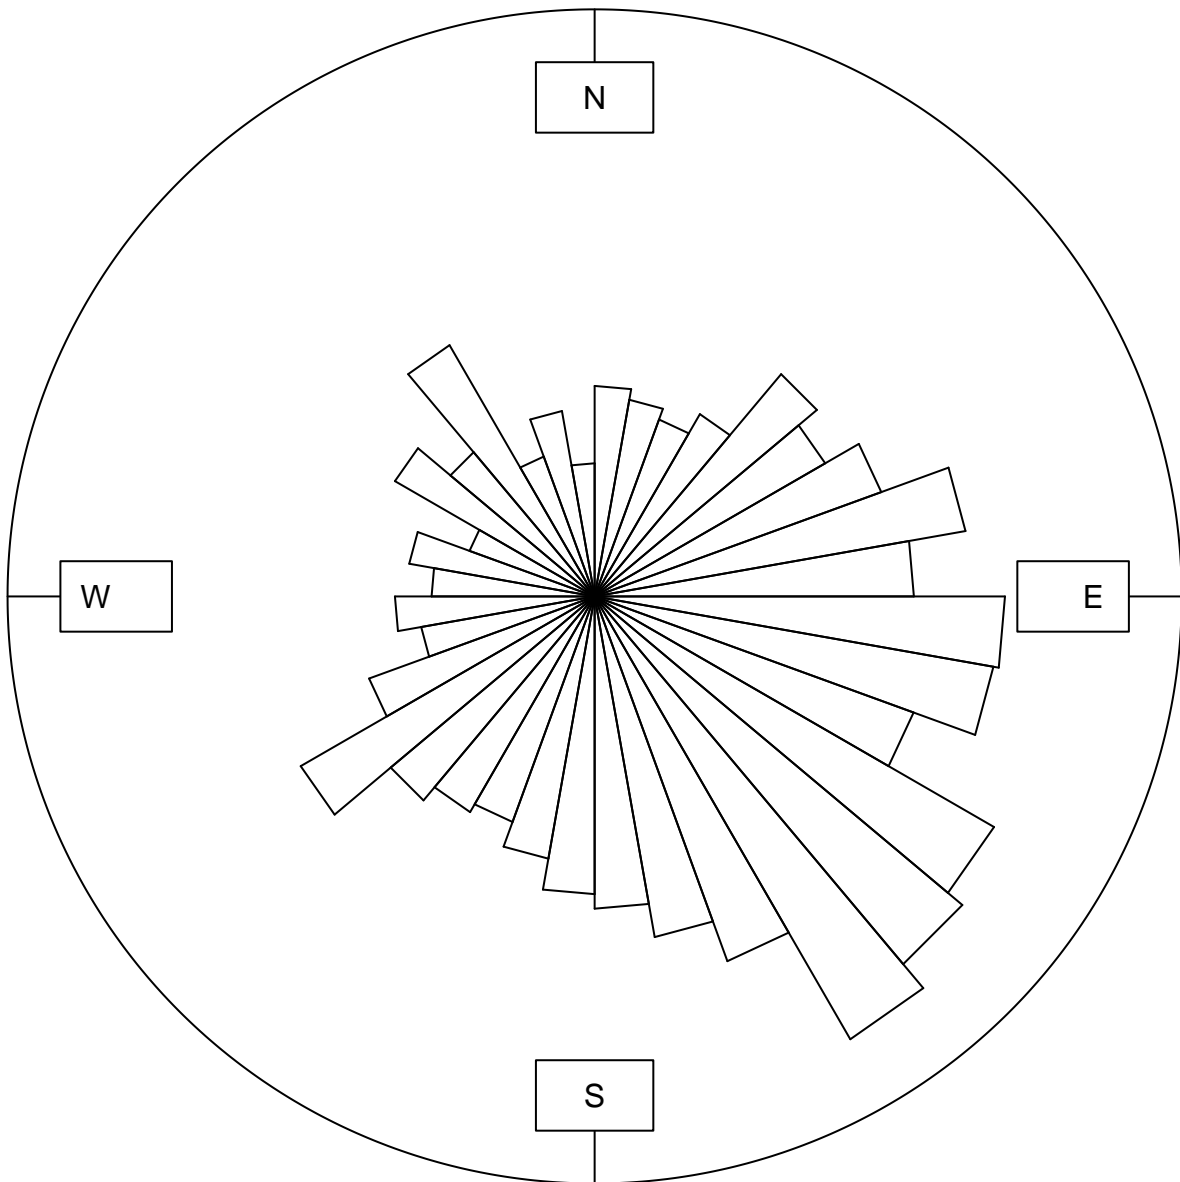

# bootstrap 362

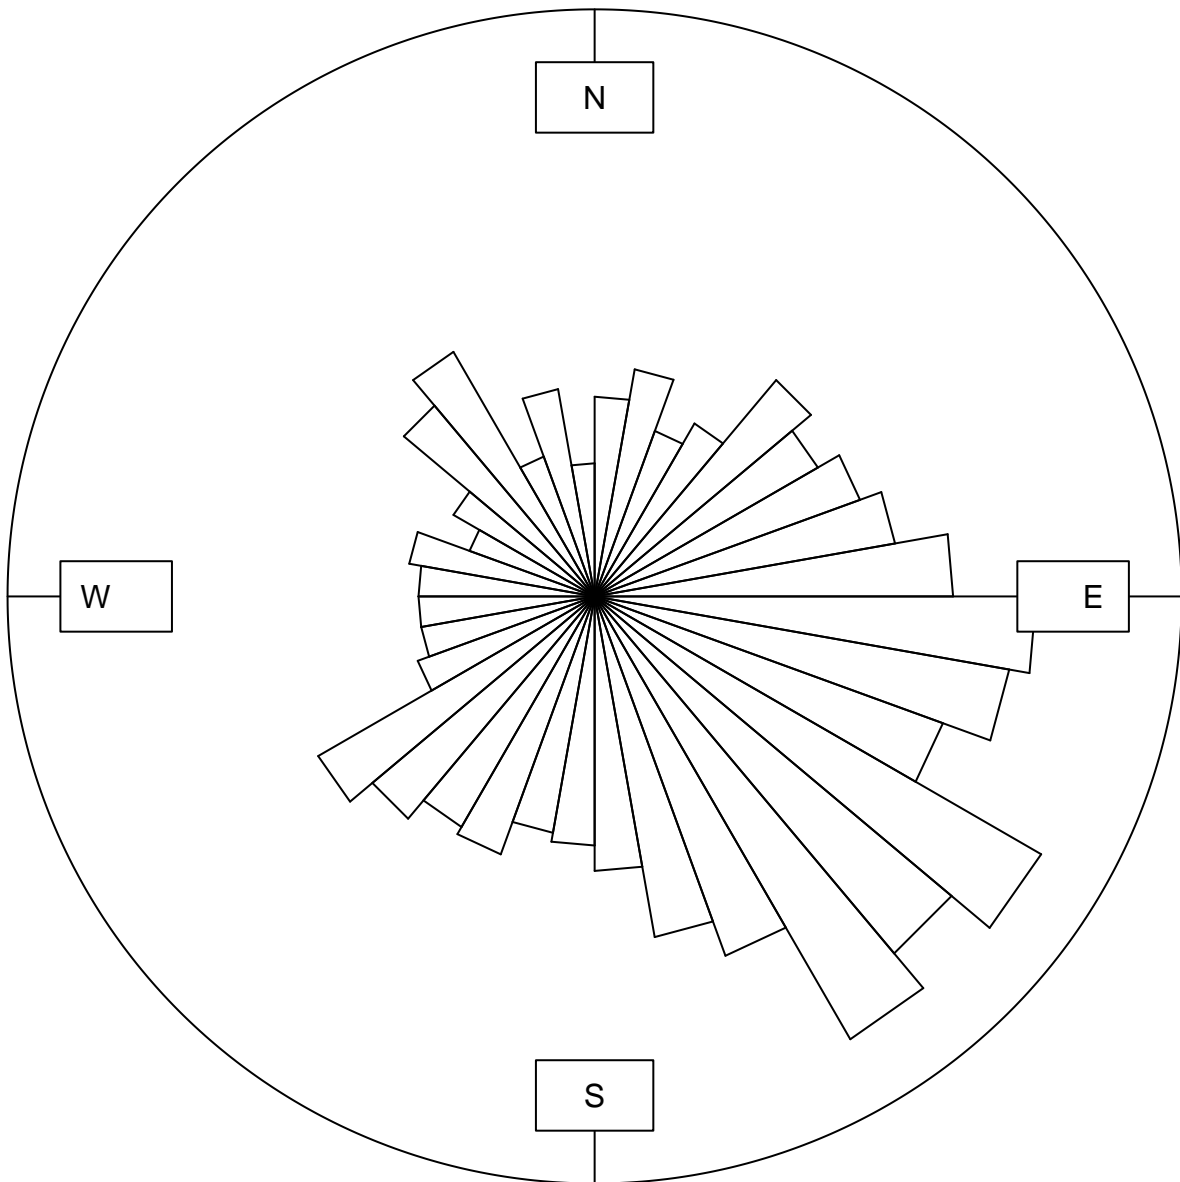

# bootstrap 363

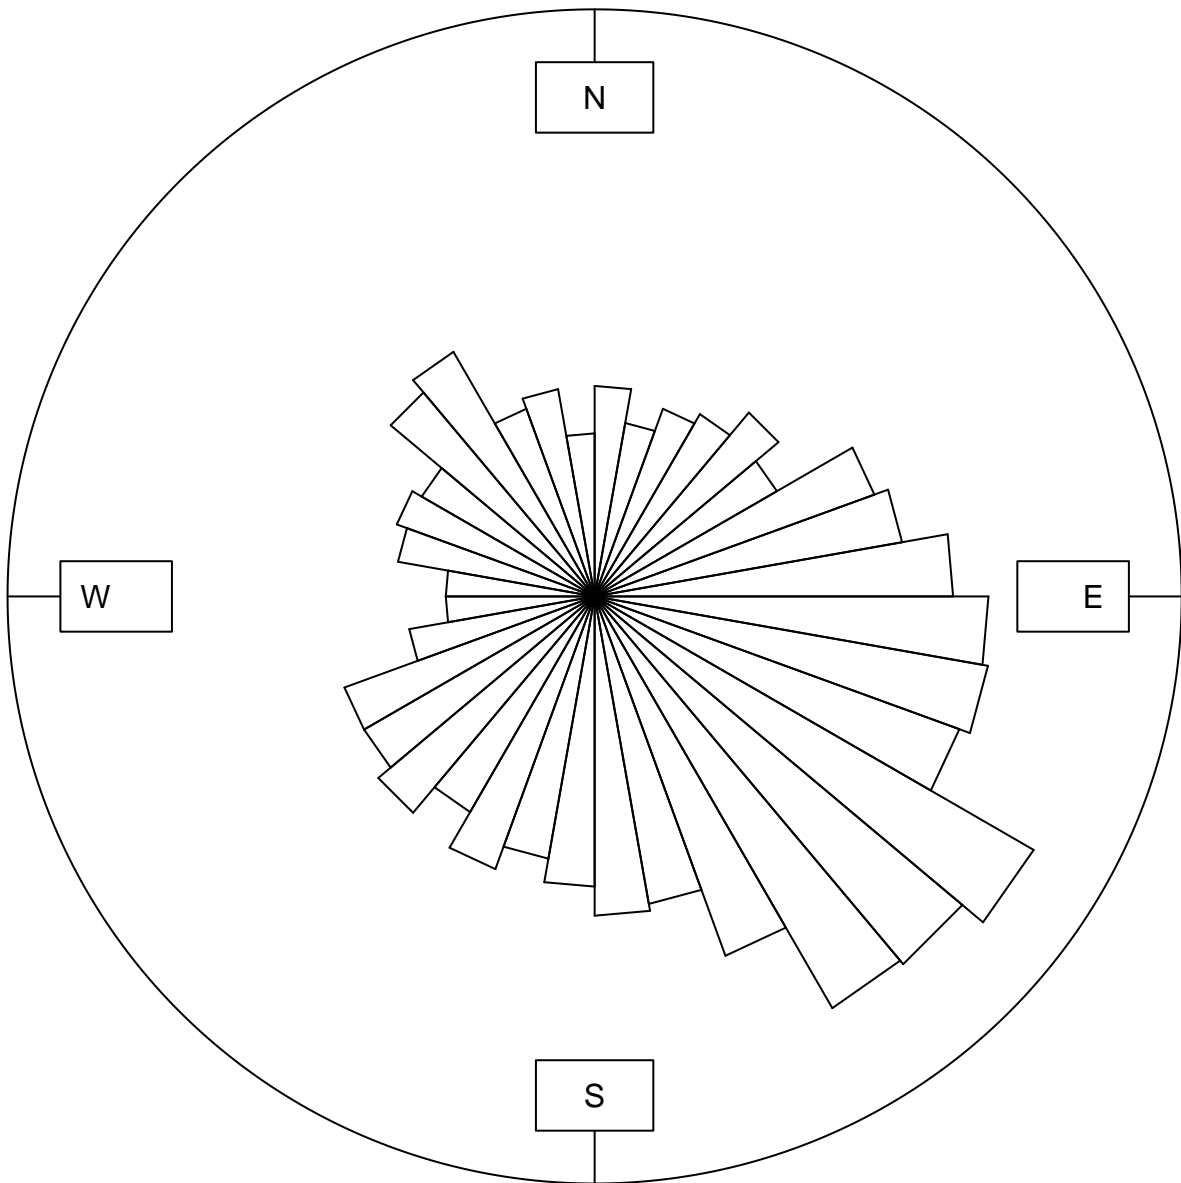

# bootstrap 364

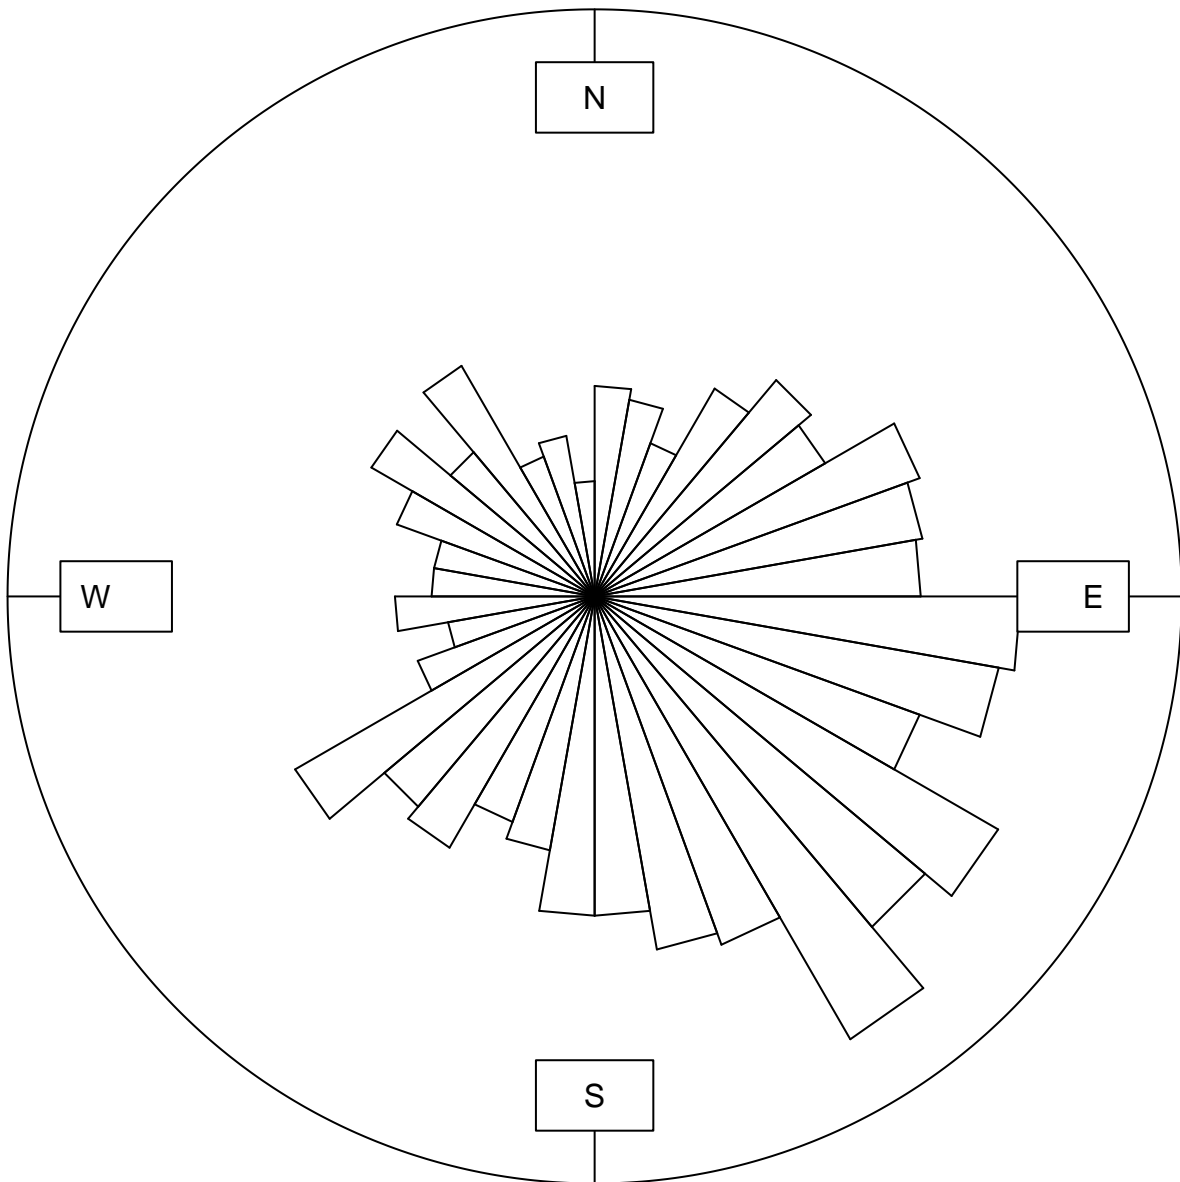

# bootstrap 365

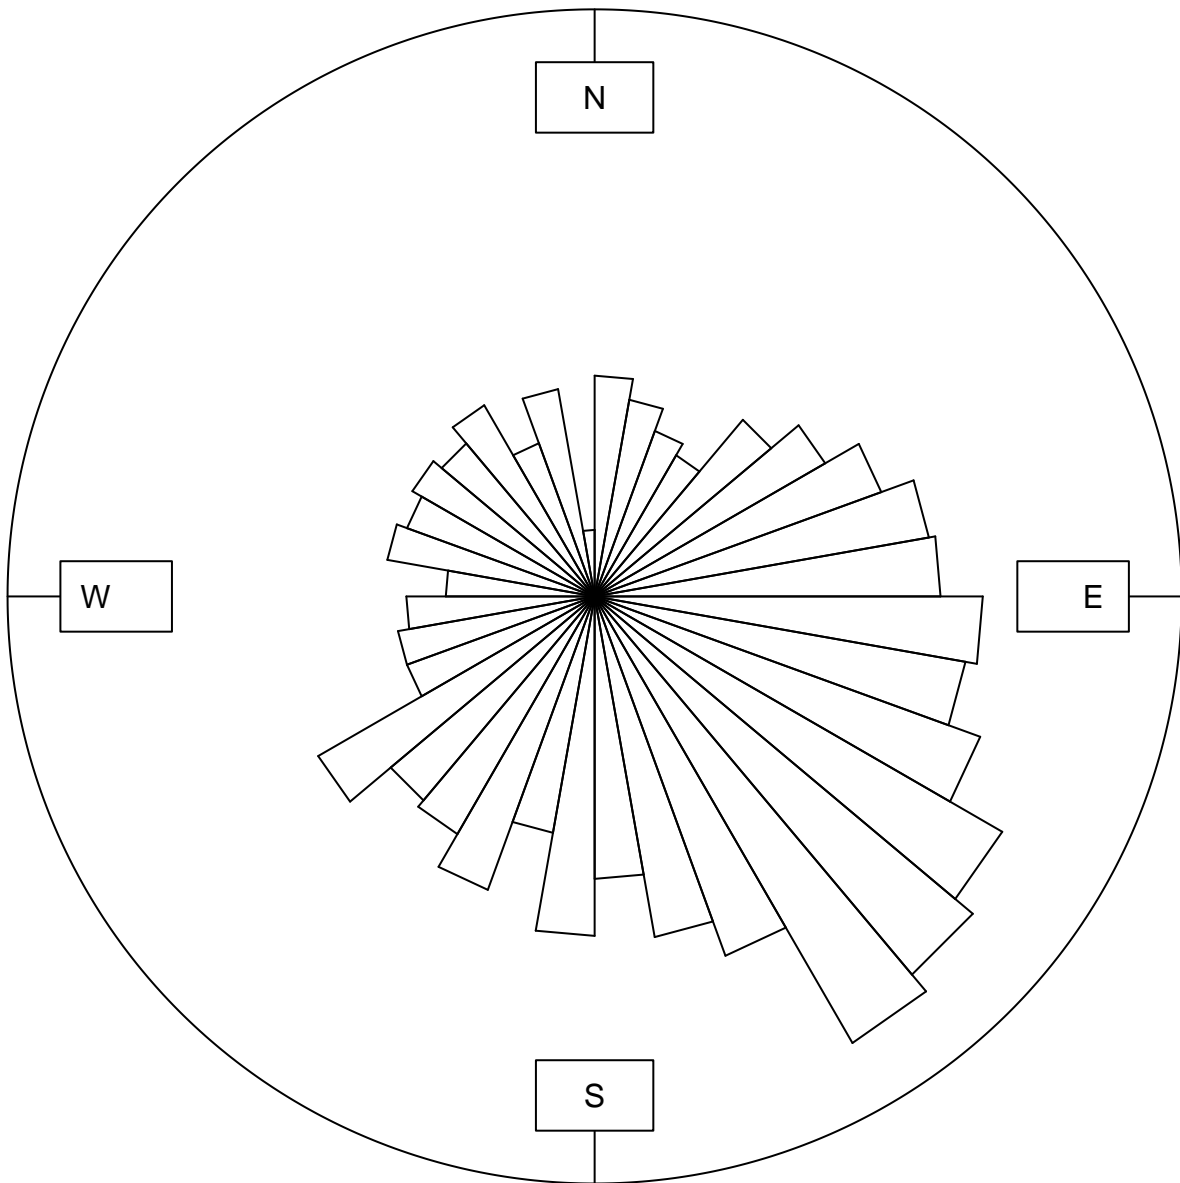

# bootstrap 366

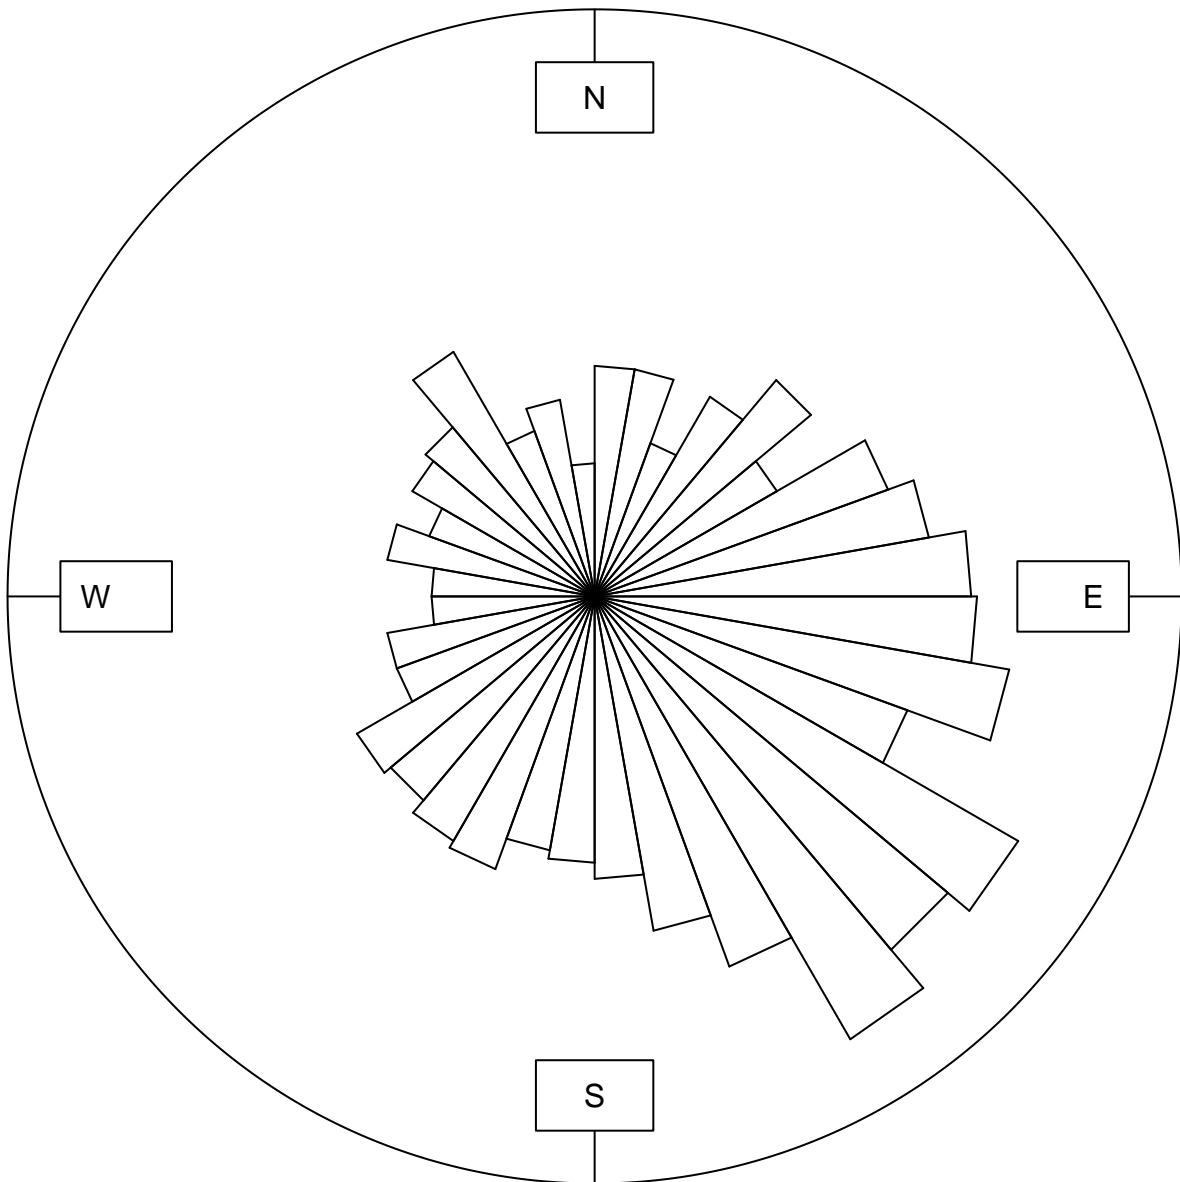

# bootstrap 367

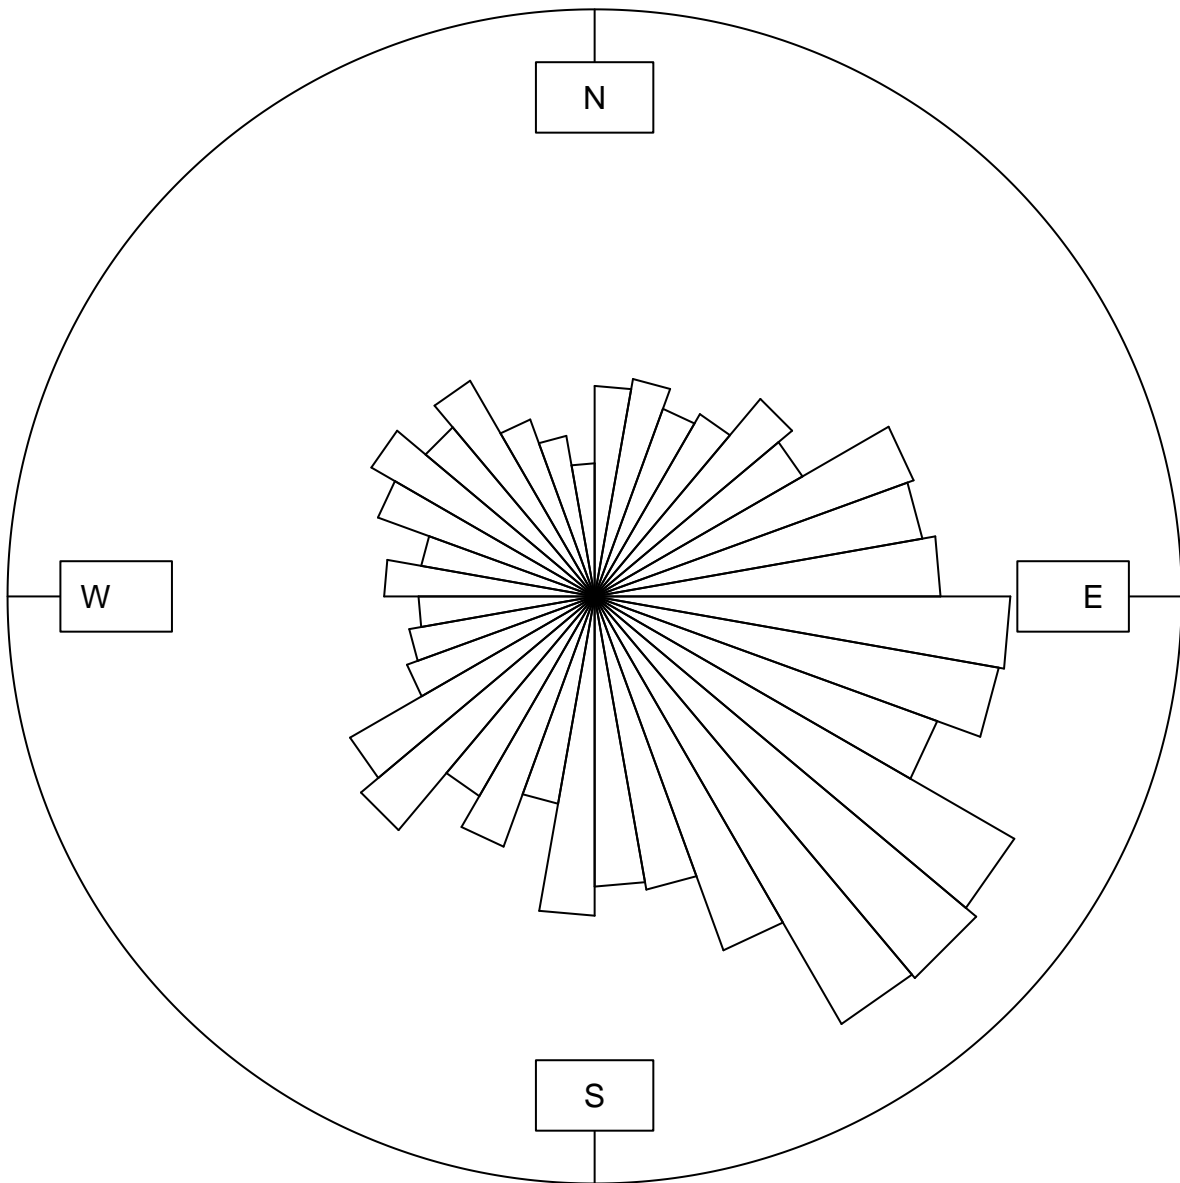

bootstrap 368

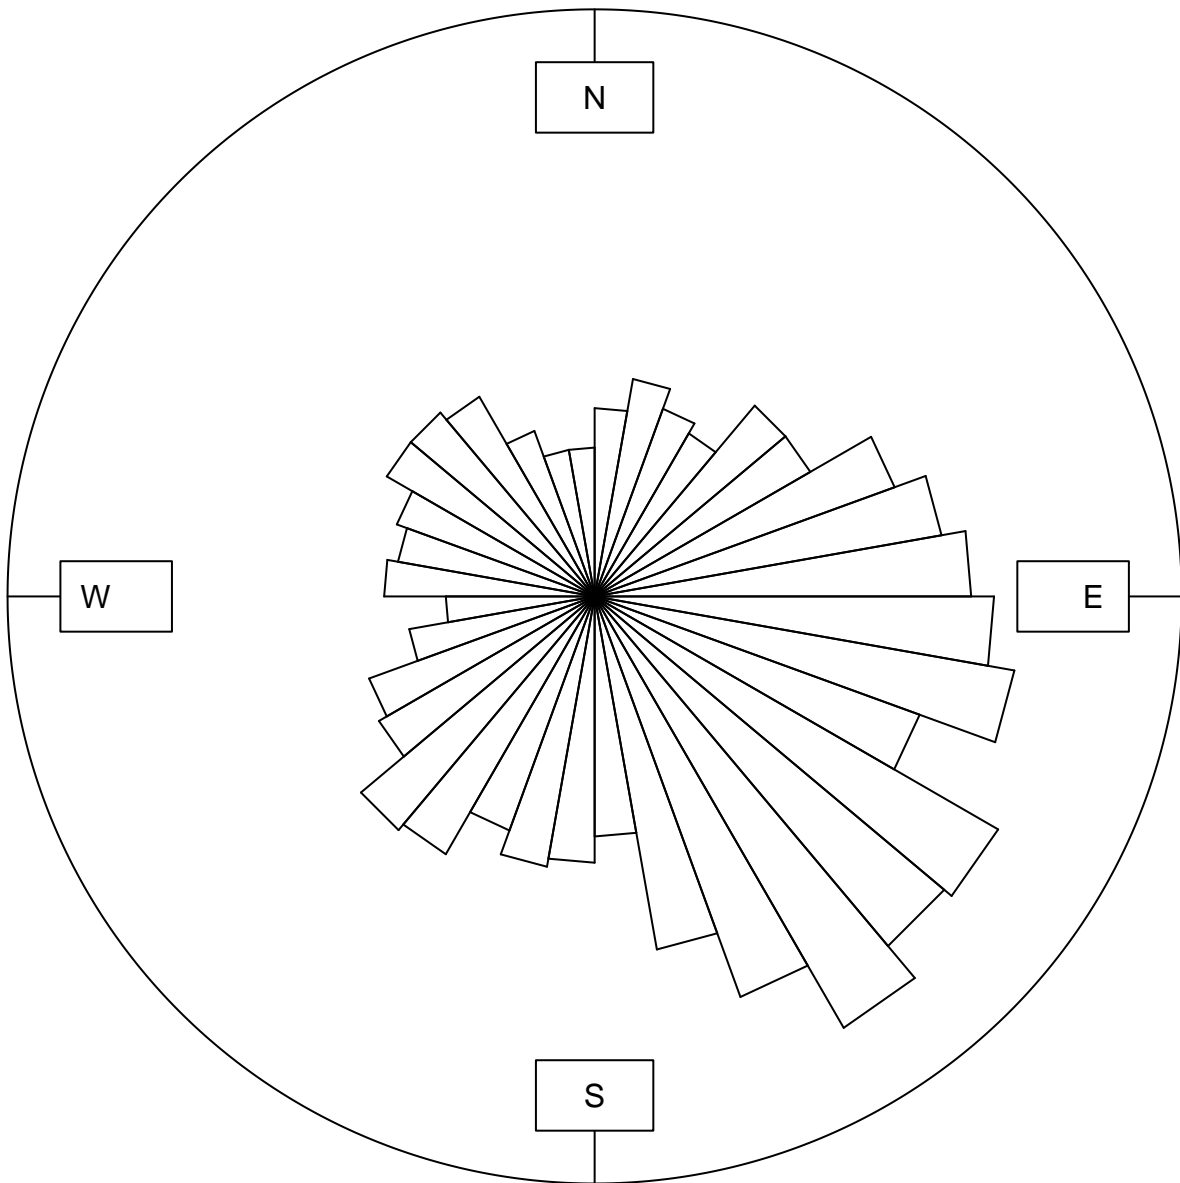



# bootstrap 369

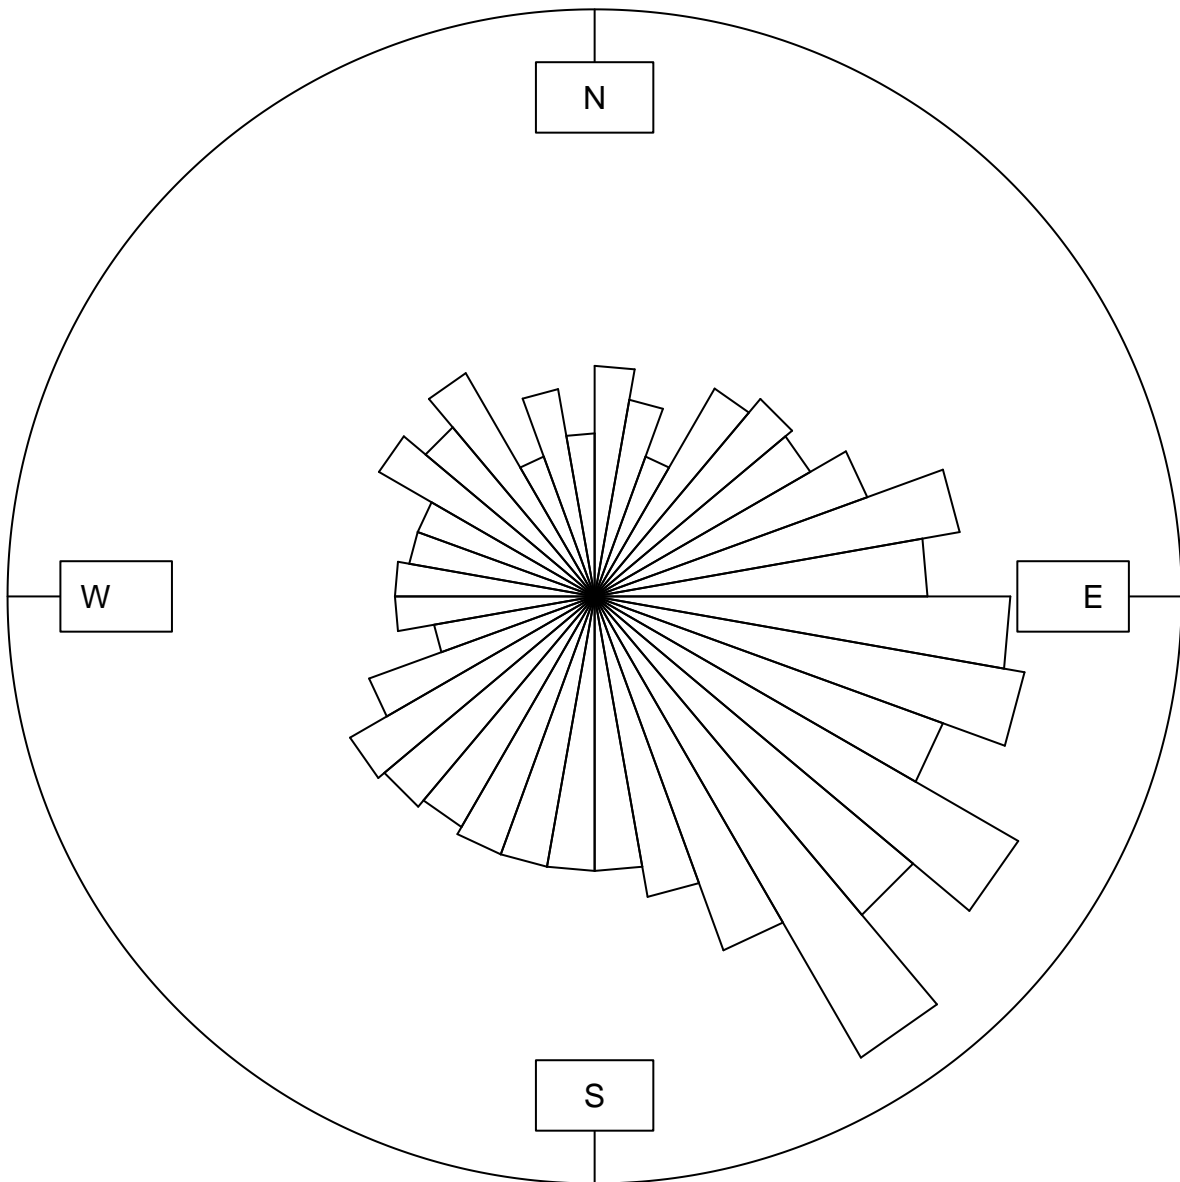

# bootstrap 370

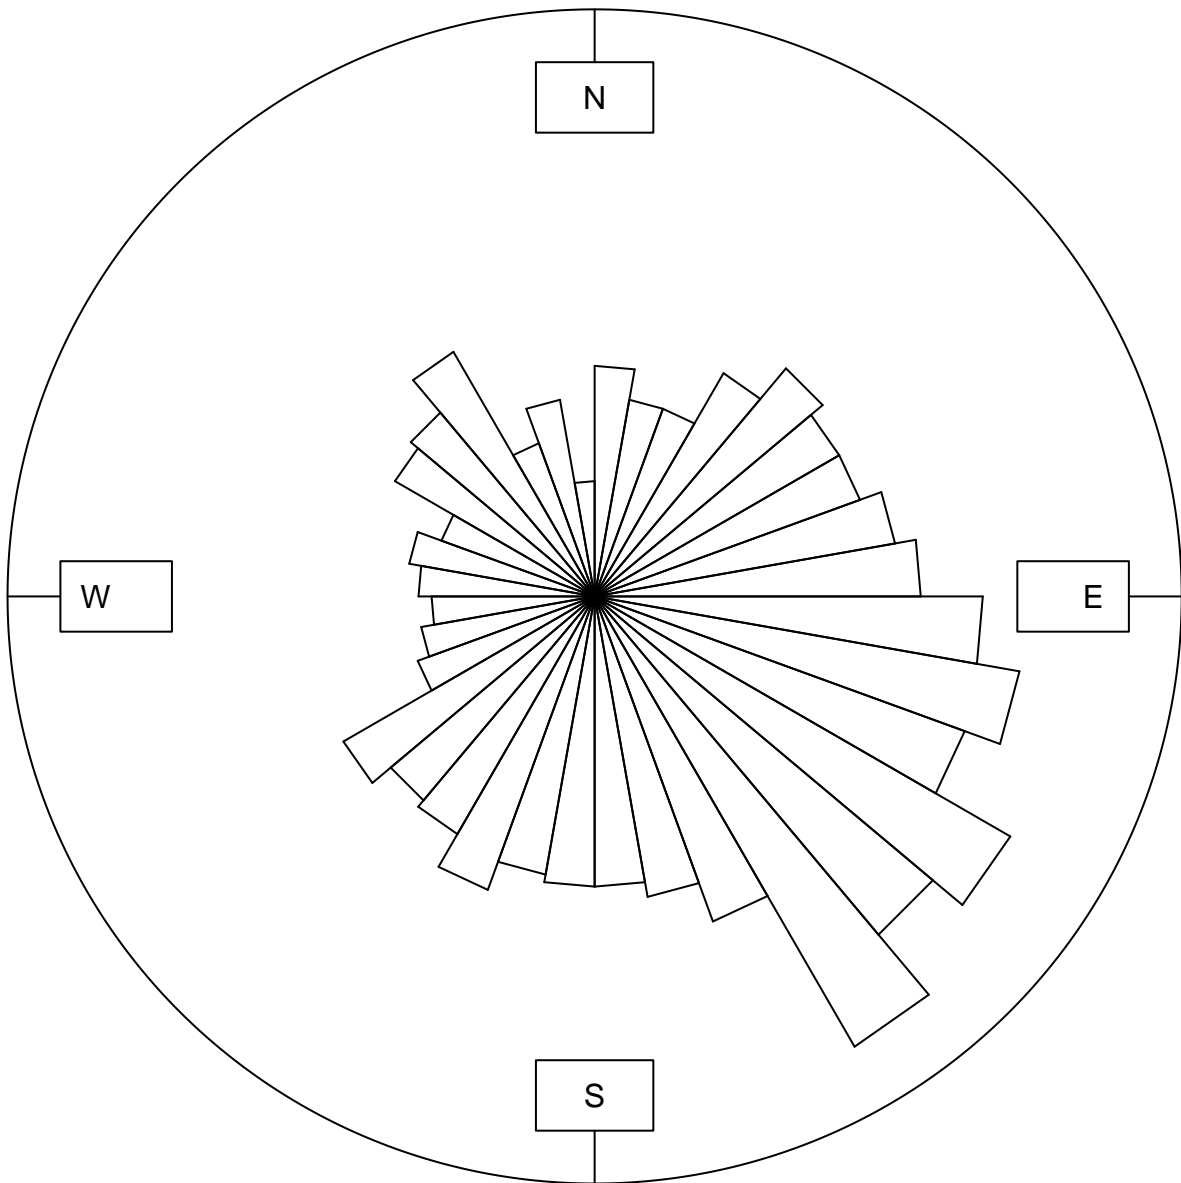

# bootstrap 371

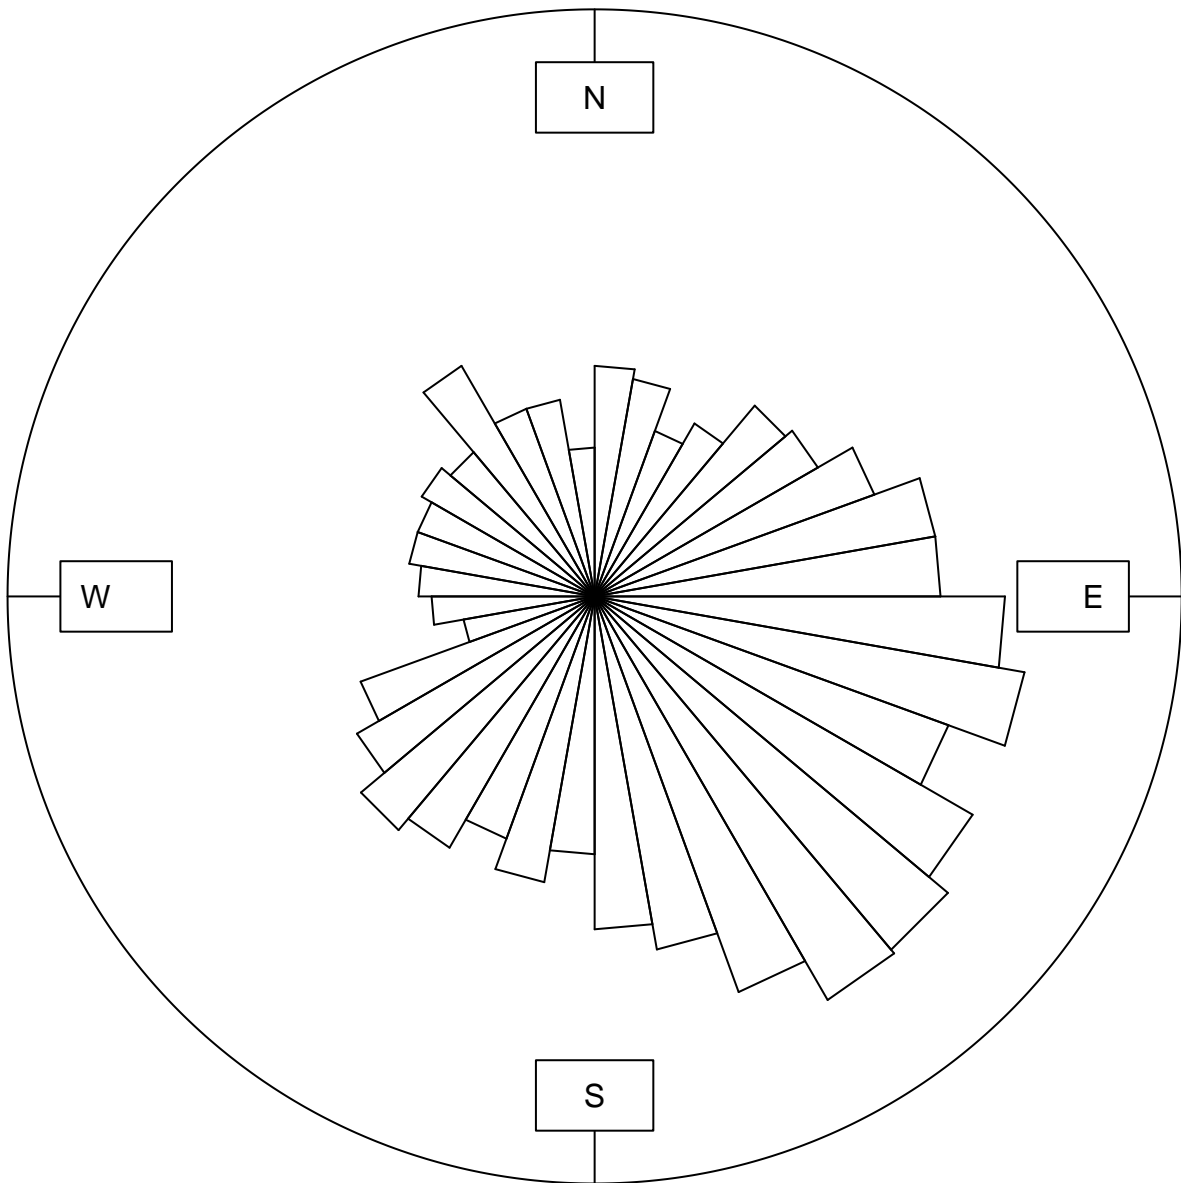

# bootstrap 372

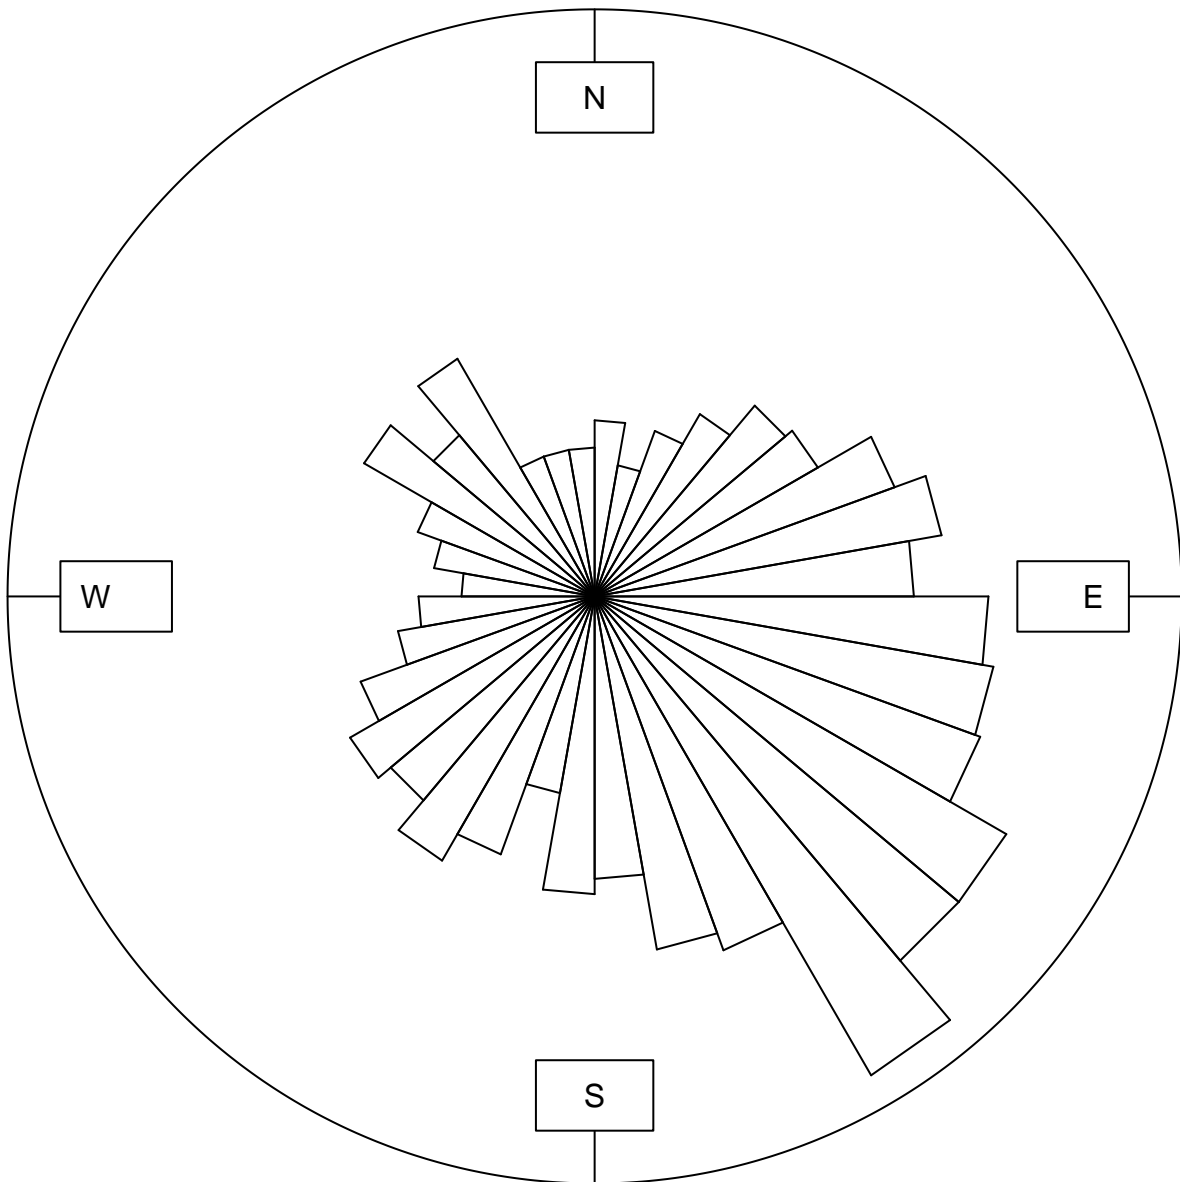

# bootstrap 373

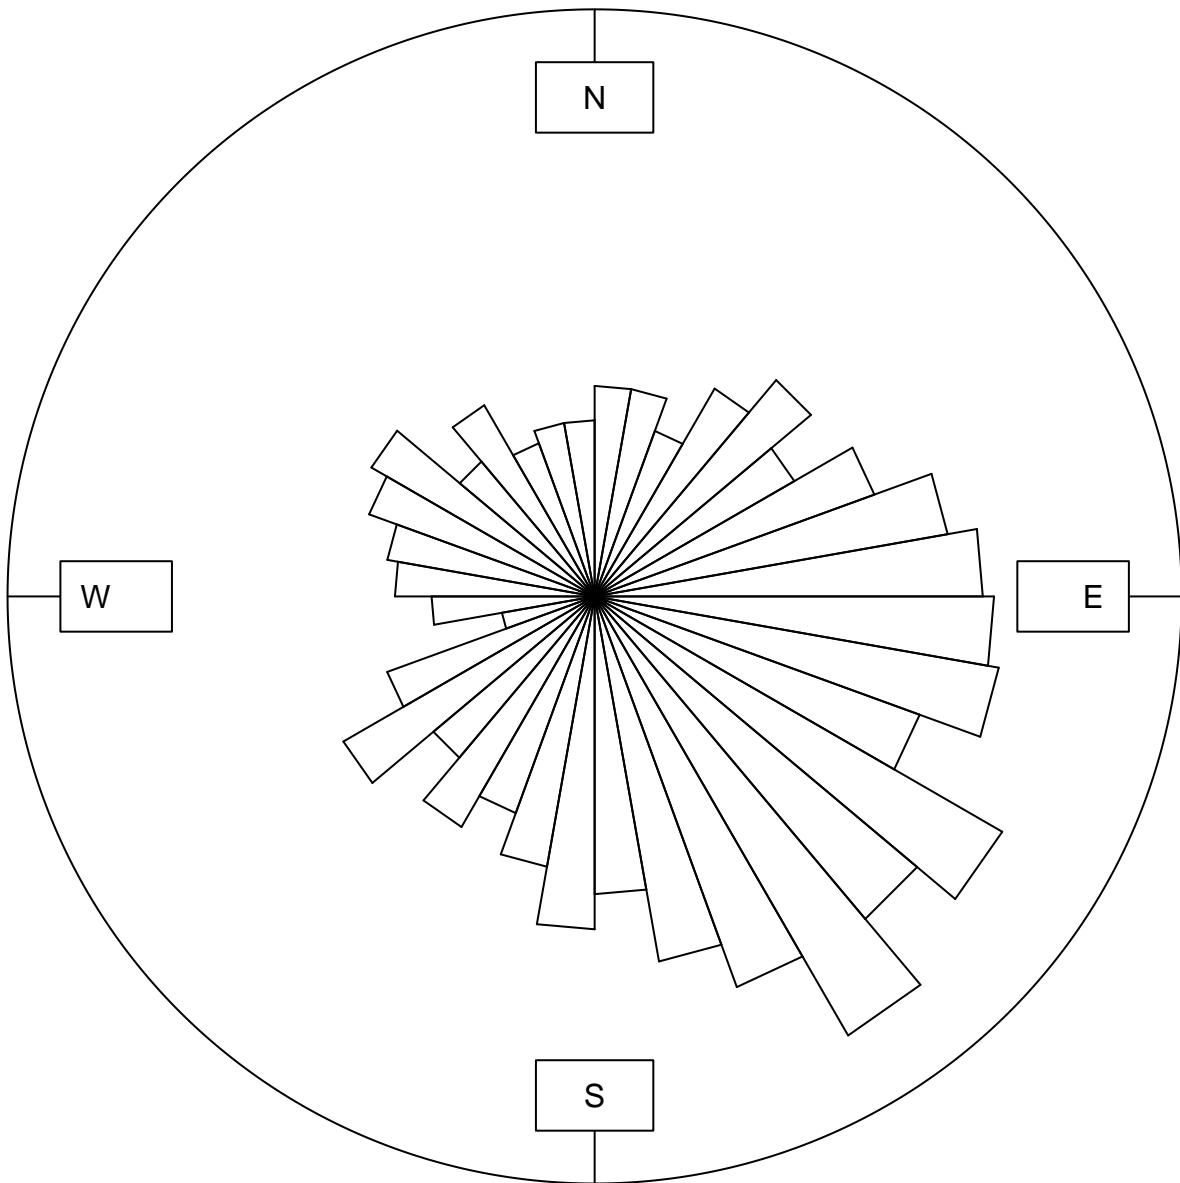

# bootstrap 374

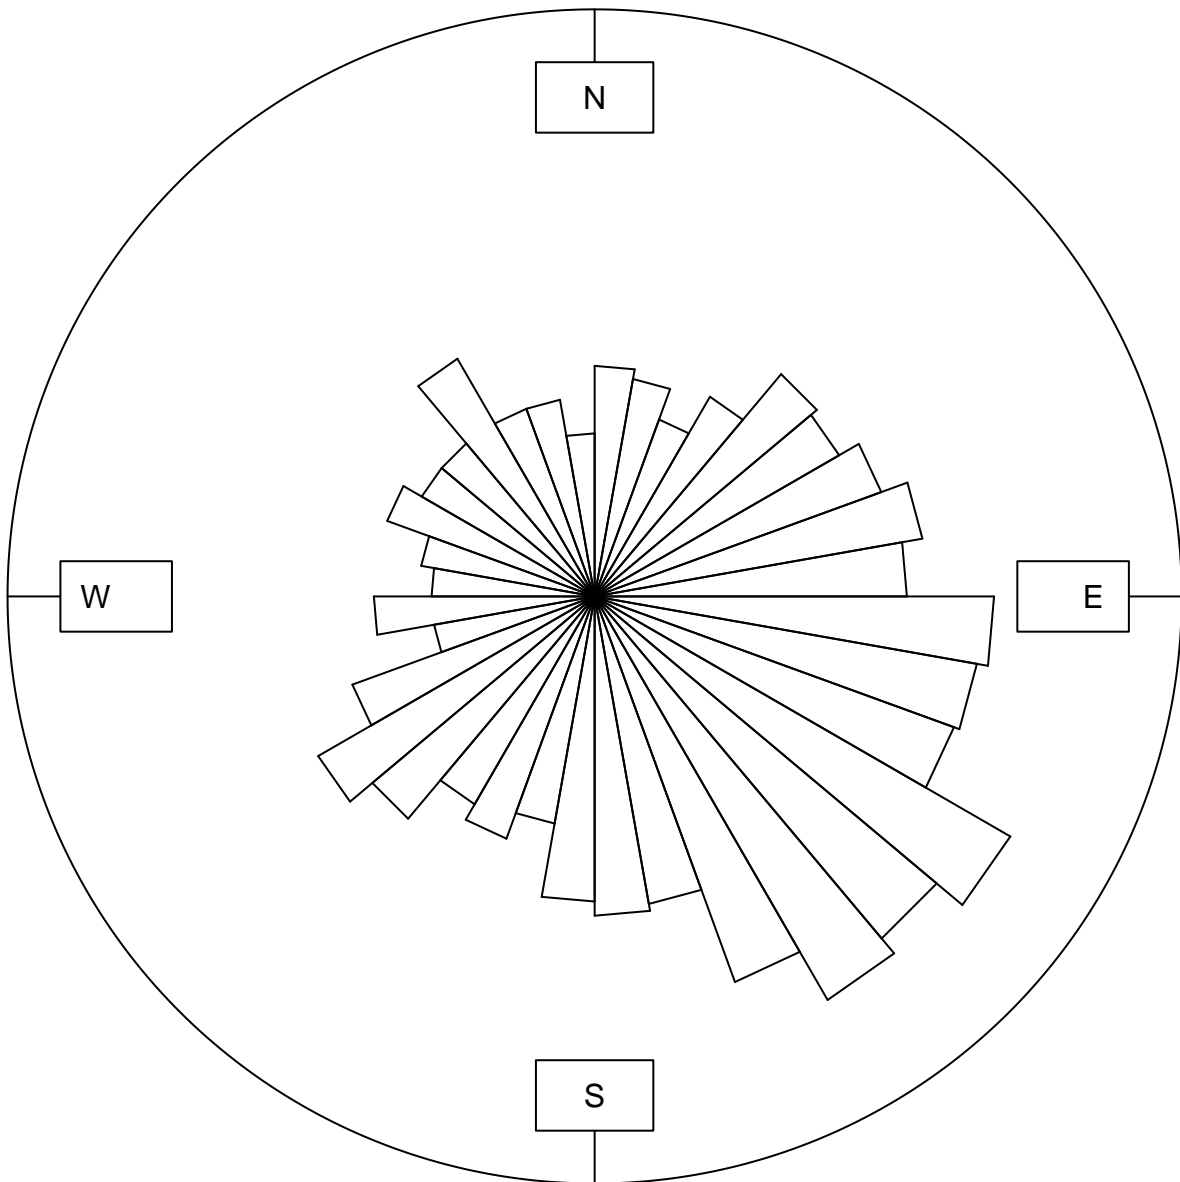

**bootstrap 375**

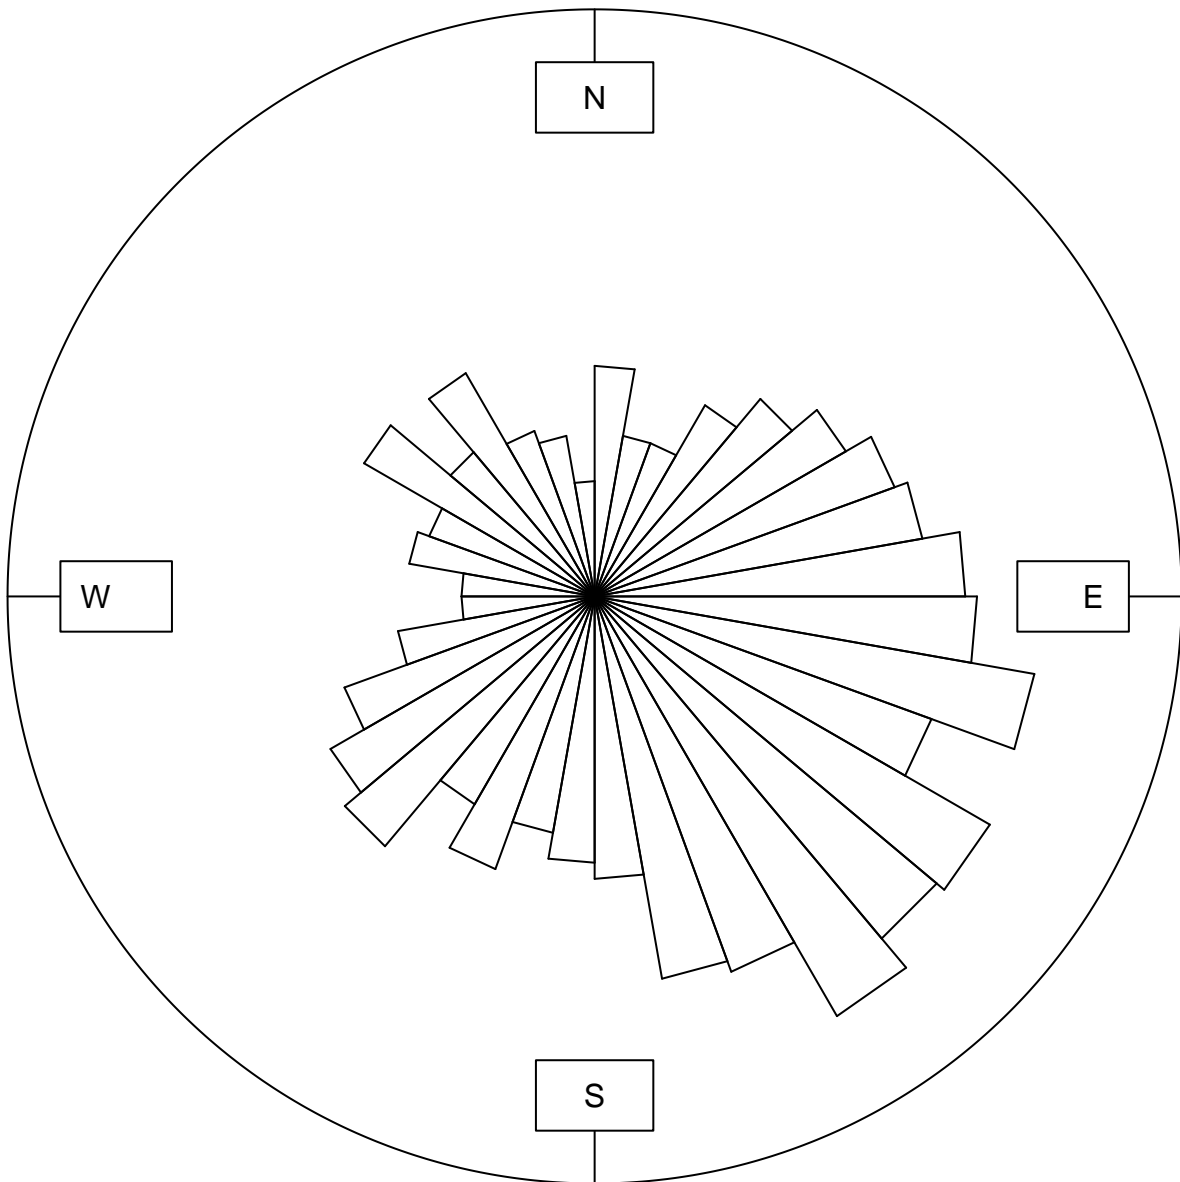

**bootstrap 376**

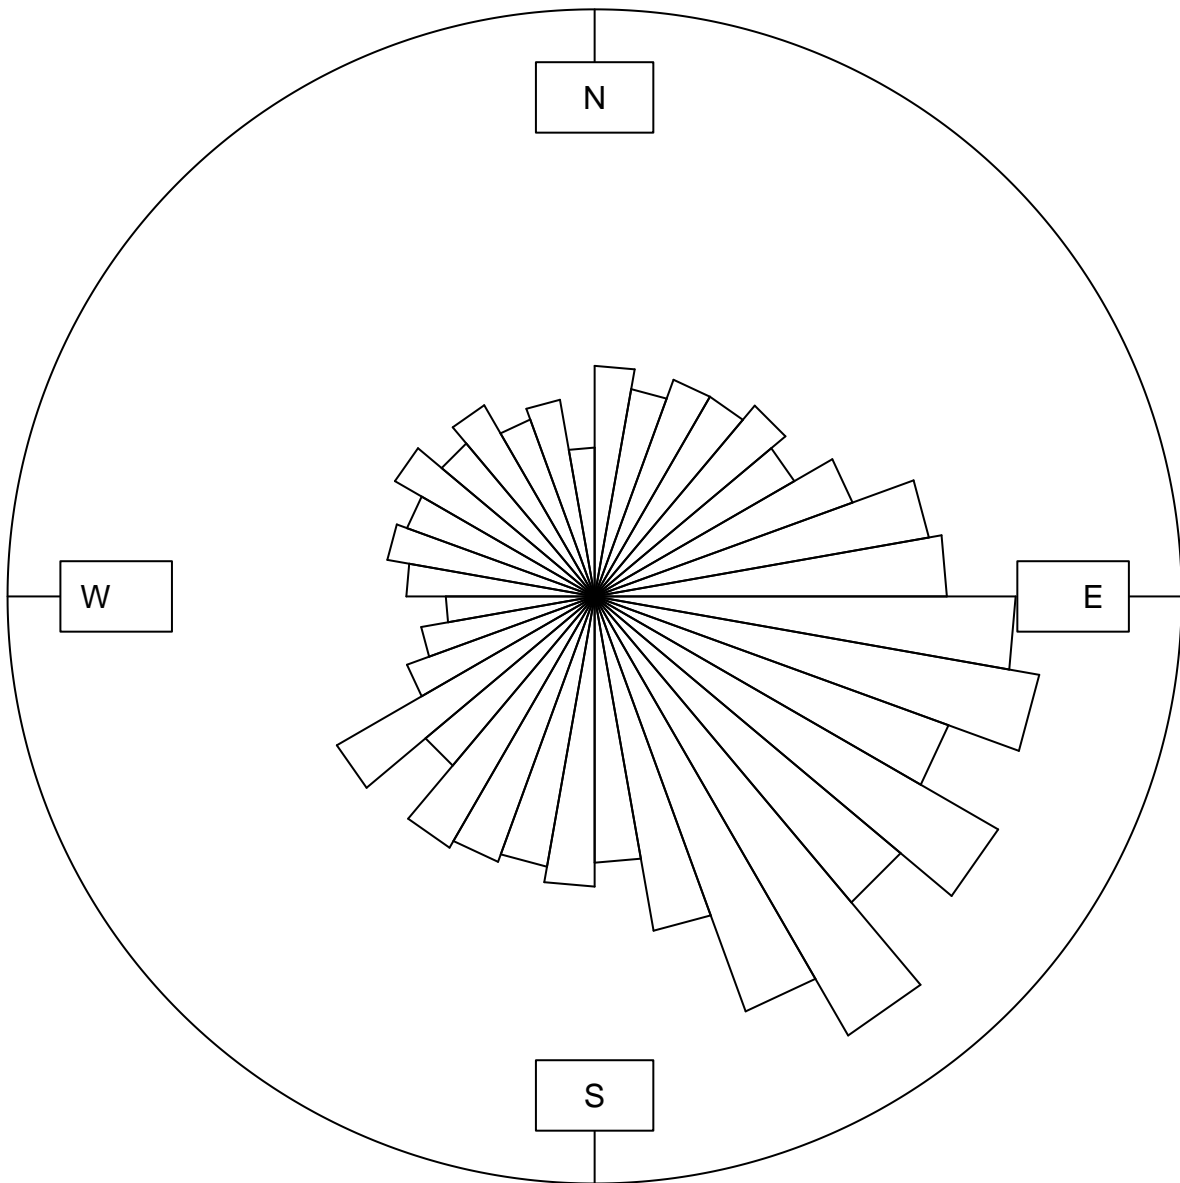



# bootstrap 377

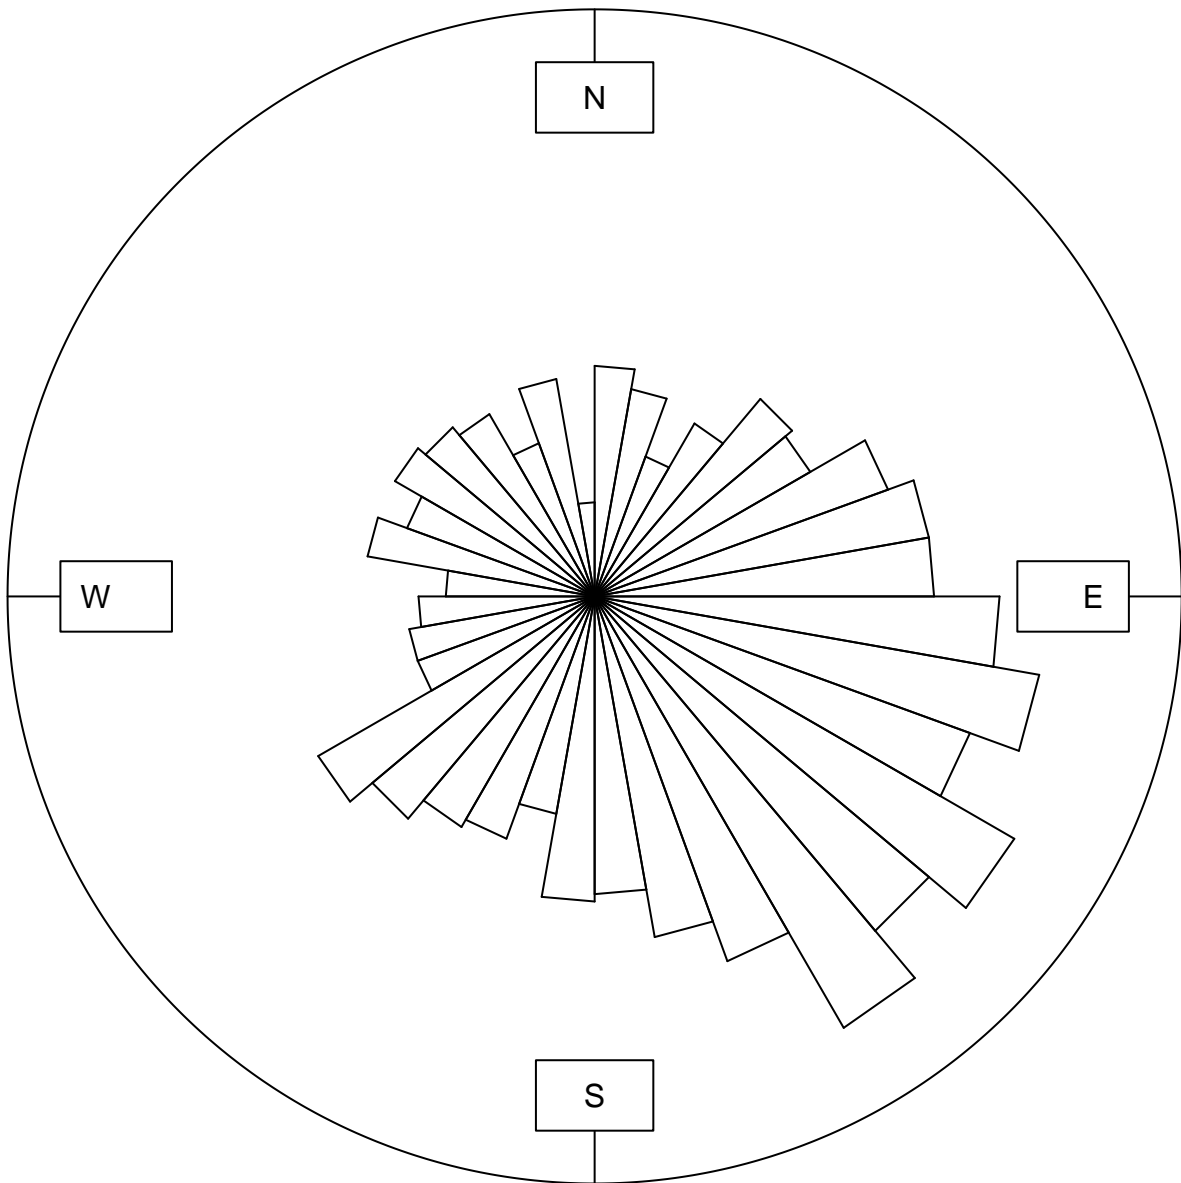

# bootstrap 378

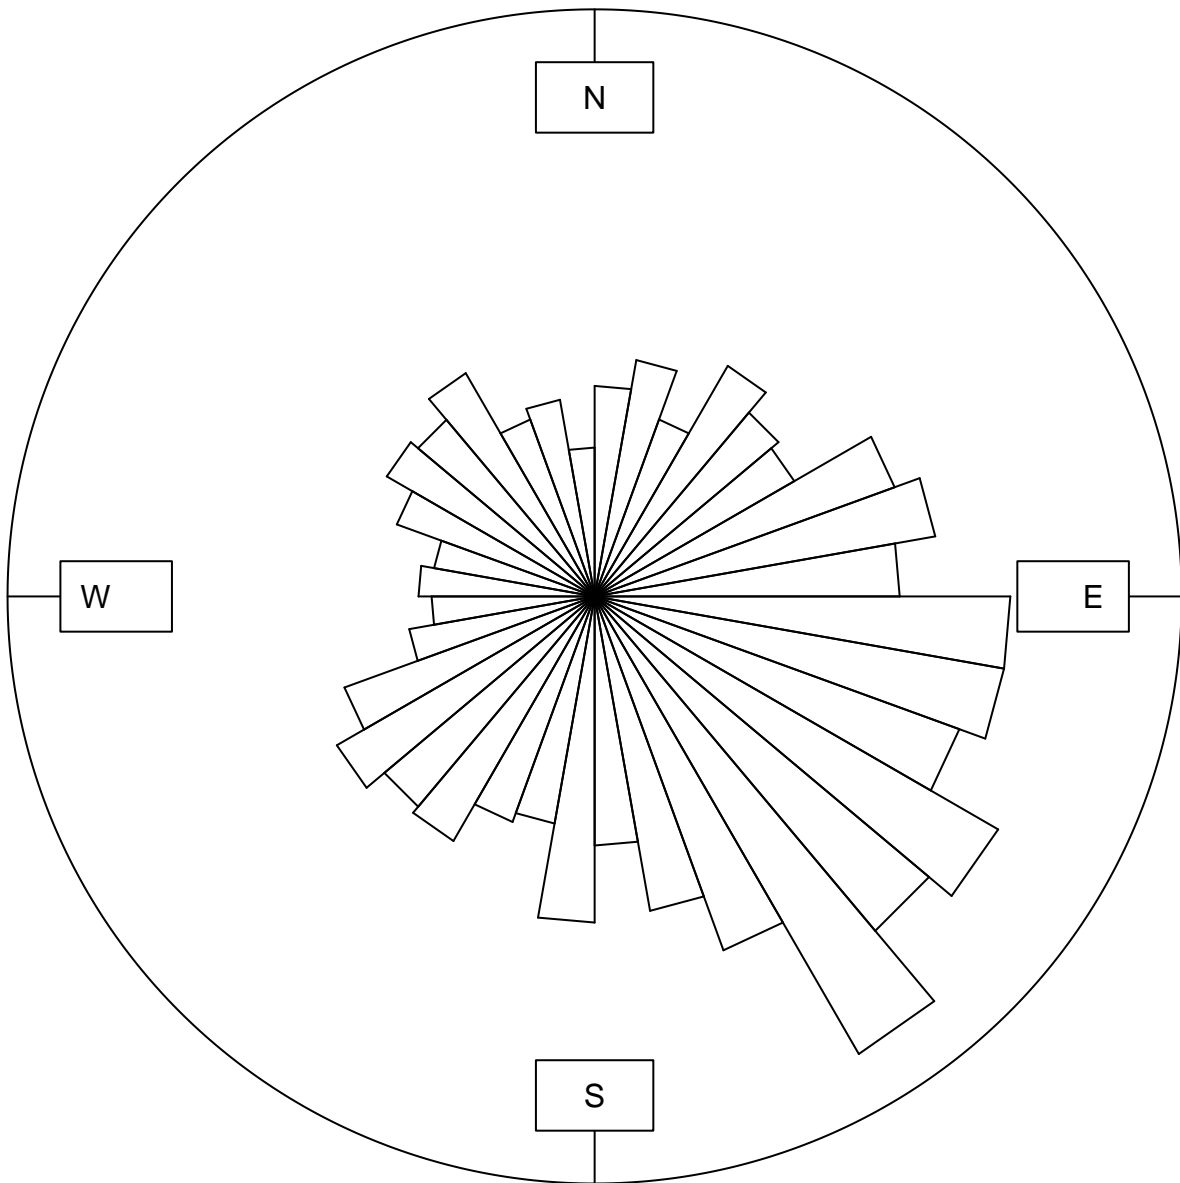

# bootstrap 379

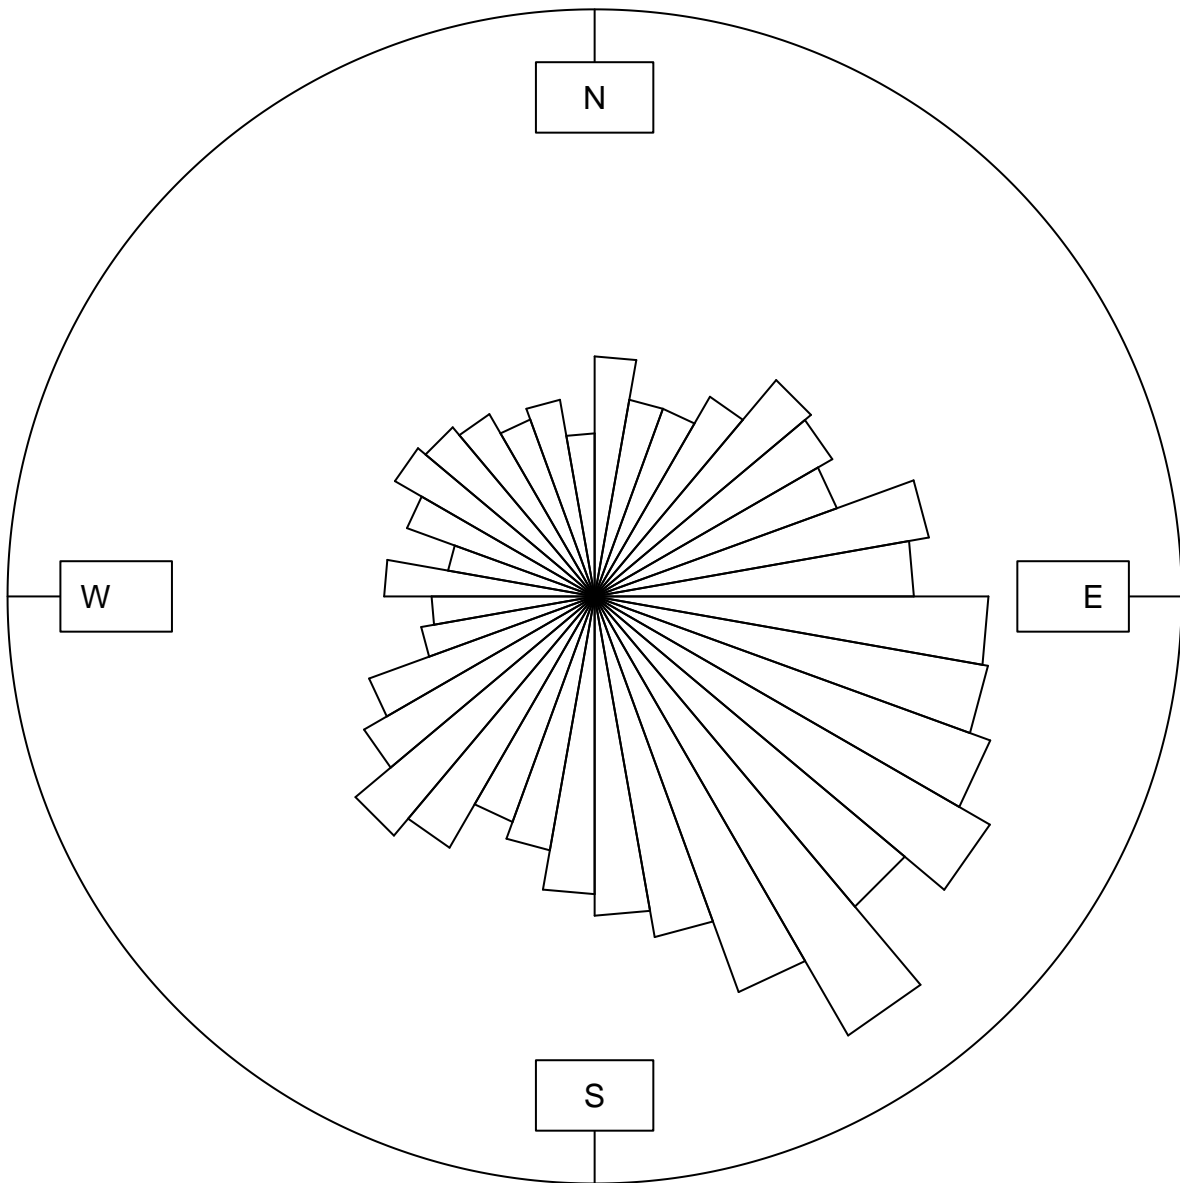

# bootstrap 380

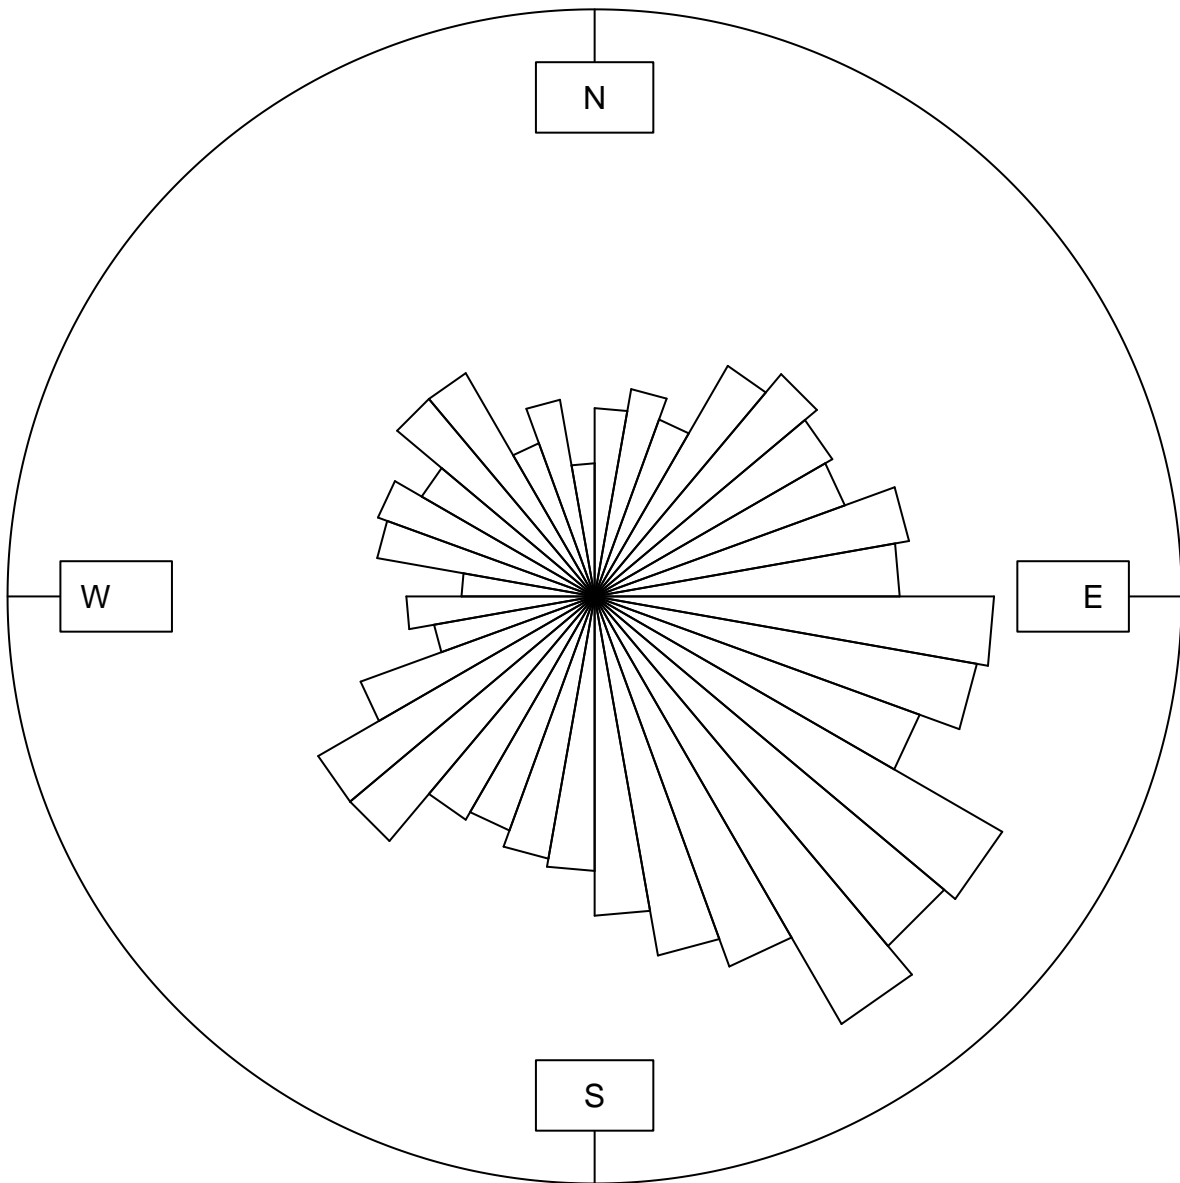

# bootstrap 381

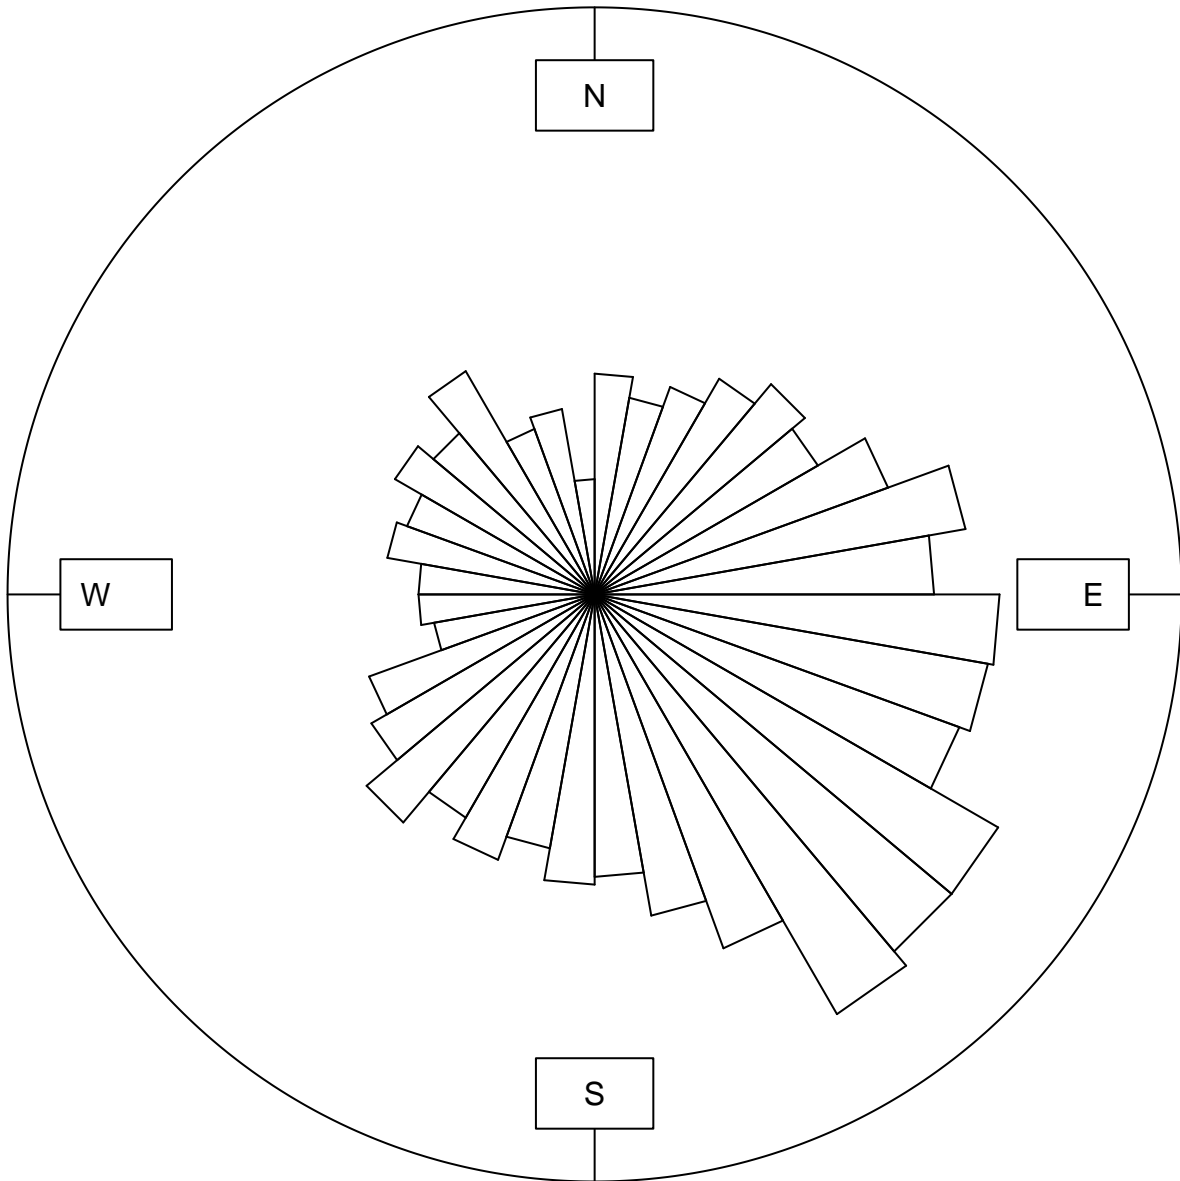

# bootstrap 382

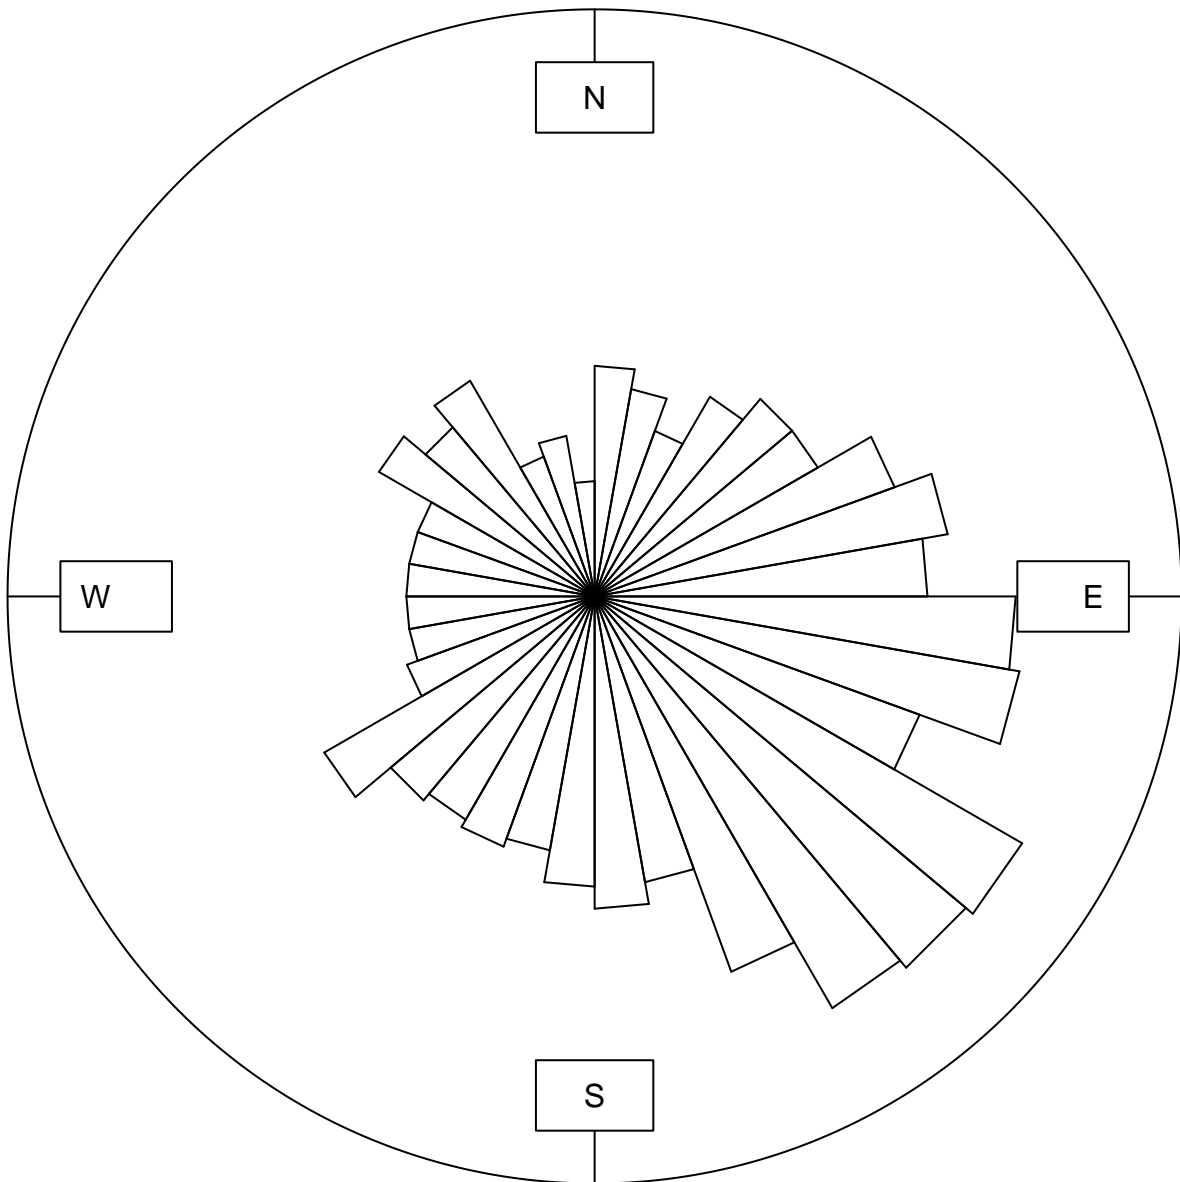

# bootstrap 383

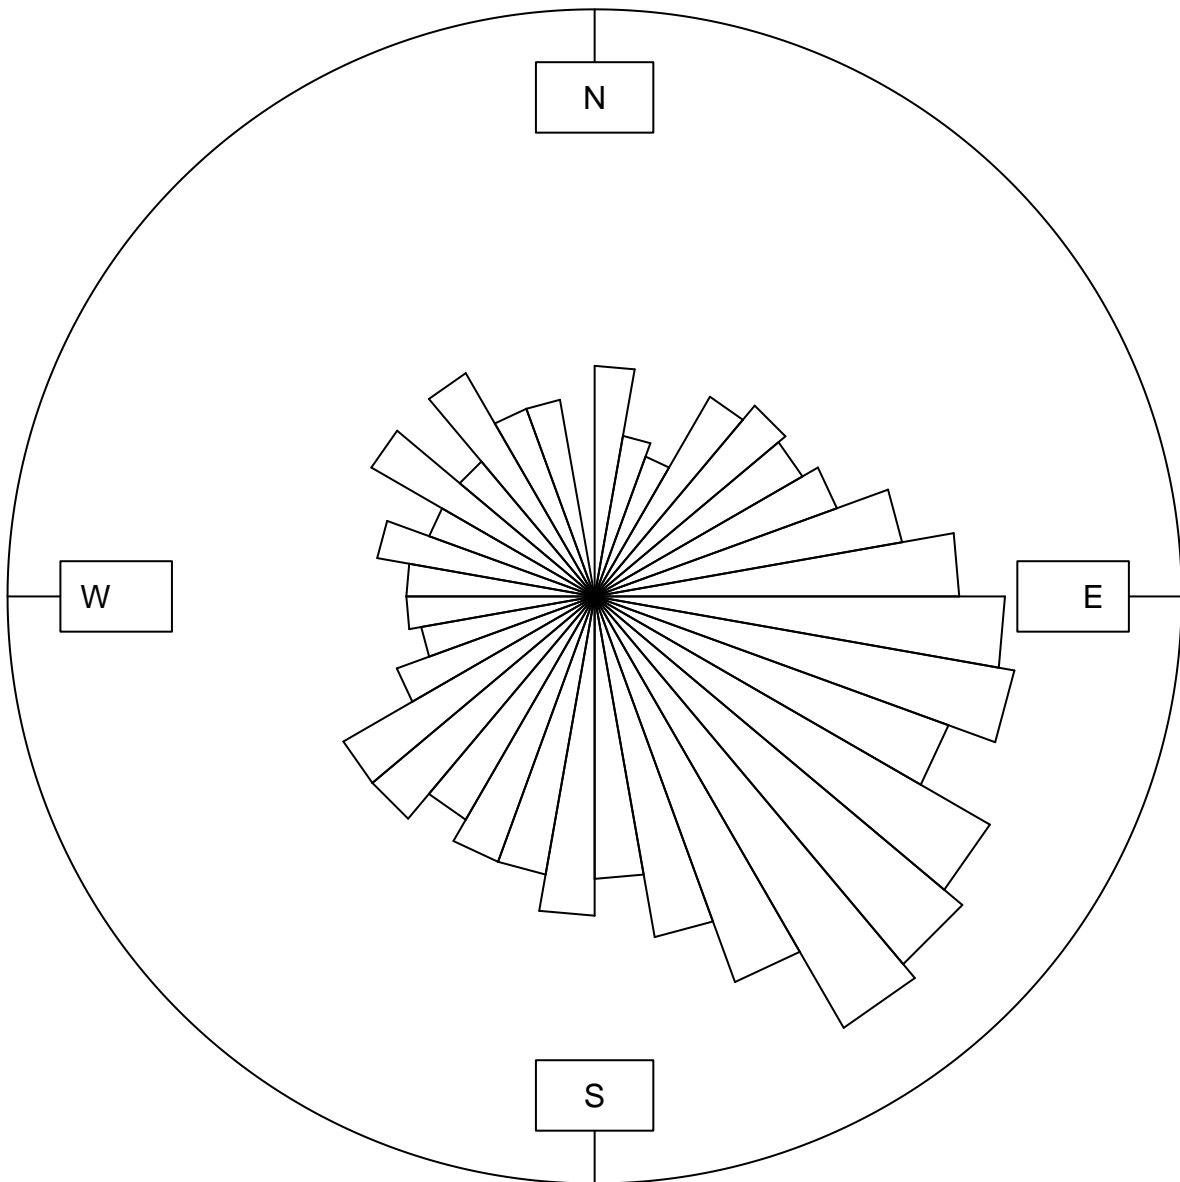

# bootstrap 384

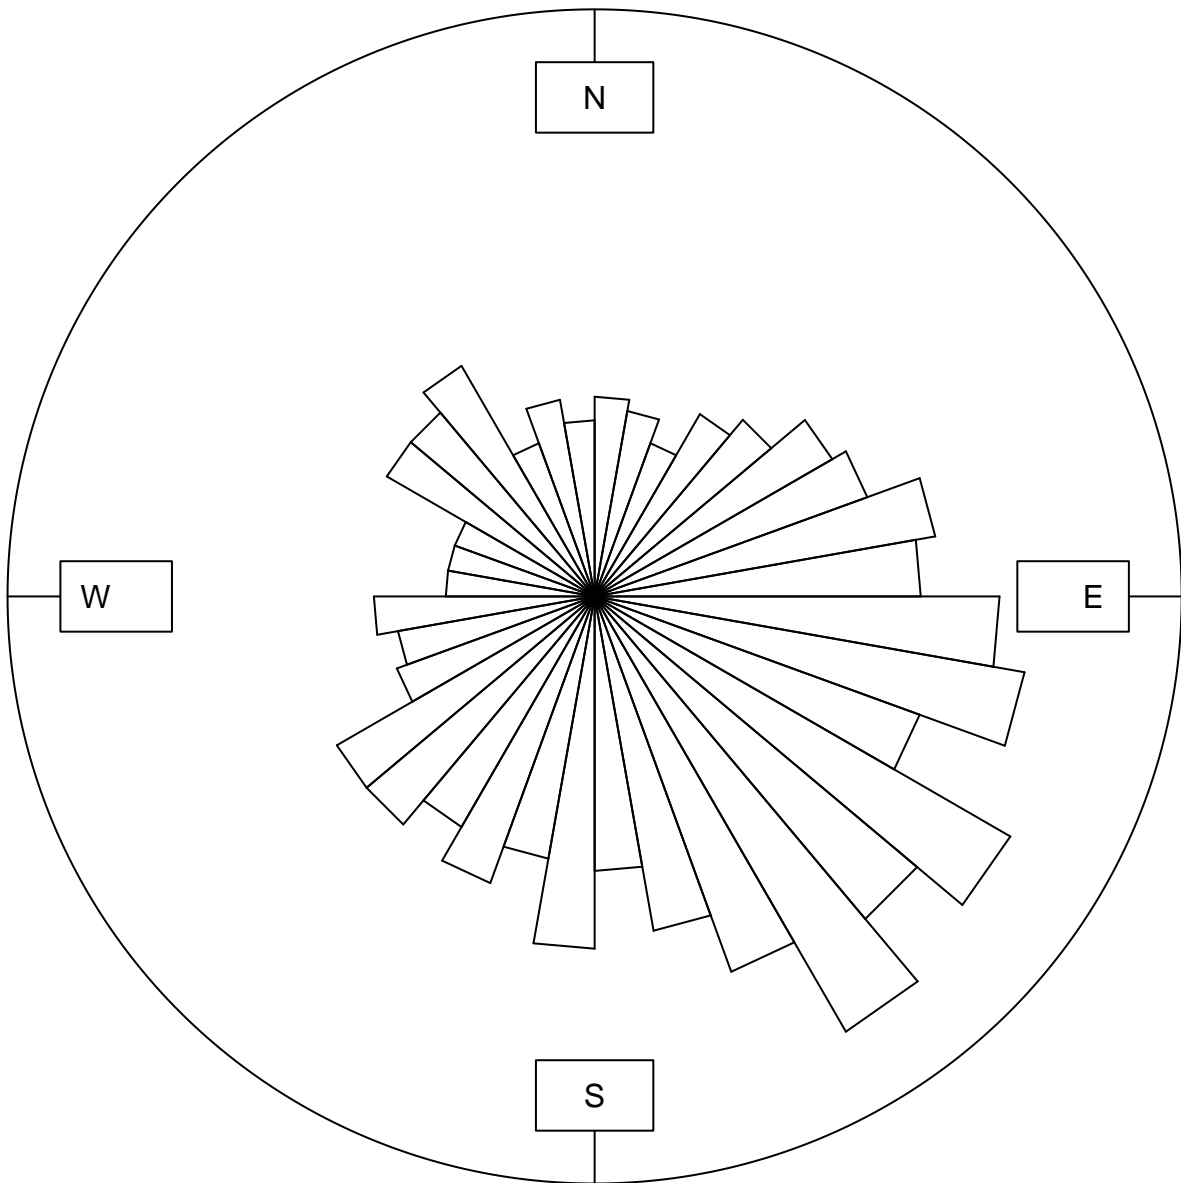



# bootstrap 385

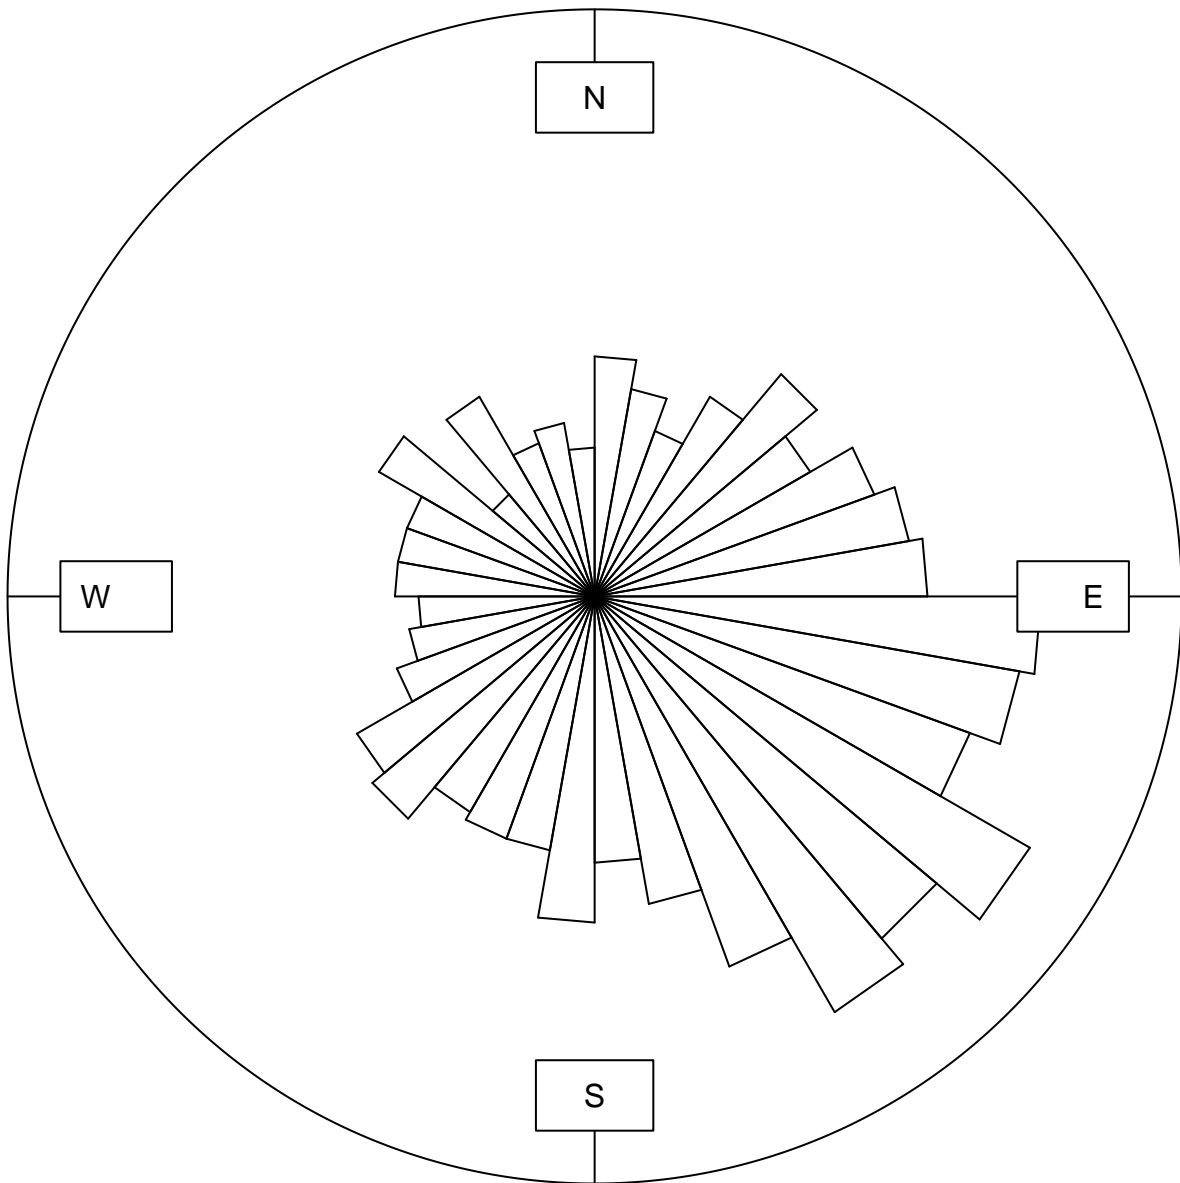

# bootstrap 386

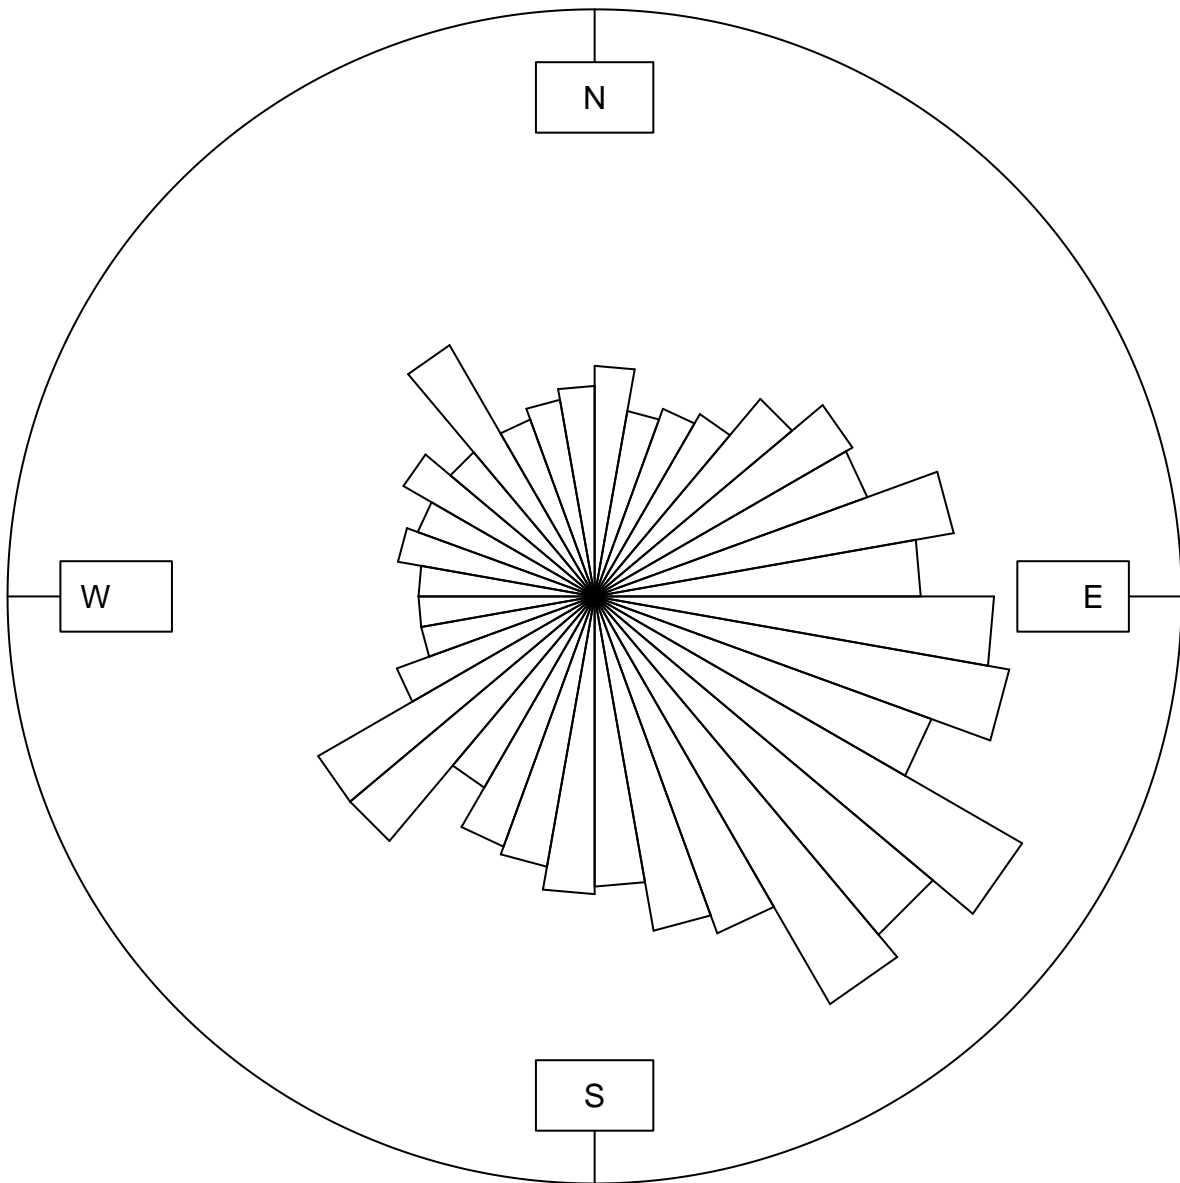

# bootstrap 387

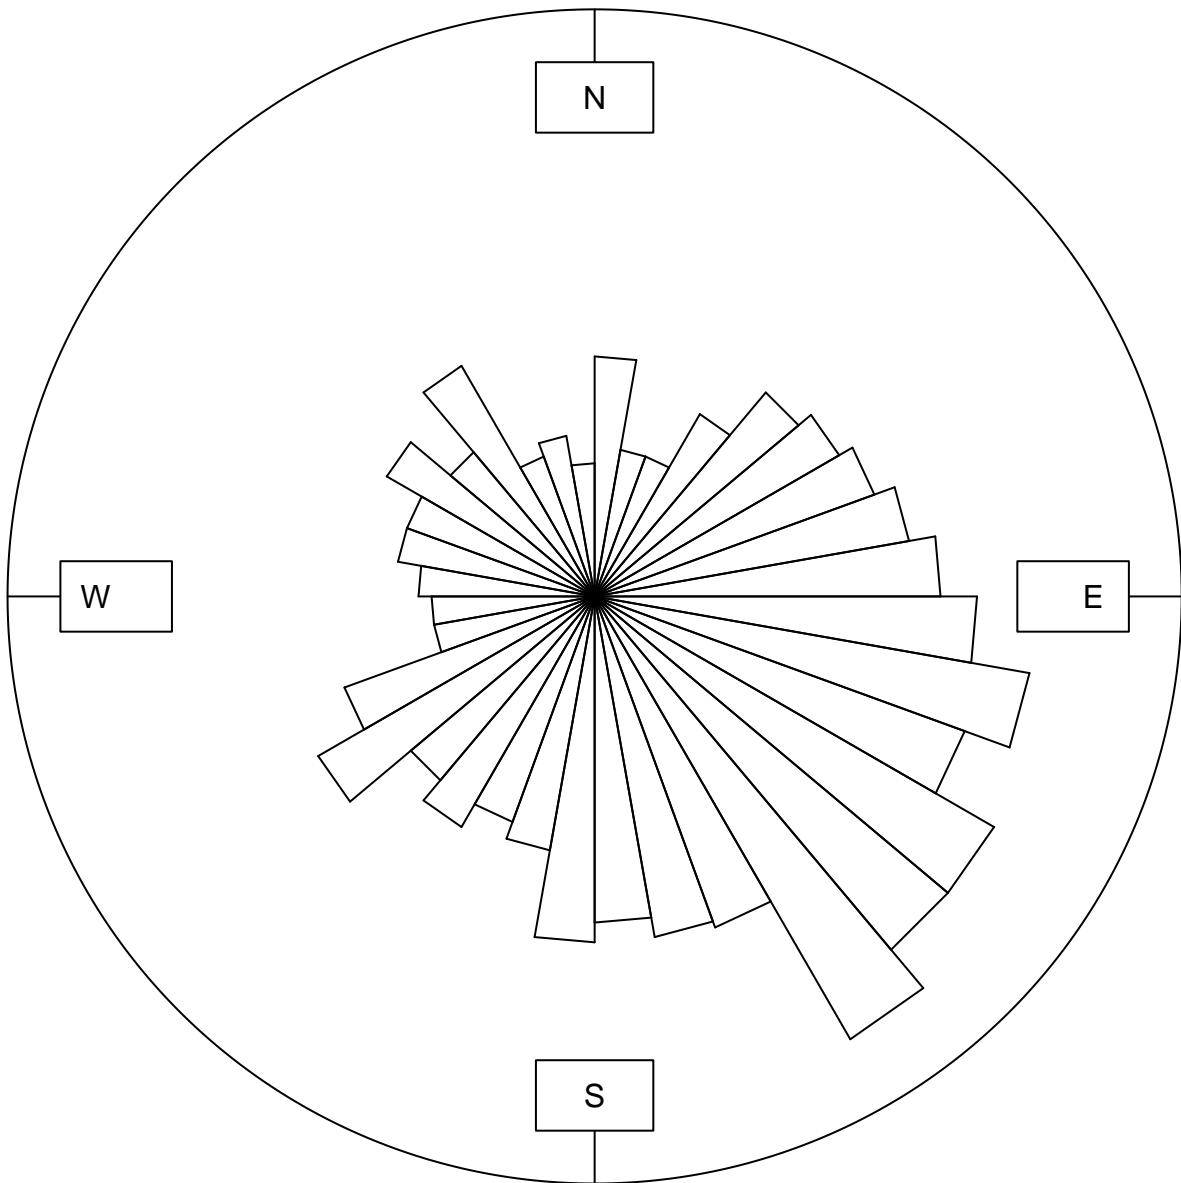

**bootstrap 388**

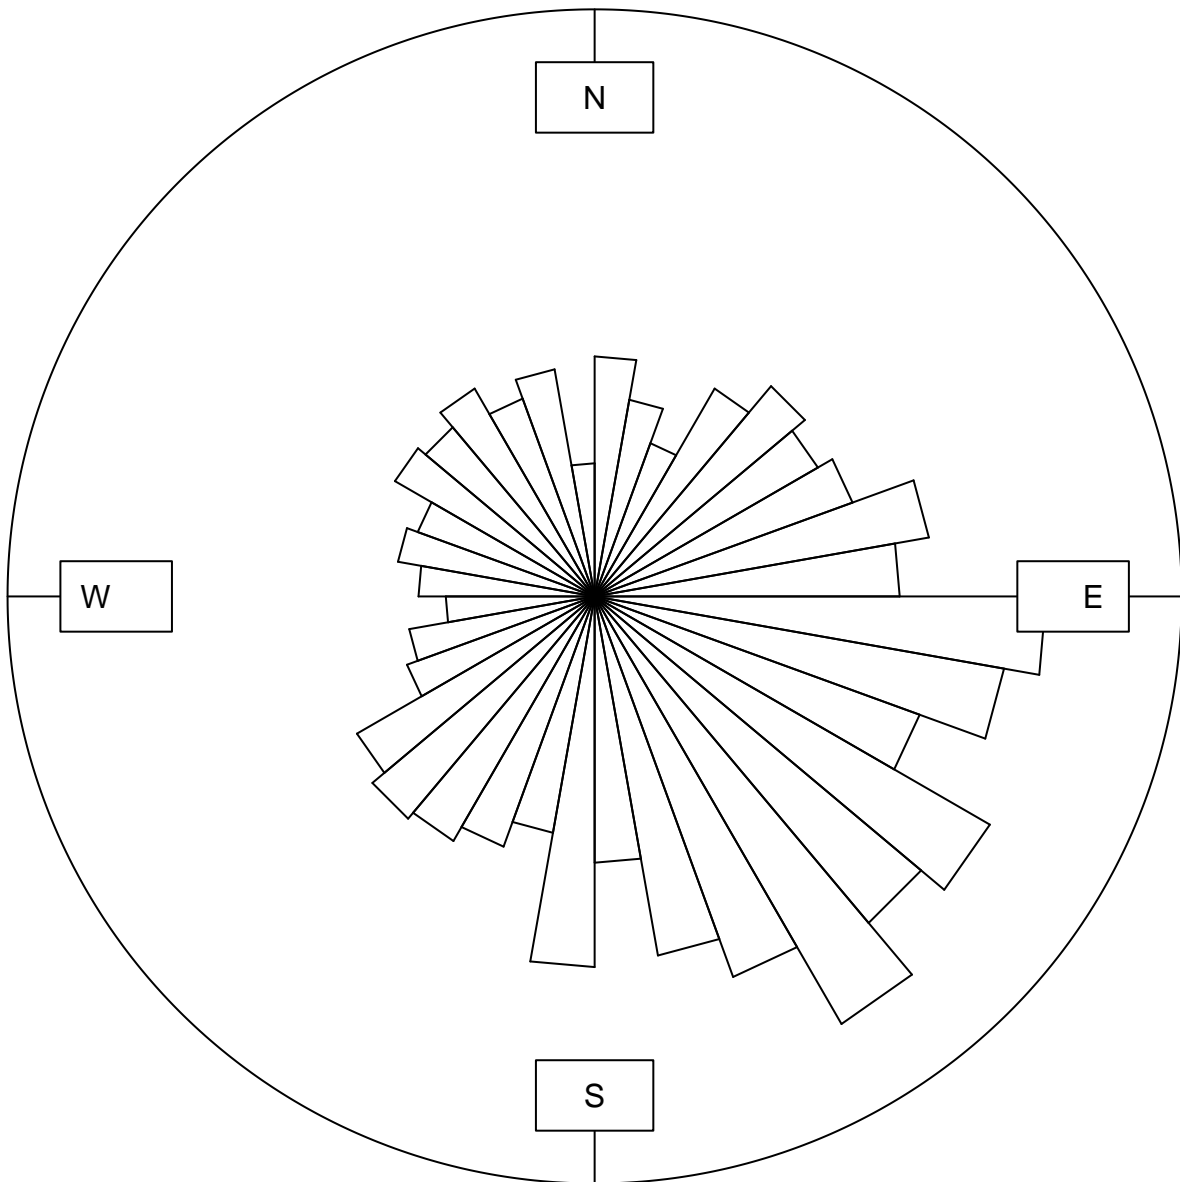

# bootstrap 389

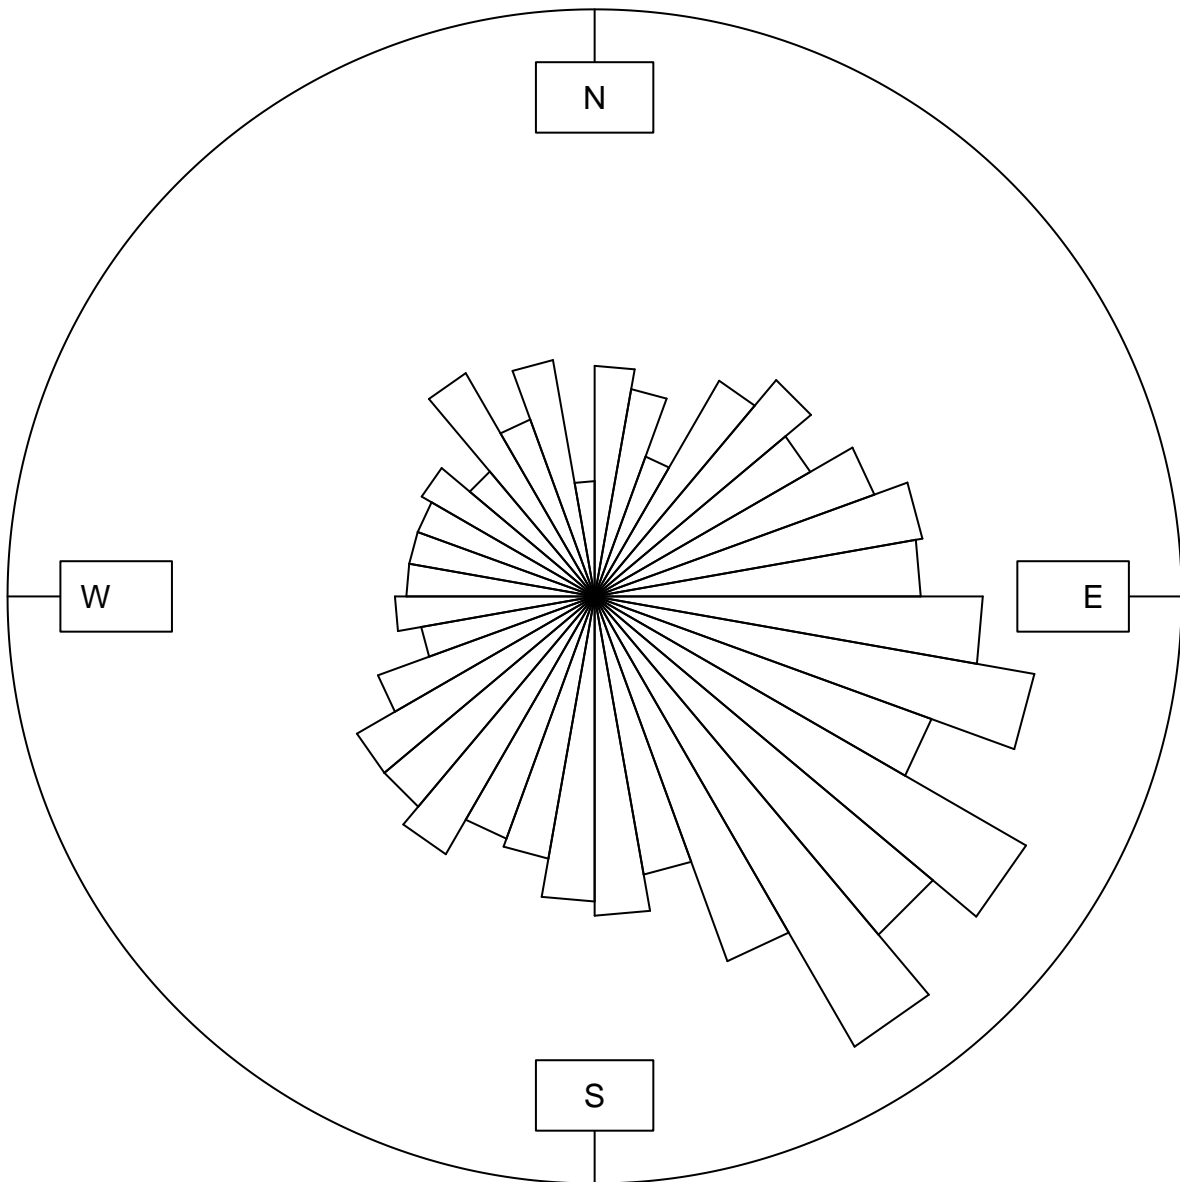

# bootstrap 390

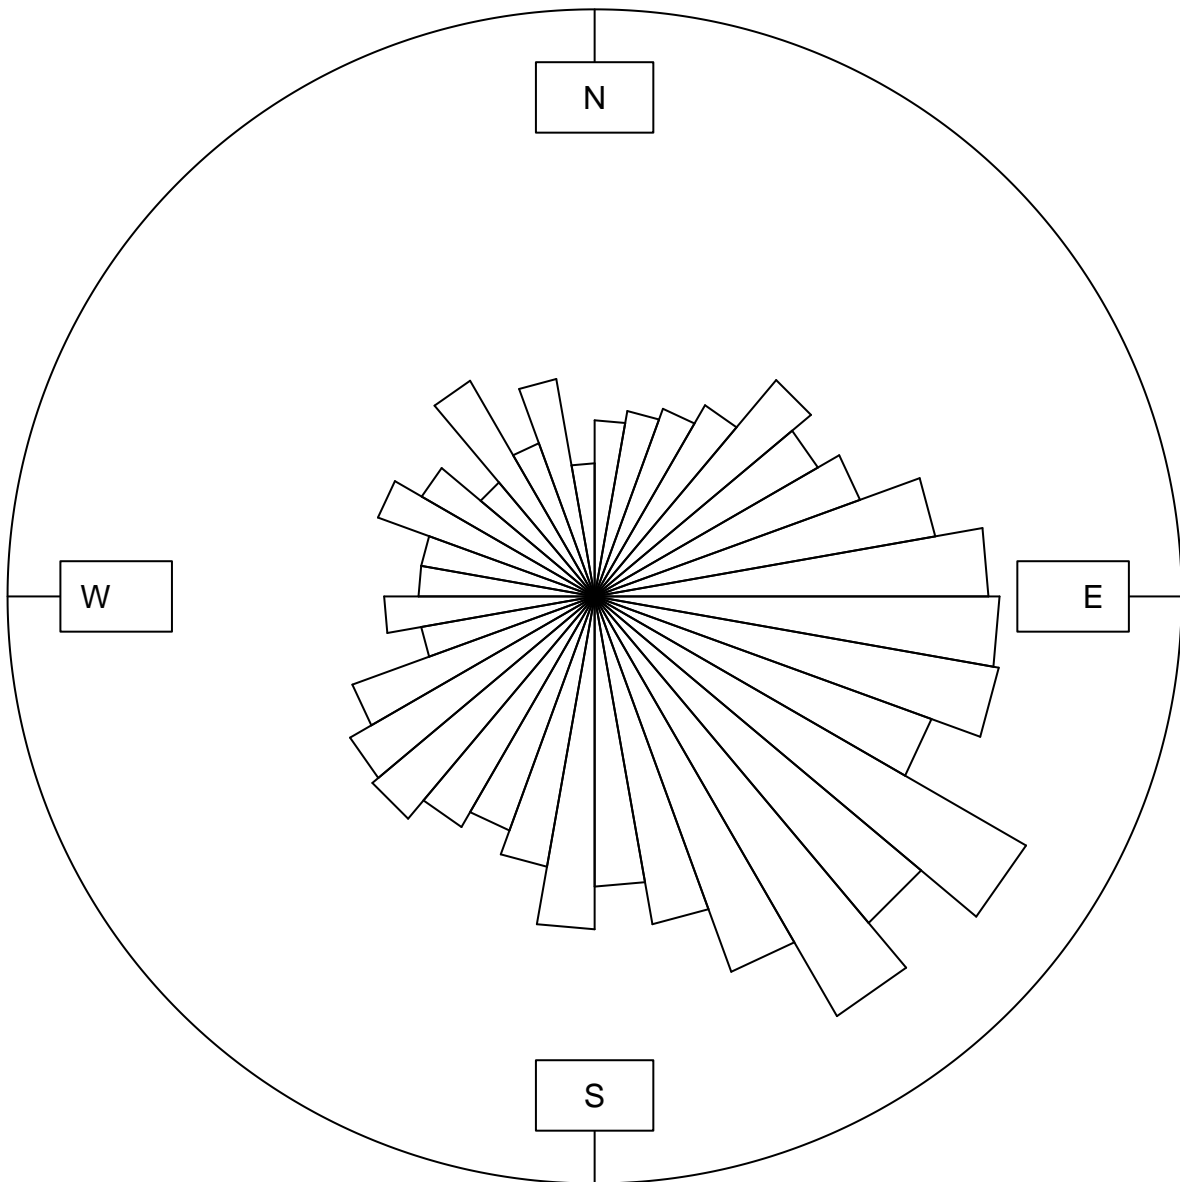

# bootstrap 391

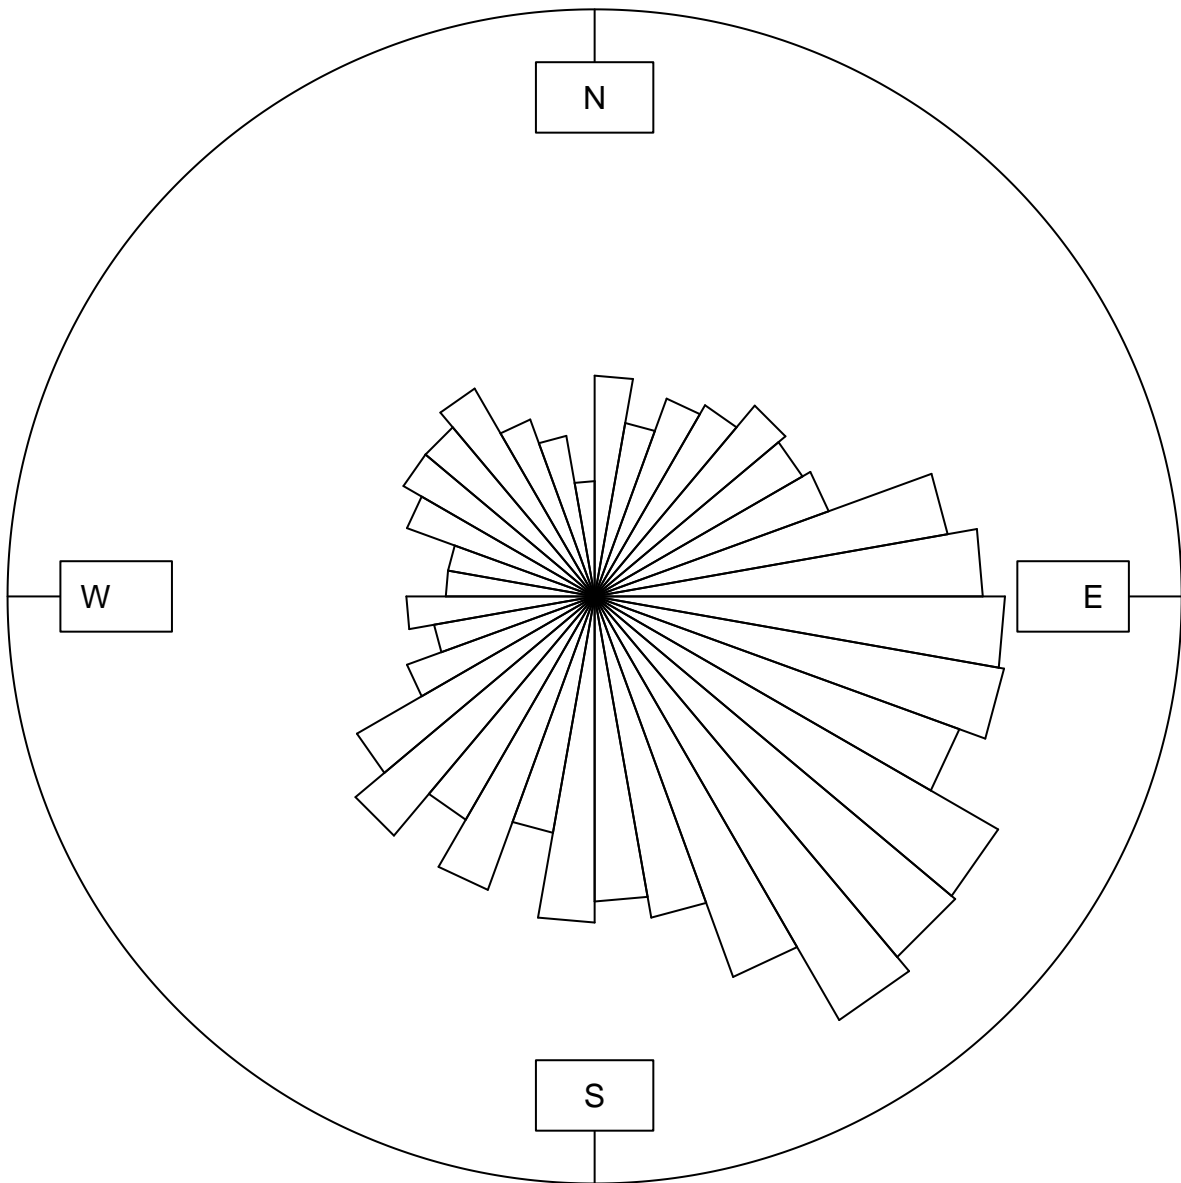

# bootstrap 392

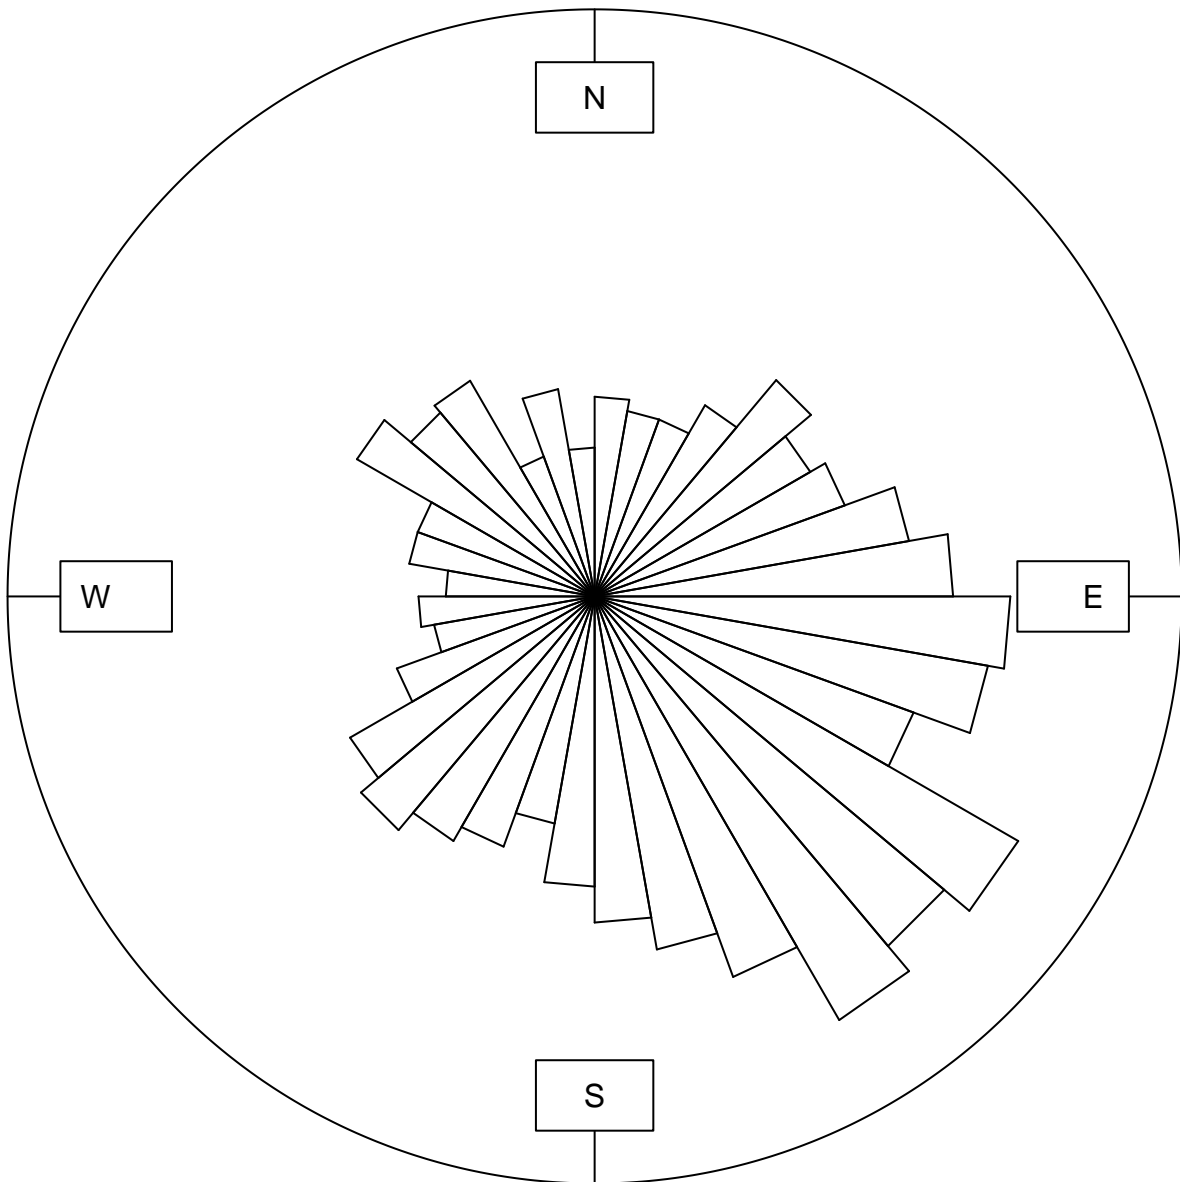



**bootstrap 393**

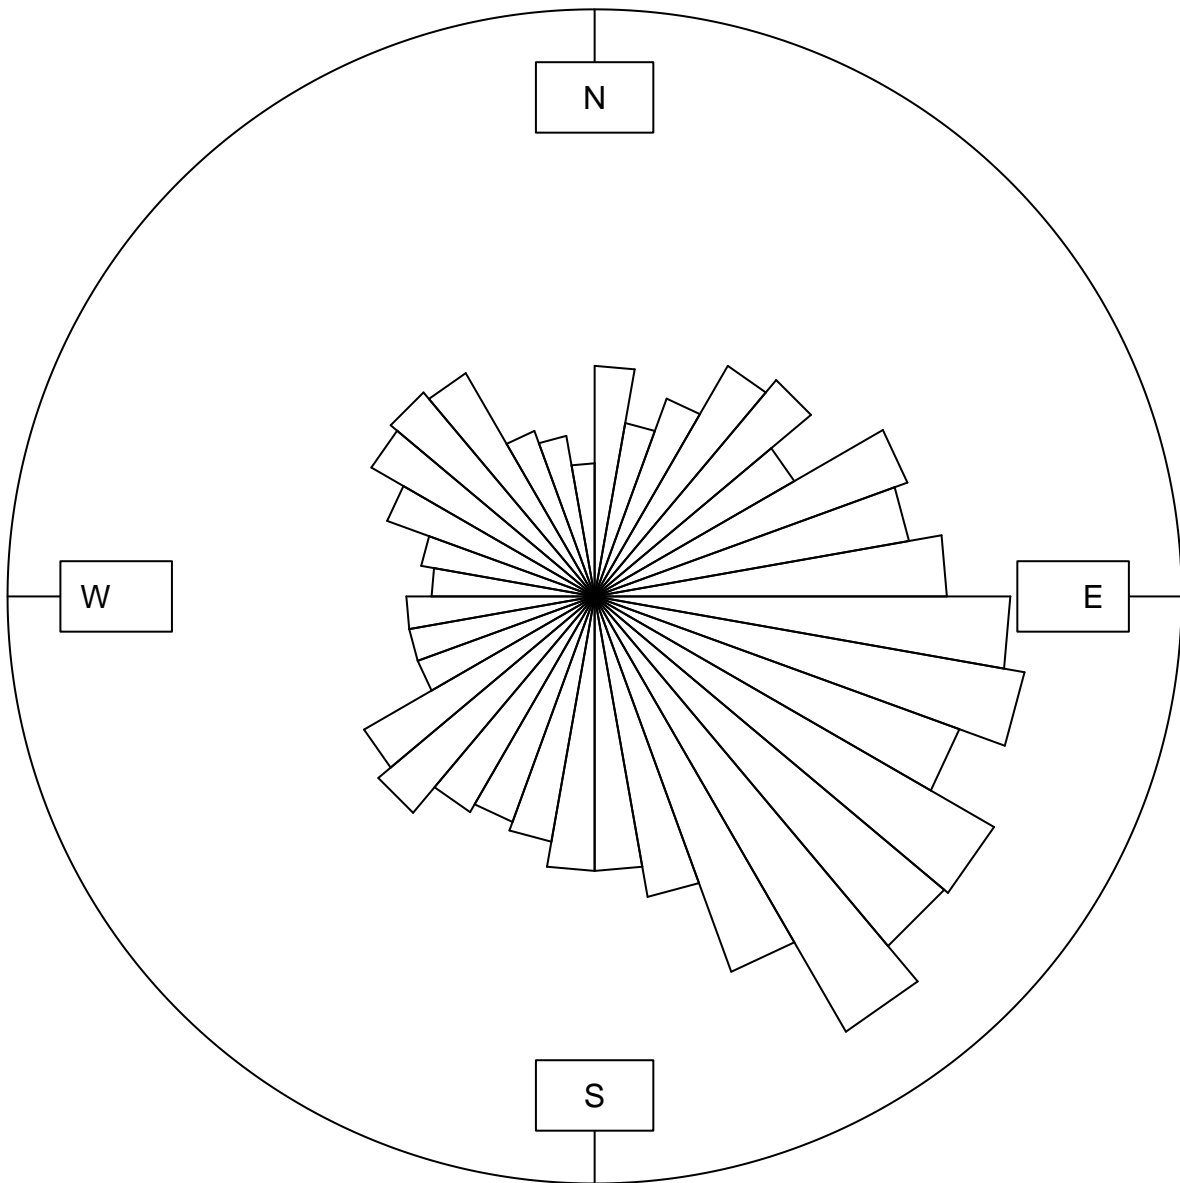

# bootstrap 394

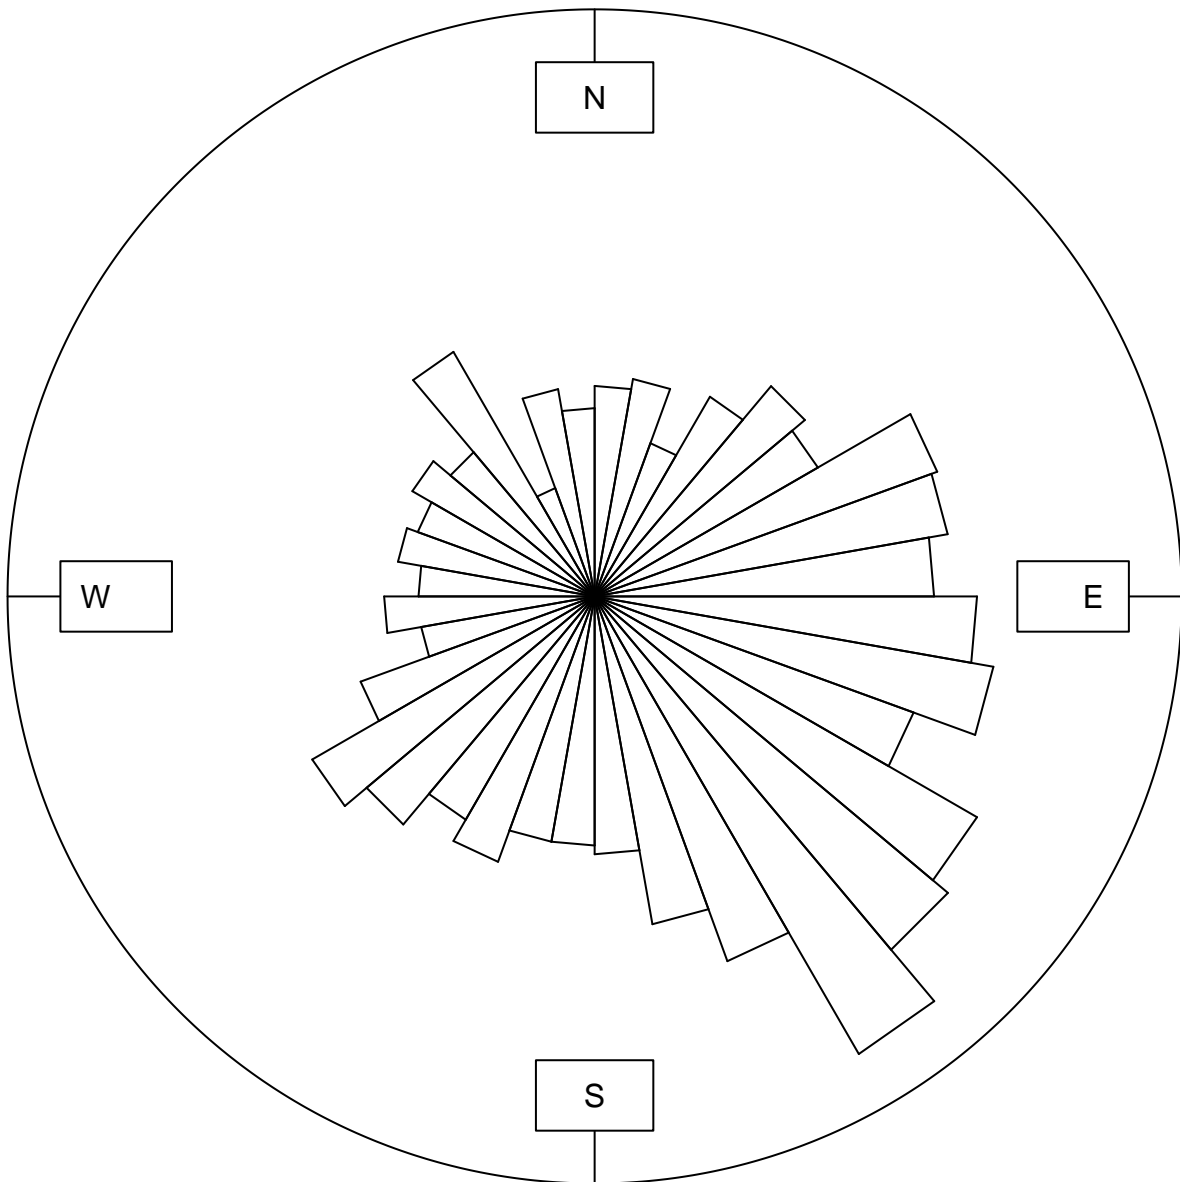

# bootstrap 395

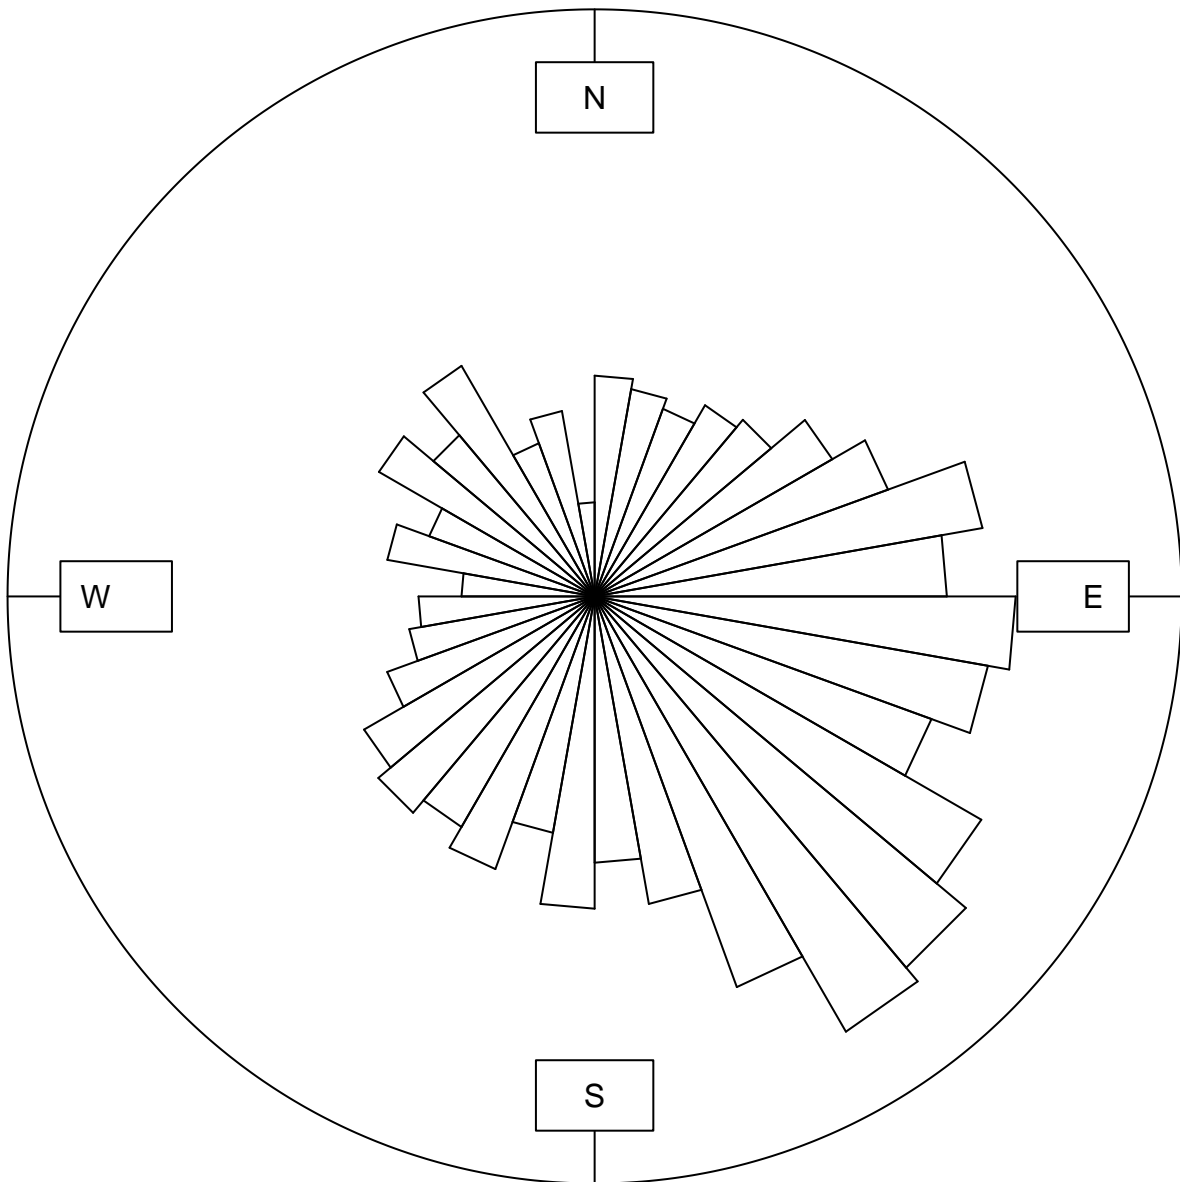

**bootstrap 396**

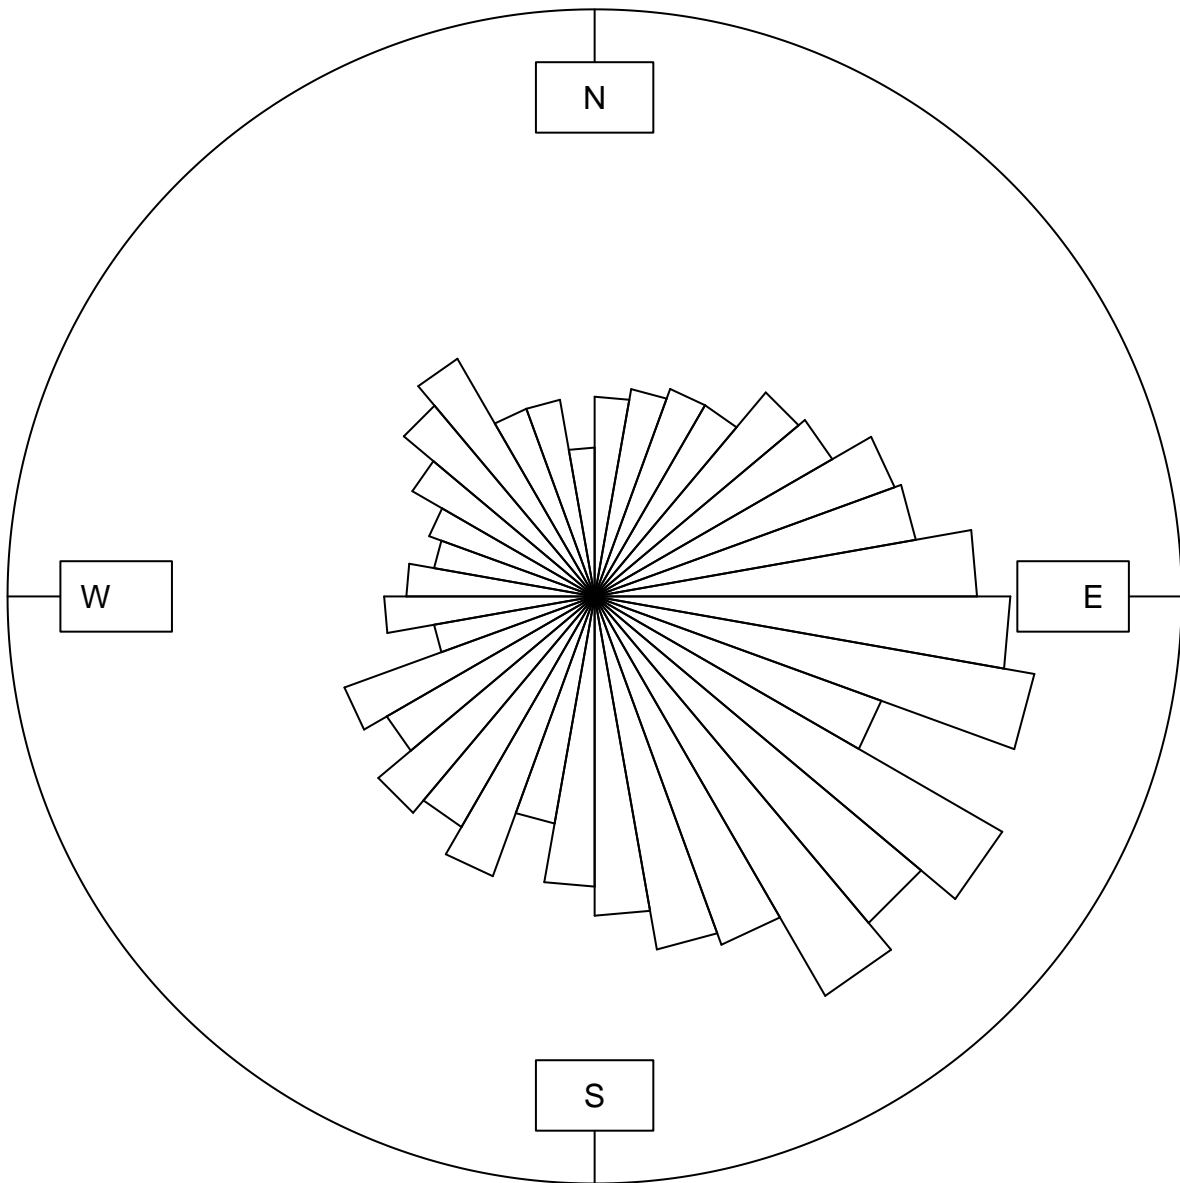

# bootstrap 397

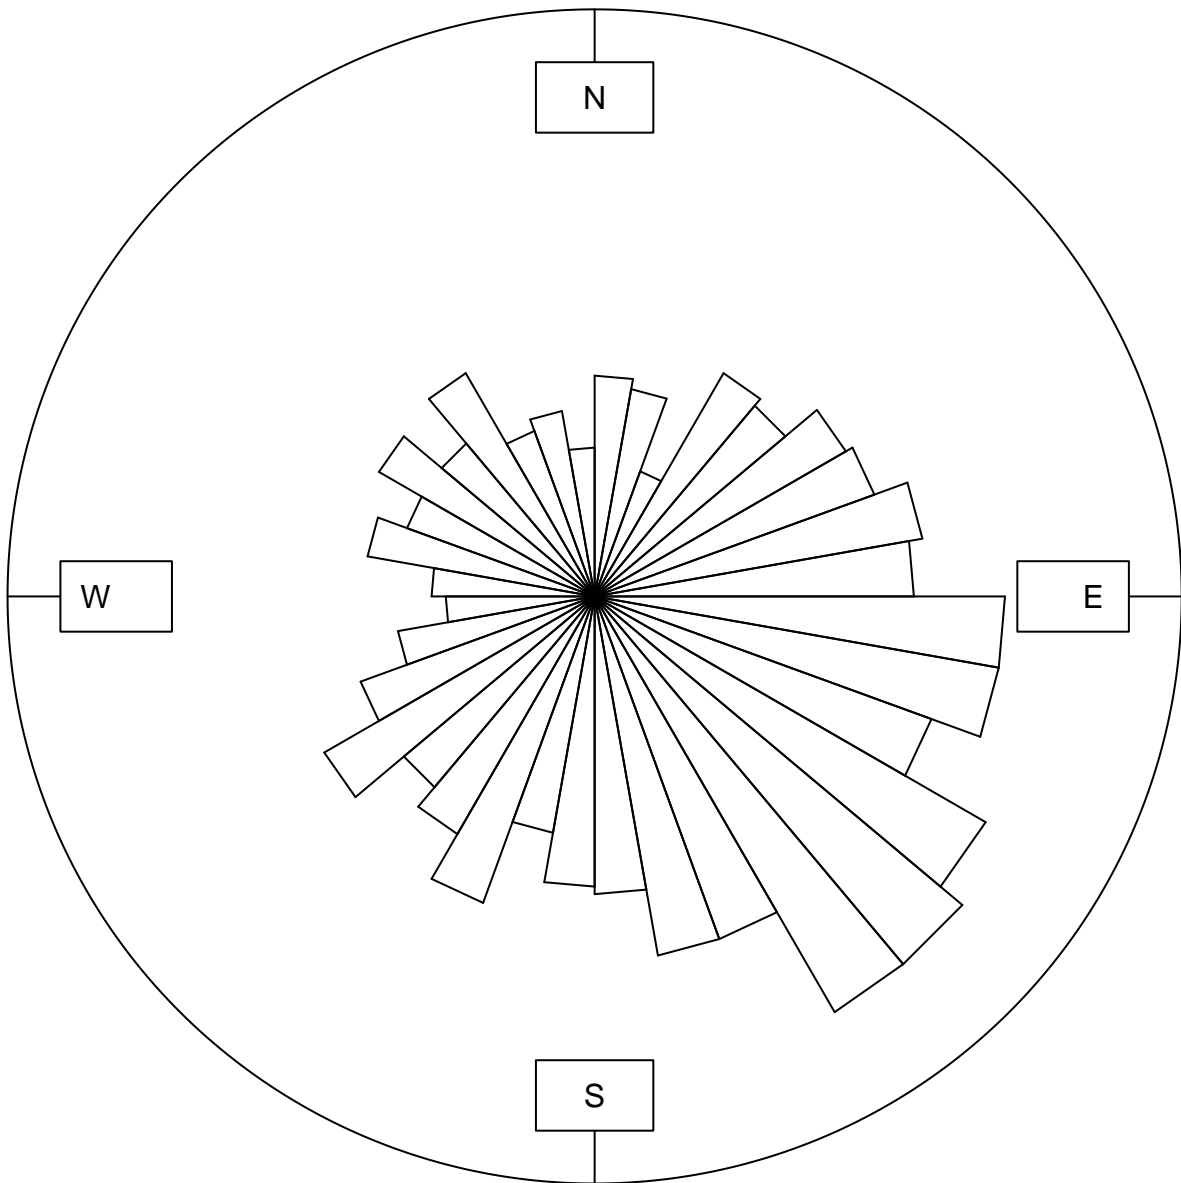

# bootstrap 398

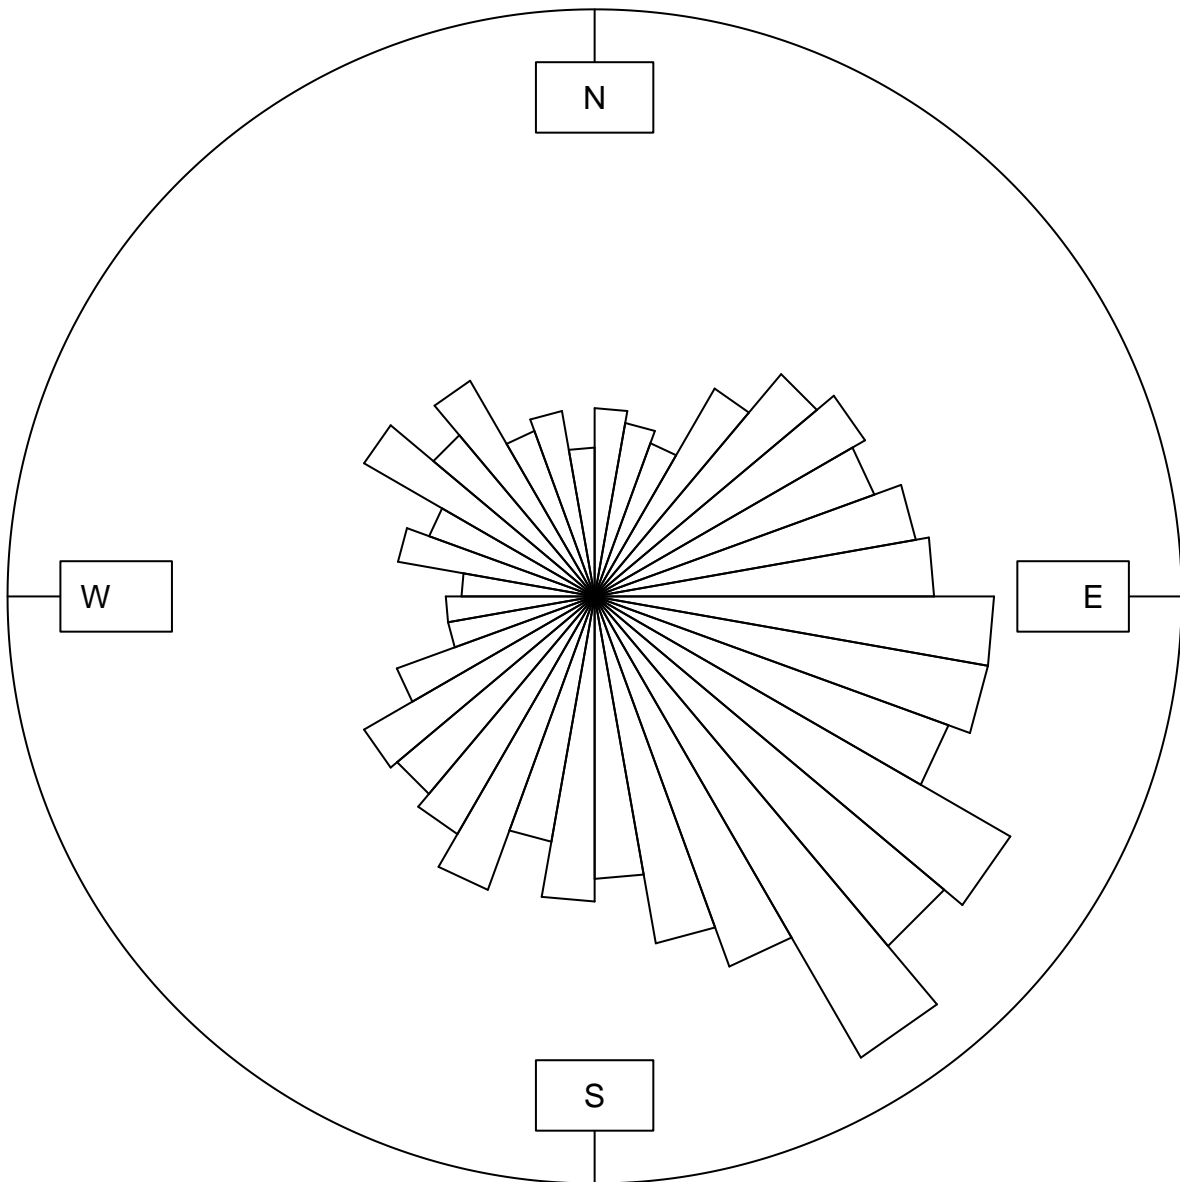

# bootstrap 399

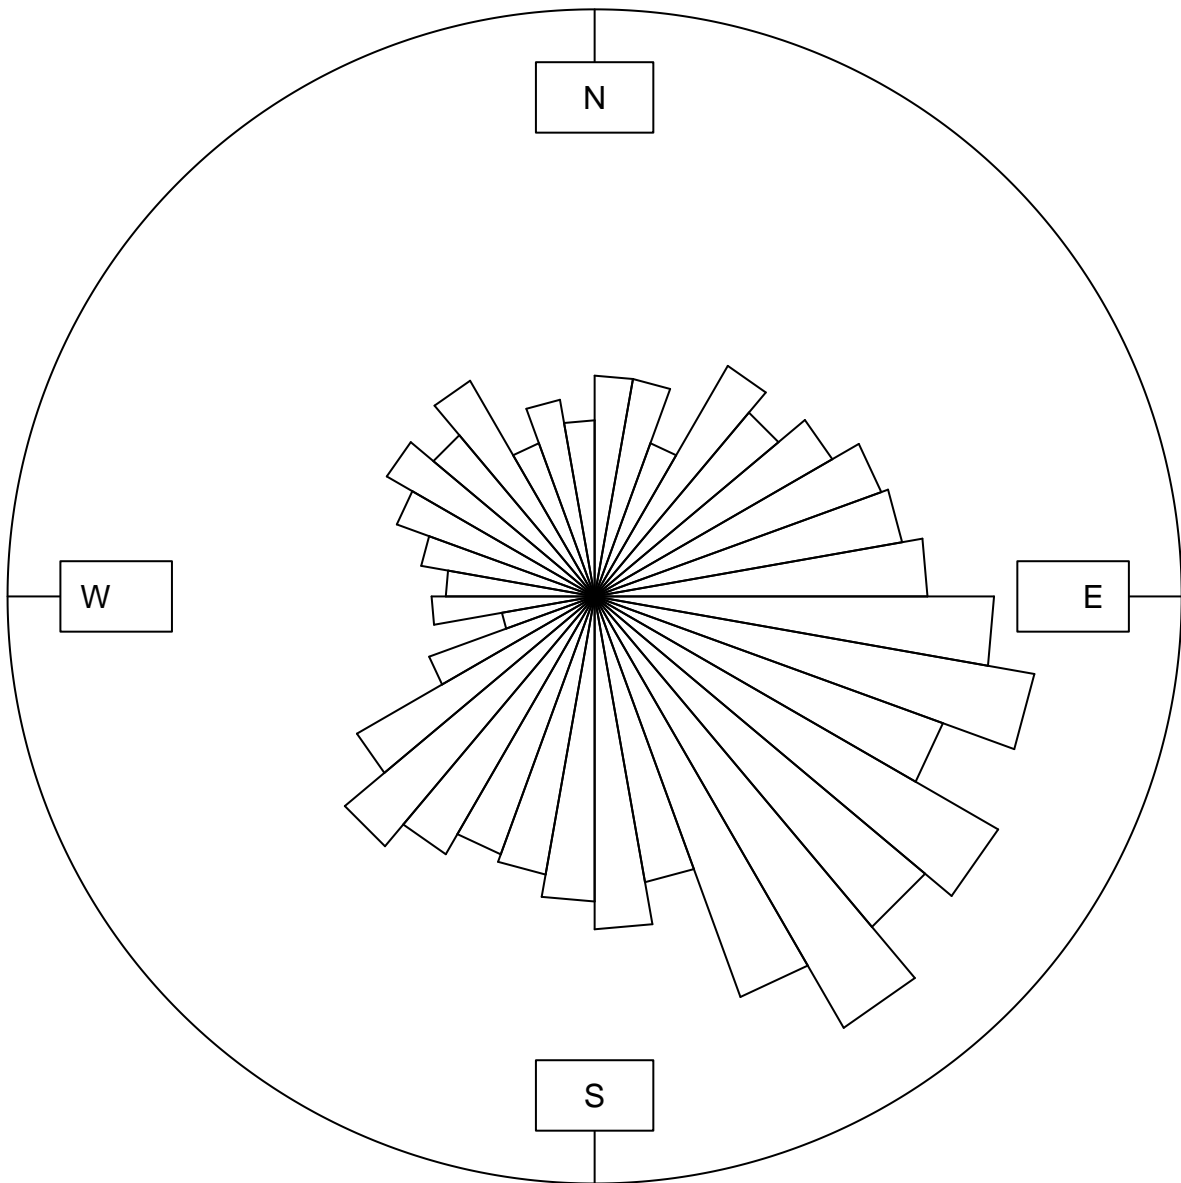

# bootstrap 400

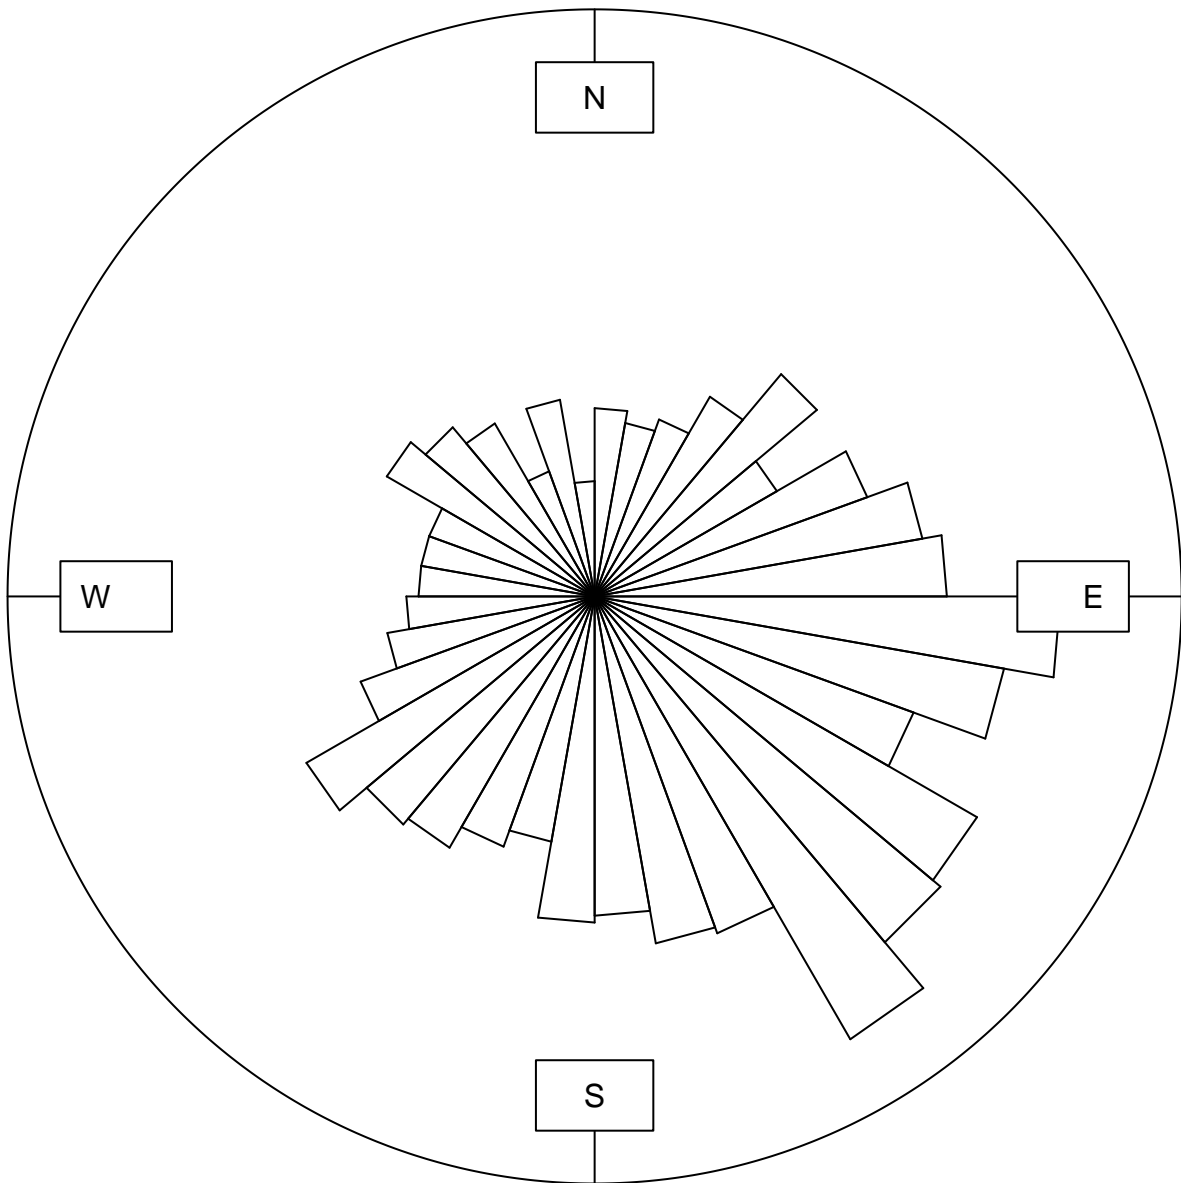



# bootstrap 401

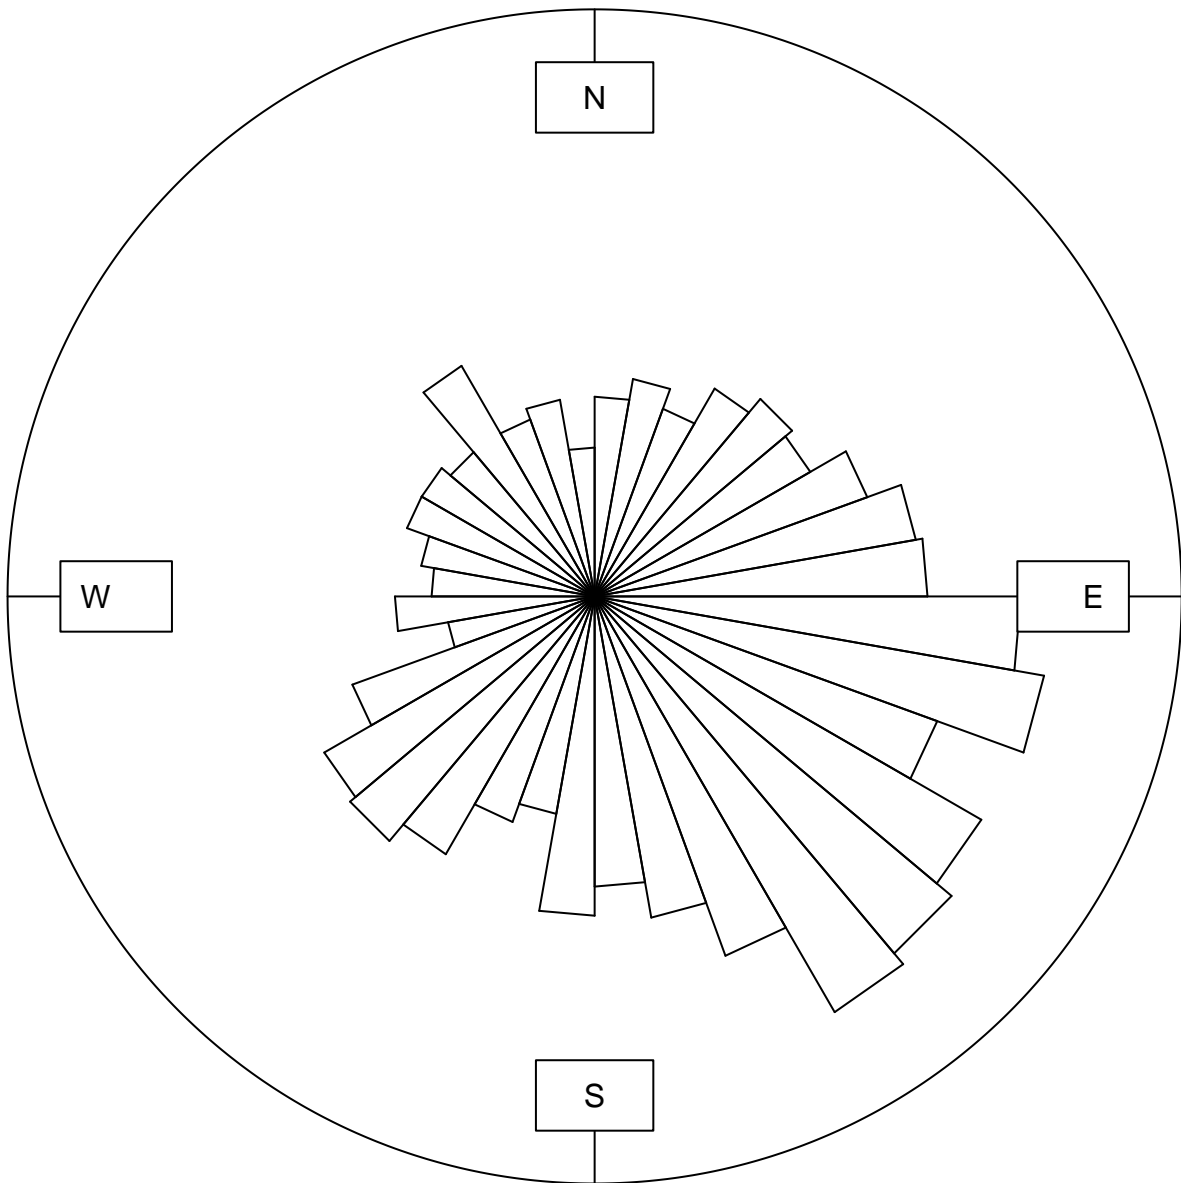

# bootstrap 402

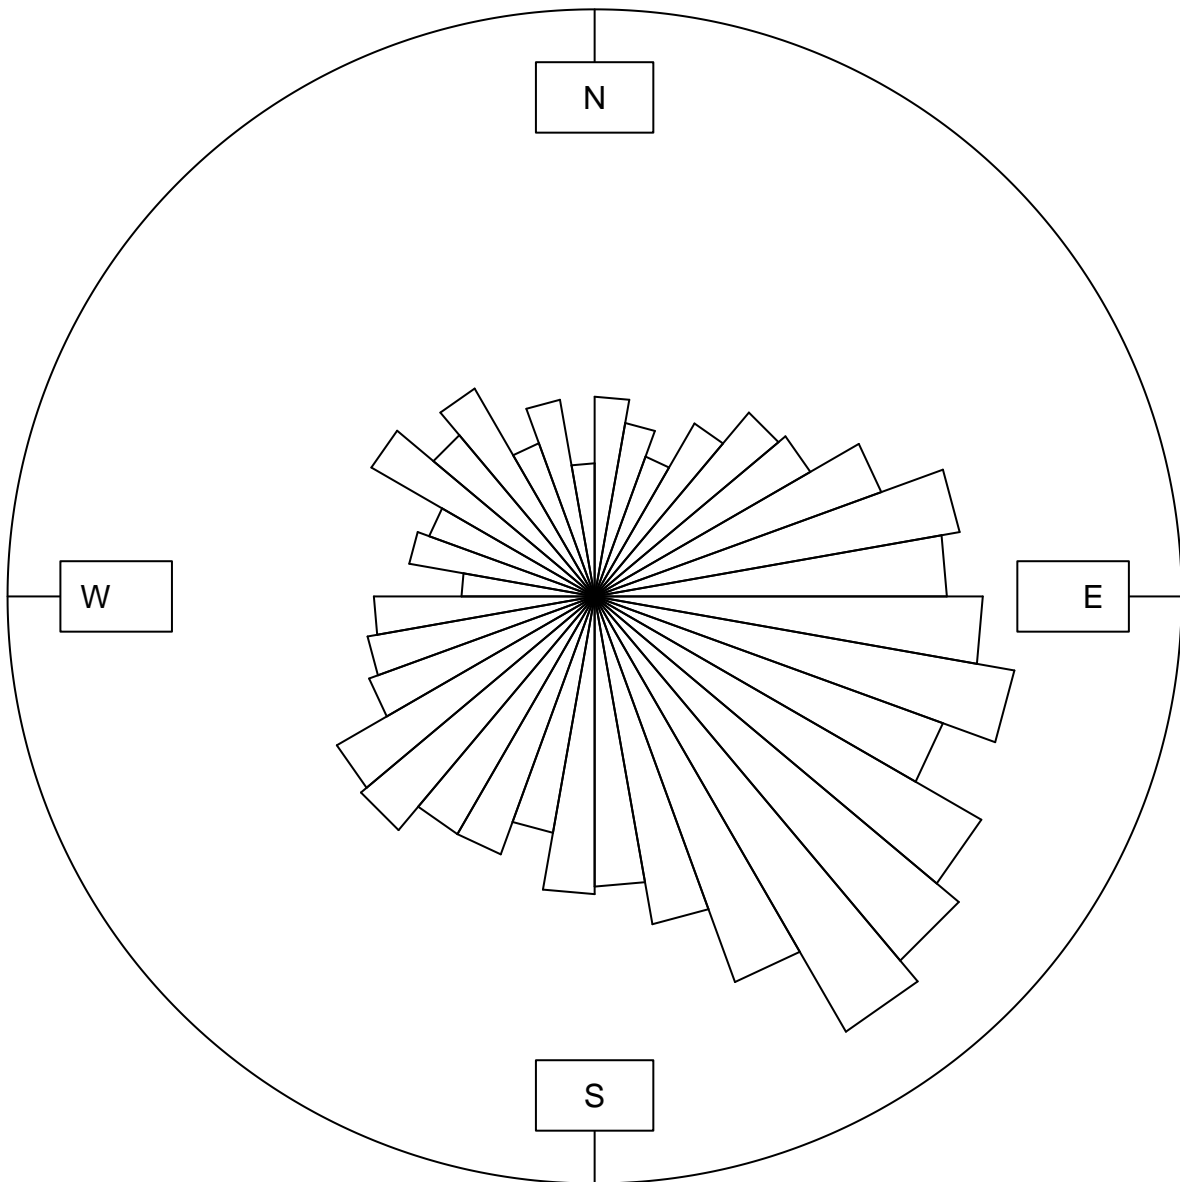

# bootstrap 403

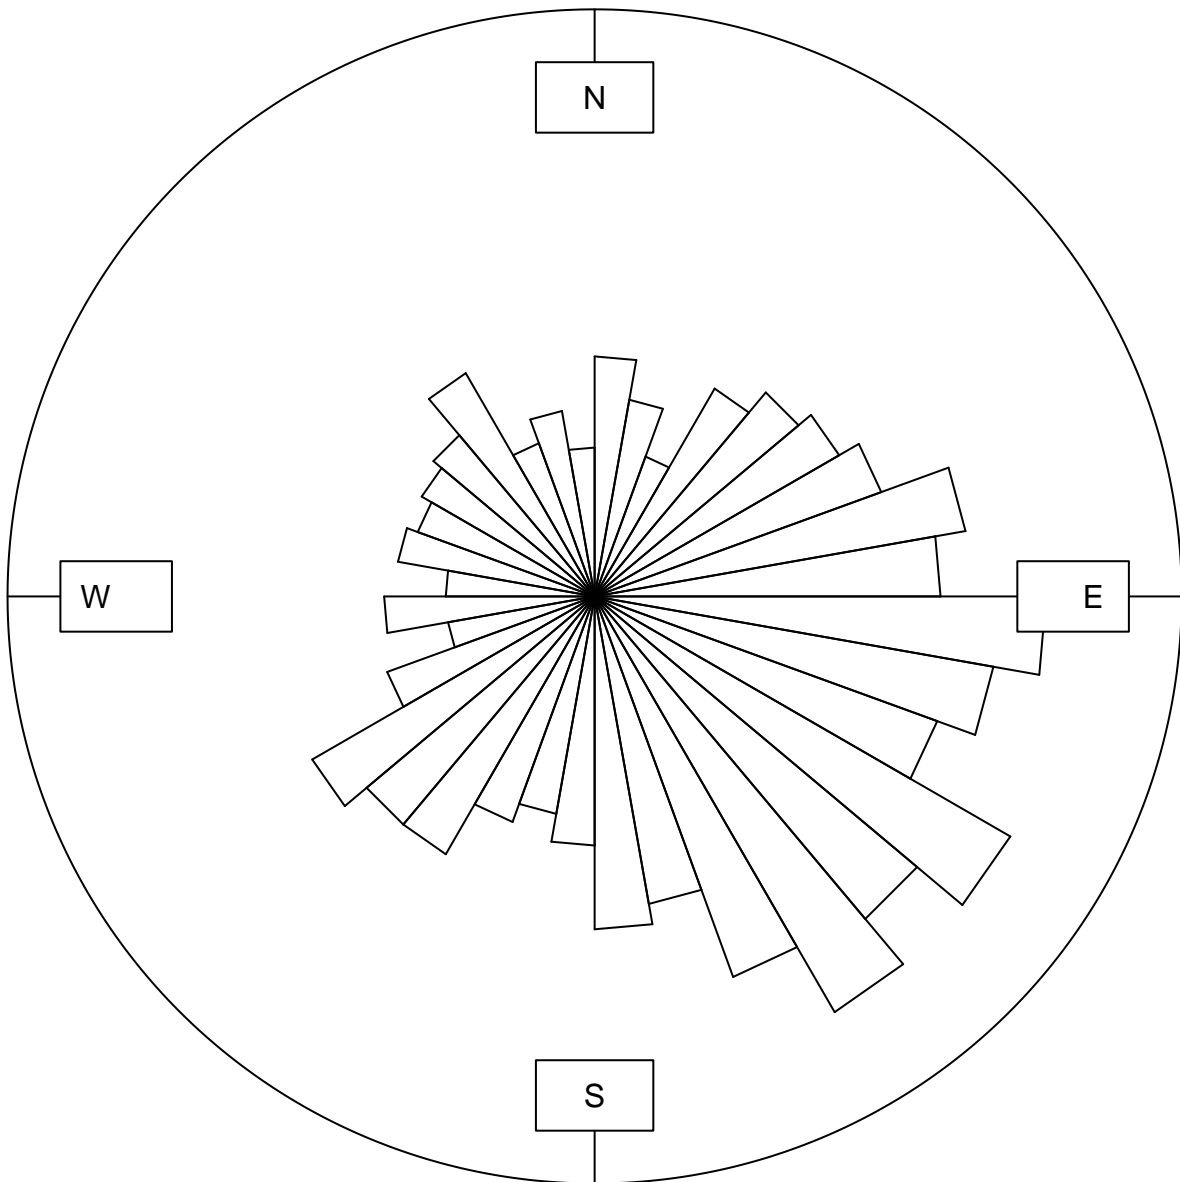

# bootstrap 404

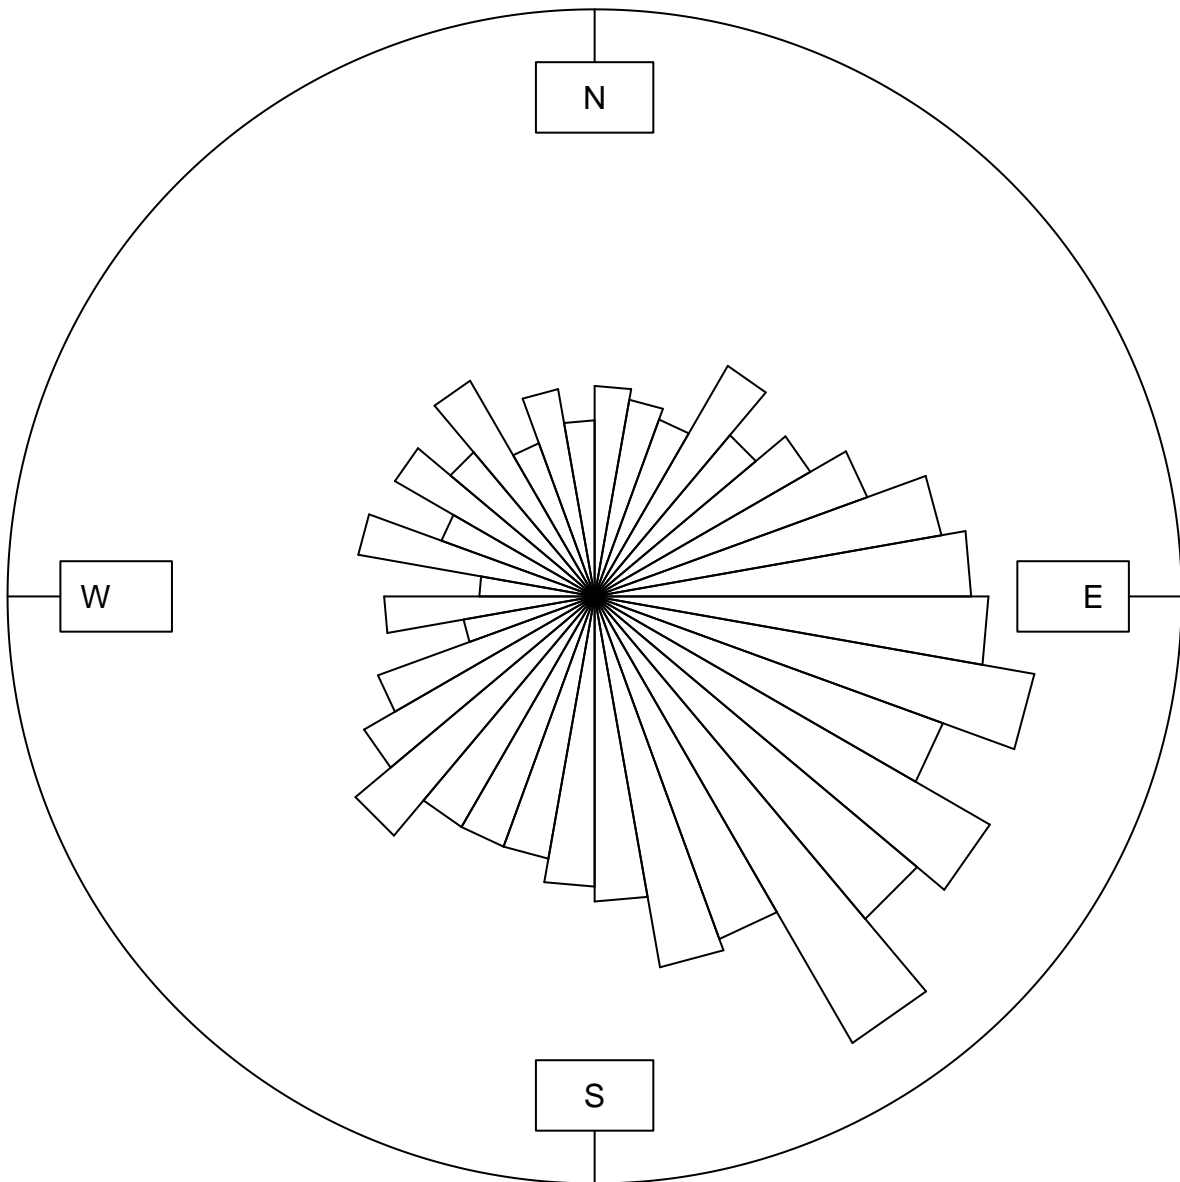

# bootstrap 405

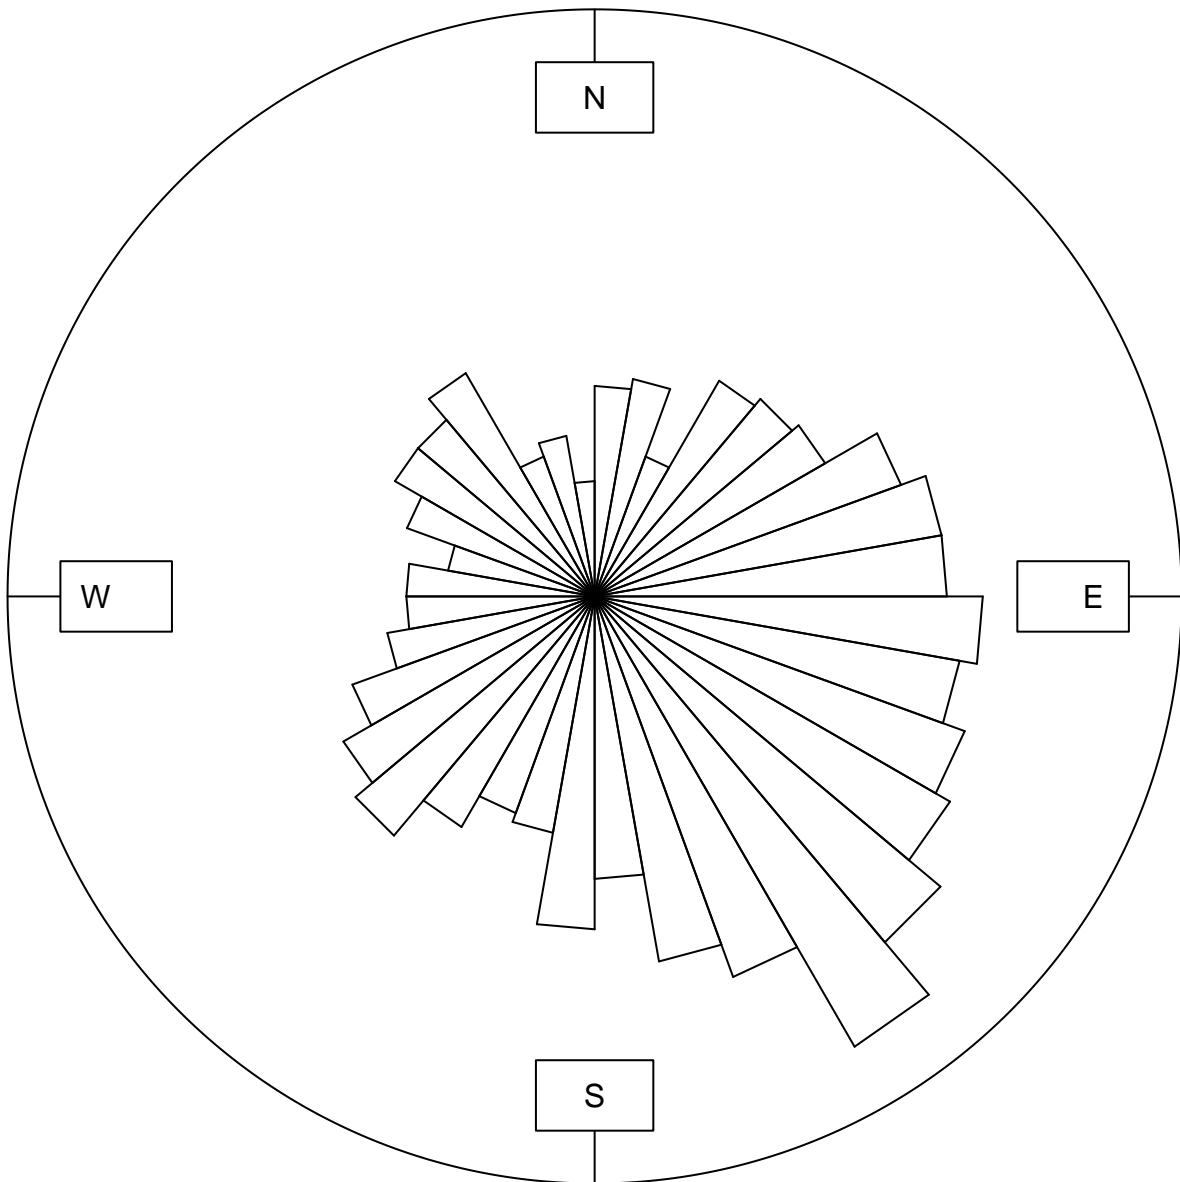

# bootstrap 406

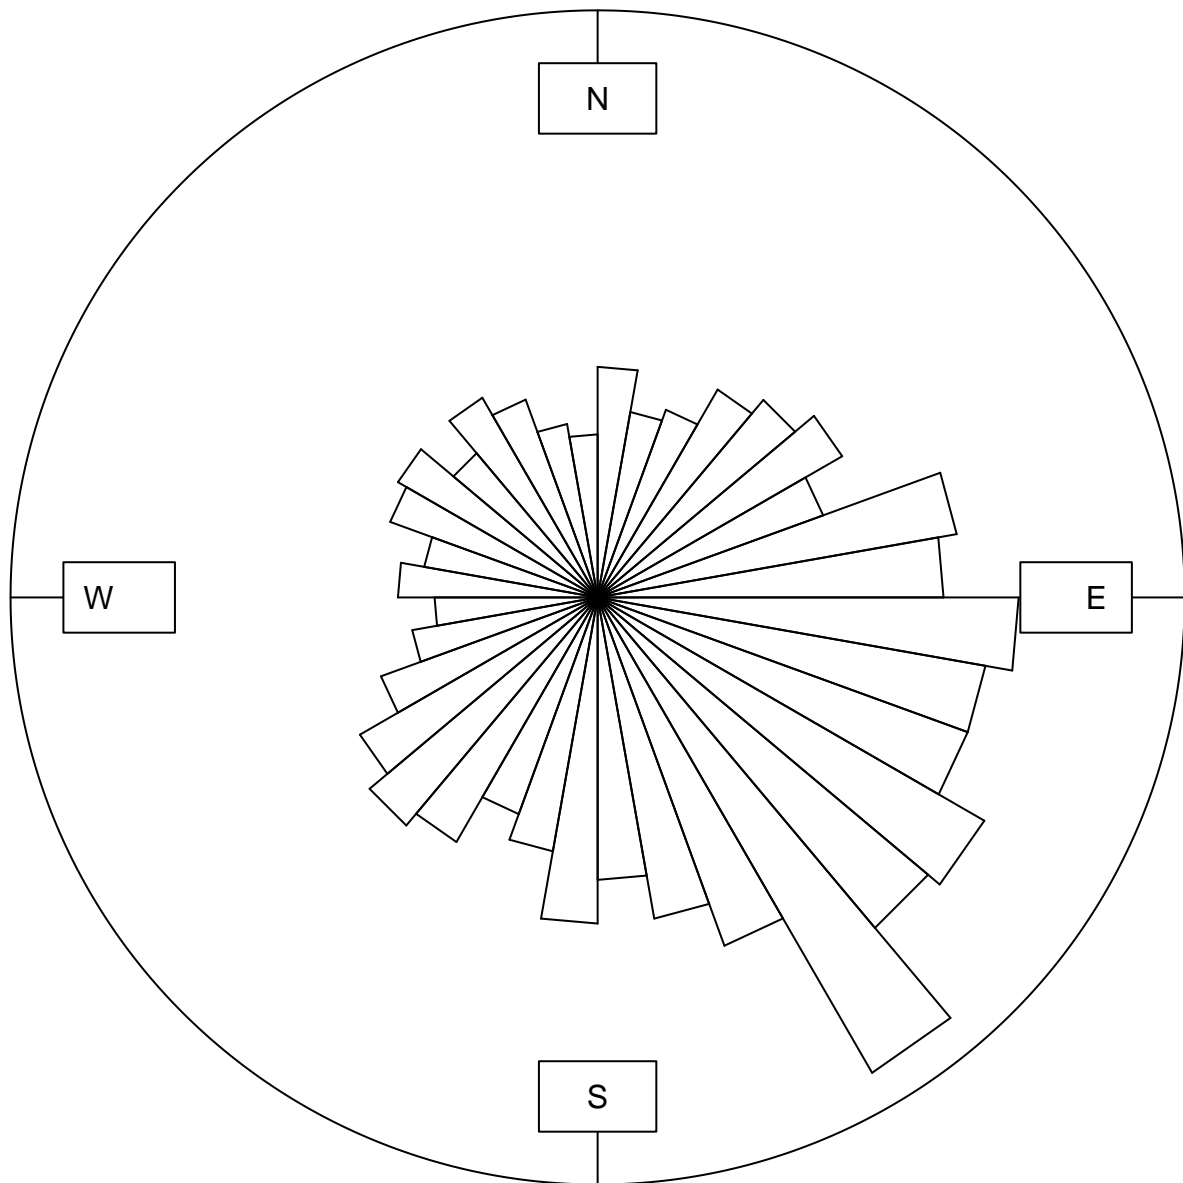

# bootstrap 407

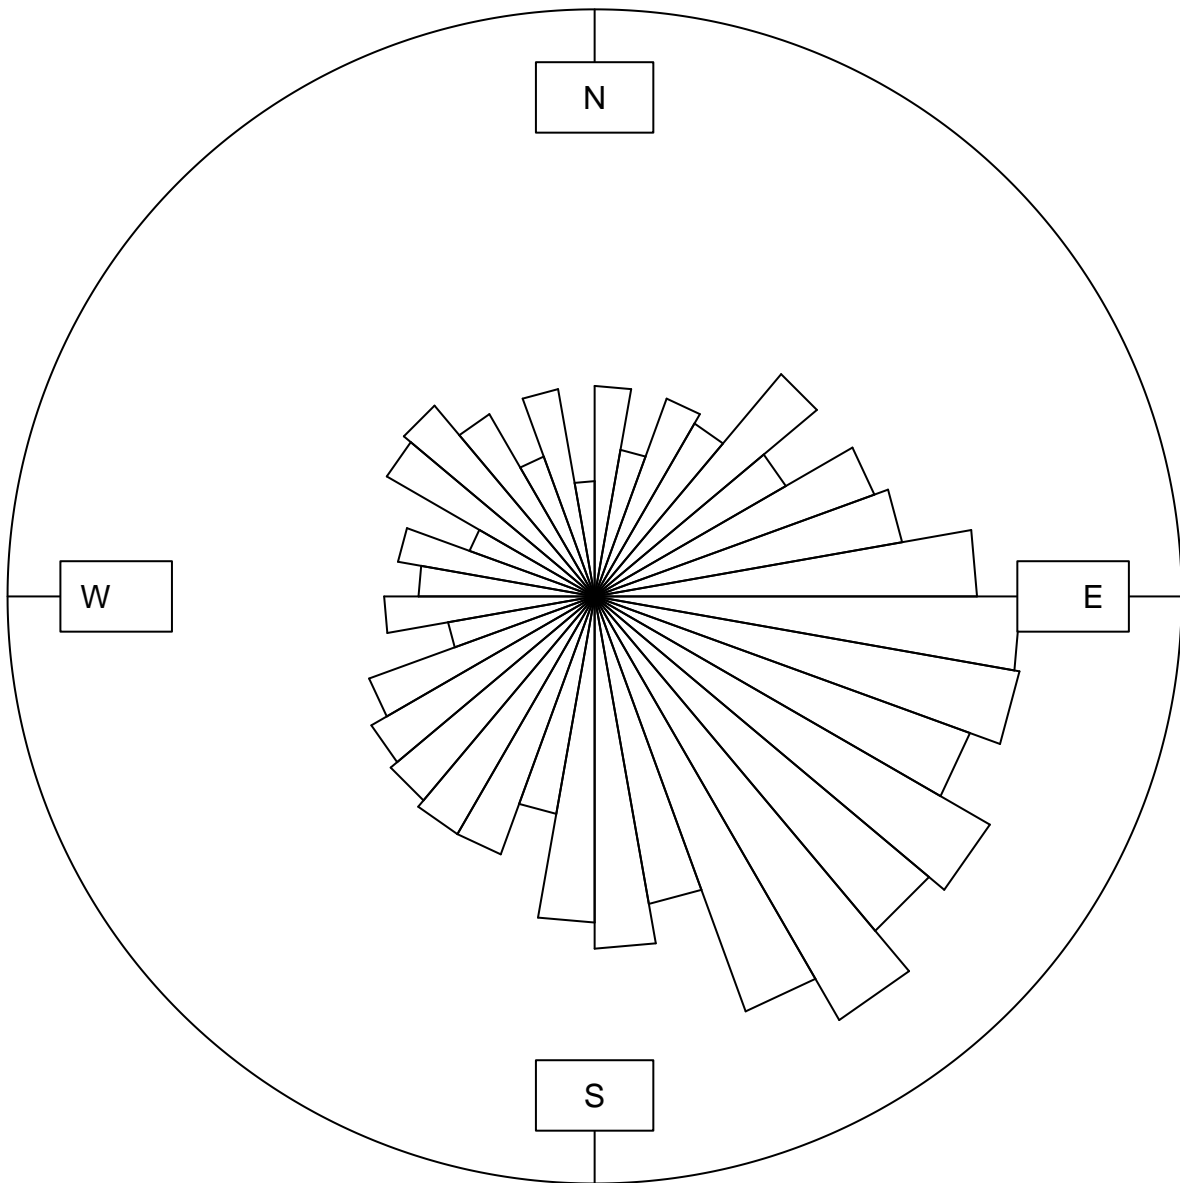

# bootstrap 408

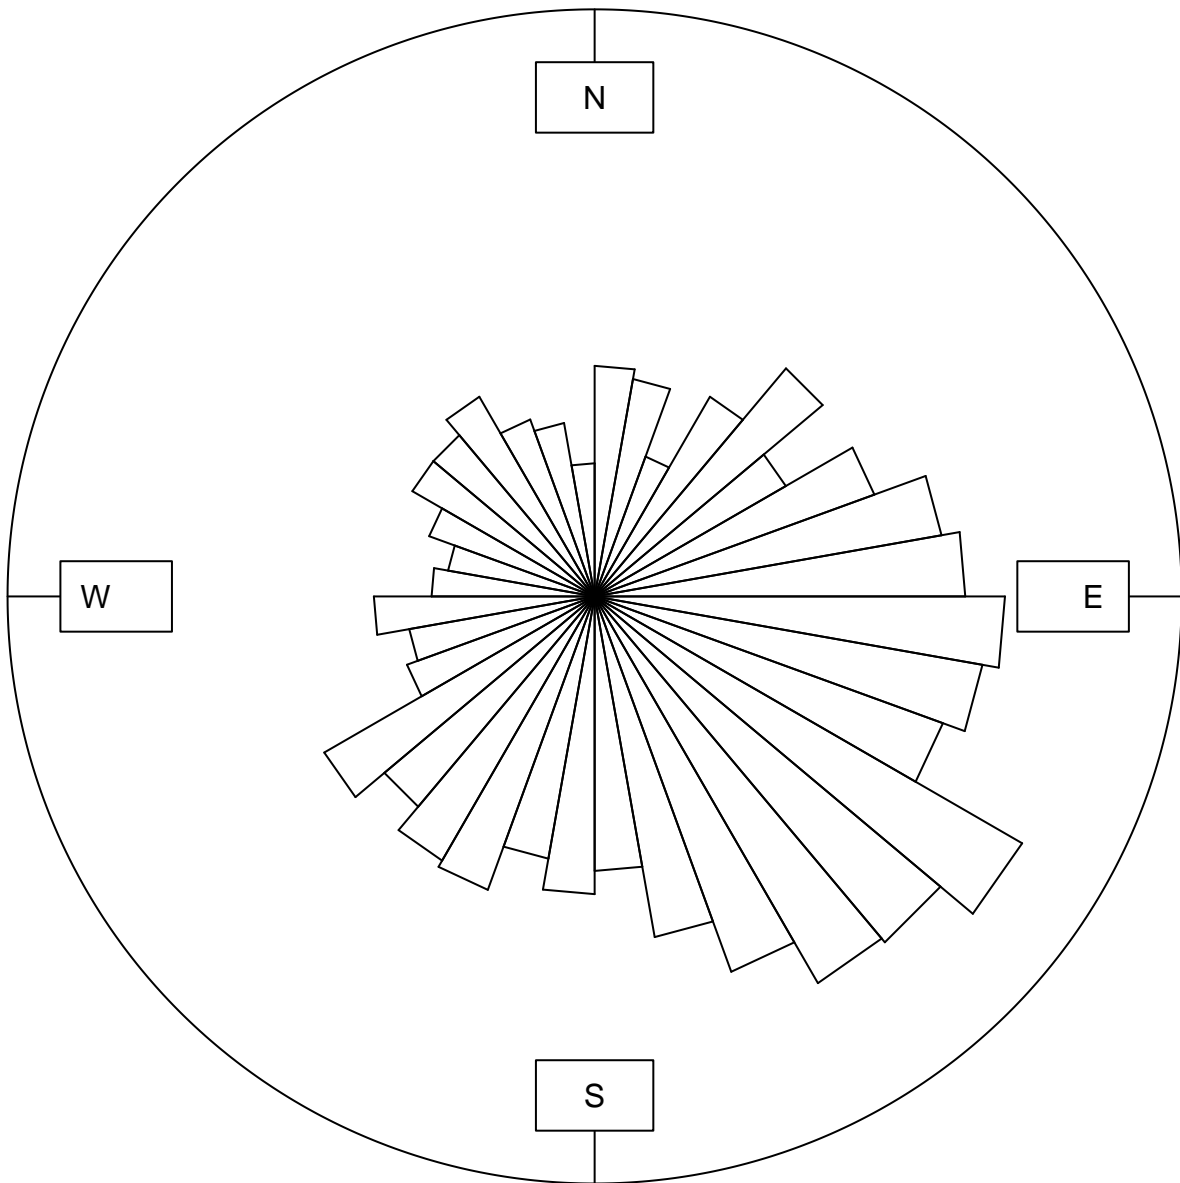



# bootstrap 409

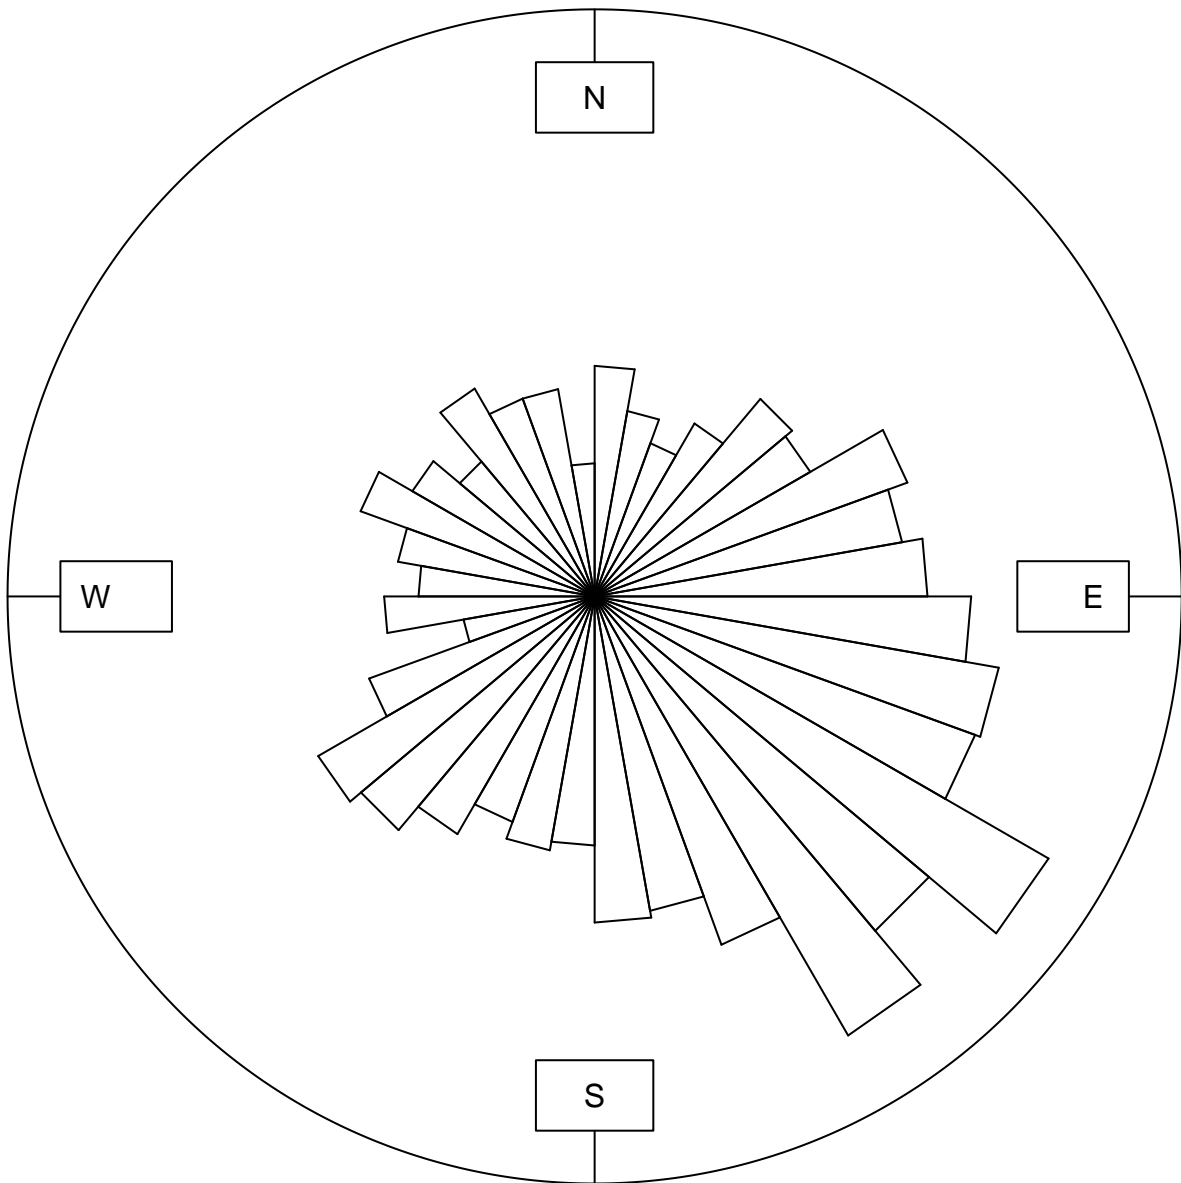

# bootstrap 410

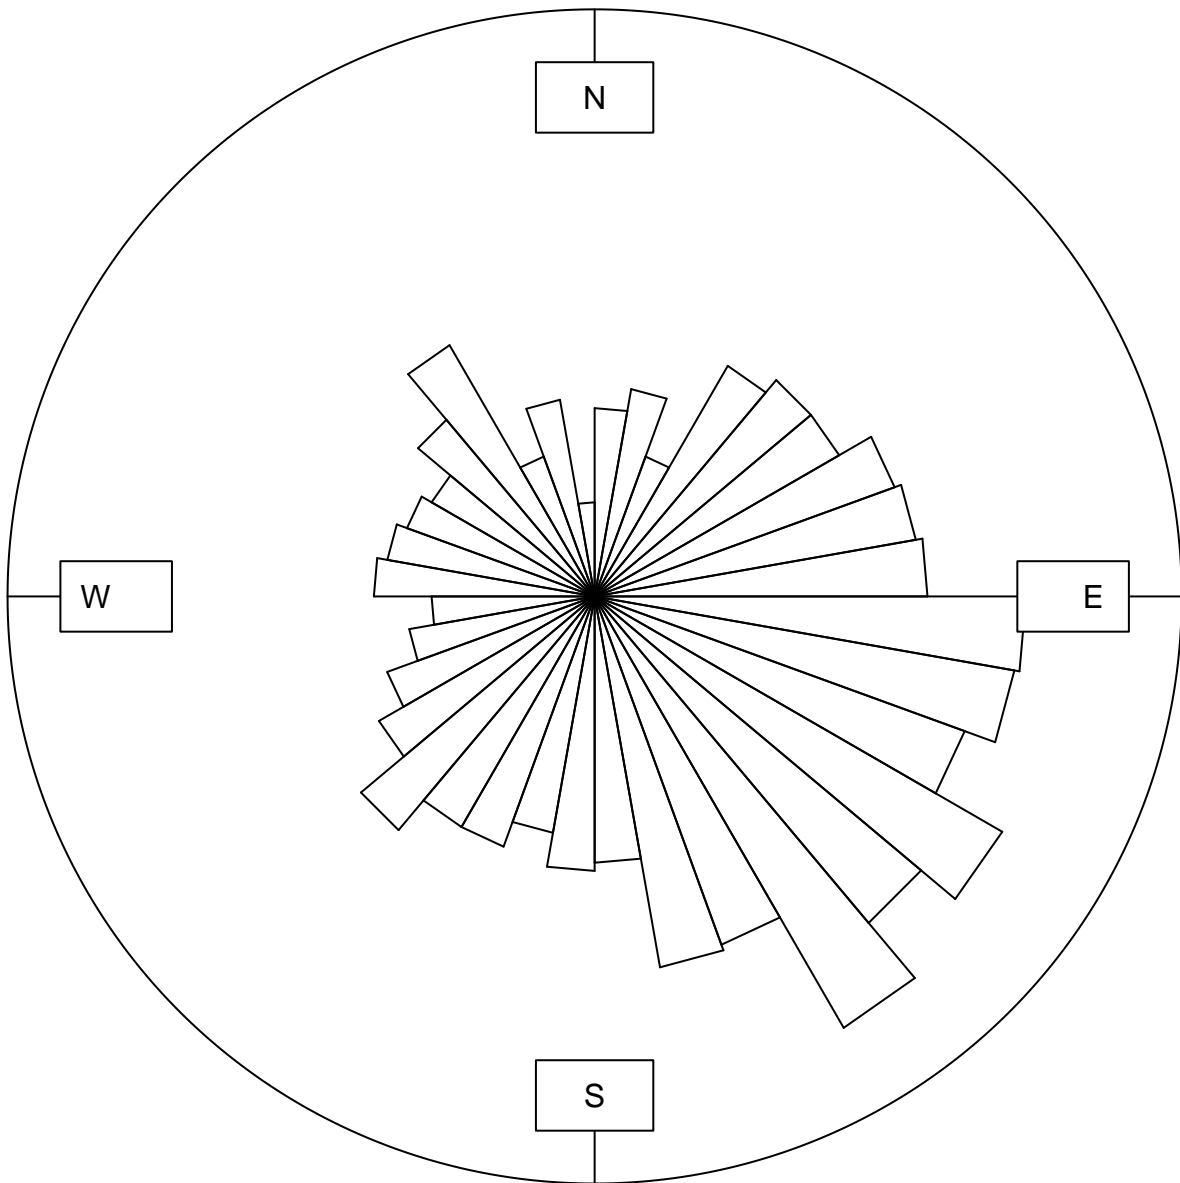

# bootstrap 411

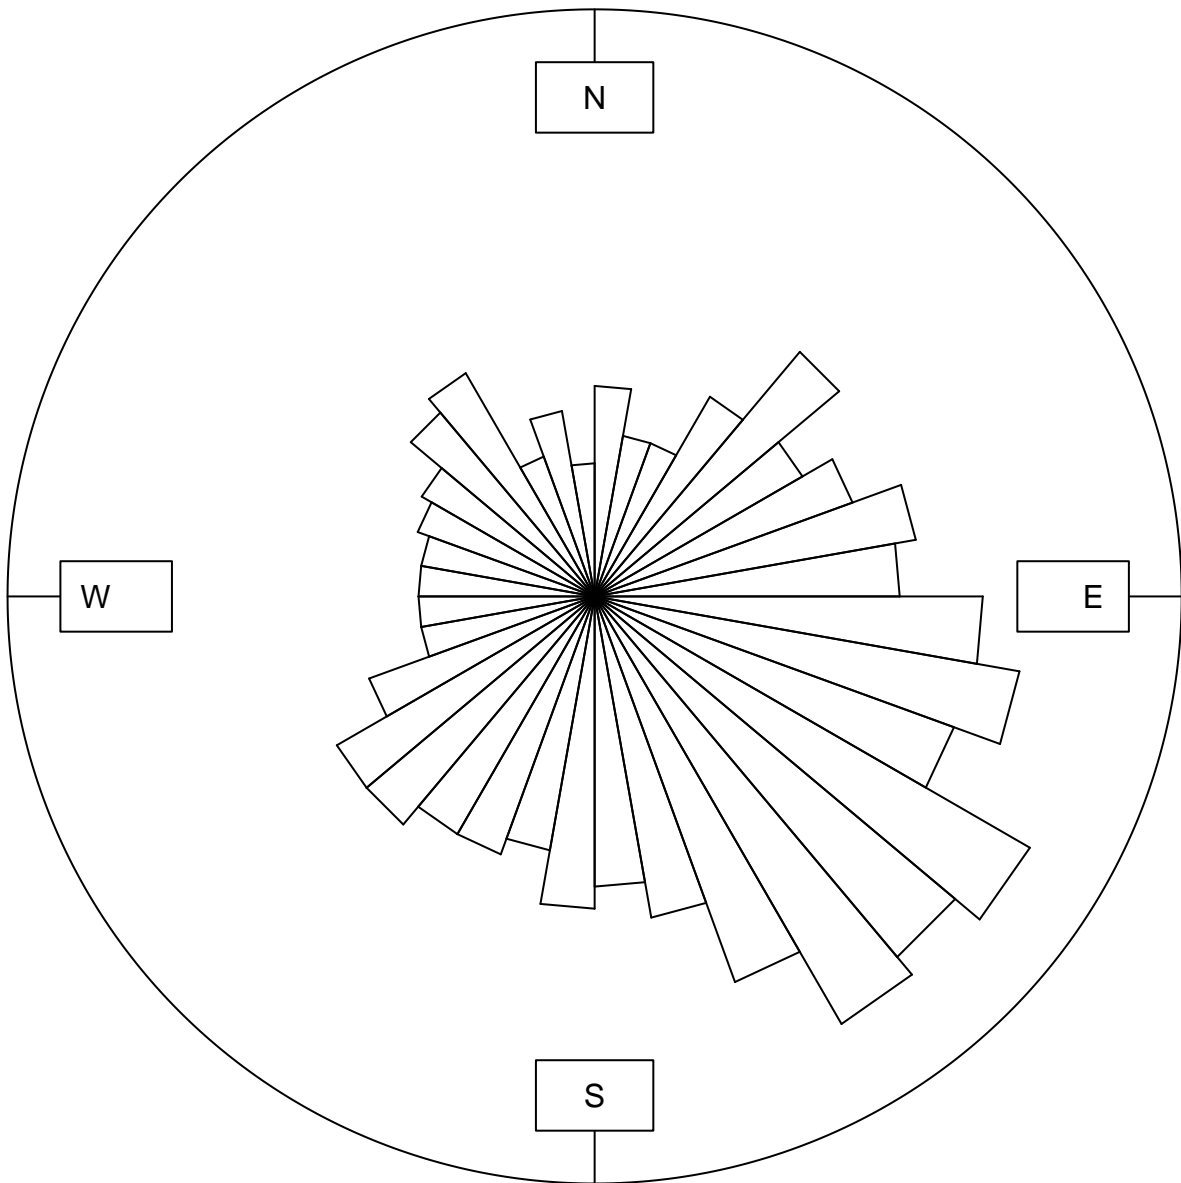

# bootstrap 412

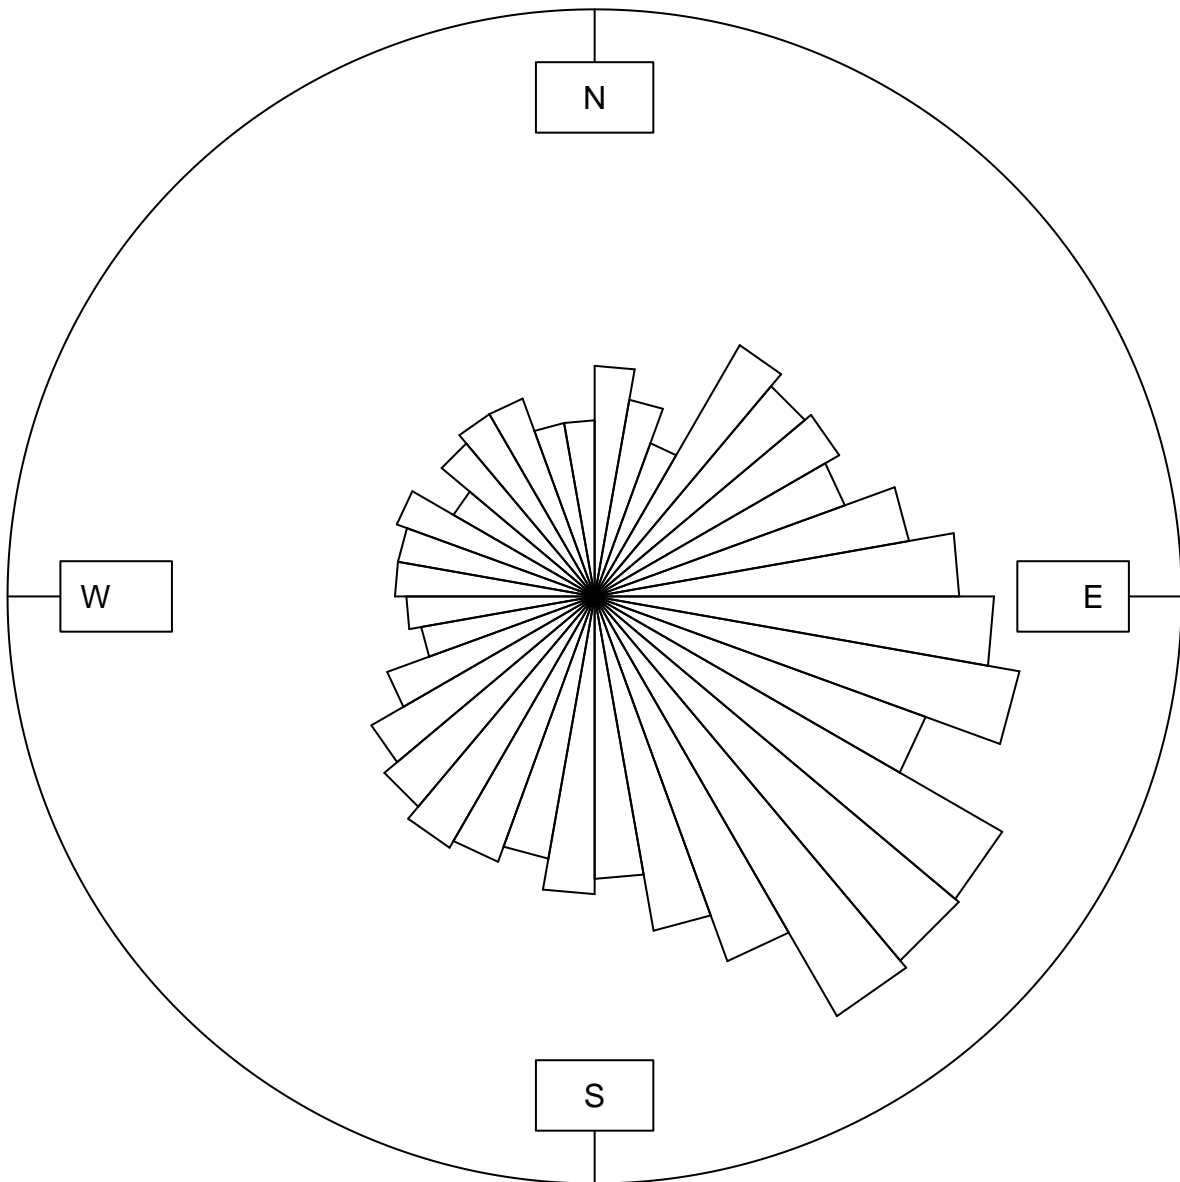

# bootstrap 413

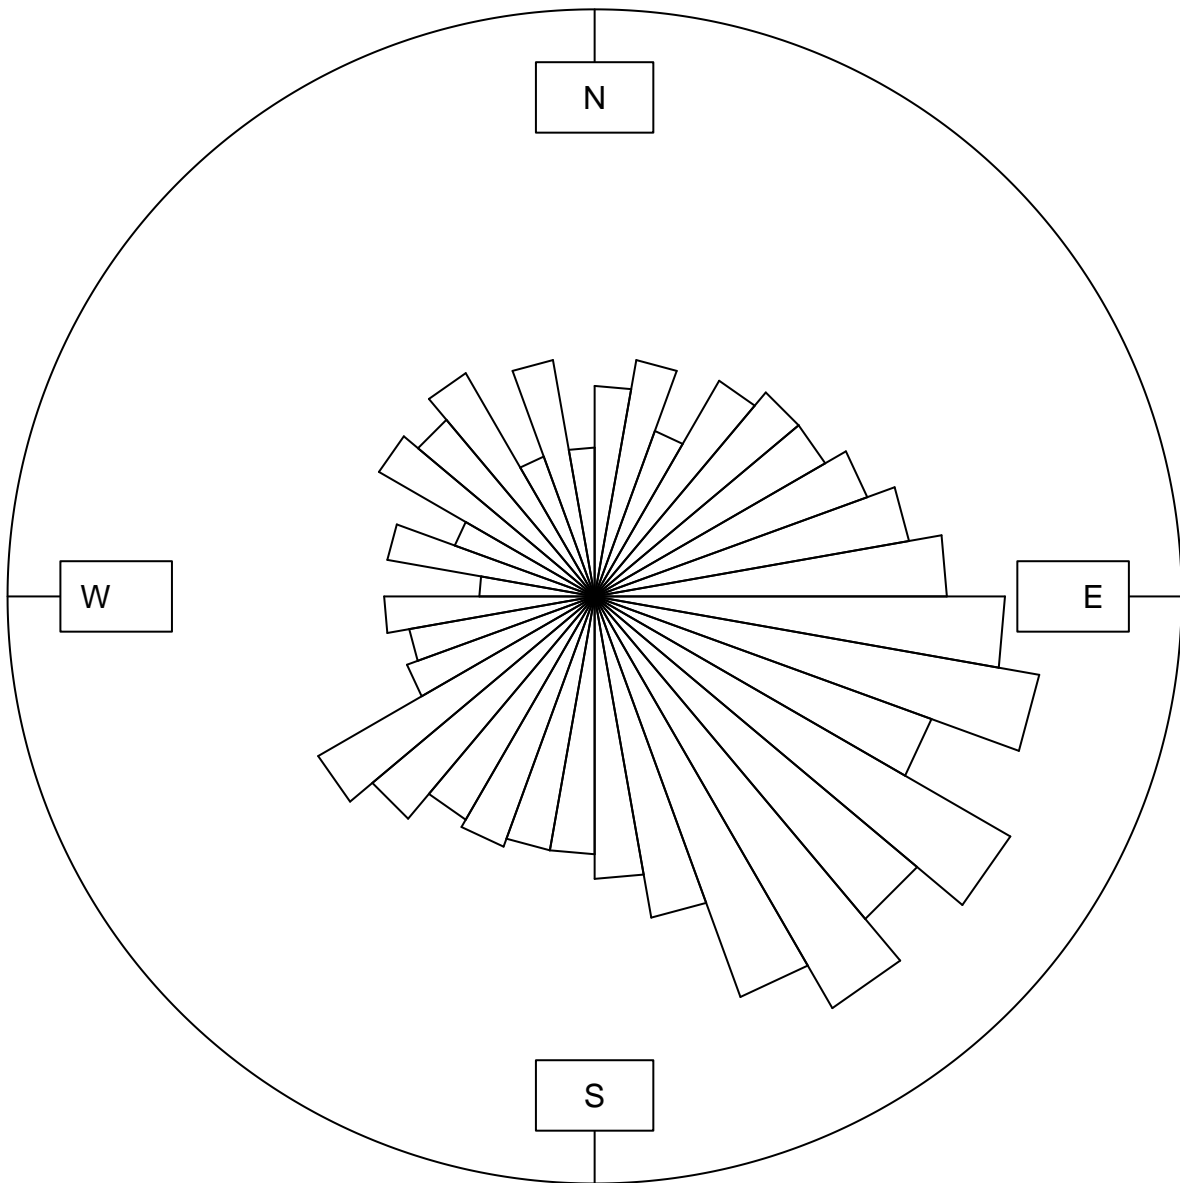

# bootstrap 414

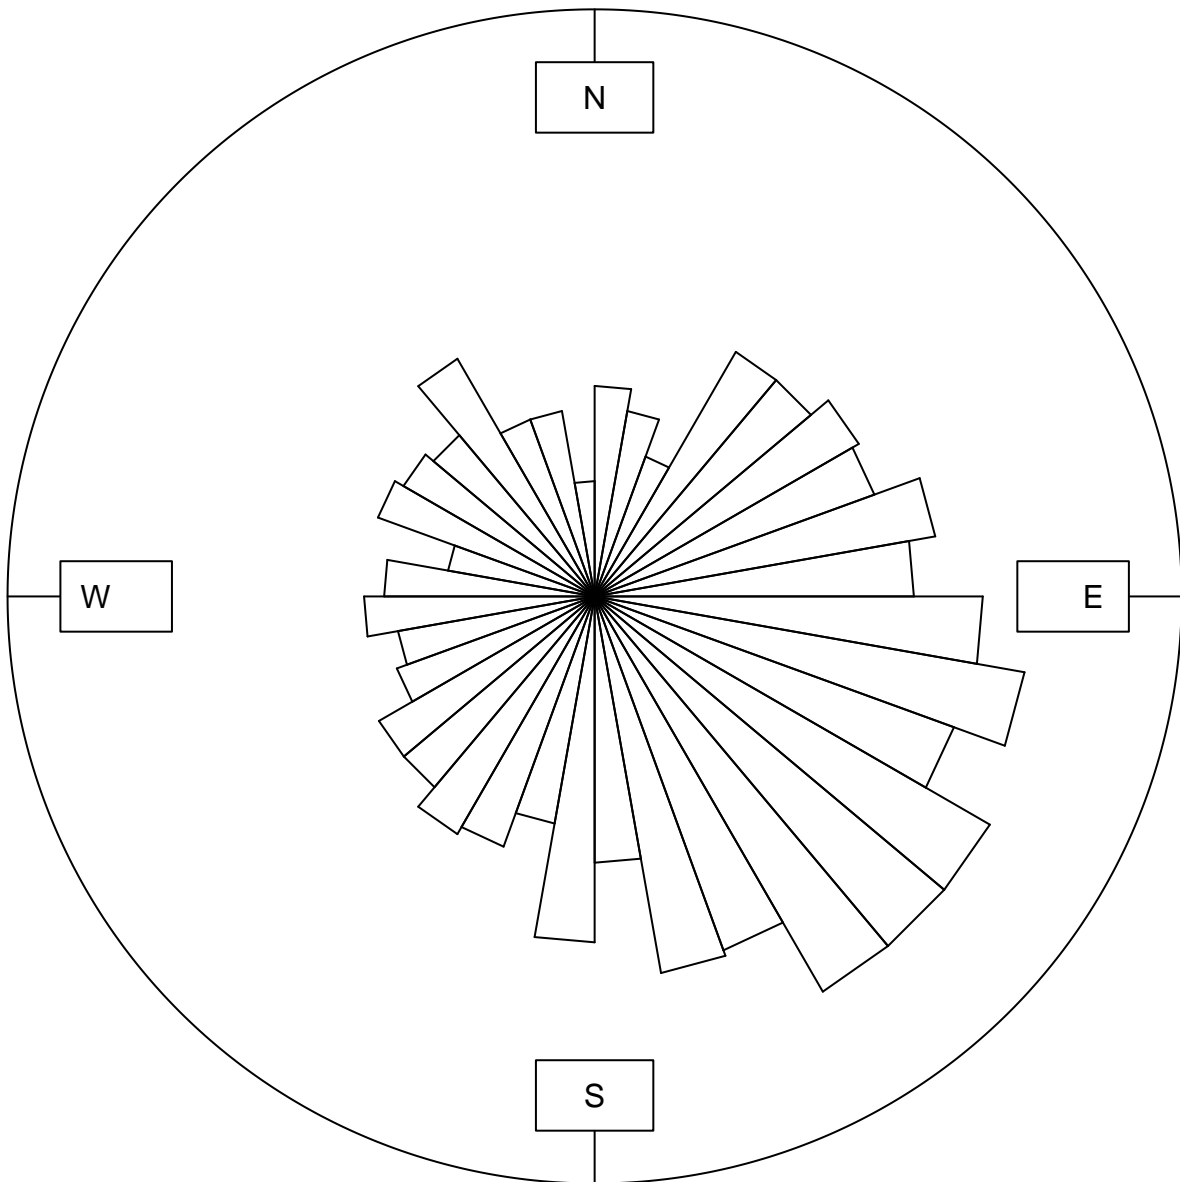

# bootstrap 415

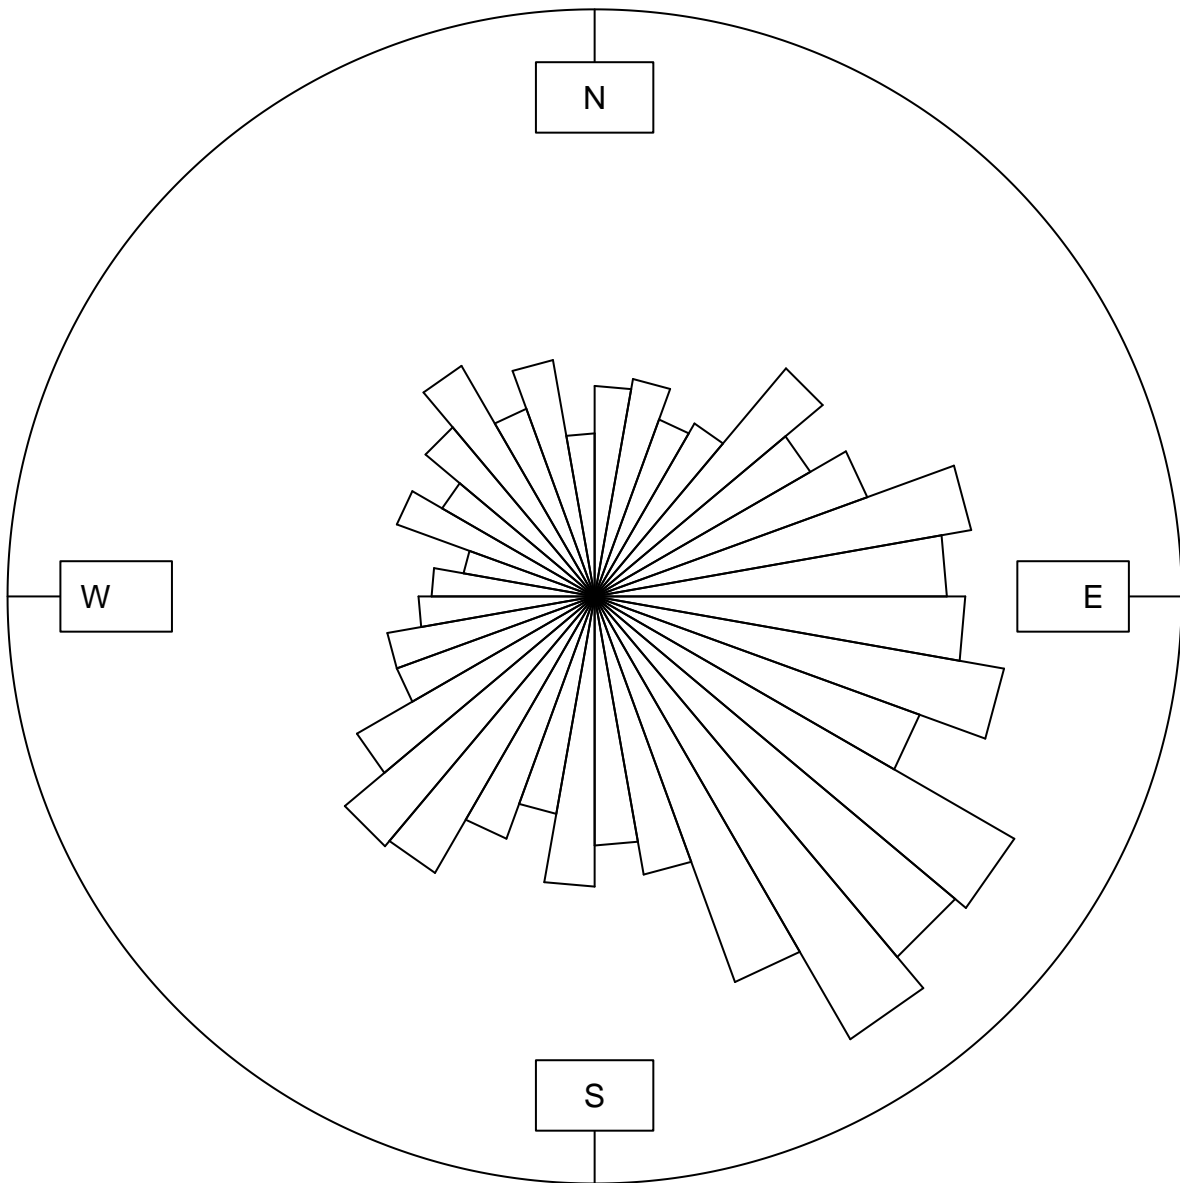

# bootstrap 416

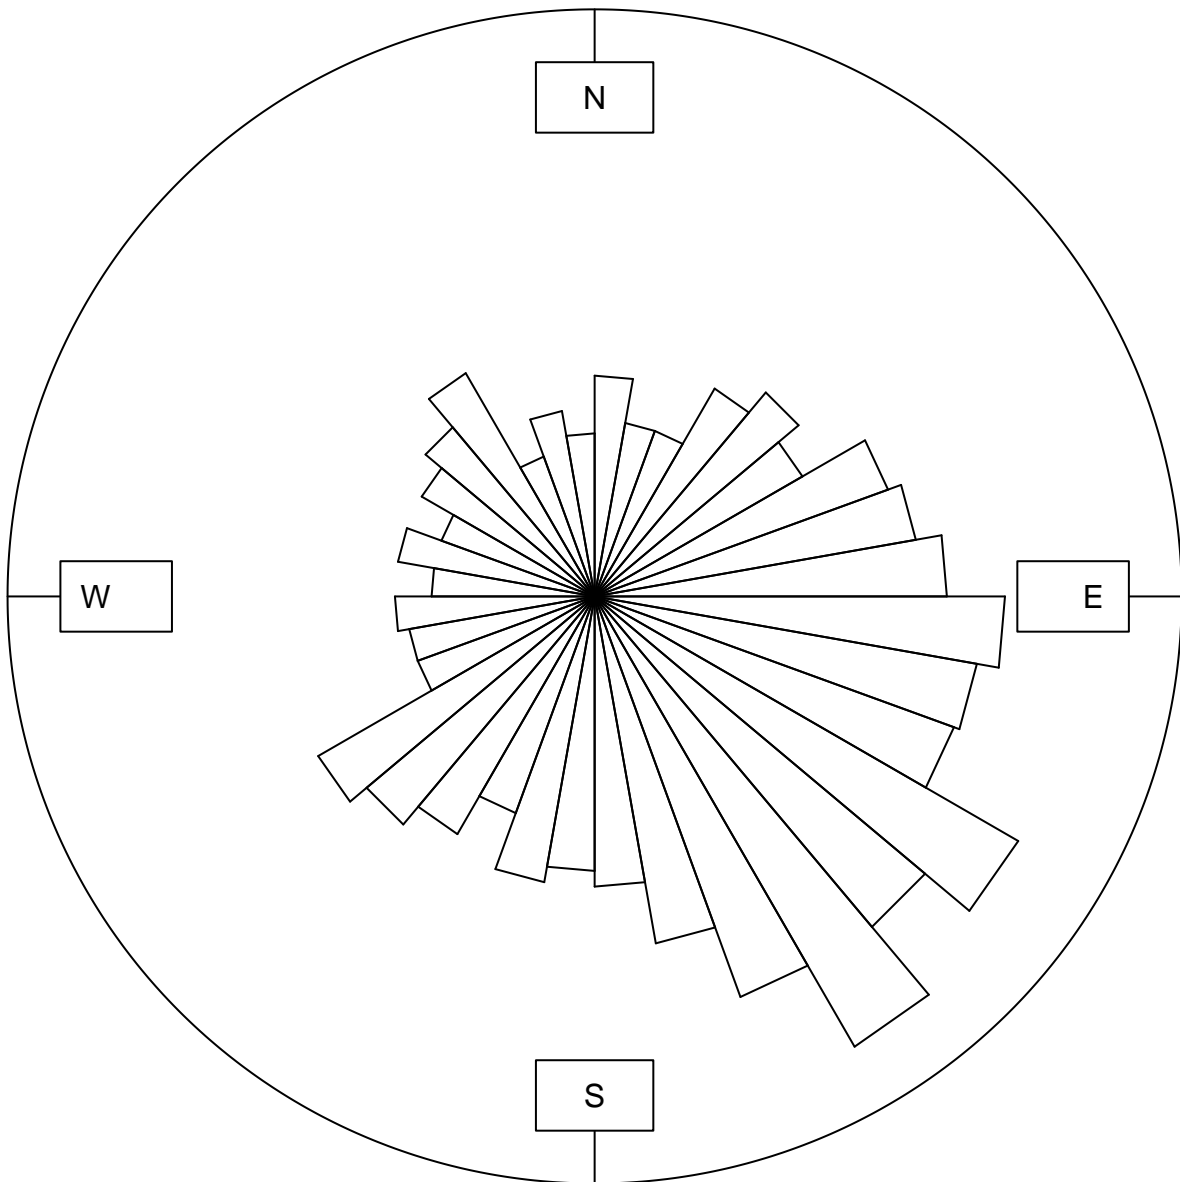



# bootstrap 417

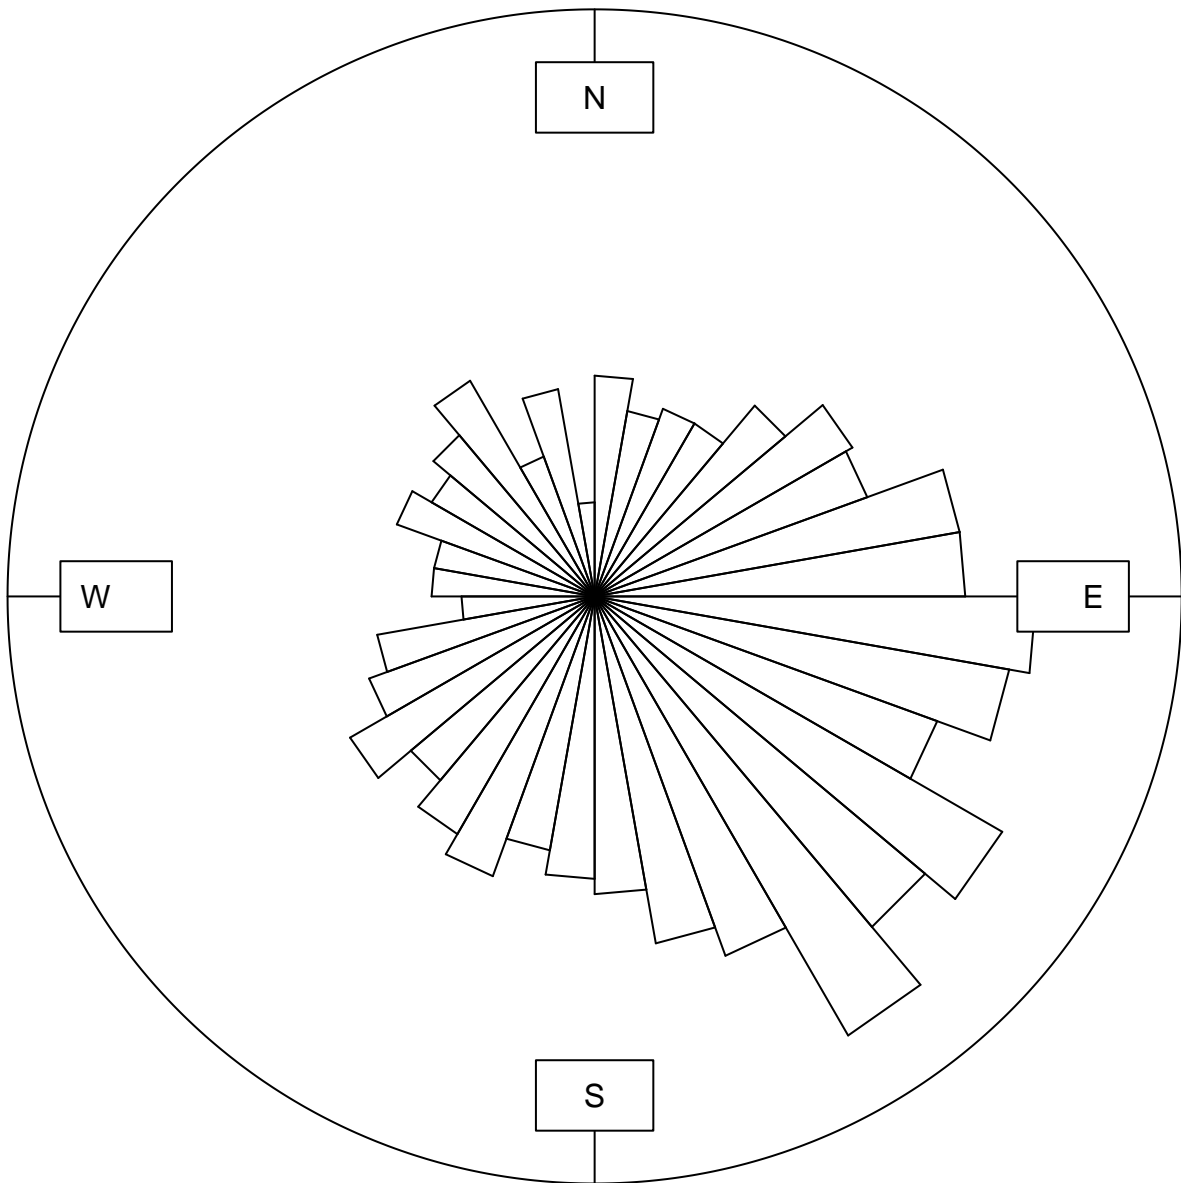

# bootstrap 418

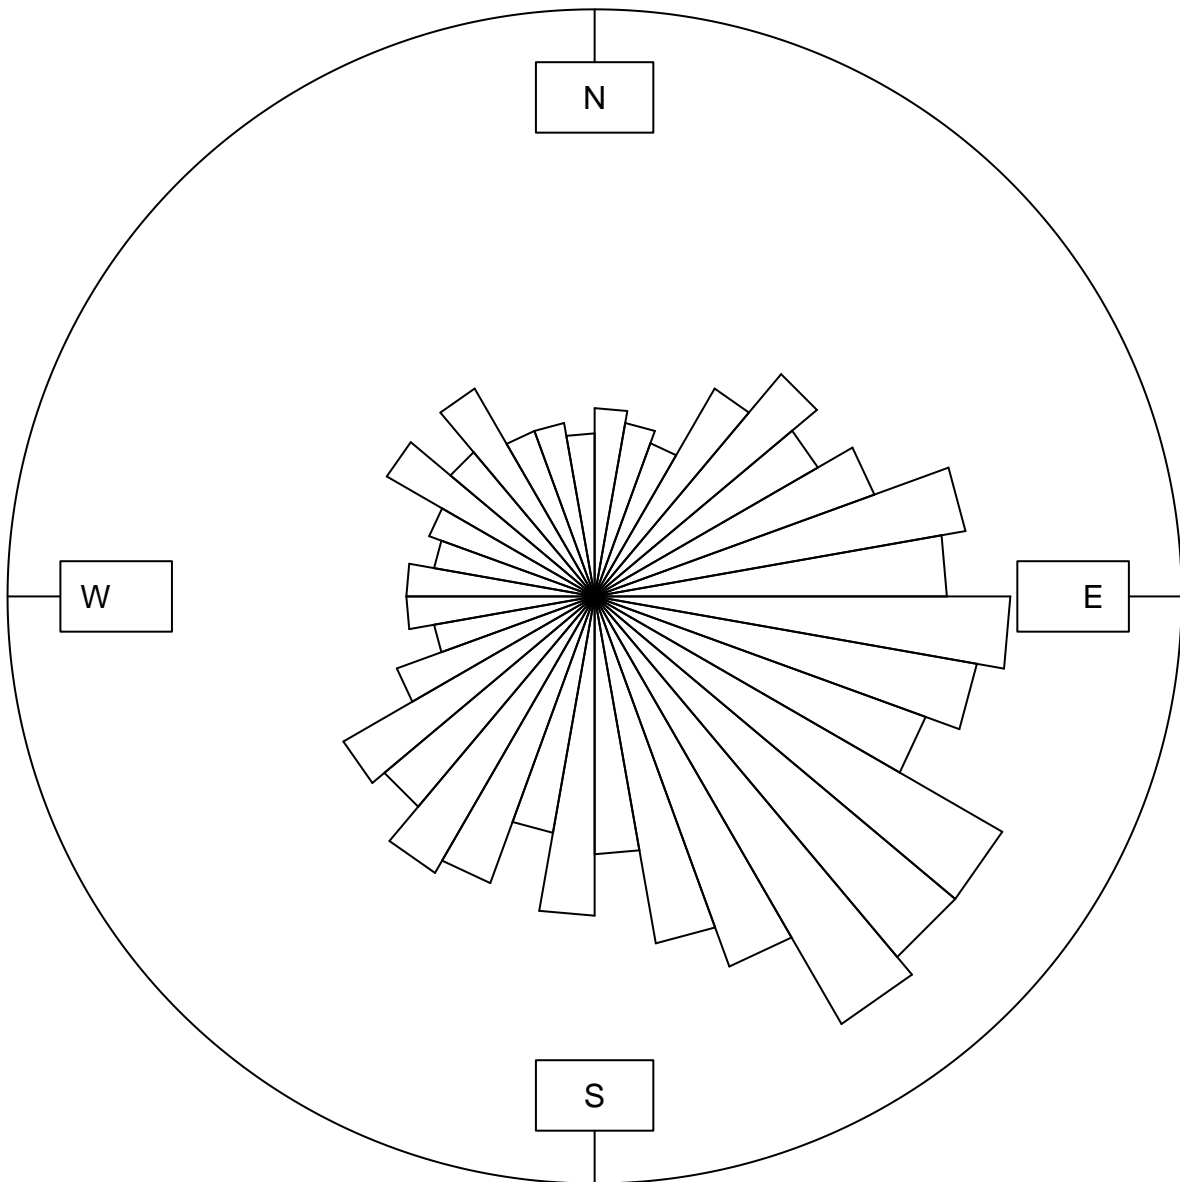

# bootstrap 419

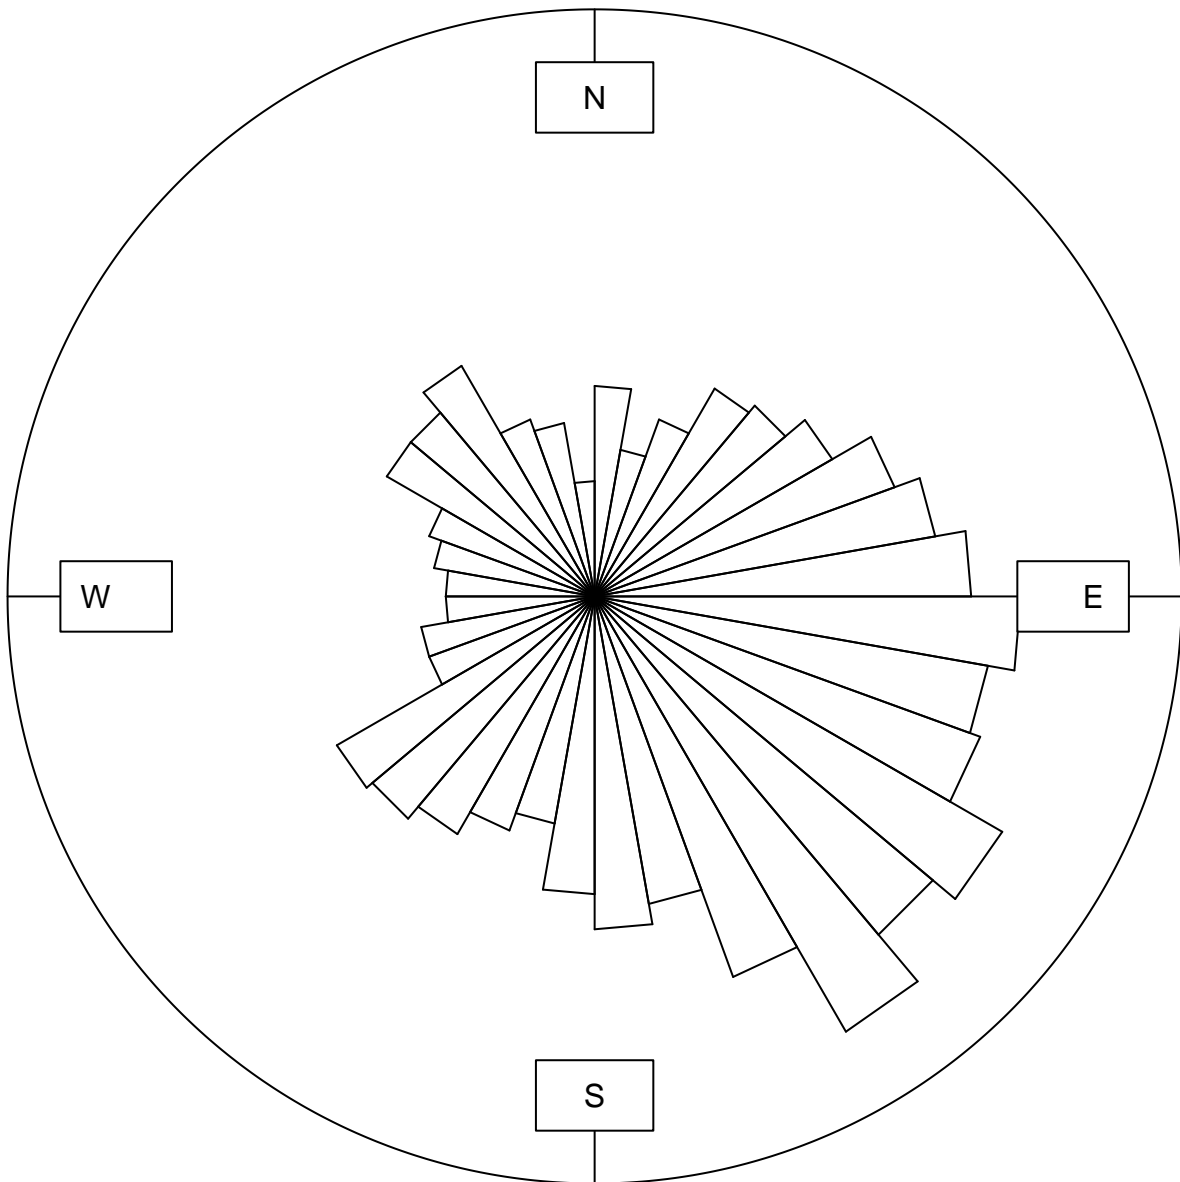

# bootstrap 420

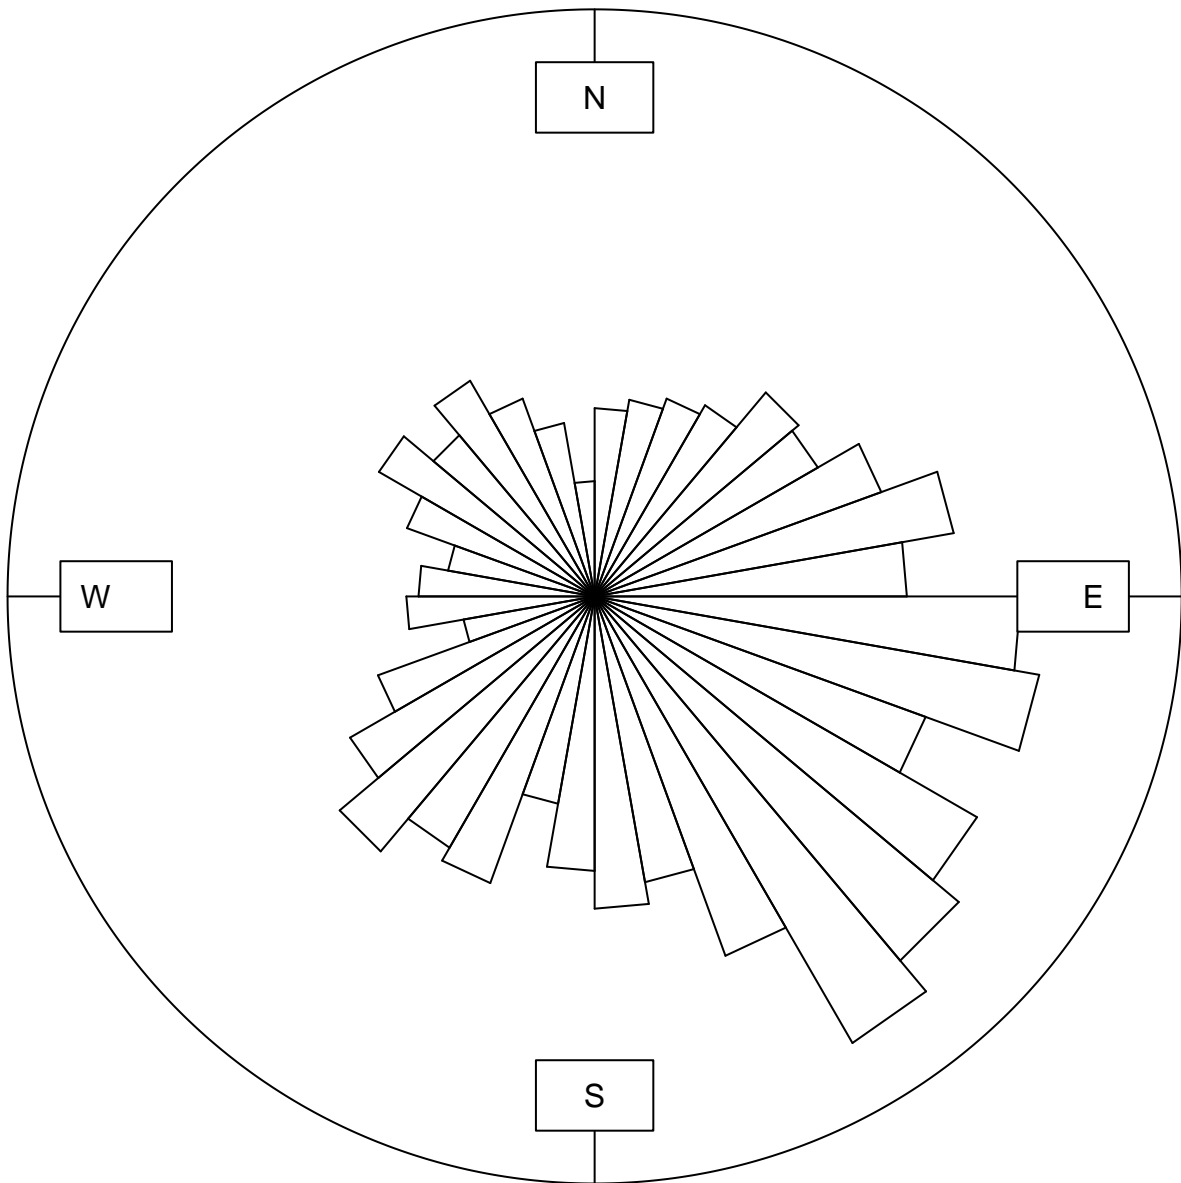

# bootstrap 421

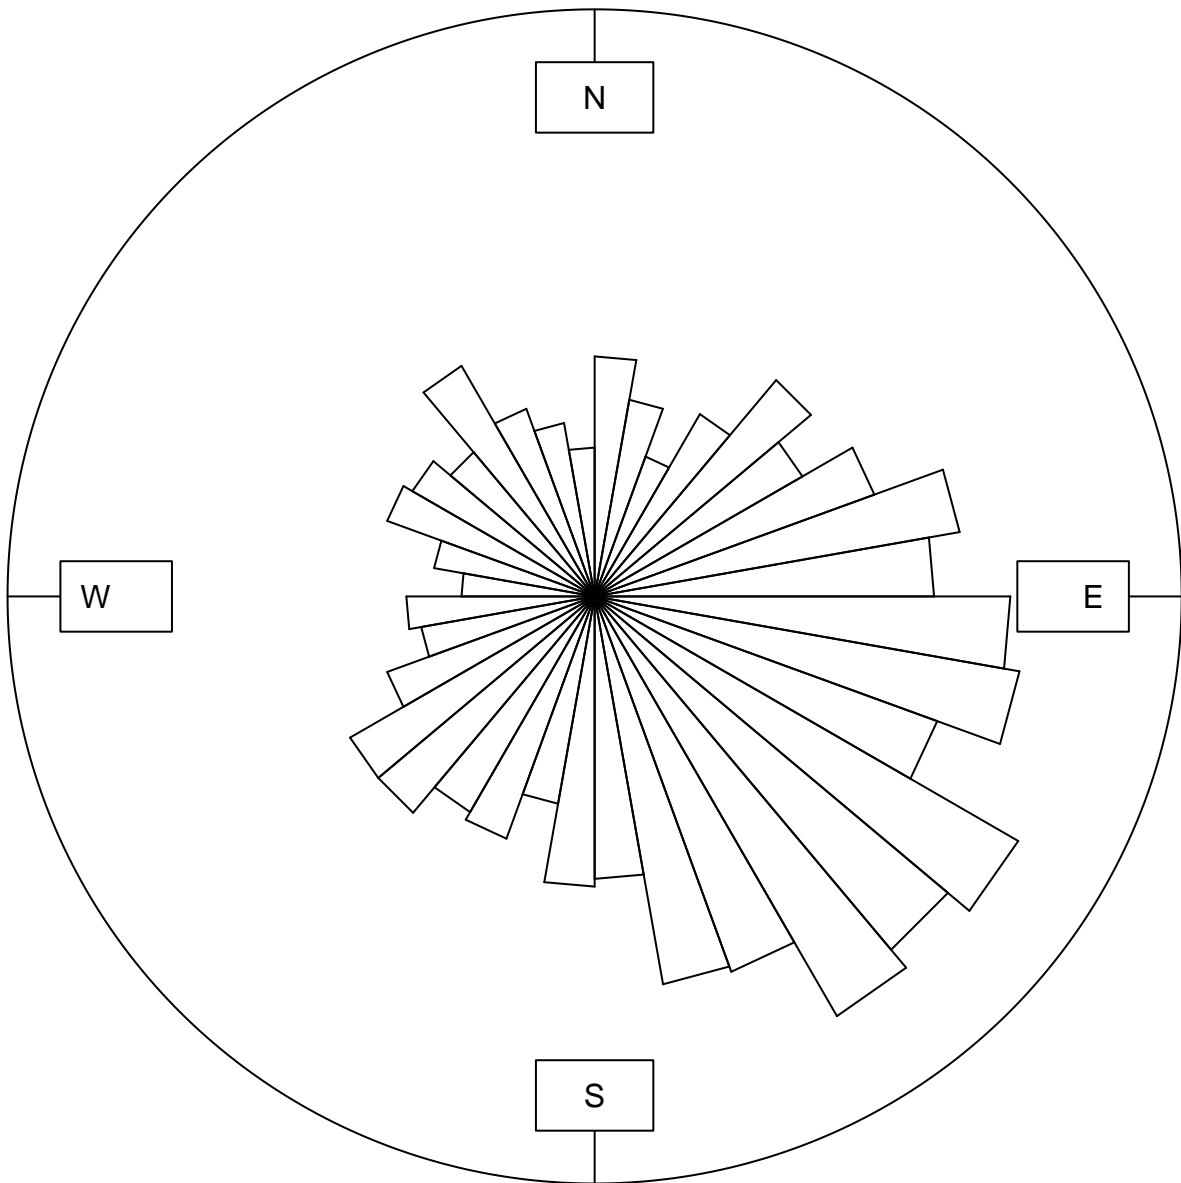

# bootstrap 422

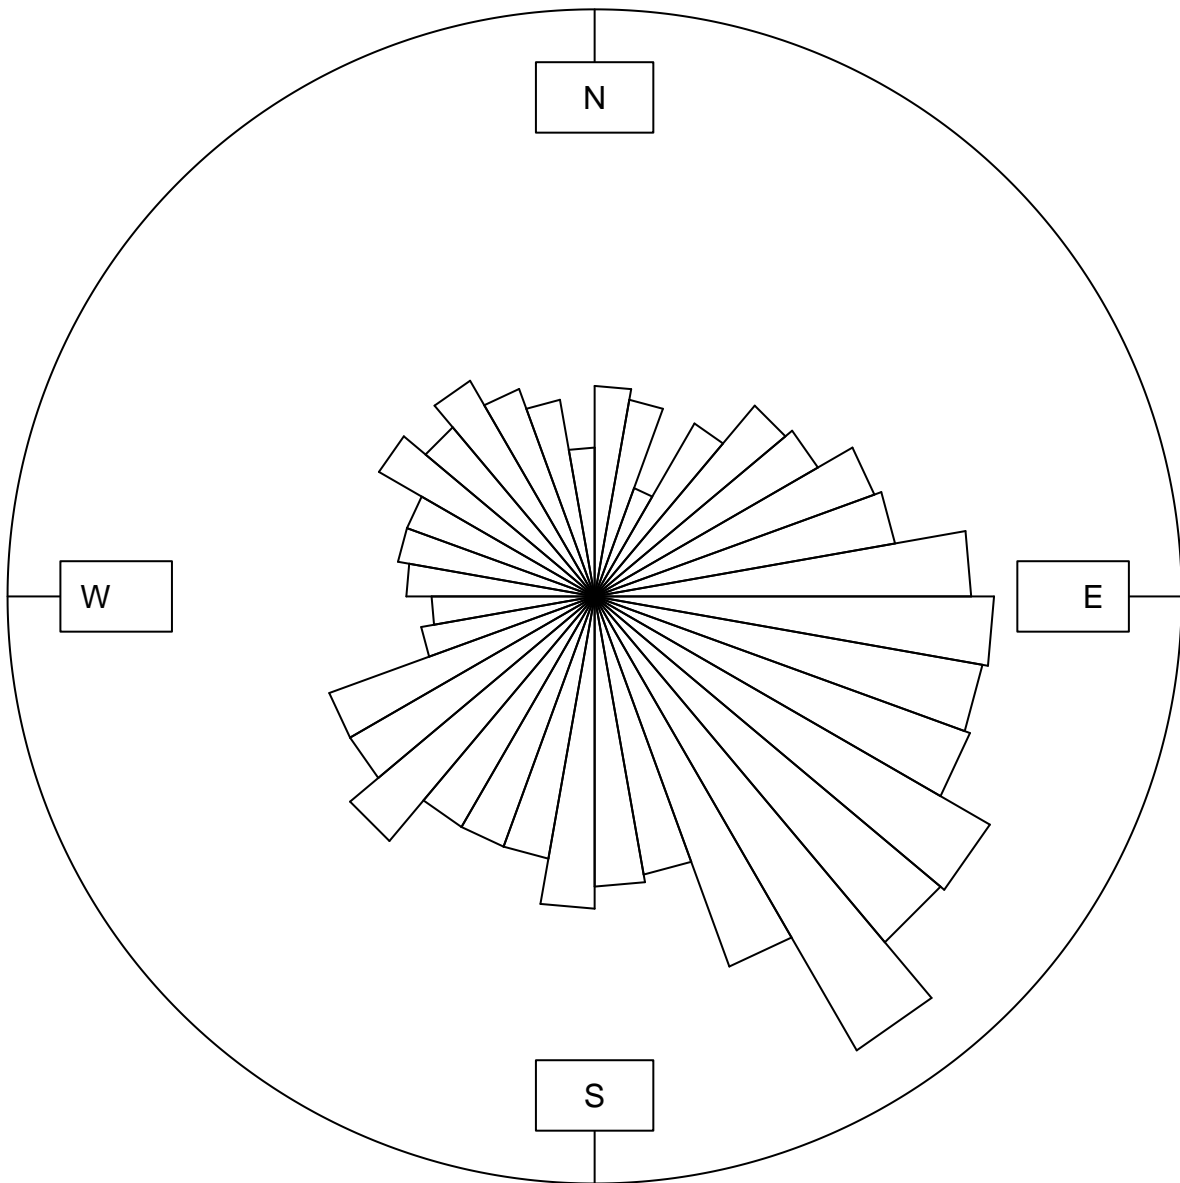

# bootstrap 423

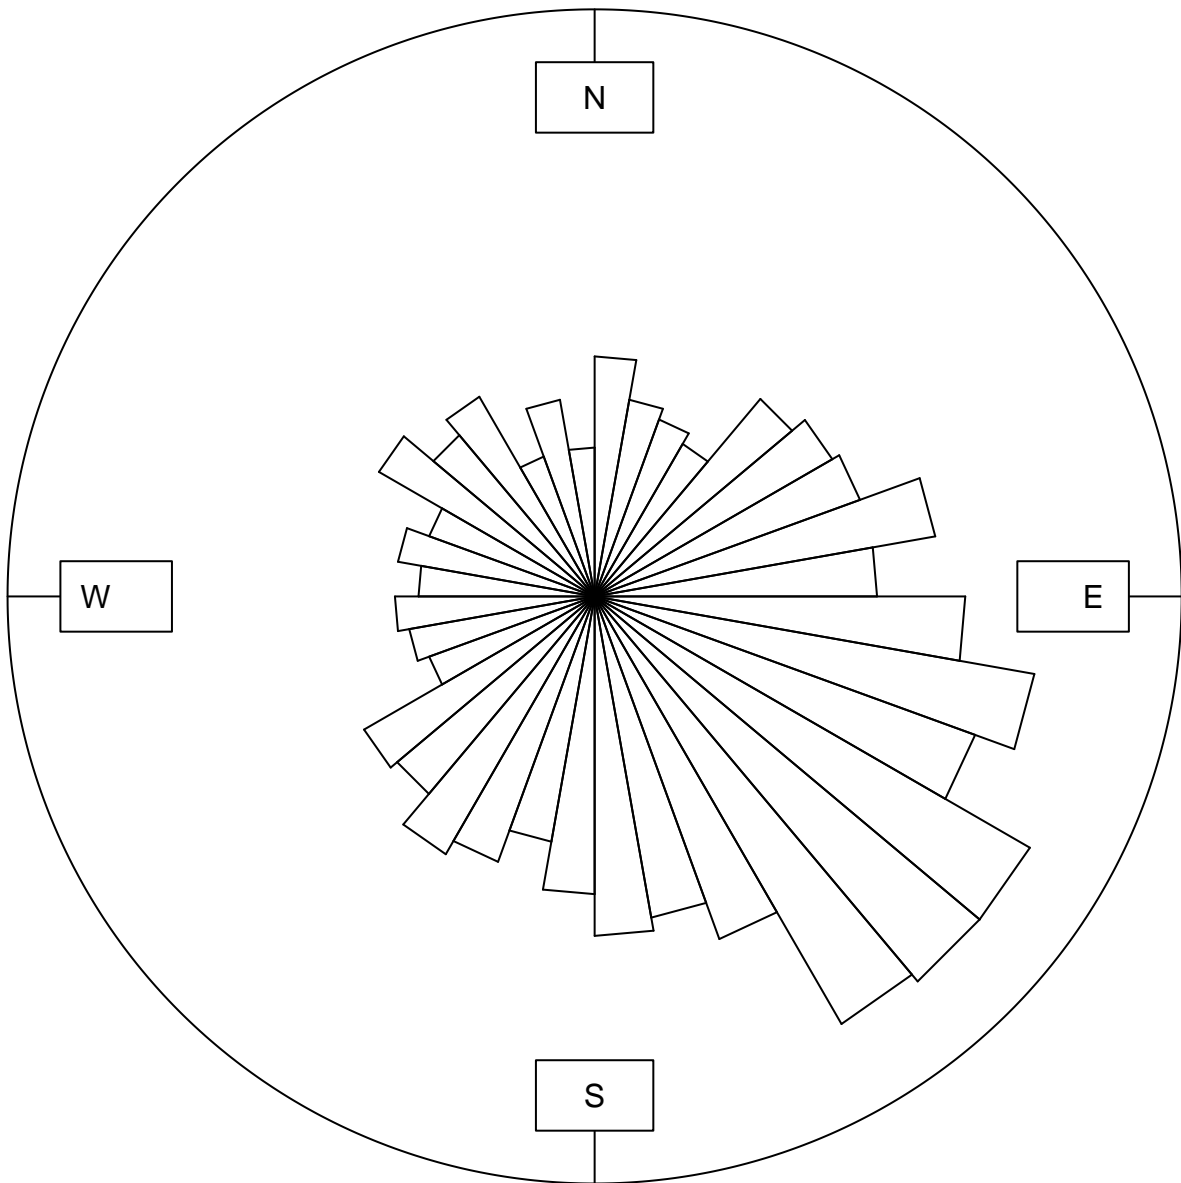

# bootstrap 424

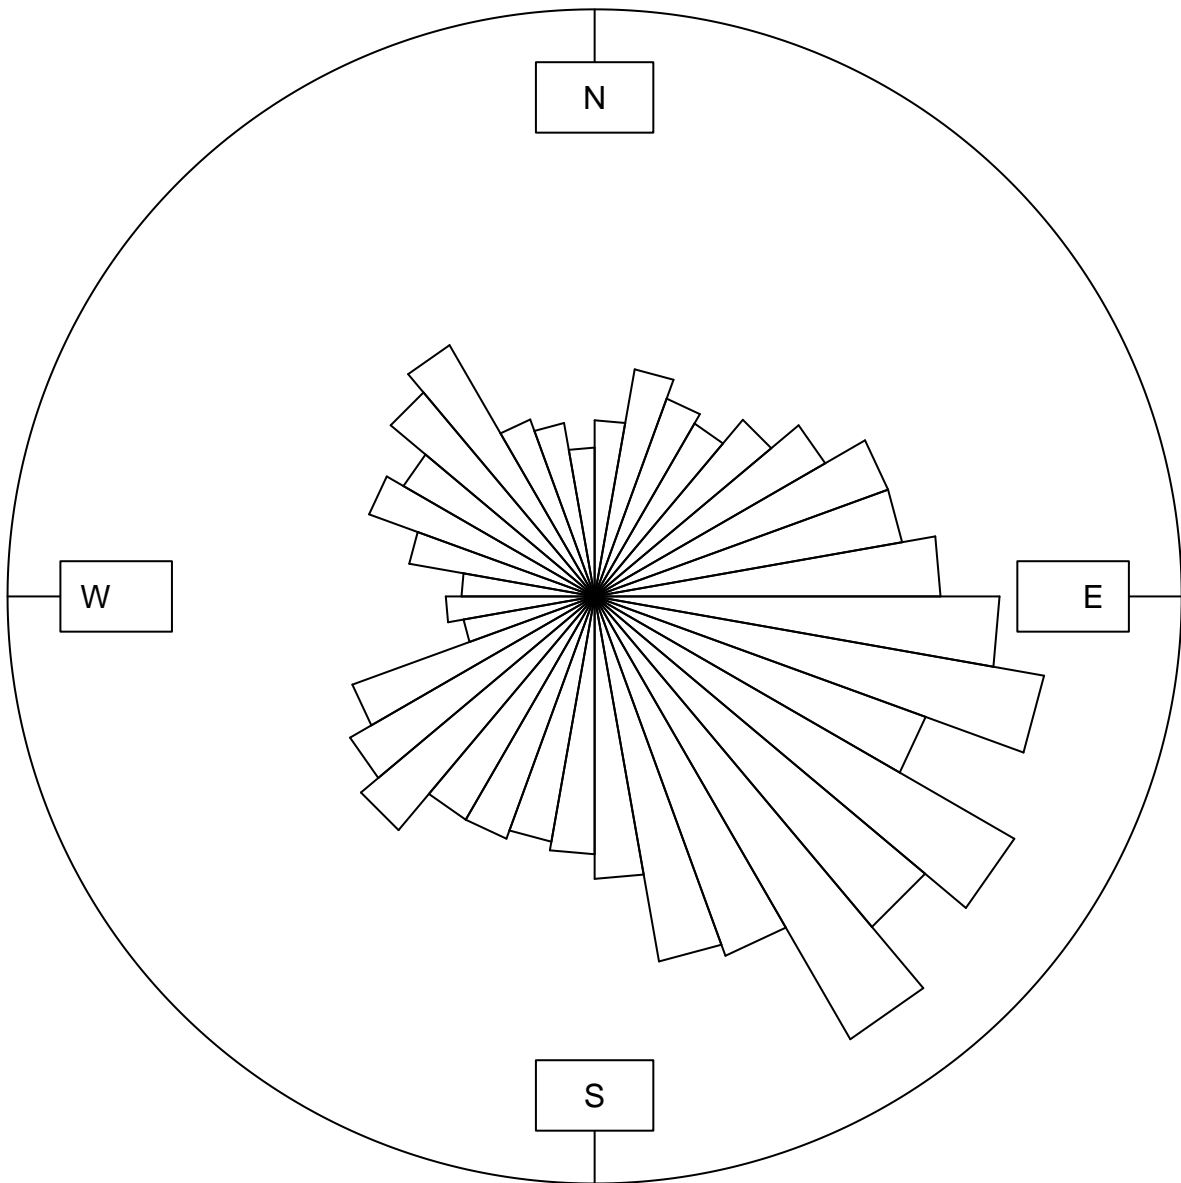



# bootstrap 425

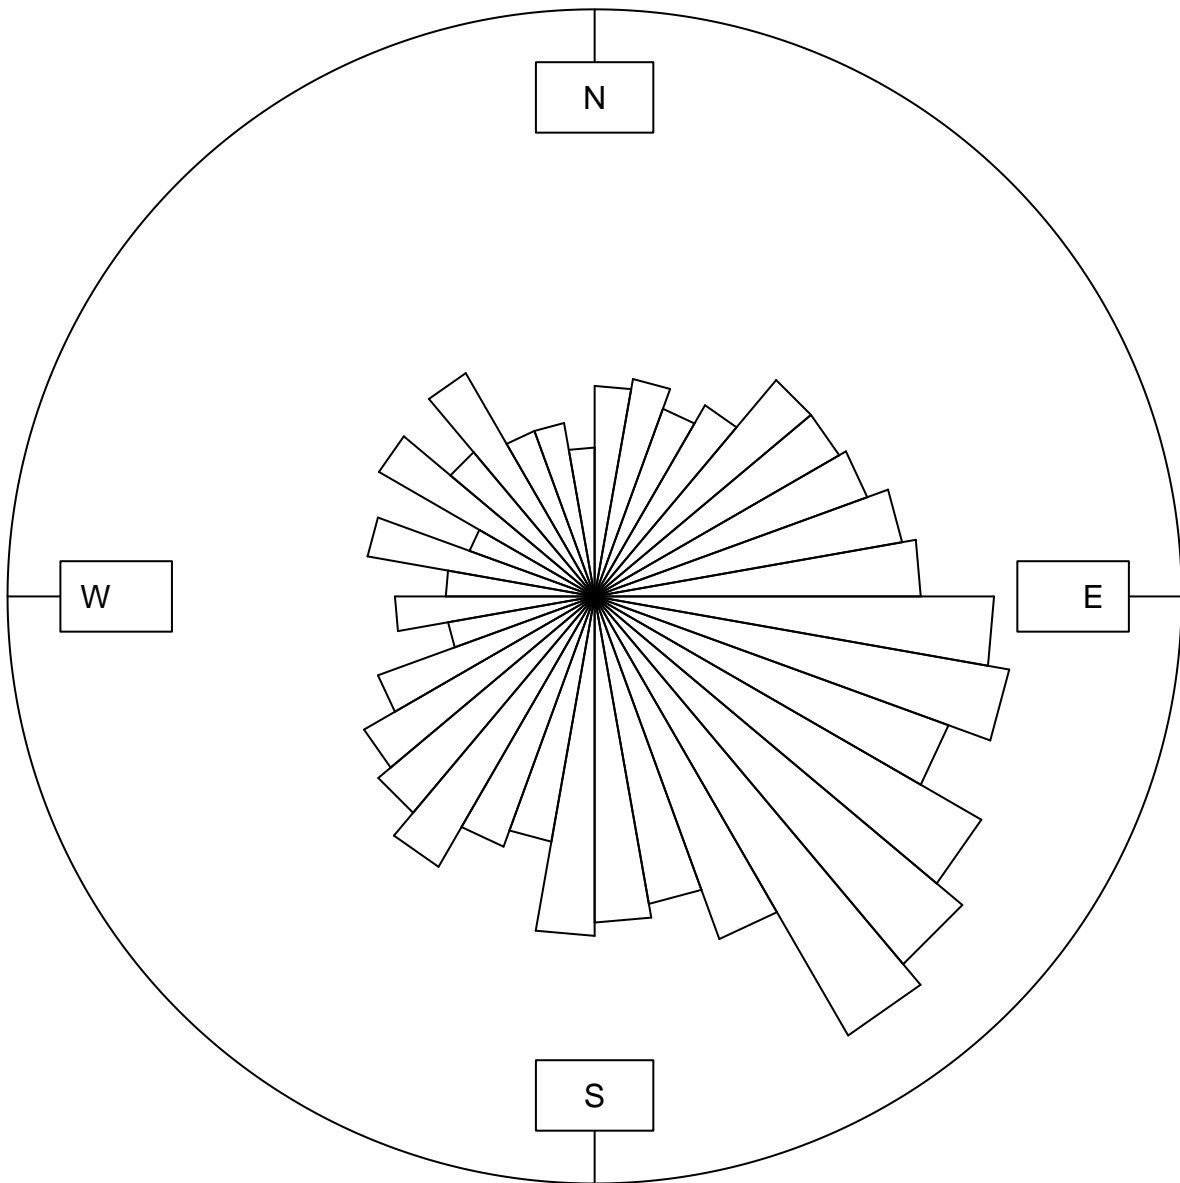

# bootstrap 426

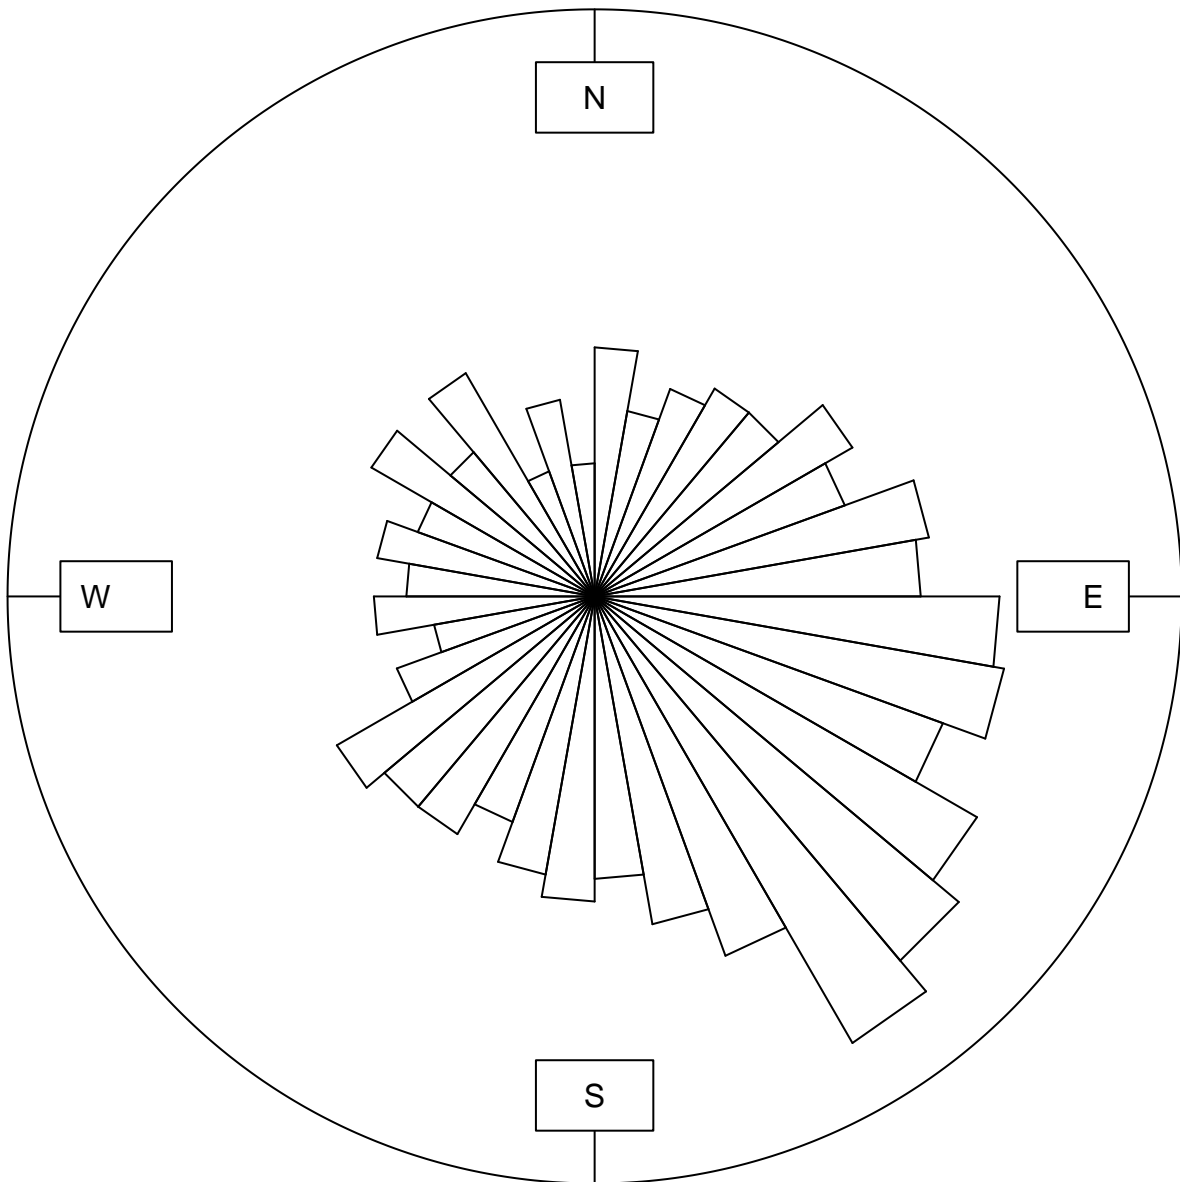

**bootstrap 427**

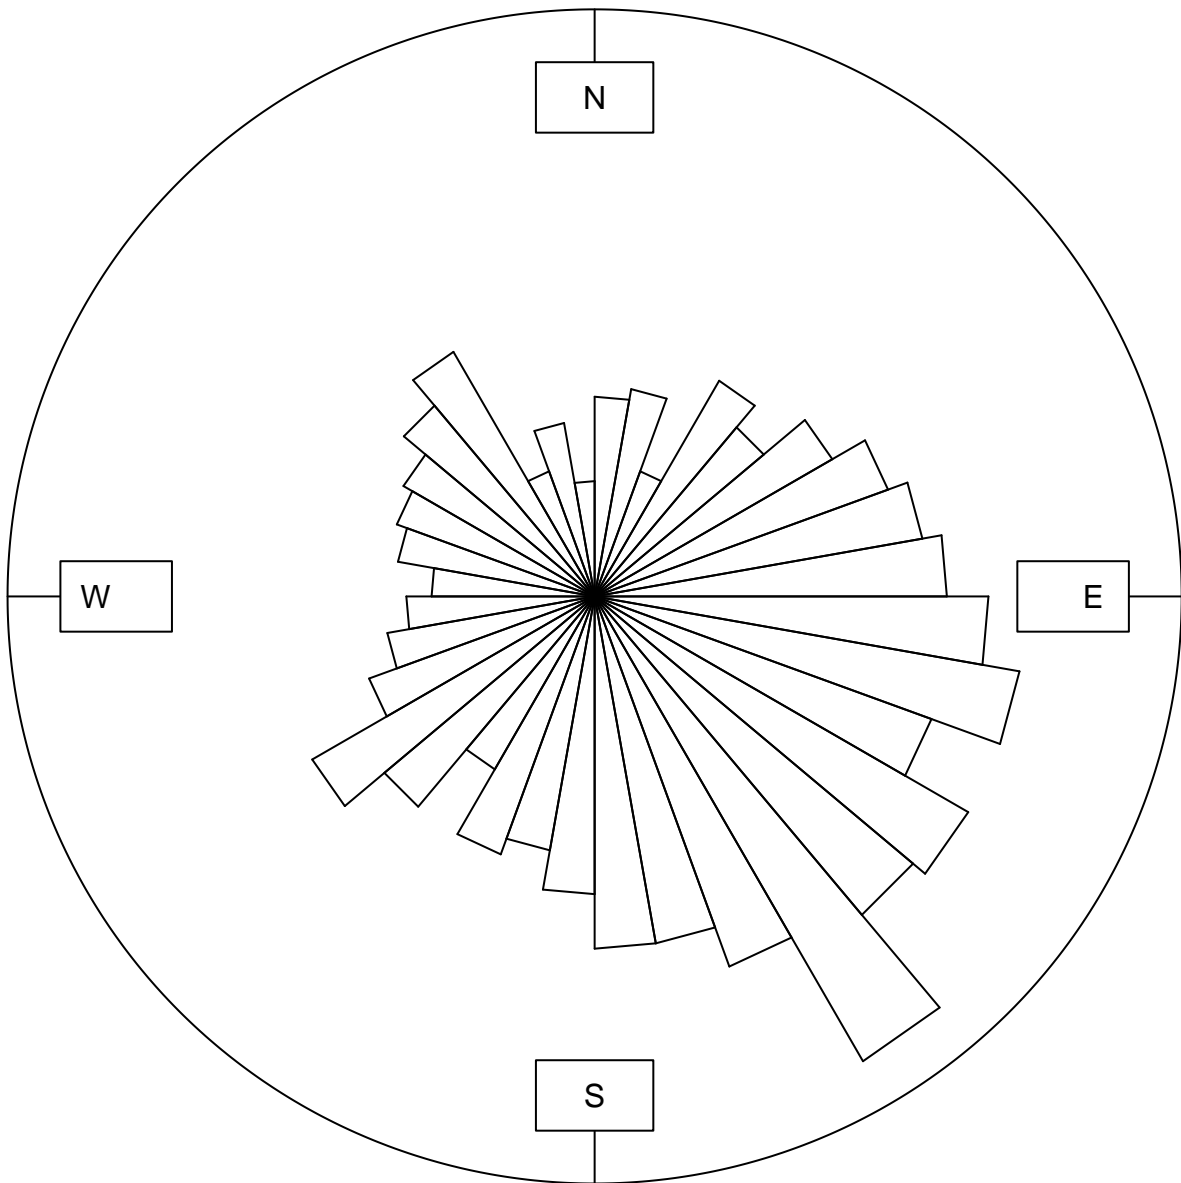

# bootstrap 428

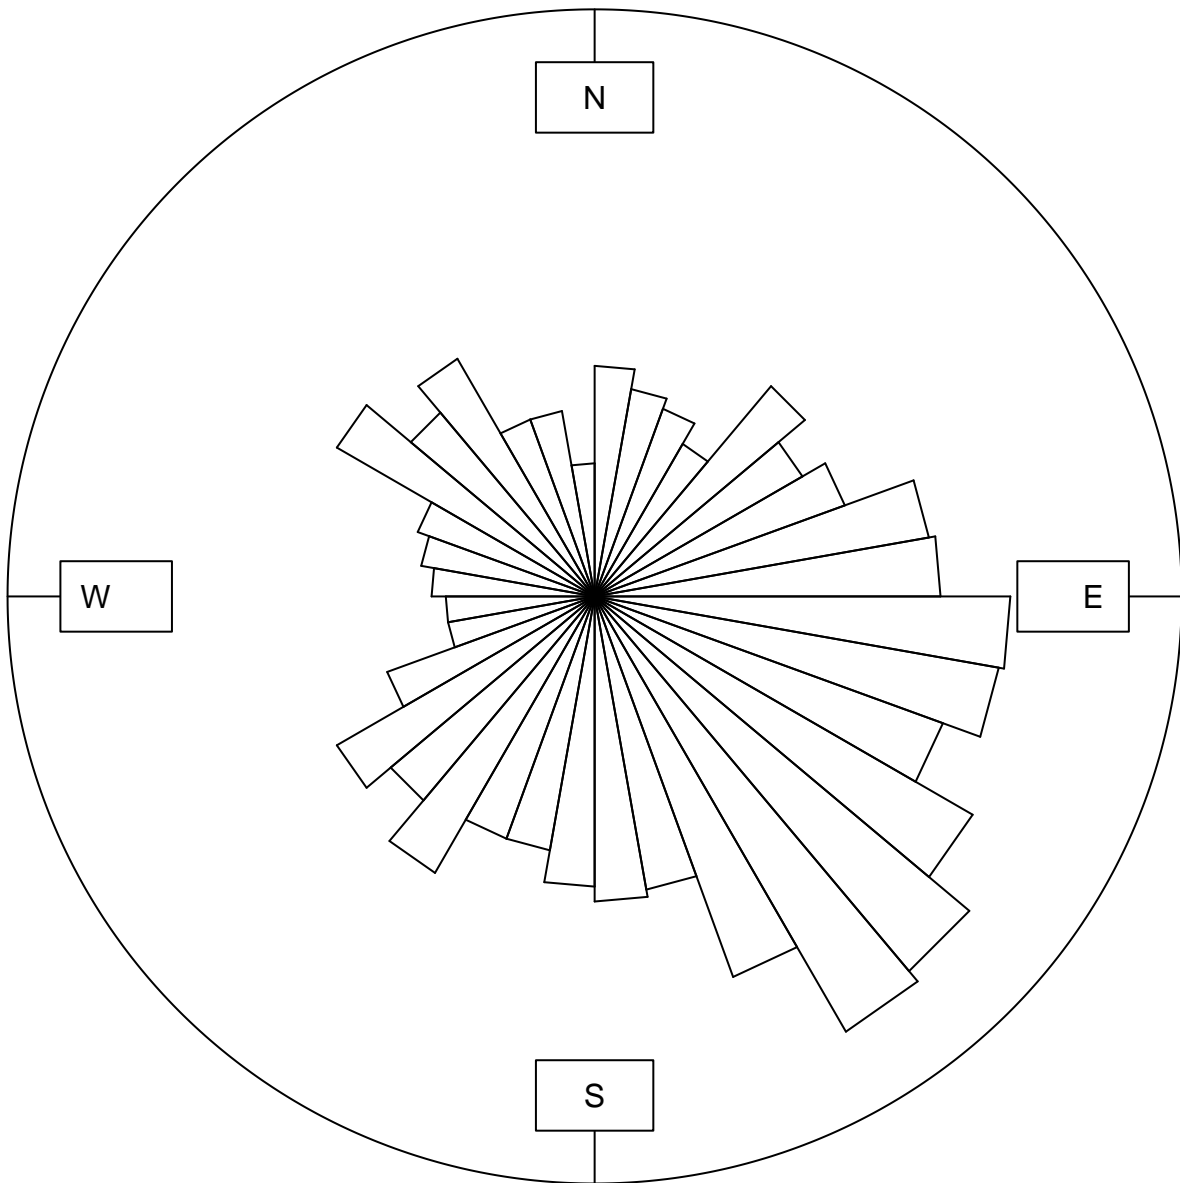

# bootstrap 429

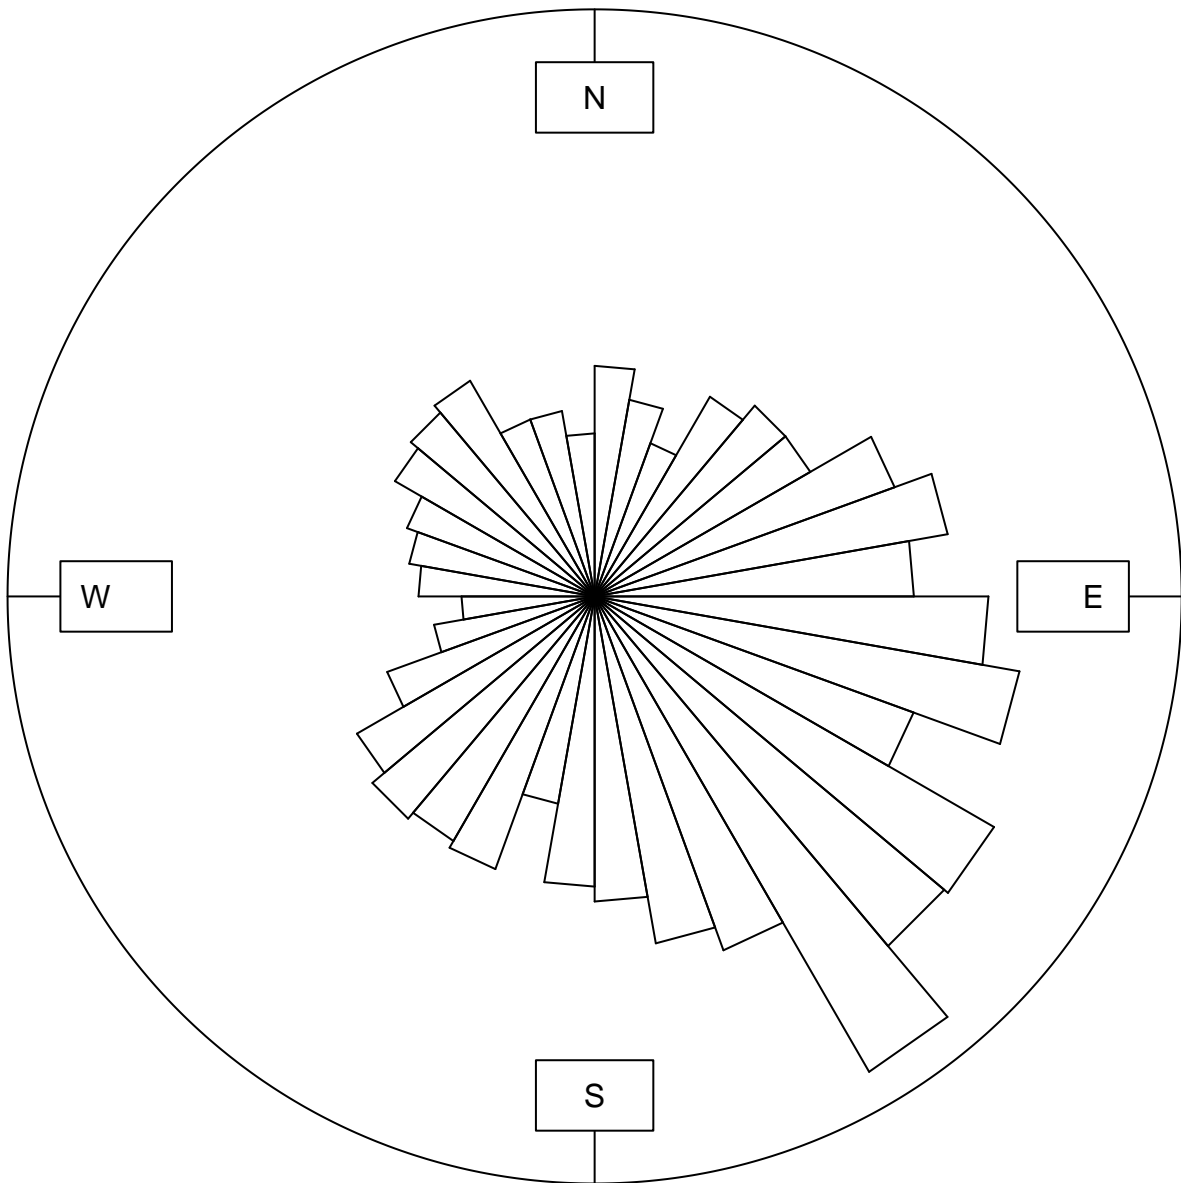

# bootstrap 430

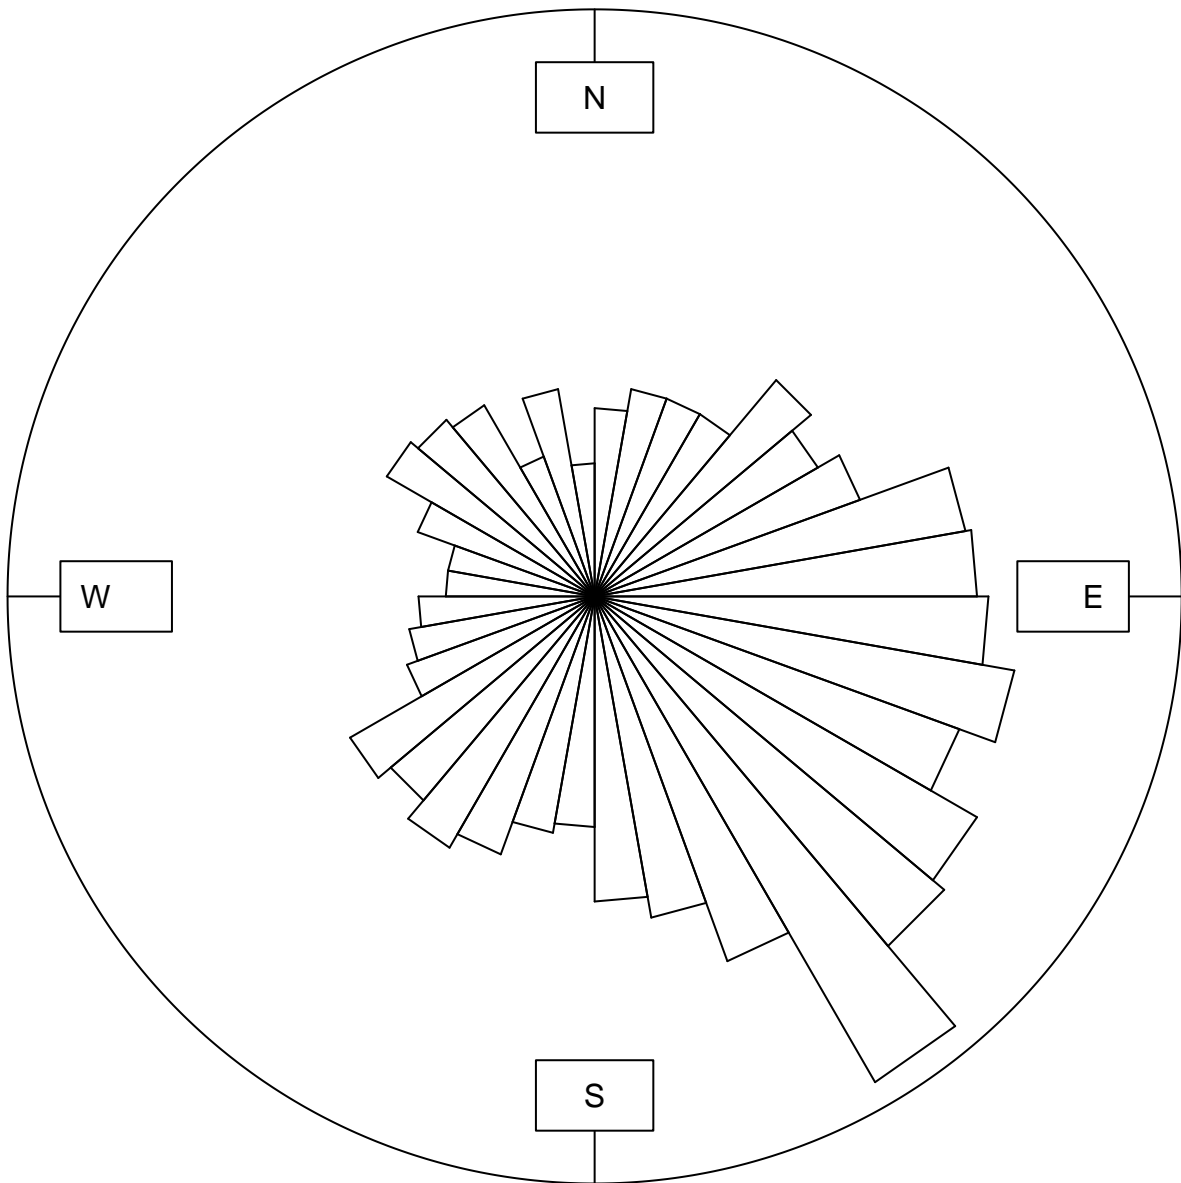

# bootstrap 431

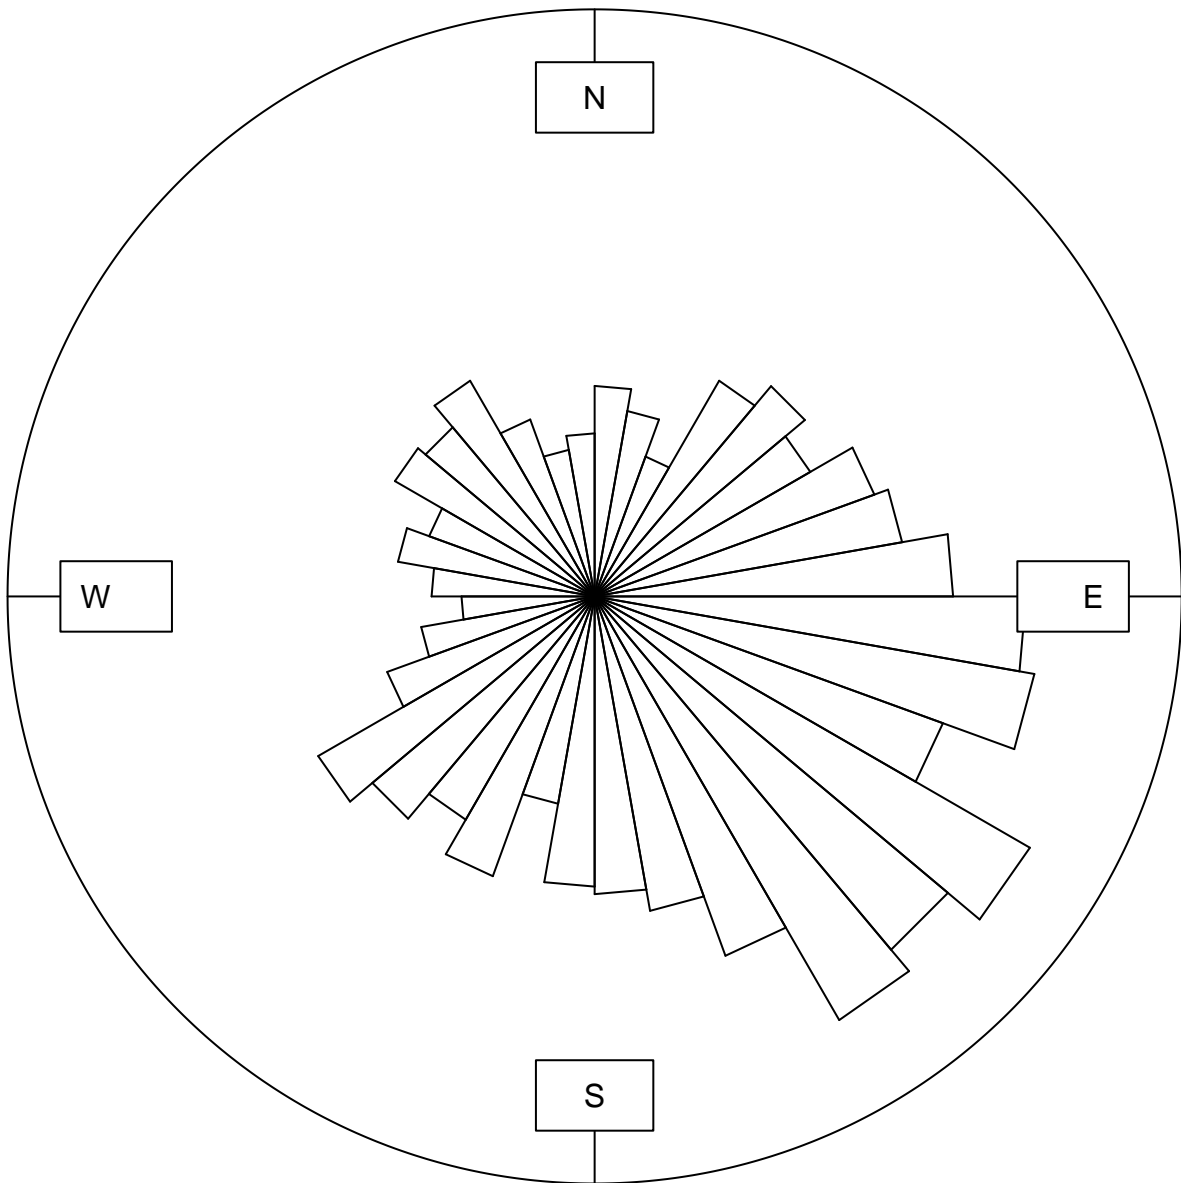

# bootstrap 432

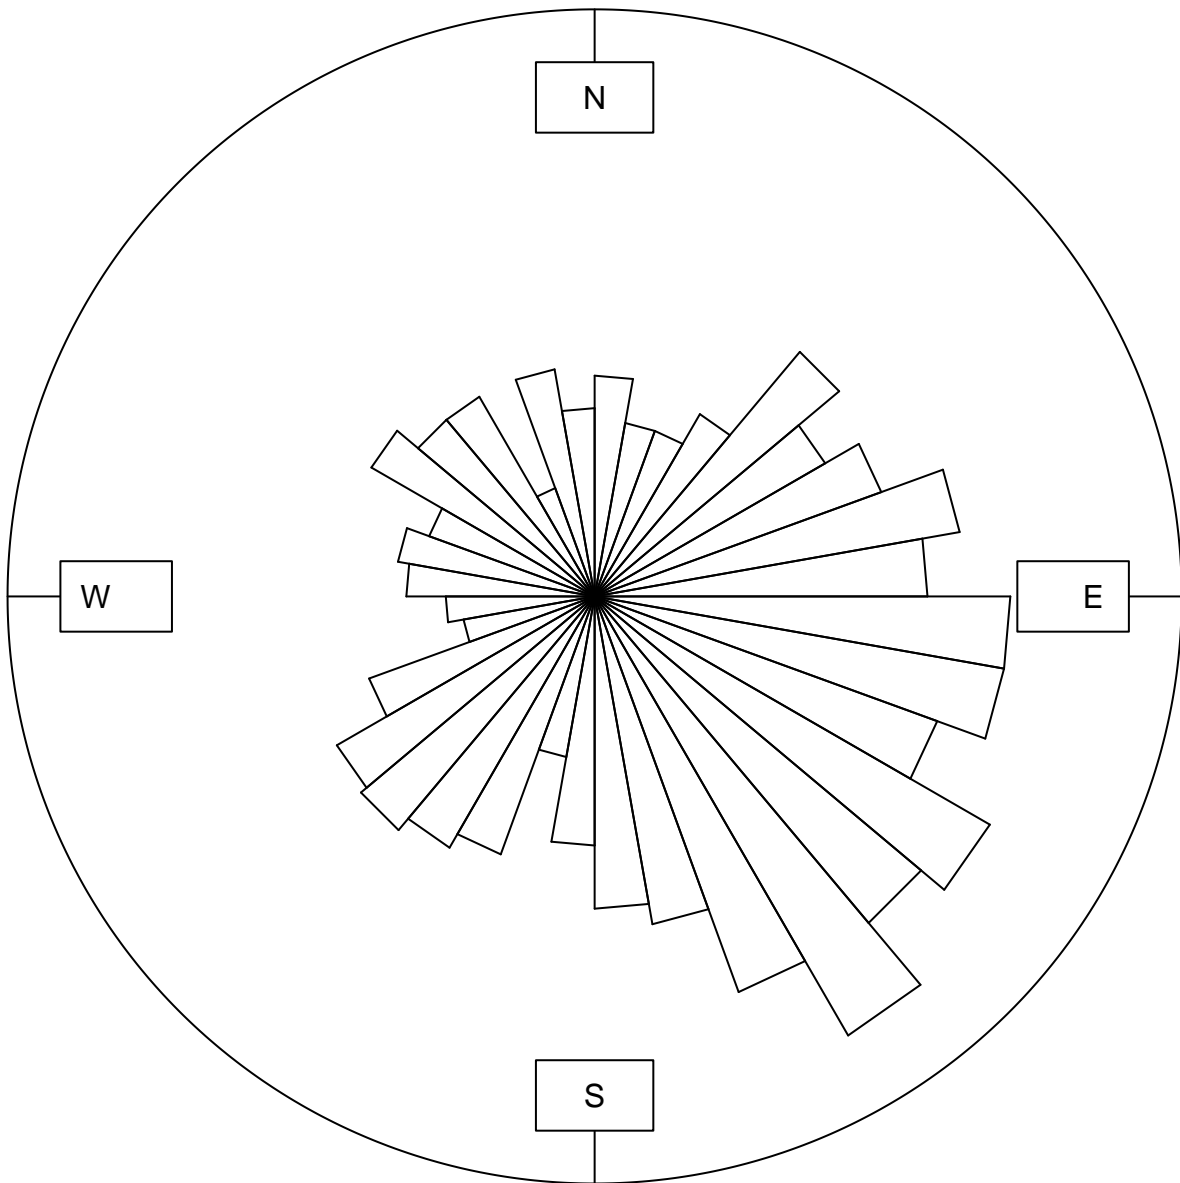



# bootstrap 433

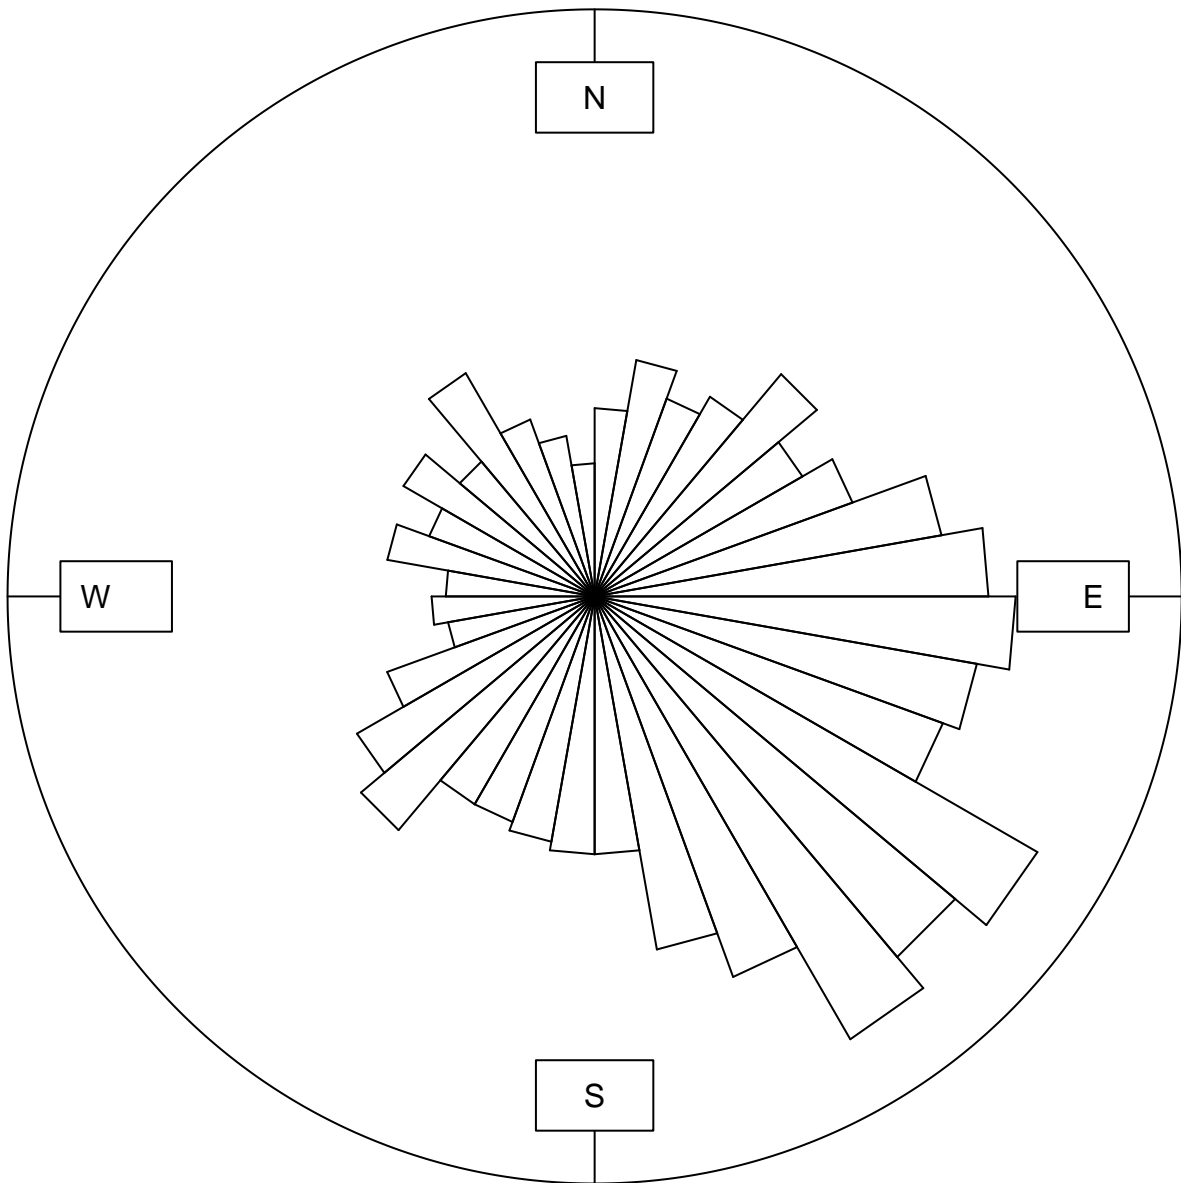

# bootstrap 434

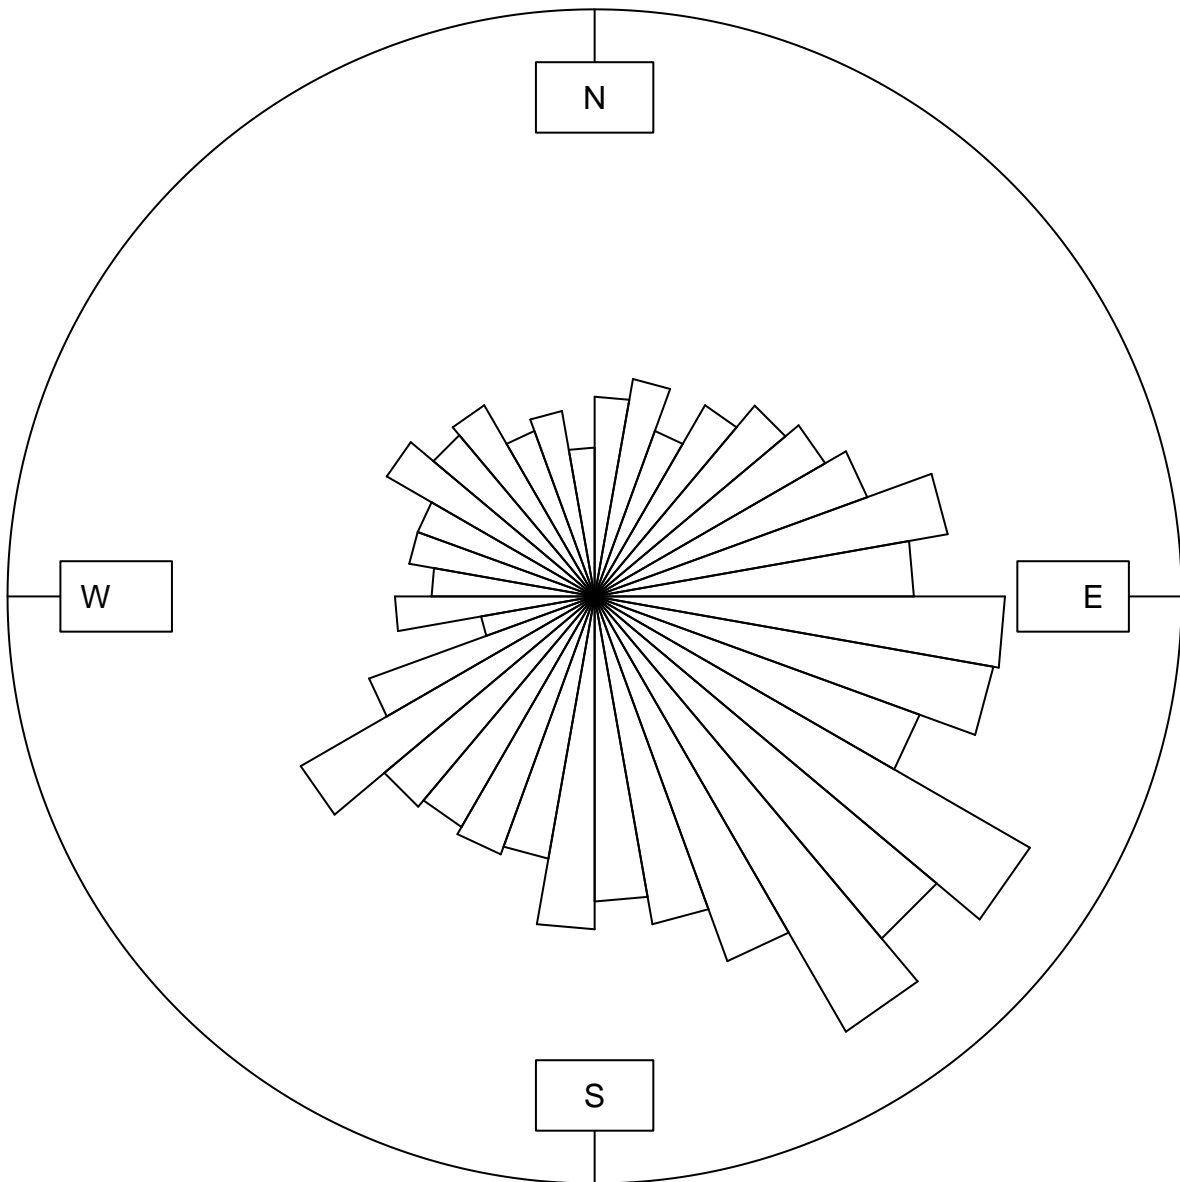

# bootstrap 435

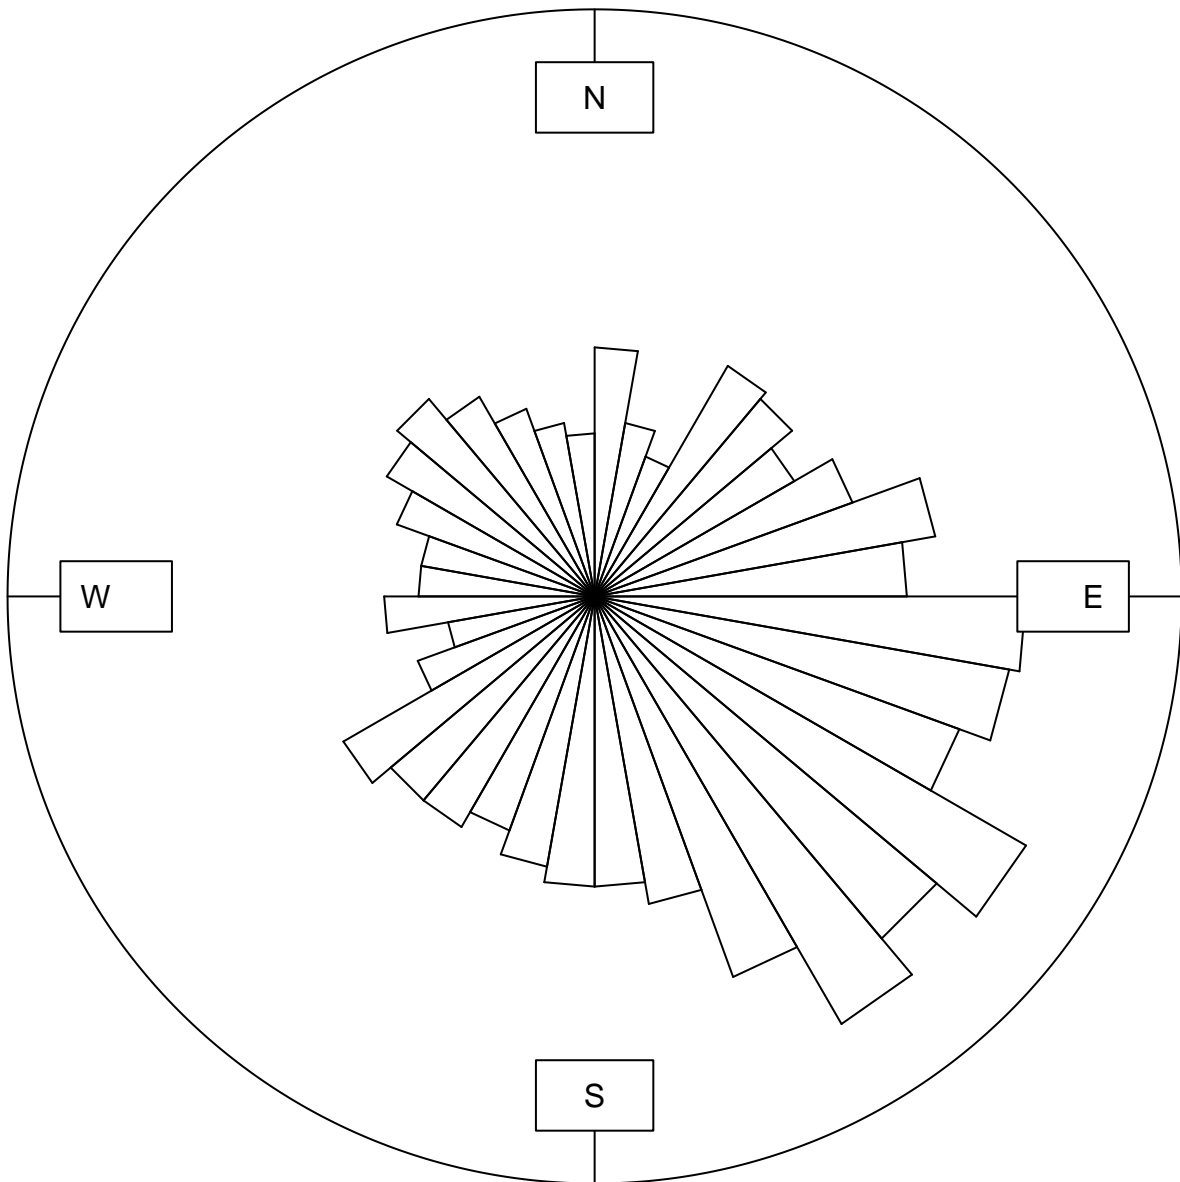

# bootstrap 436

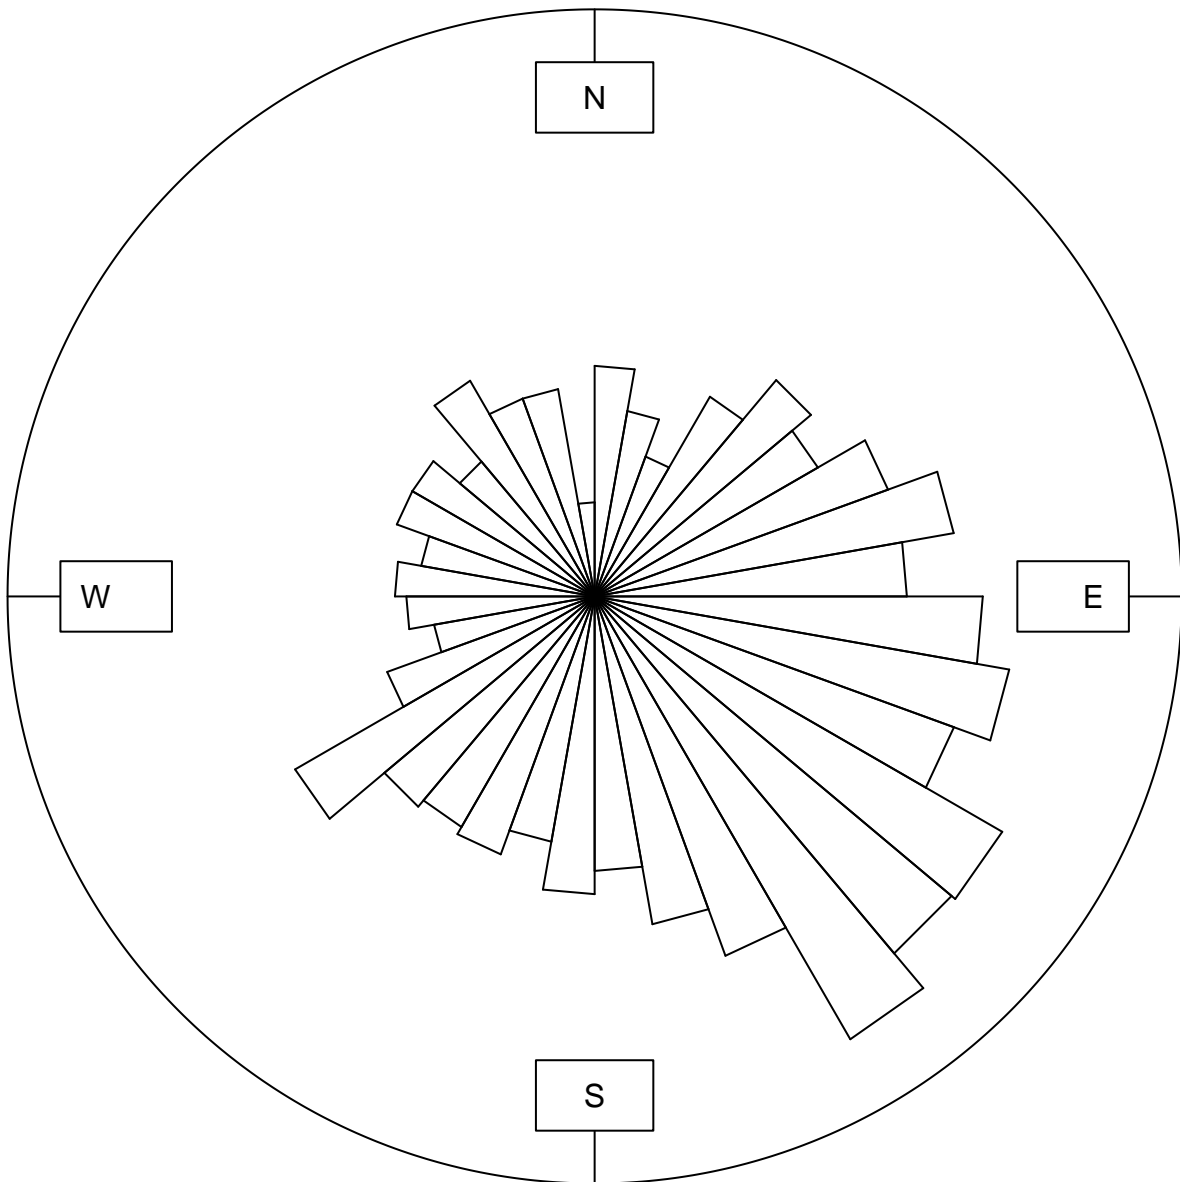

# bootstrap 437

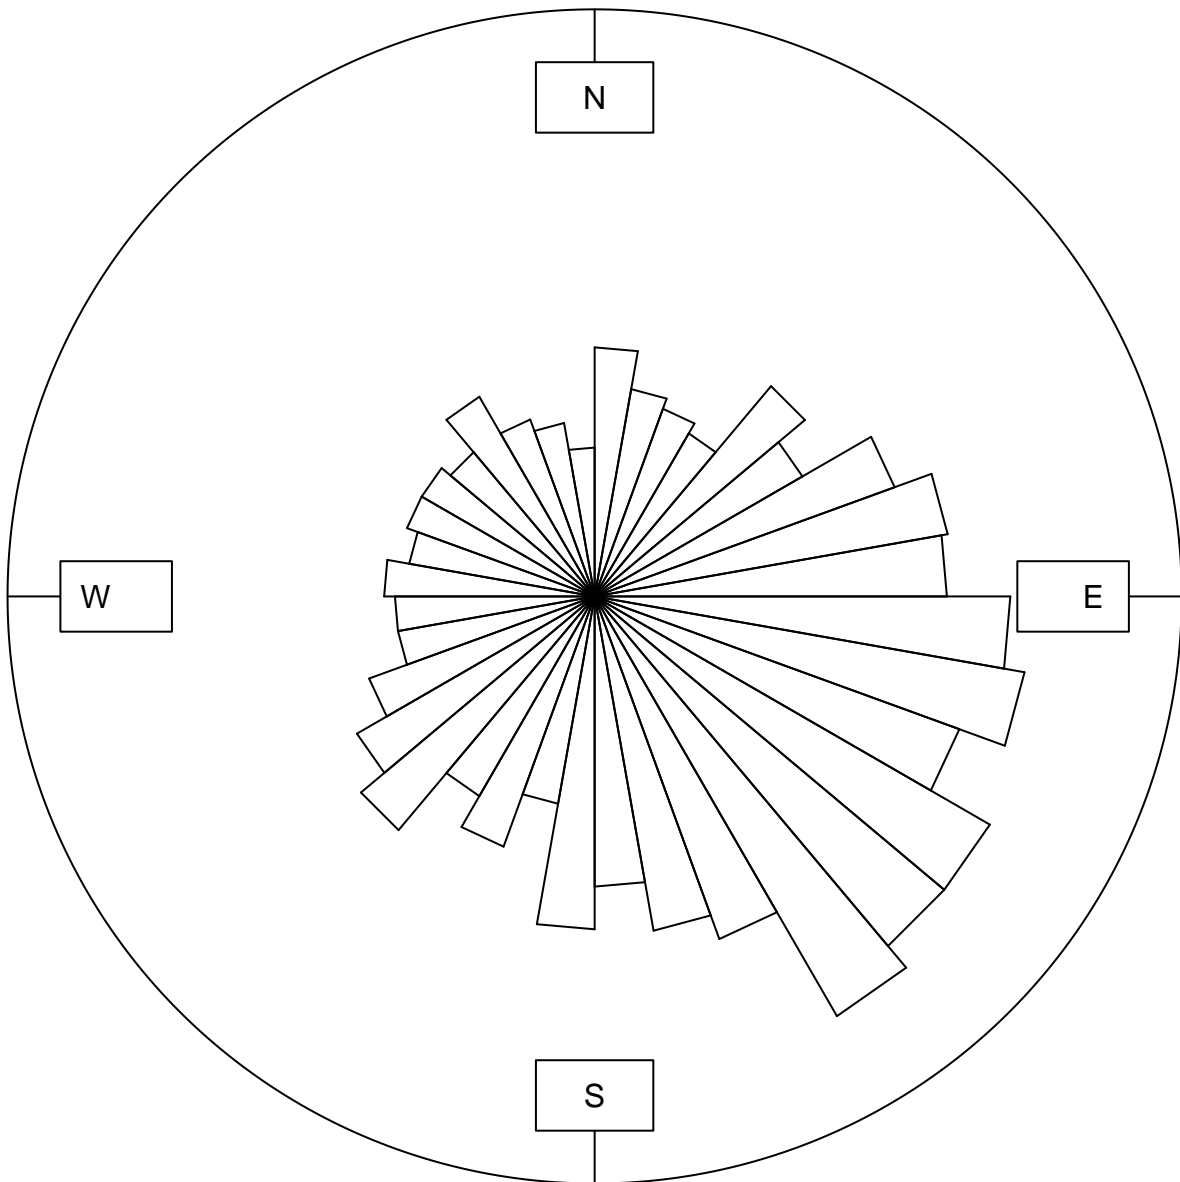

# bootstrap 438

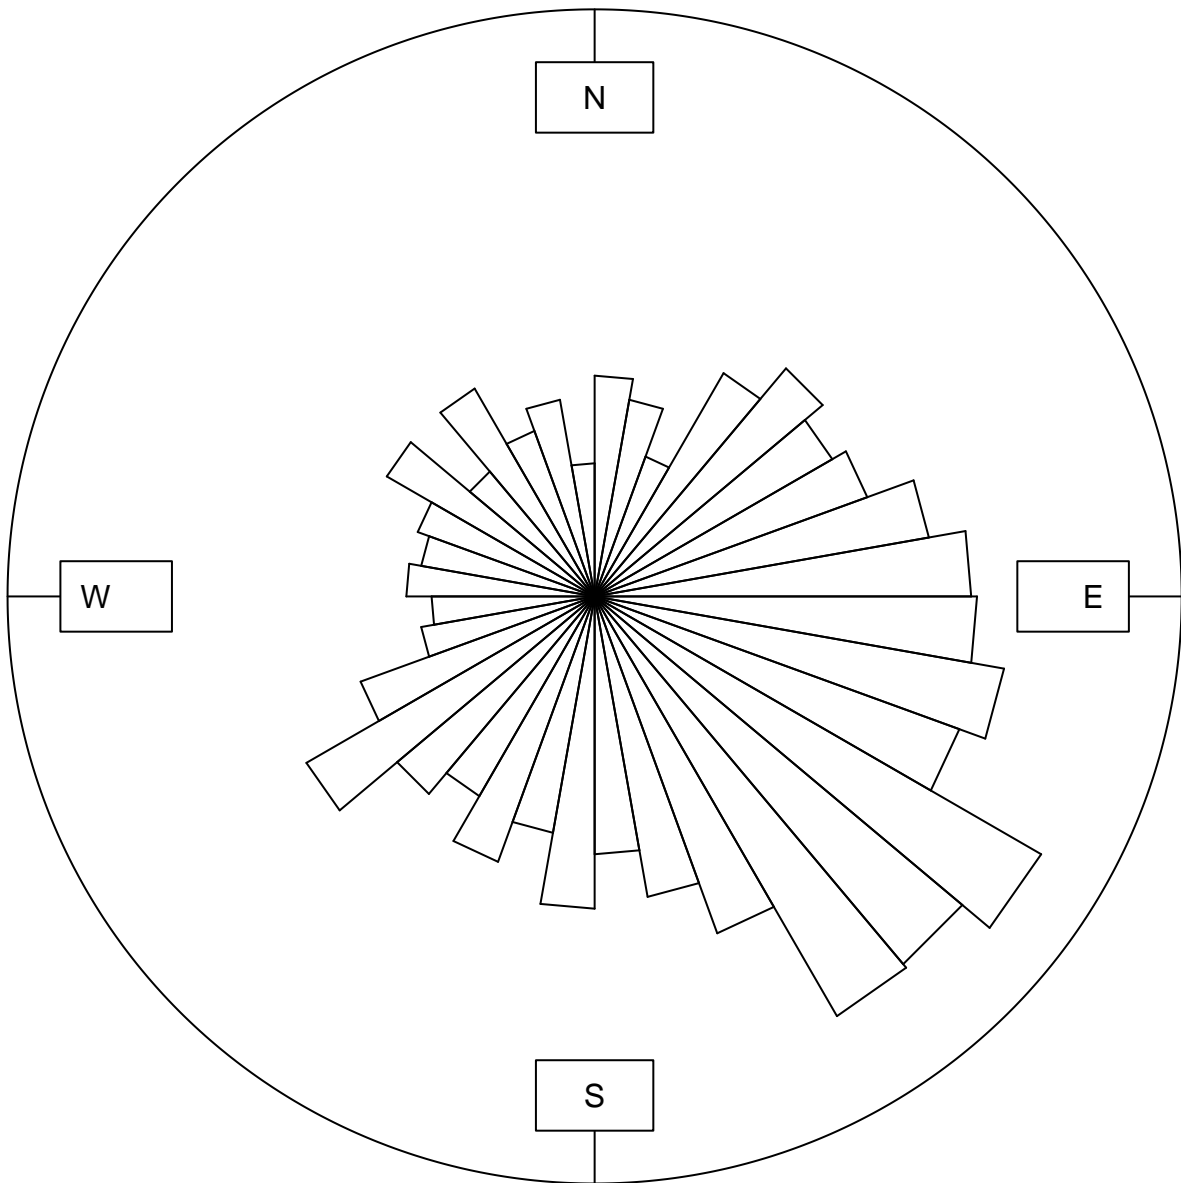

# bootstrap 439

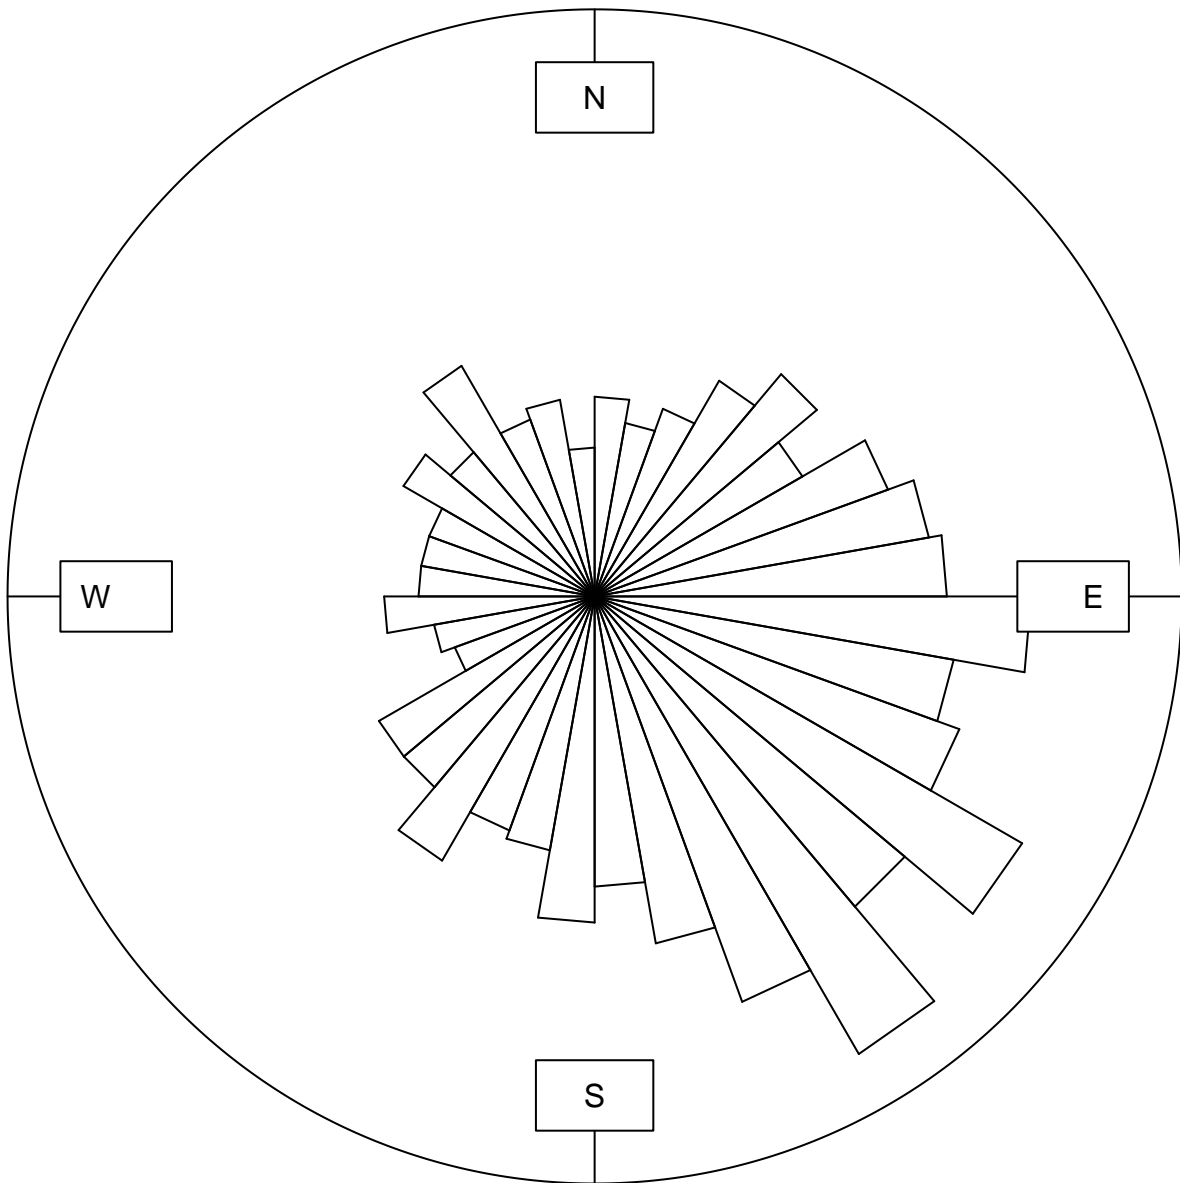

# bootstrap 440

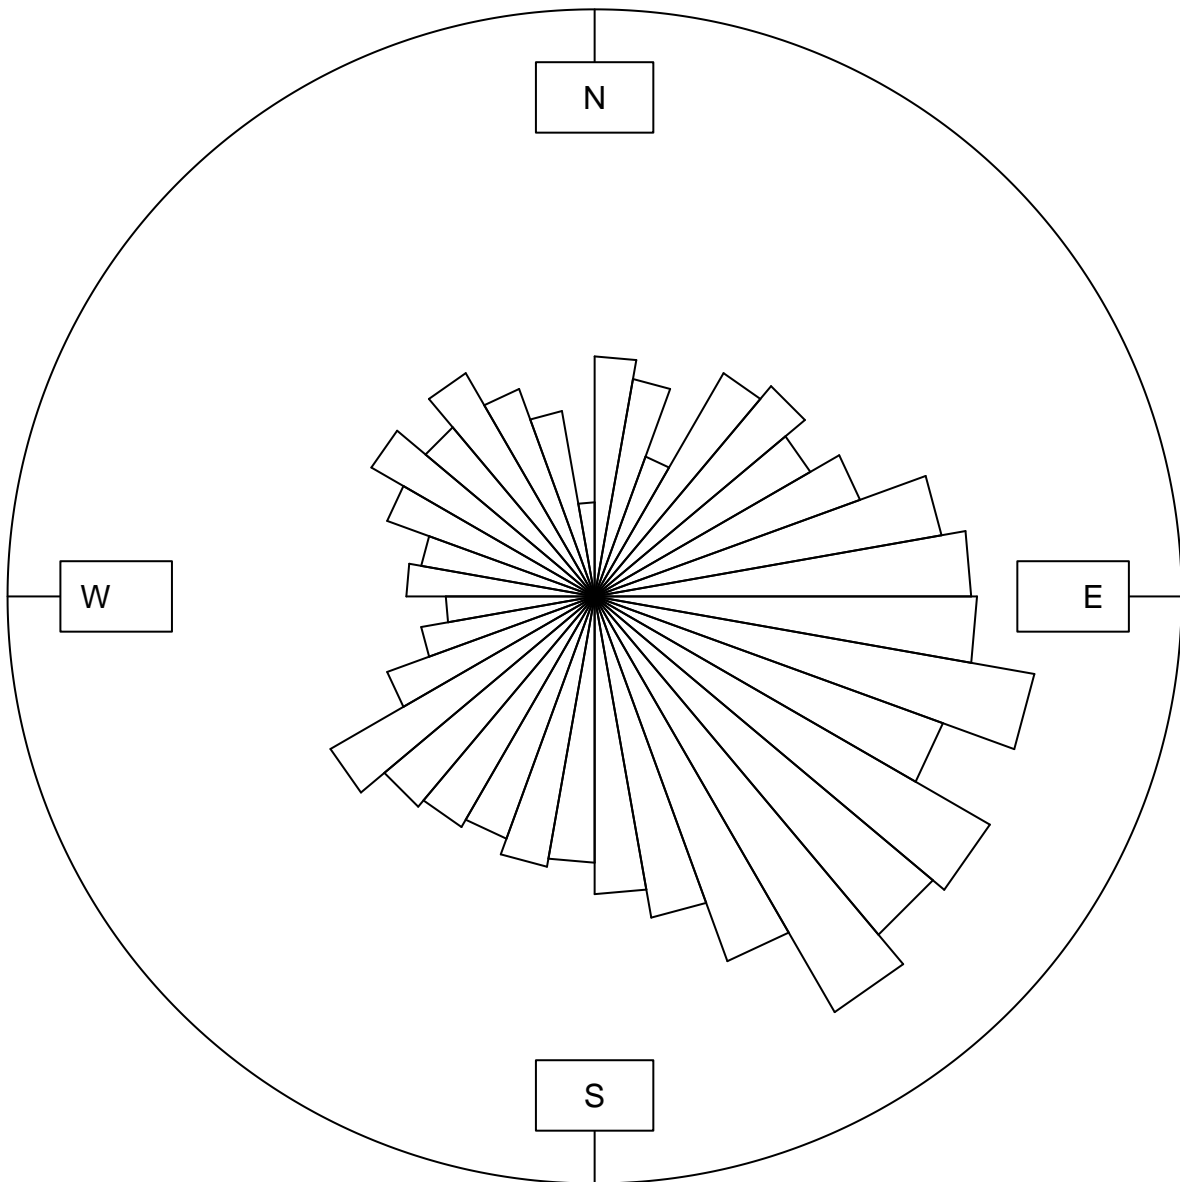



# bootstrap 441

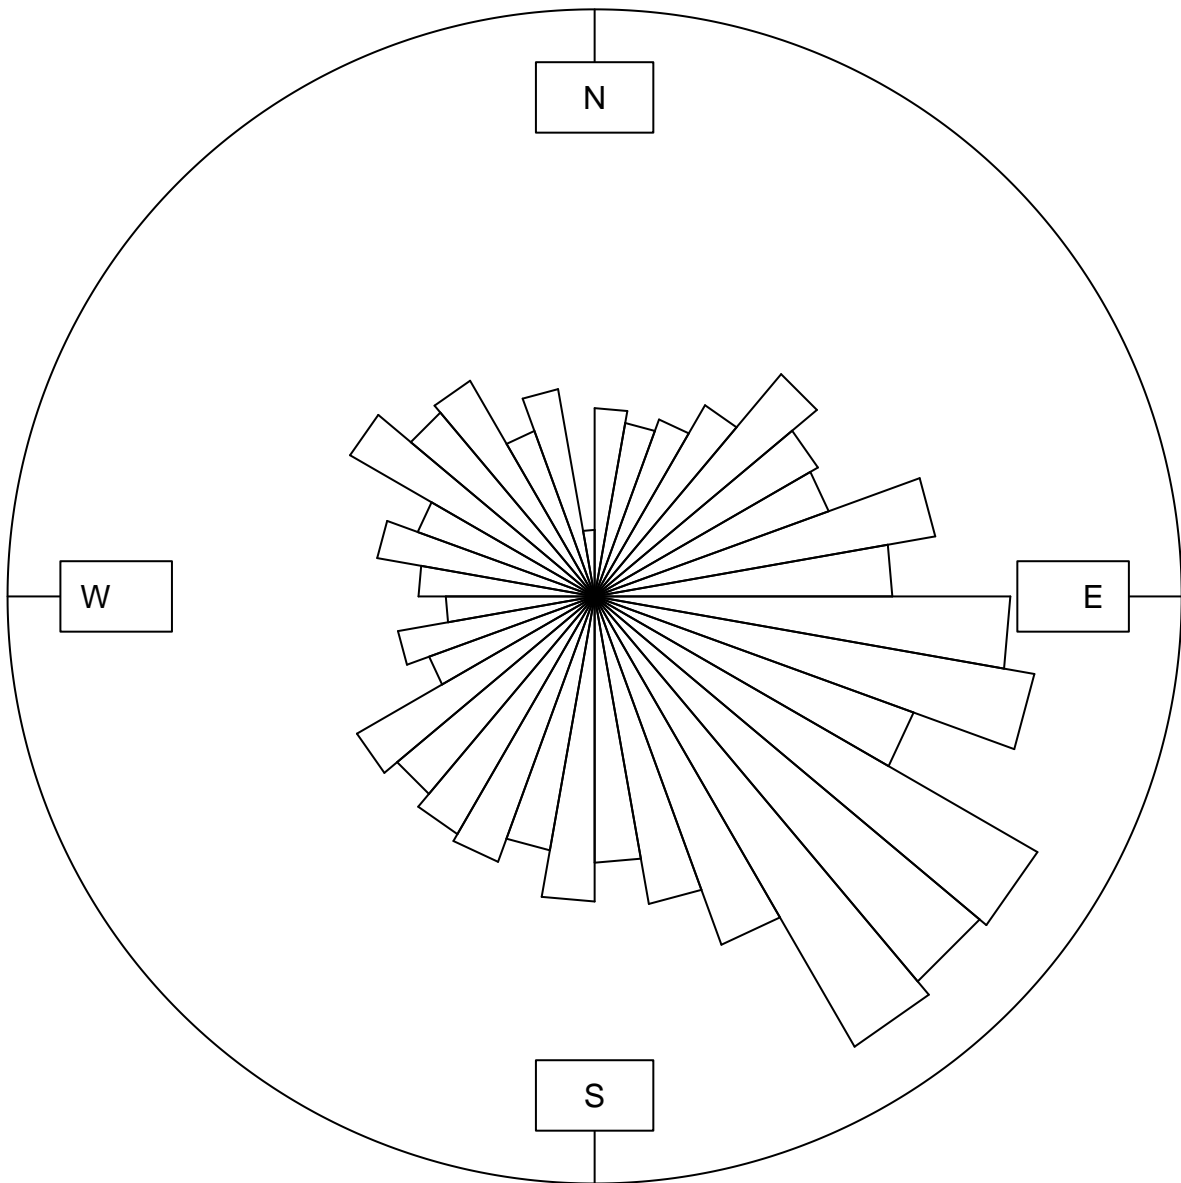

# bootstrap 442

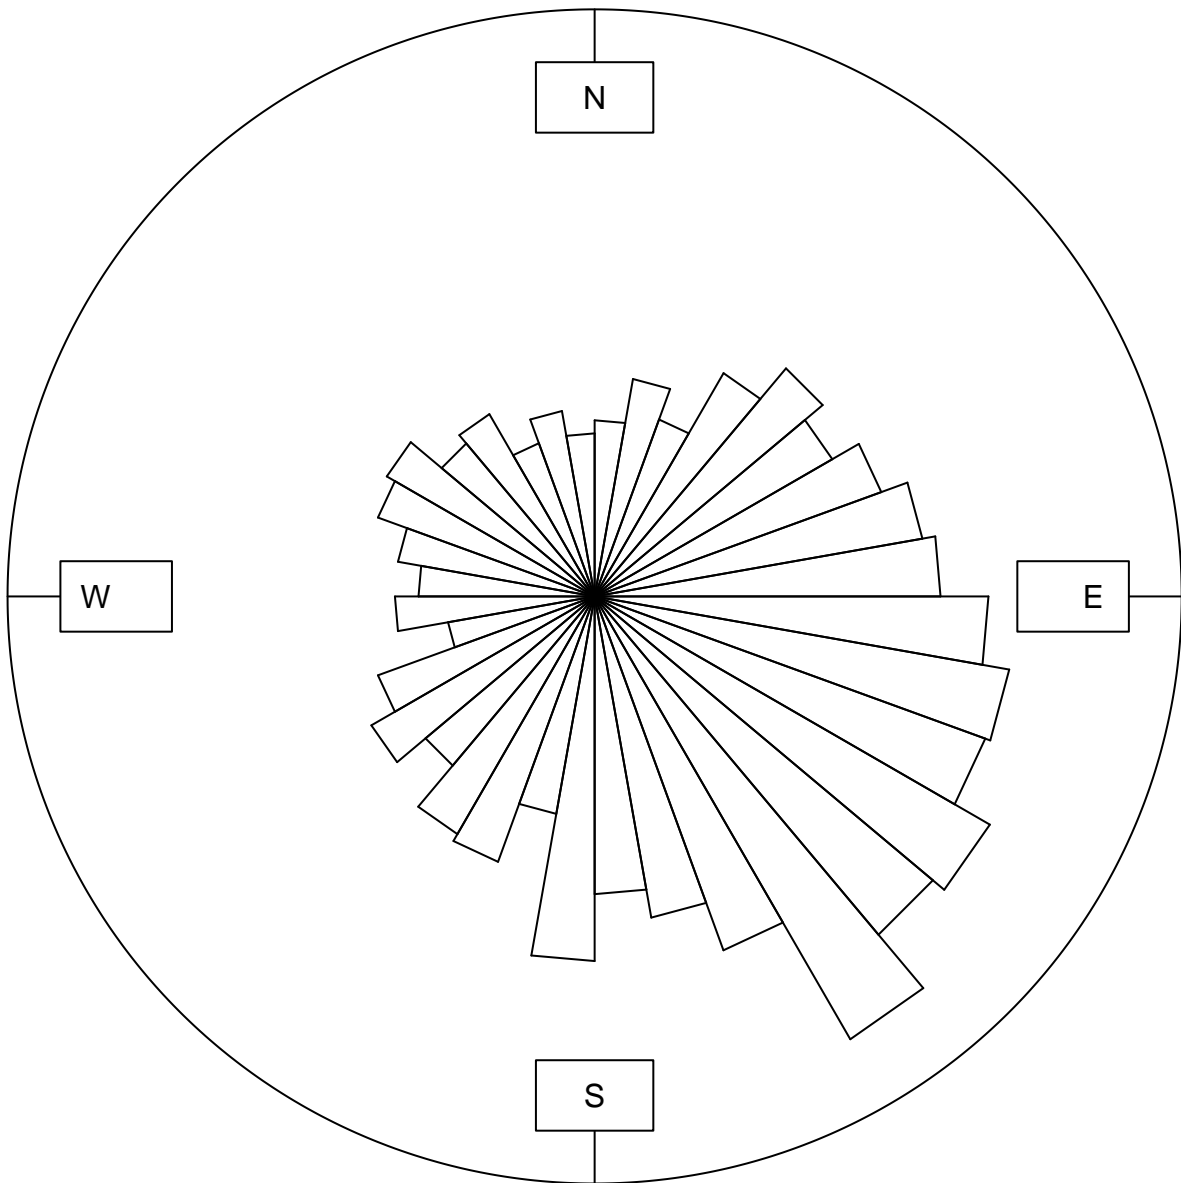

# bootstrap 443

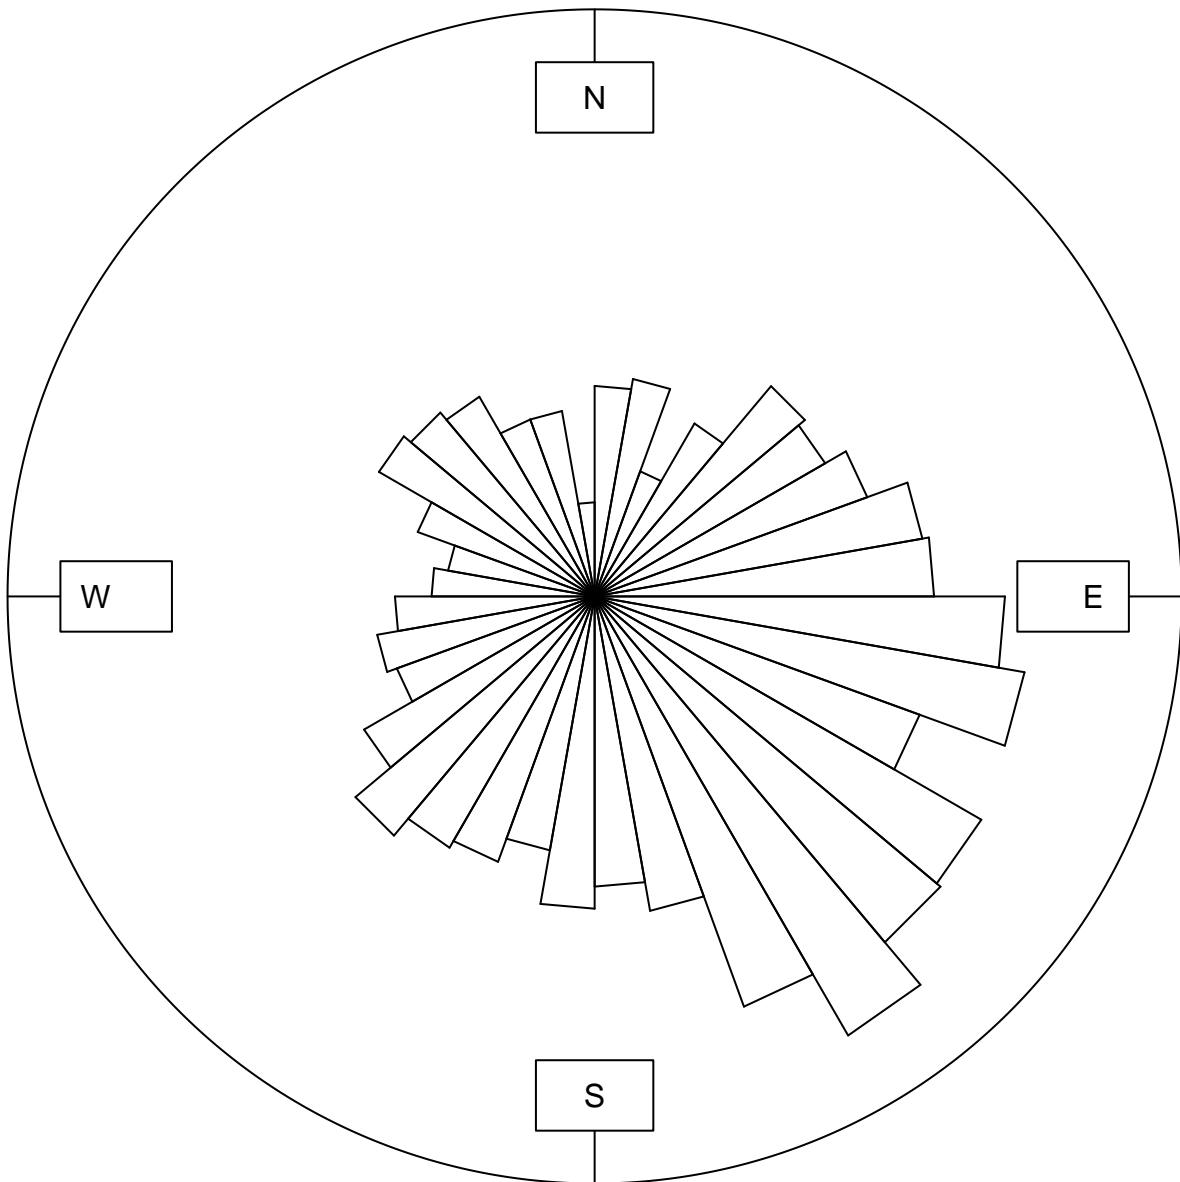

# bootstrap 444

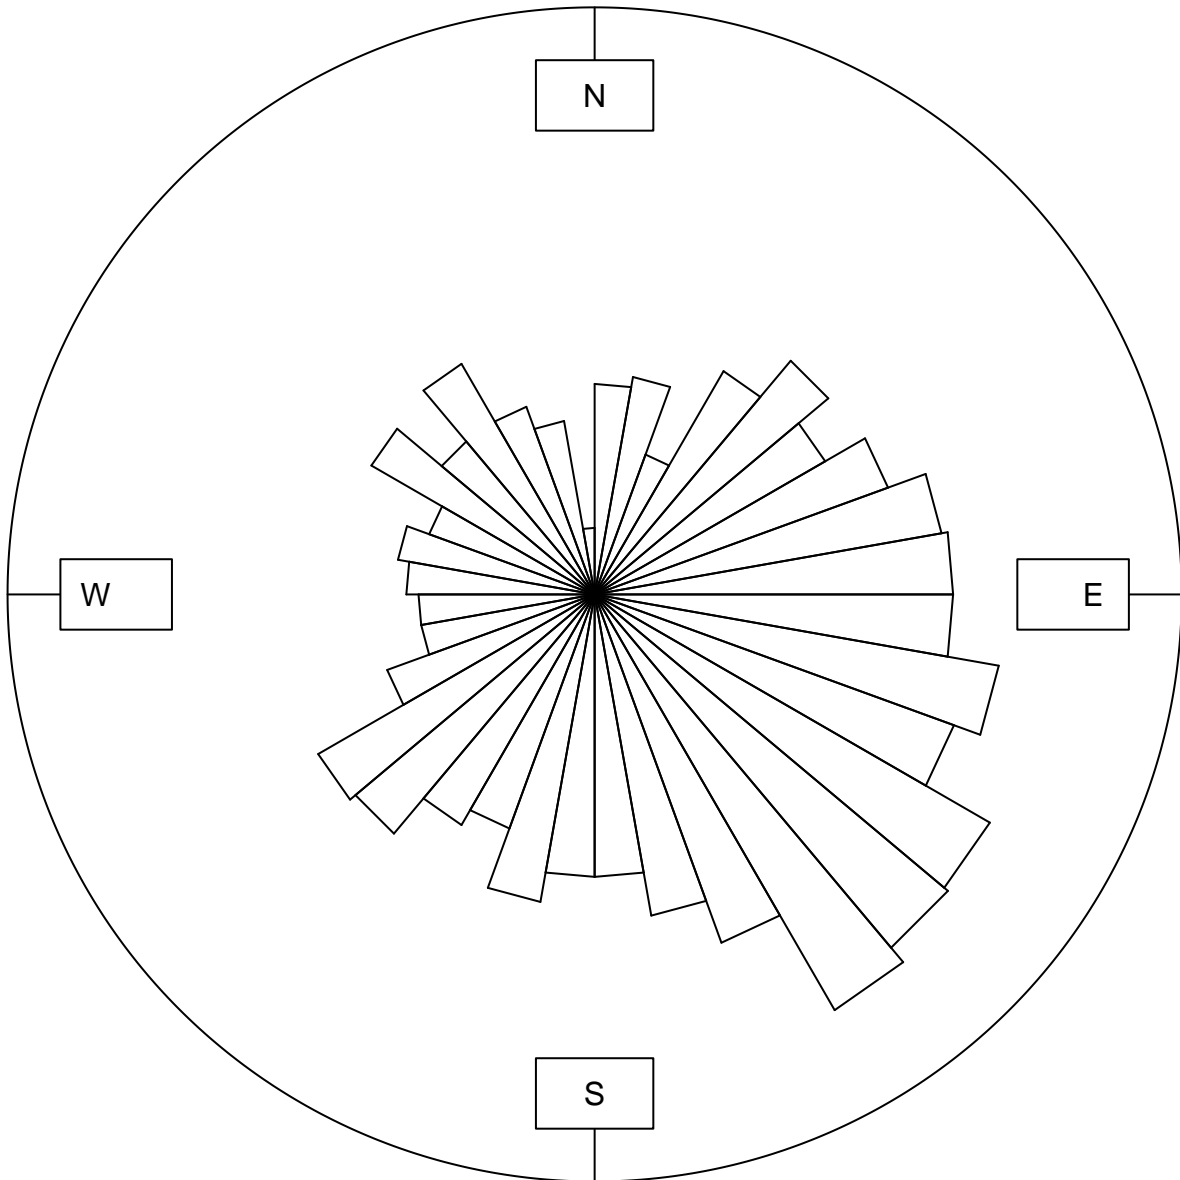

# bootstrap 445

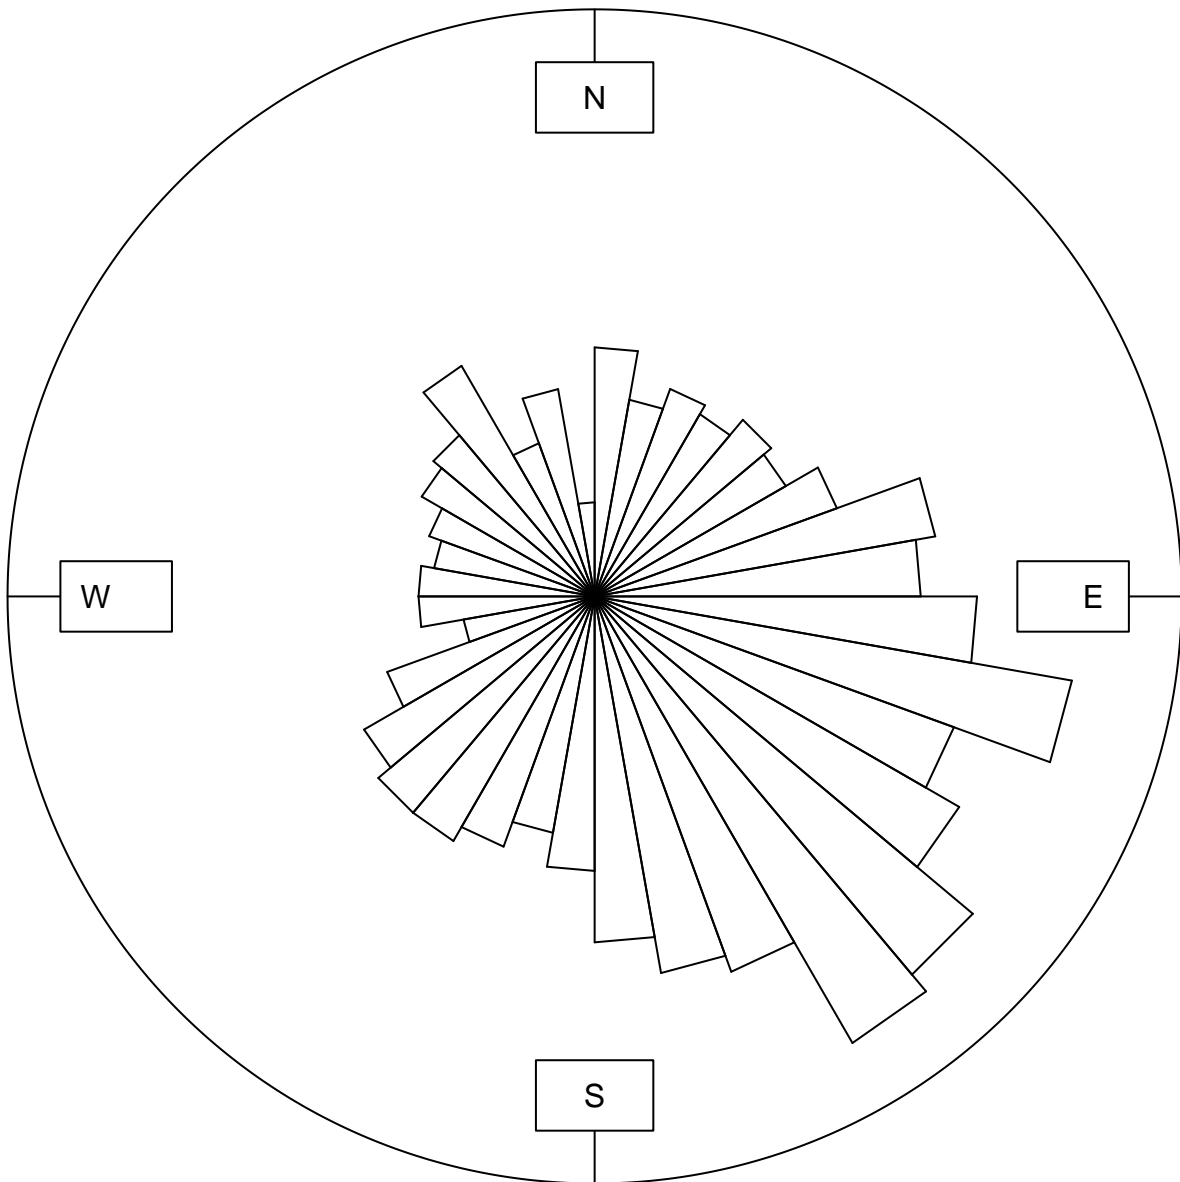

# bootstrap 446

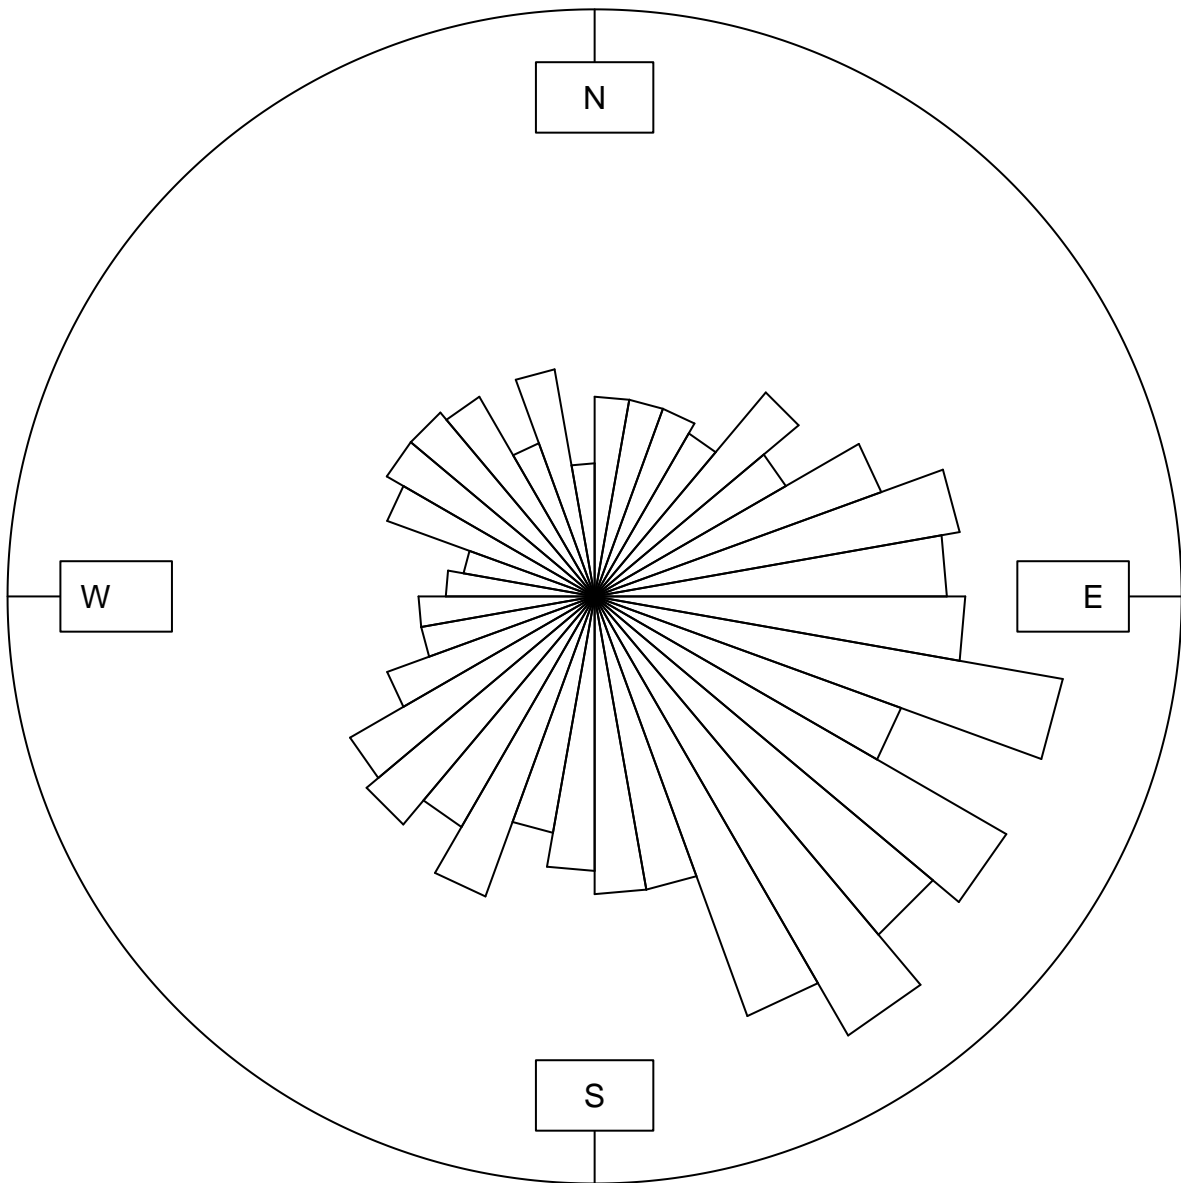

# bootstrap 447

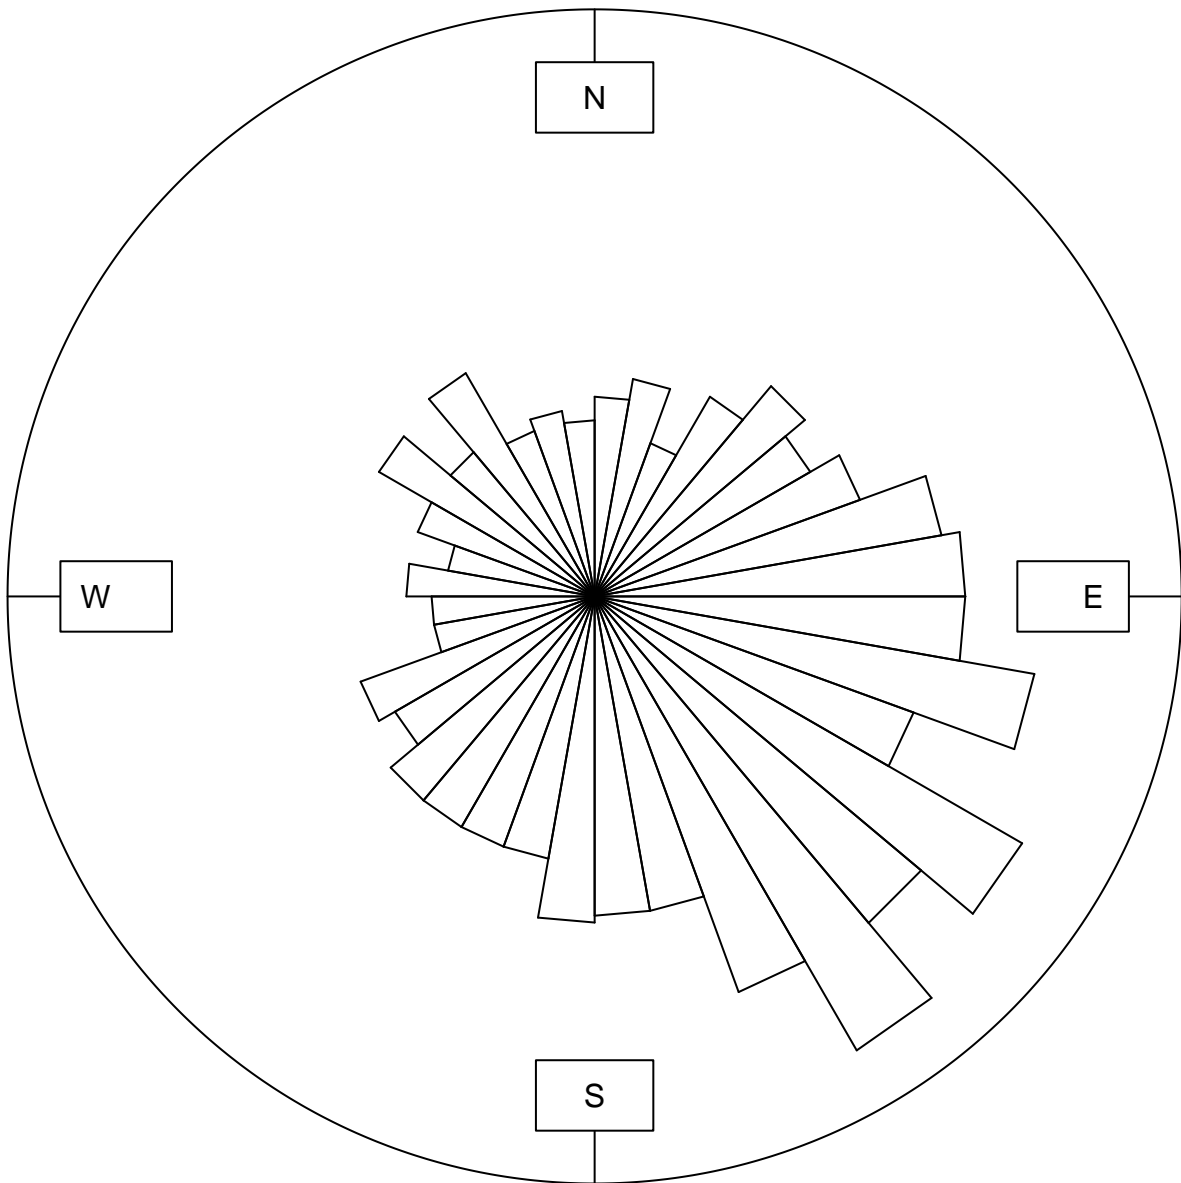

# bootstrap 448

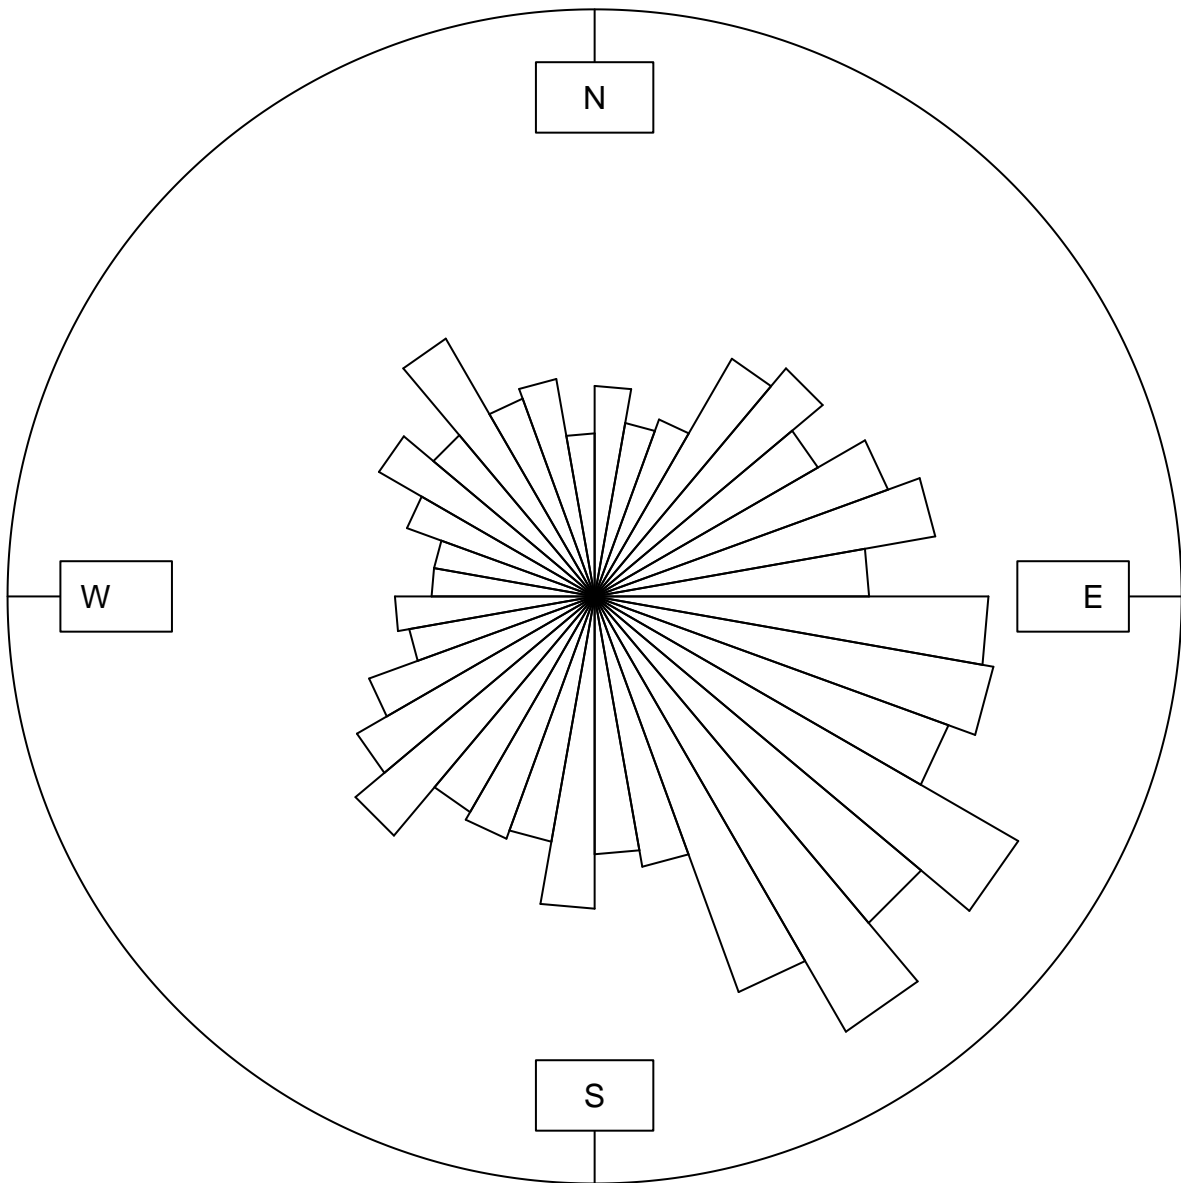



# bootstrap 449

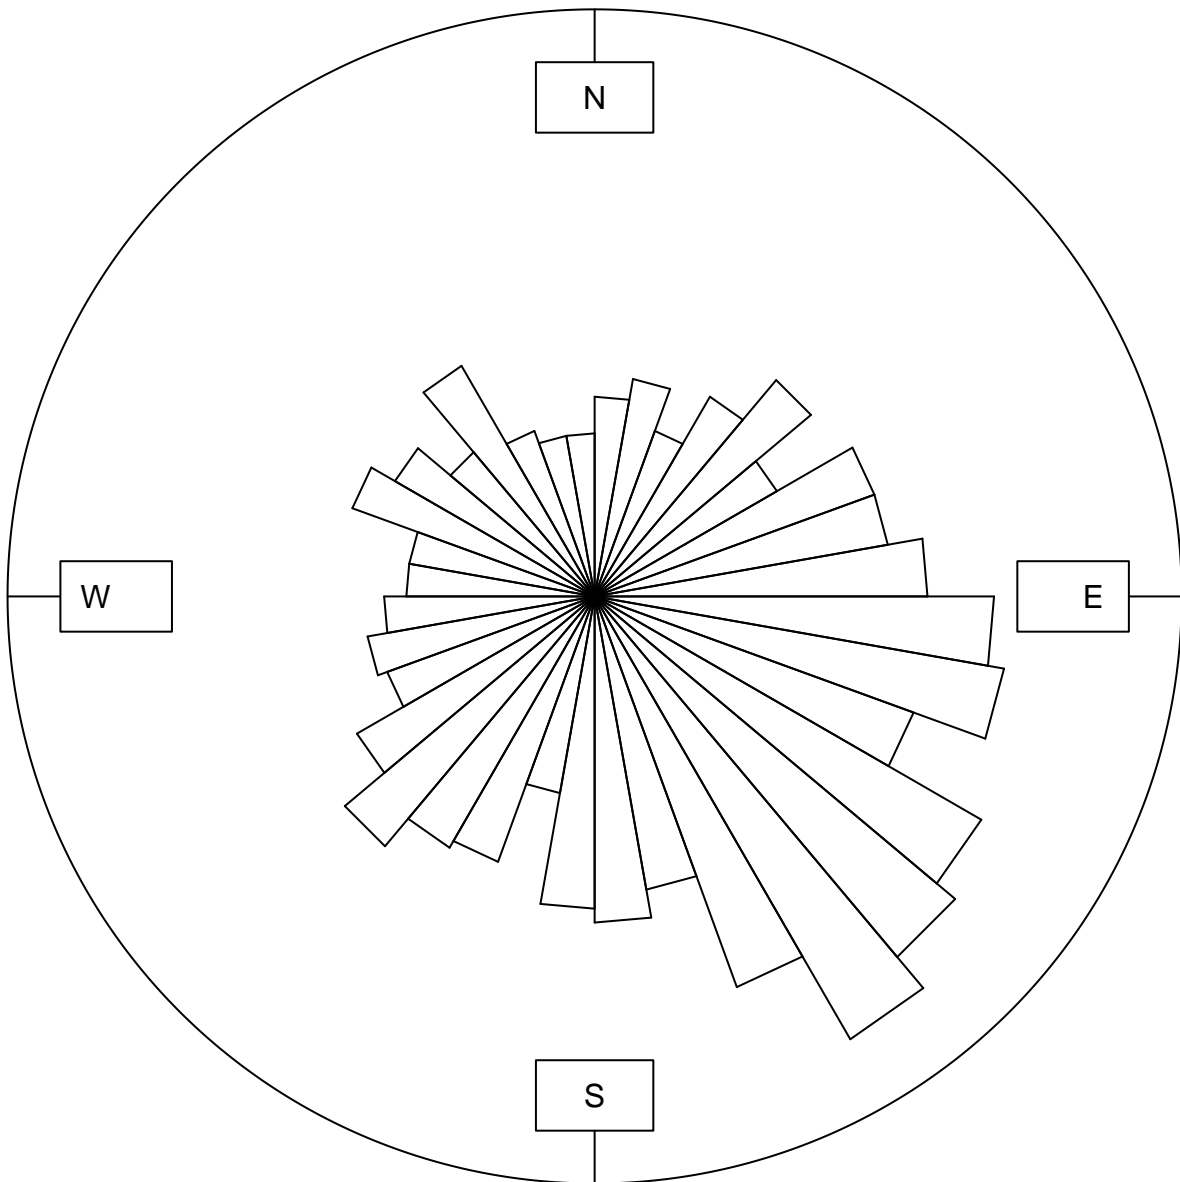

# bootstrap 450

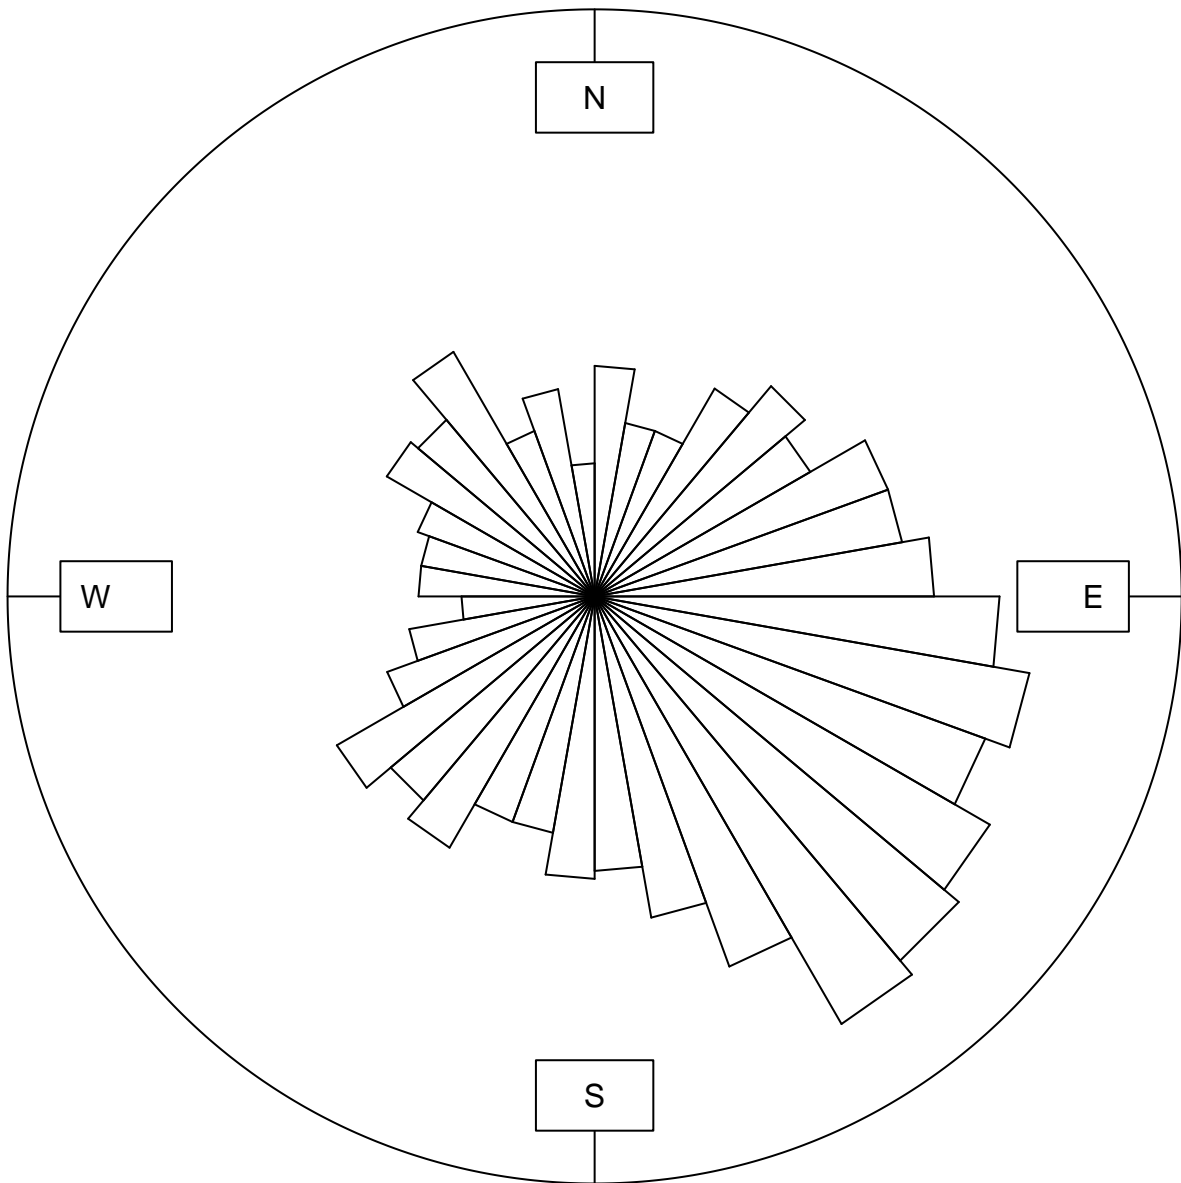

# bootstrap 451

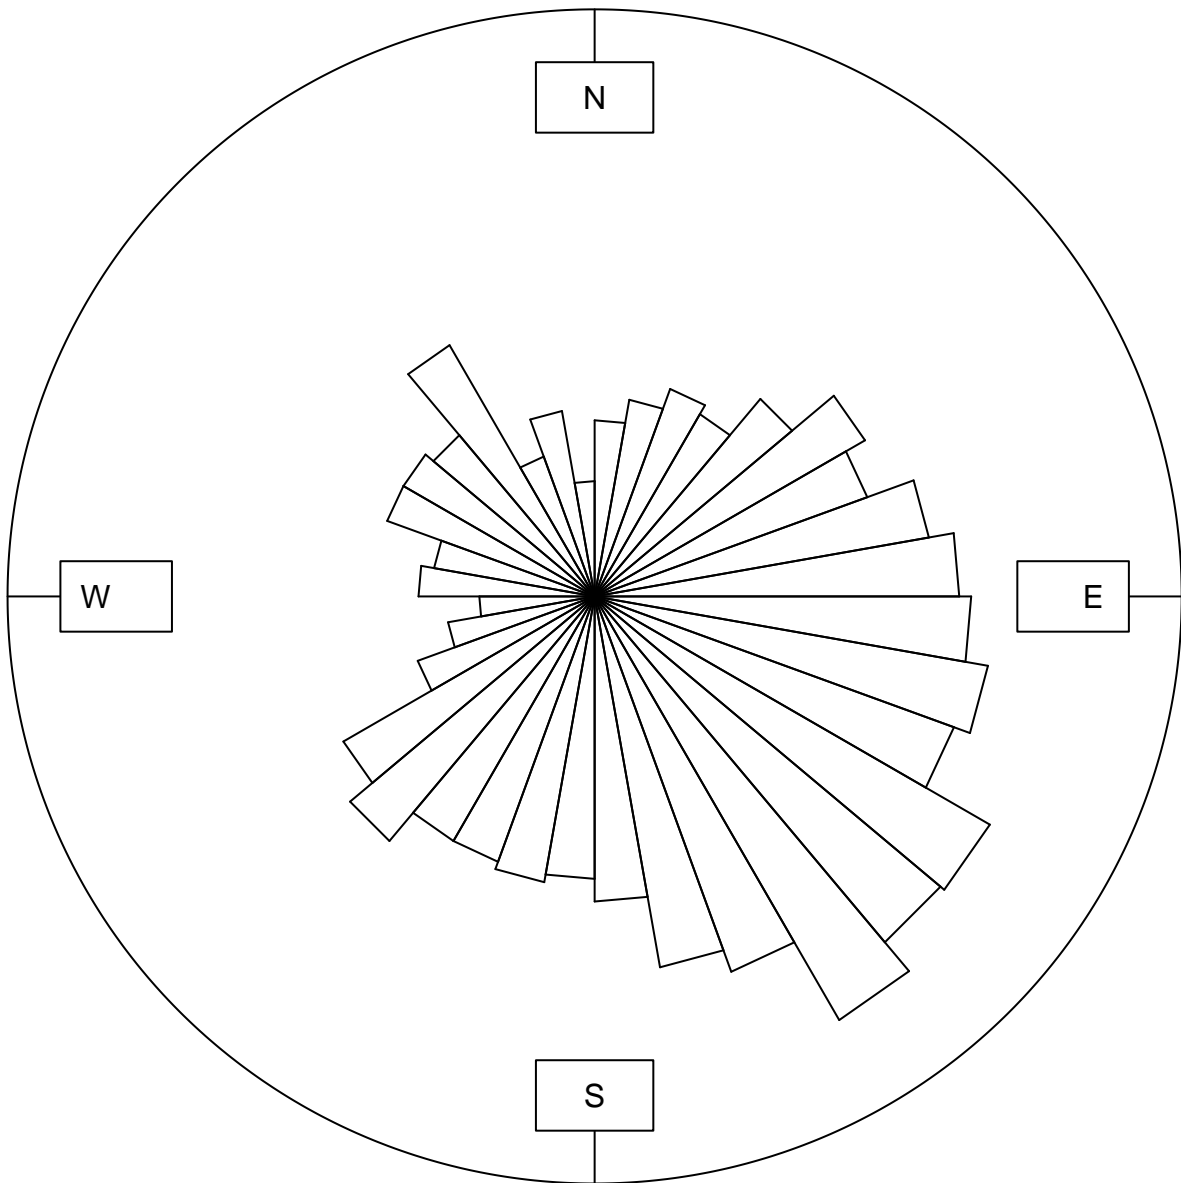

# bootstrap 452

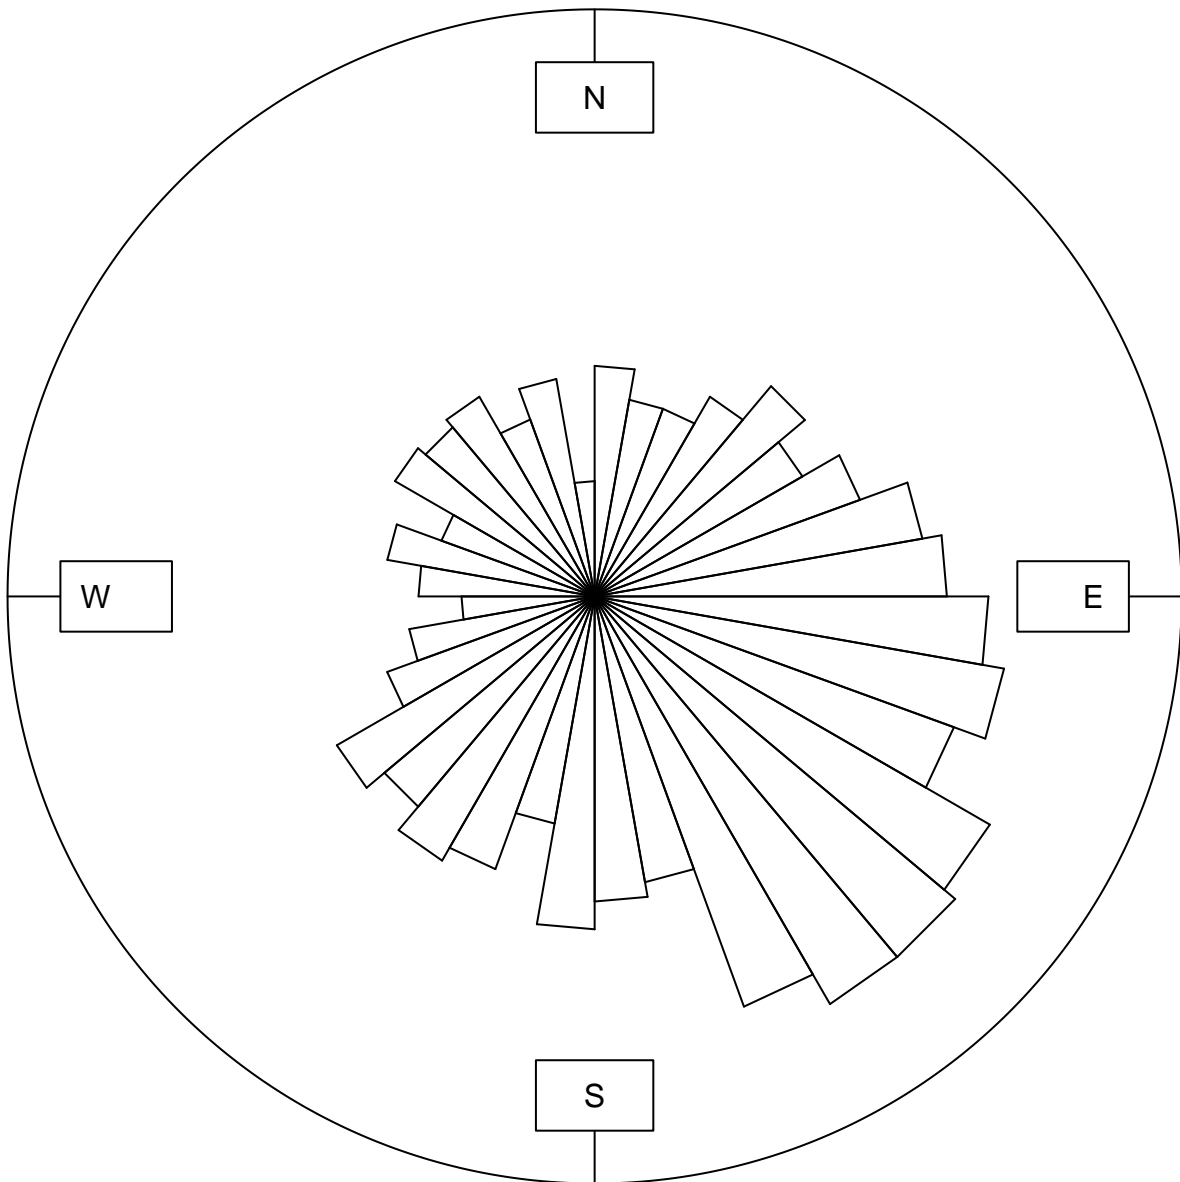

# bootstrap 453

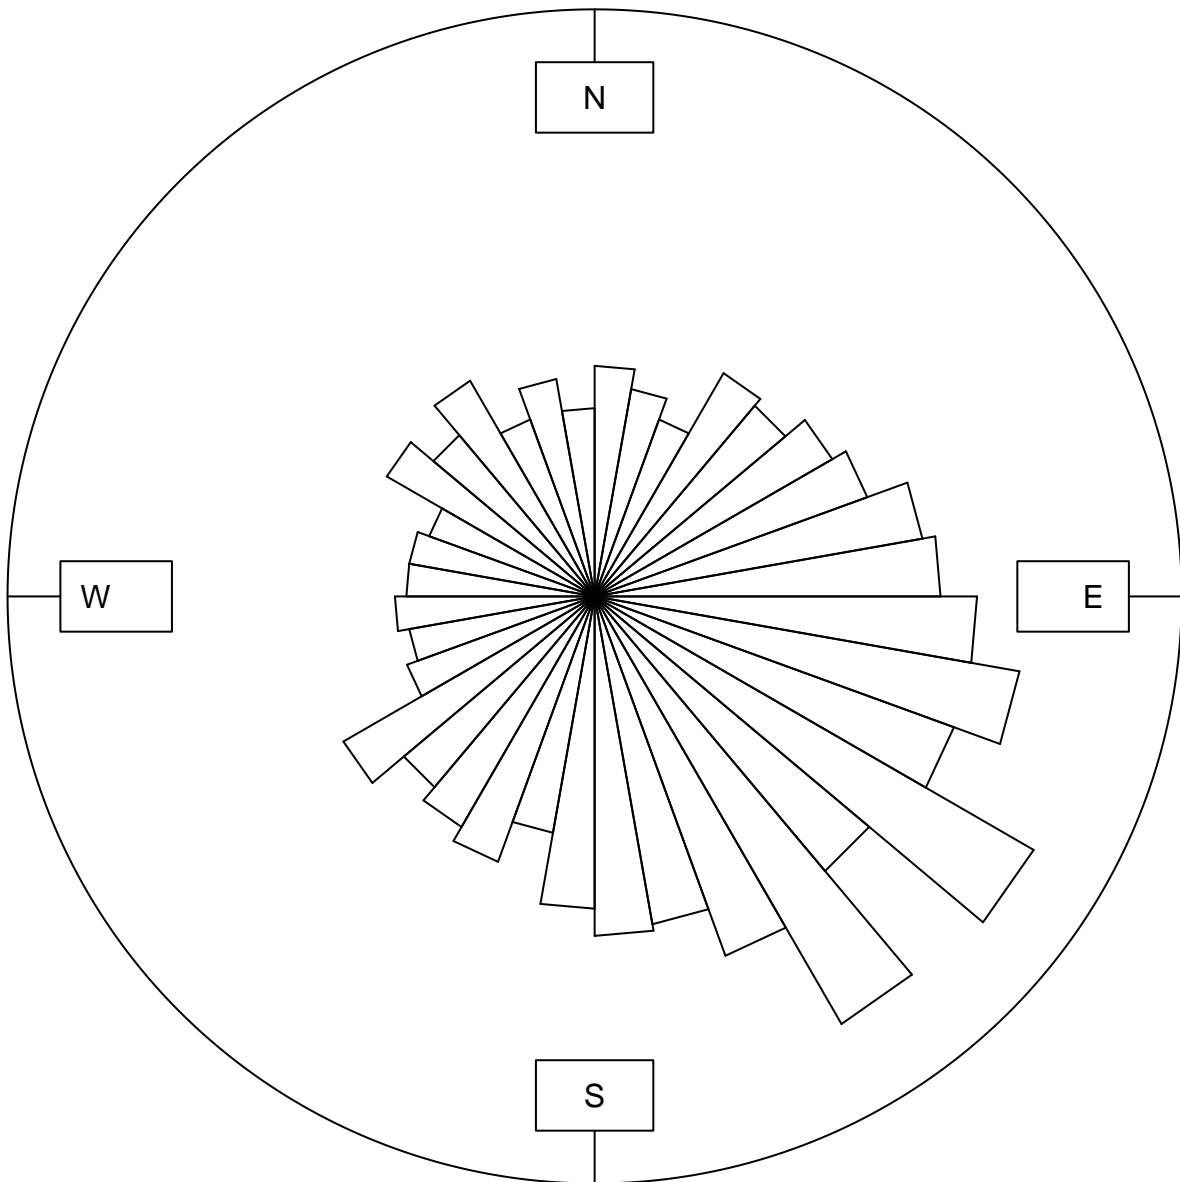

# bootstrap 454

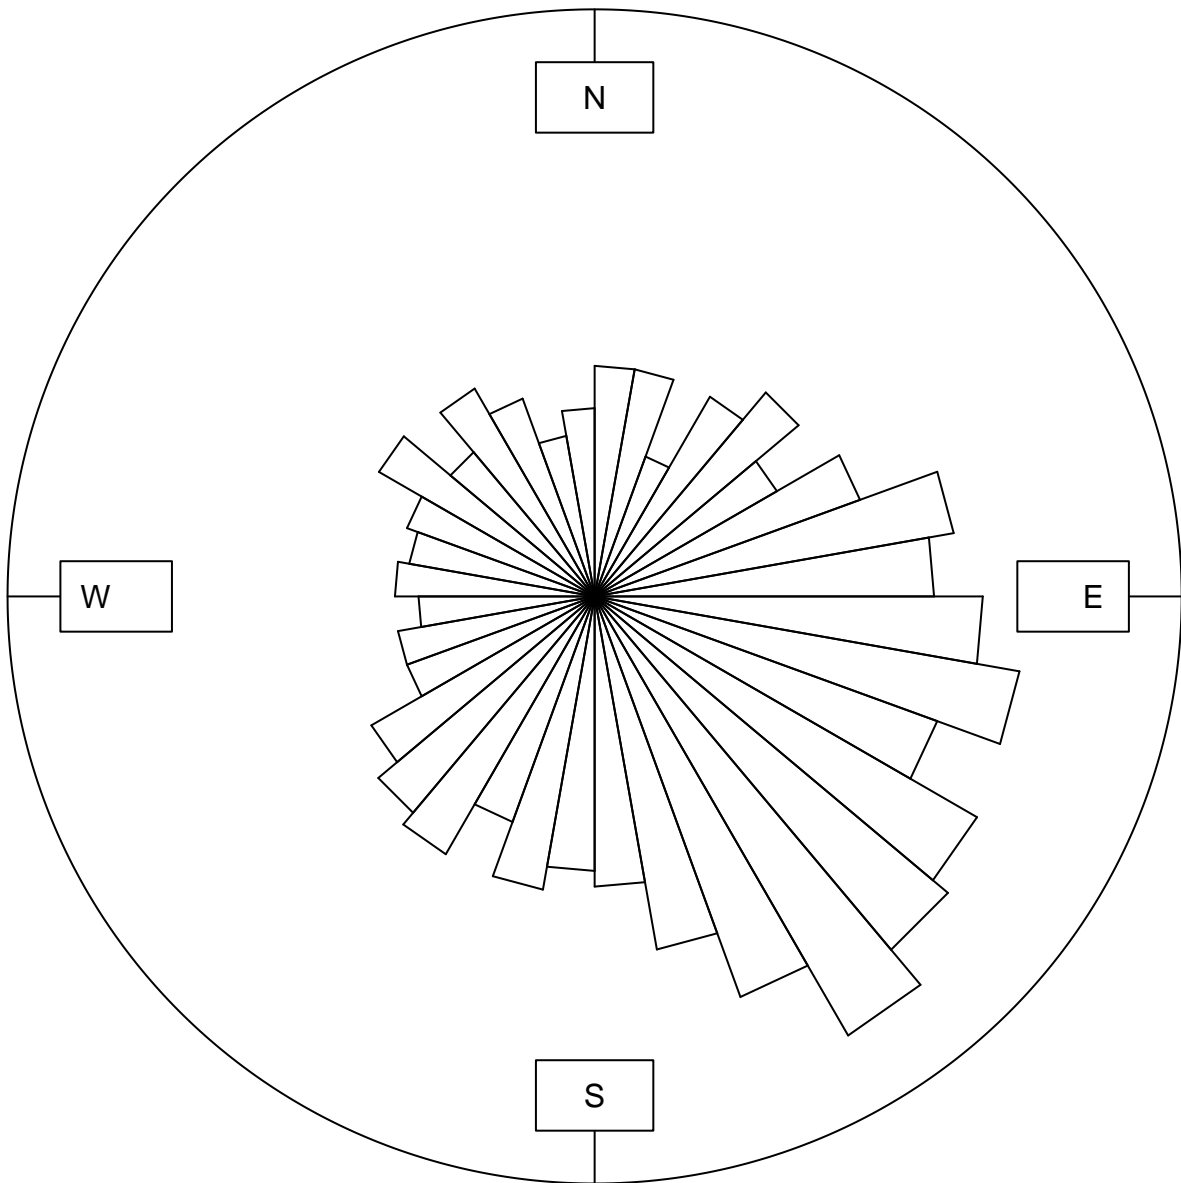

# bootstrap 455

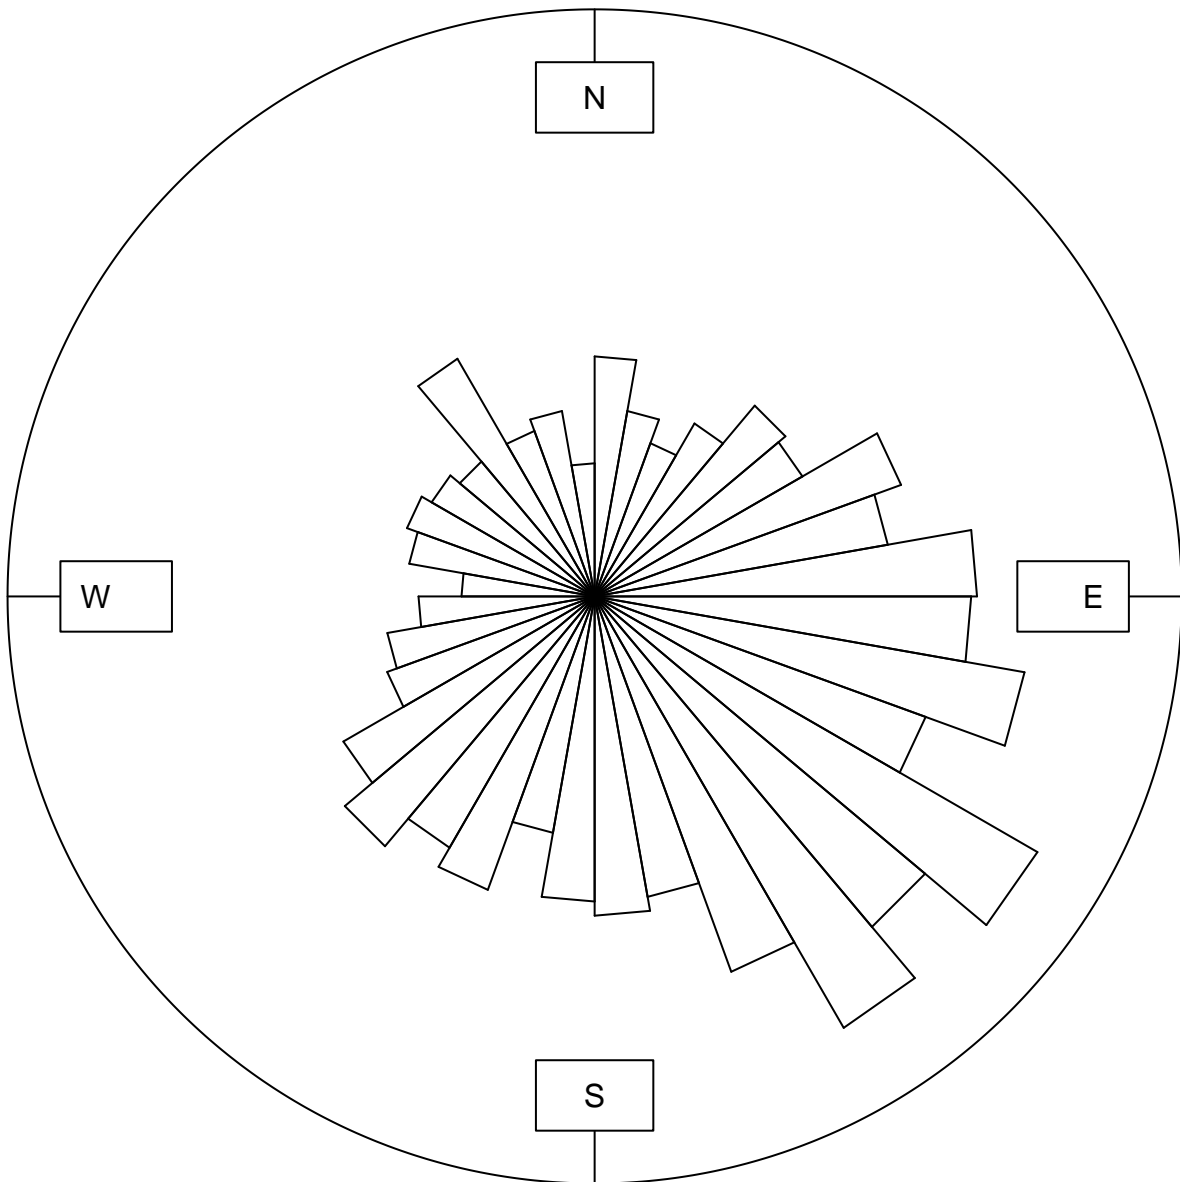

# bootstrap 456

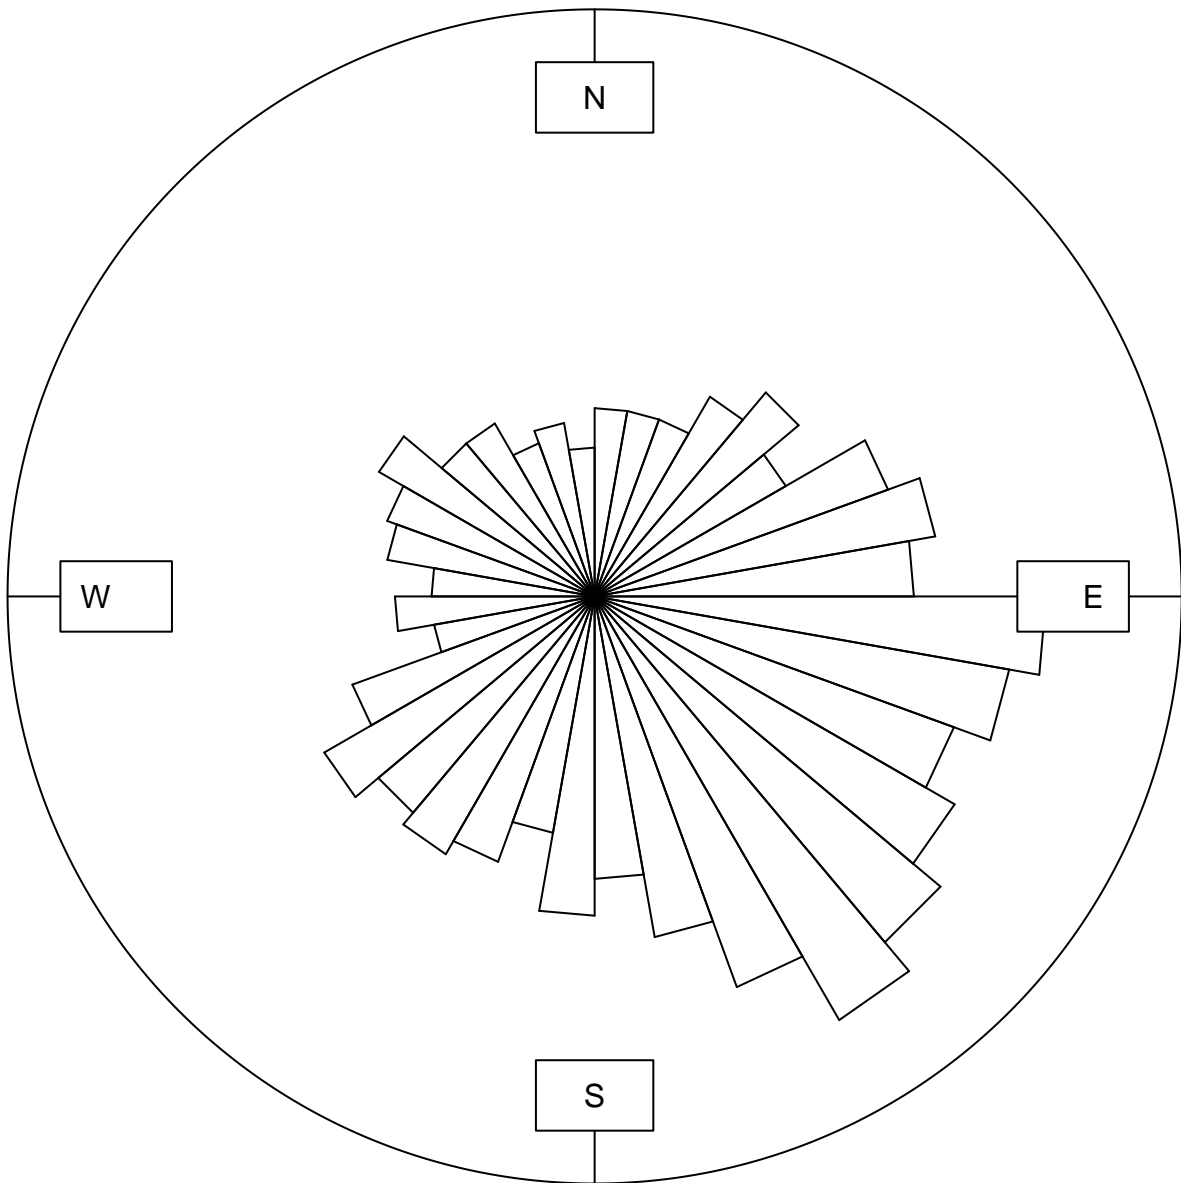



# bootstrap 457

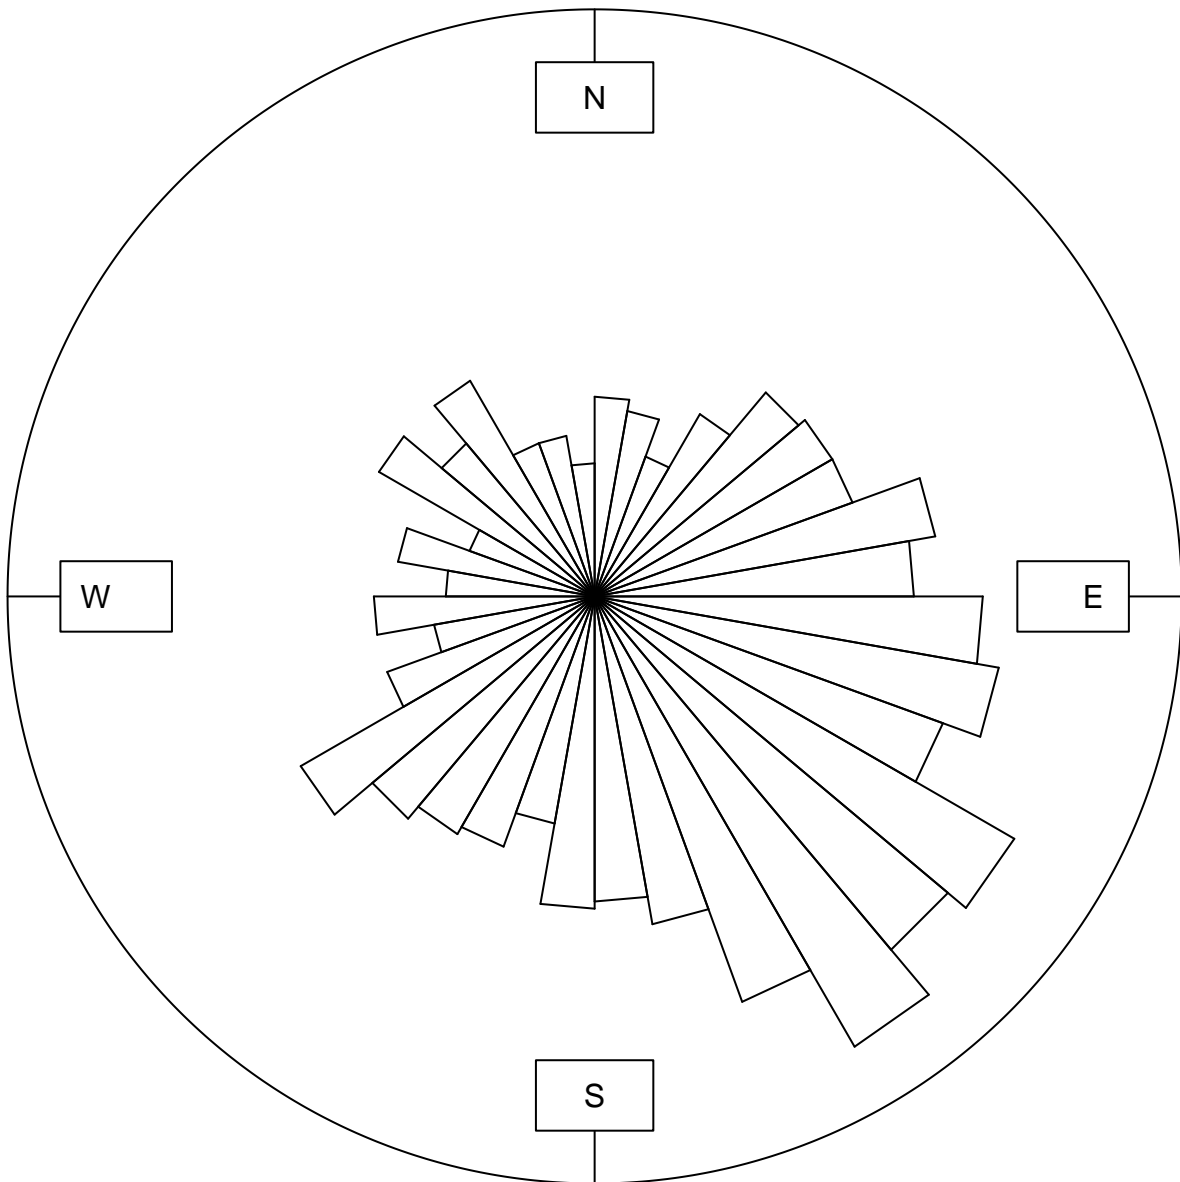

# bootstrap 458

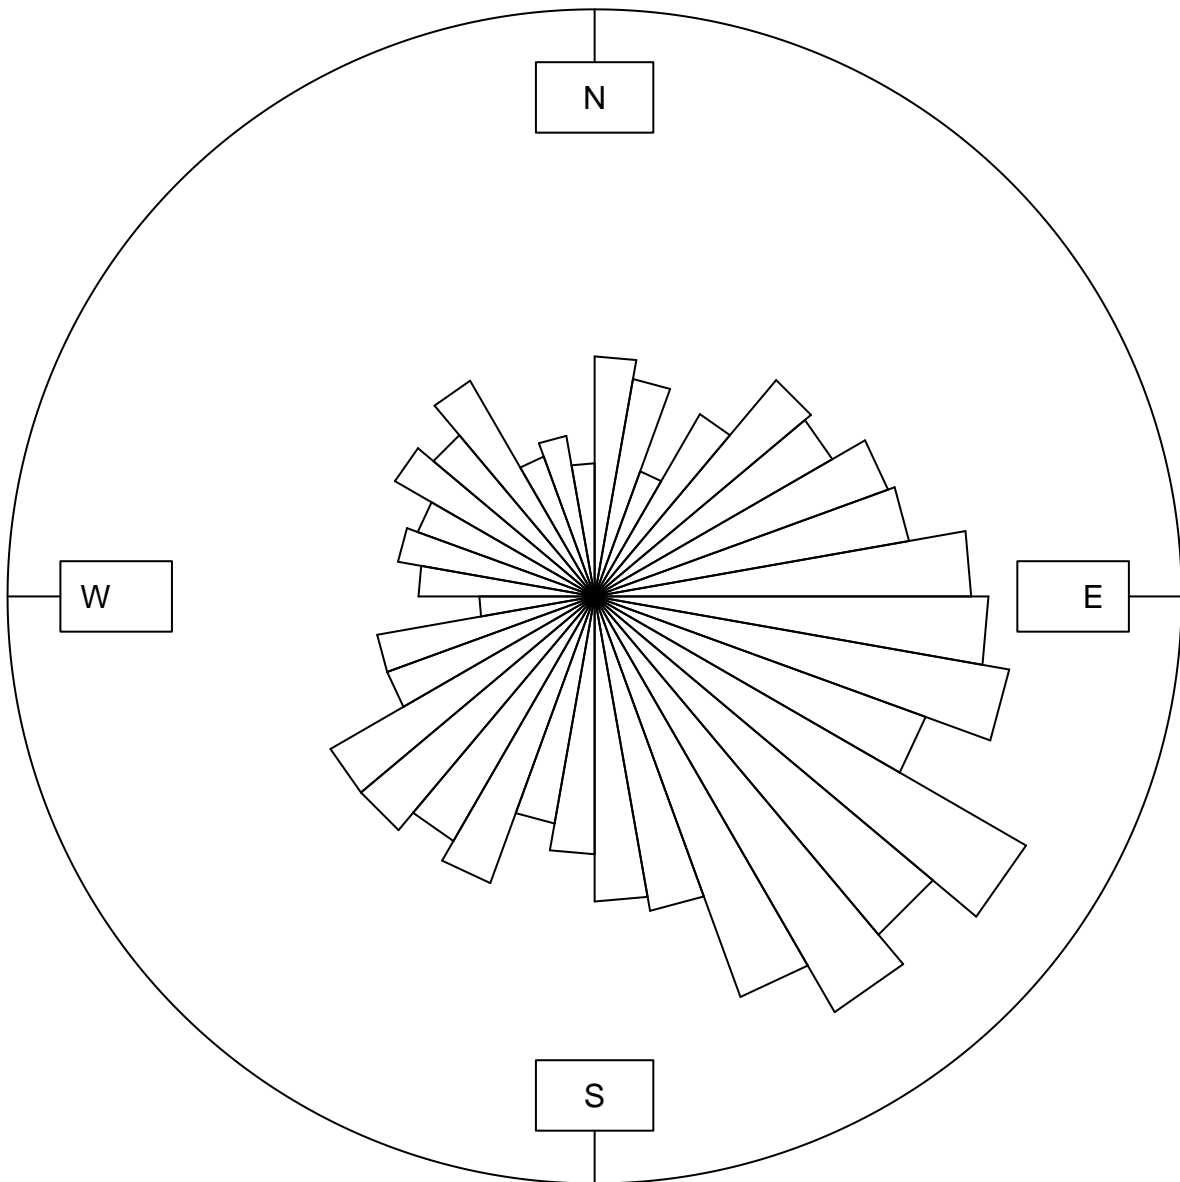

# bootstrap 459

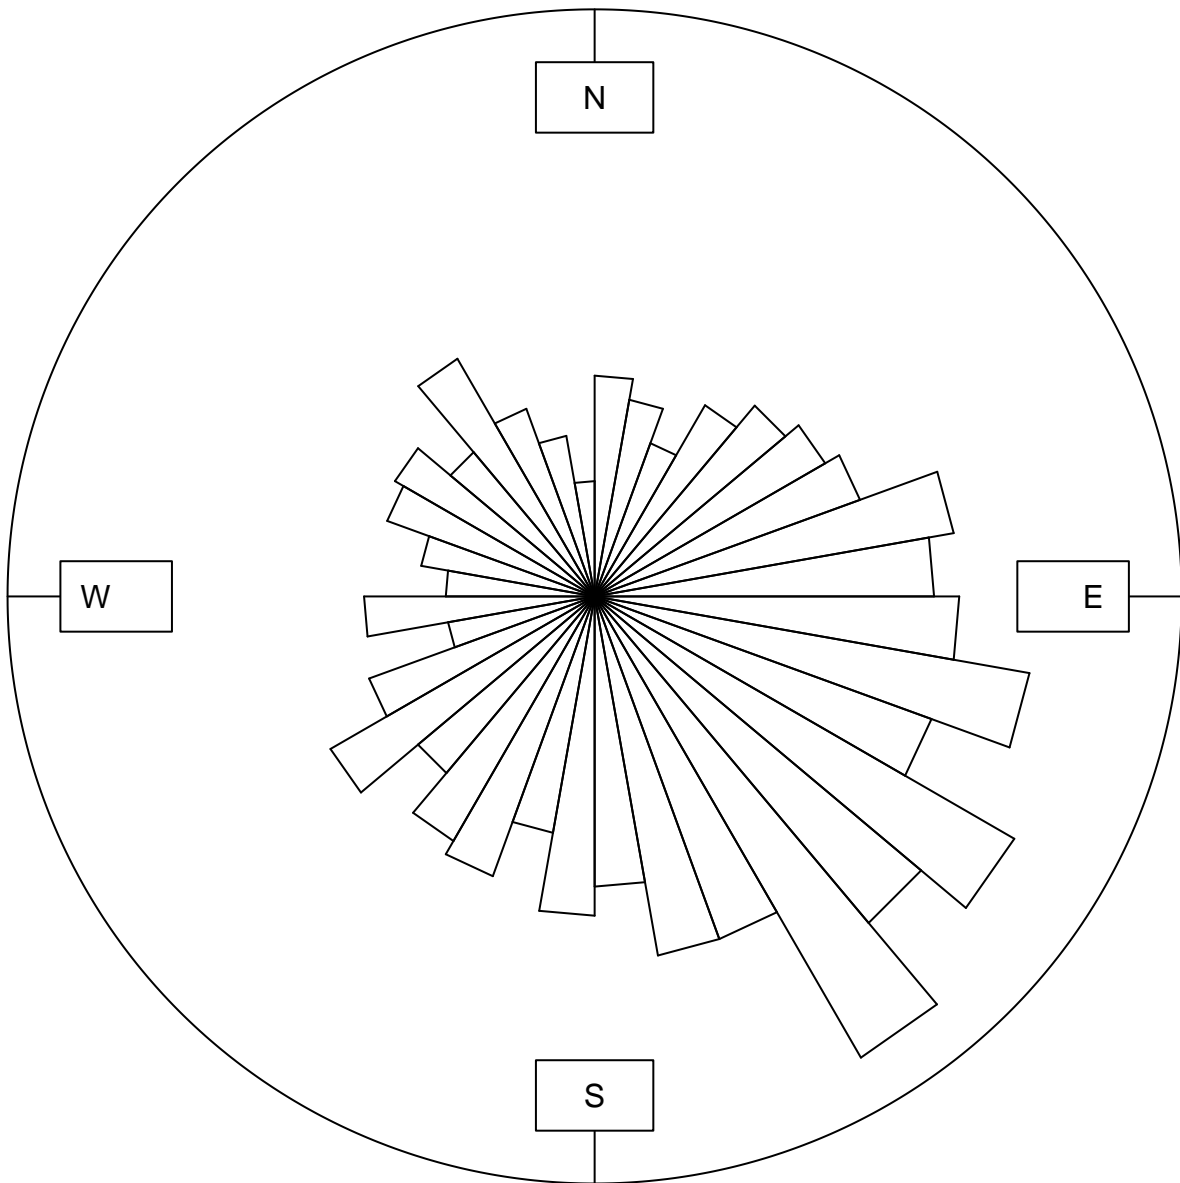

# bootstrap 460

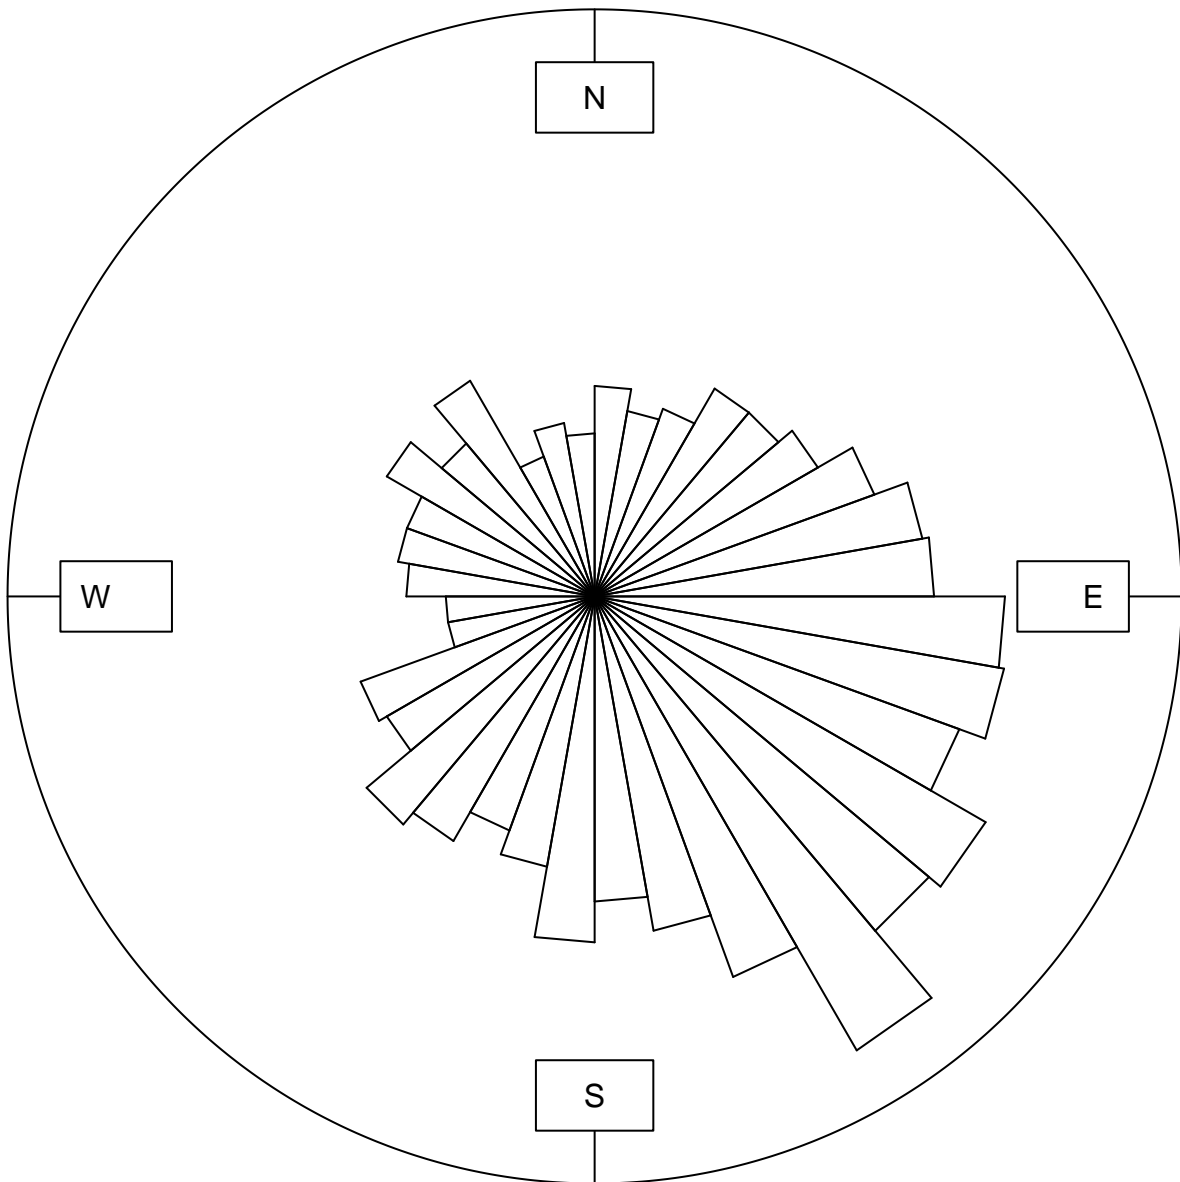

# bootstrap 461

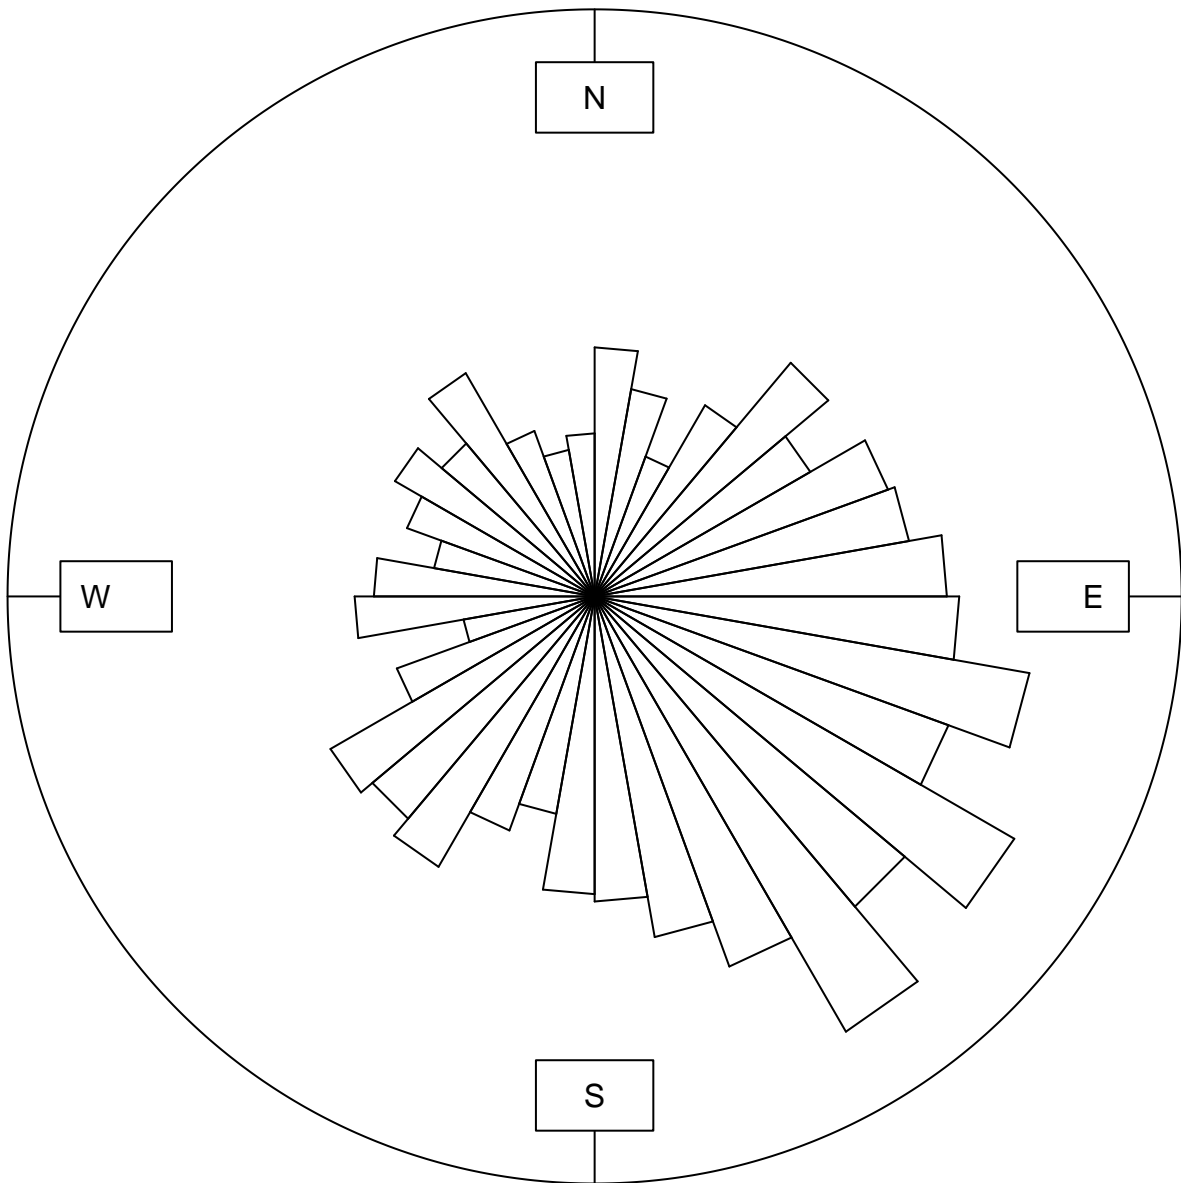

# bootstrap 462

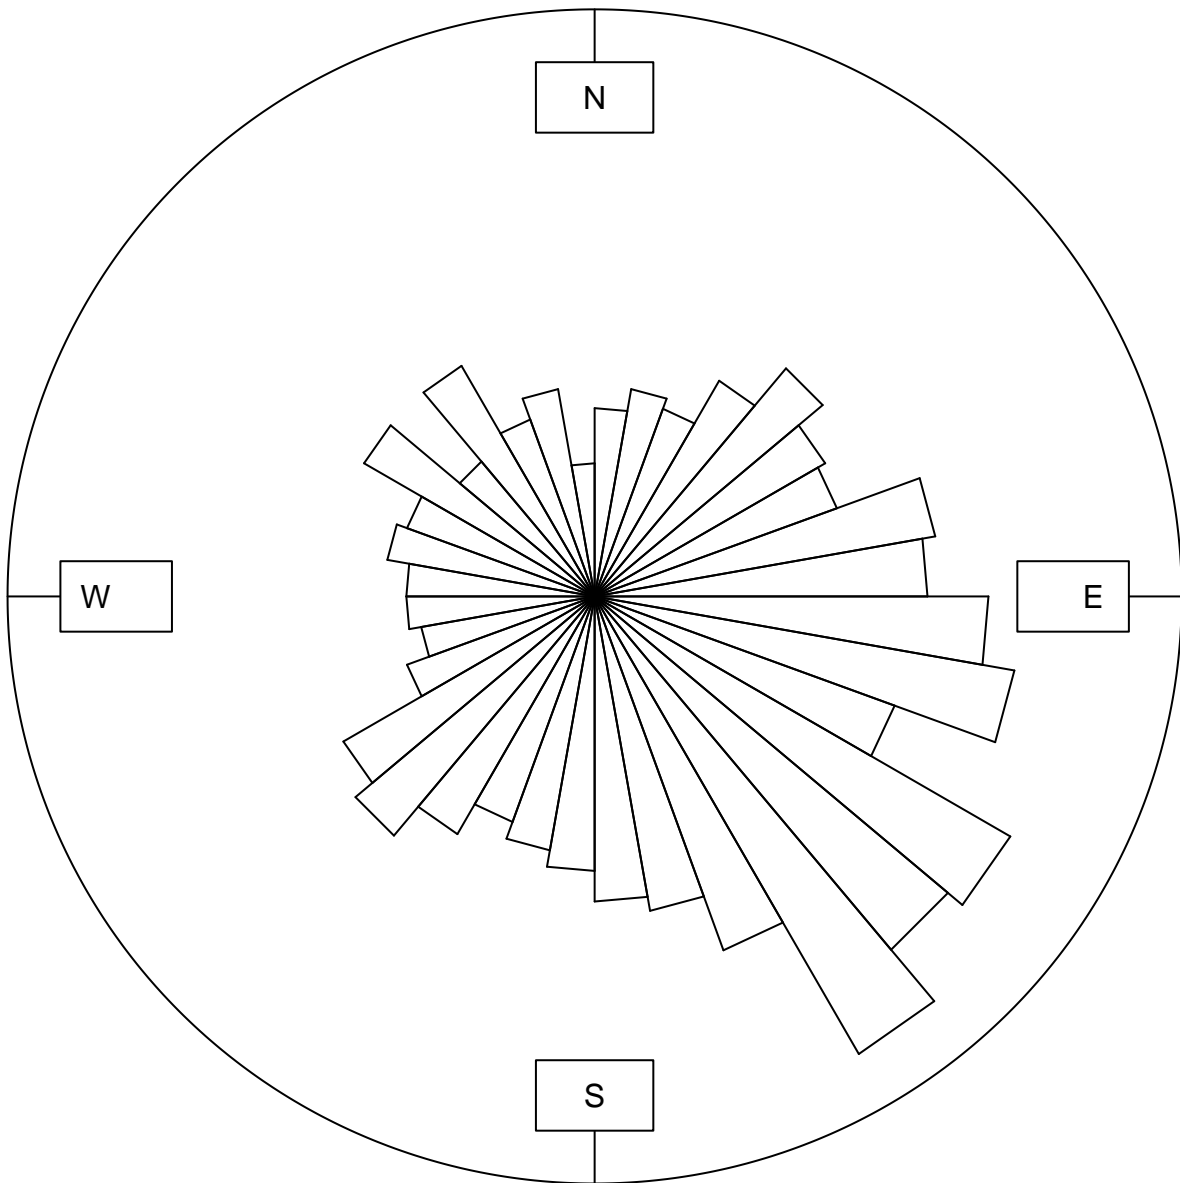

# bootstrap 463

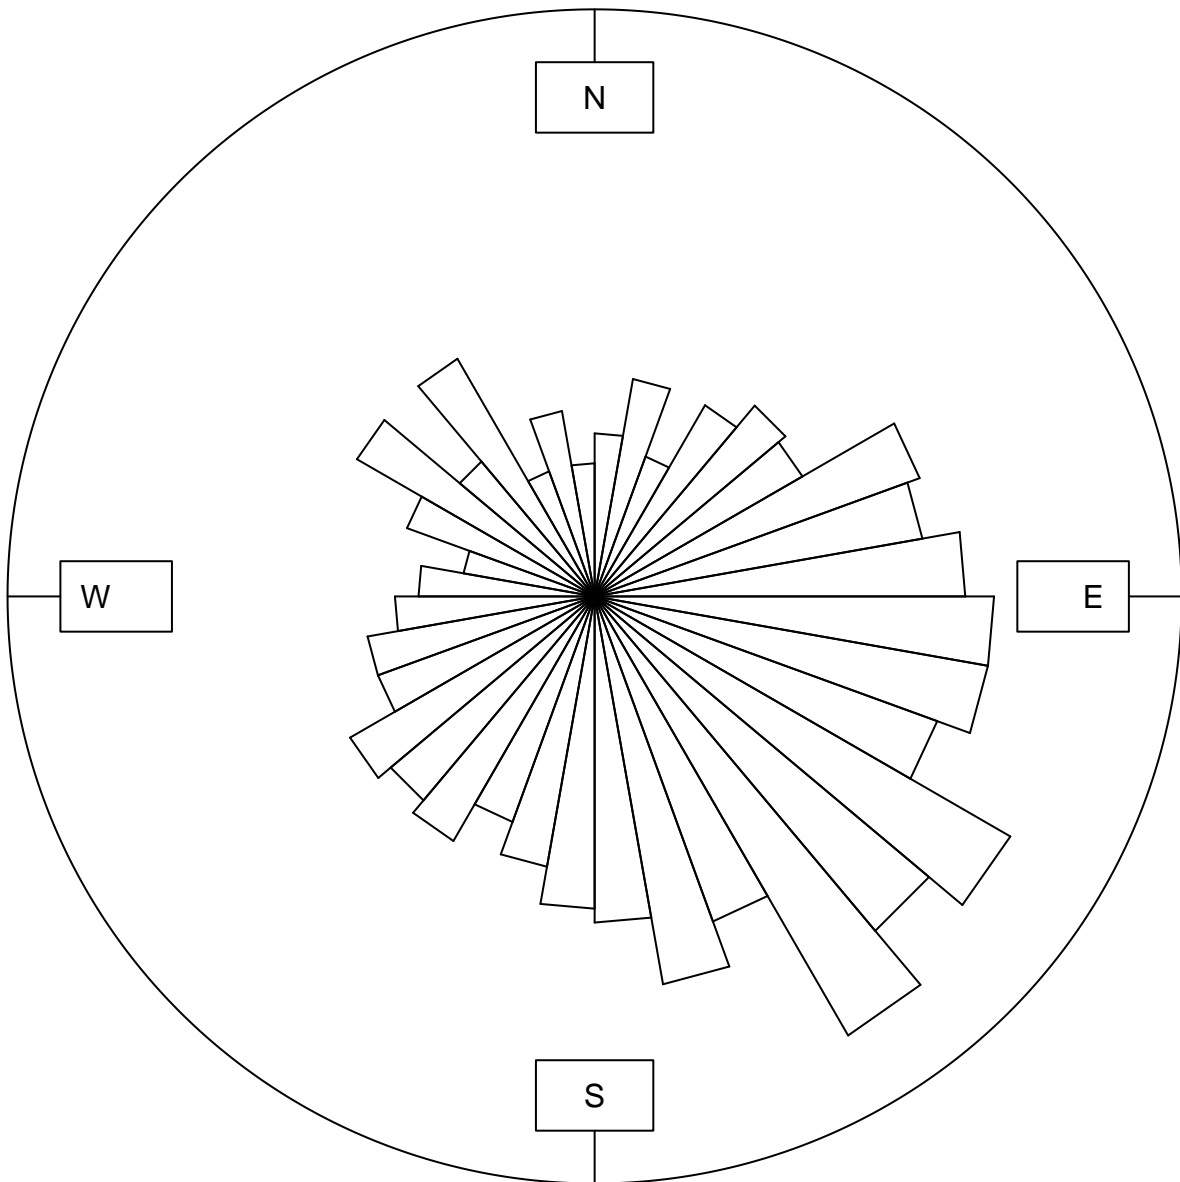

# bootstrap 464

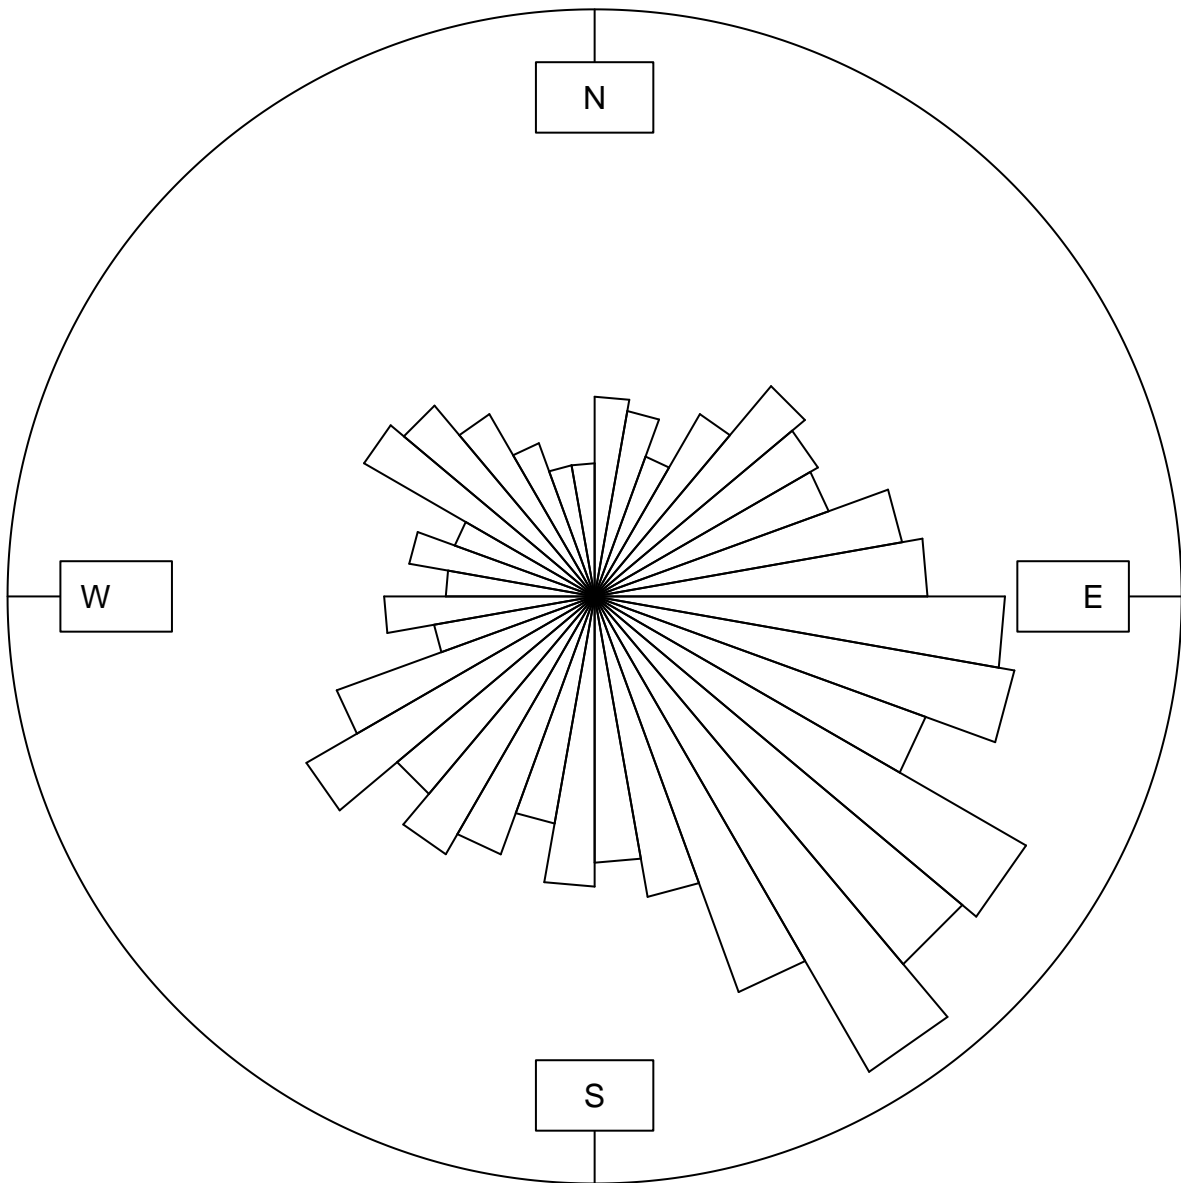



# bootstrap 465

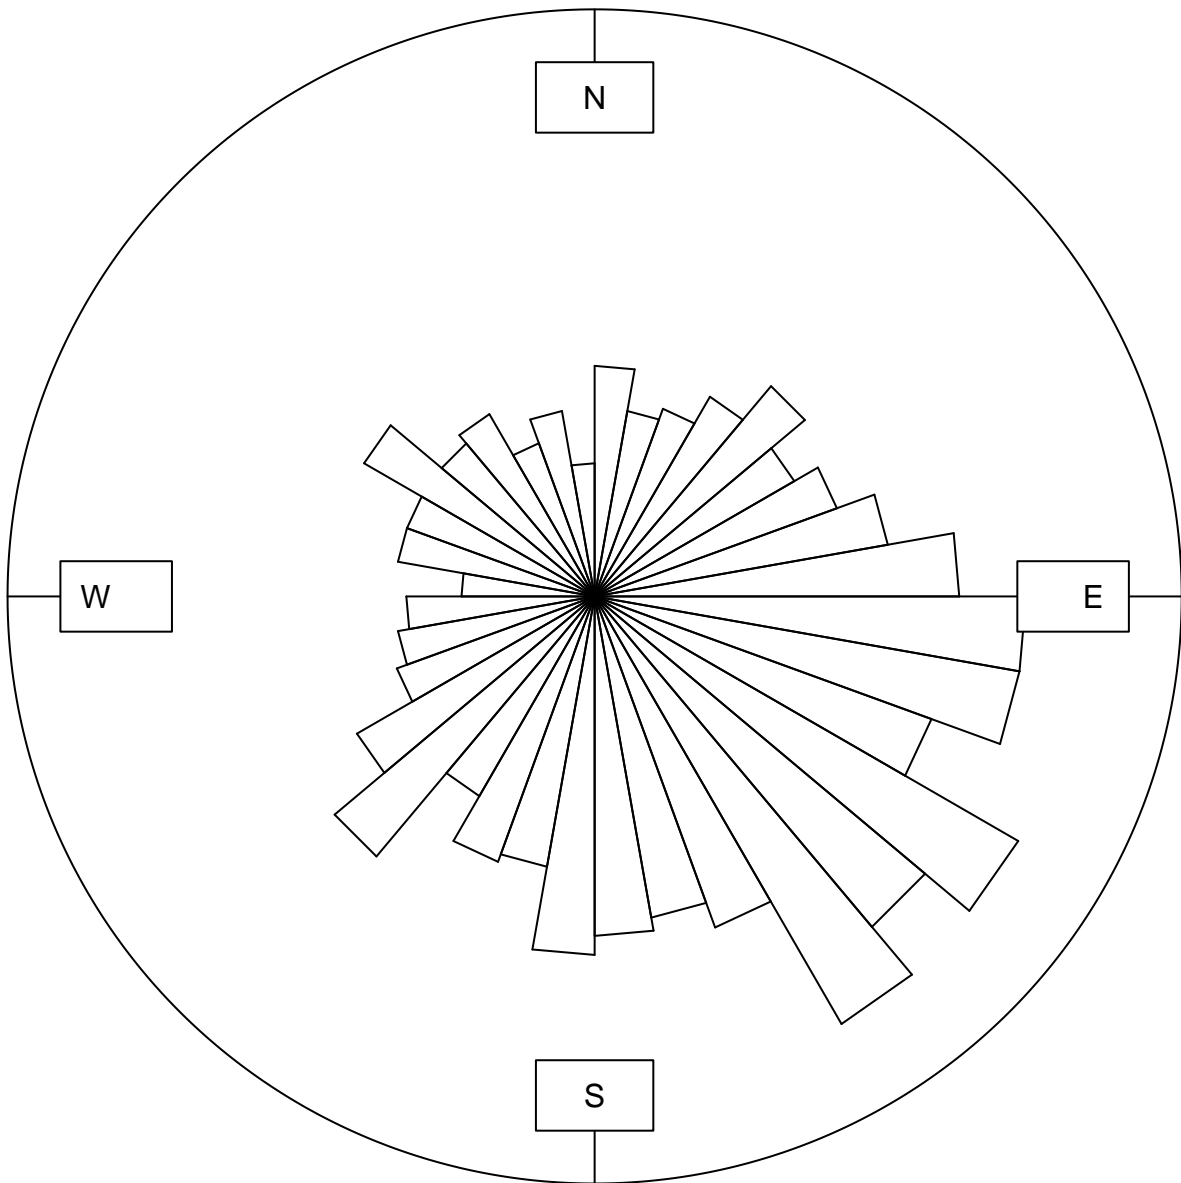

# bootstrap 466

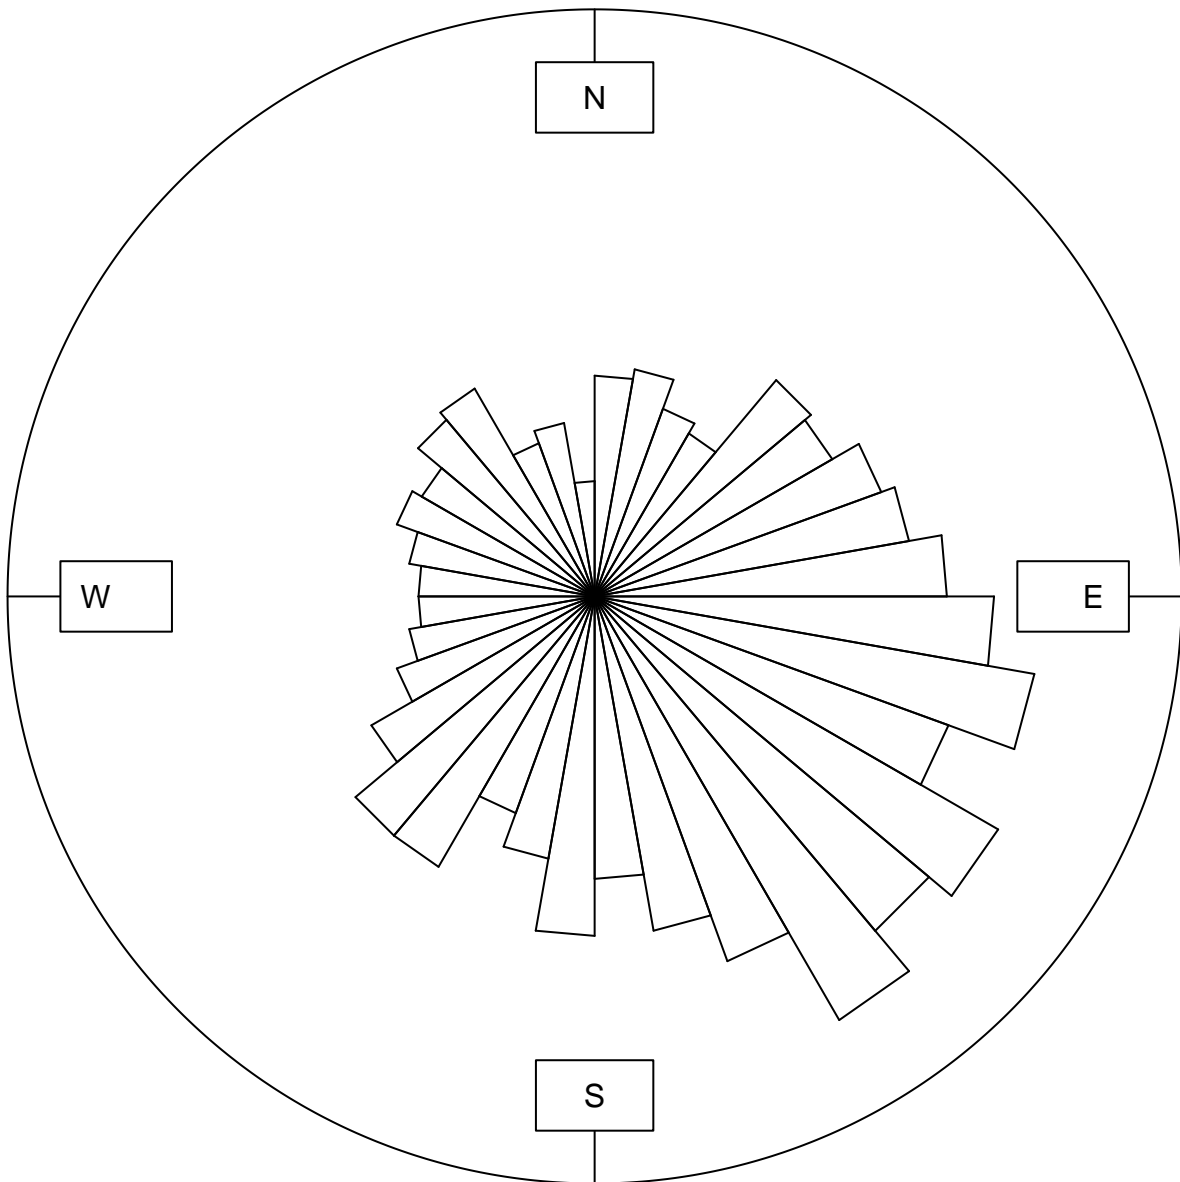

# bootstrap 467

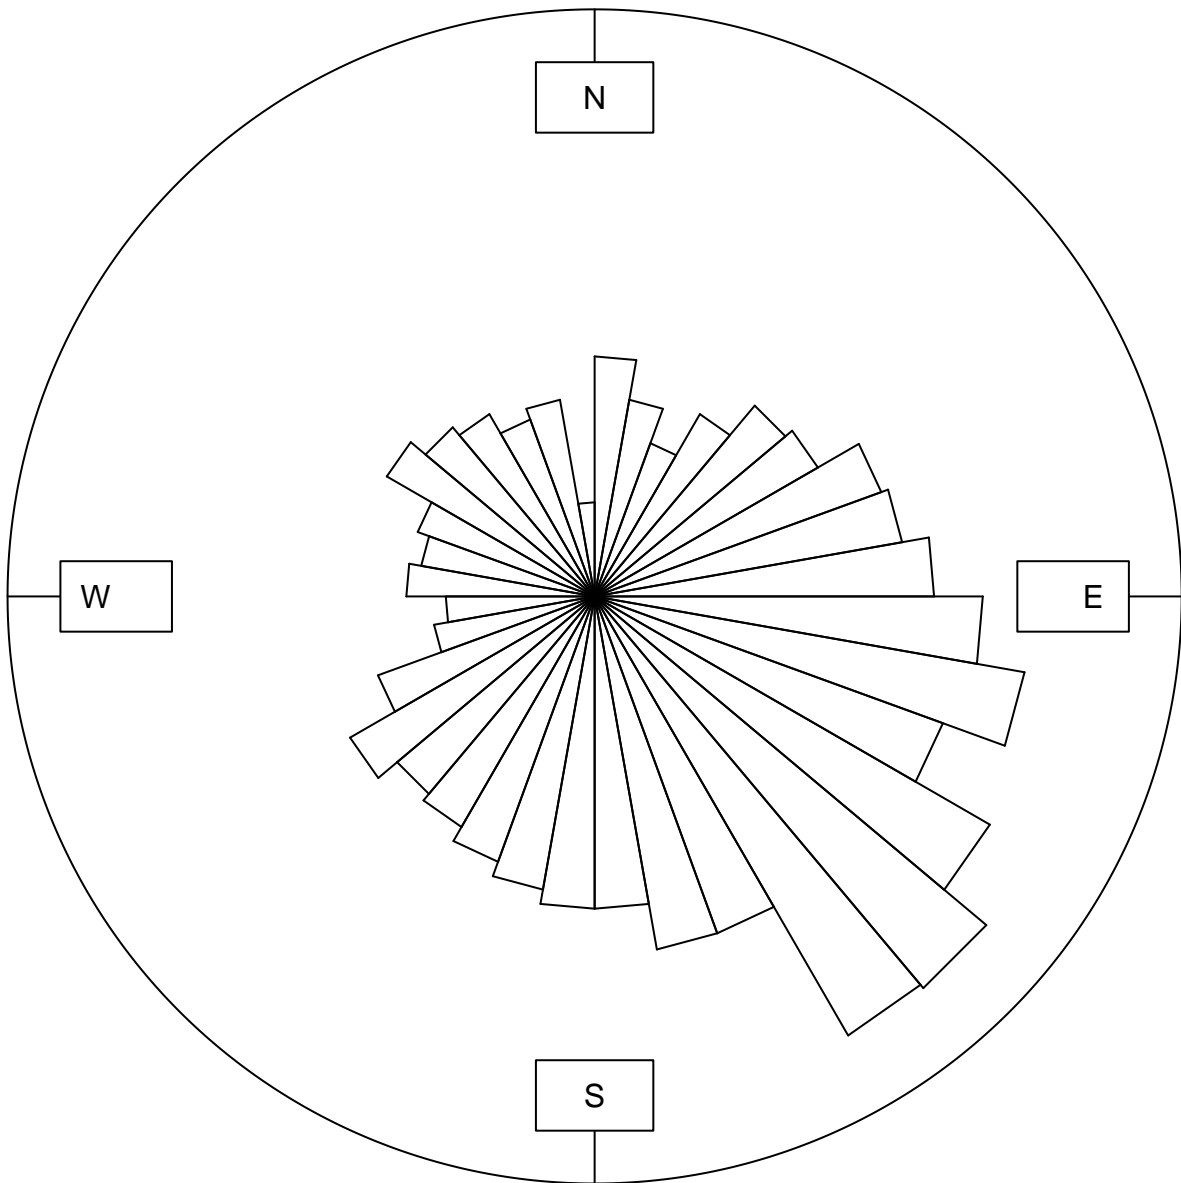

# bootstrap 468

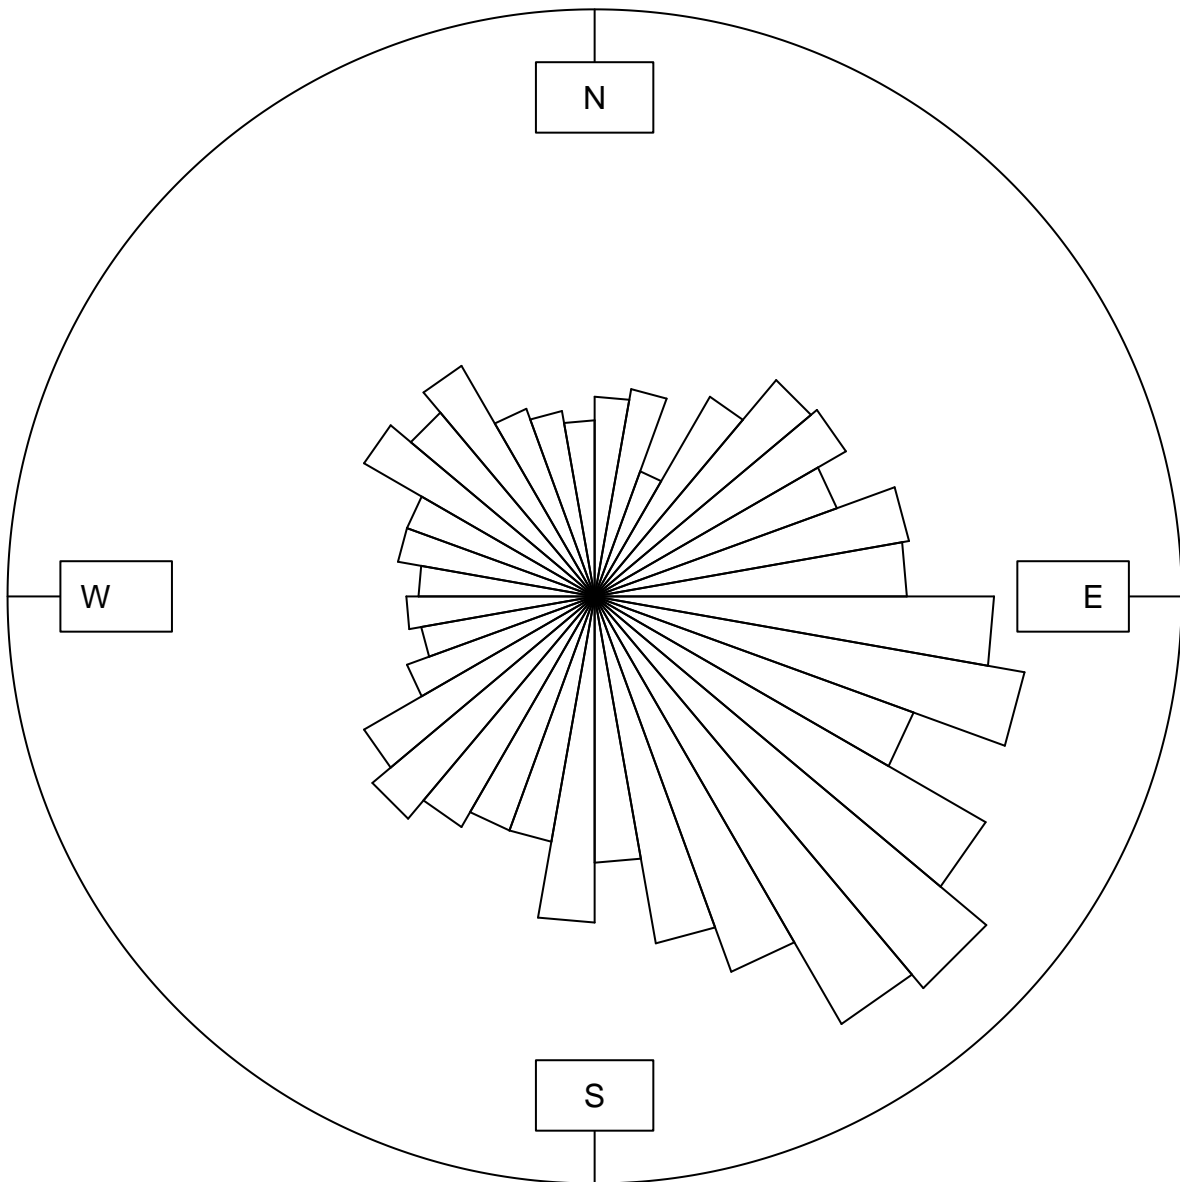

# bootstrap 469

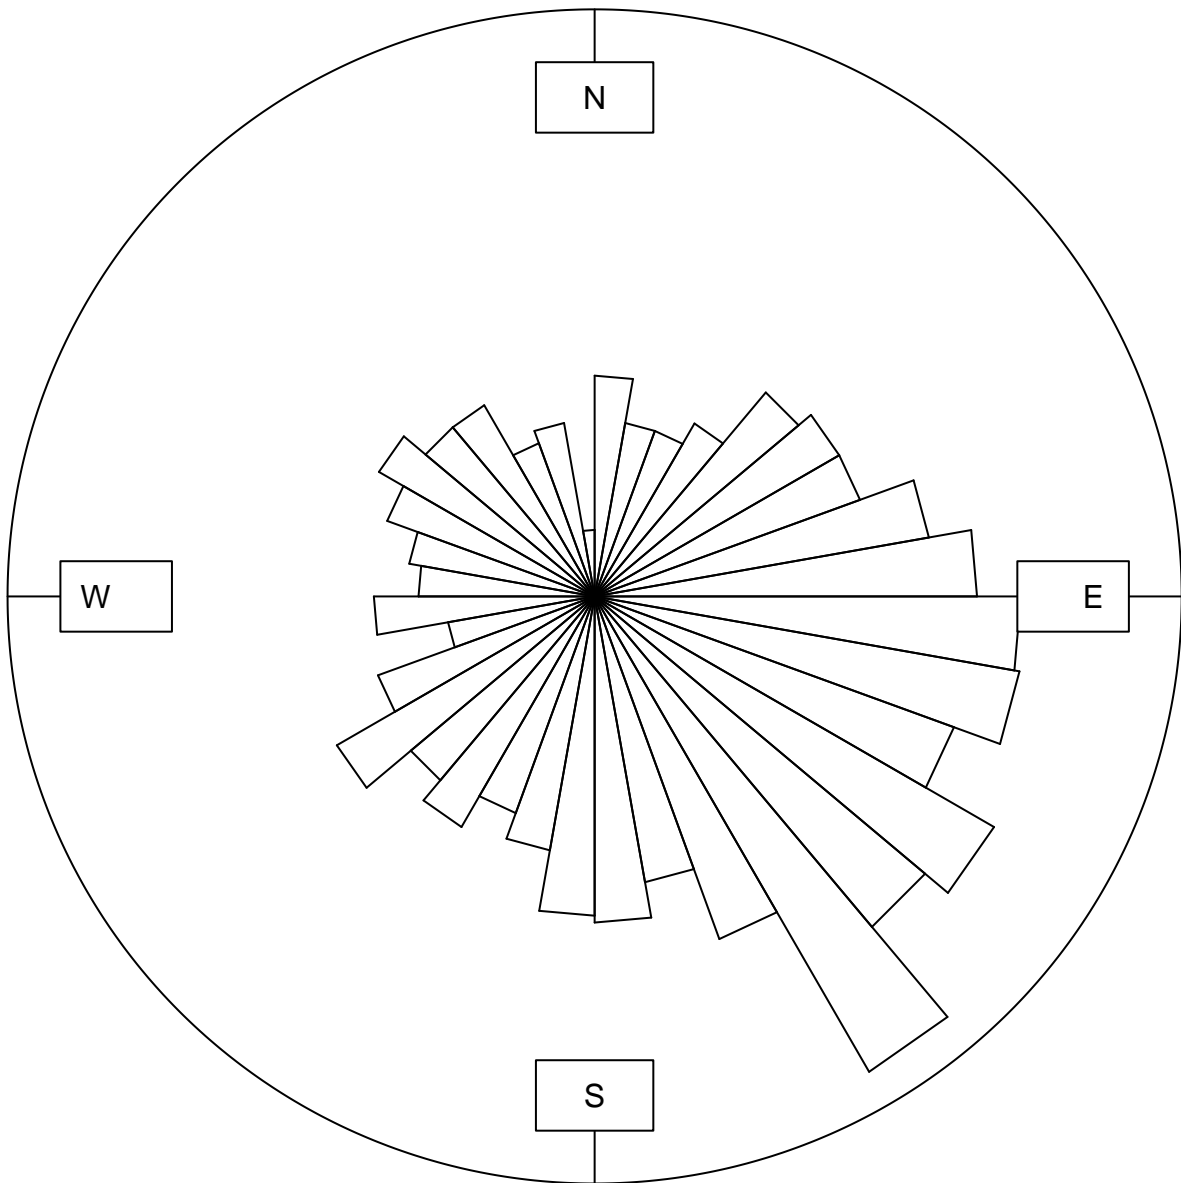

# bootstrap 470

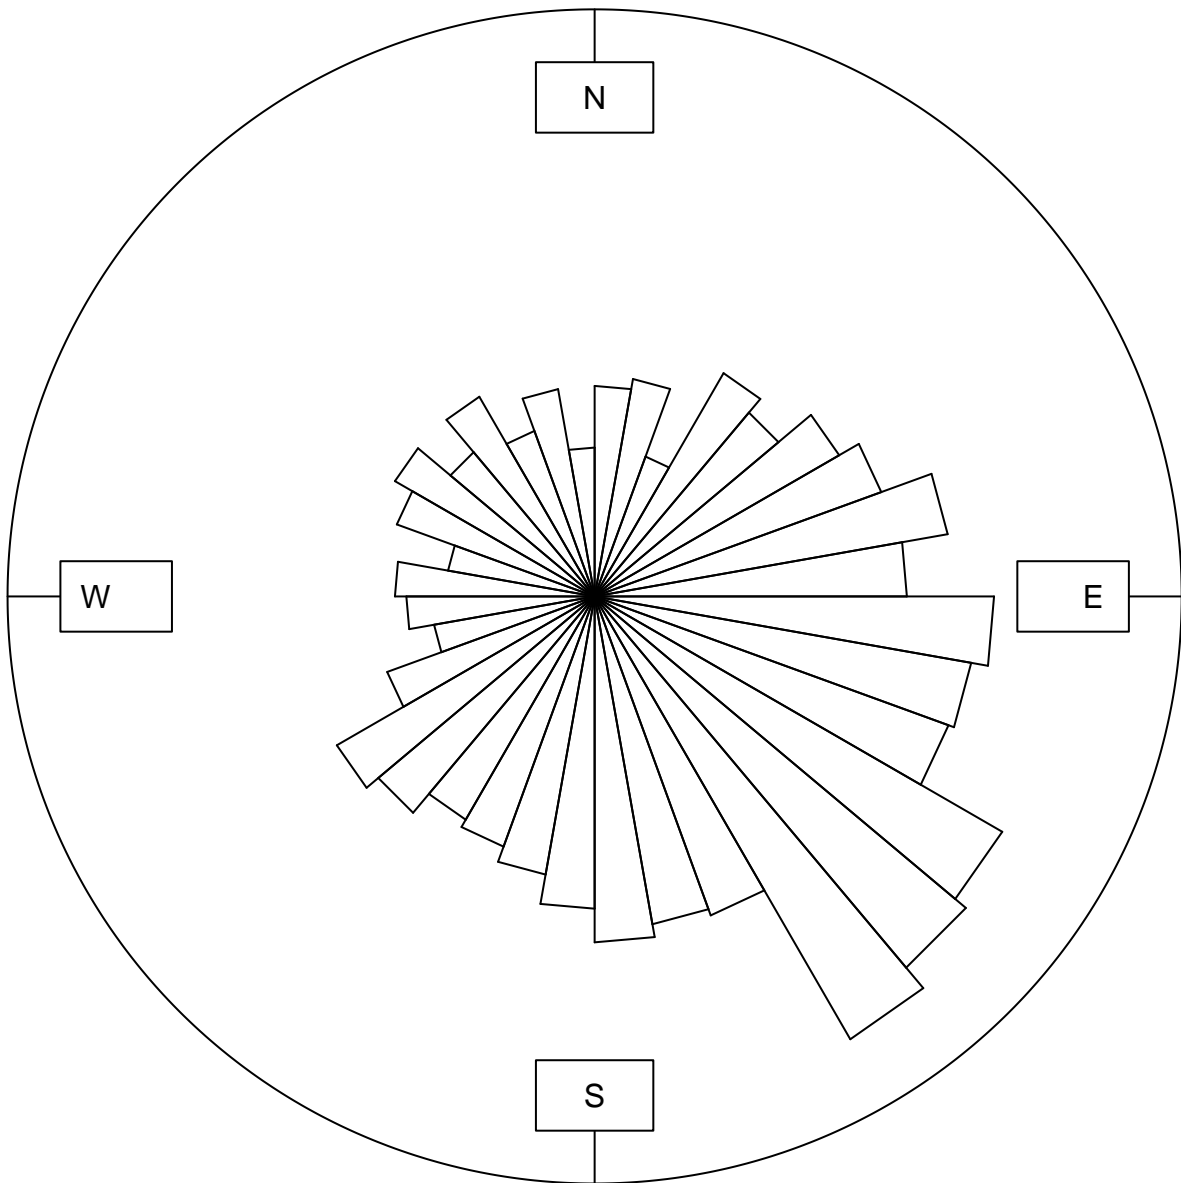

**bootstrap 471**

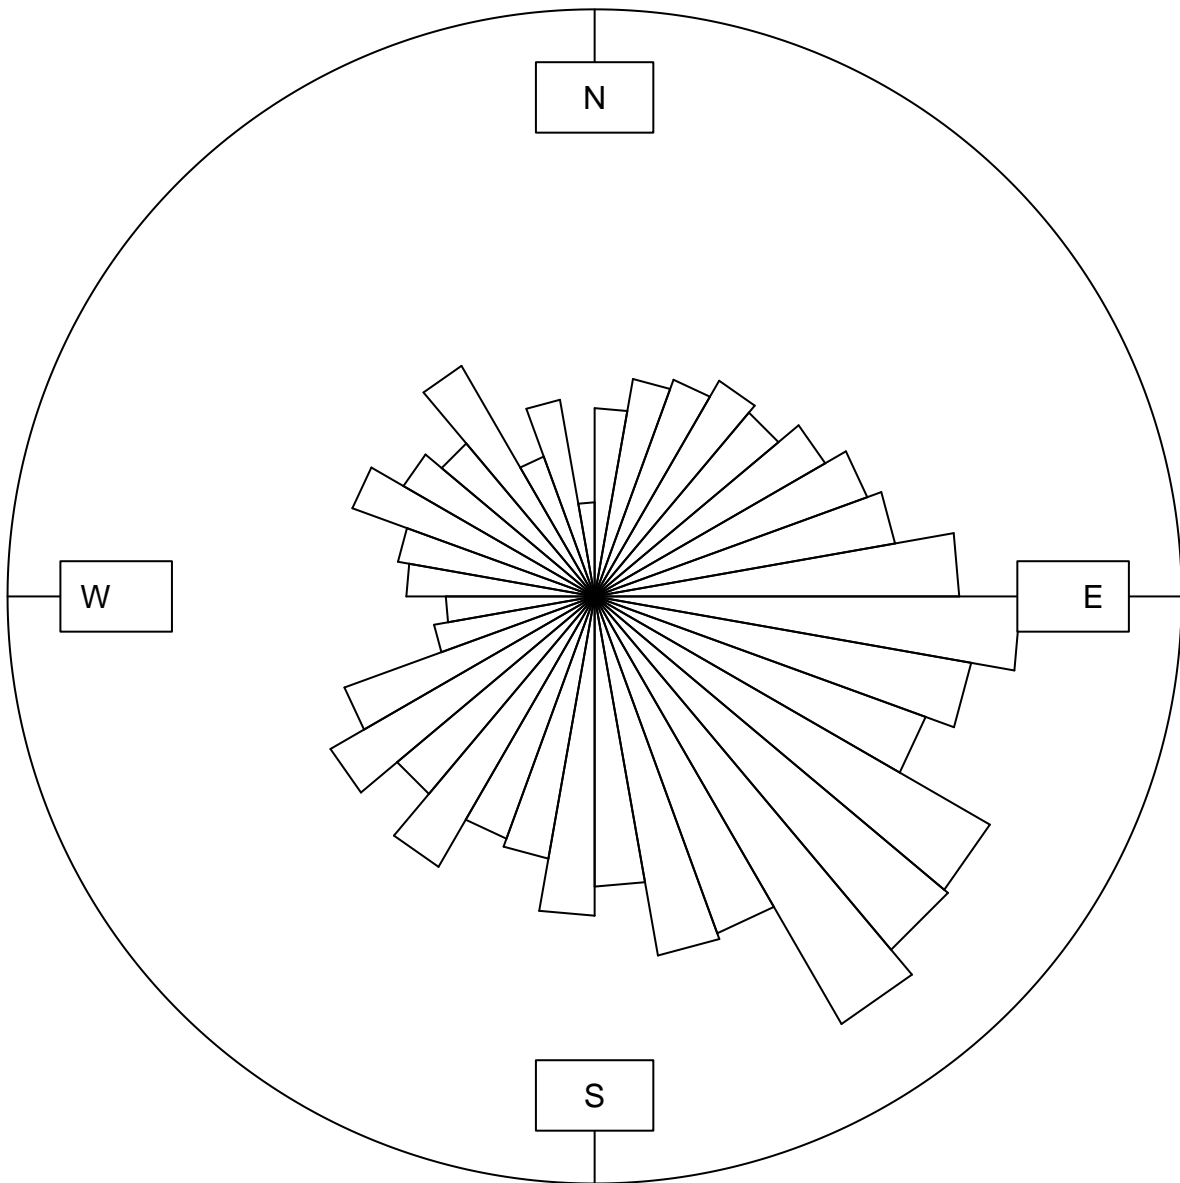

# bootstrap 472

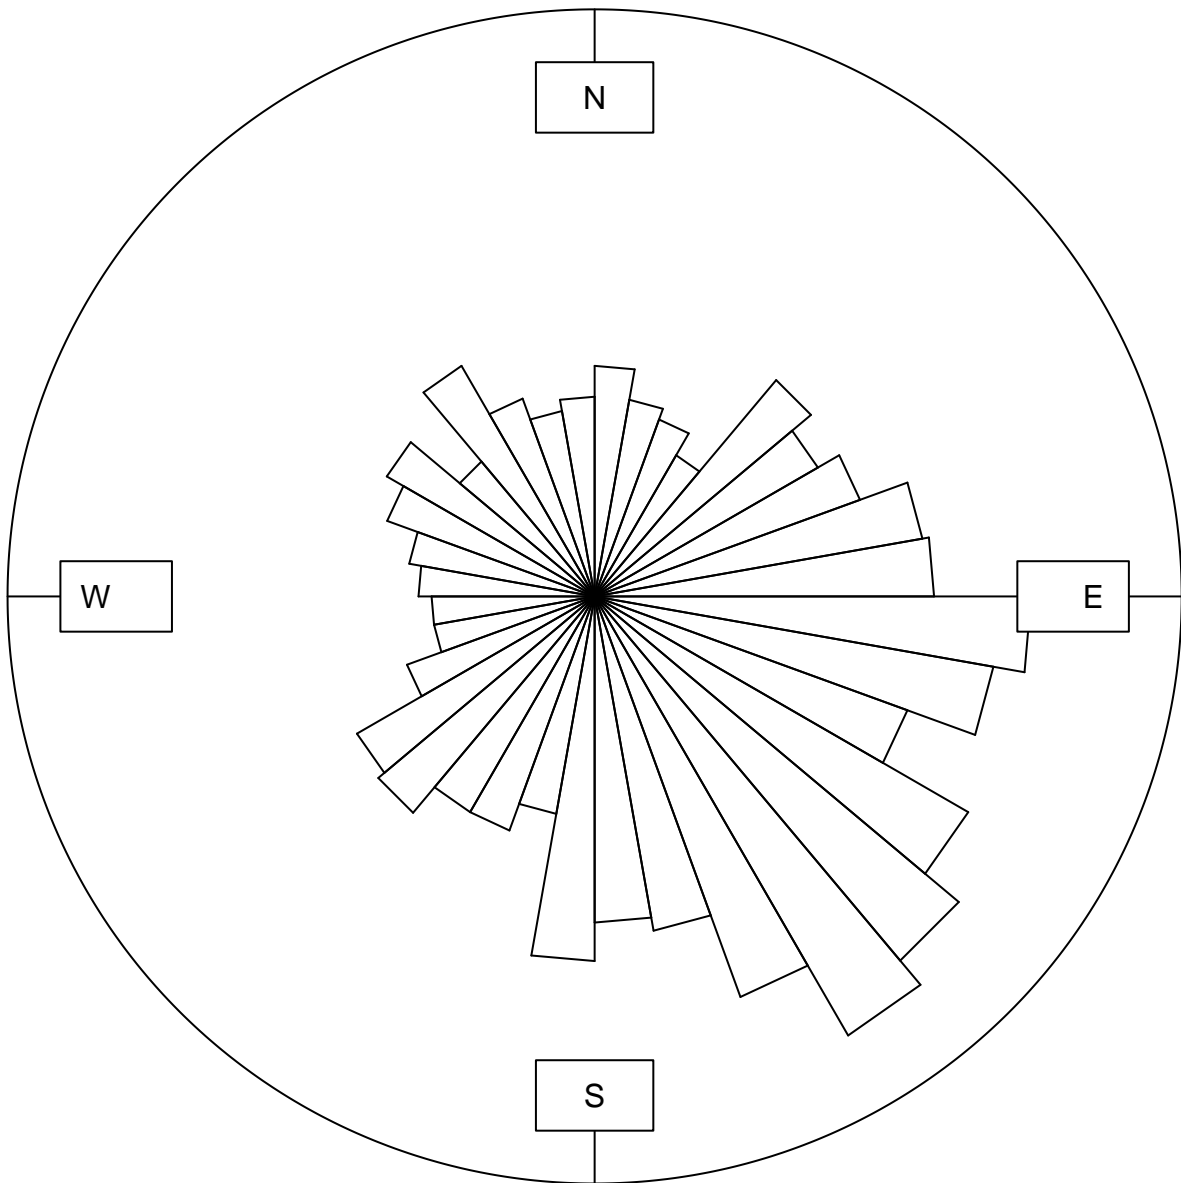



**bootstrap 473**

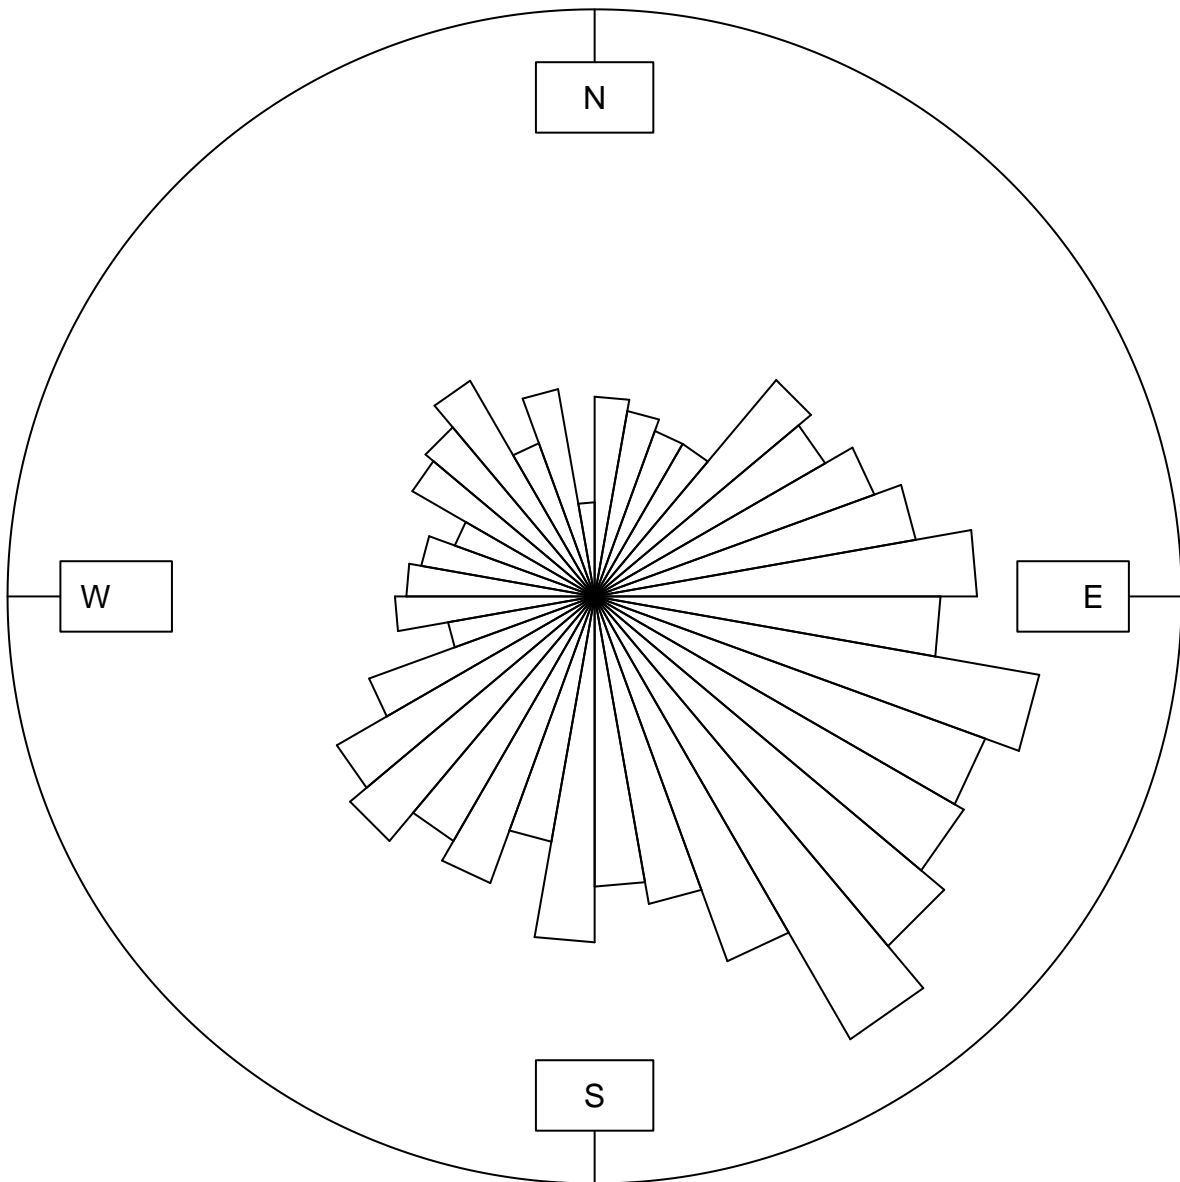

**bootstrap 474**

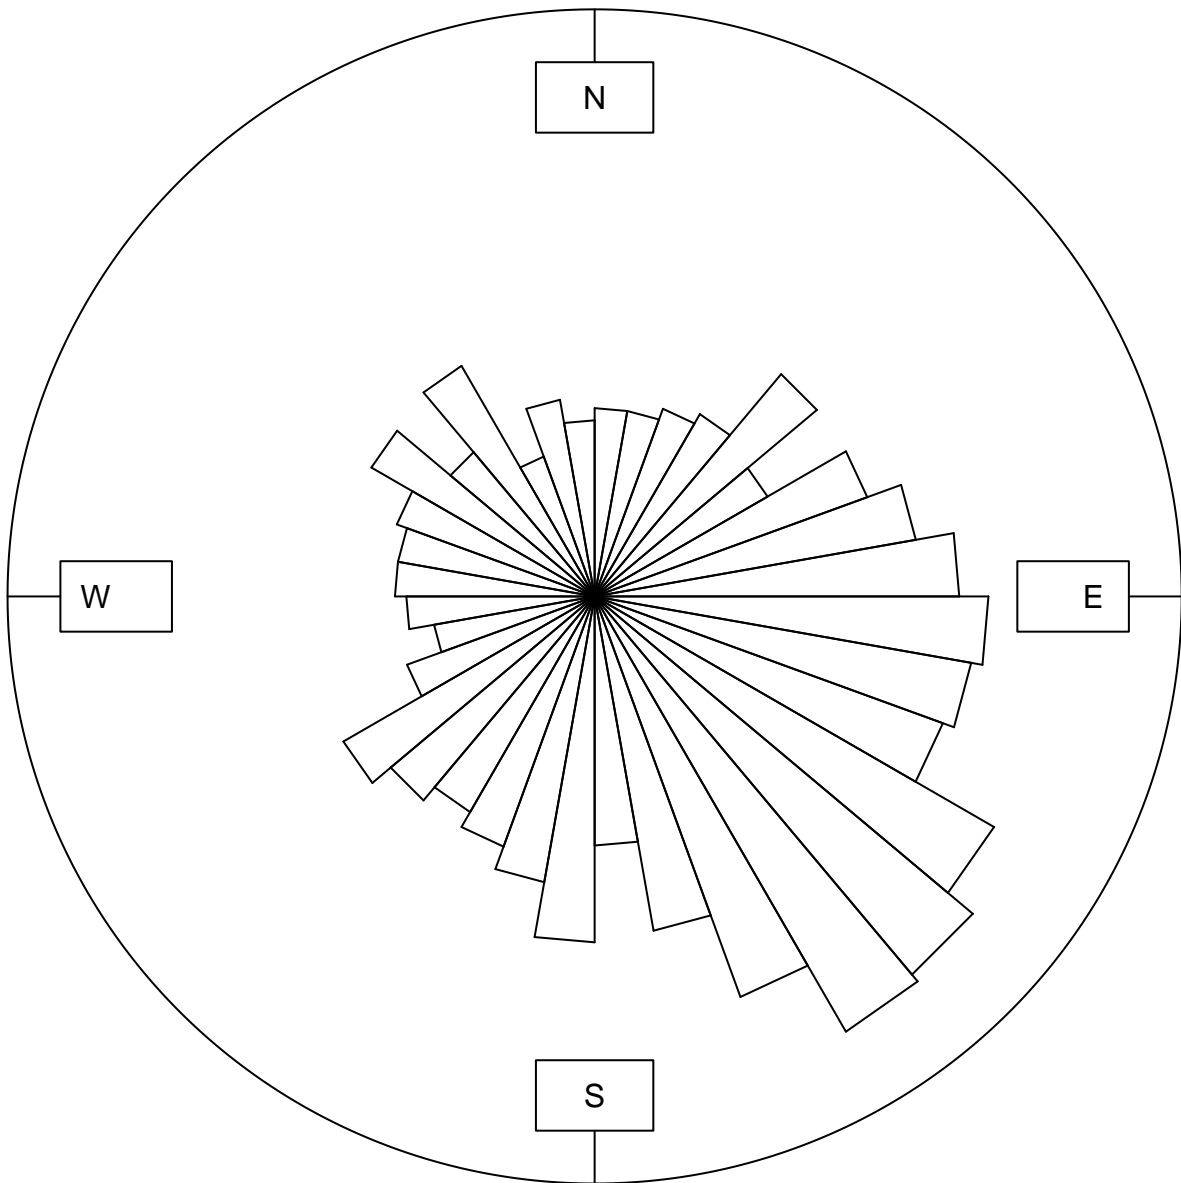

# bootstrap 475

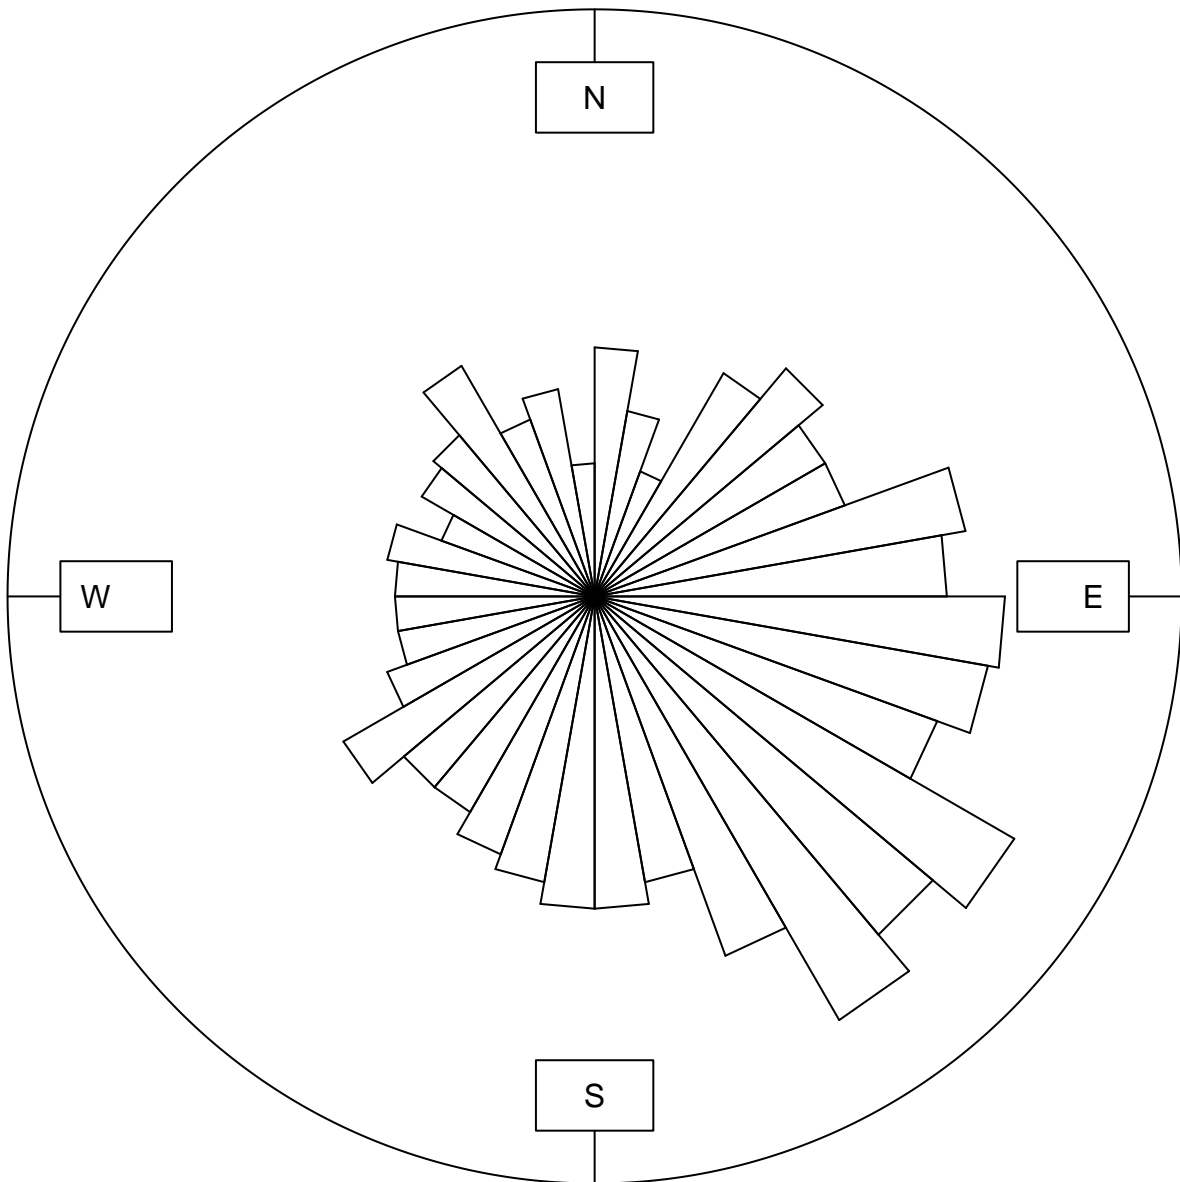

# bootstrap 476

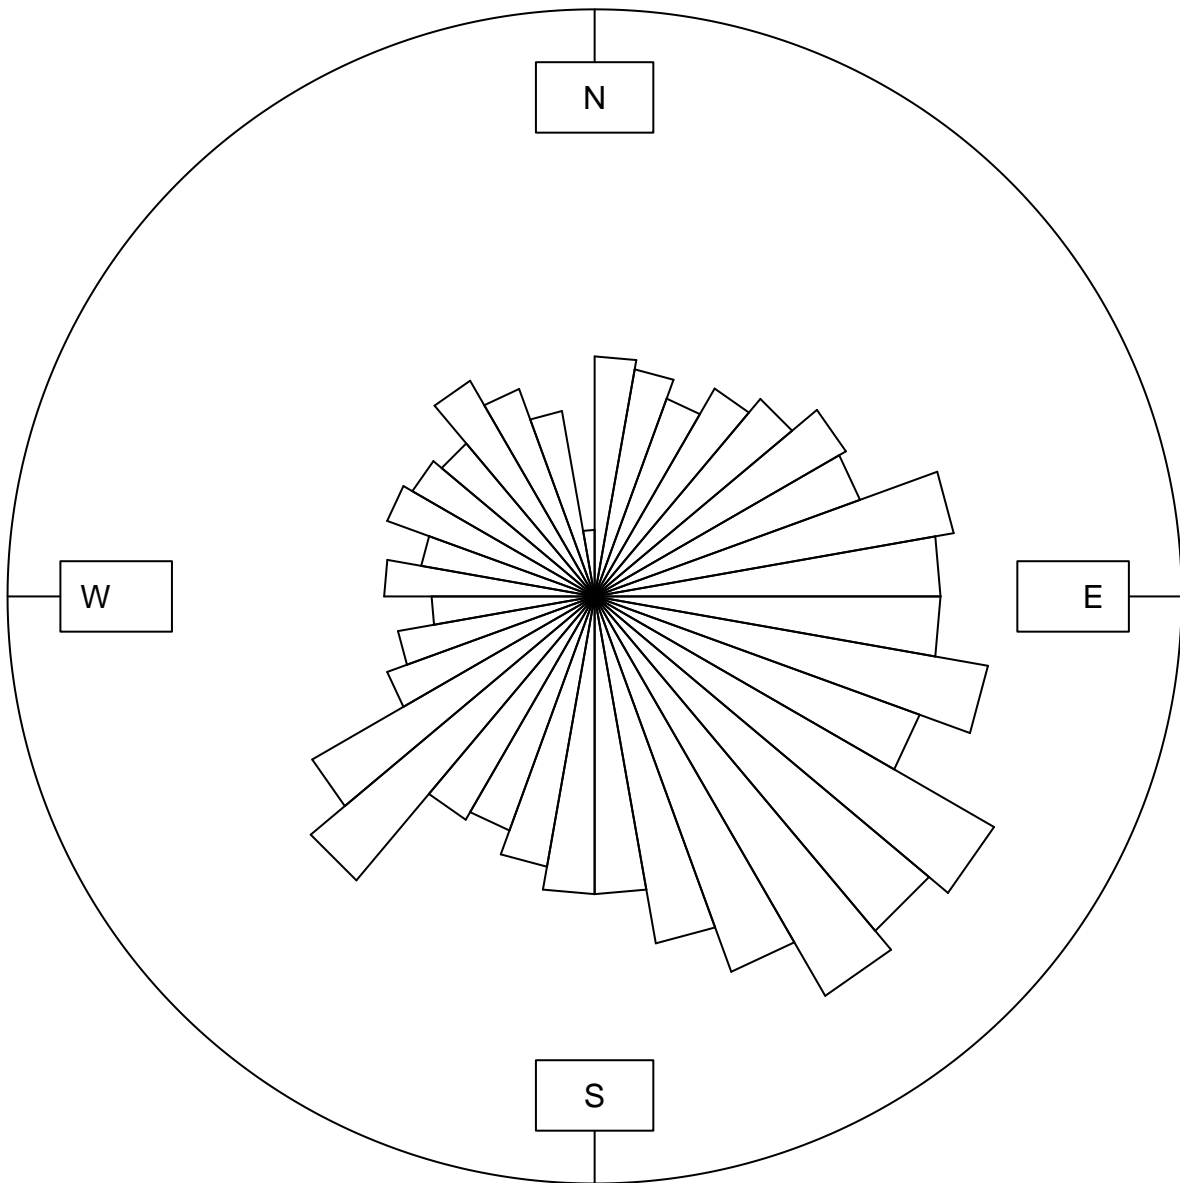

# bootstrap 477

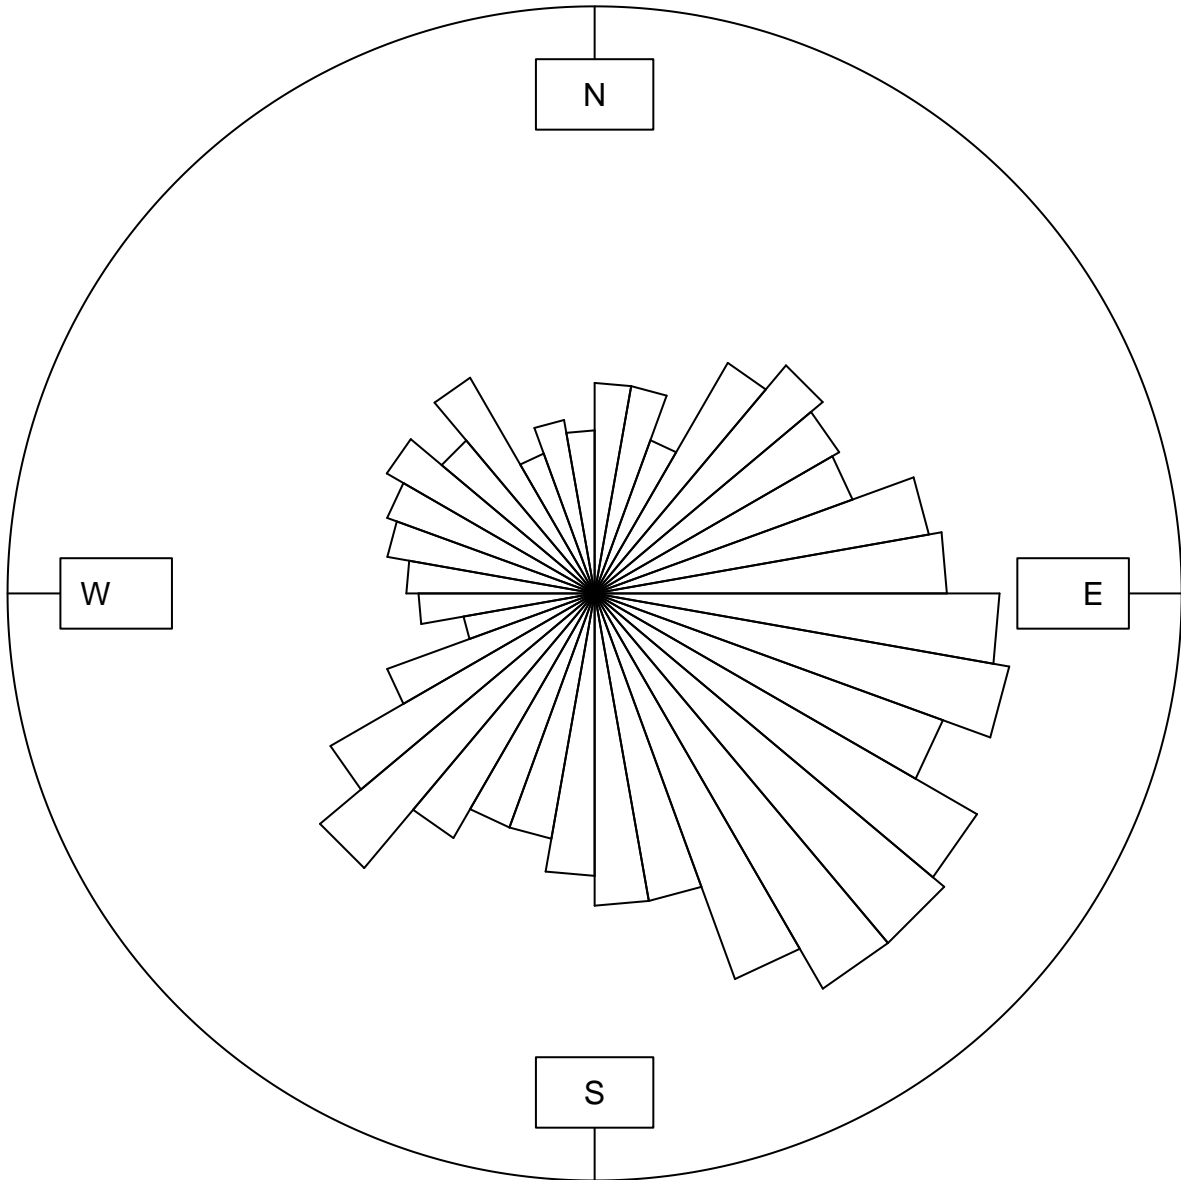

# bootstrap 478

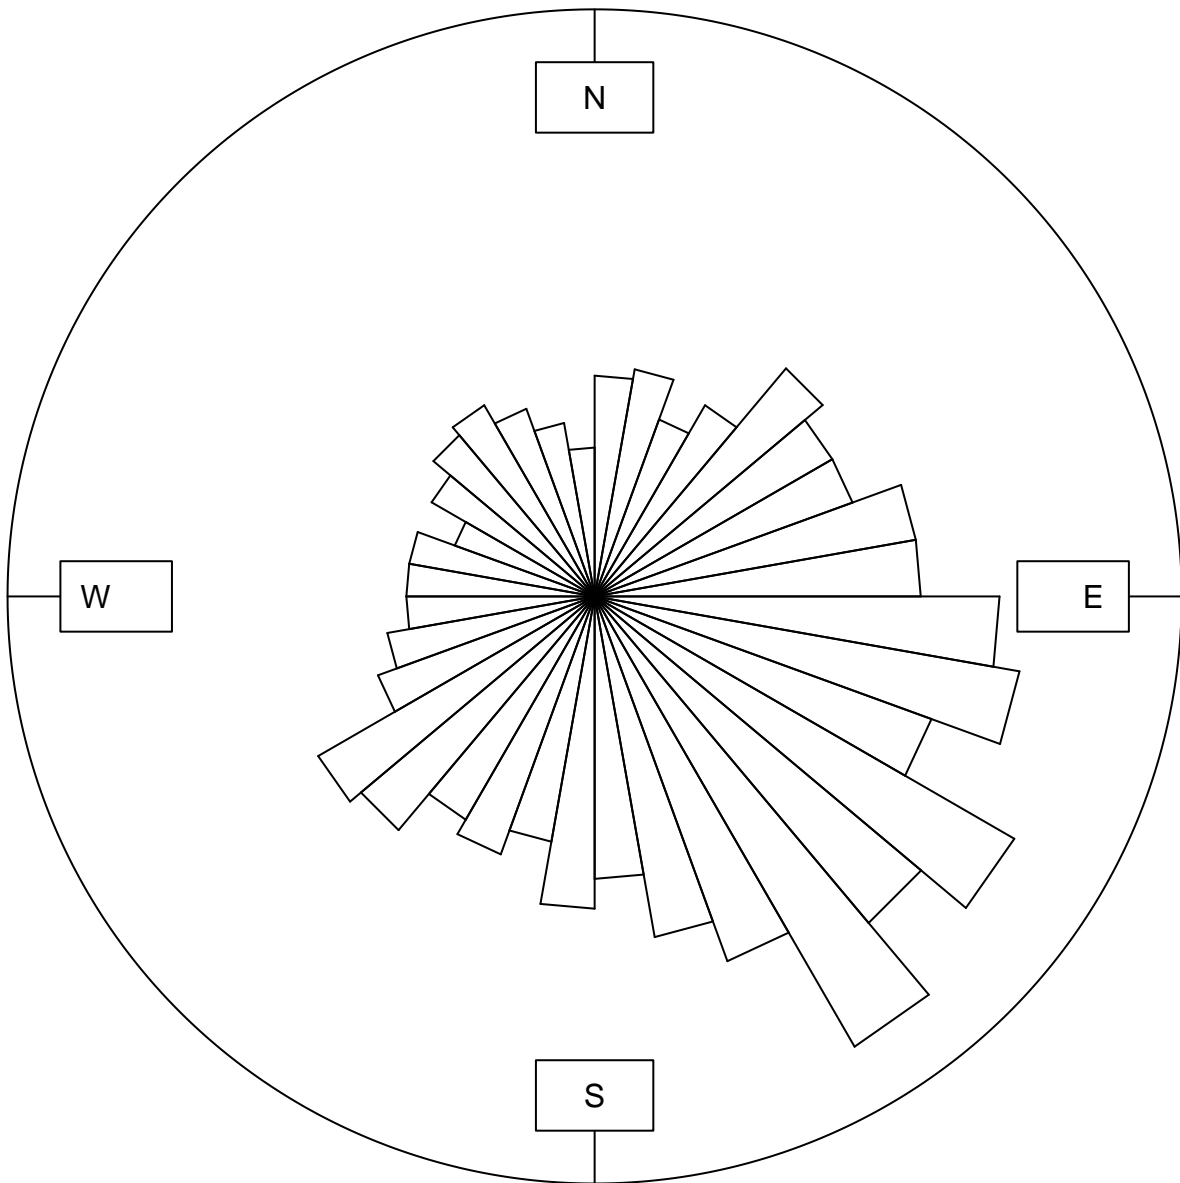

# bootstrap 479

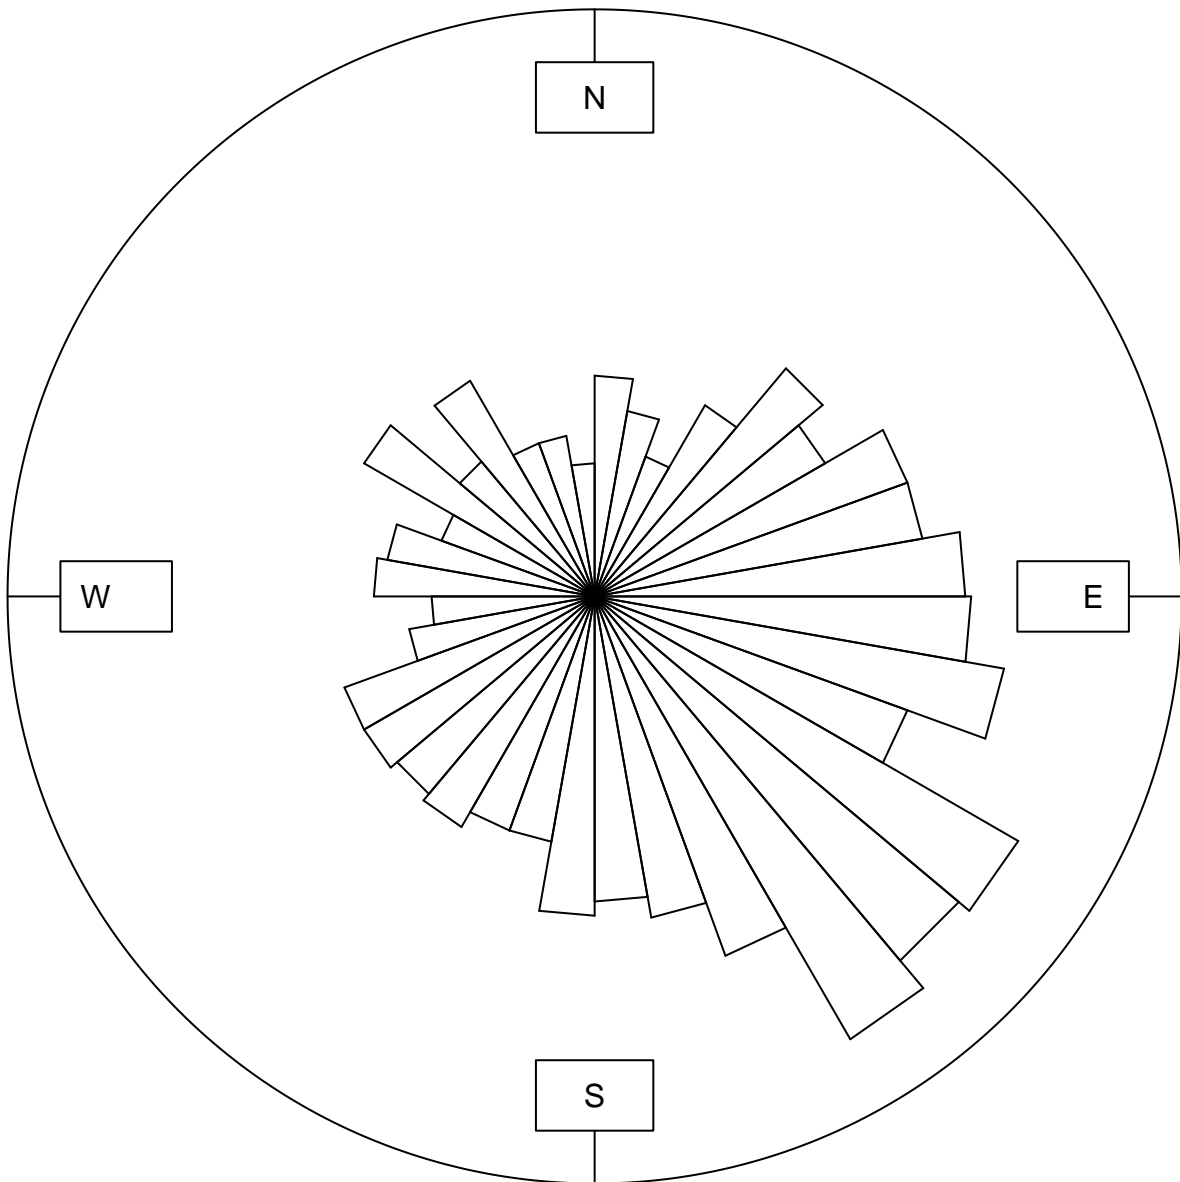

# bootstrap 480

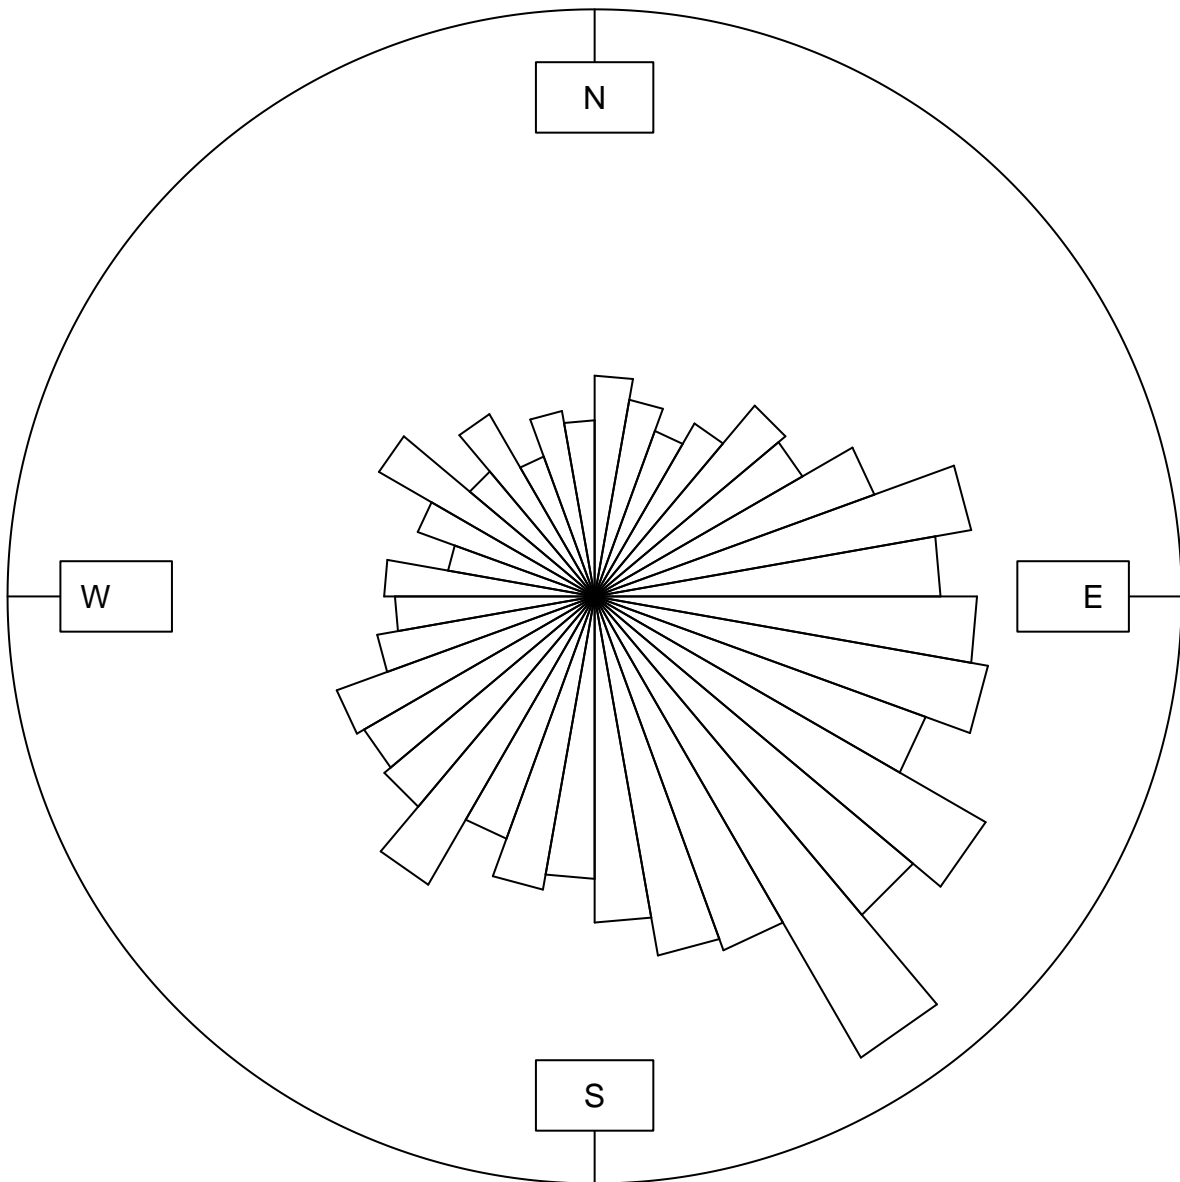



# bootstrap 481

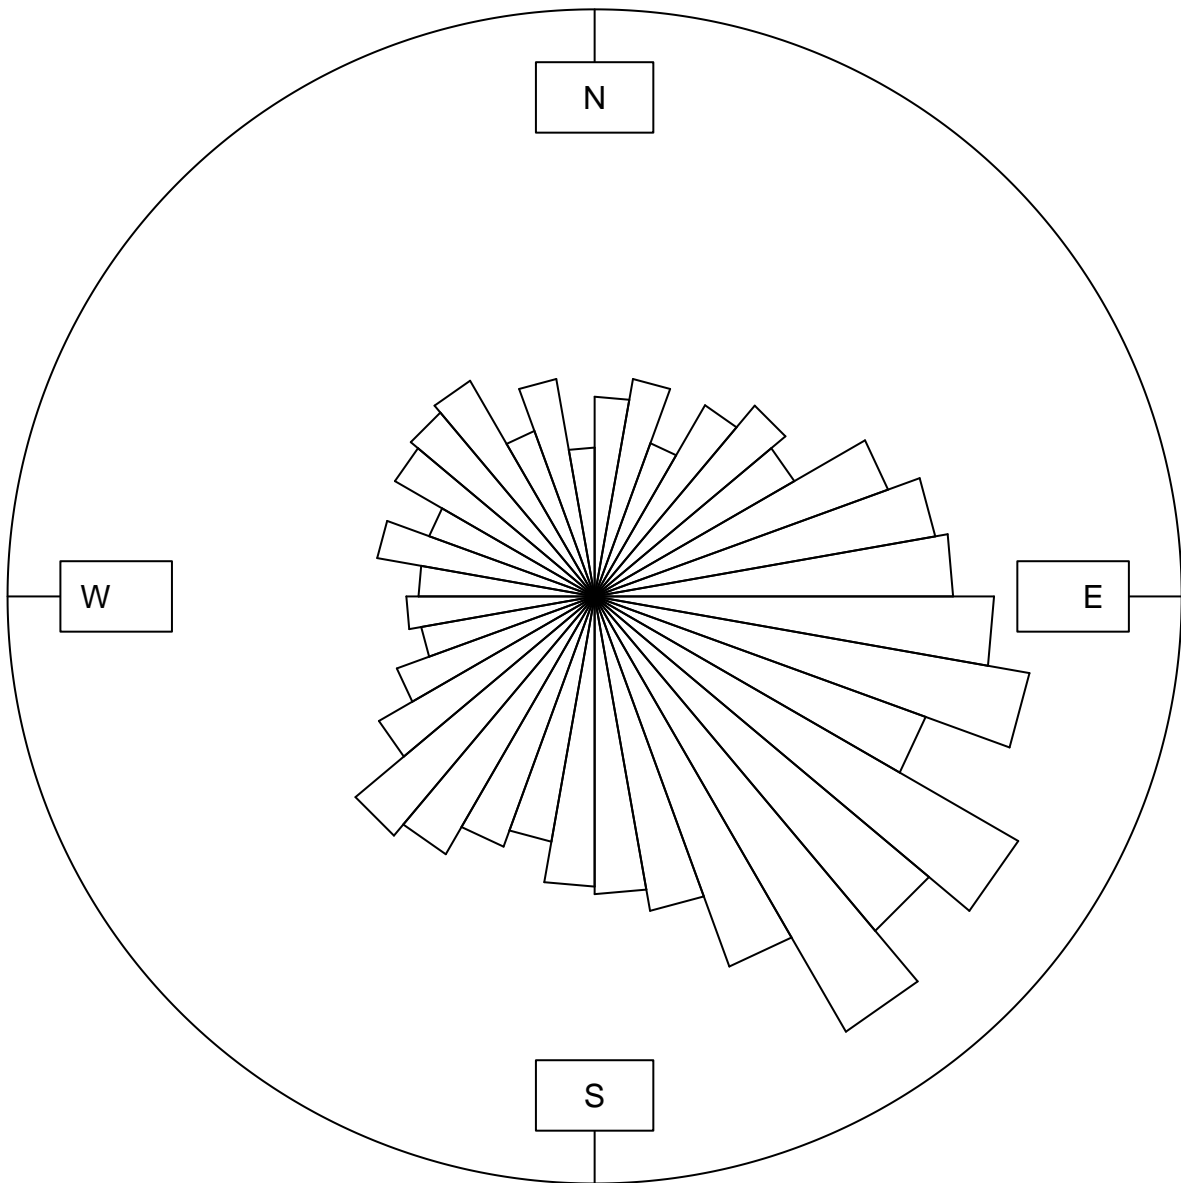

# bootstrap 482

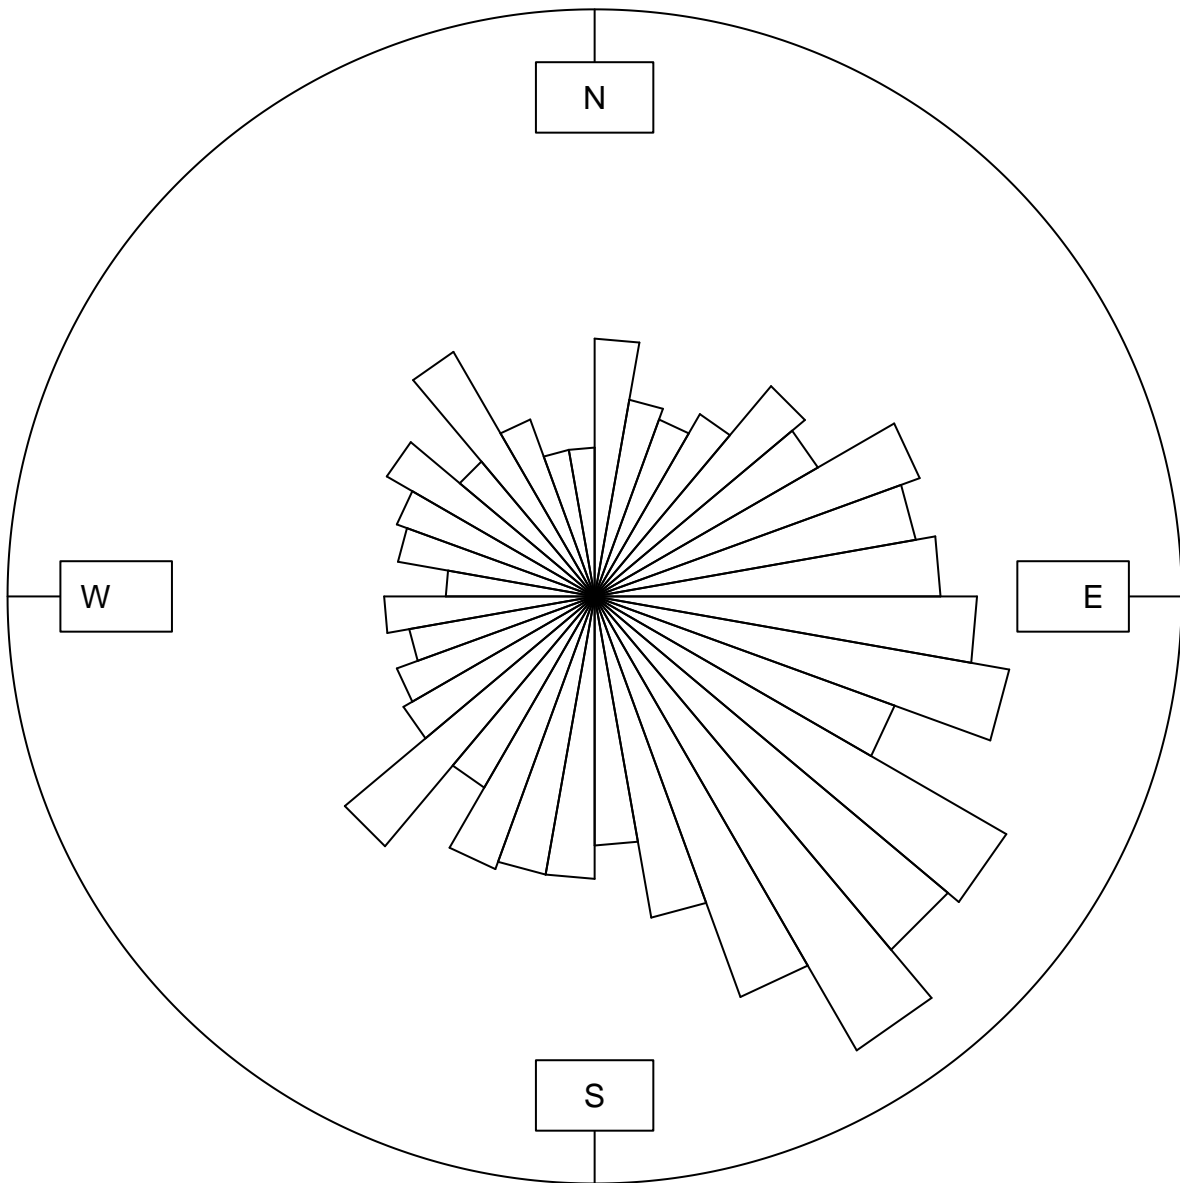

# bootstrap 483

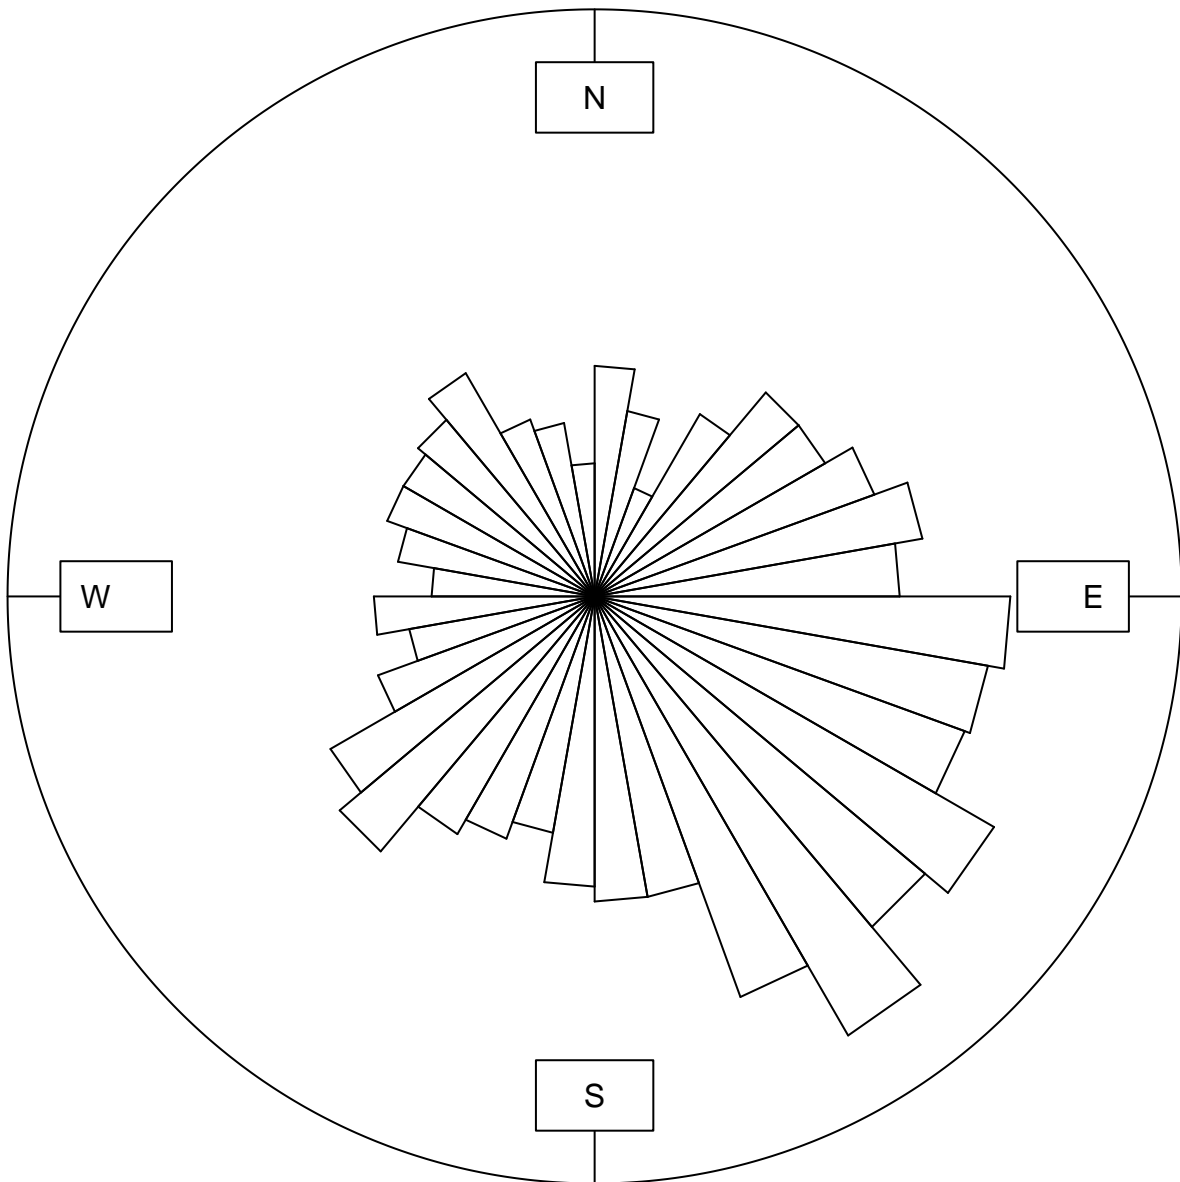

# bootstrap 484

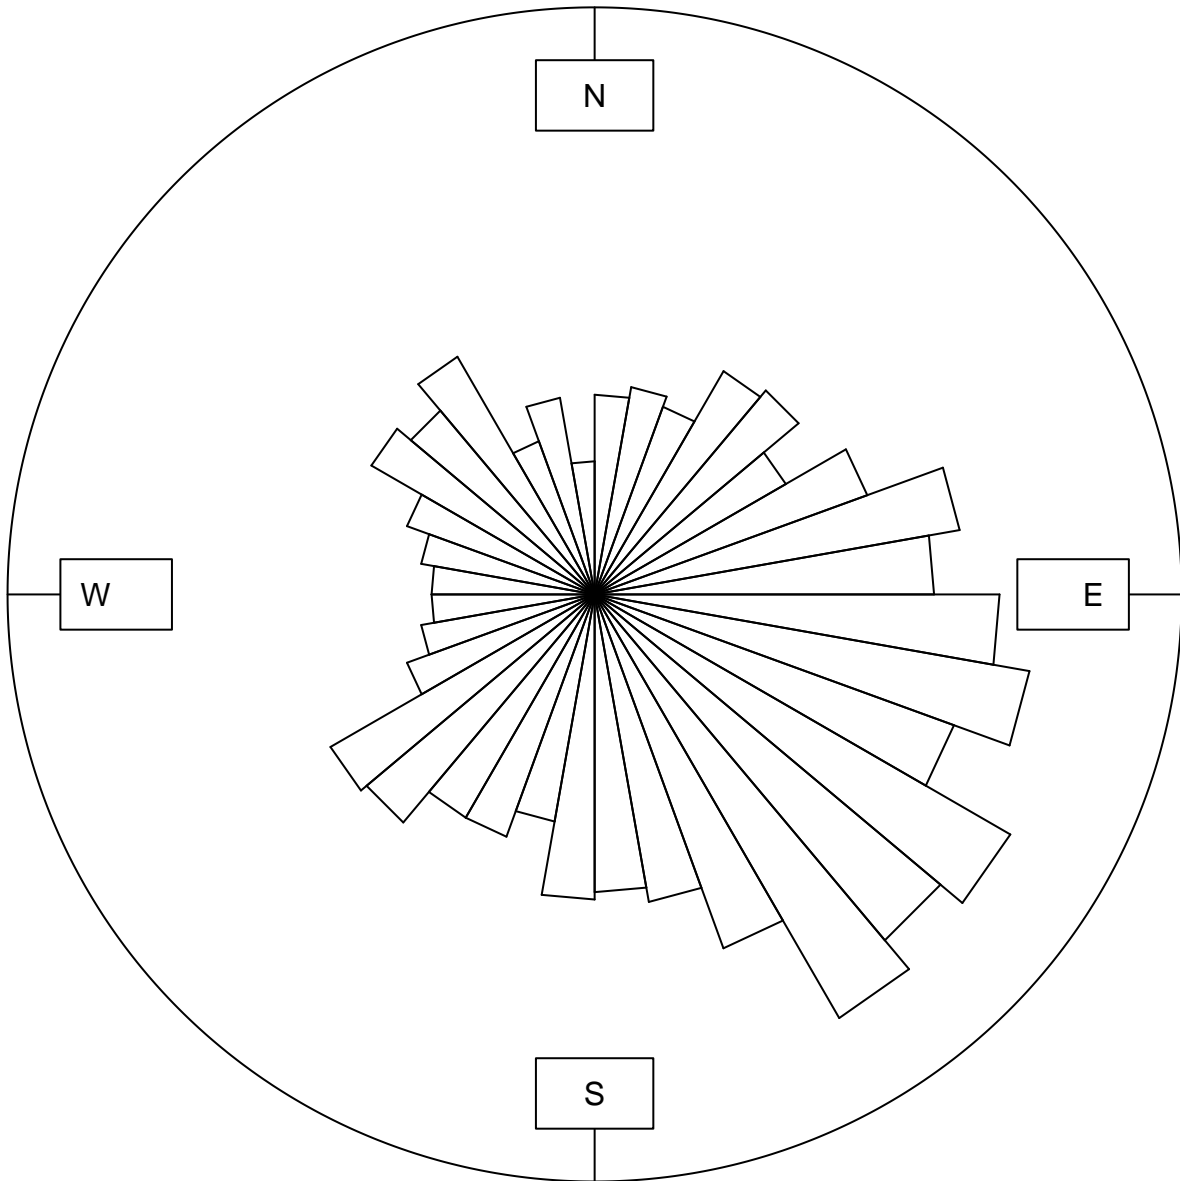

# bootstrap 485

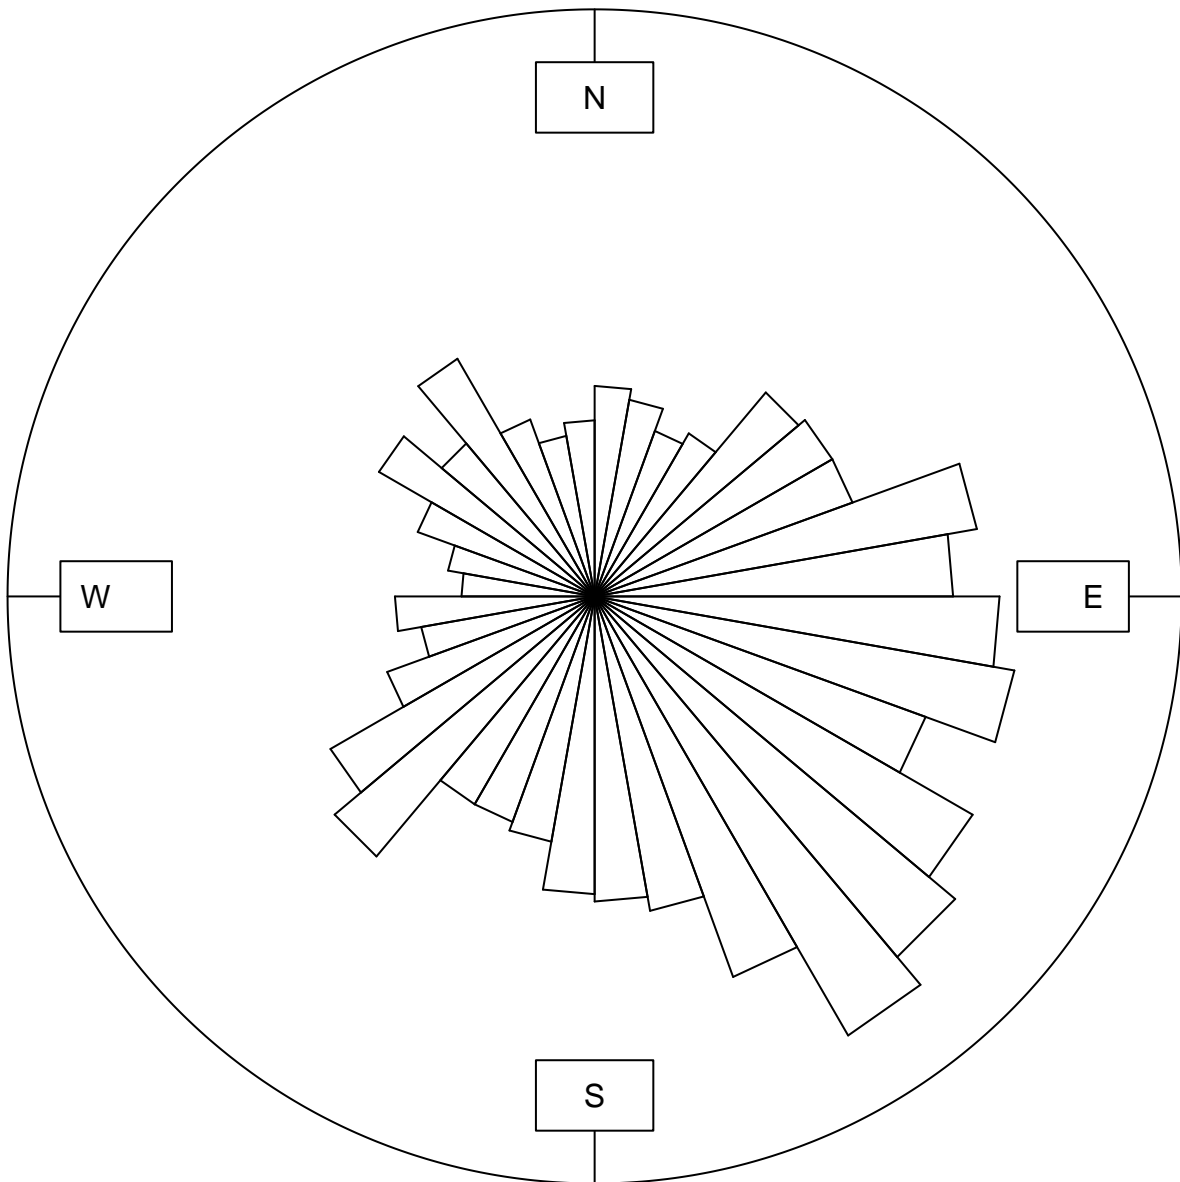

# bootstrap 486

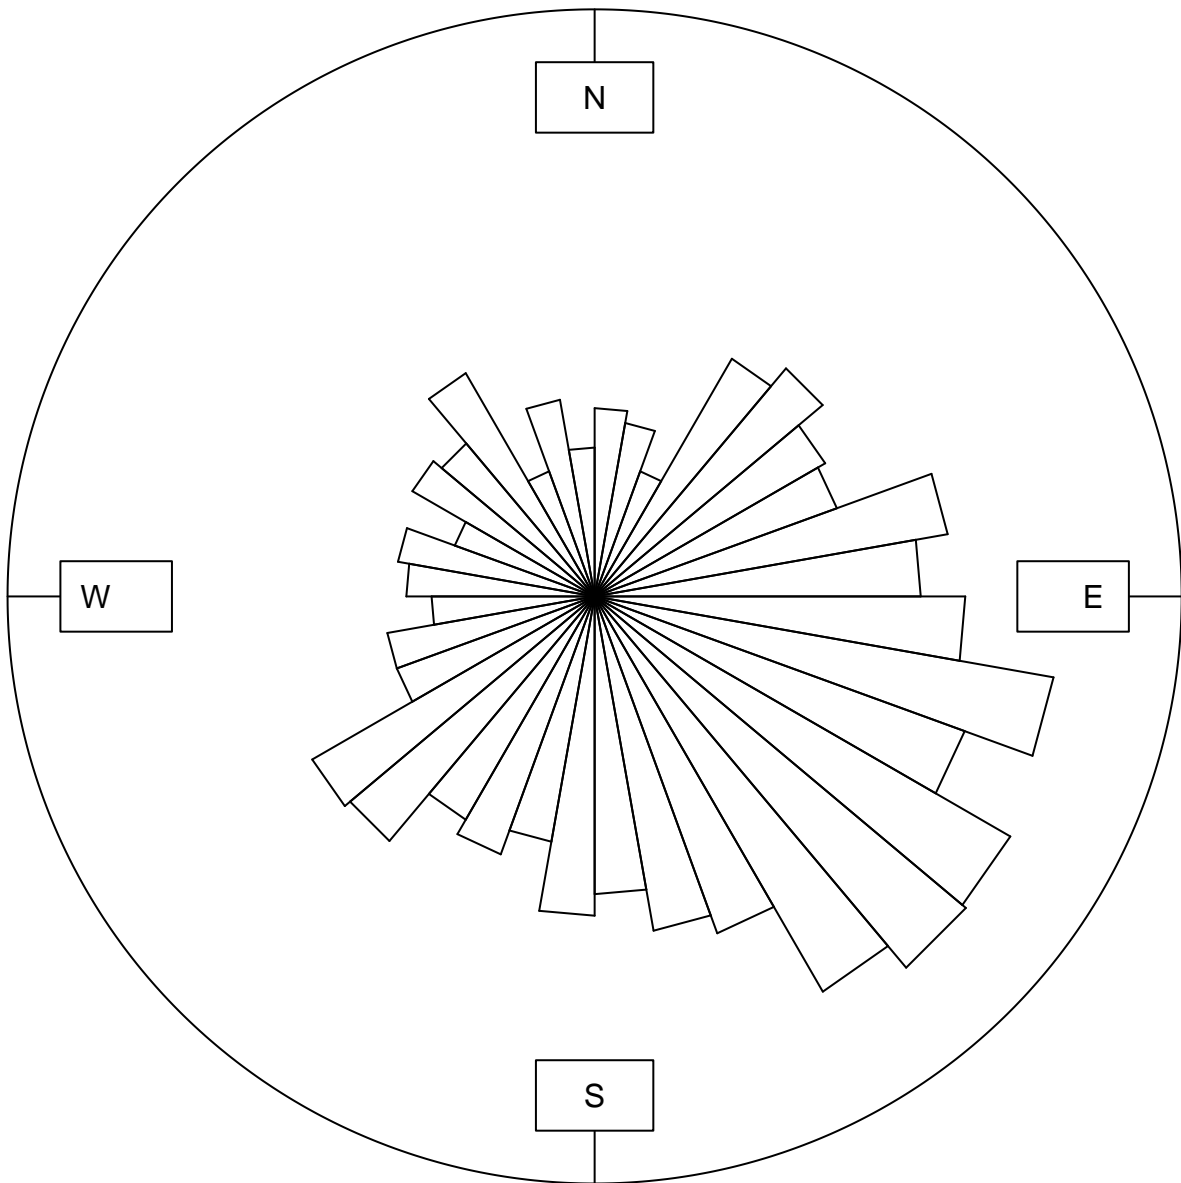

bootstrap 487

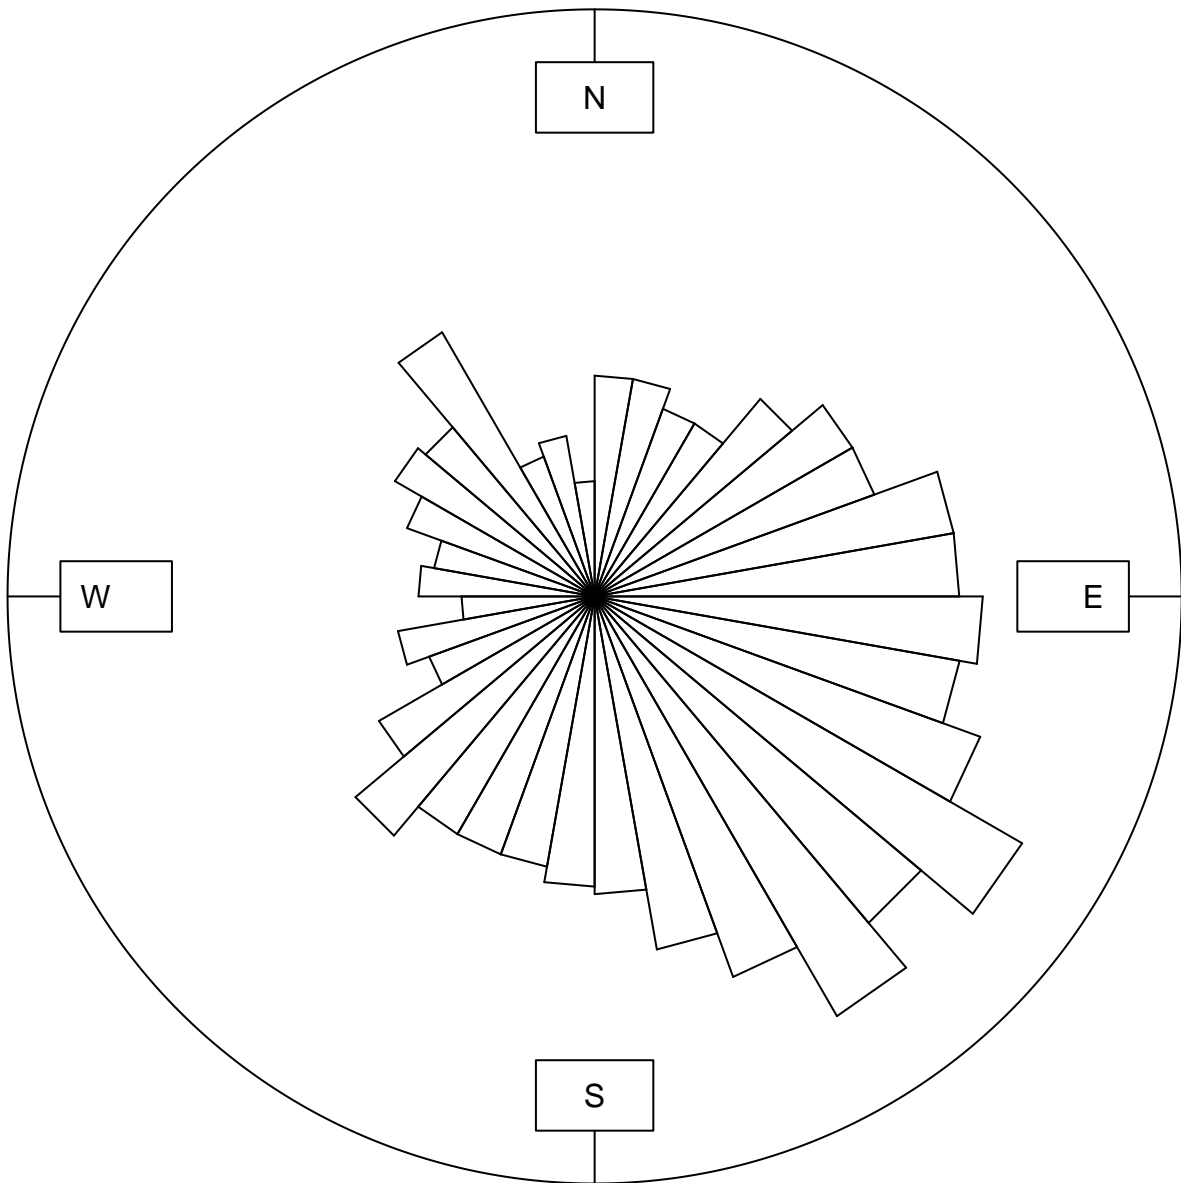

# bootstrap 488

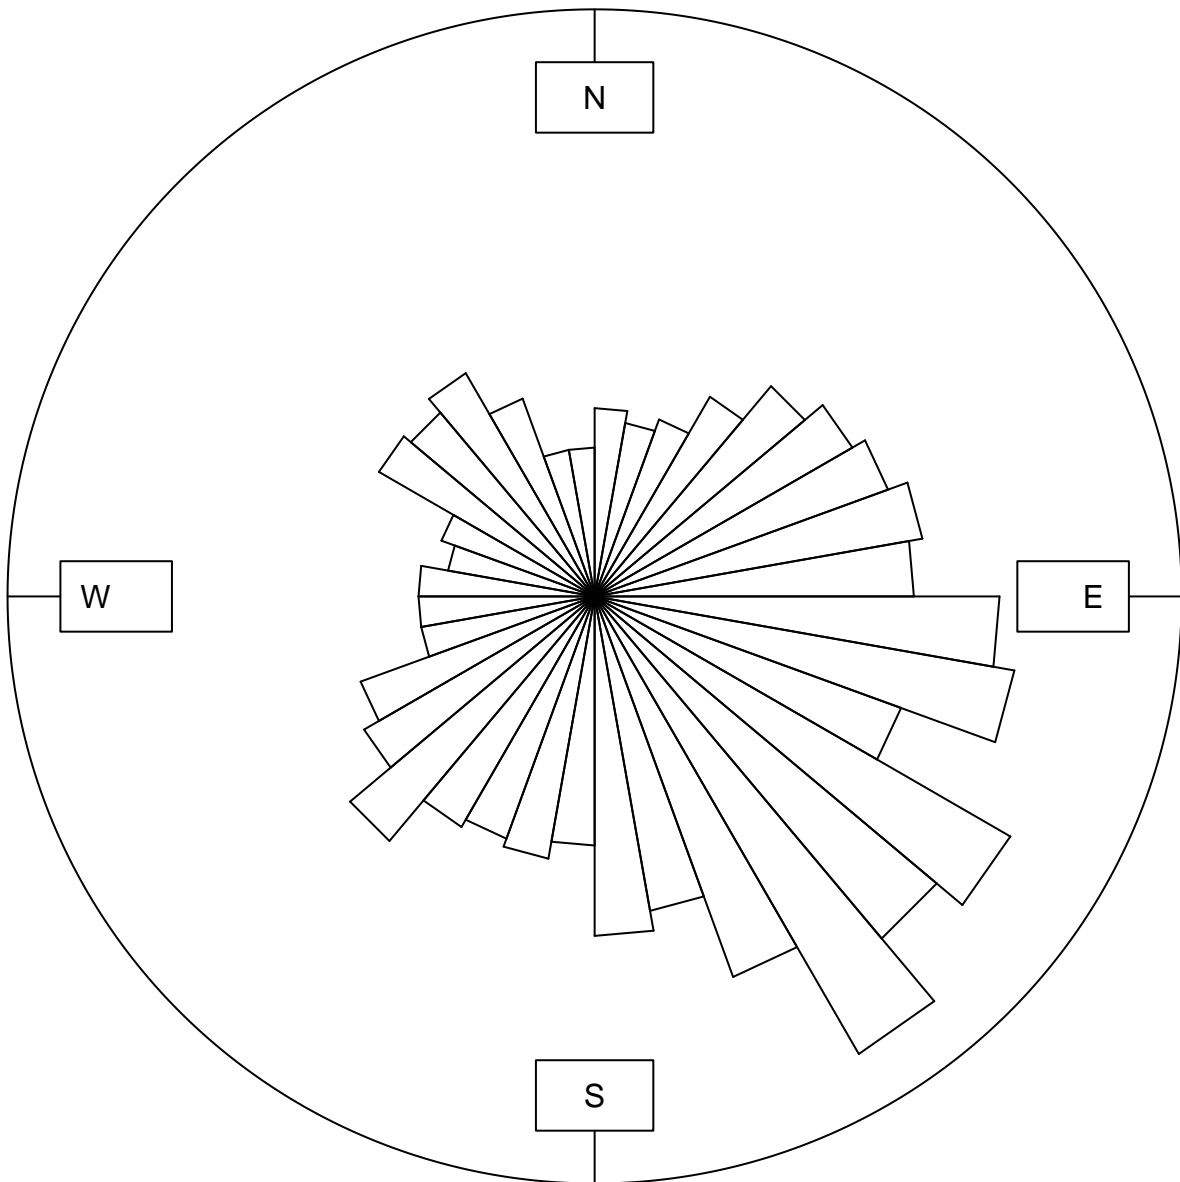



# bootstrap 489

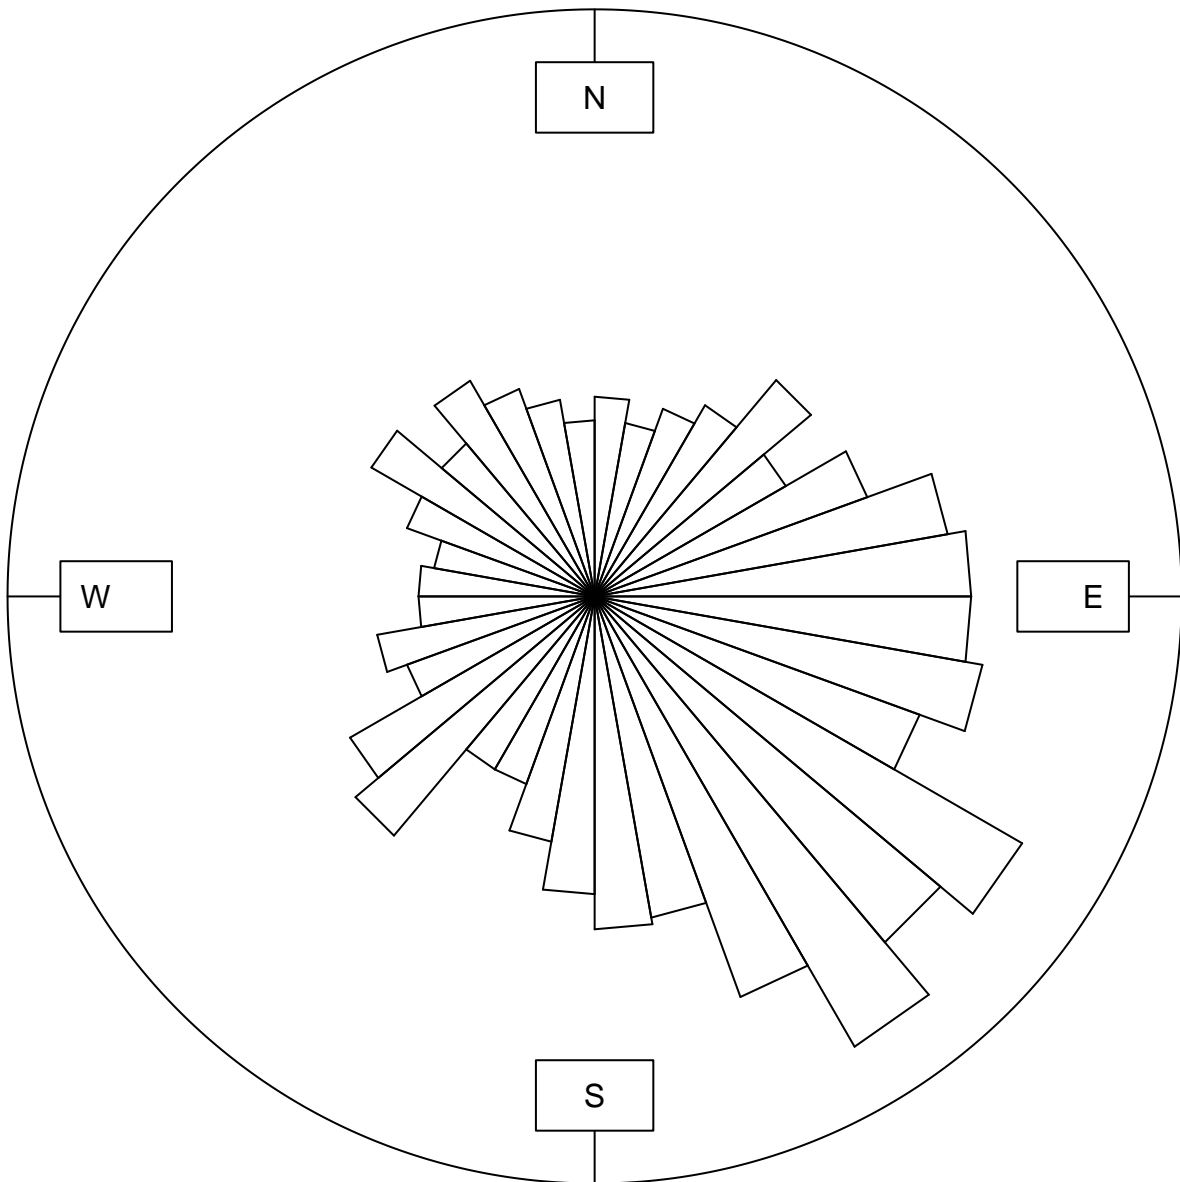

**bootstrap 490**

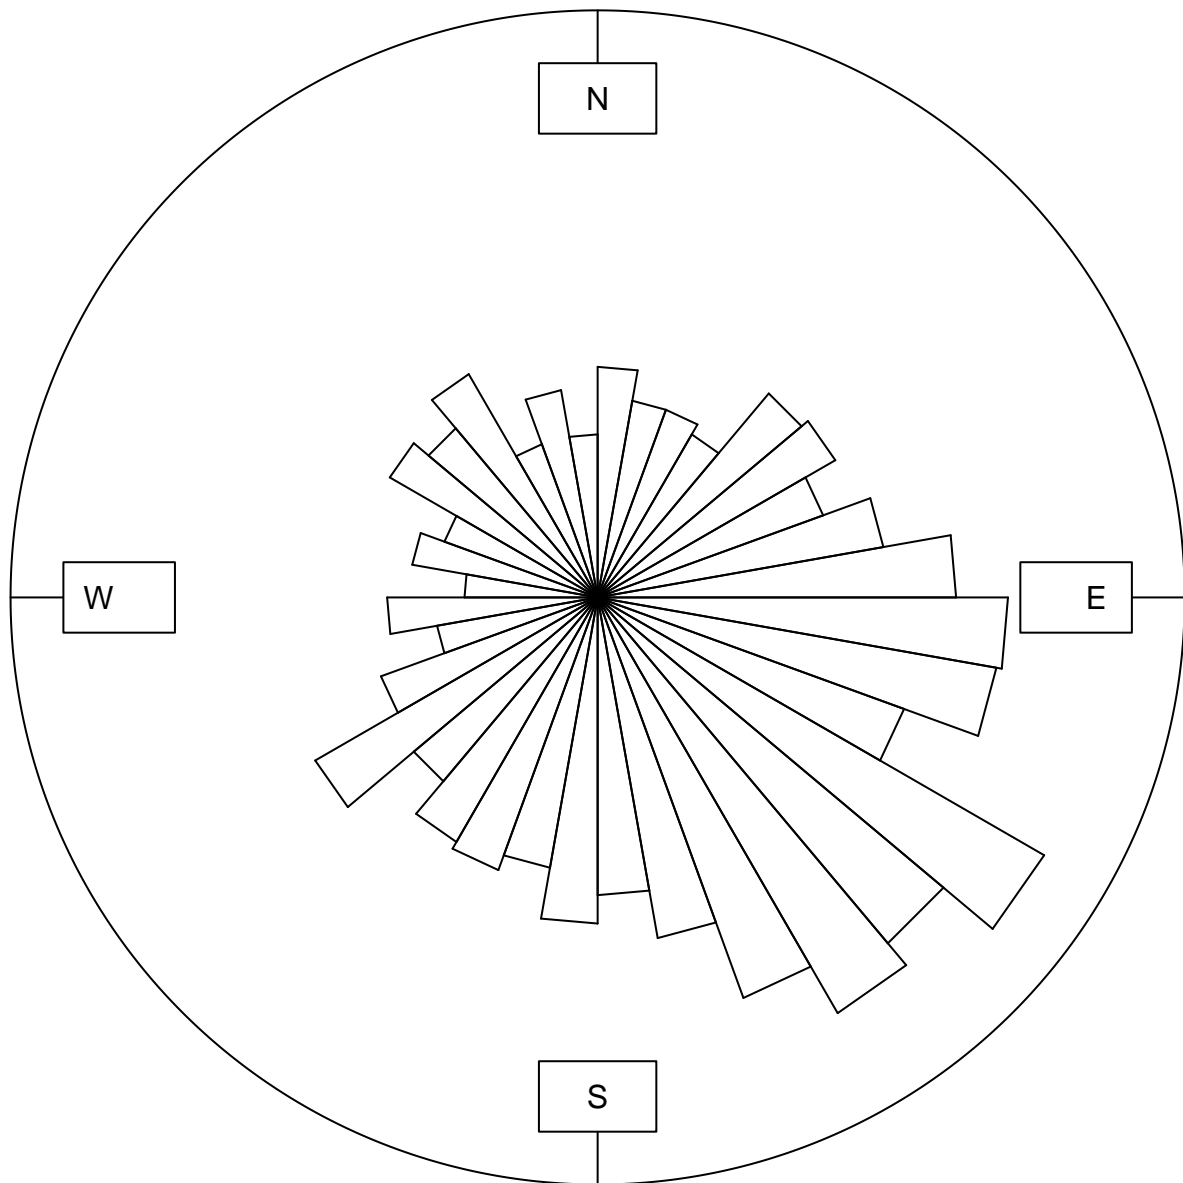

# bootstrap 491

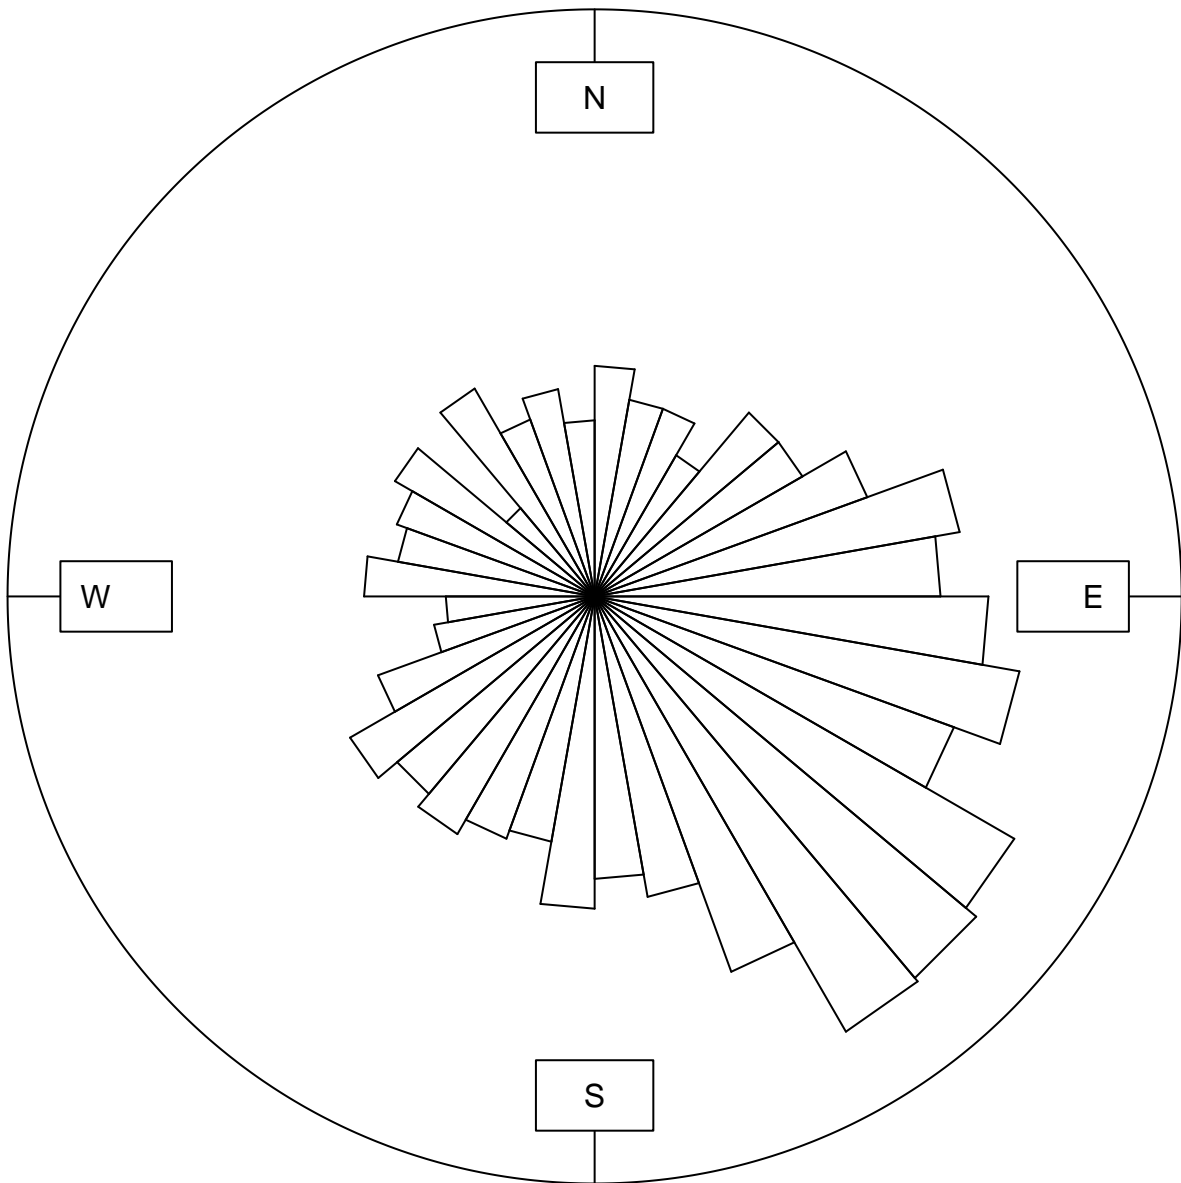

# bootstrap 492

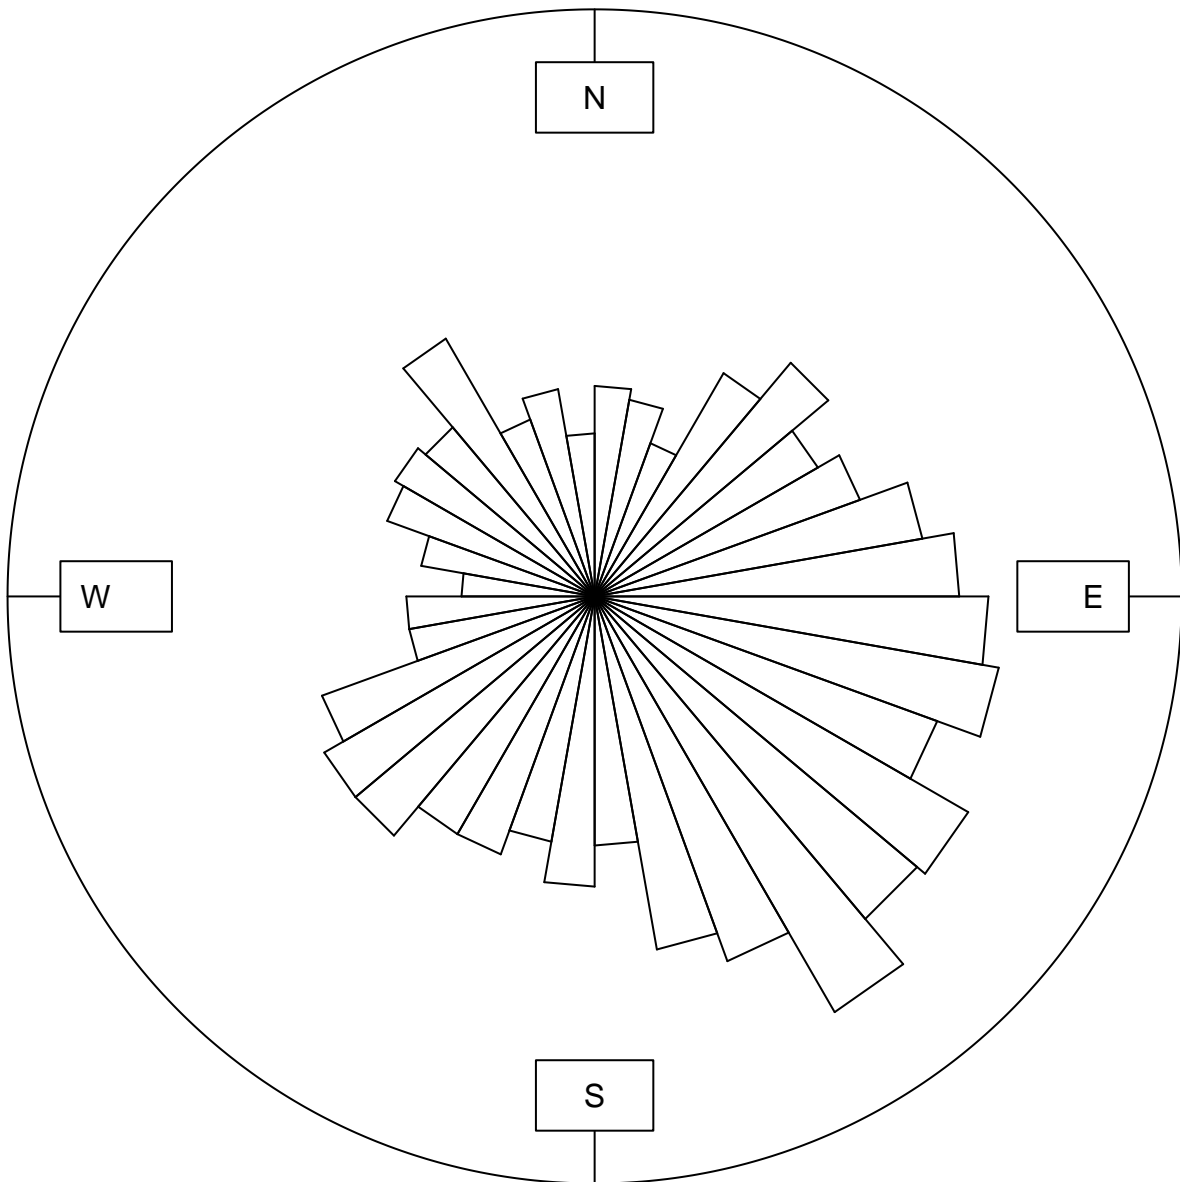

# bootstrap 493

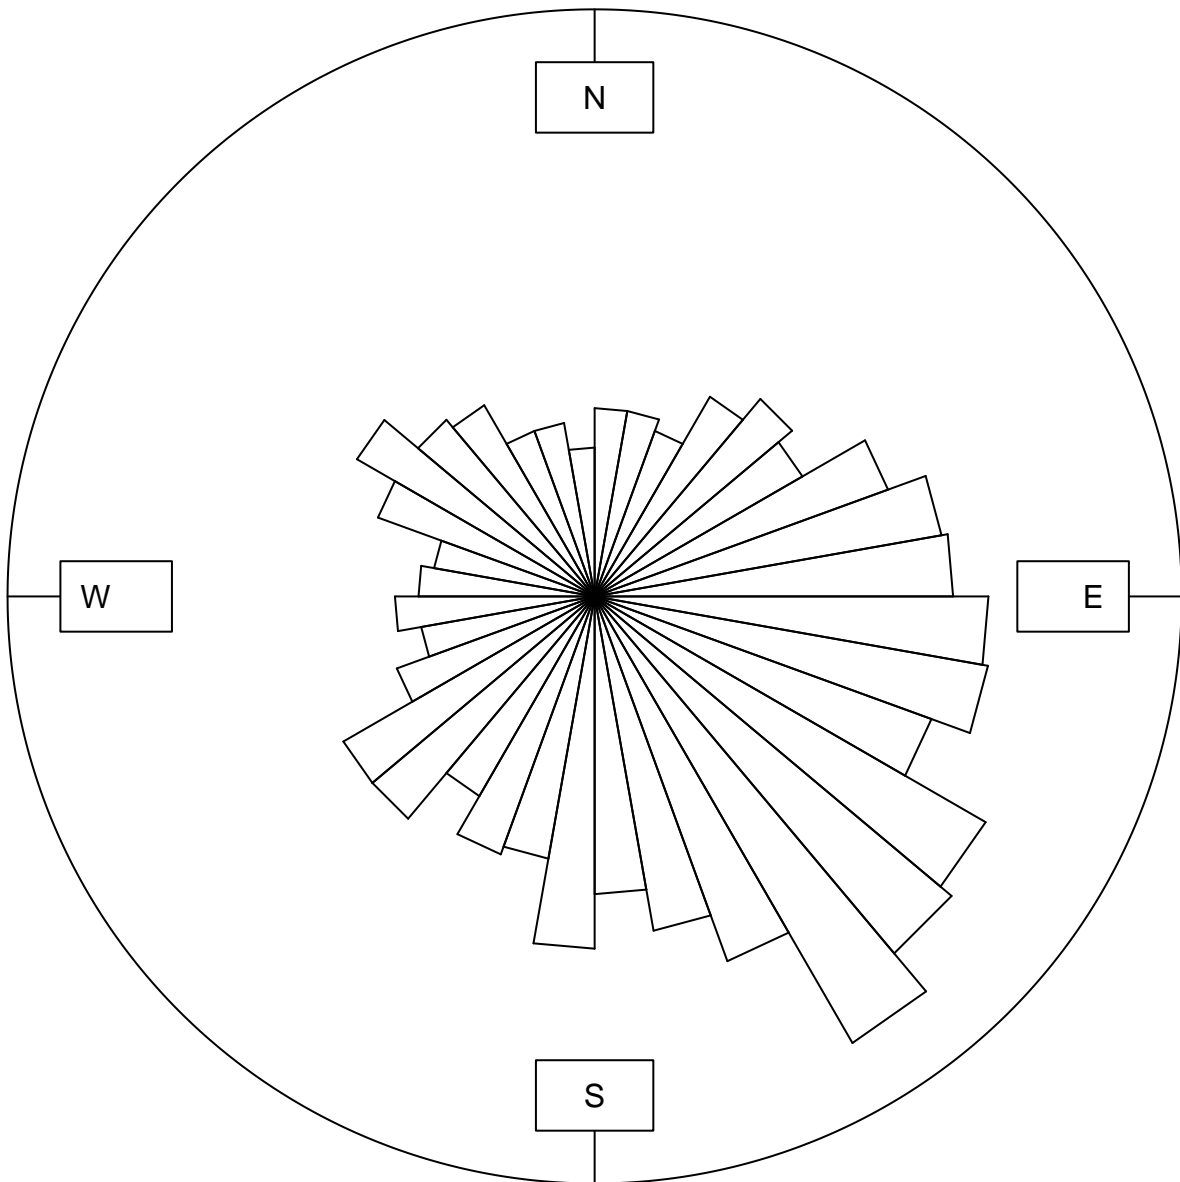

**bootstrap 494**

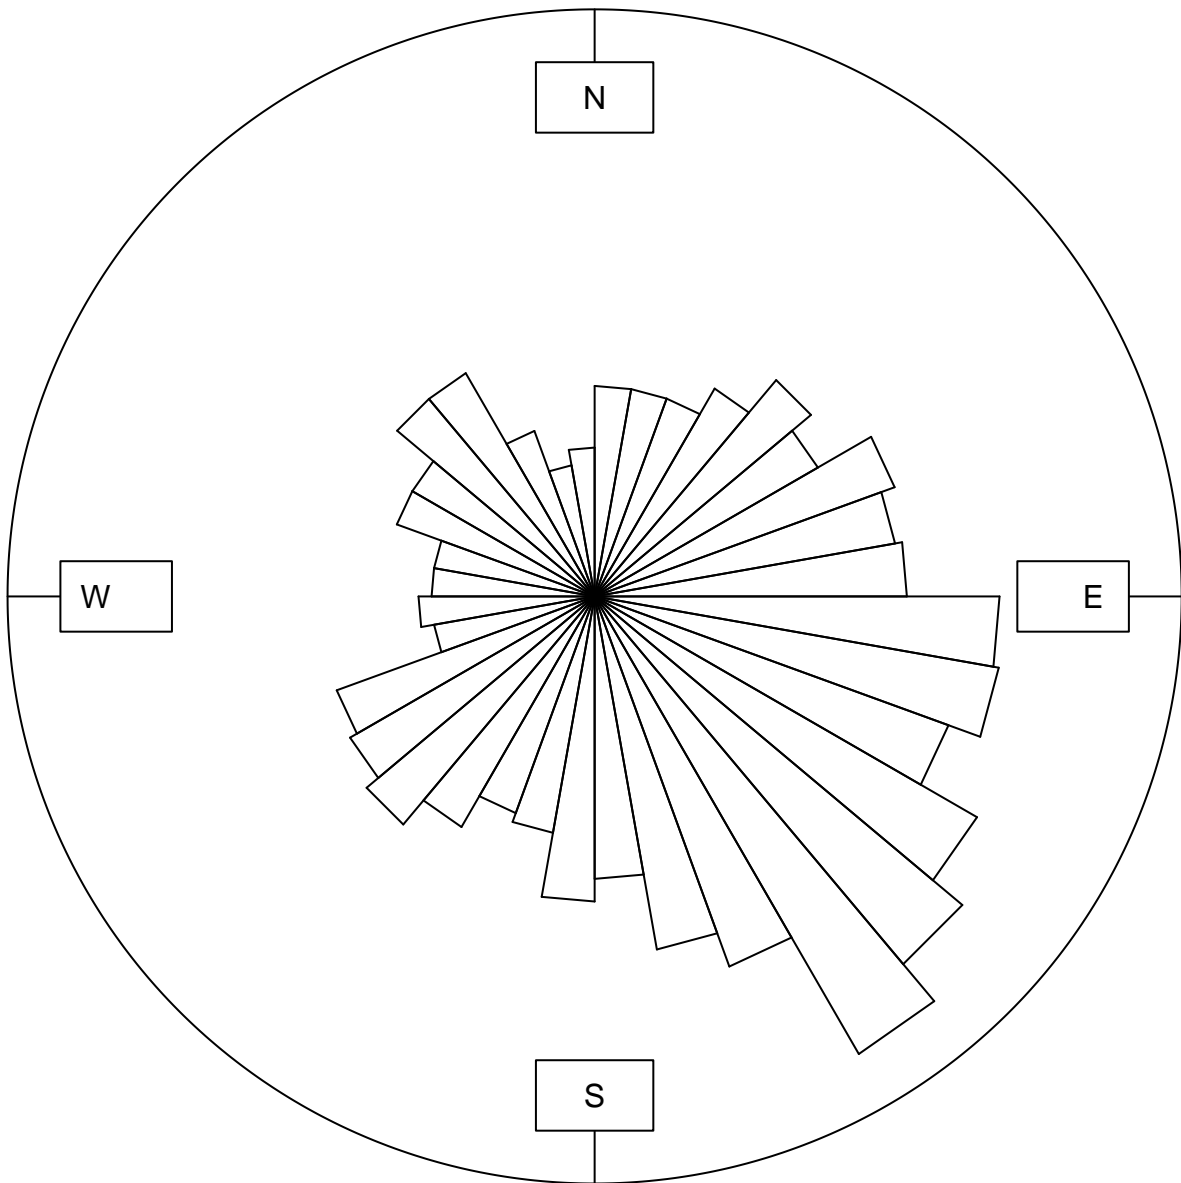

# bootstrap 495

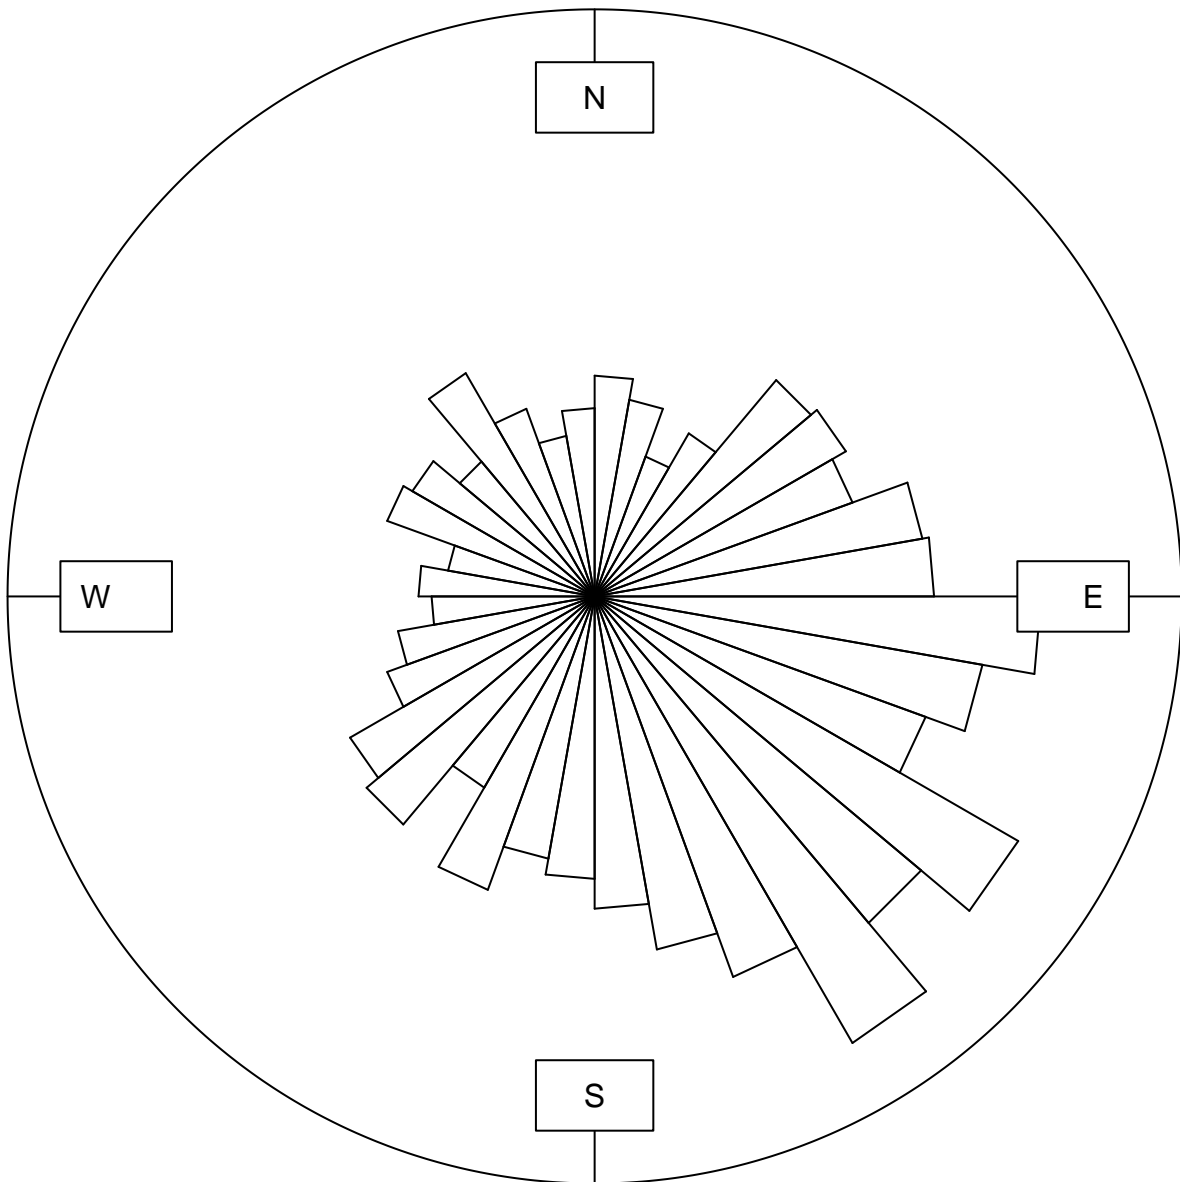

# bootstrap 496

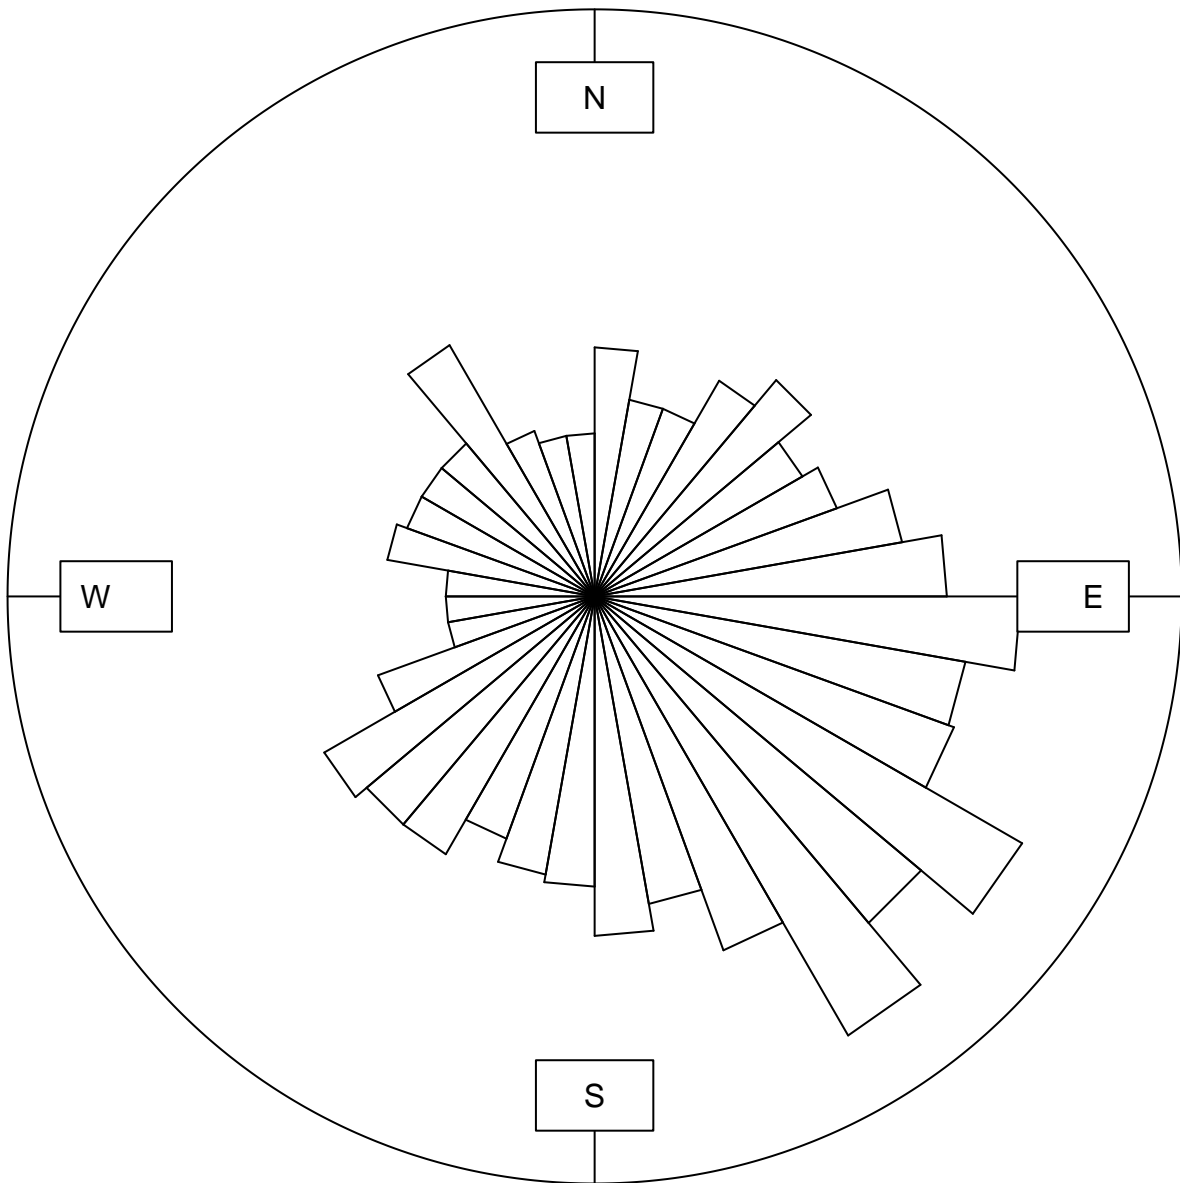



**bootstrap 497**

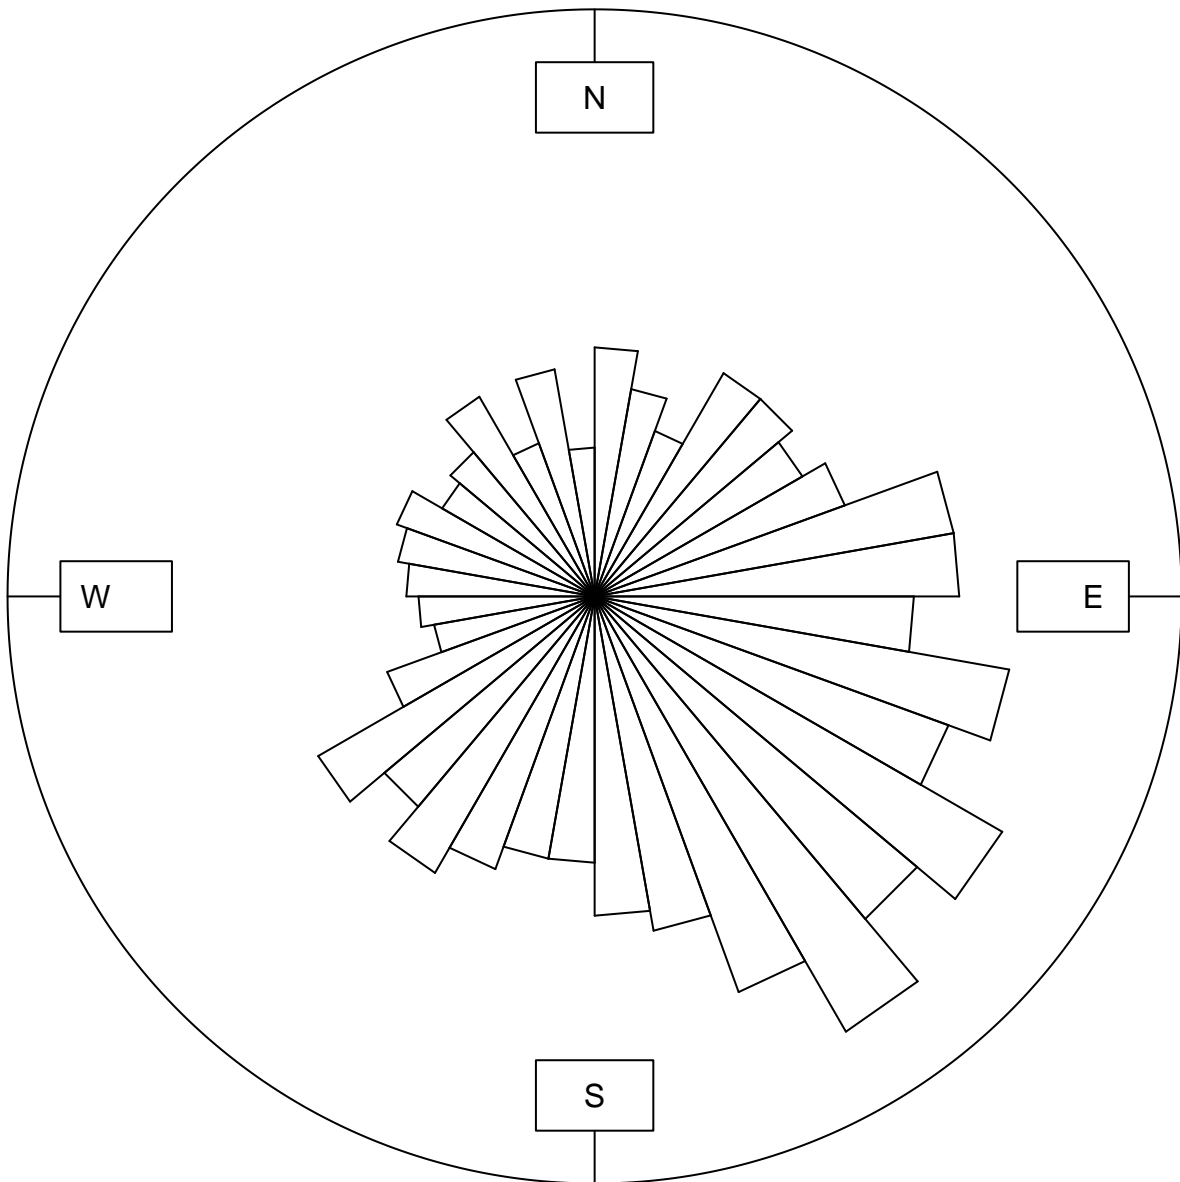

# bootstrap 498

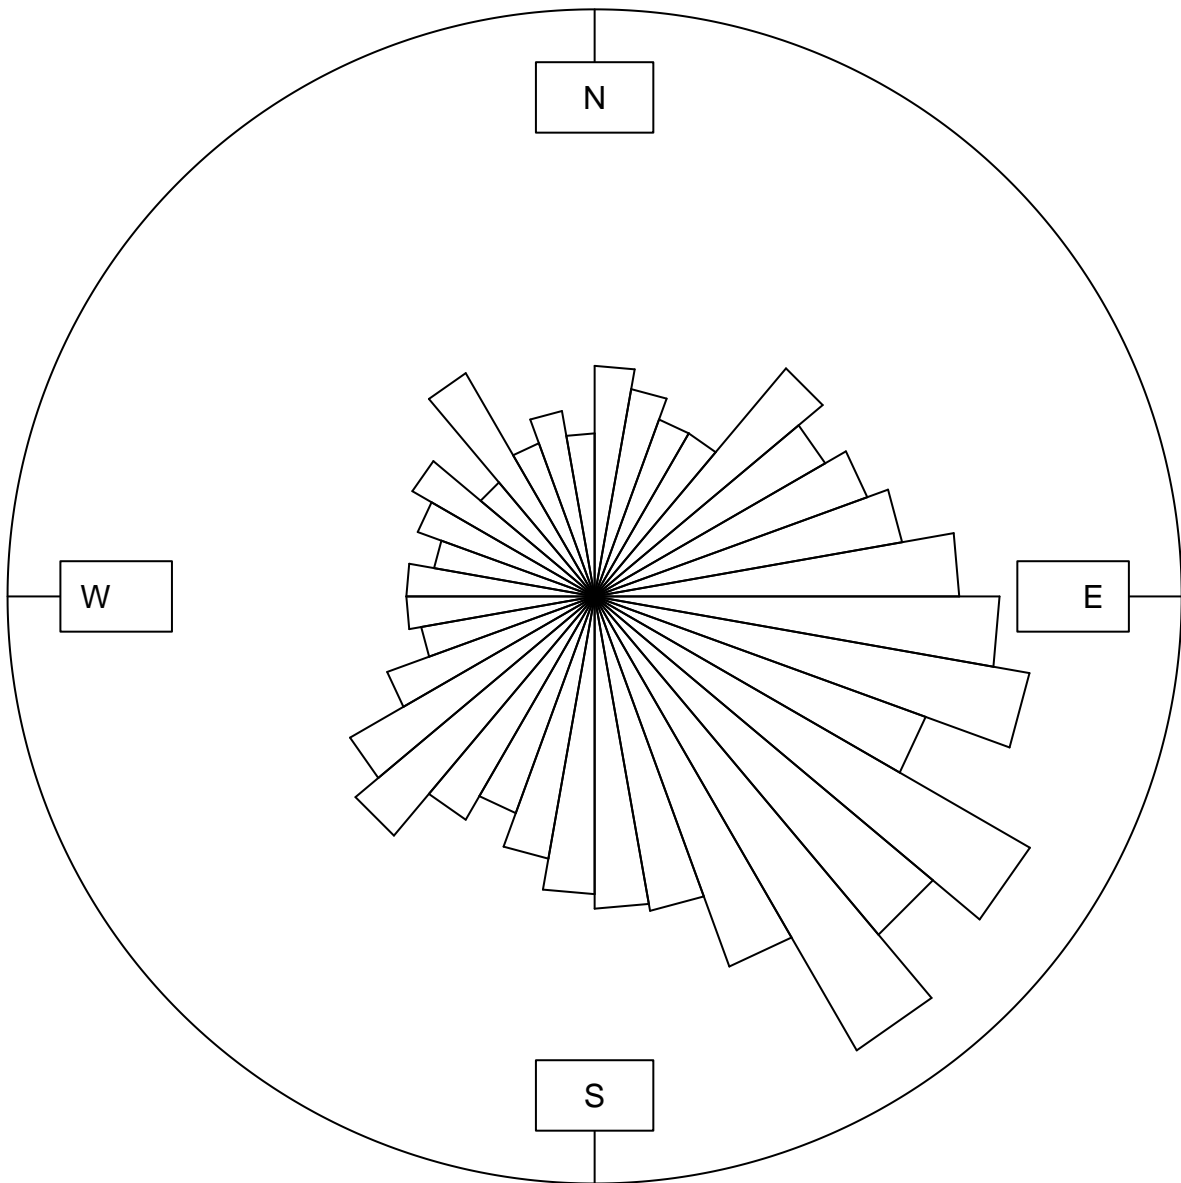

**bootstrap 499**

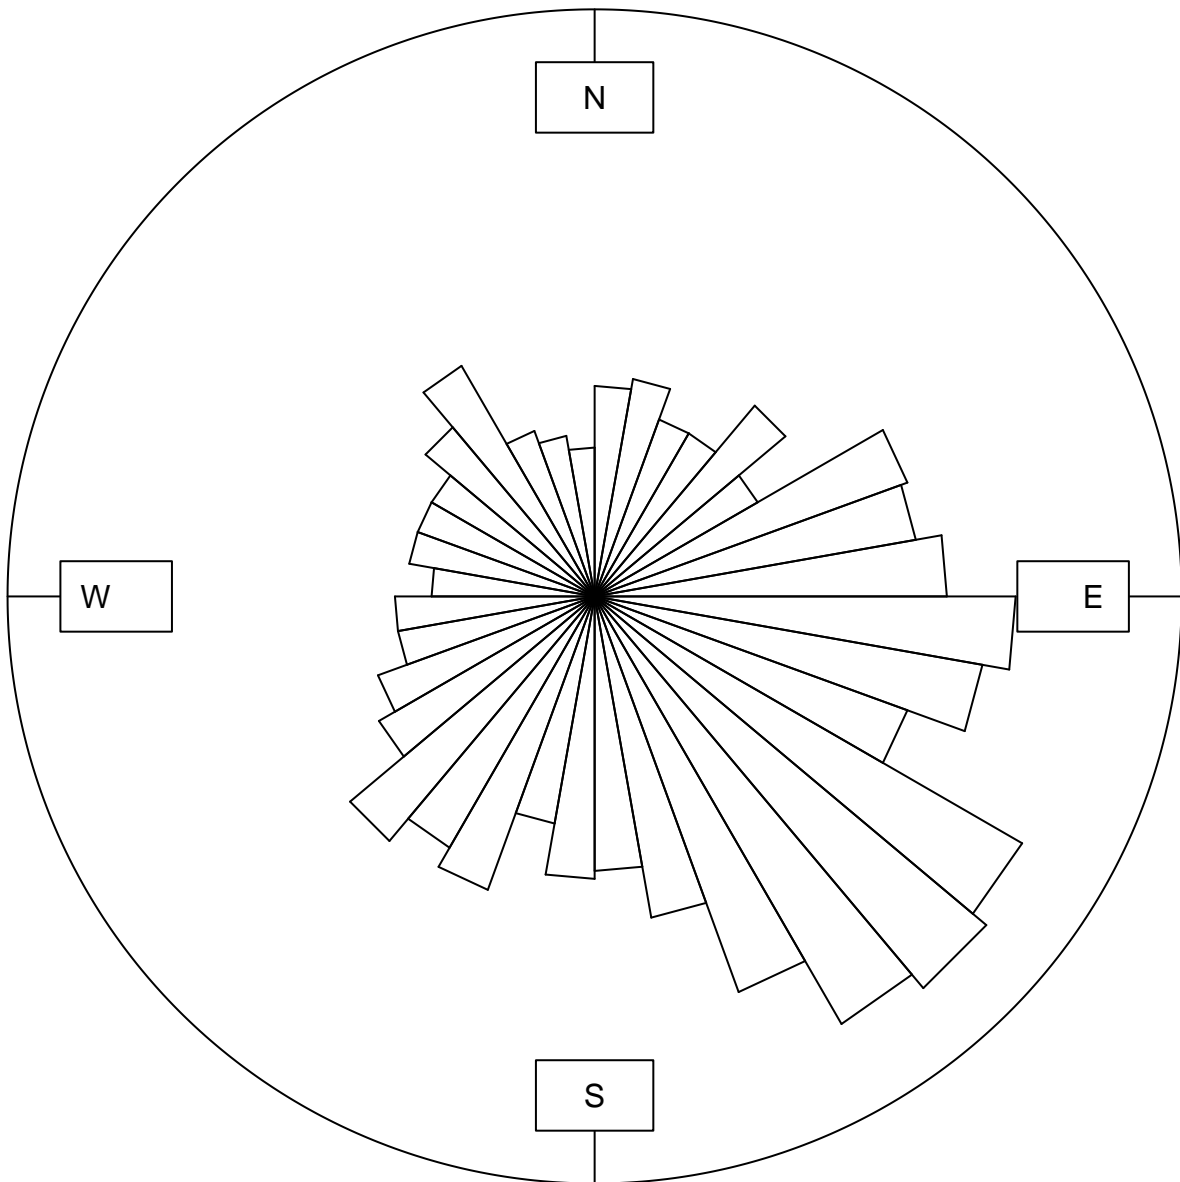

**bootstrap 500**

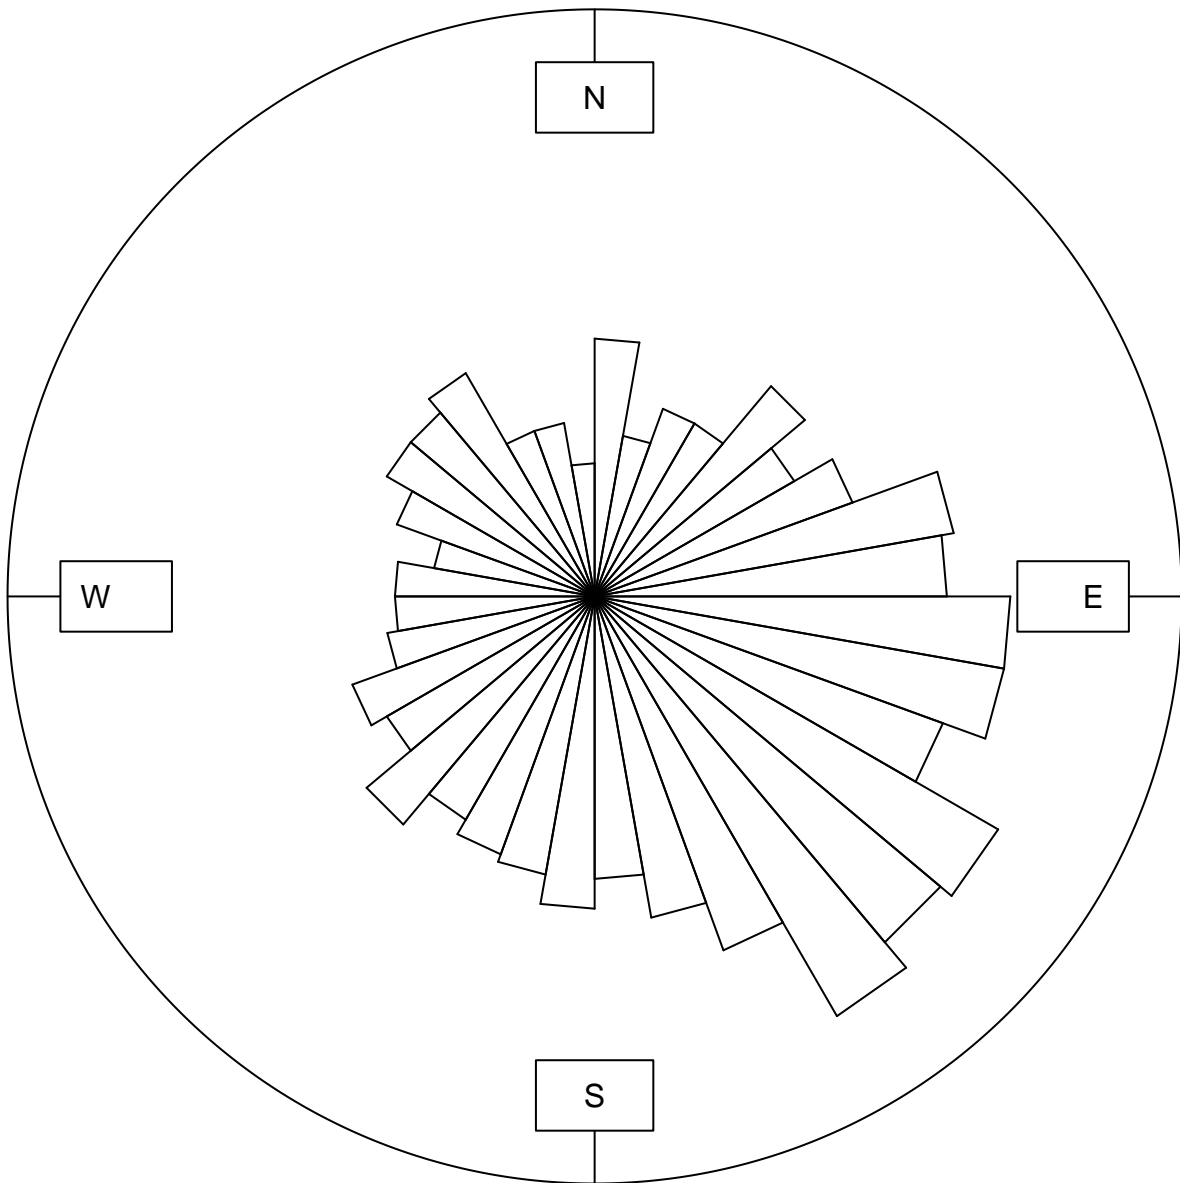

# bootstrap 501

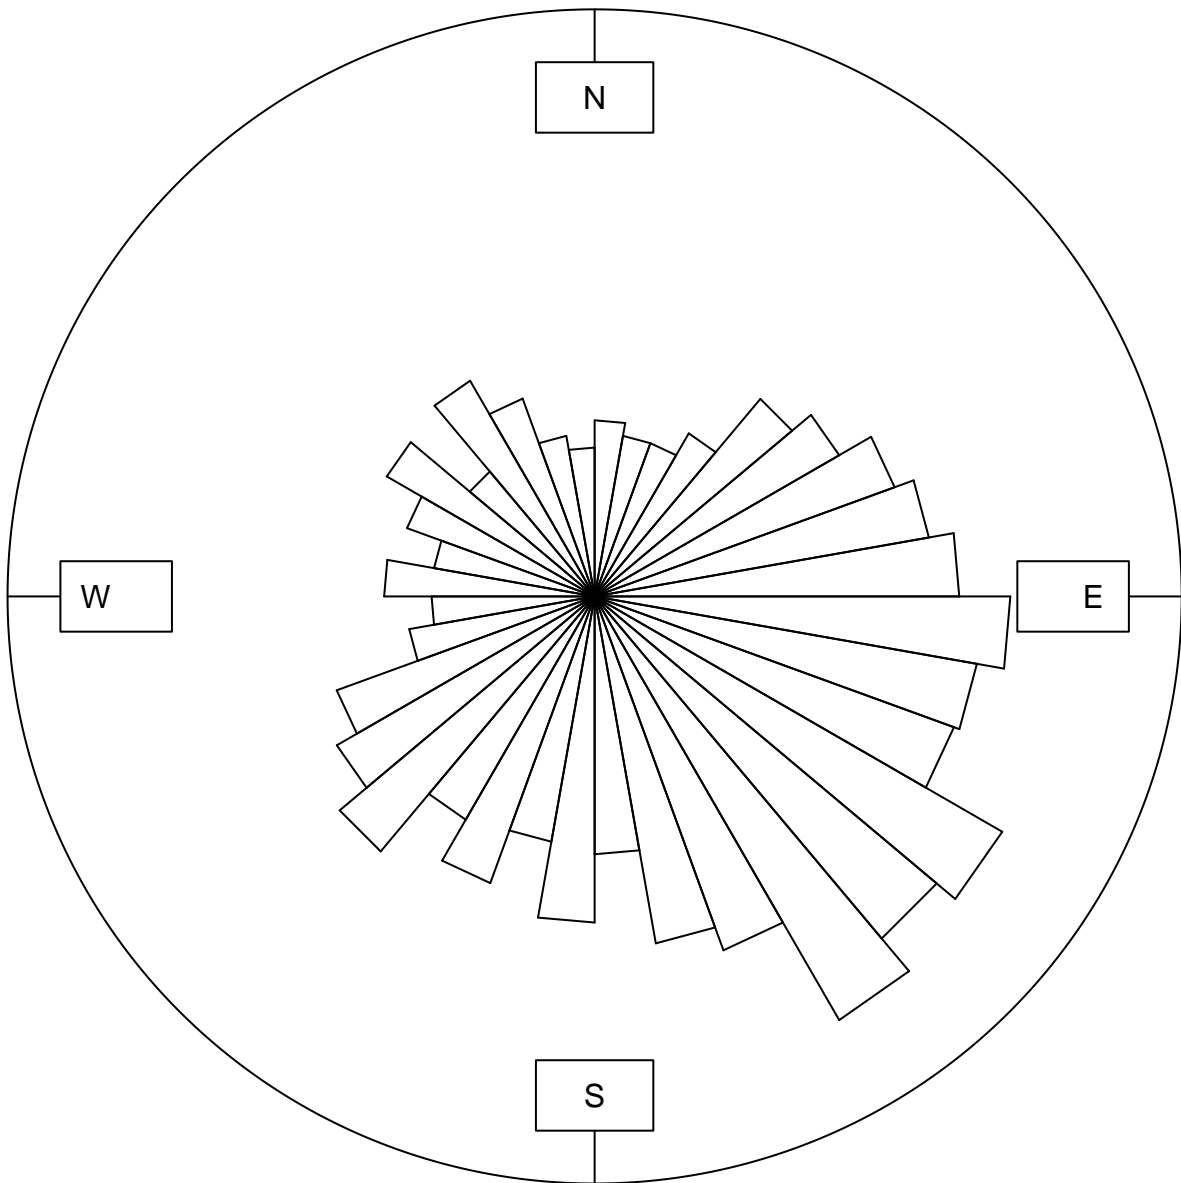

# bootstrap 502

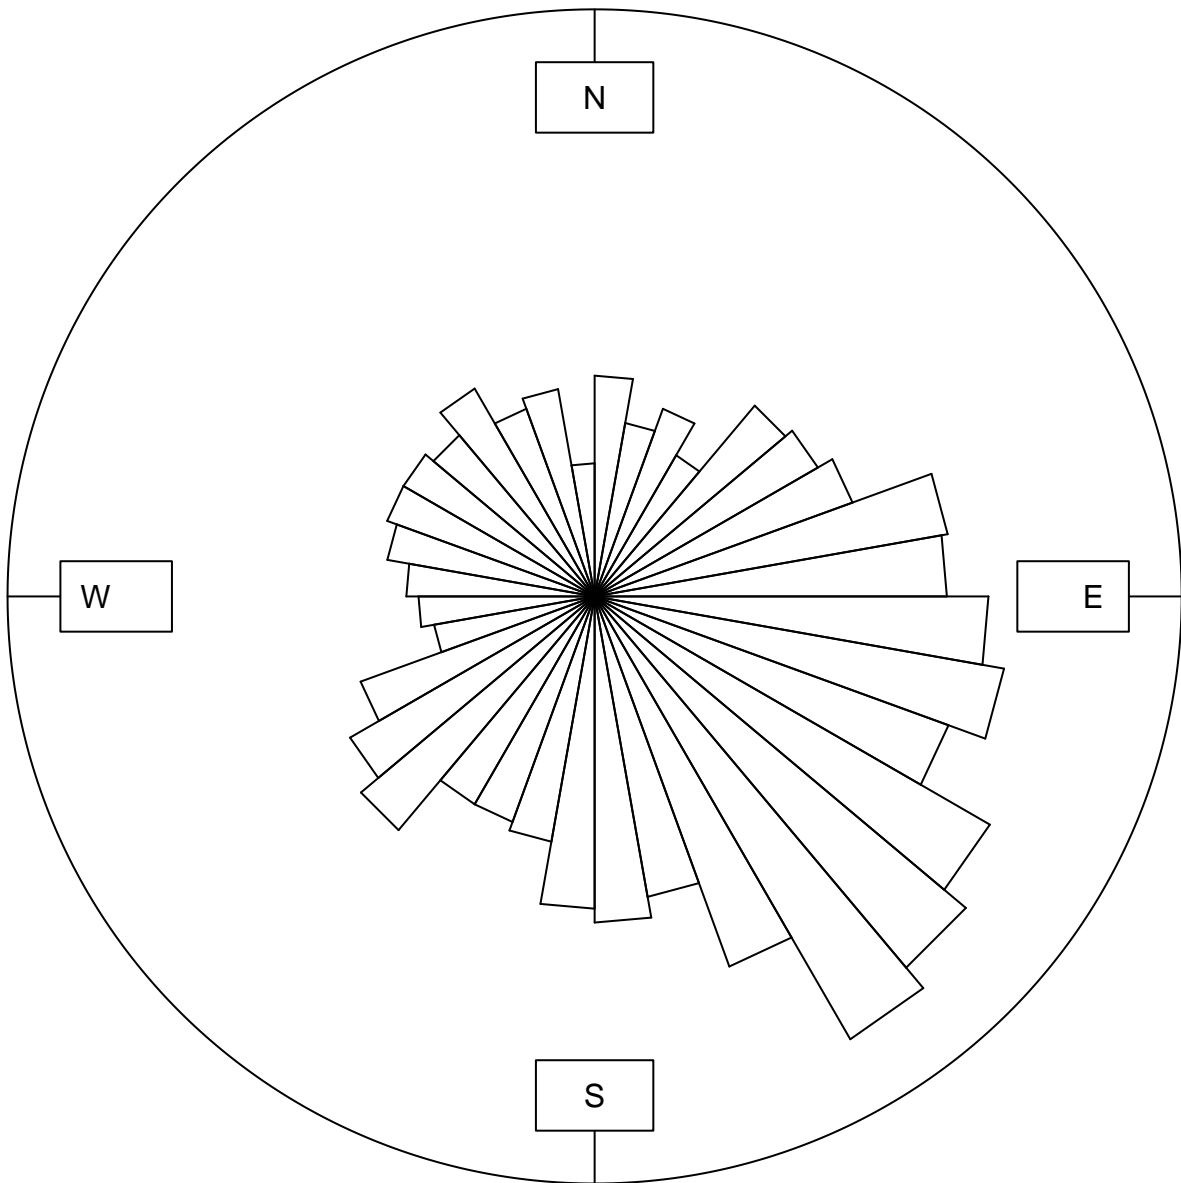

# bootstrap 503

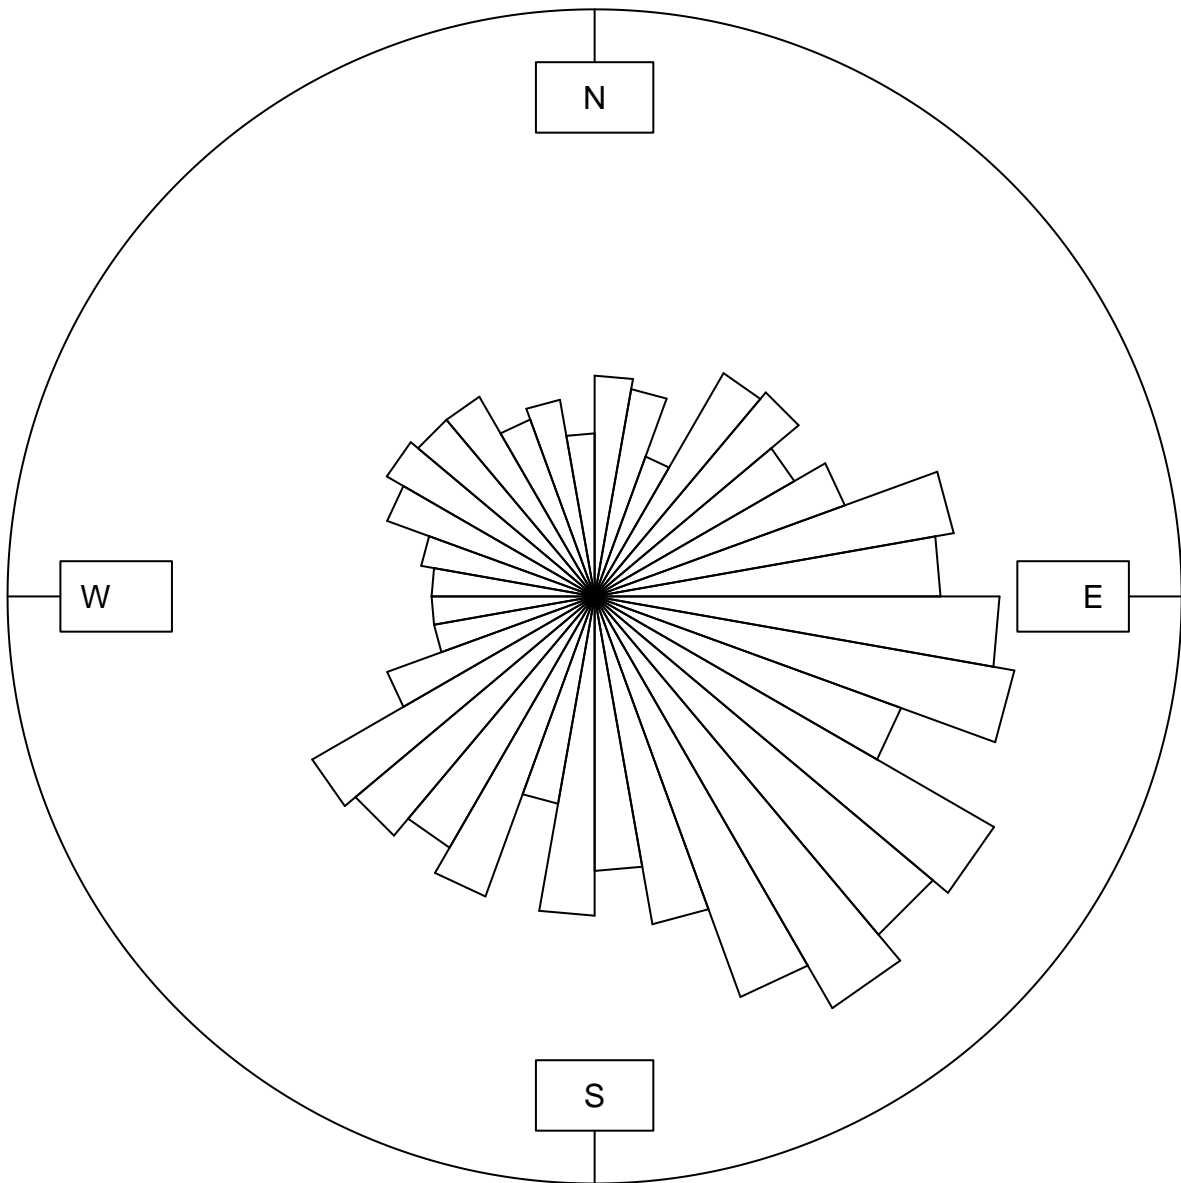

# bootstrap 504

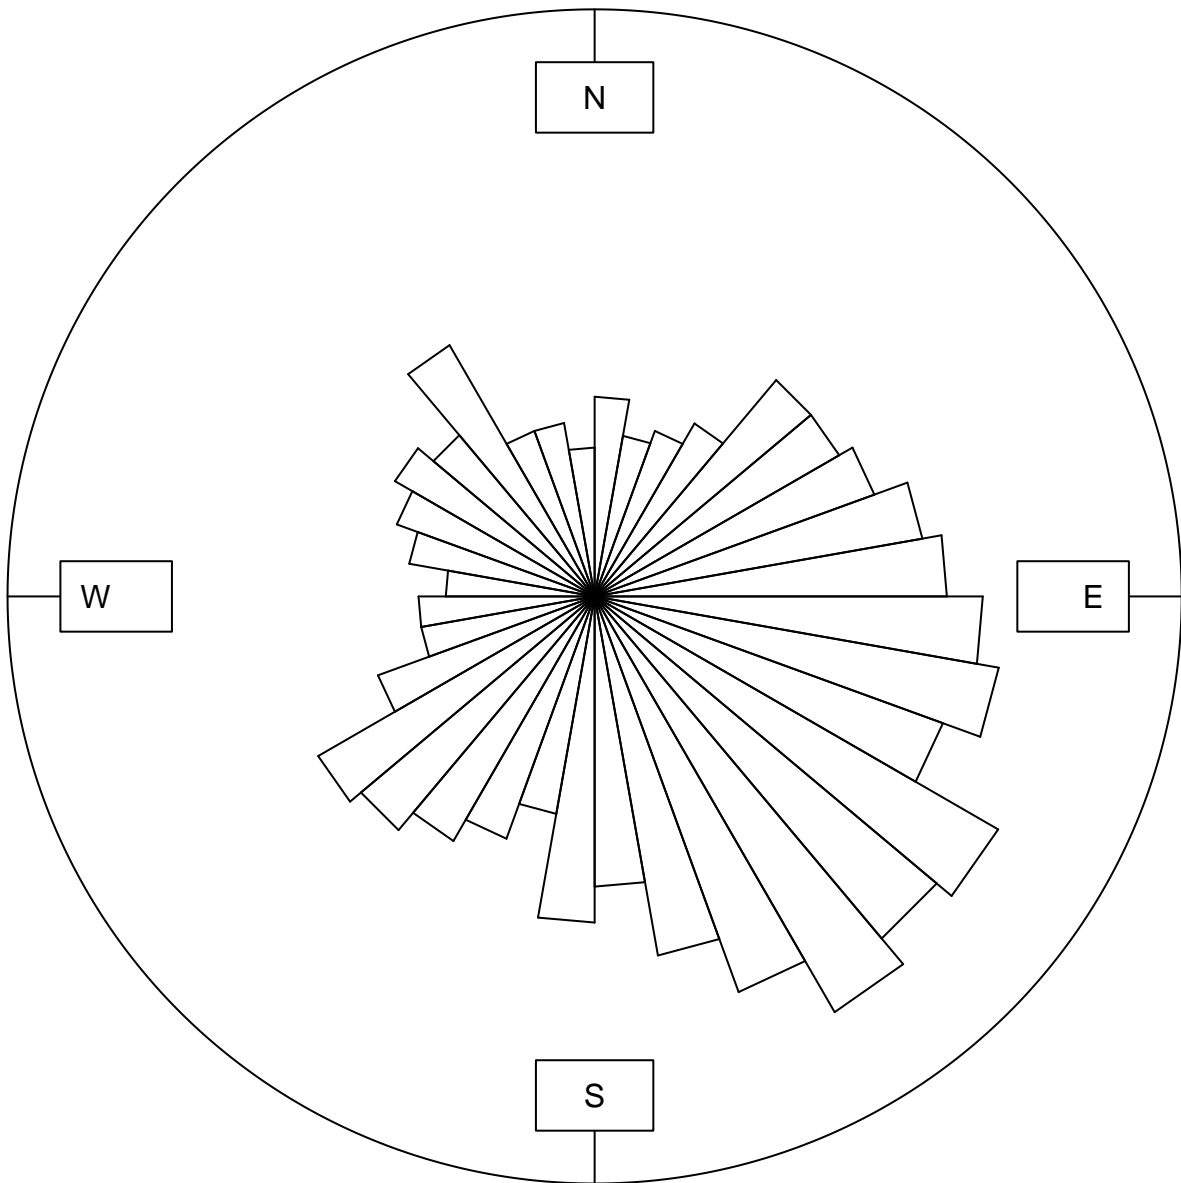



# bootstrap 505

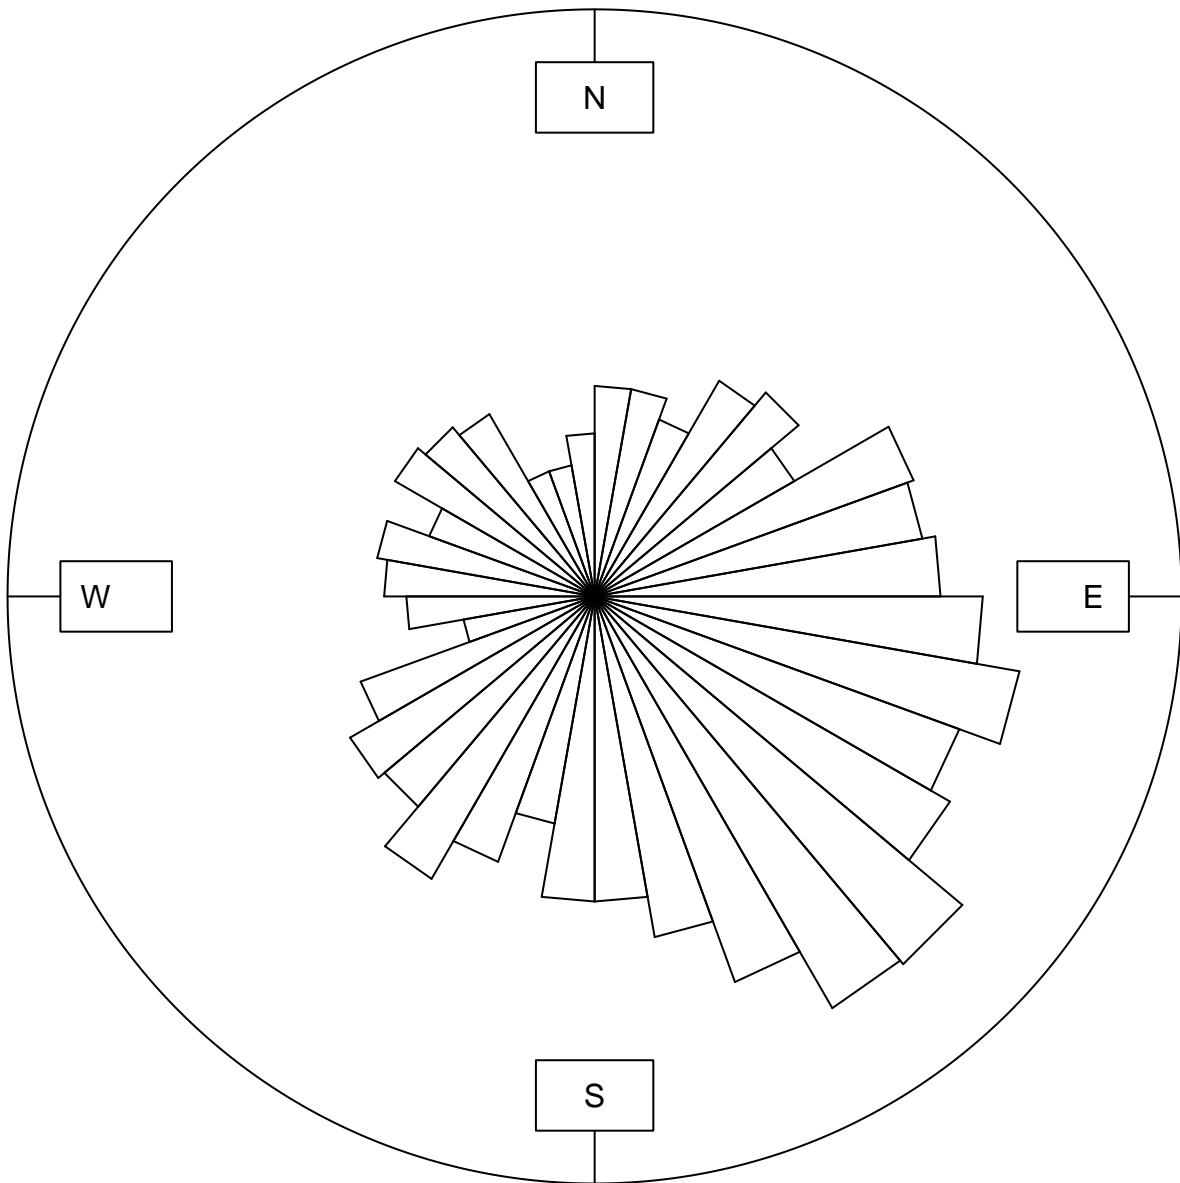

# bootstrap 506

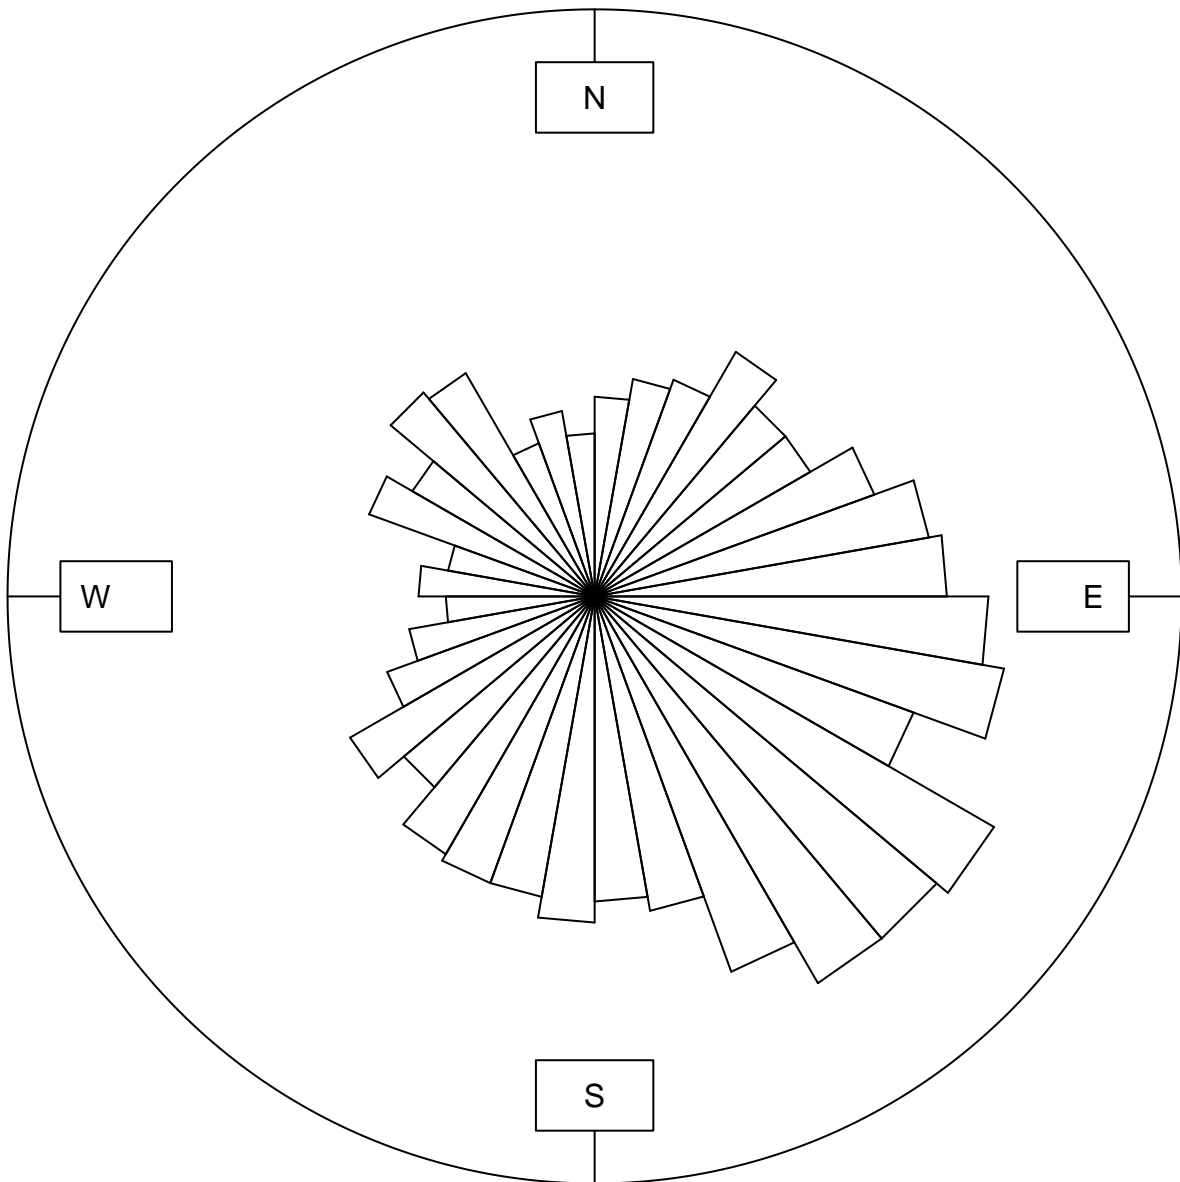

# bootstrap 507

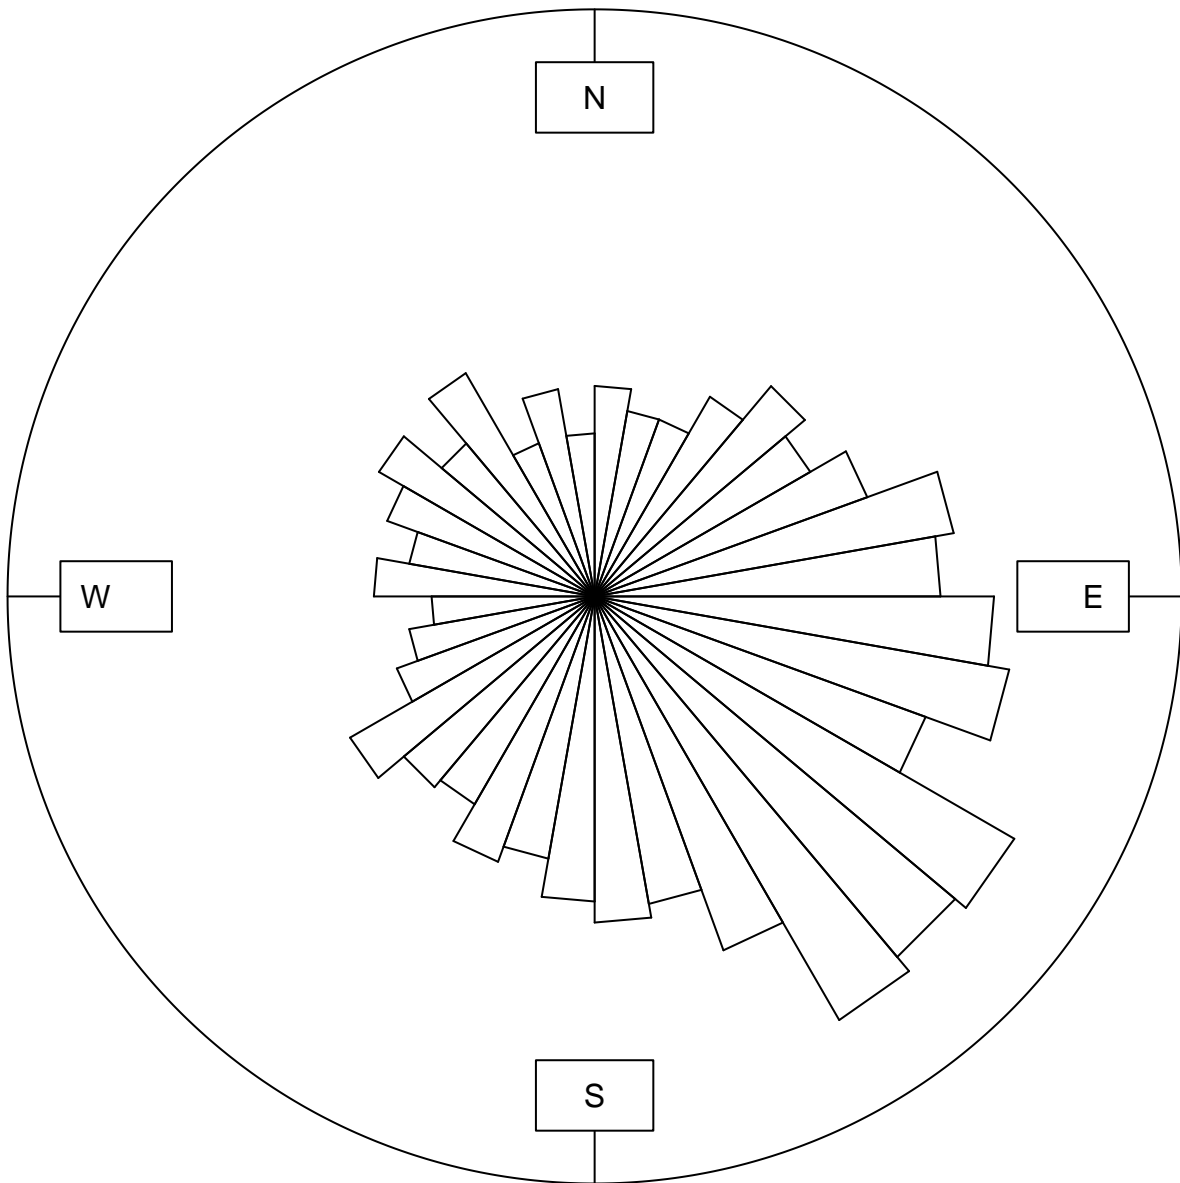

# bootstrap 508

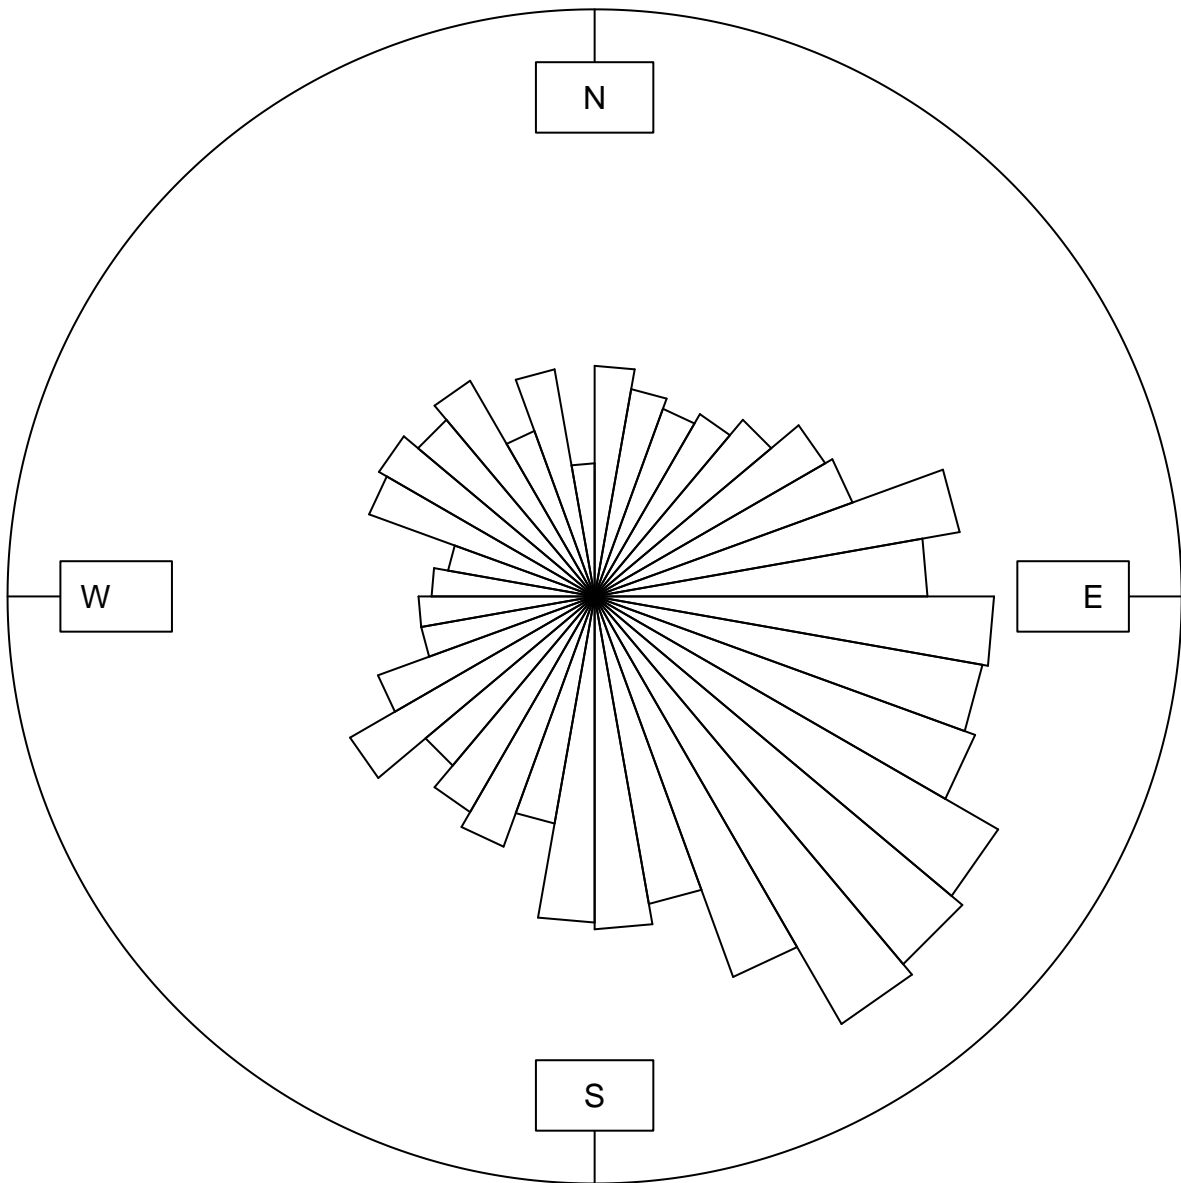

# bootstrap 509

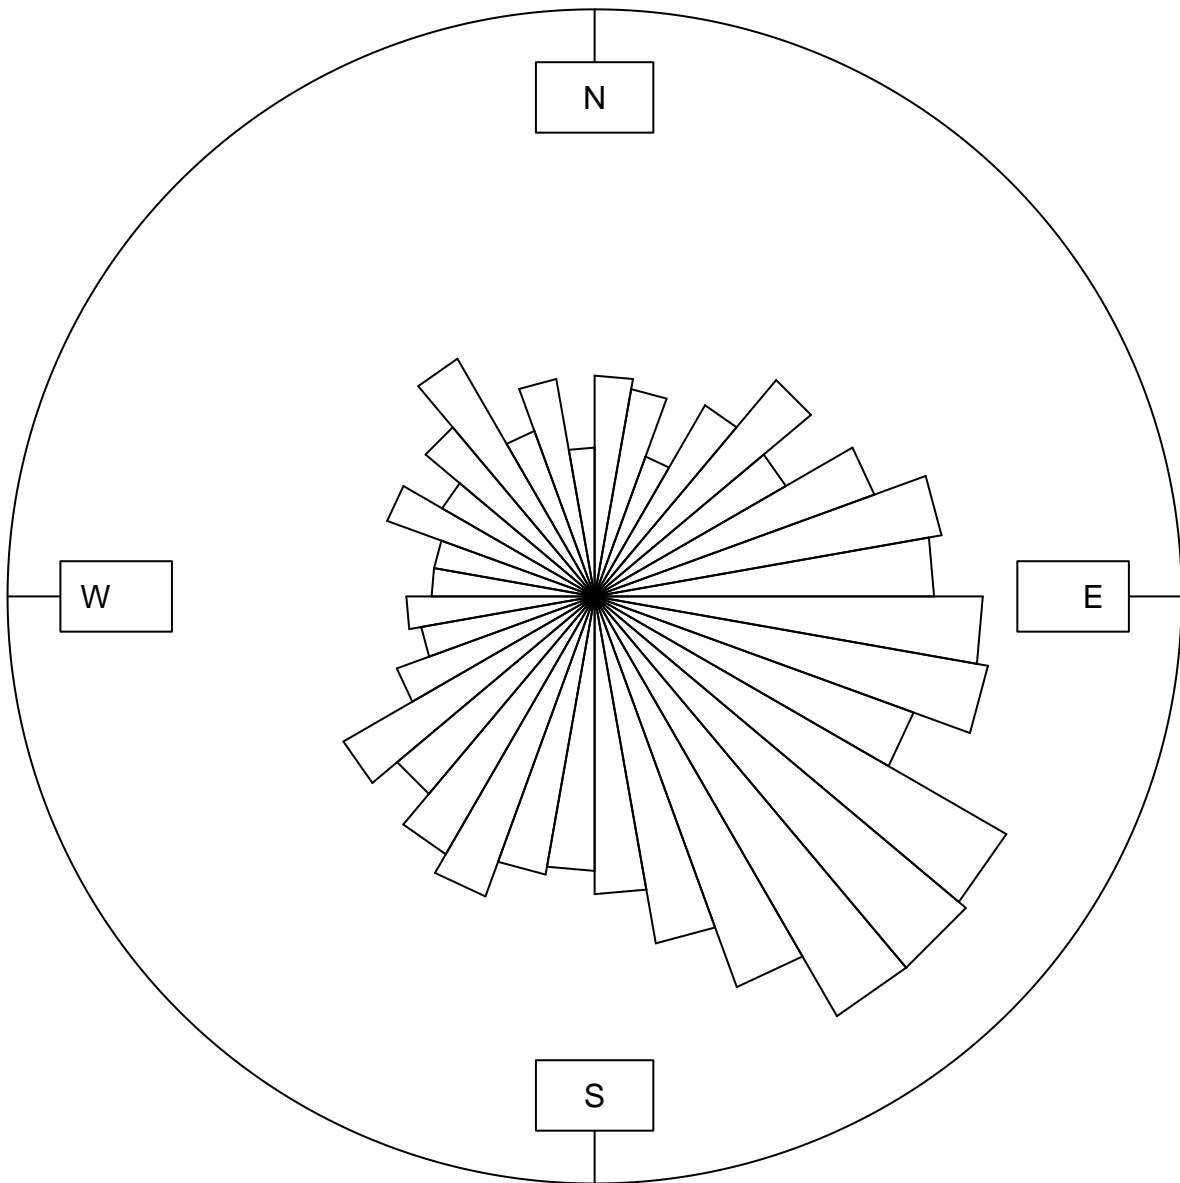

# bootstrap 510

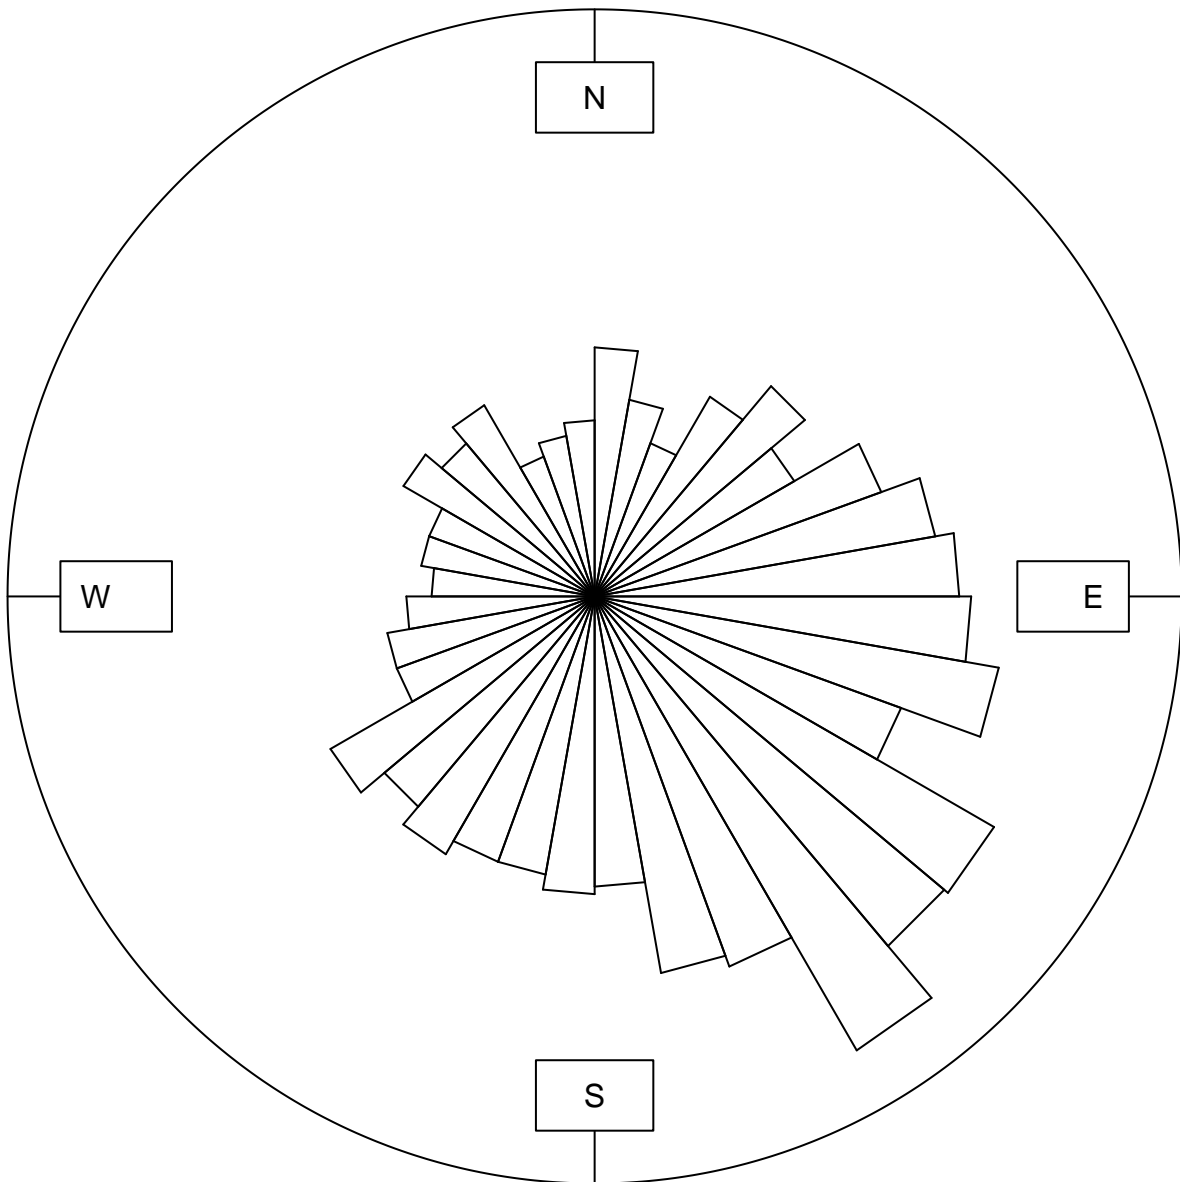

# bootstrap 511

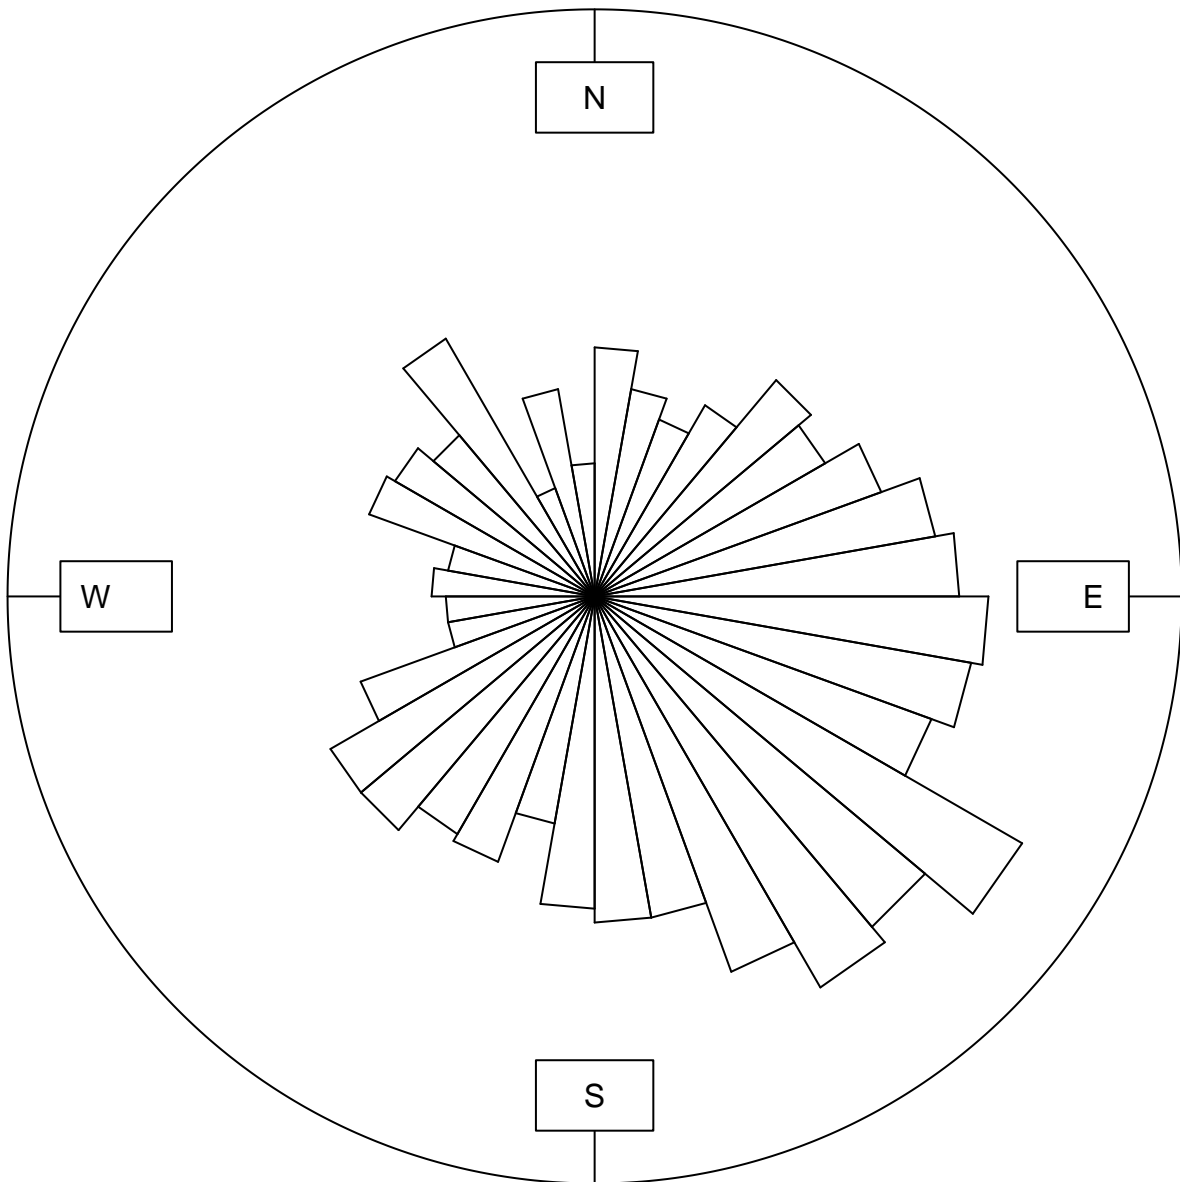

# bootstrap 512

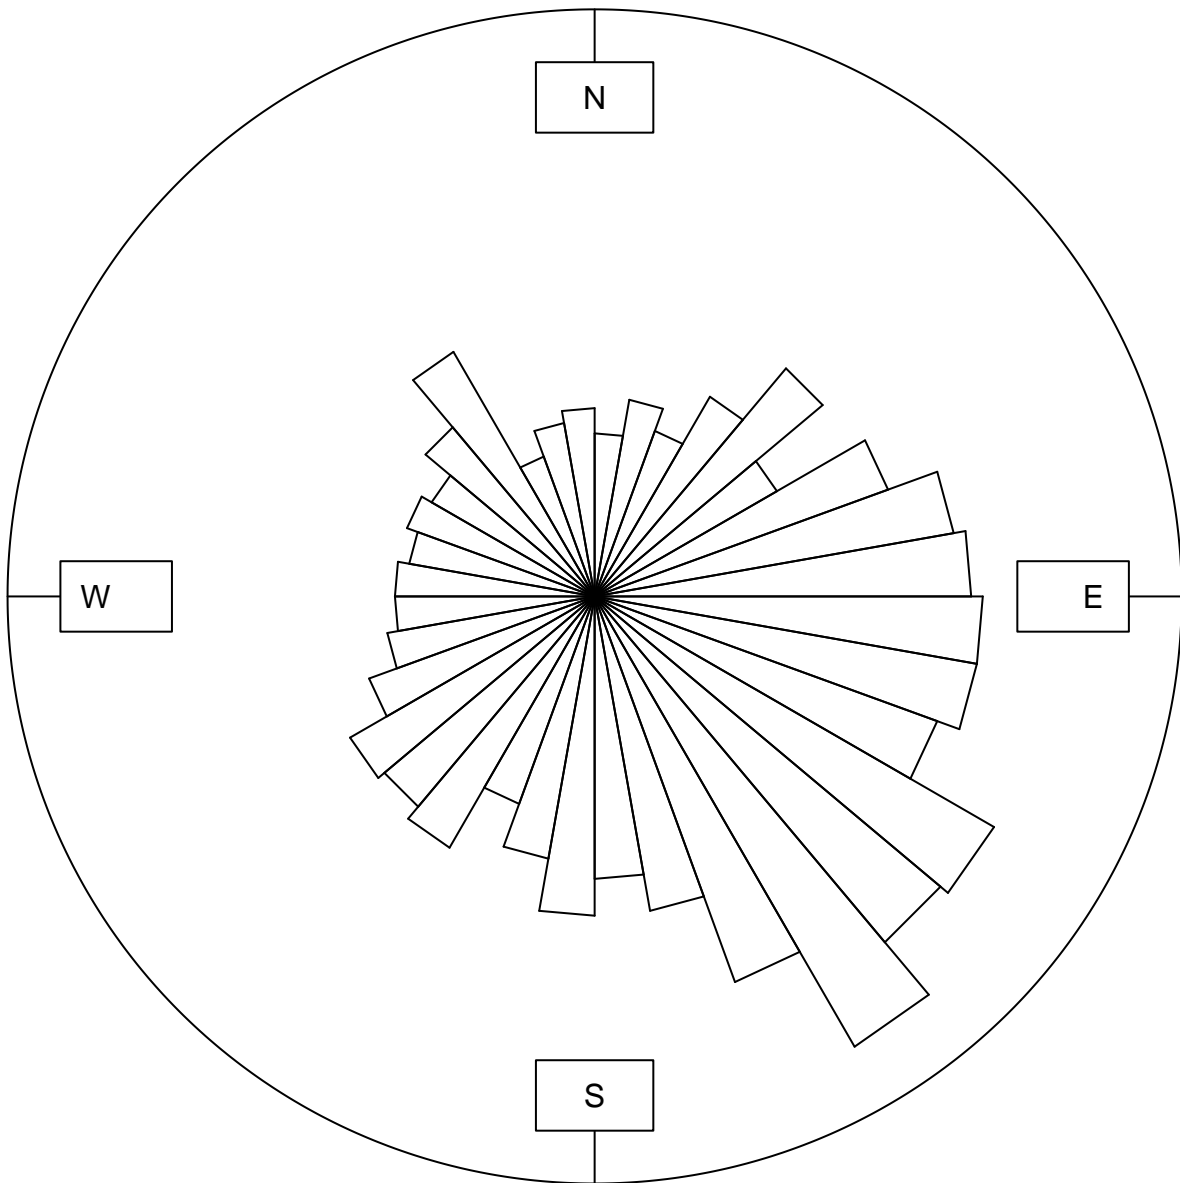



# bootstrap 513

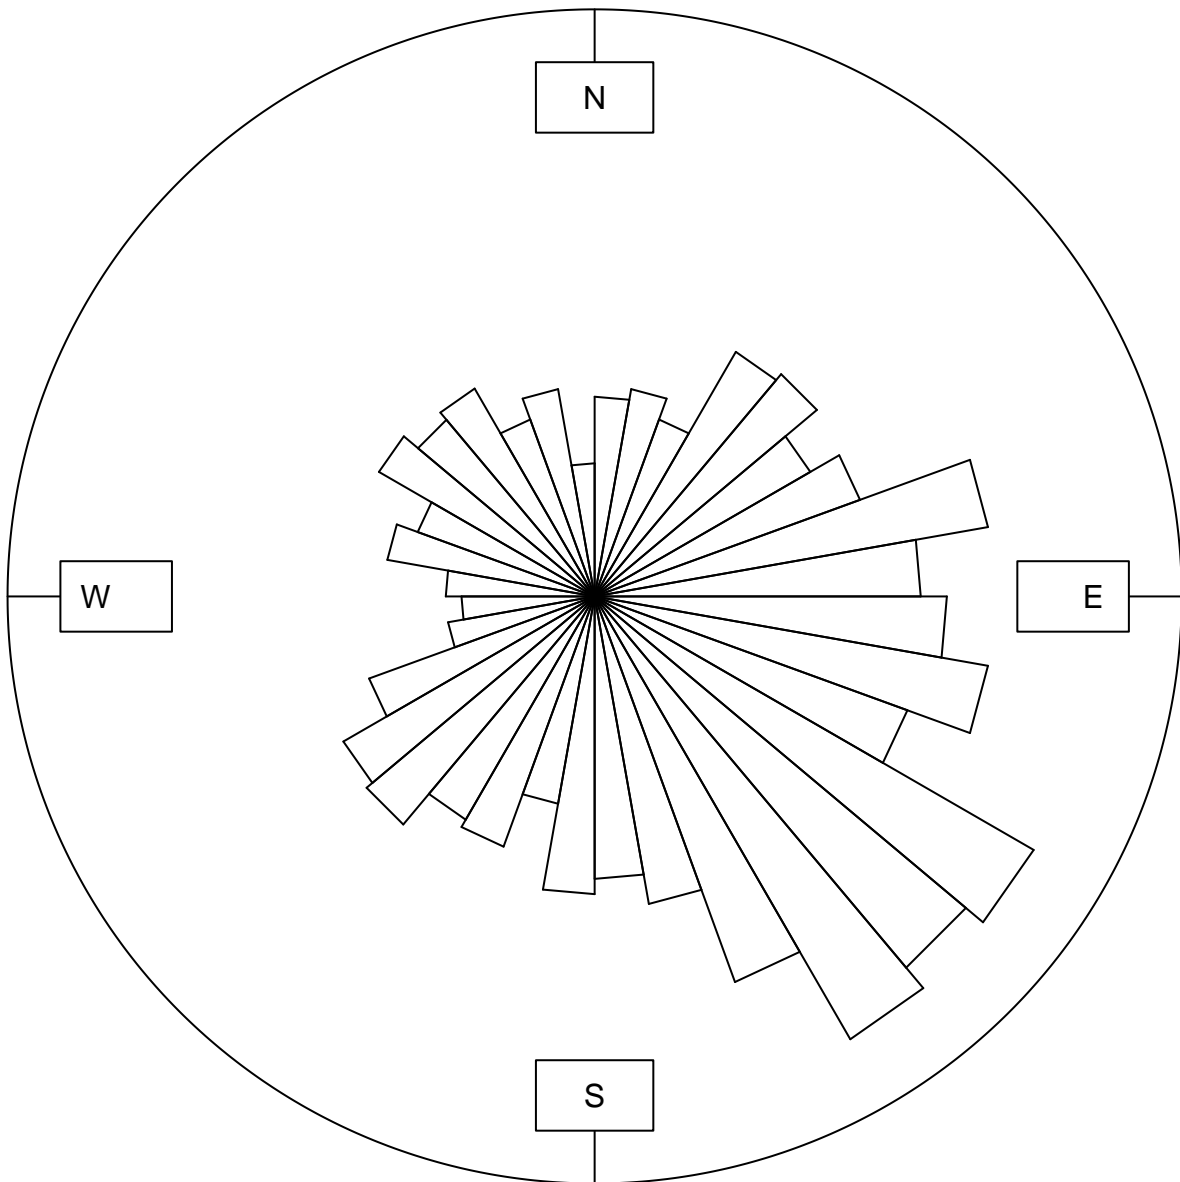

# bootstrap 514

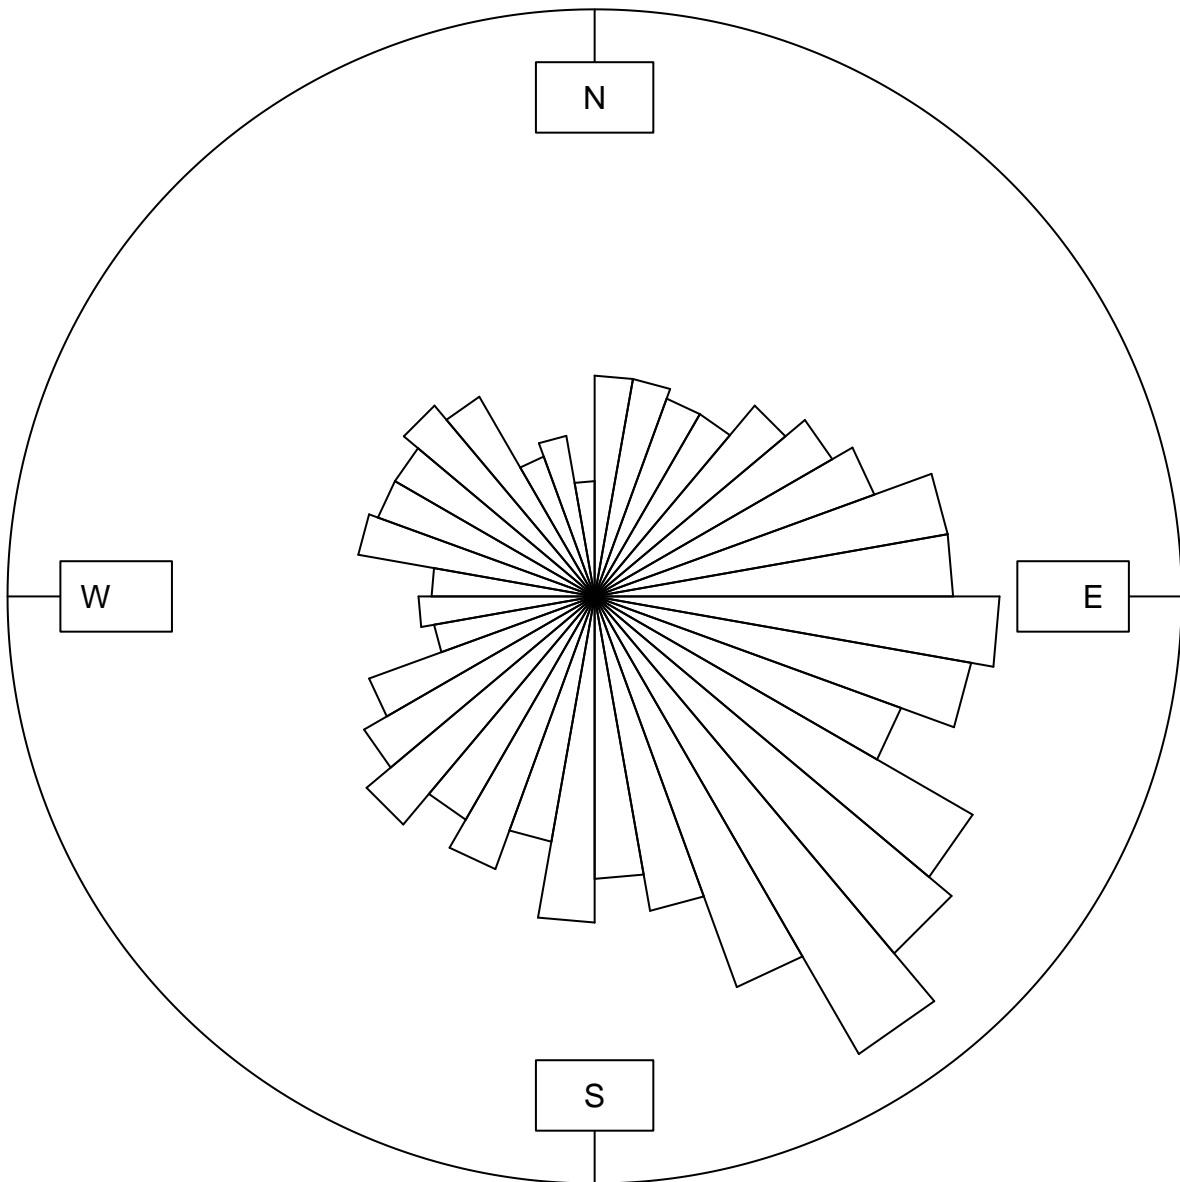

# bootstrap 515

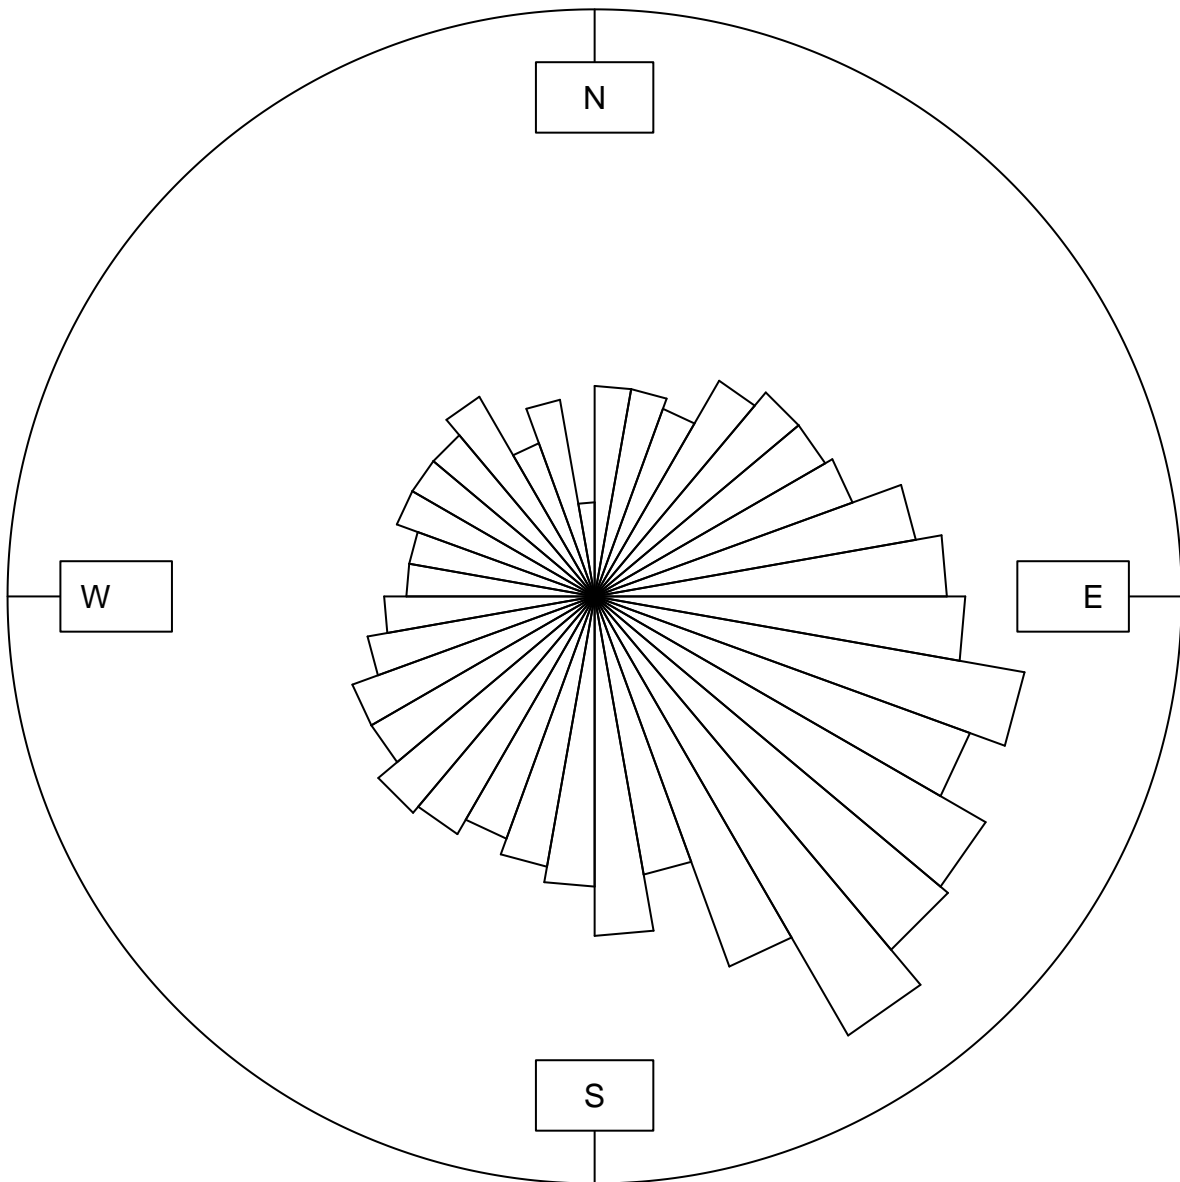

# bootstrap 516

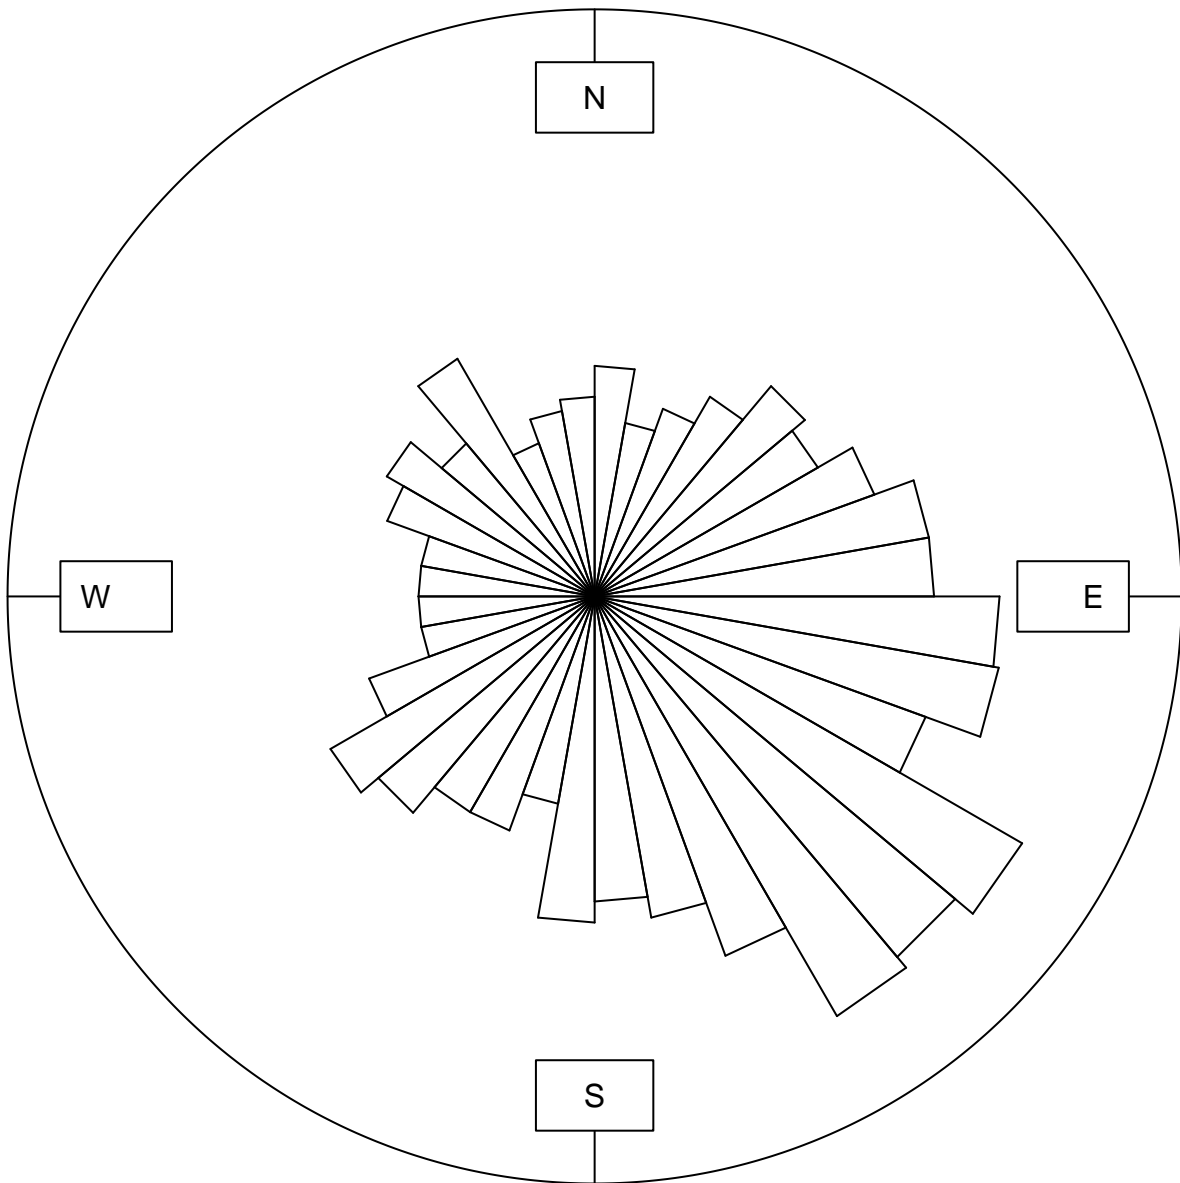

# bootstrap 517

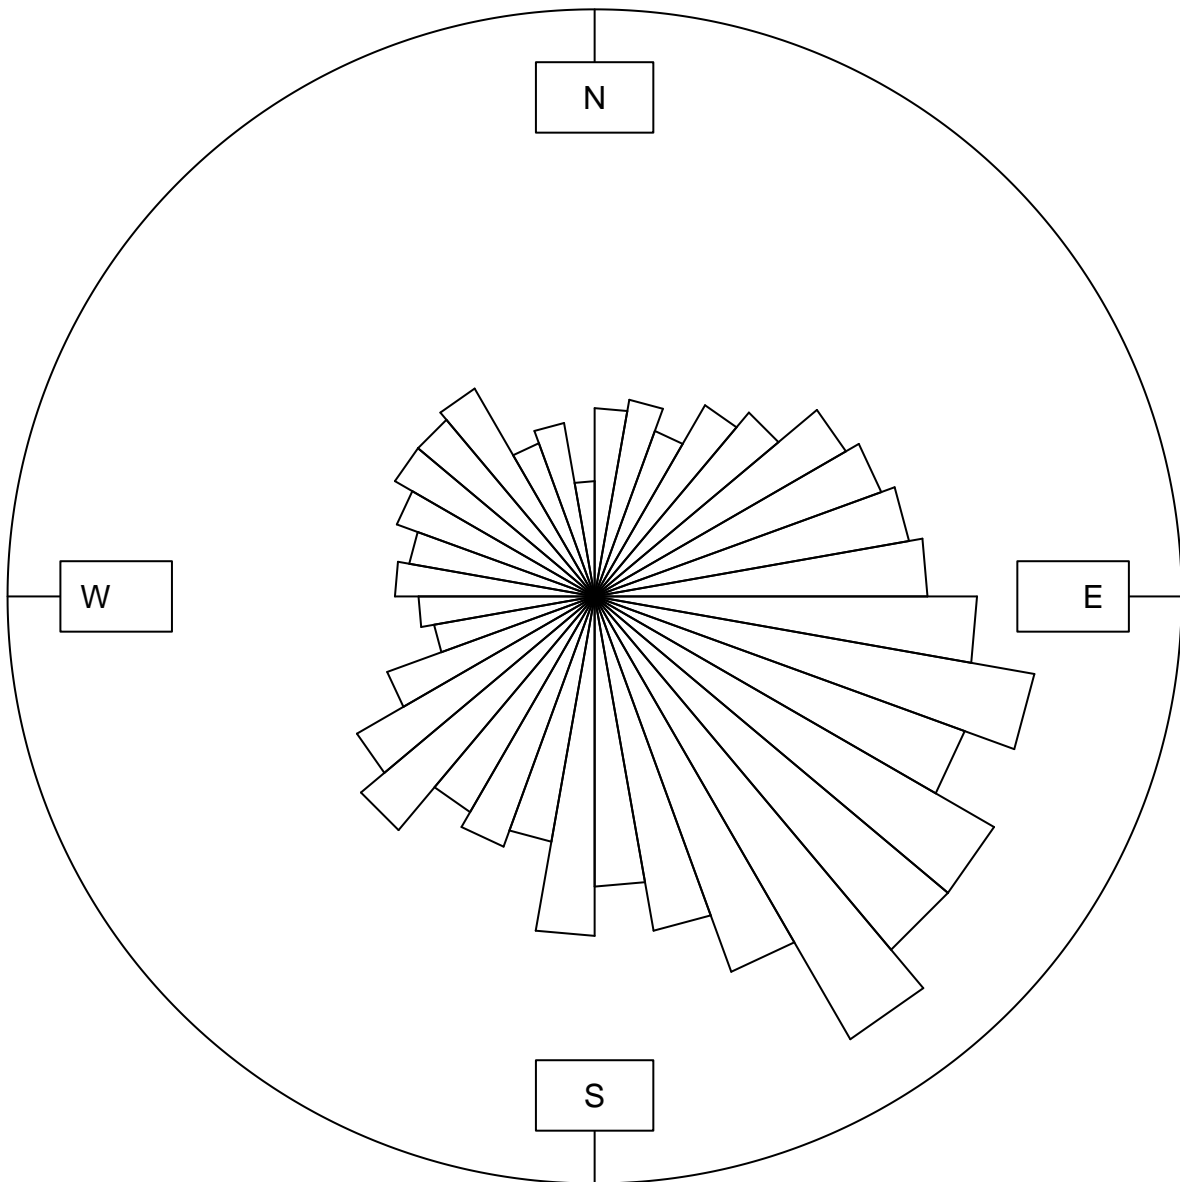

# bootstrap 518

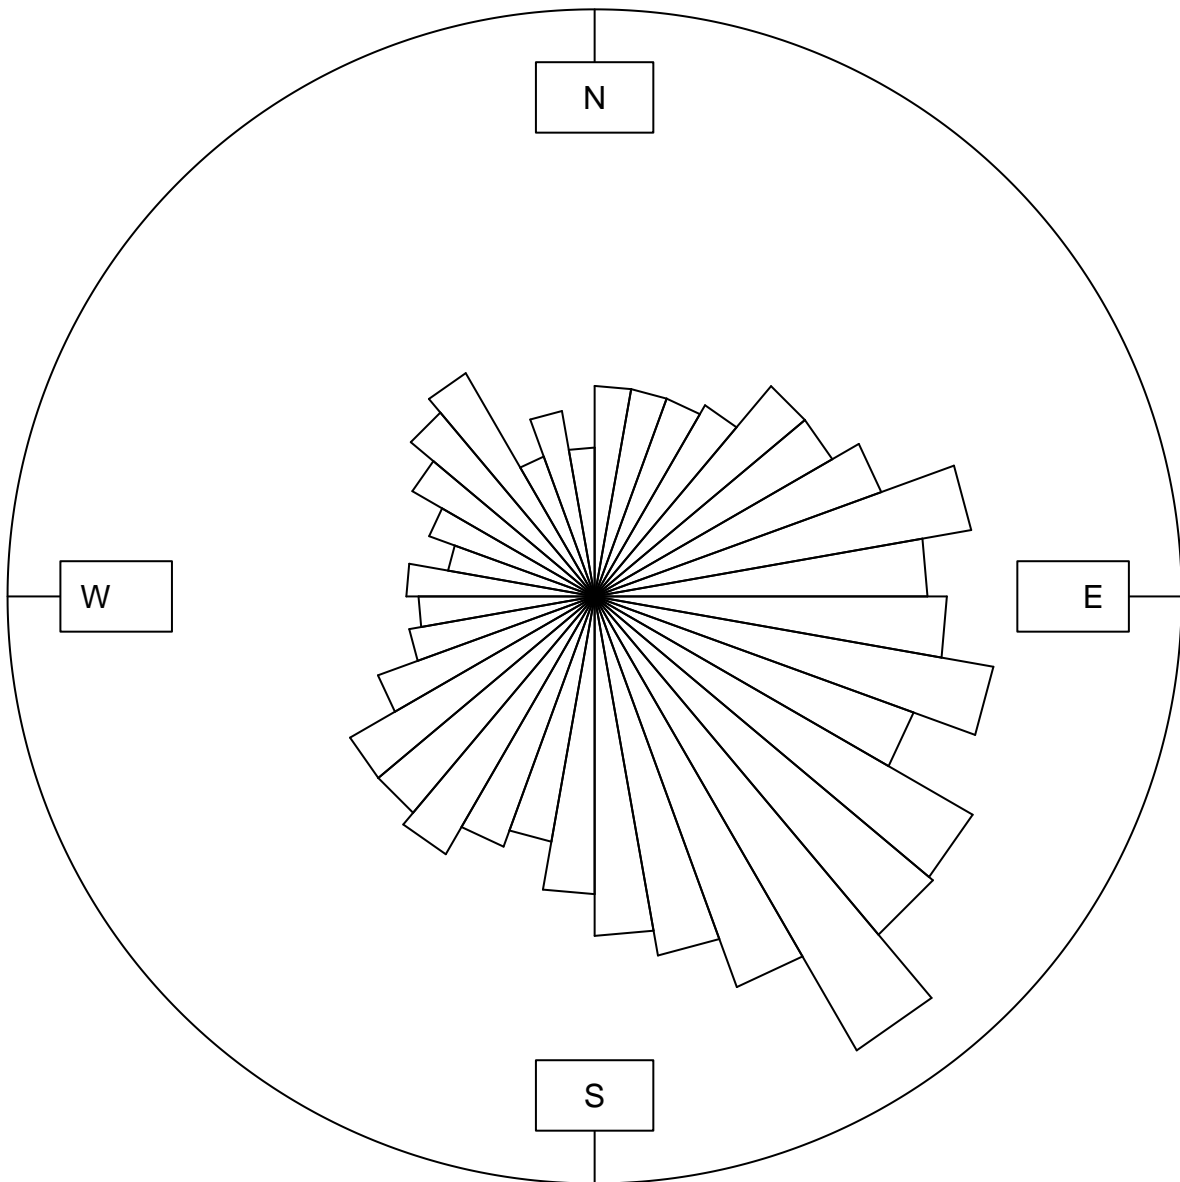

# bootstrap 519

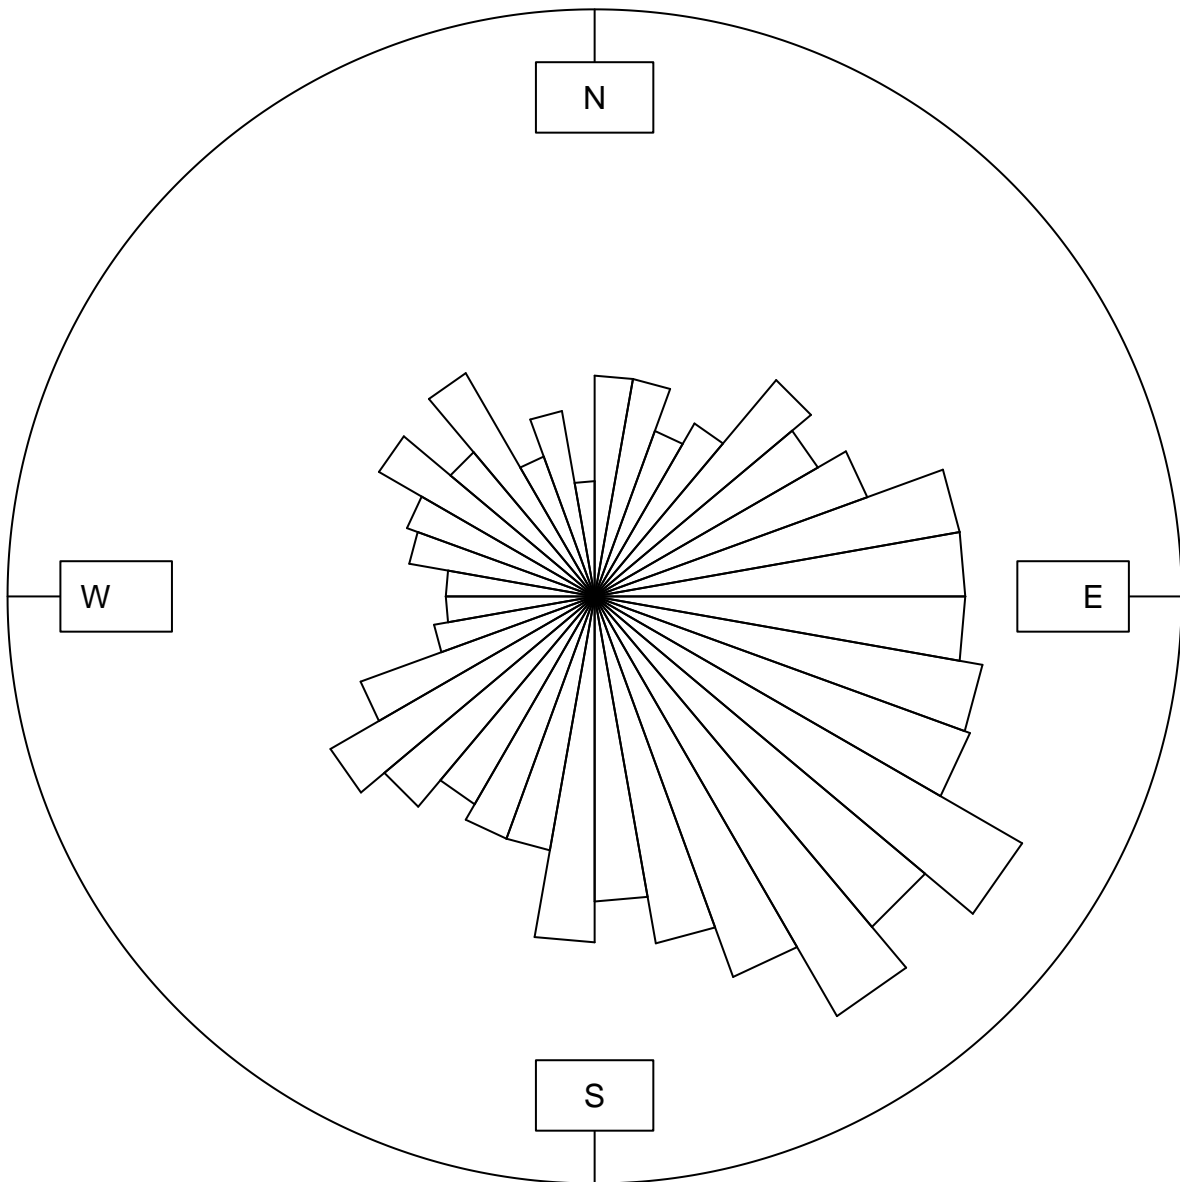

# bootstrap 520

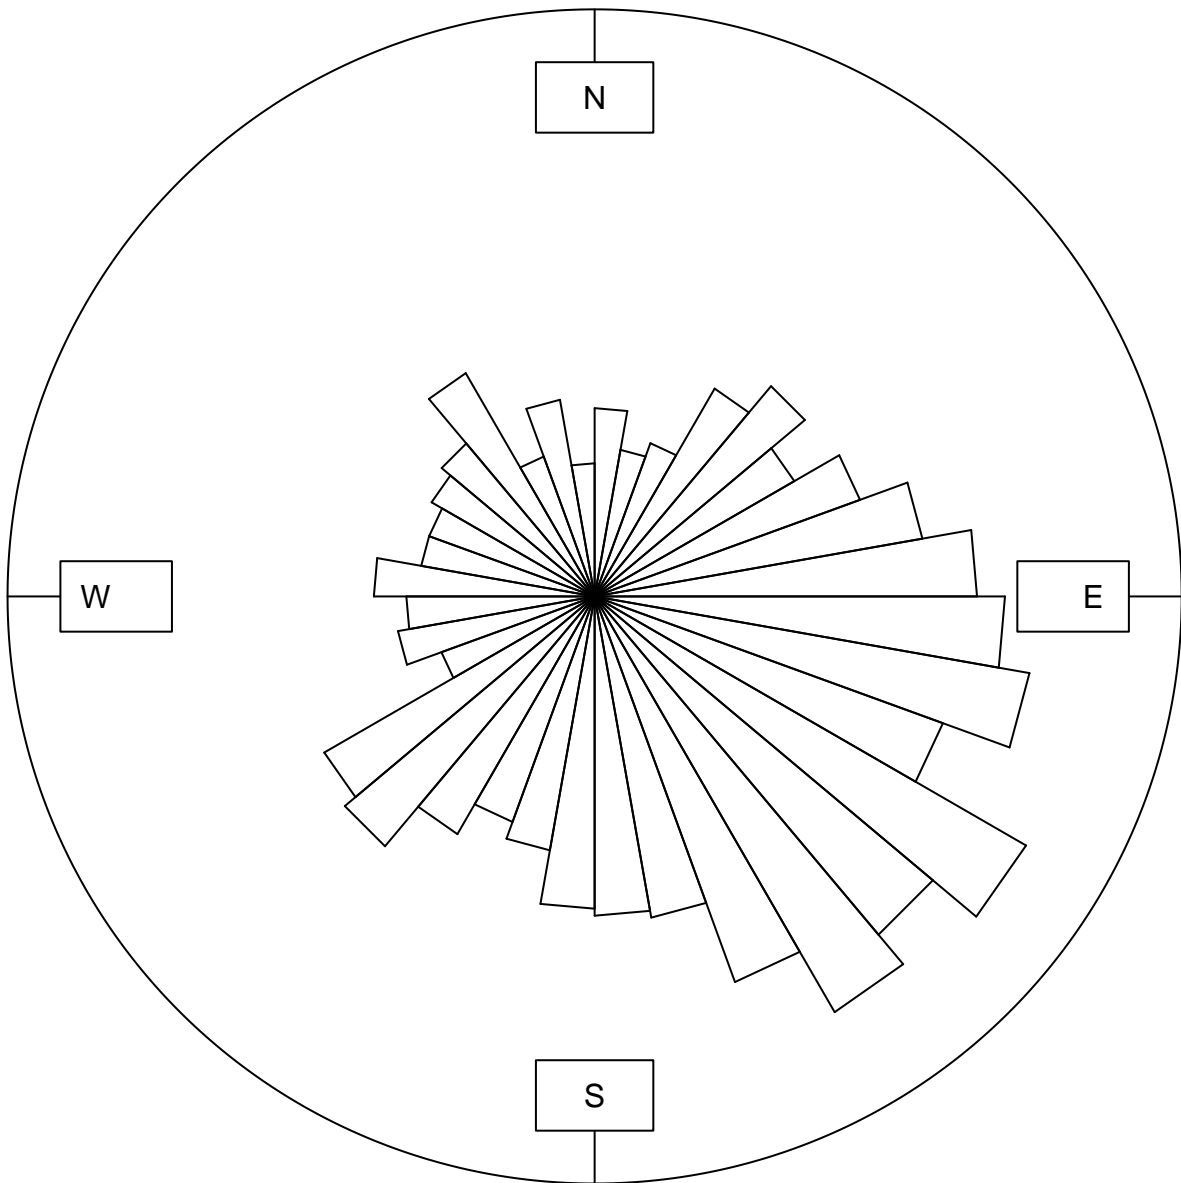



# bootstrap 521

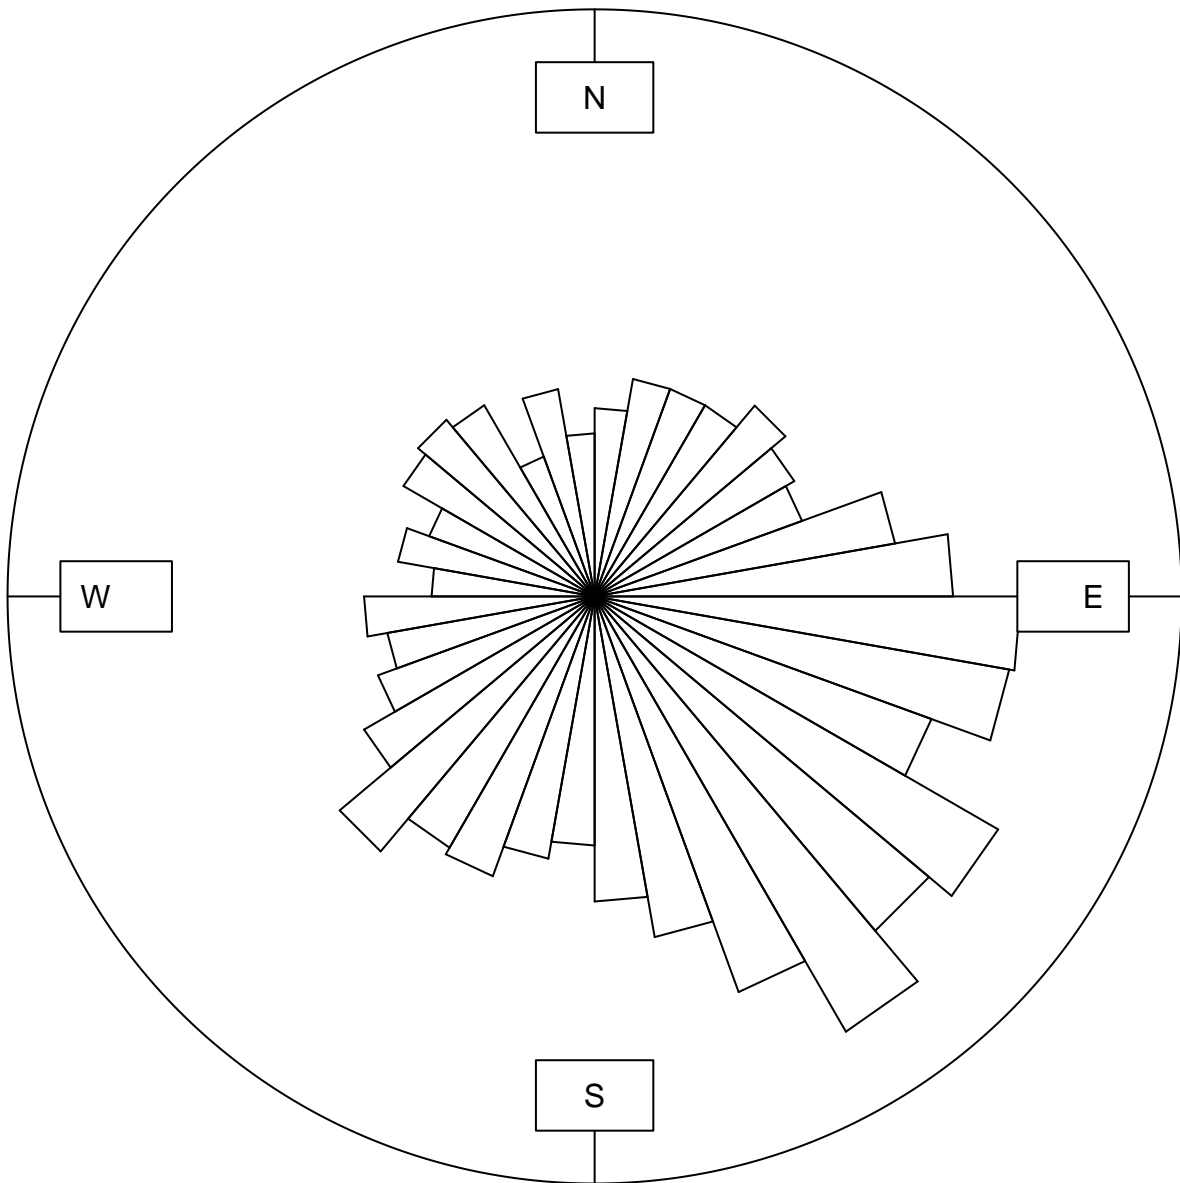

# bootstrap 522

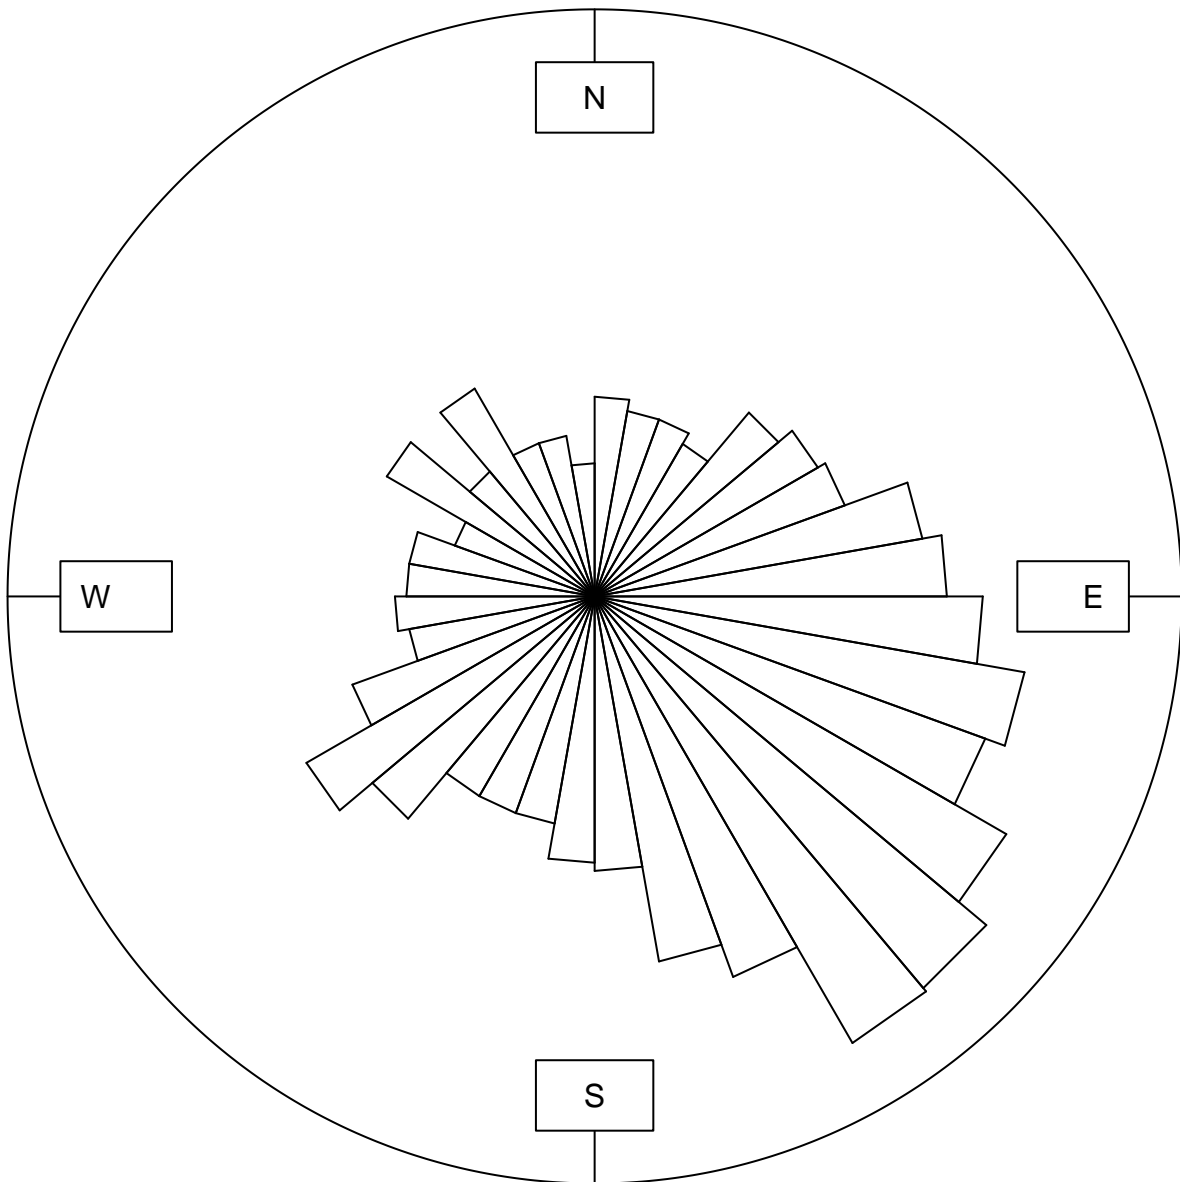

# bootstrap 523

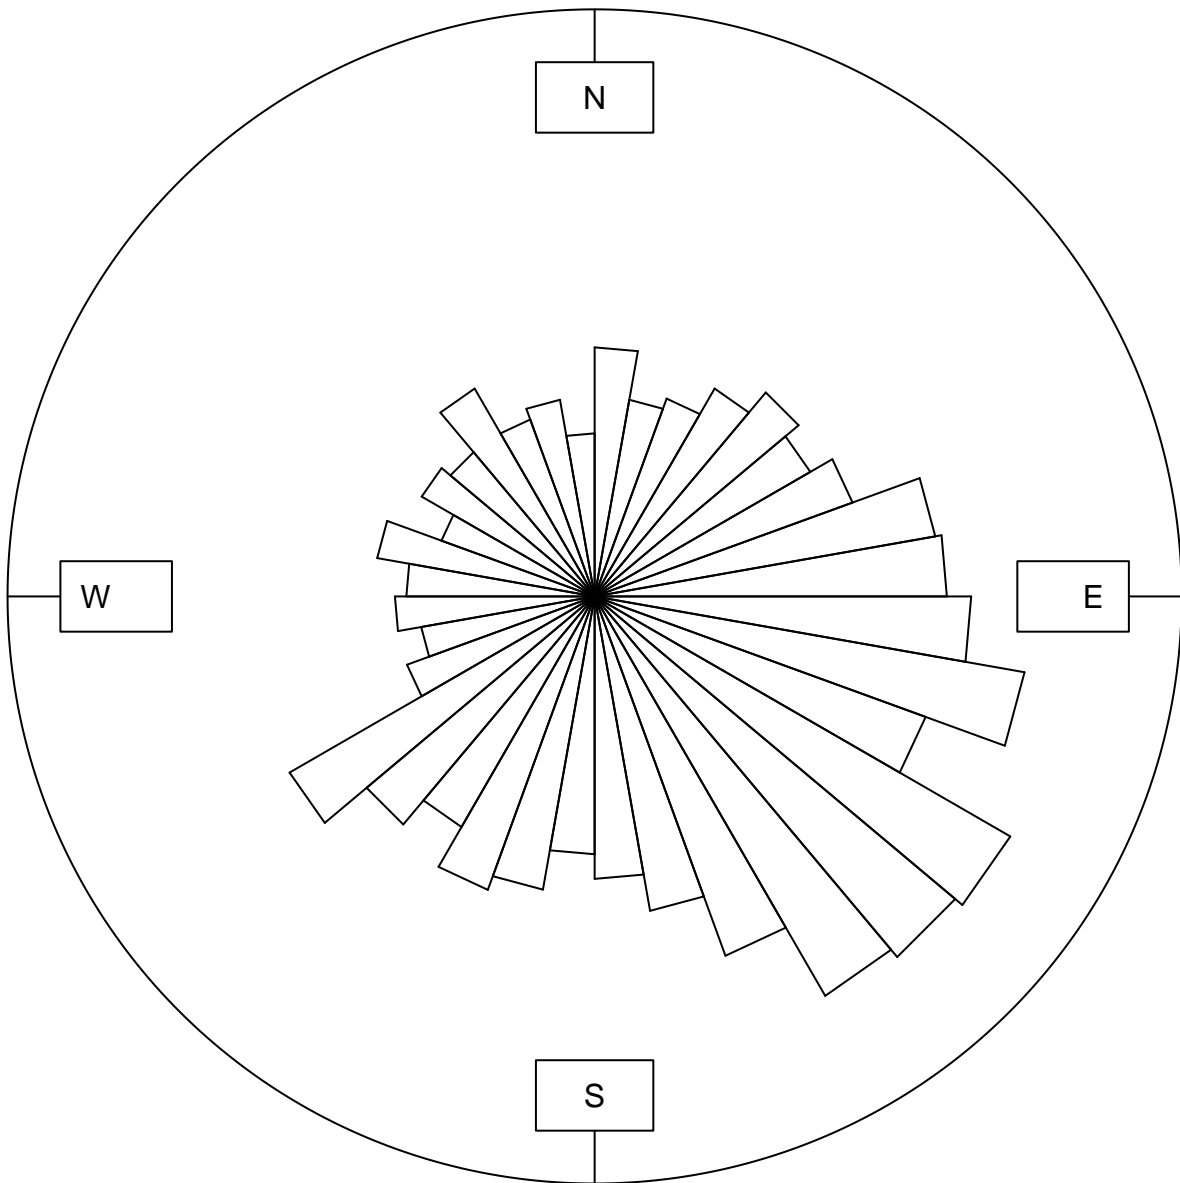

# bootstrap 524

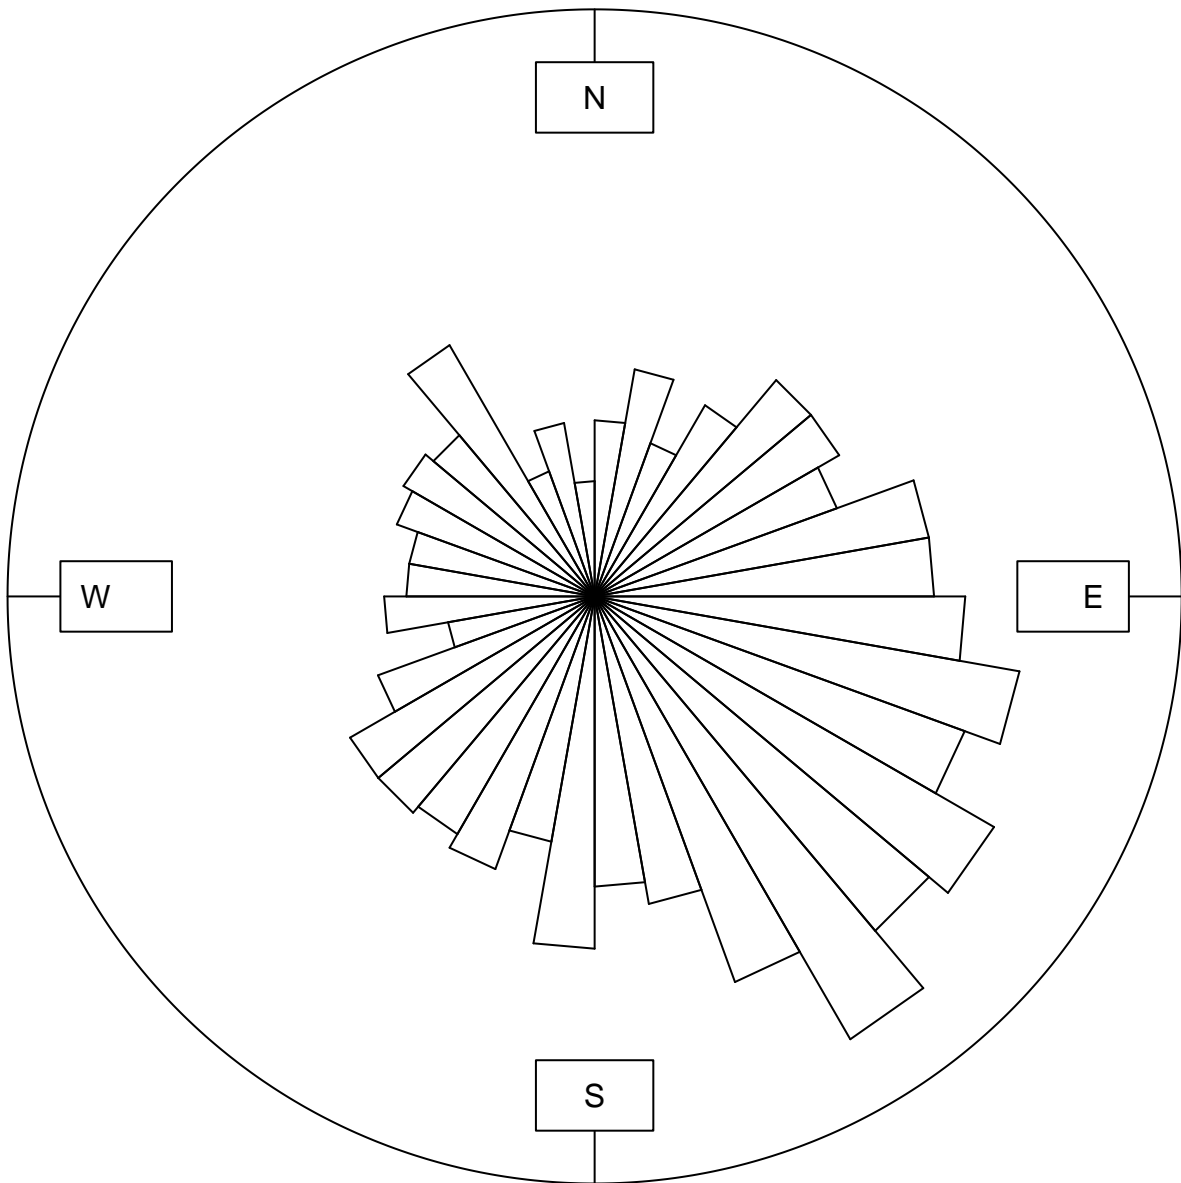

# bootstrap 525

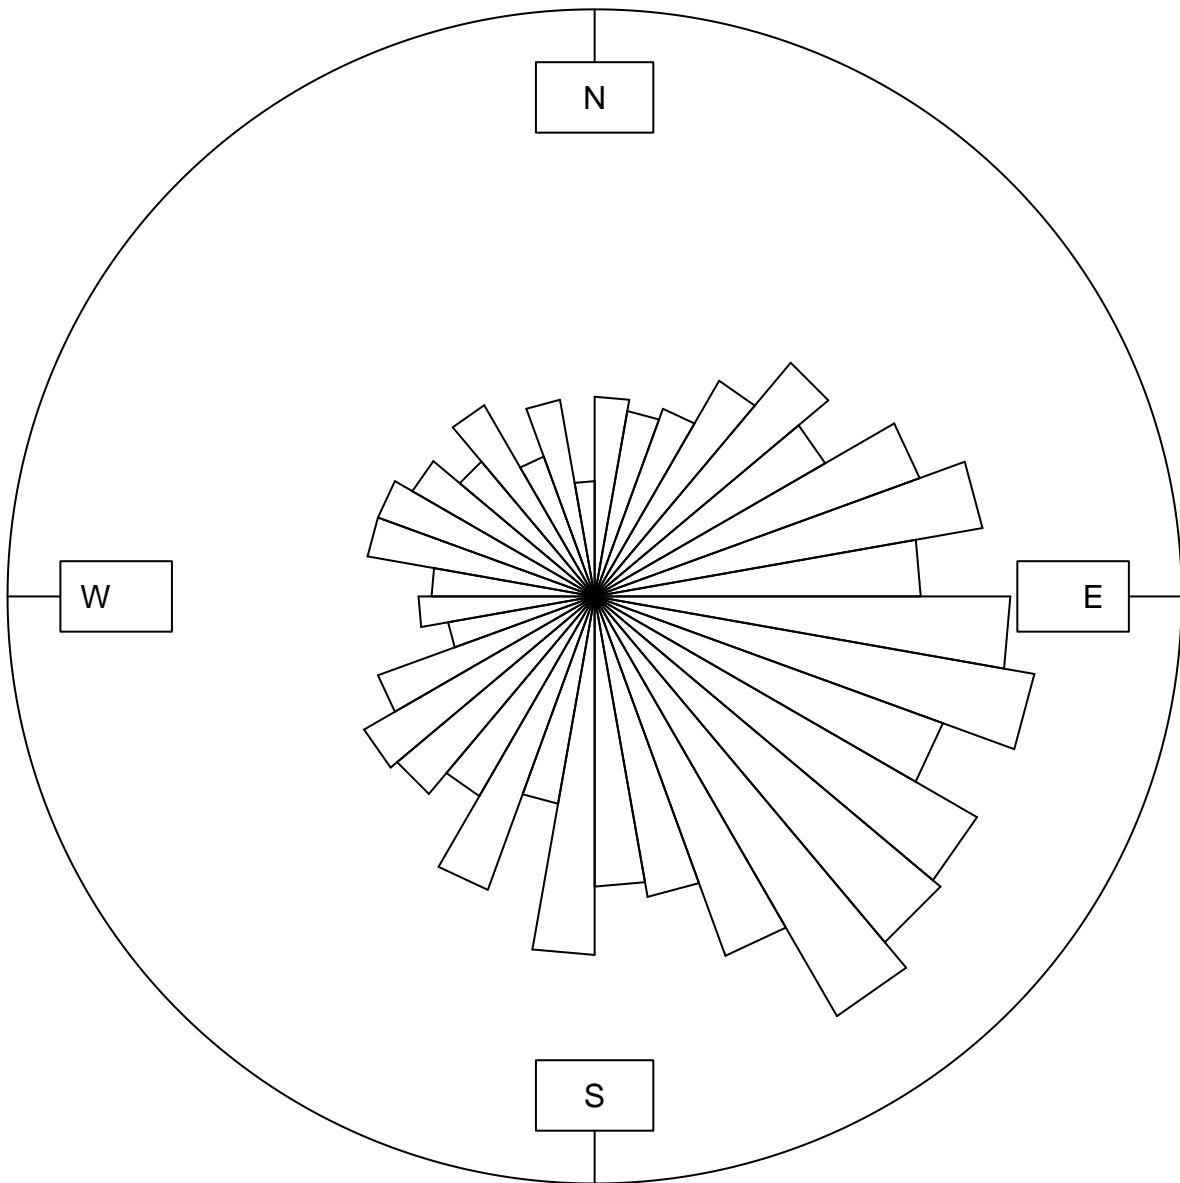

# bootstrap 526

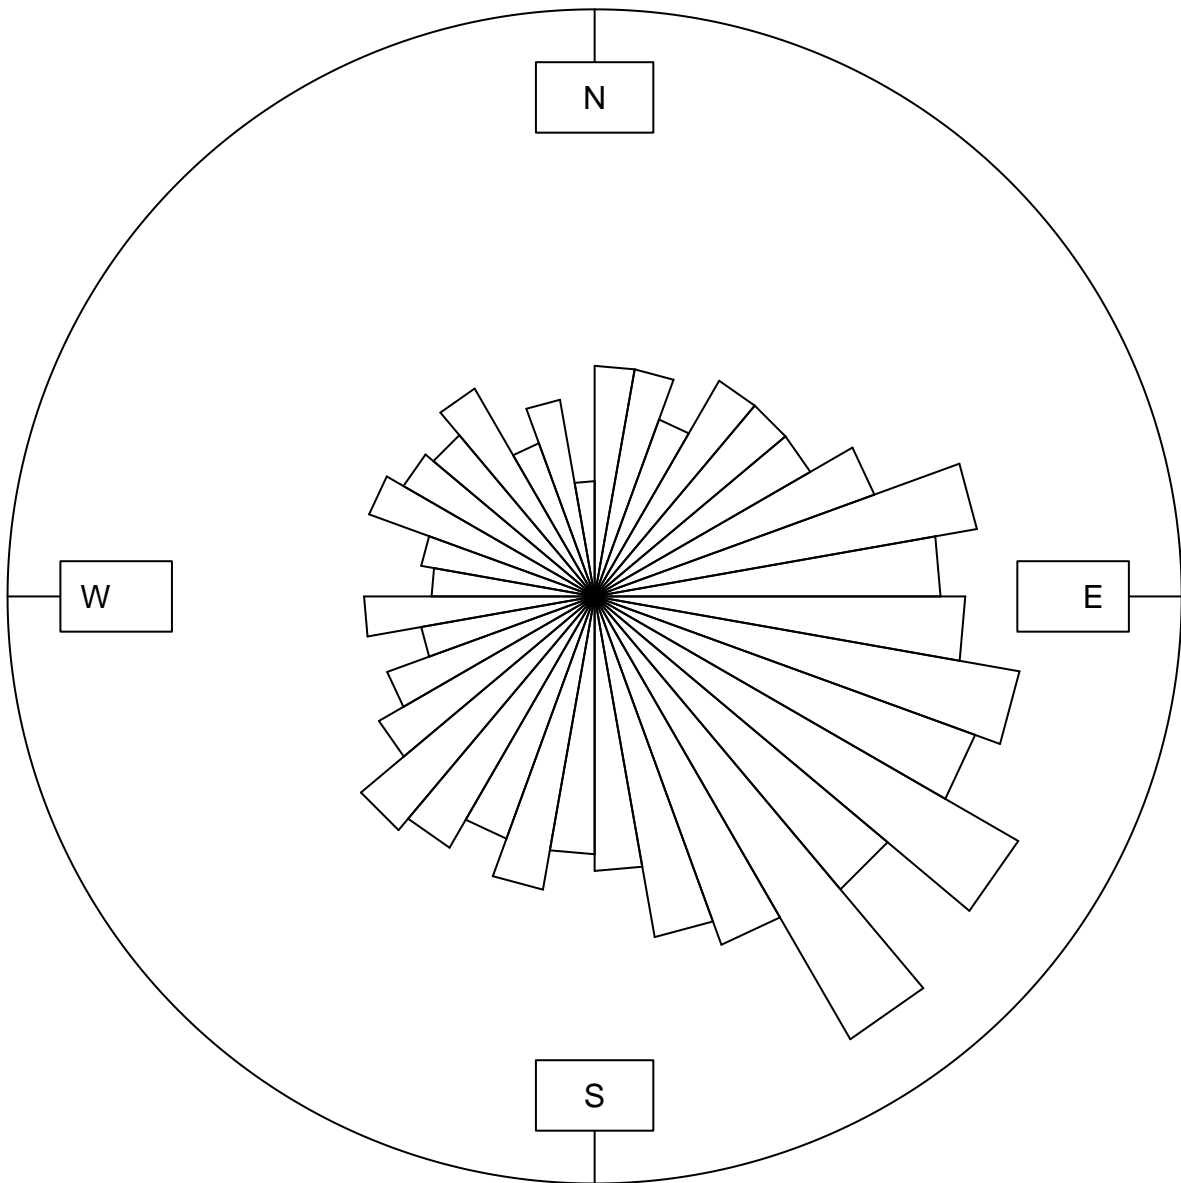

# bootstrap 527

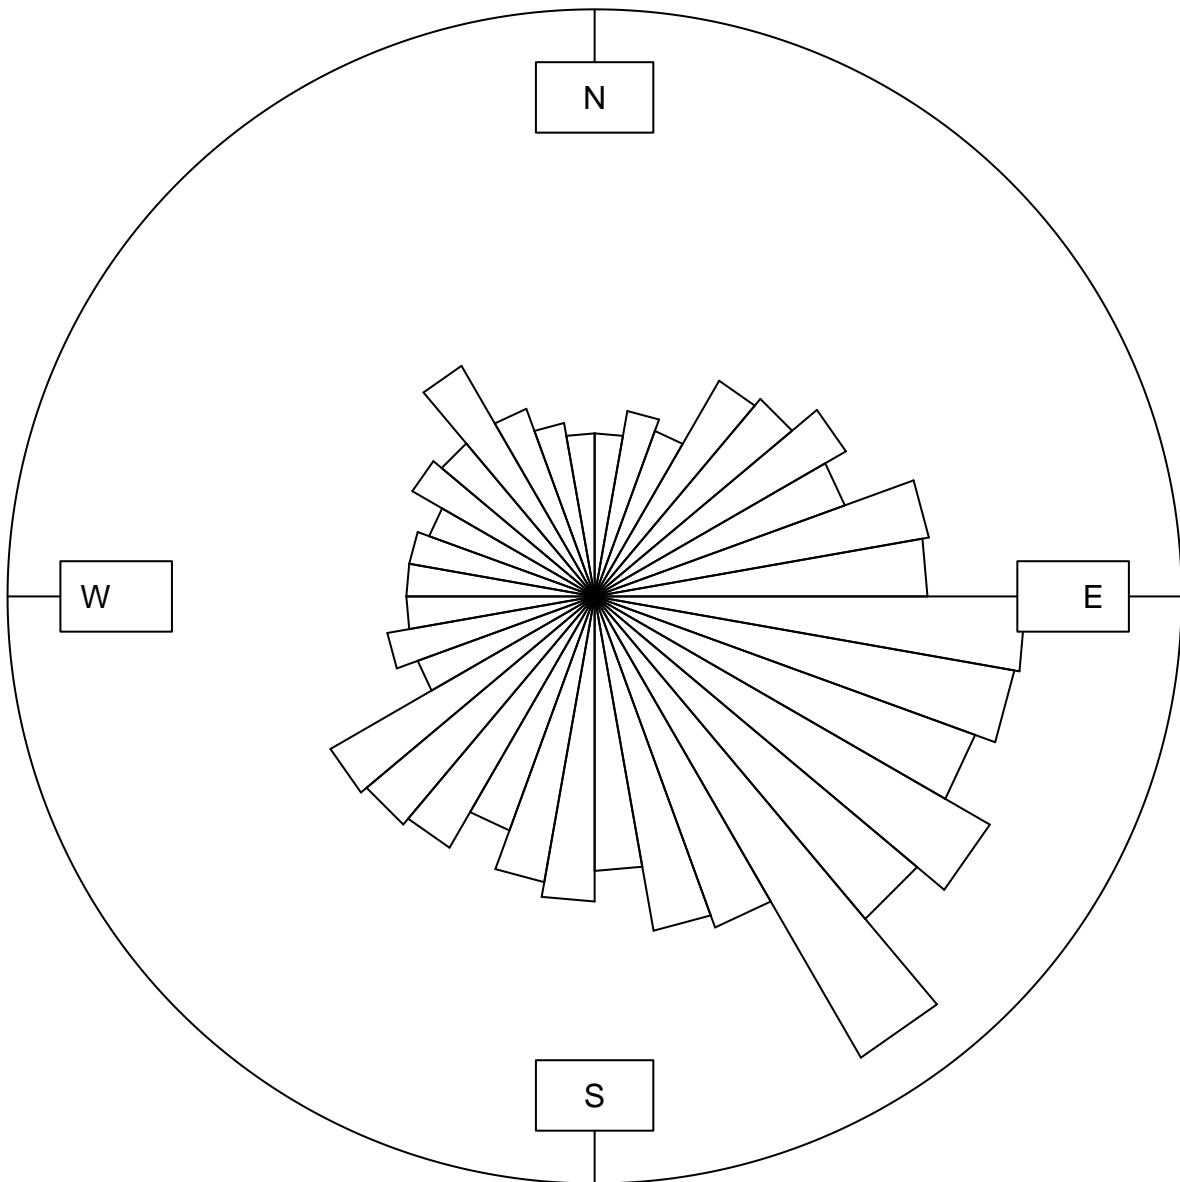

# bootstrap 528

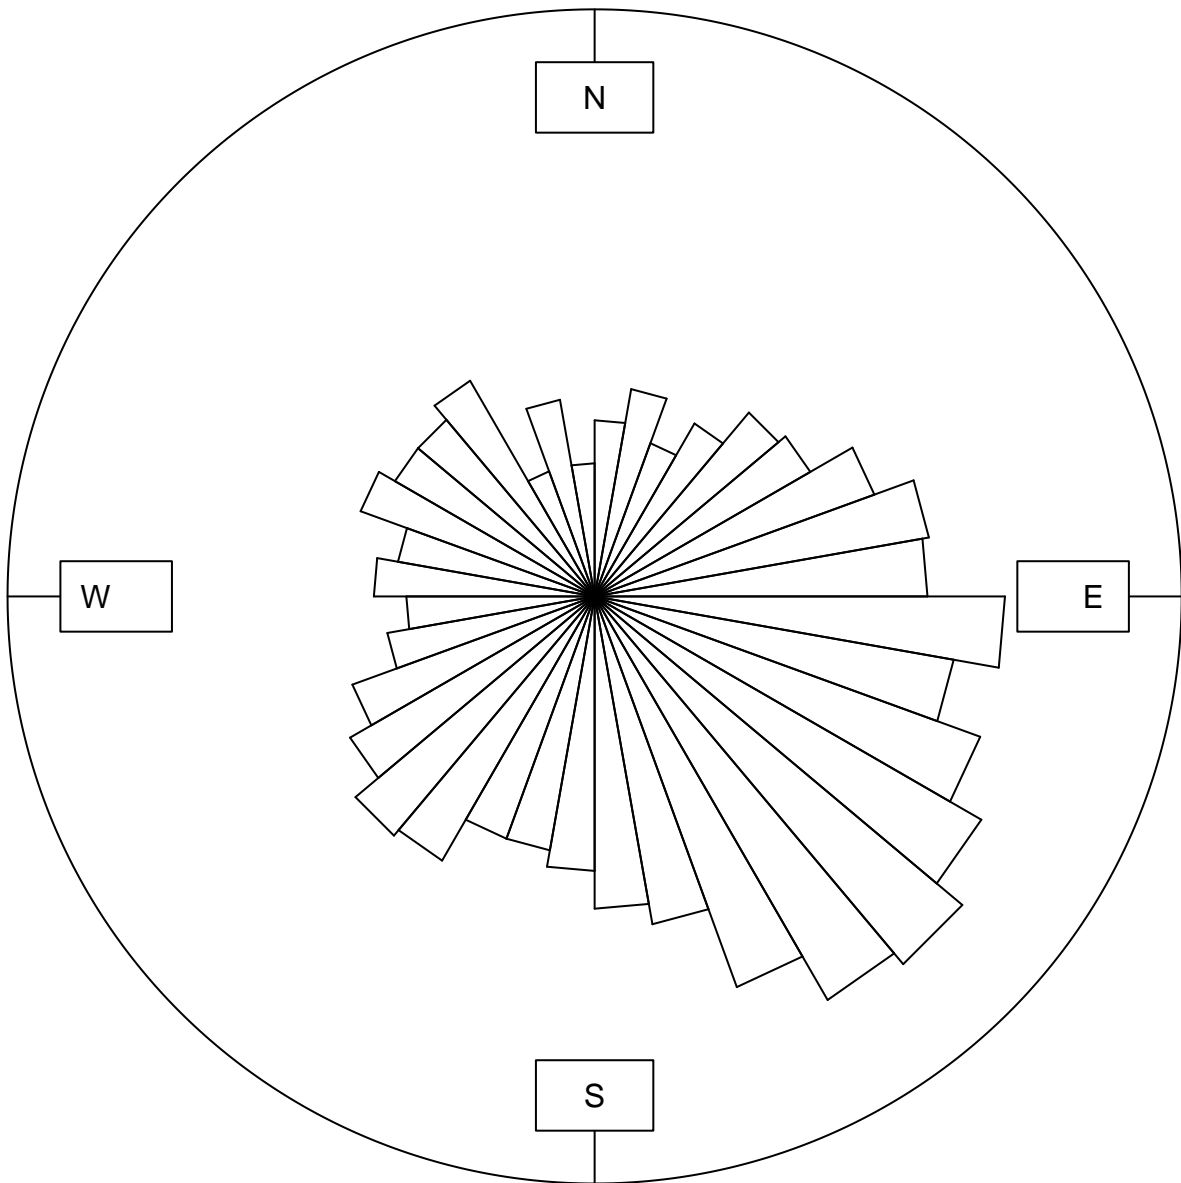



# bootstrap 529

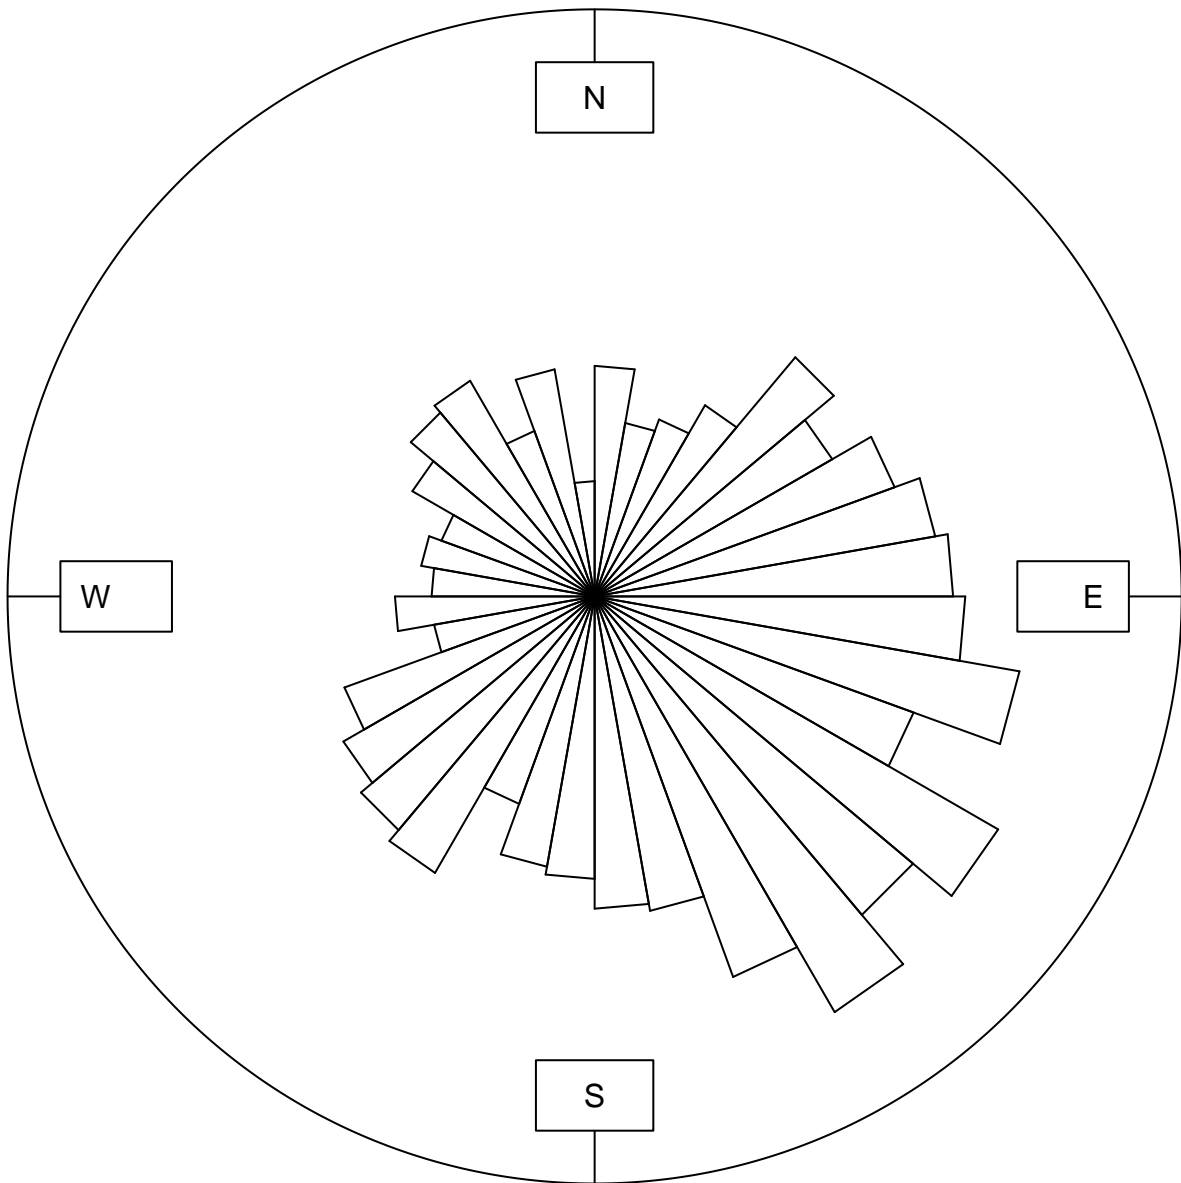

# bootstrap 530

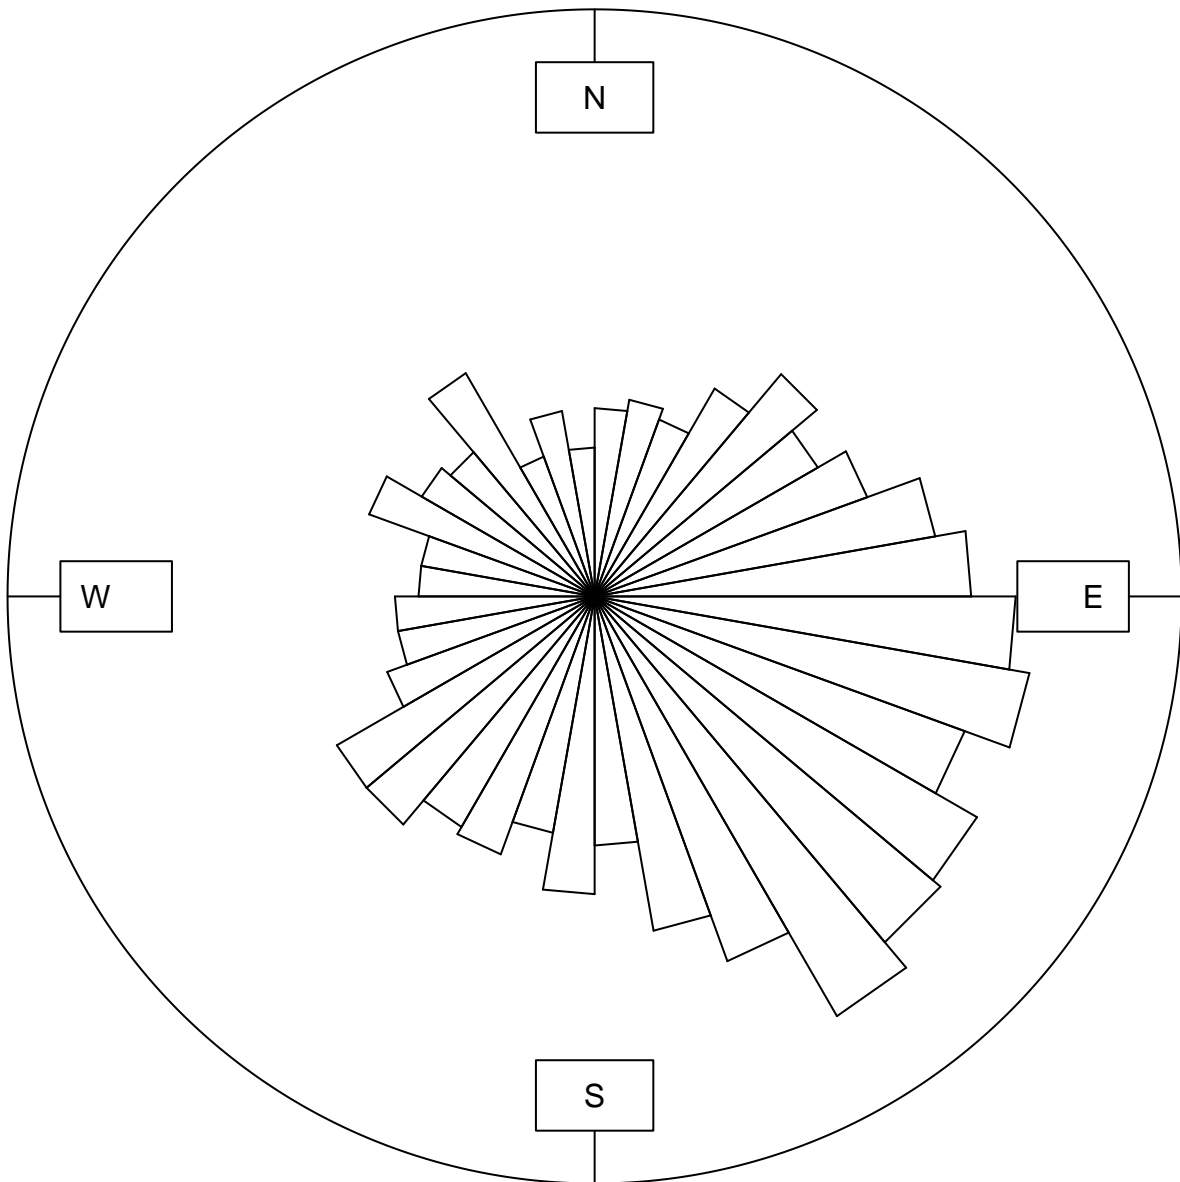

# bootstrap 531

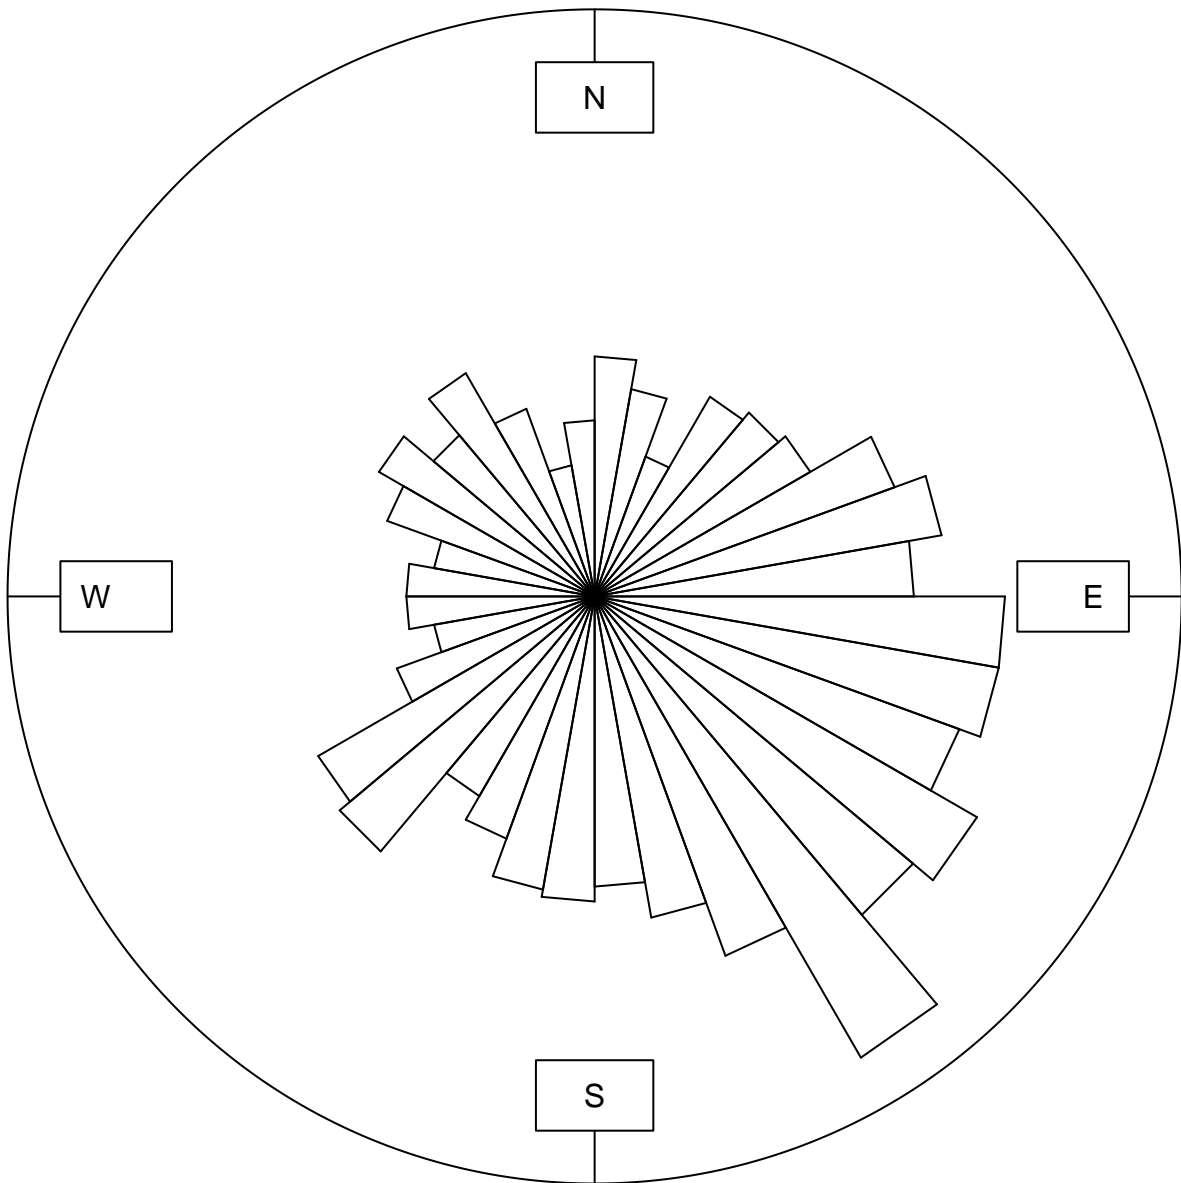

# bootstrap 532

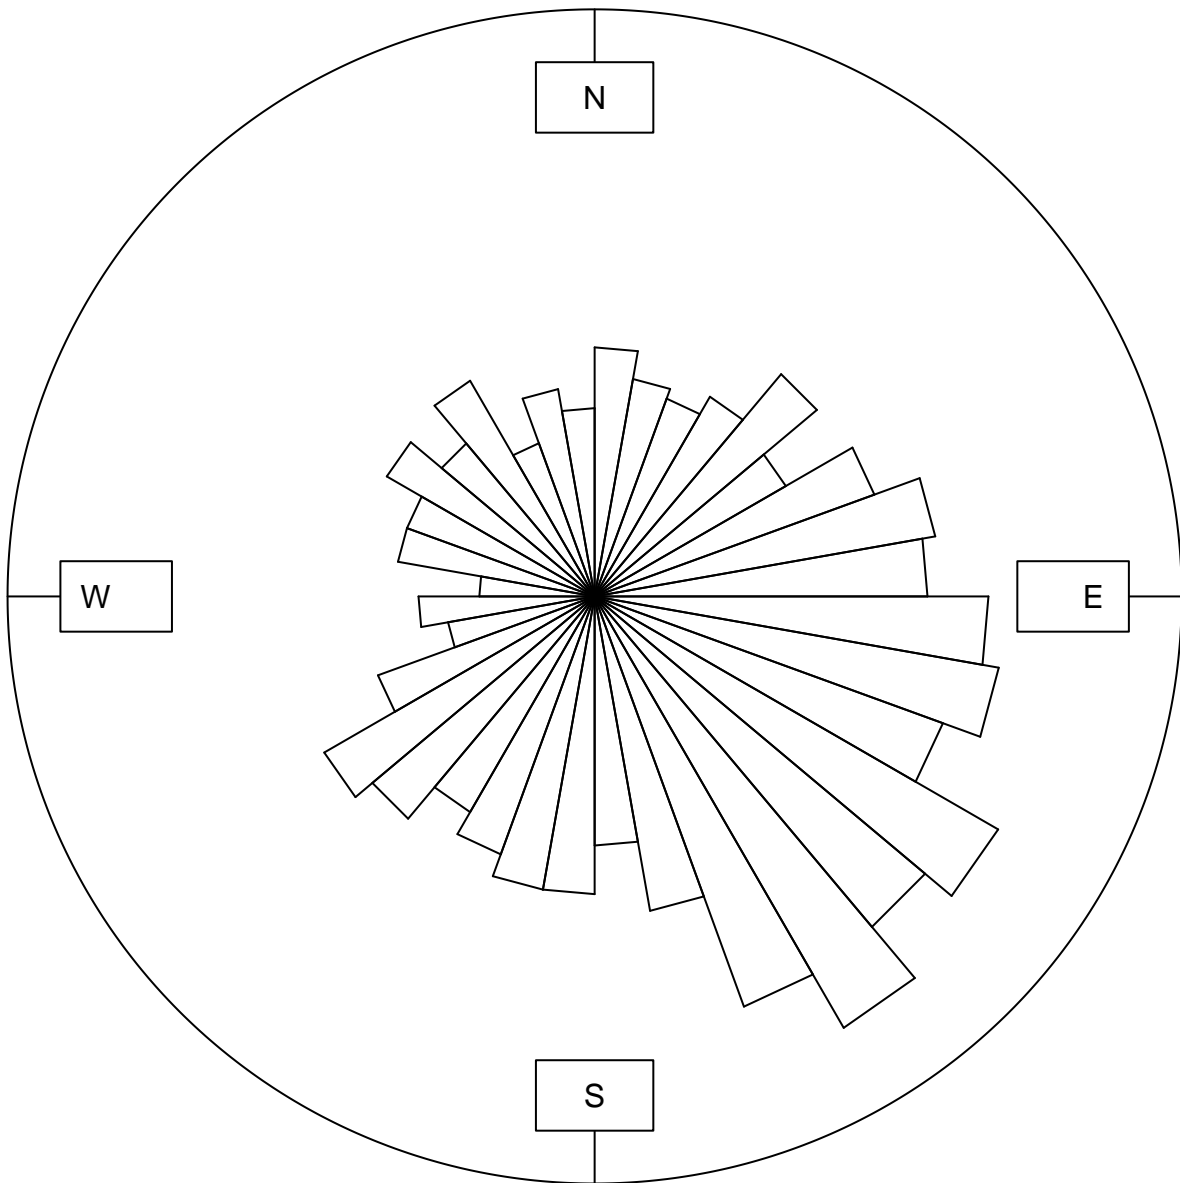

# bootstrap 533

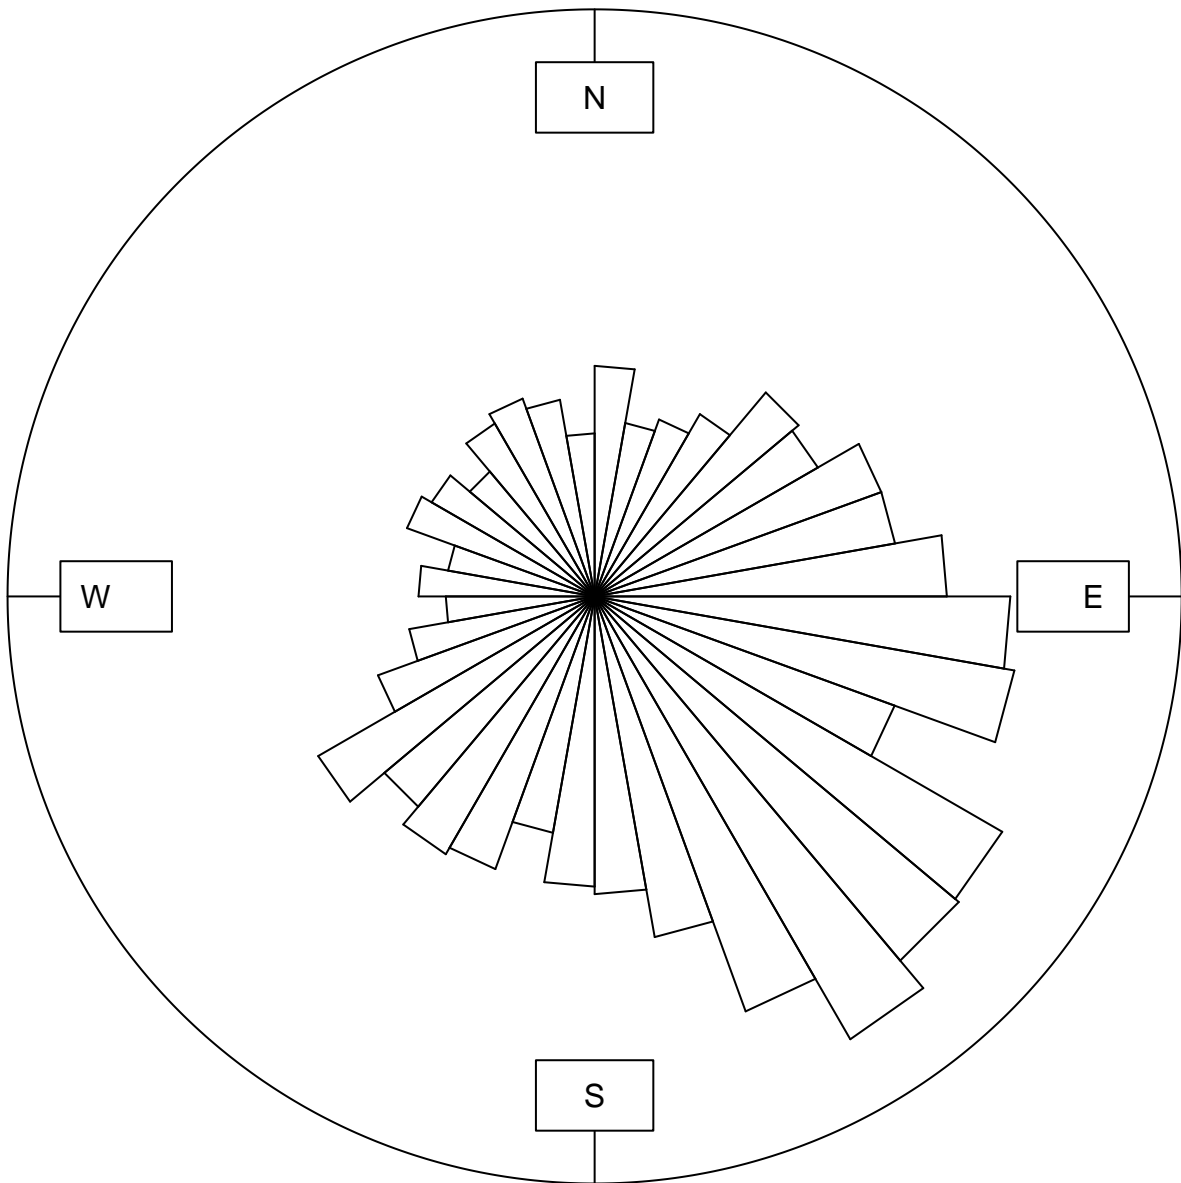

# bootstrap 534

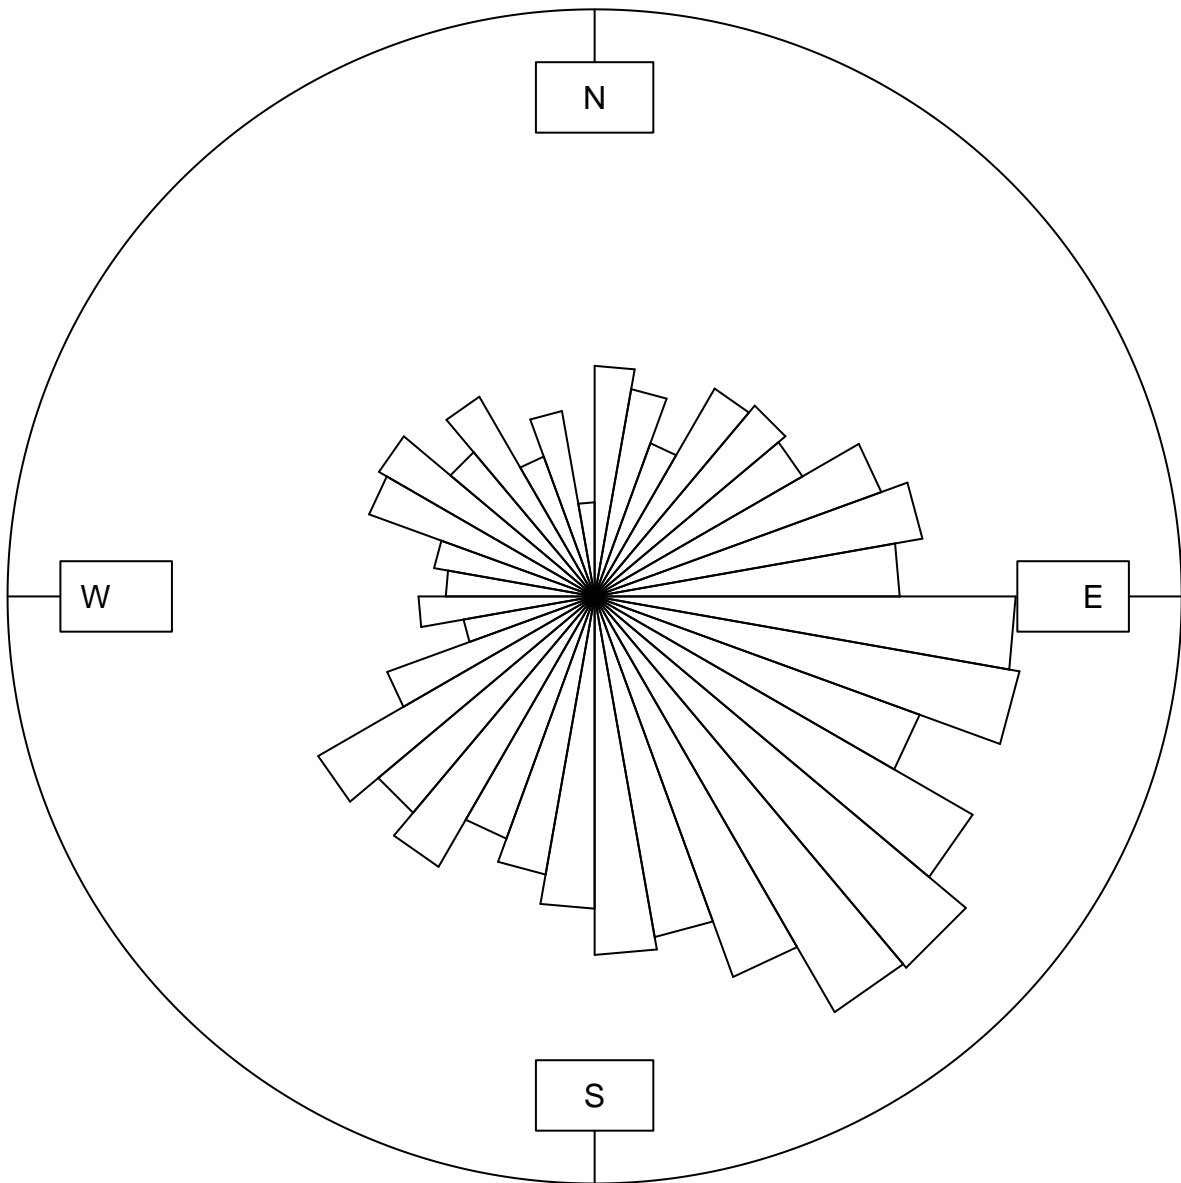

# bootstrap 535

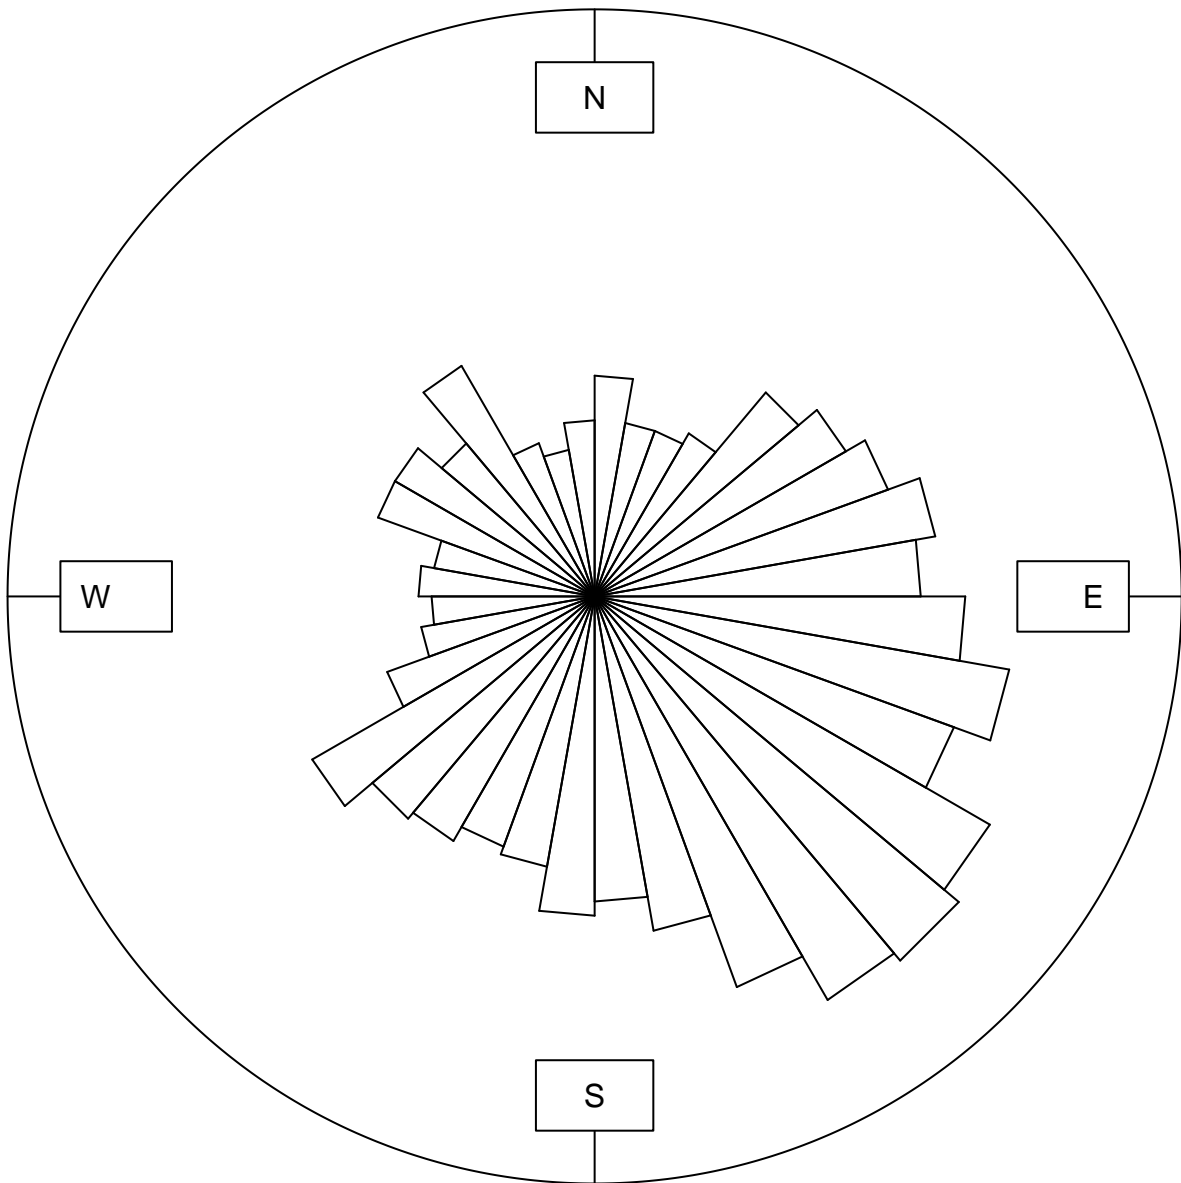

# bootstrap 536

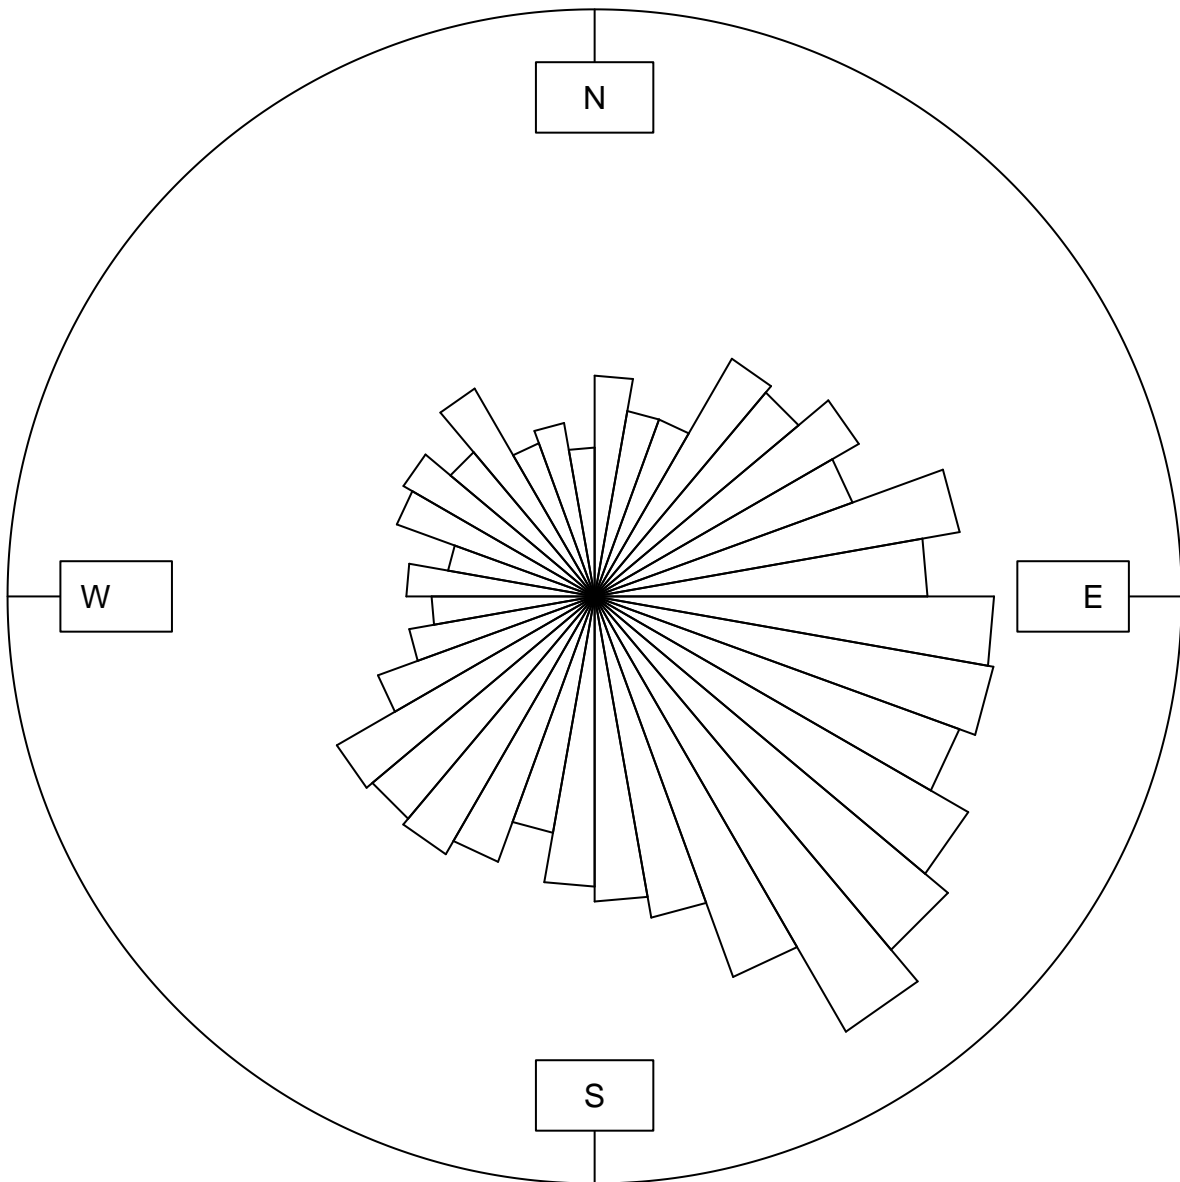



# bootstrap 537

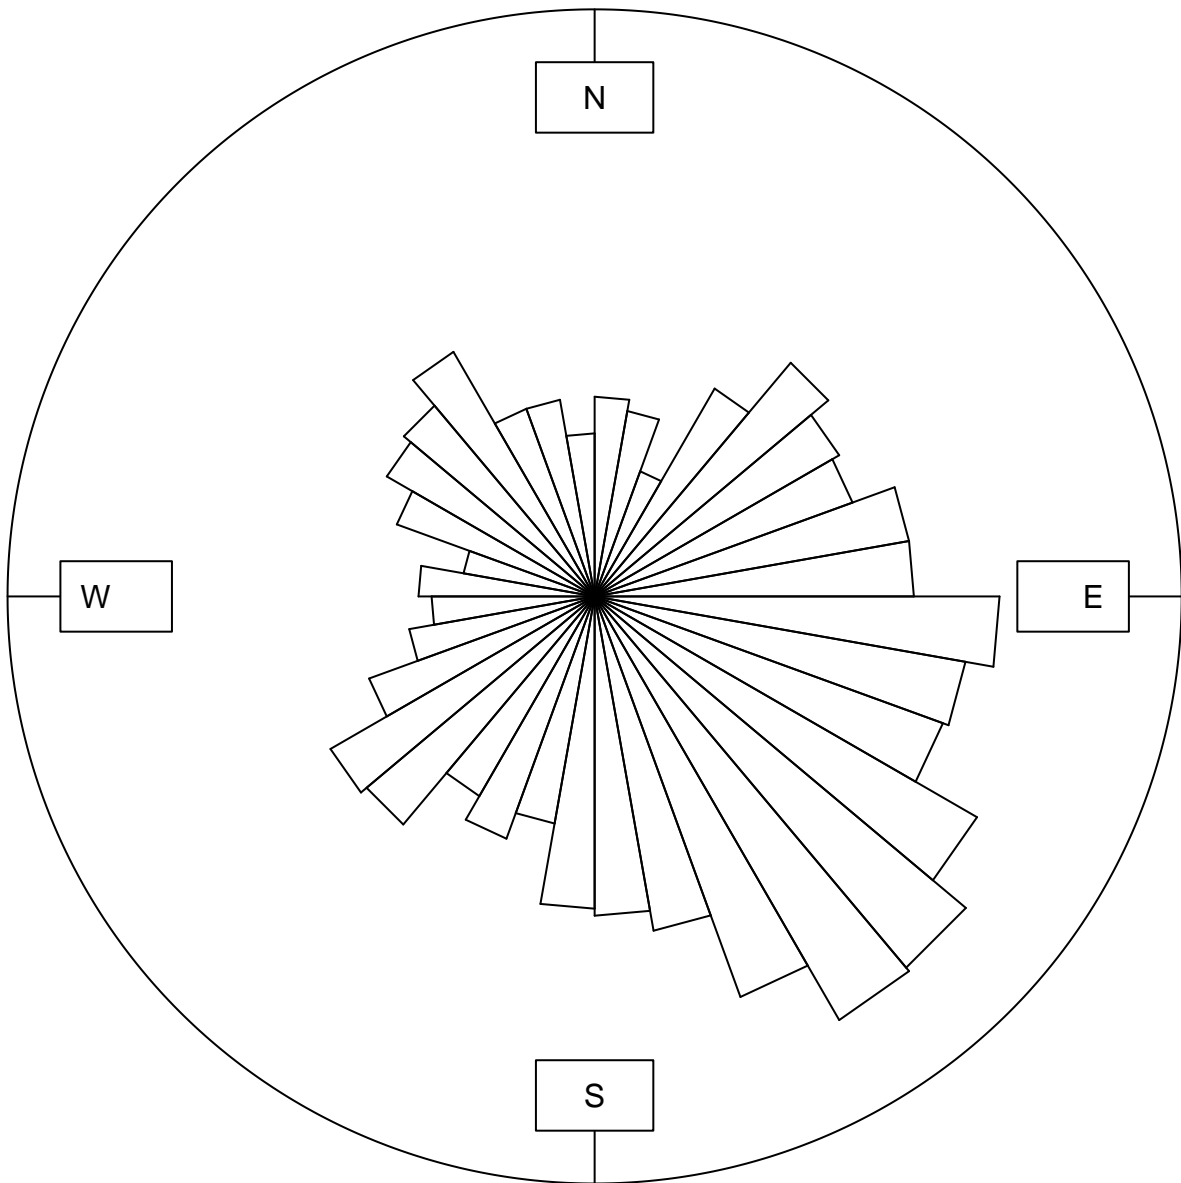

# bootstrap 538

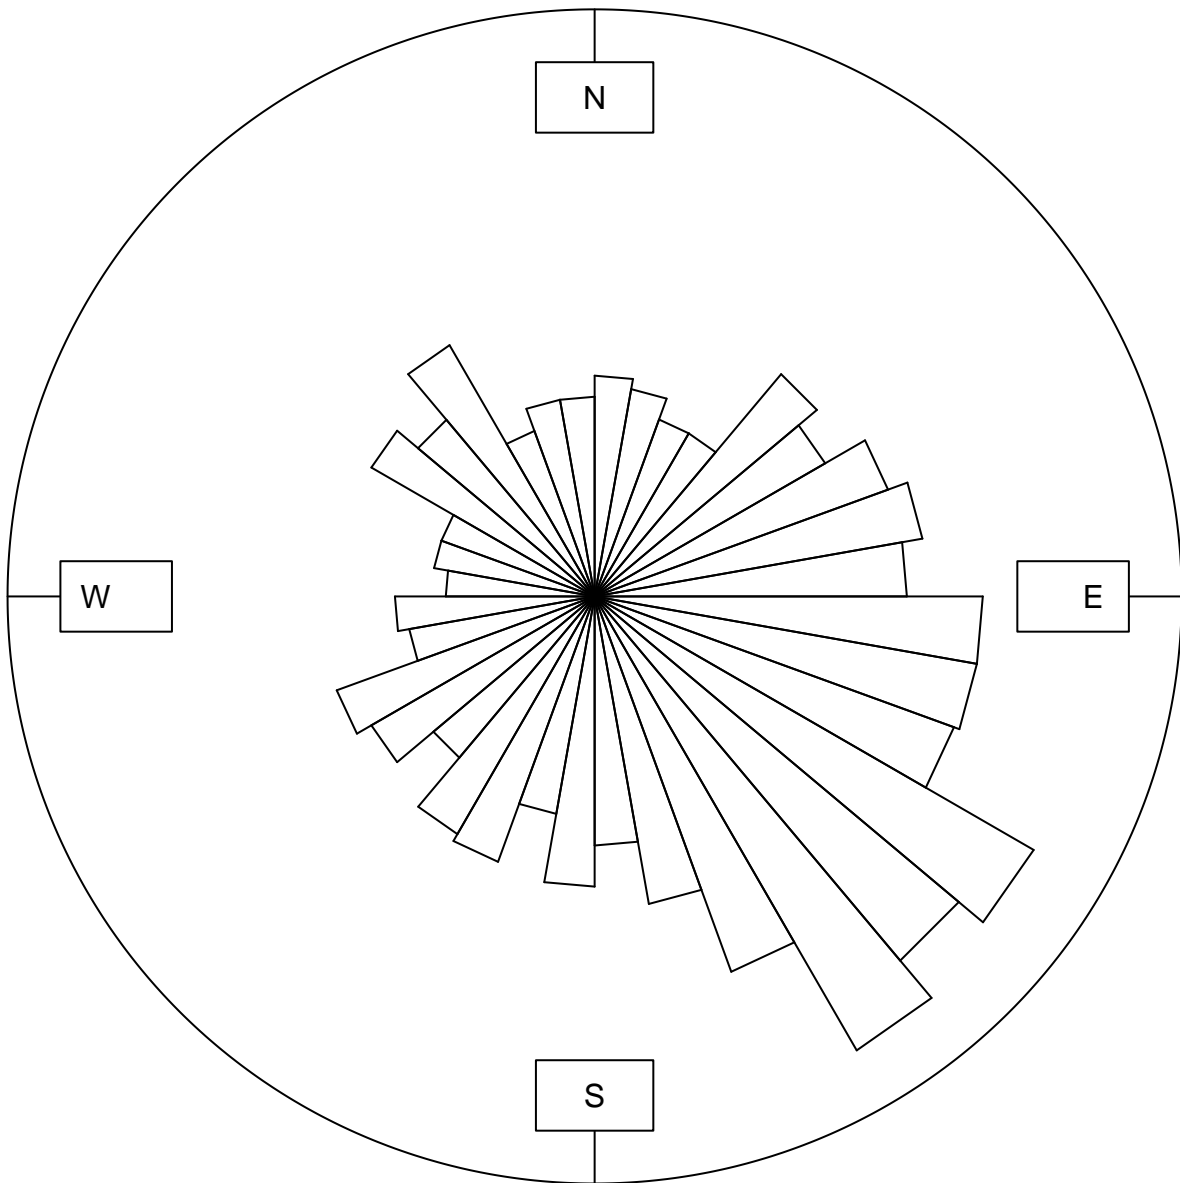

# bootstrap 539

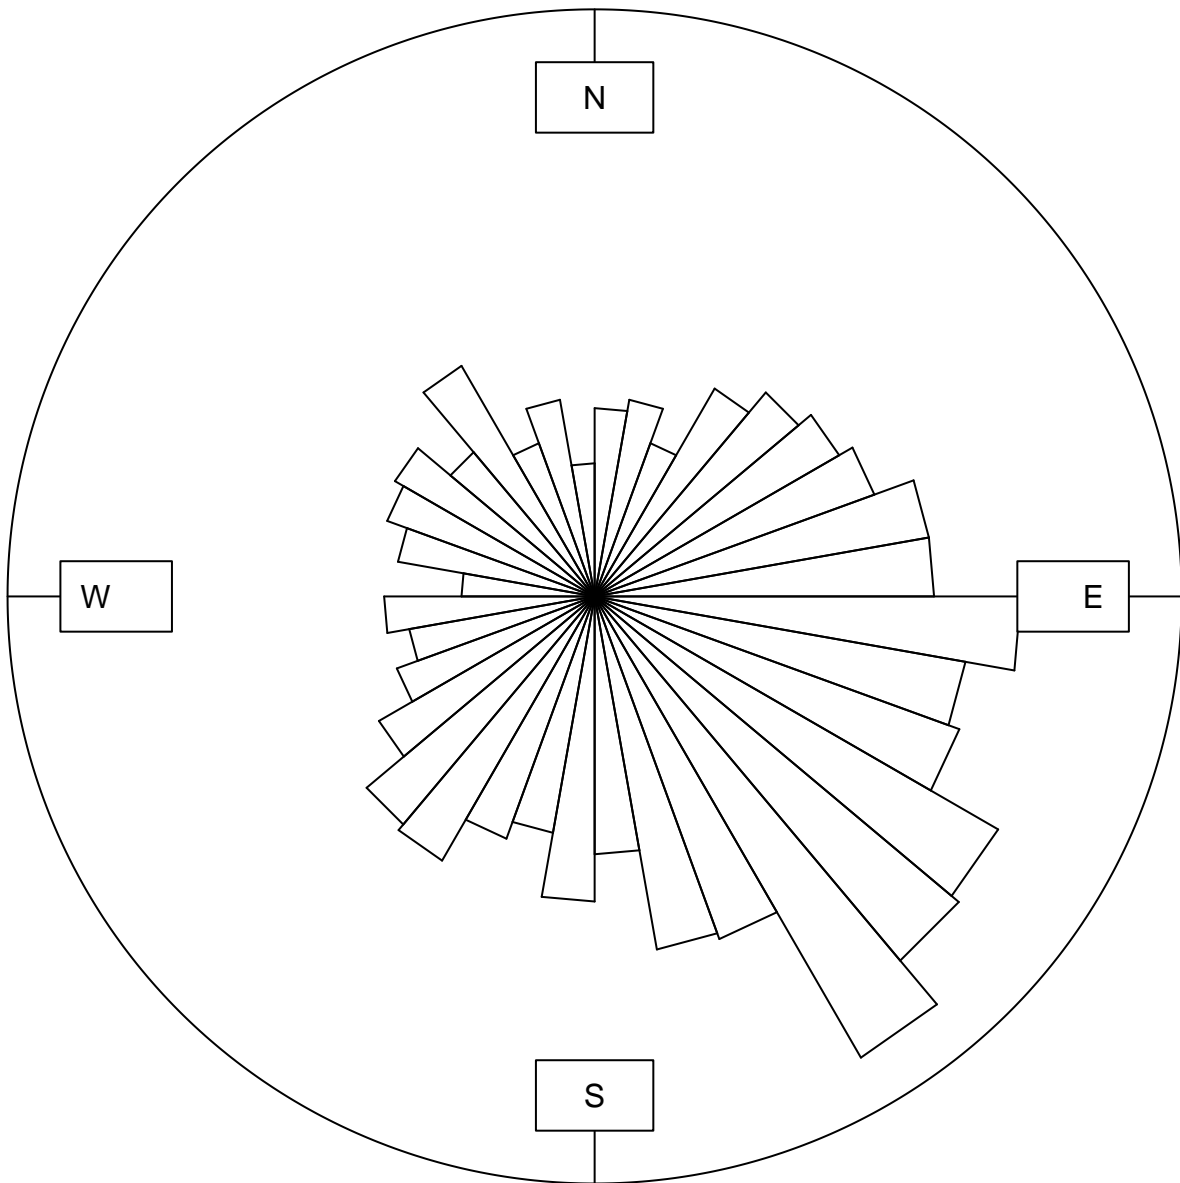

# bootstrap 540

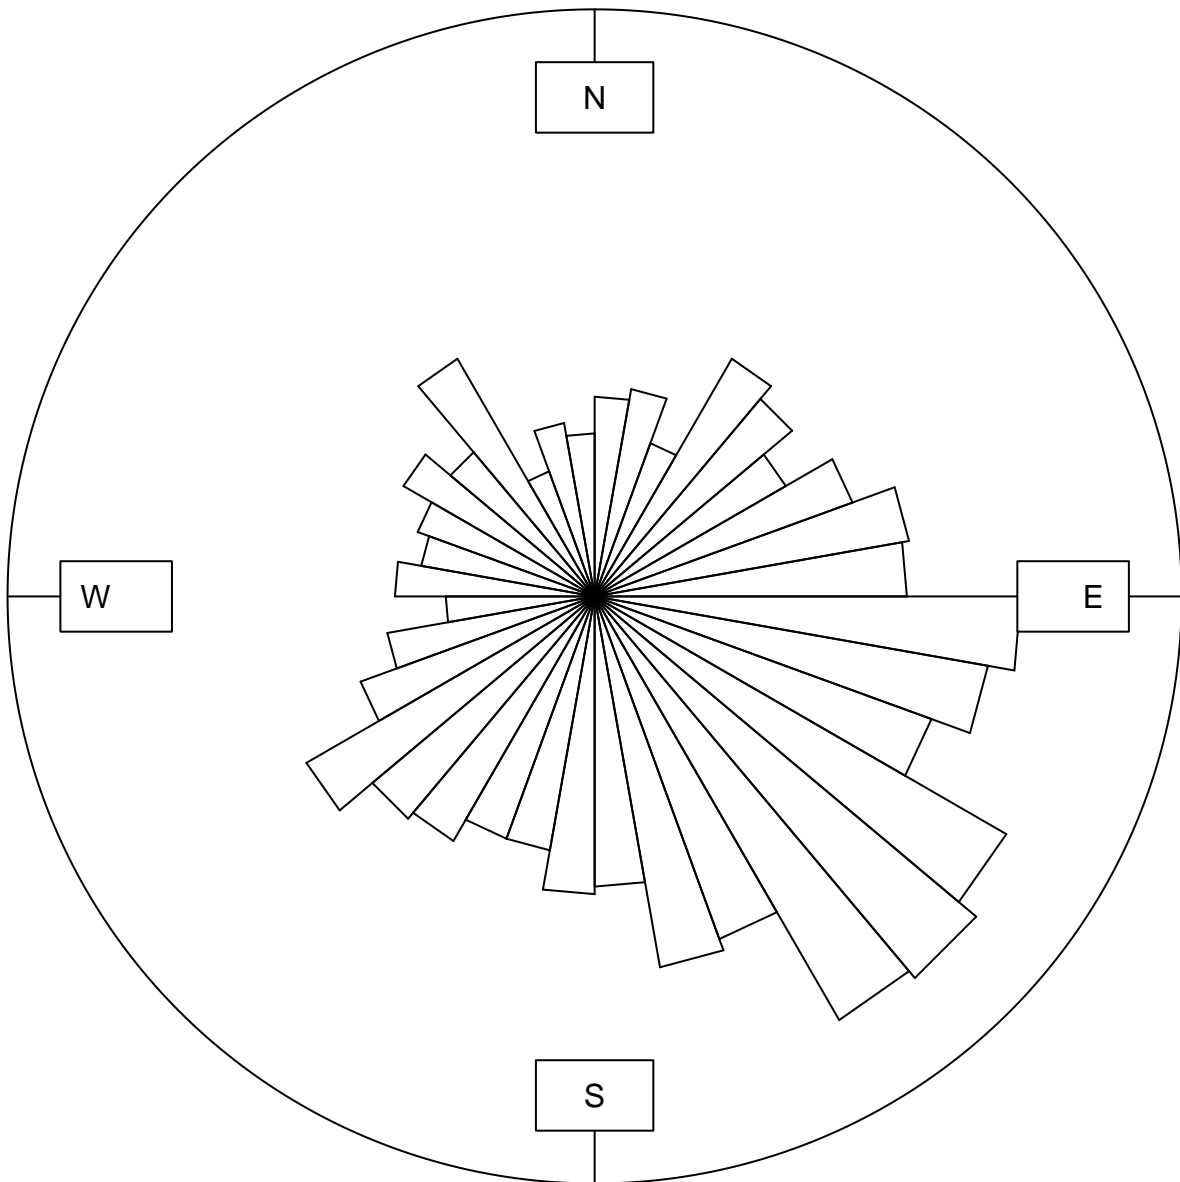

# bootstrap 541

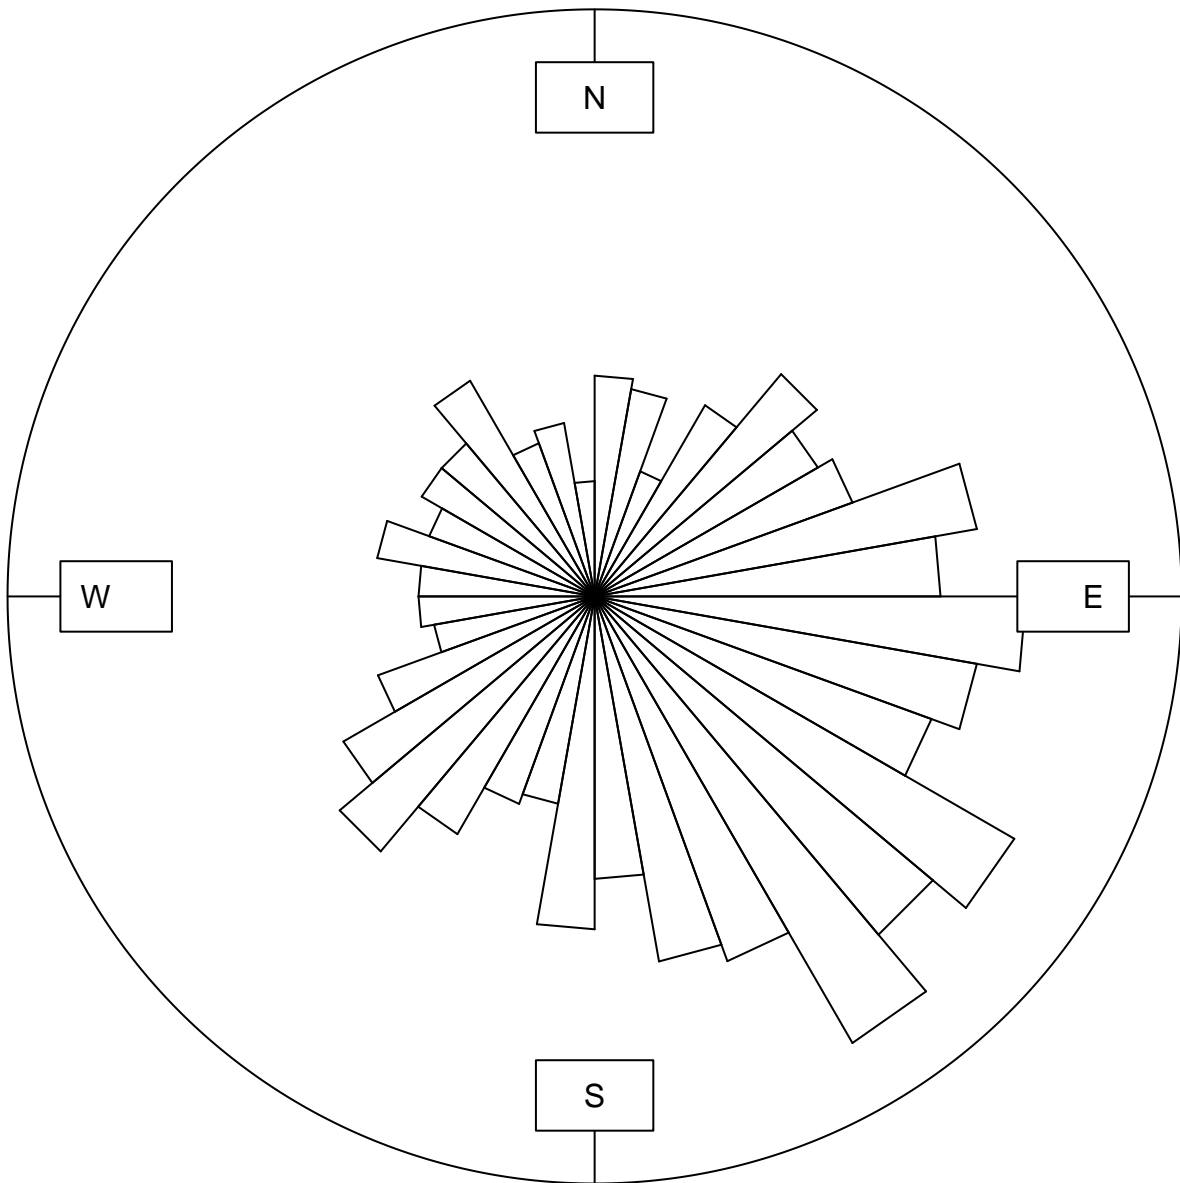

# bootstrap 542

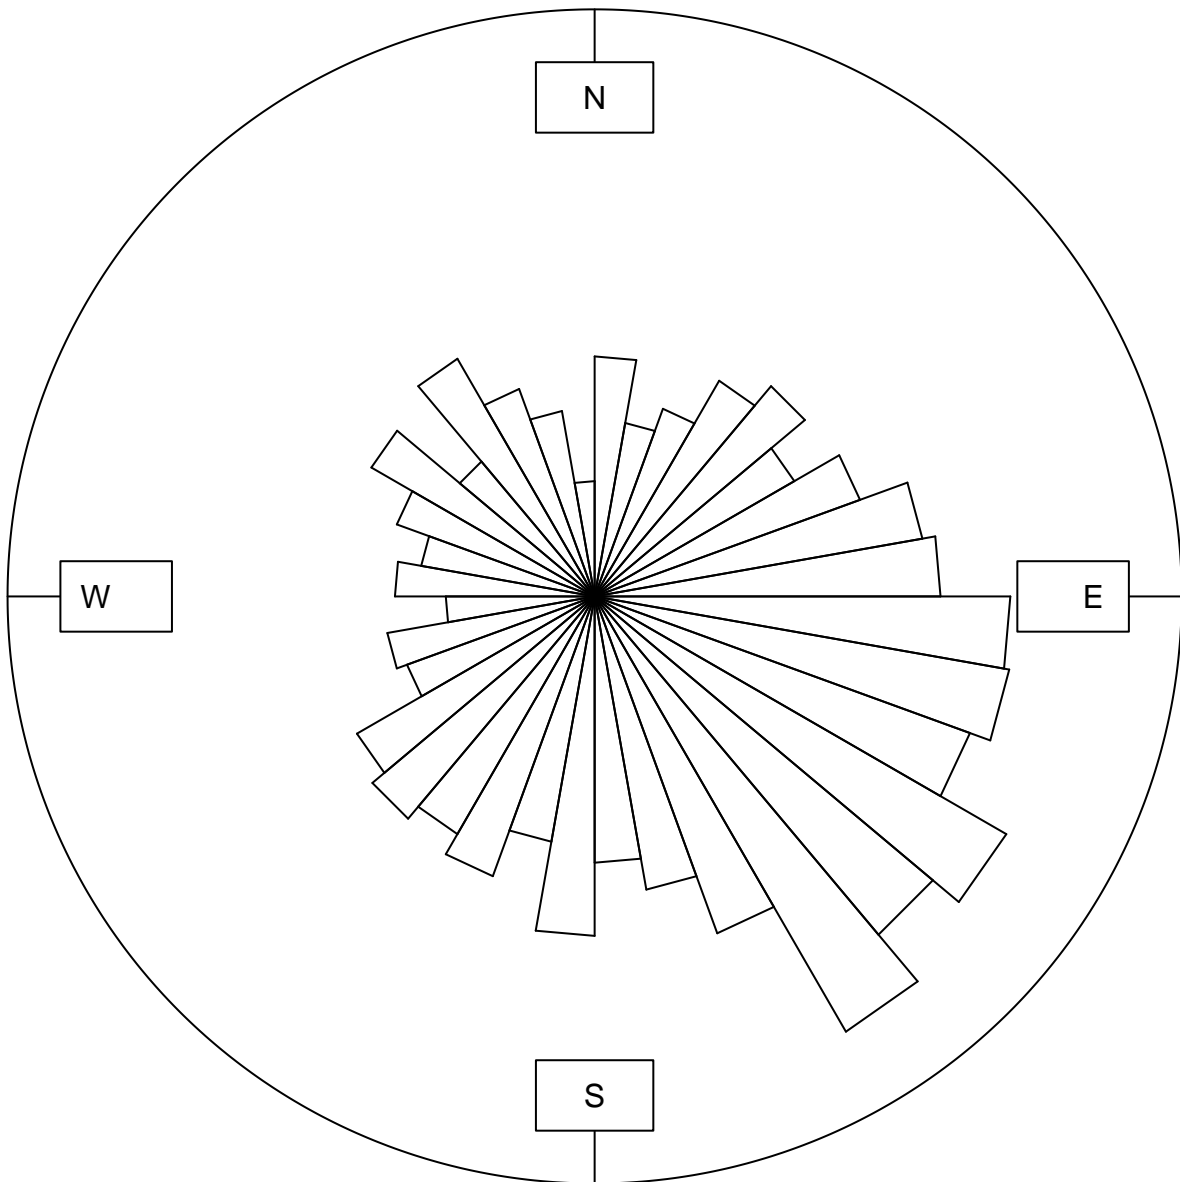

# bootstrap 543

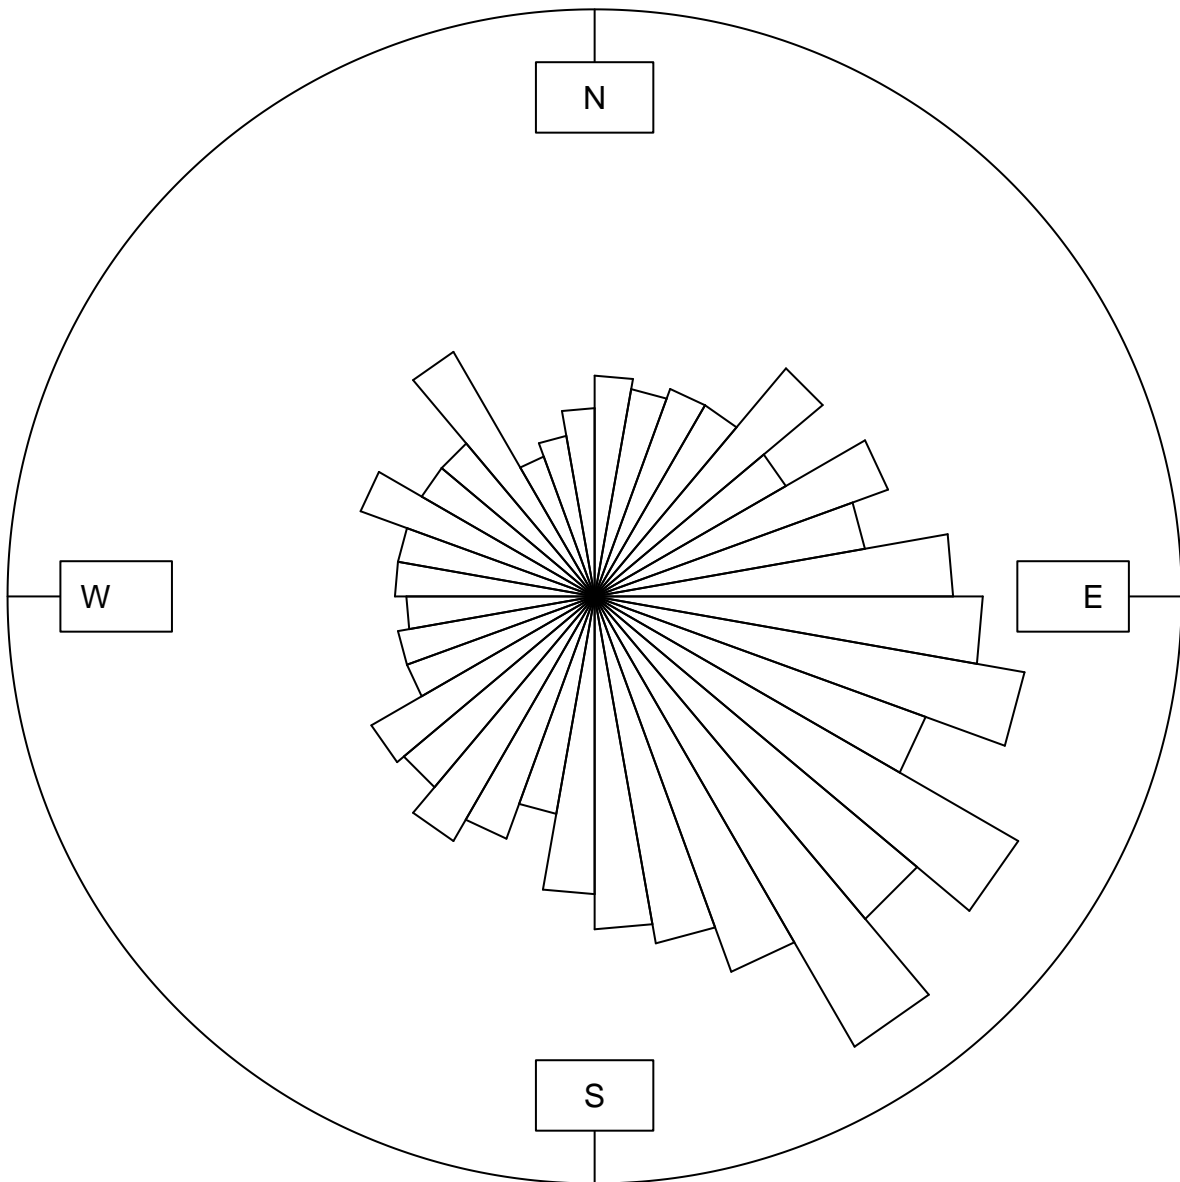

# bootstrap 544

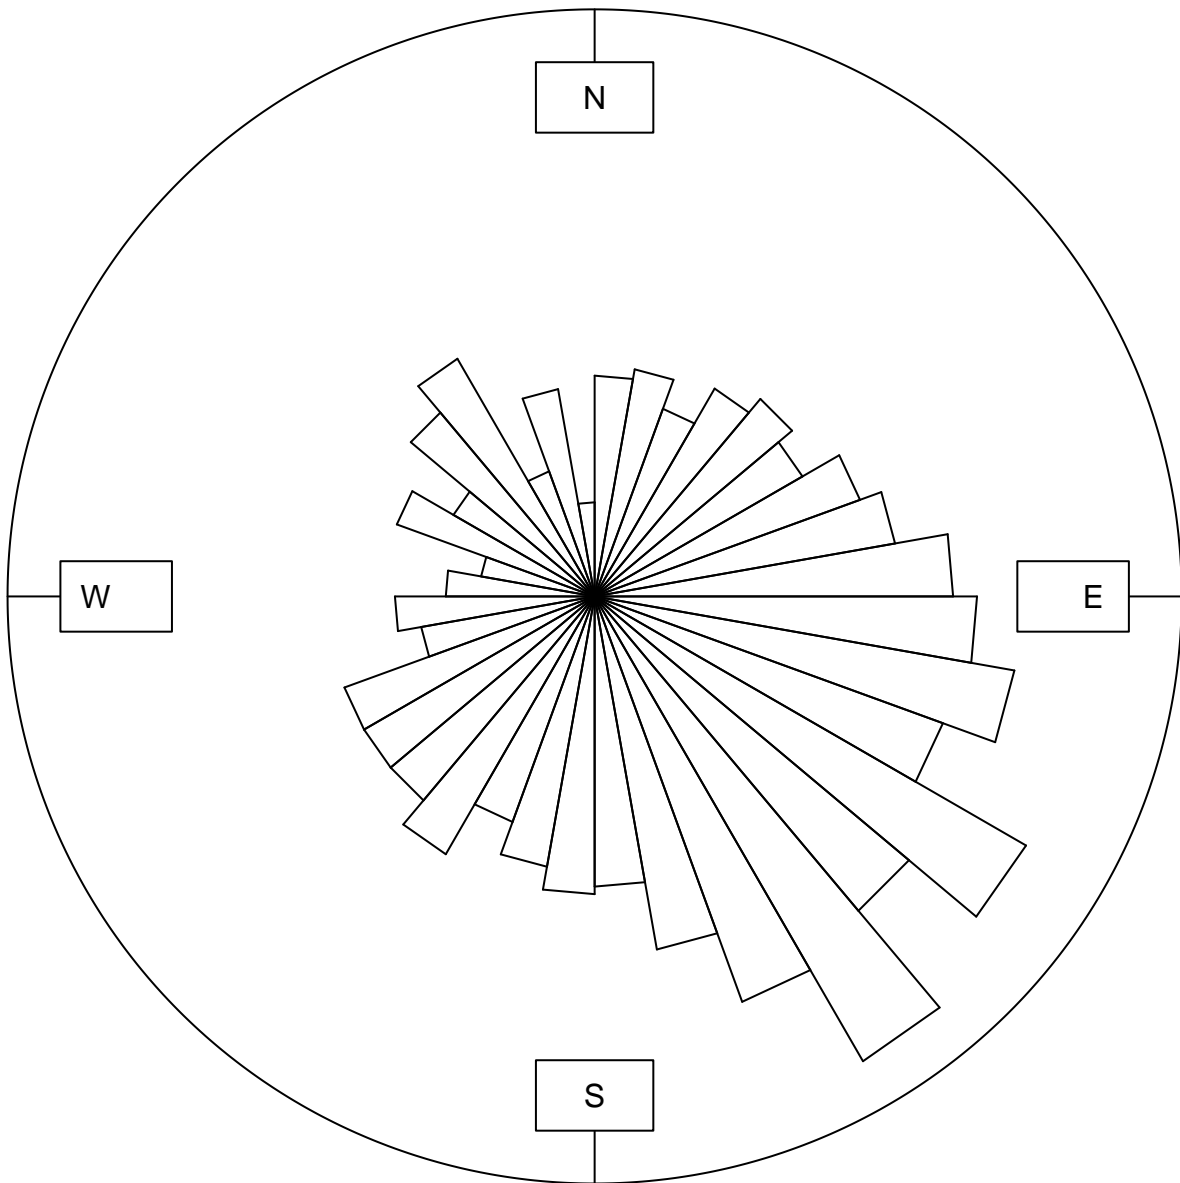



# bootstrap 545

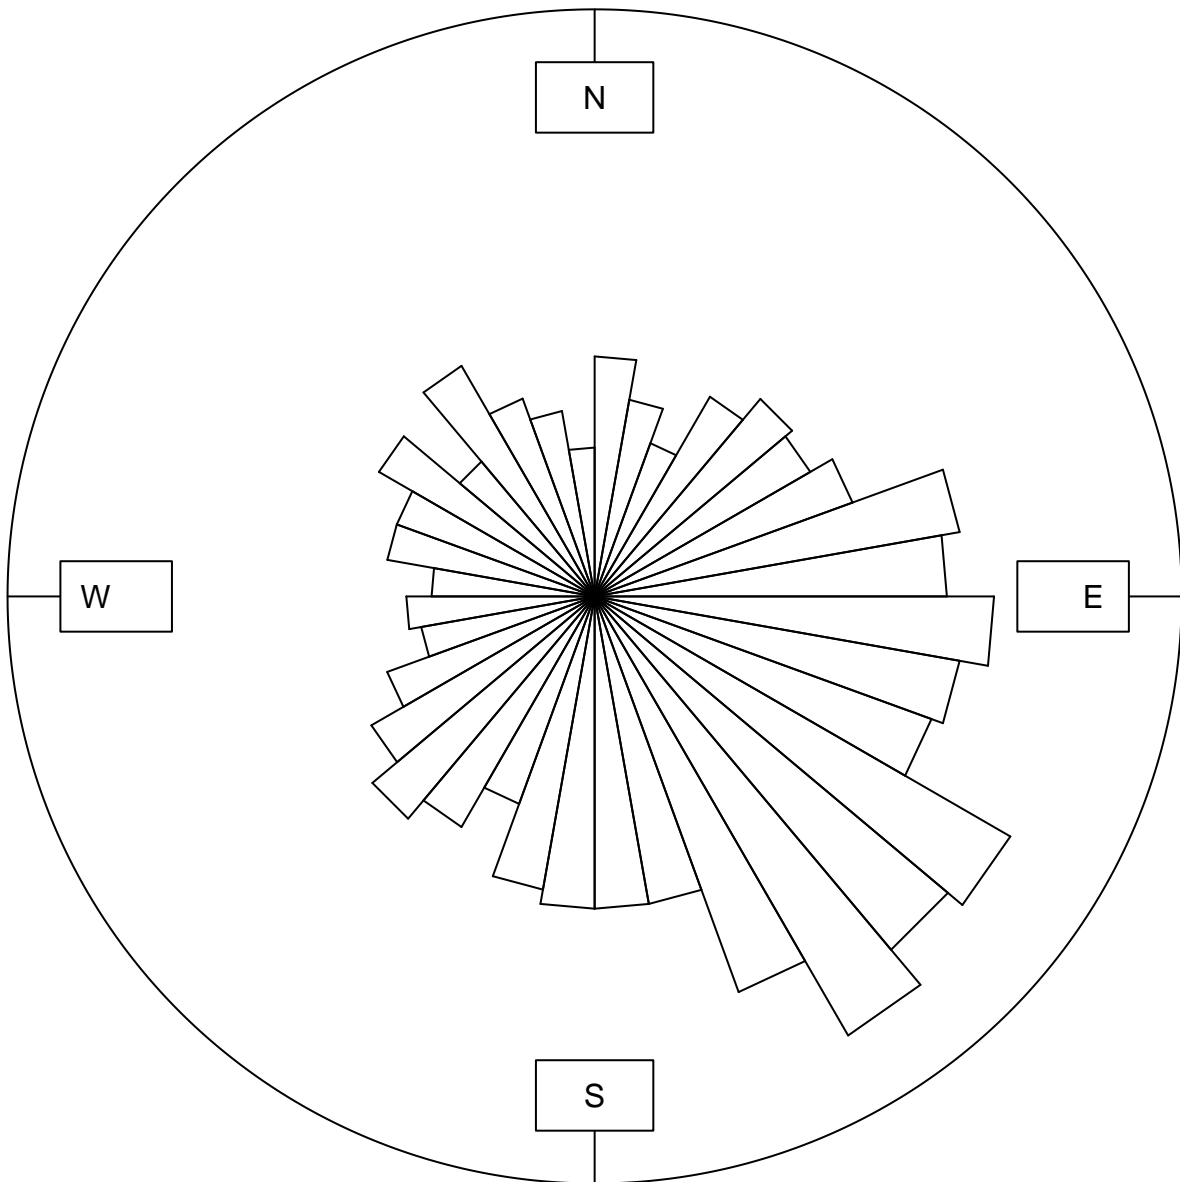

# bootstrap 546

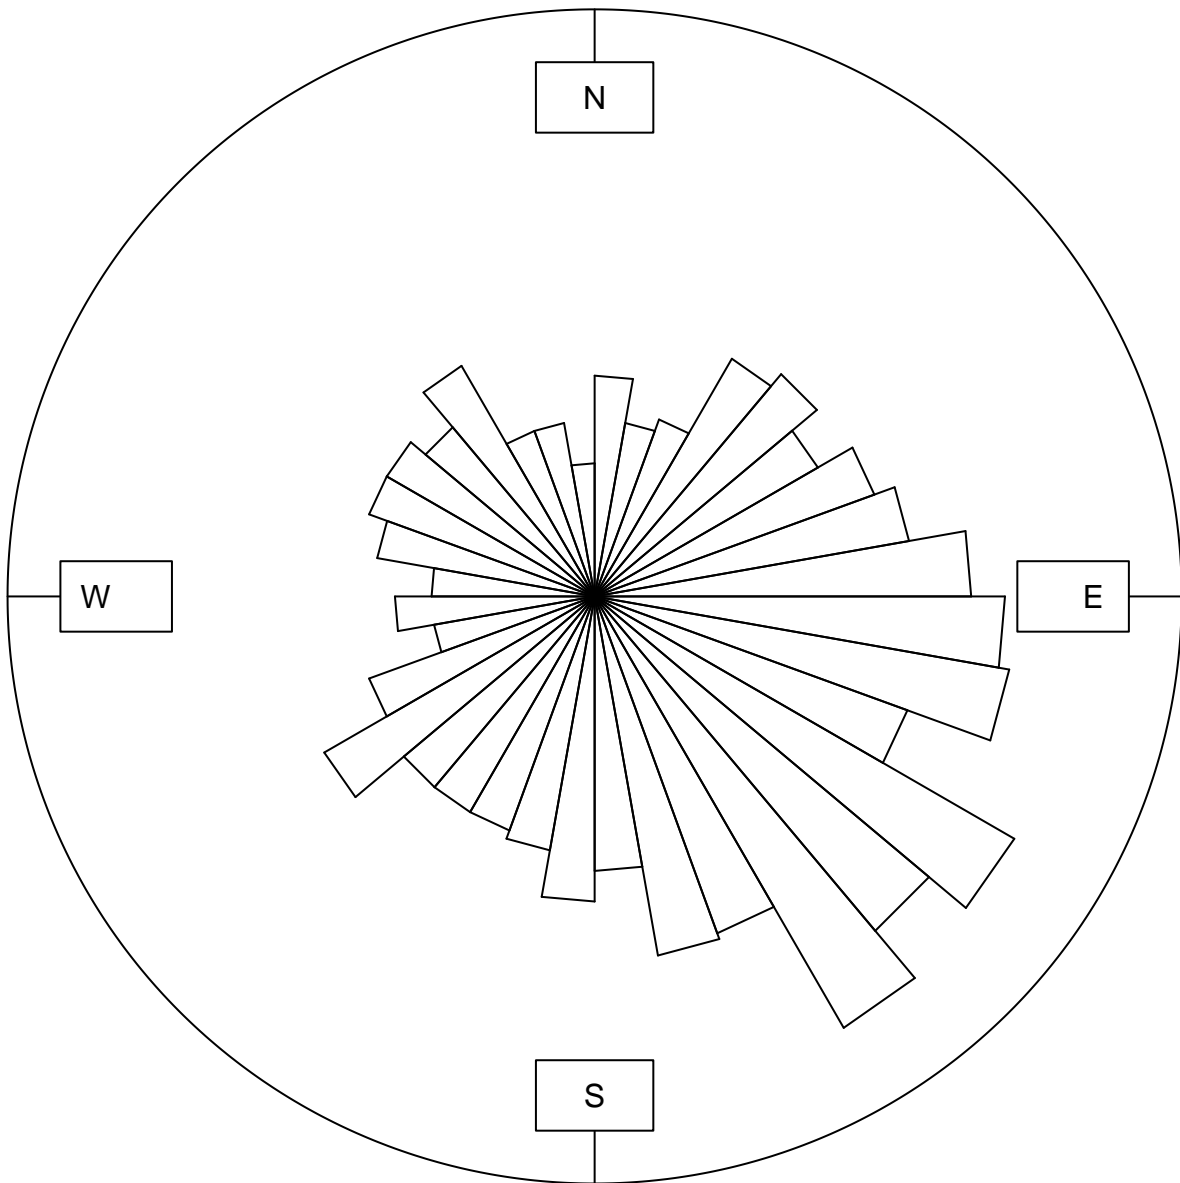

# bootstrap 547

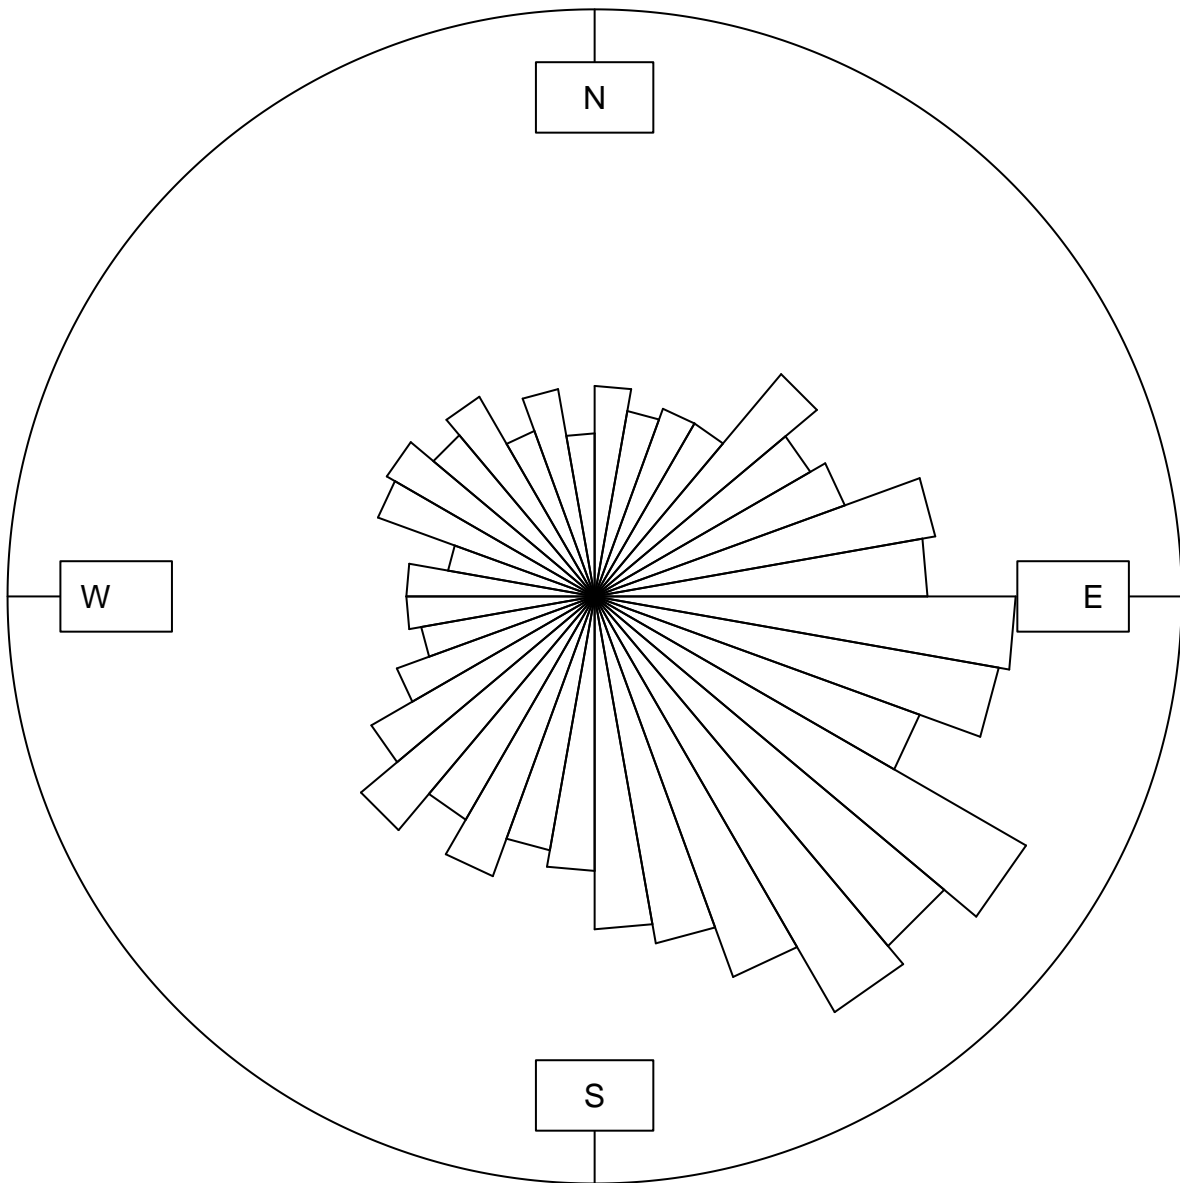

# bootstrap 548

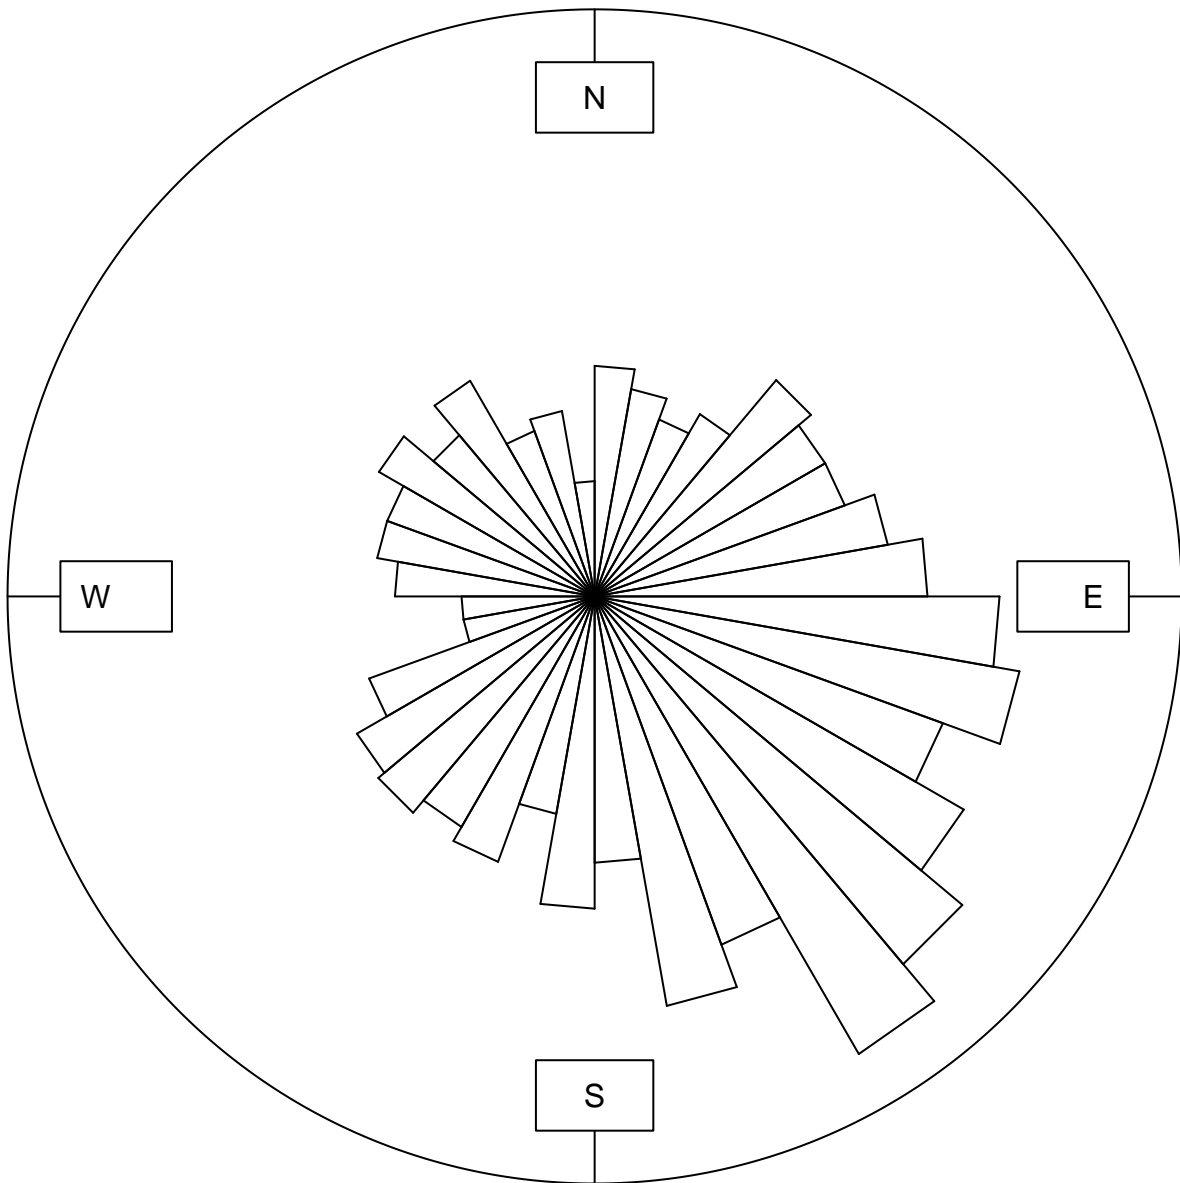

**bootstrap 549**

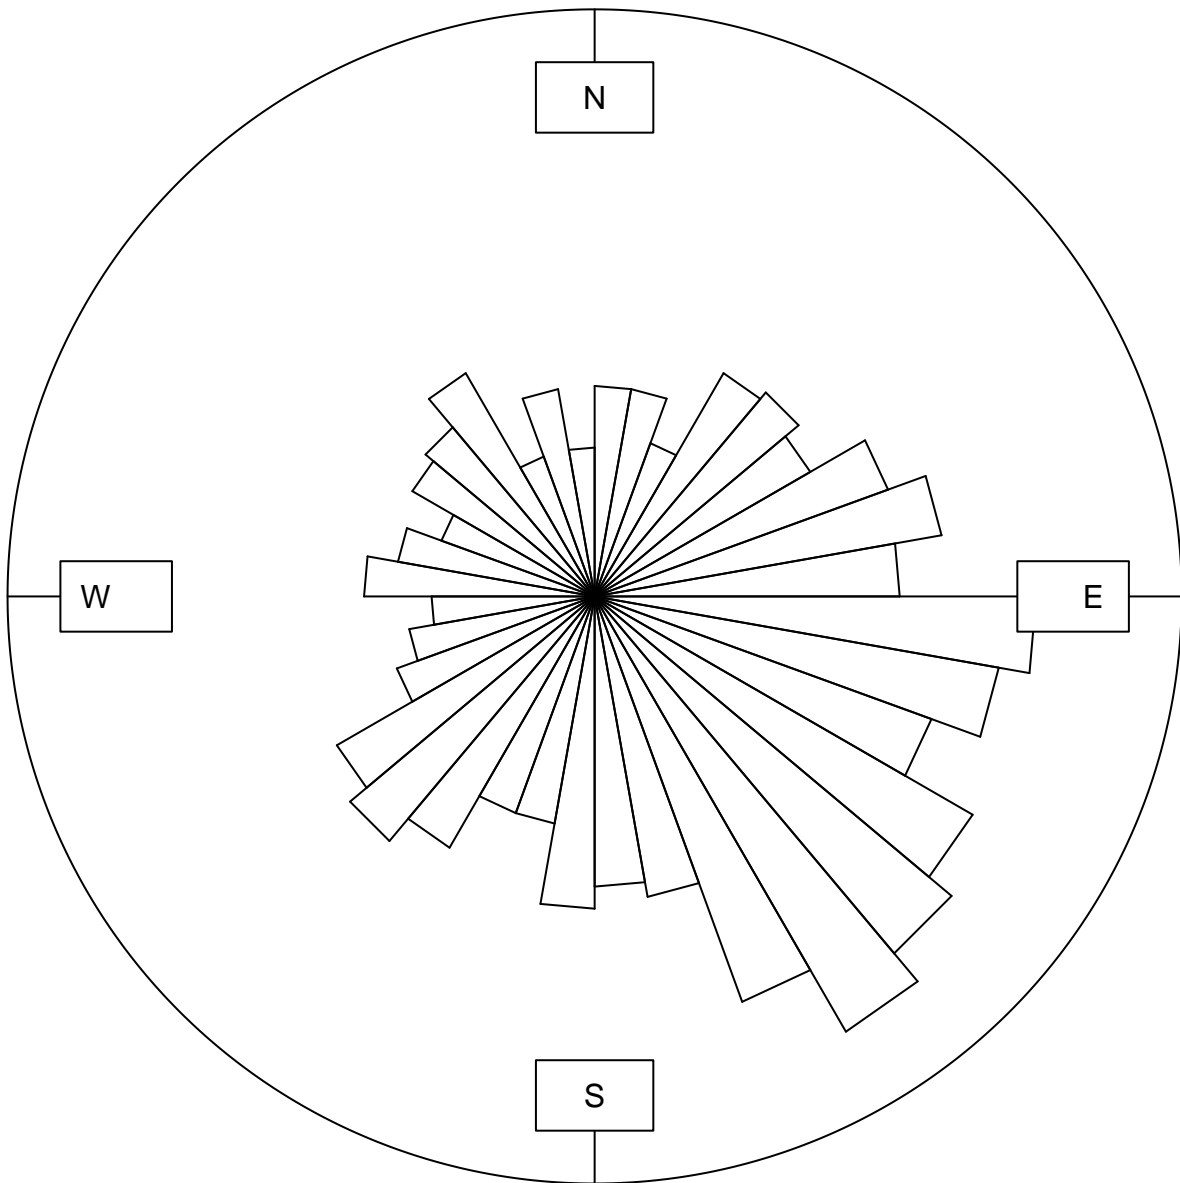

# bootstrap 550

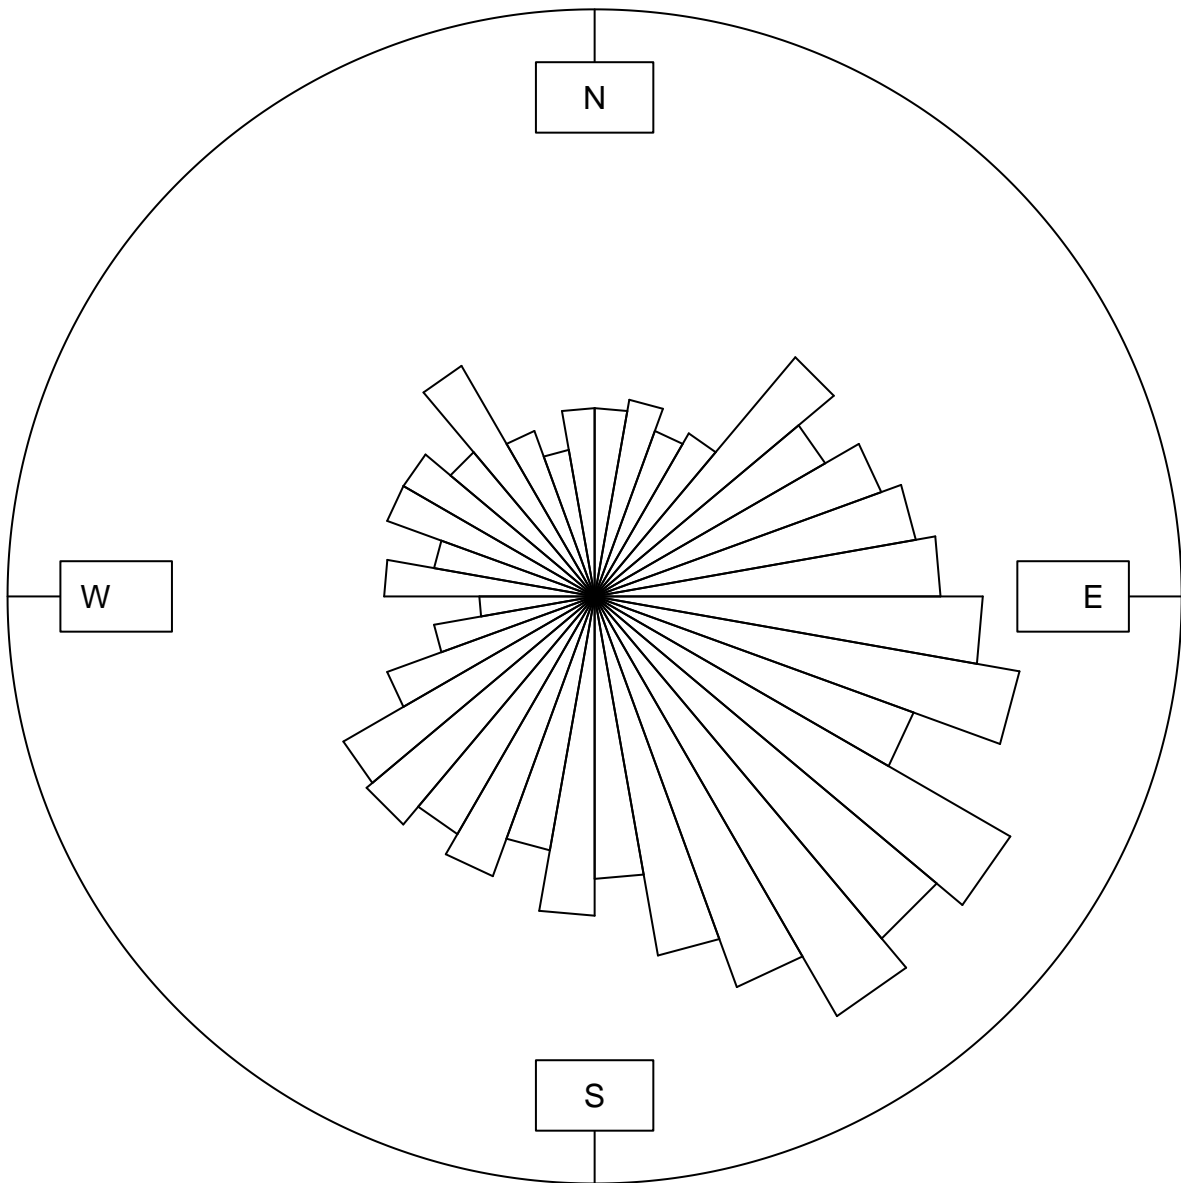

# bootstrap 551

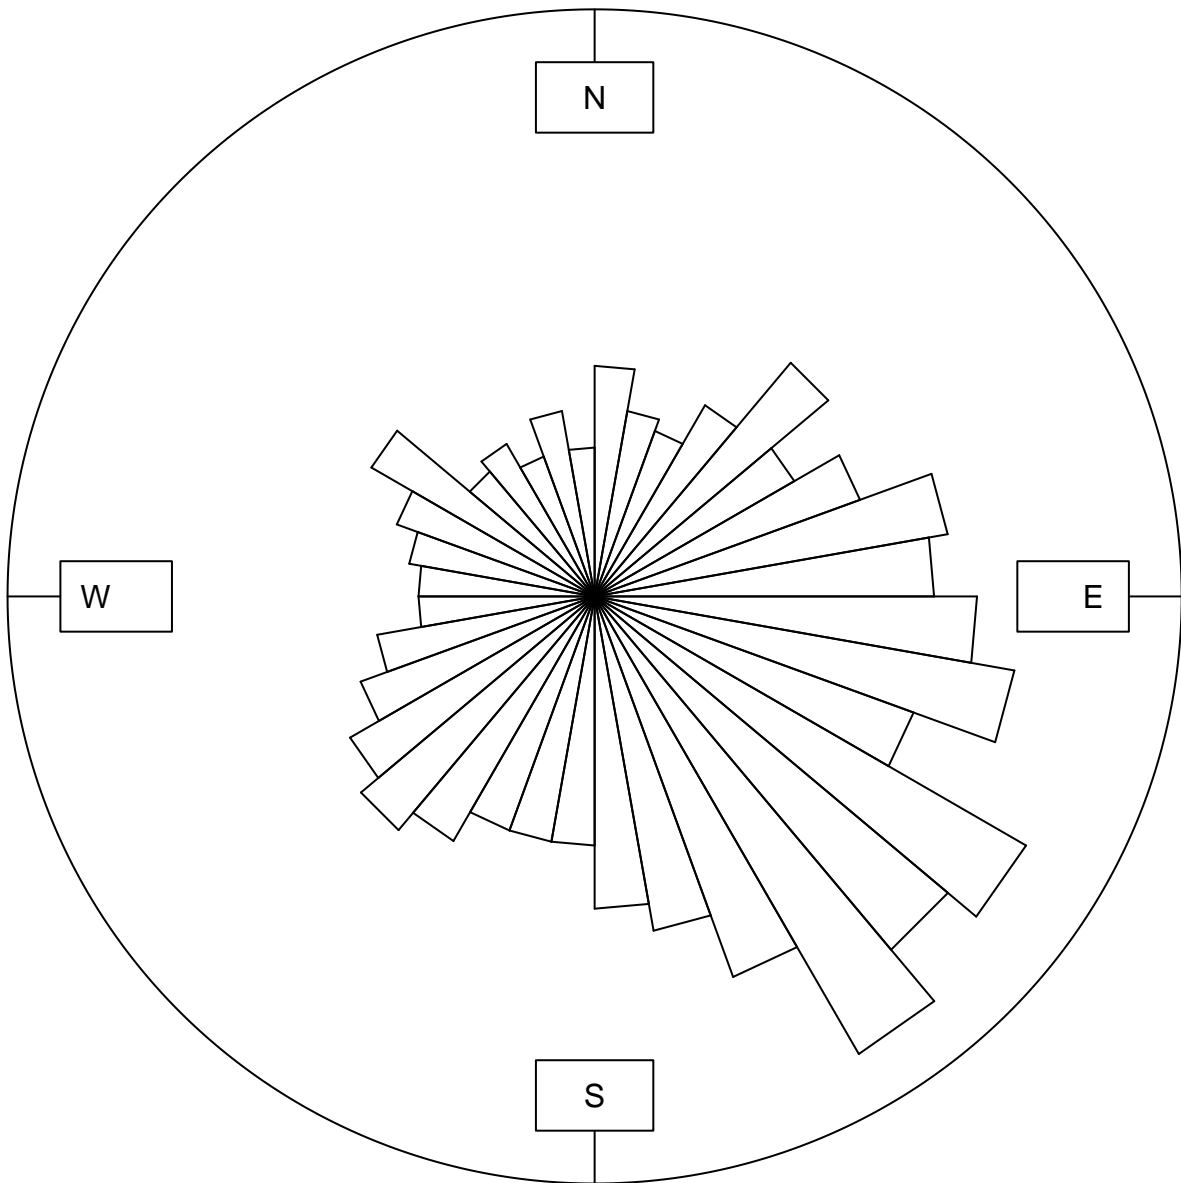

# bootstrap 552

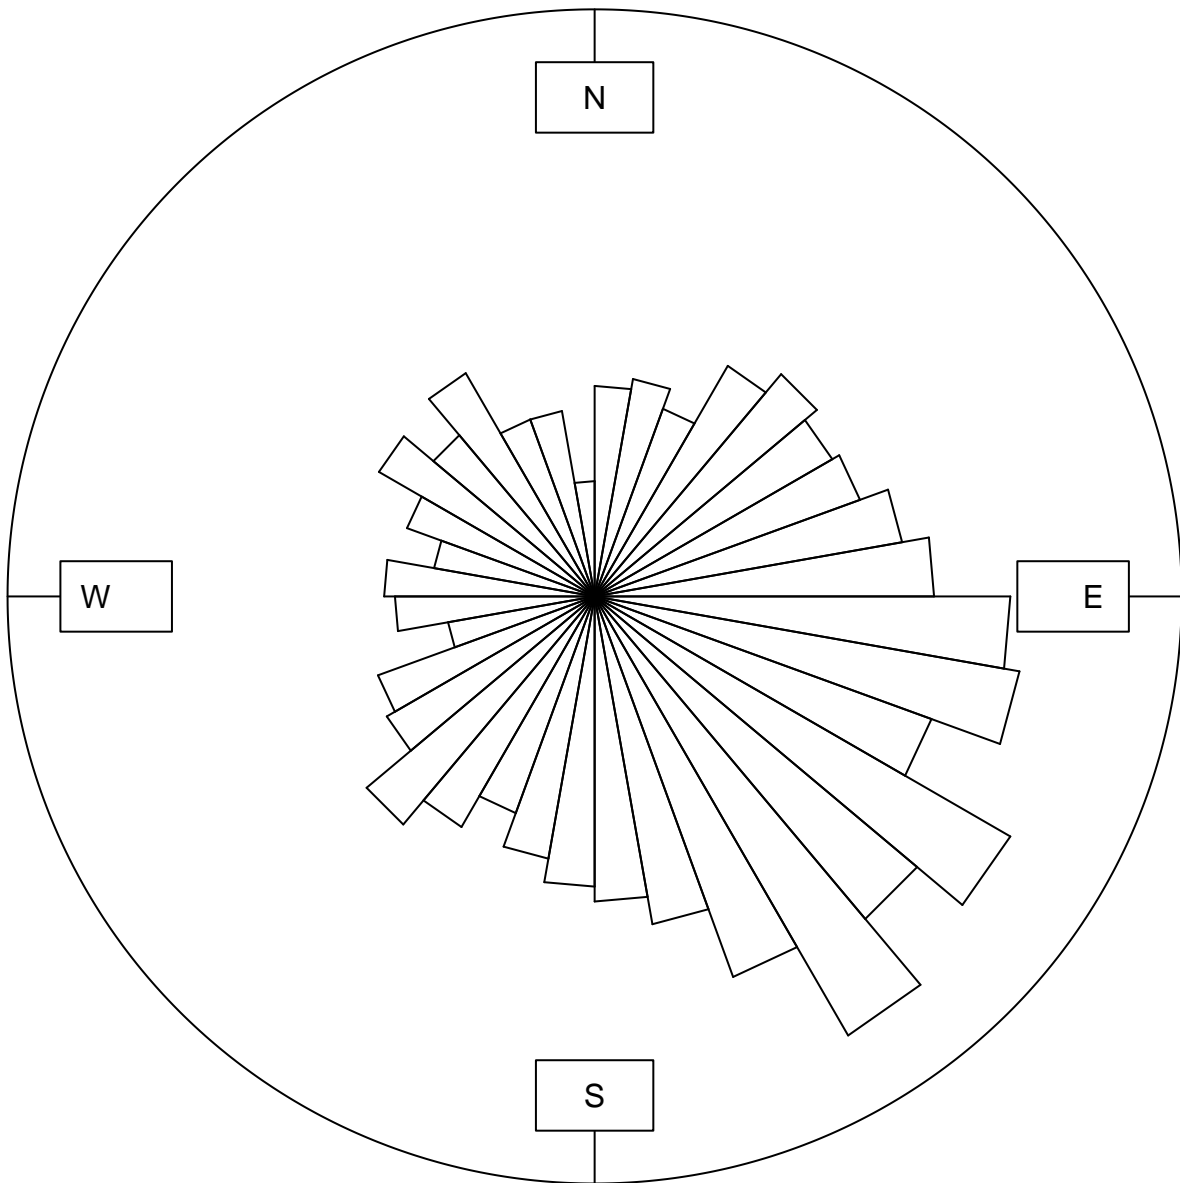



# bootstrap 553

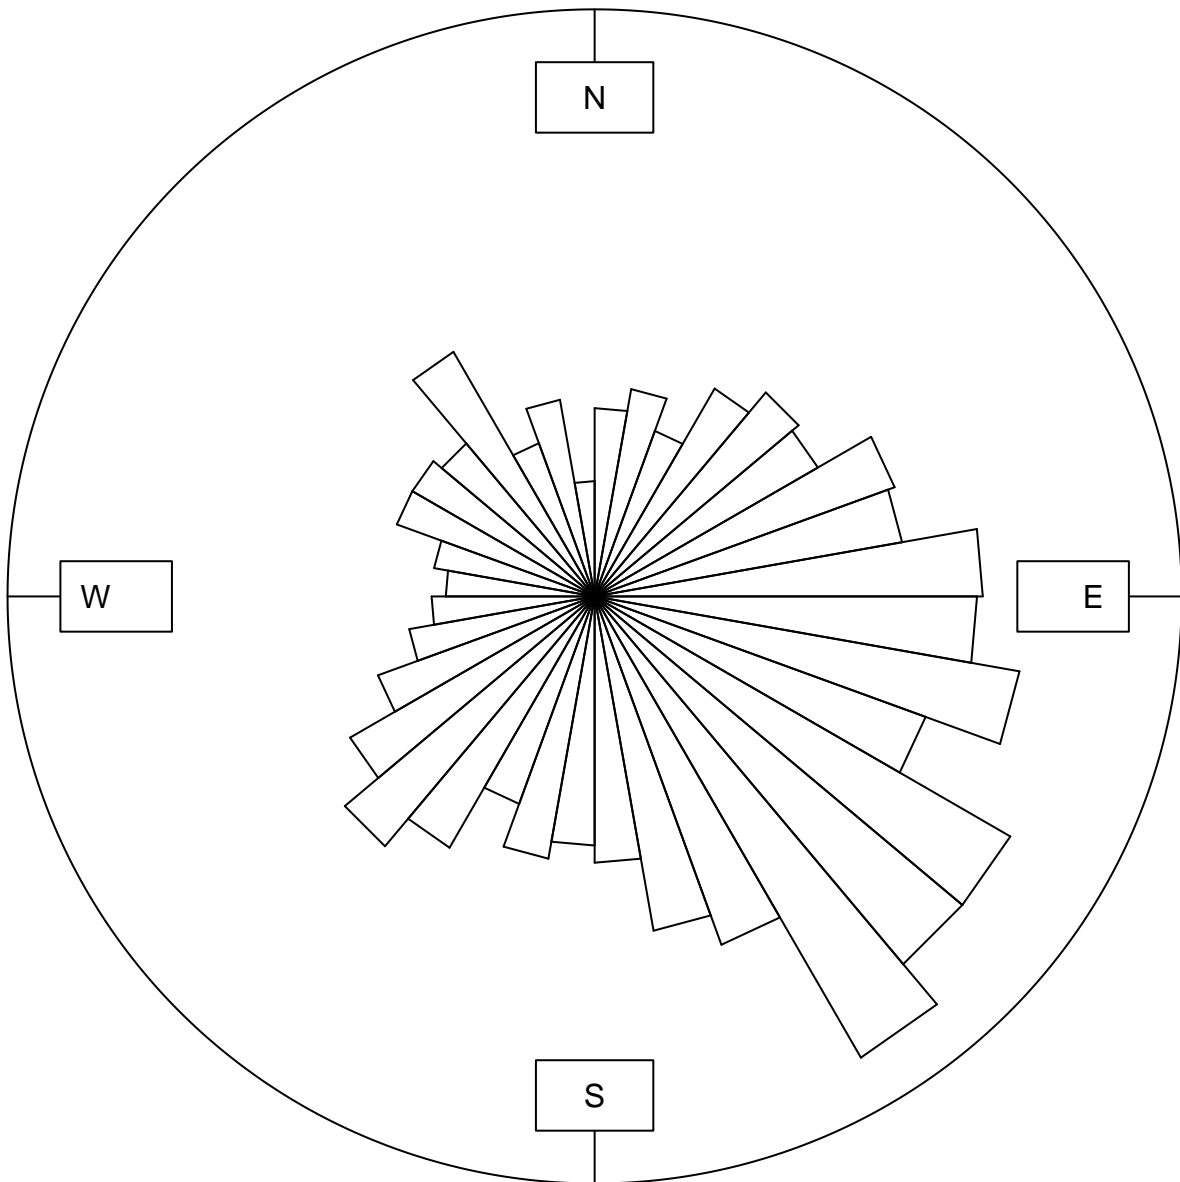

# bootstrap 554

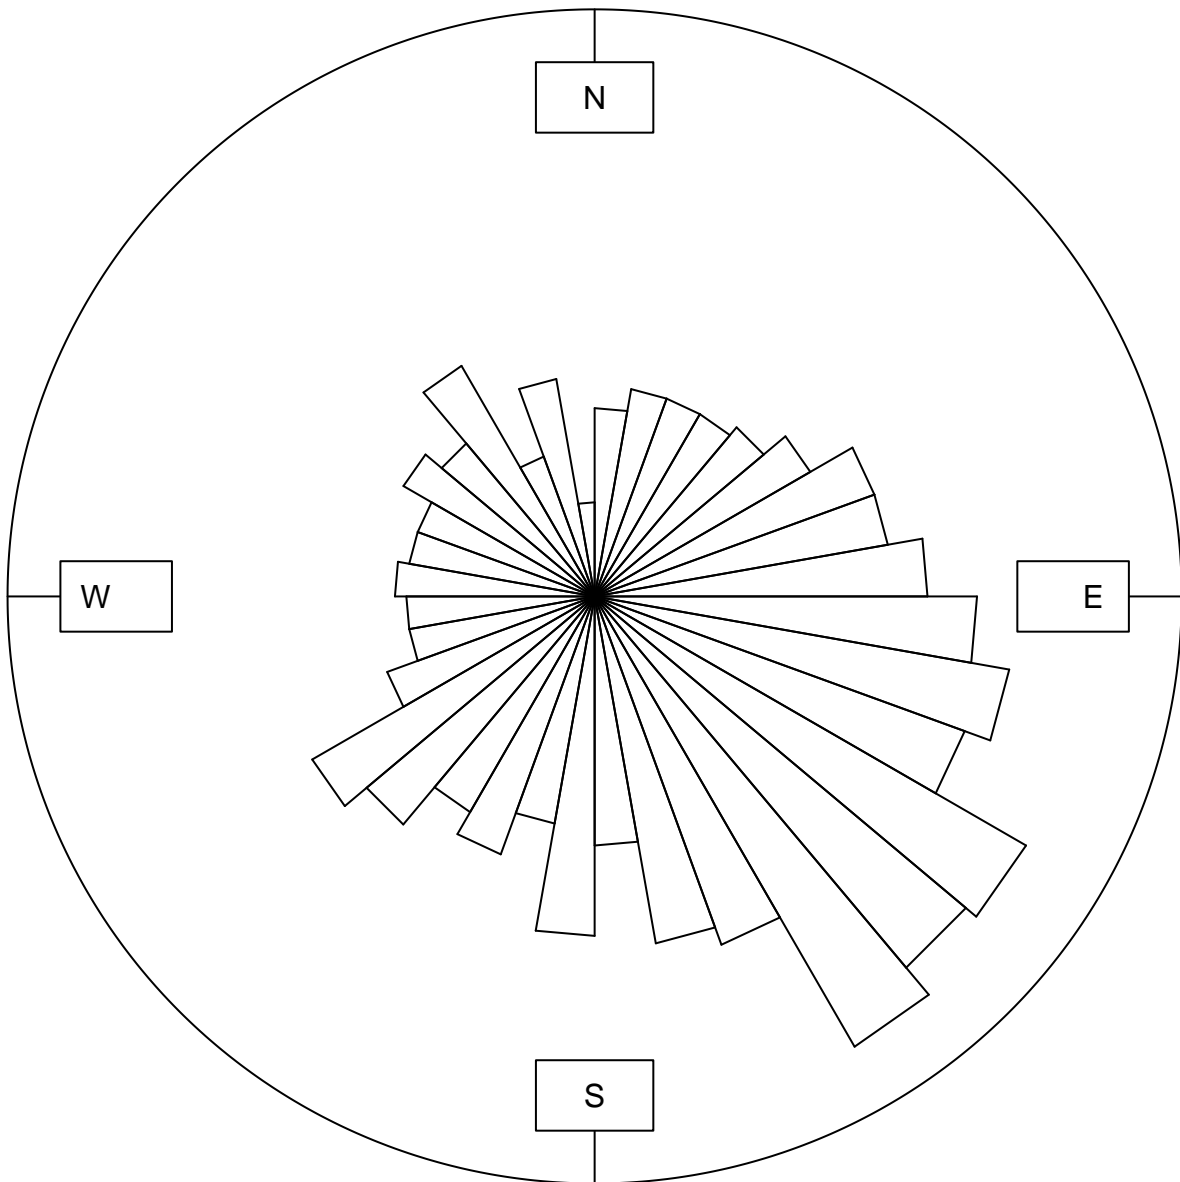

# bootstrap 555

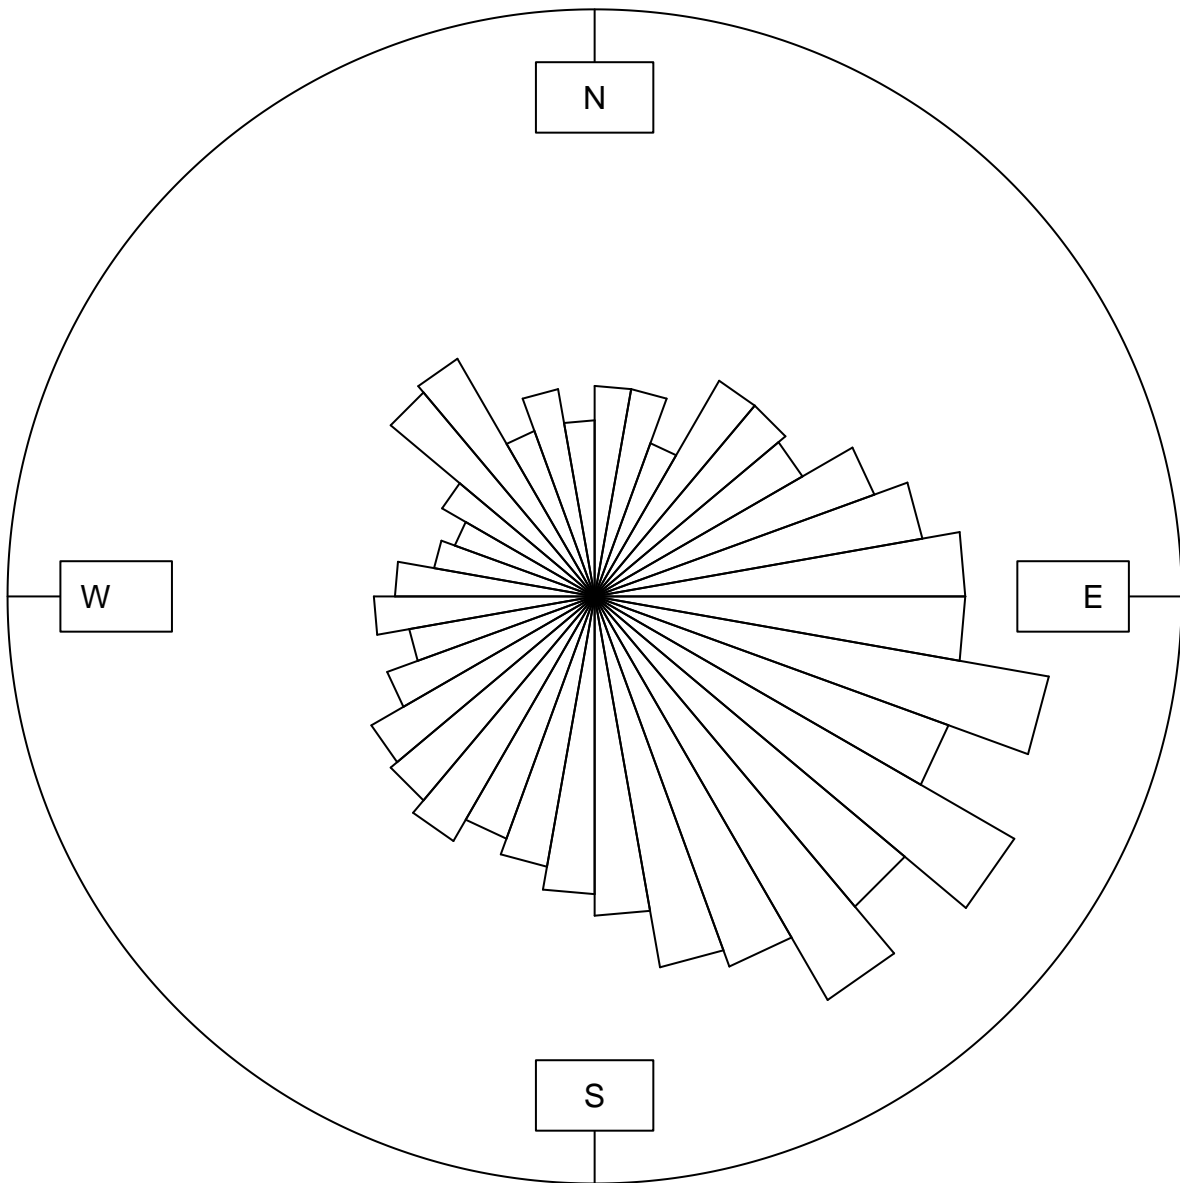

# bootstrap 556

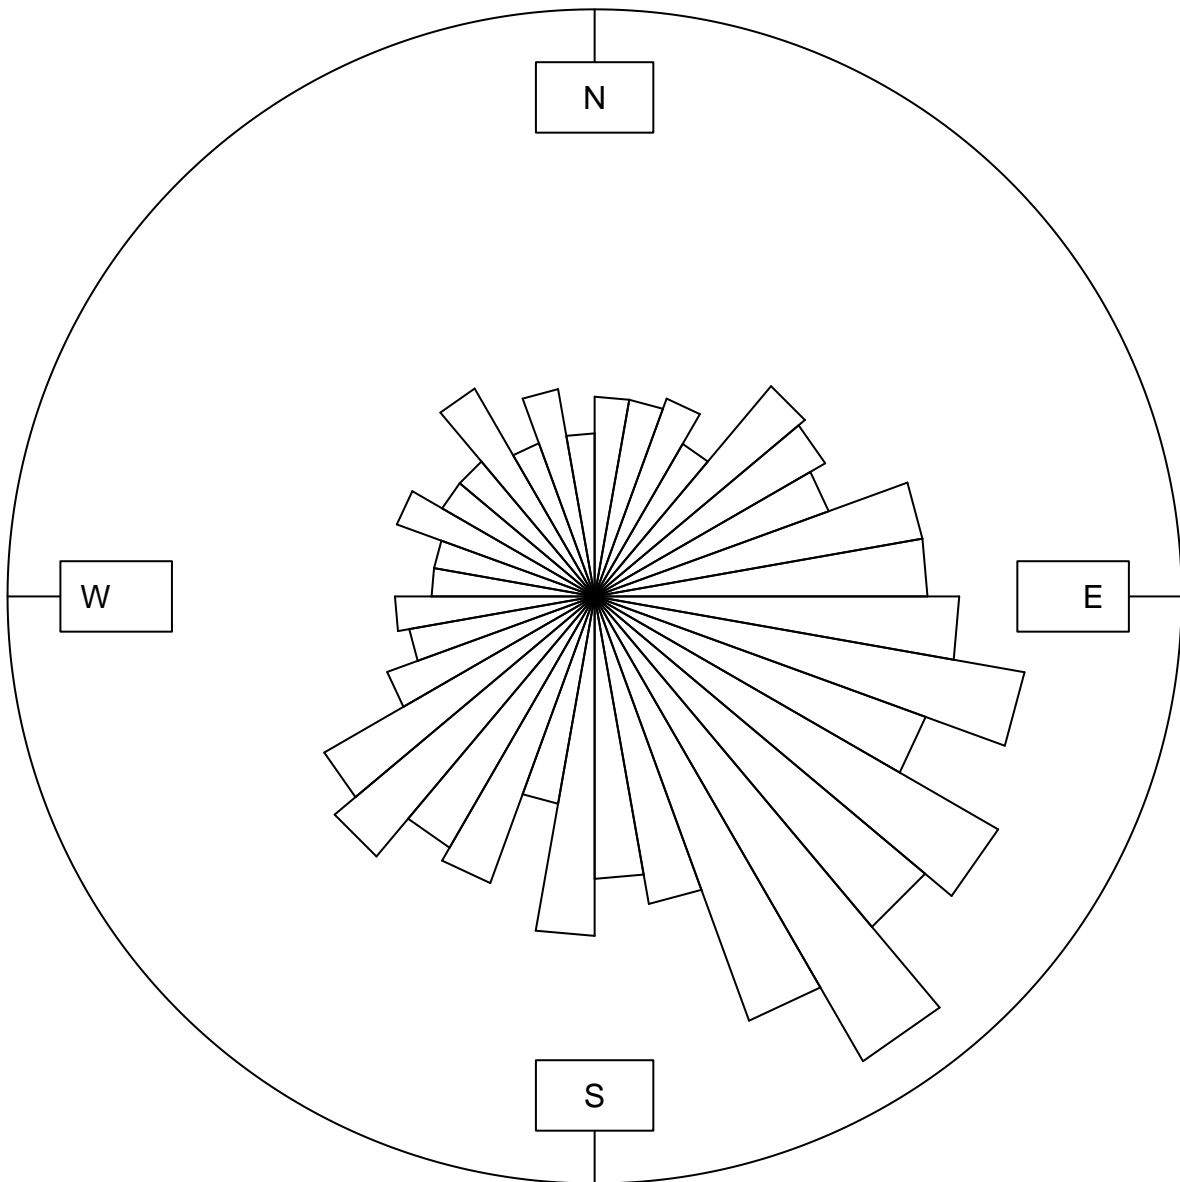

# bootstrap 557

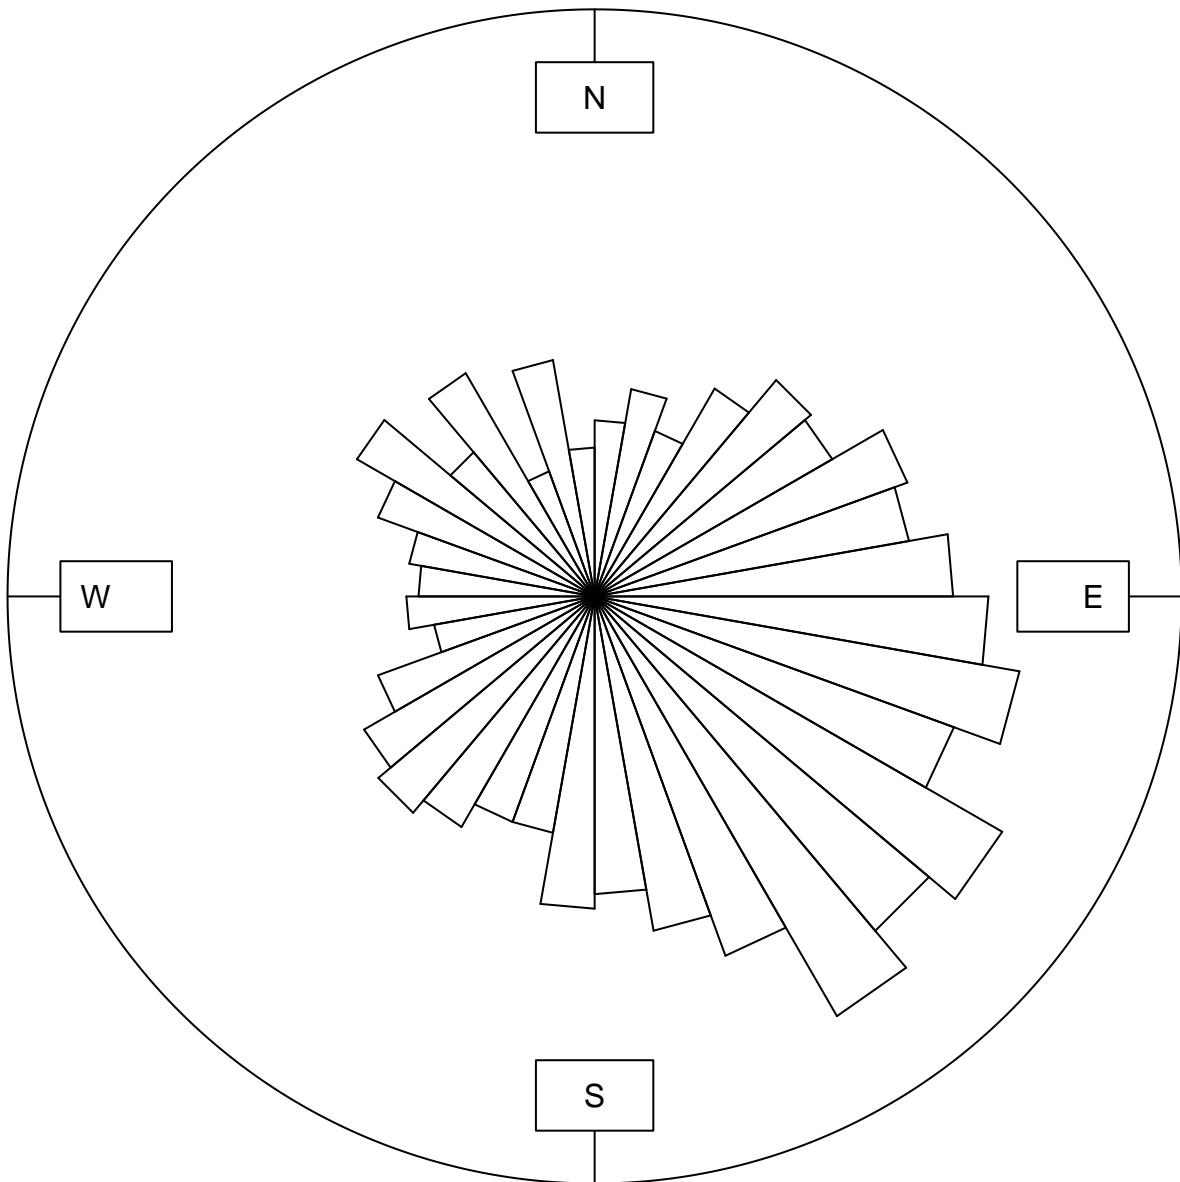

# bootstrap 558

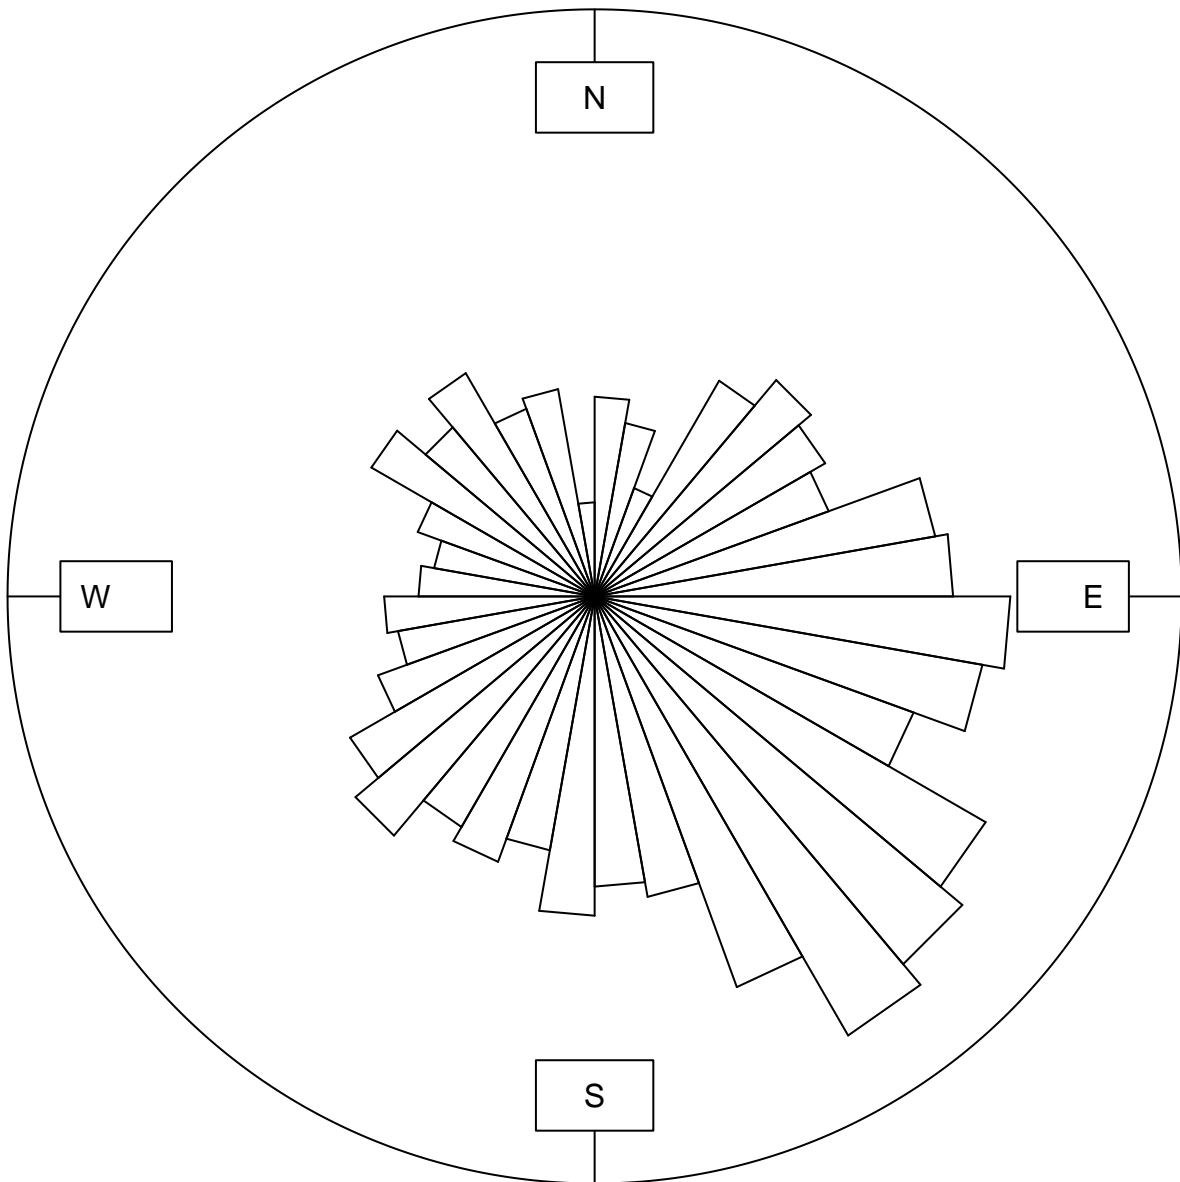

# bootstrap 559

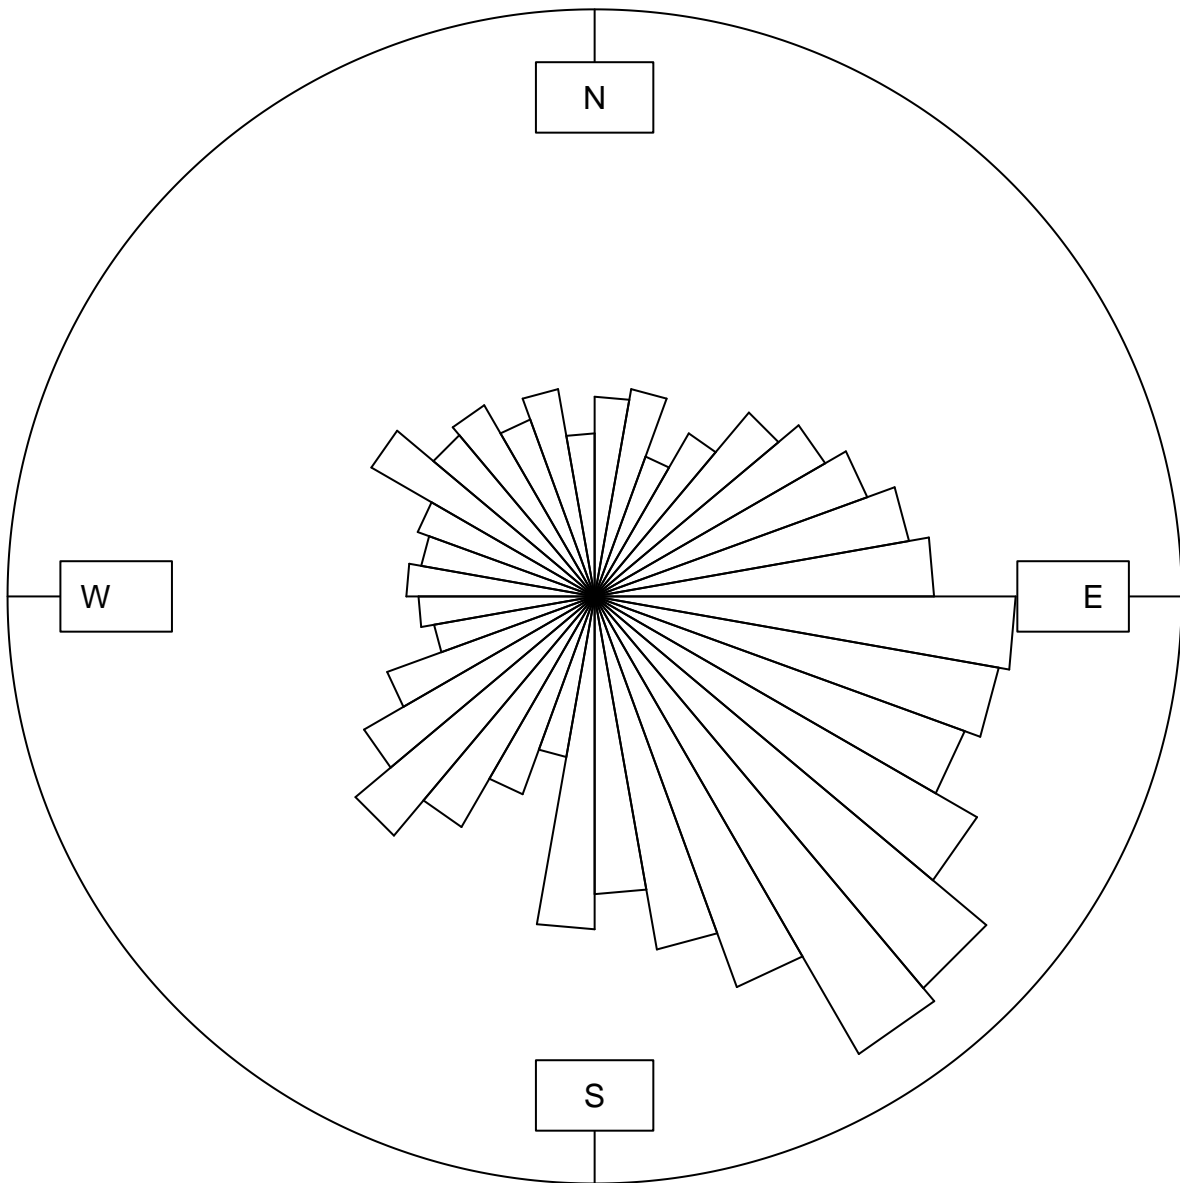

# bootstrap 560

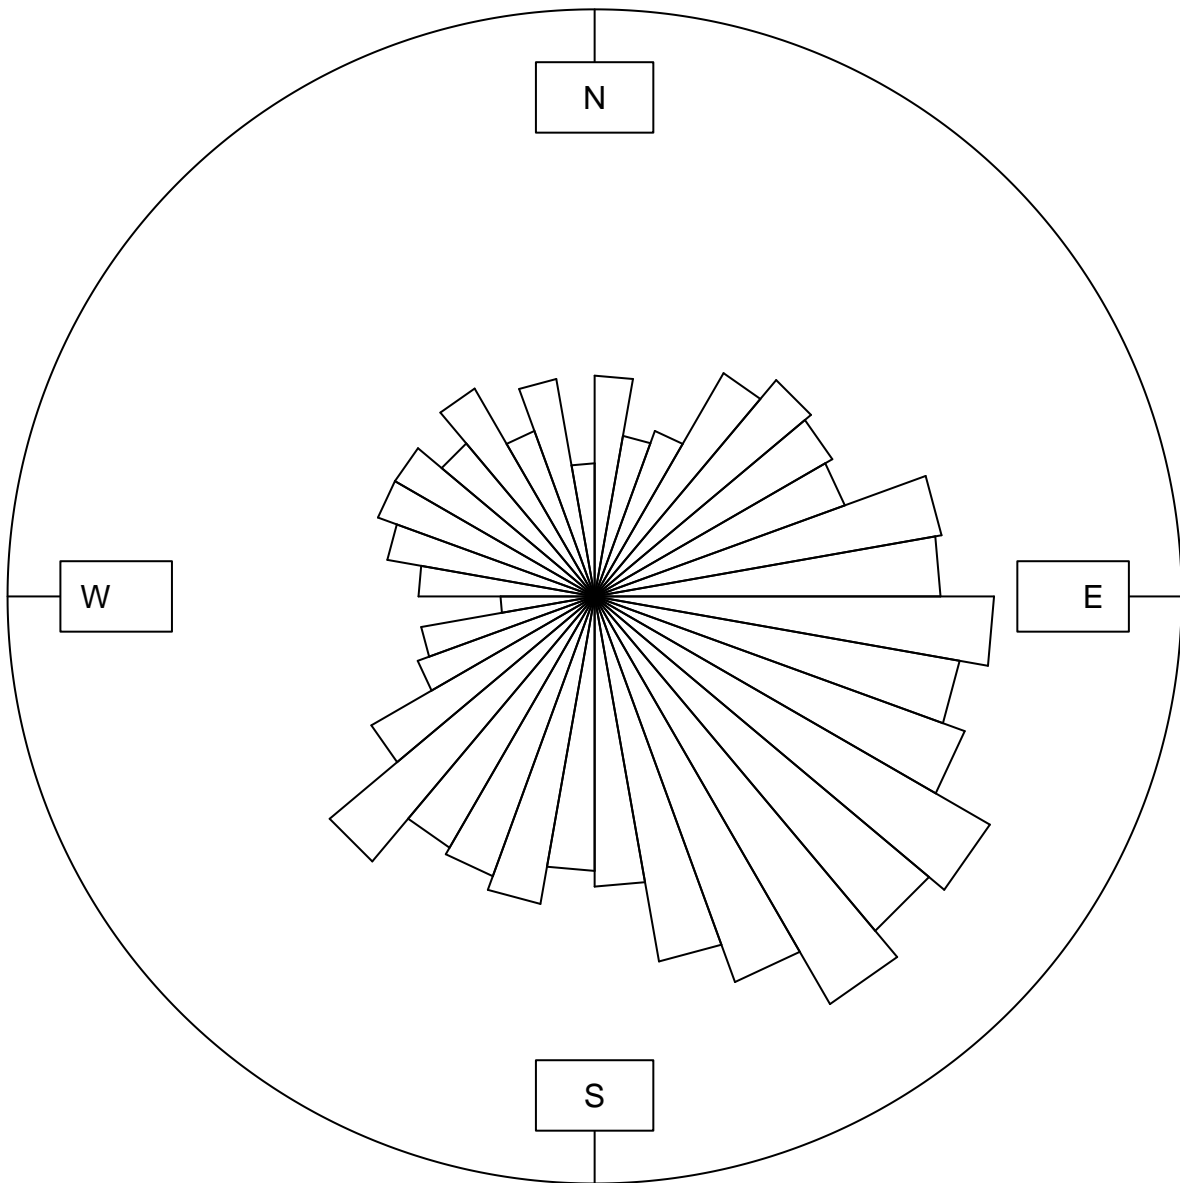



# bootstrap 561

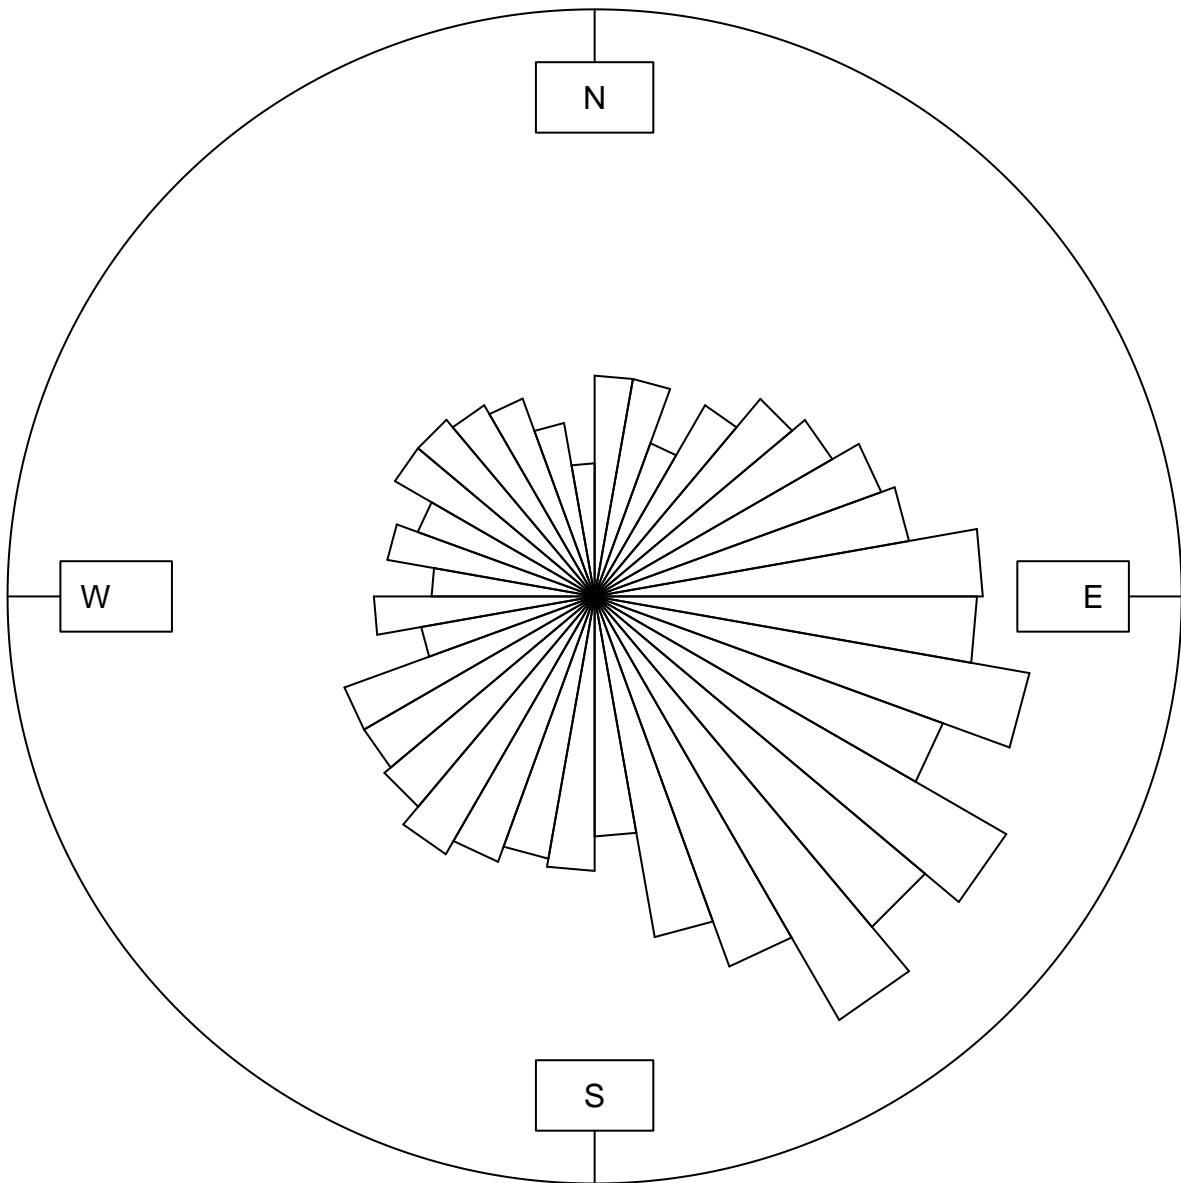

# bootstrap 562

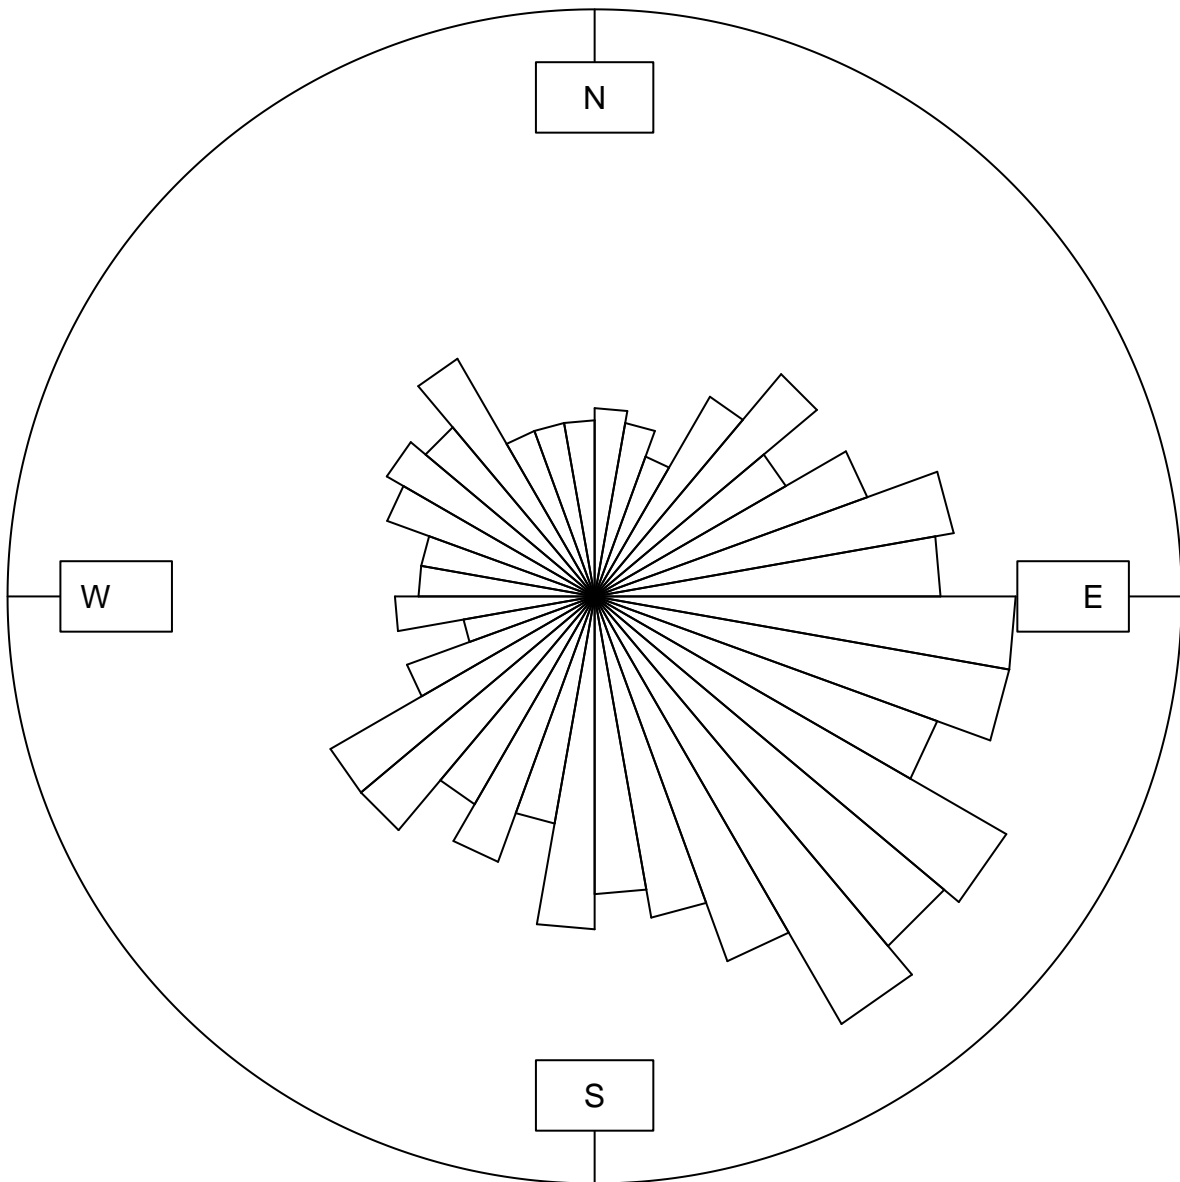

# bootstrap 563

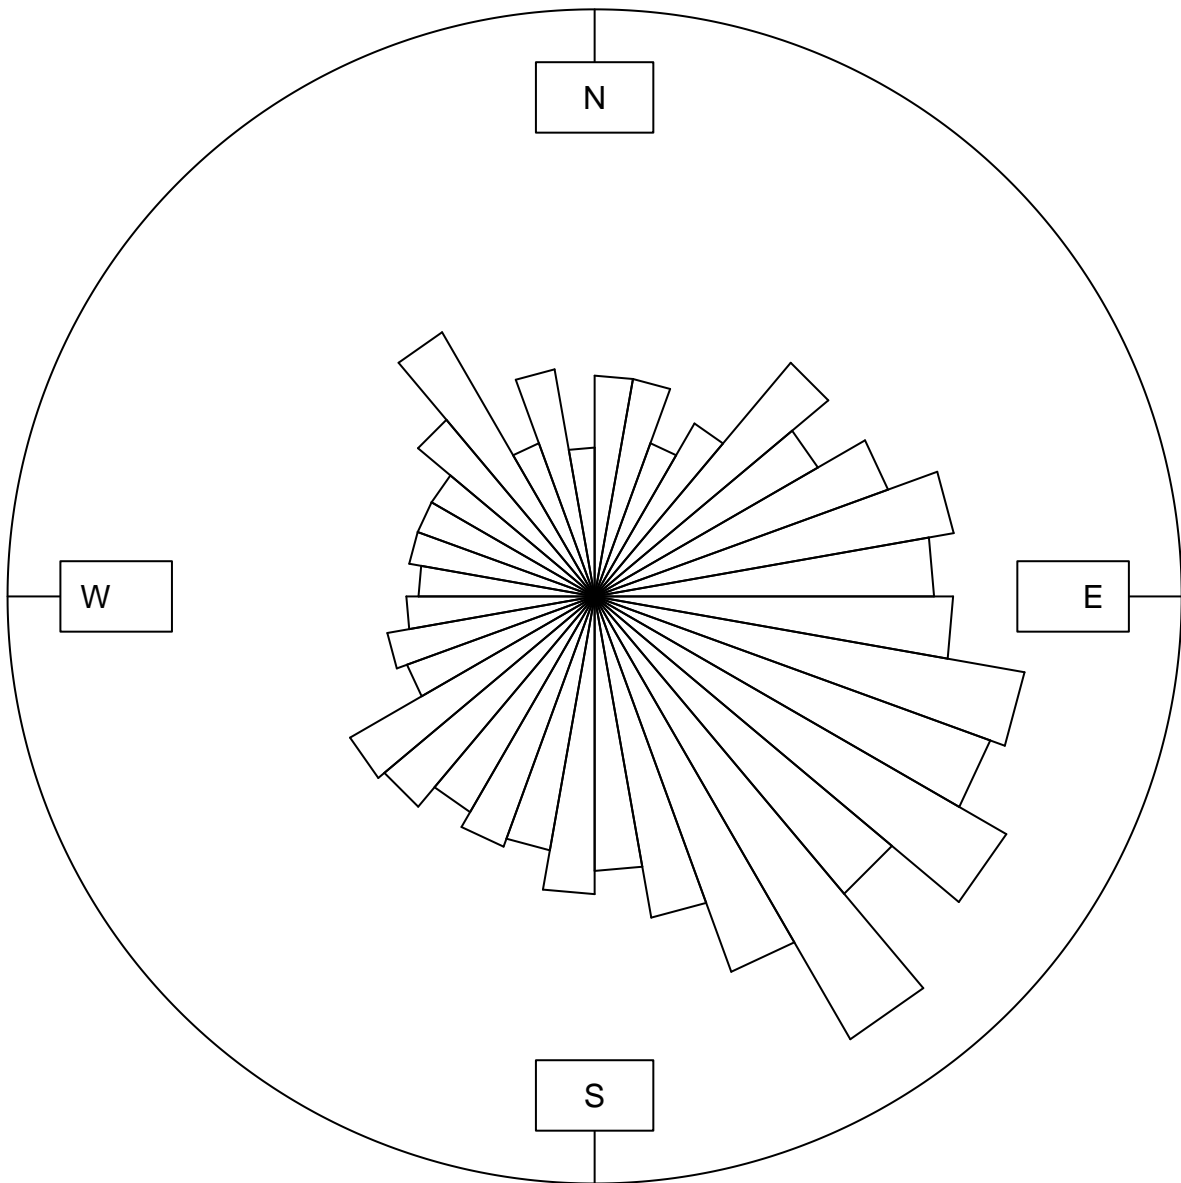

# bootstrap 564

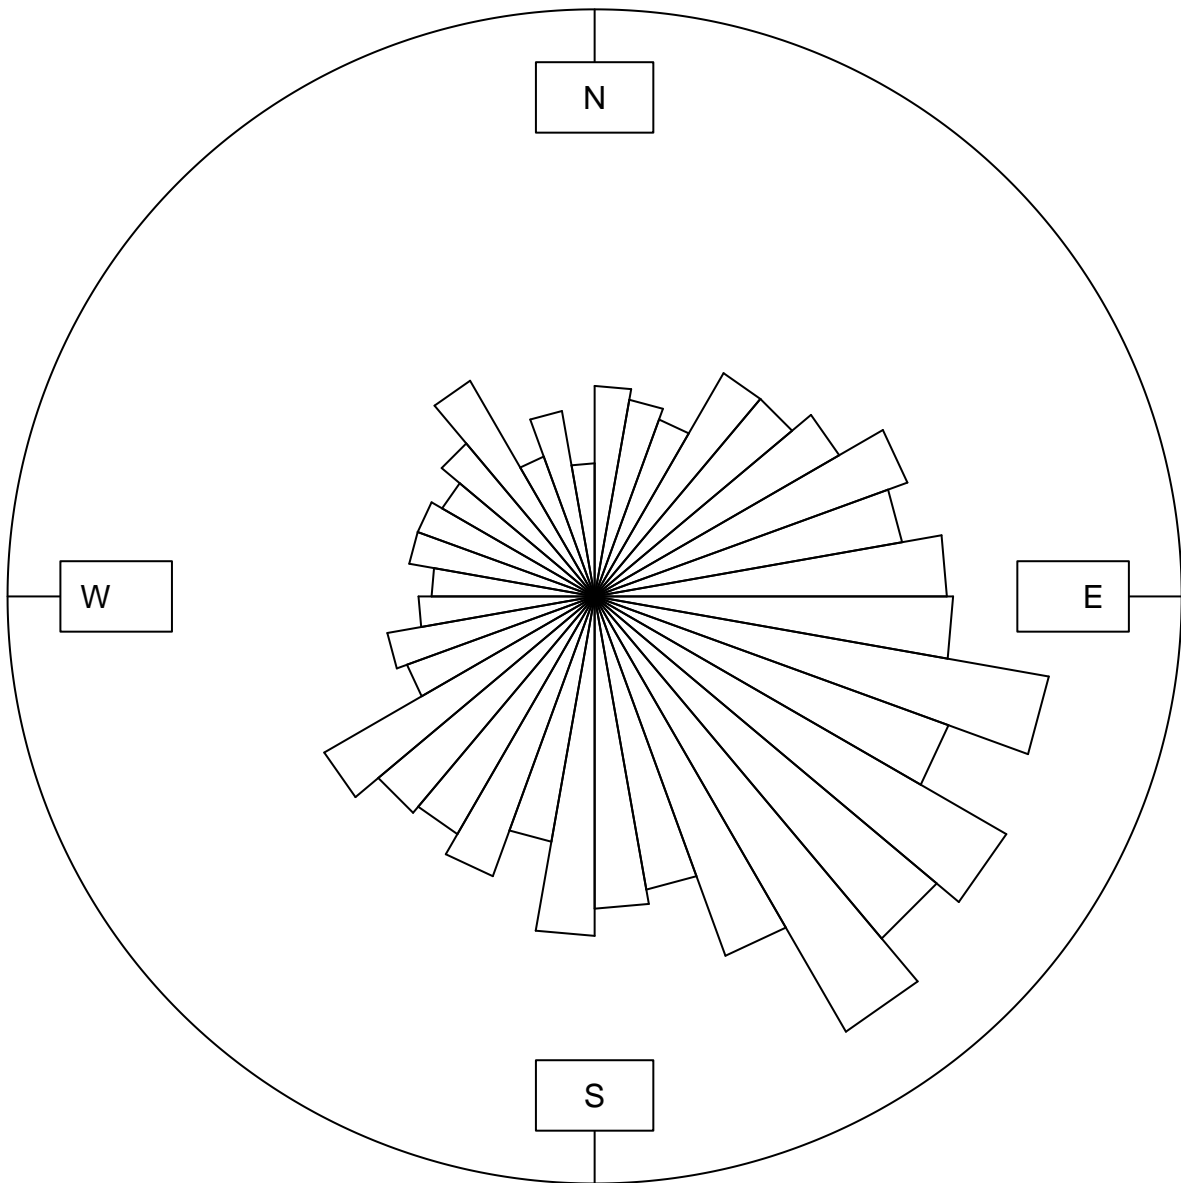

# bootstrap 565

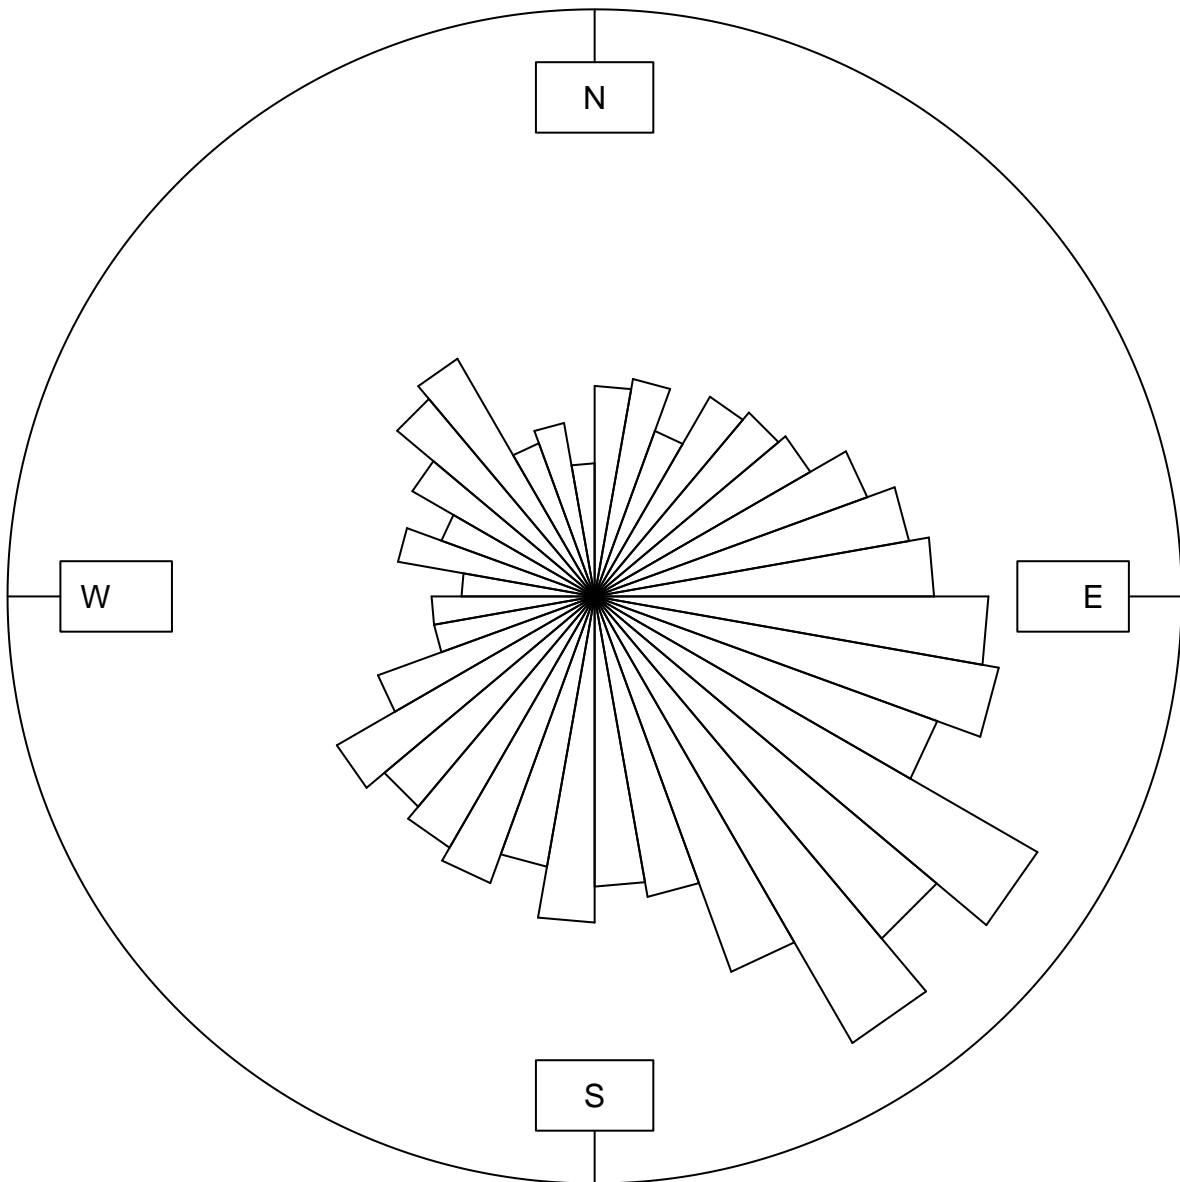

# bootstrap 566

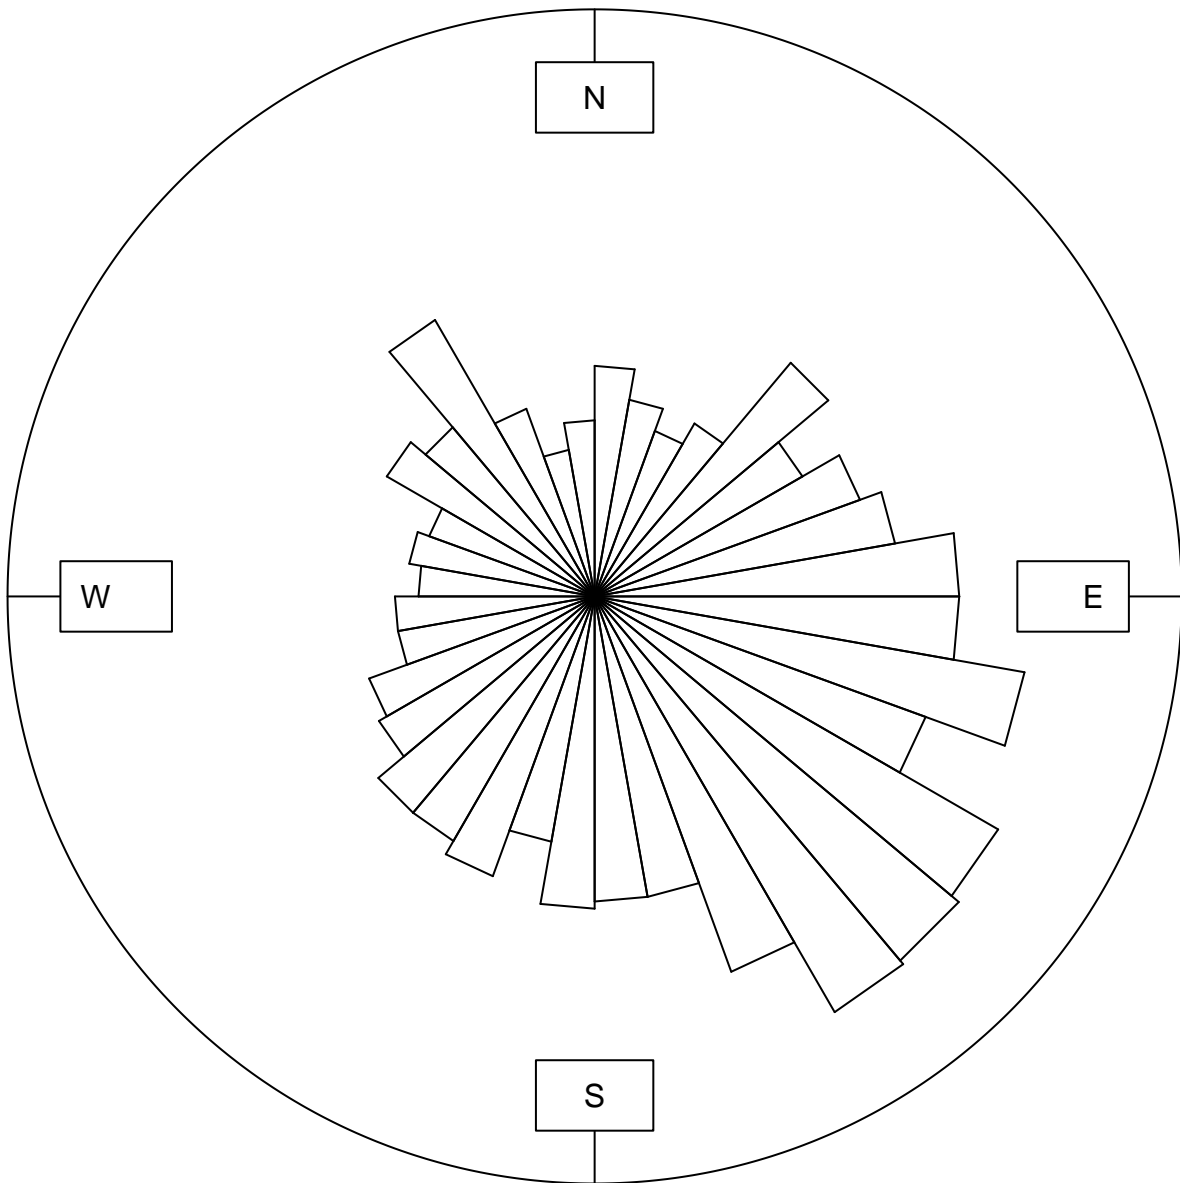

# bootstrap 567

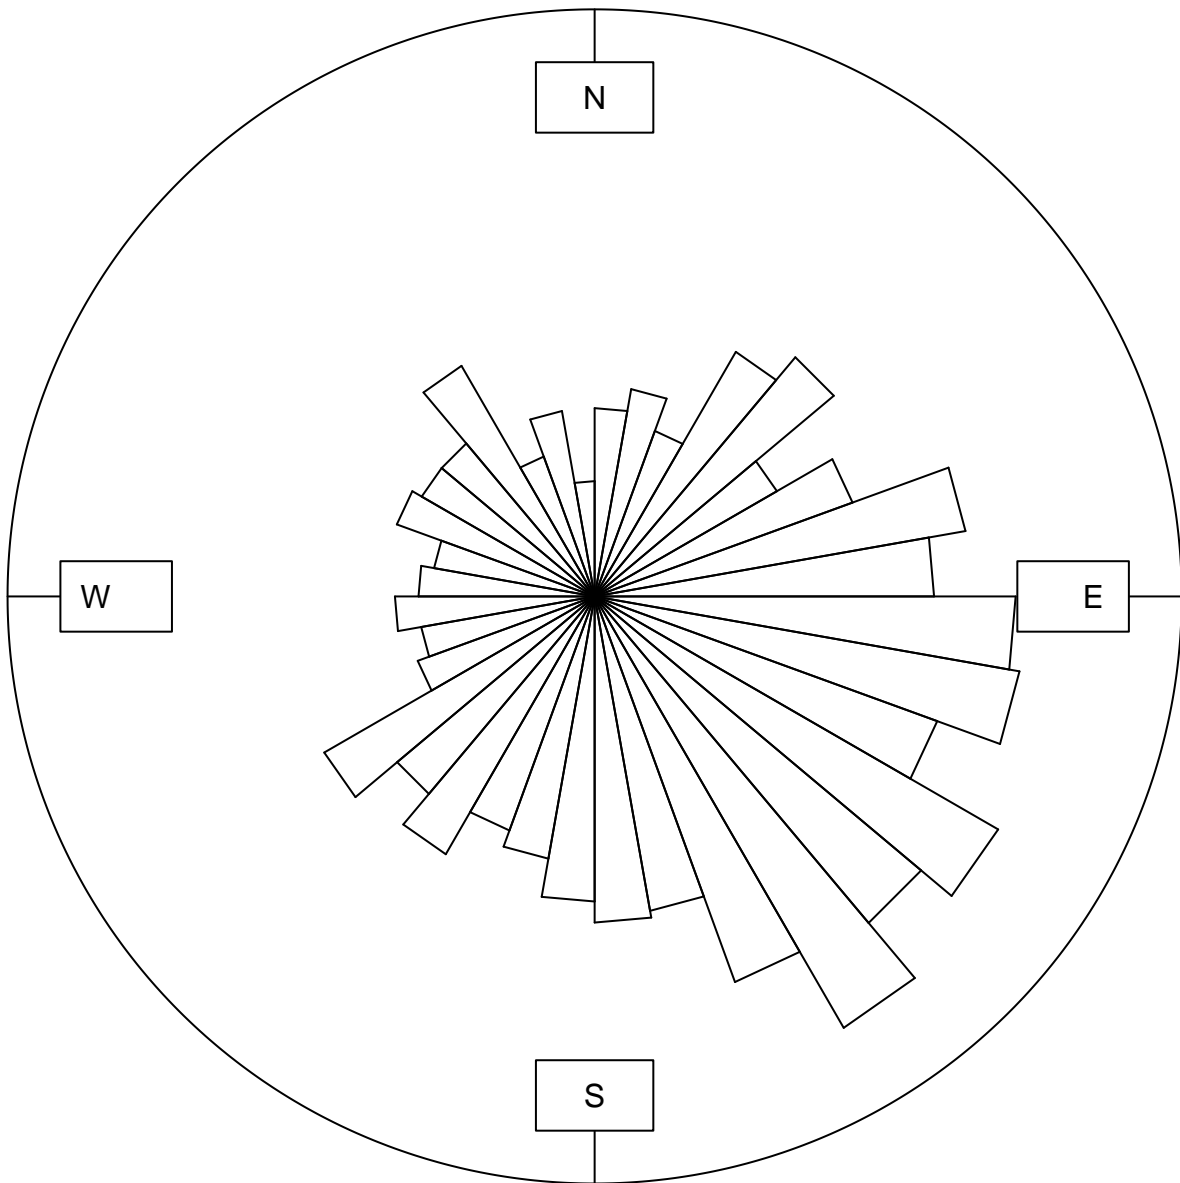

# bootstrap 568

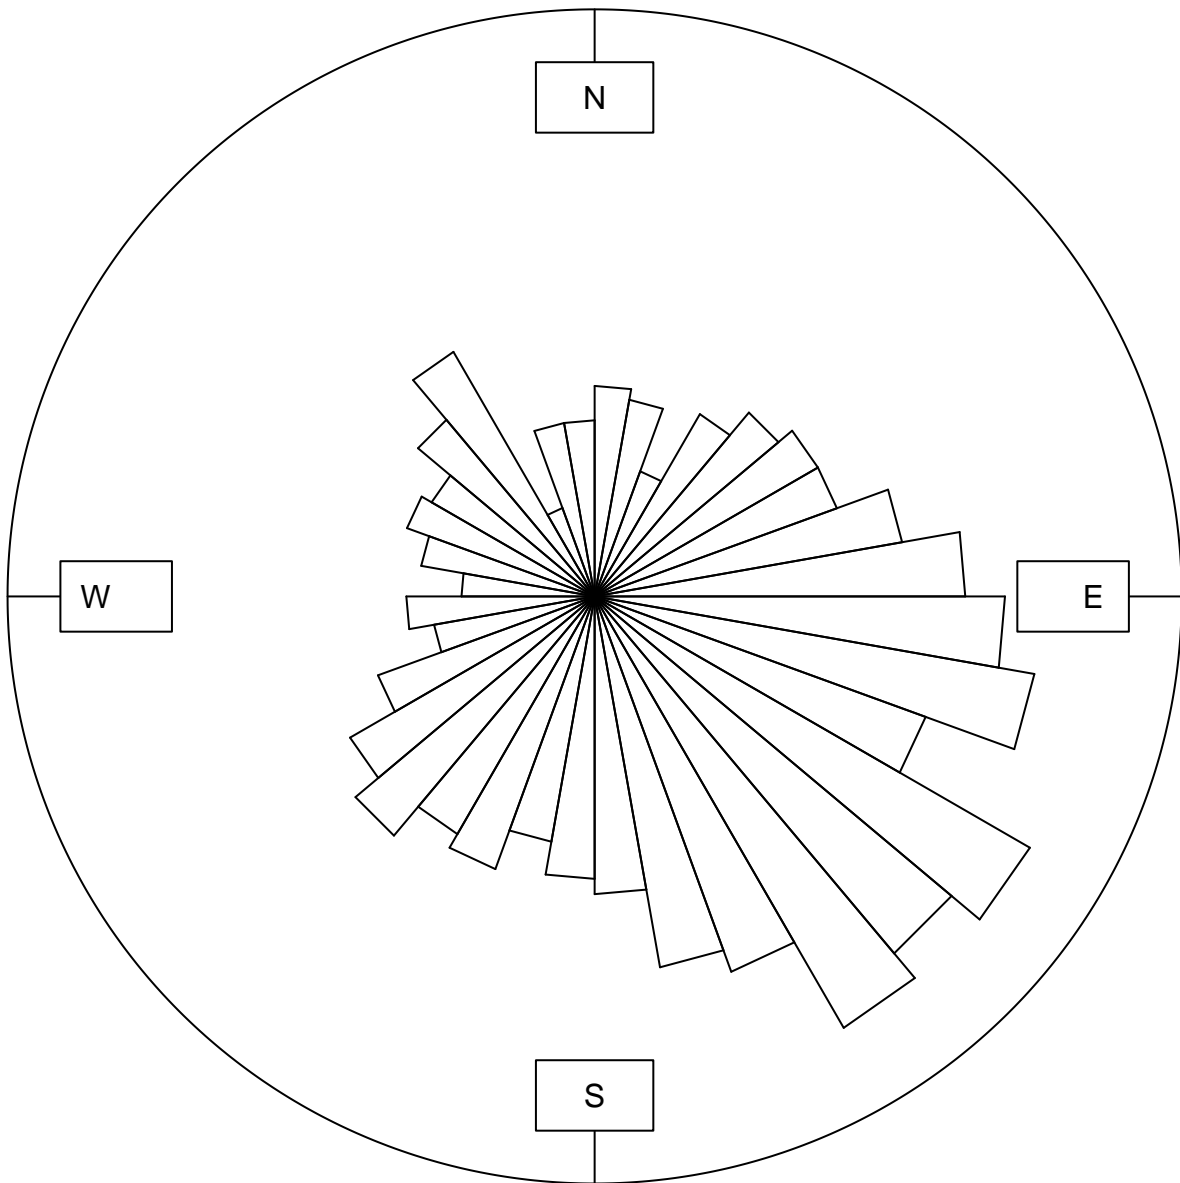



# bootstrap 569

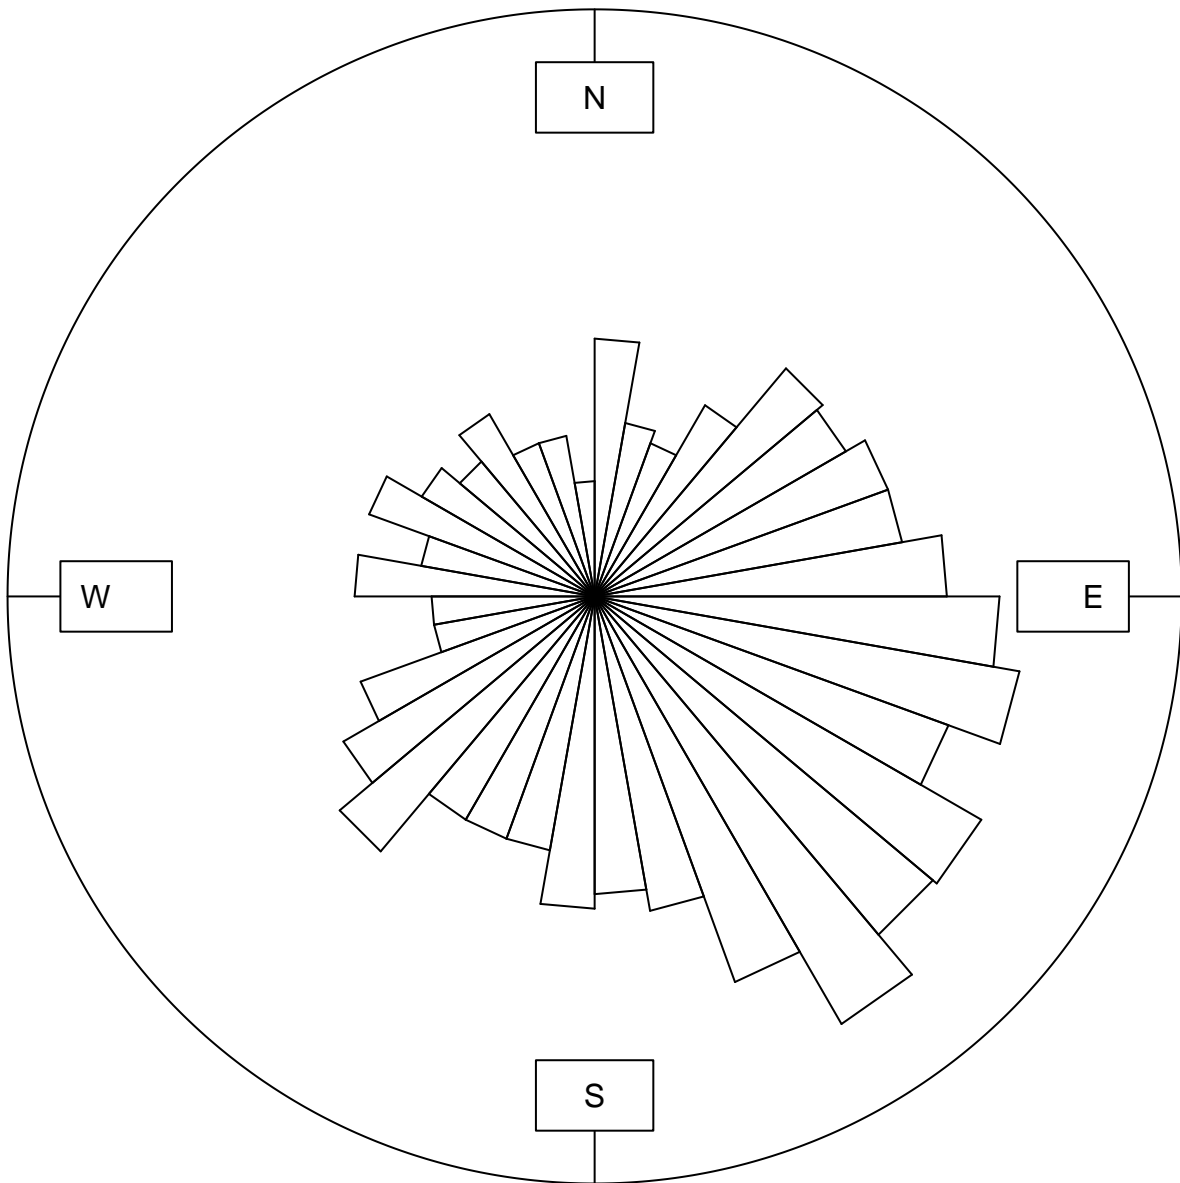

# bootstrap 570

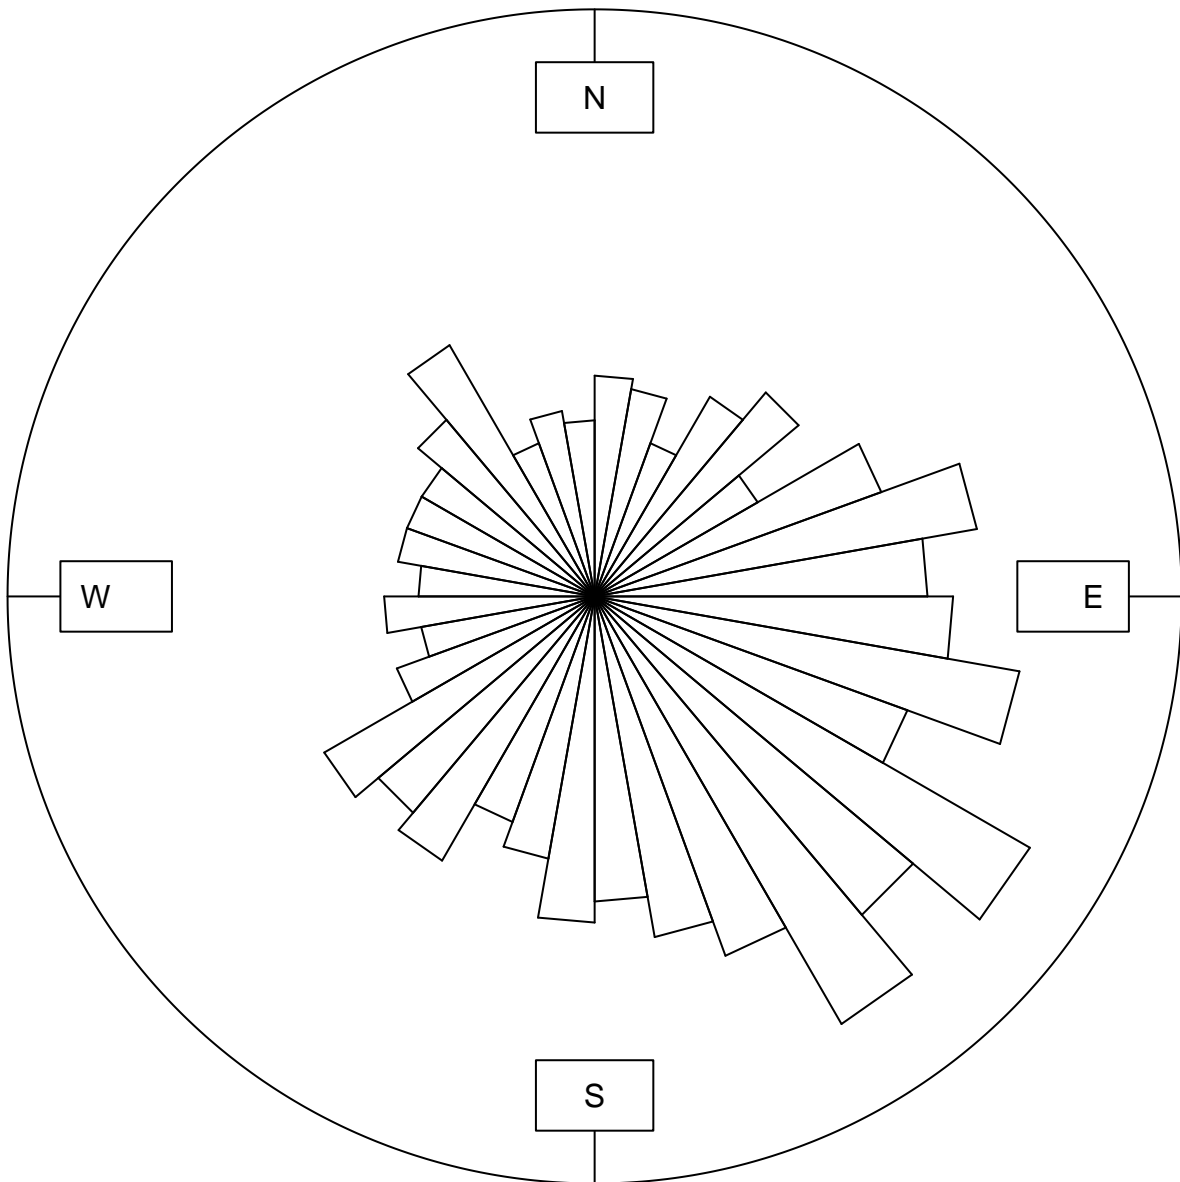

**bootstrap 571**

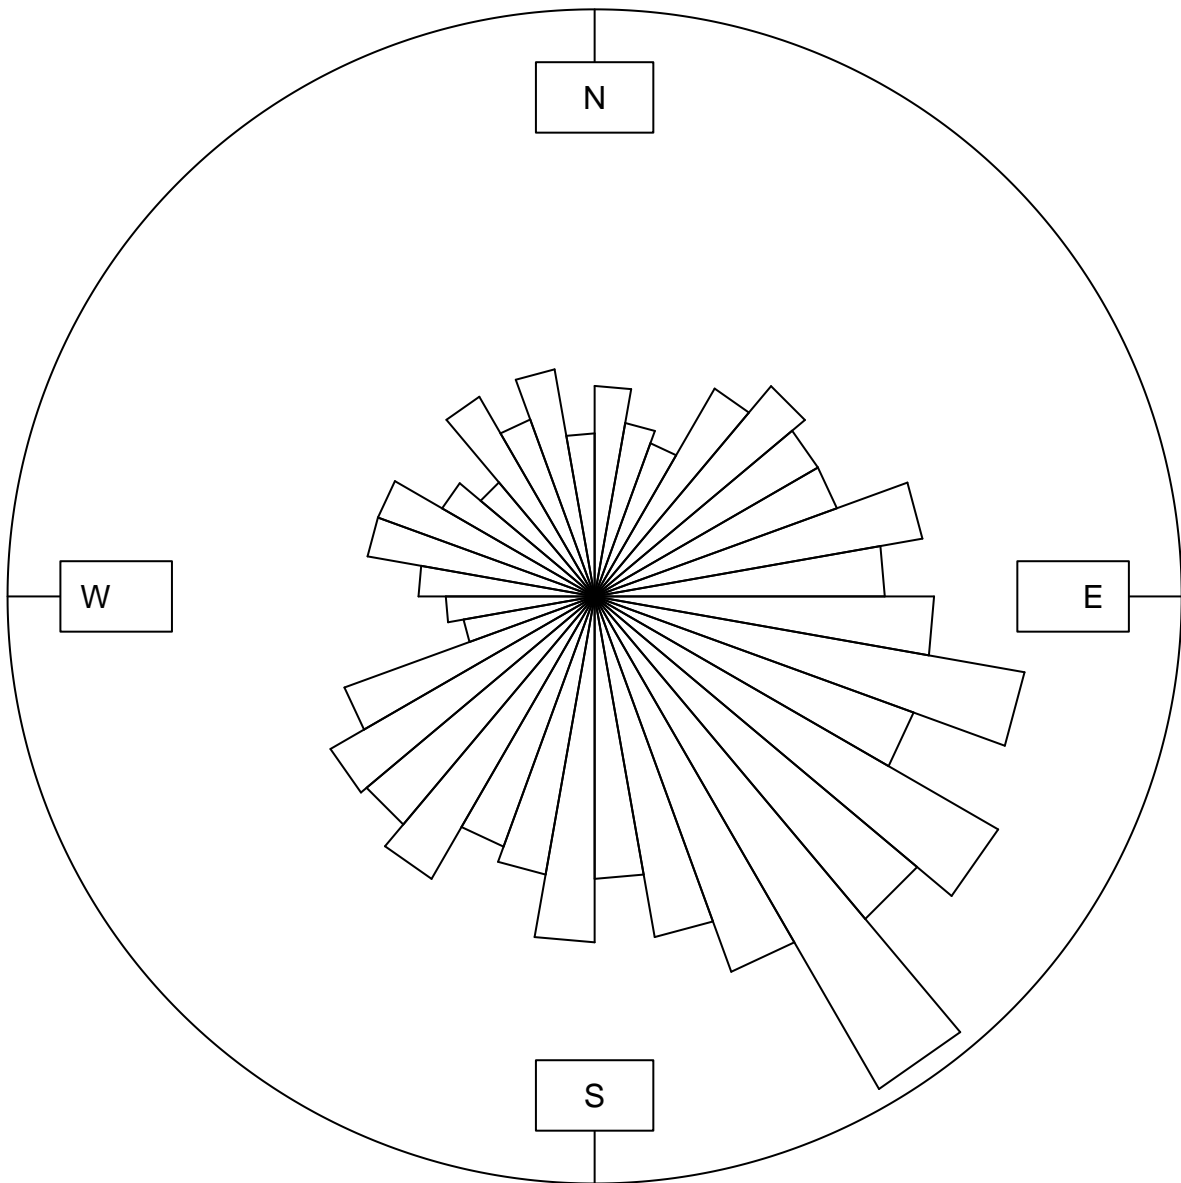

# bootstrap 572

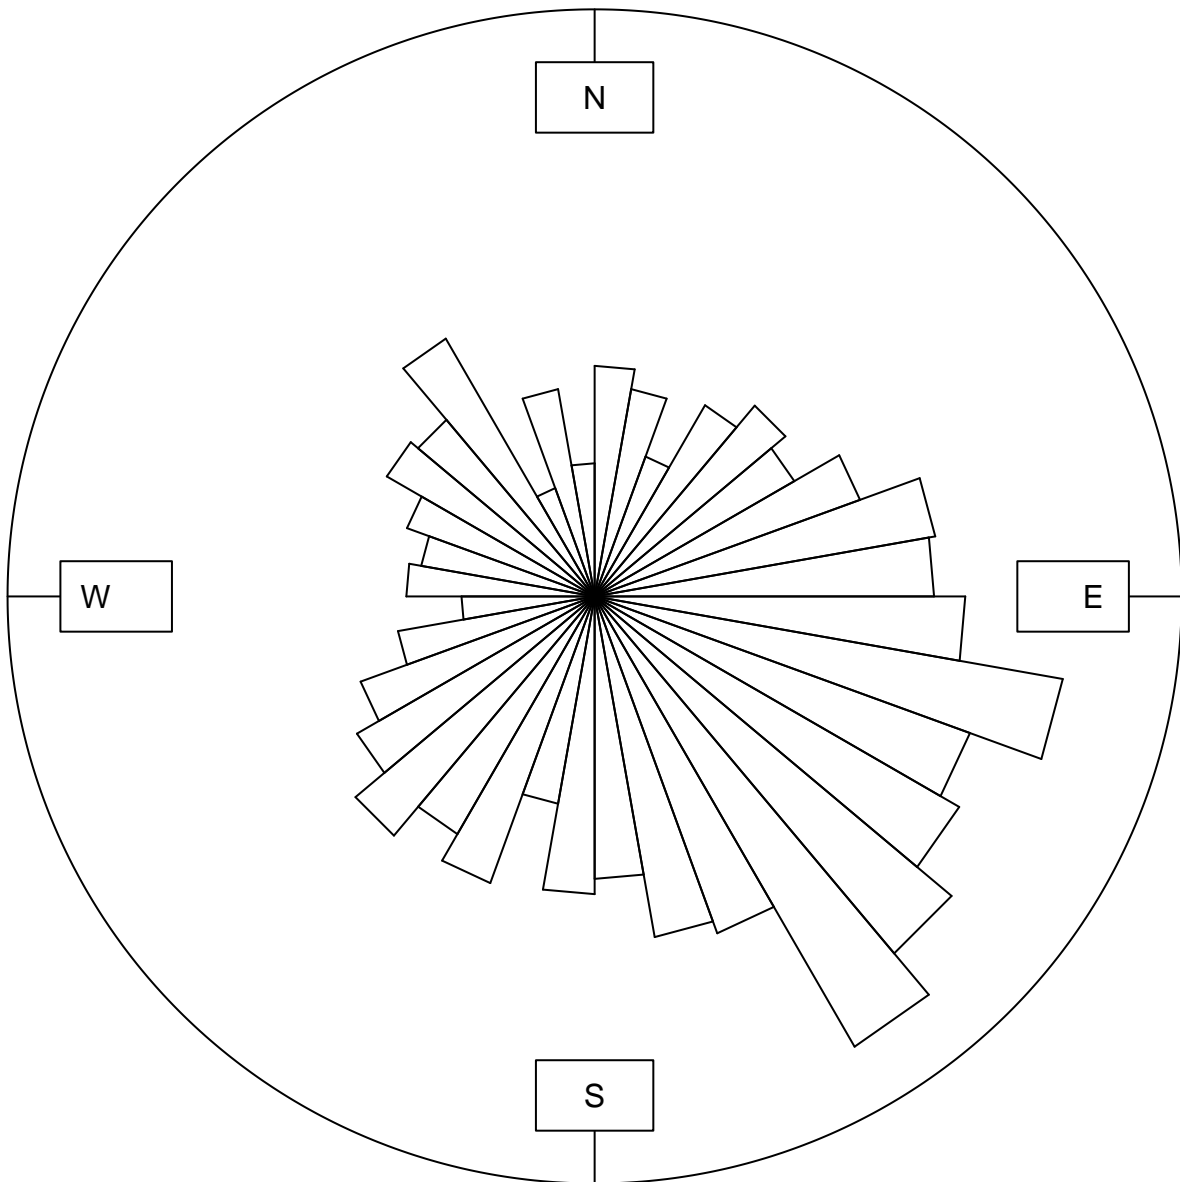

# bootstrap 573

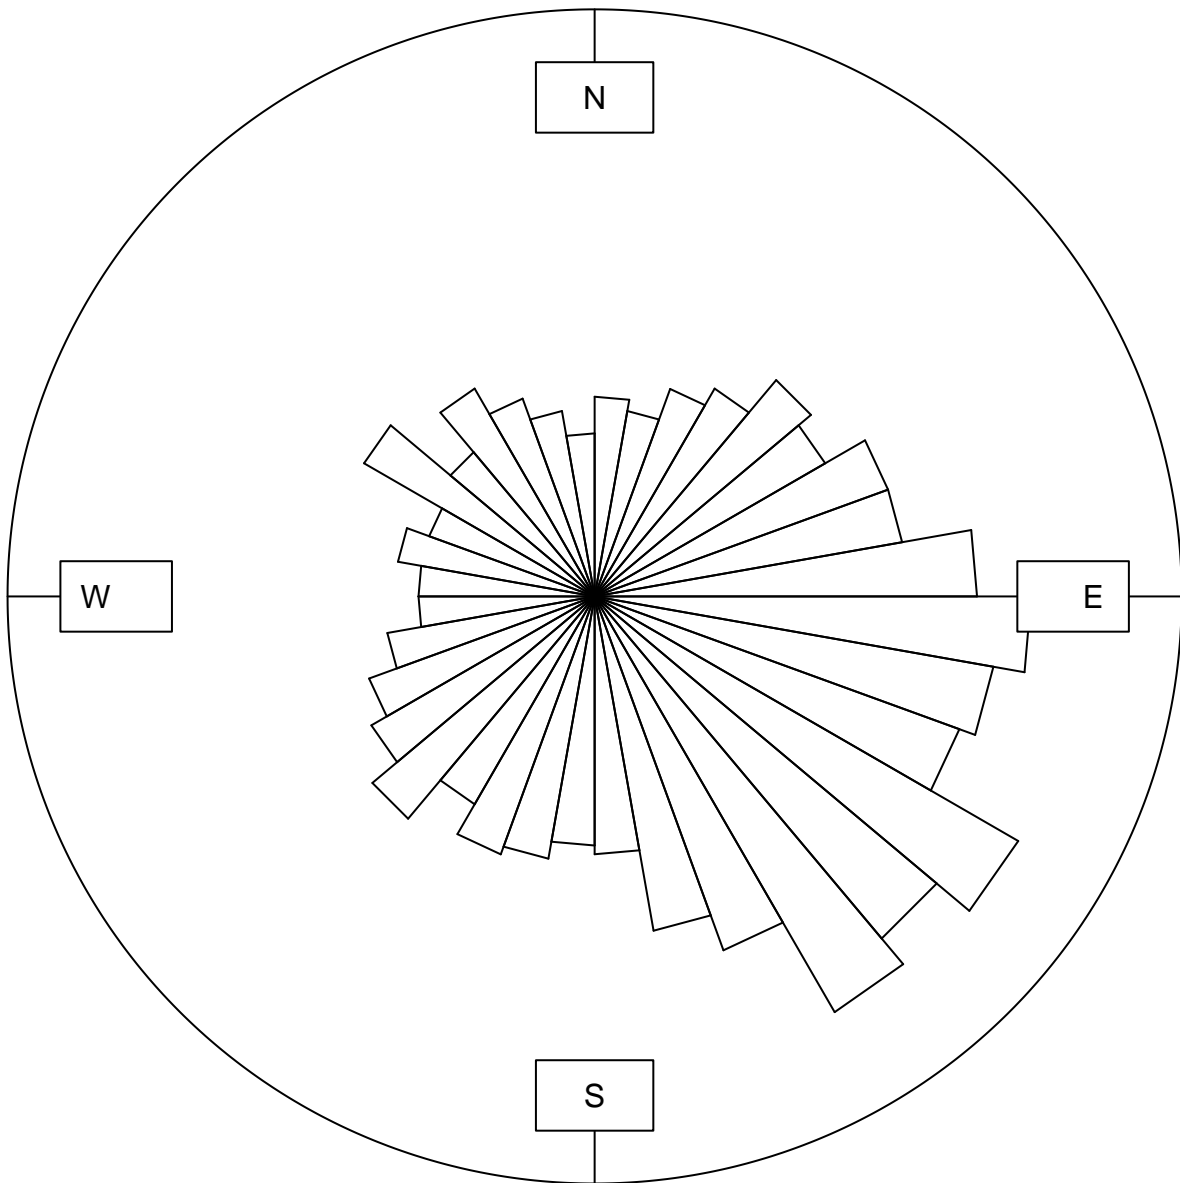

# bootstrap 574

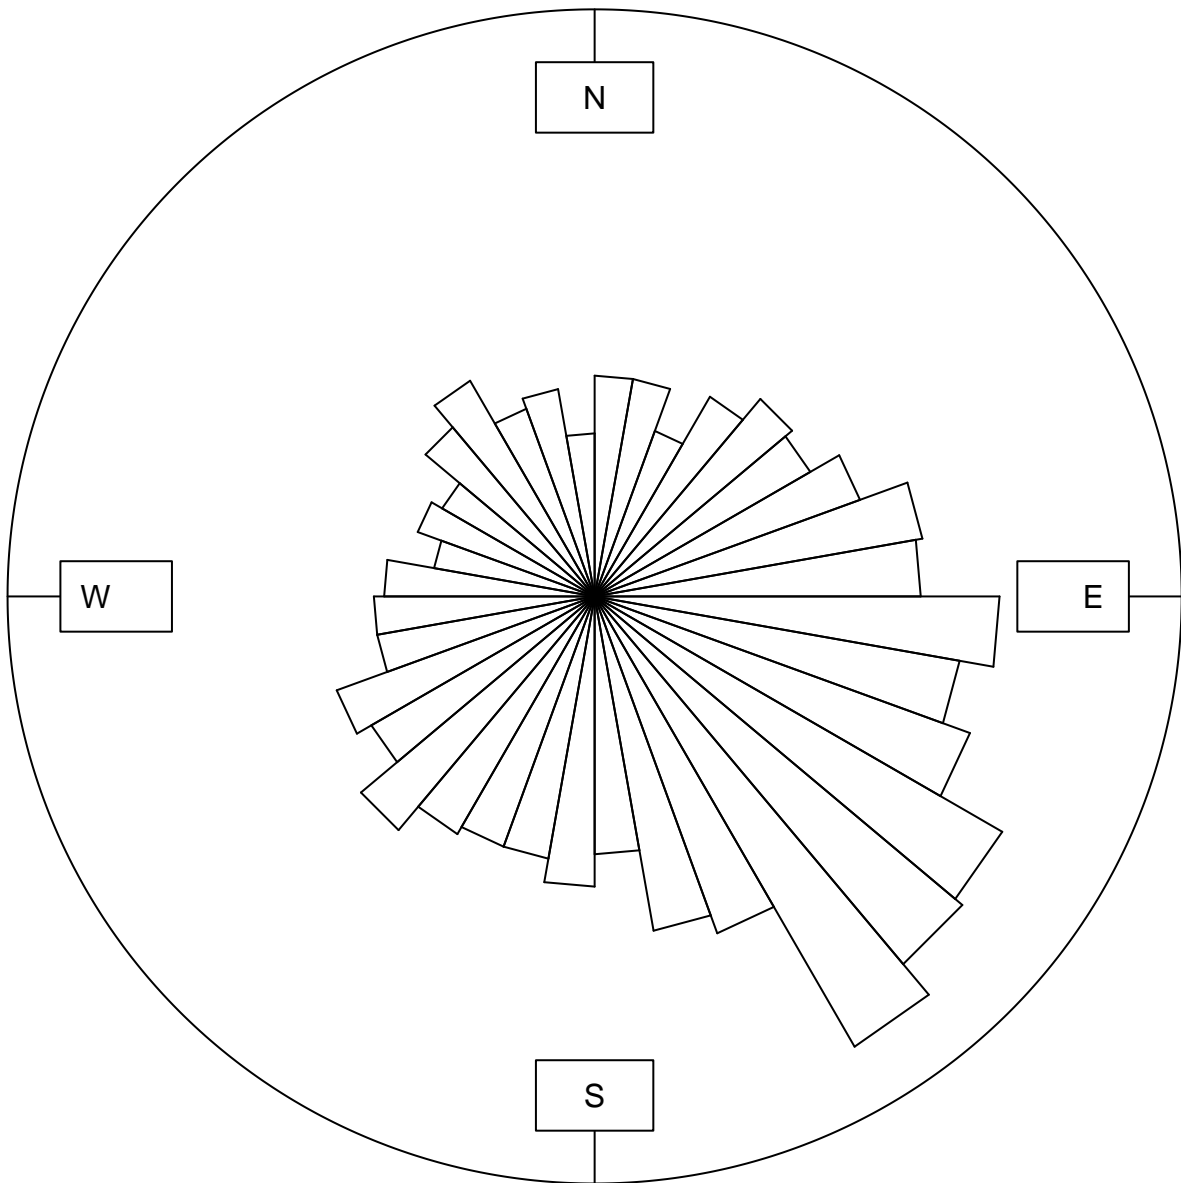

# bootstrap 575

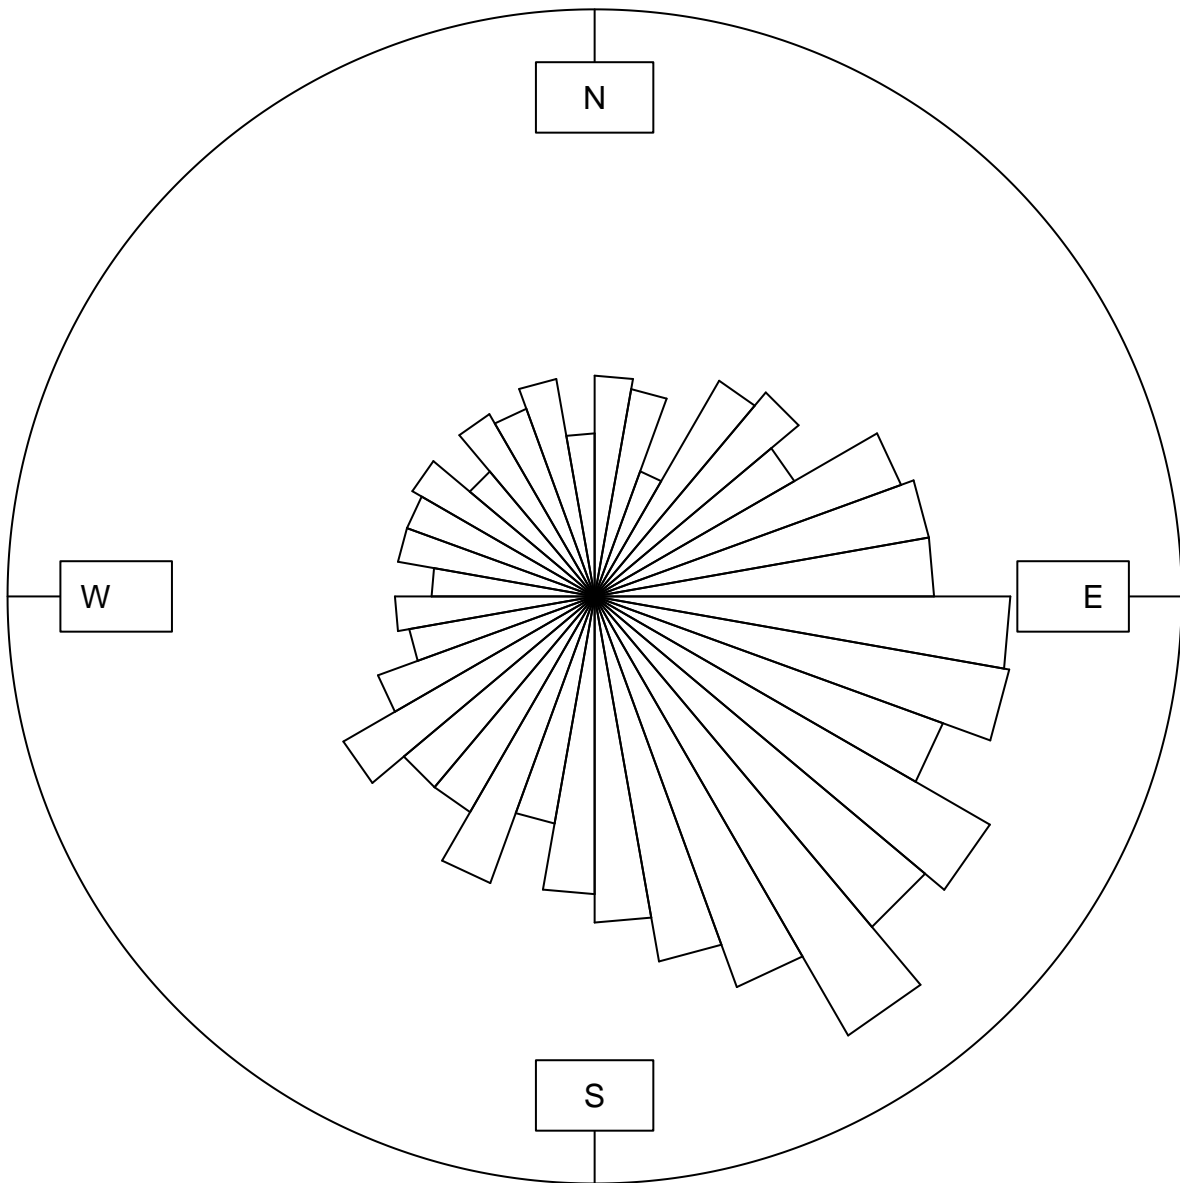

# bootstrap 576

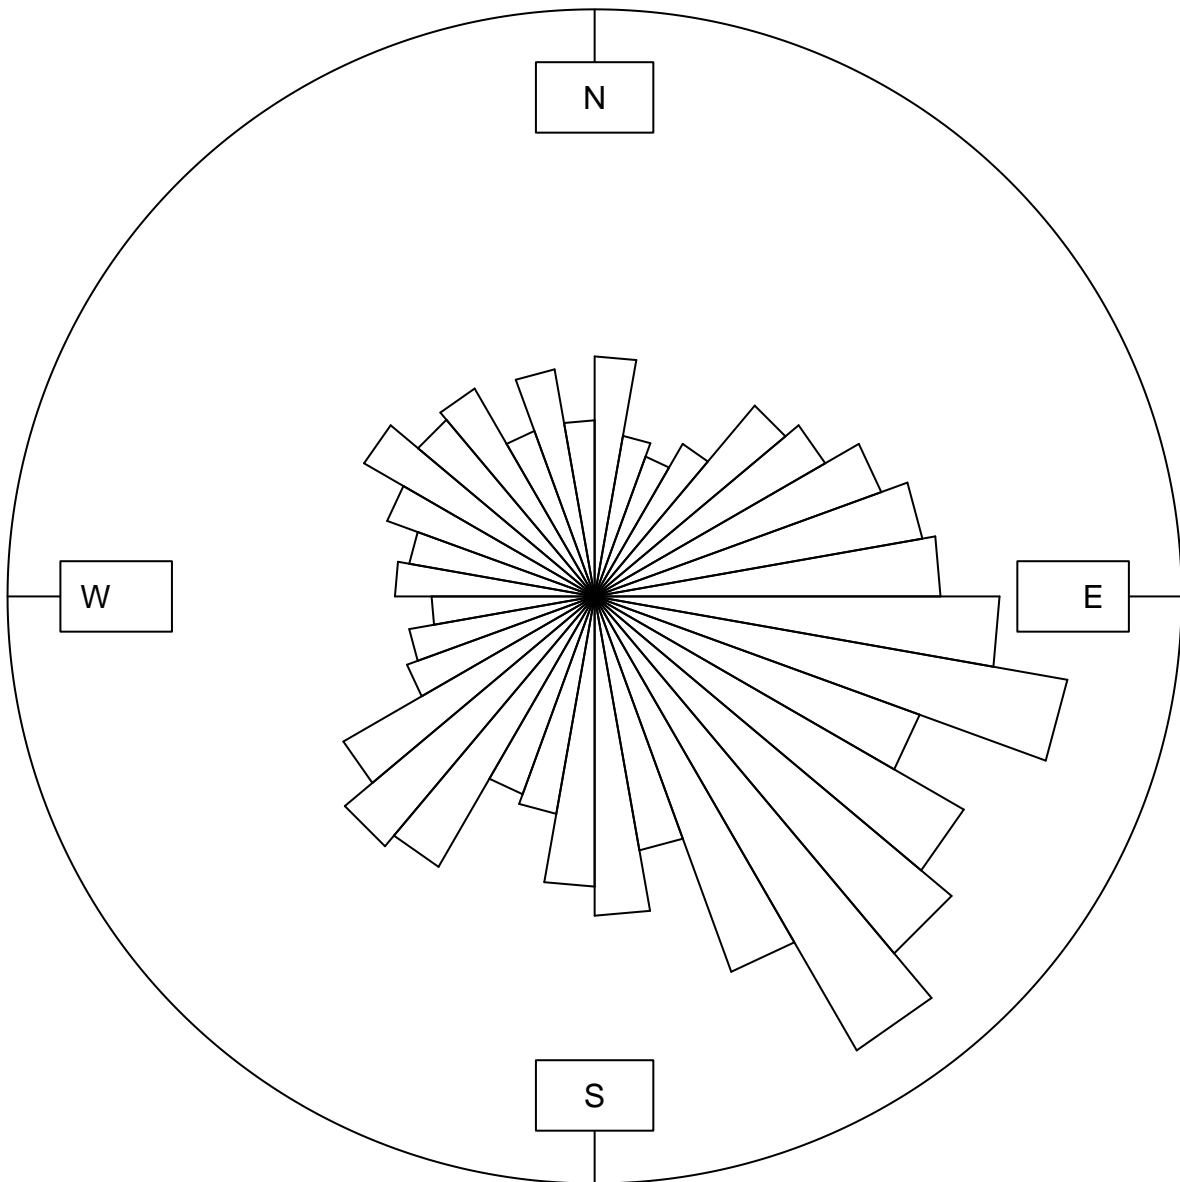



# bootstrap 577

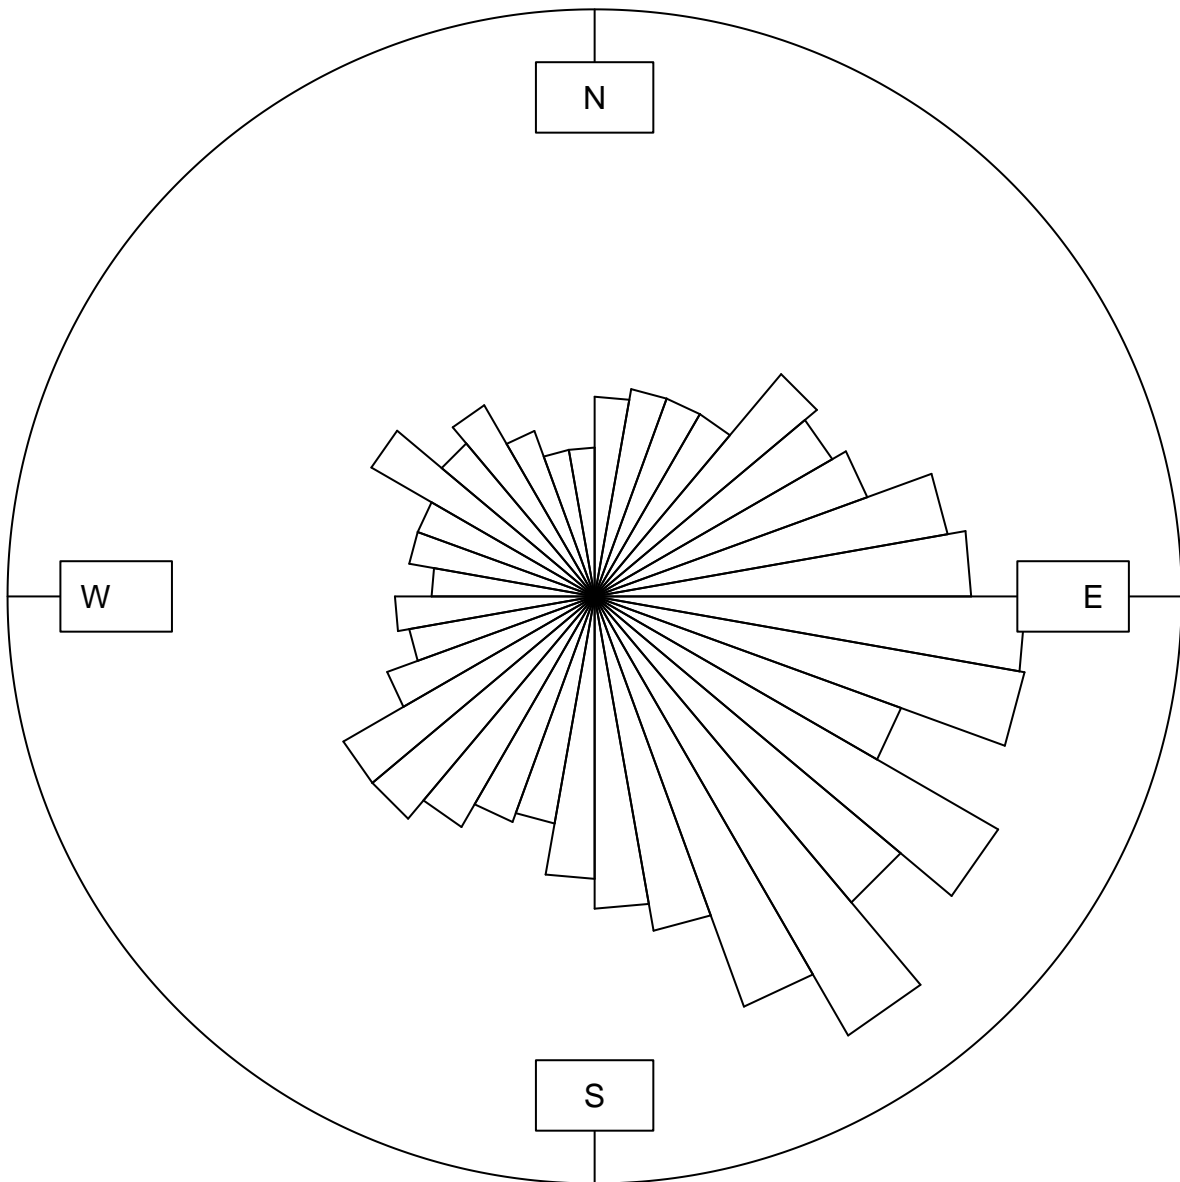

# bootstrap 578

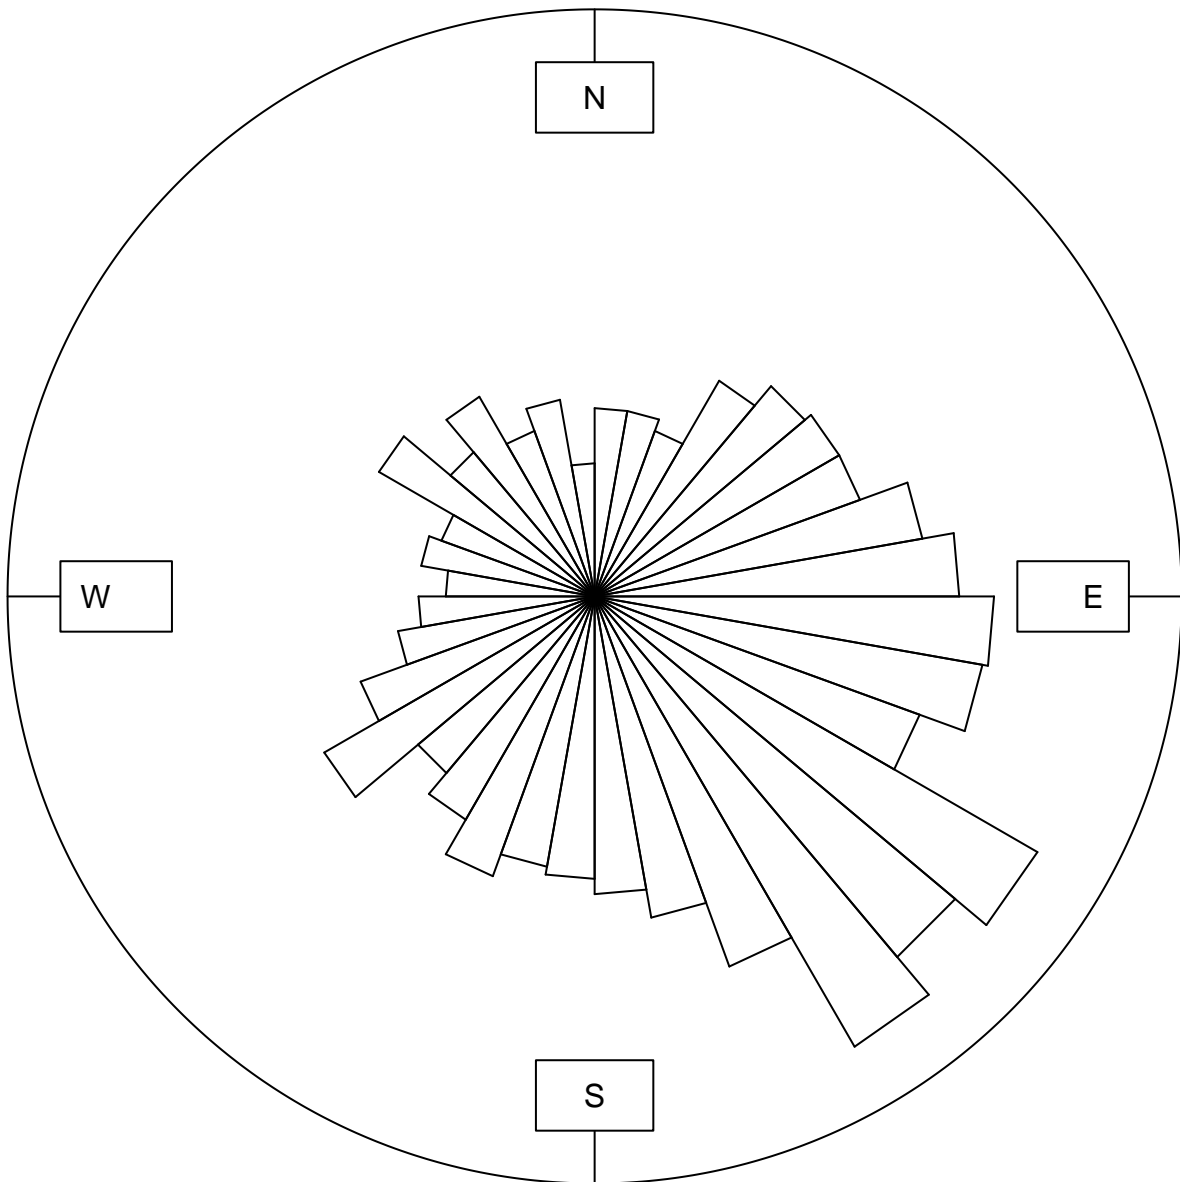

# bootstrap 579

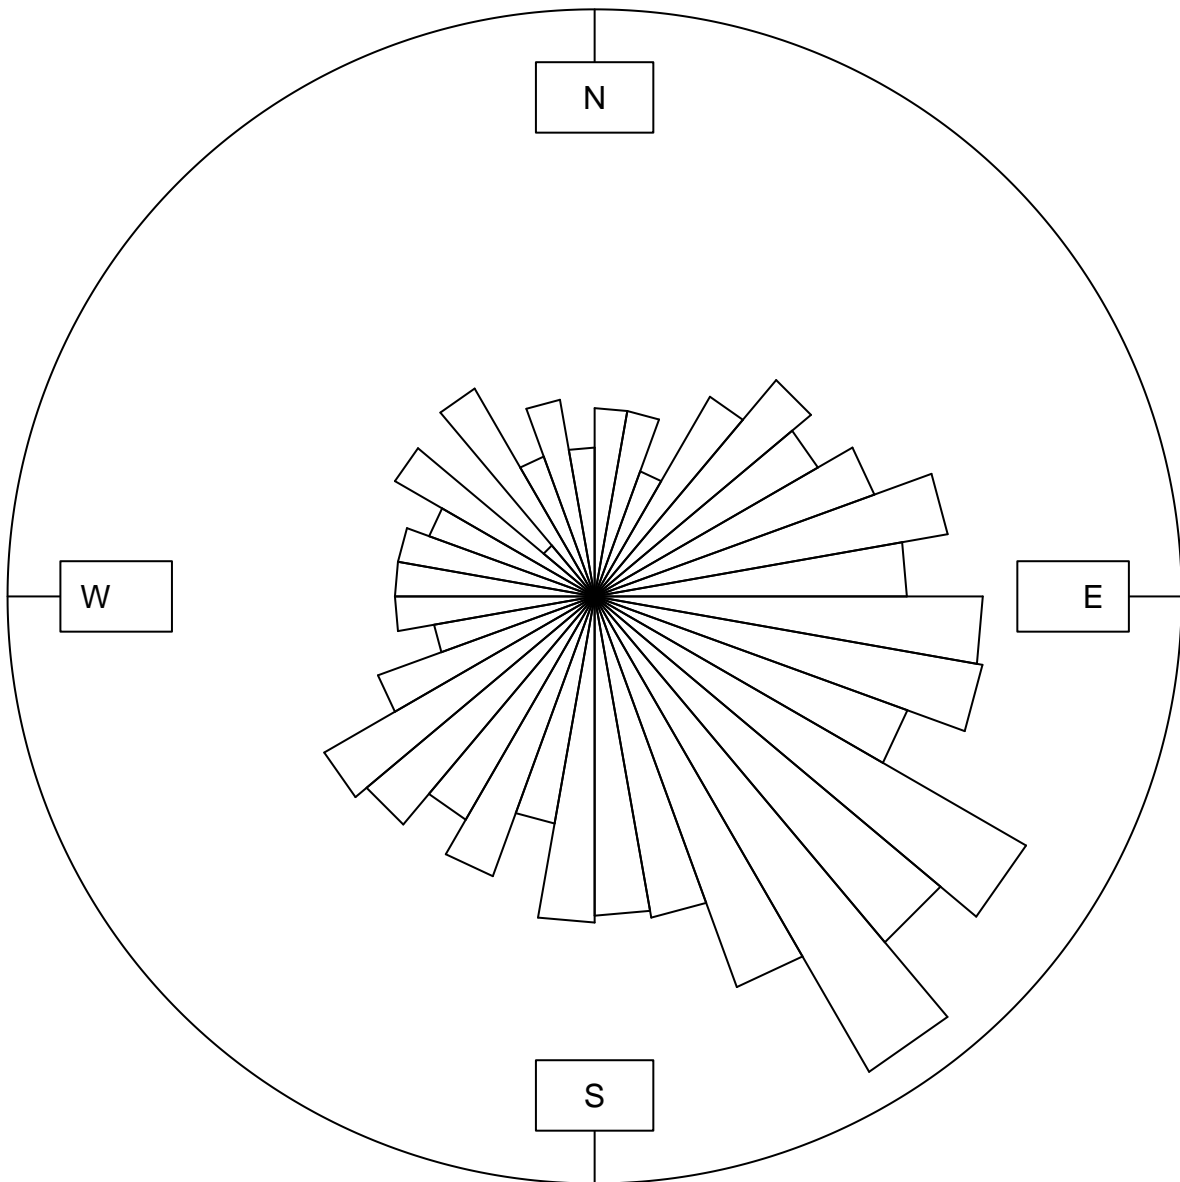

# bootstrap 580

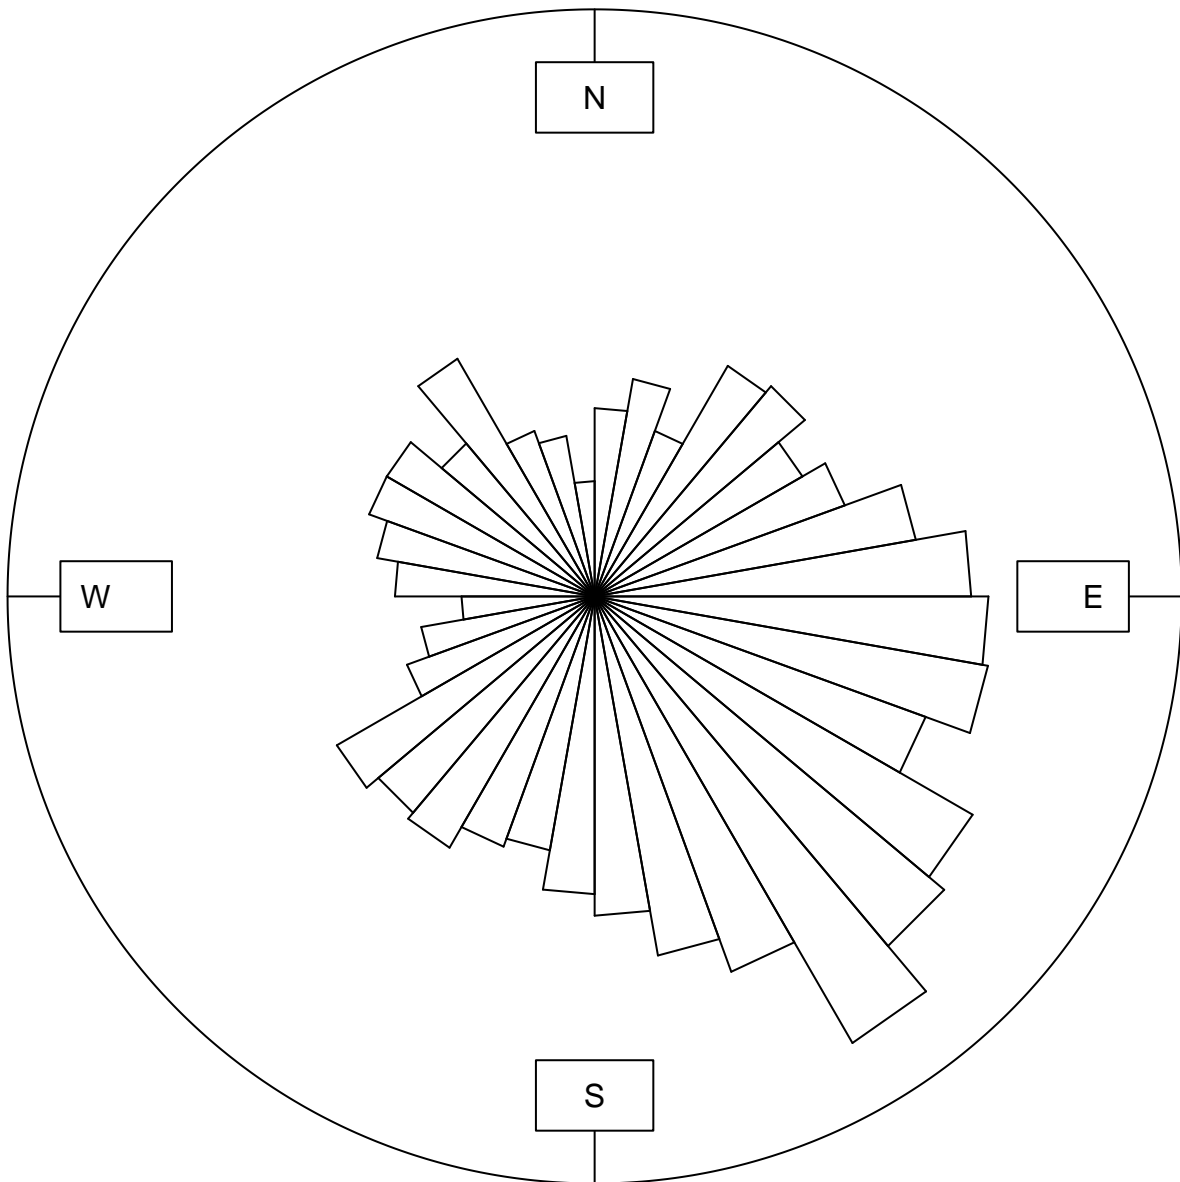

# bootstrap 581

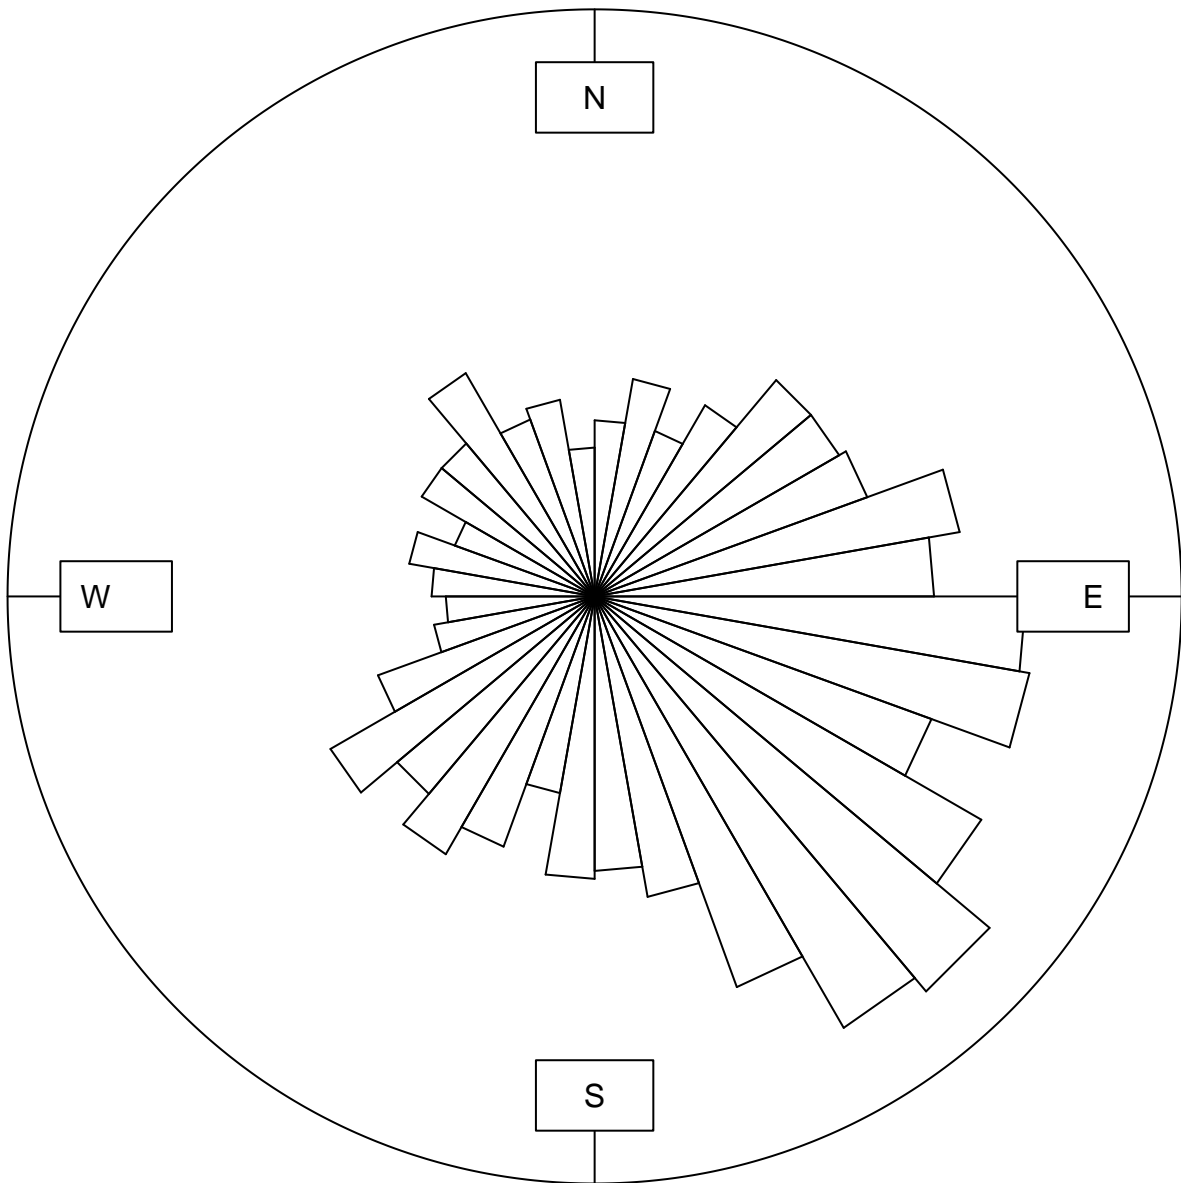

# bootstrap 582

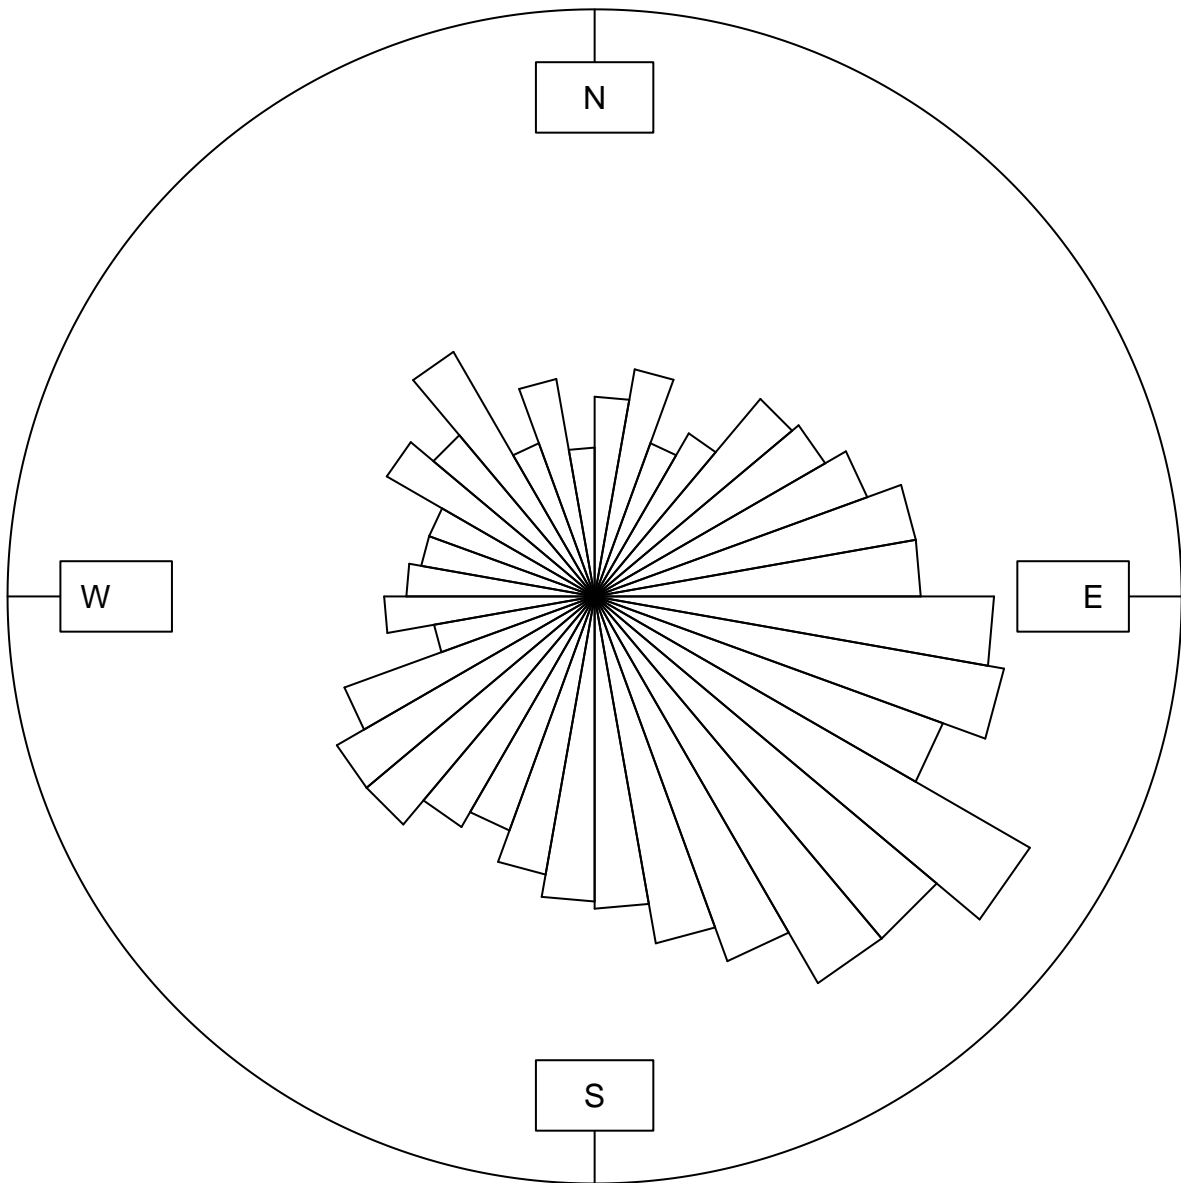

# bootstrap 583

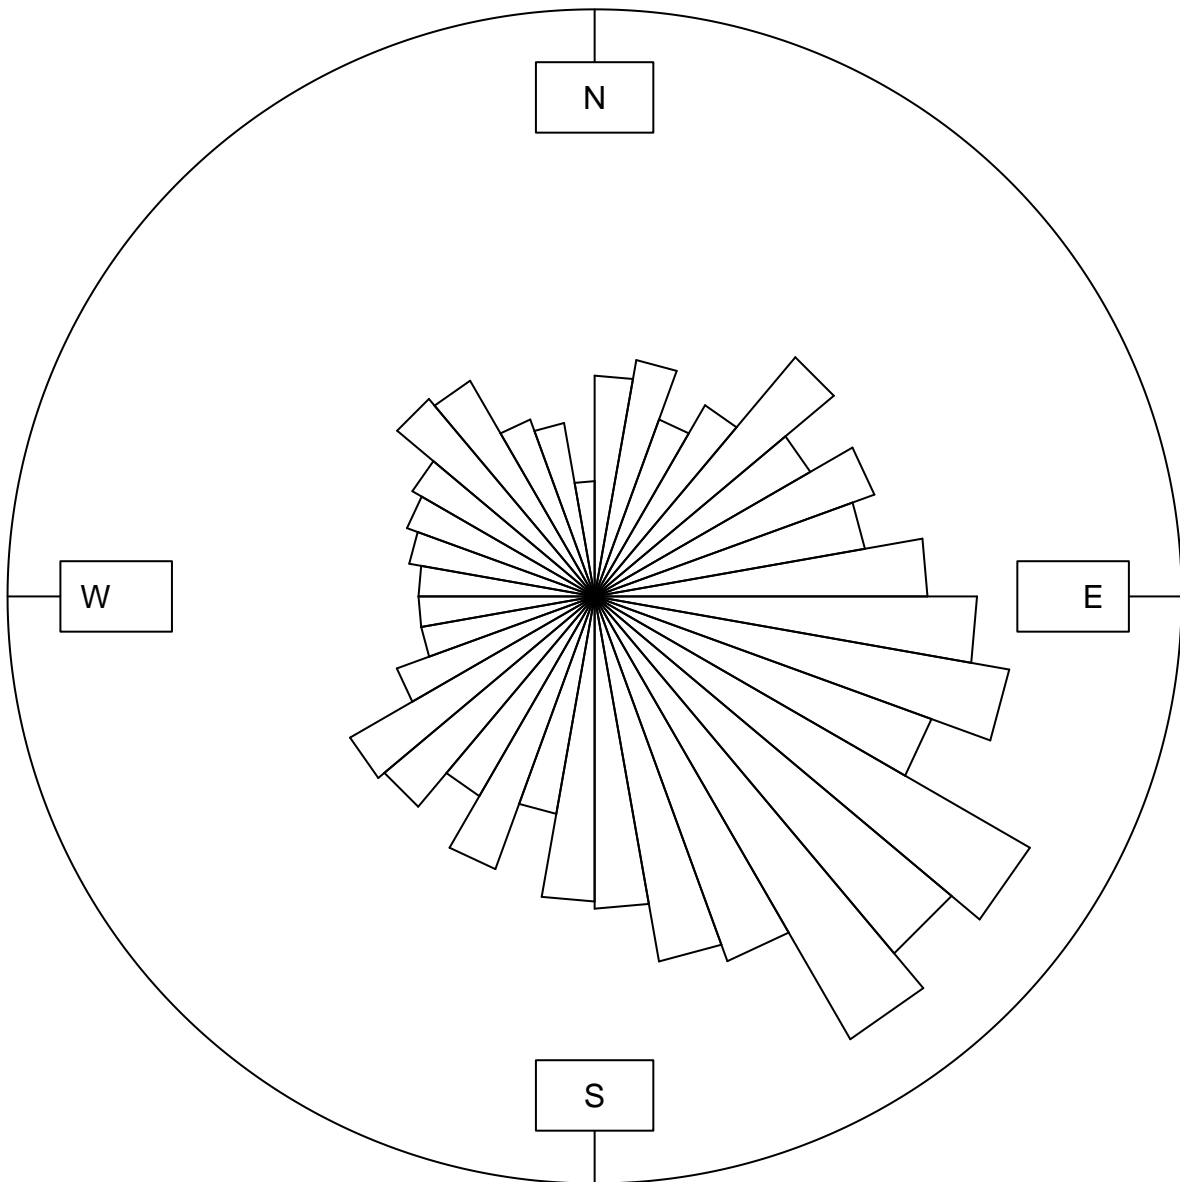

# bootstrap 584

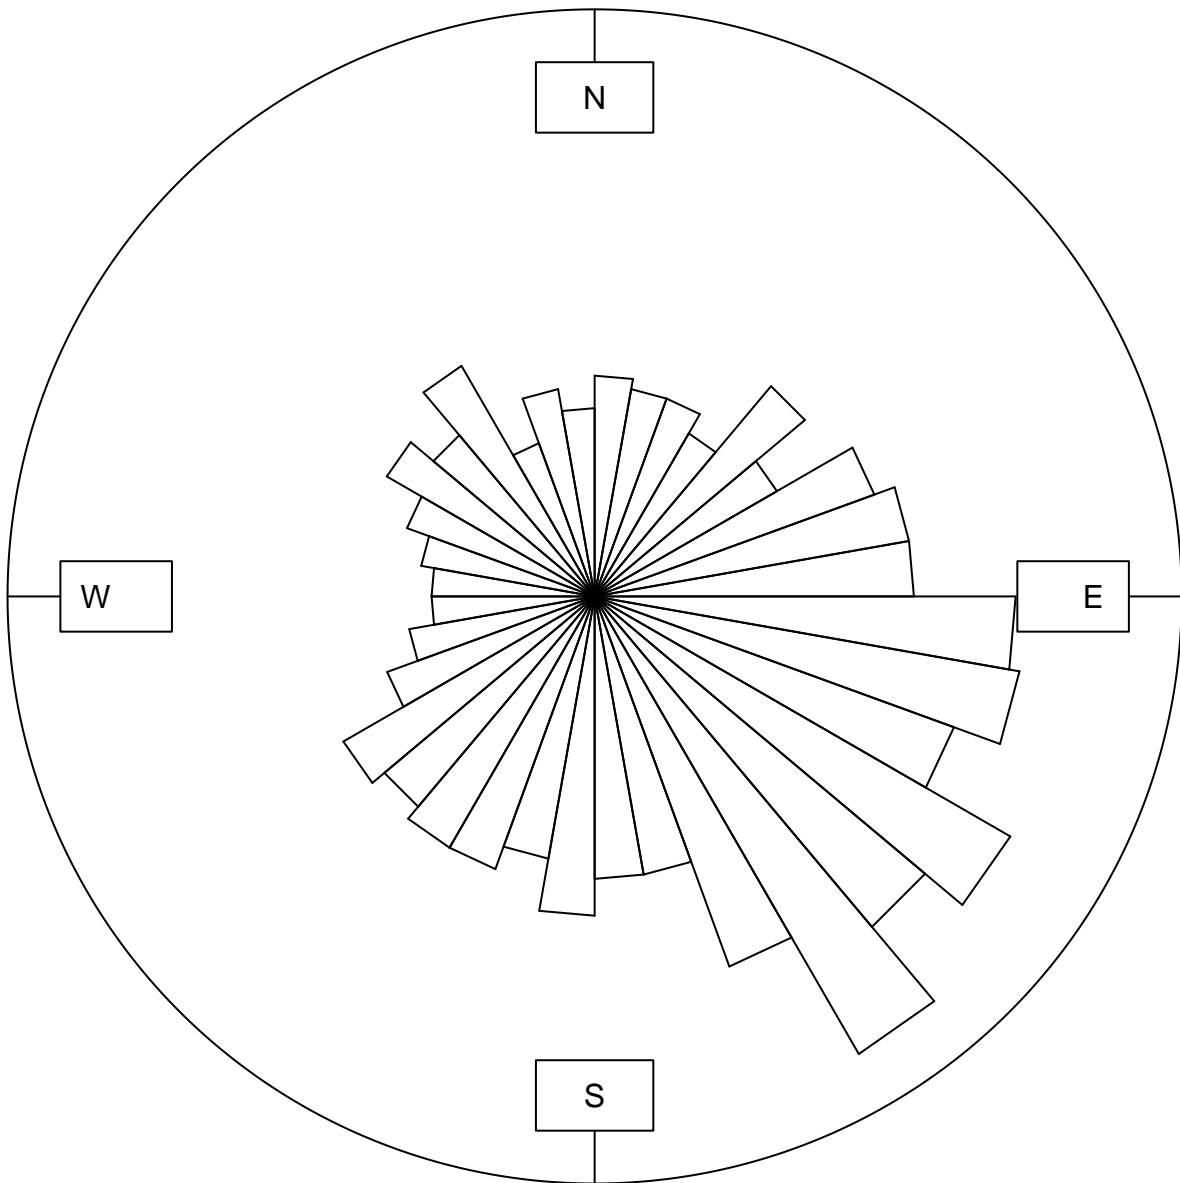



# bootstrap 585

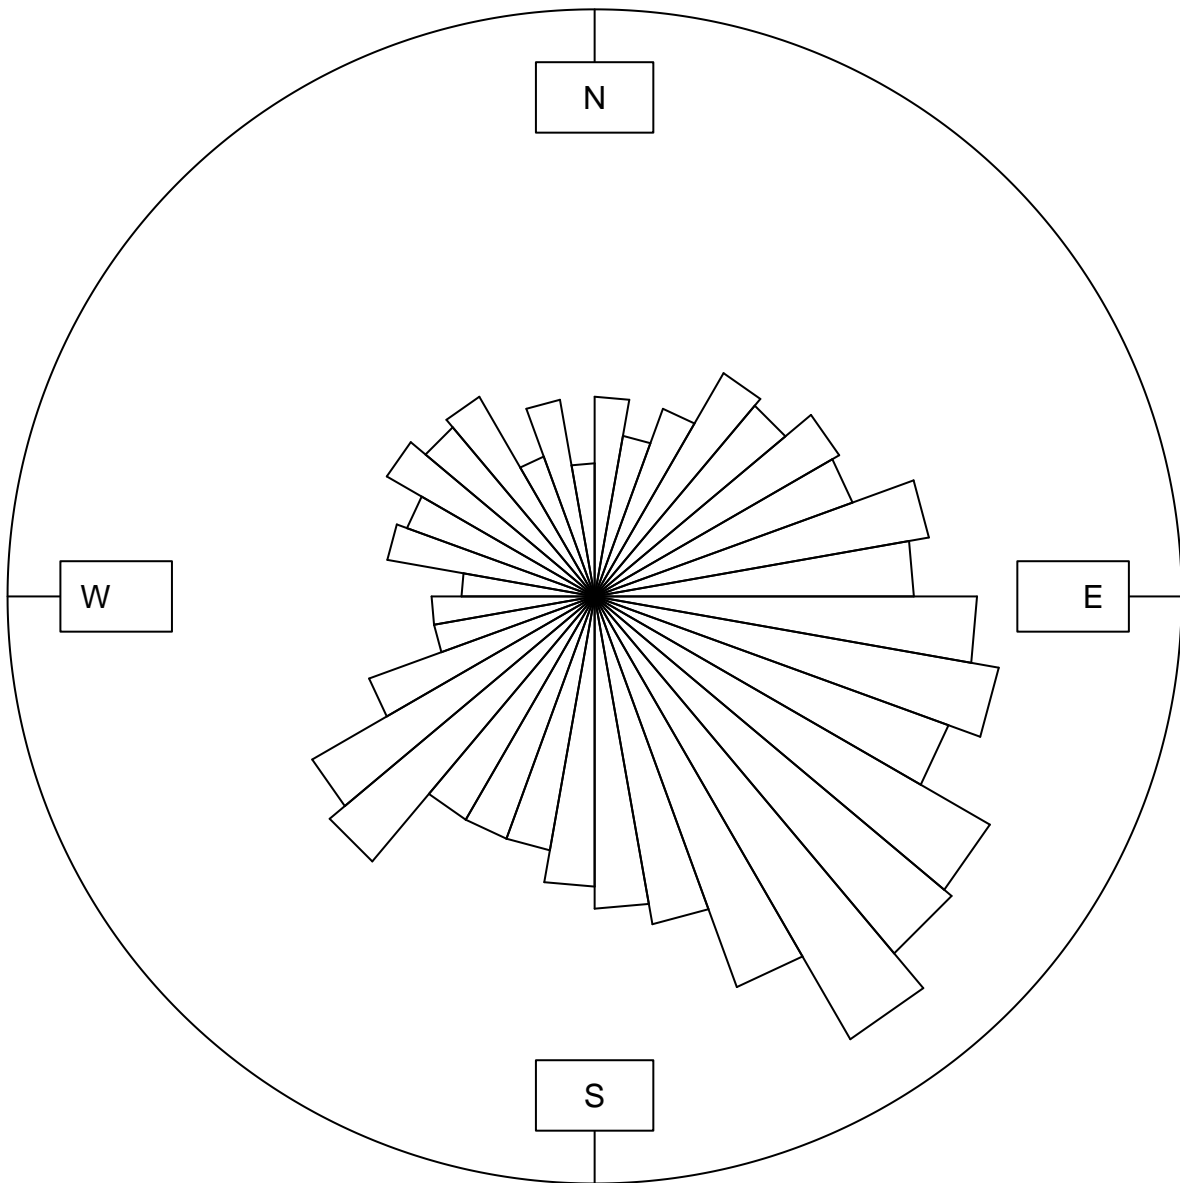

# bootstrap 586

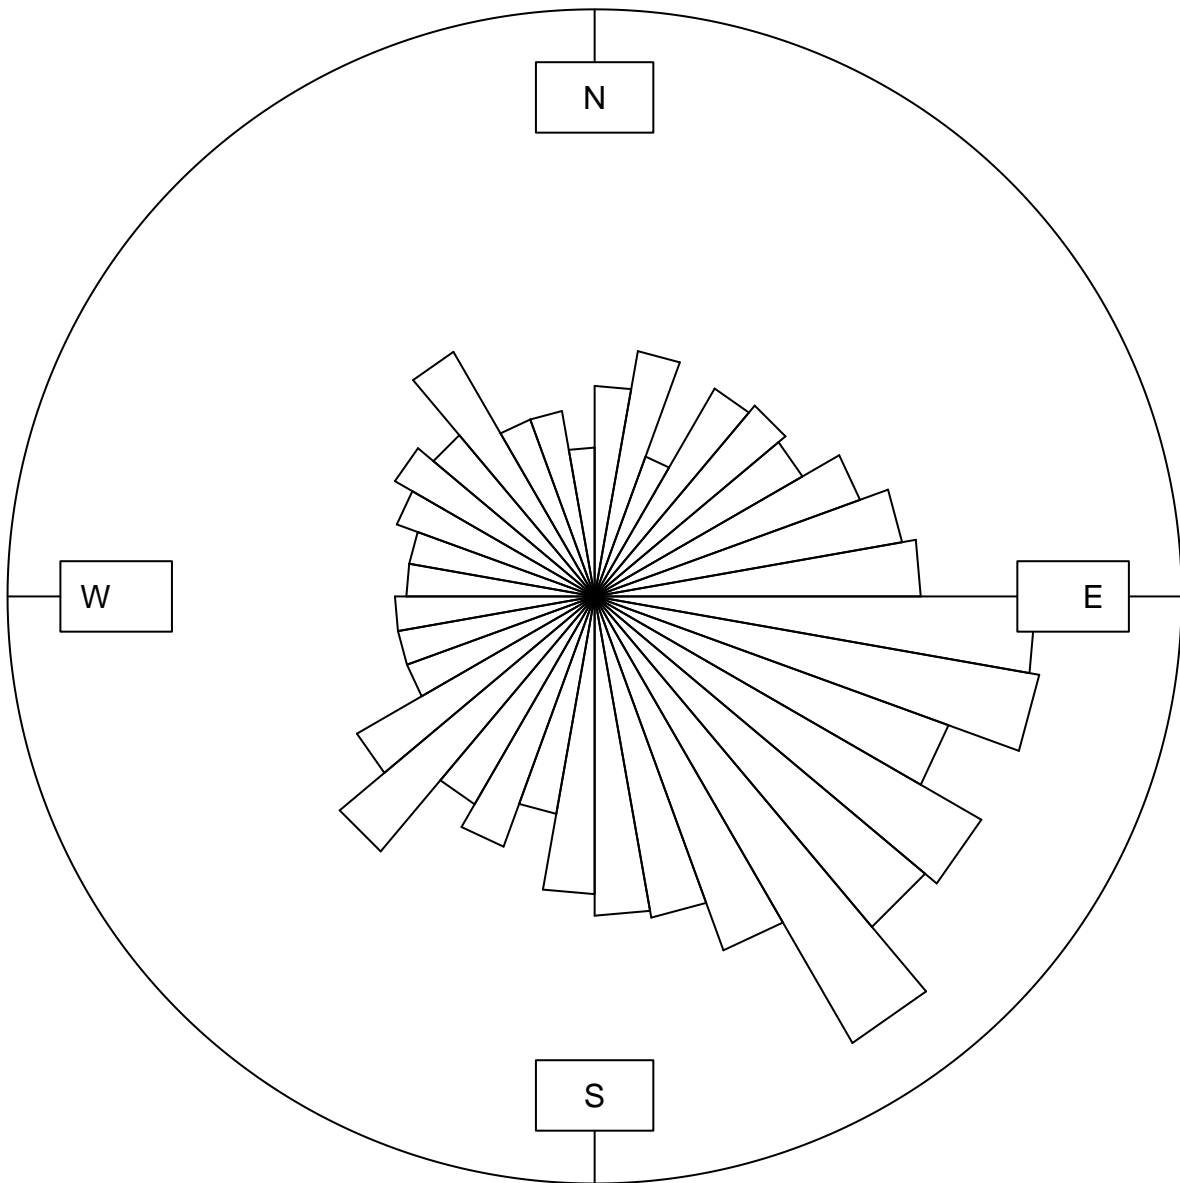

# bootstrap 587

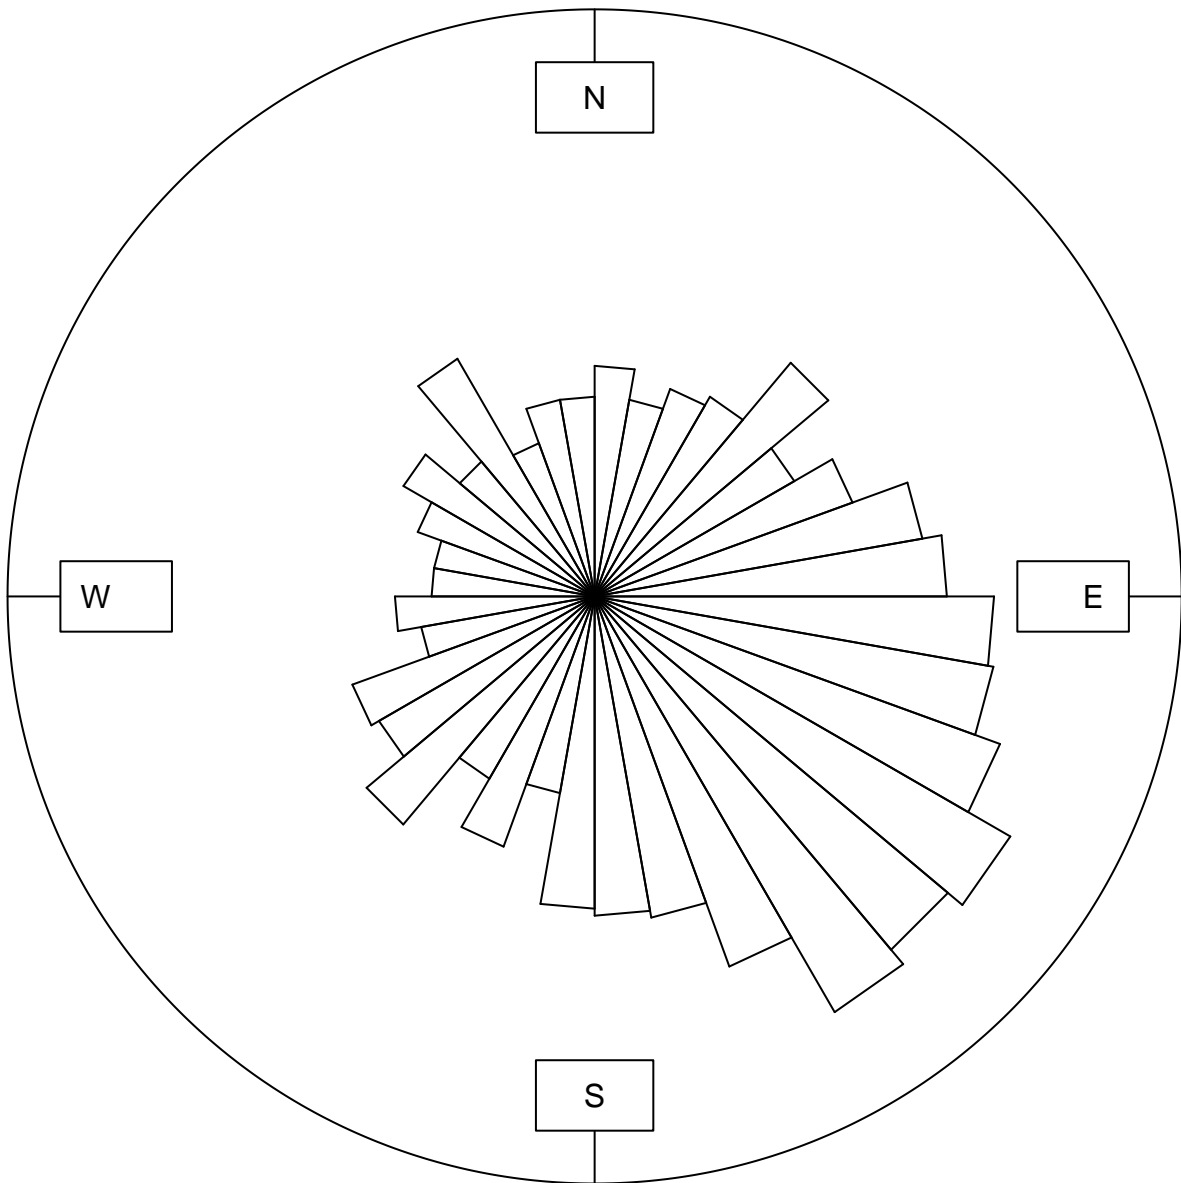

# bootstrap 588

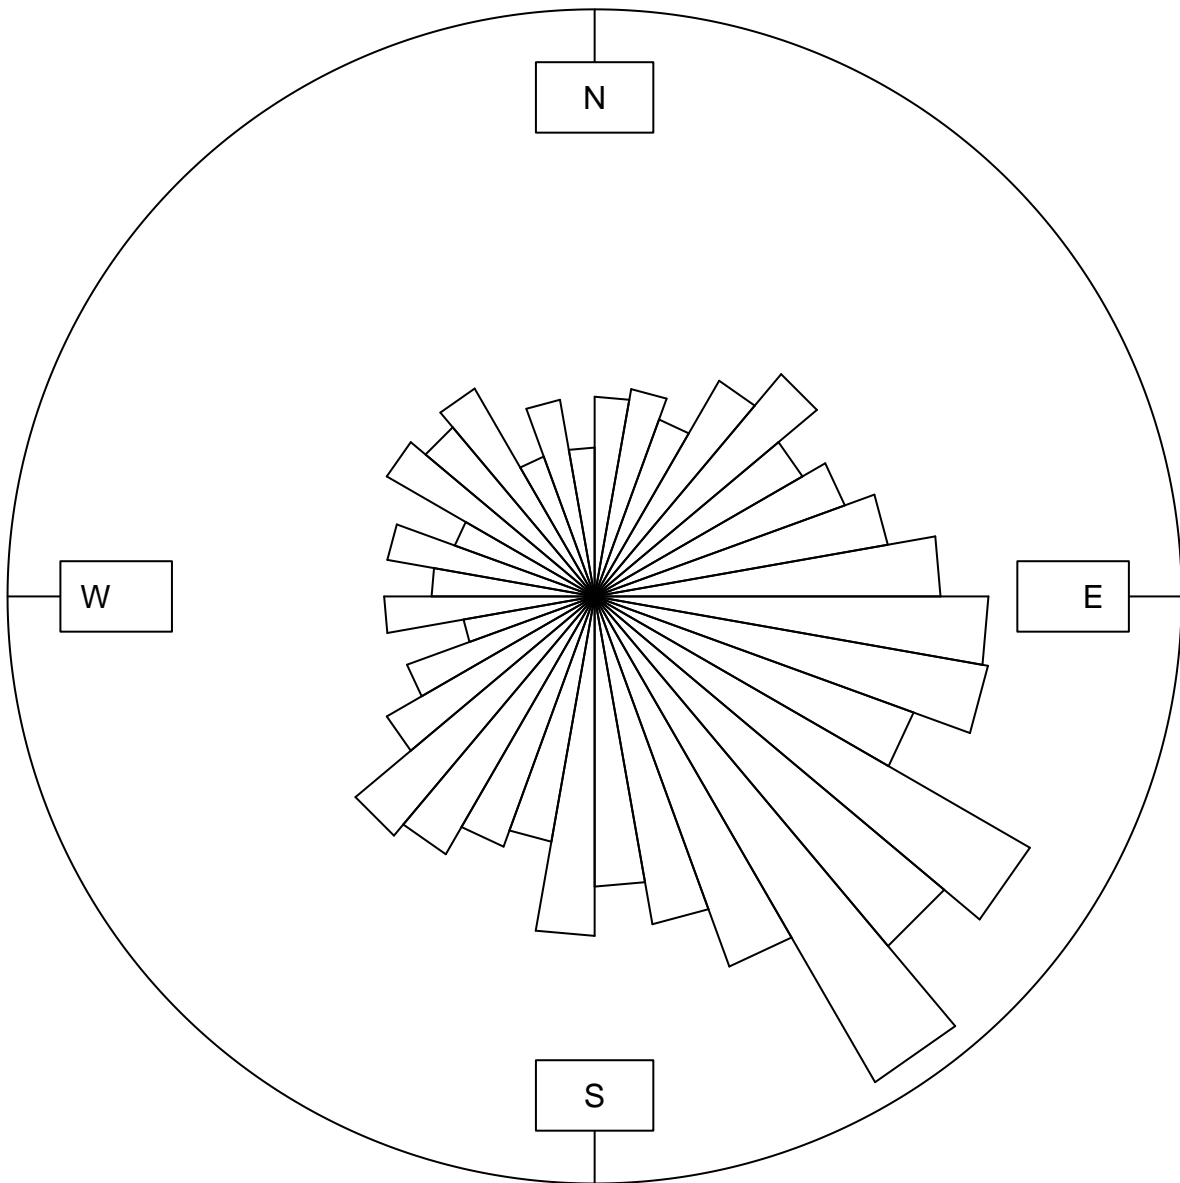

# bootstrap 589

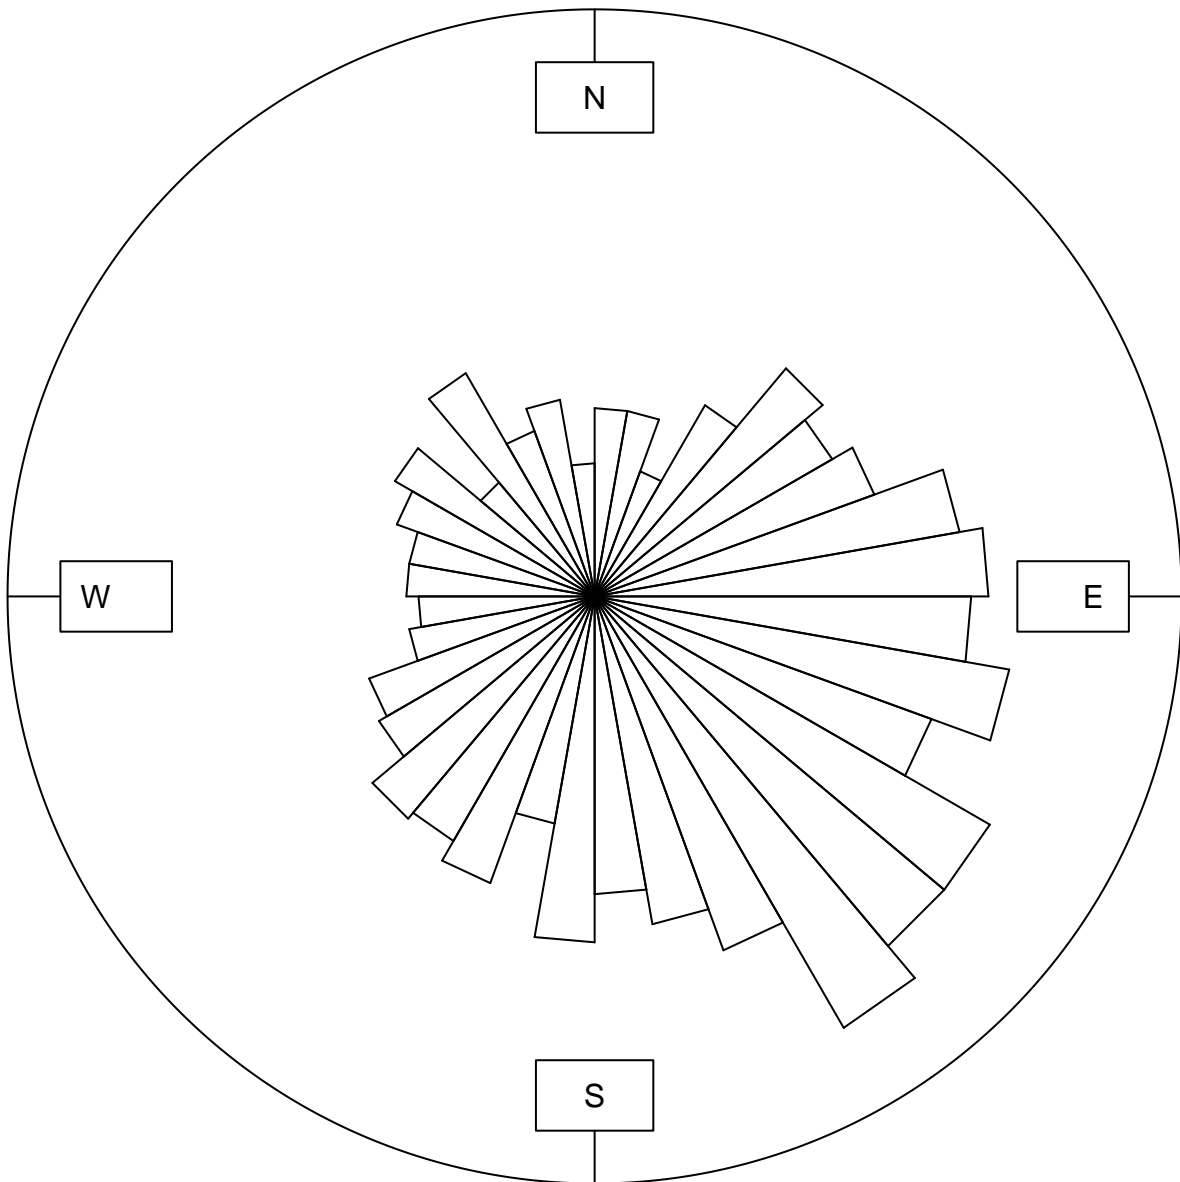

# bootstrap 590

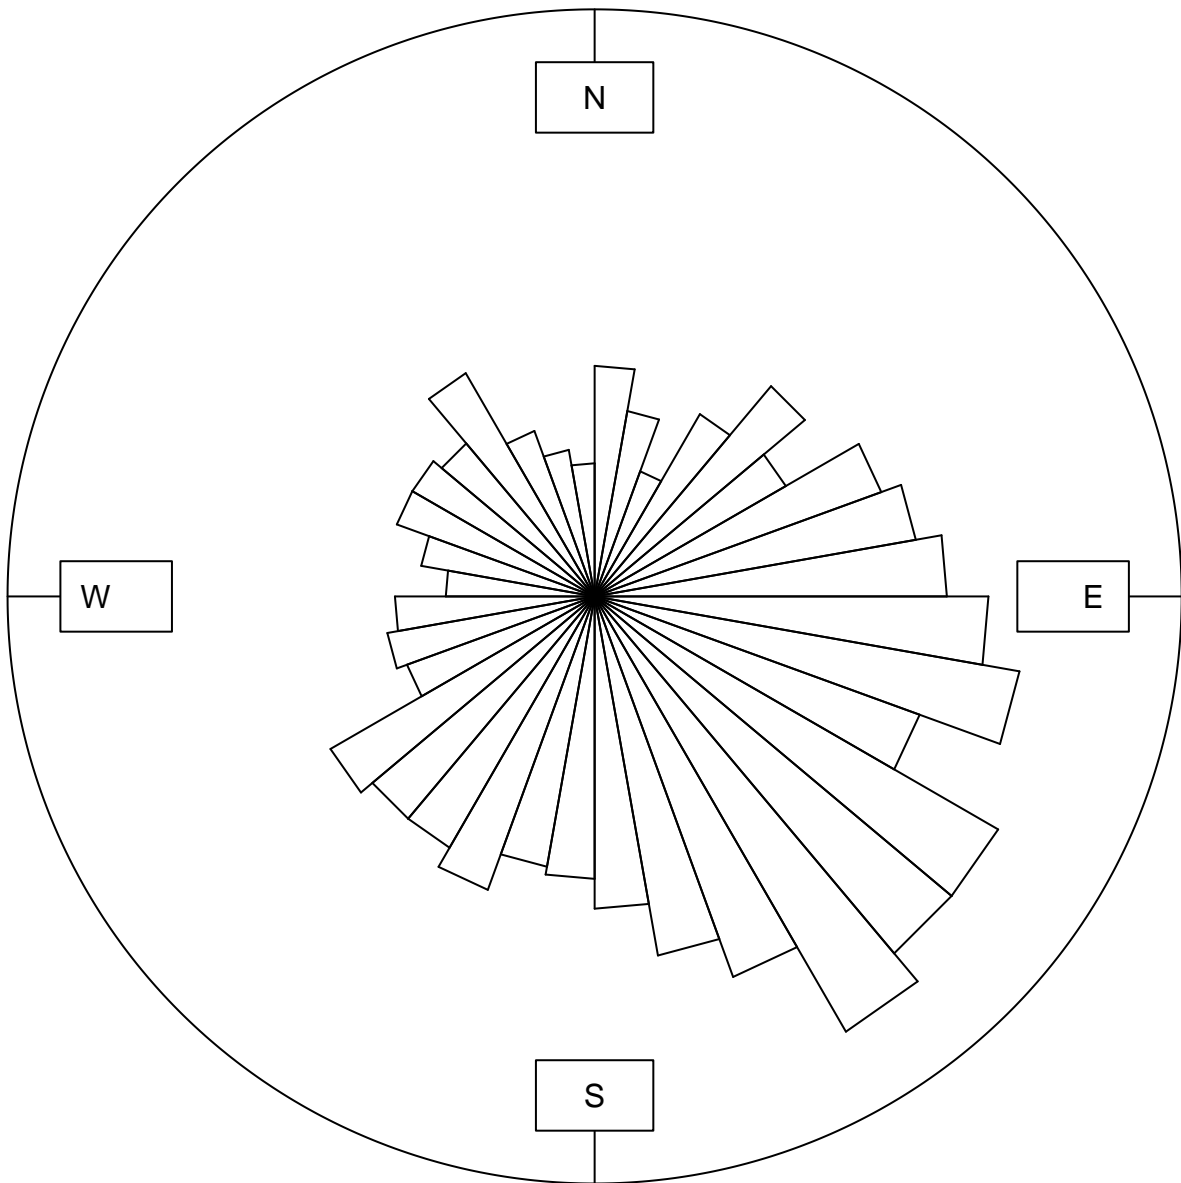

# bootstrap 591

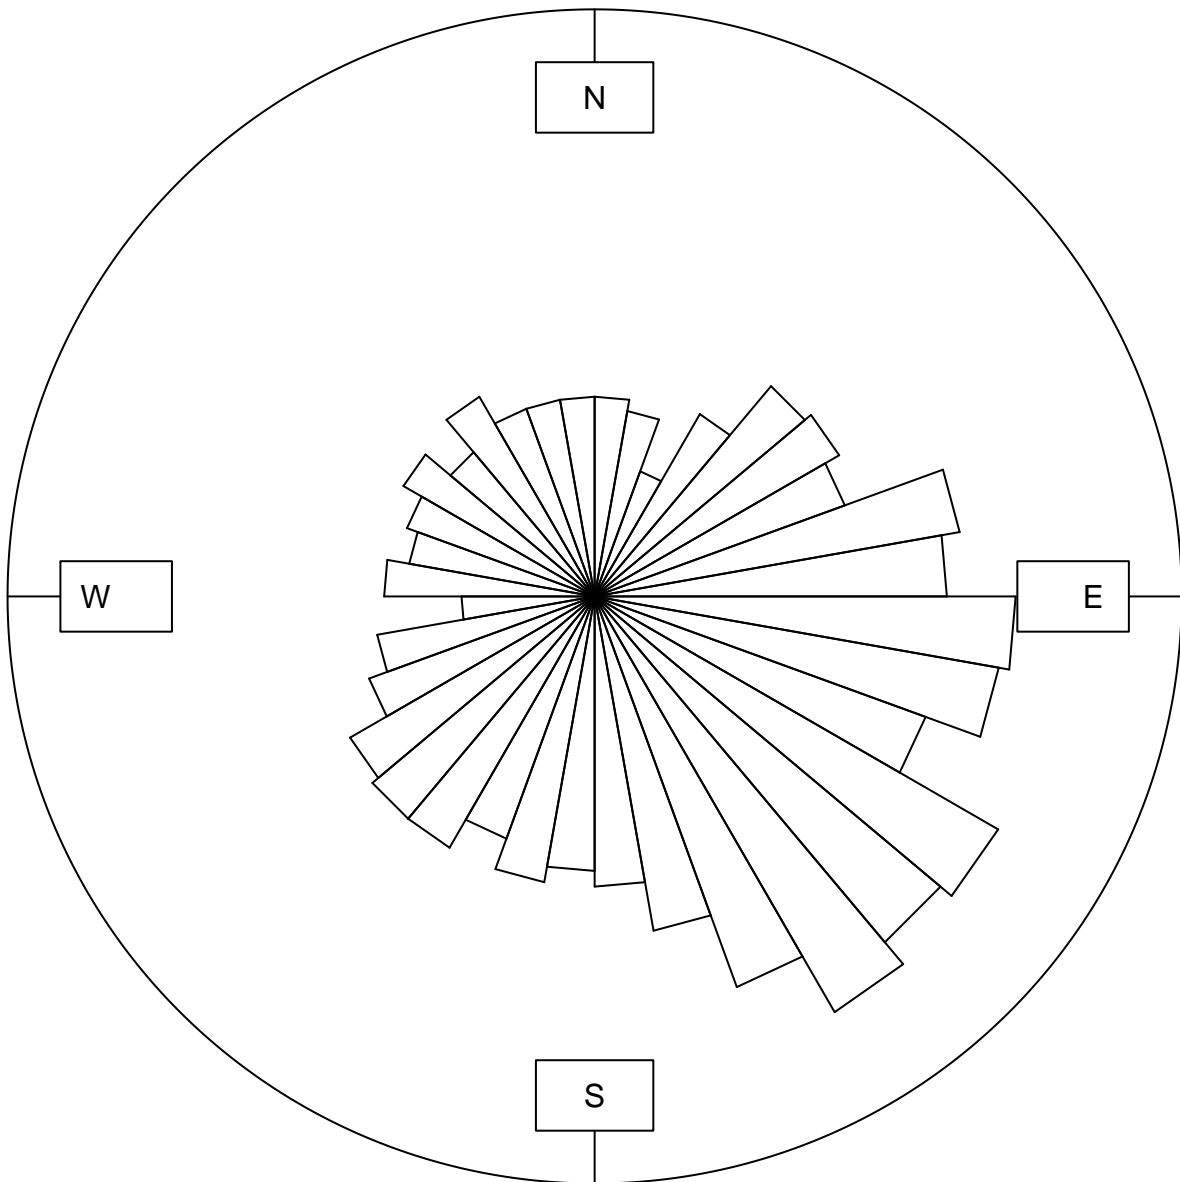

# bootstrap 592

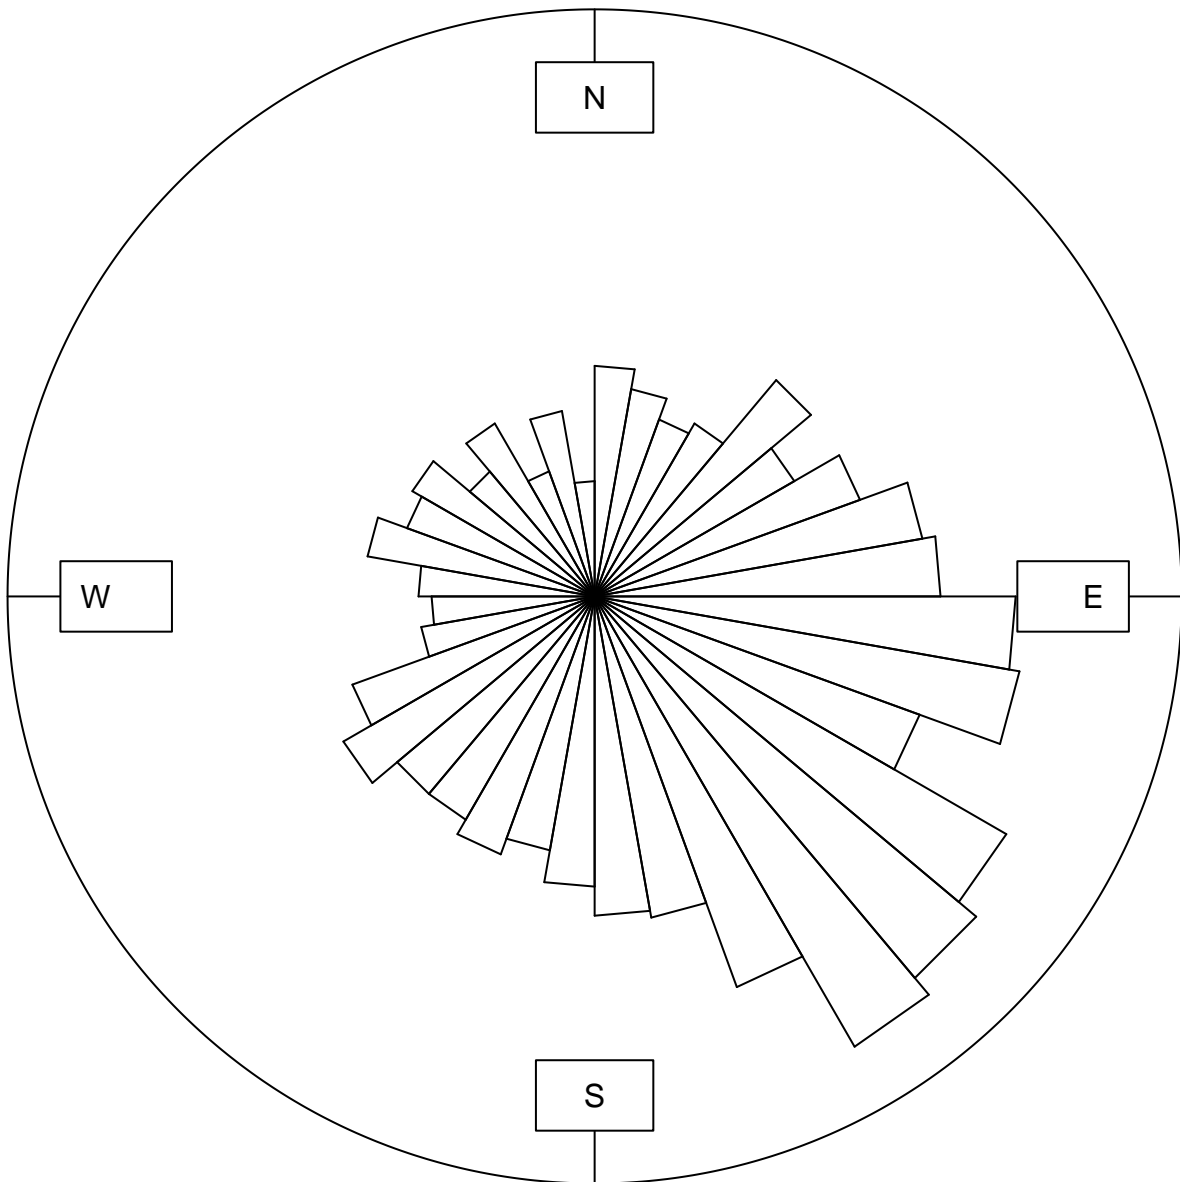



# bootstrap 593

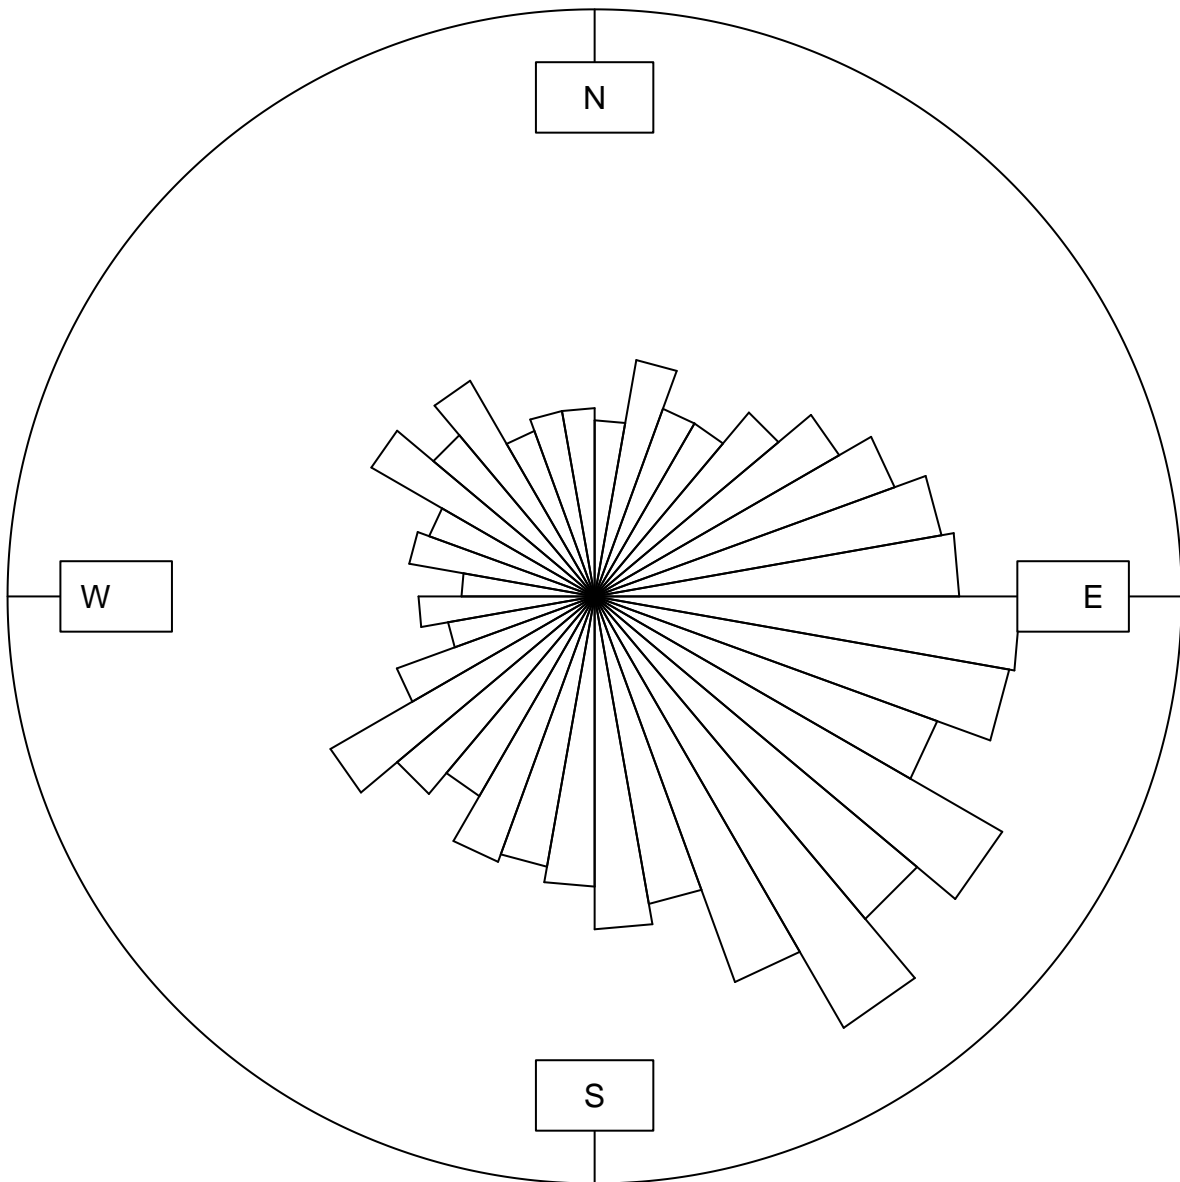

# bootstrap 594

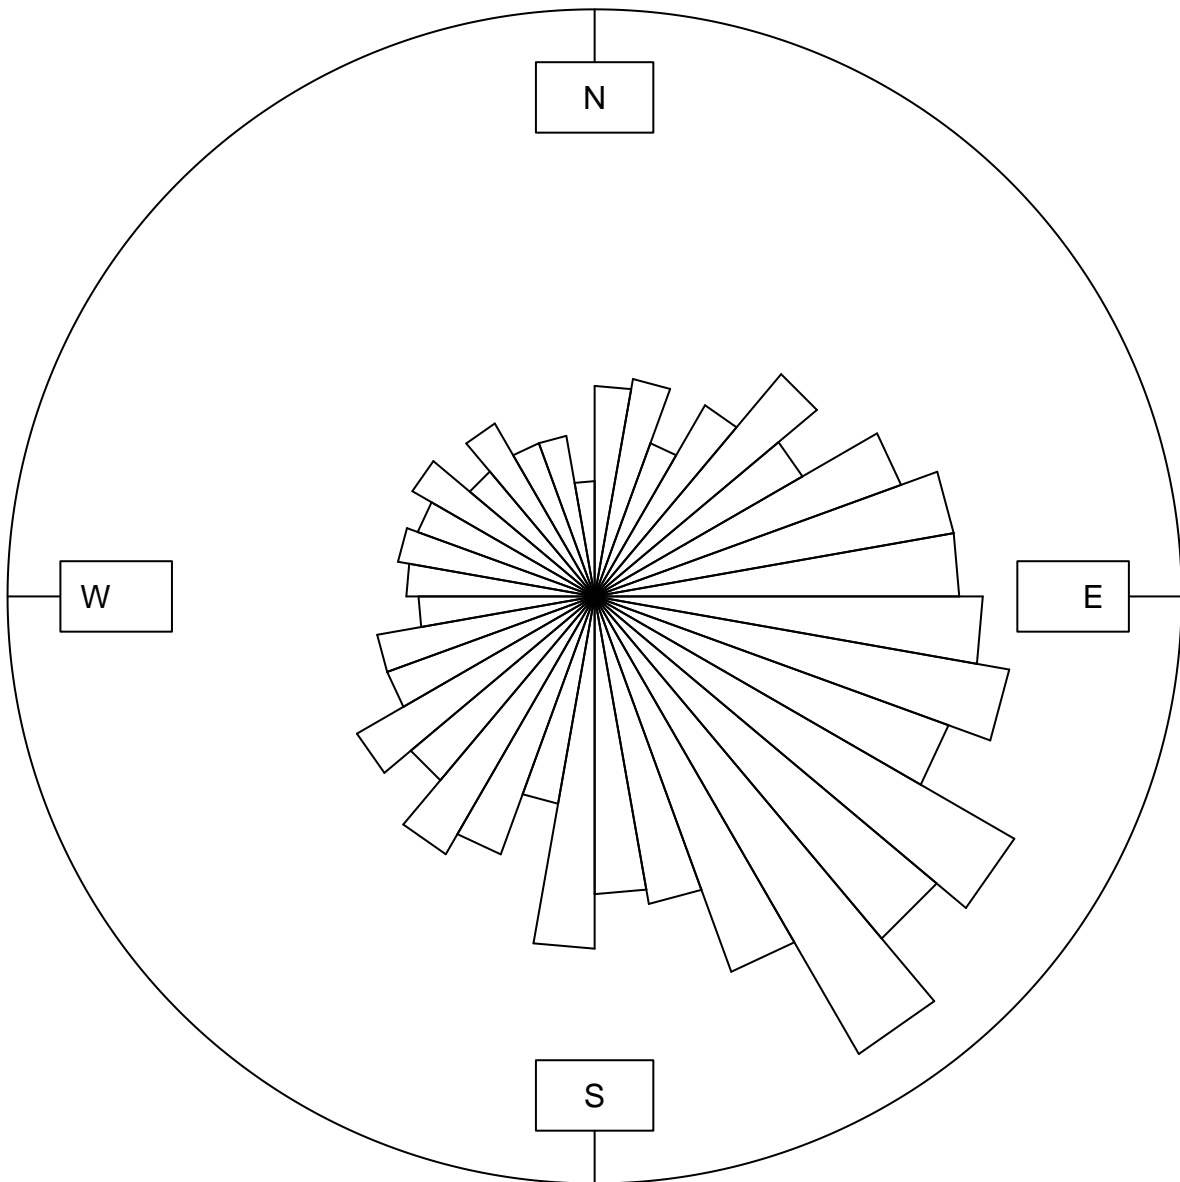

# bootstrap 595

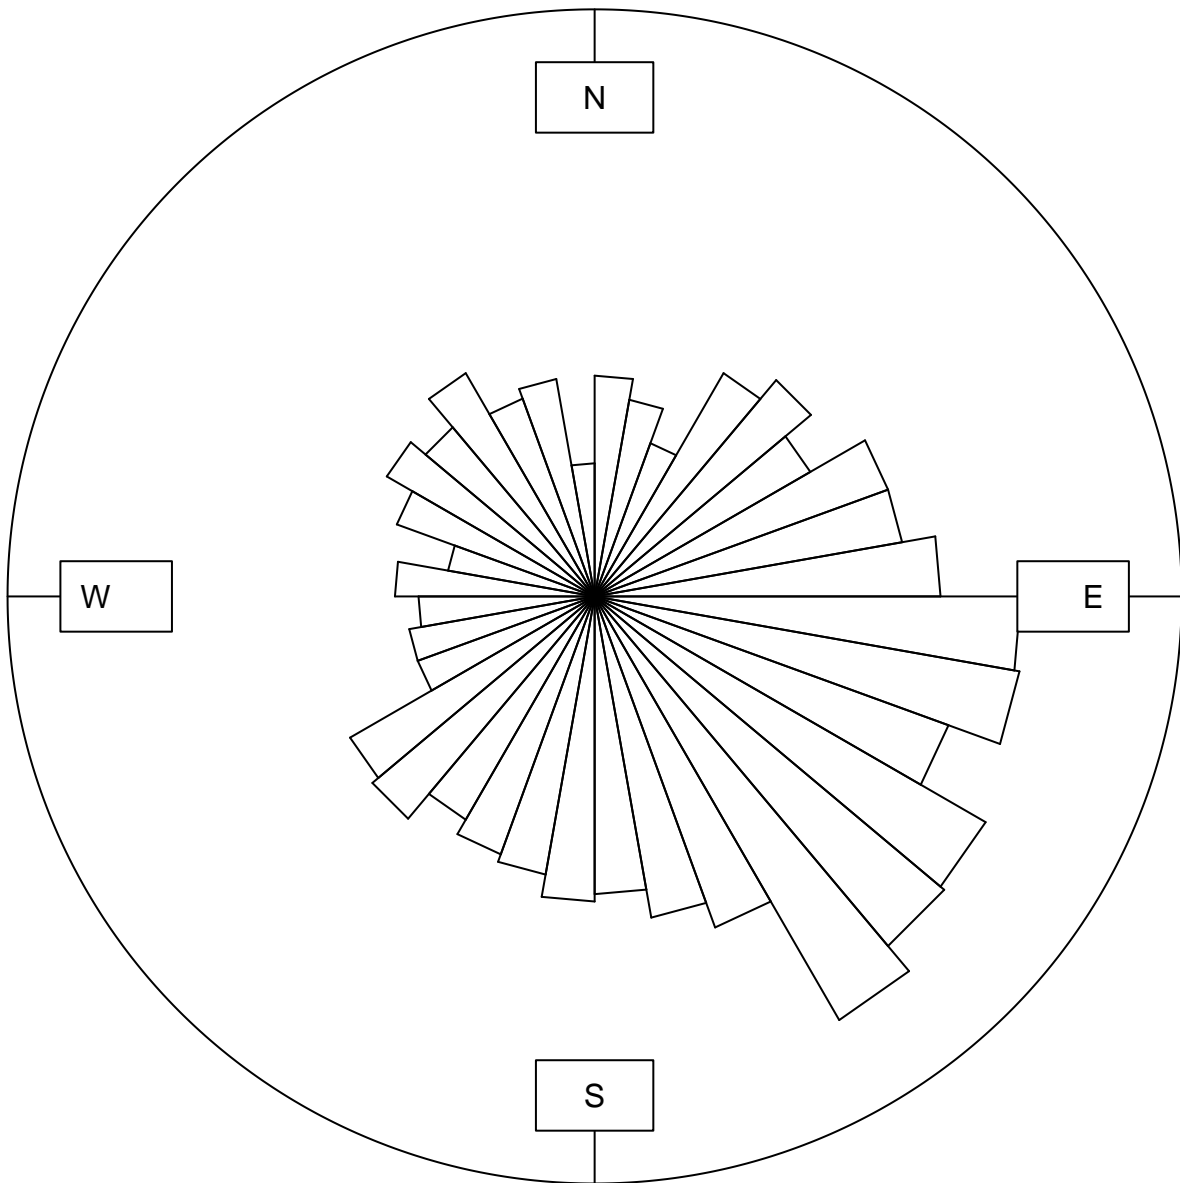

# bootstrap 596

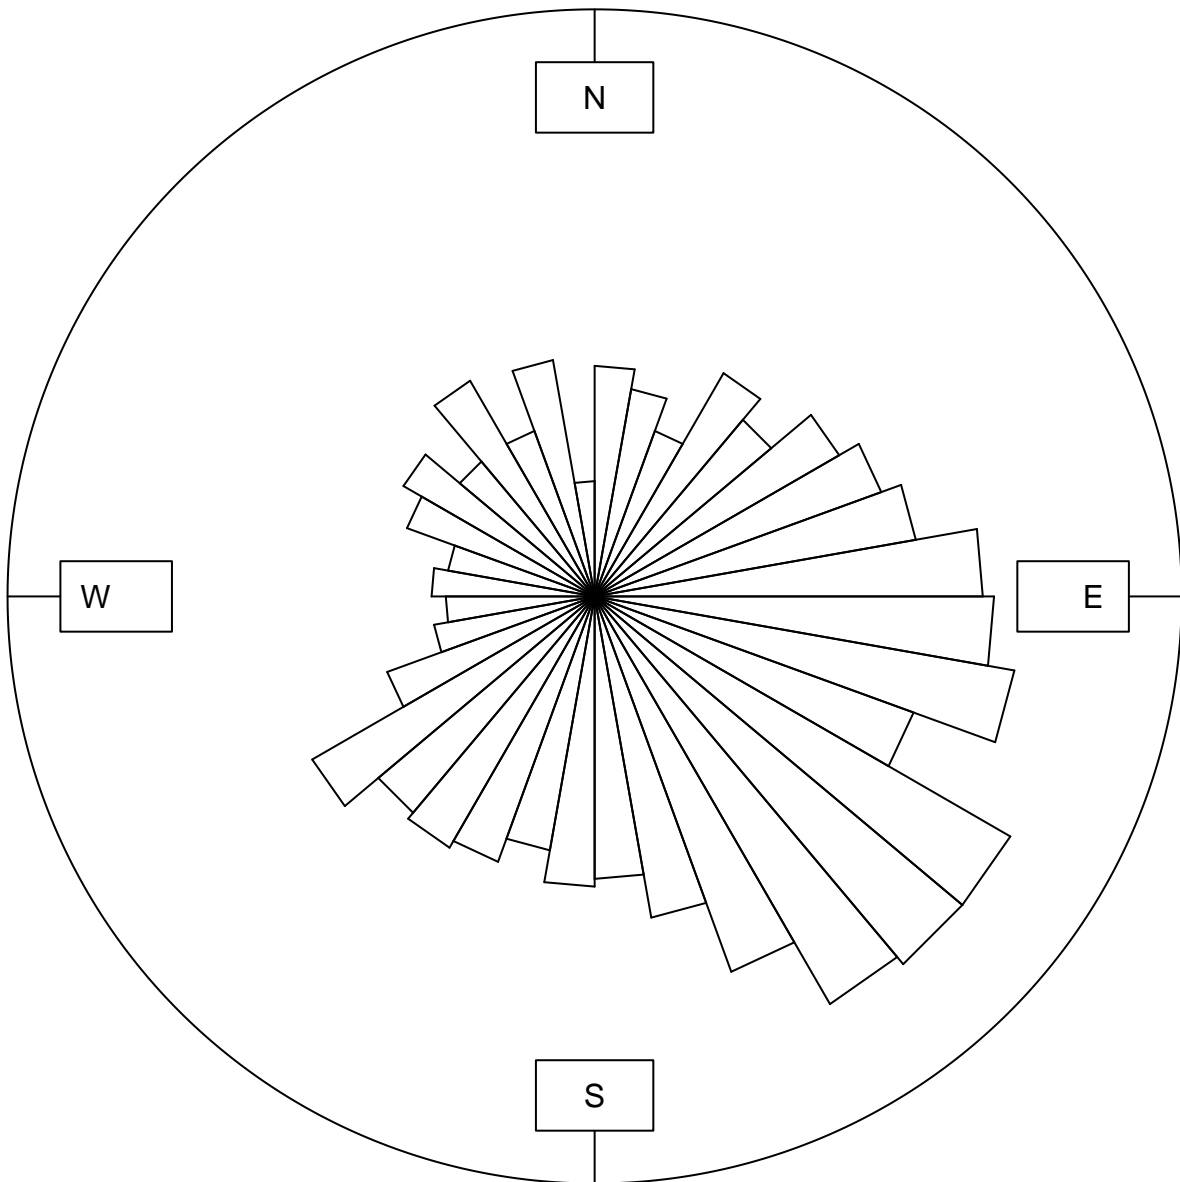

# bootstrap 597

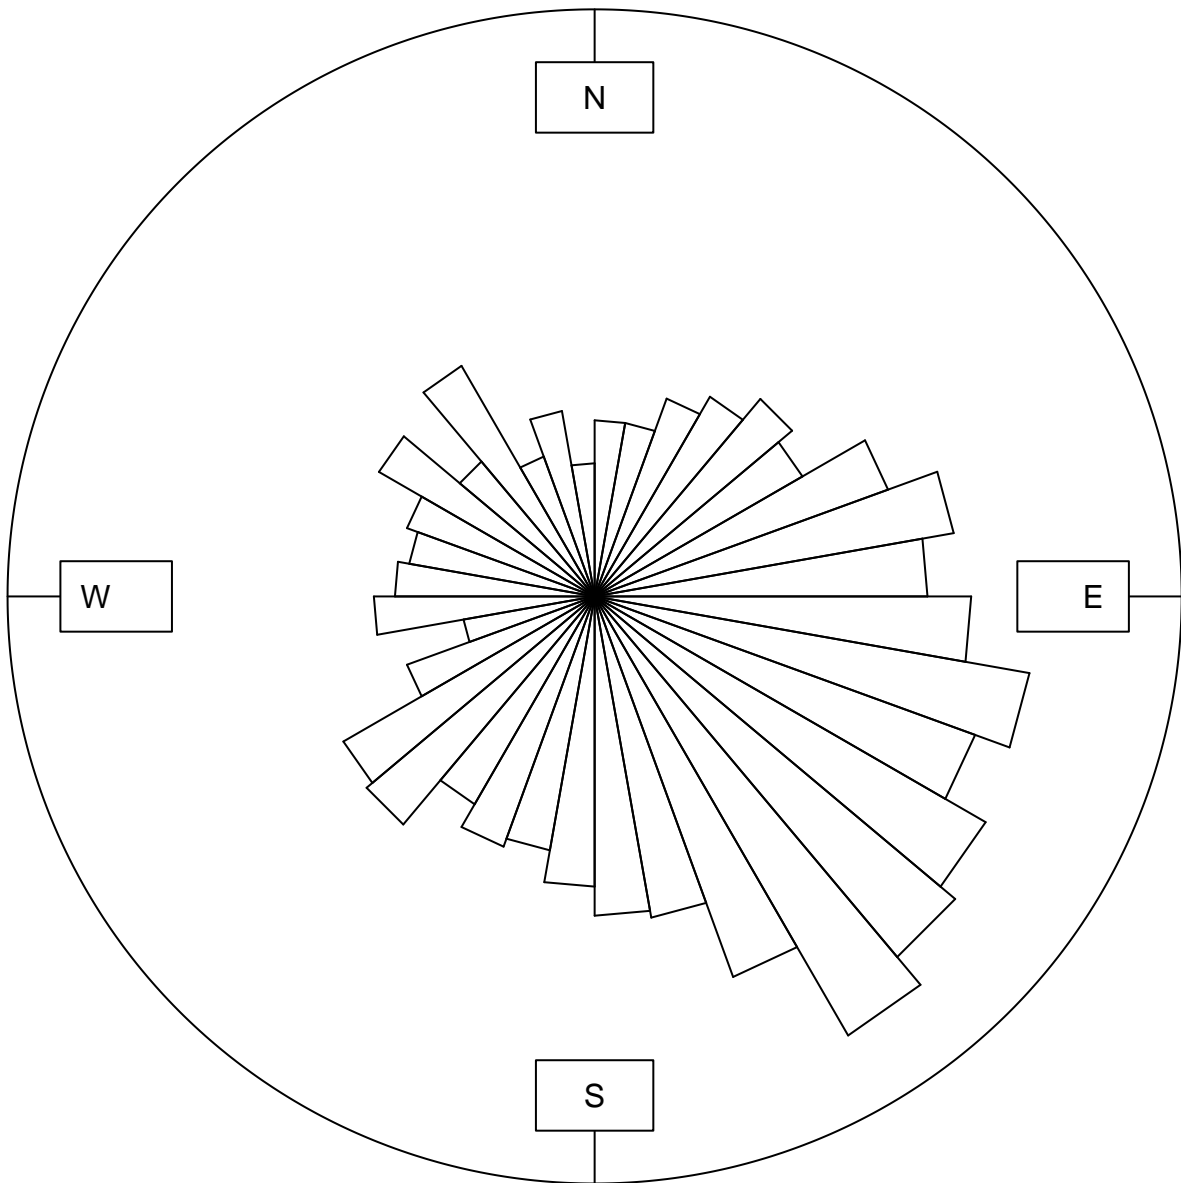

# bootstrap 598

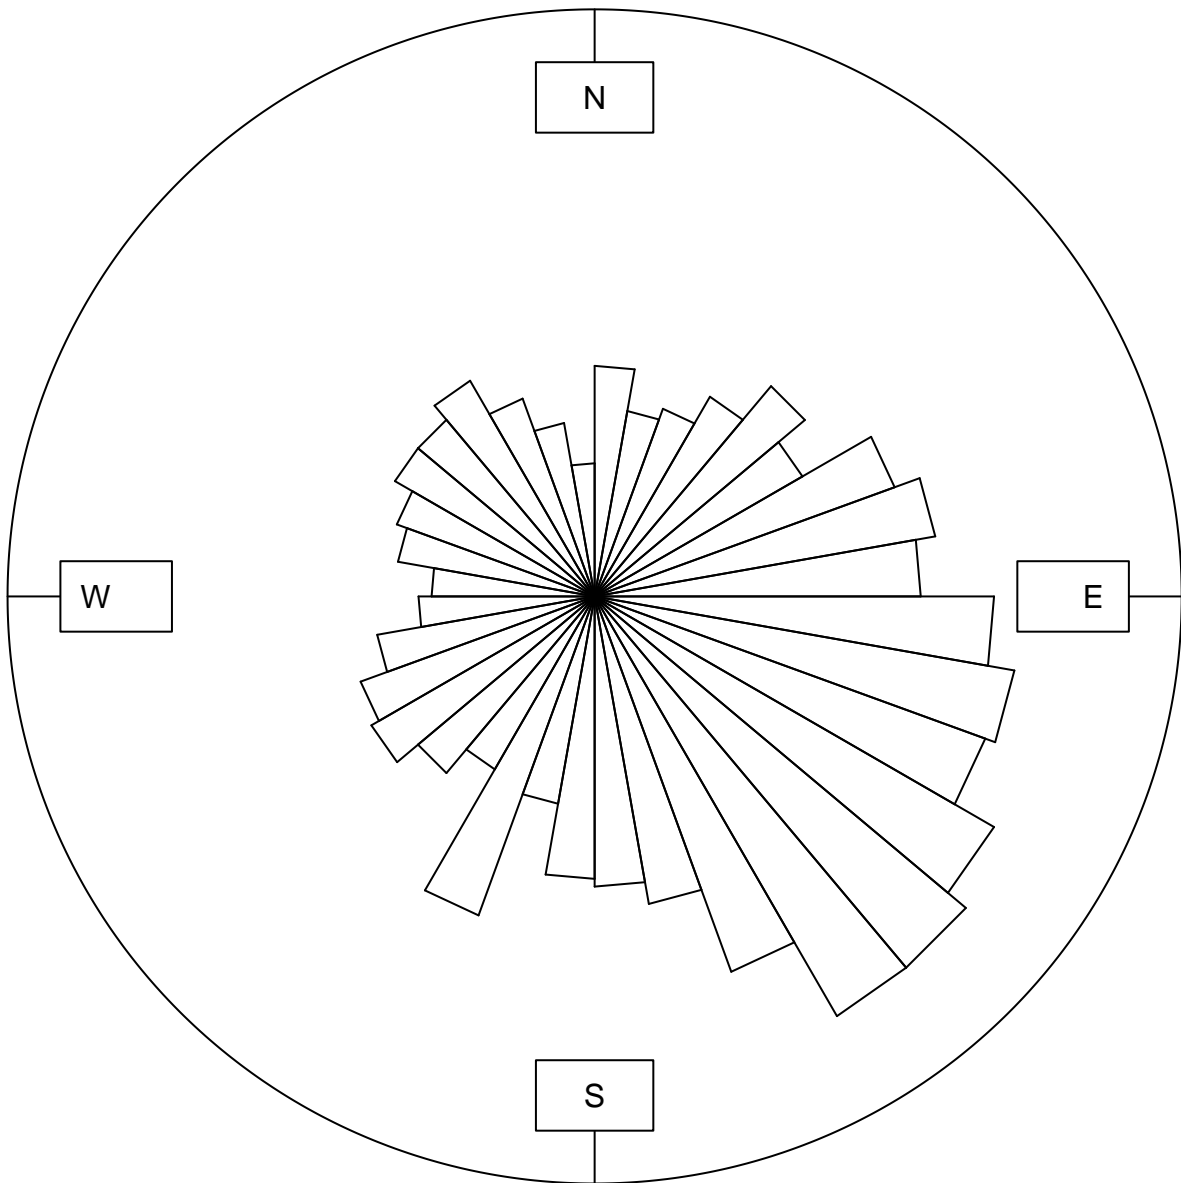

# bootstrap 599

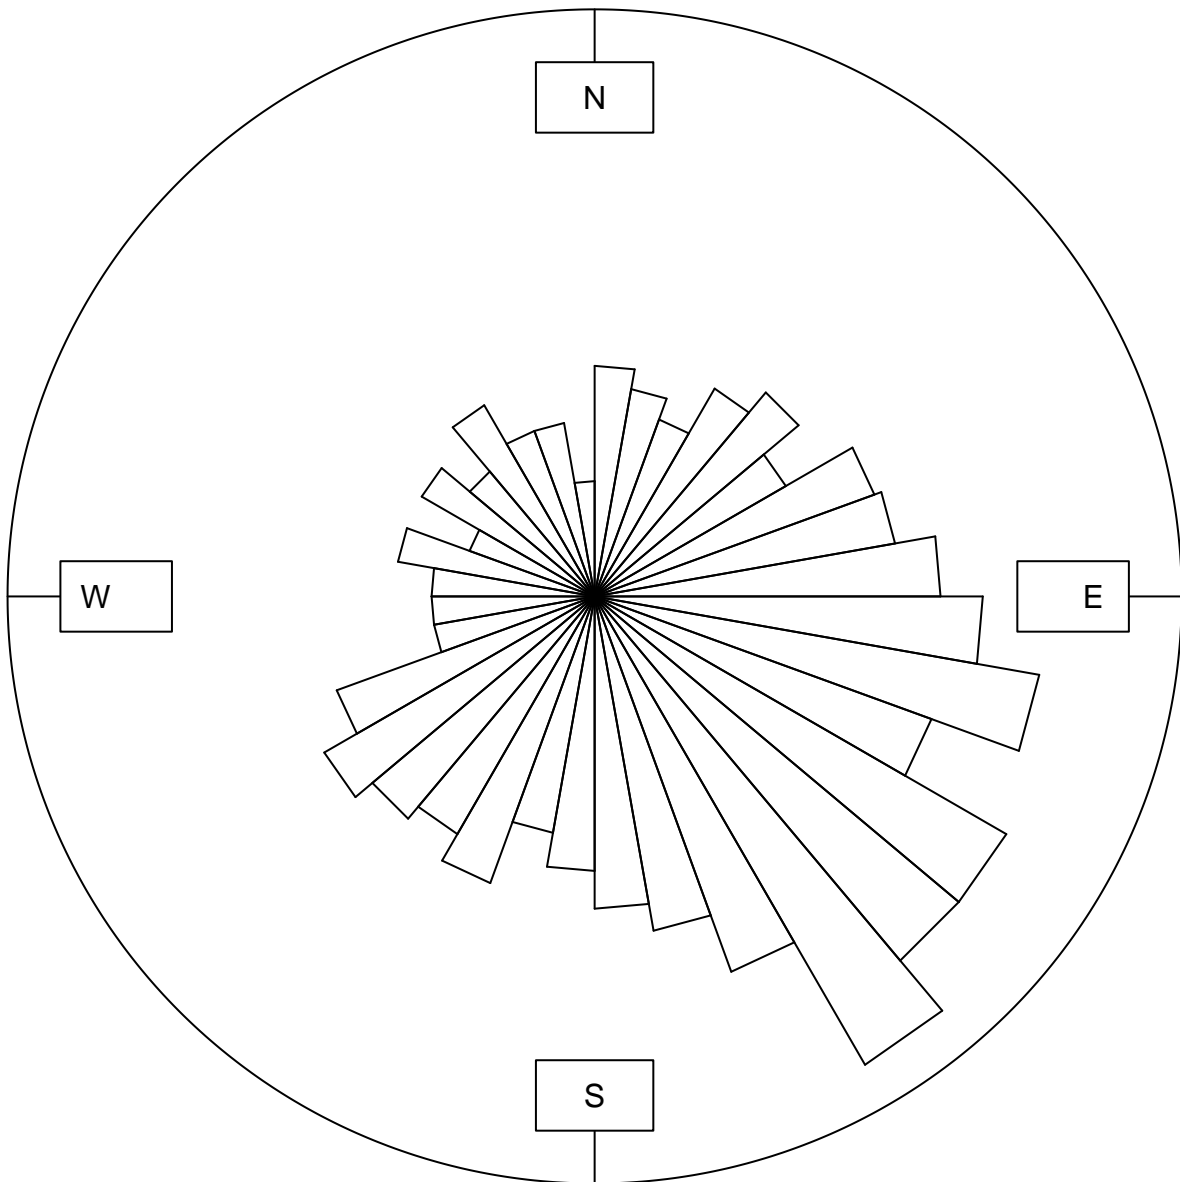

**bootstrap 600**

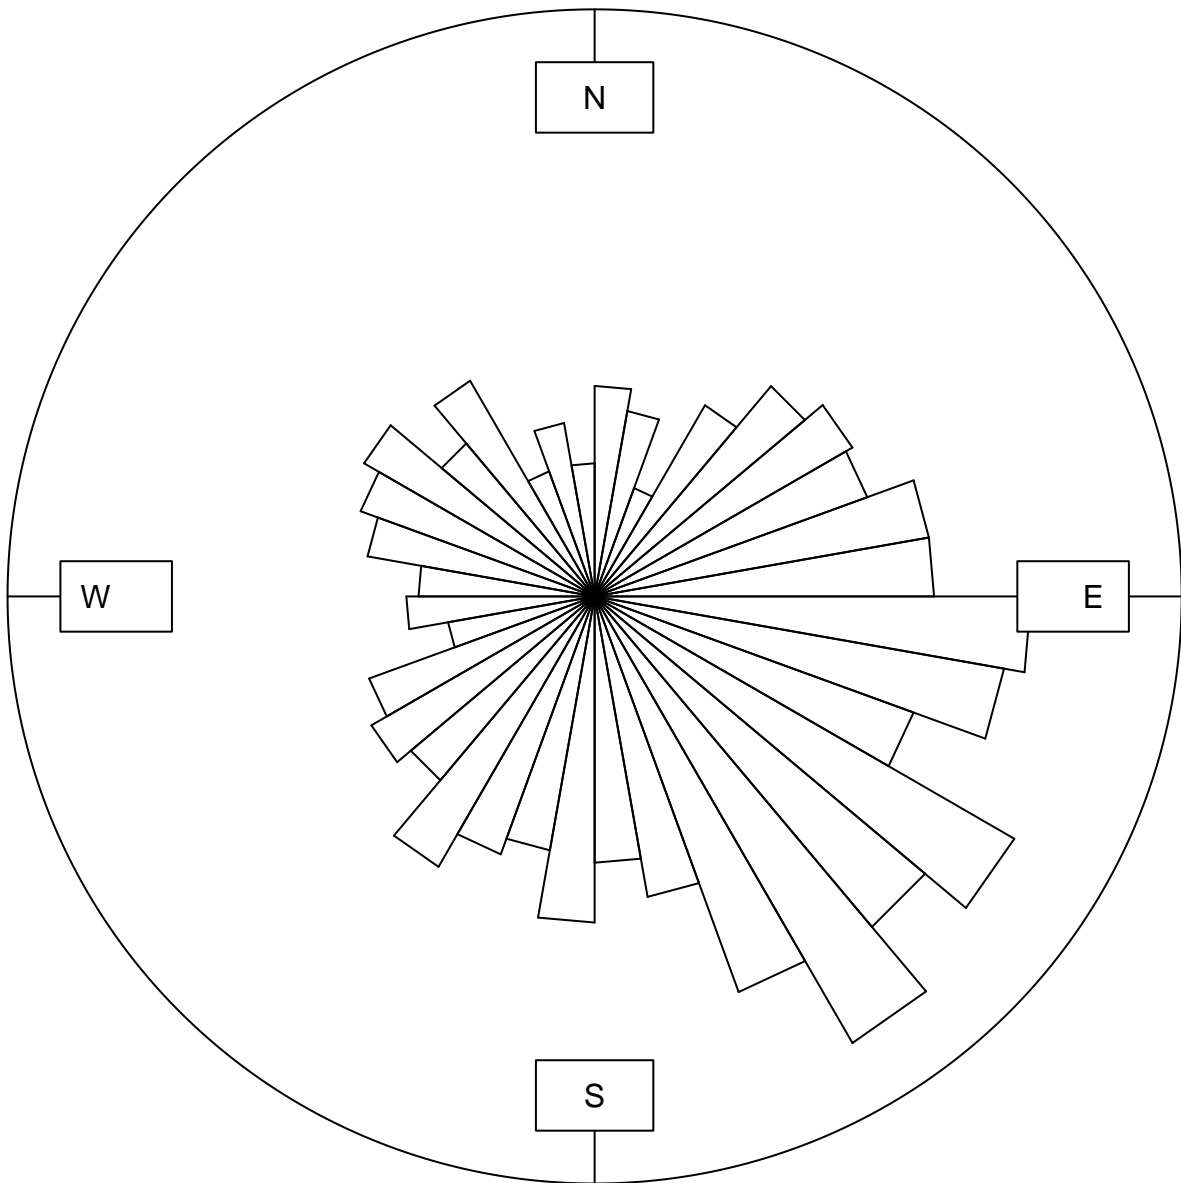



# bootstrap 601

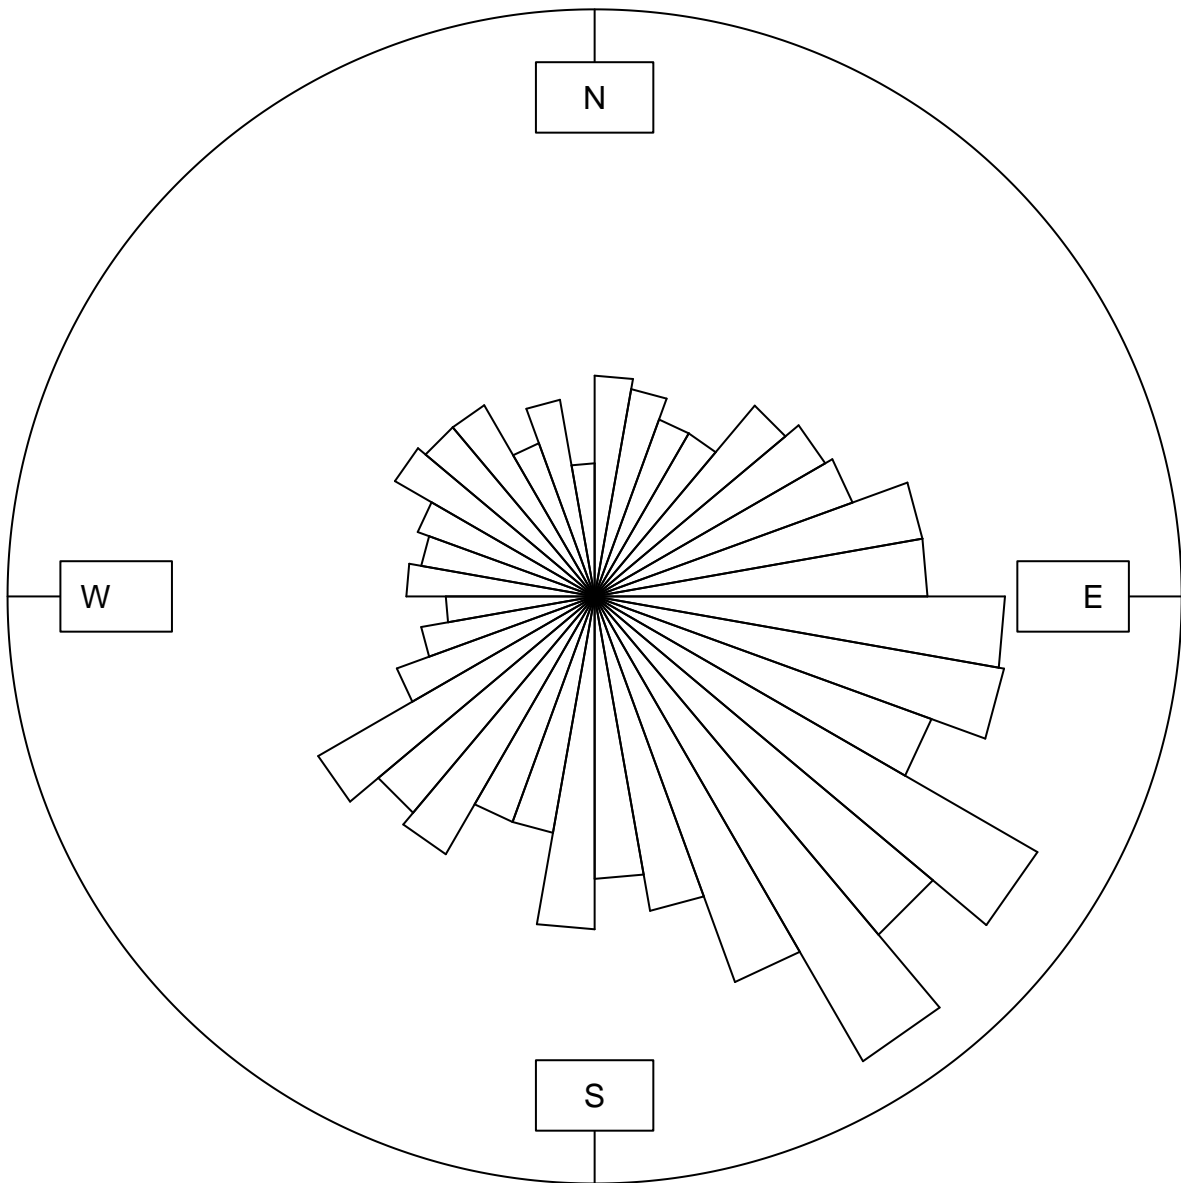

# bootstrap 602

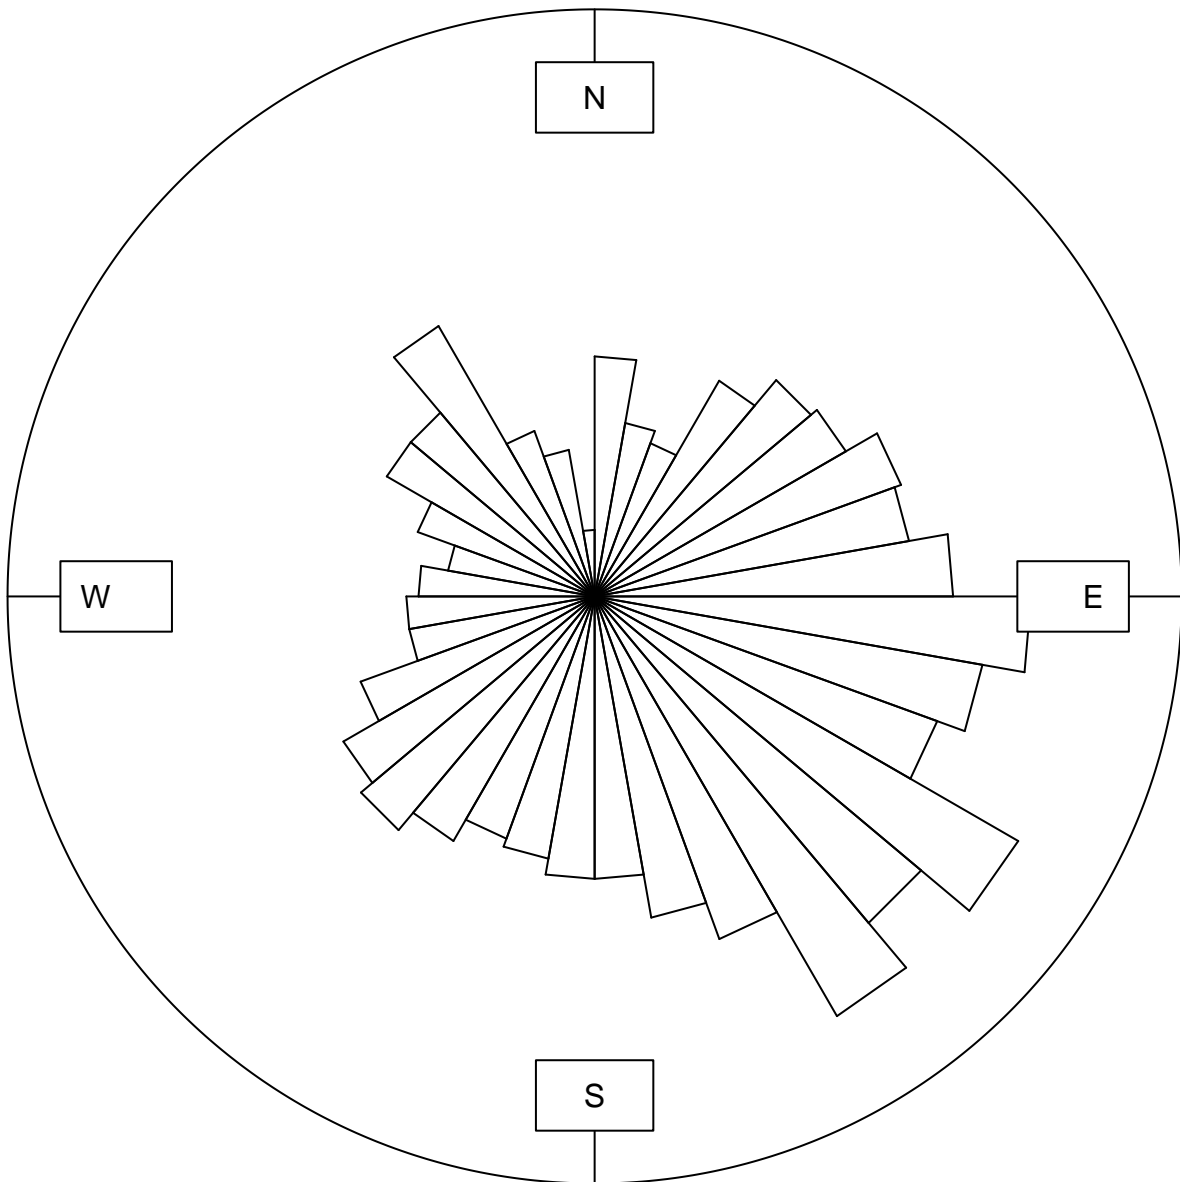

# bootstrap 603

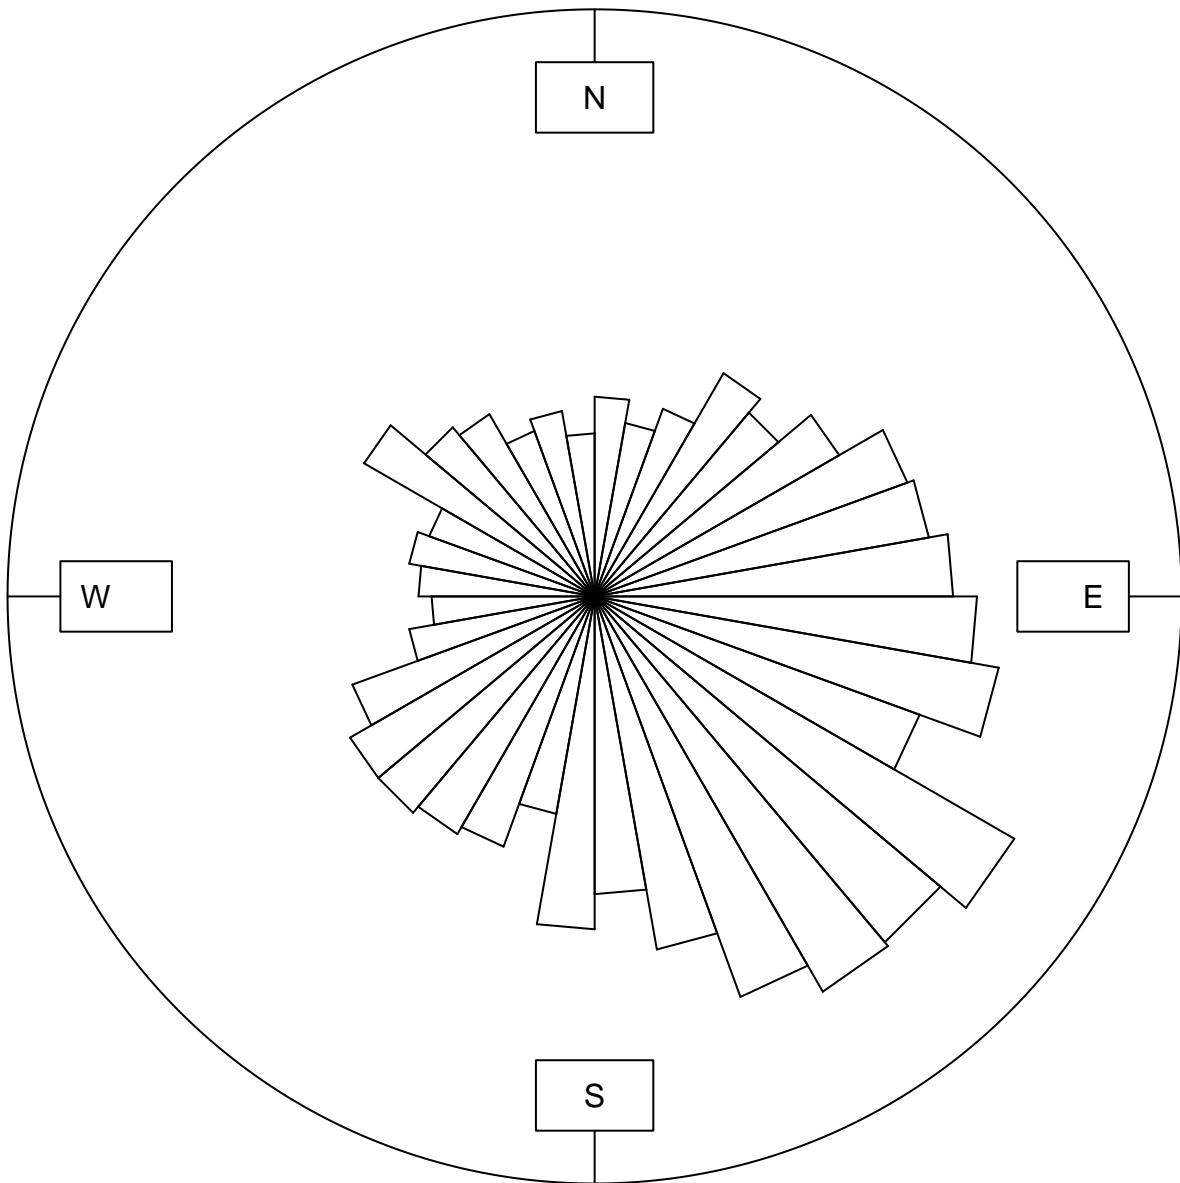

# bootstrap 604

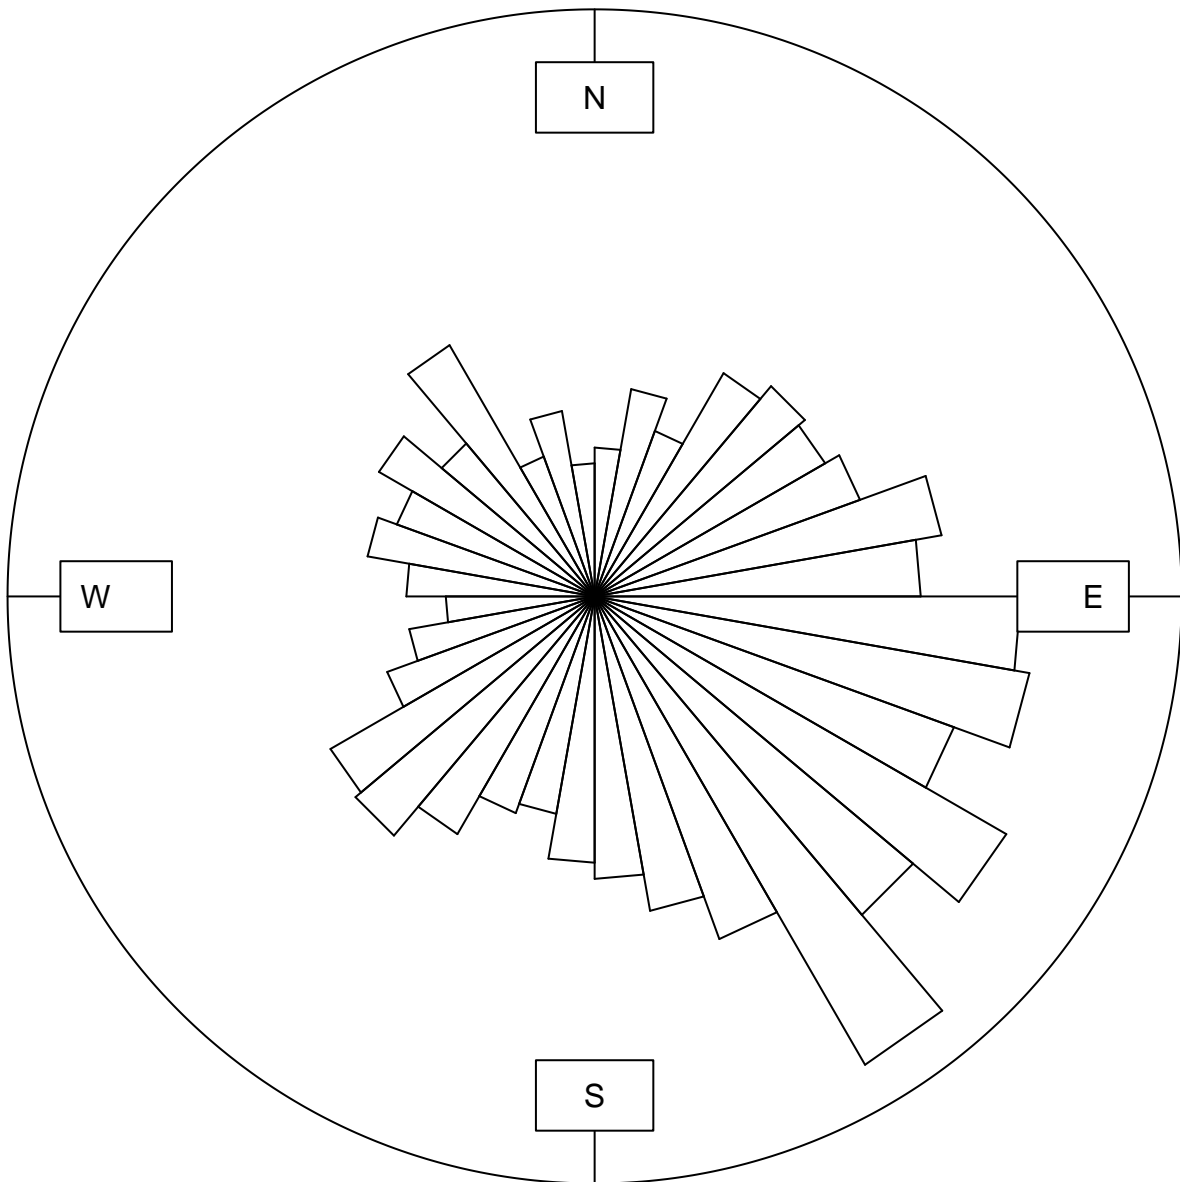

# bootstrap 605

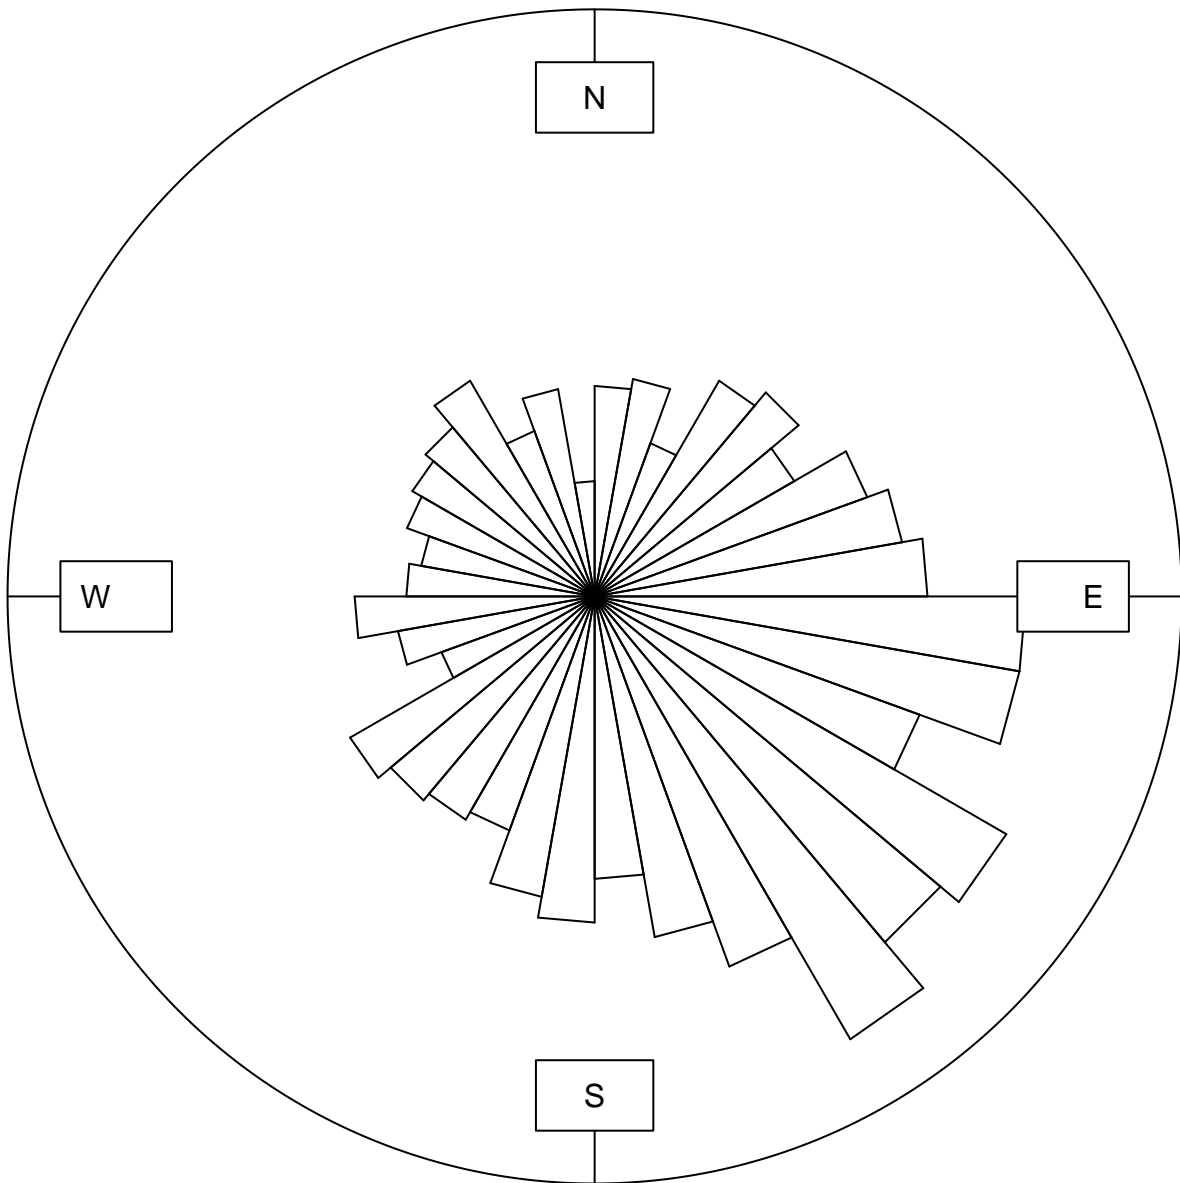

# bootstrap 606

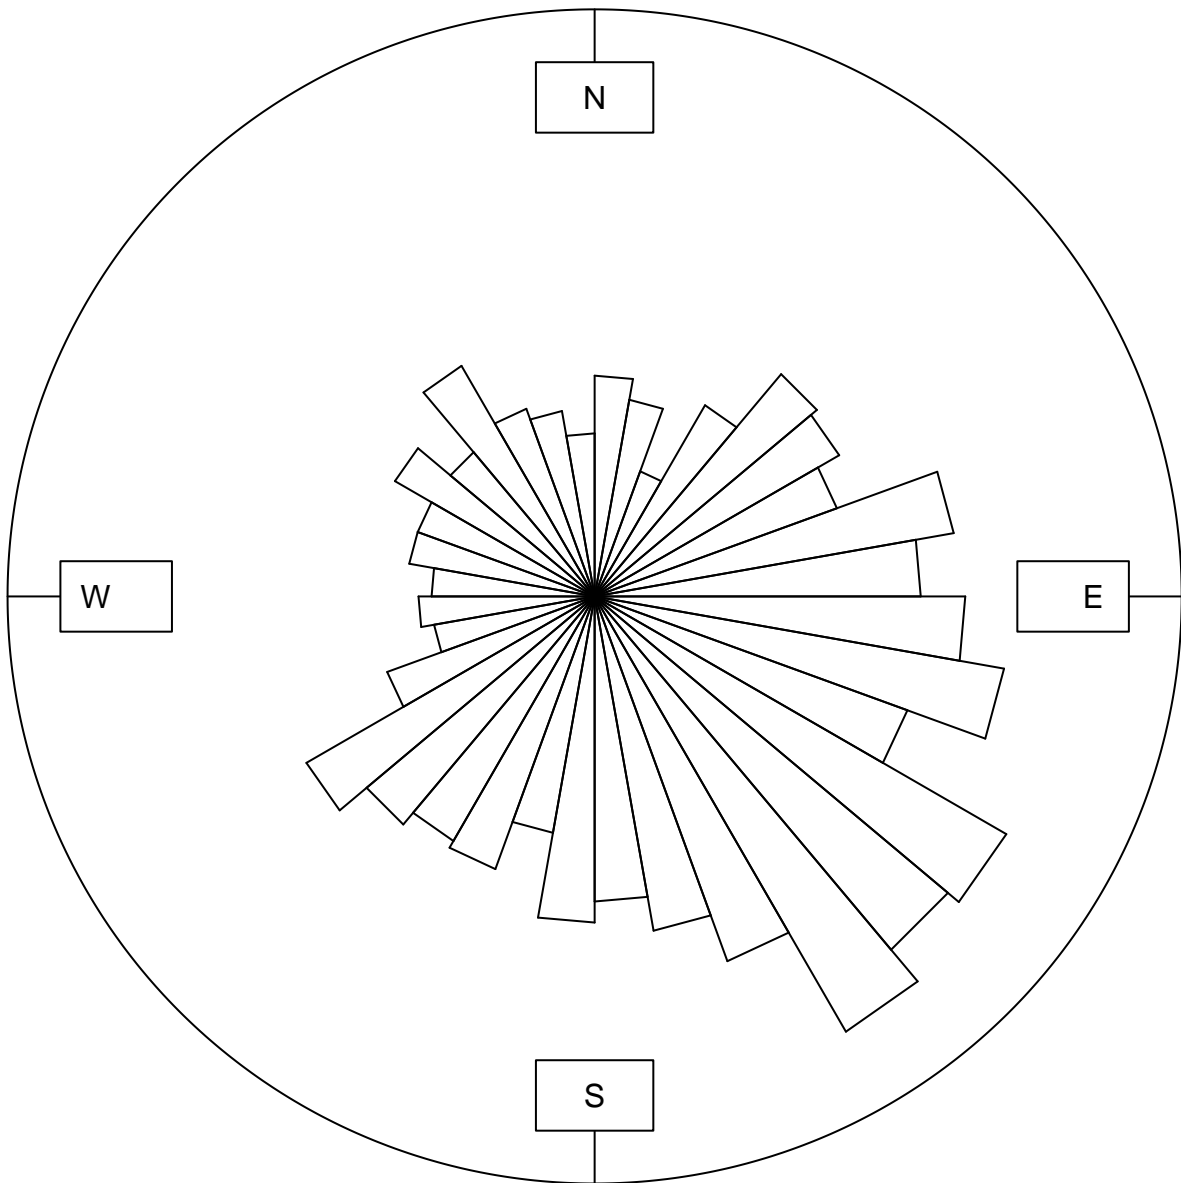

# bootstrap 607

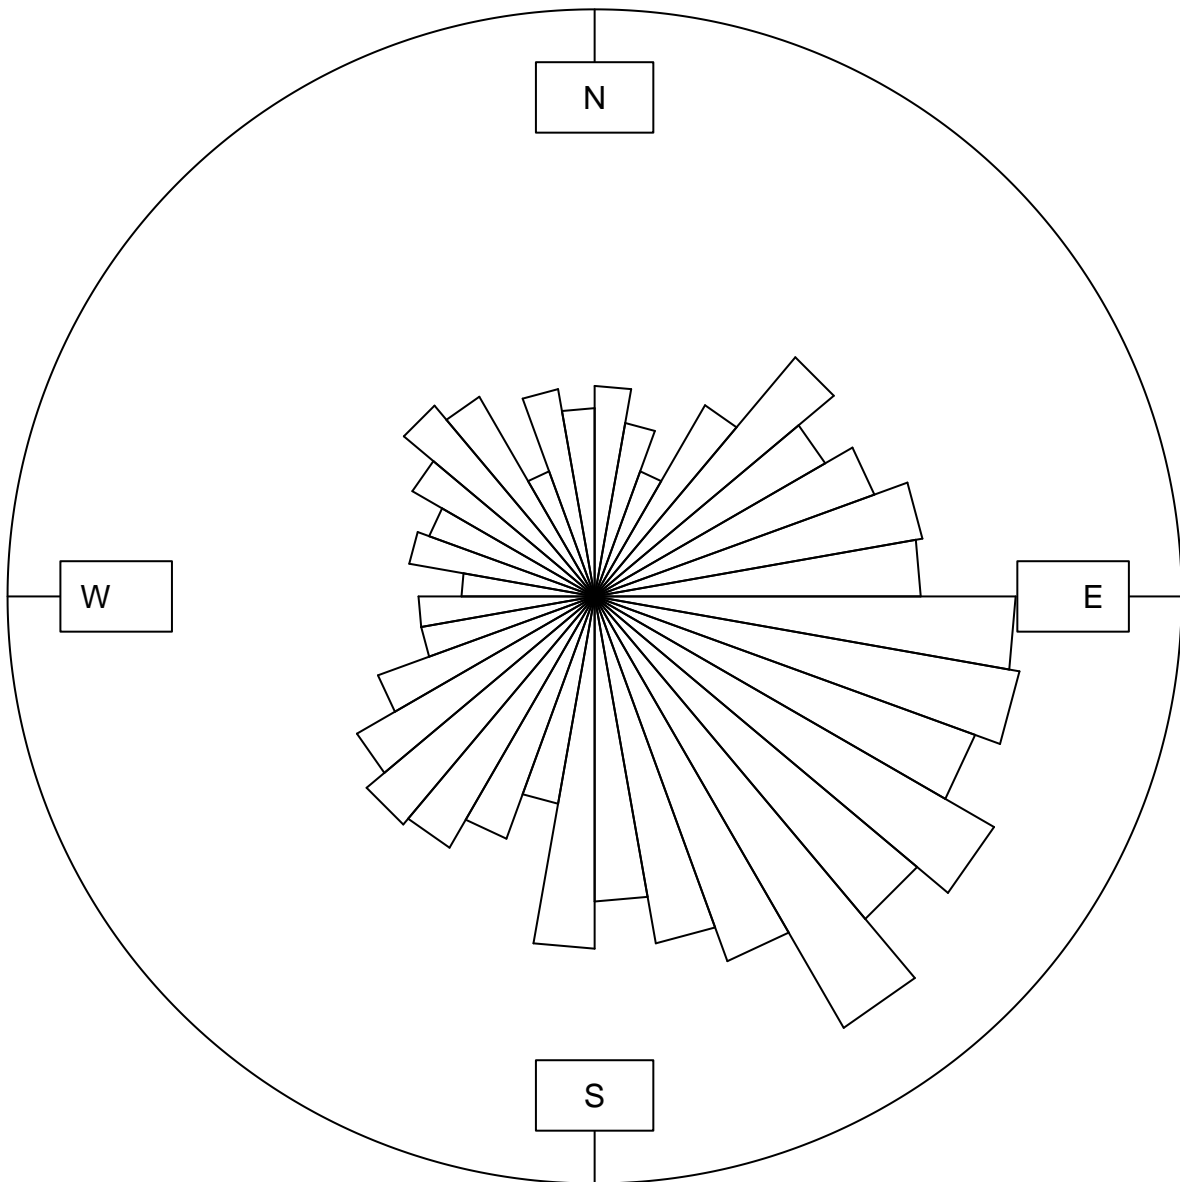

# bootstrap 608

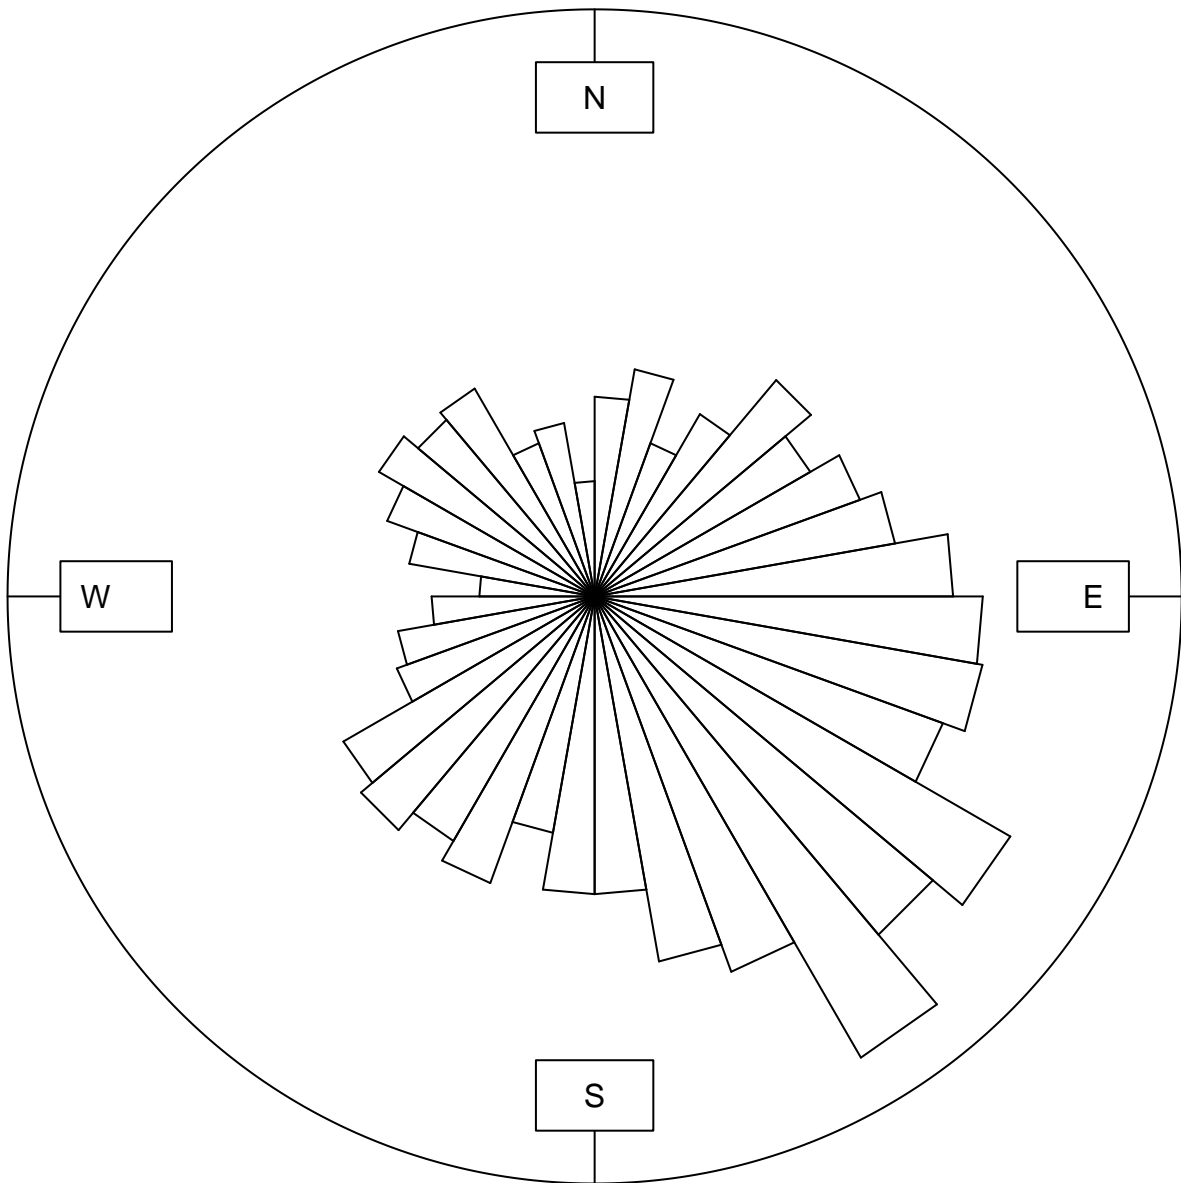



# bootstrap 609

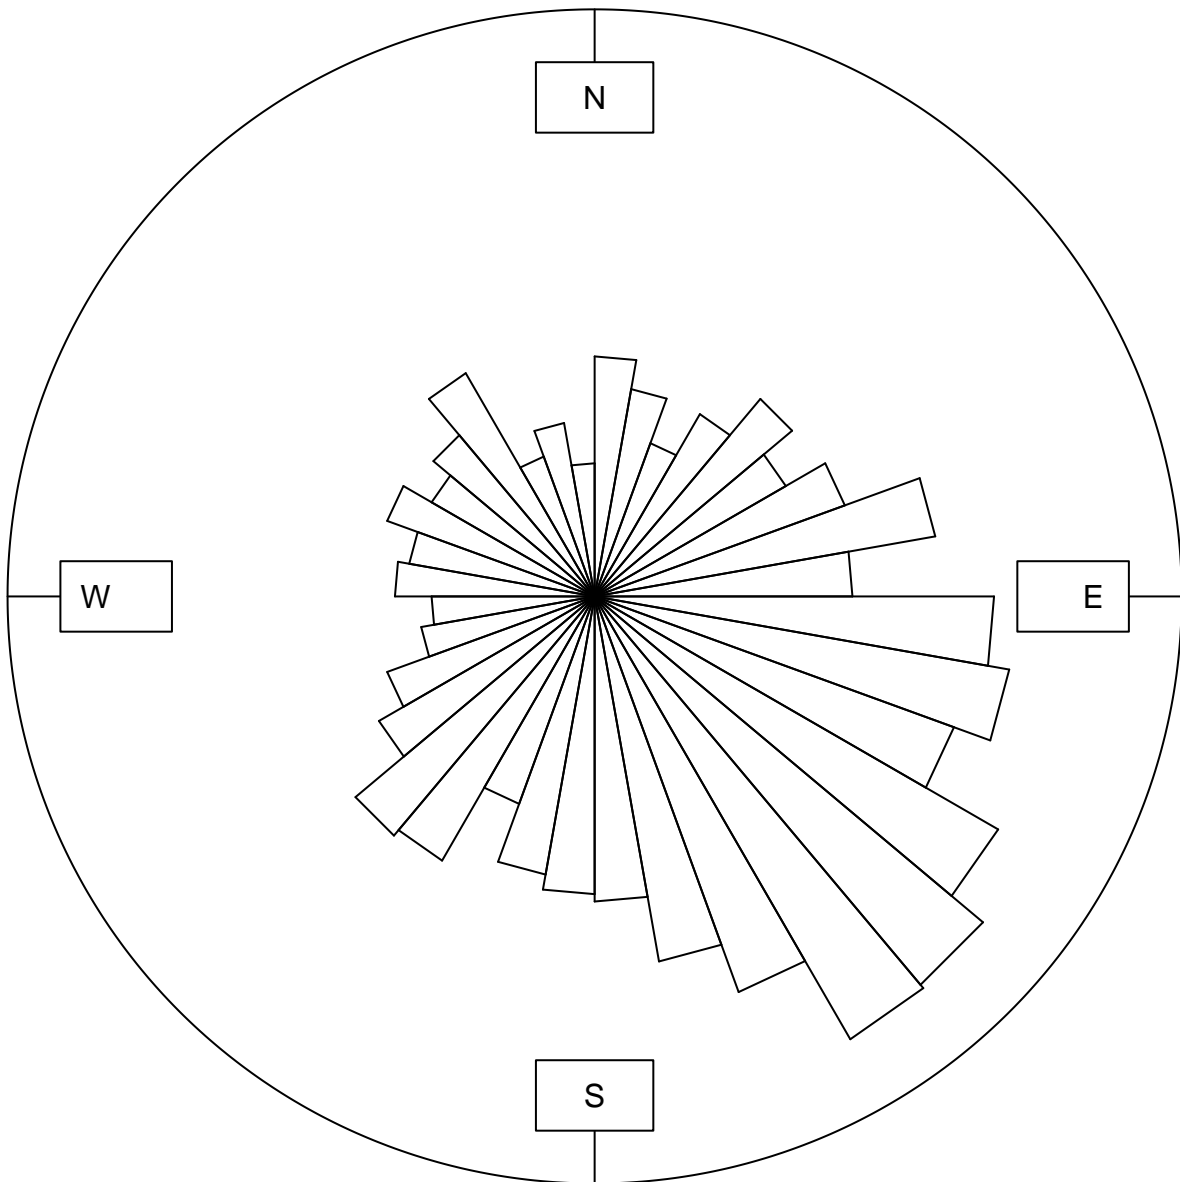

# bootstrap 610

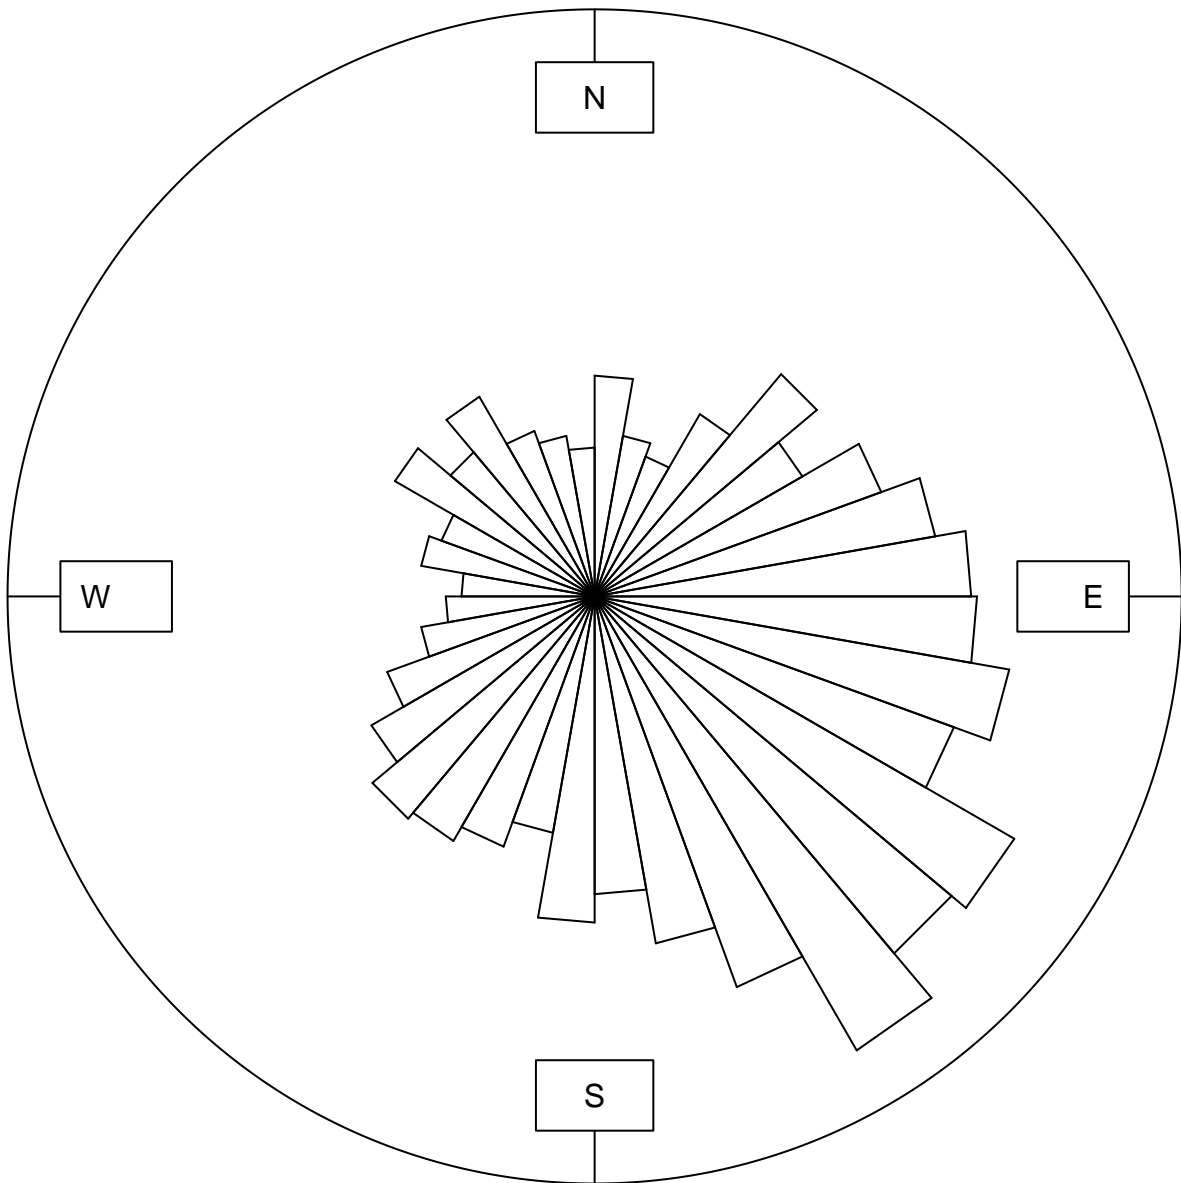

# bootstrap 611

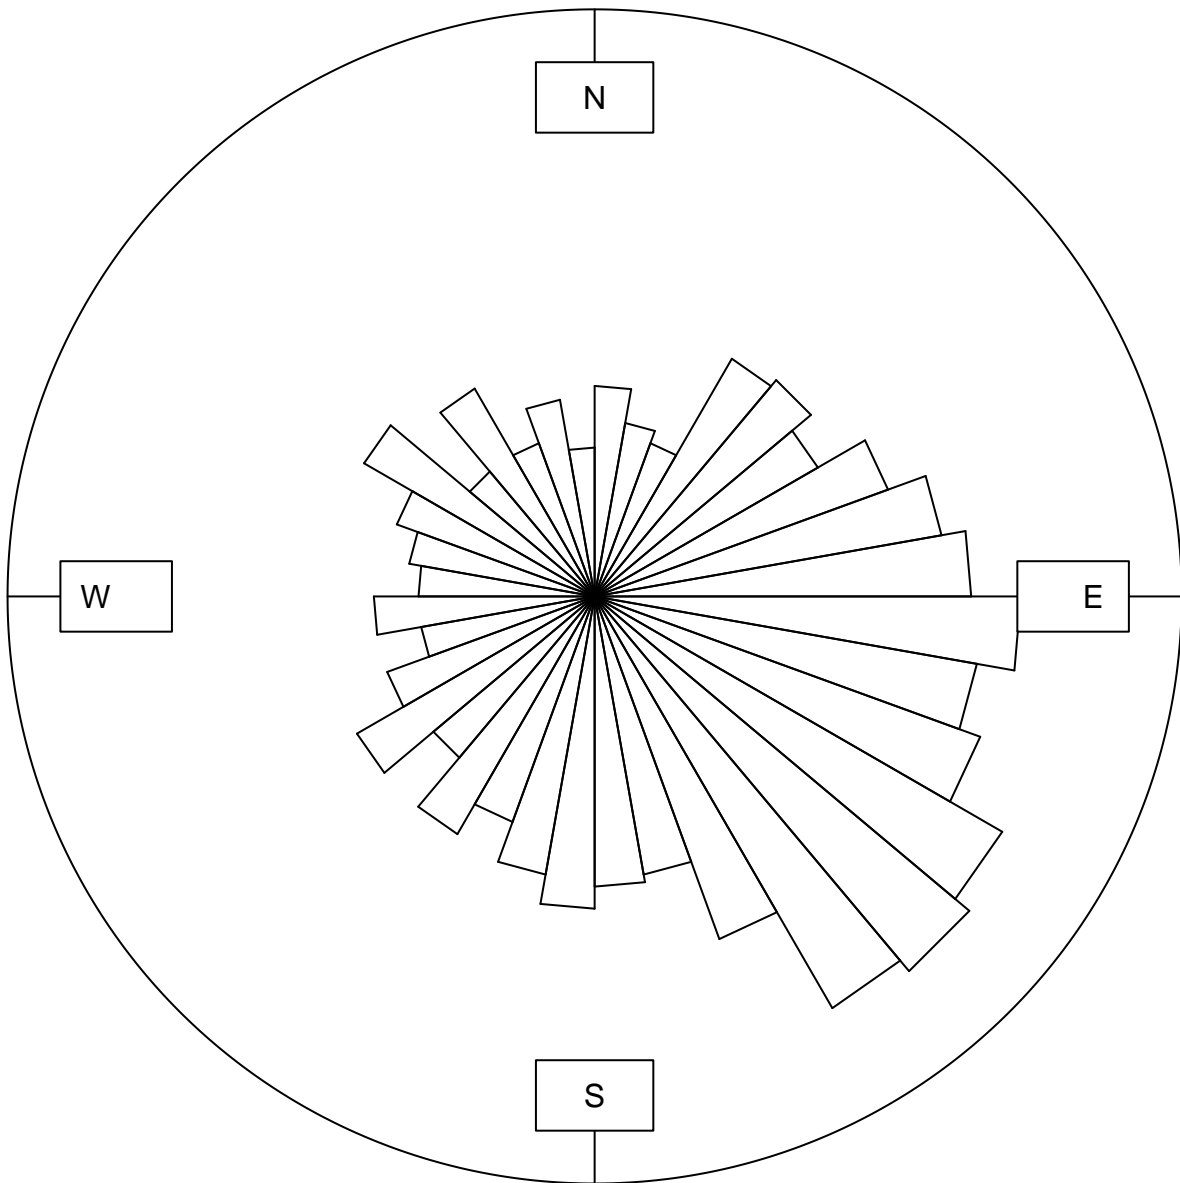

# bootstrap 612

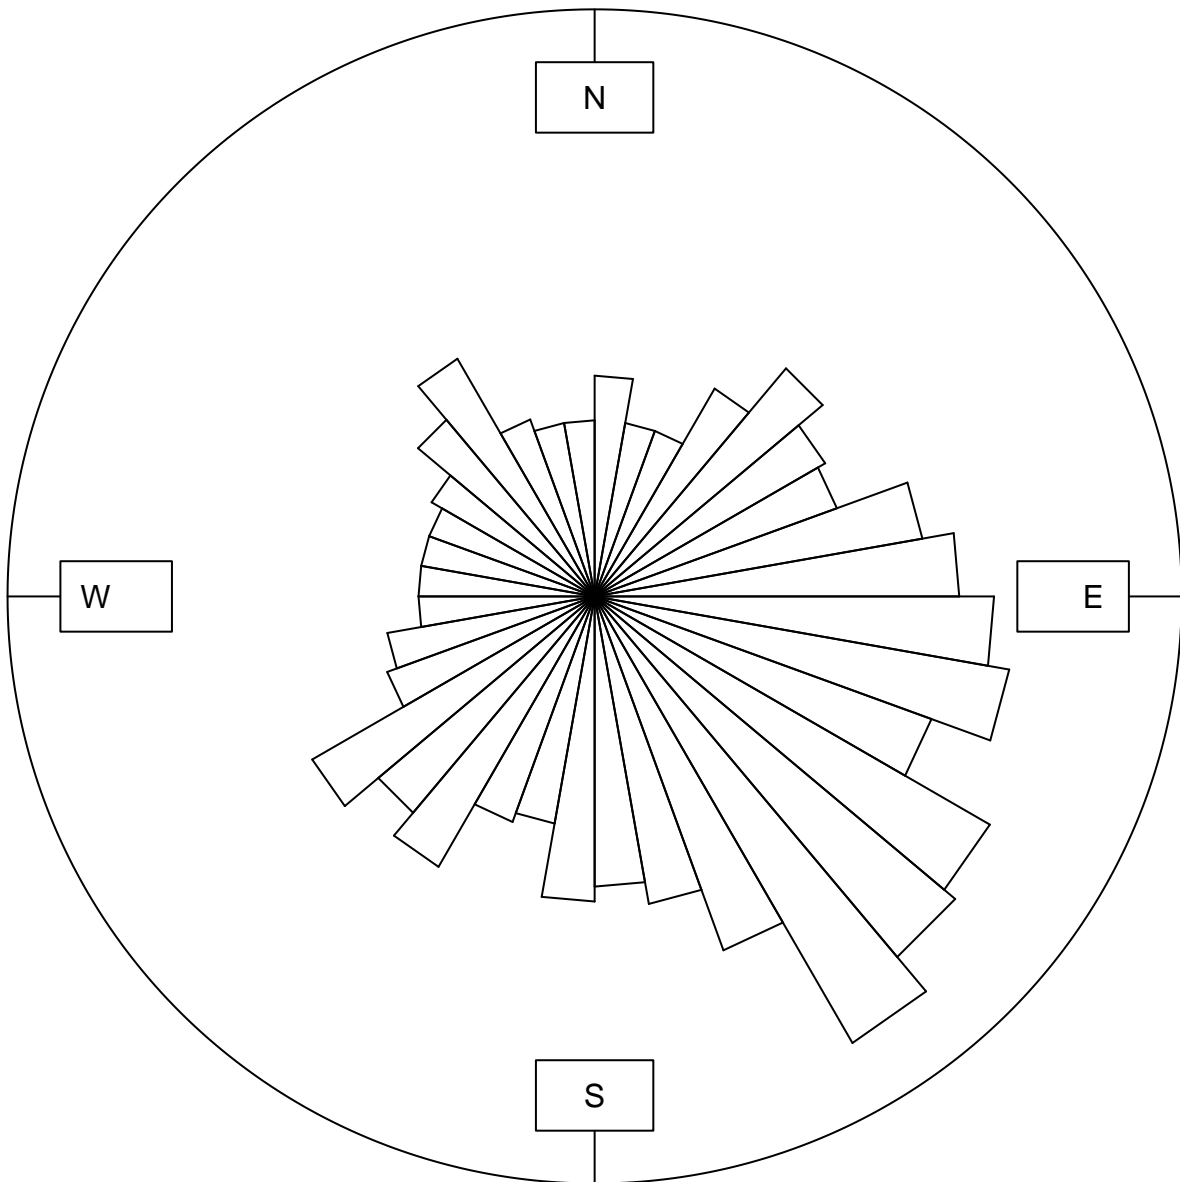

# bootstrap 613

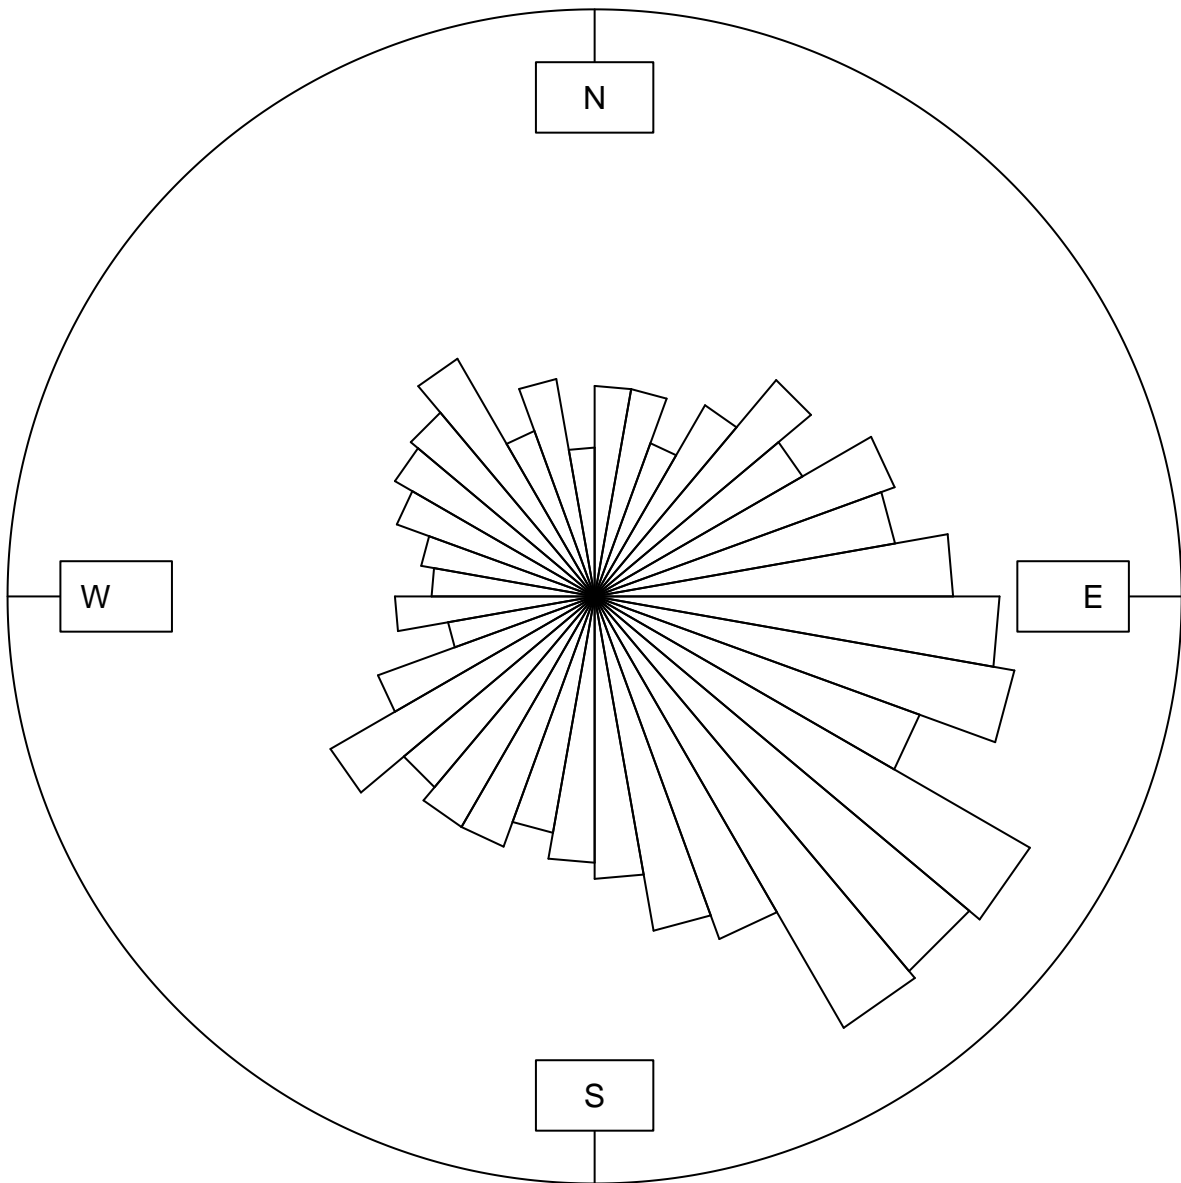

# bootstrap 614

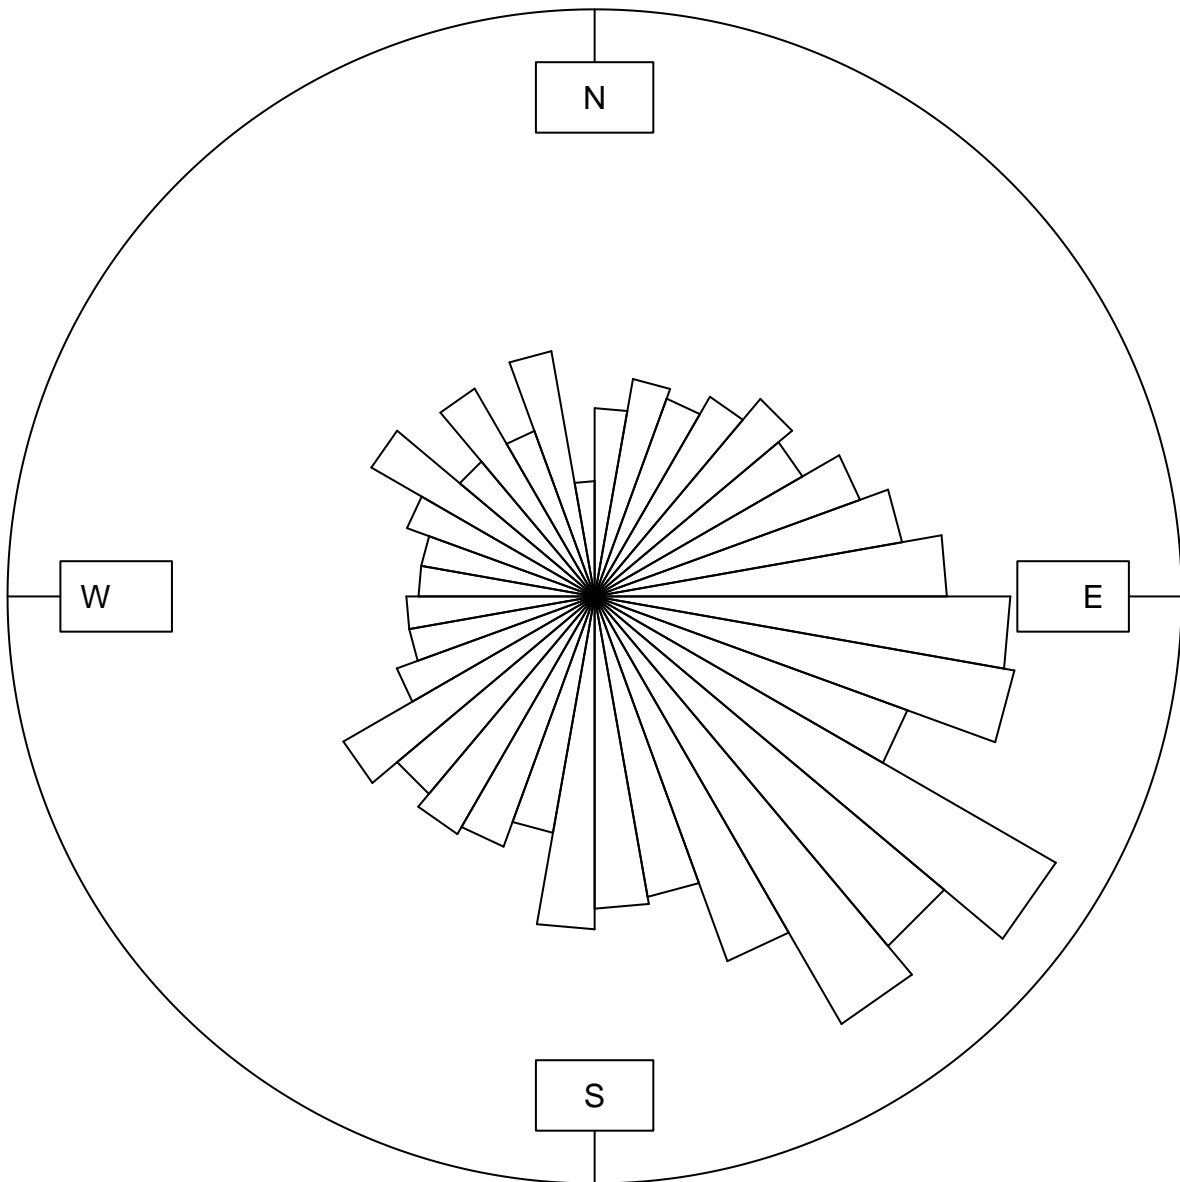

# bootstrap 615

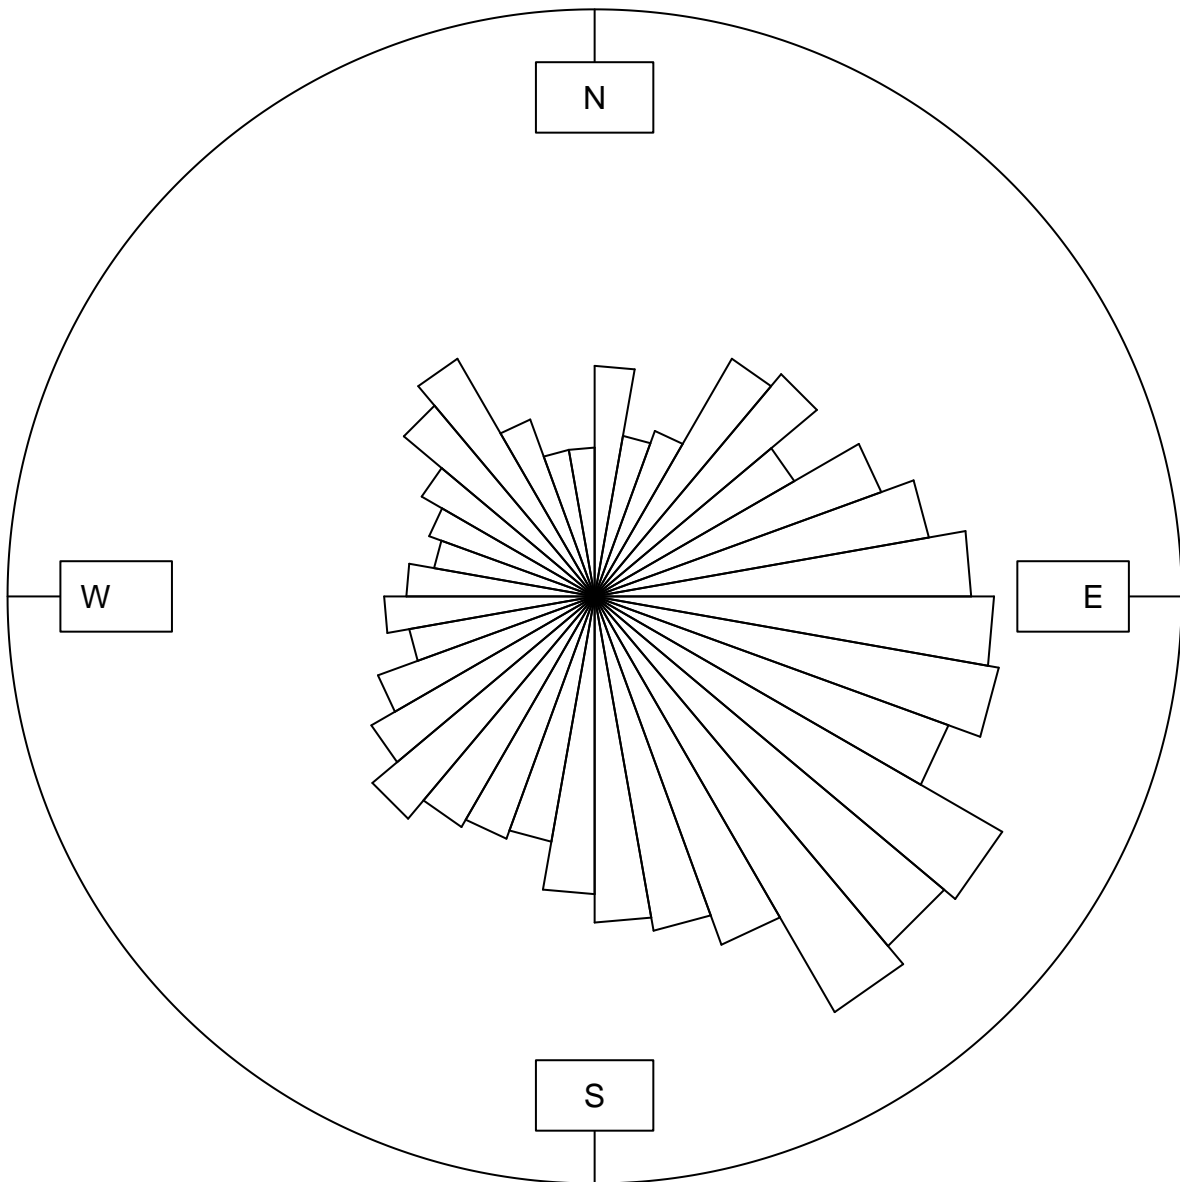

# bootstrap 616

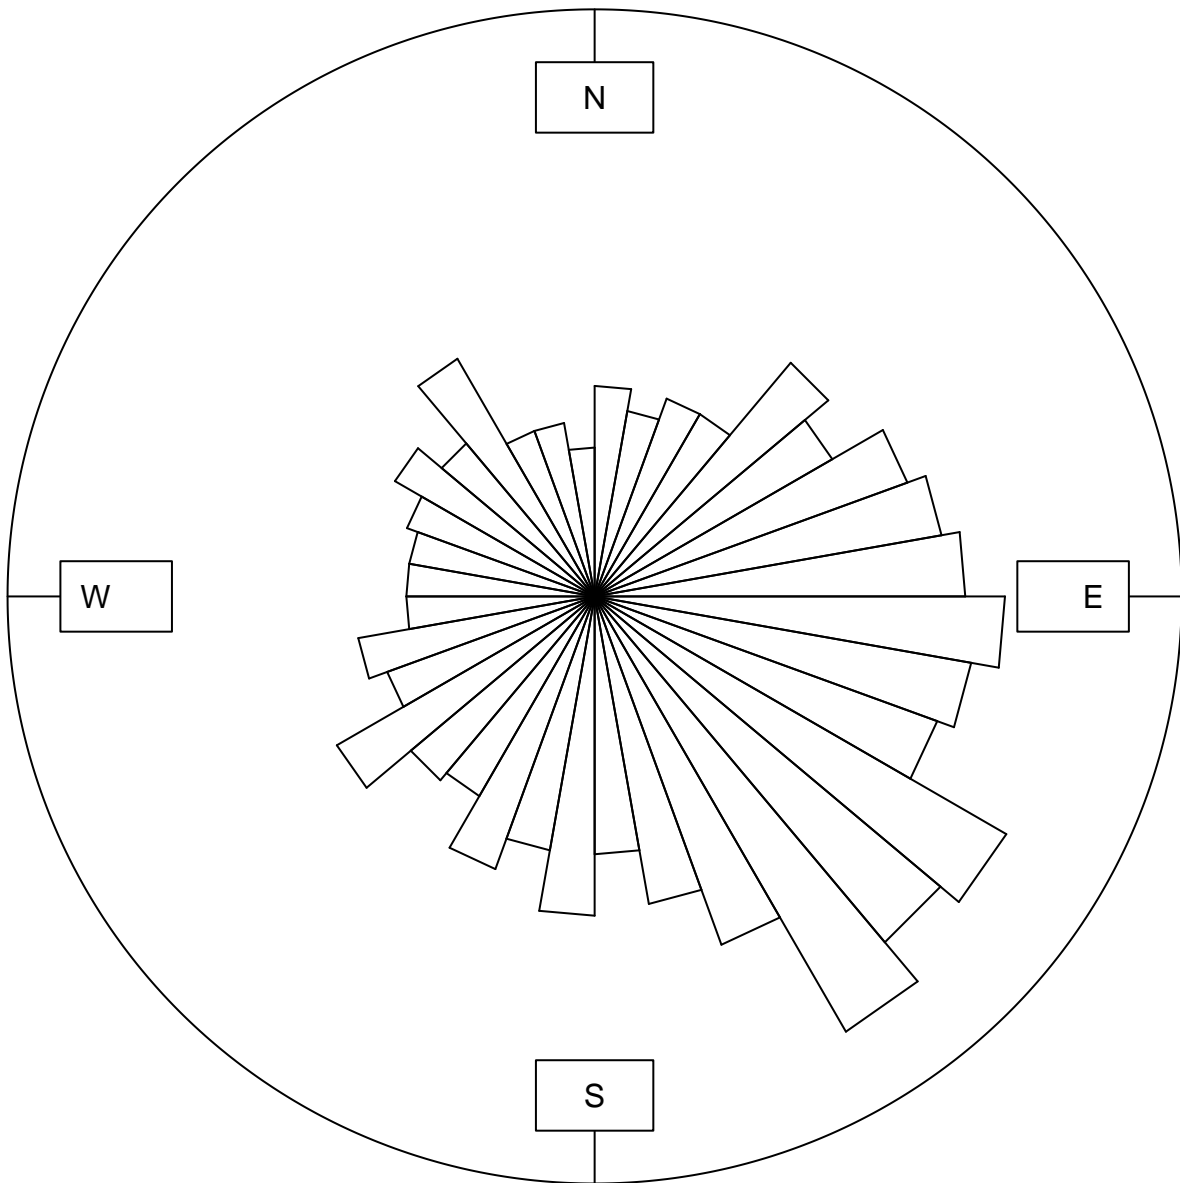



# bootstrap 617

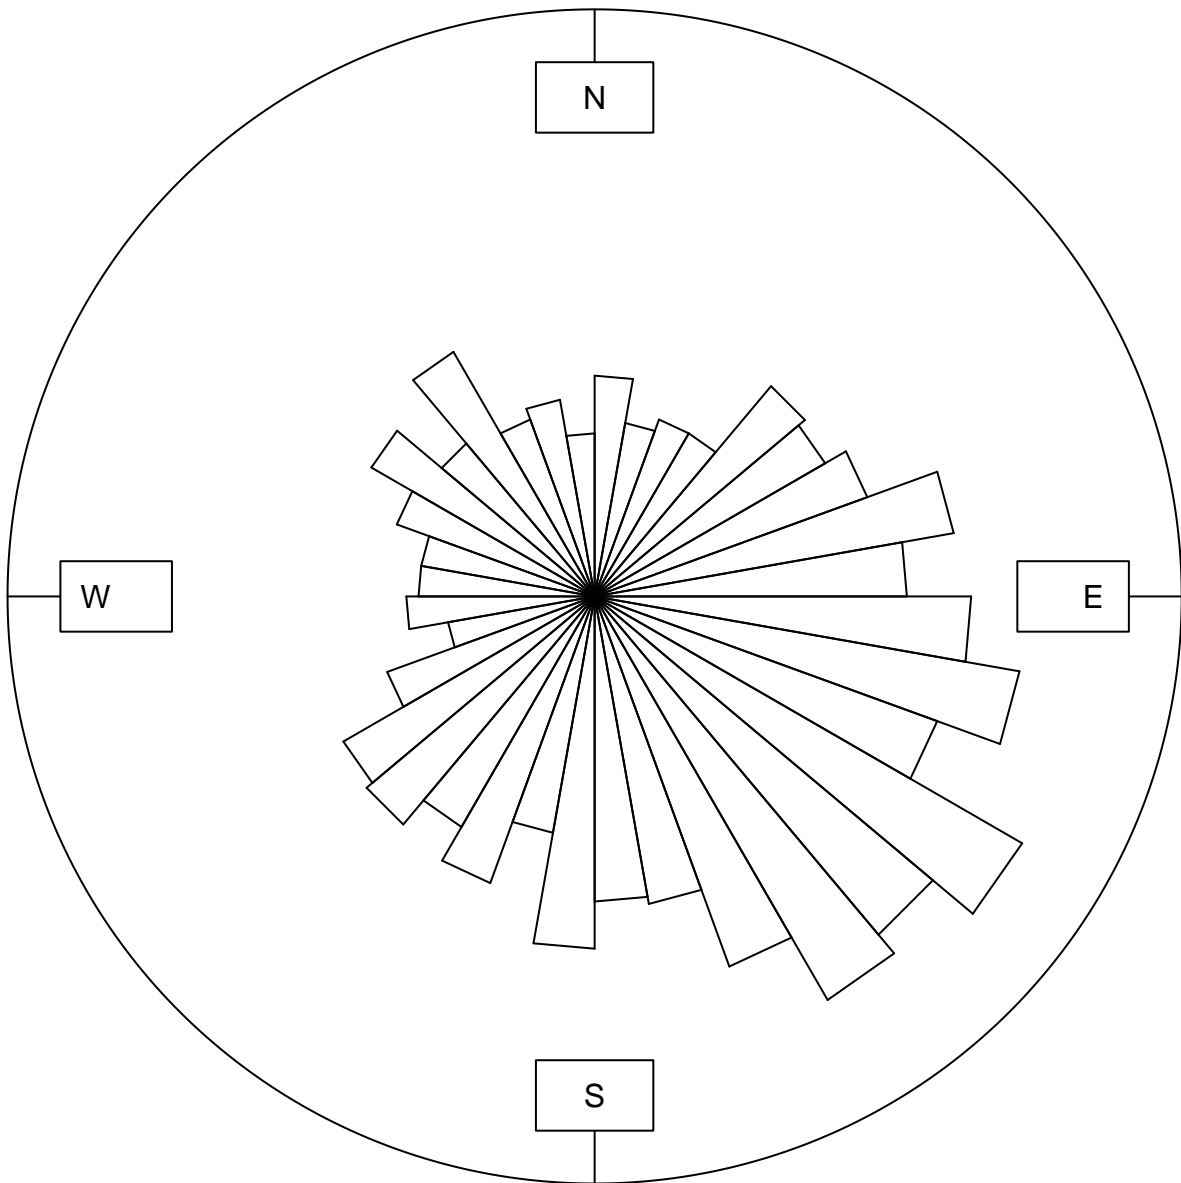

# bootstrap 618

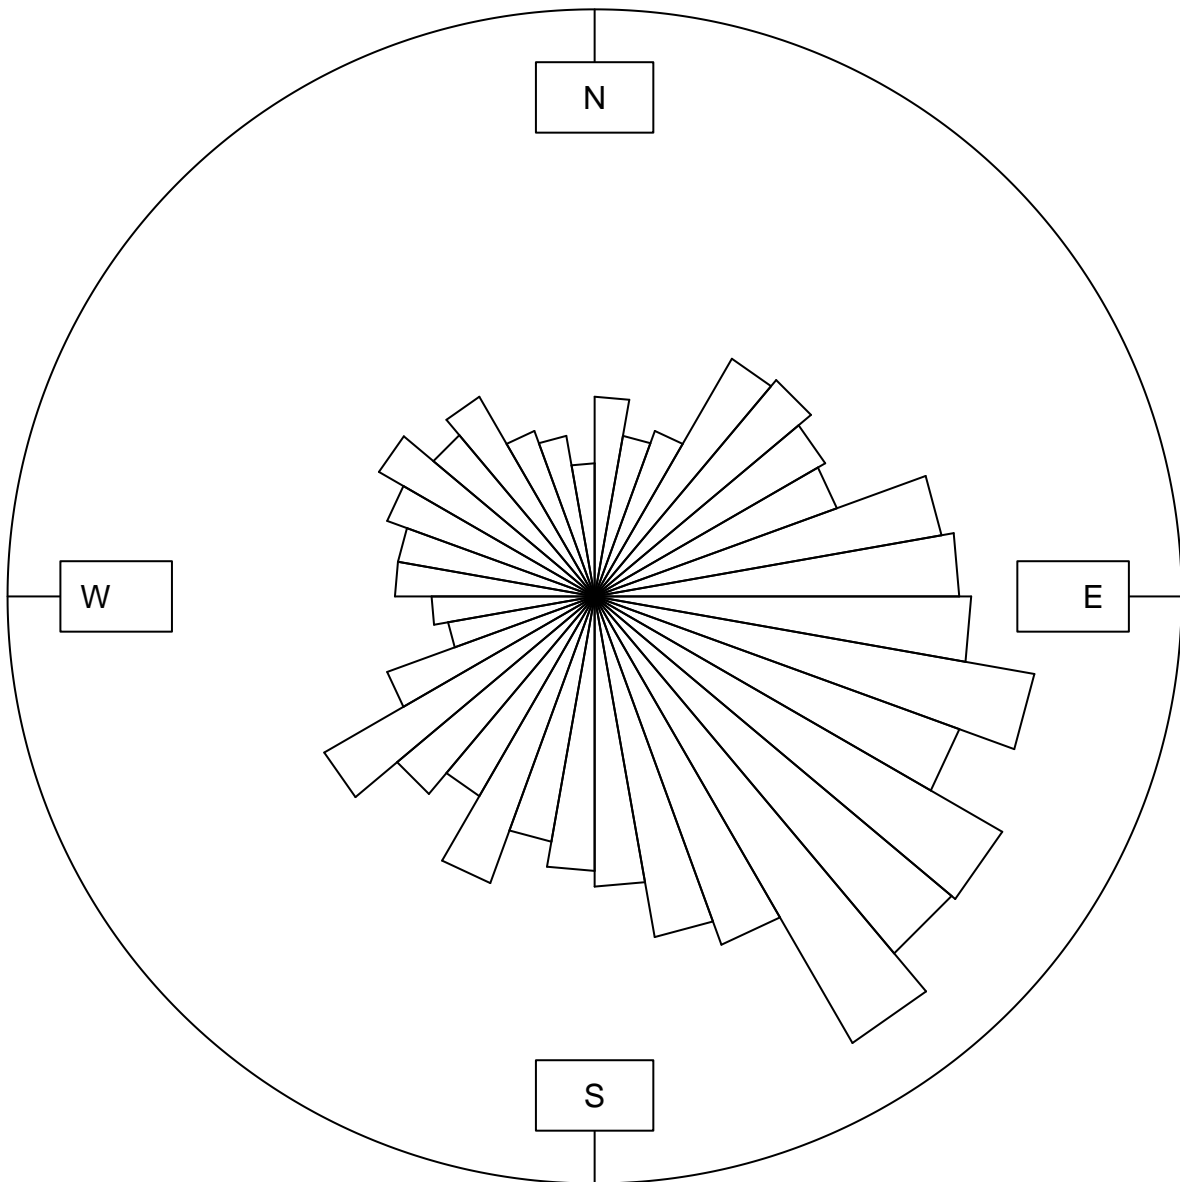

# bootstrap 619

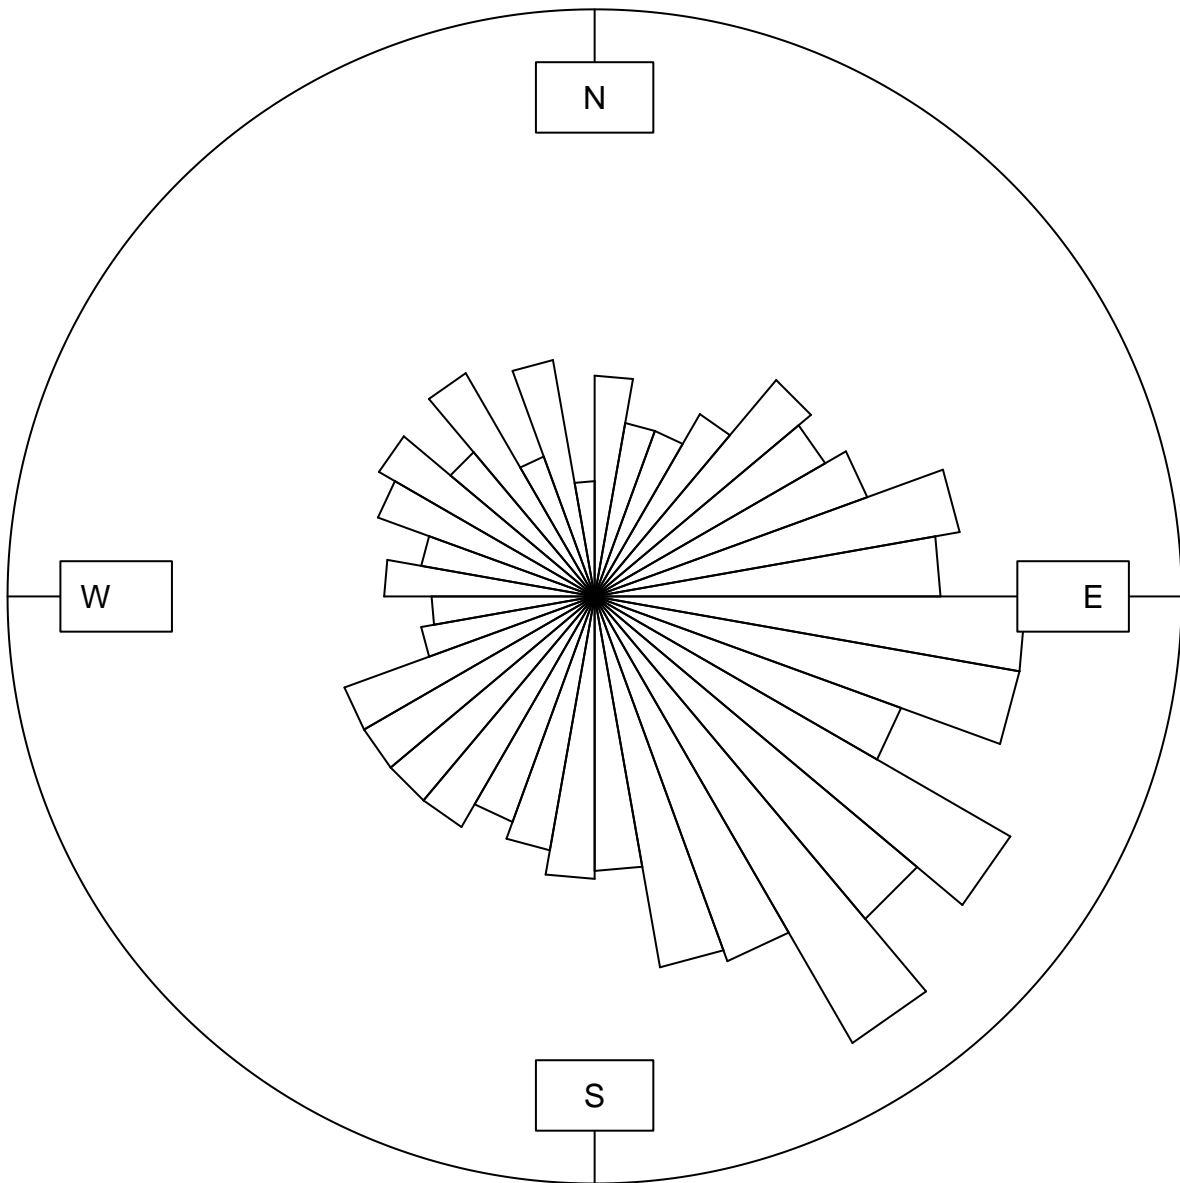

# bootstrap 620

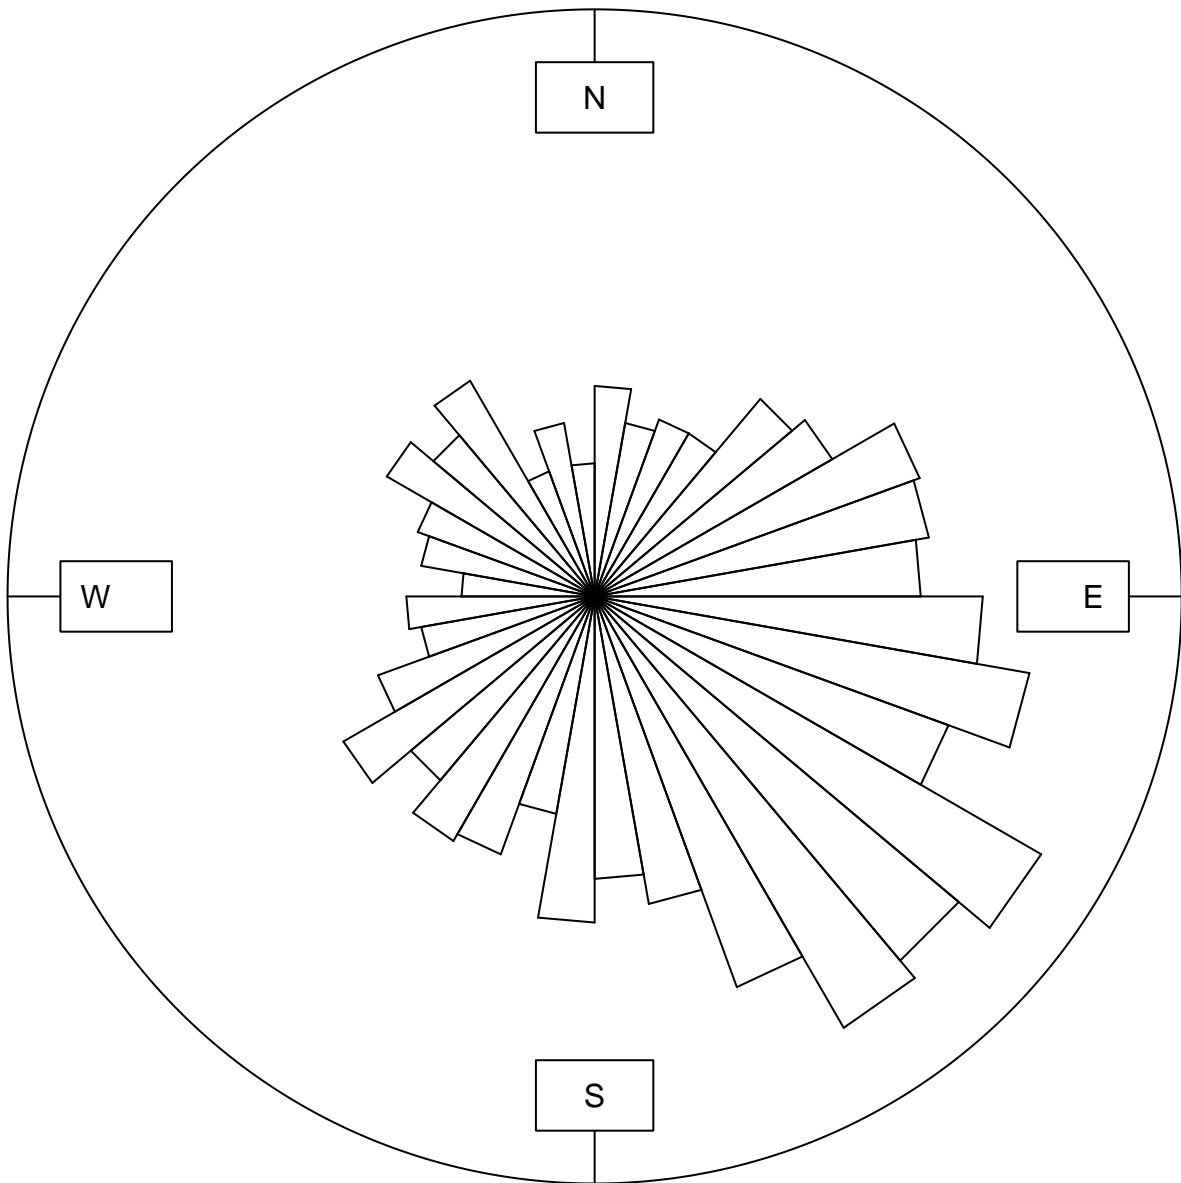

# bootstrap 621

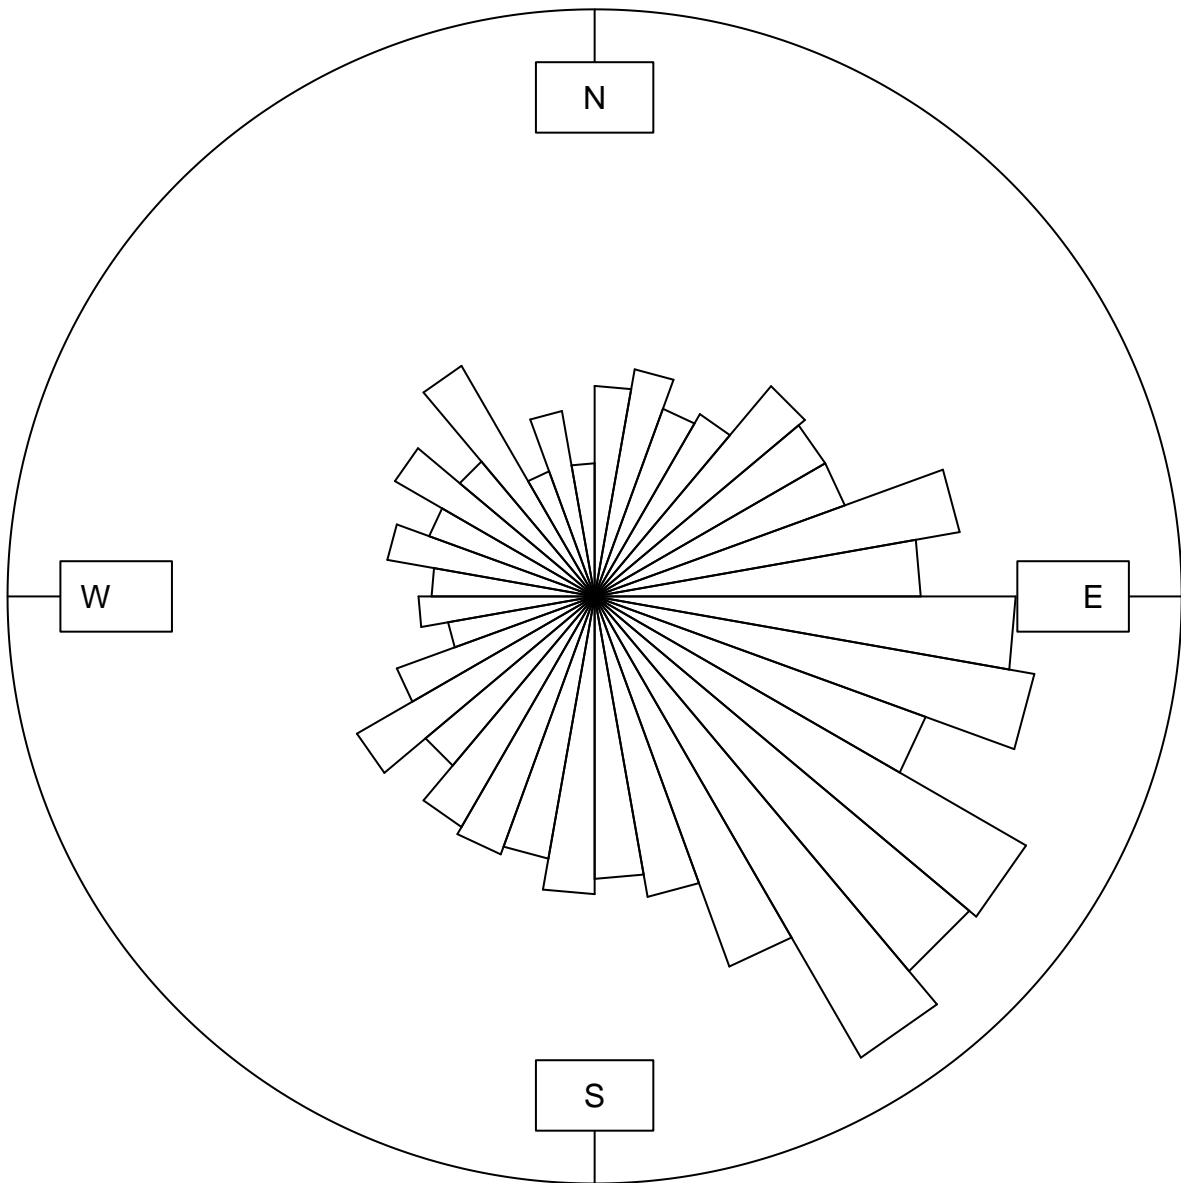

# bootstrap 622

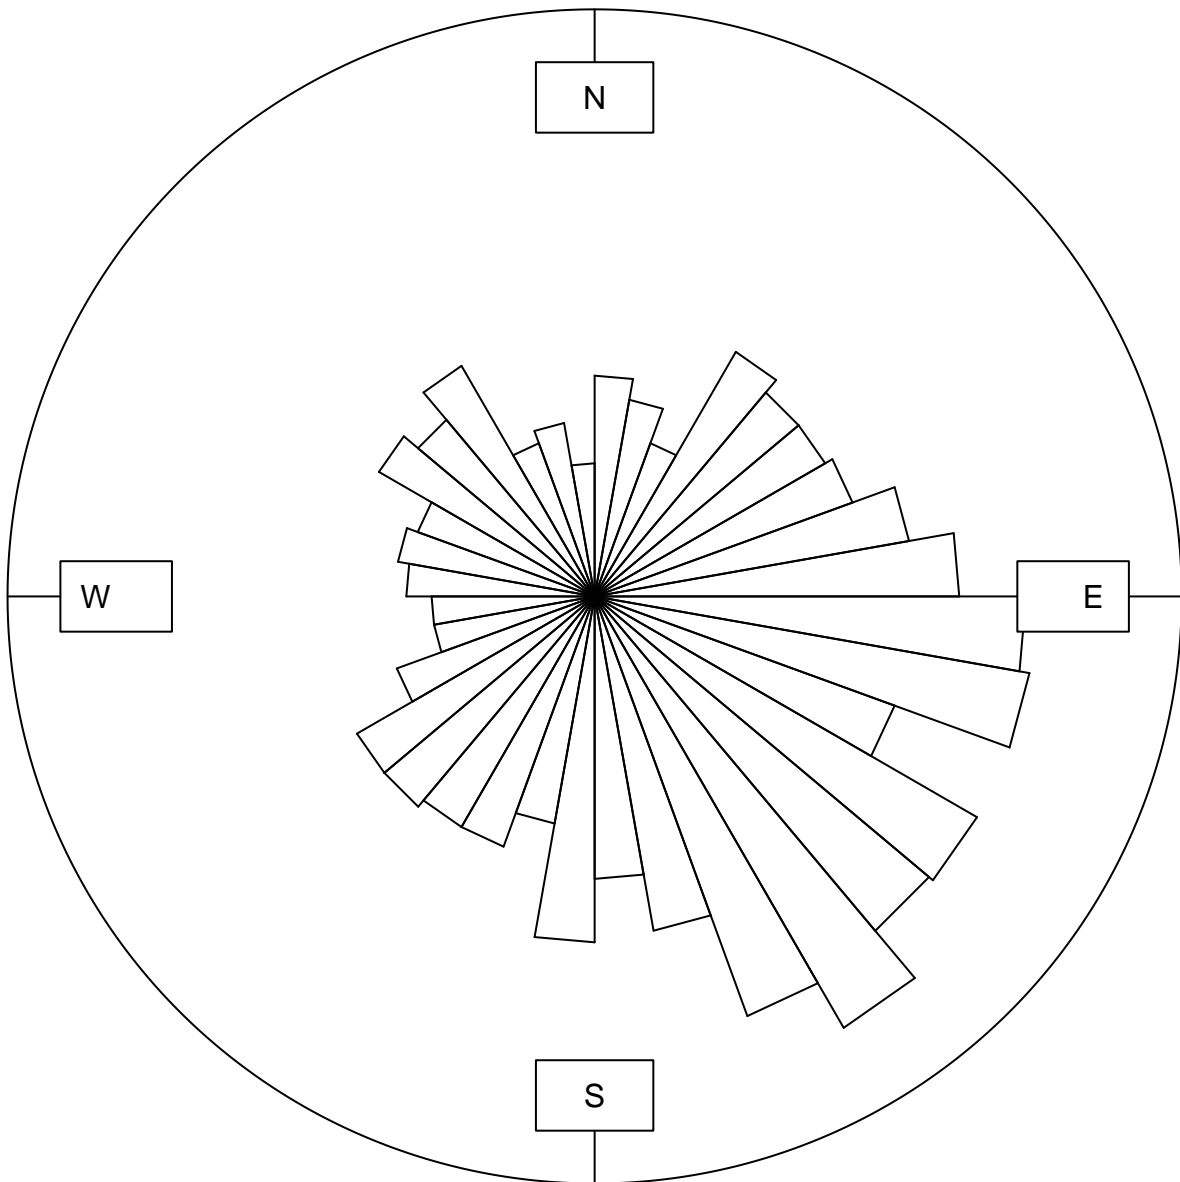

# bootstrap 623

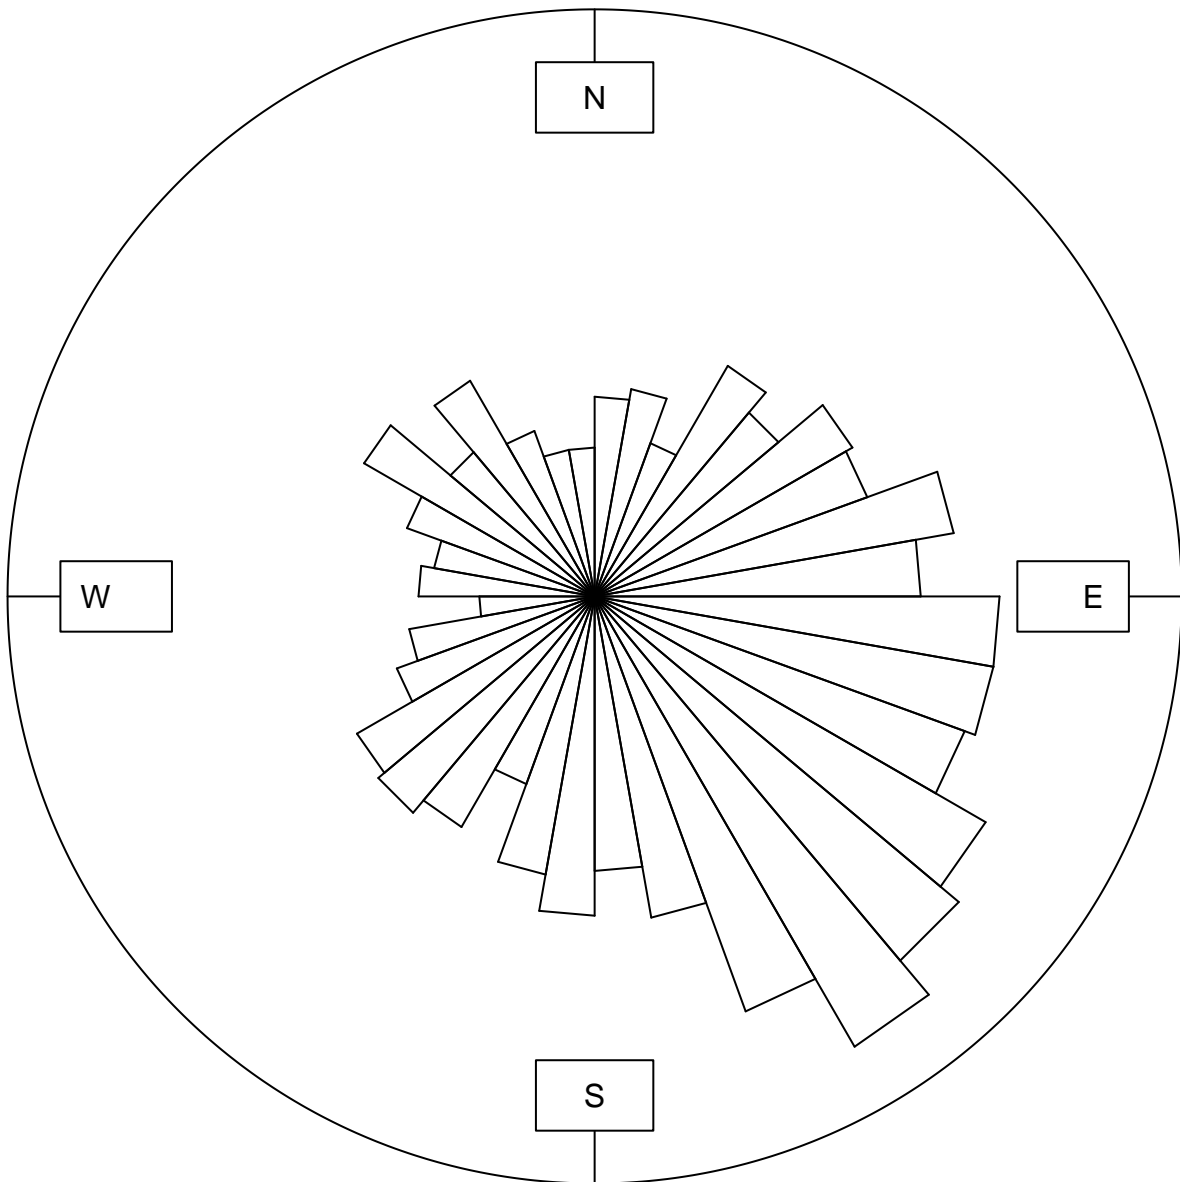

# bootstrap 624

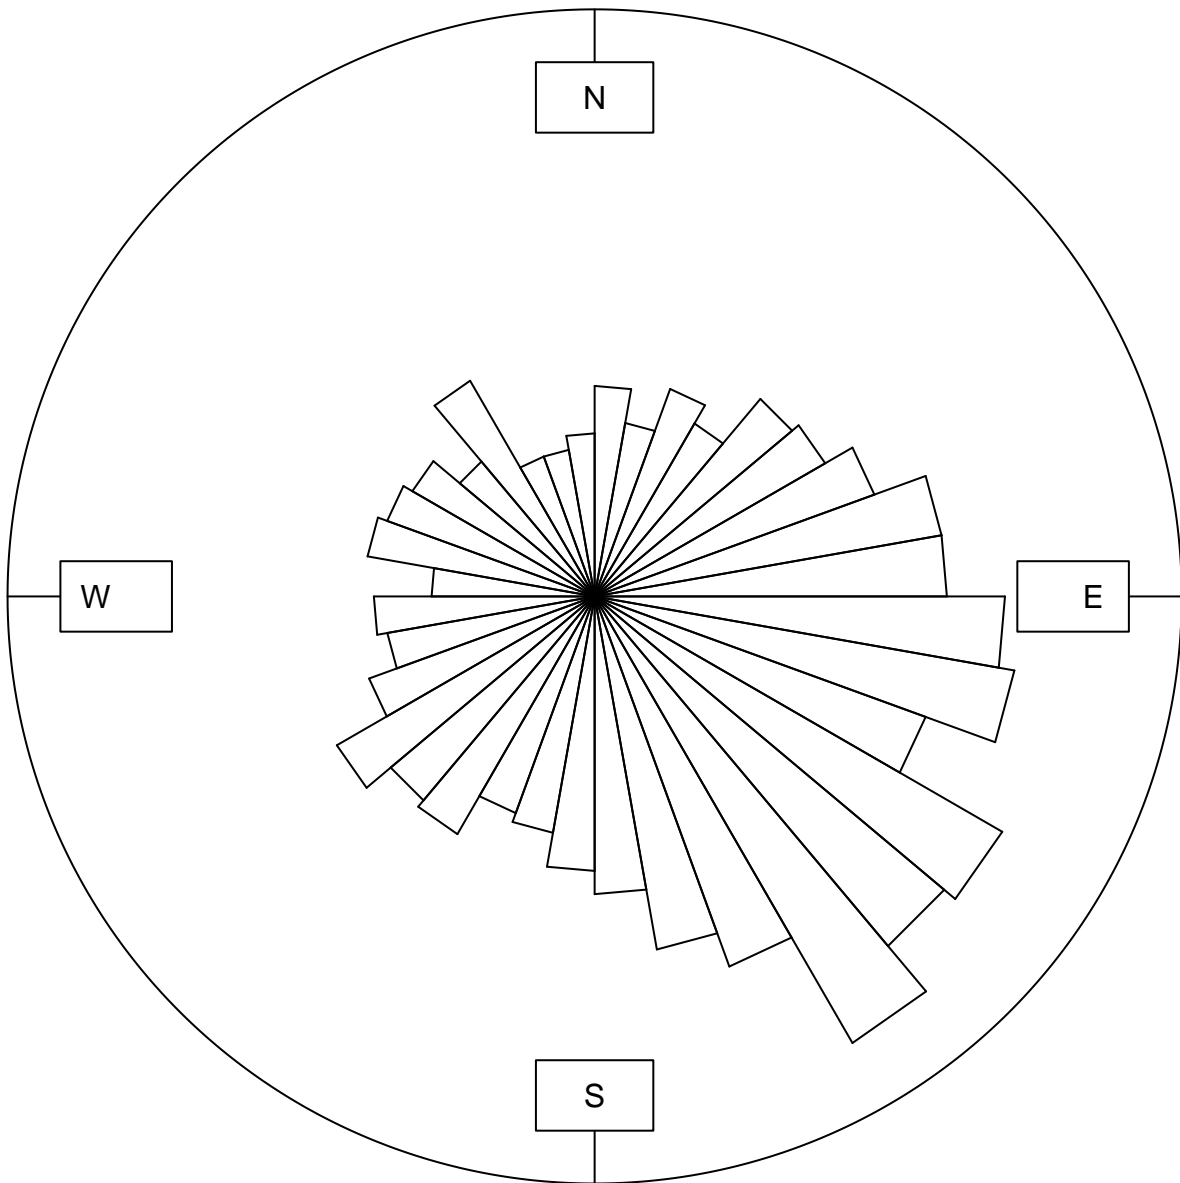



# bootstrap 625

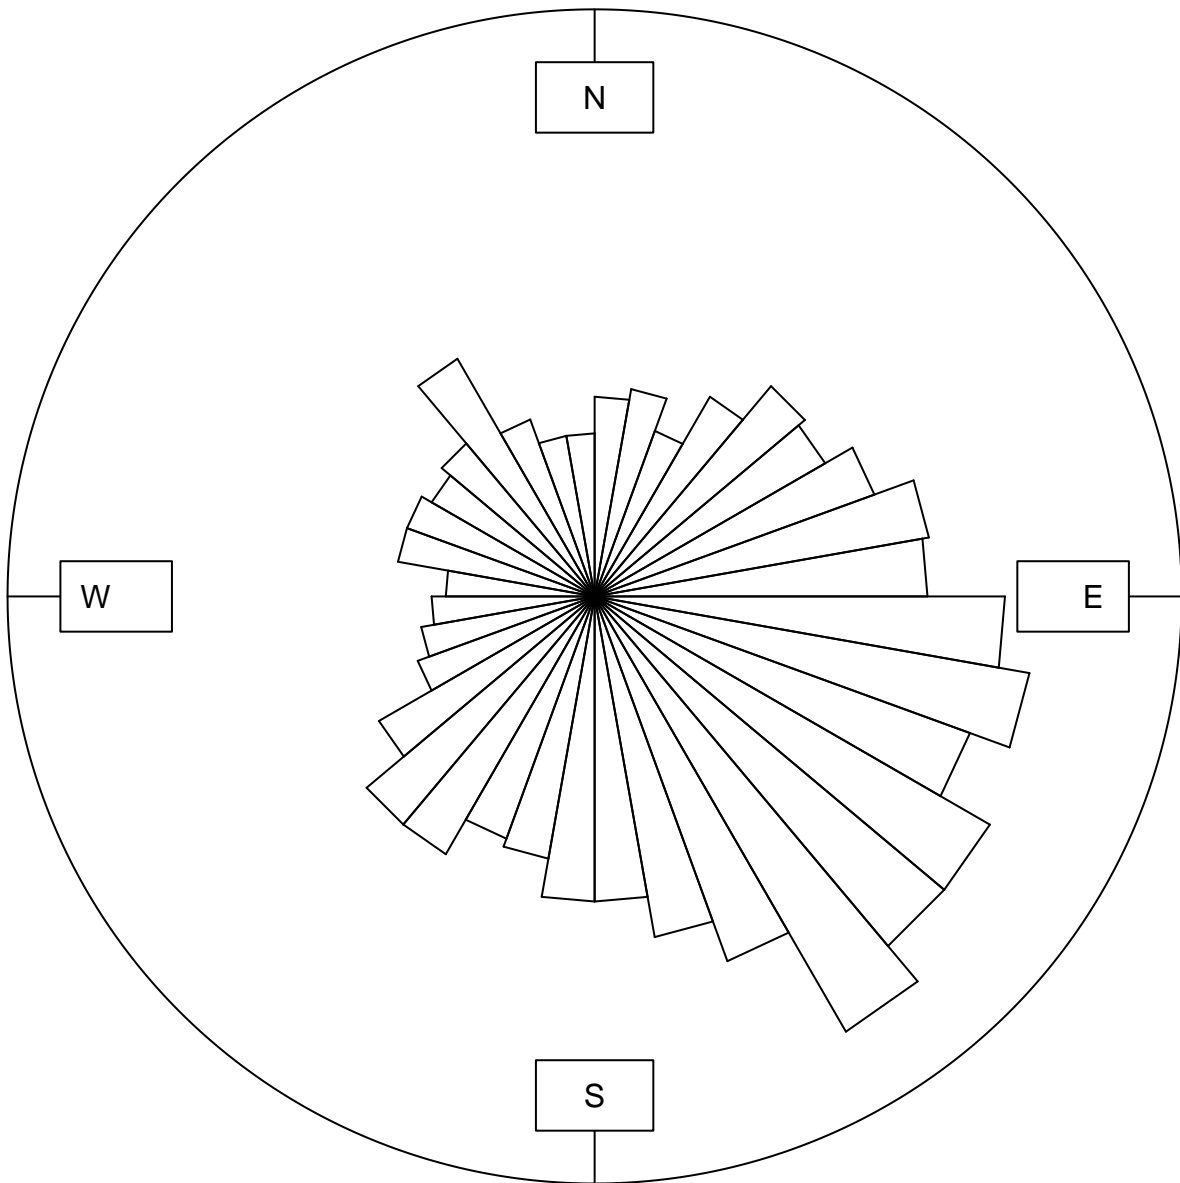

# bootstrap 626

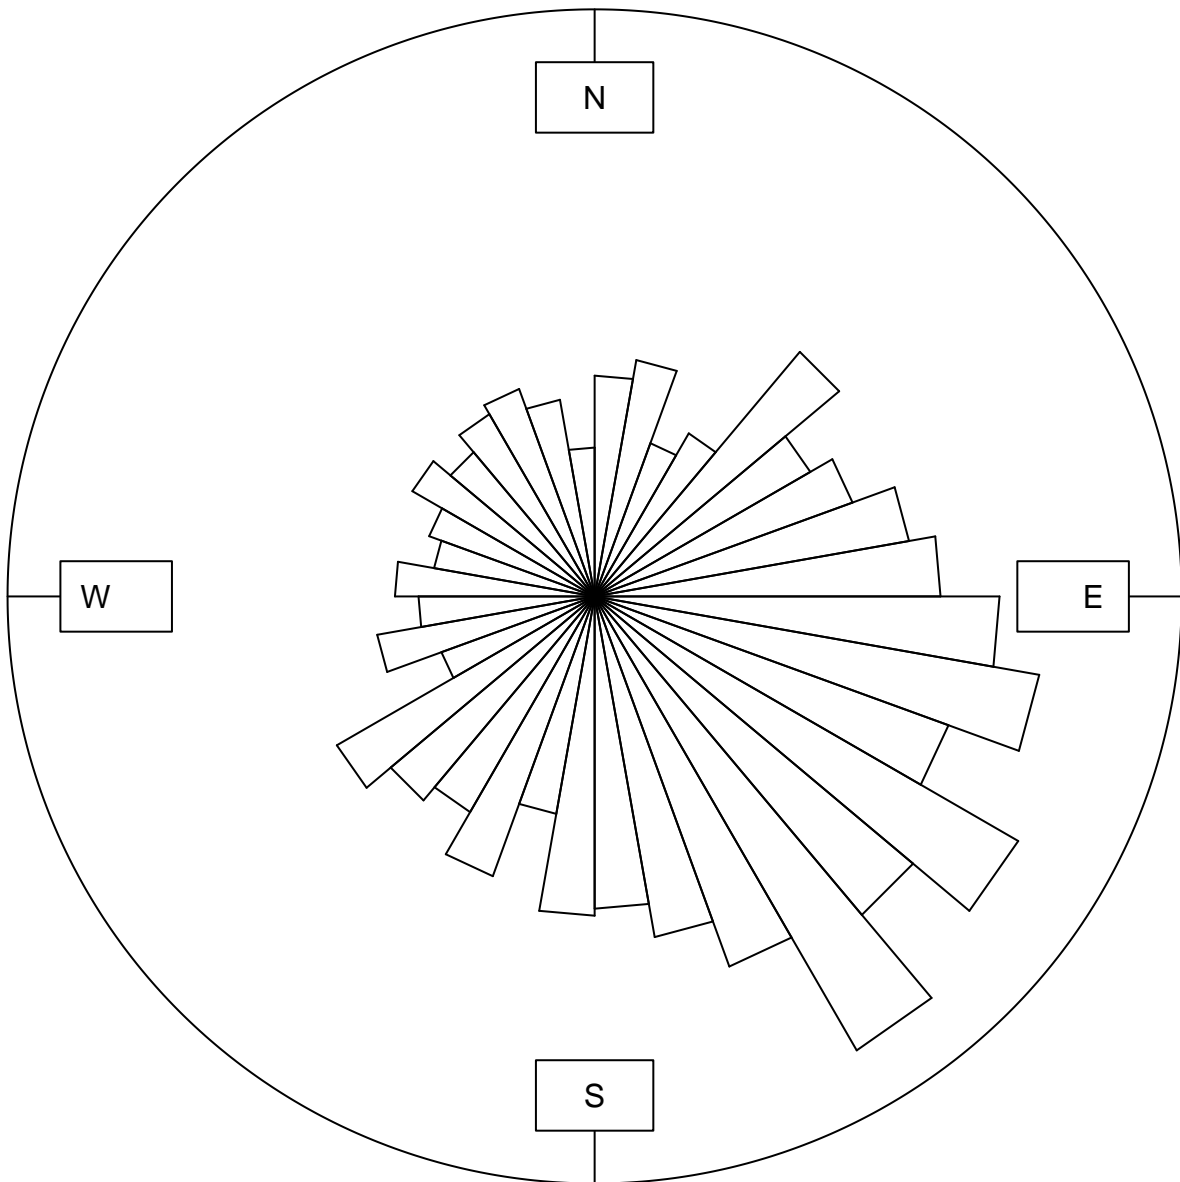

# bootstrap 627

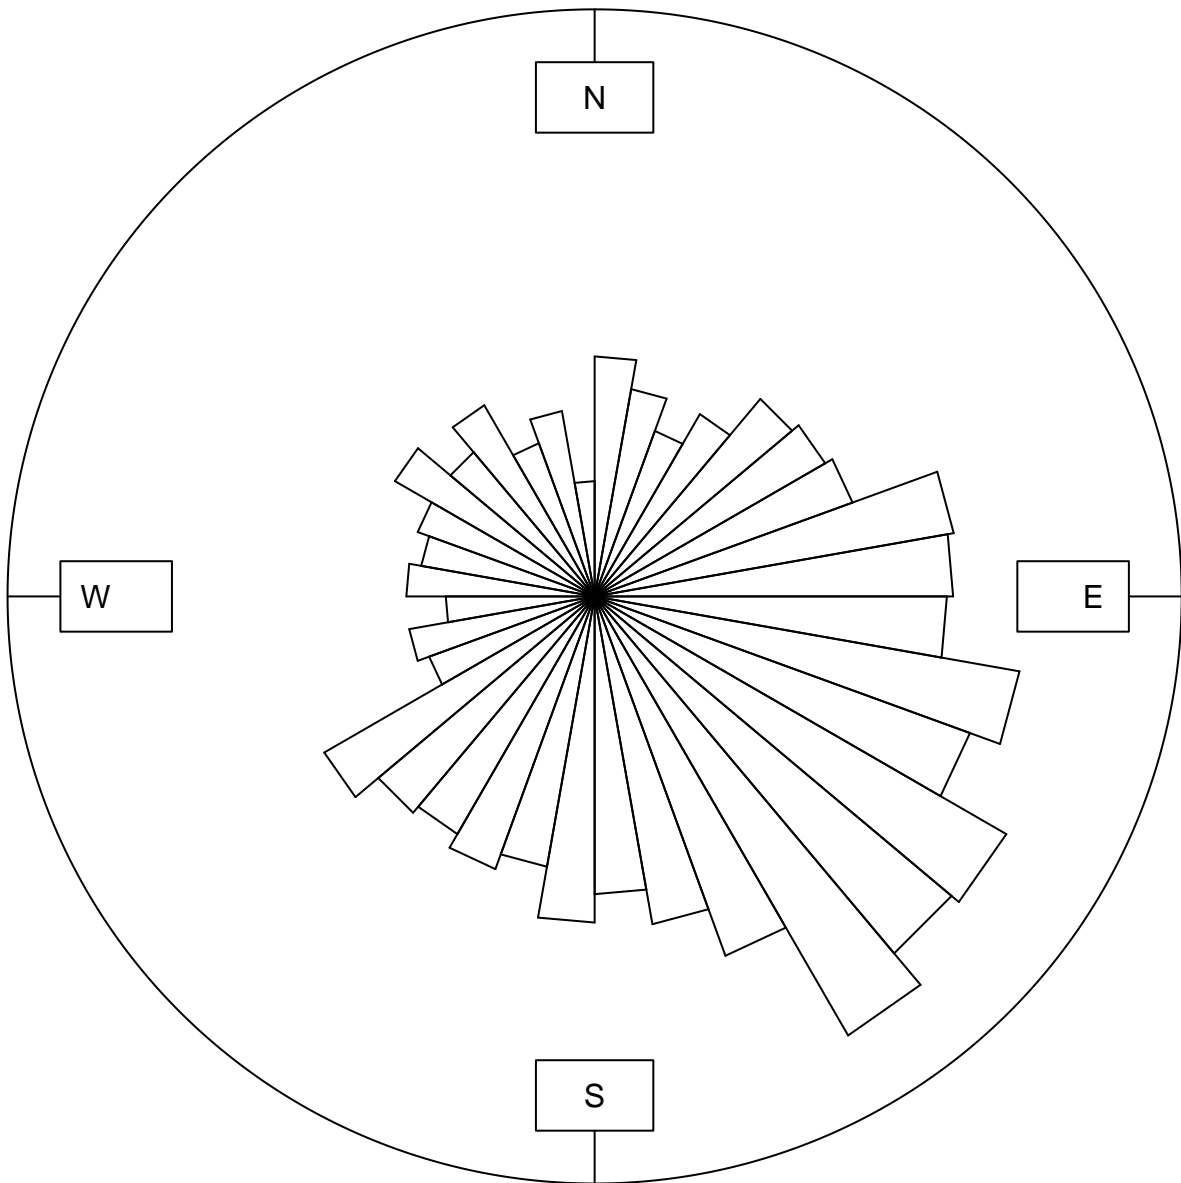

# bootstrap 628

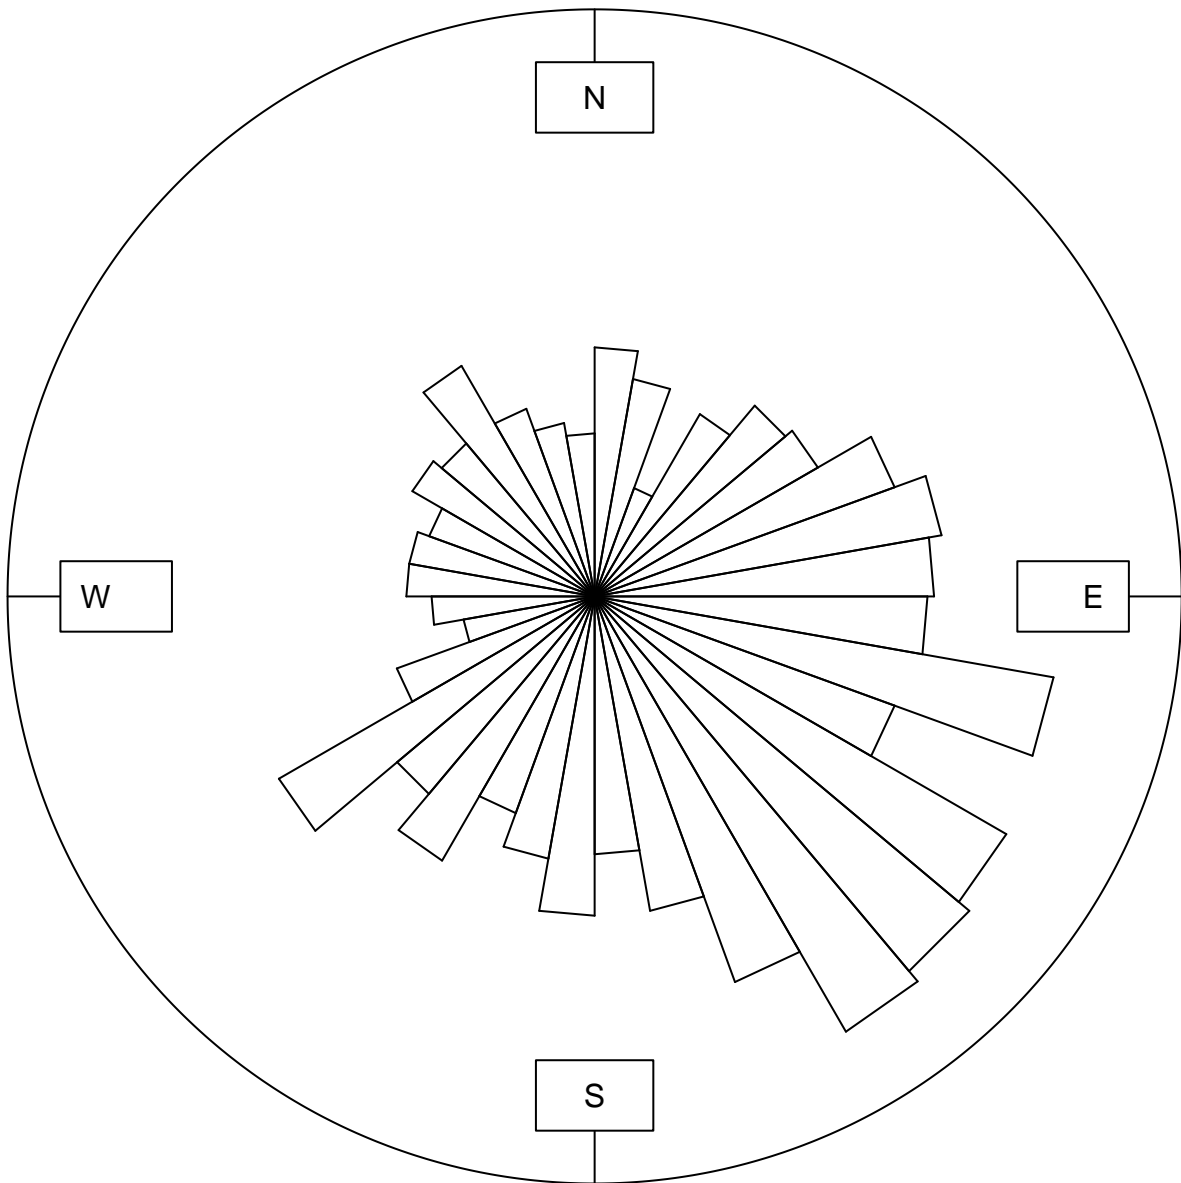

# bootstrap 629

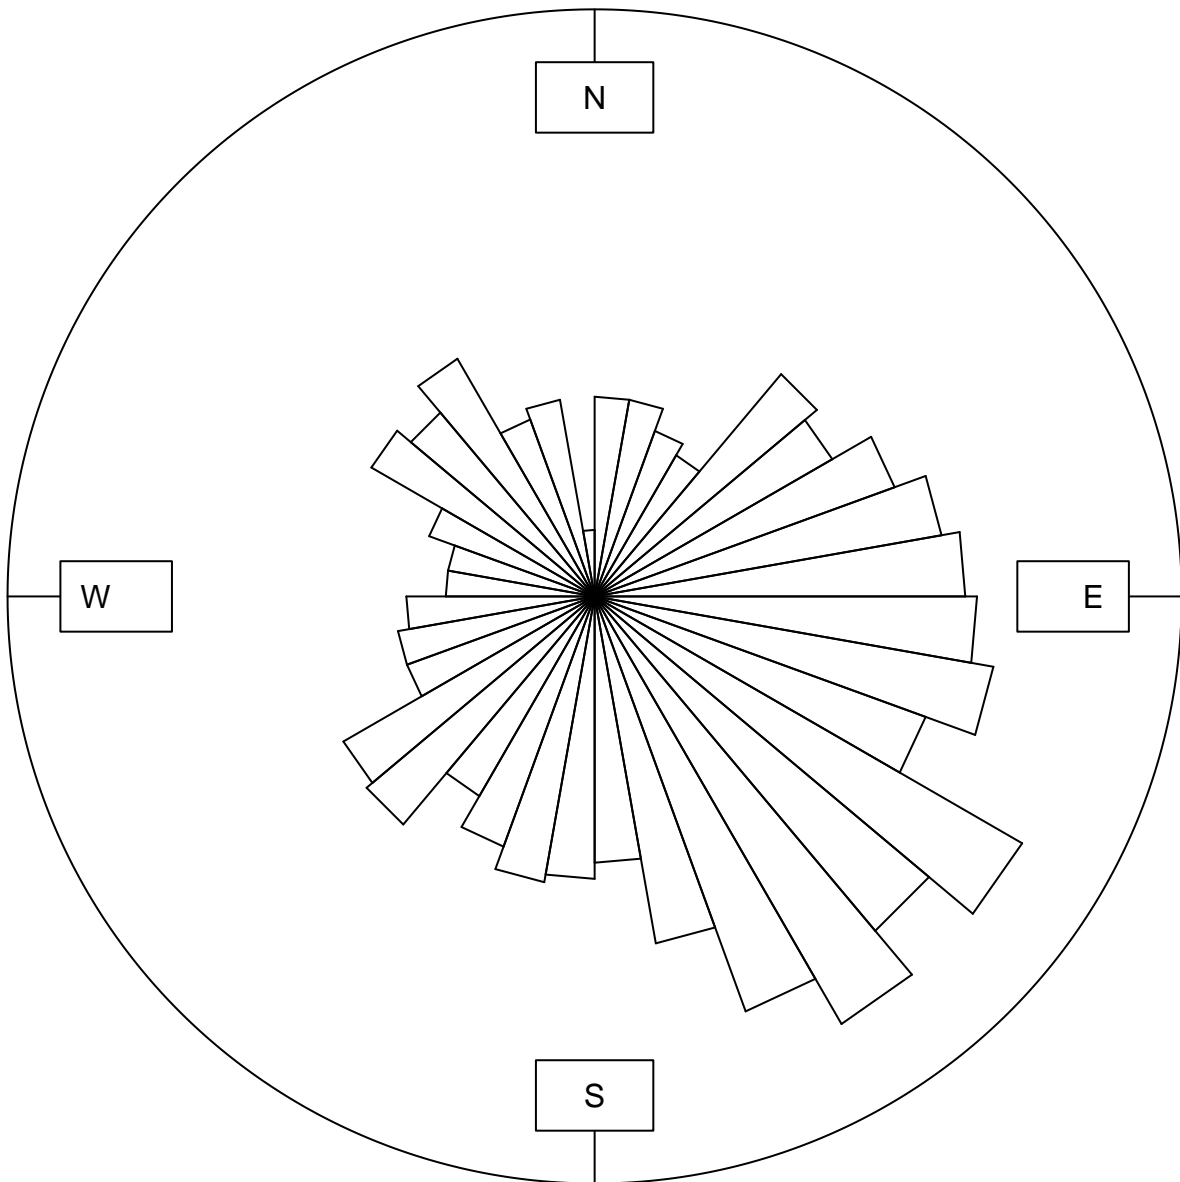

# bootstrap 630

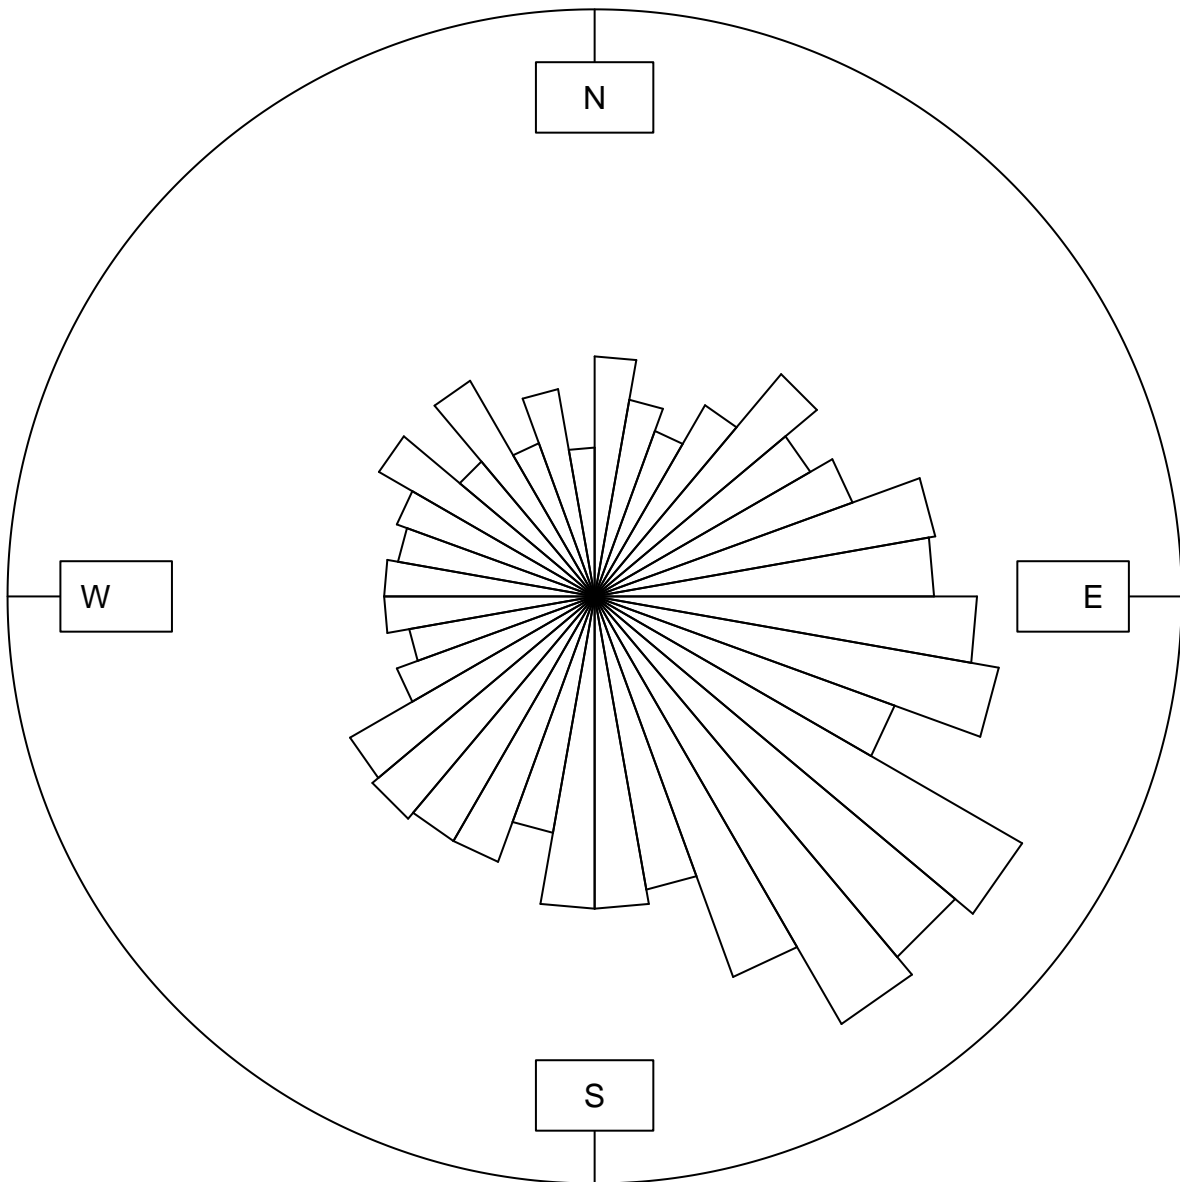

# bootstrap 631

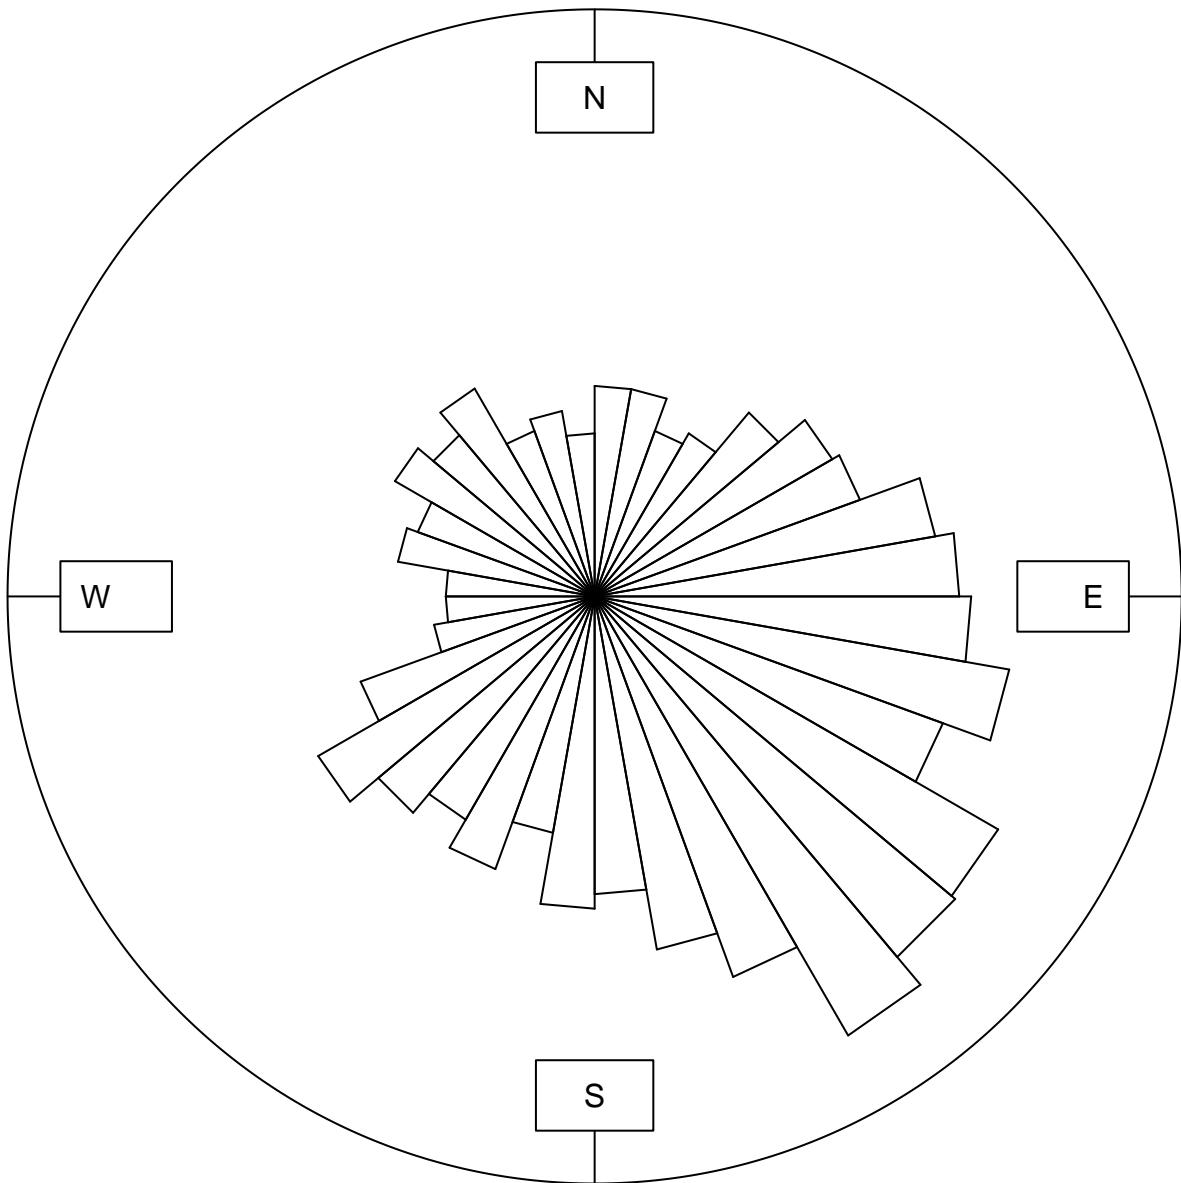

# bootstrap 632

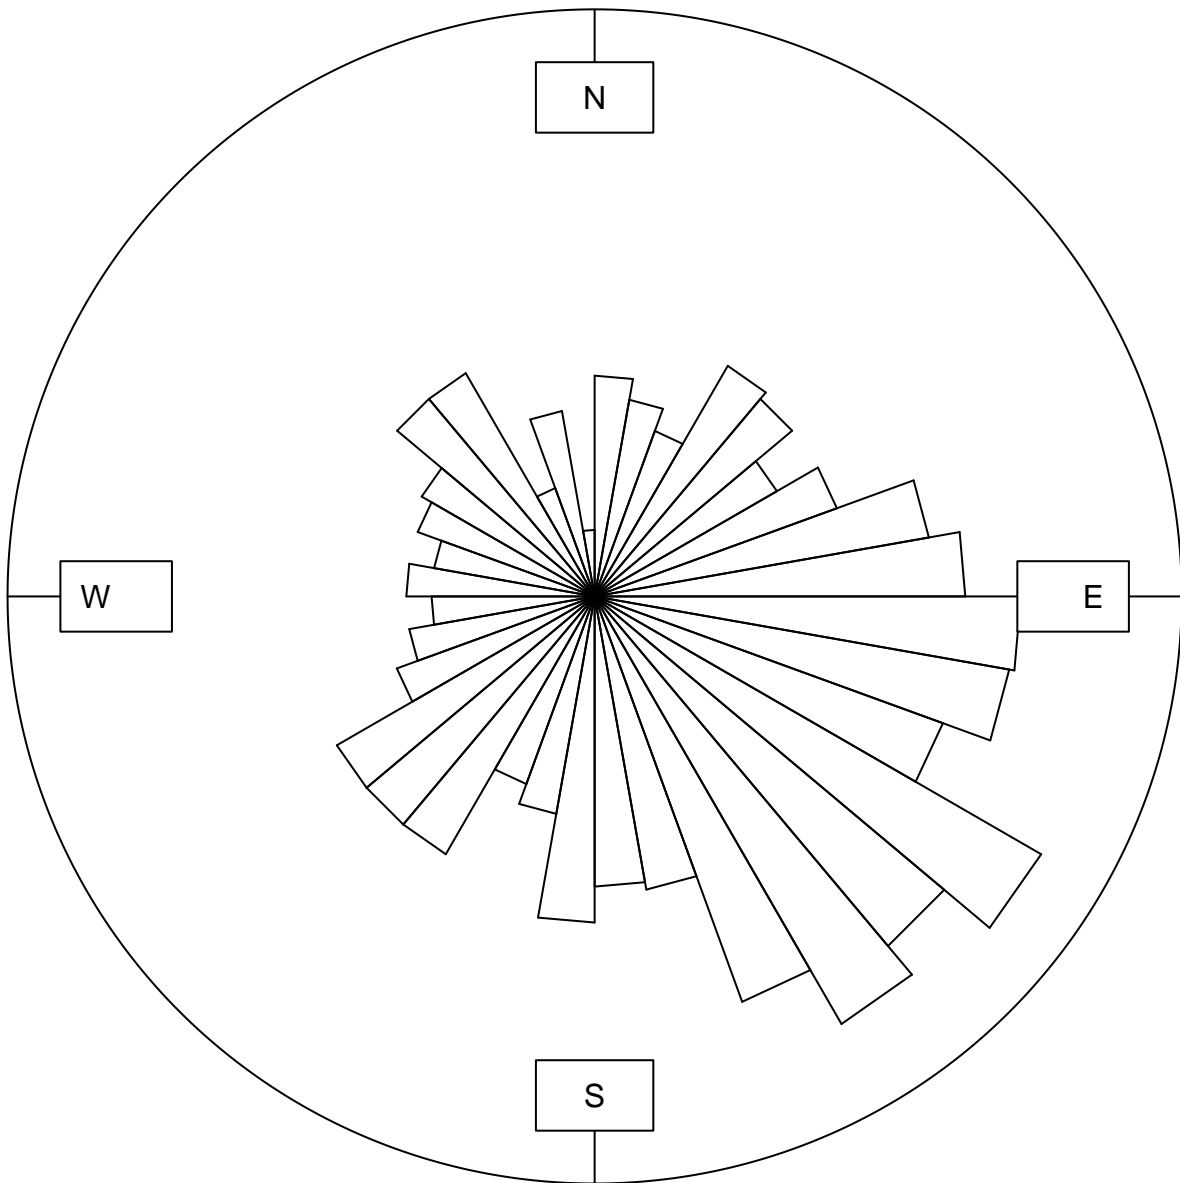



# bootstrap 633

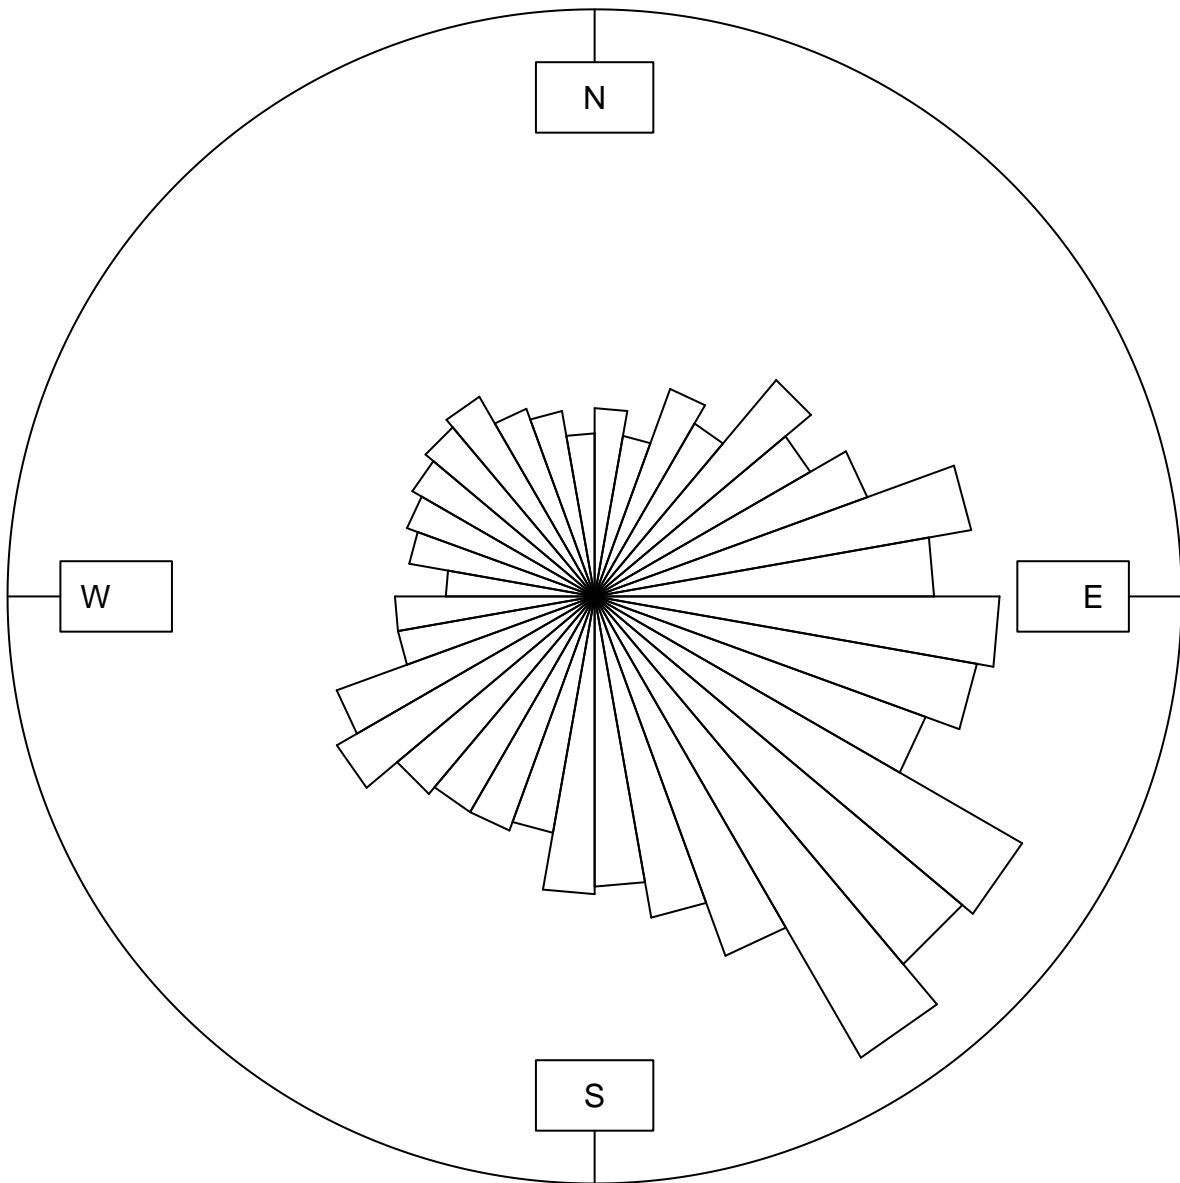

# bootstrap 634

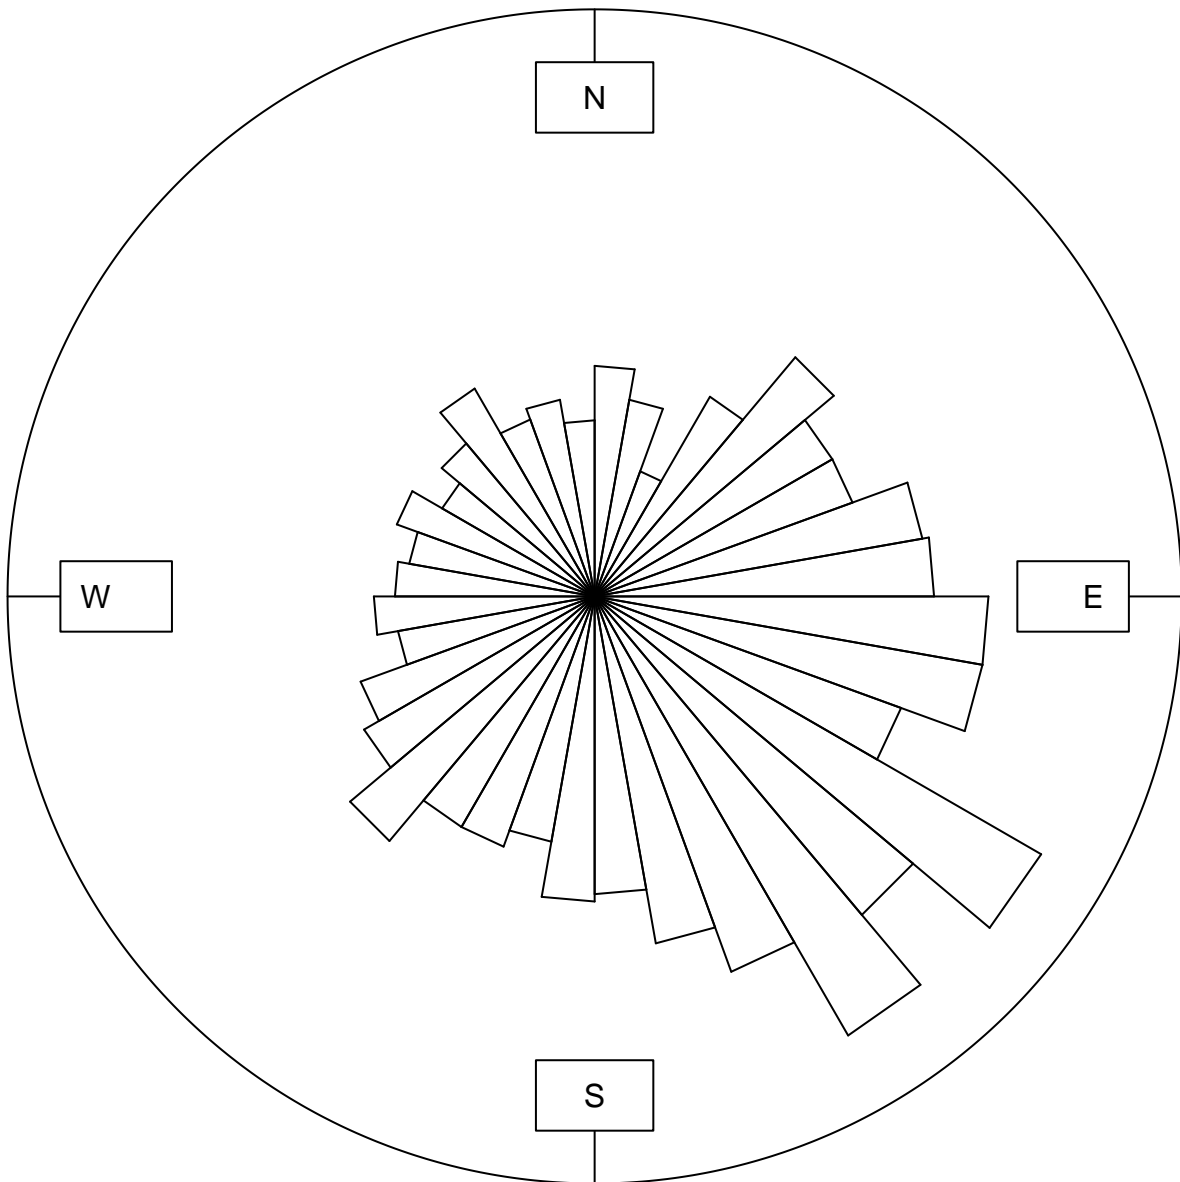

# bootstrap 635

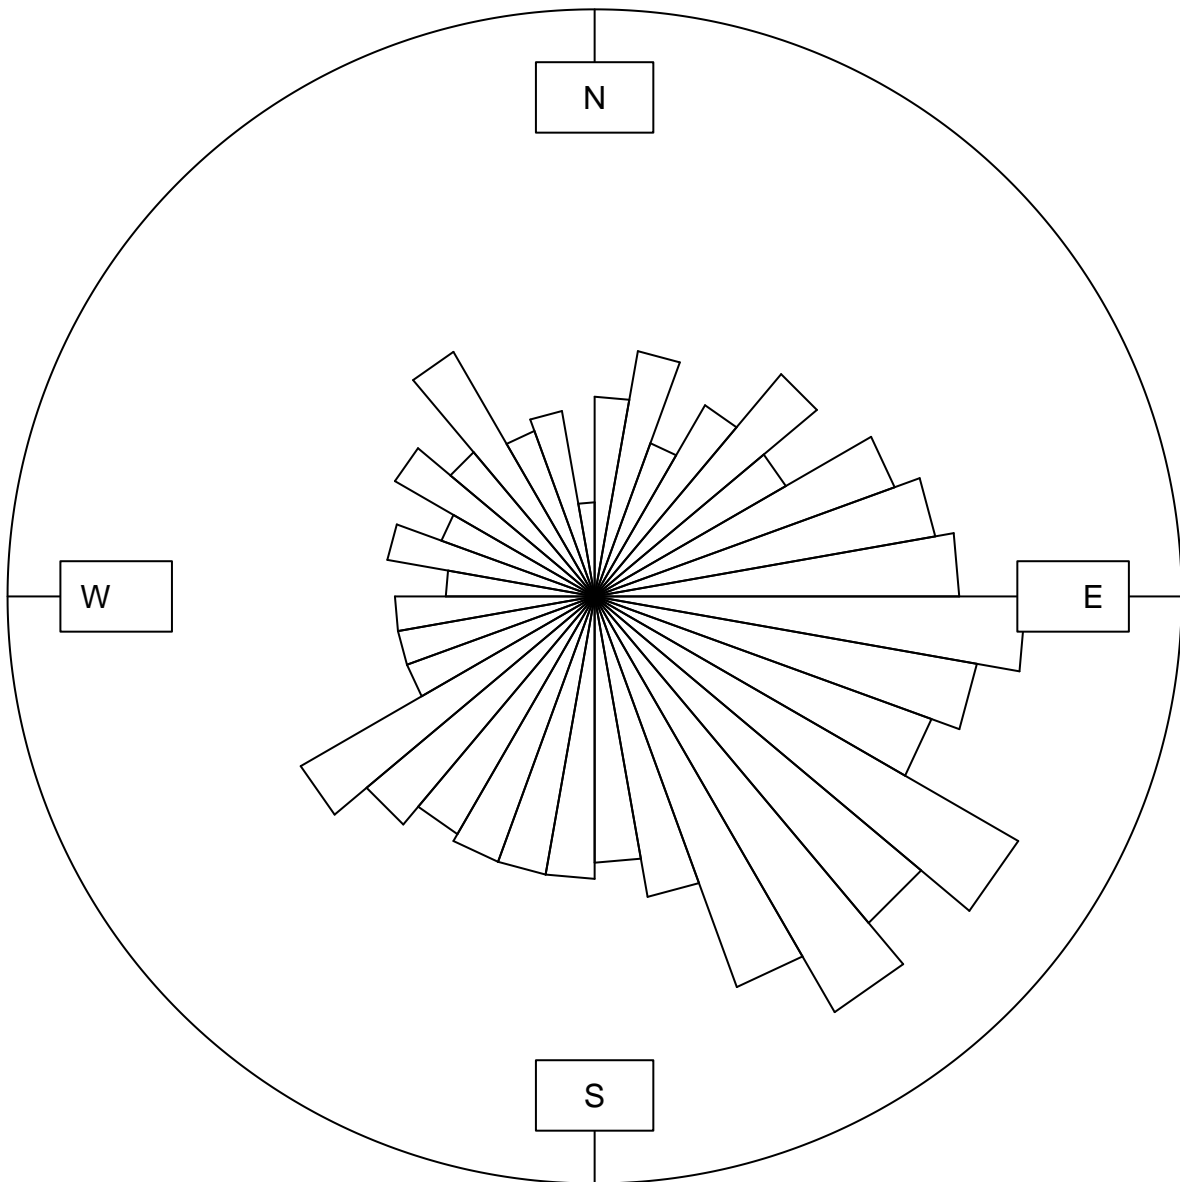

# bootstrap 636

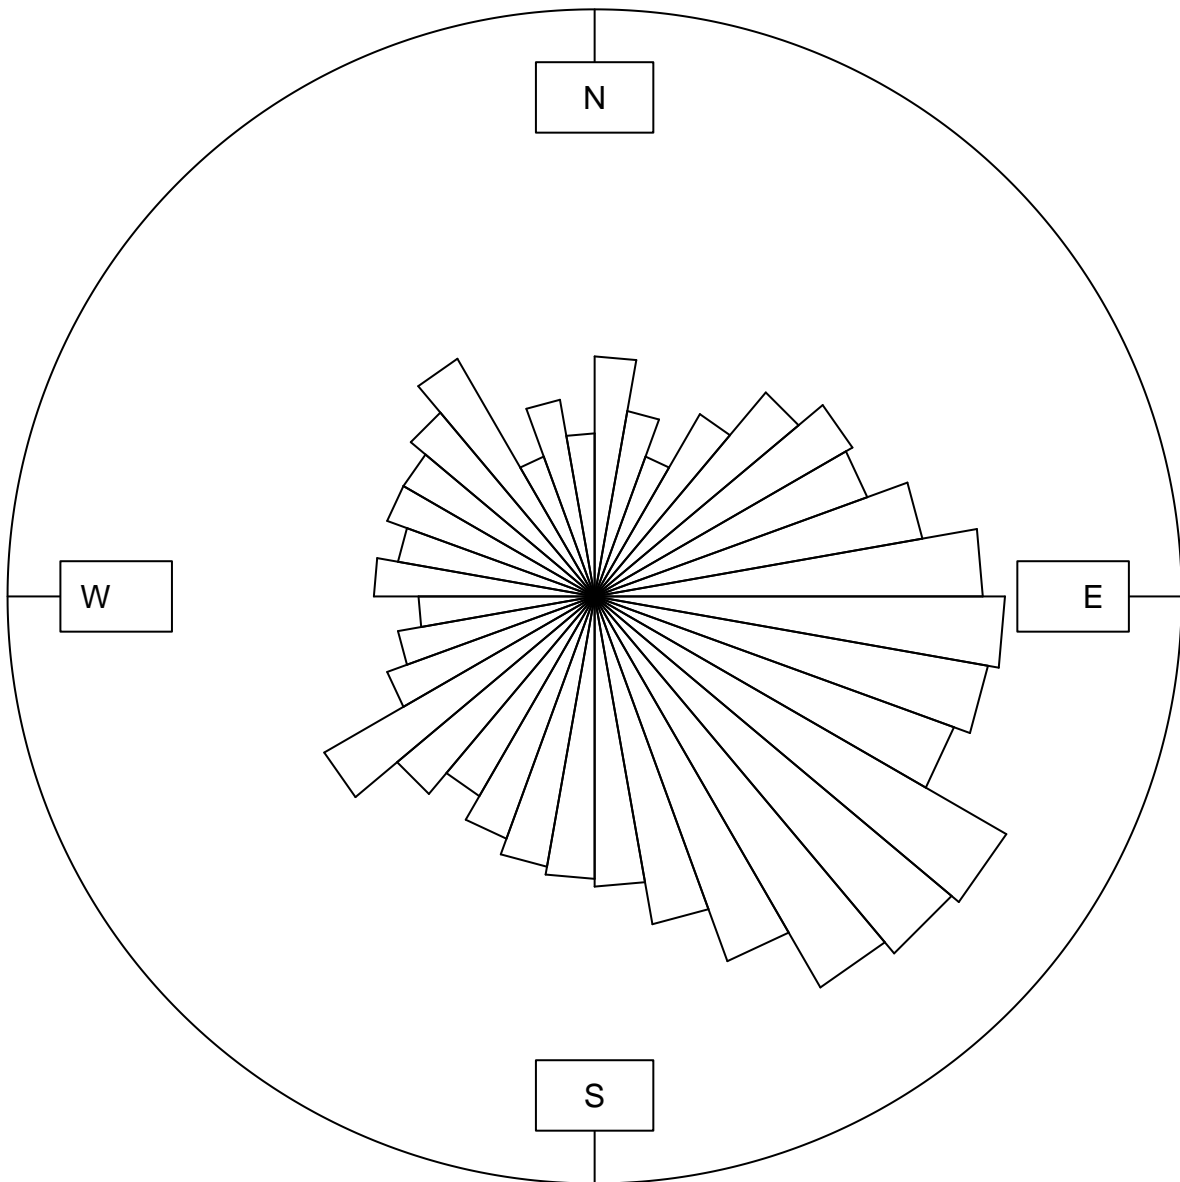

# bootstrap 637

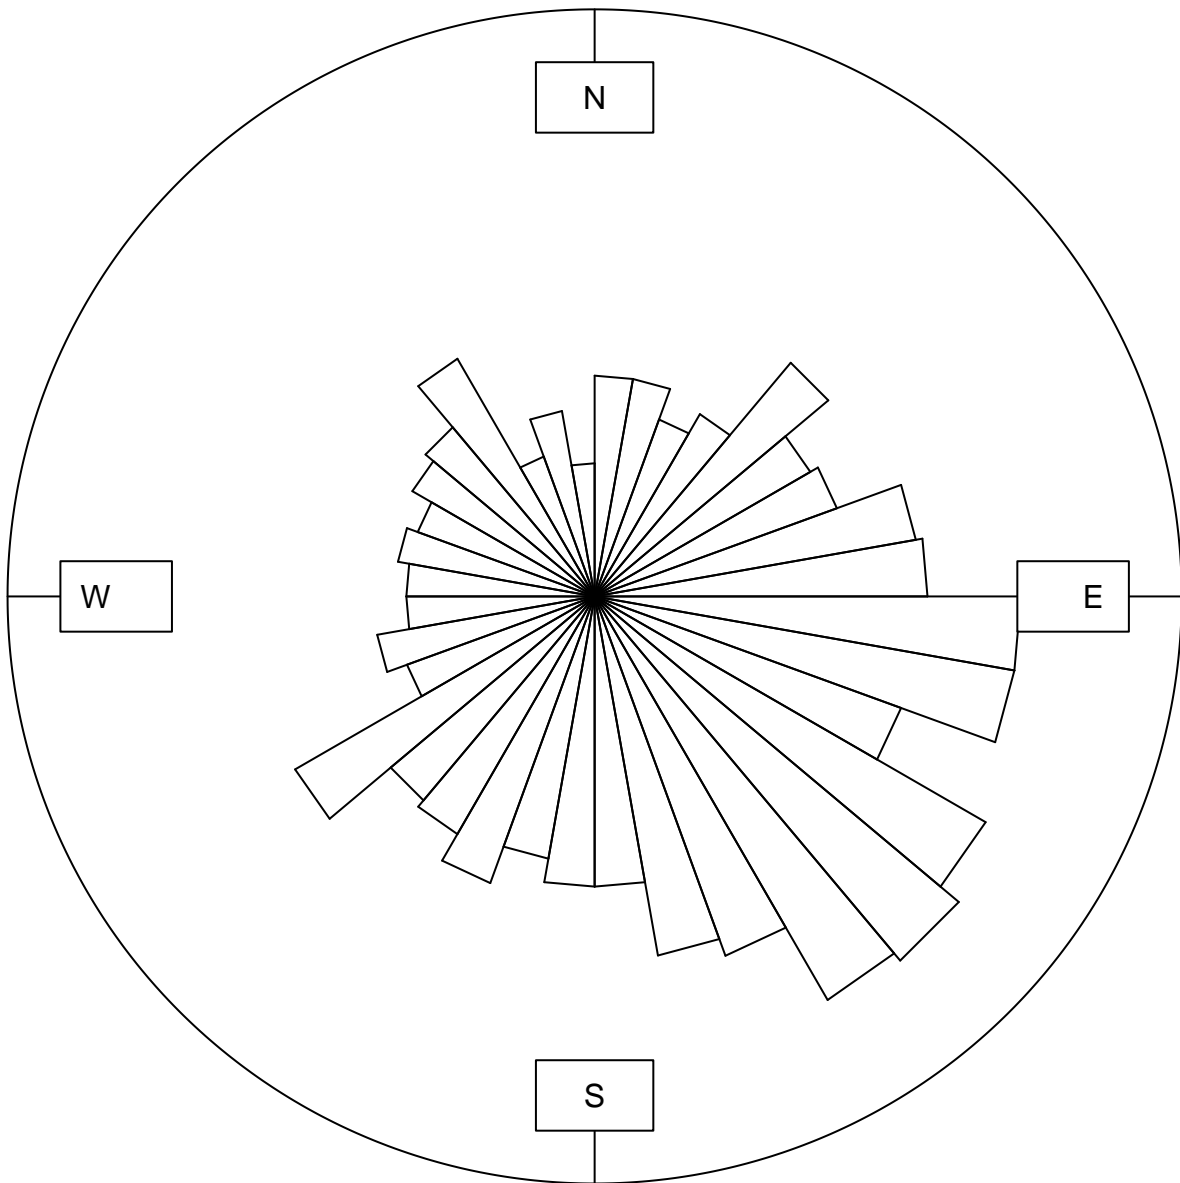

# bootstrap 638

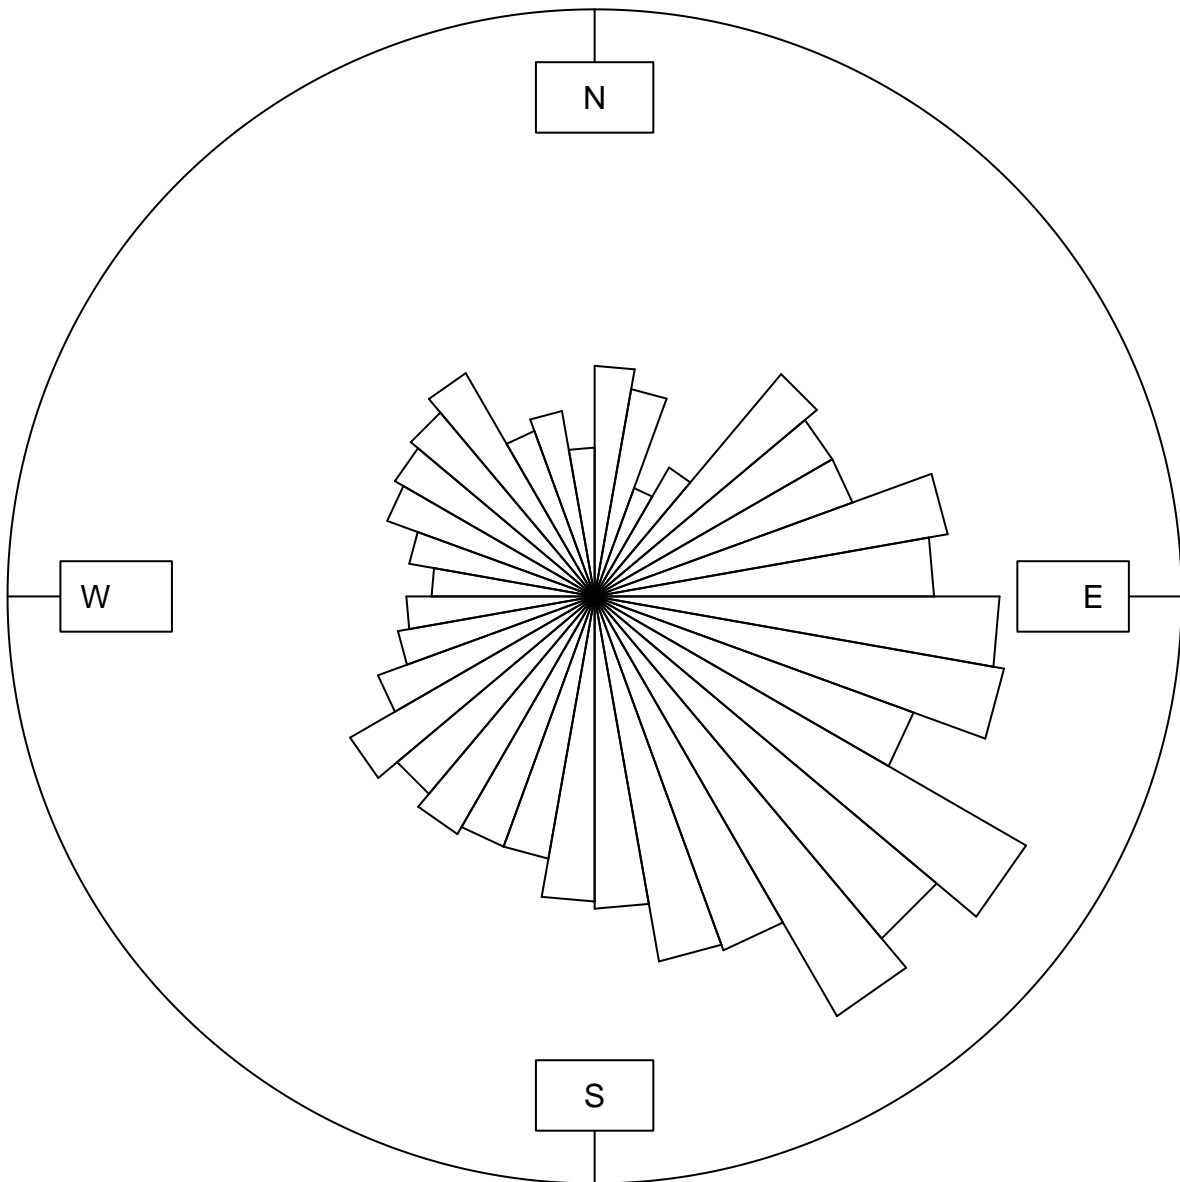

# bootstrap 639

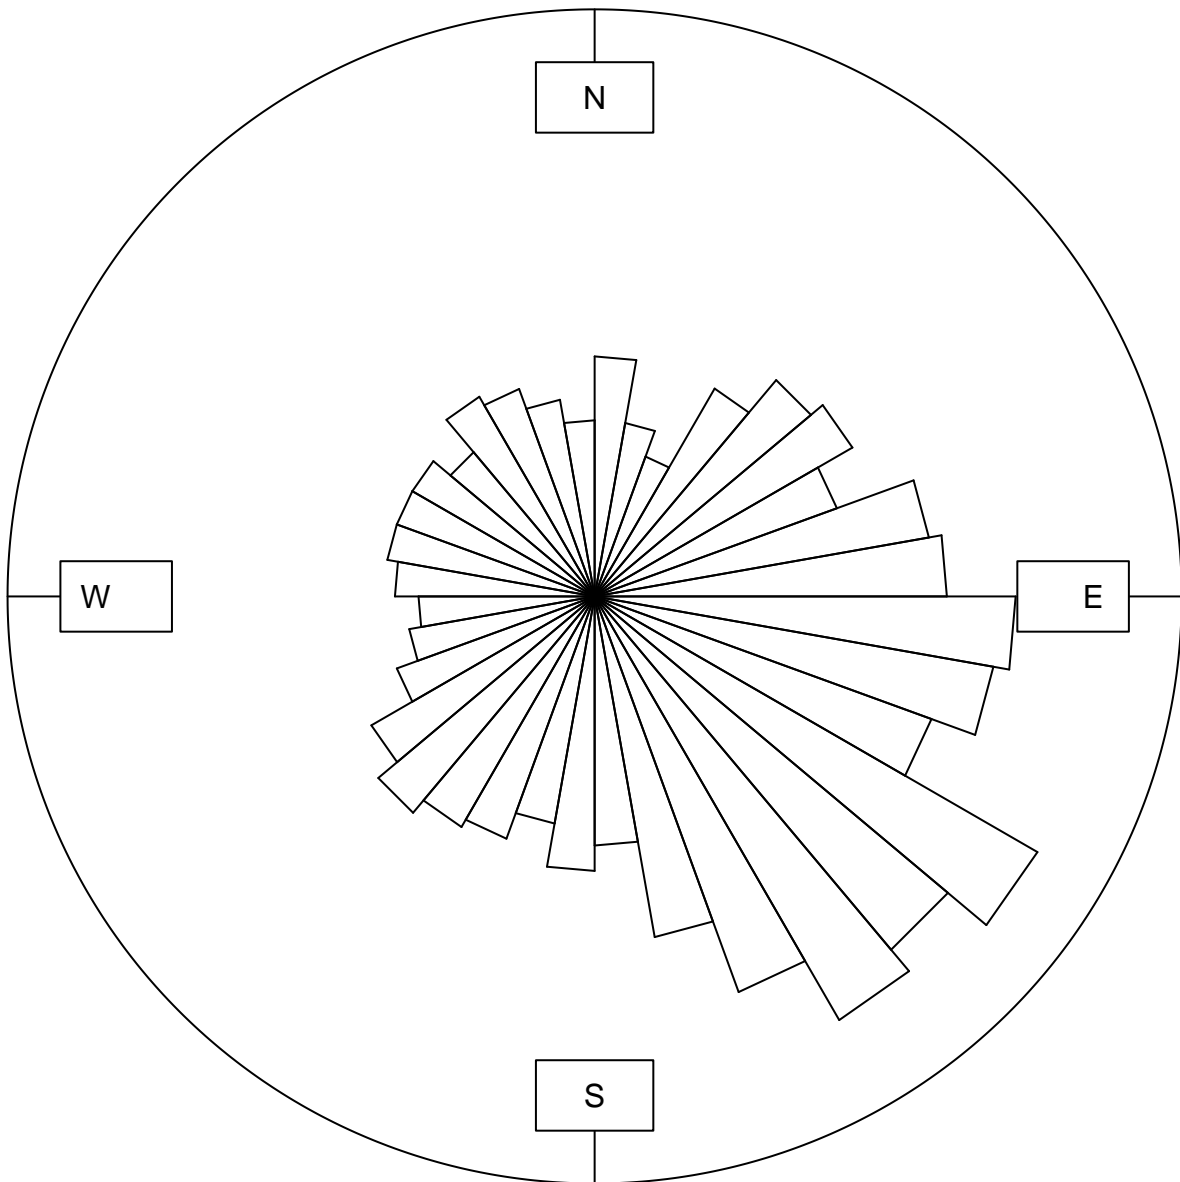

# bootstrap 640

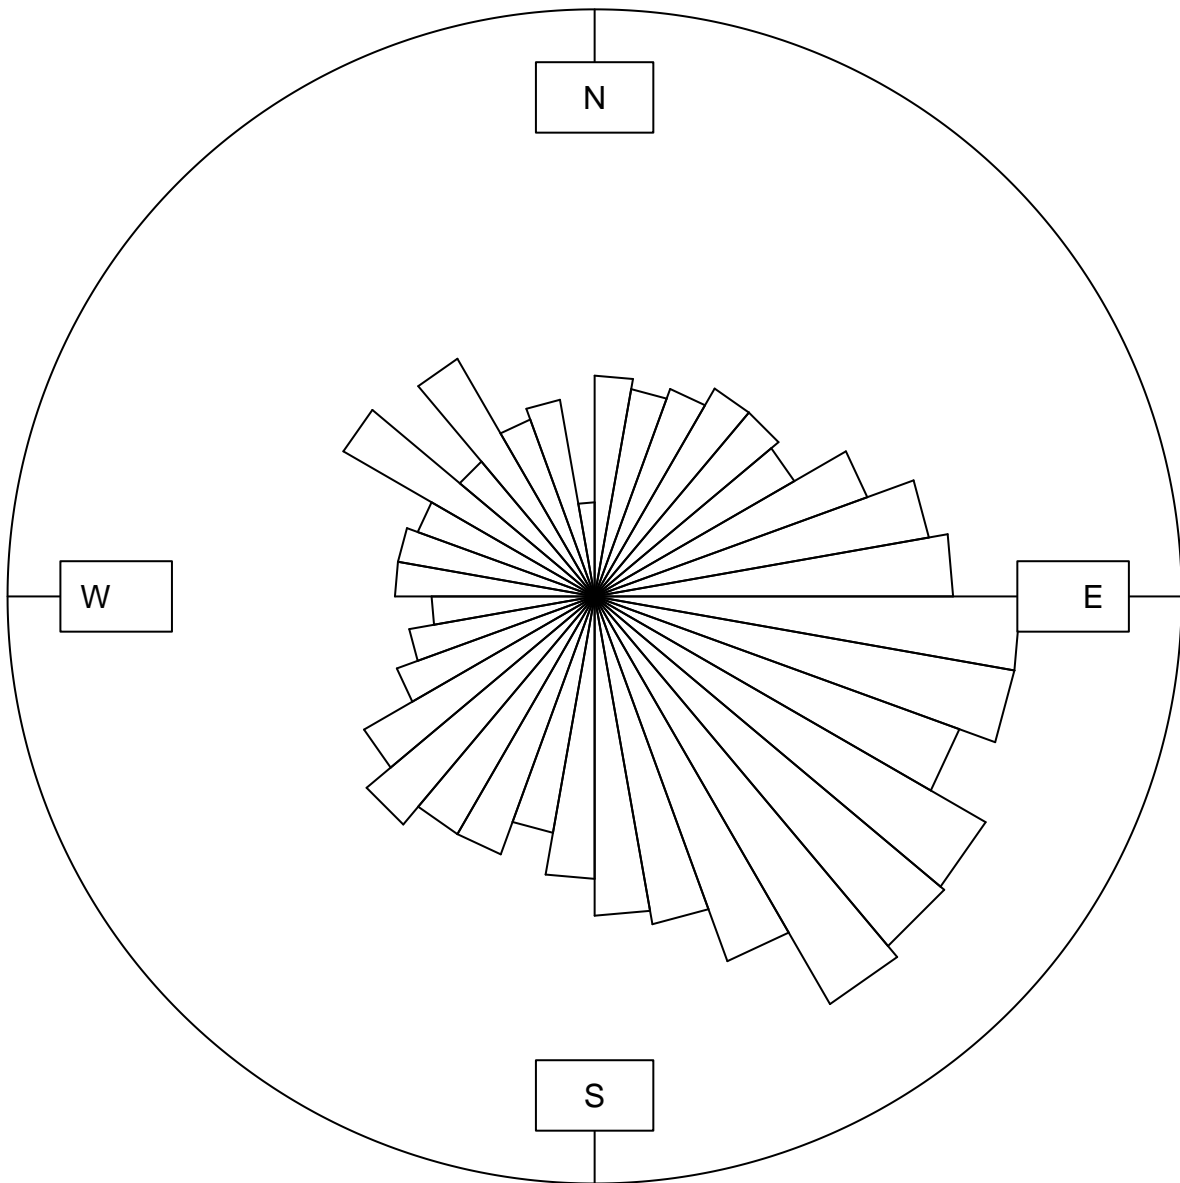



# bootstrap 641

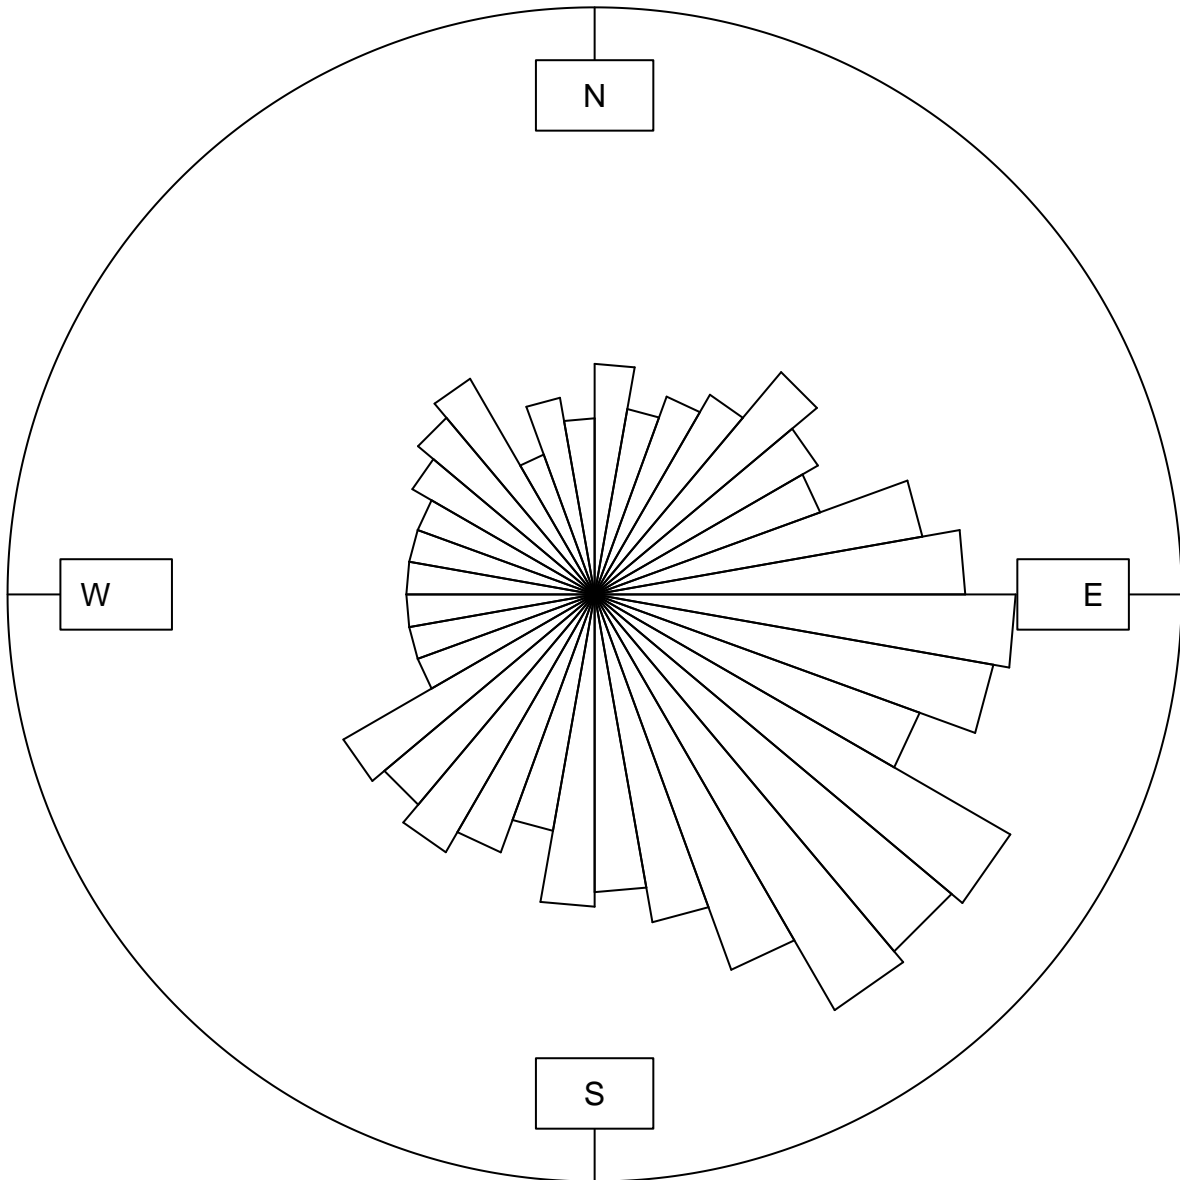

# bootstrap 642

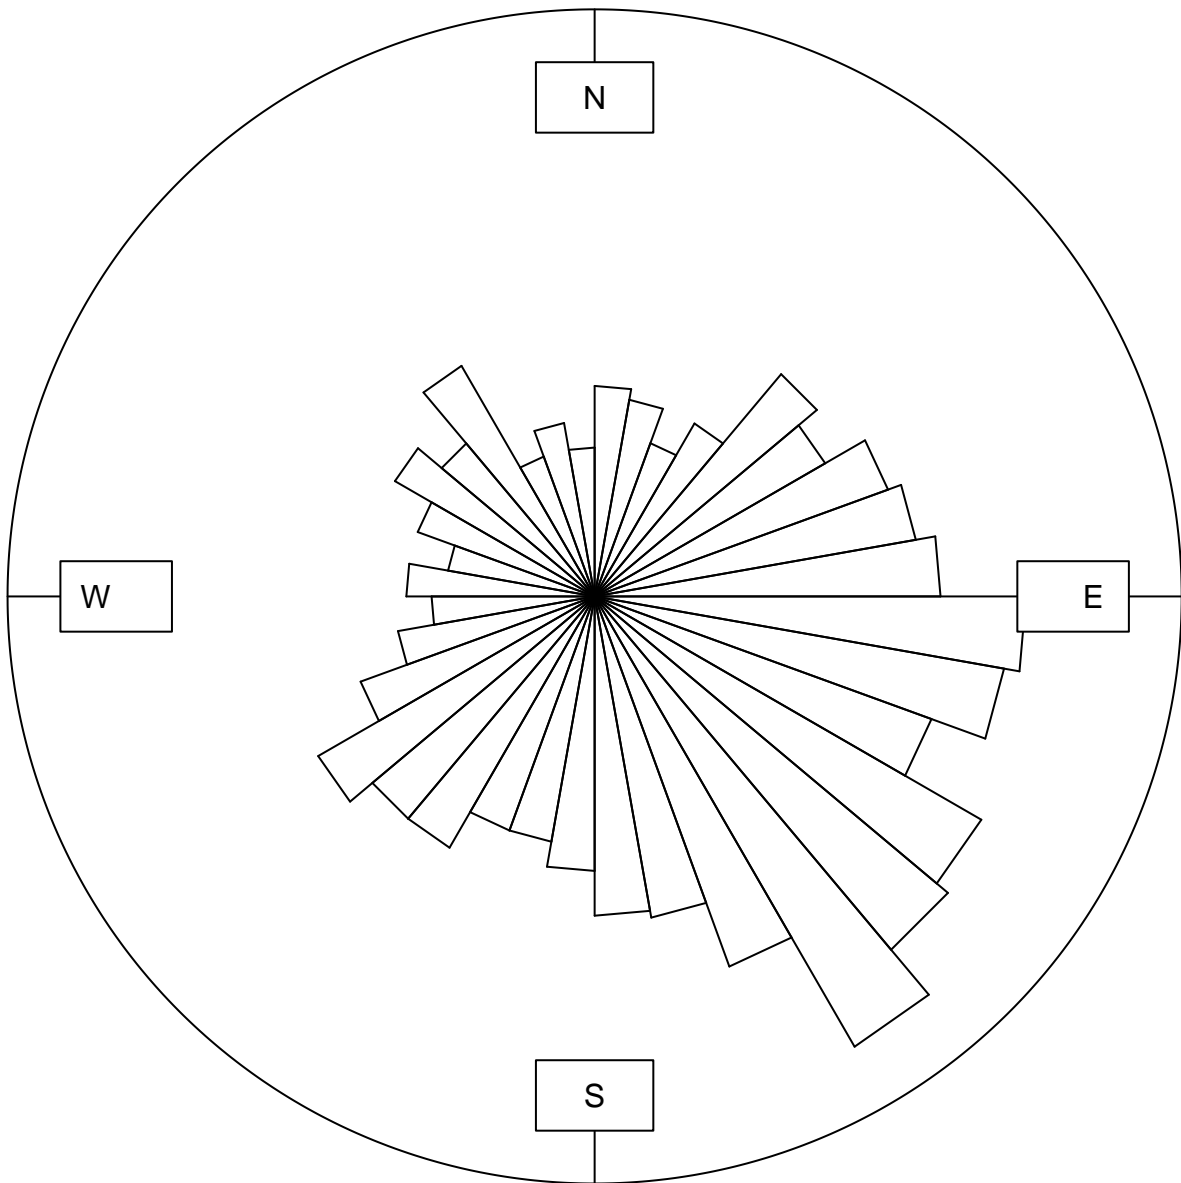

# bootstrap 643

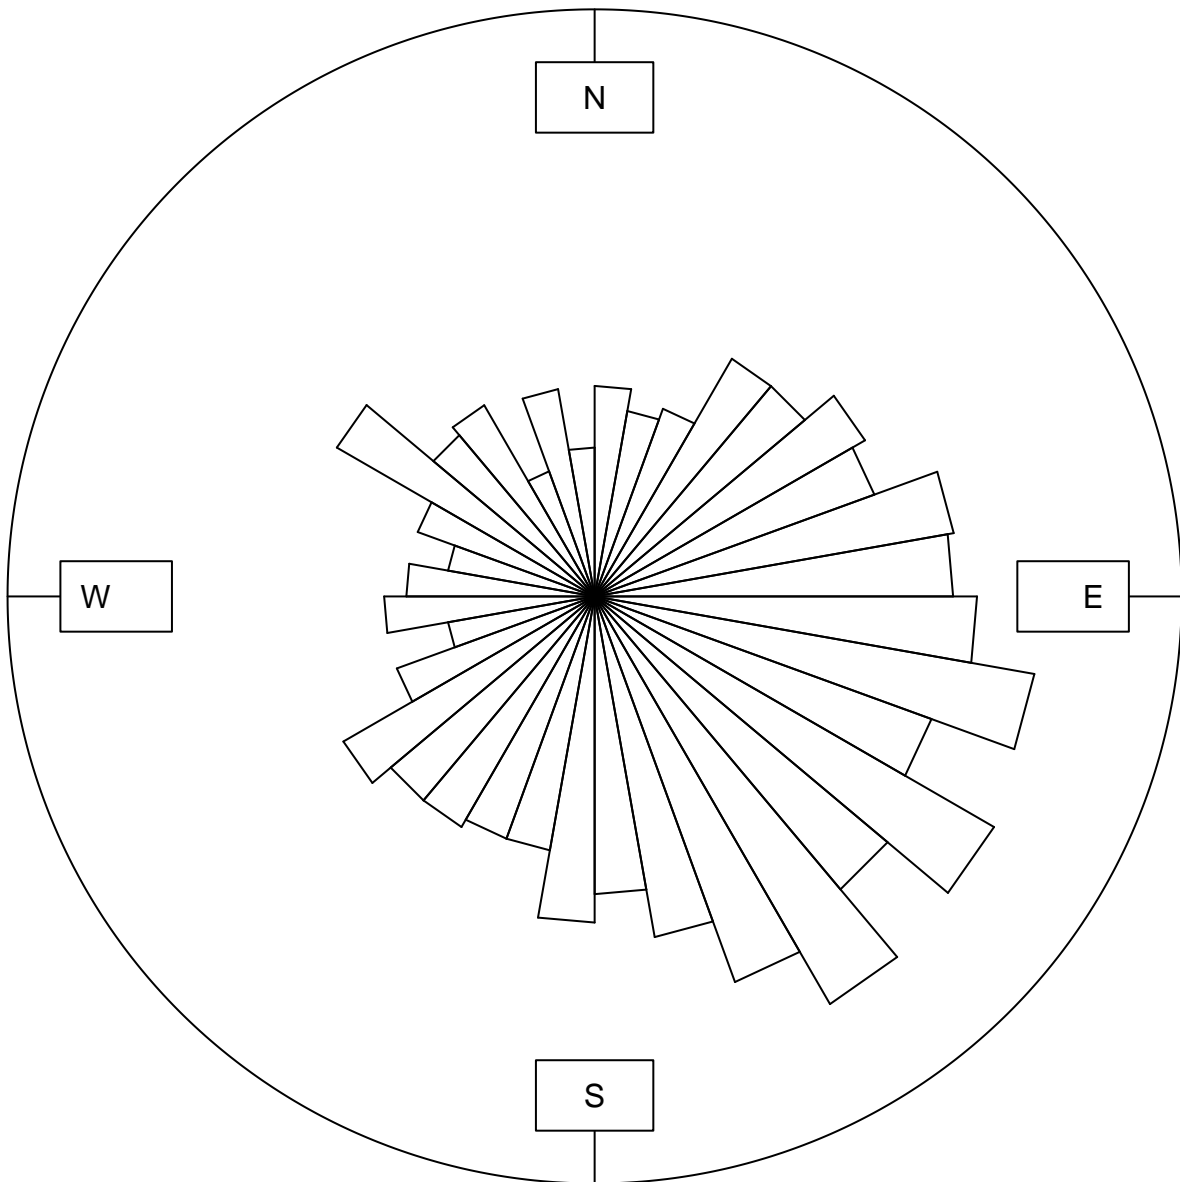

# bootstrap 644

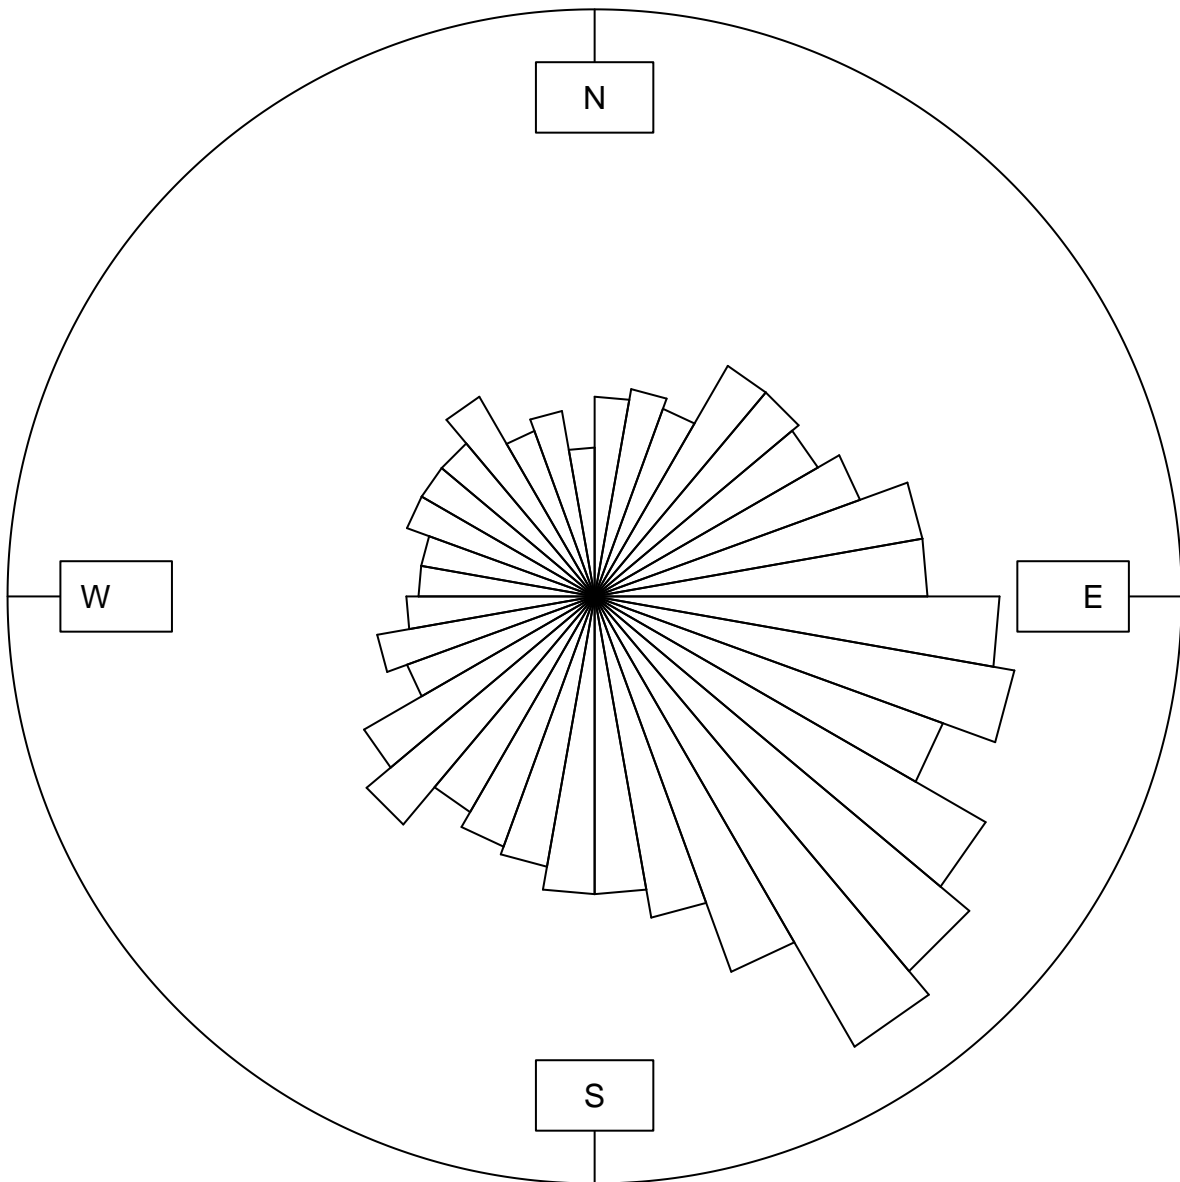

# bootstrap 645

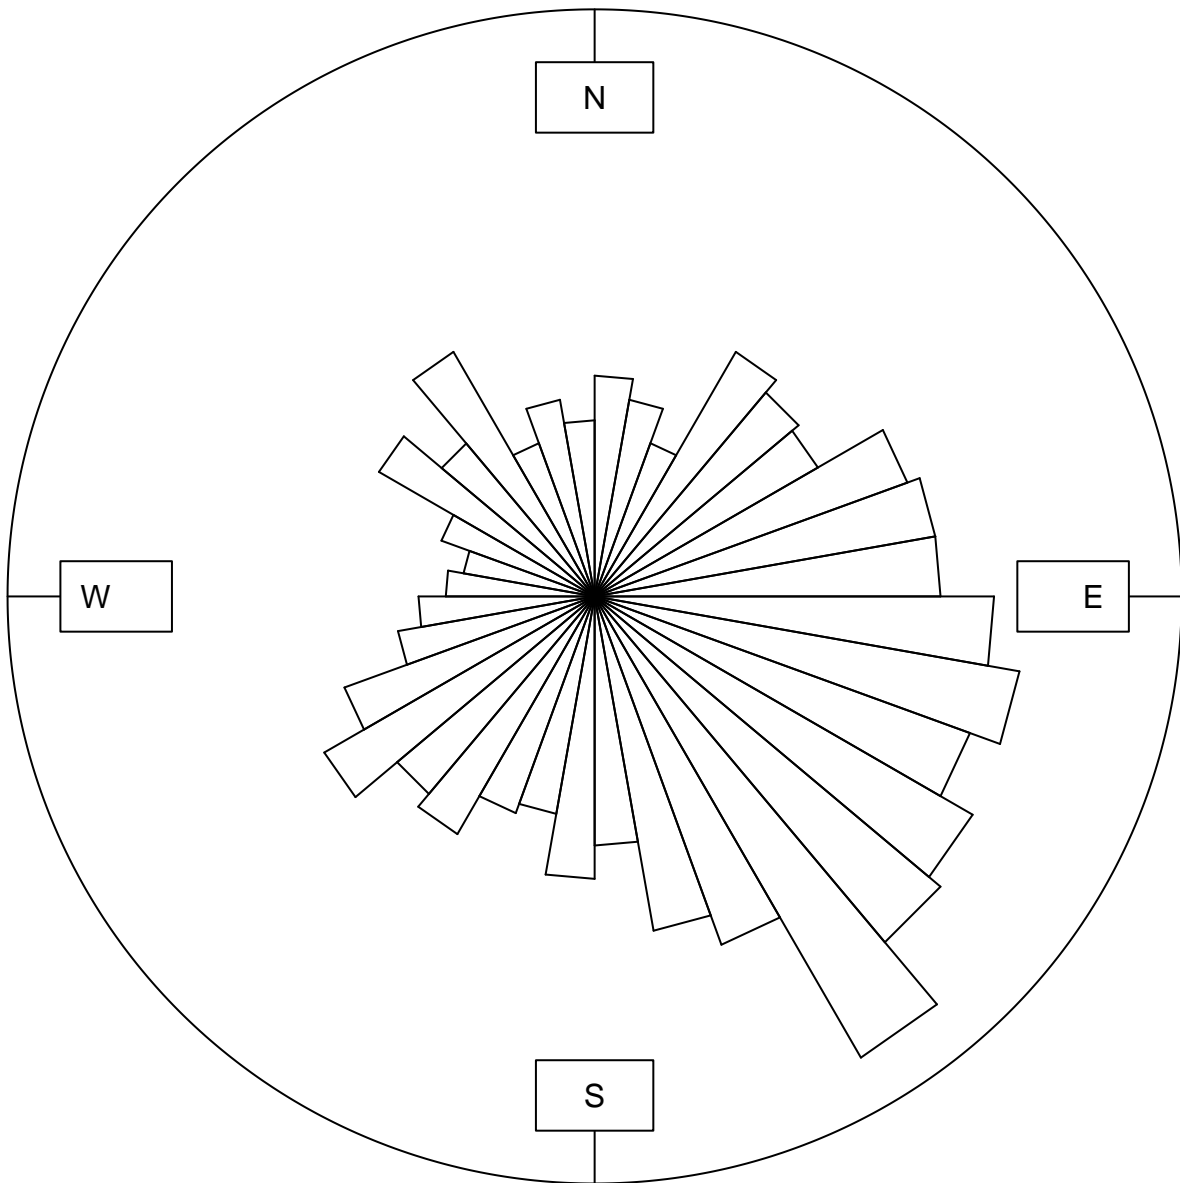

# bootstrap 646

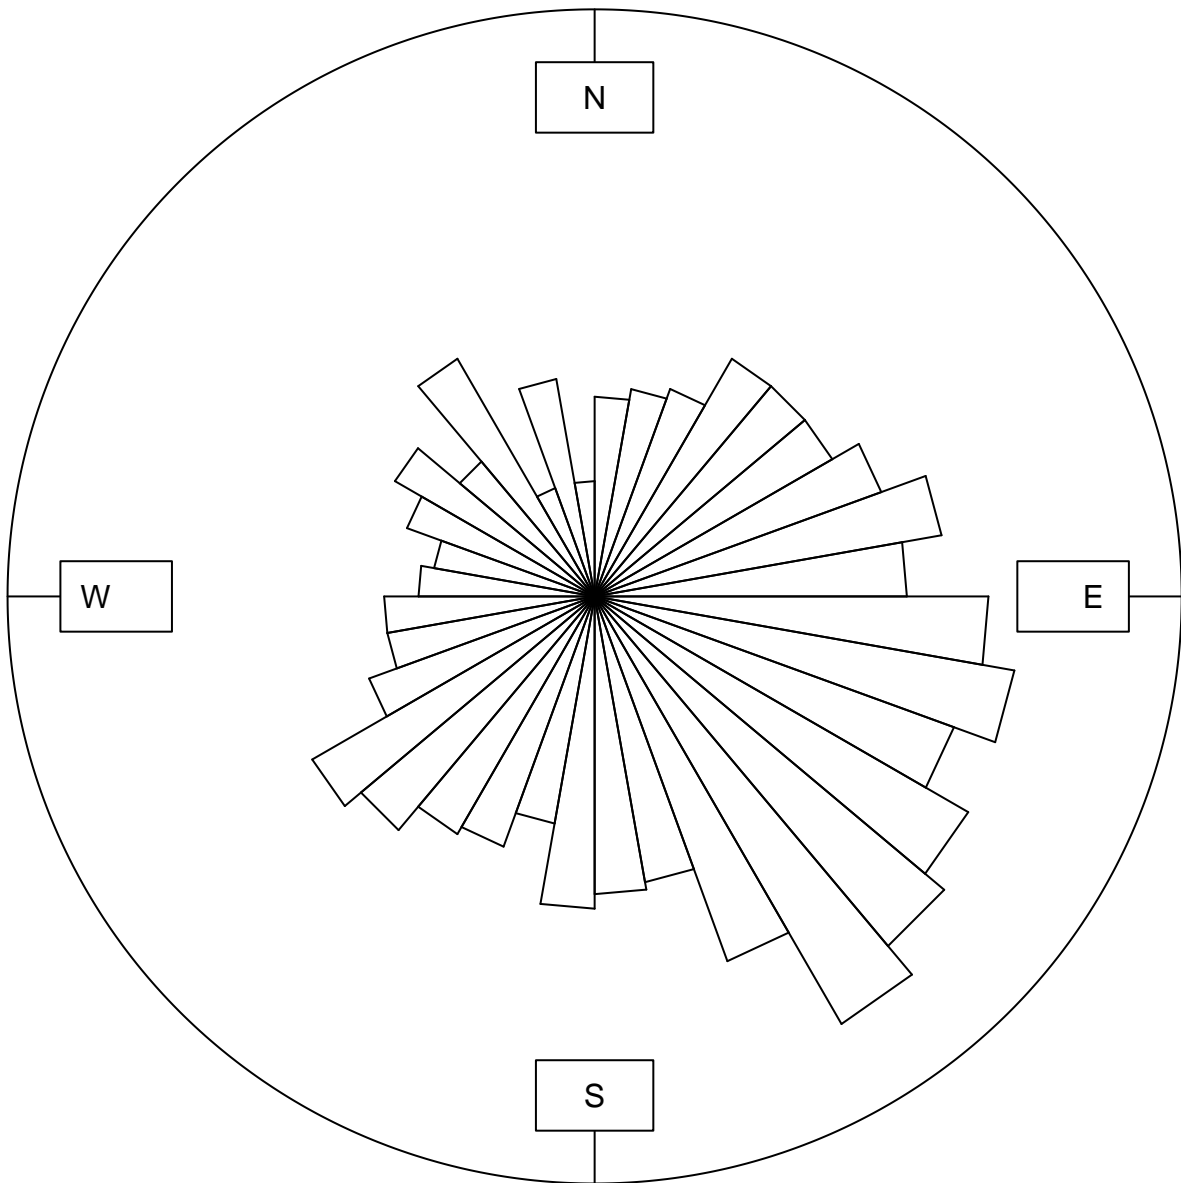

# bootstrap 647

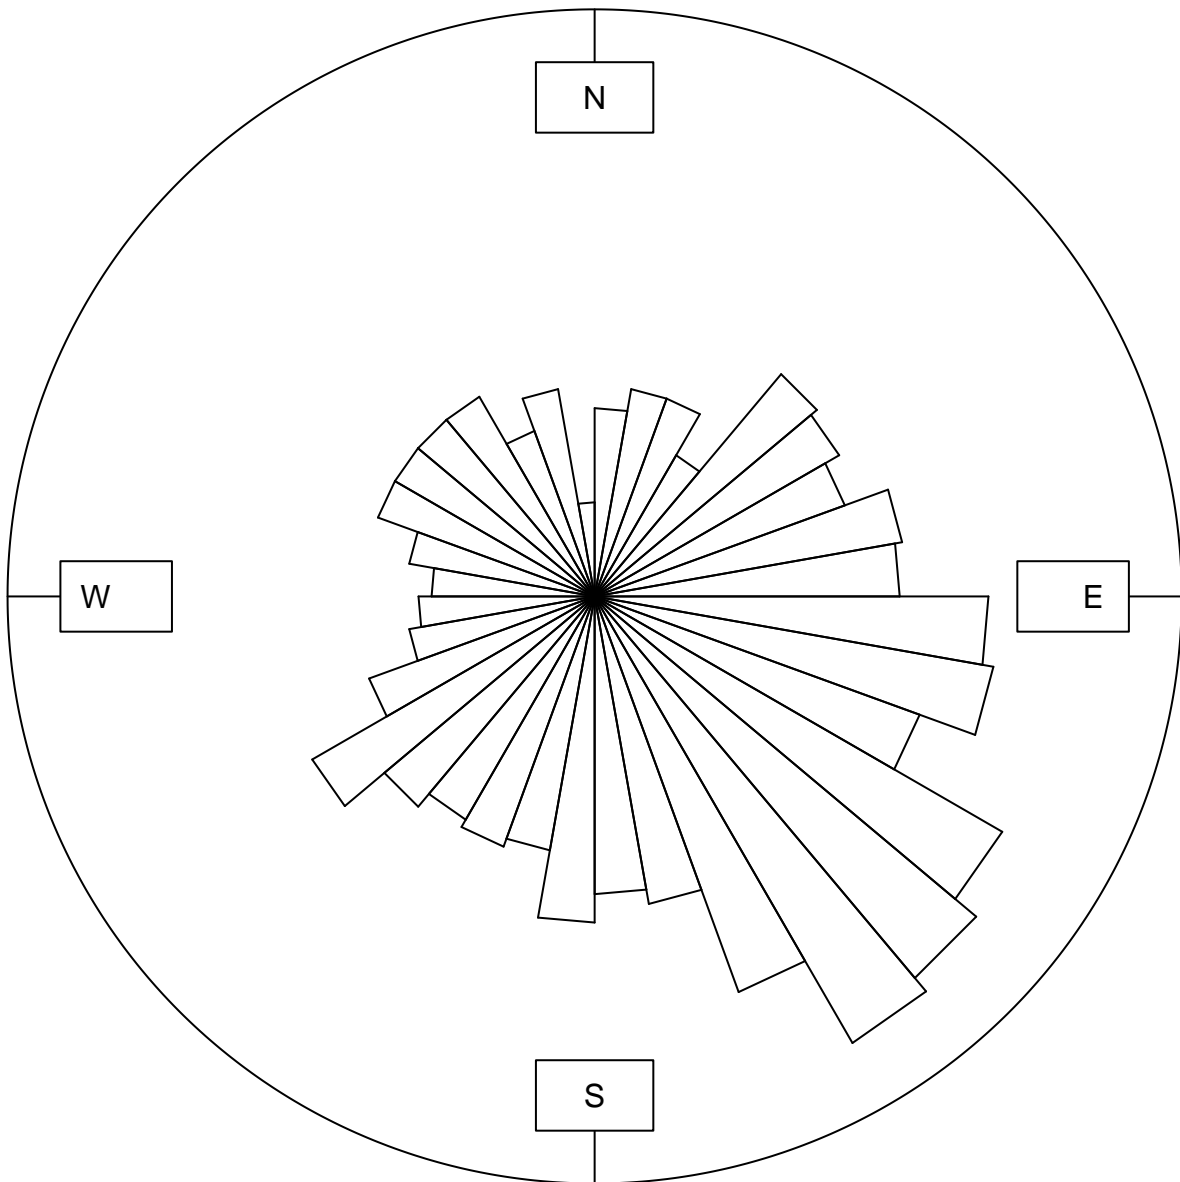

# bootstrap 648

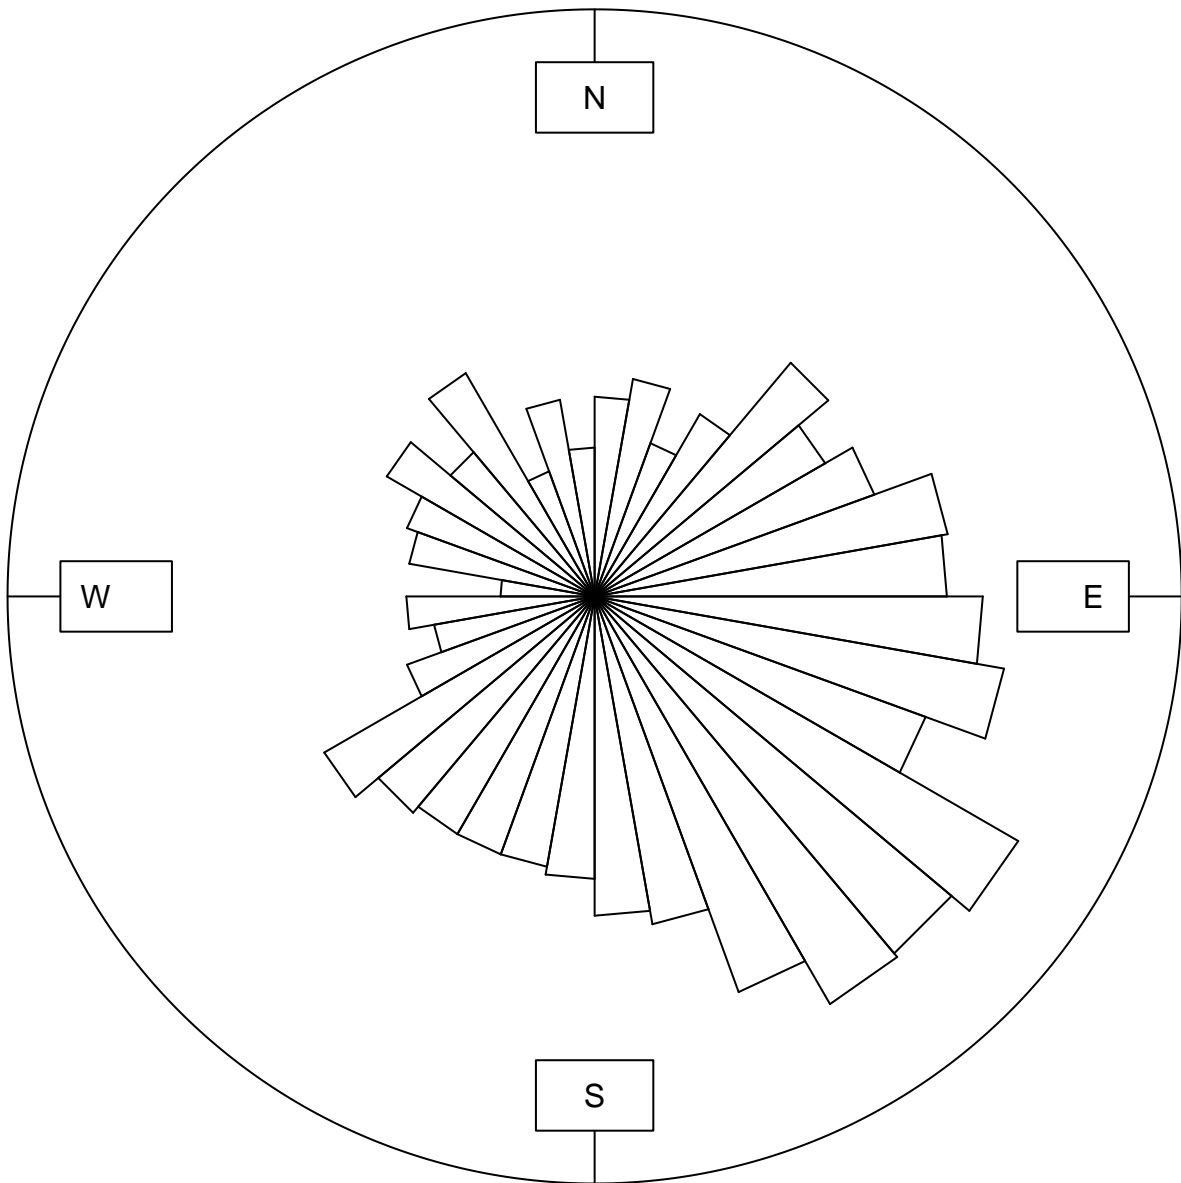



# bootstrap 649

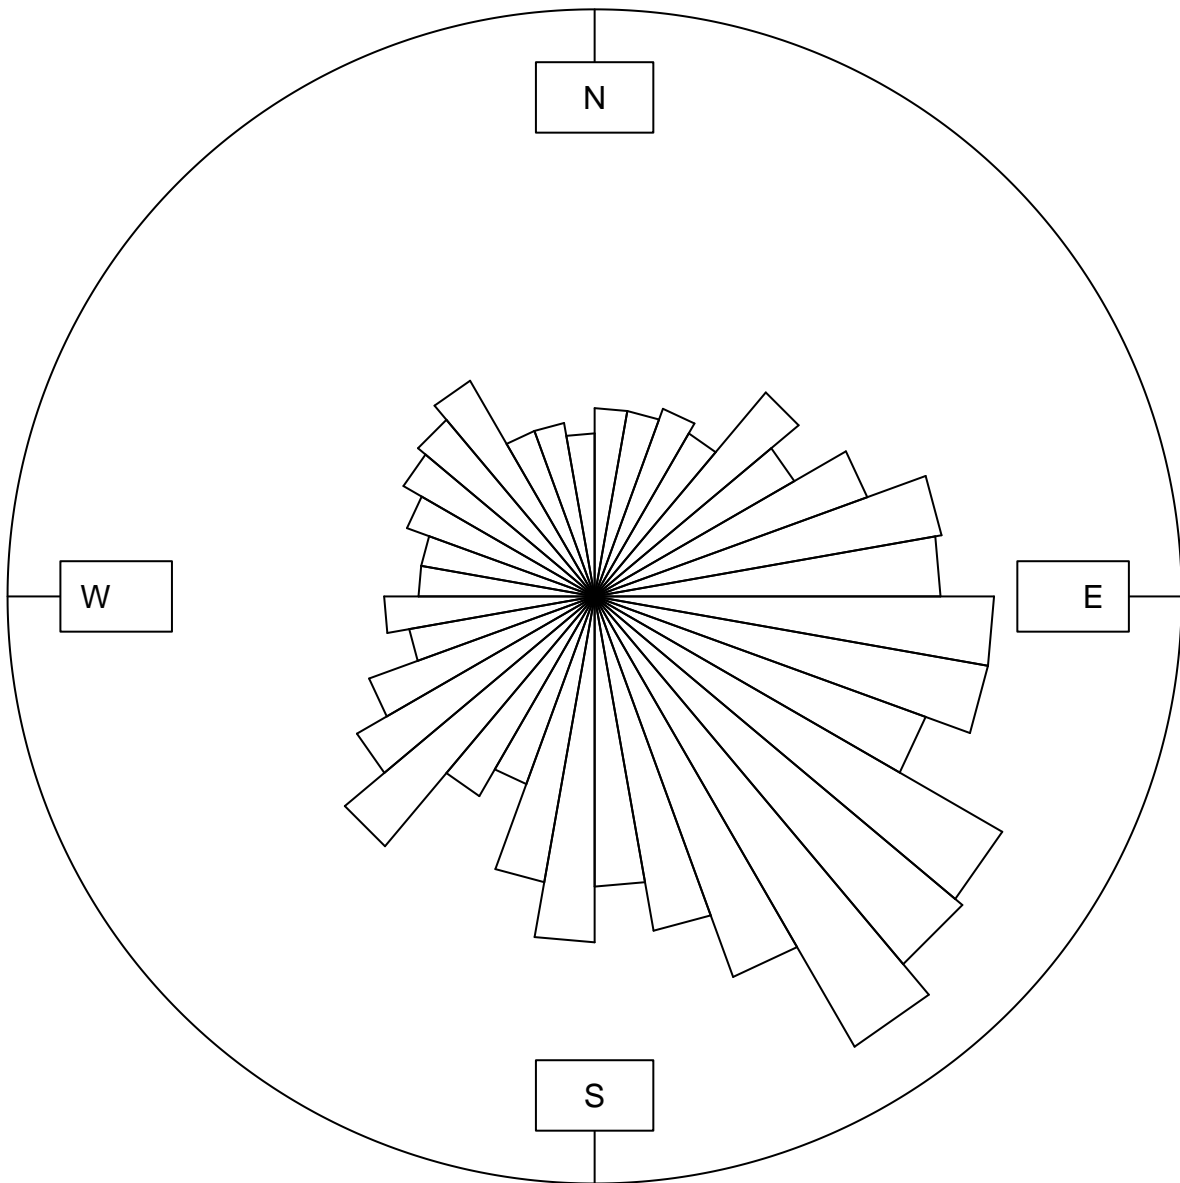

# bootstrap 650

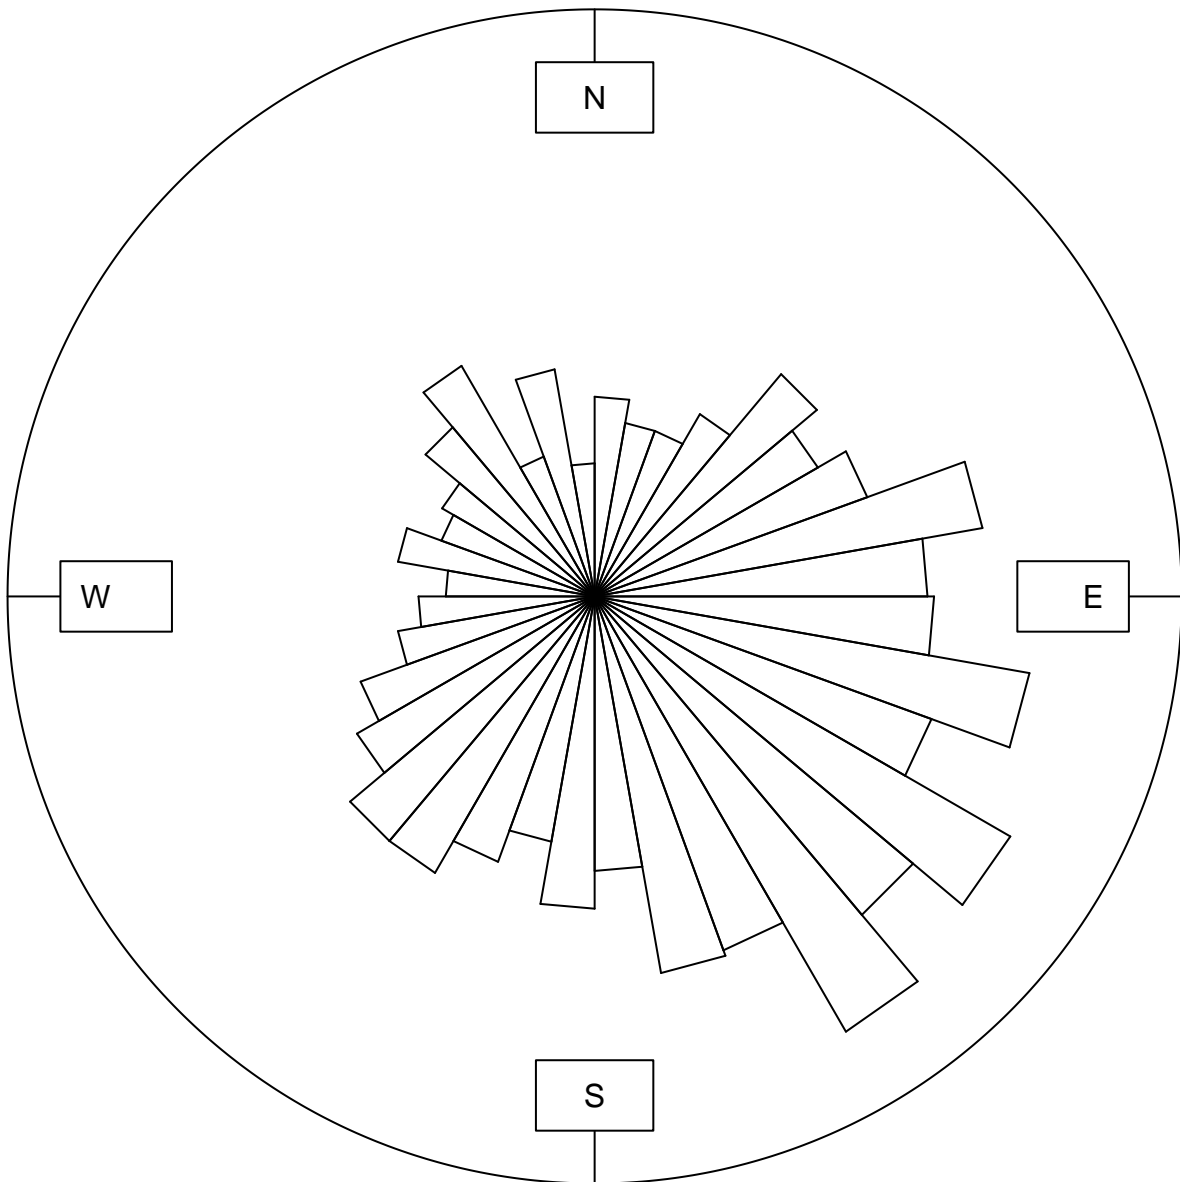

# bootstrap 651

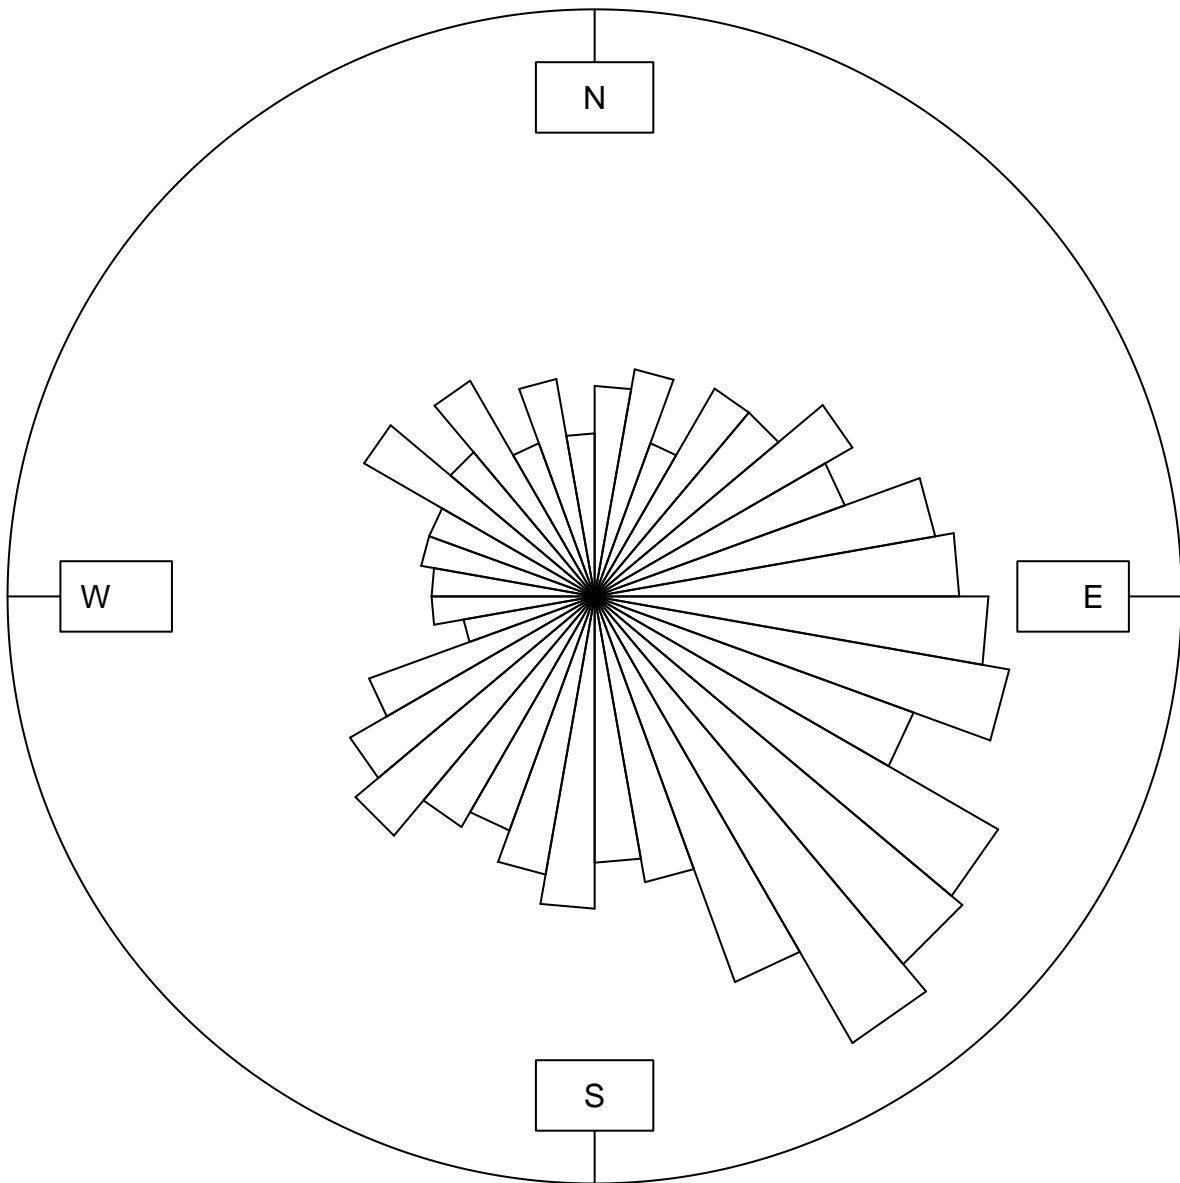

# bootstrap 652

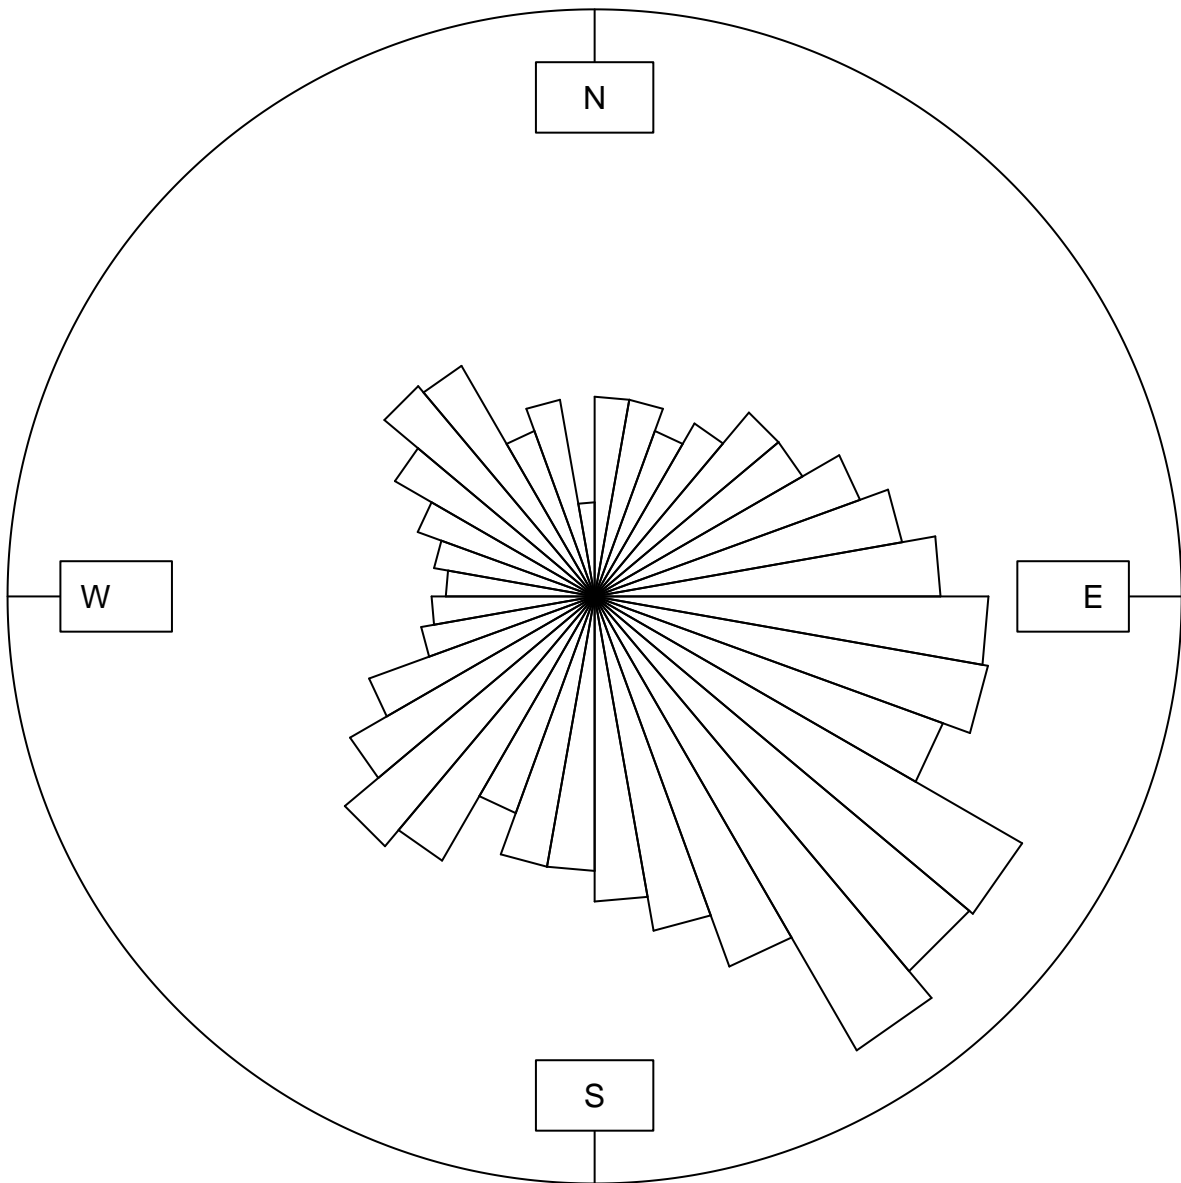

# bootstrap 653

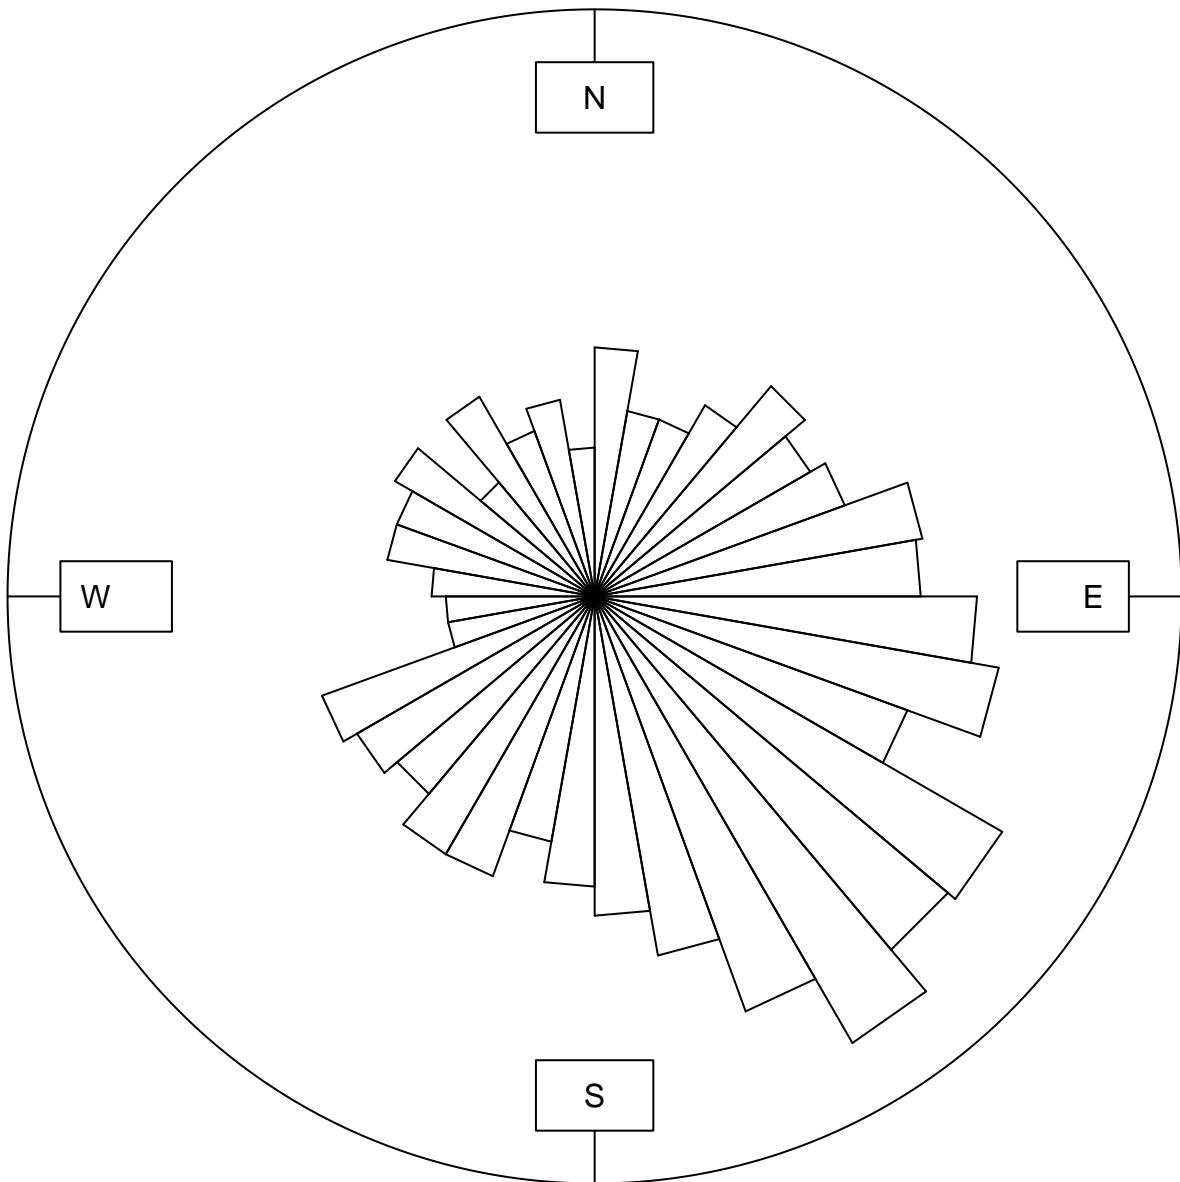

# bootstrap 654

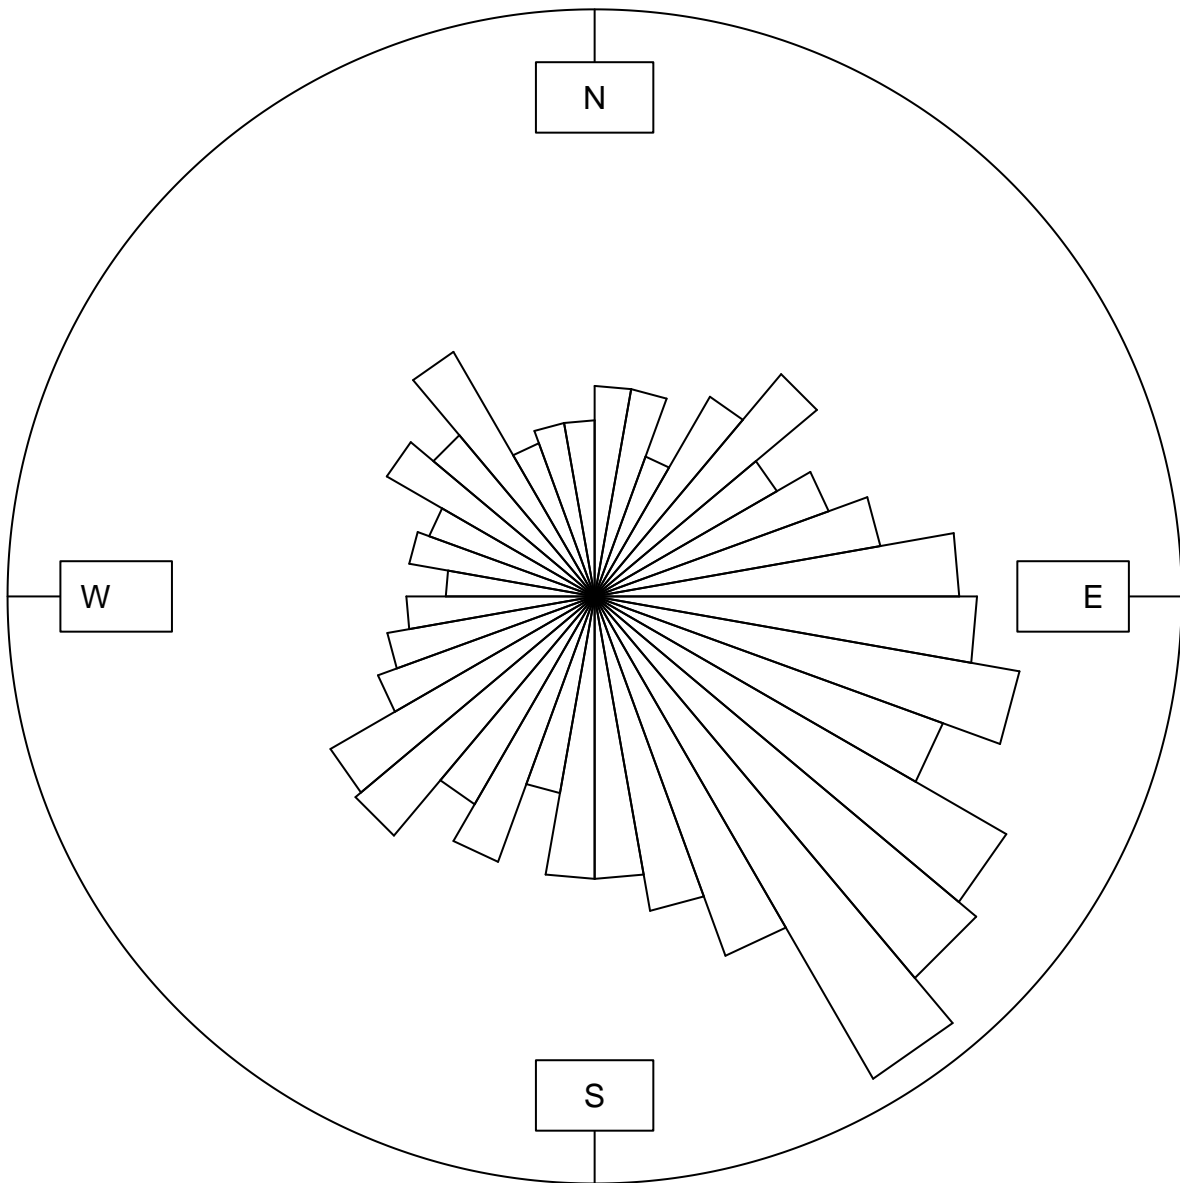

# bootstrap 655

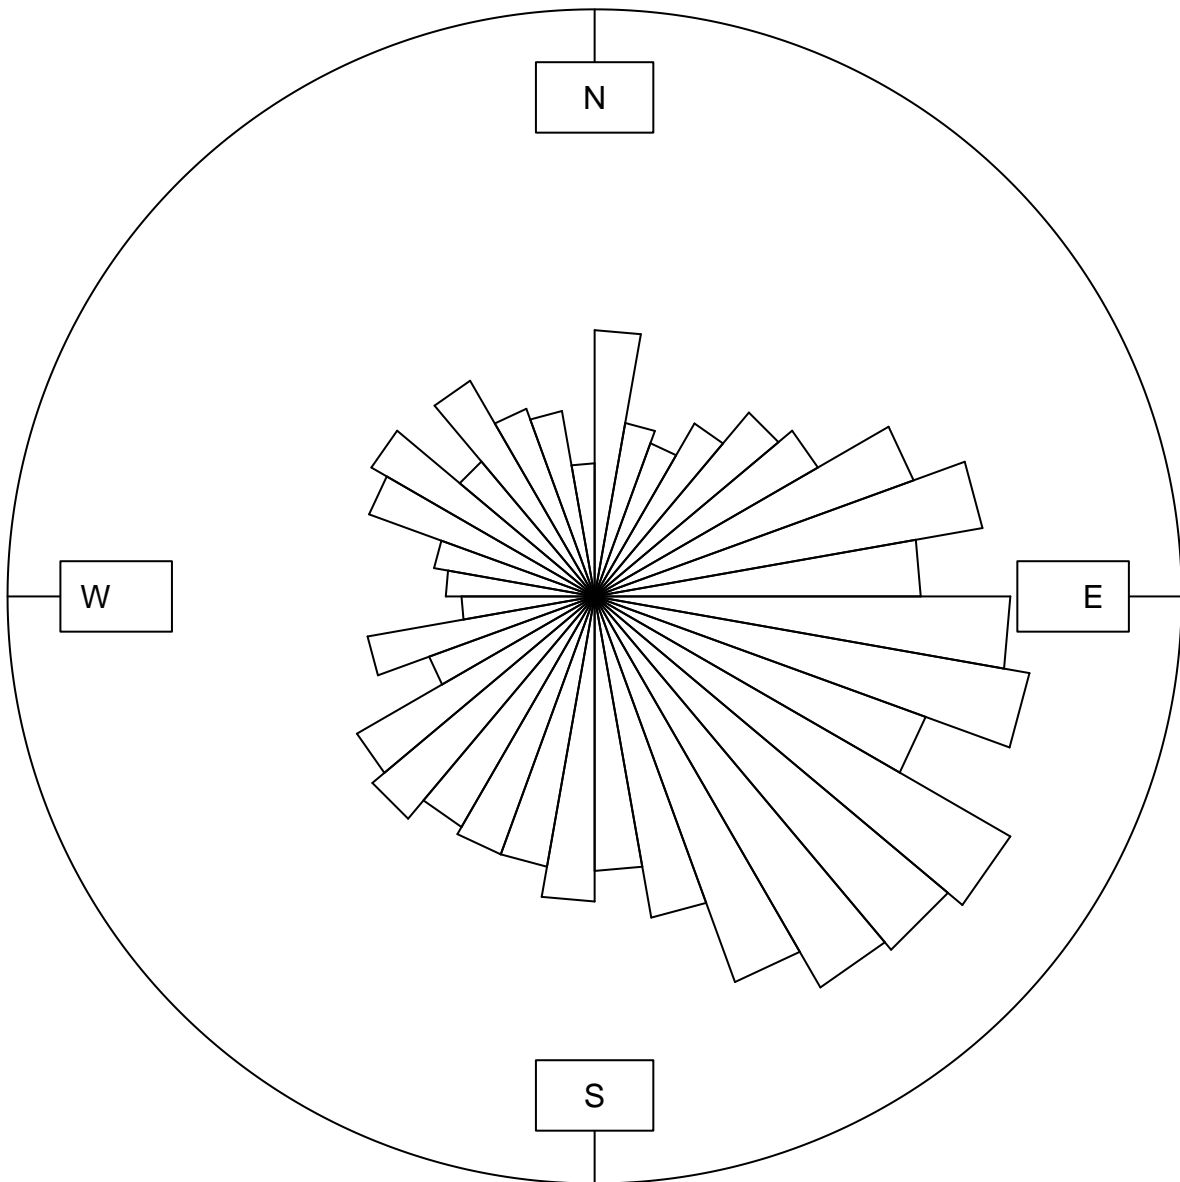

# bootstrap 656

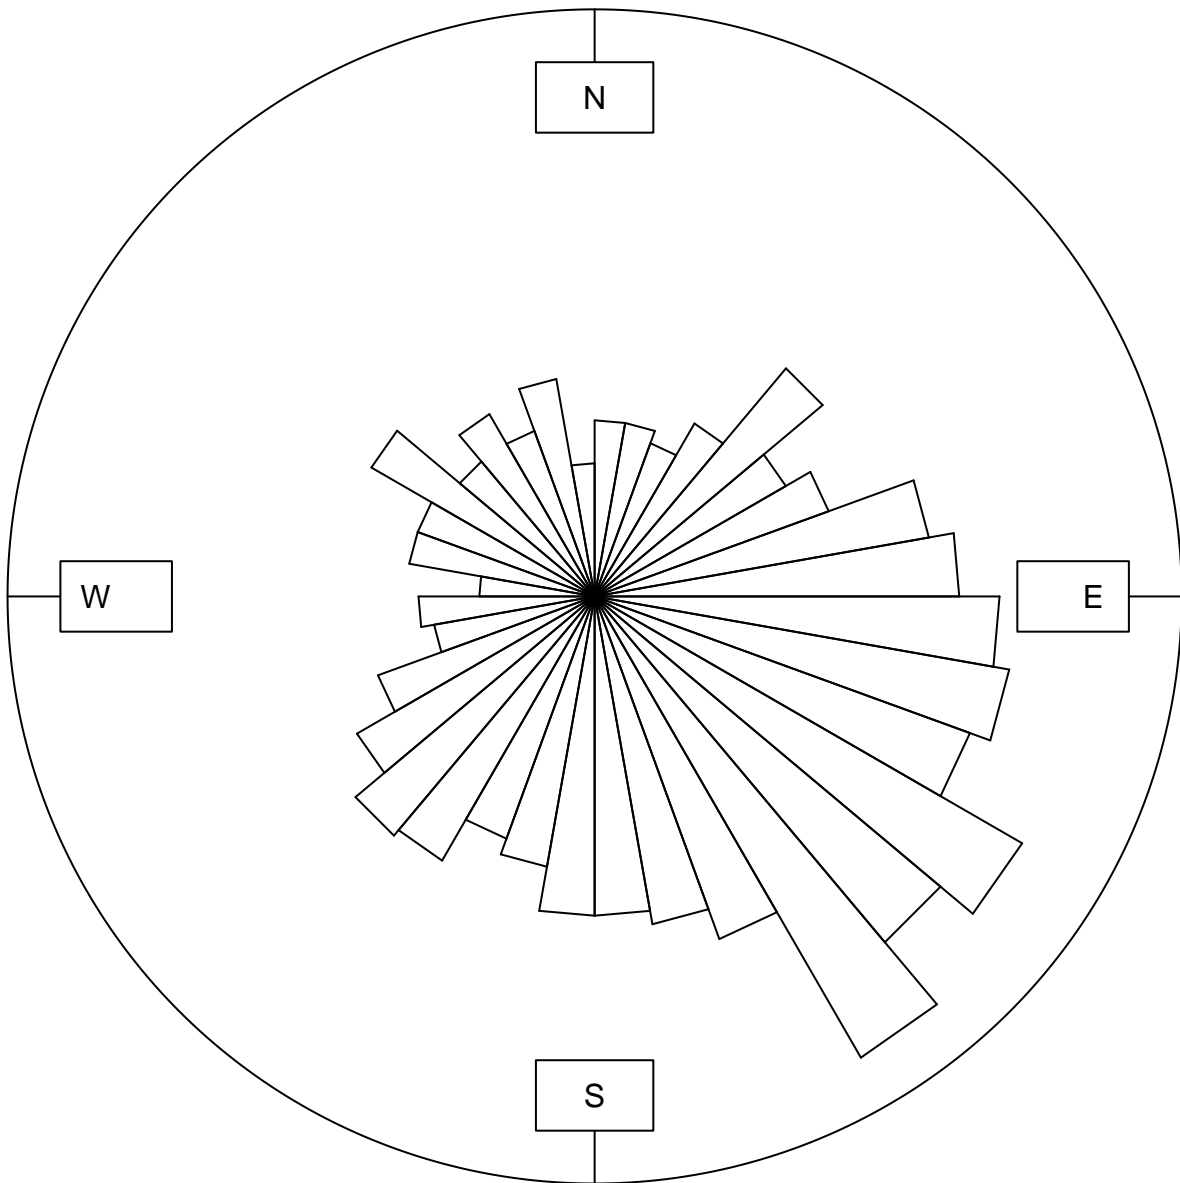



# bootstrap 657

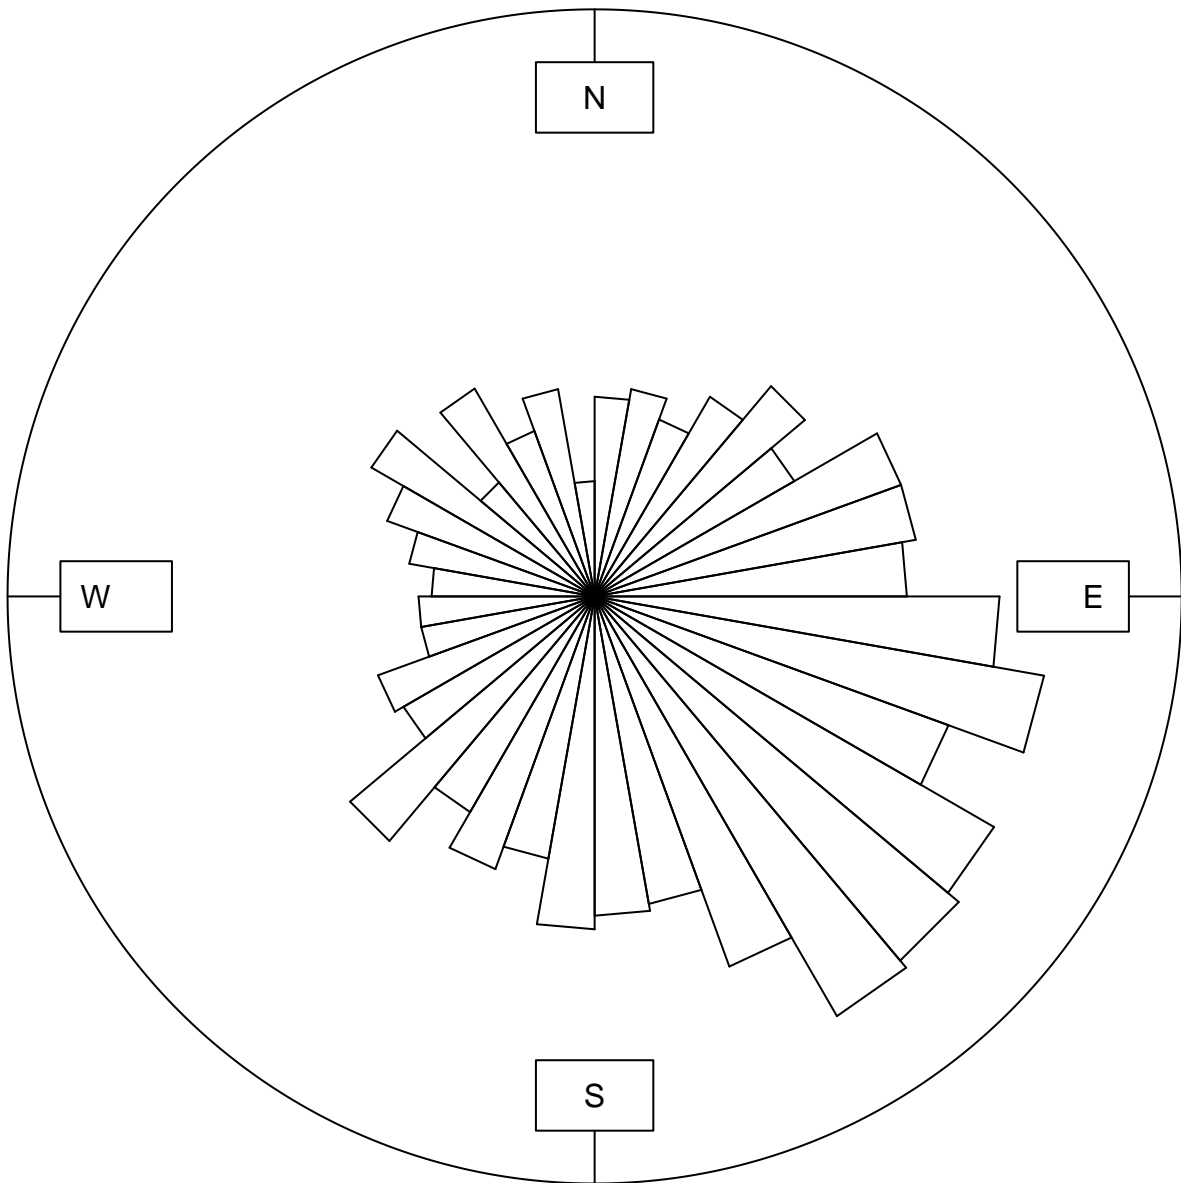

# bootstrap 658

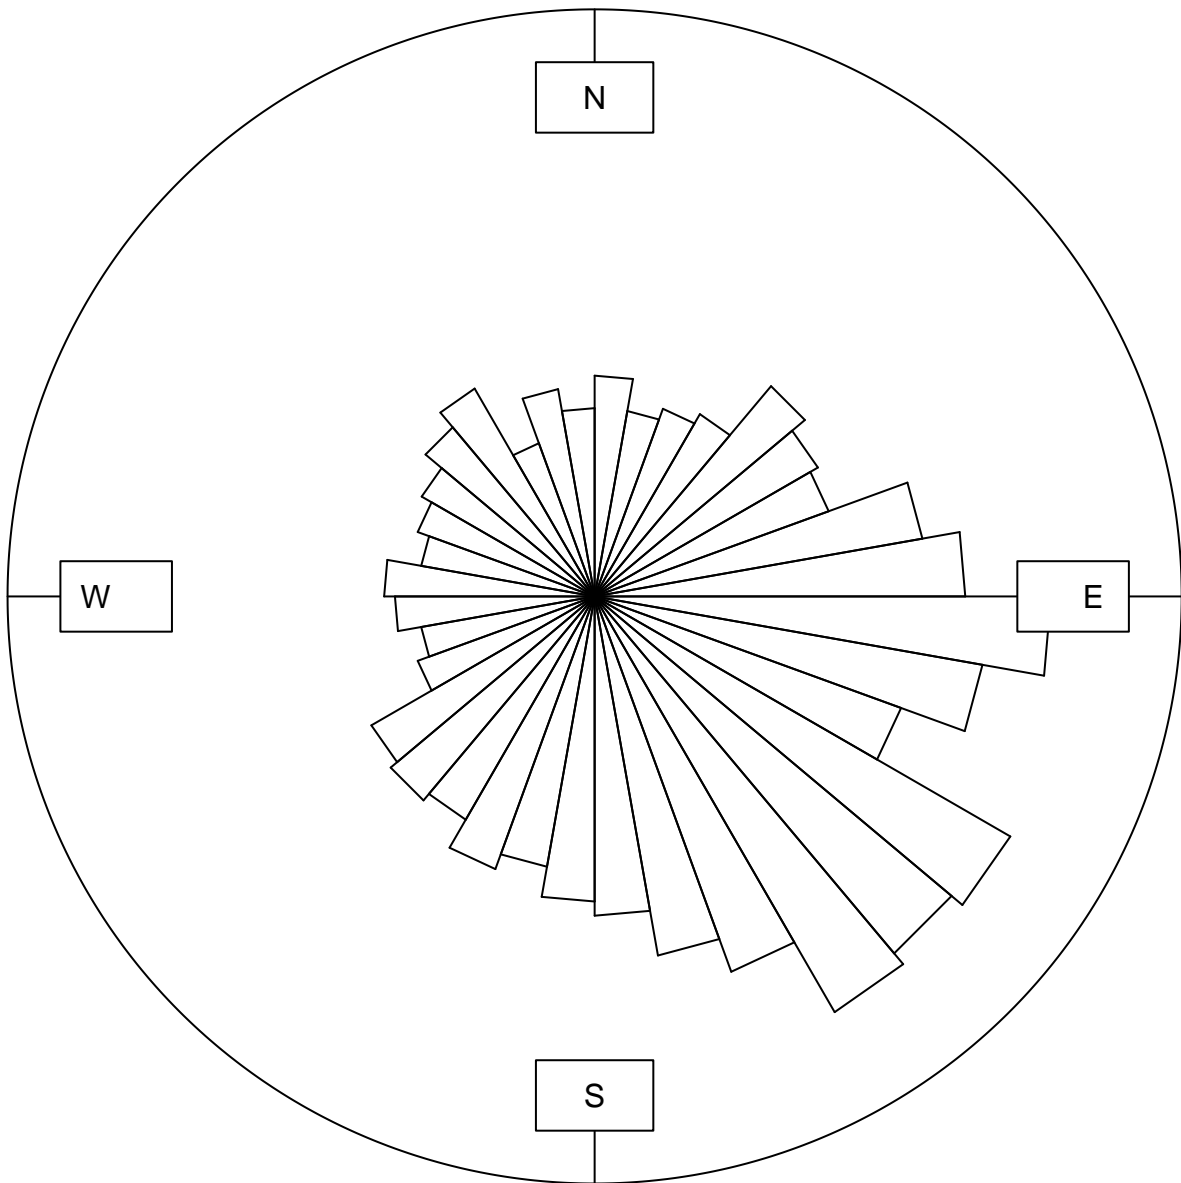

# bootstrap 659

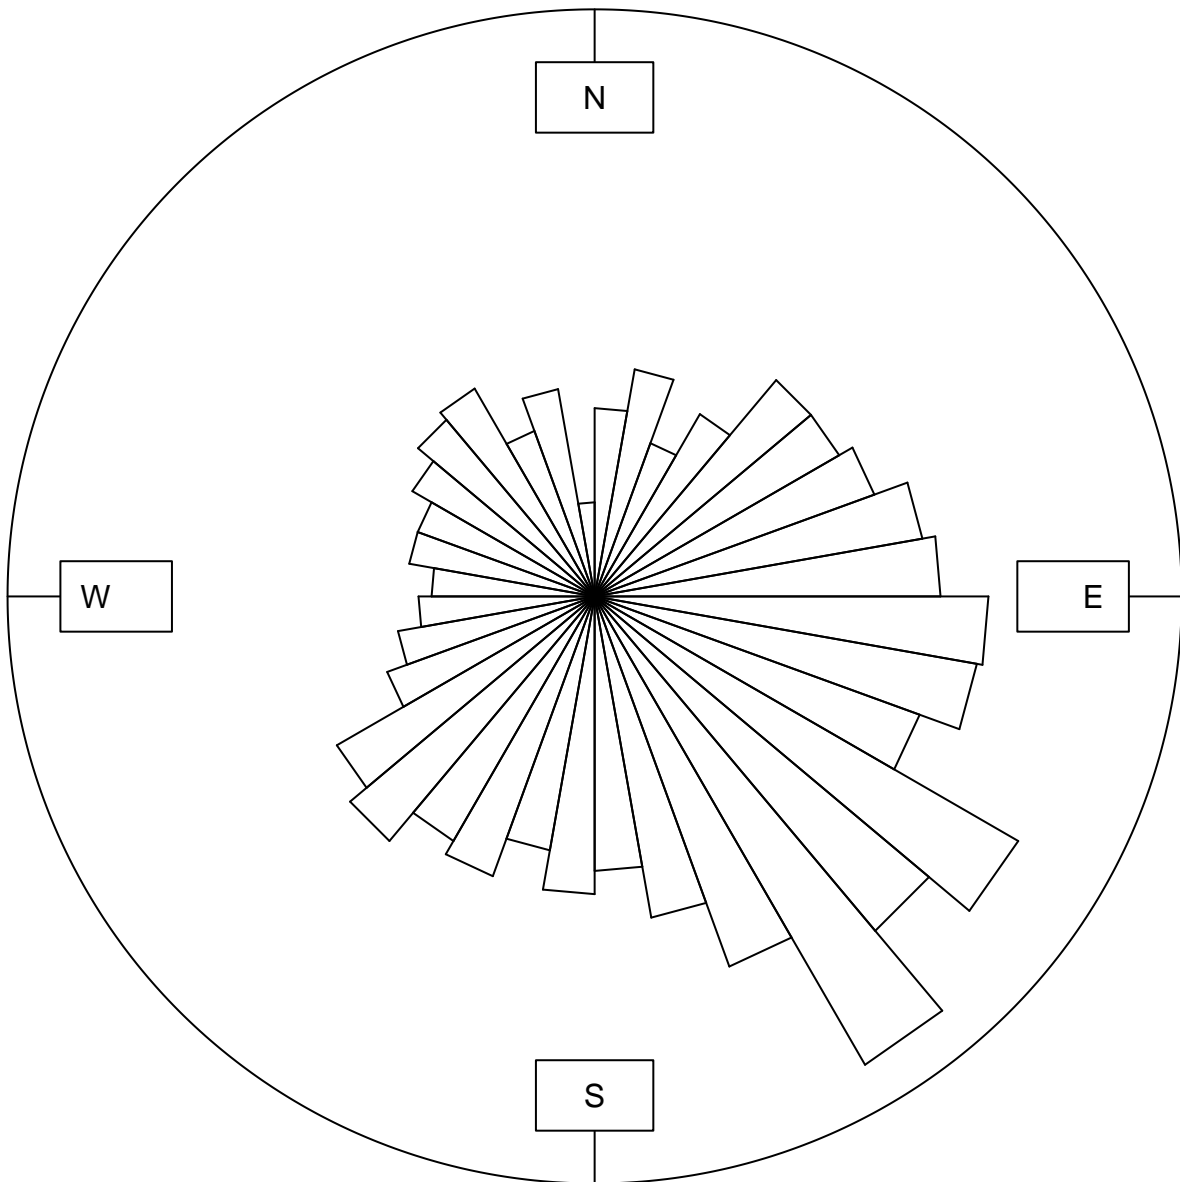

# bootstrap 660

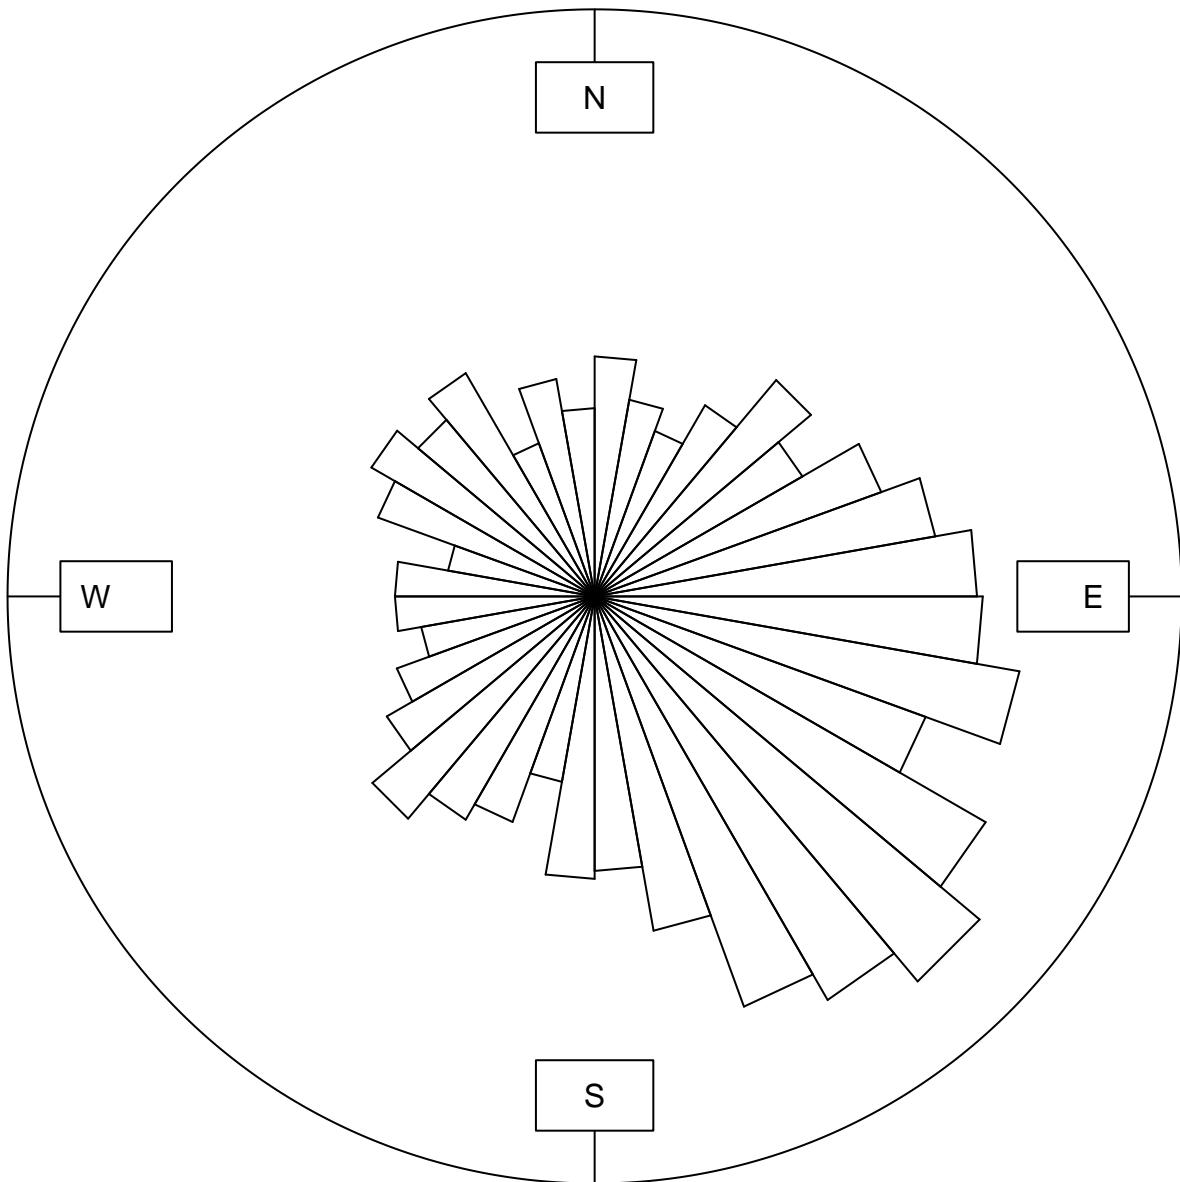

# bootstrap 661

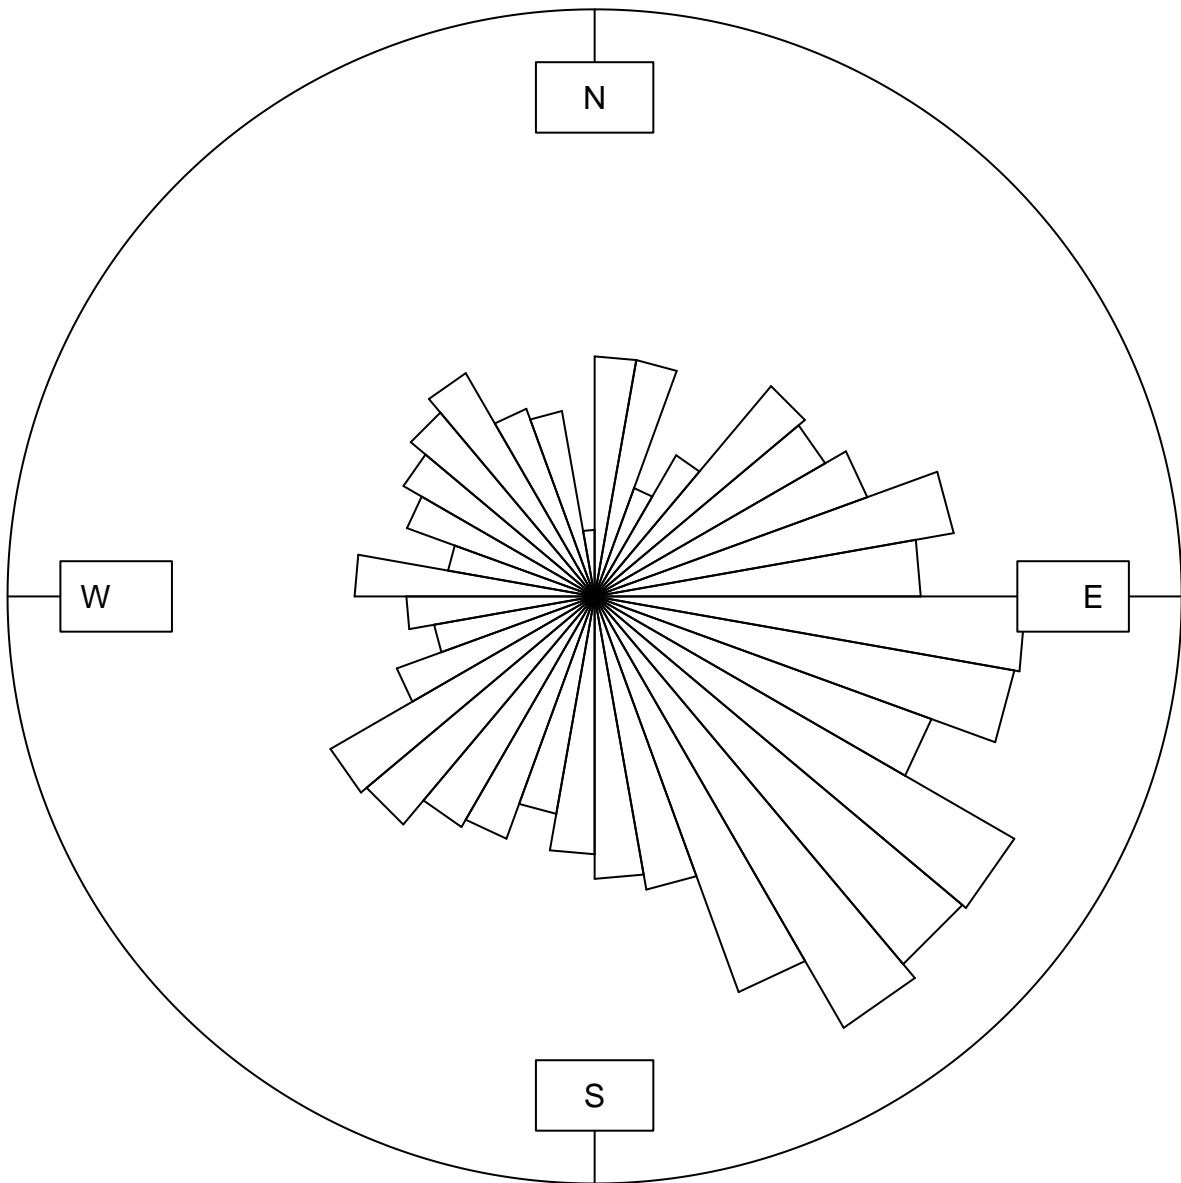

# bootstrap 662

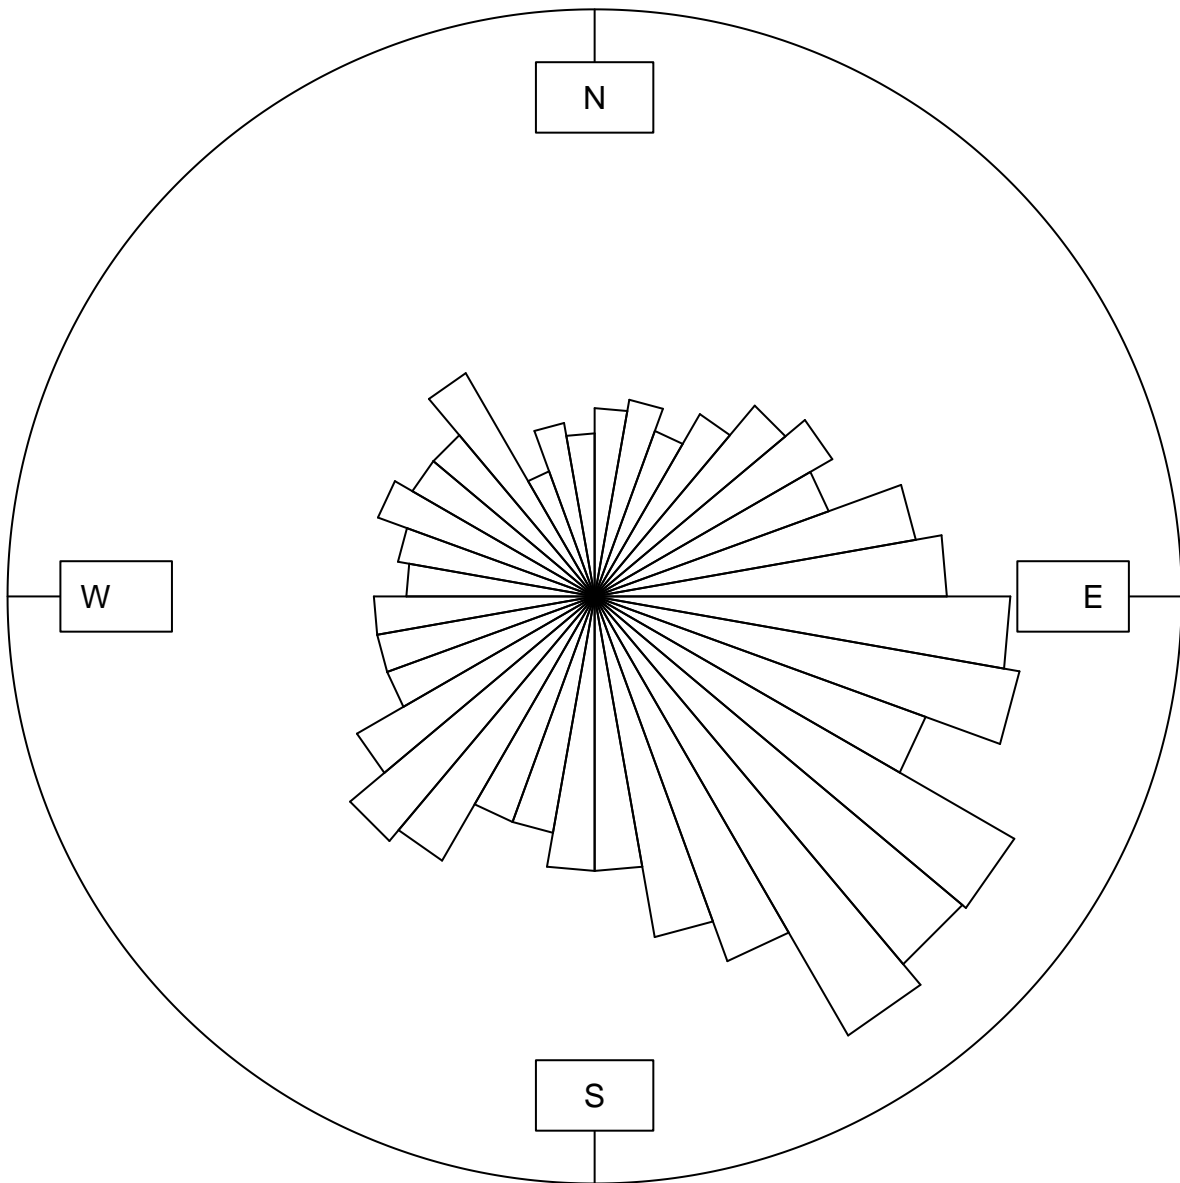

# bootstrap 663

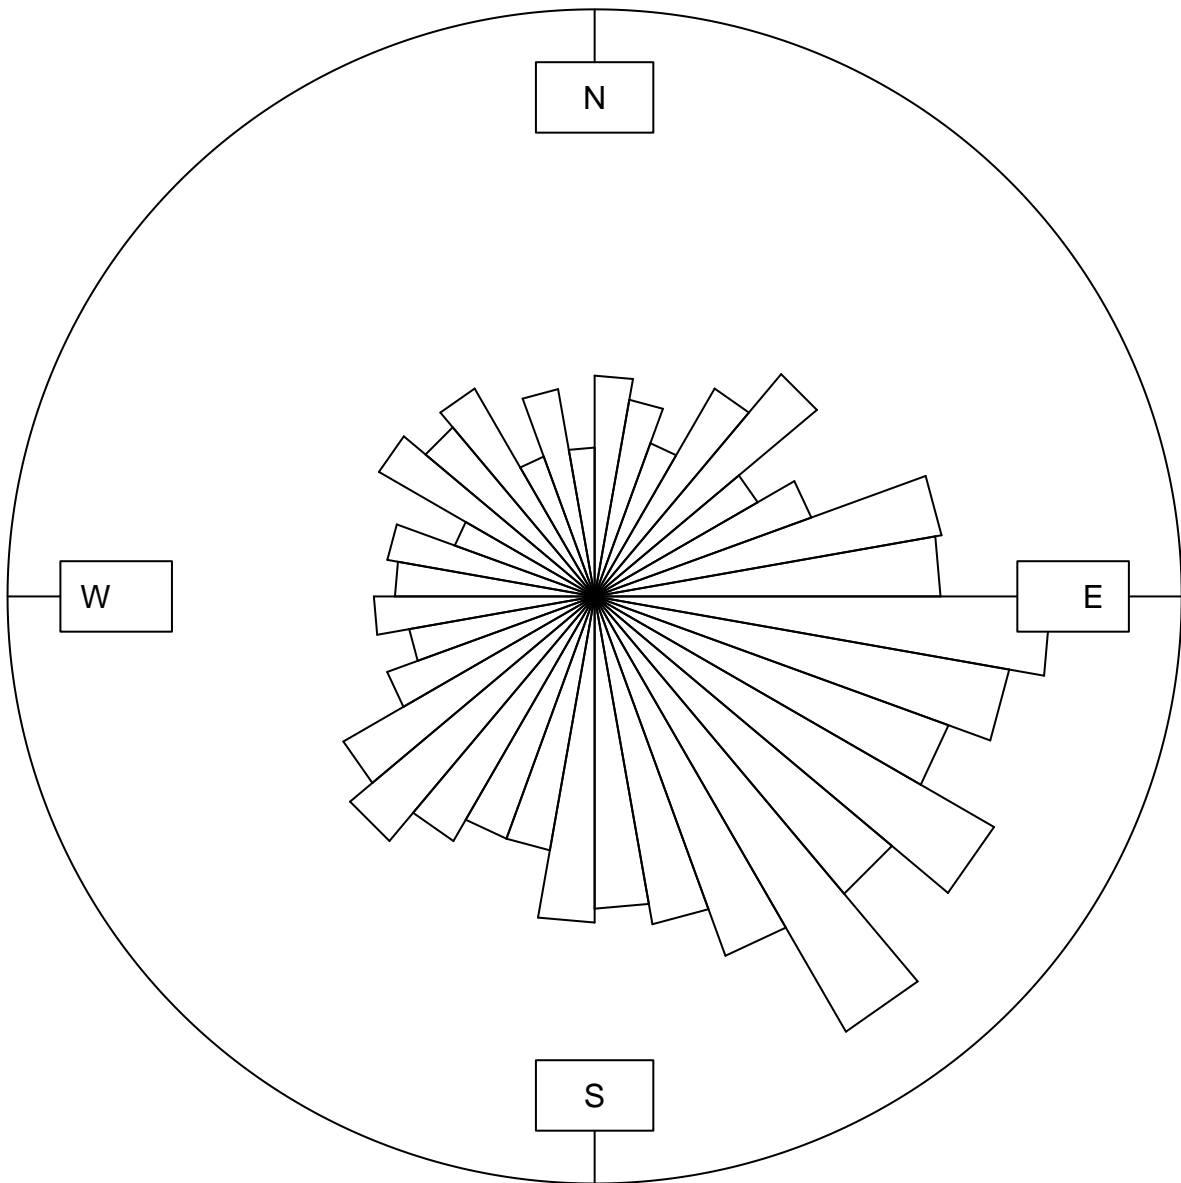

# bootstrap 664

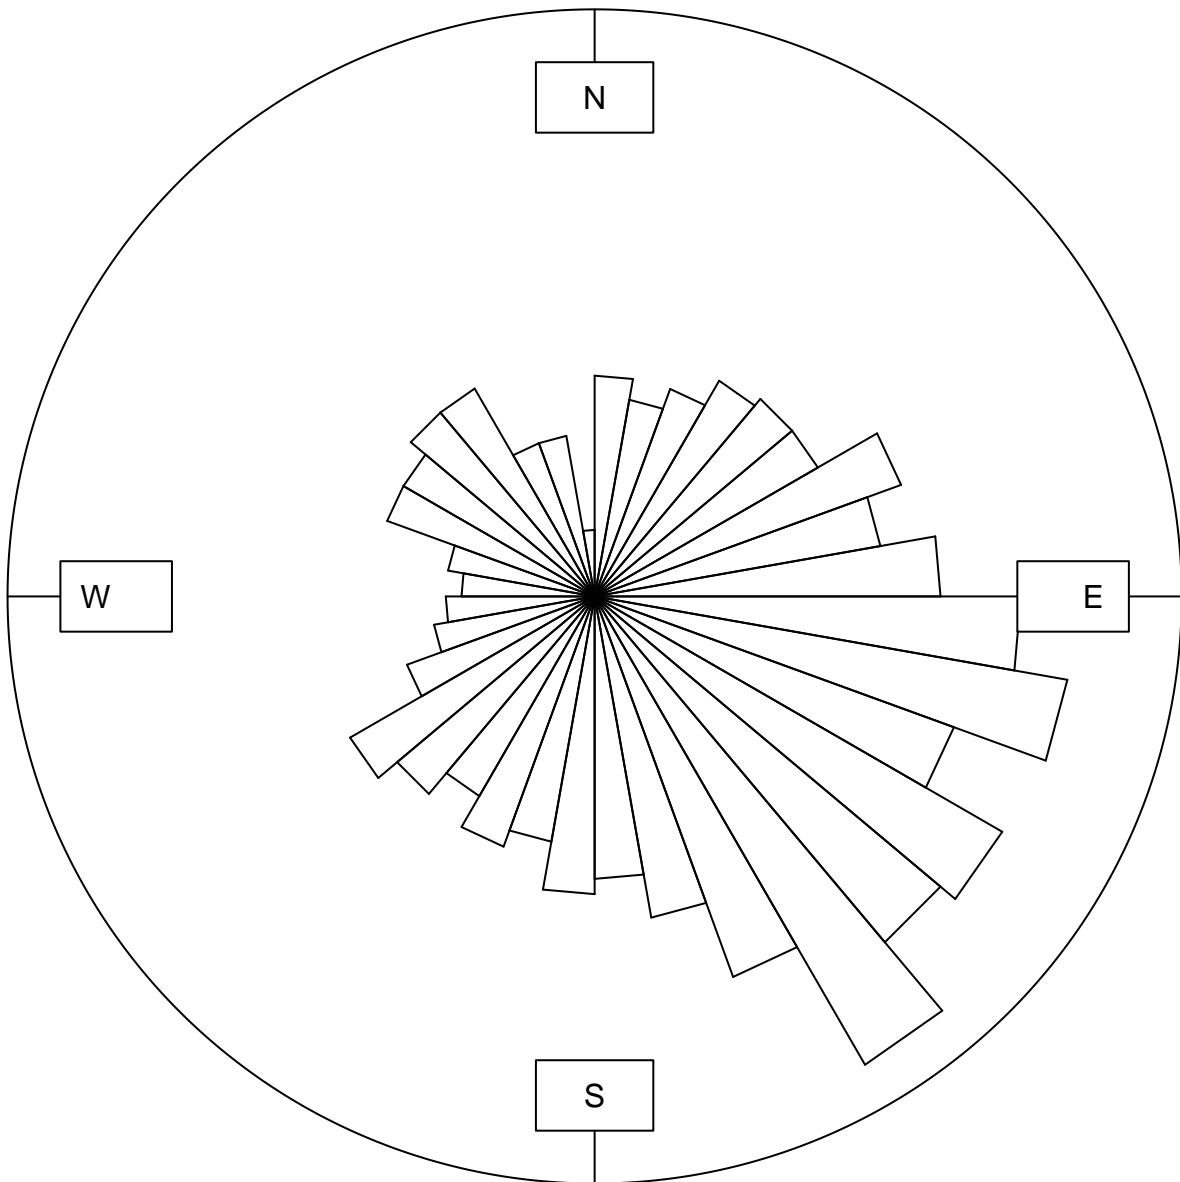



# bootstrap 665

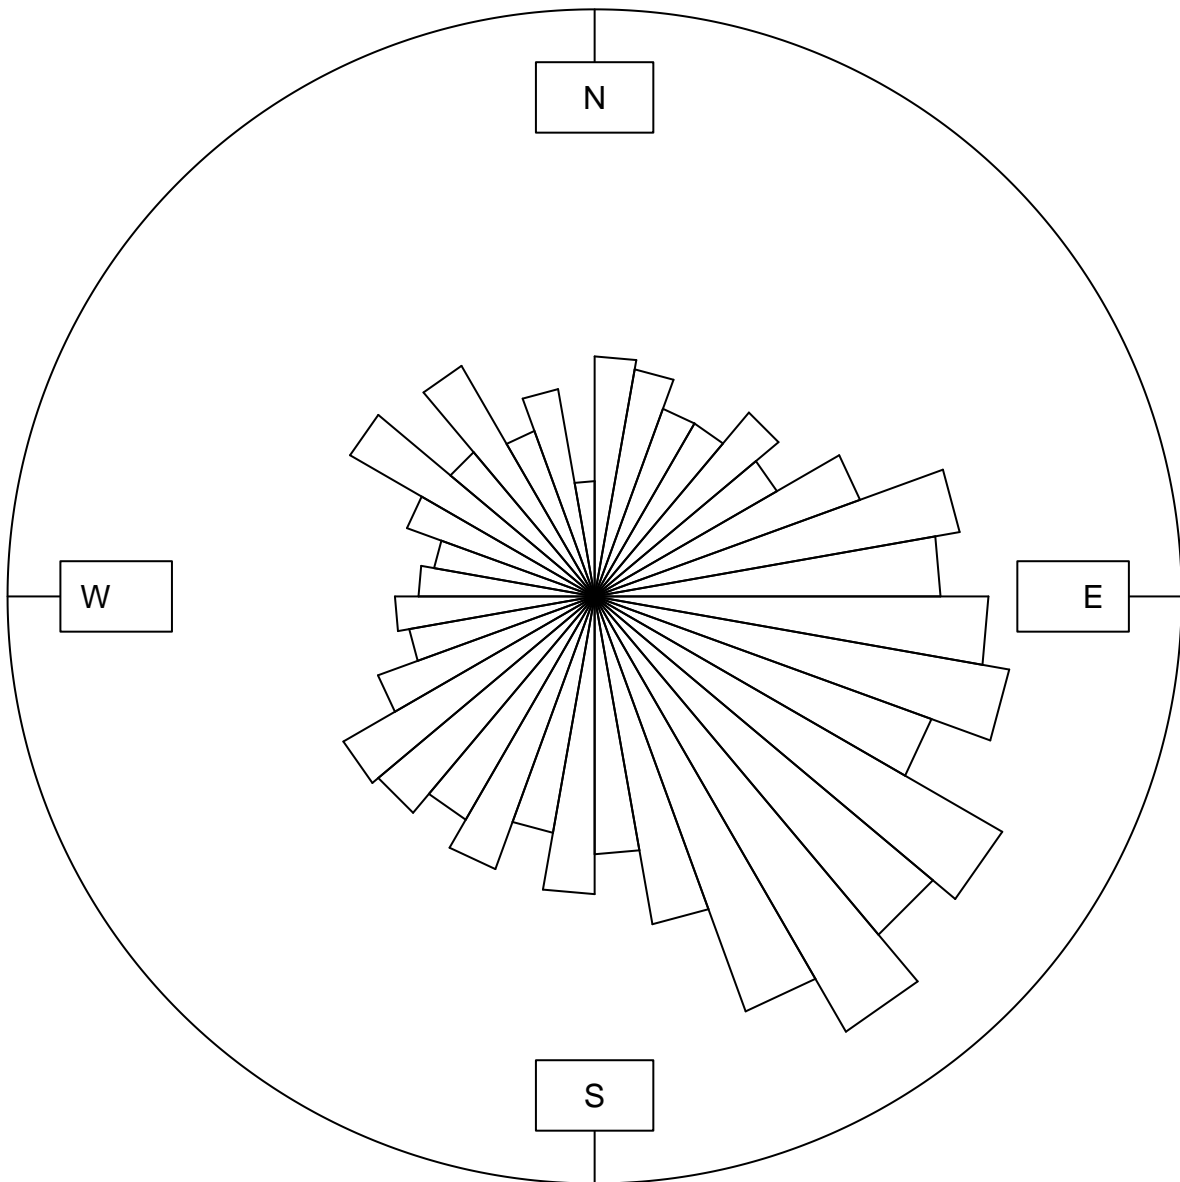

# bootstrap 666

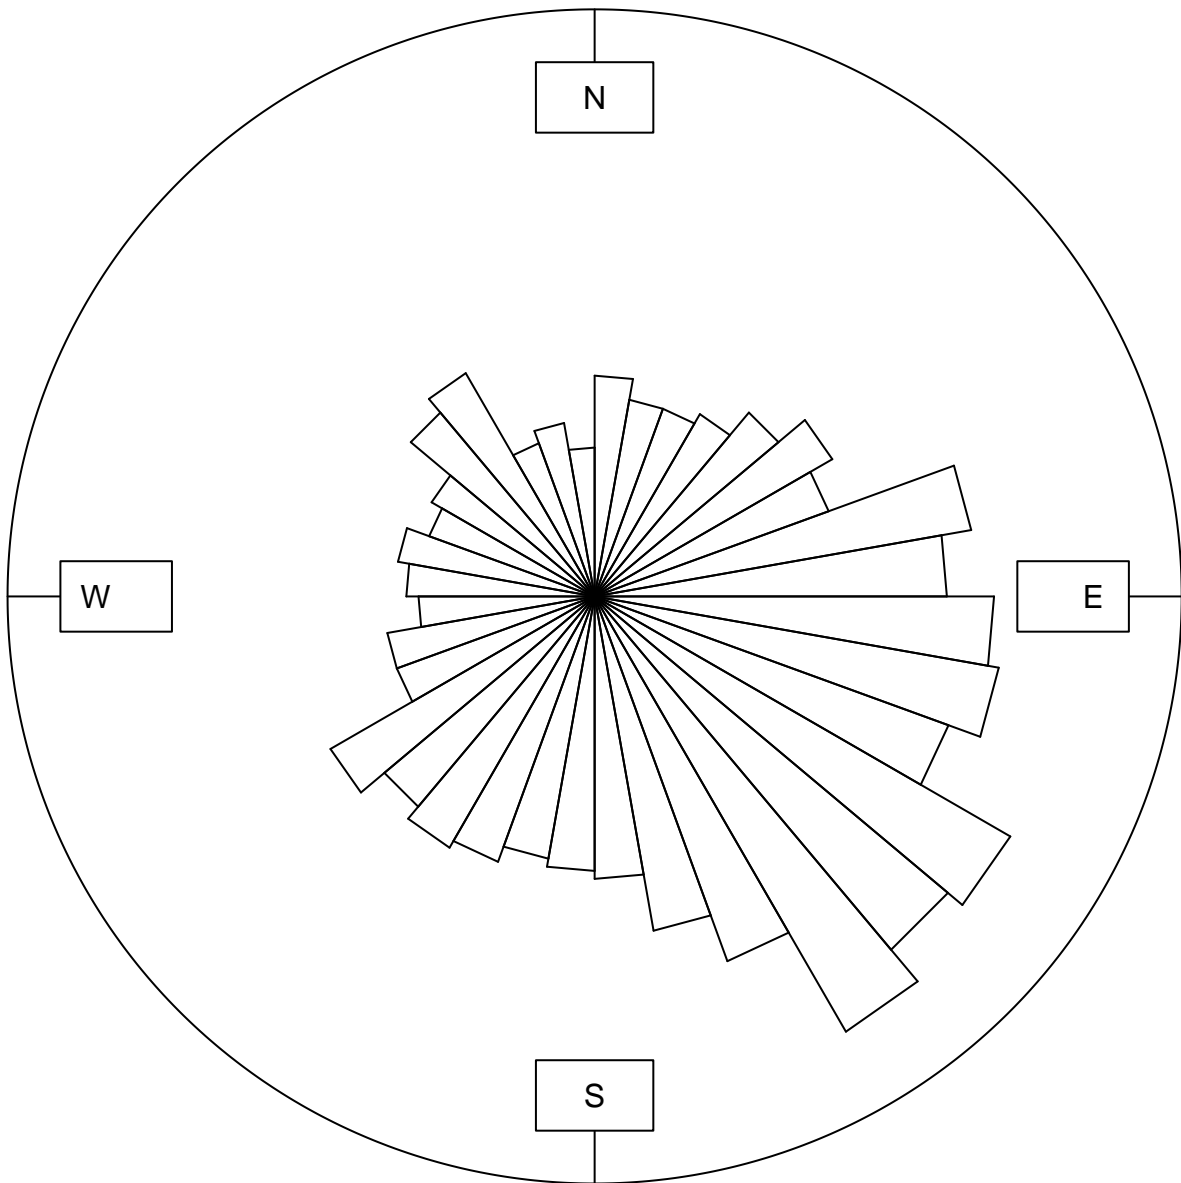

# bootstrap 667

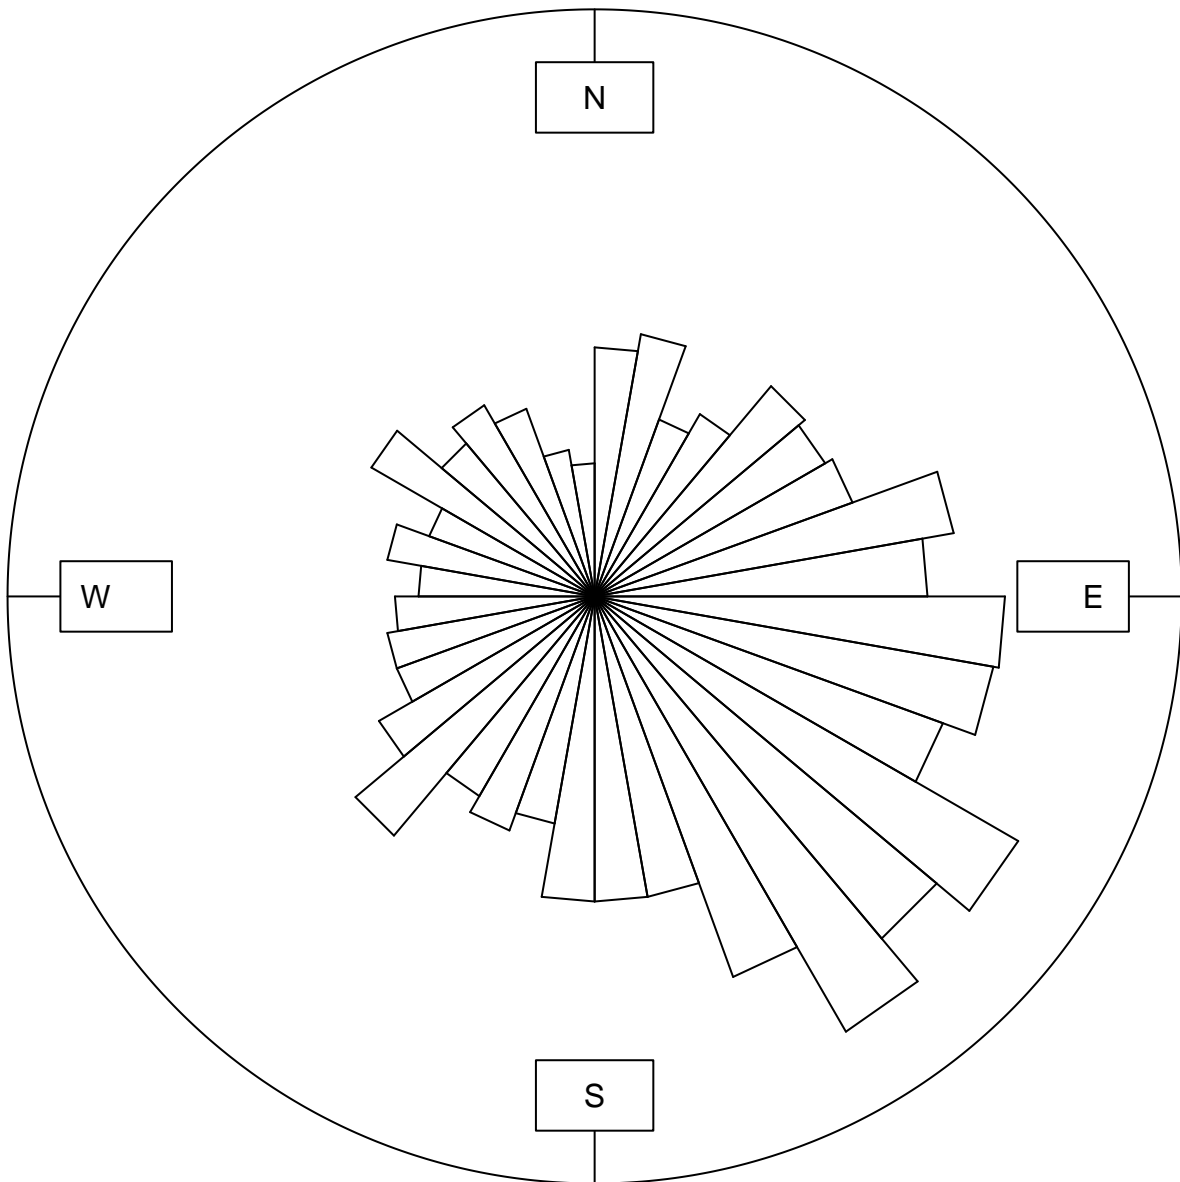

# bootstrap 668

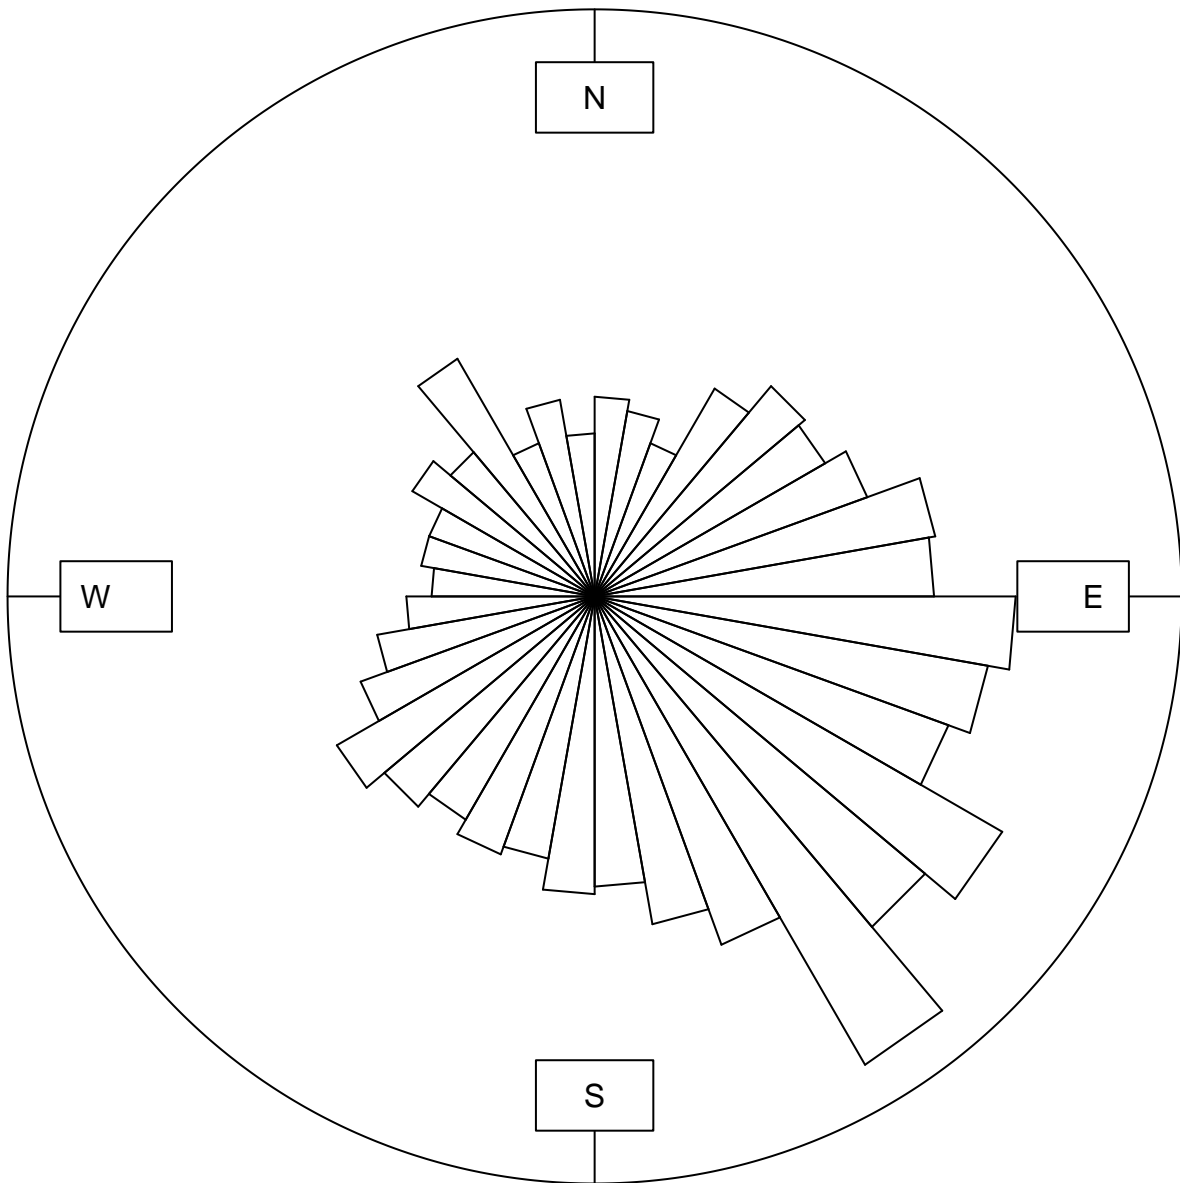

# bootstrap 669

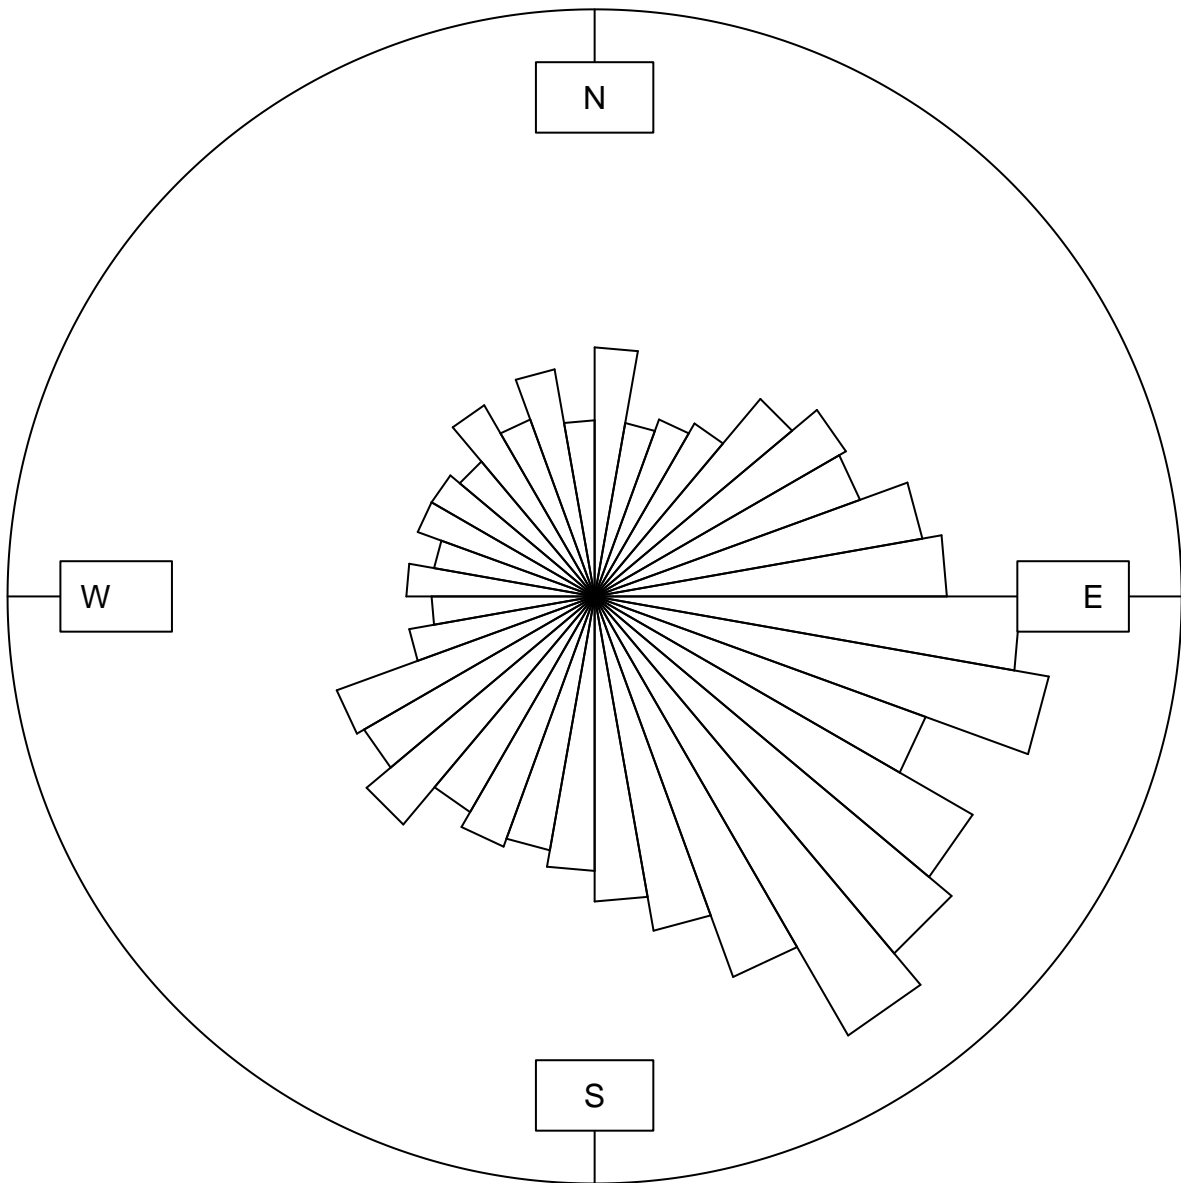

# bootstrap 670

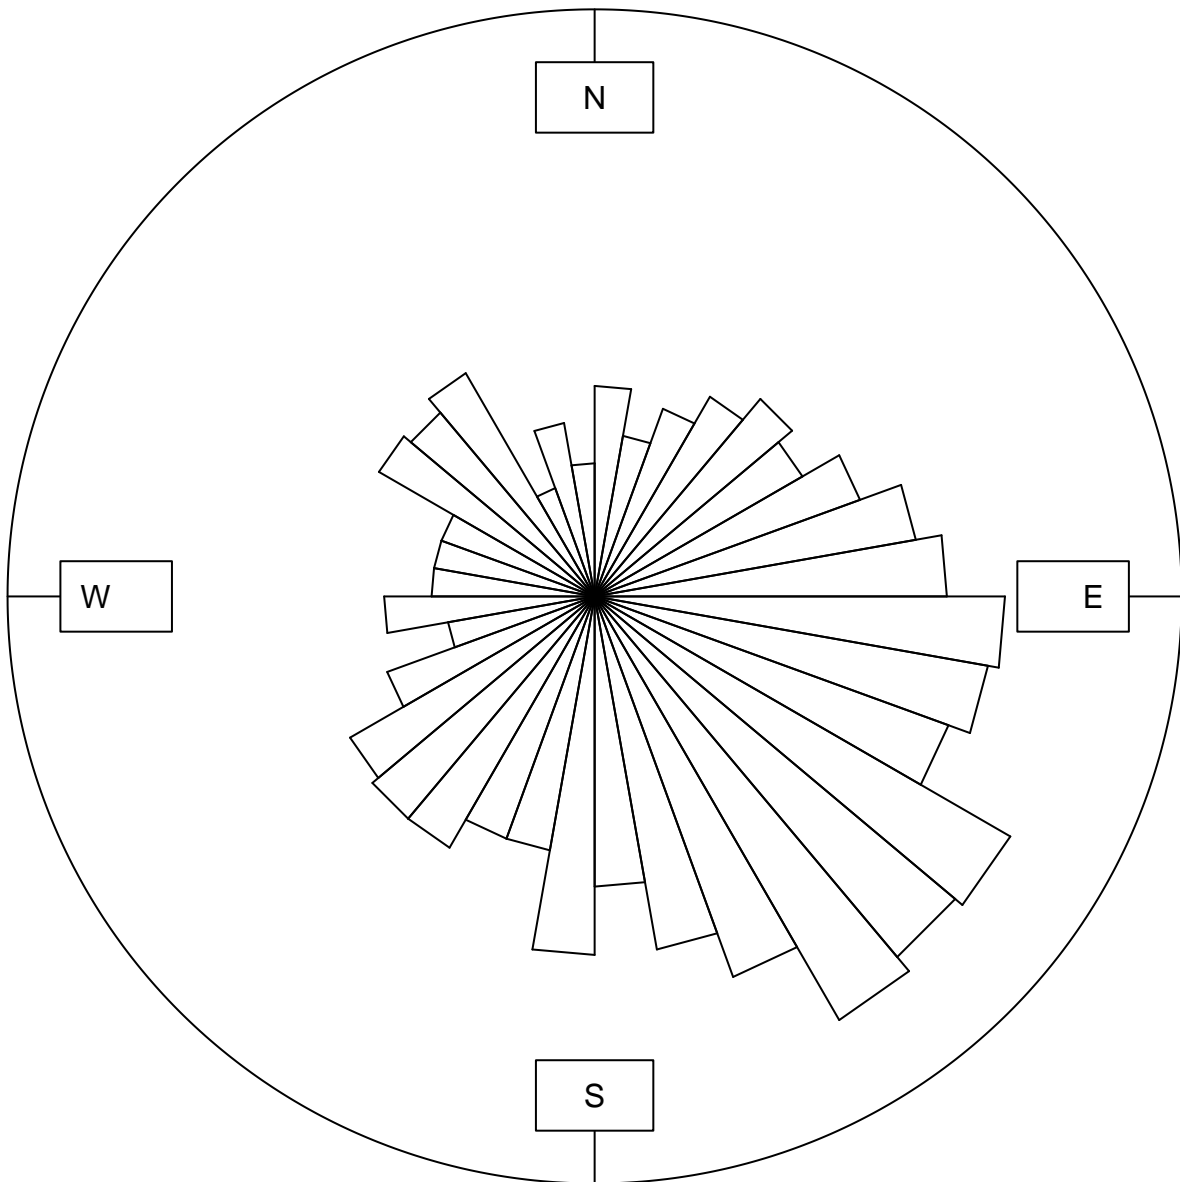

# bootstrap 671

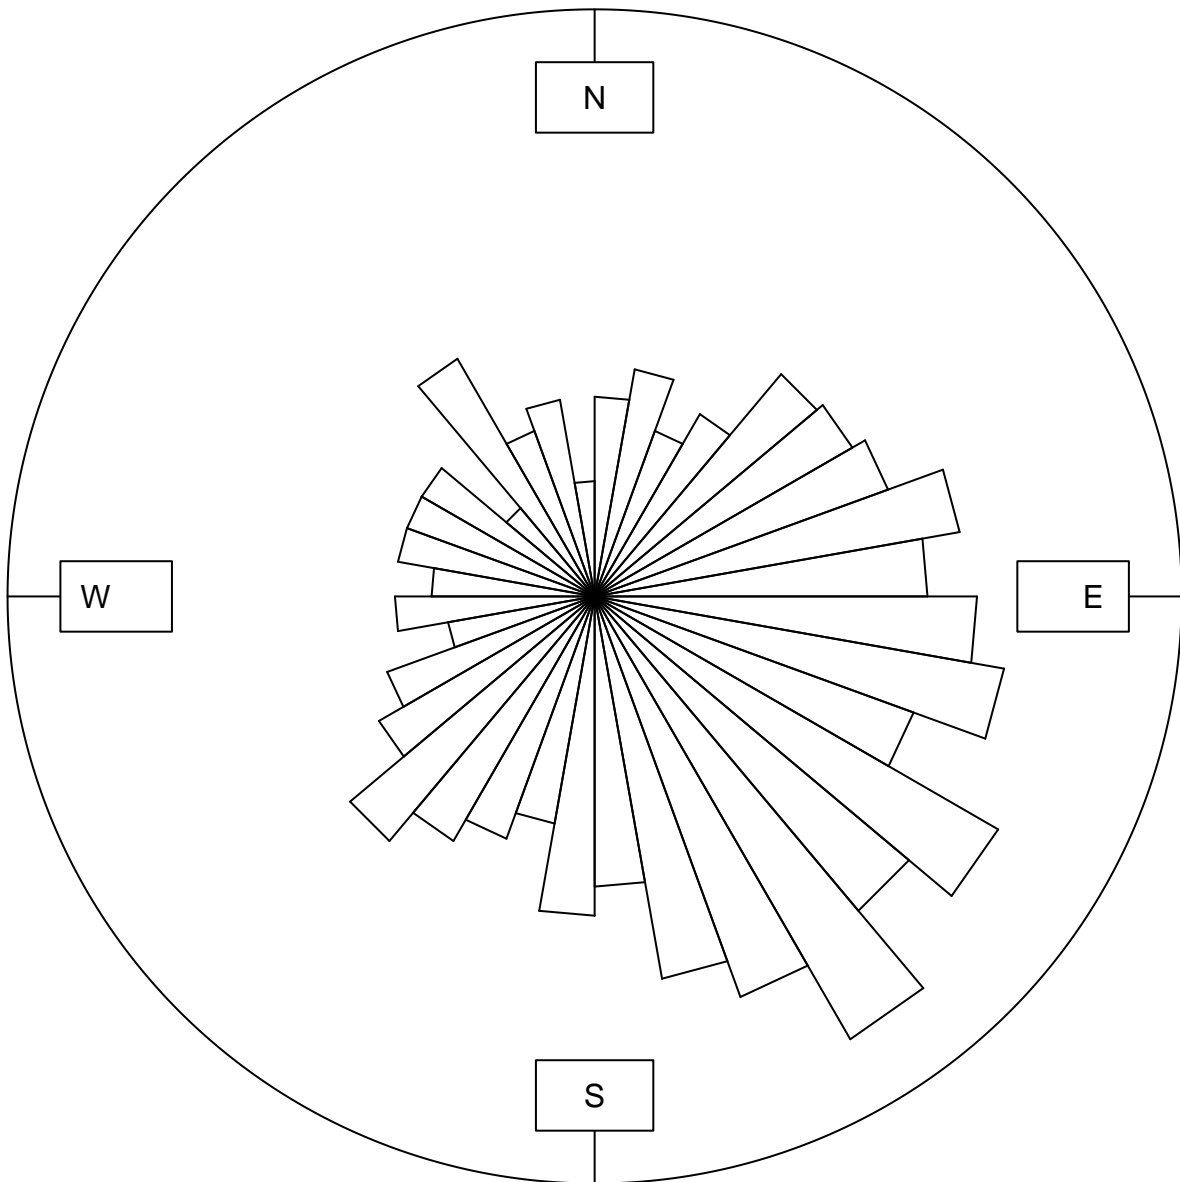

# bootstrap 672

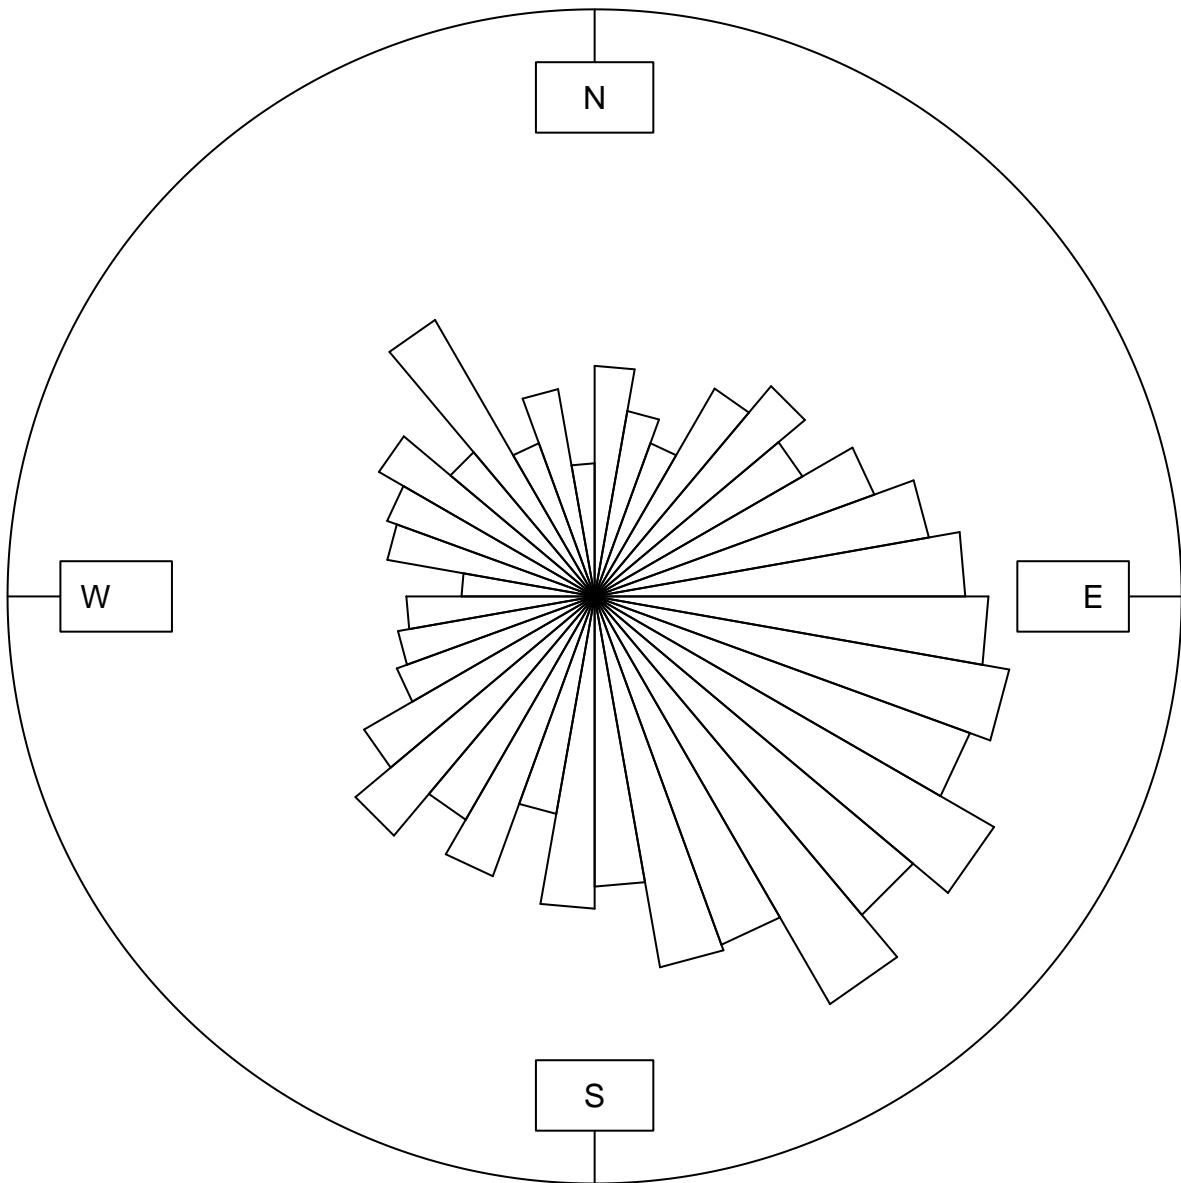



# bootstrap 673

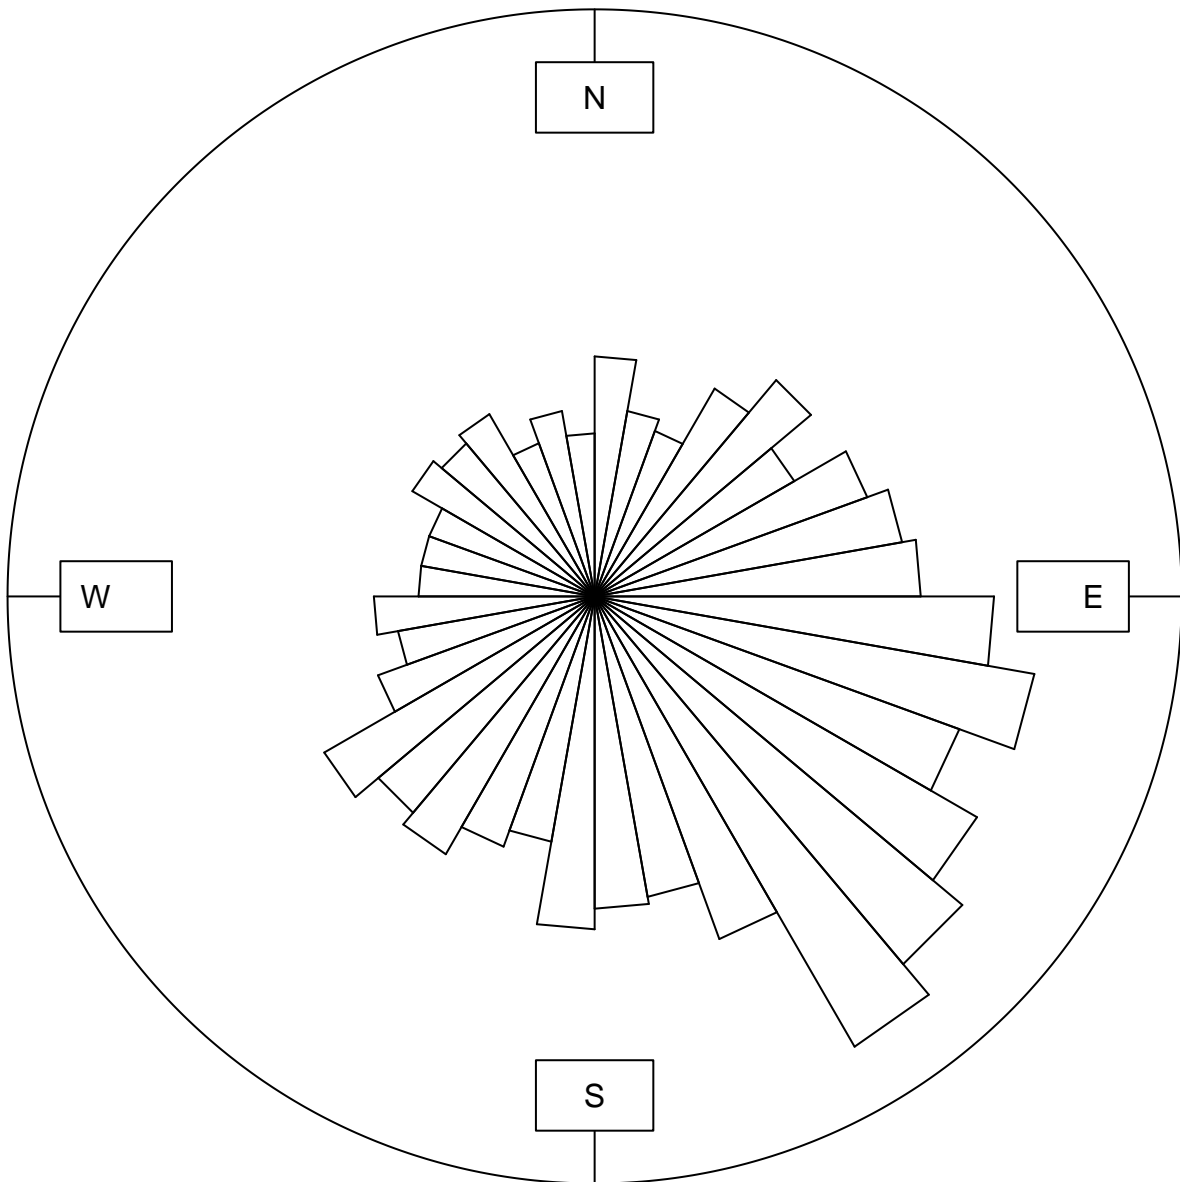

**bootstrap 674**

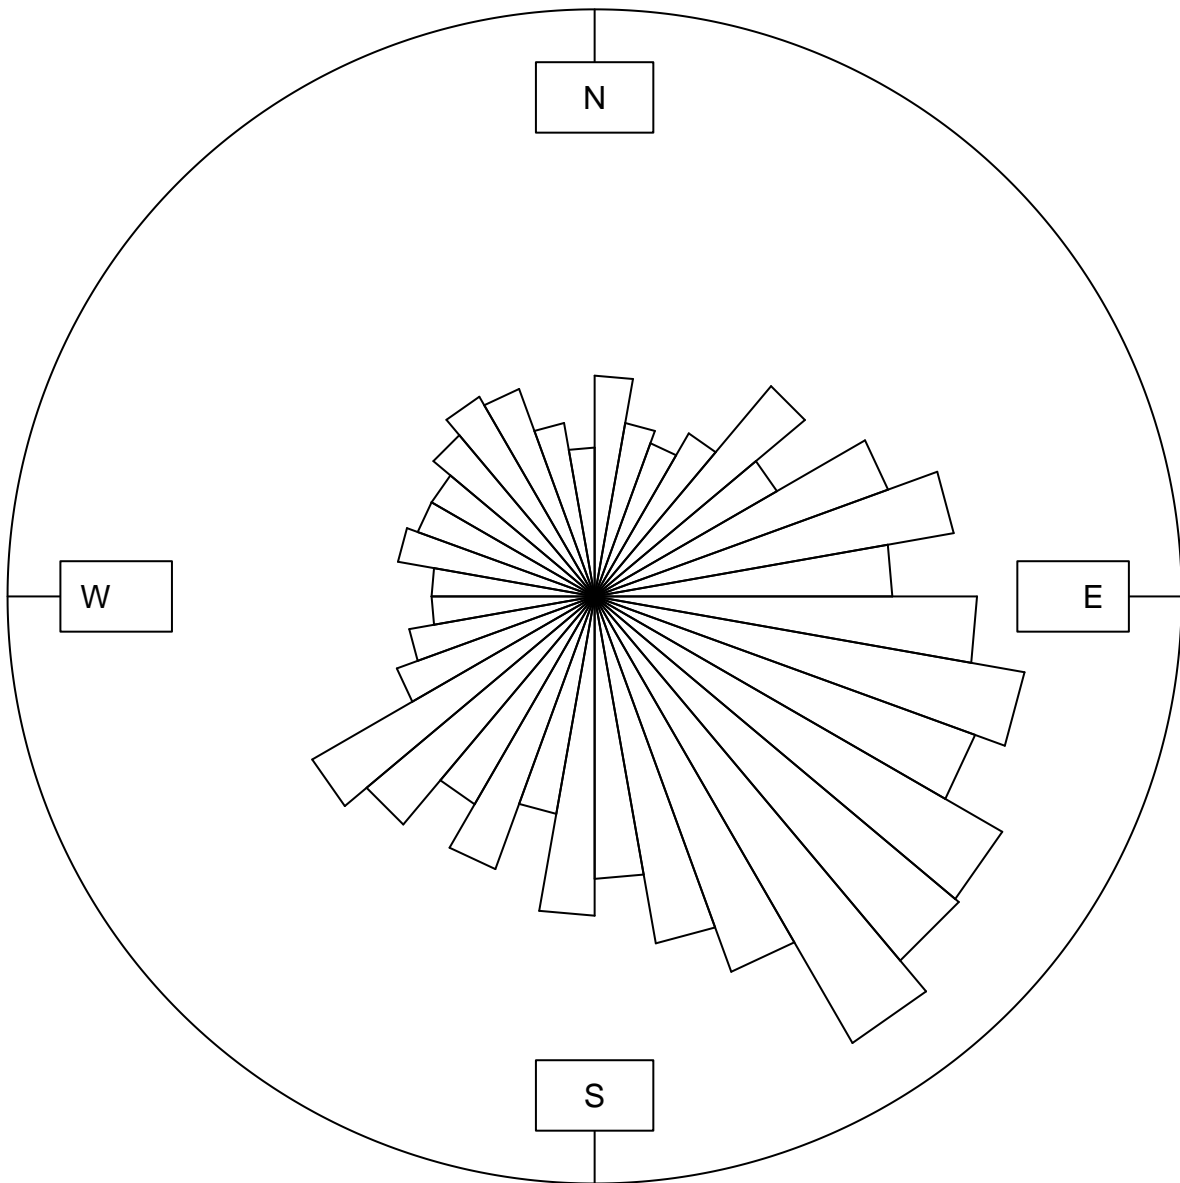

# bootstrap 675

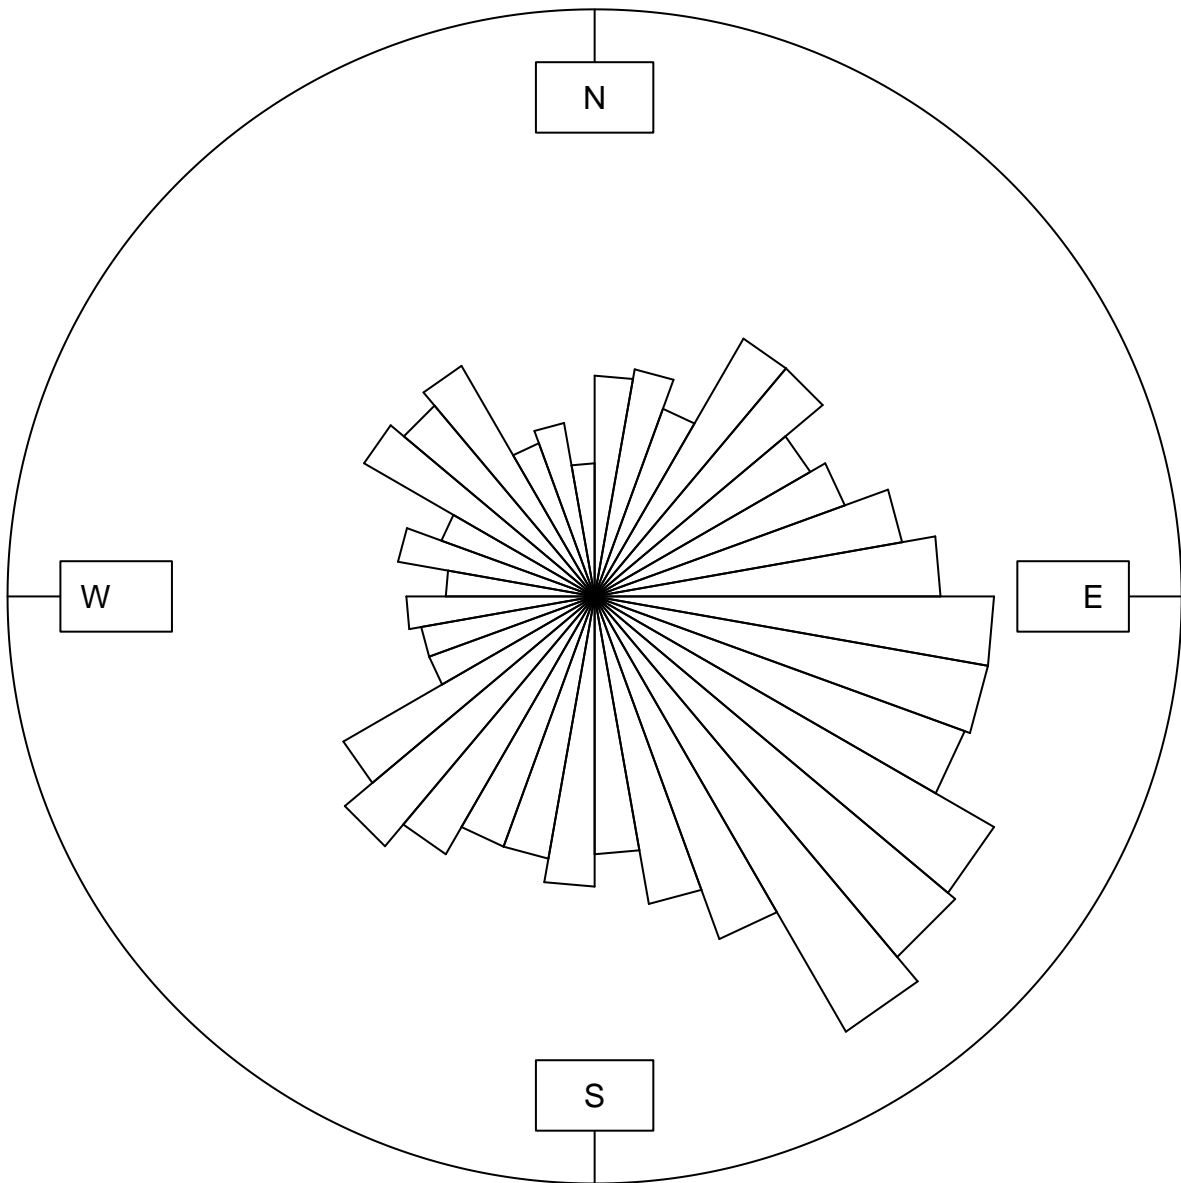

# bootstrap 676

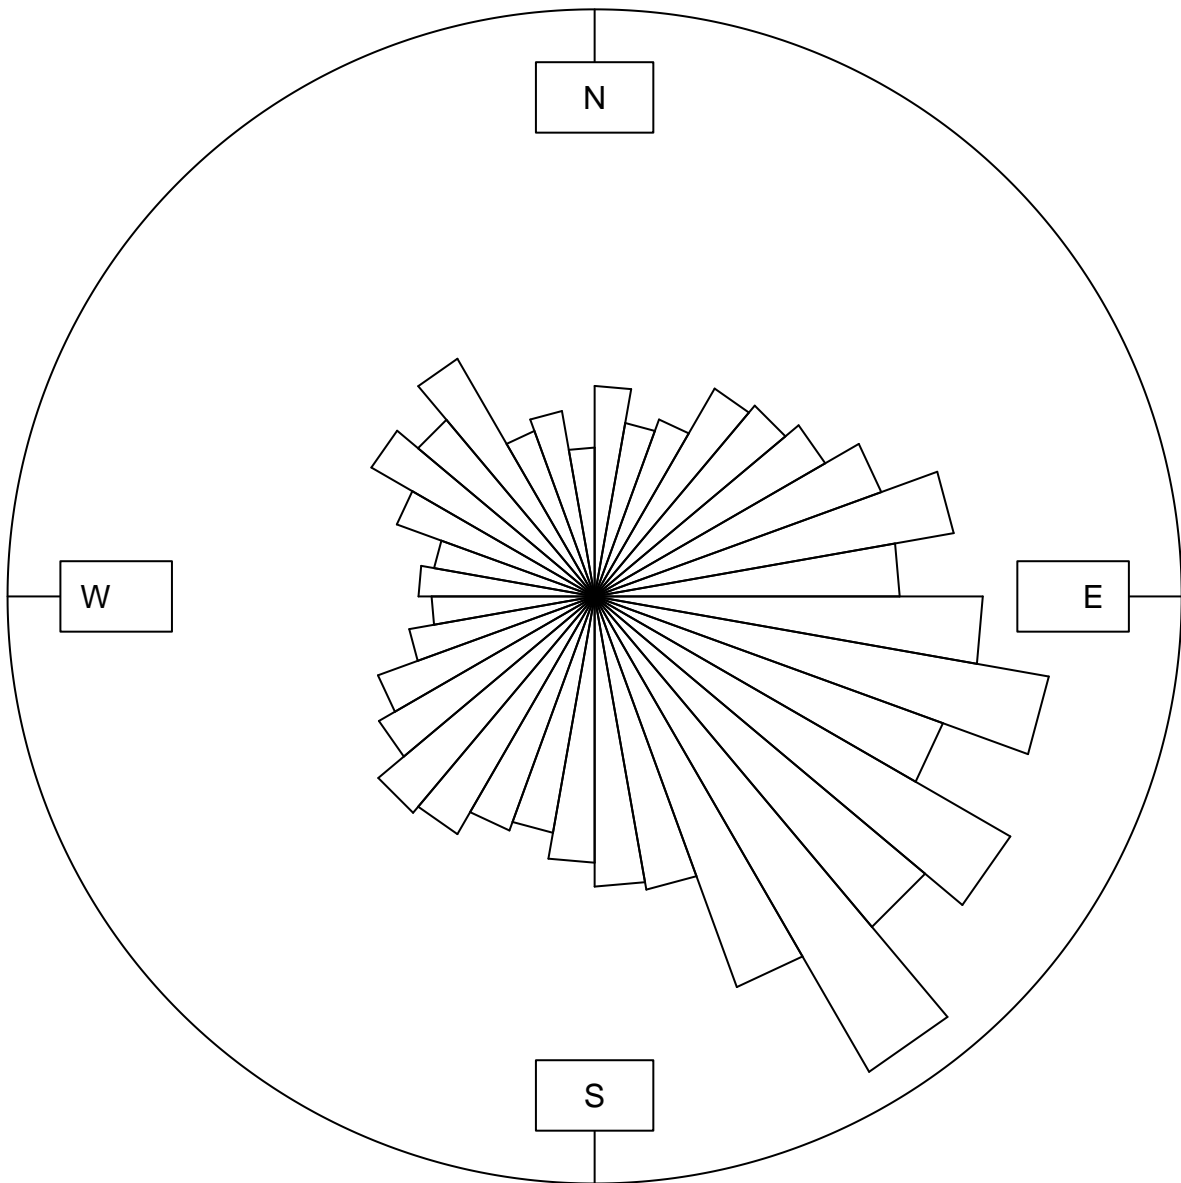

# bootstrap 677

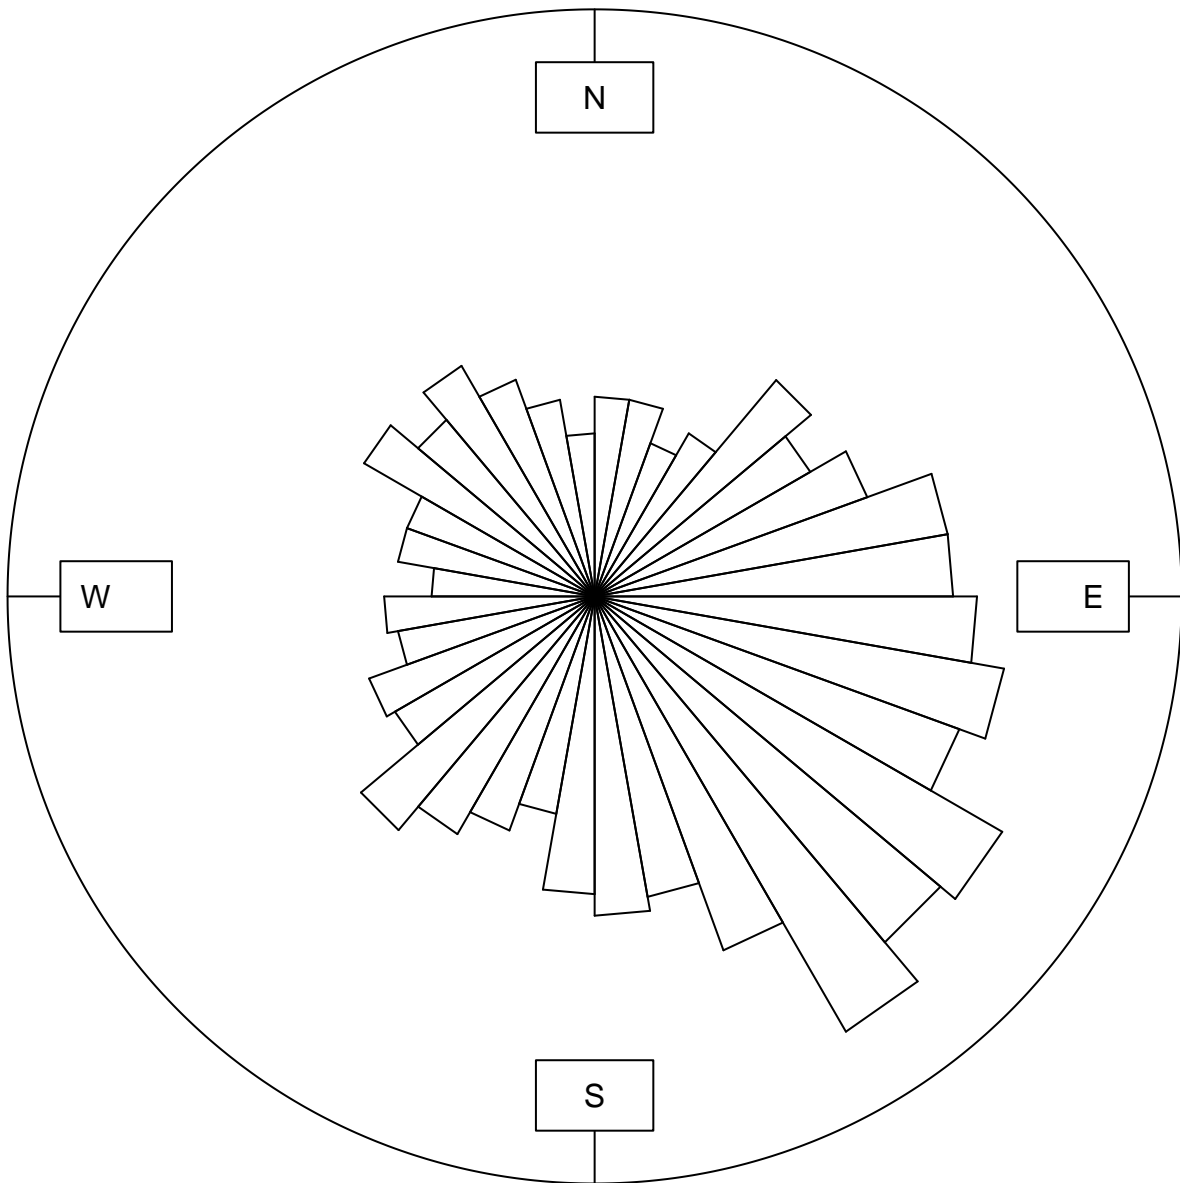

# bootstrap 678

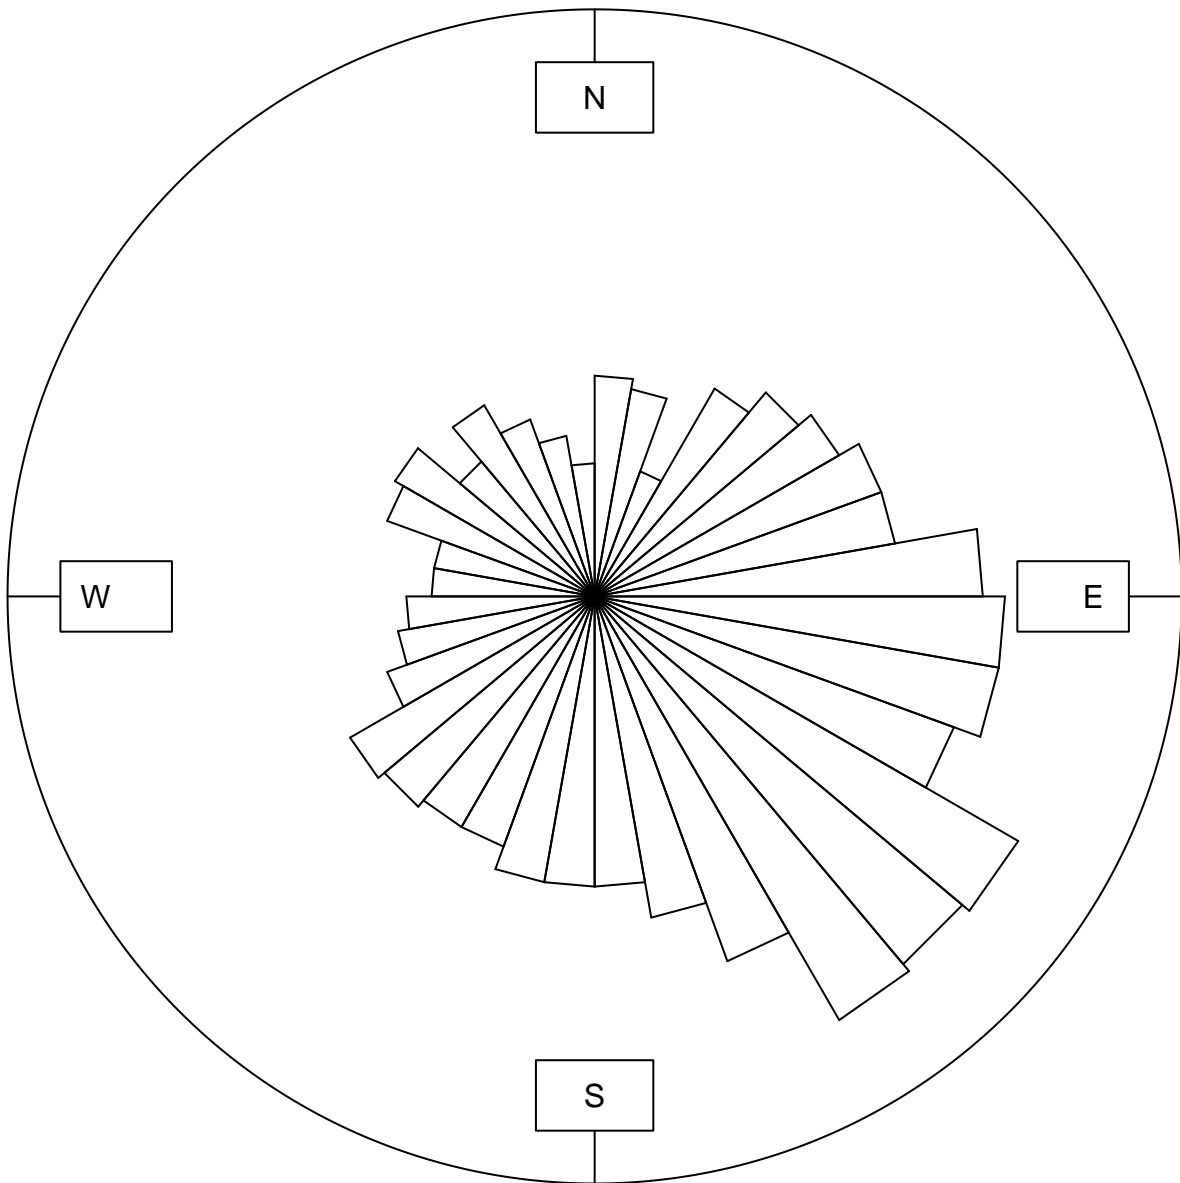

# bootstrap 679

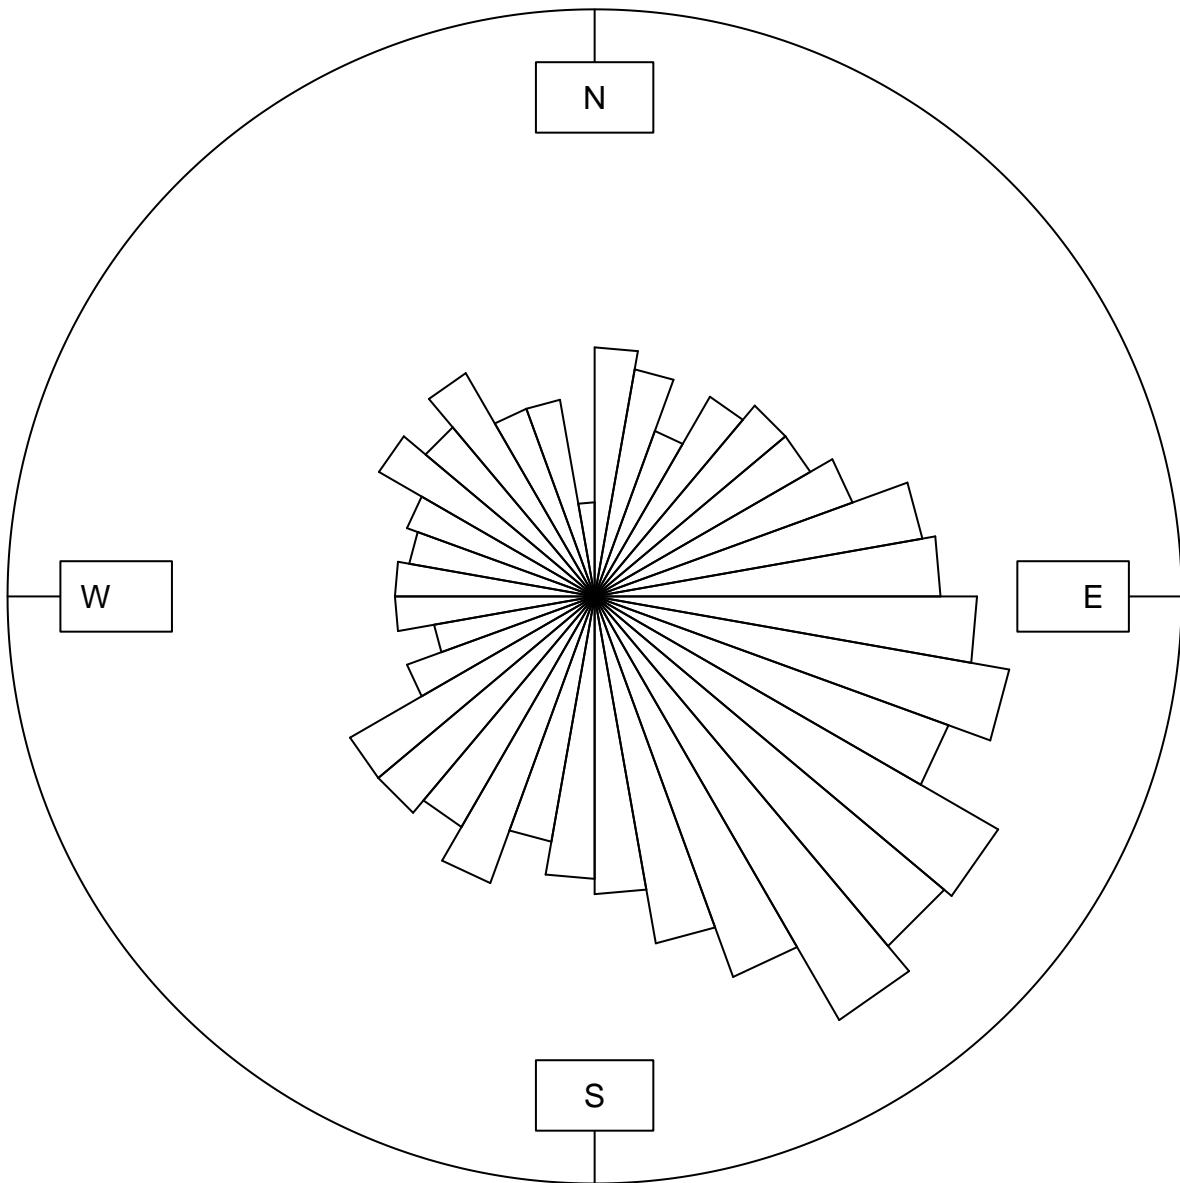

# bootstrap 680

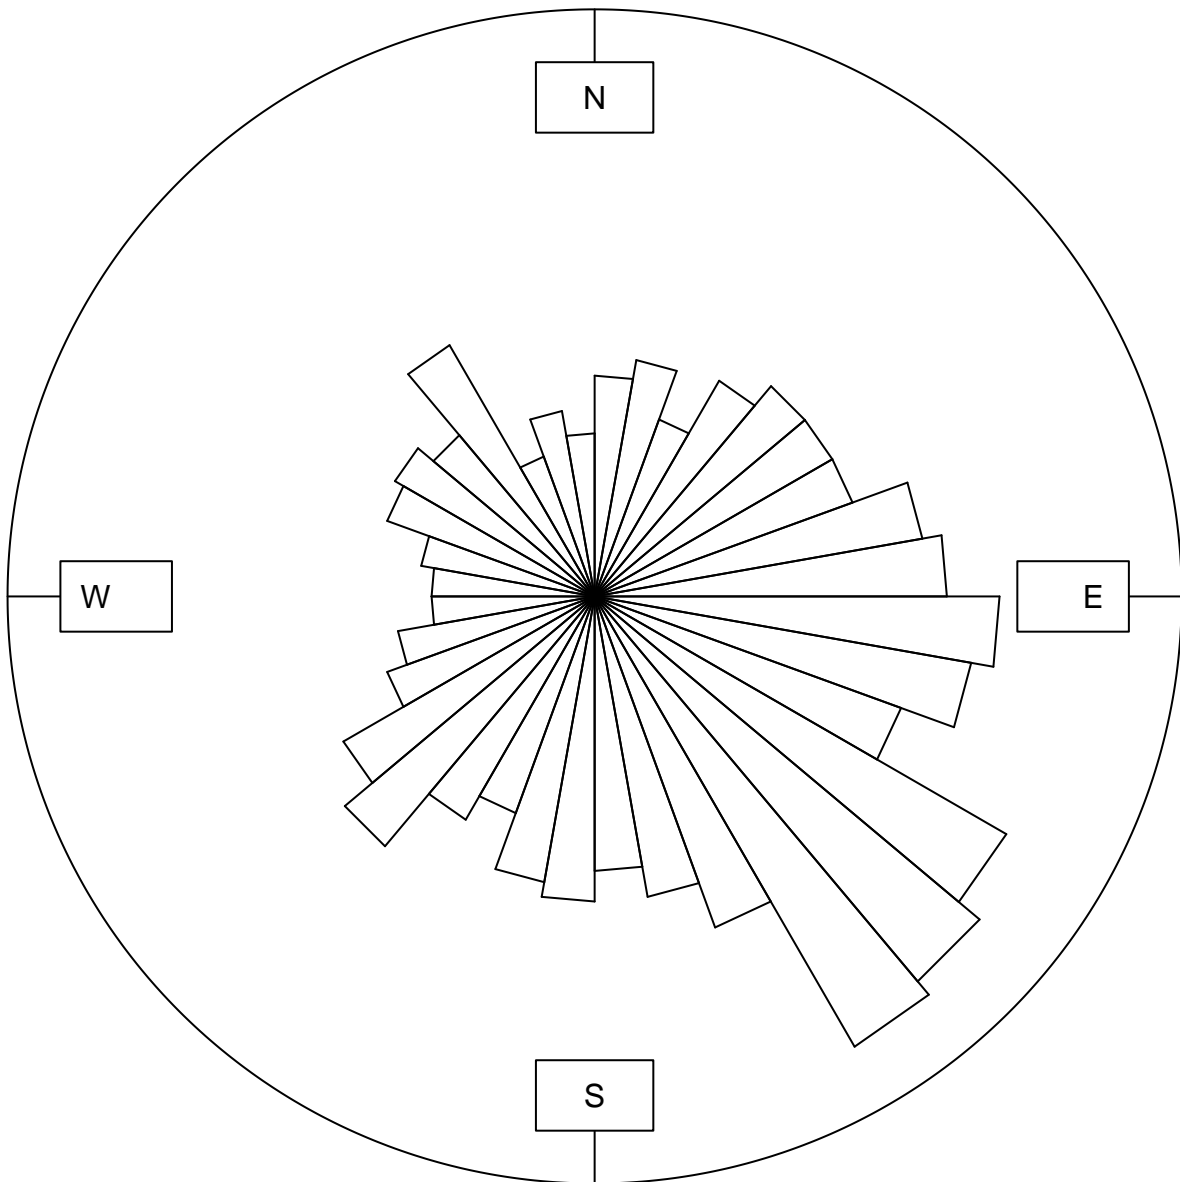



# bootstrap 681

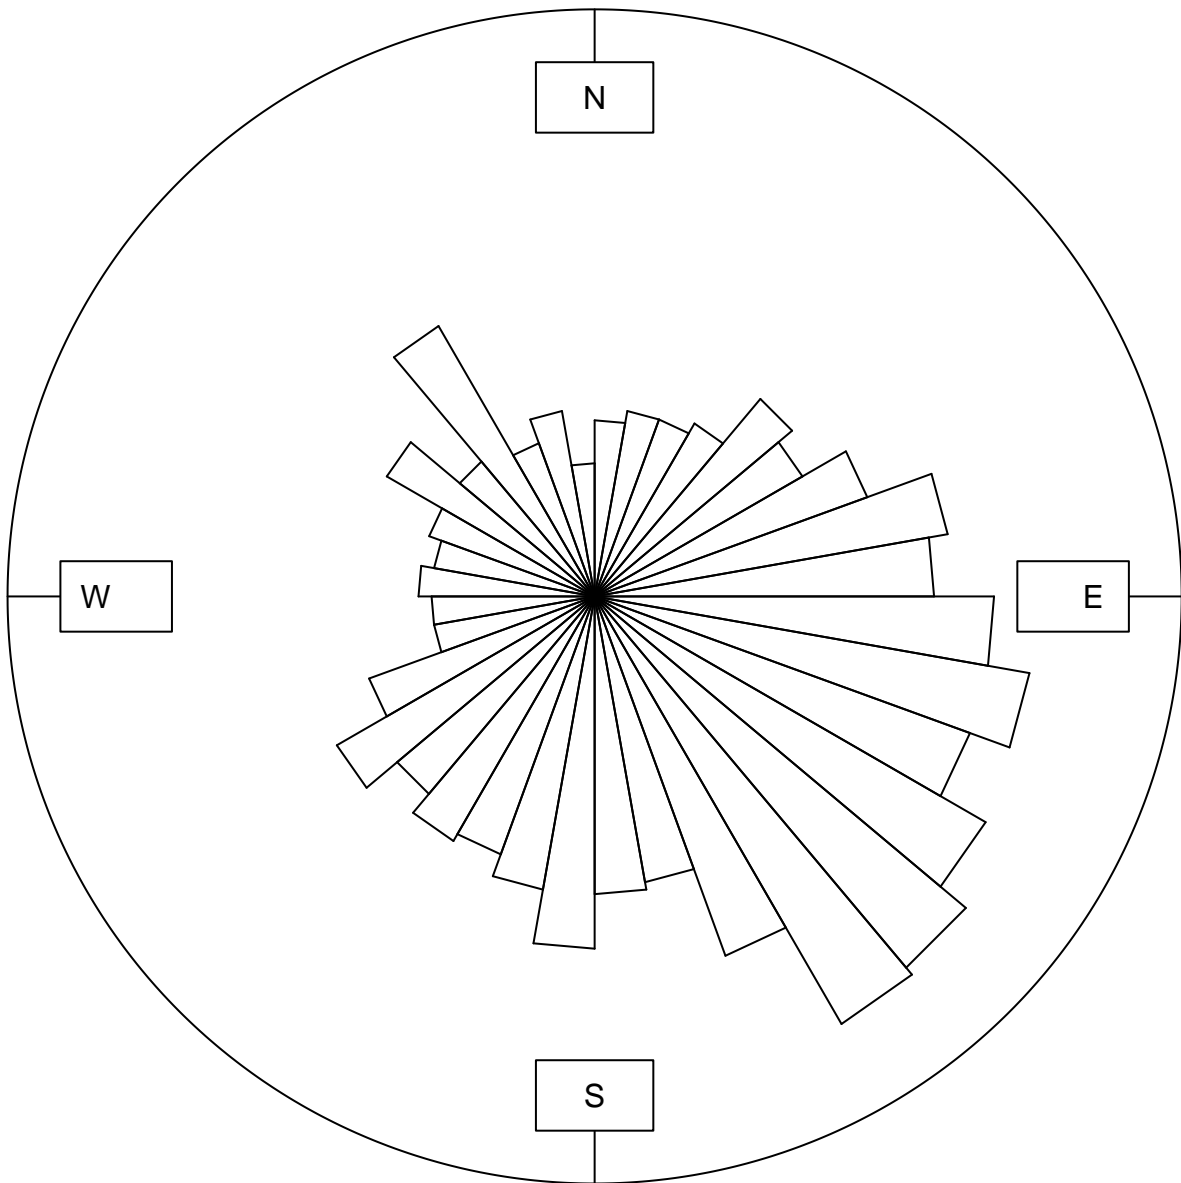

# bootstrap 682

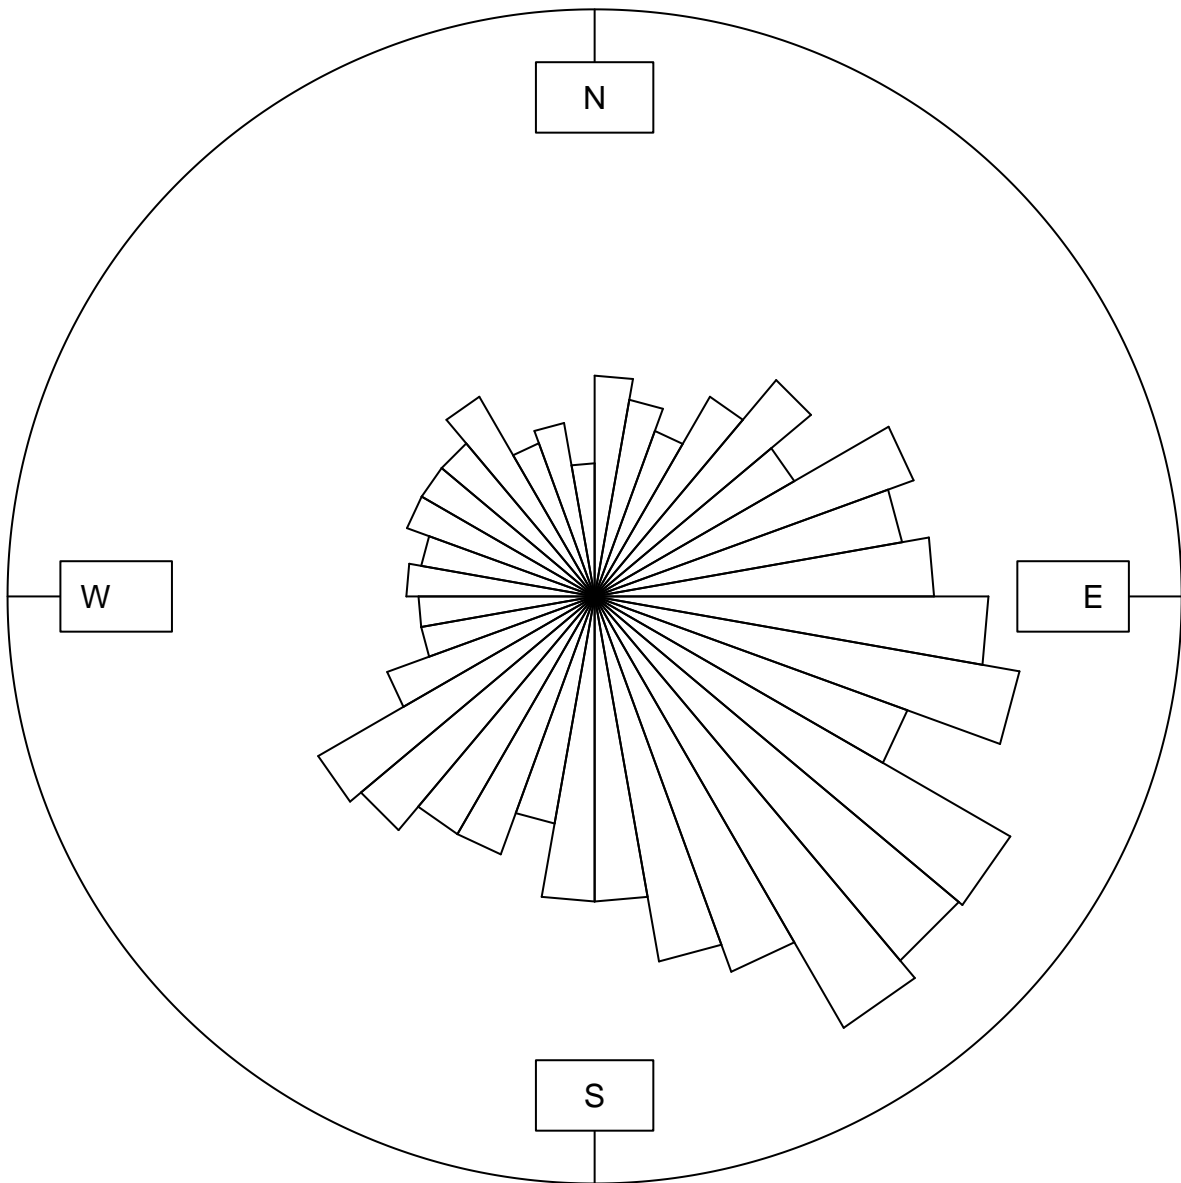

**bootstrap 683**

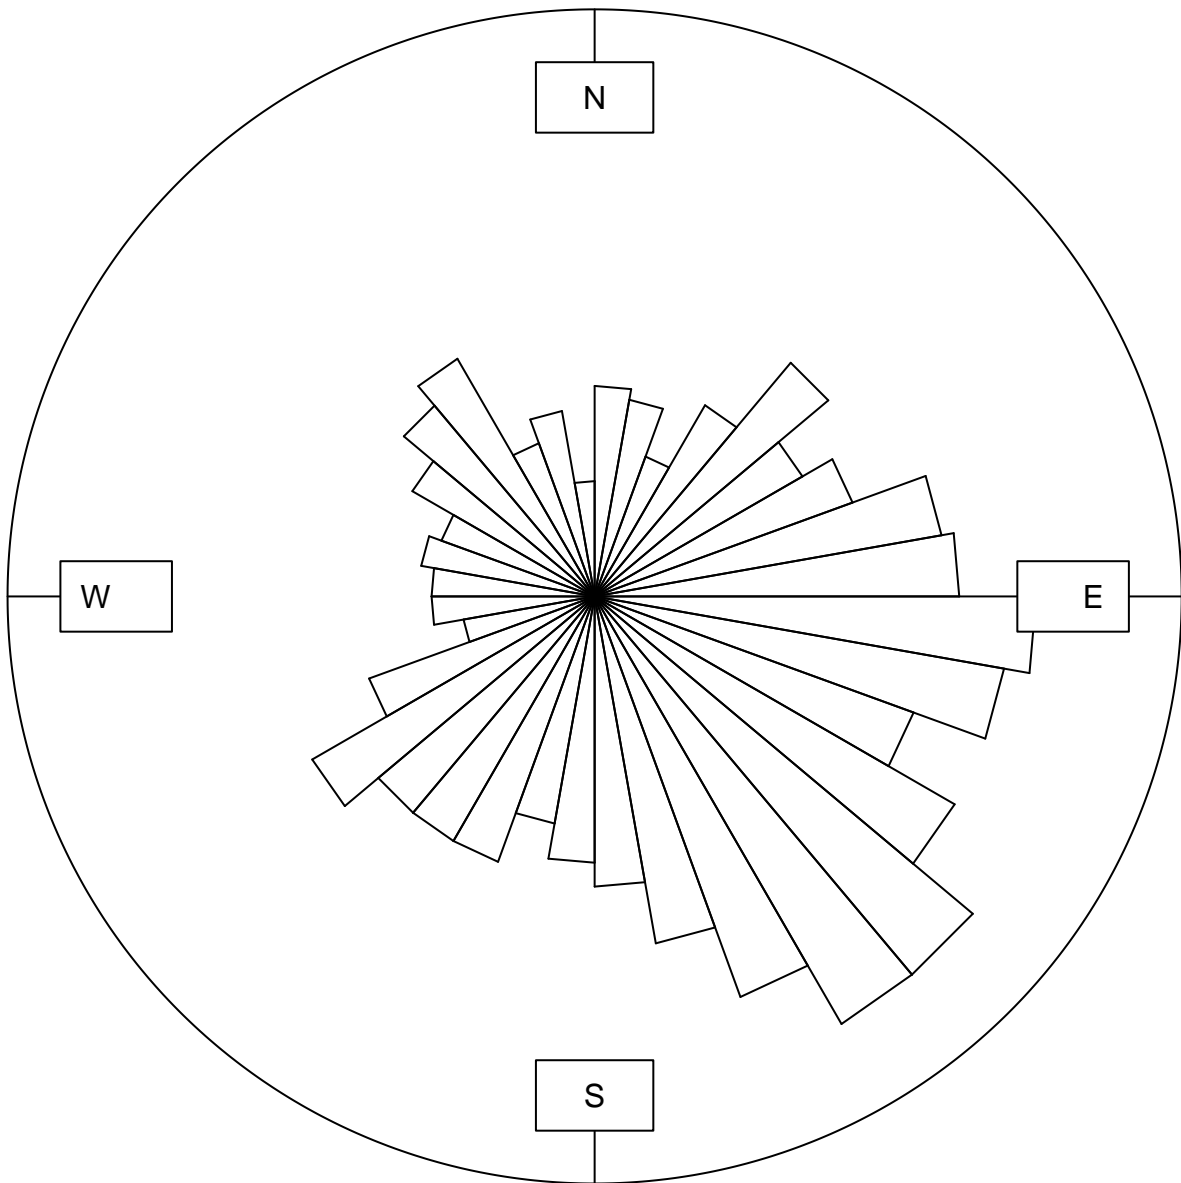

# bootstrap 684

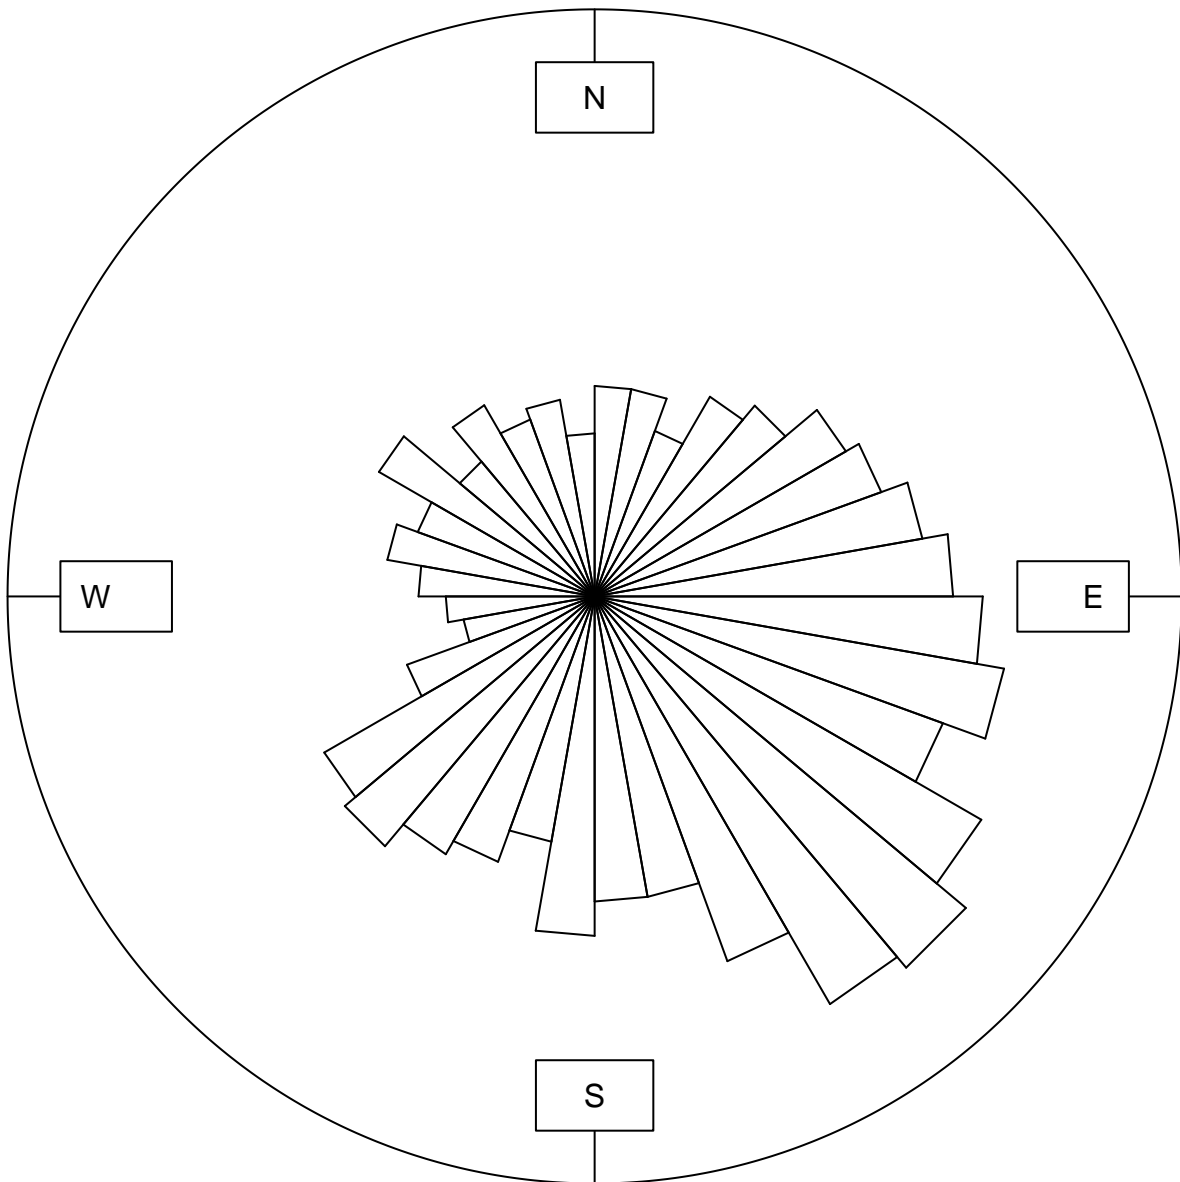

# bootstrap 685

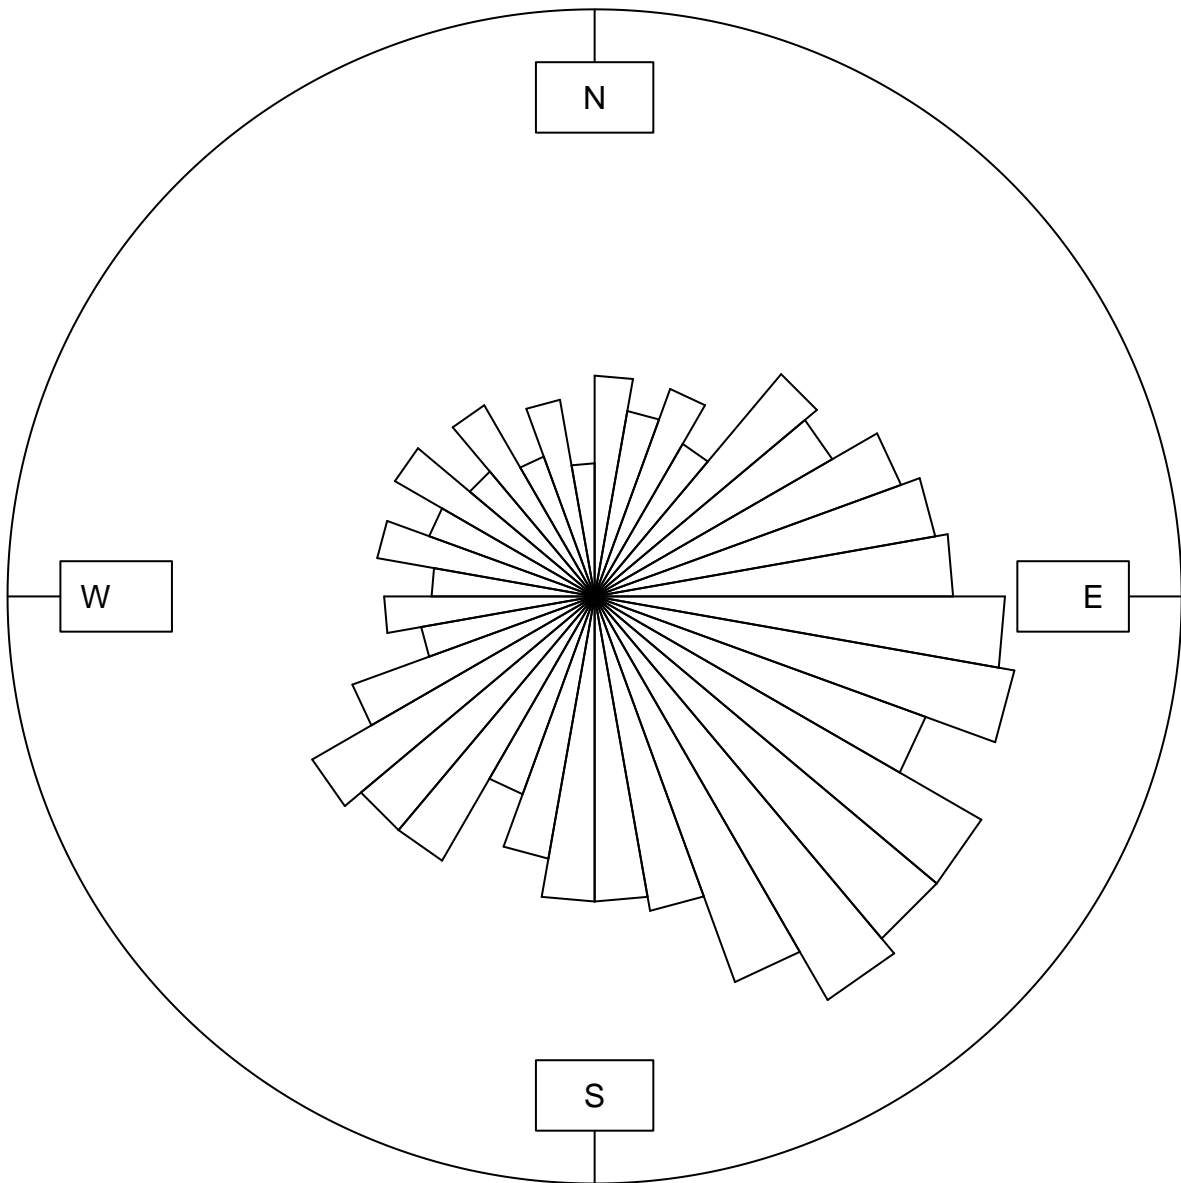

# bootstrap 686

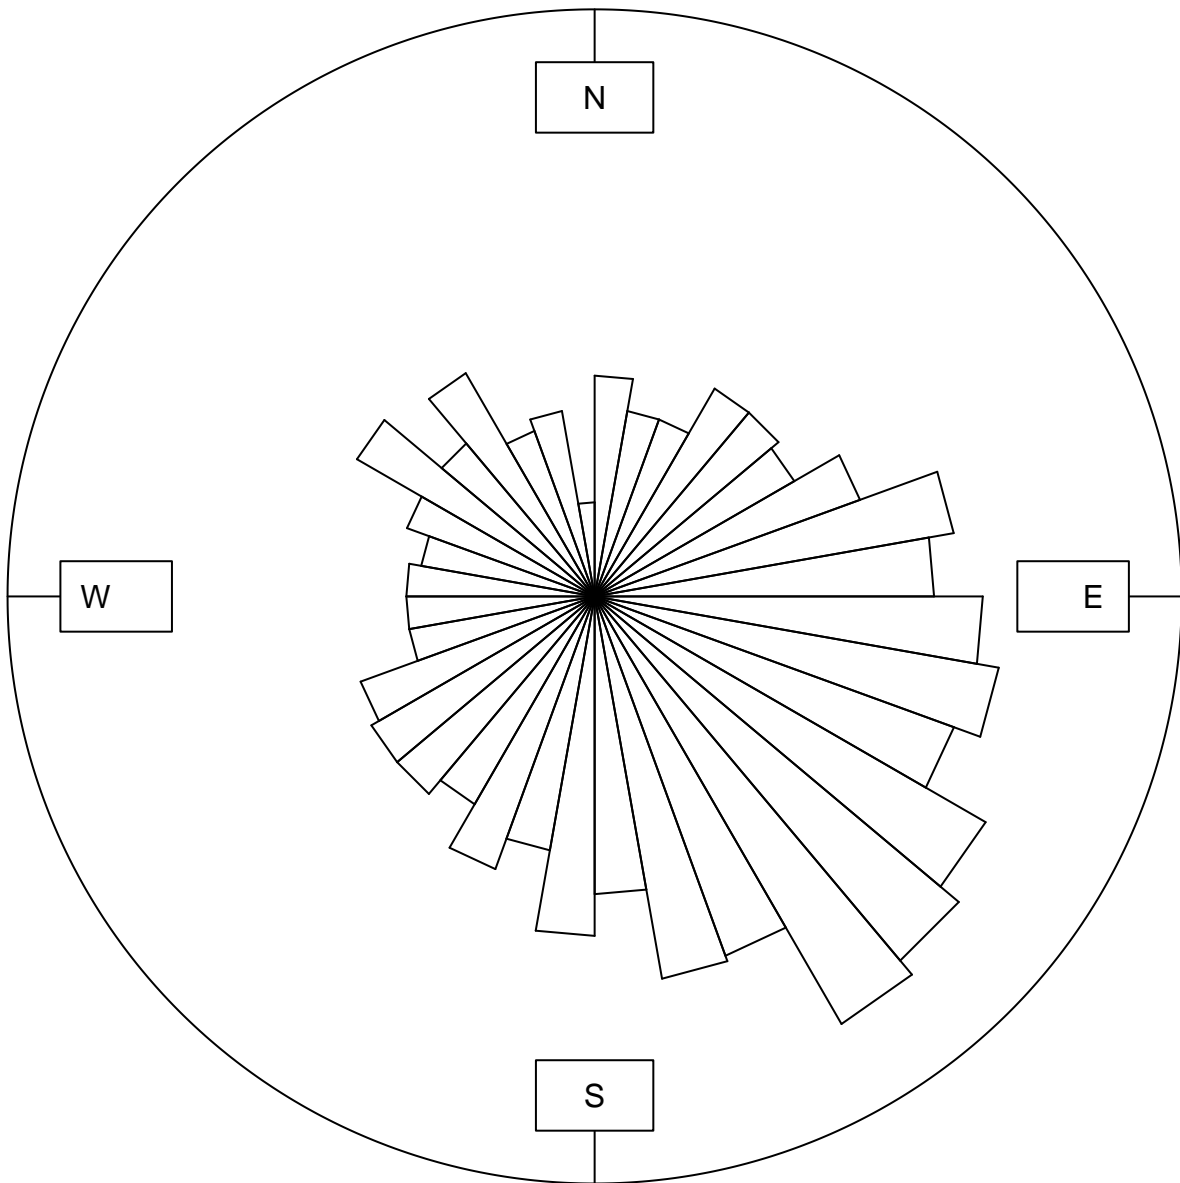

# bootstrap 687

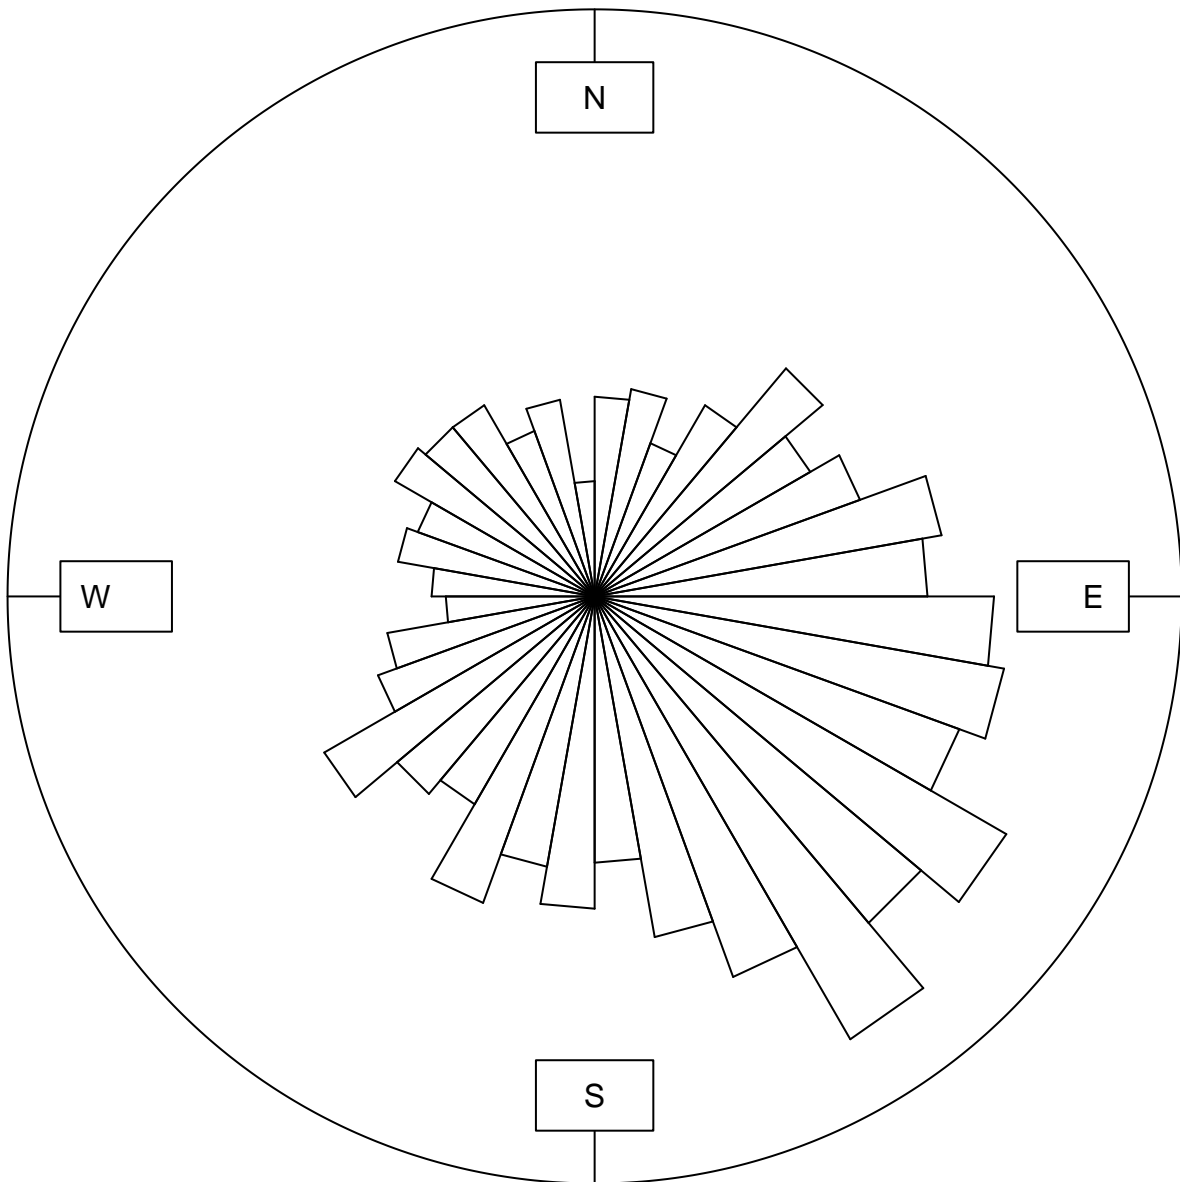

# bootstrap 688

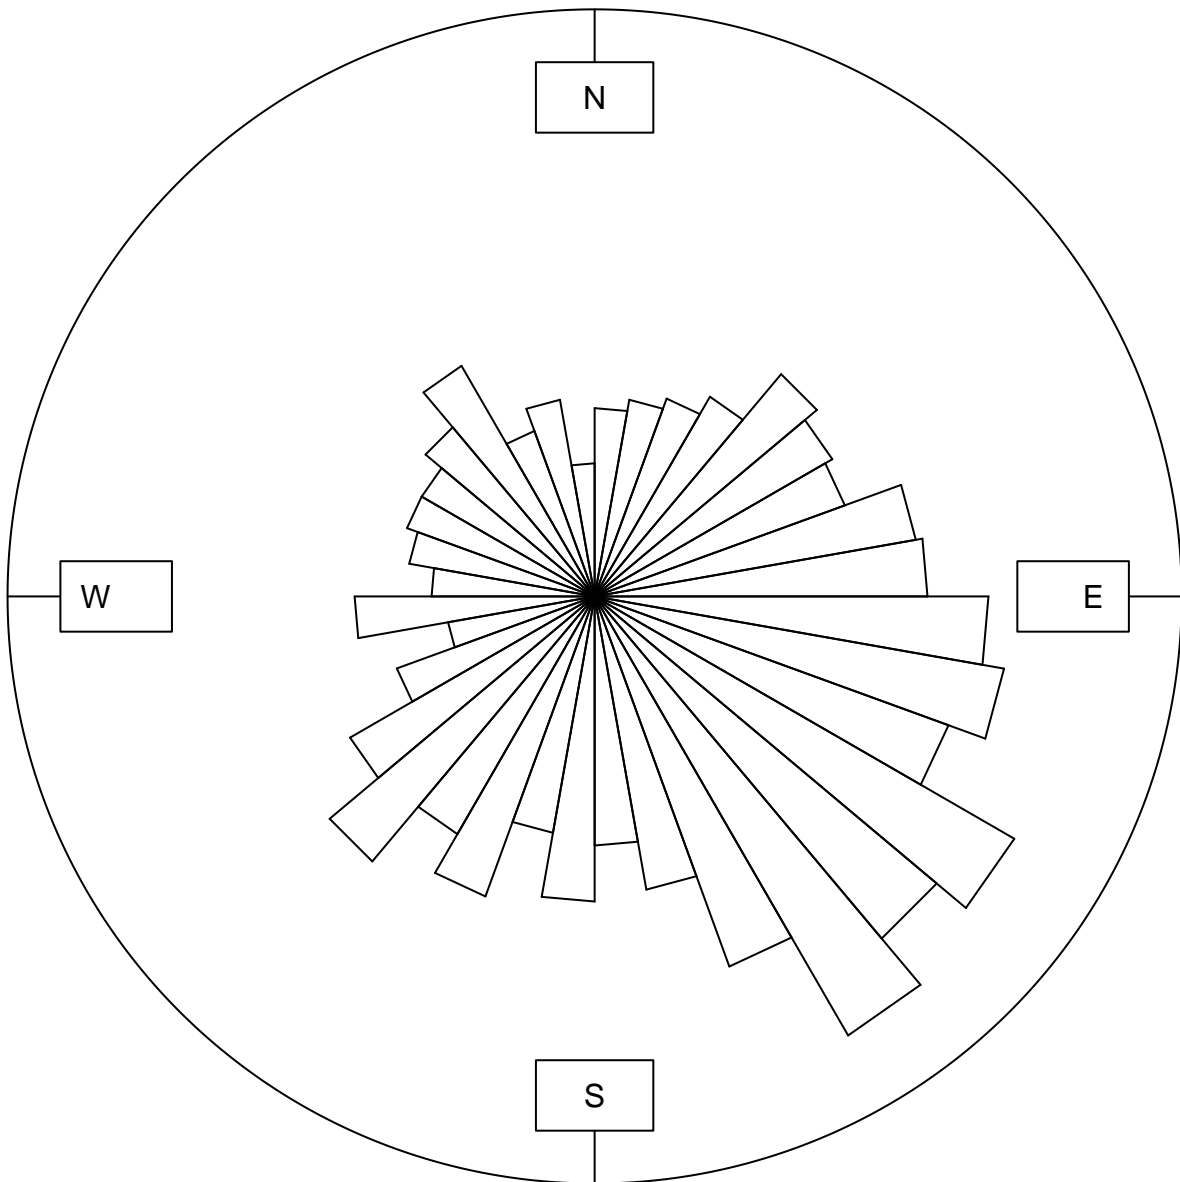



# bootstrap 689

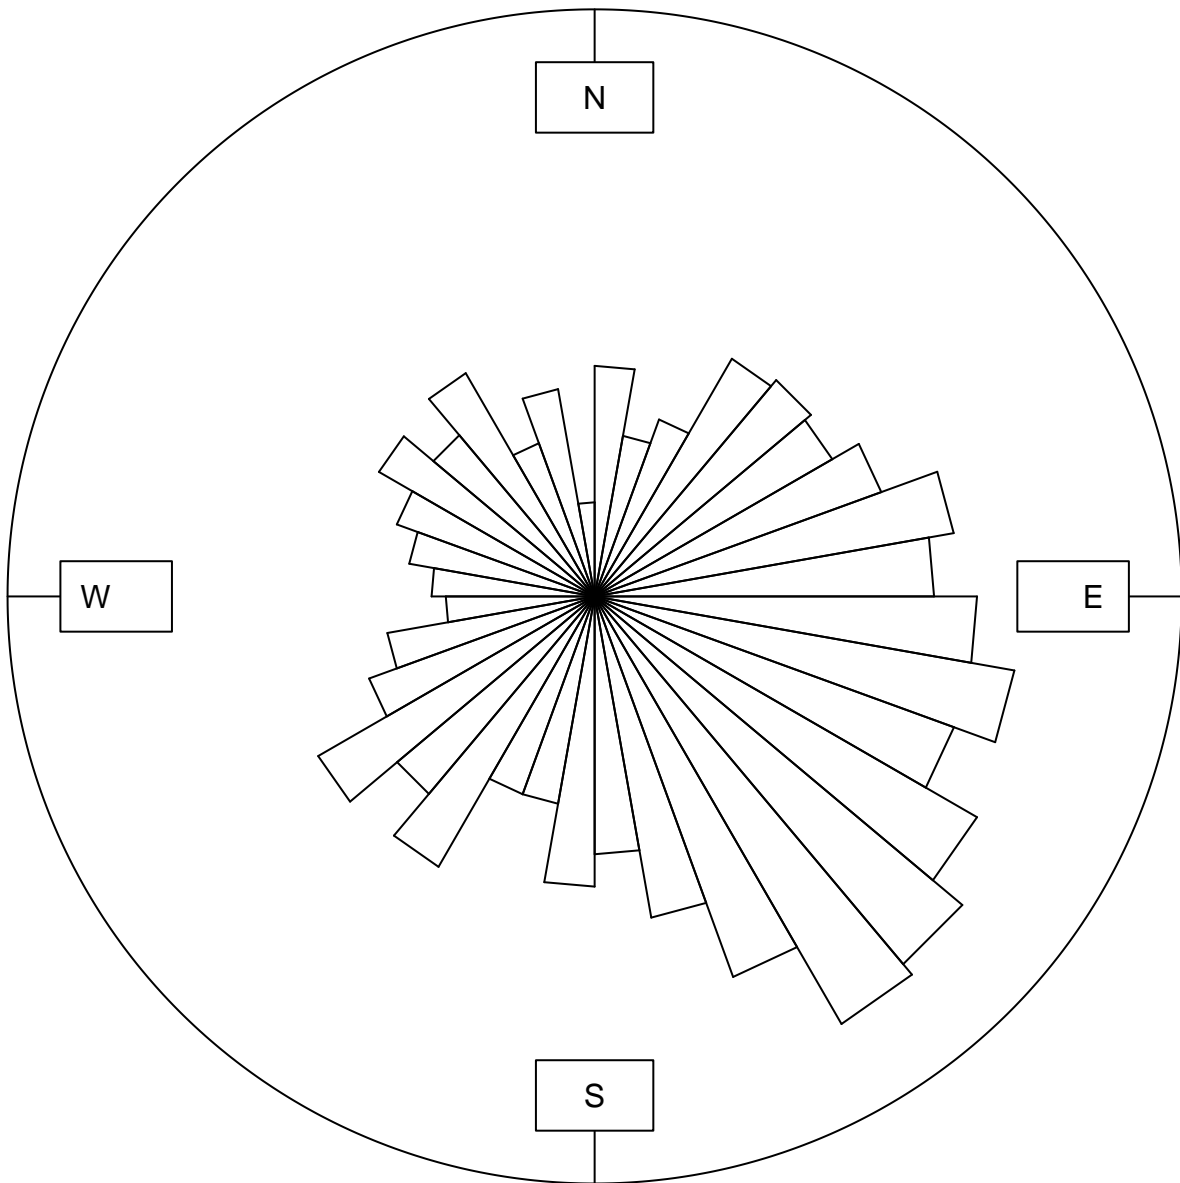

# bootstrap 690

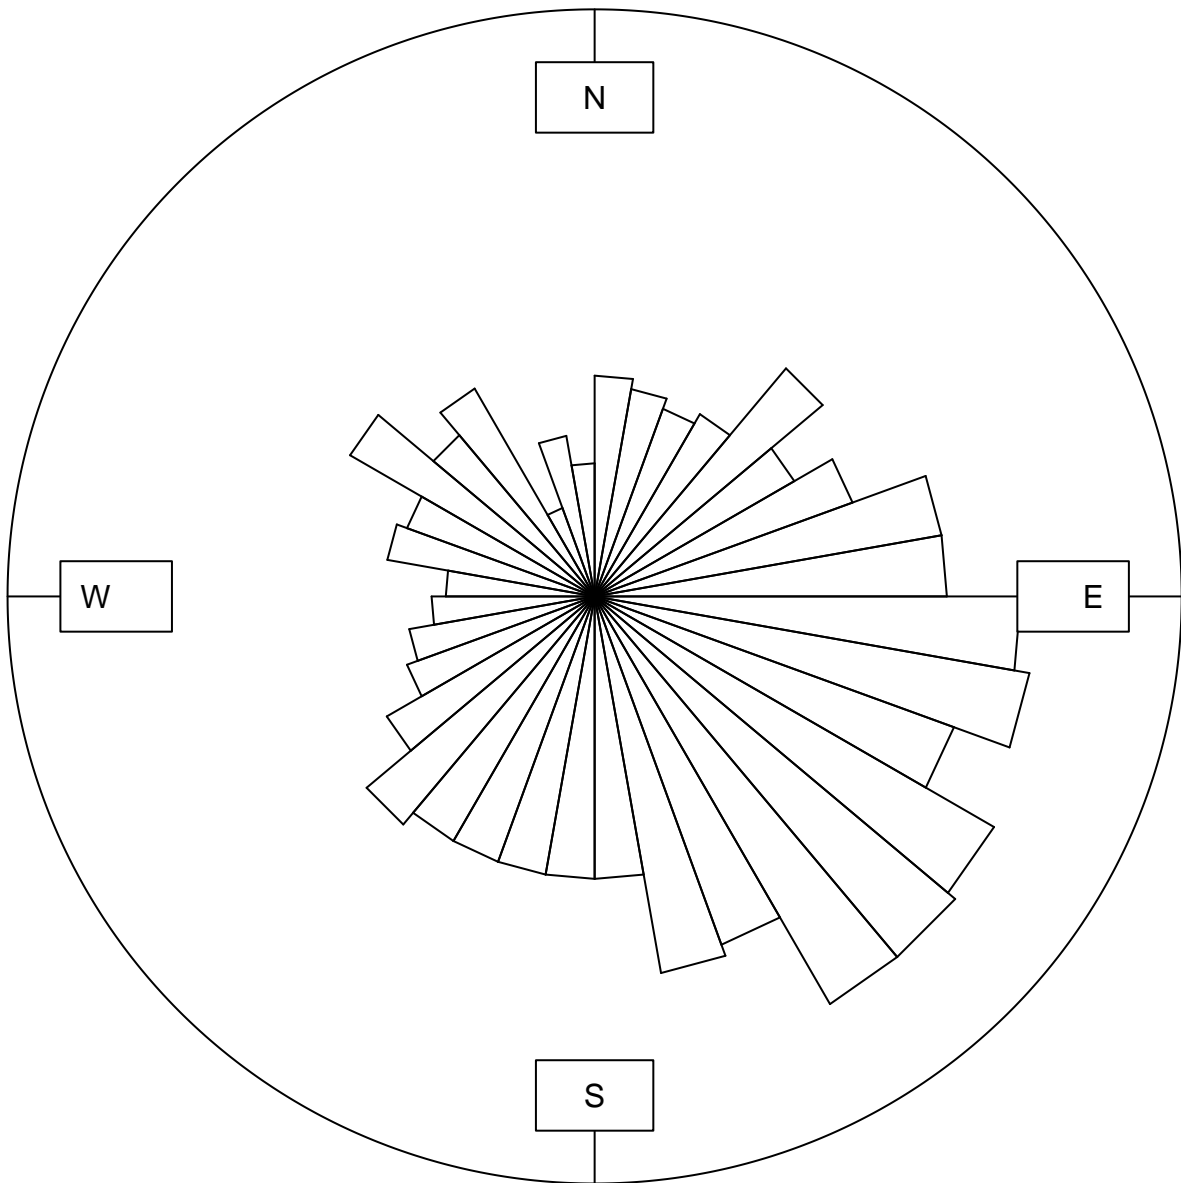

# bootstrap 691

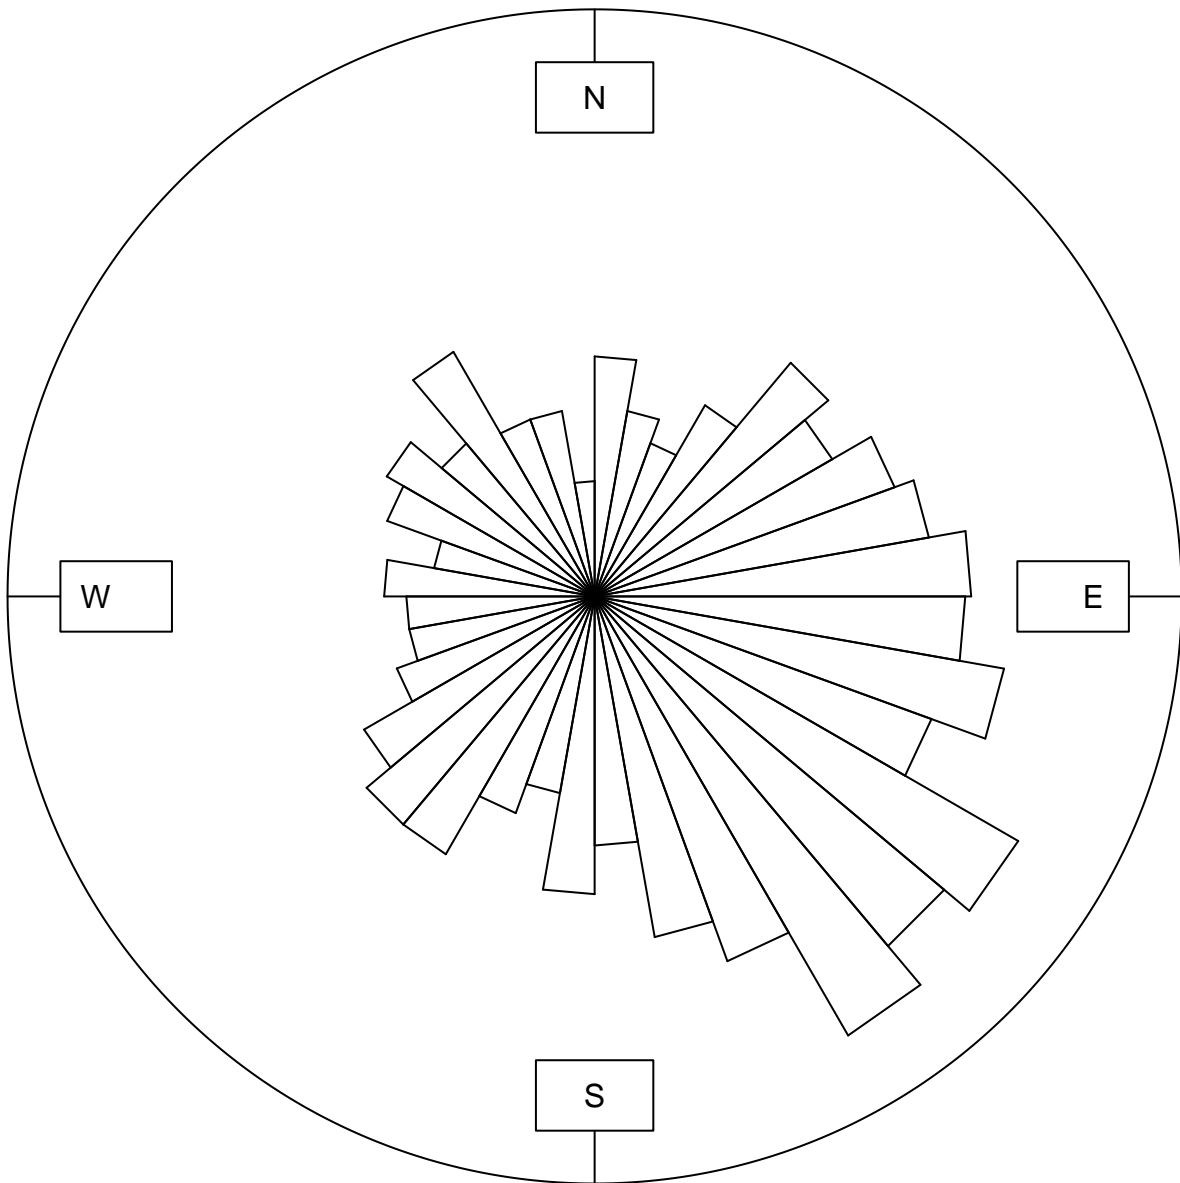

# bootstrap 692

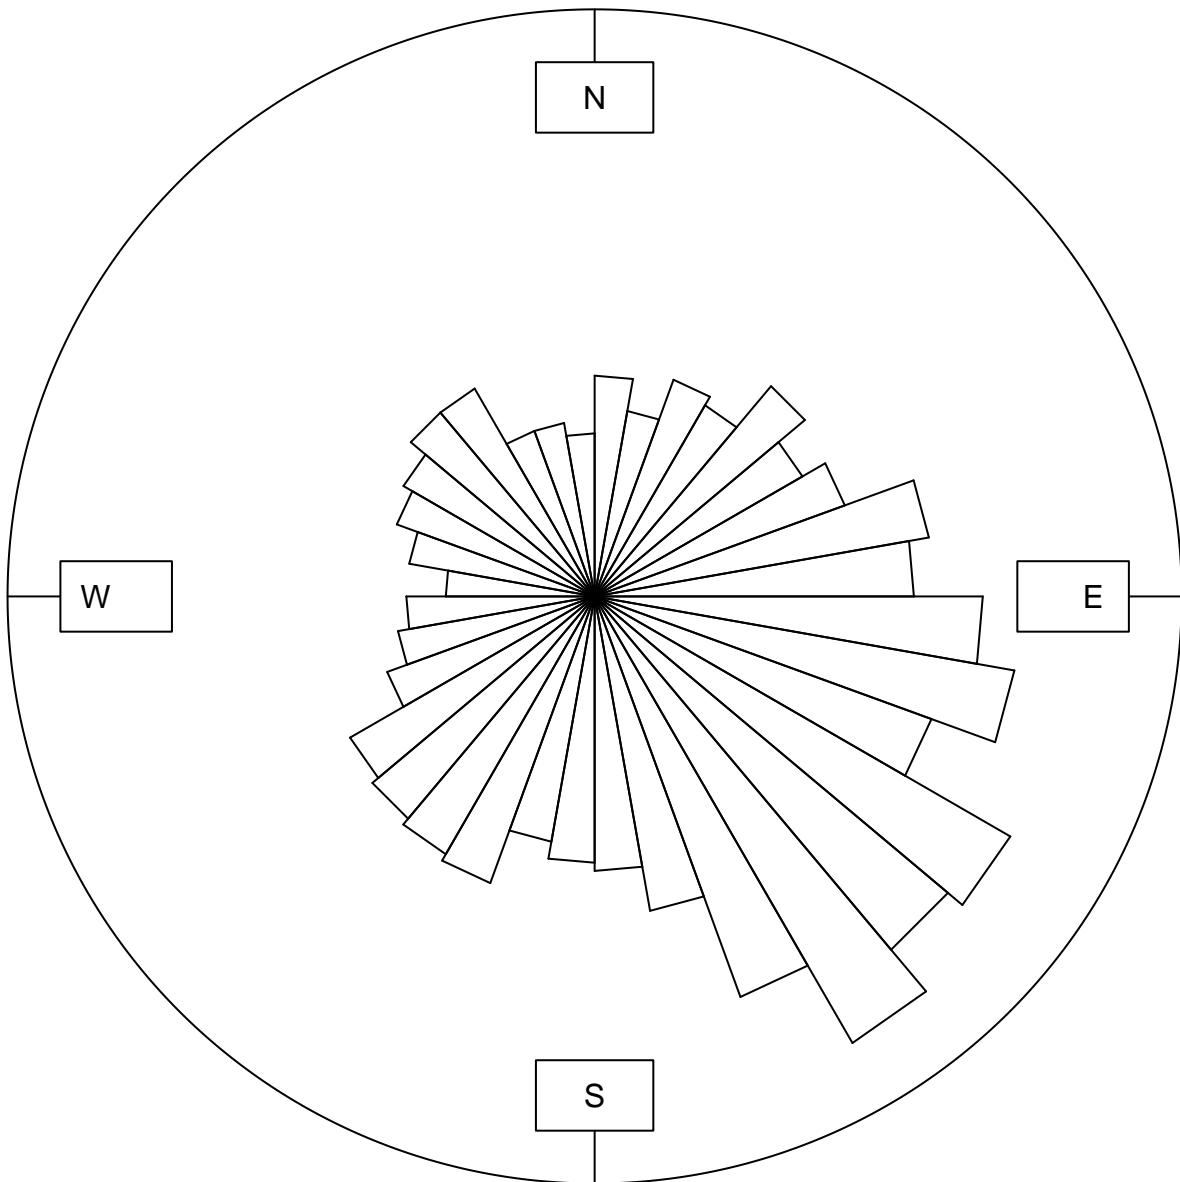

# bootstrap 693

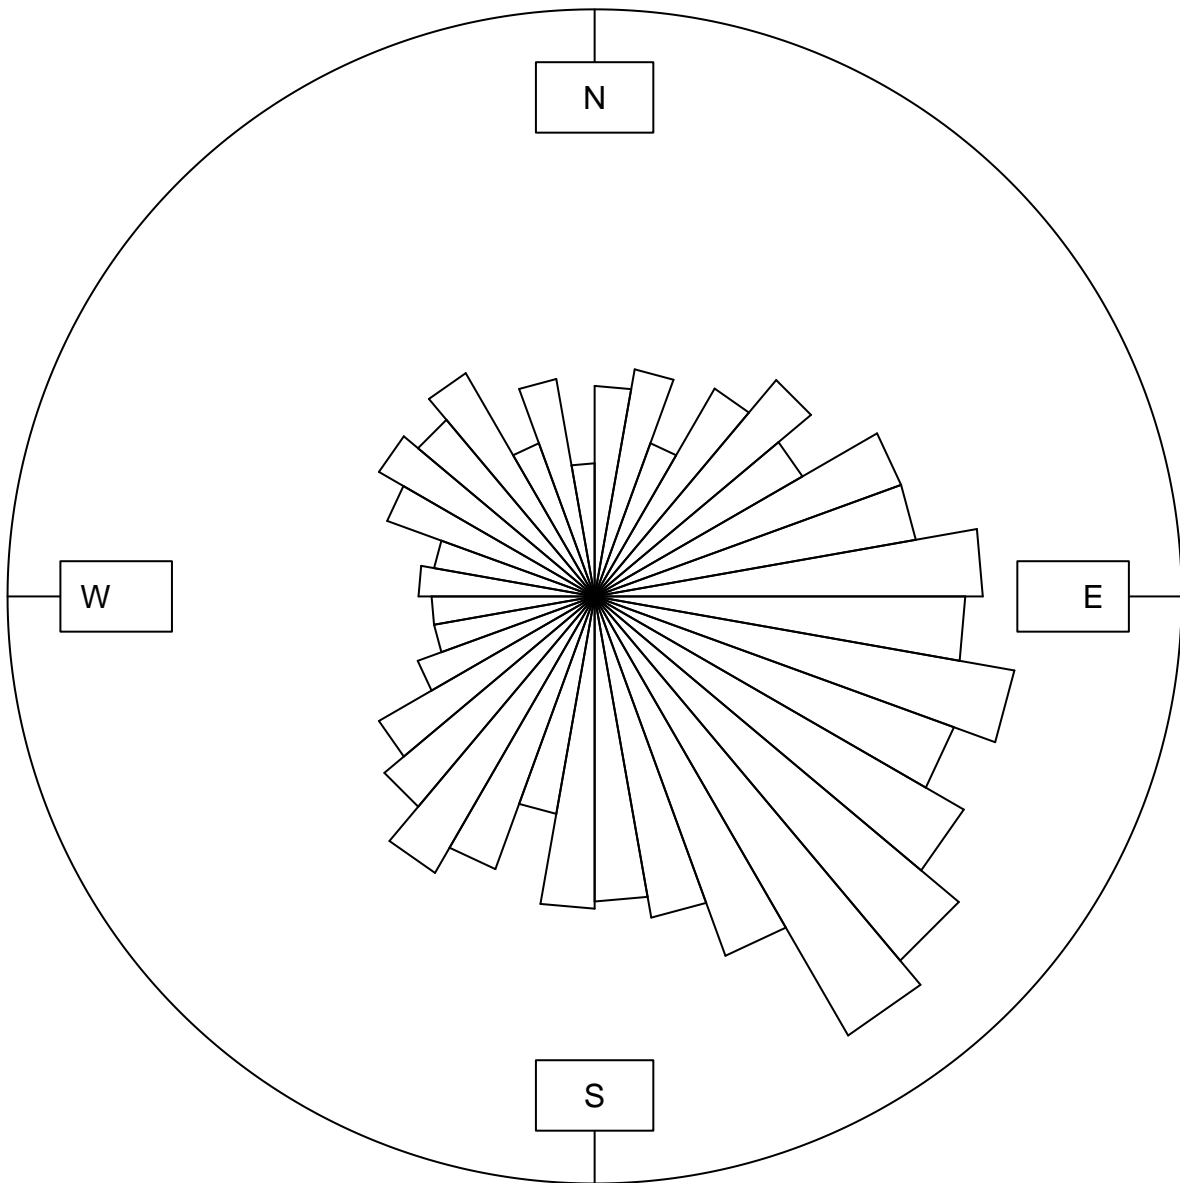

**bootstrap 694**

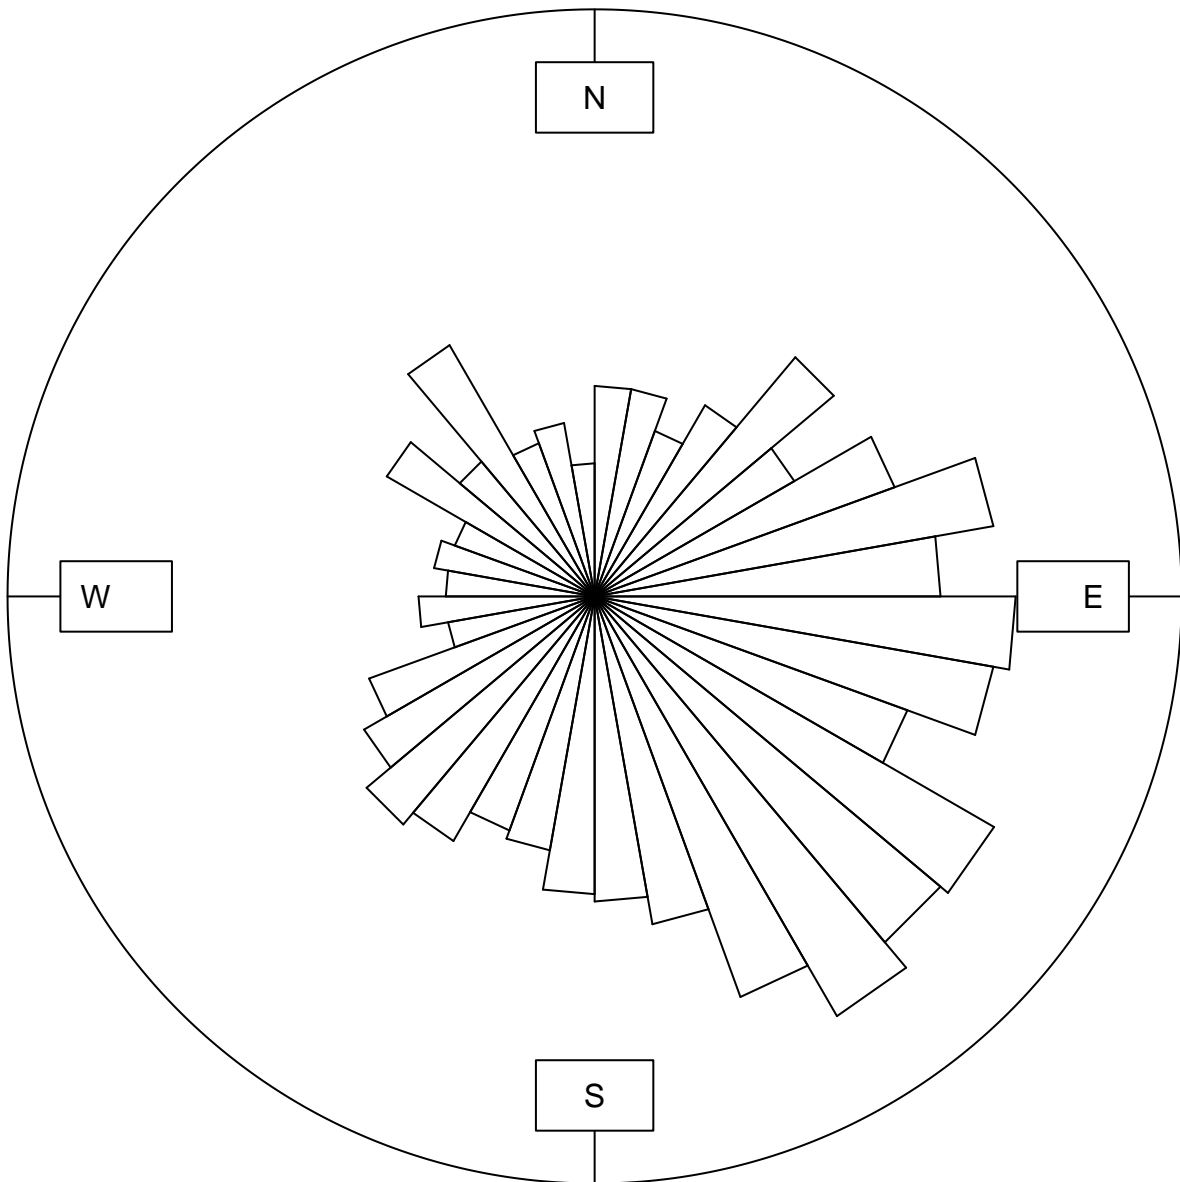

# bootstrap 695

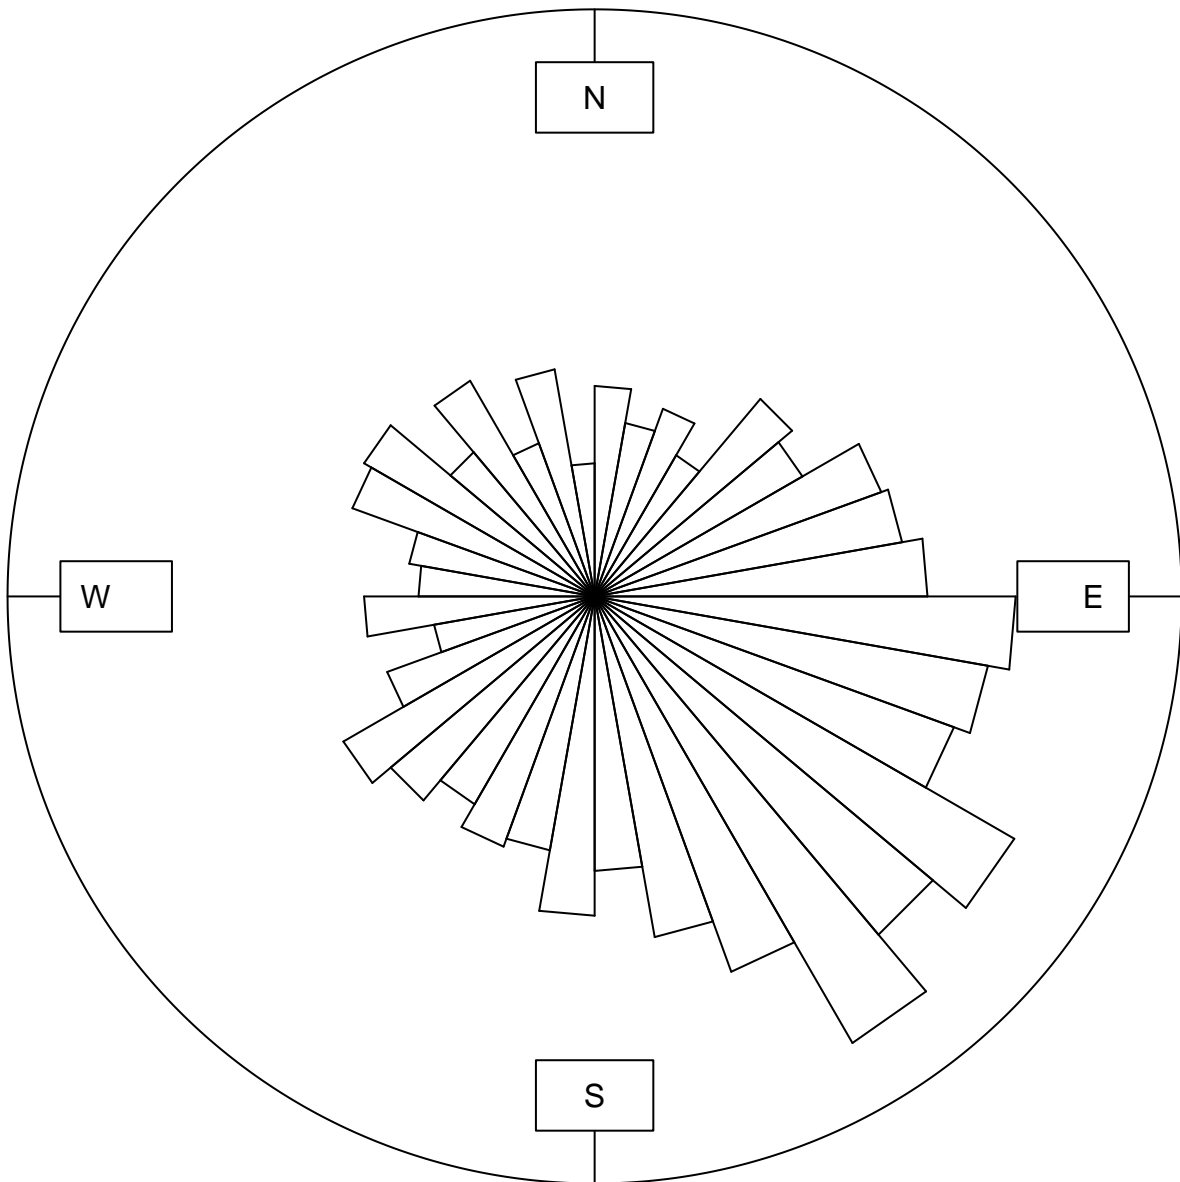

# bootstrap 696

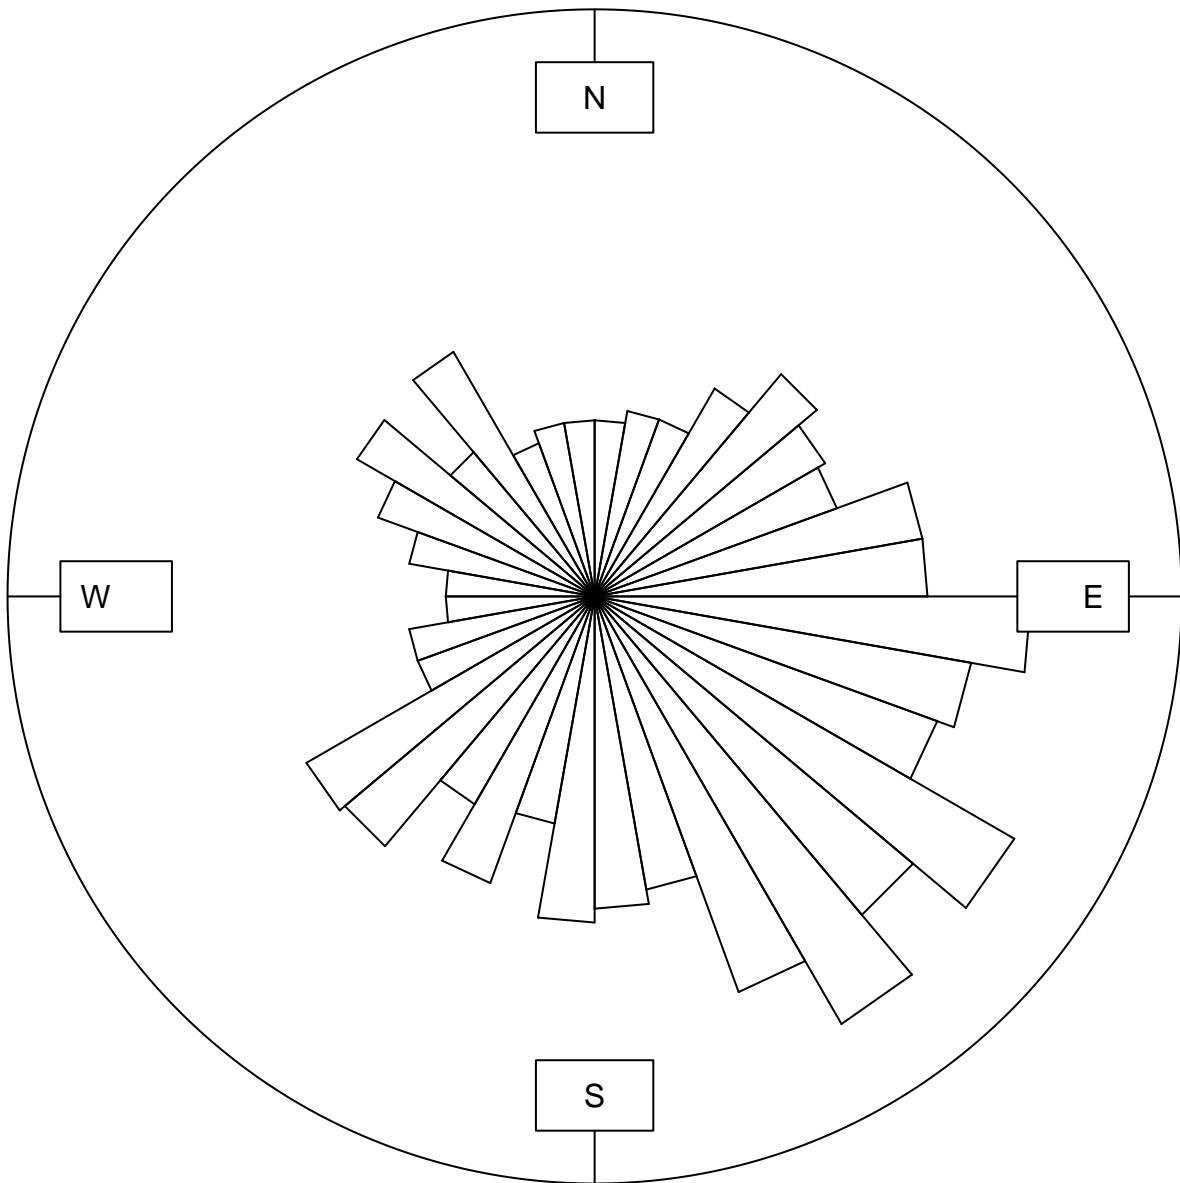



# bootstrap 697

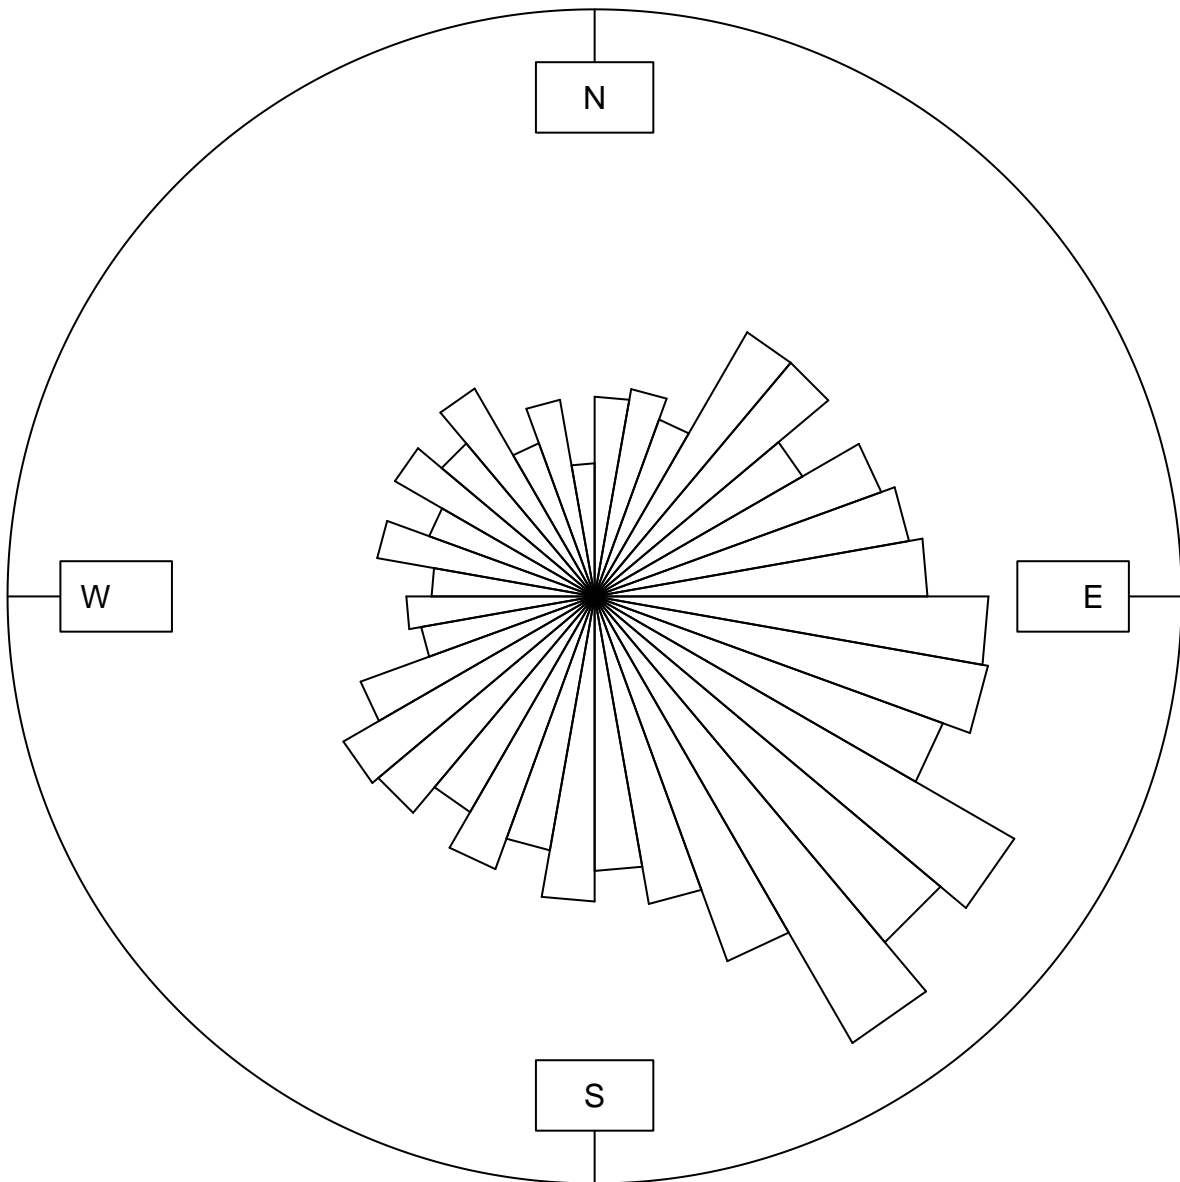

**bootstrap 698**

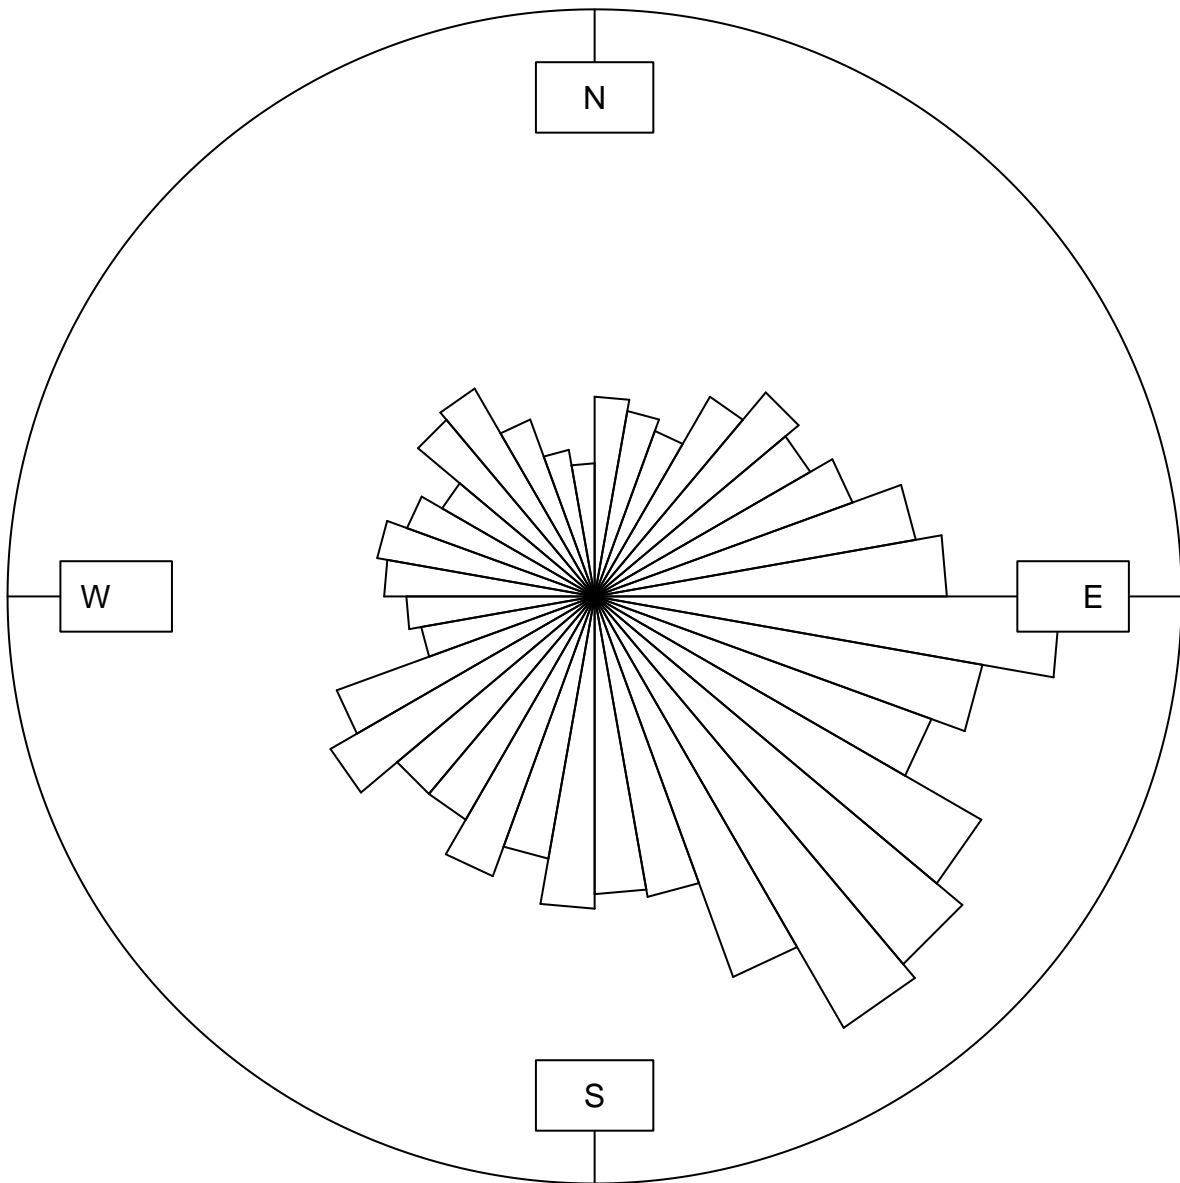

# bootstrap 699

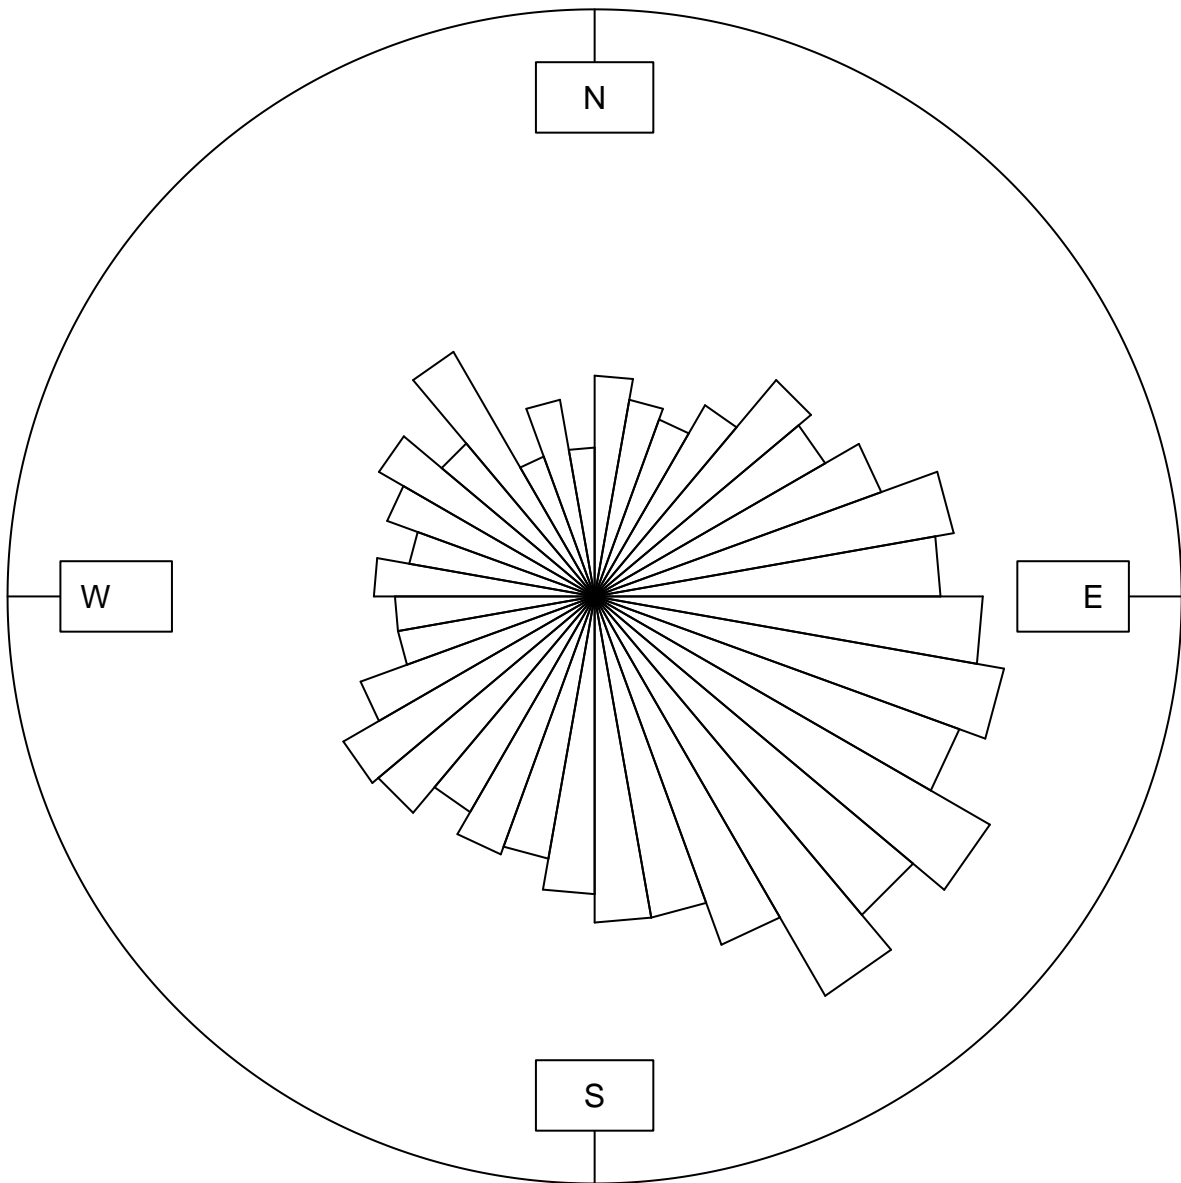

# bootstrap 700

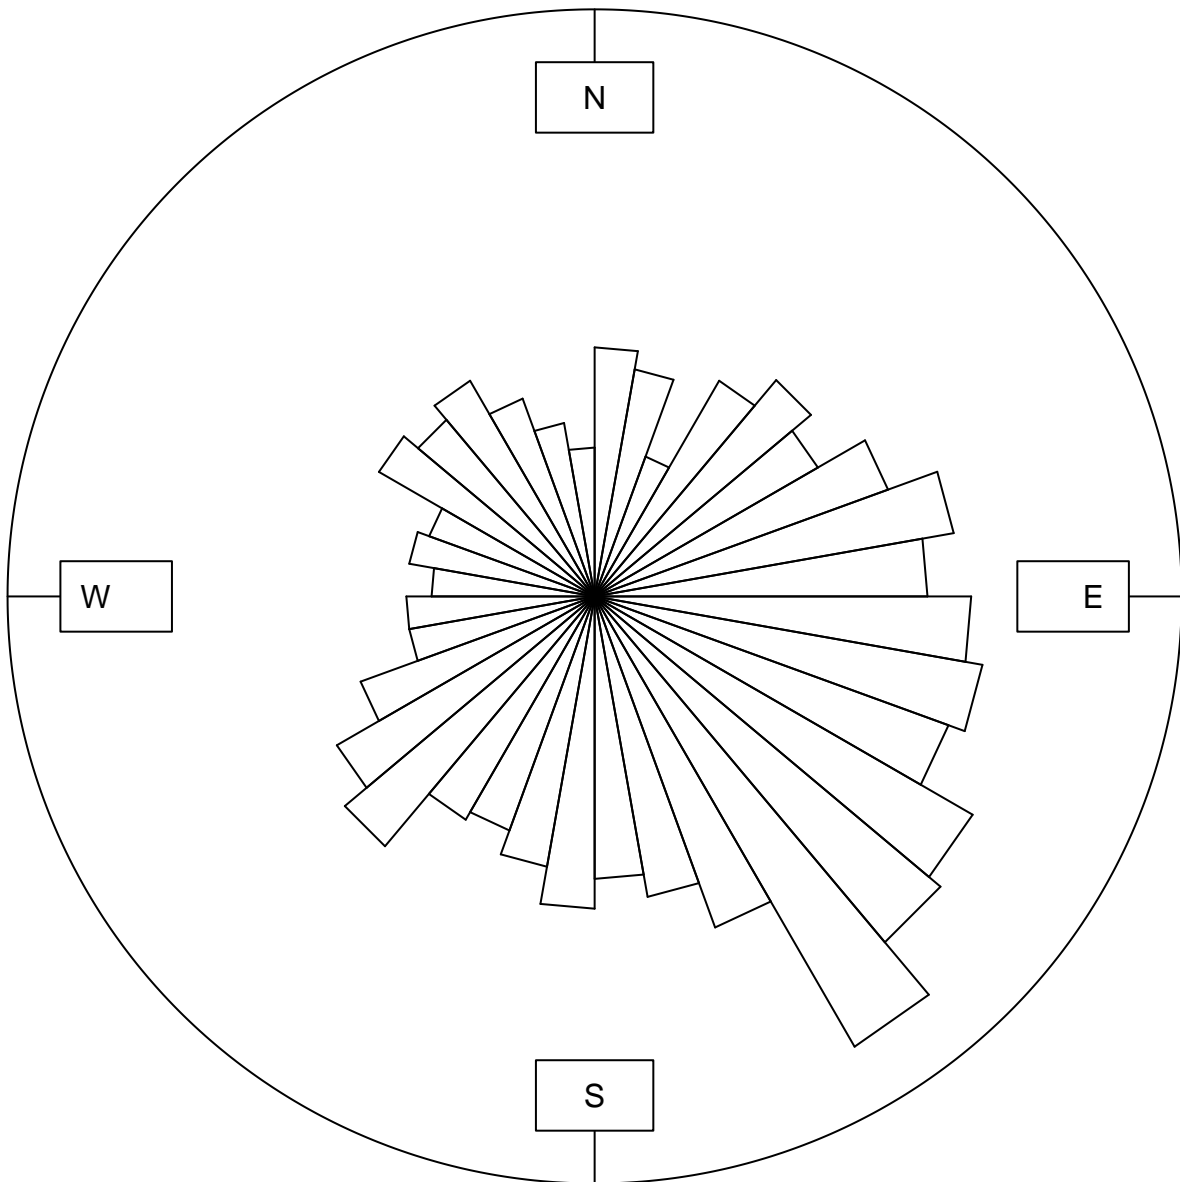

# bootstrap 701

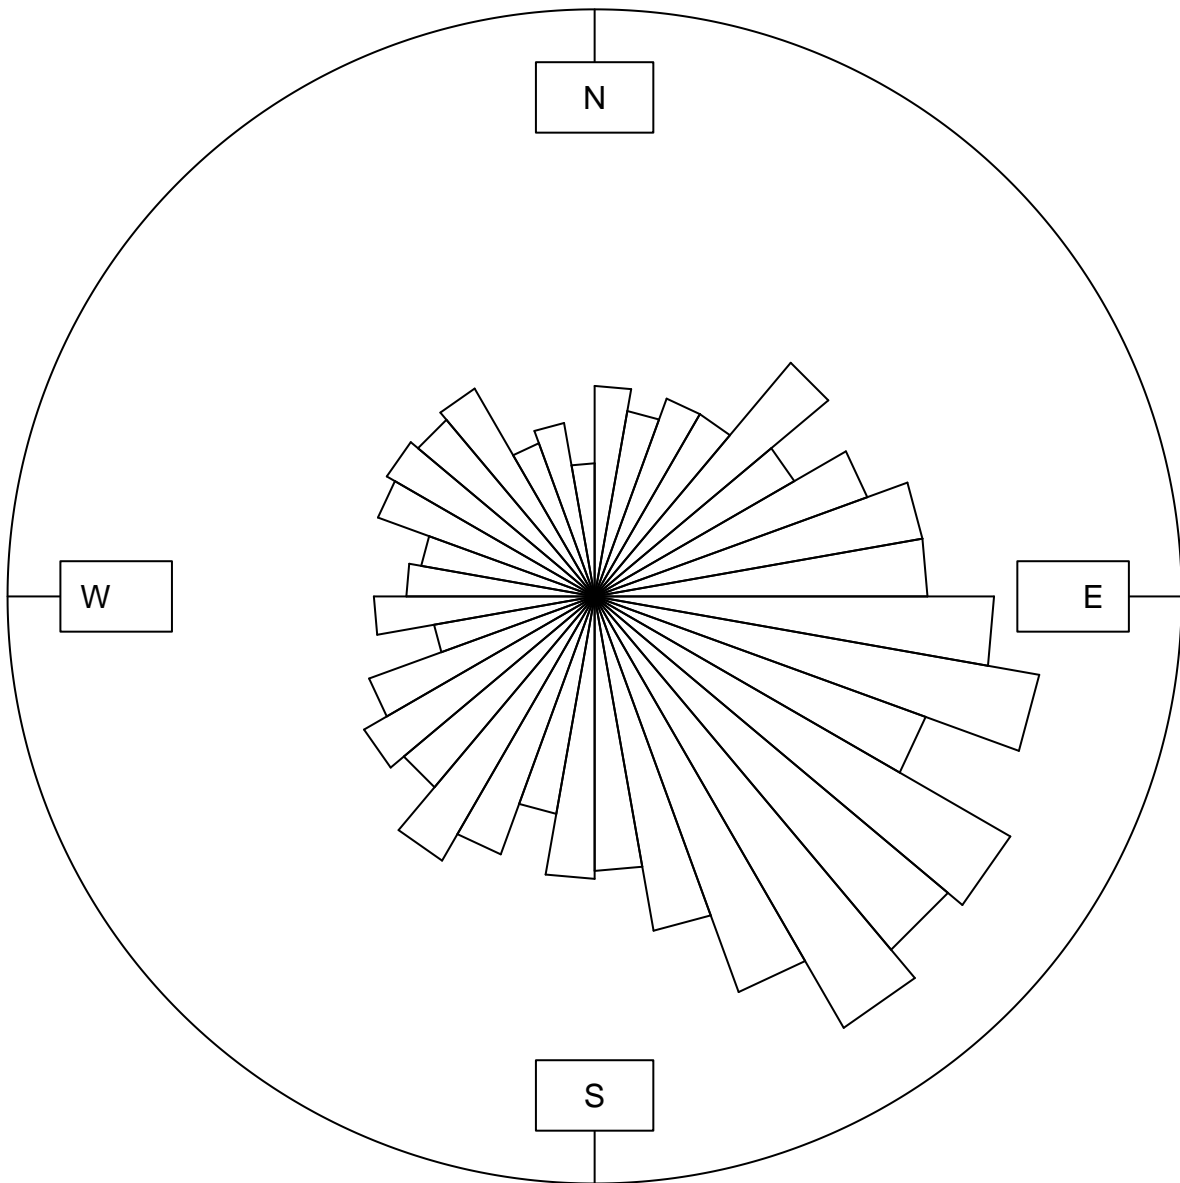

# bootstrap 702

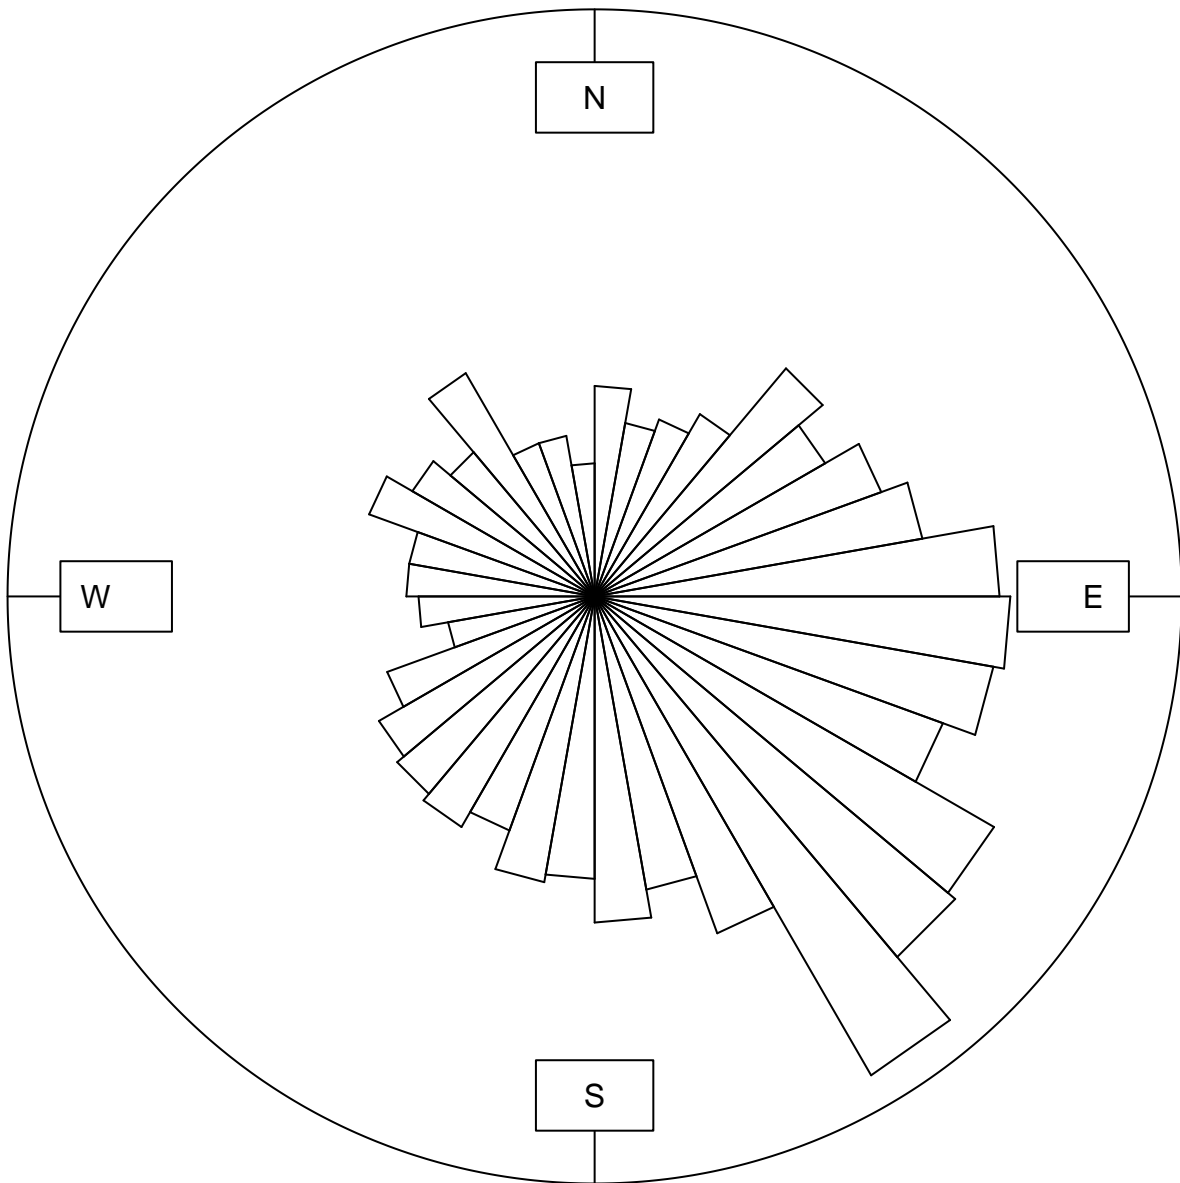

# bootstrap 703

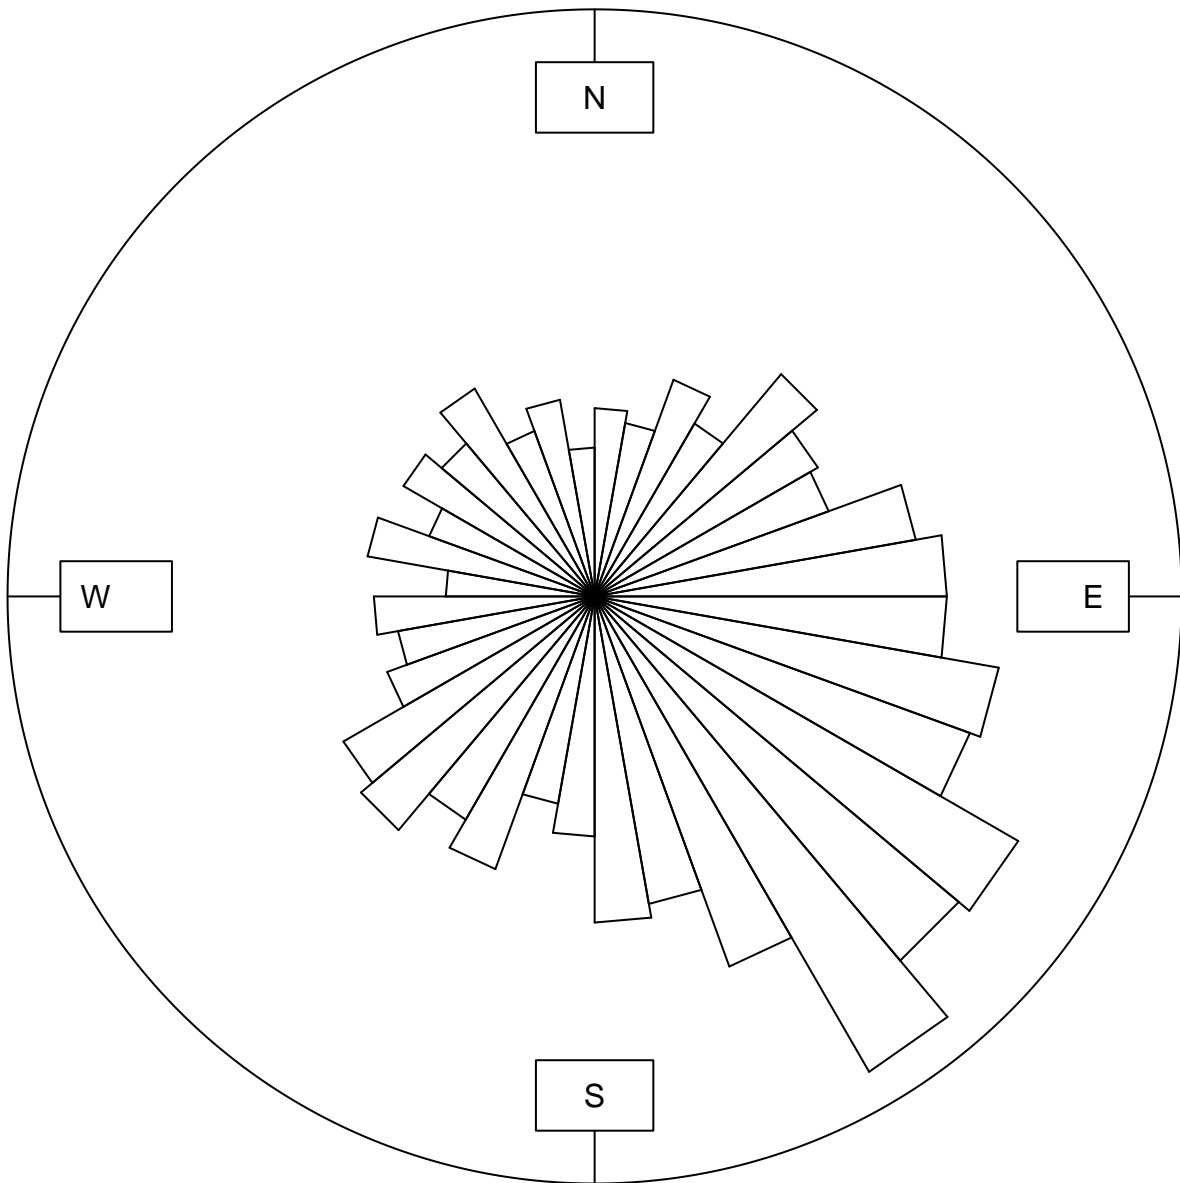

# bootstrap 704

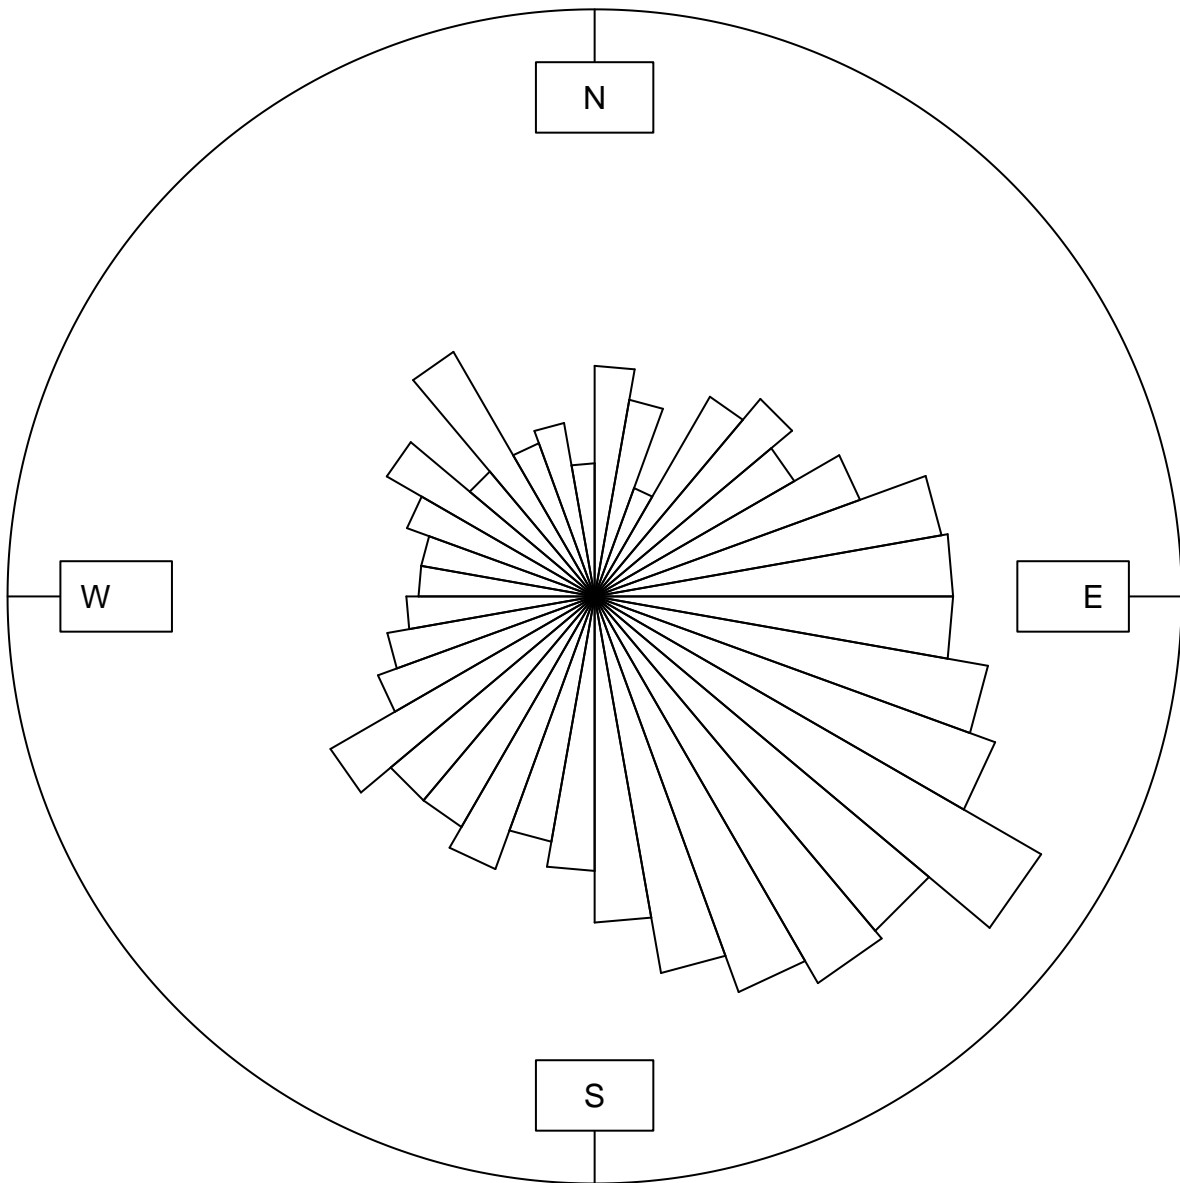



# bootstrap 705

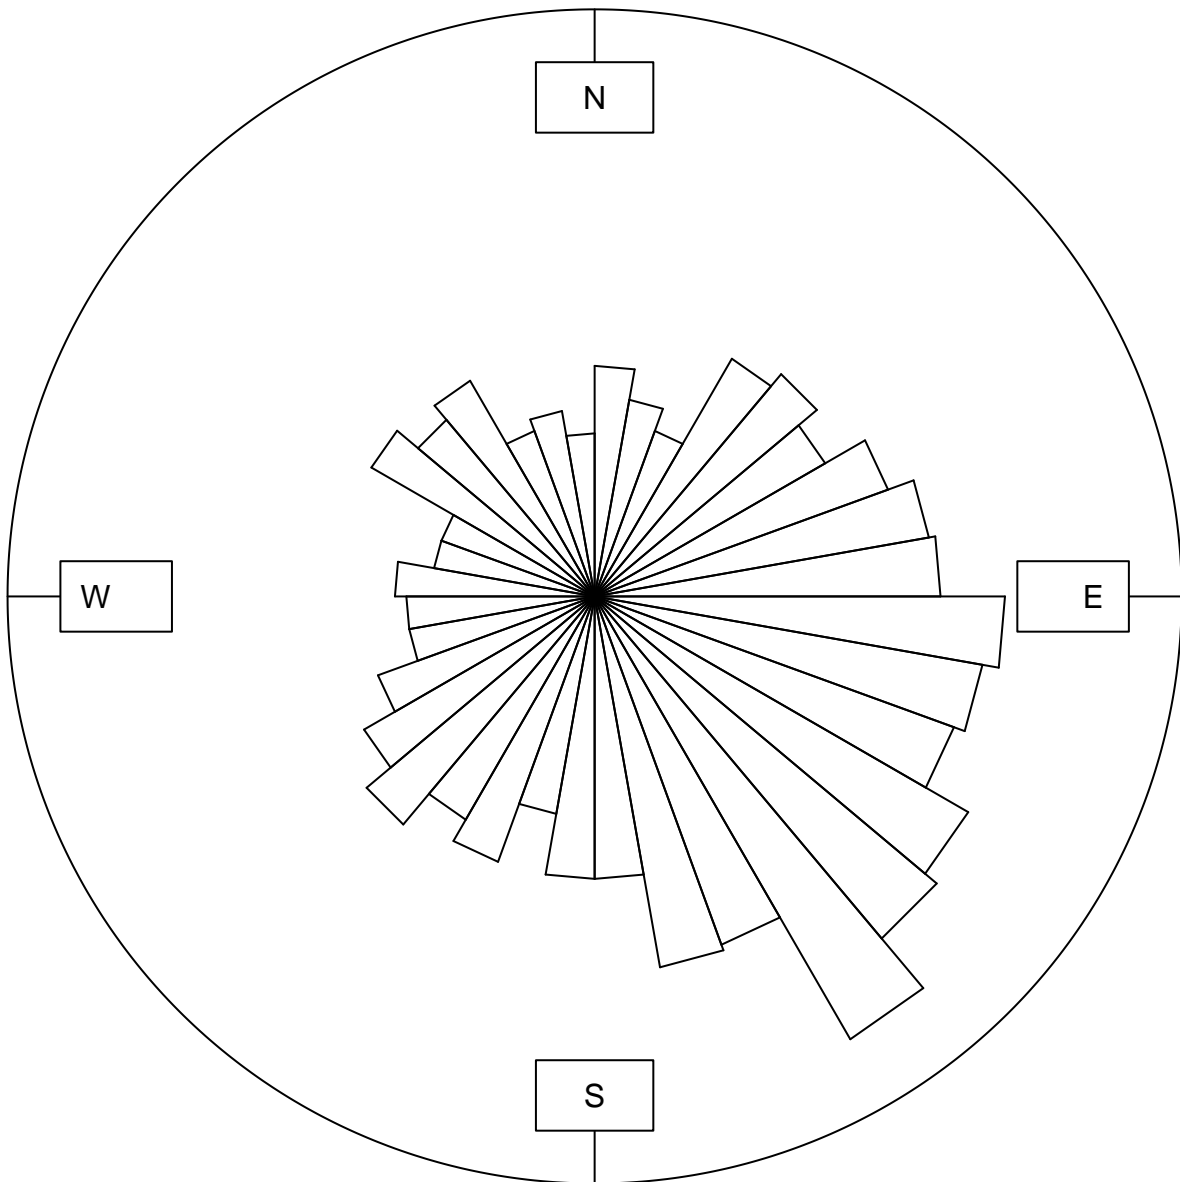

# bootstrap 706

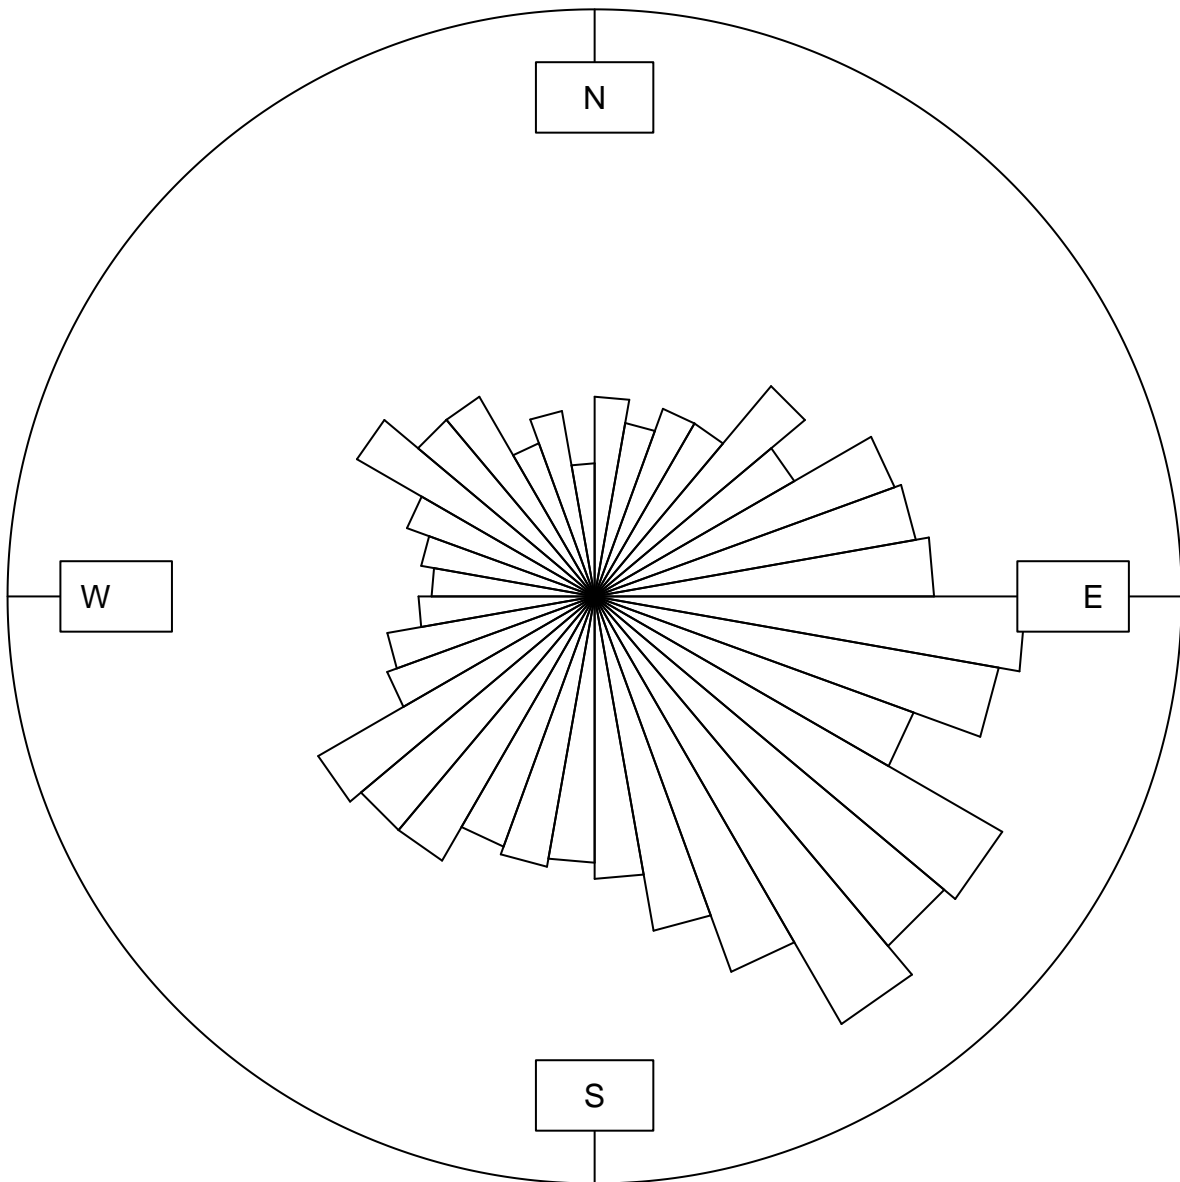

# bootstrap 707

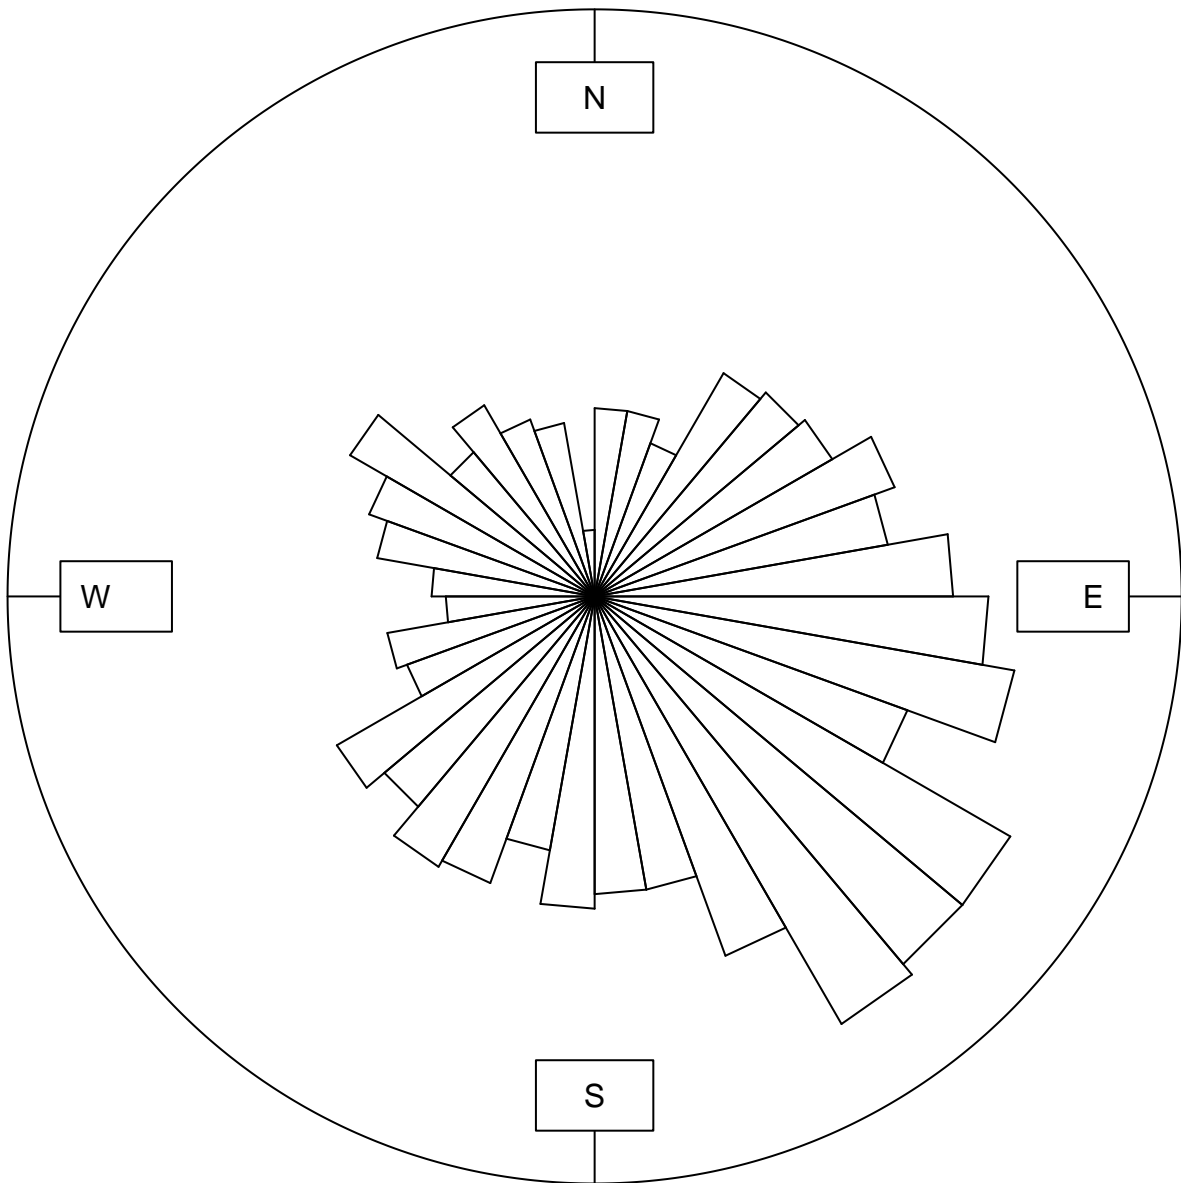

# bootstrap 708

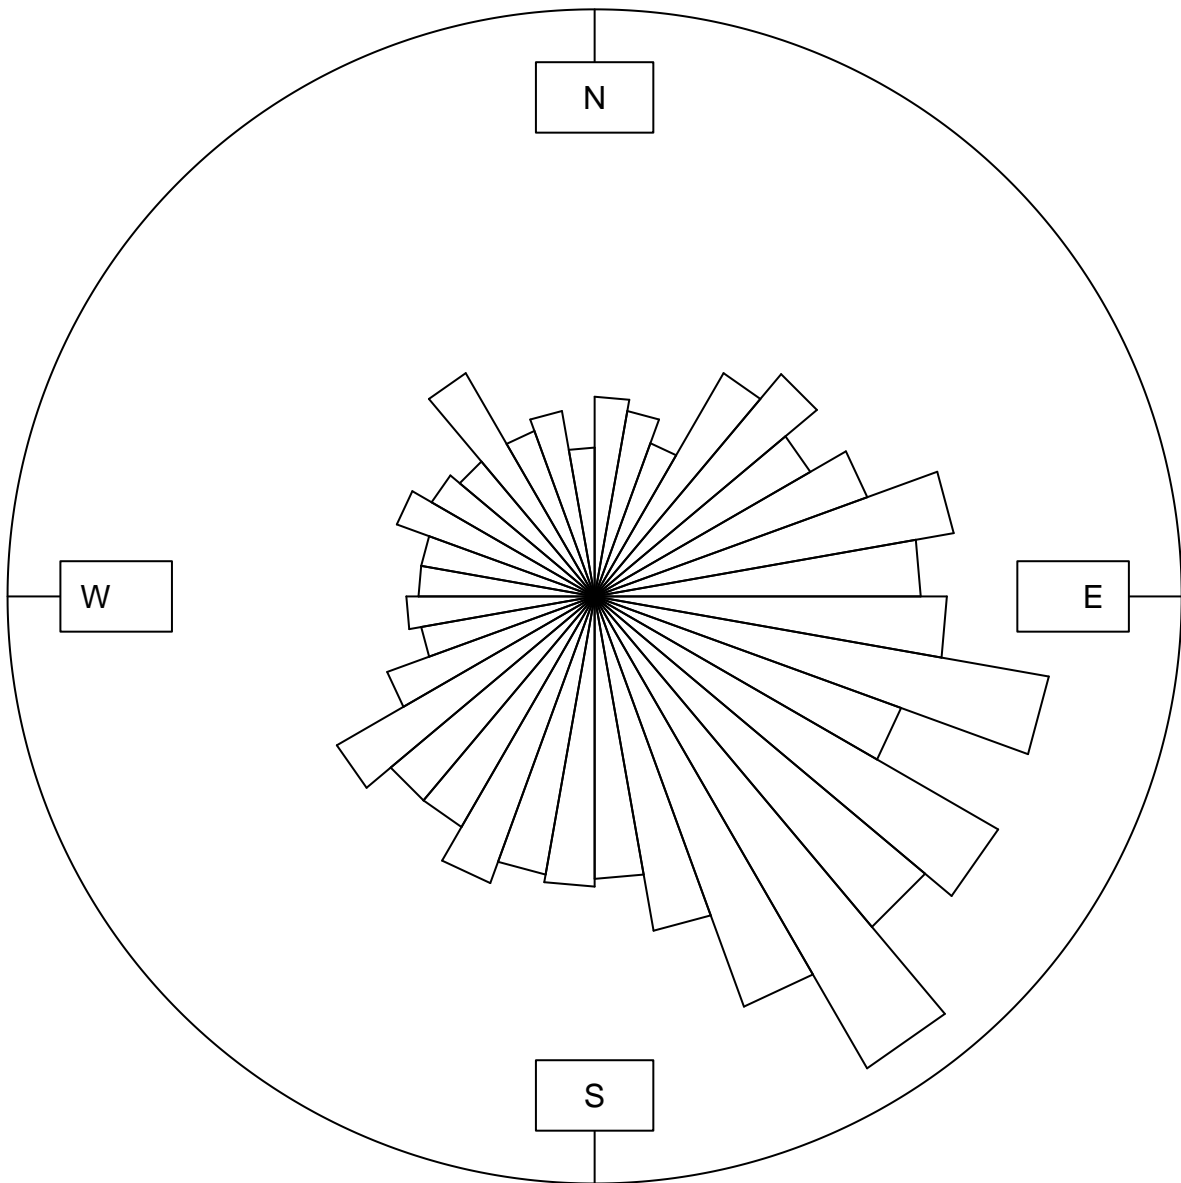

# bootstrap 709

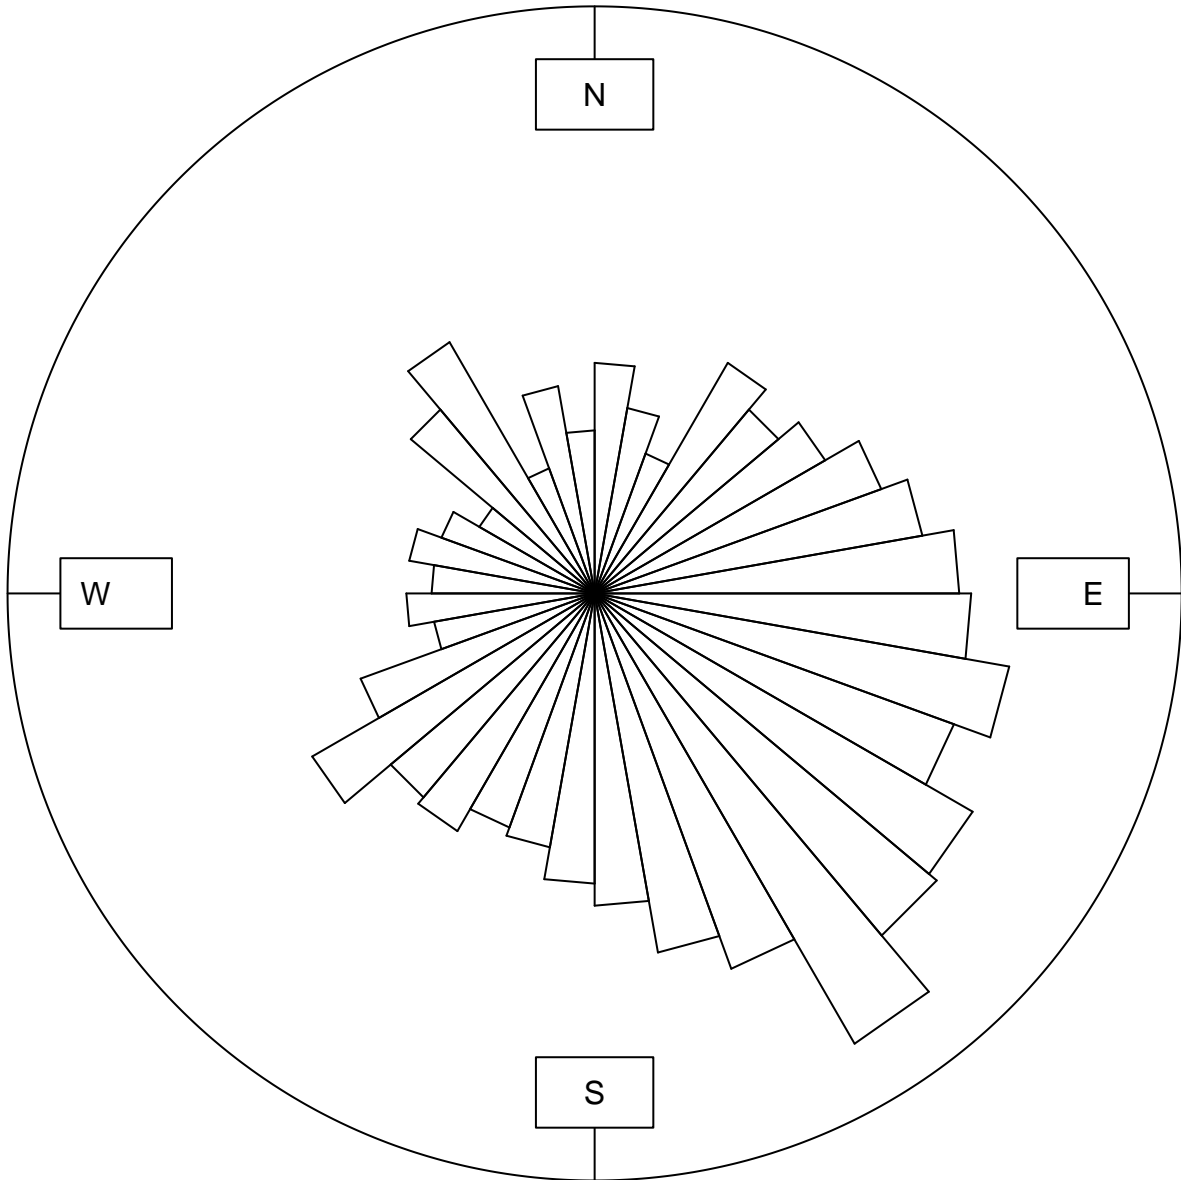

# bootstrap 710

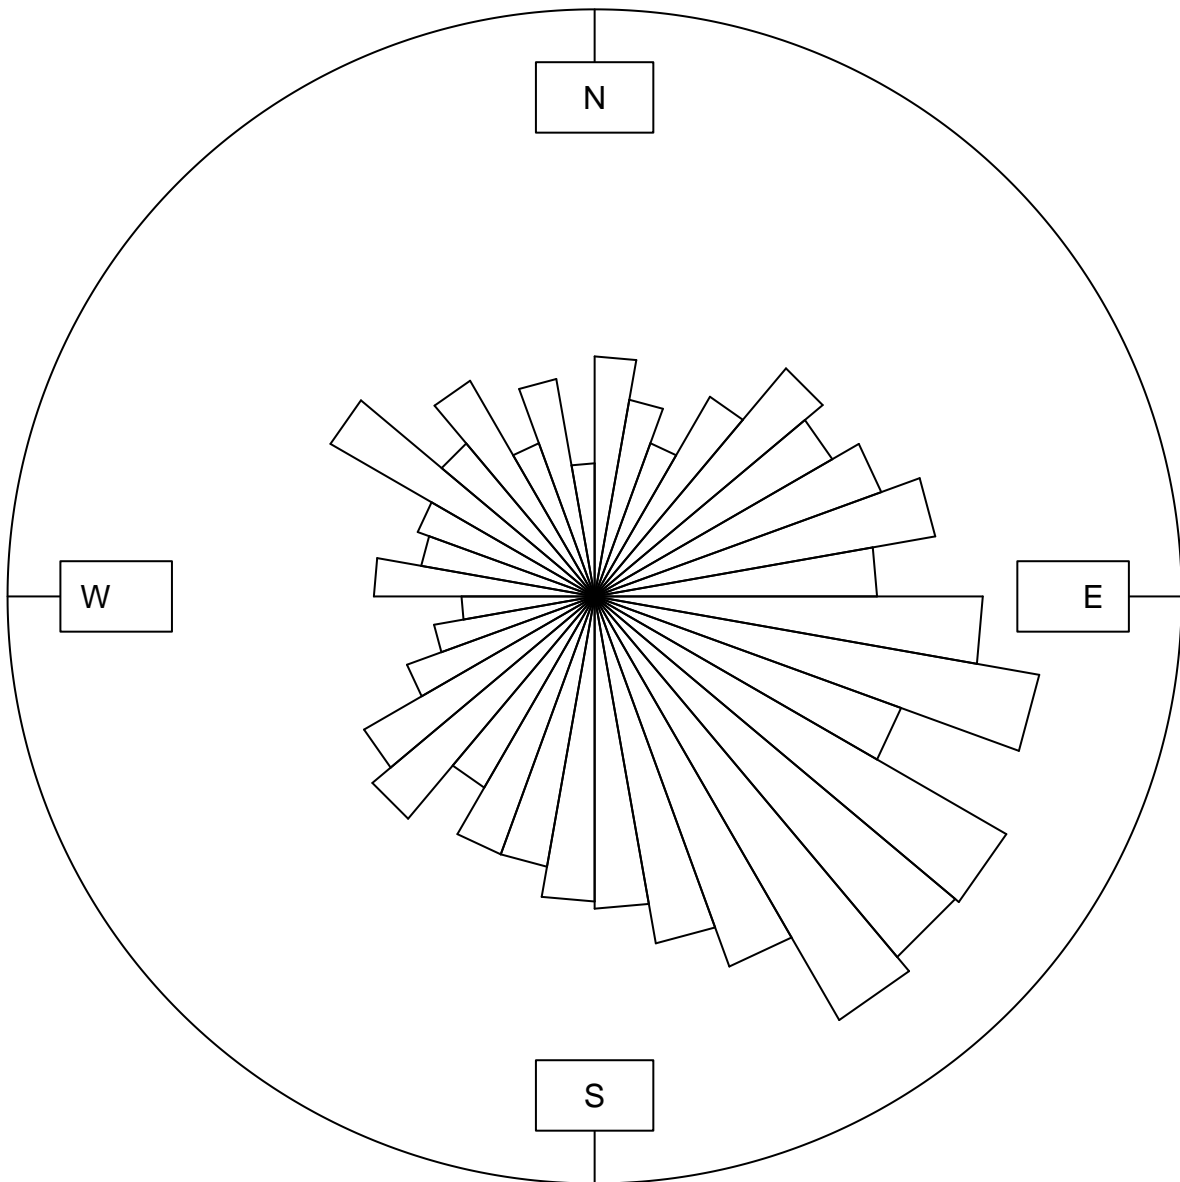

# bootstrap 711

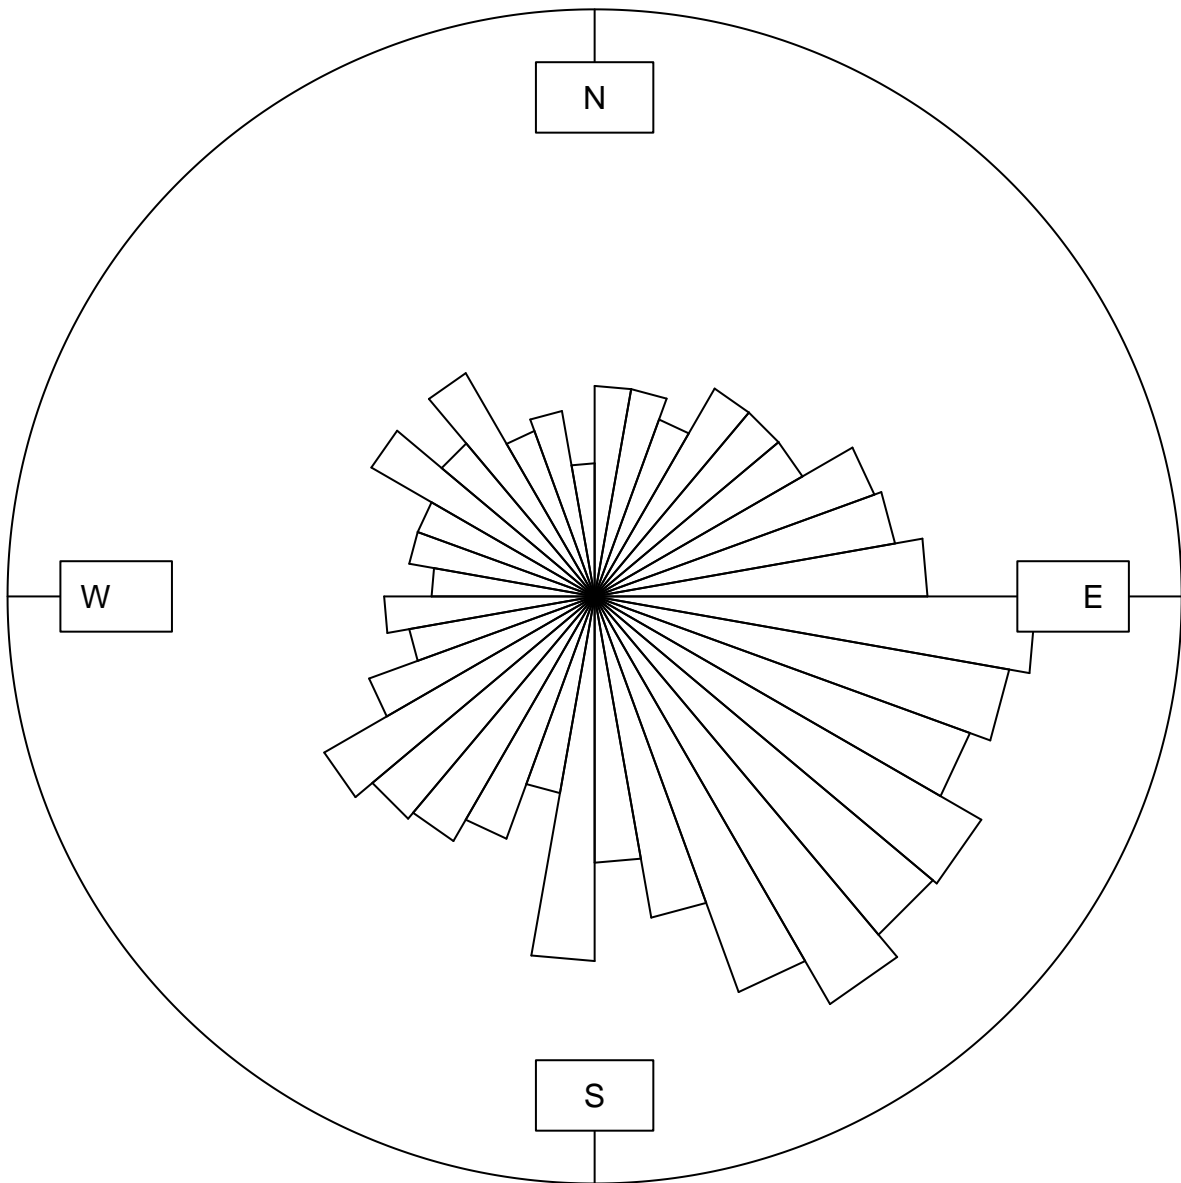

# bootstrap 712

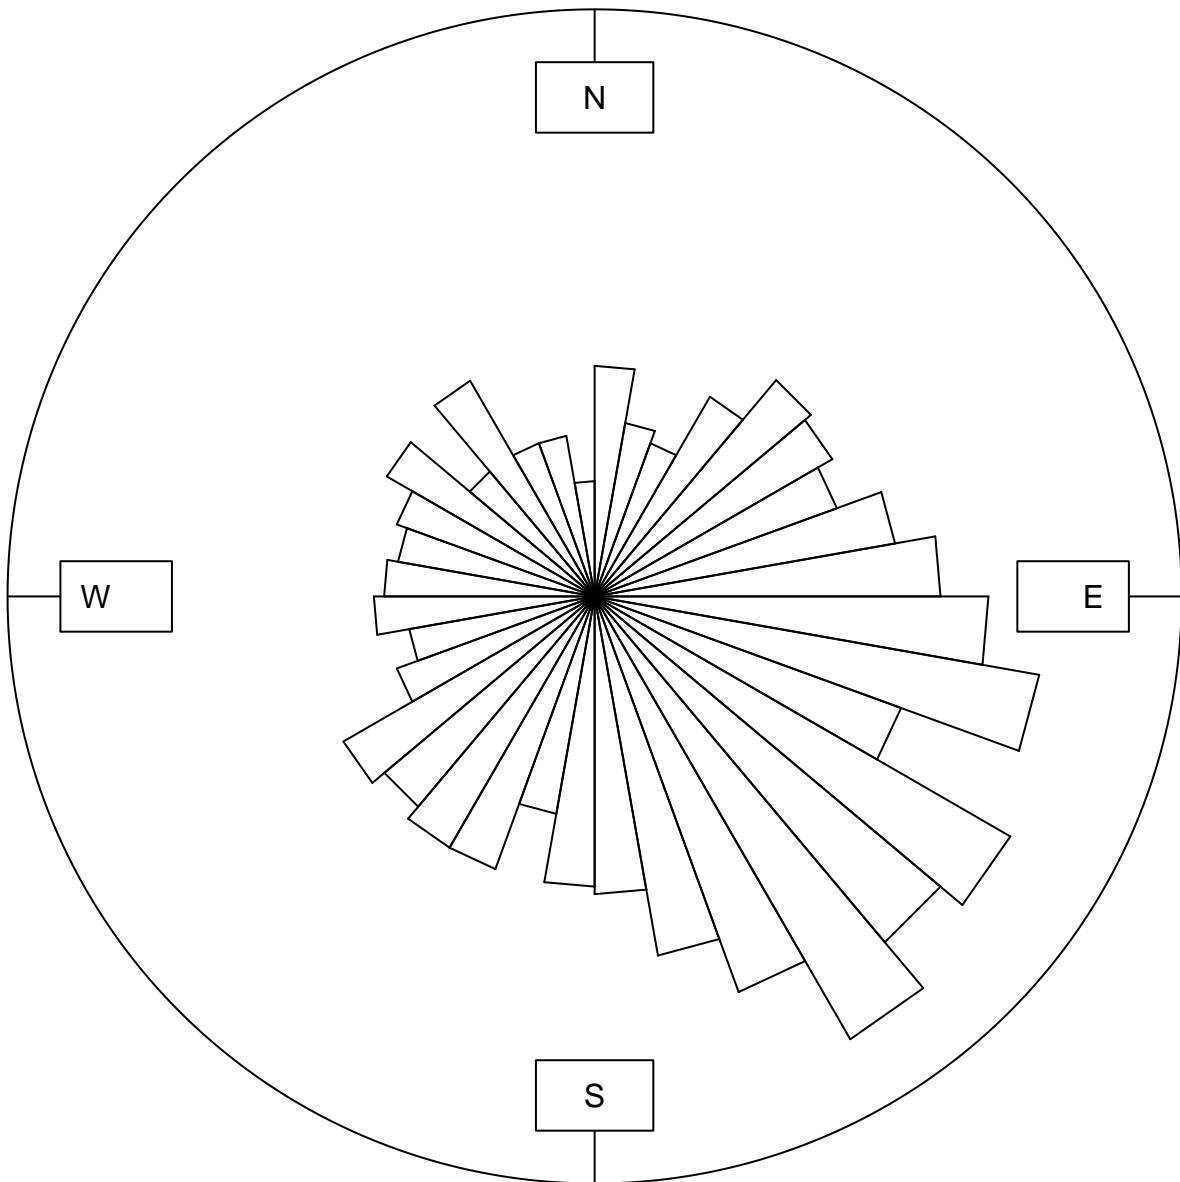



# bootstrap 713

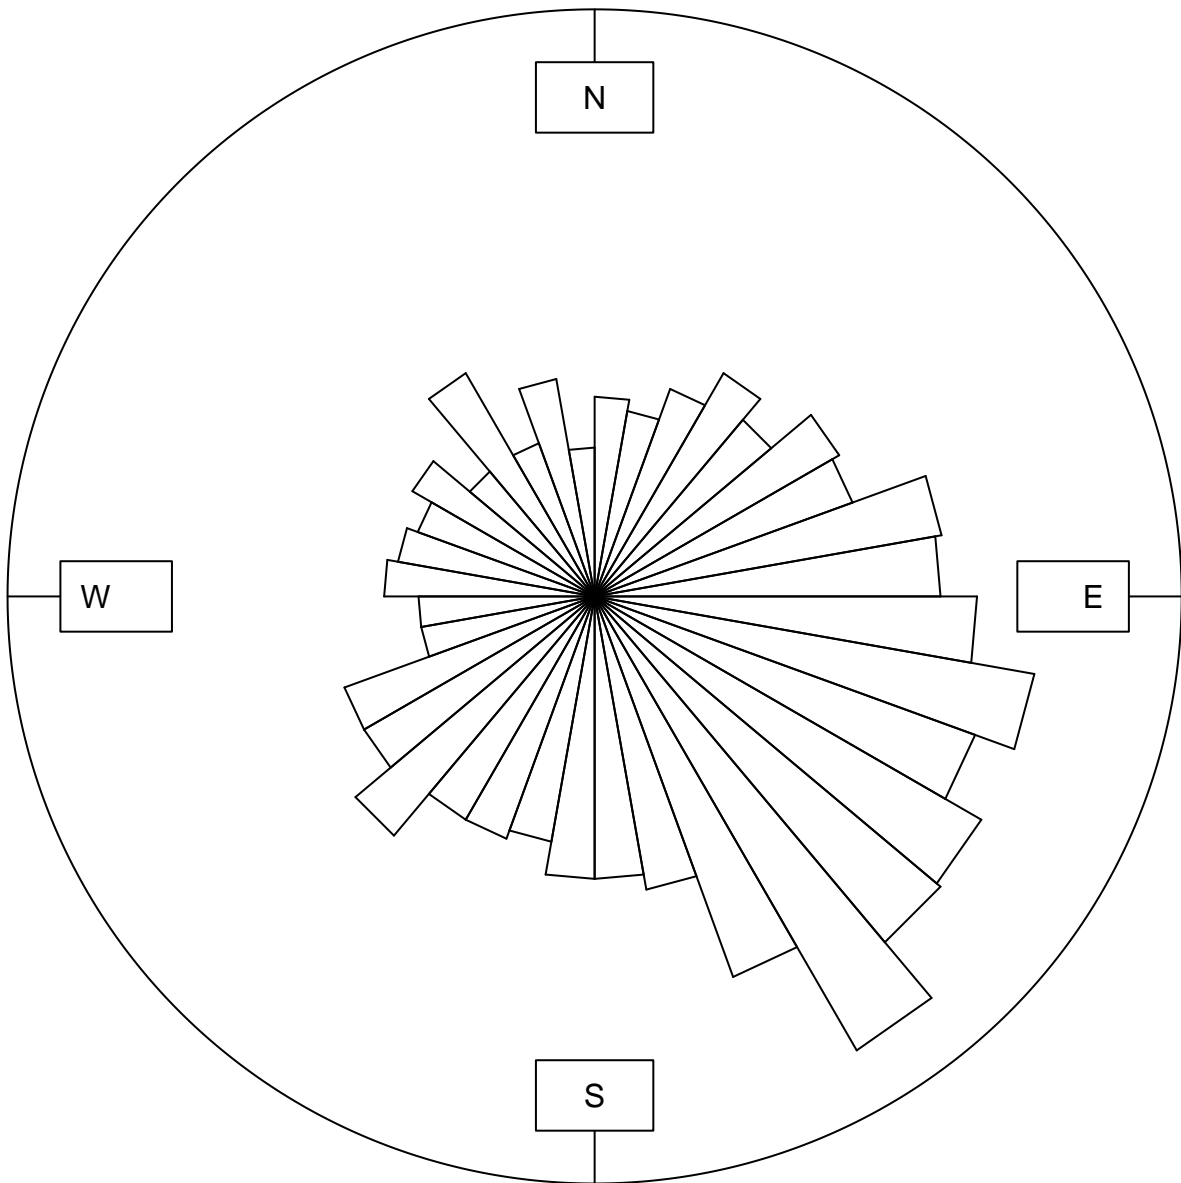

# bootstrap 714

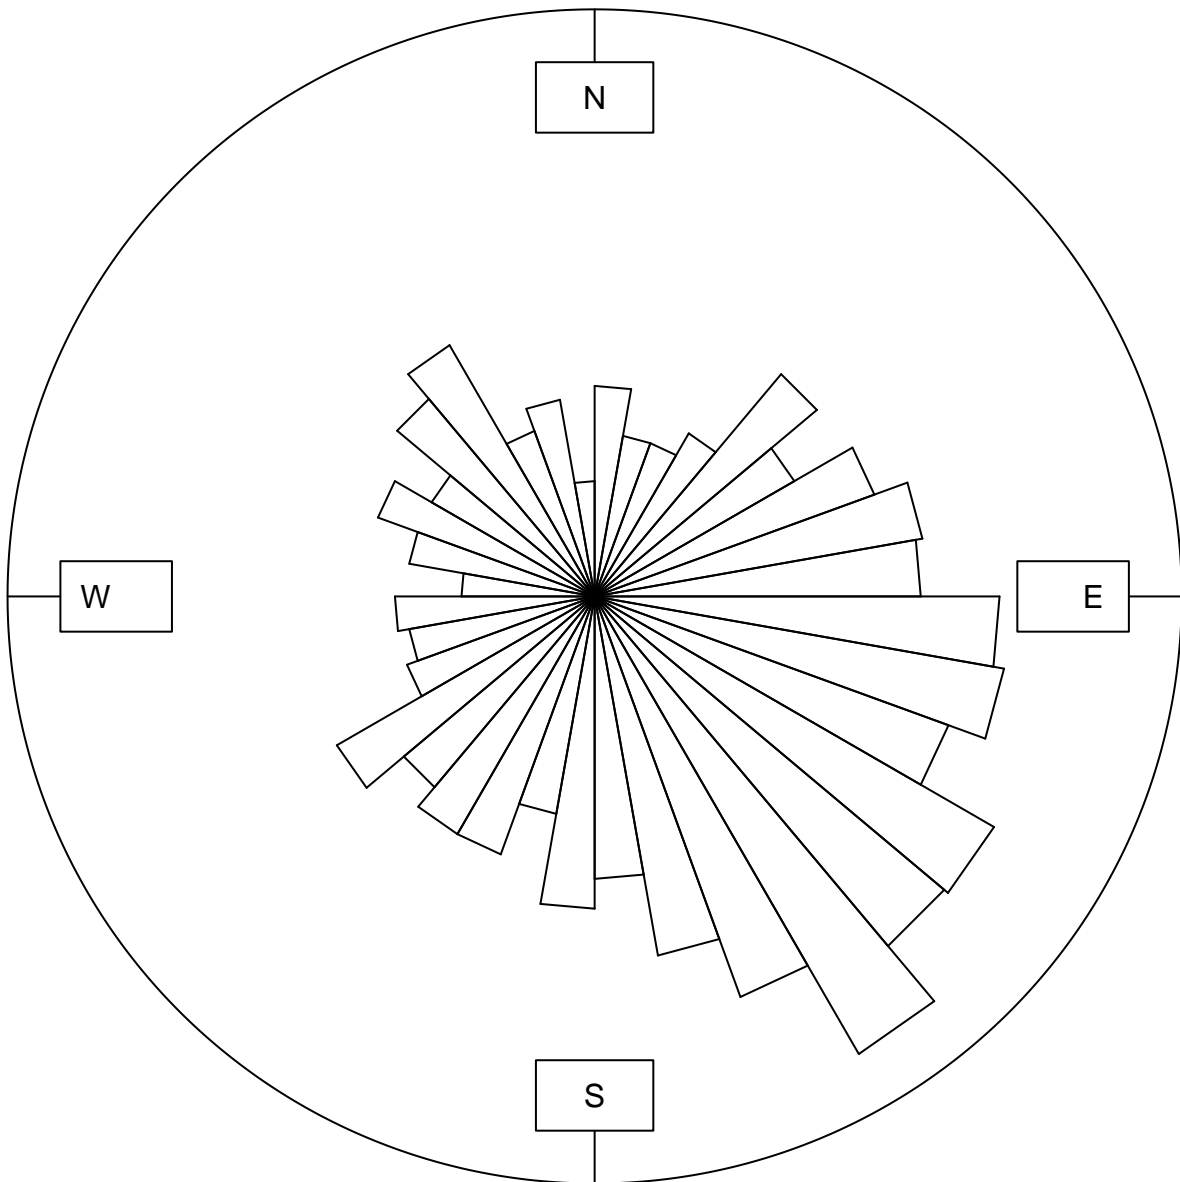

# bootstrap 715

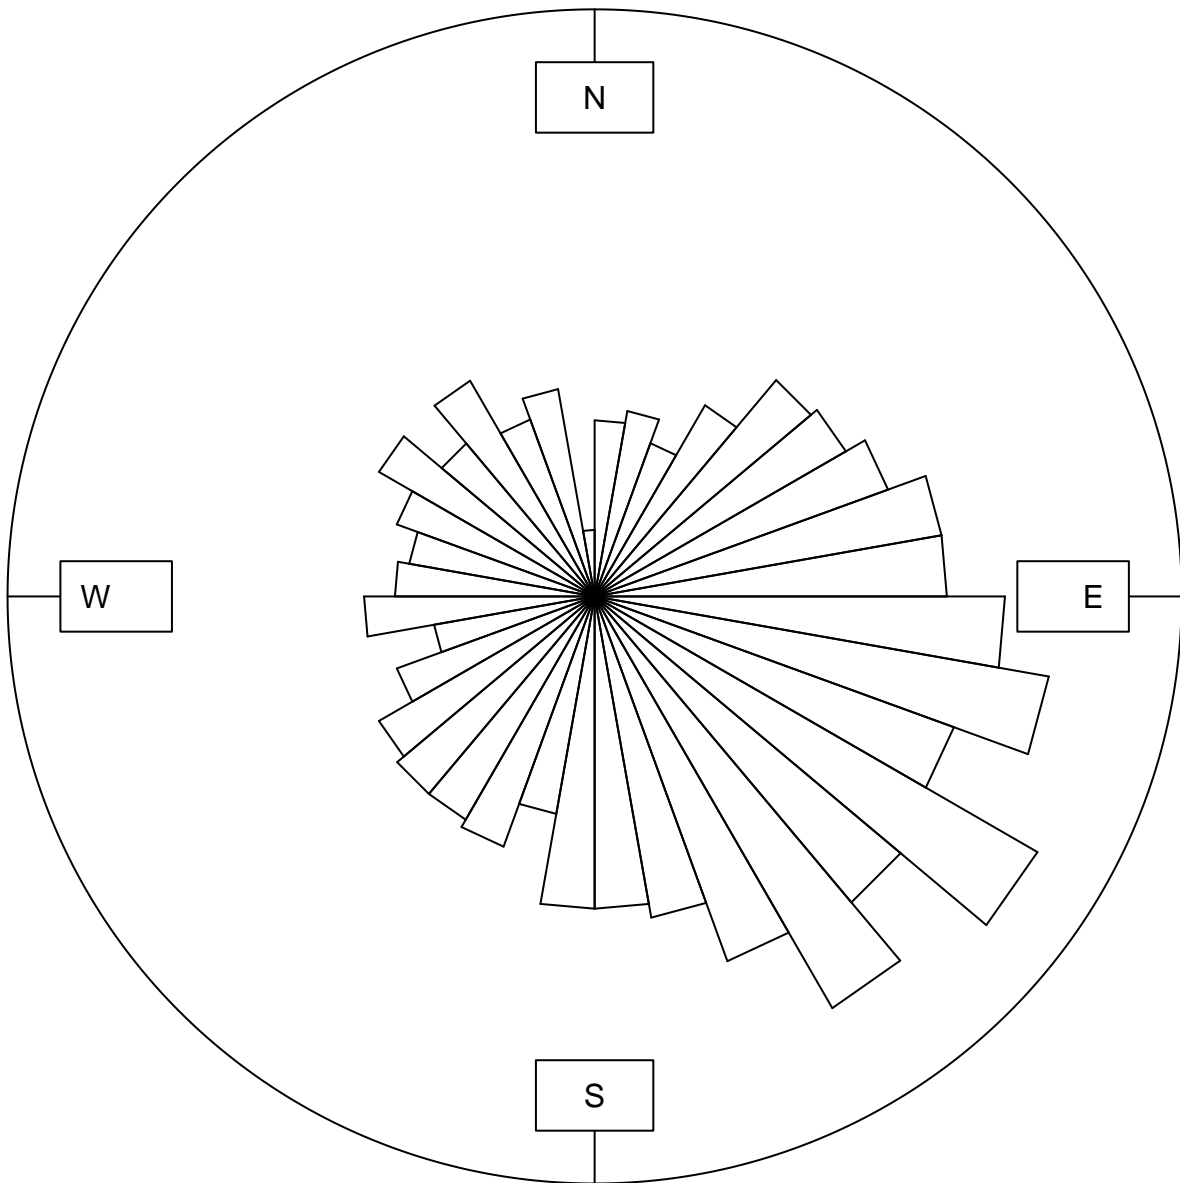

# bootstrap 716

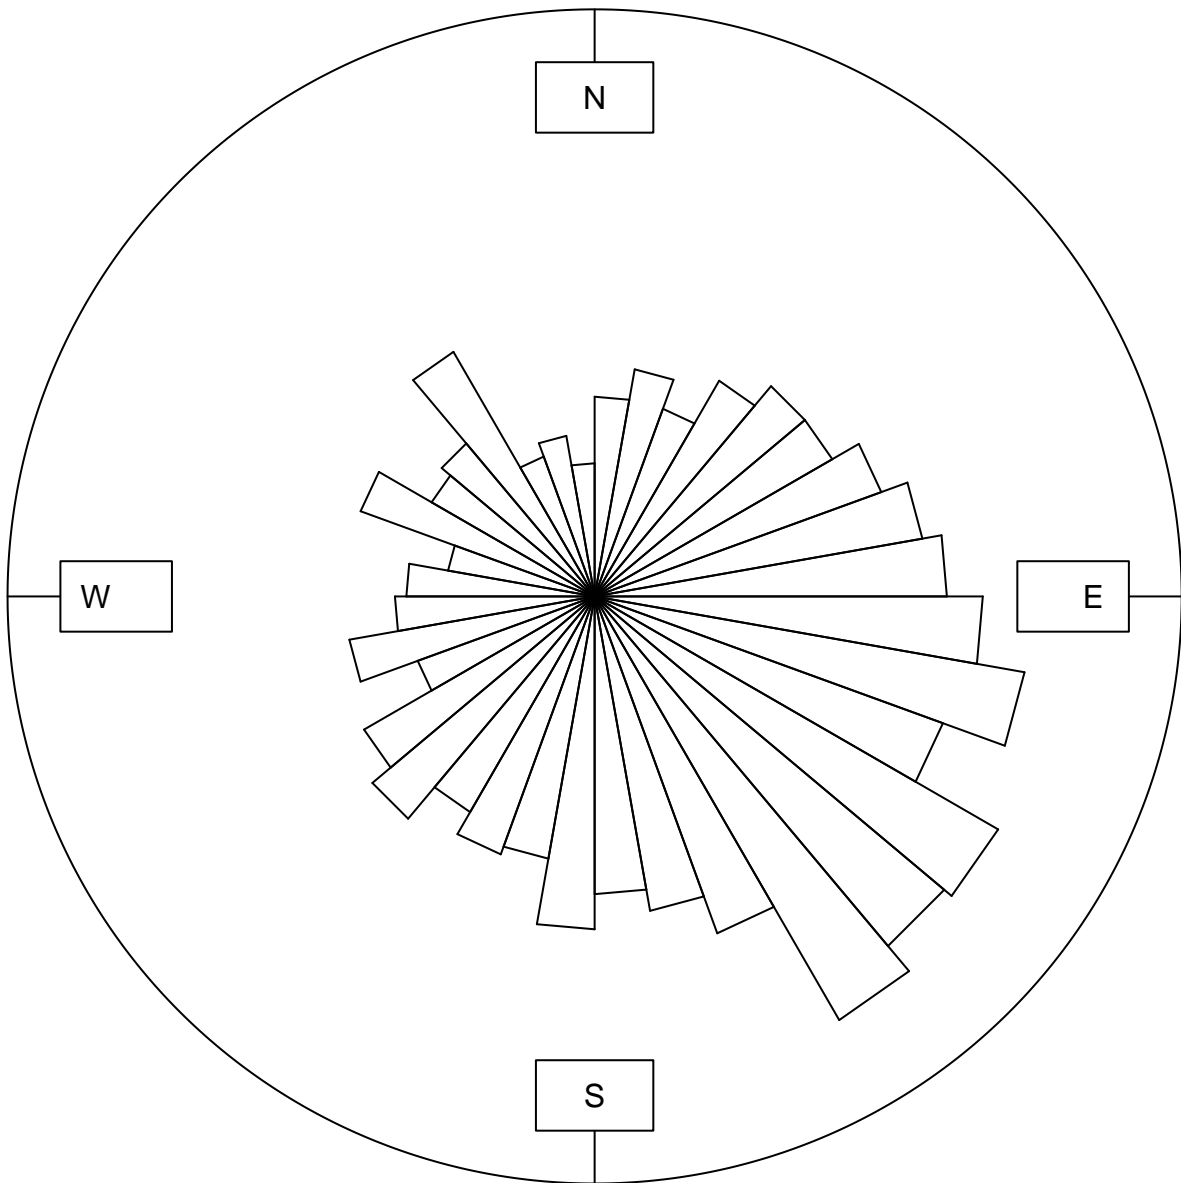

# bootstrap 717

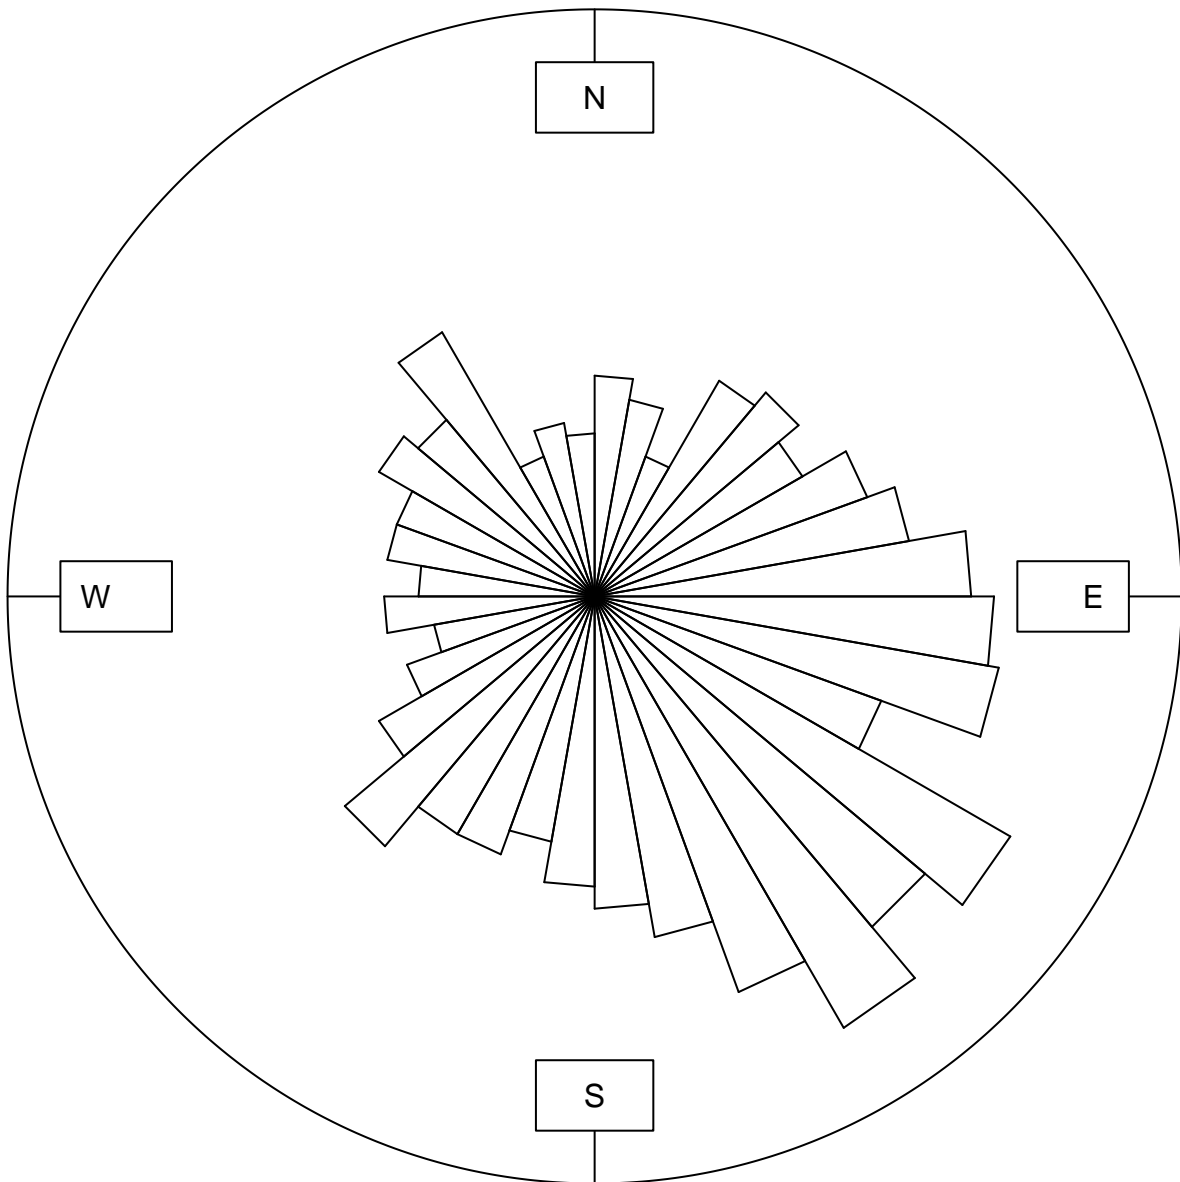

# bootstrap 718

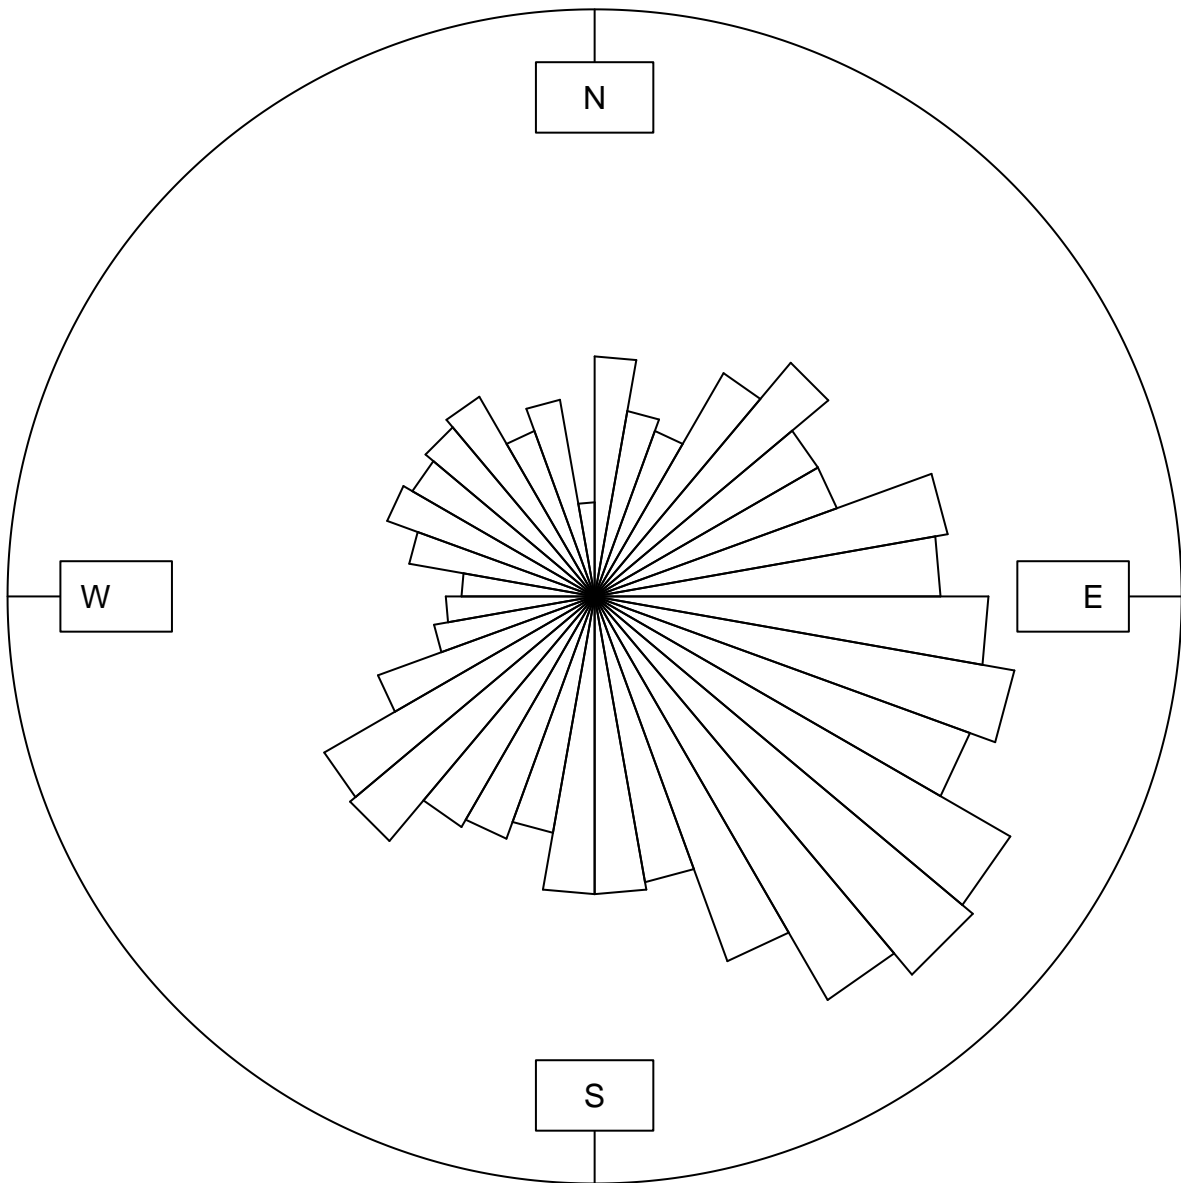

# bootstrap 719

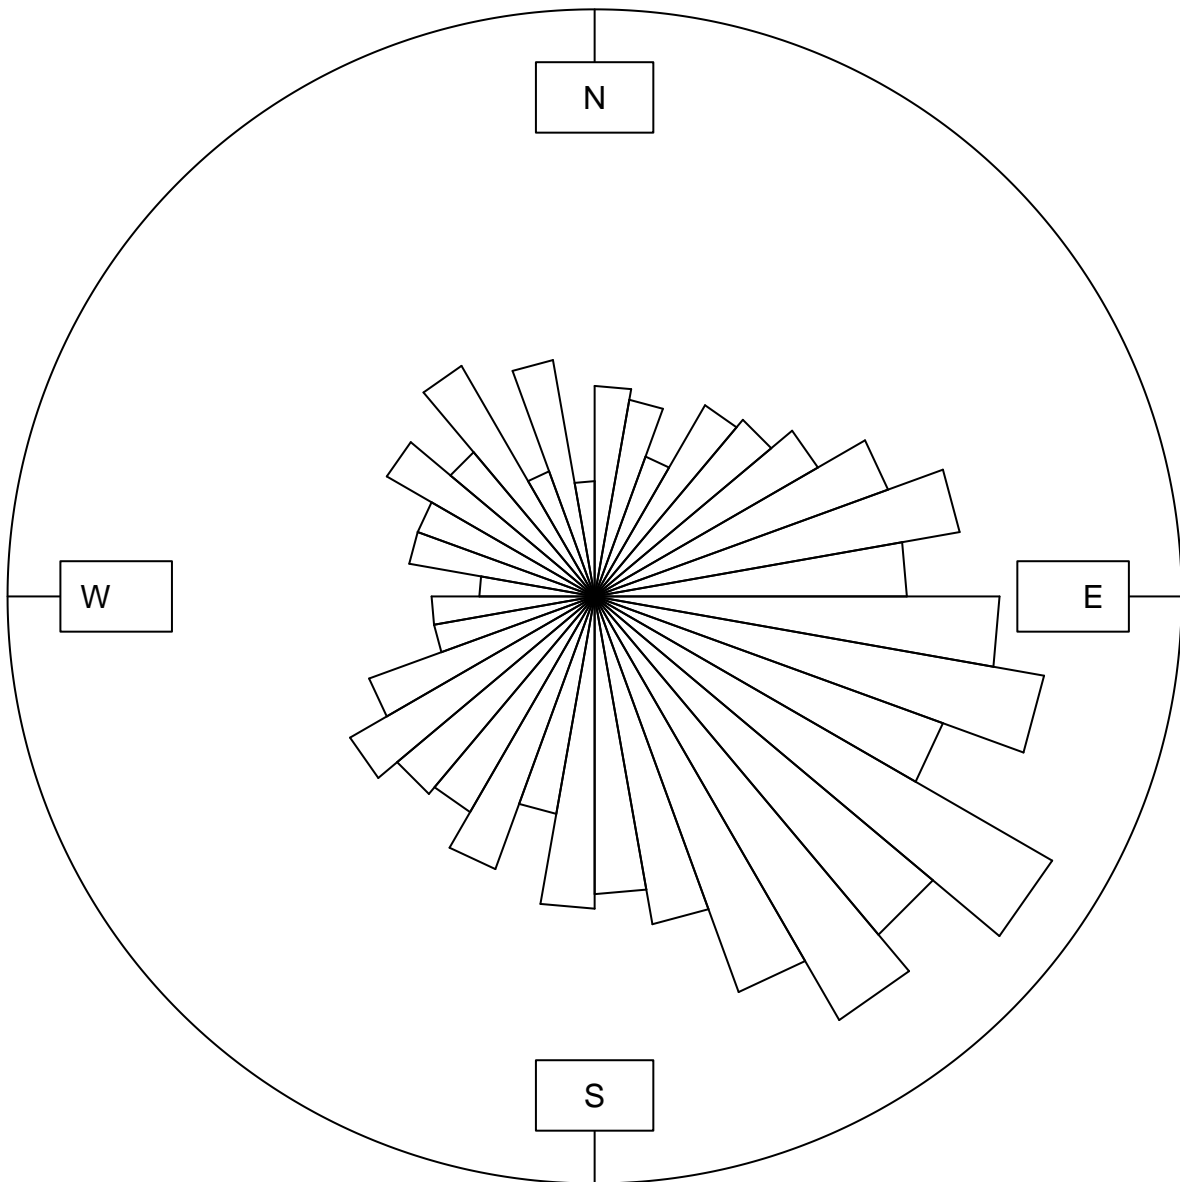

# bootstrap 720

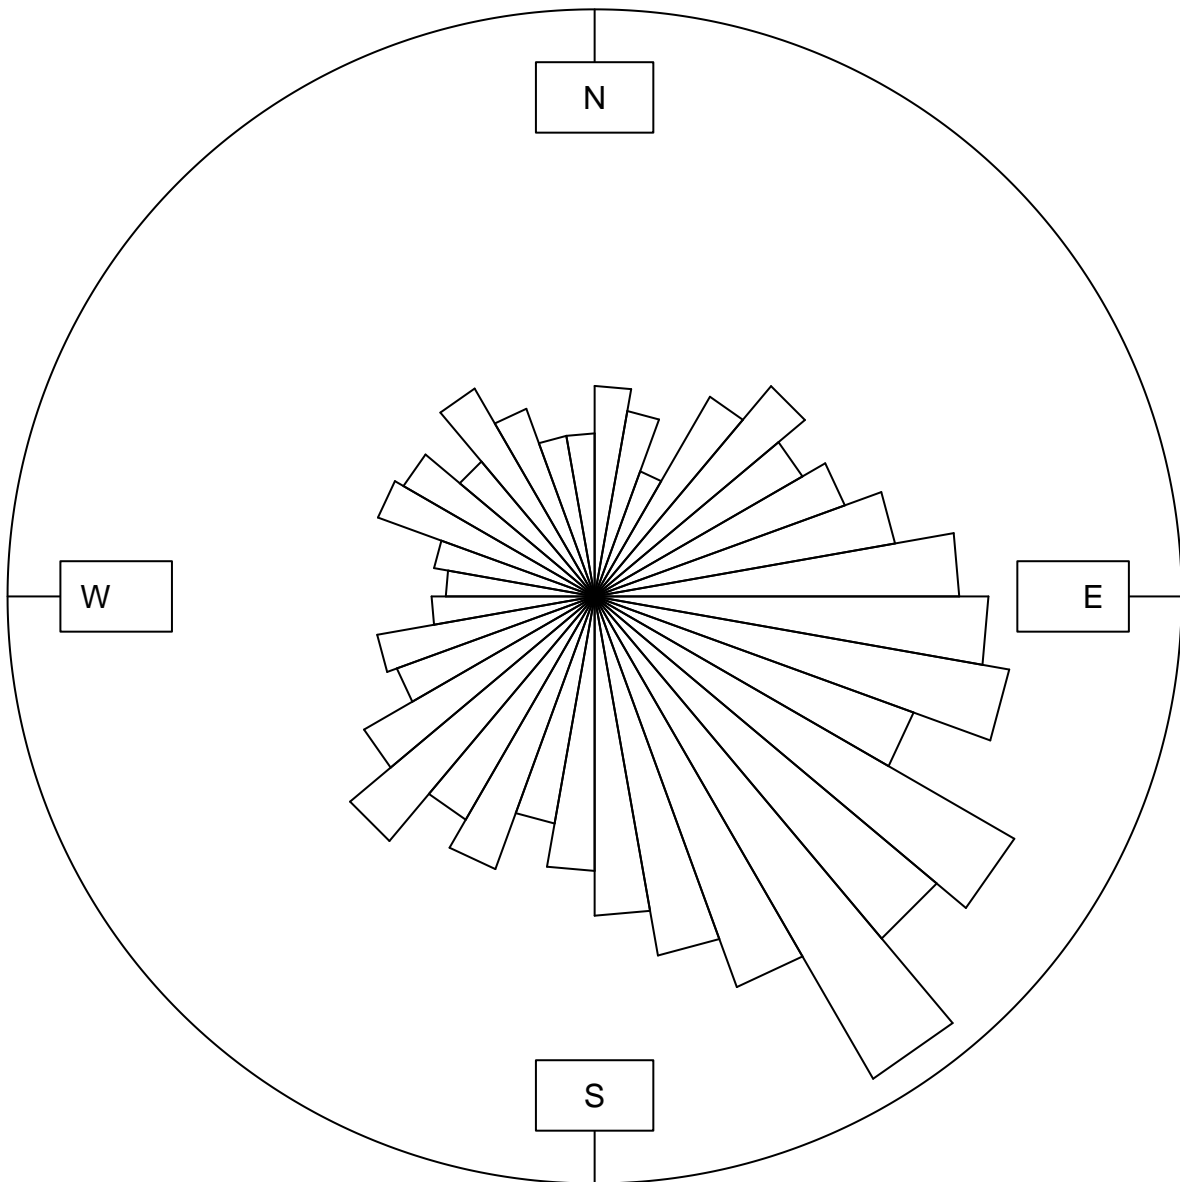



# bootstrap 721

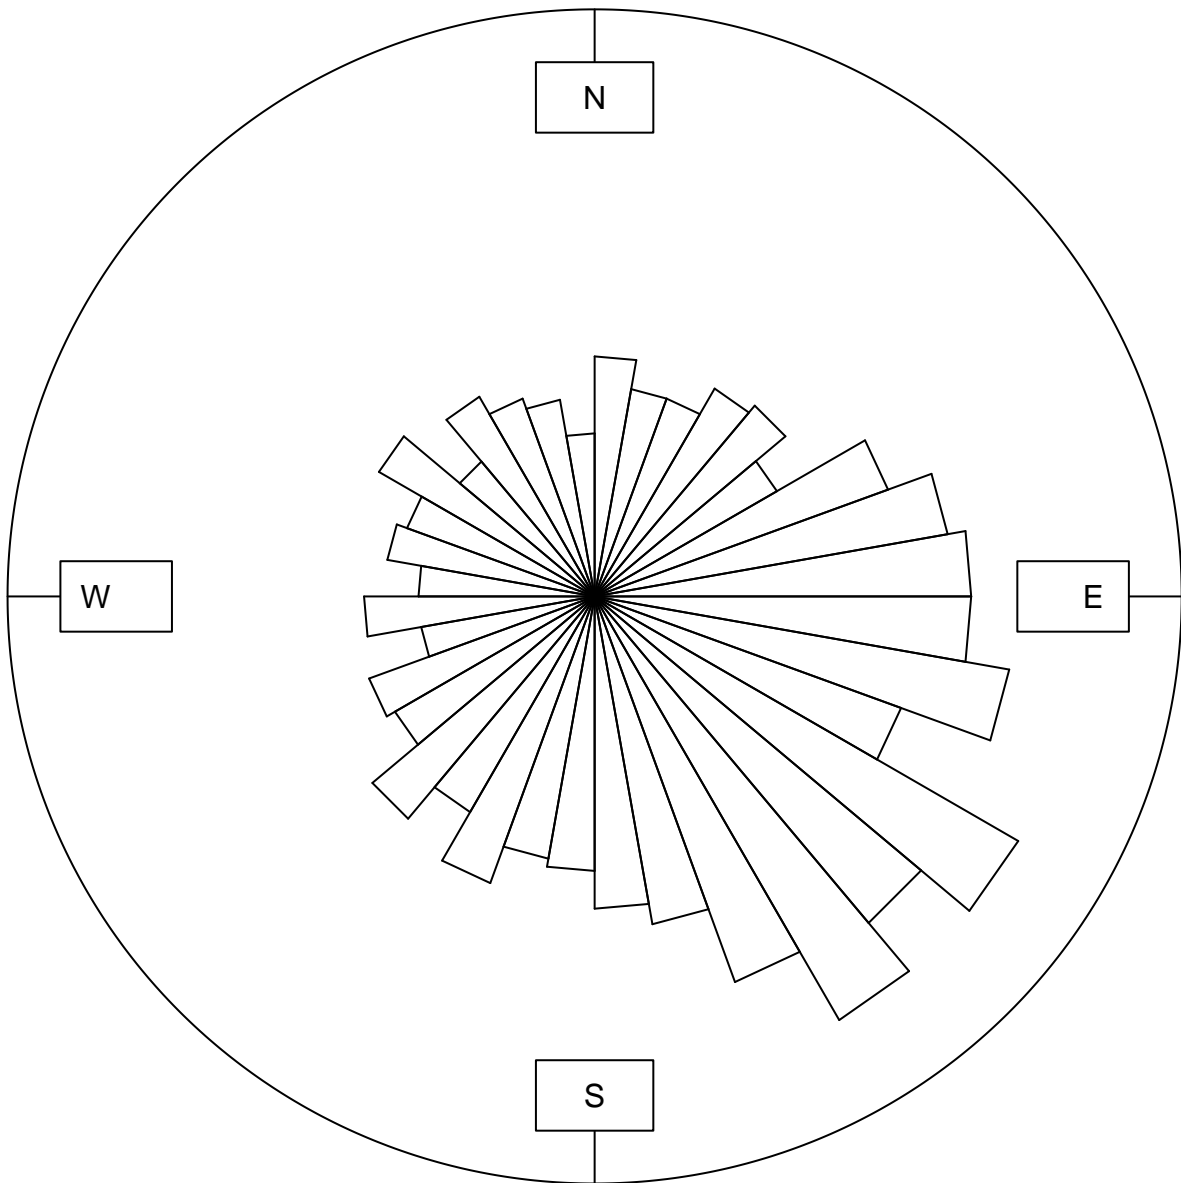

# bootstrap 722

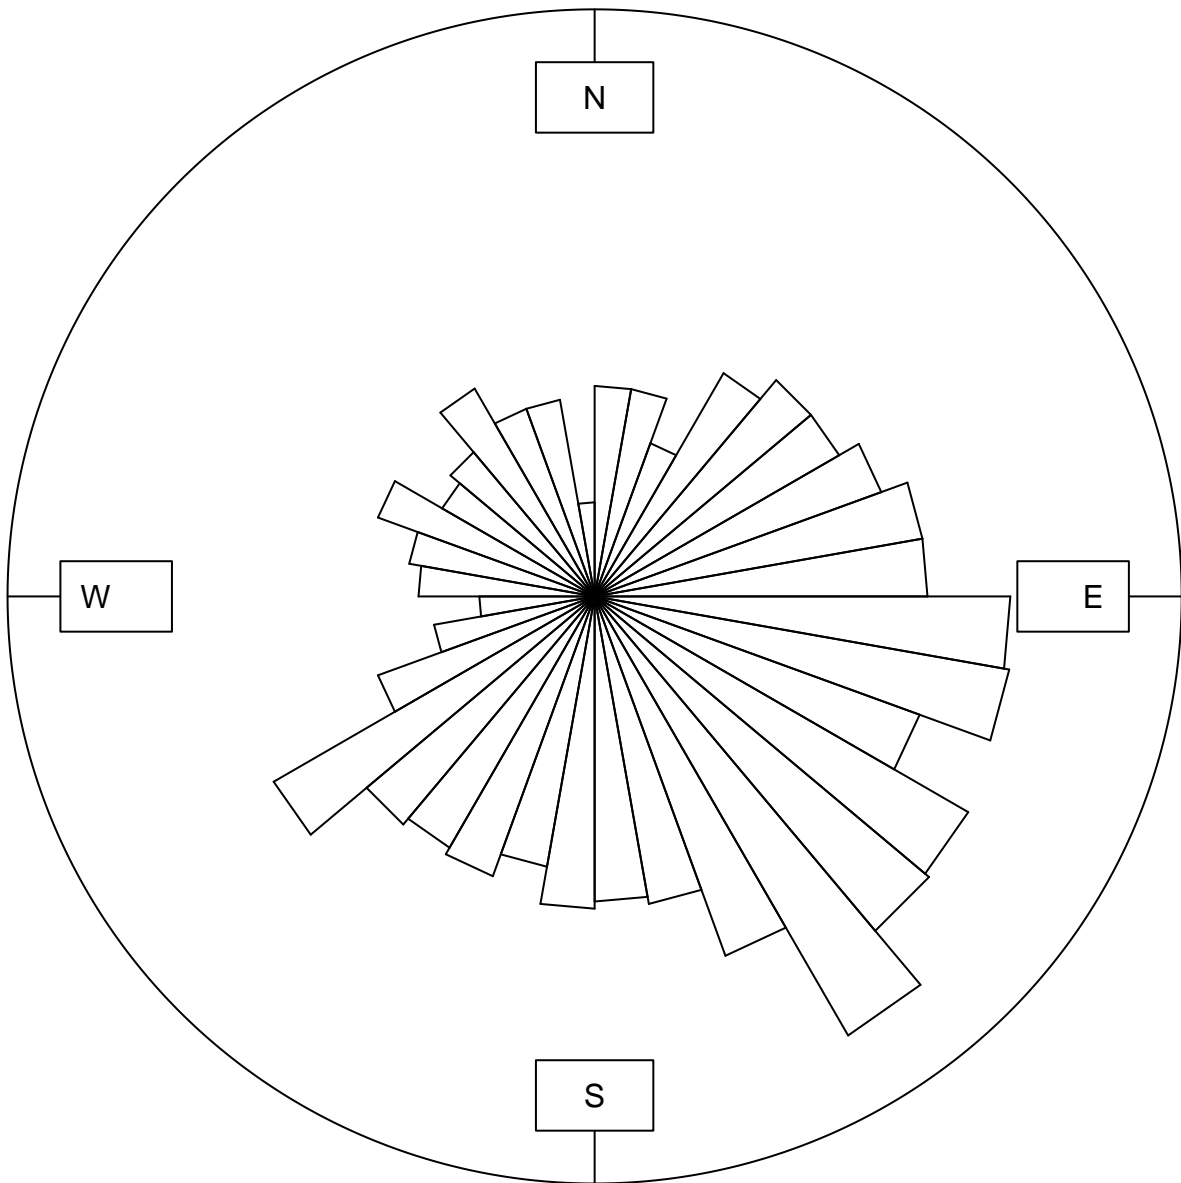

# bootstrap 723

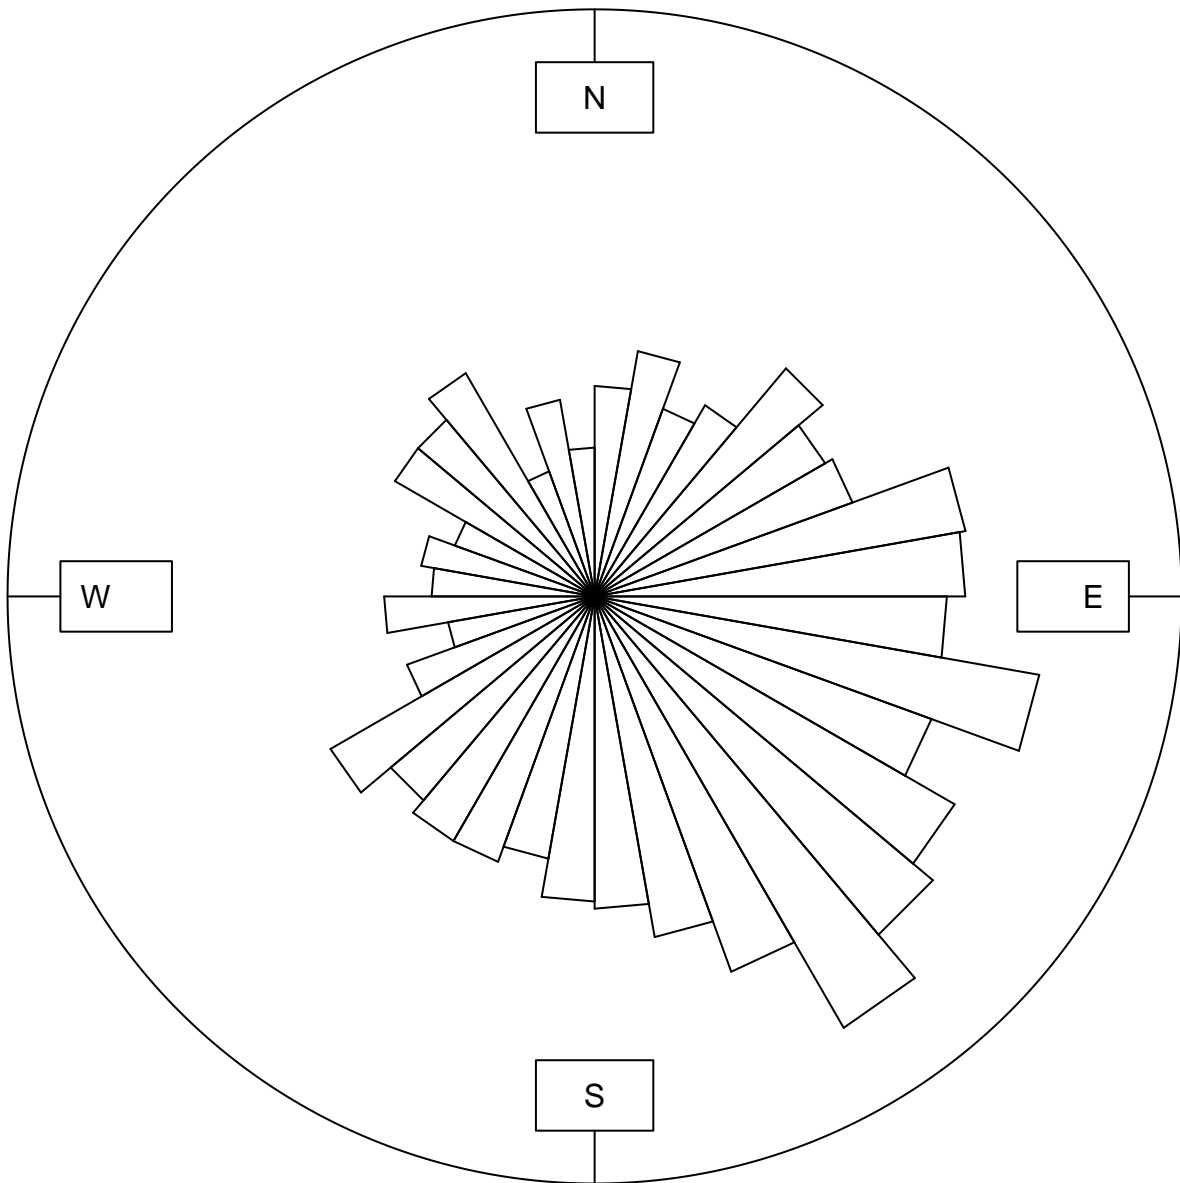

# bootstrap 724

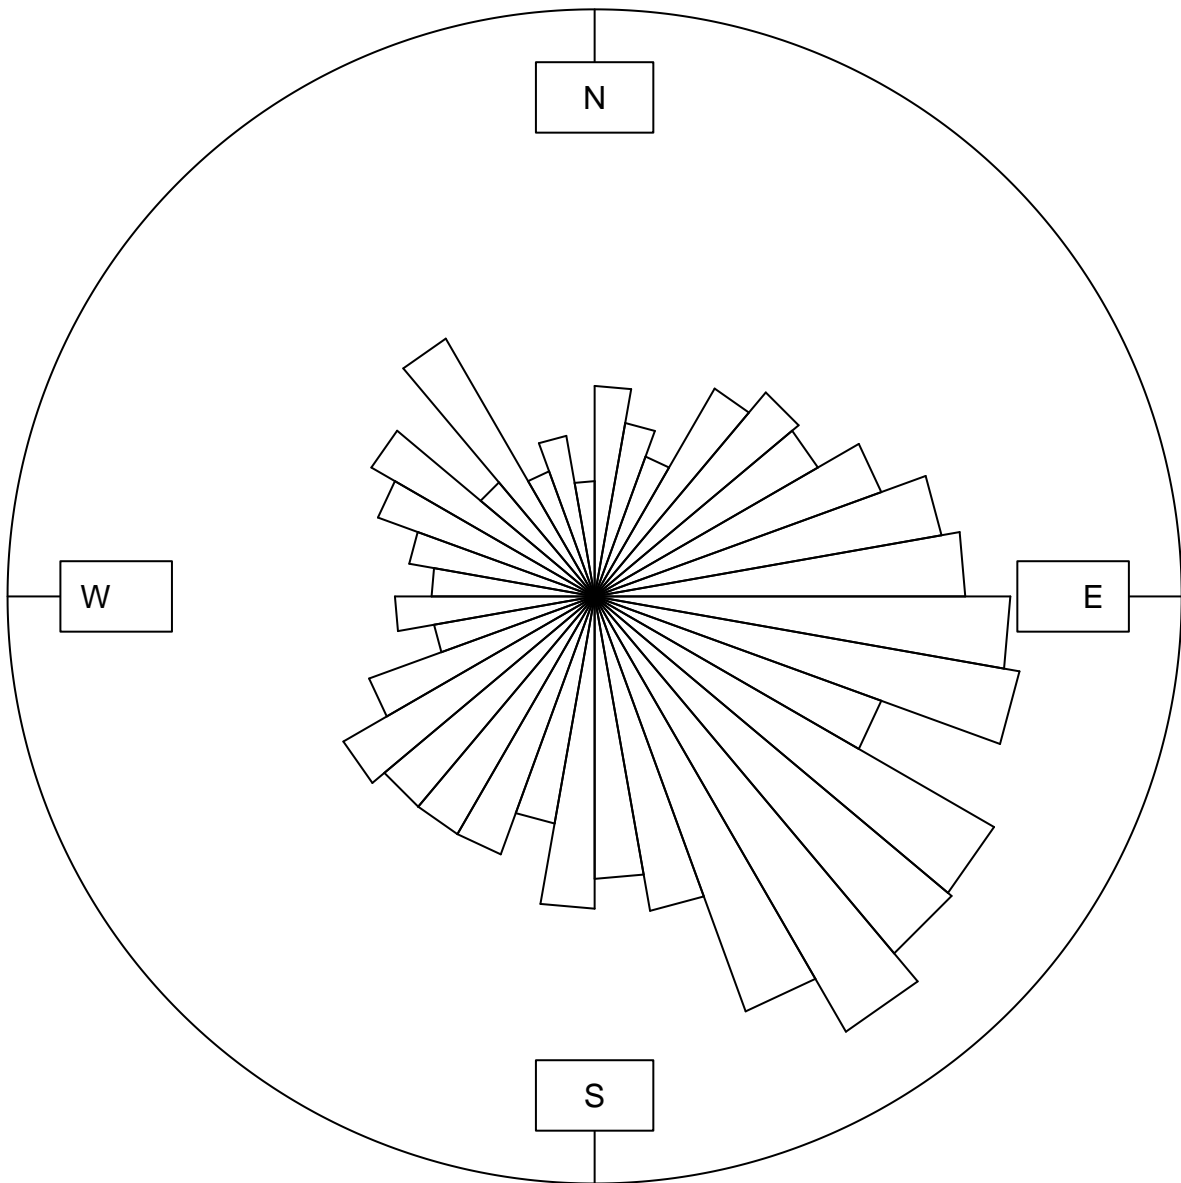

# bootstrap 725

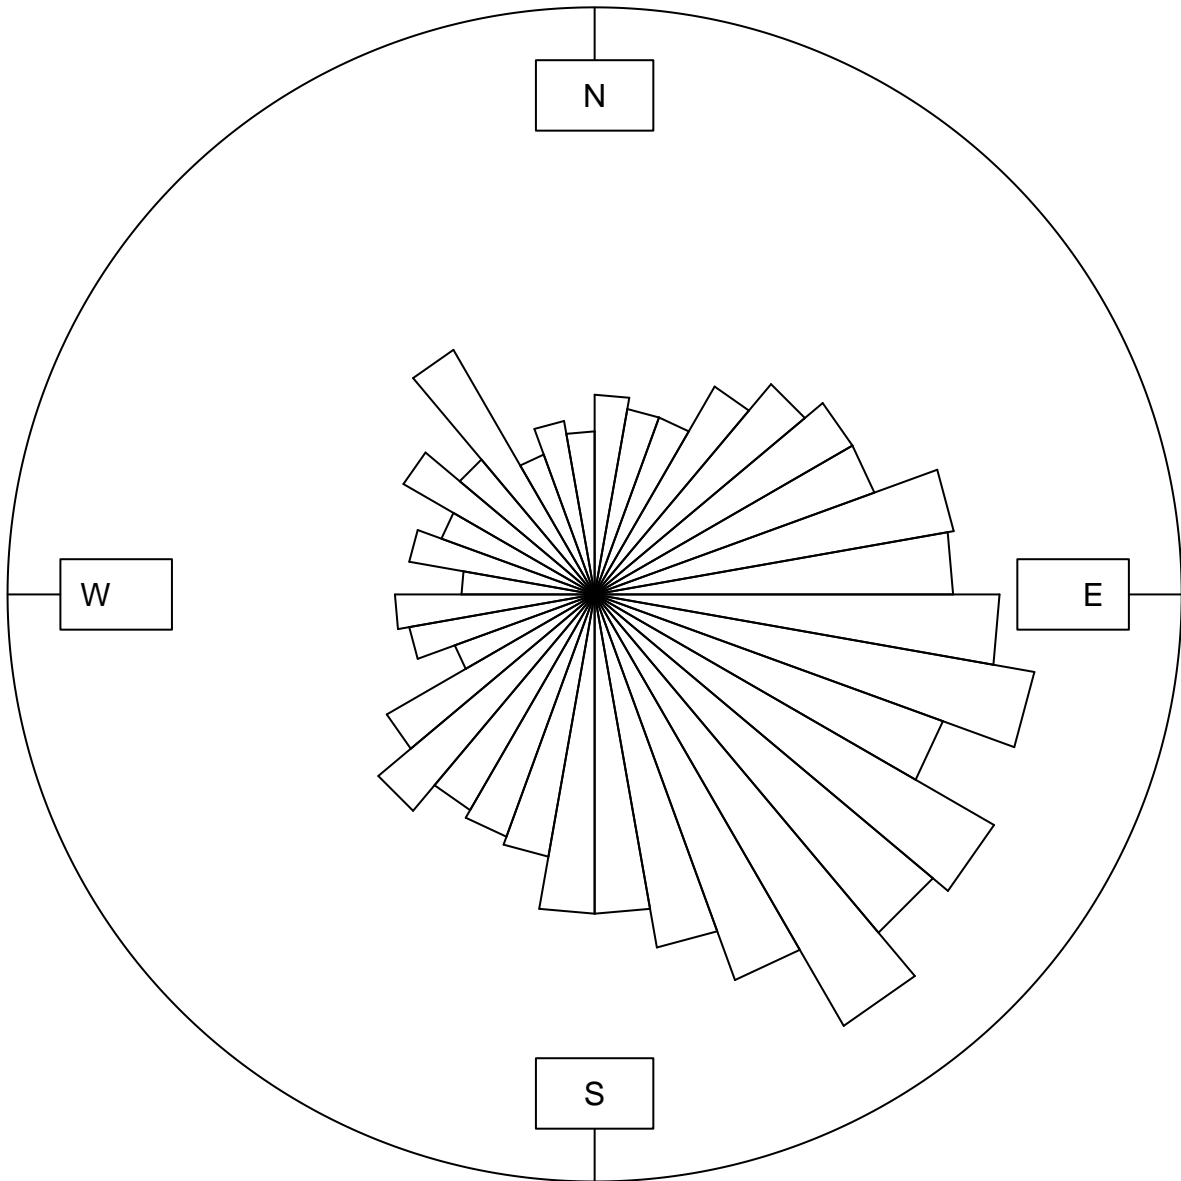

# bootstrap 726

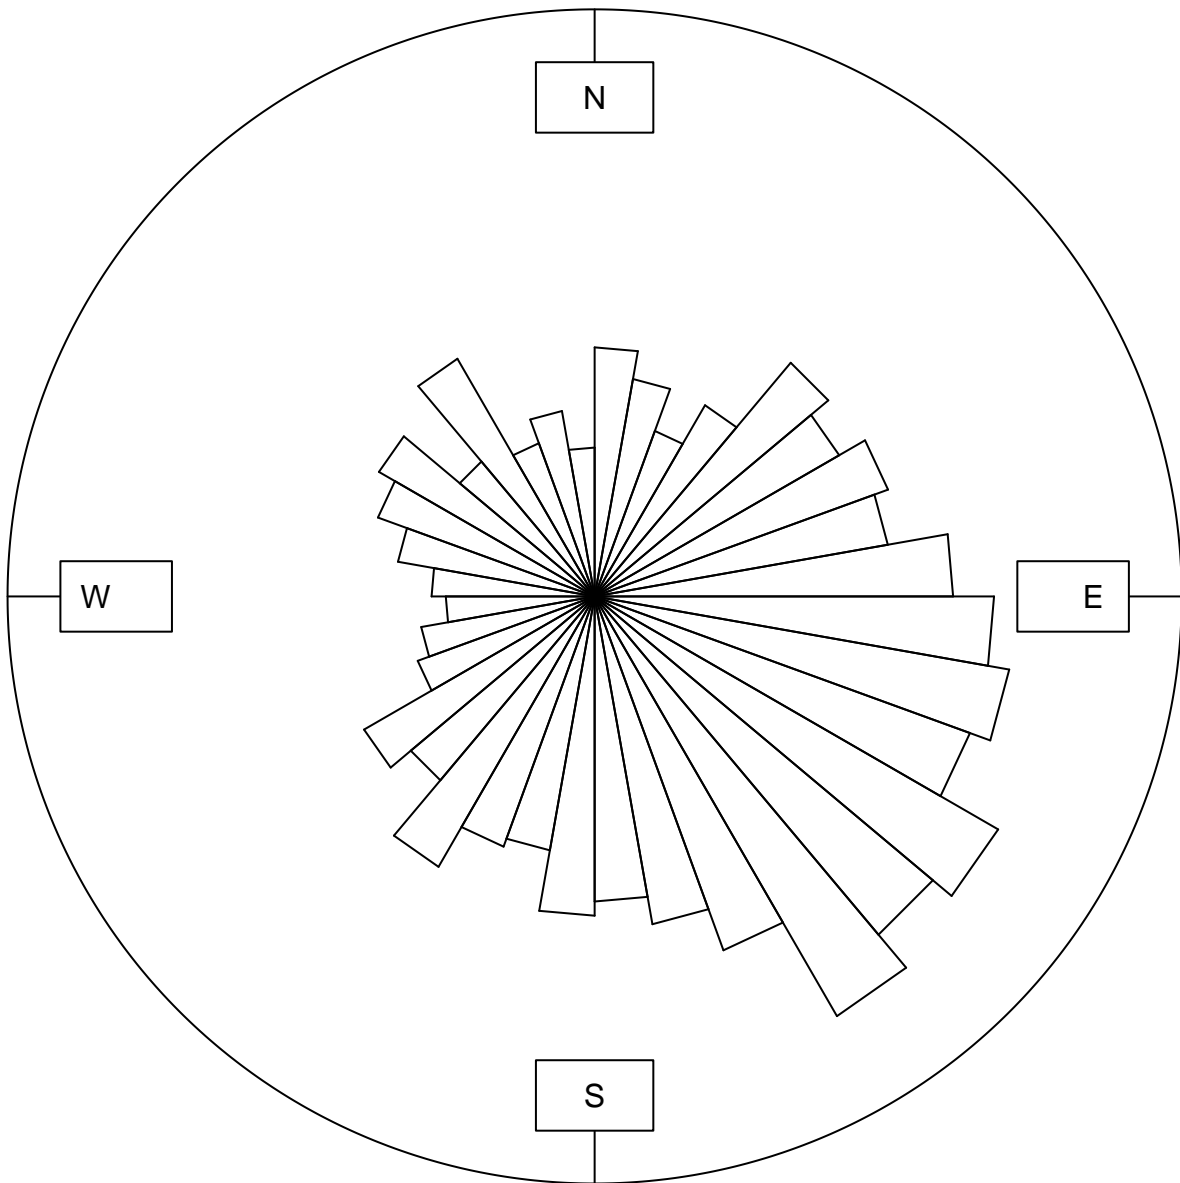

# bootstrap 727

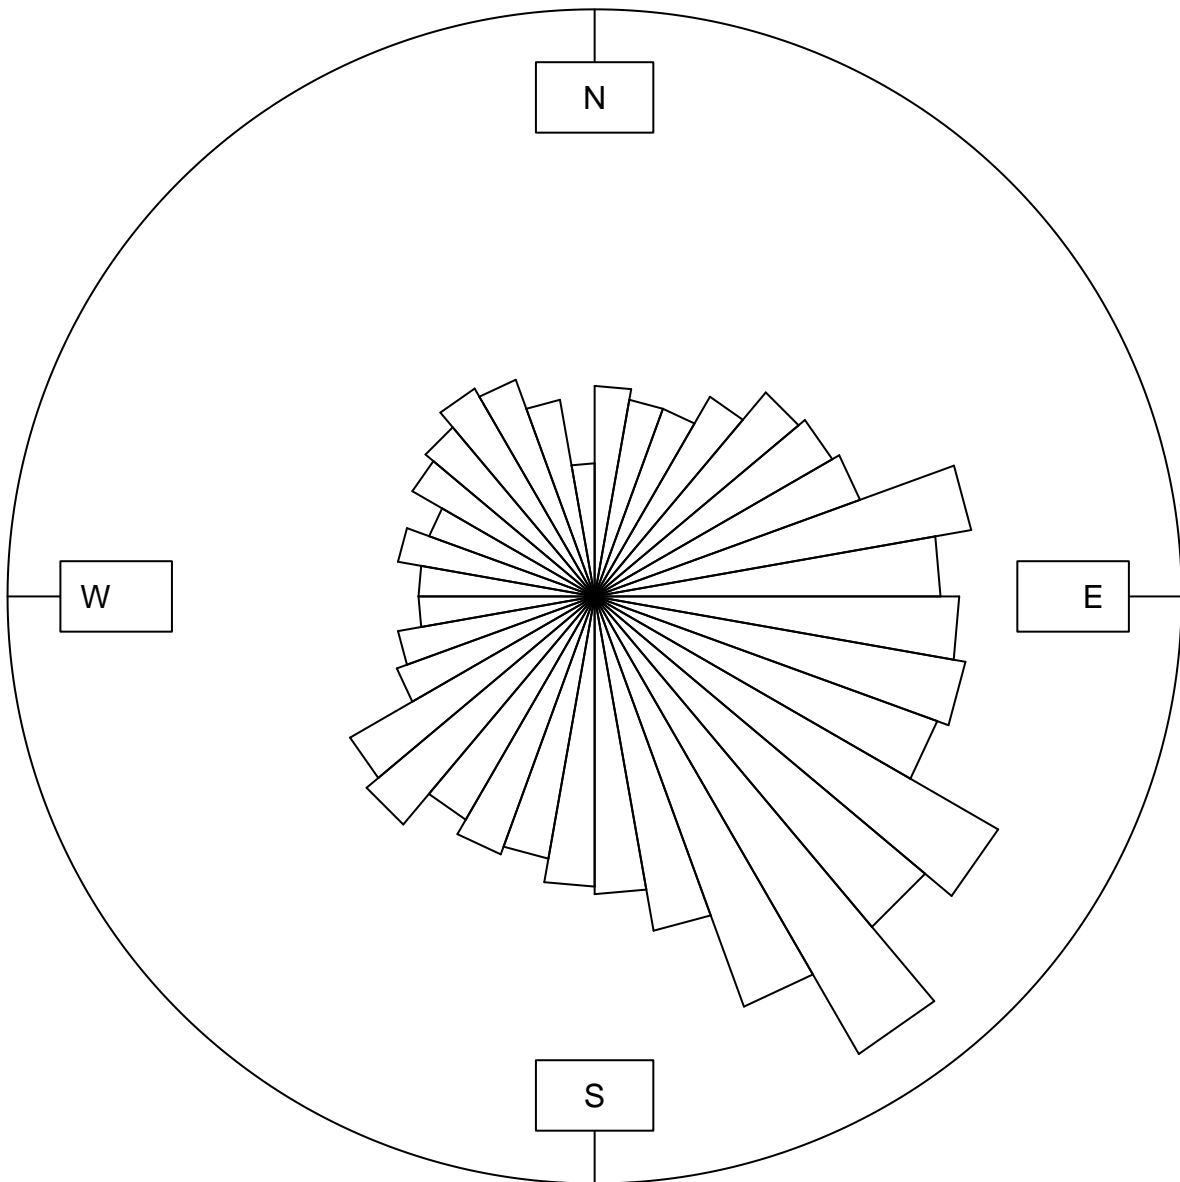

# bootstrap 728

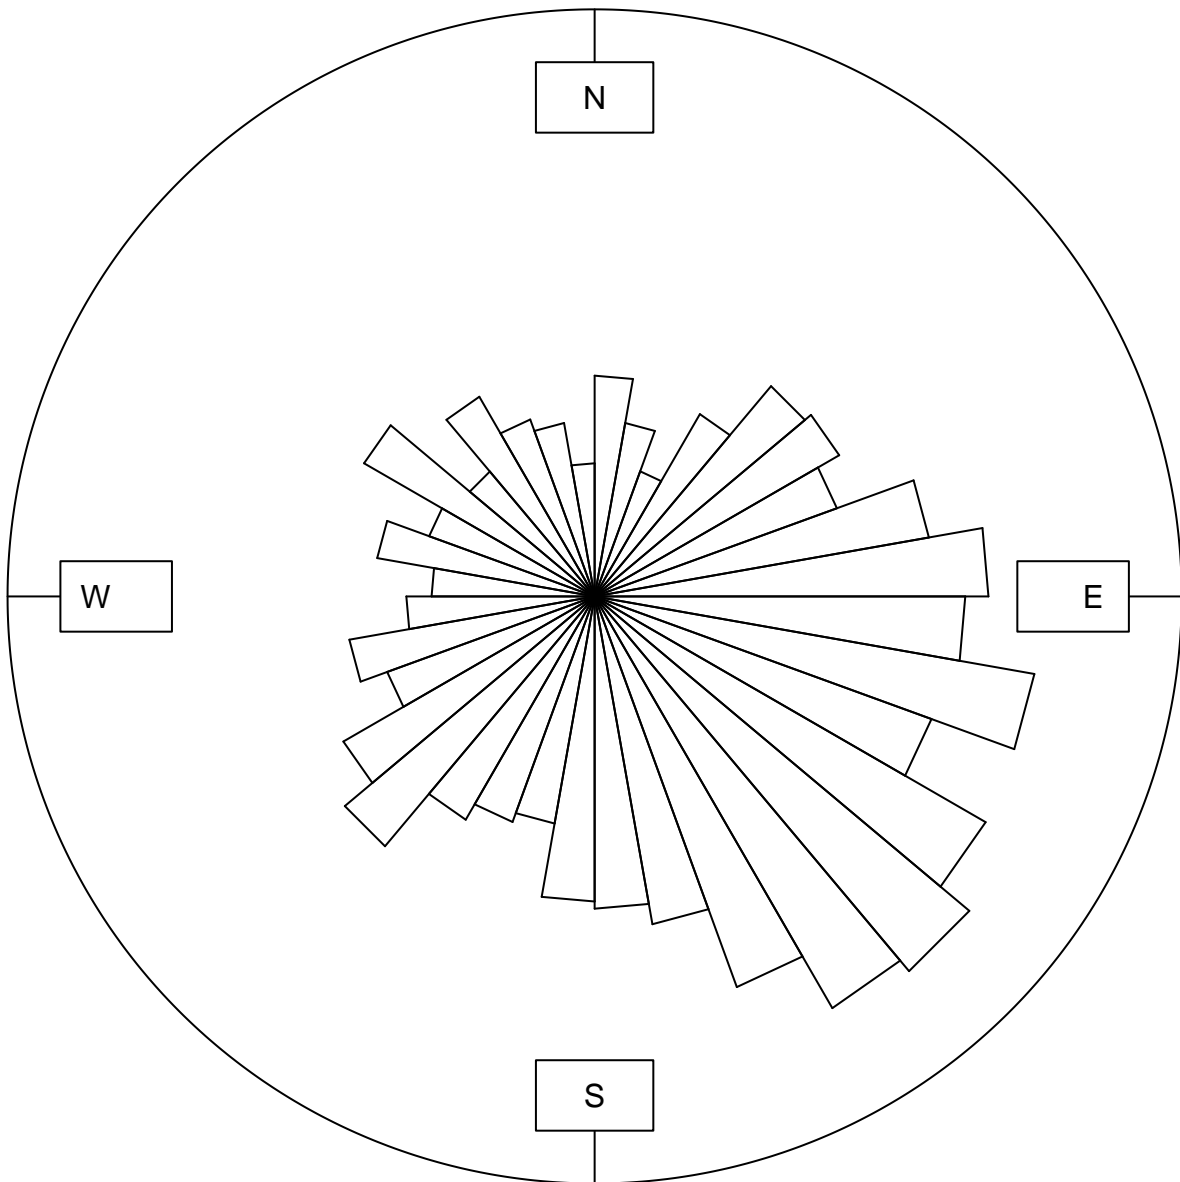



# bootstrap 729

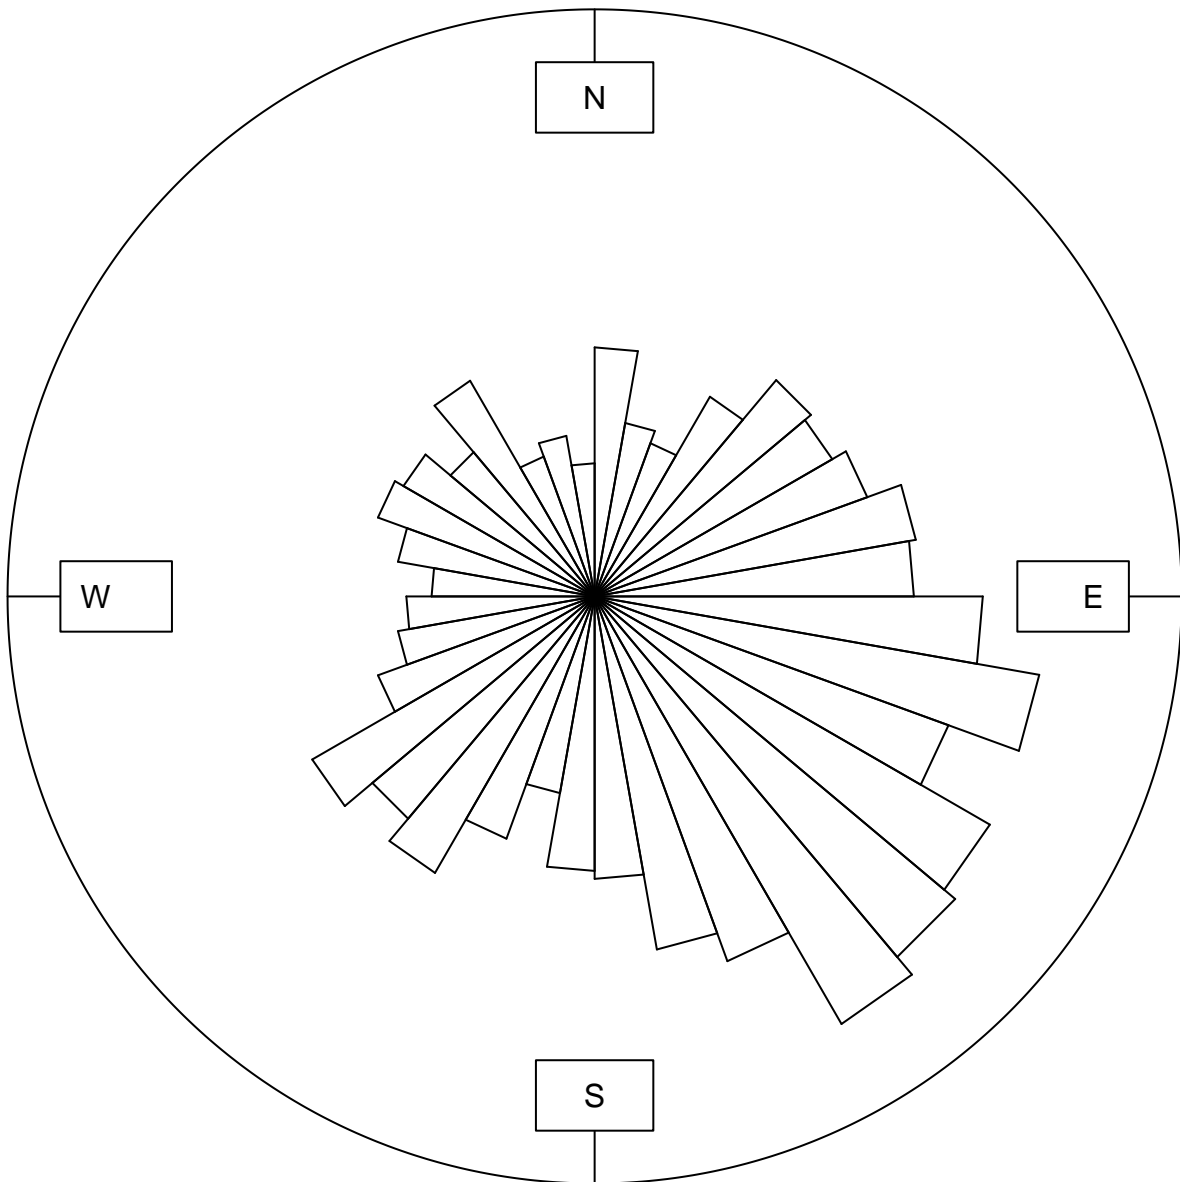

# bootstrap 730

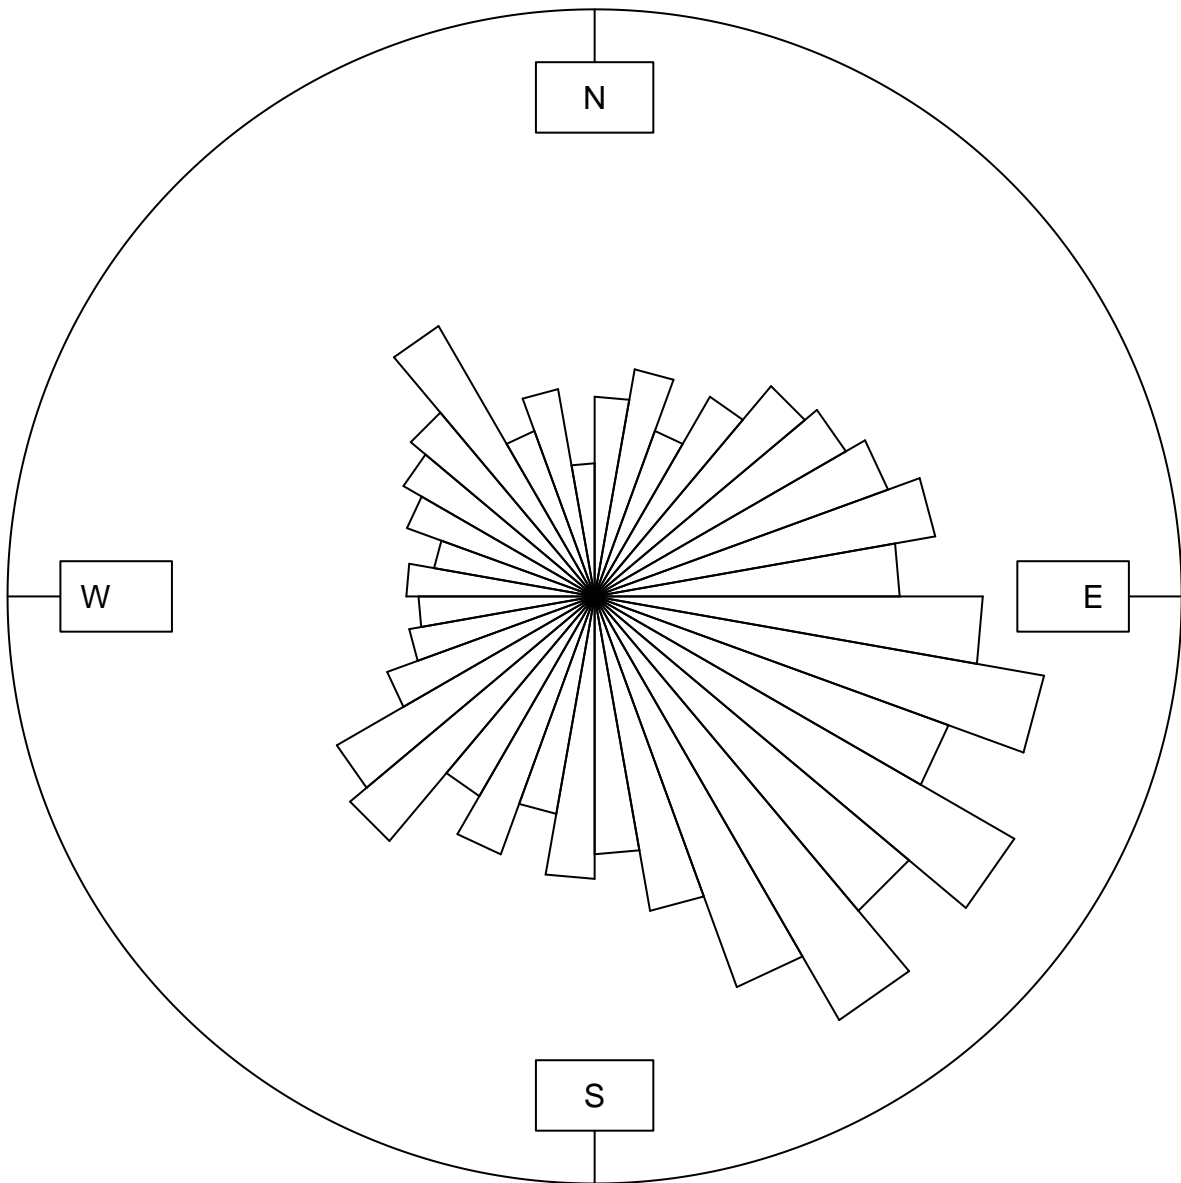

# bootstrap 731

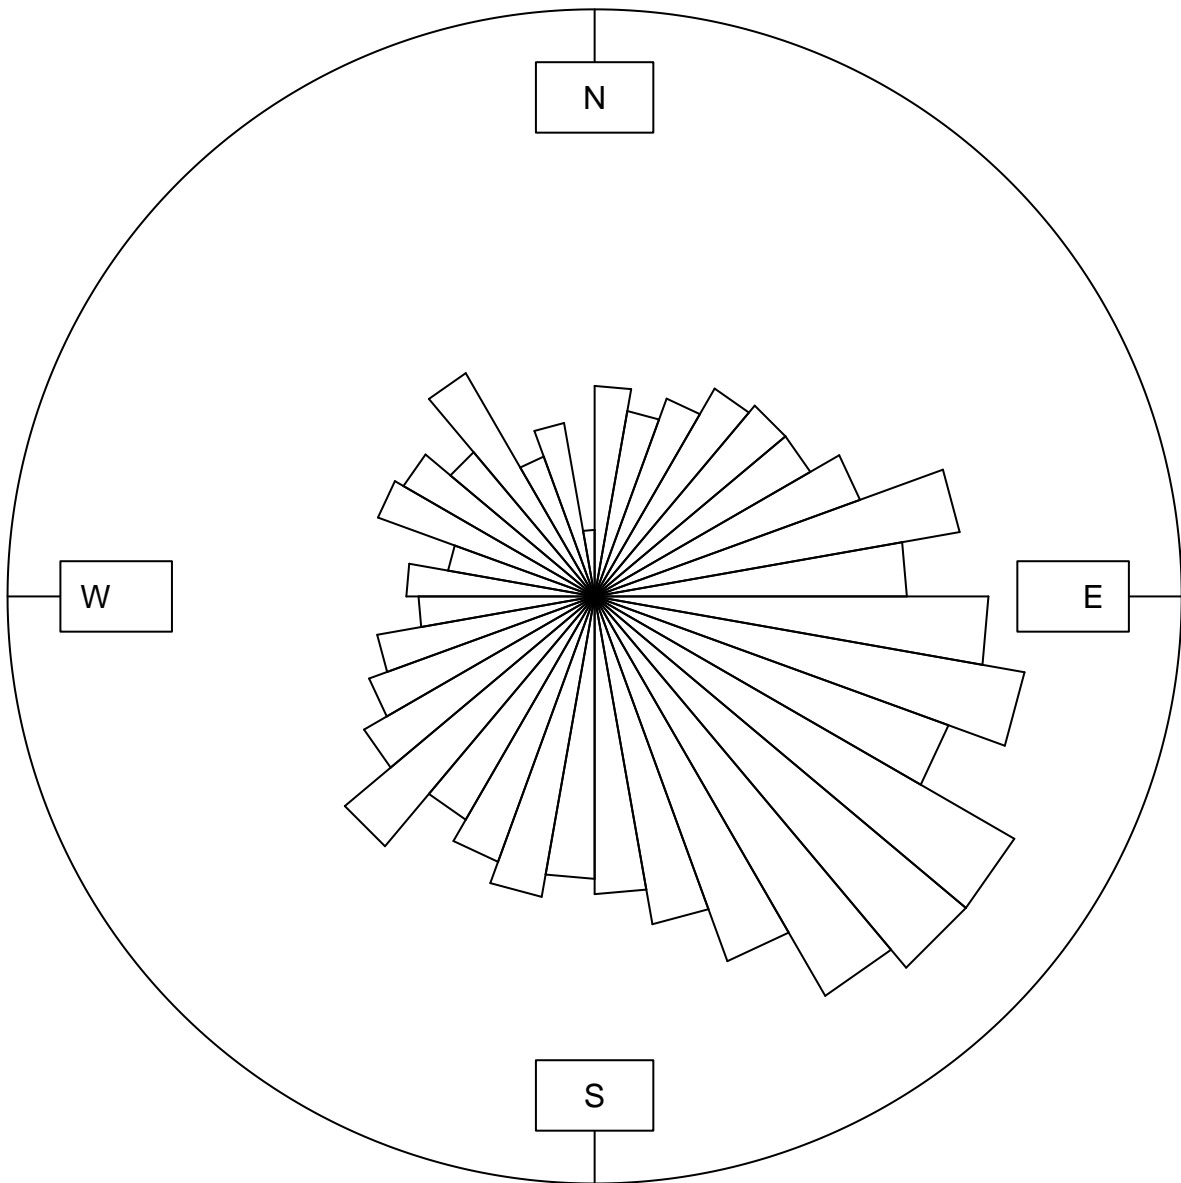

# bootstrap 732

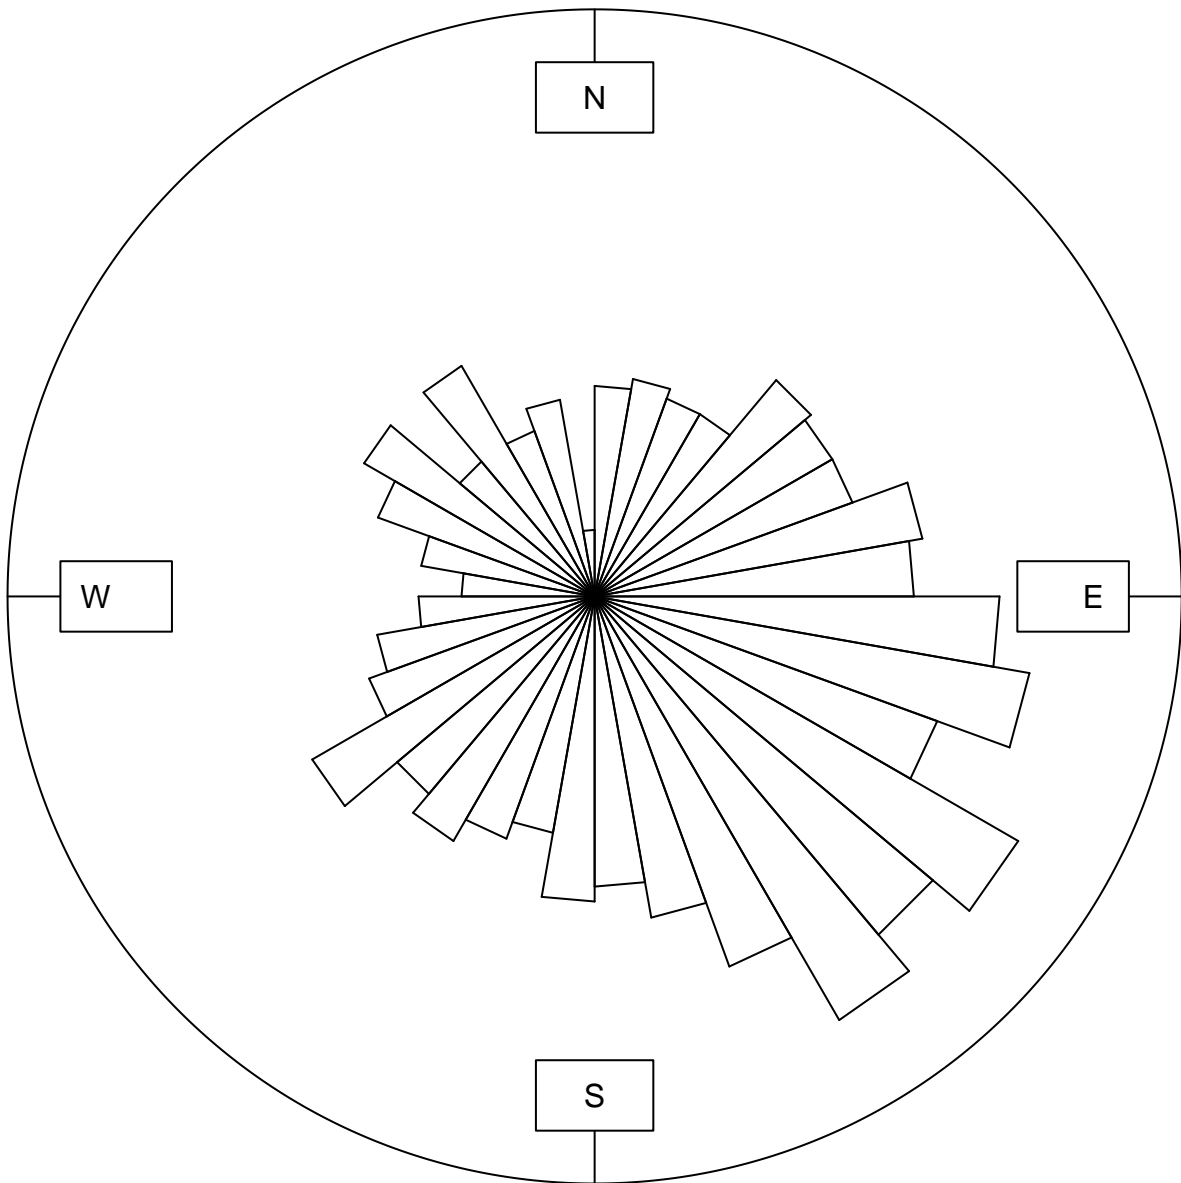

# bootstrap 733

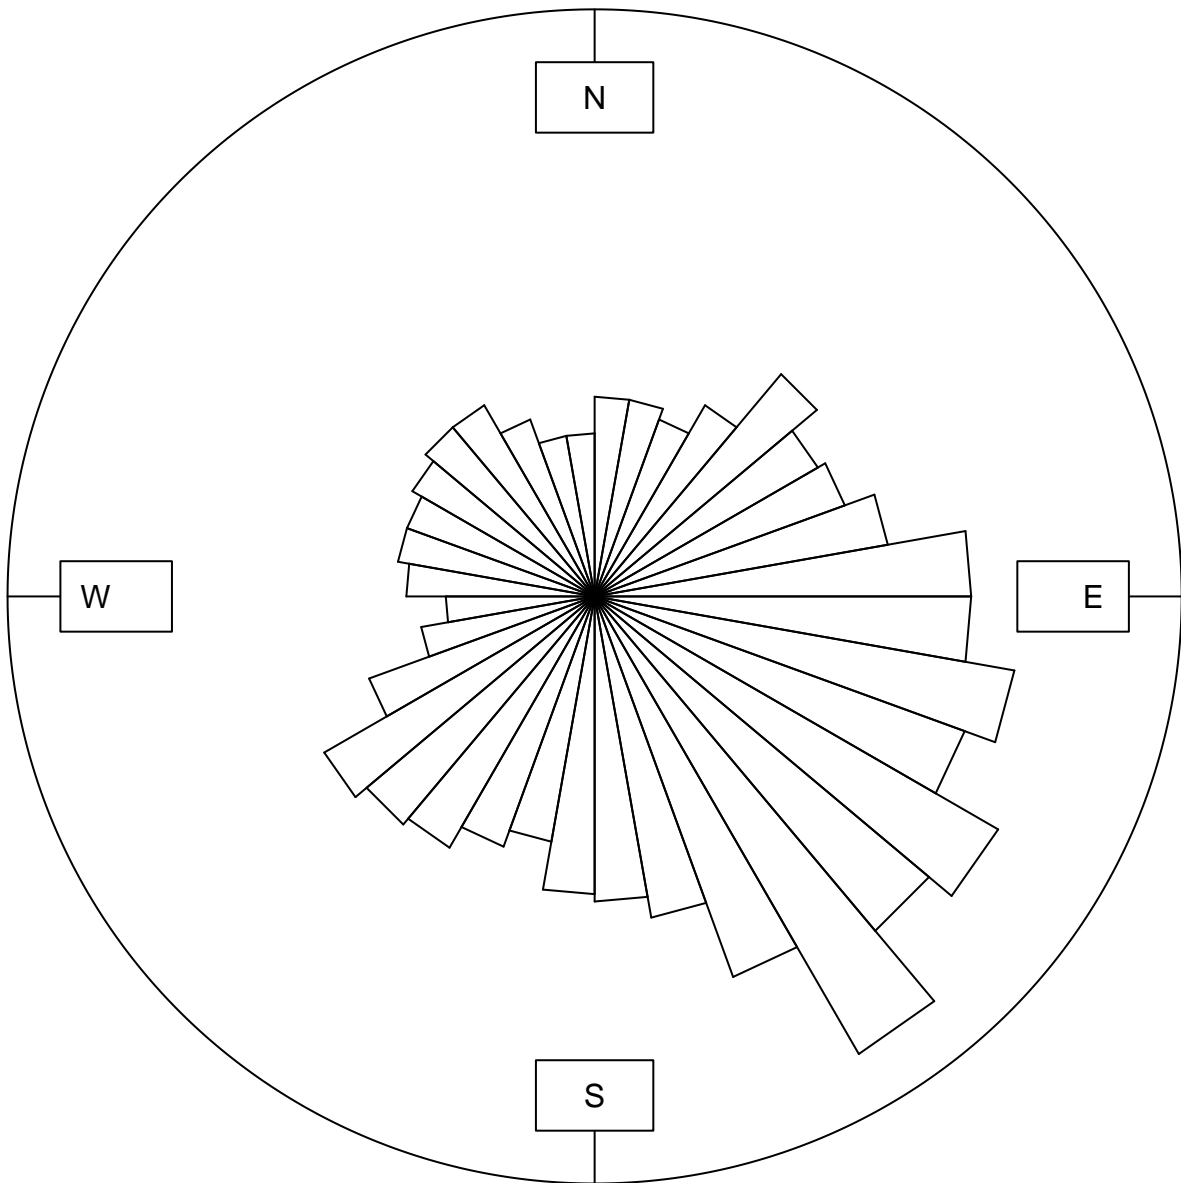

# bootstrap 734

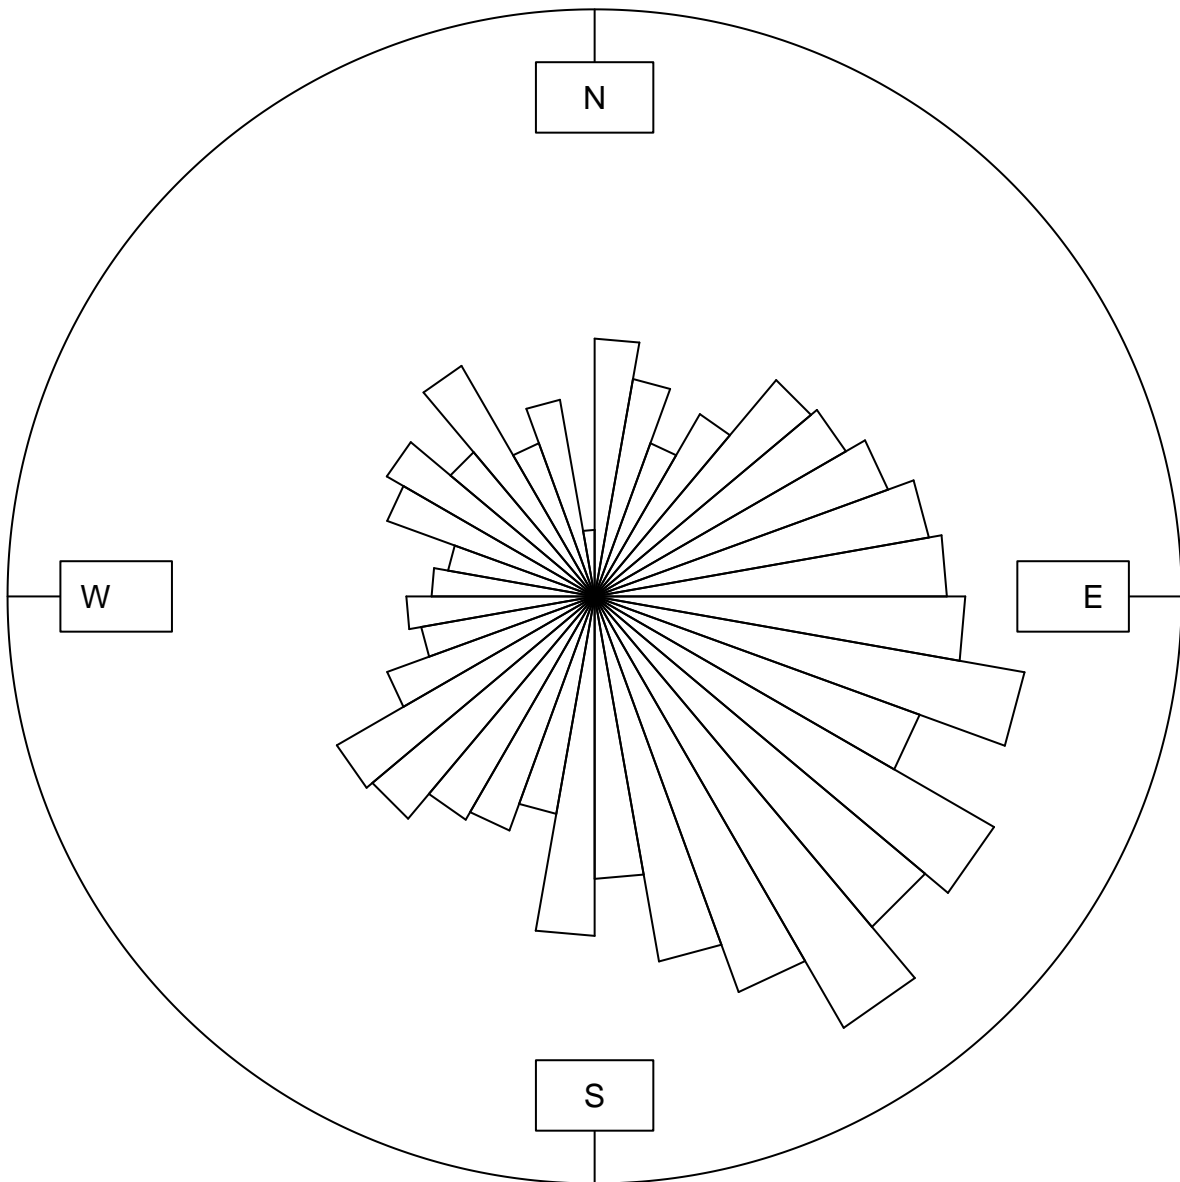

# bootstrap 735

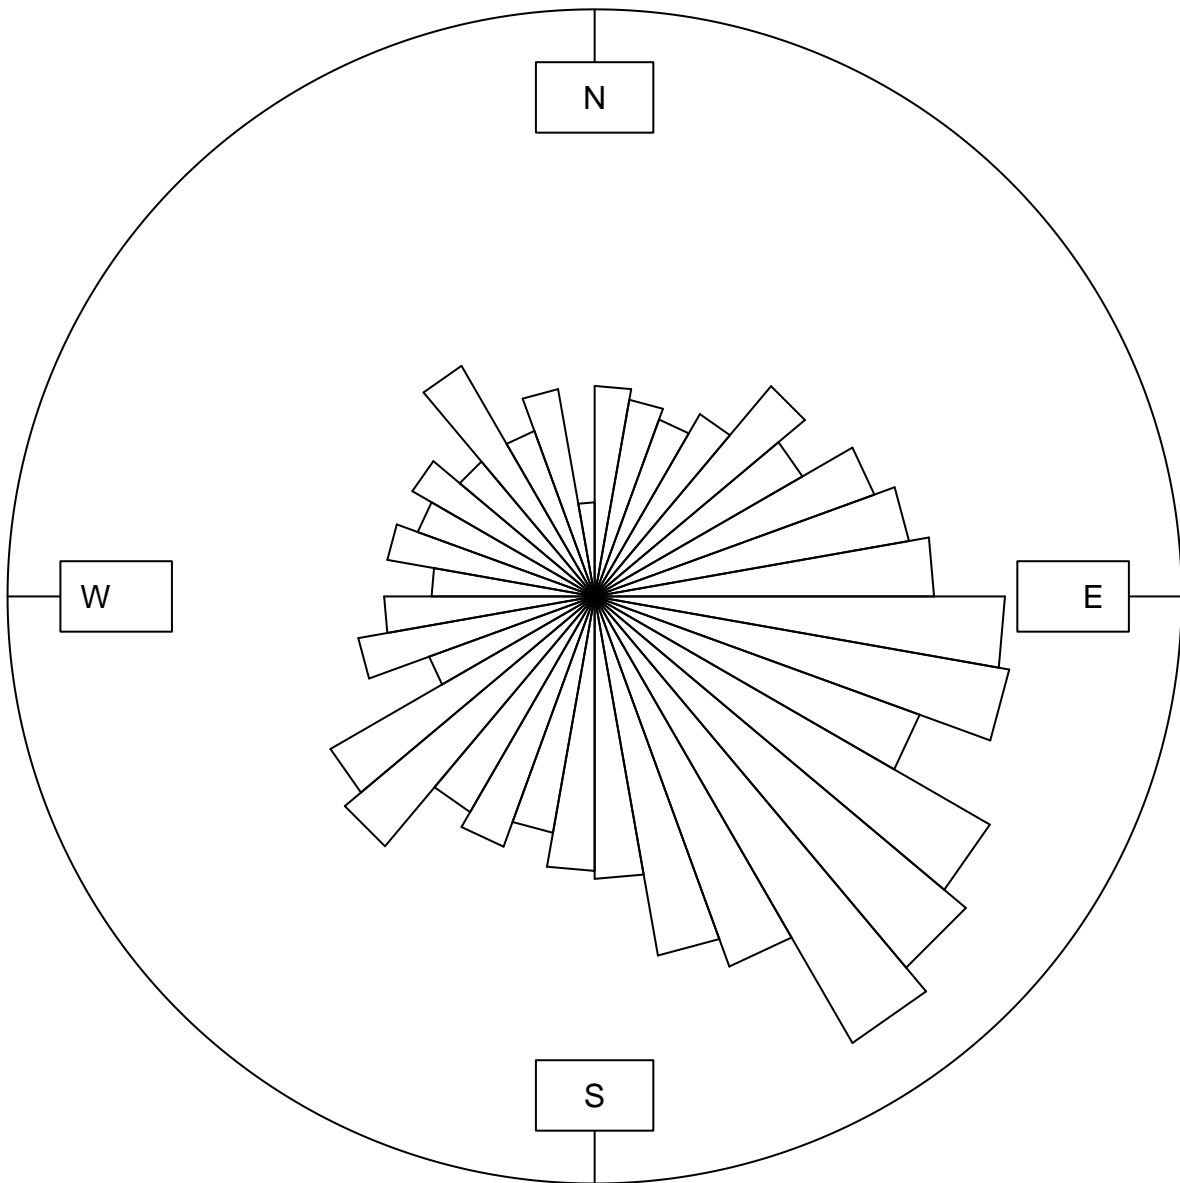

# bootstrap 736

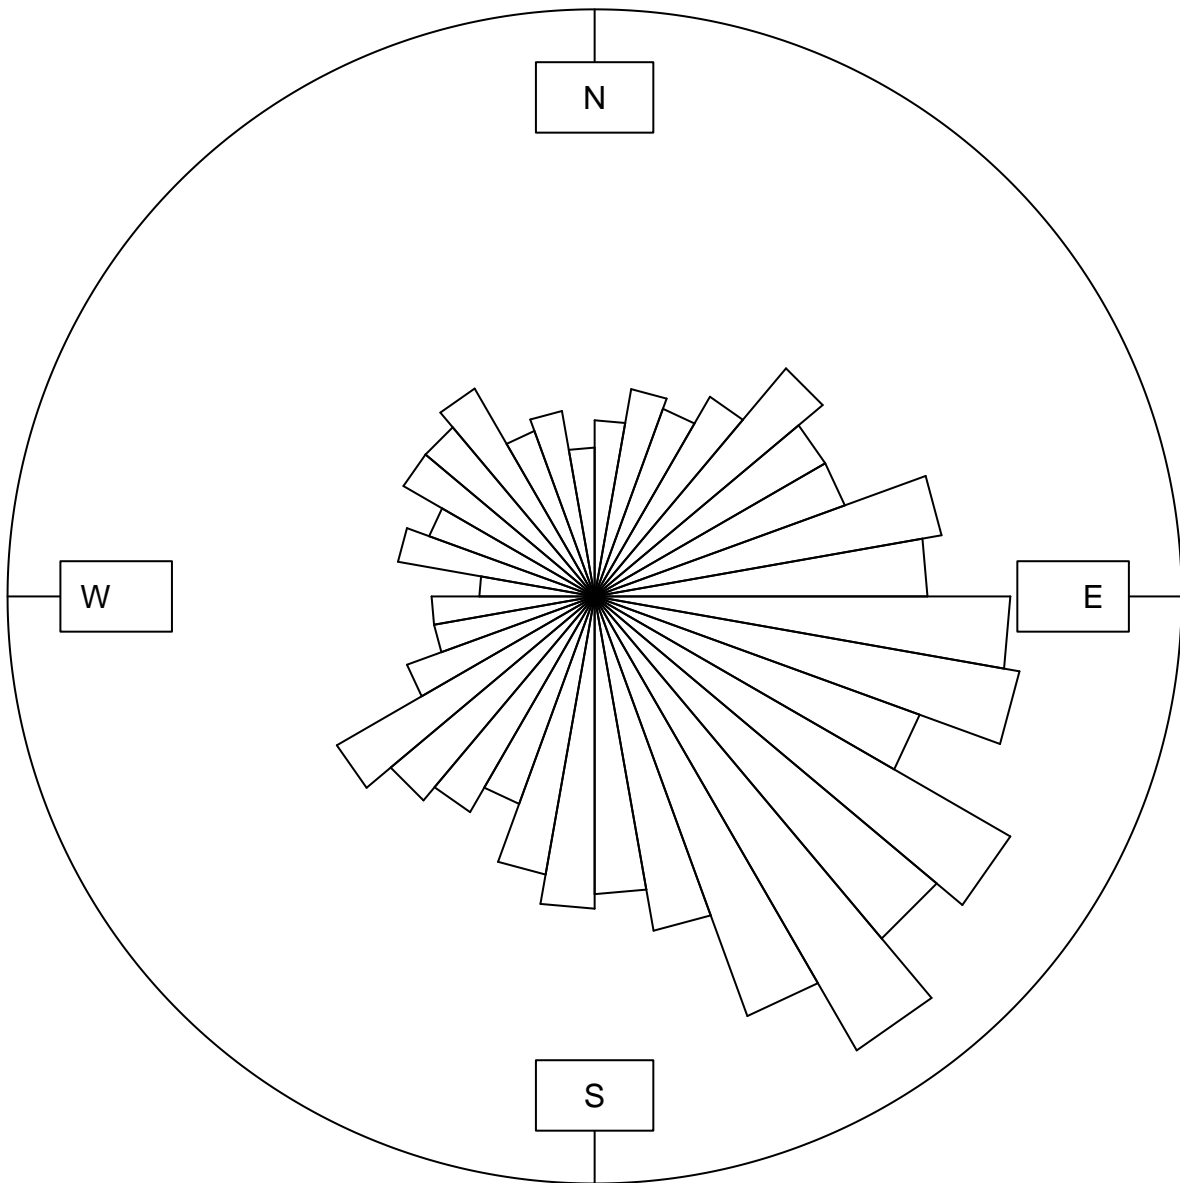



# bootstrap 737

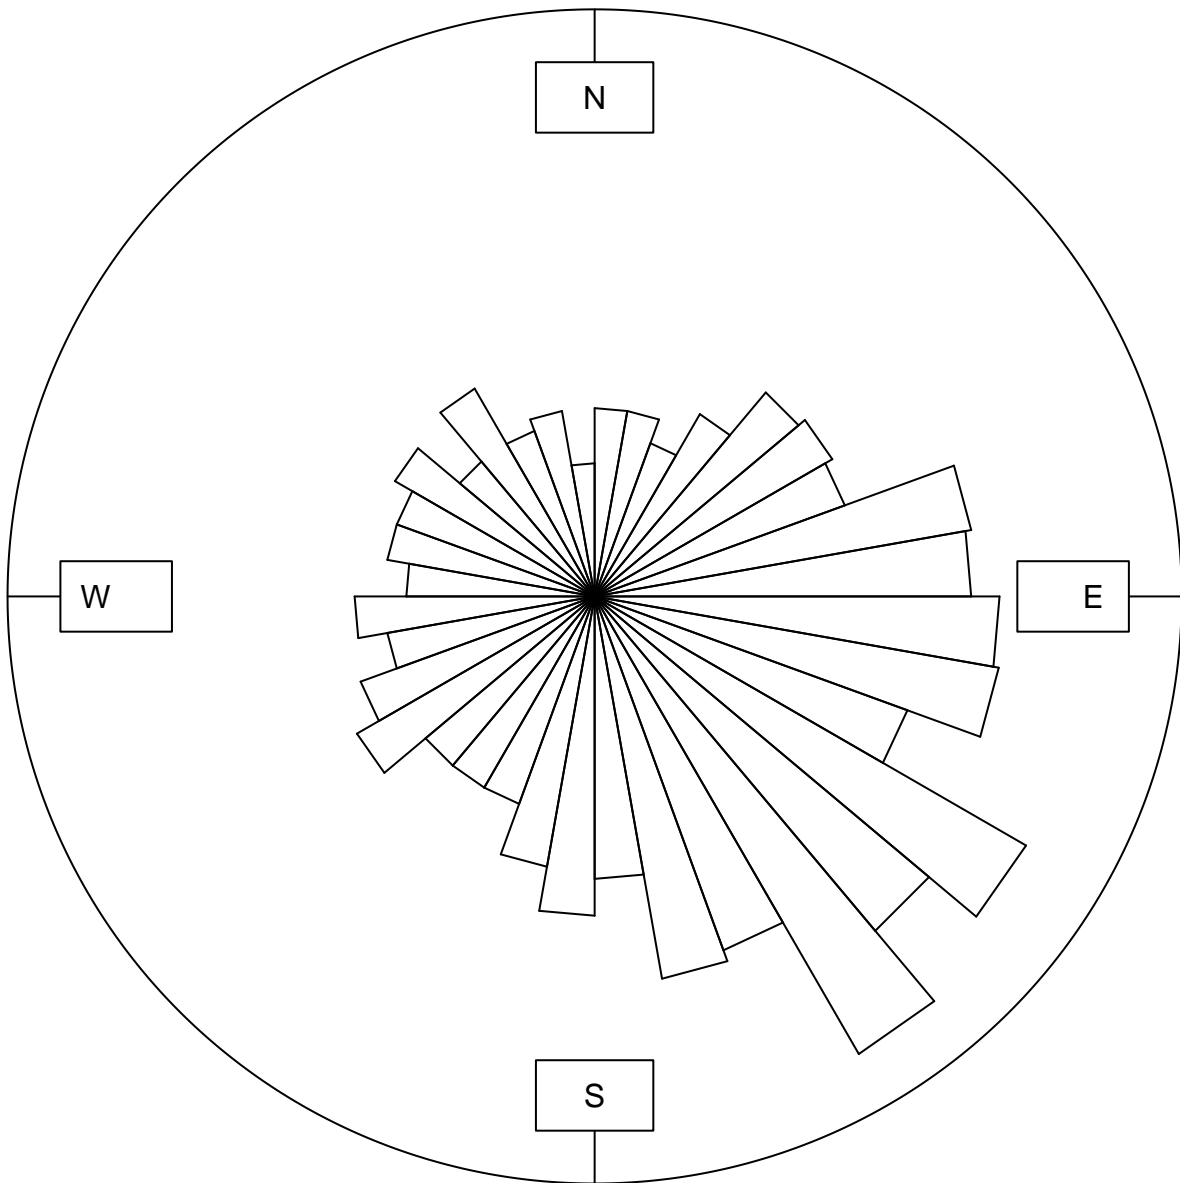

# bootstrap 738

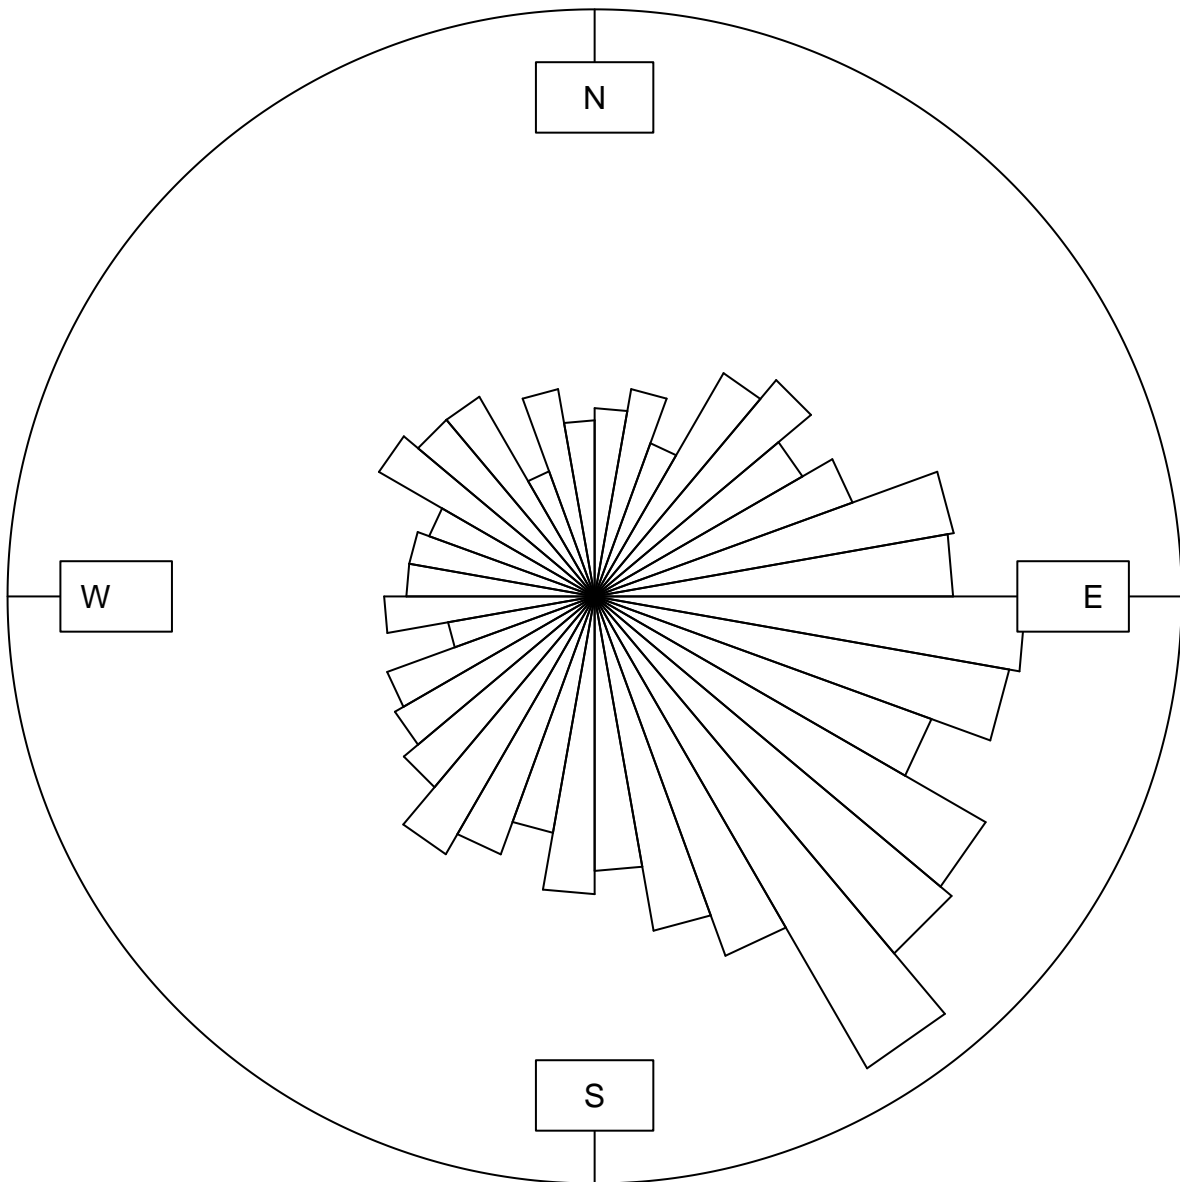

# bootstrap 739

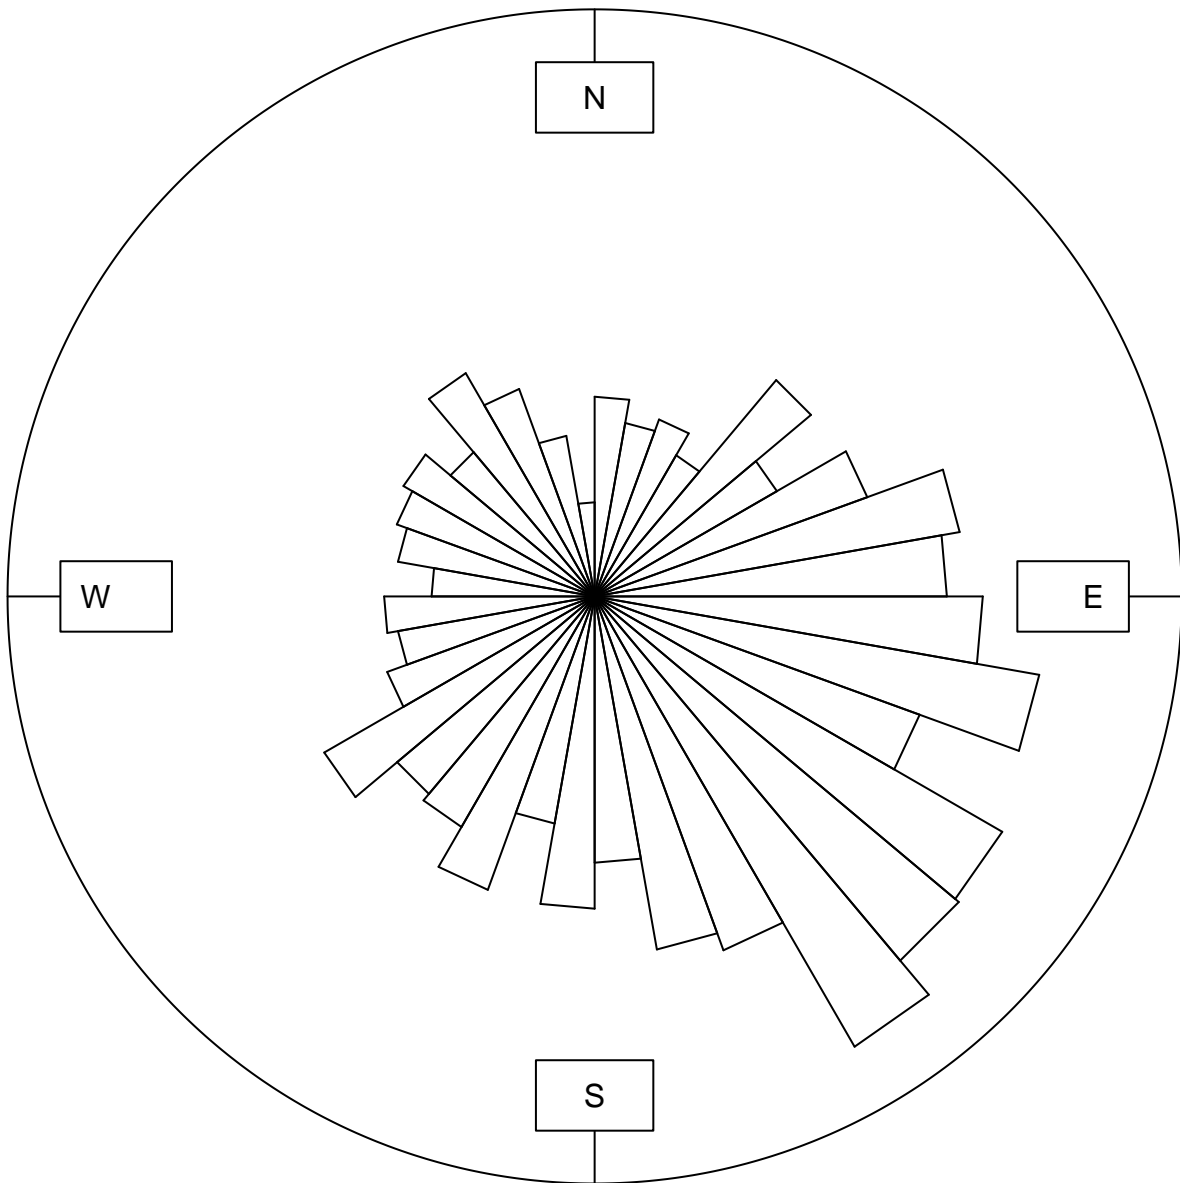

# bootstrap 740

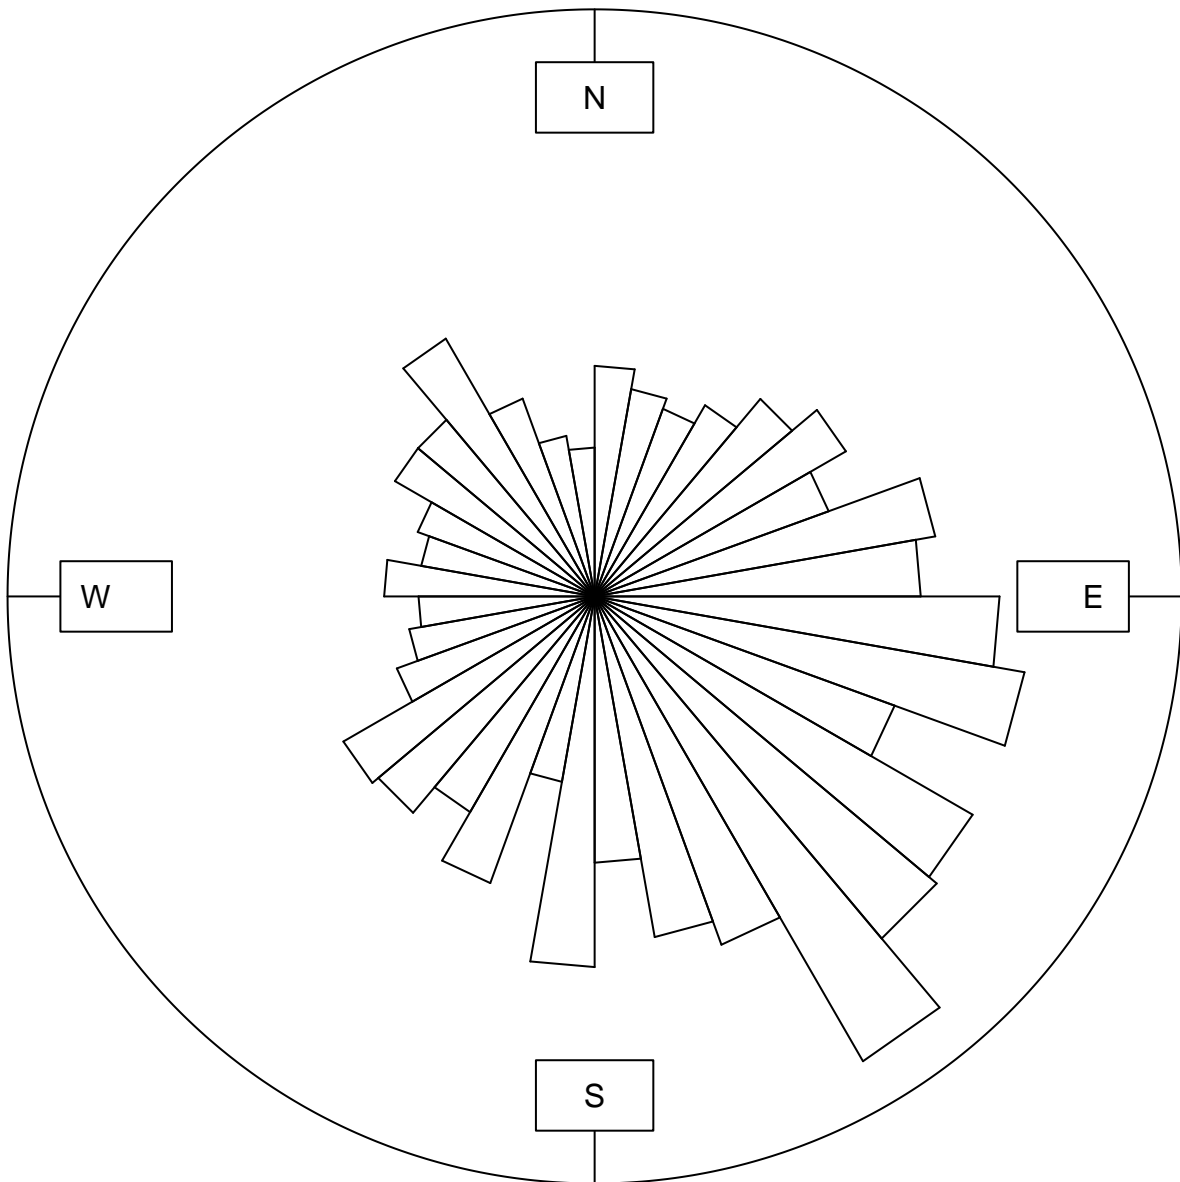

# bootstrap 741

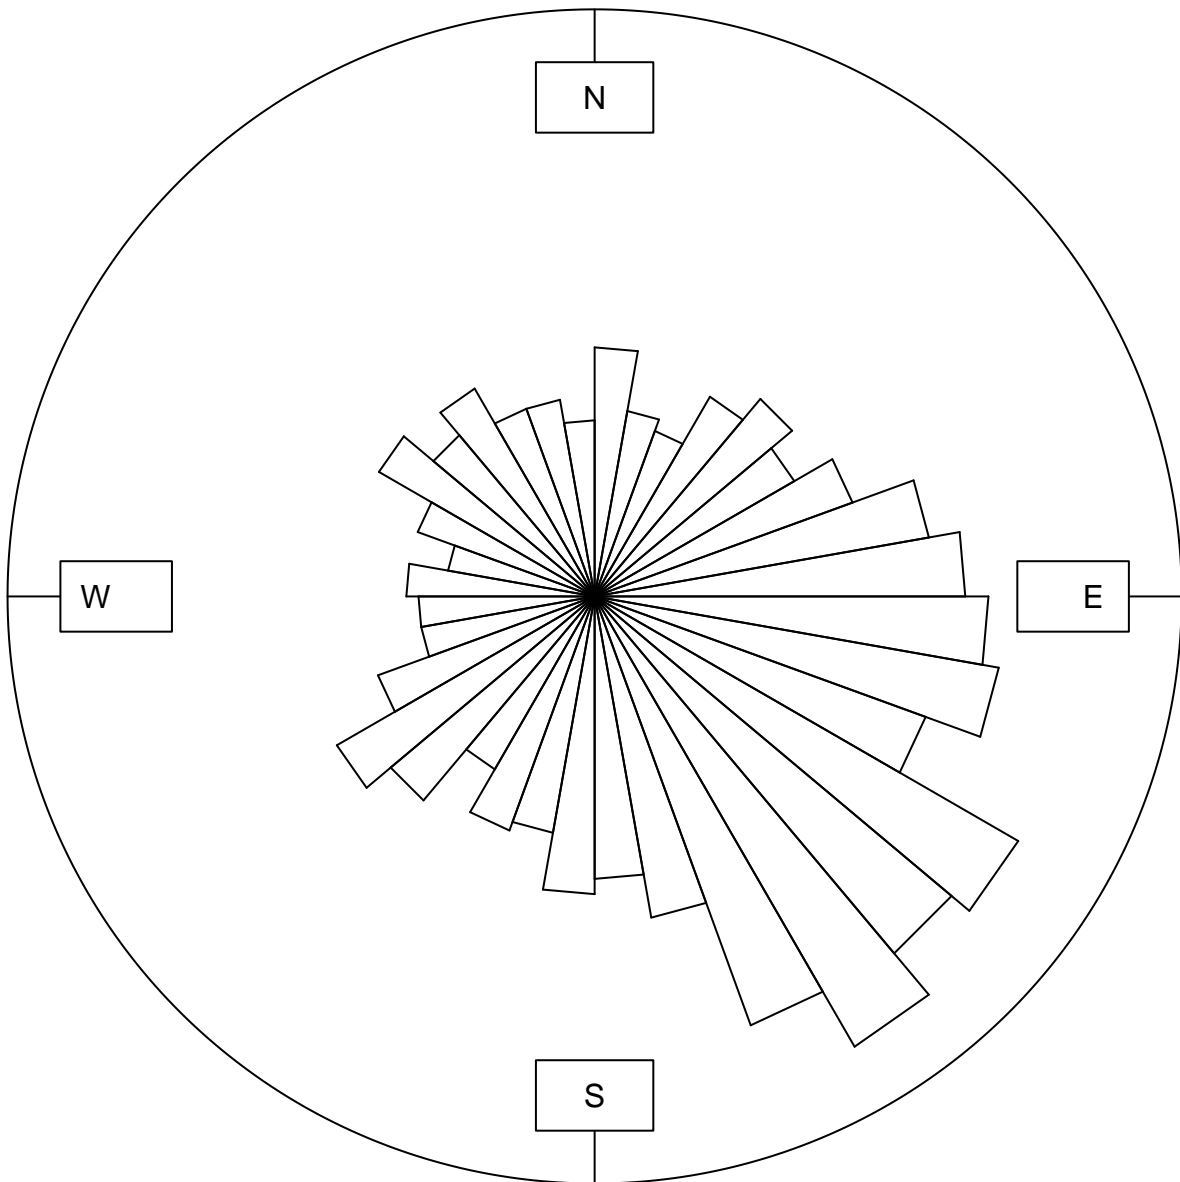

# bootstrap 742

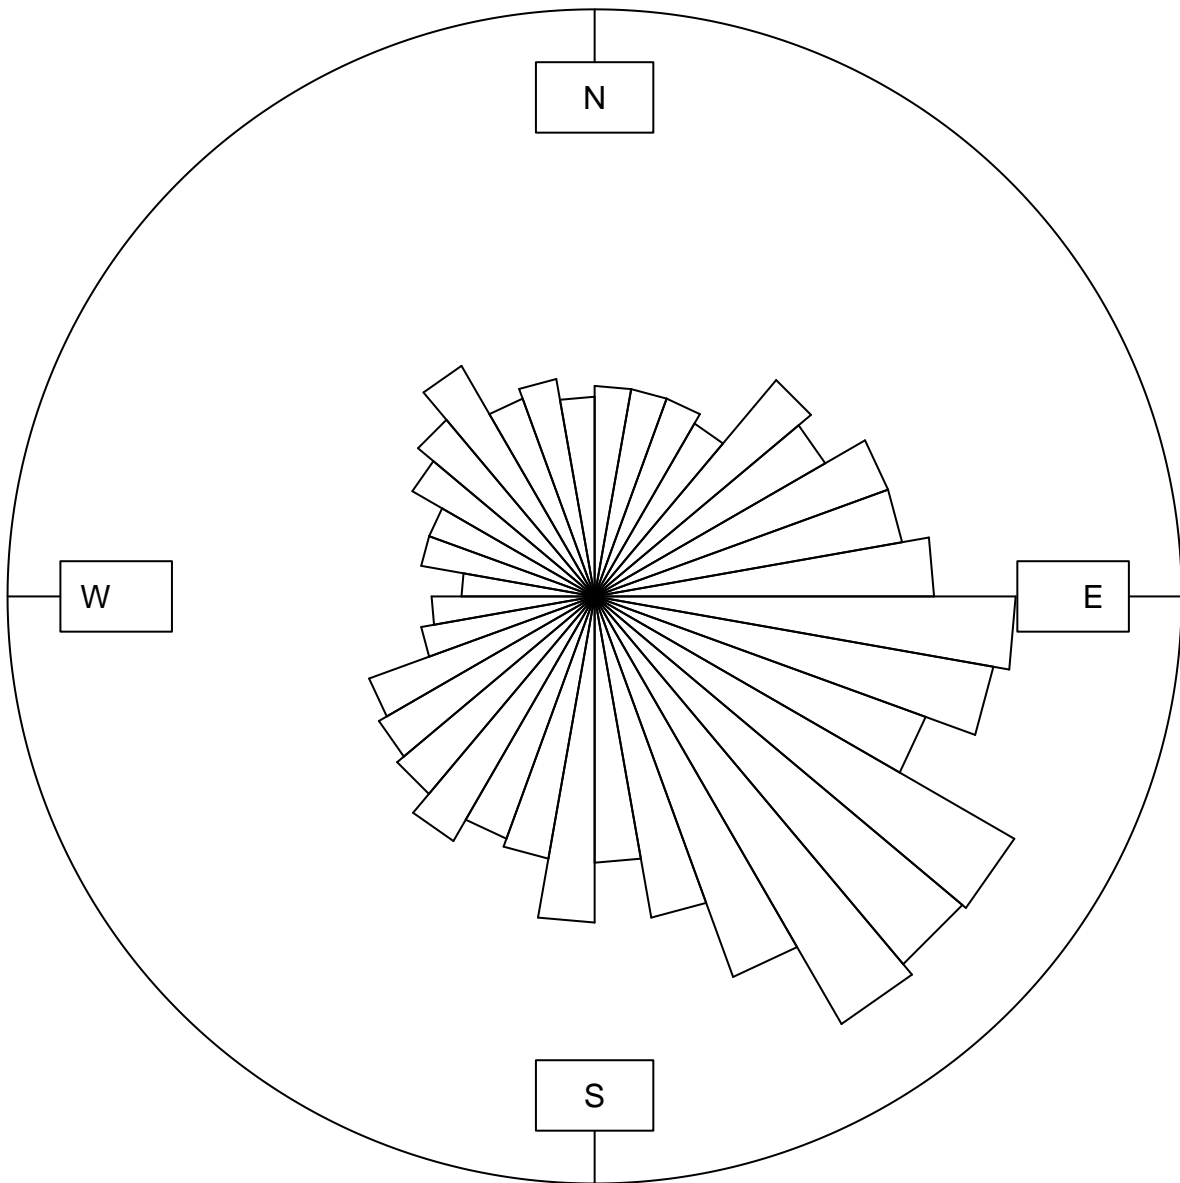

# bootstrap 743

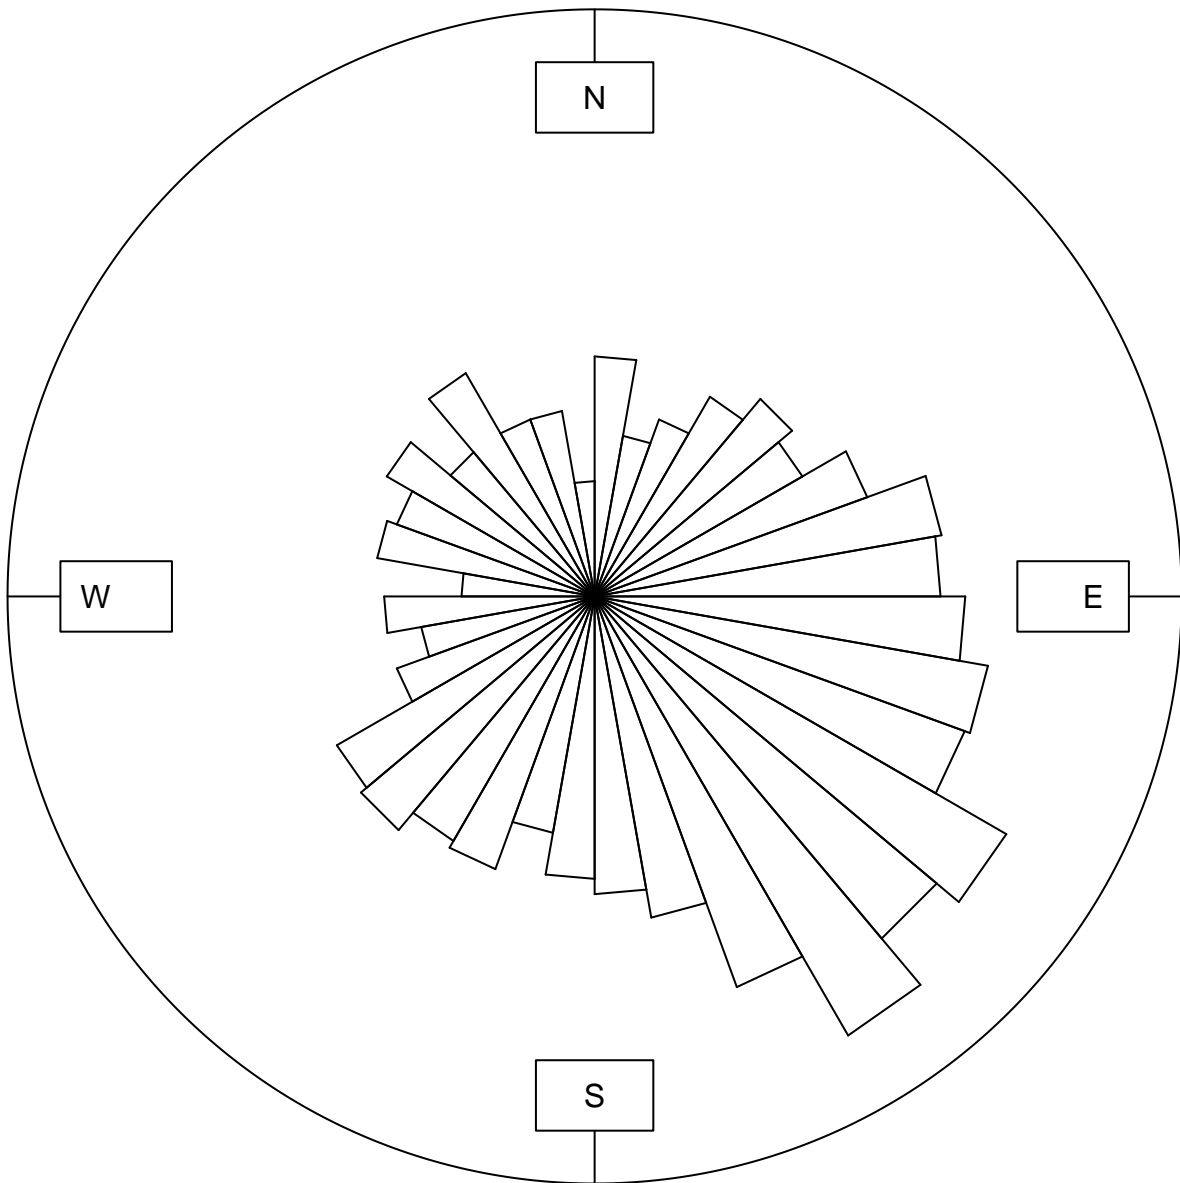

# bootstrap 744

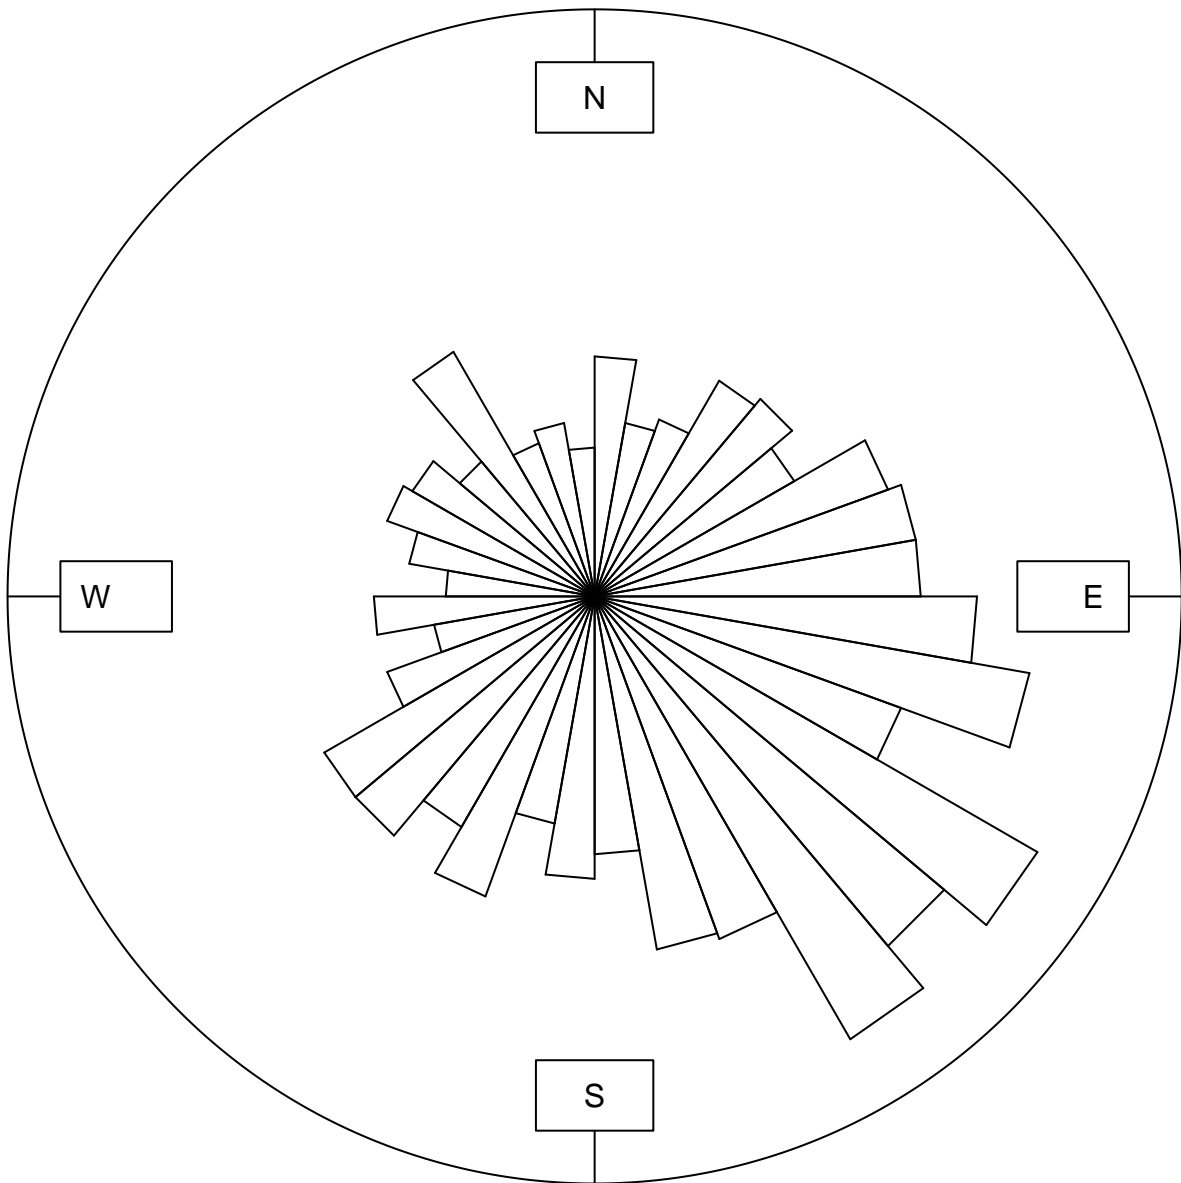



# bootstrap 745

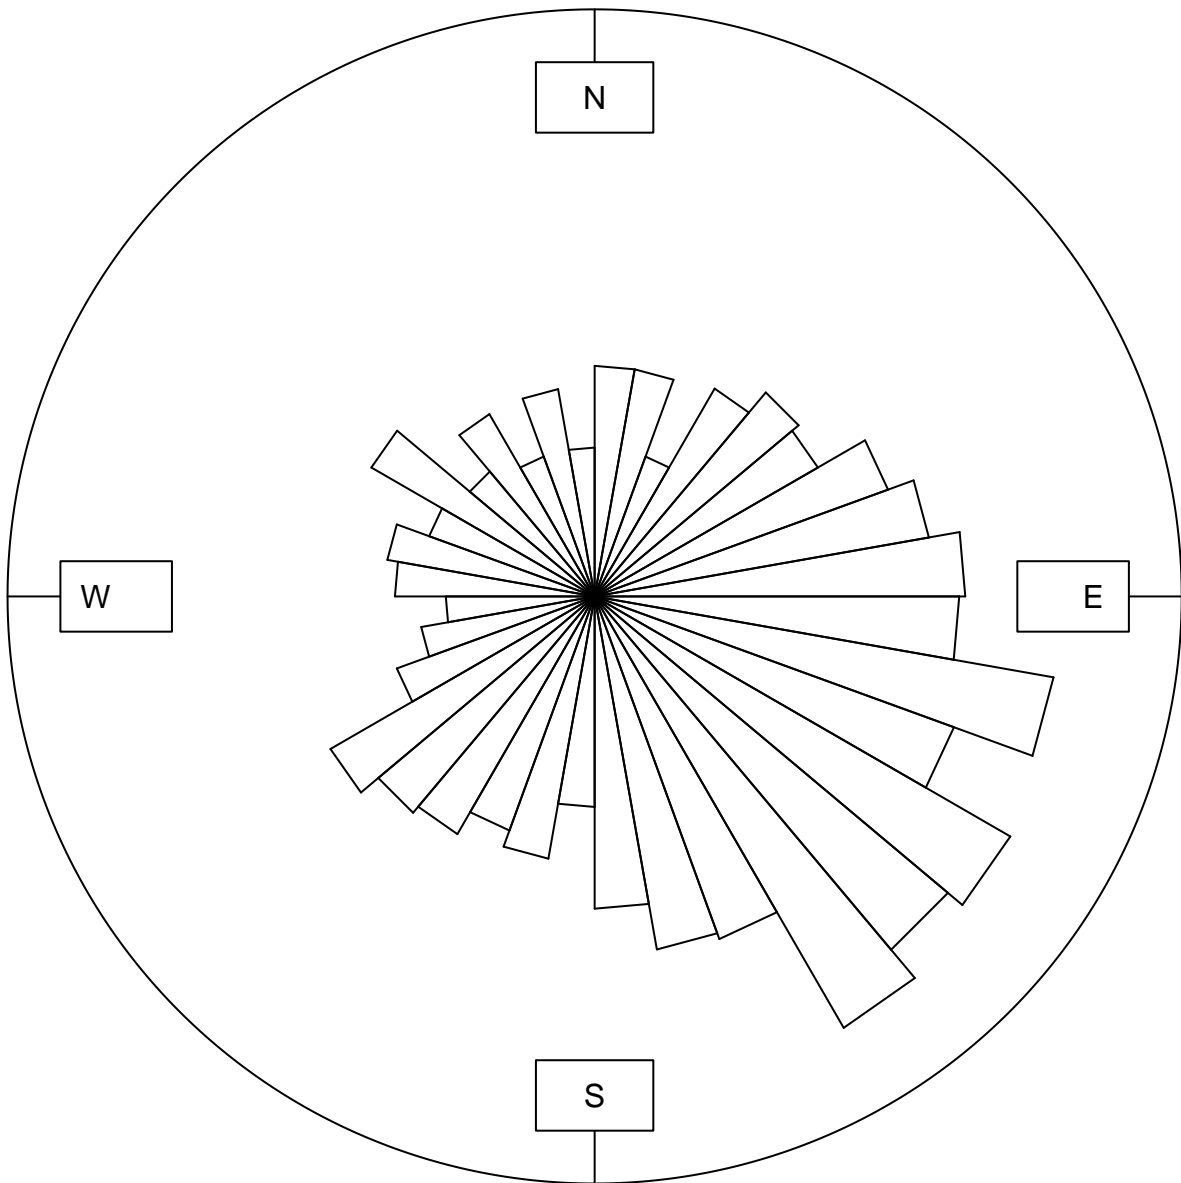

# bootstrap 746

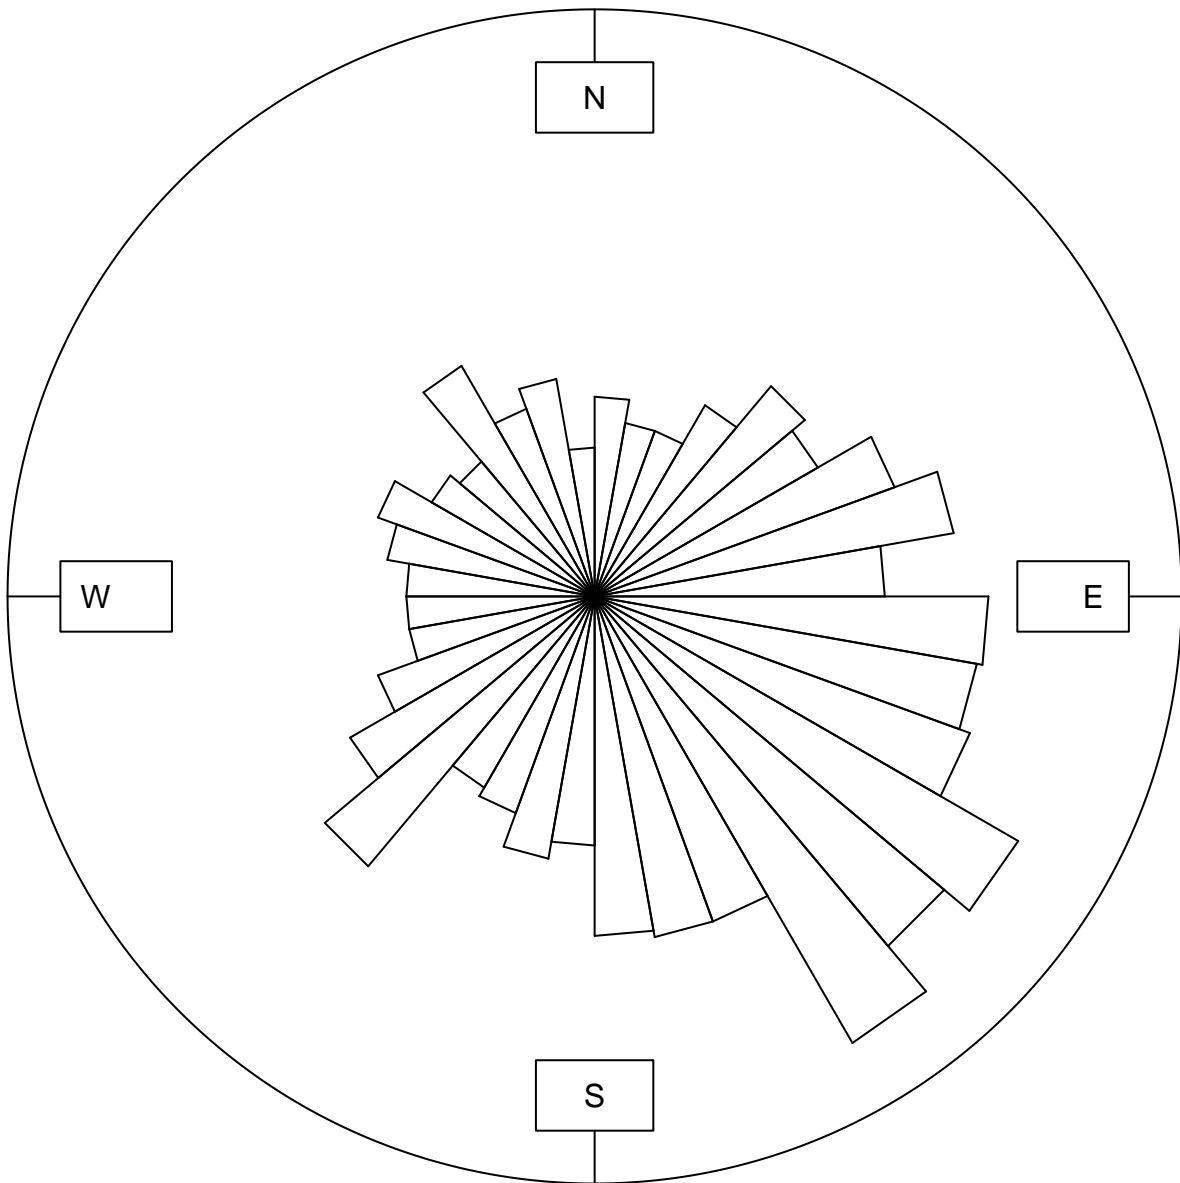

# bootstrap 747

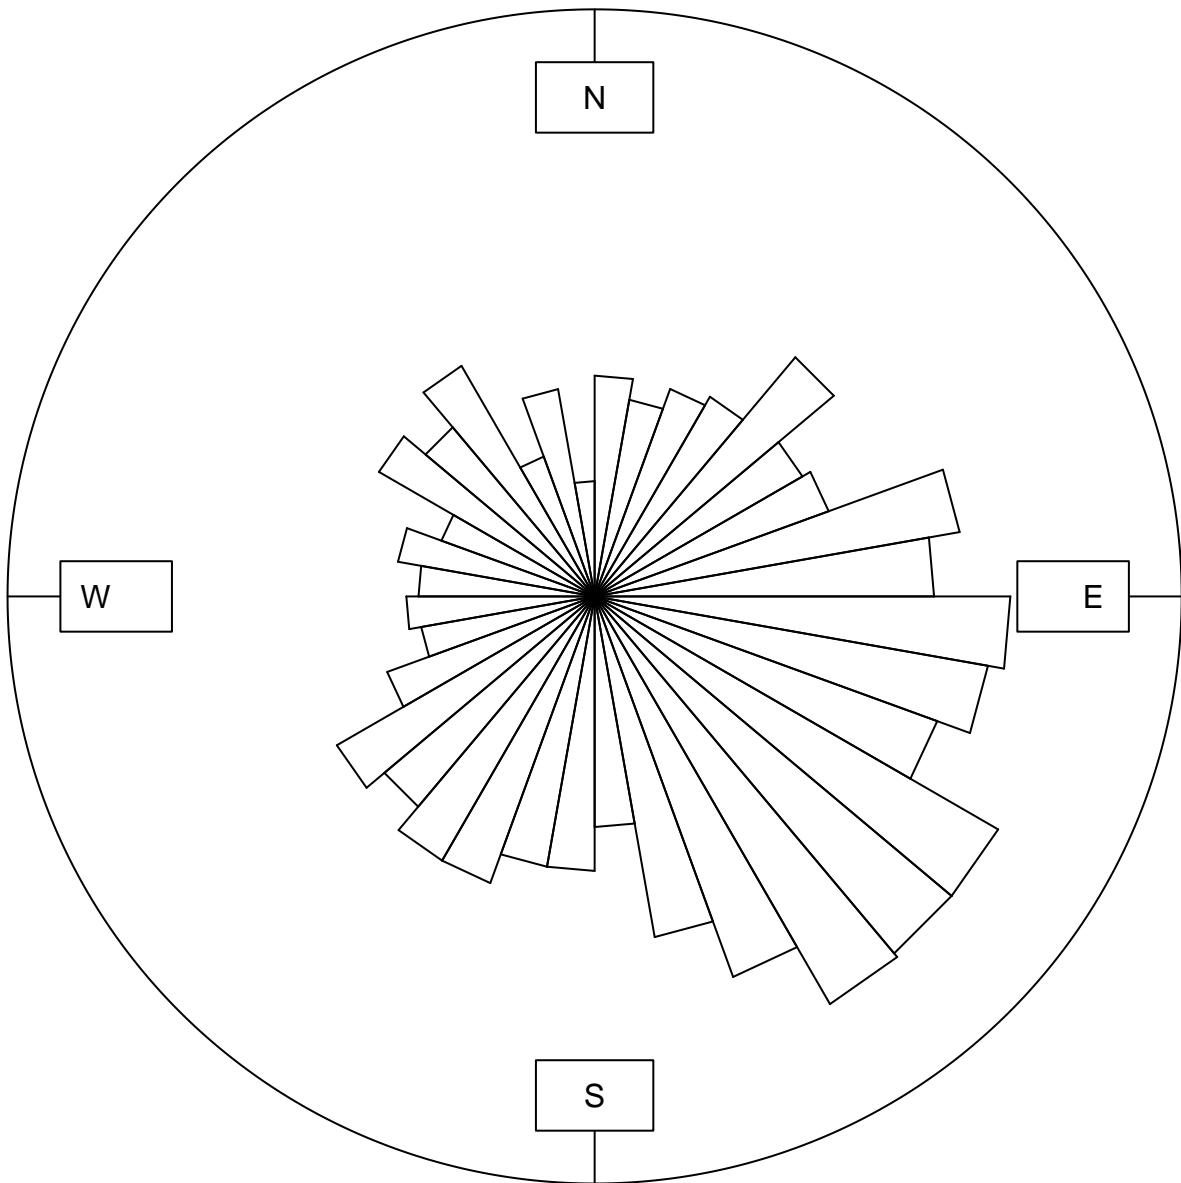

# bootstrap 748

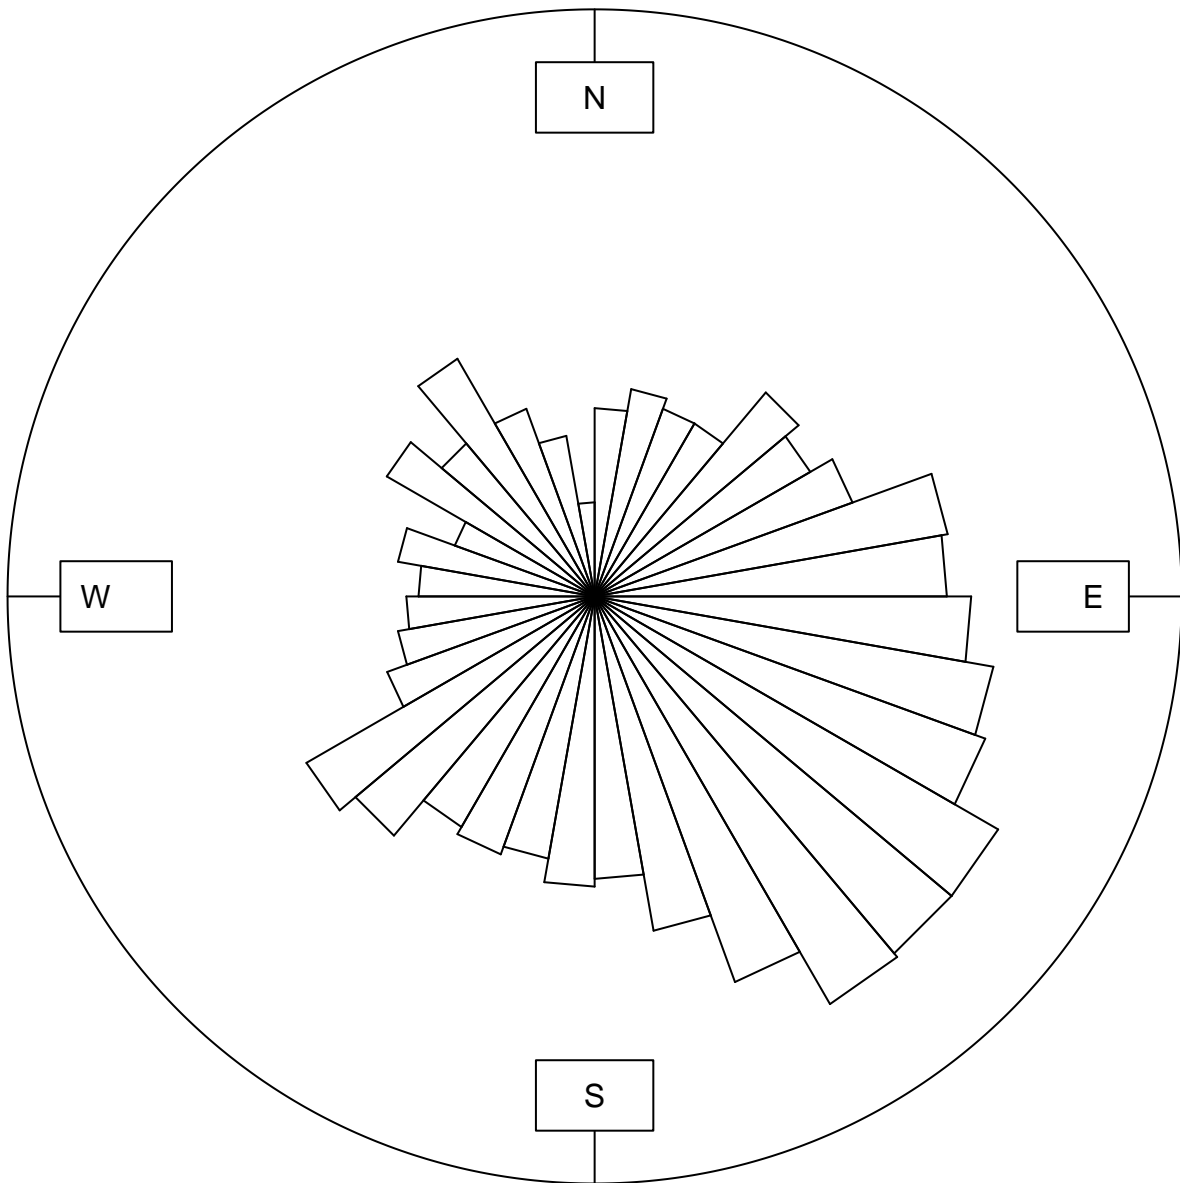

# bootstrap 749

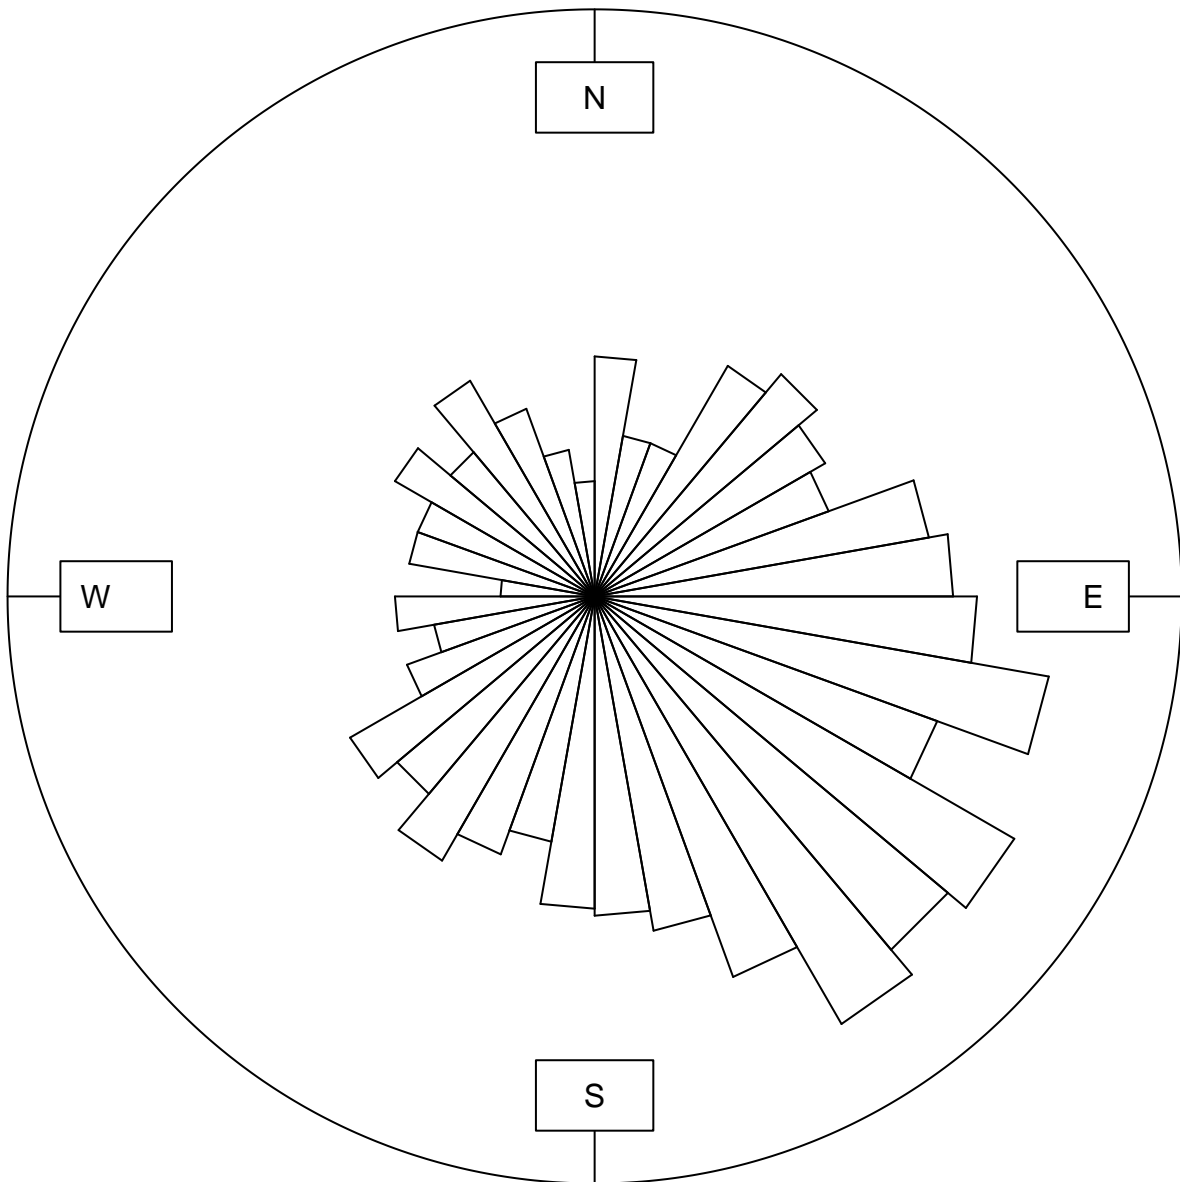

# bootstrap 750

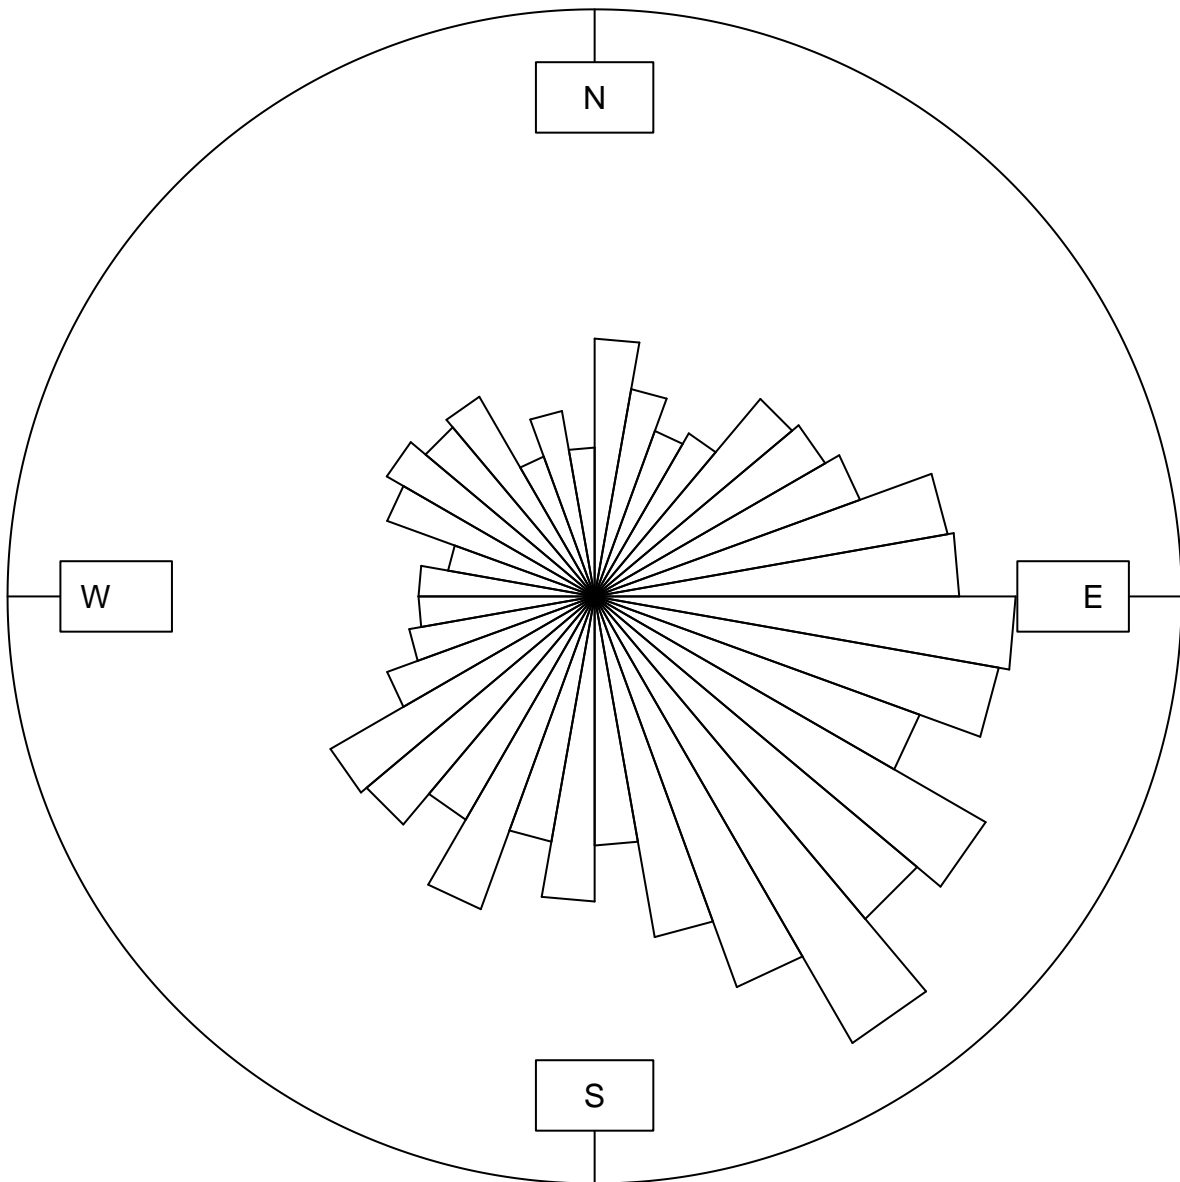

# bootstrap 751

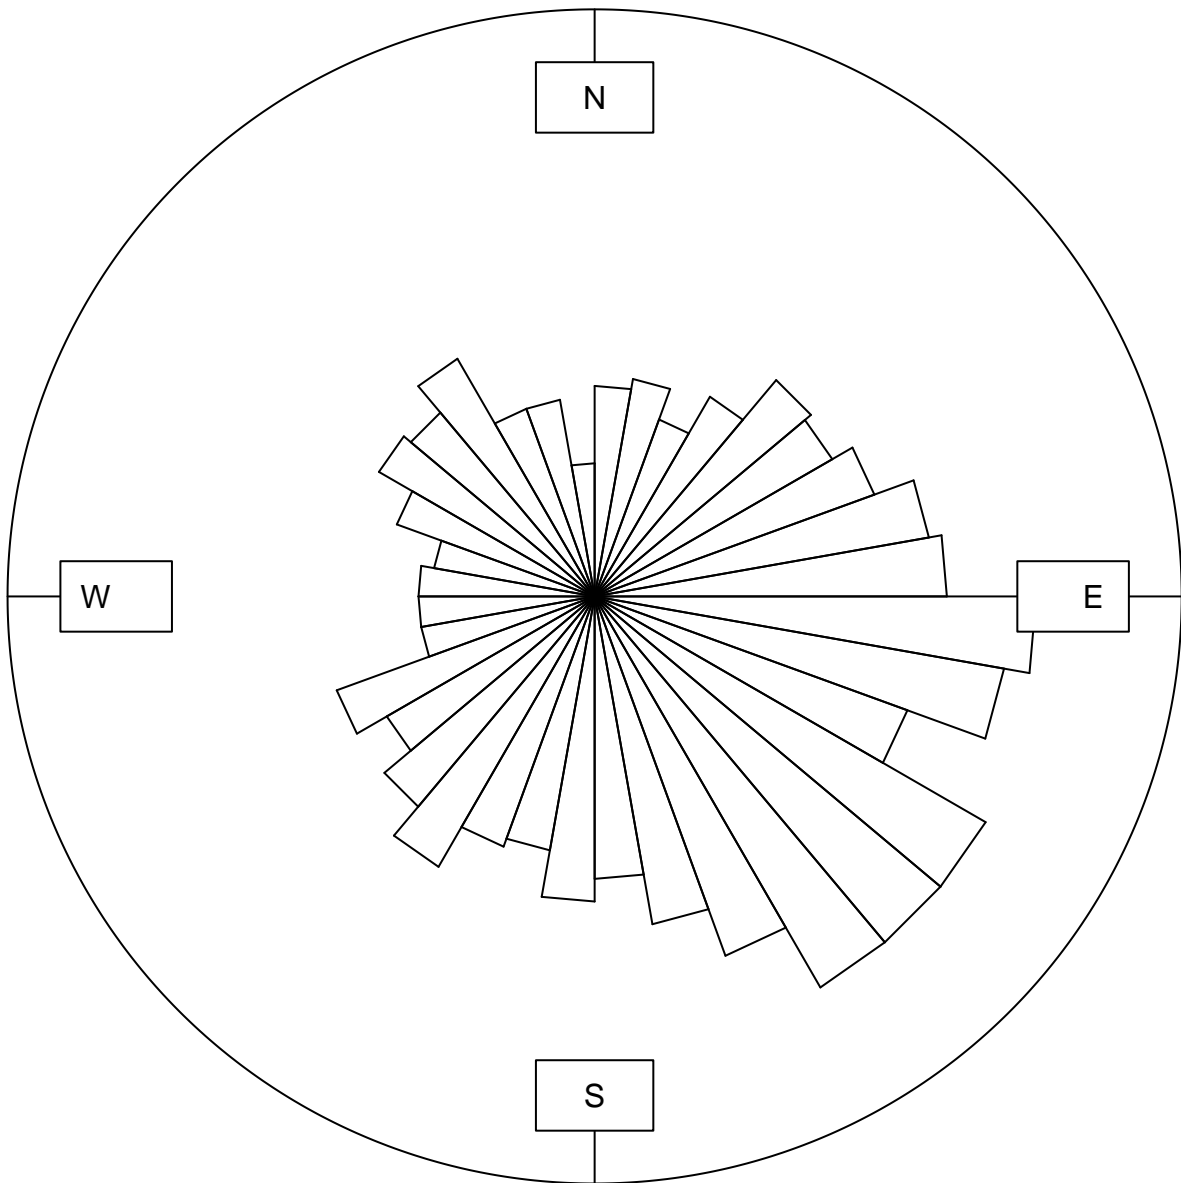

# bootstrap 752

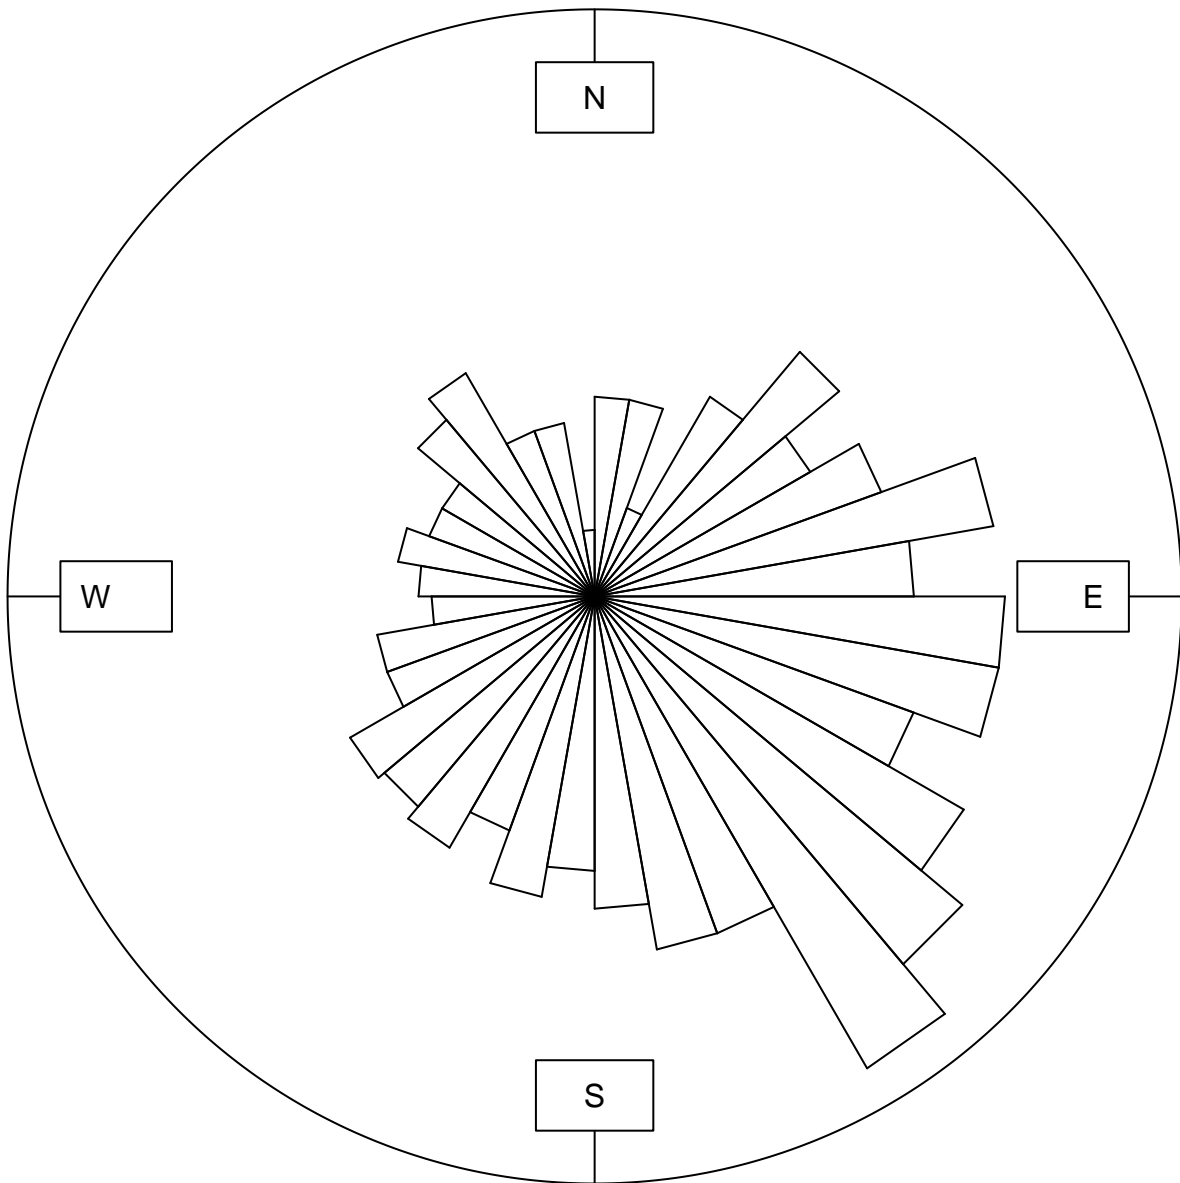



# bootstrap 753

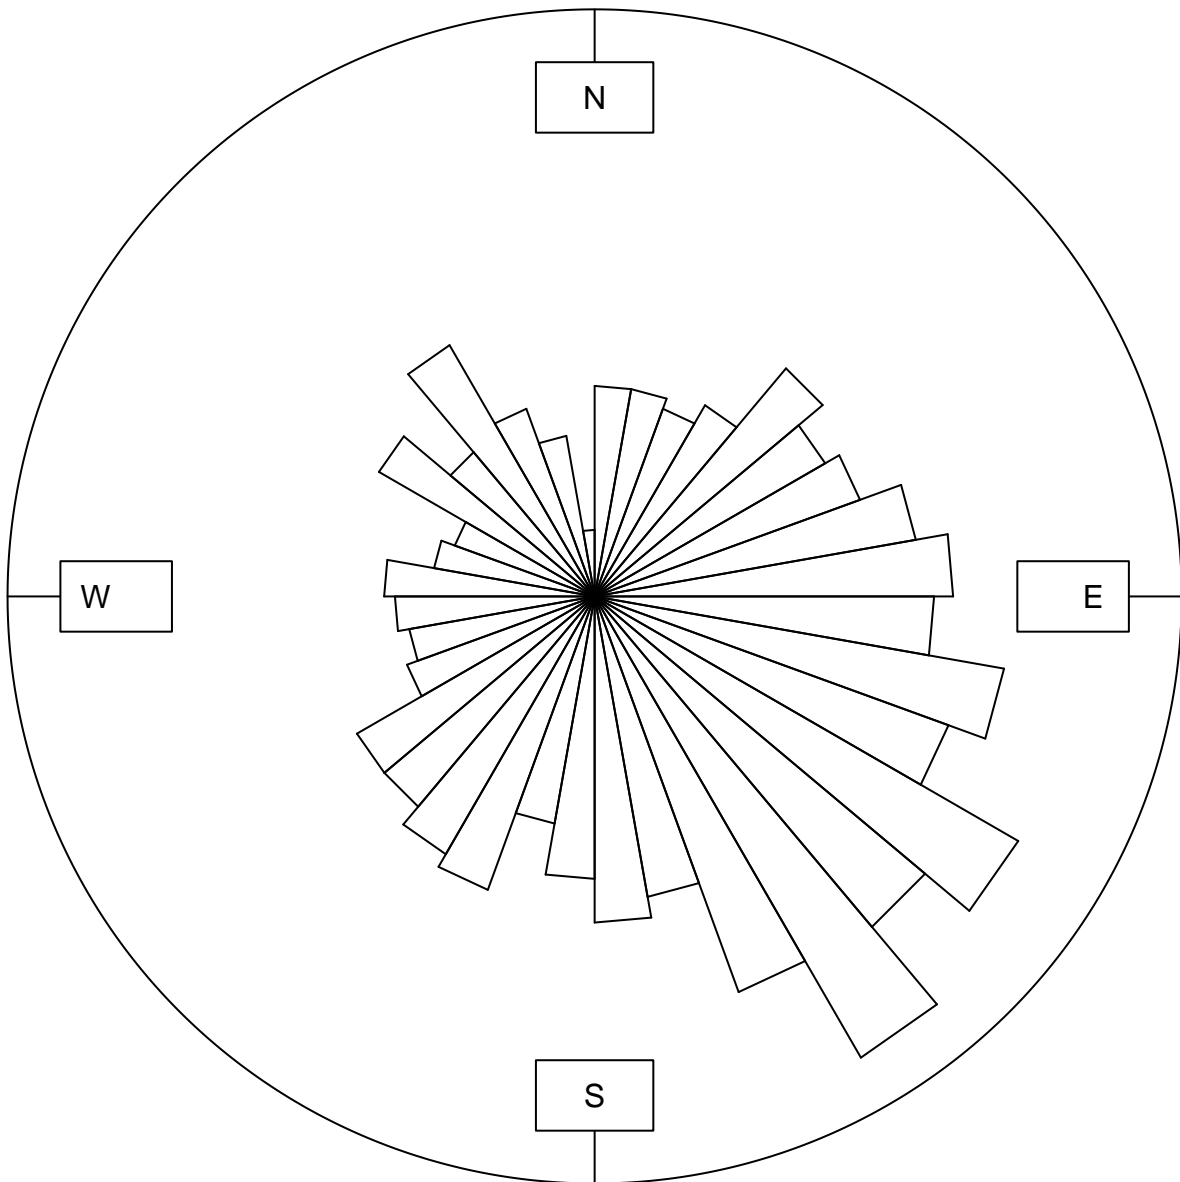

# bootstrap 754

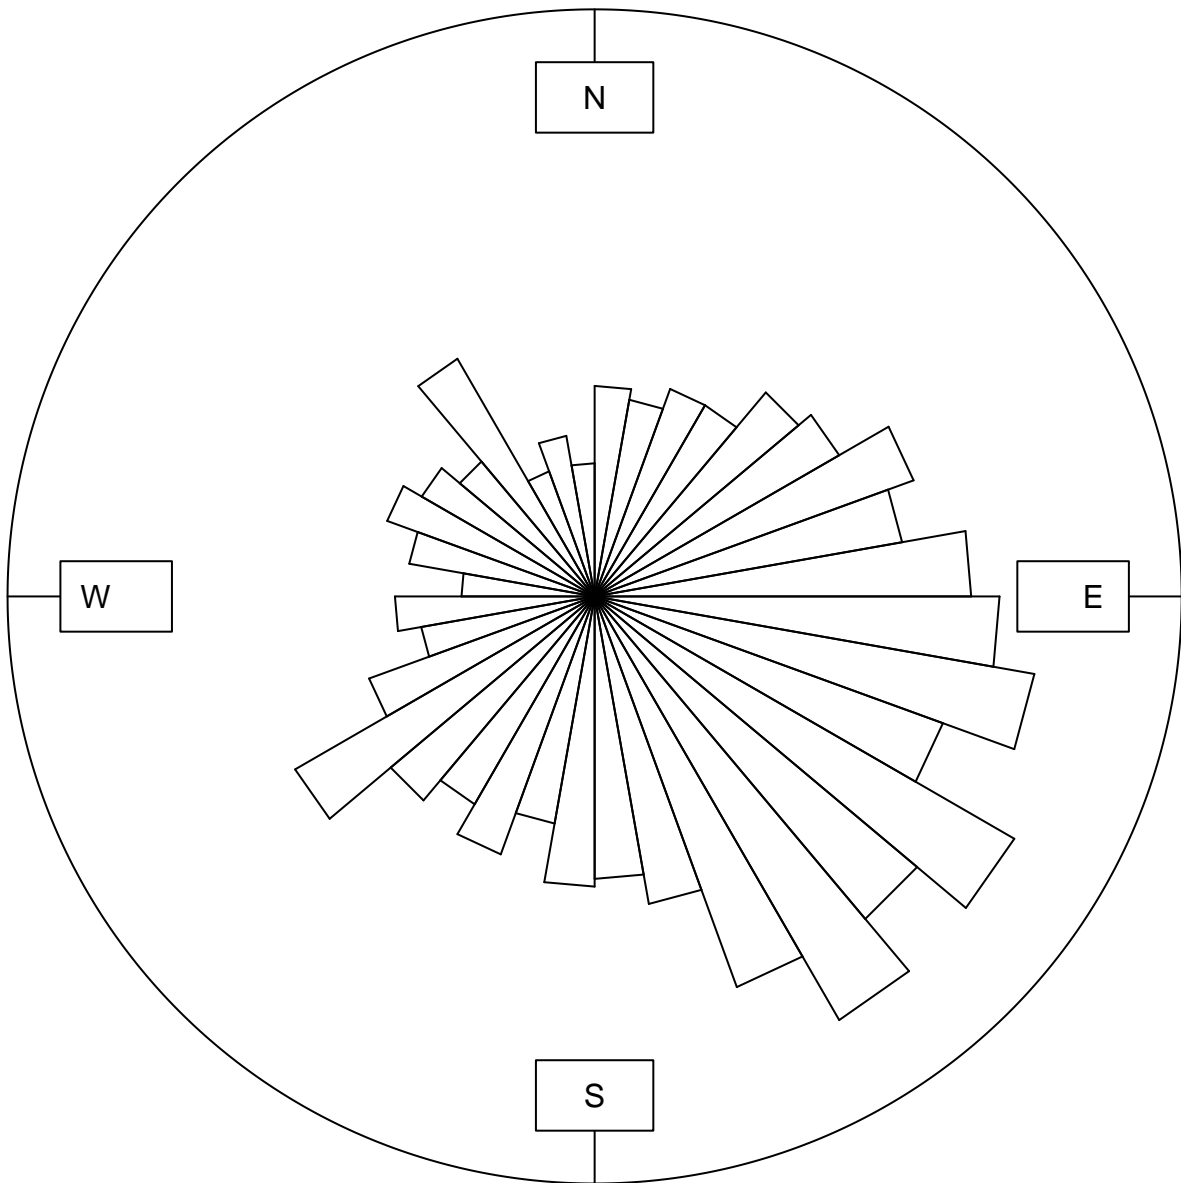

# bootstrap 755

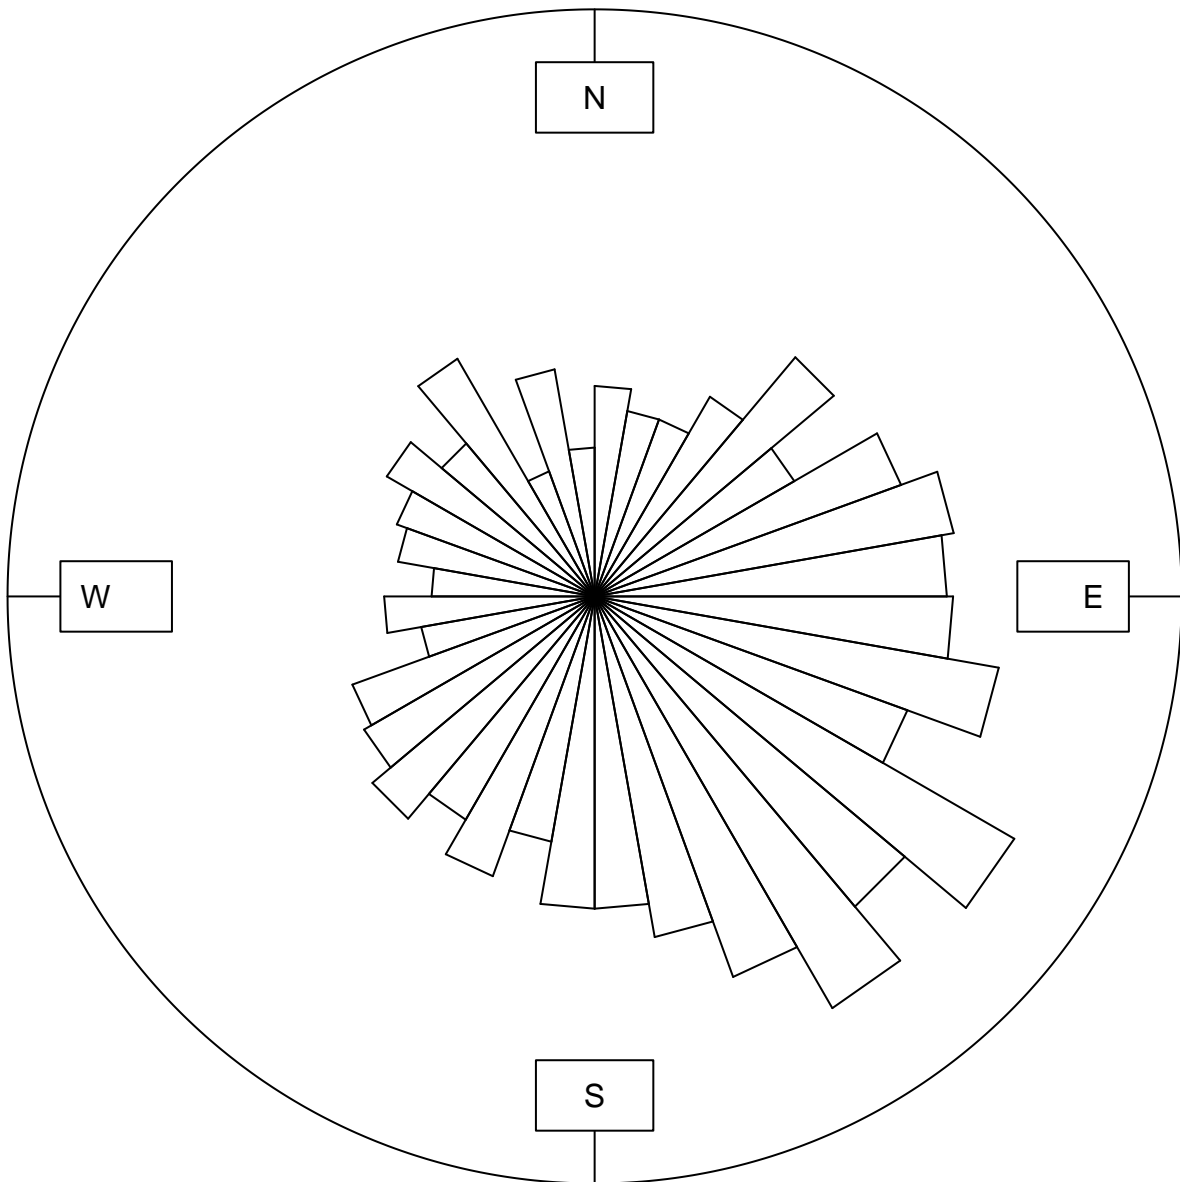

# bootstrap 756

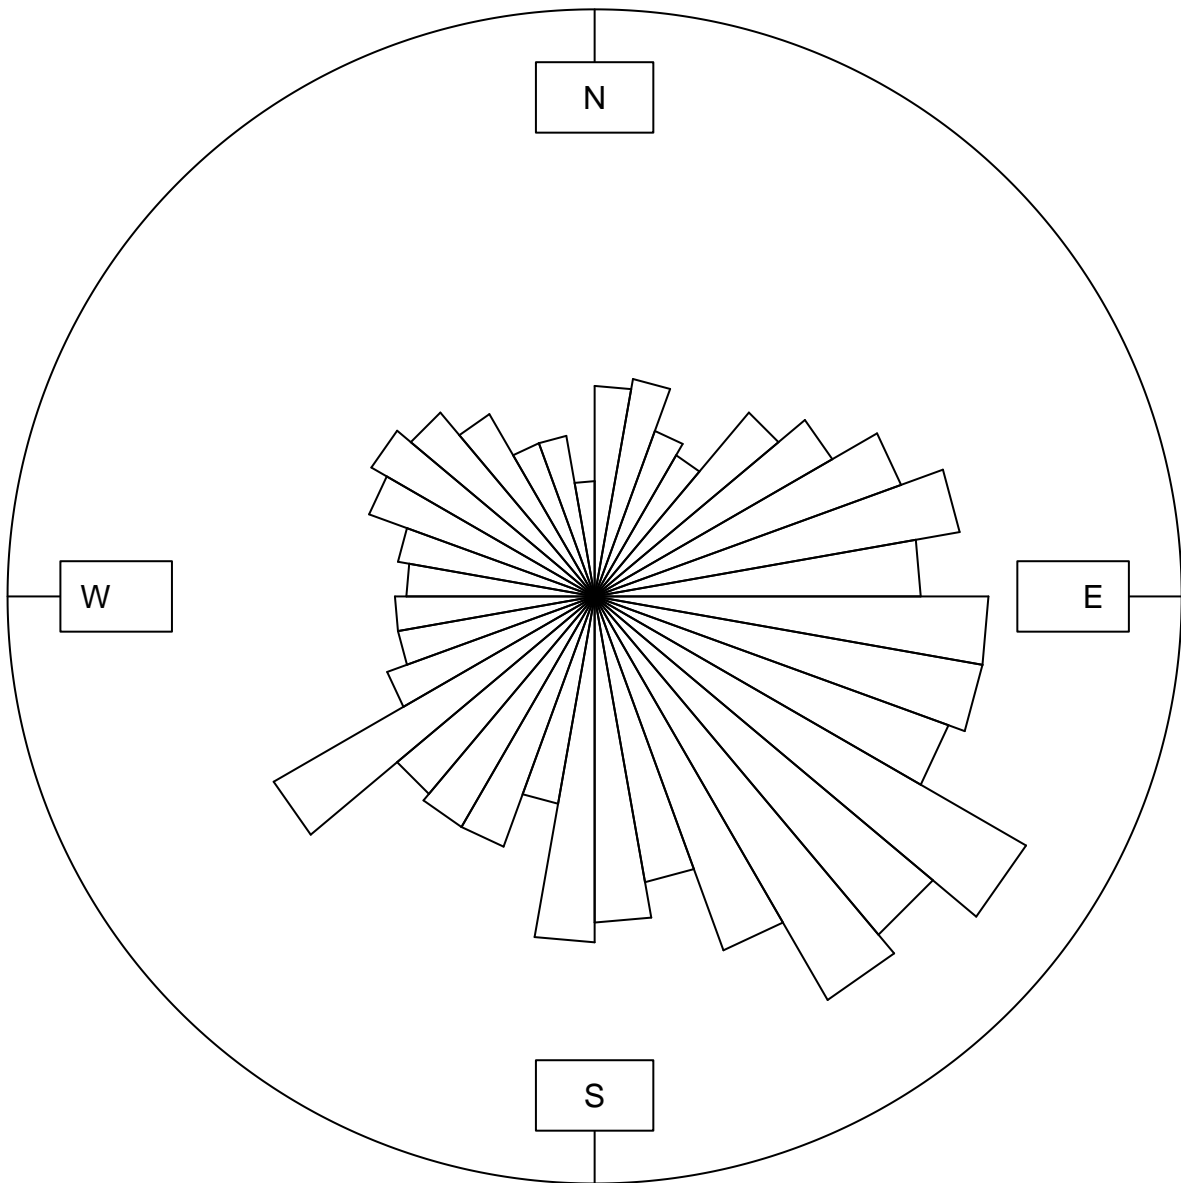

# bootstrap 757

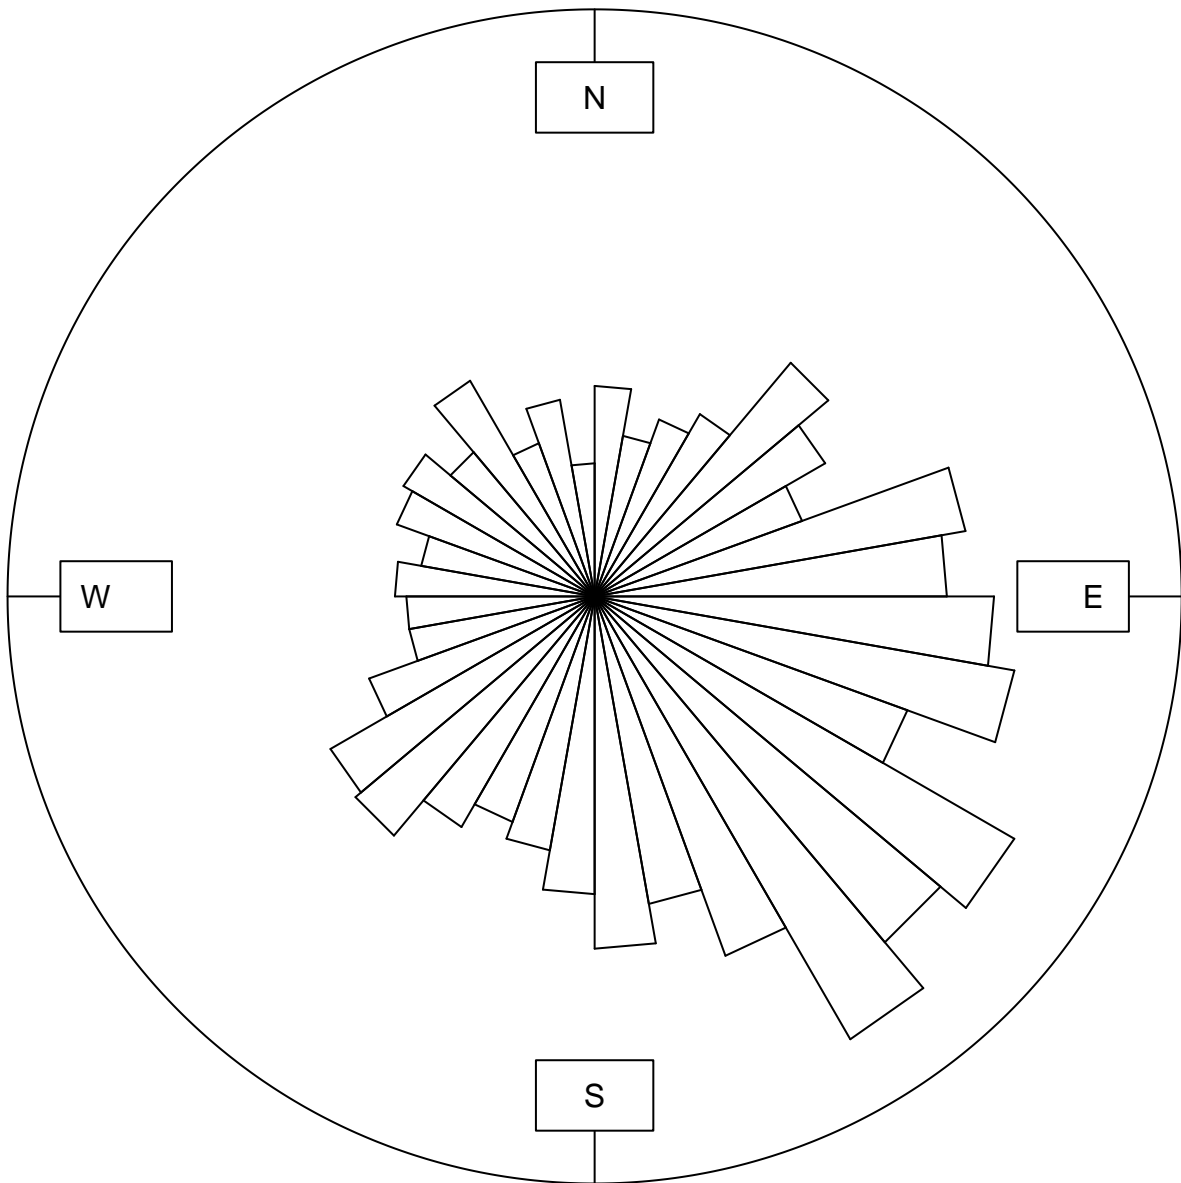

# bootstrap 758

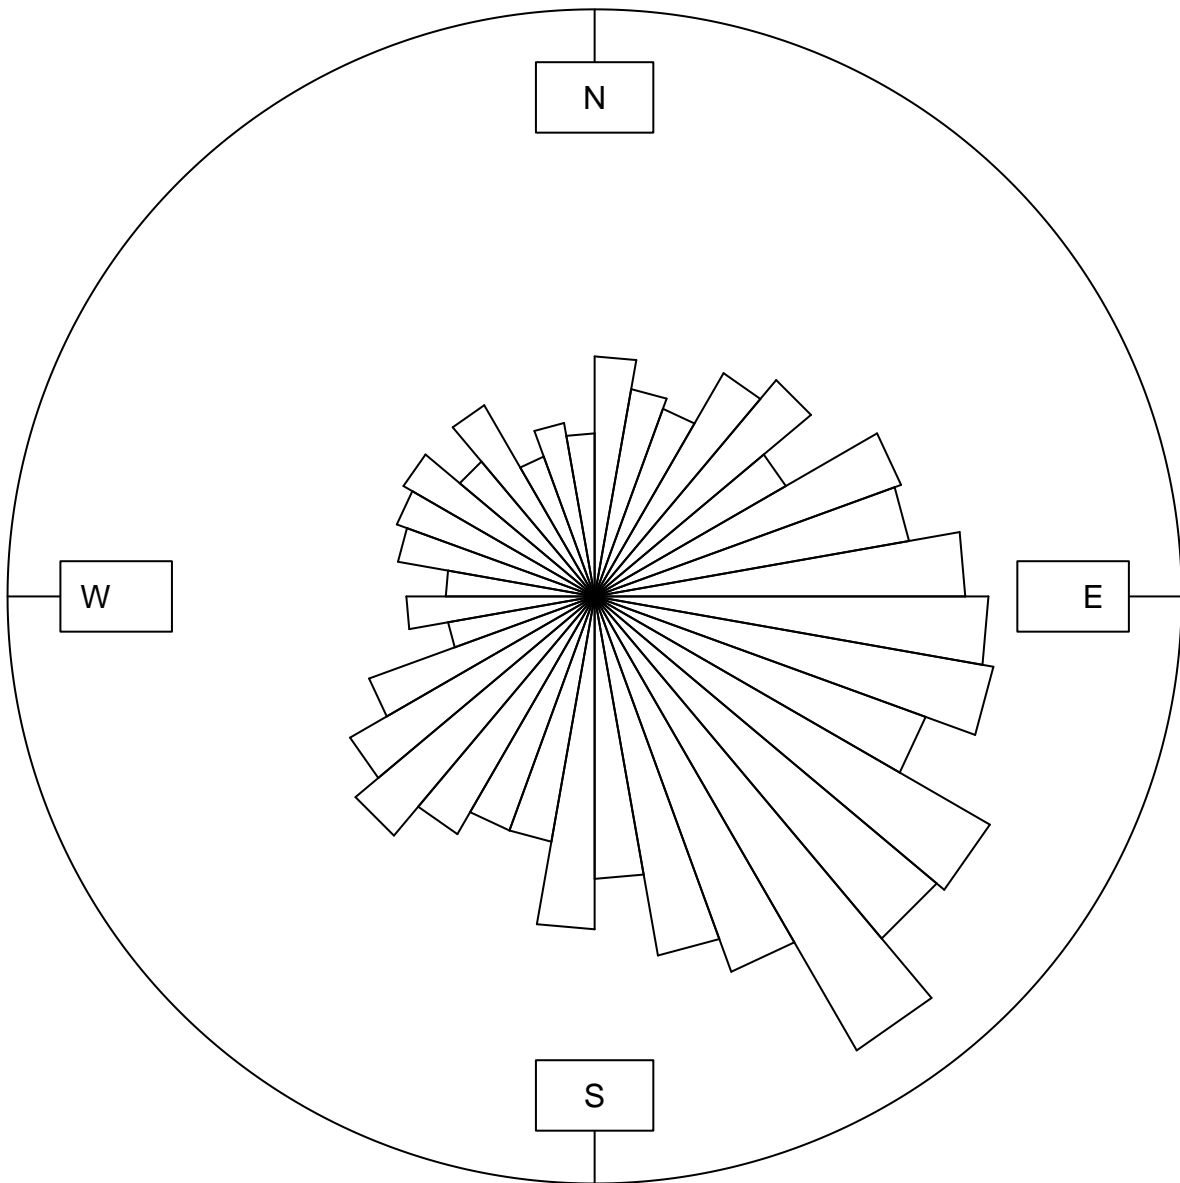

# bootstrap 759

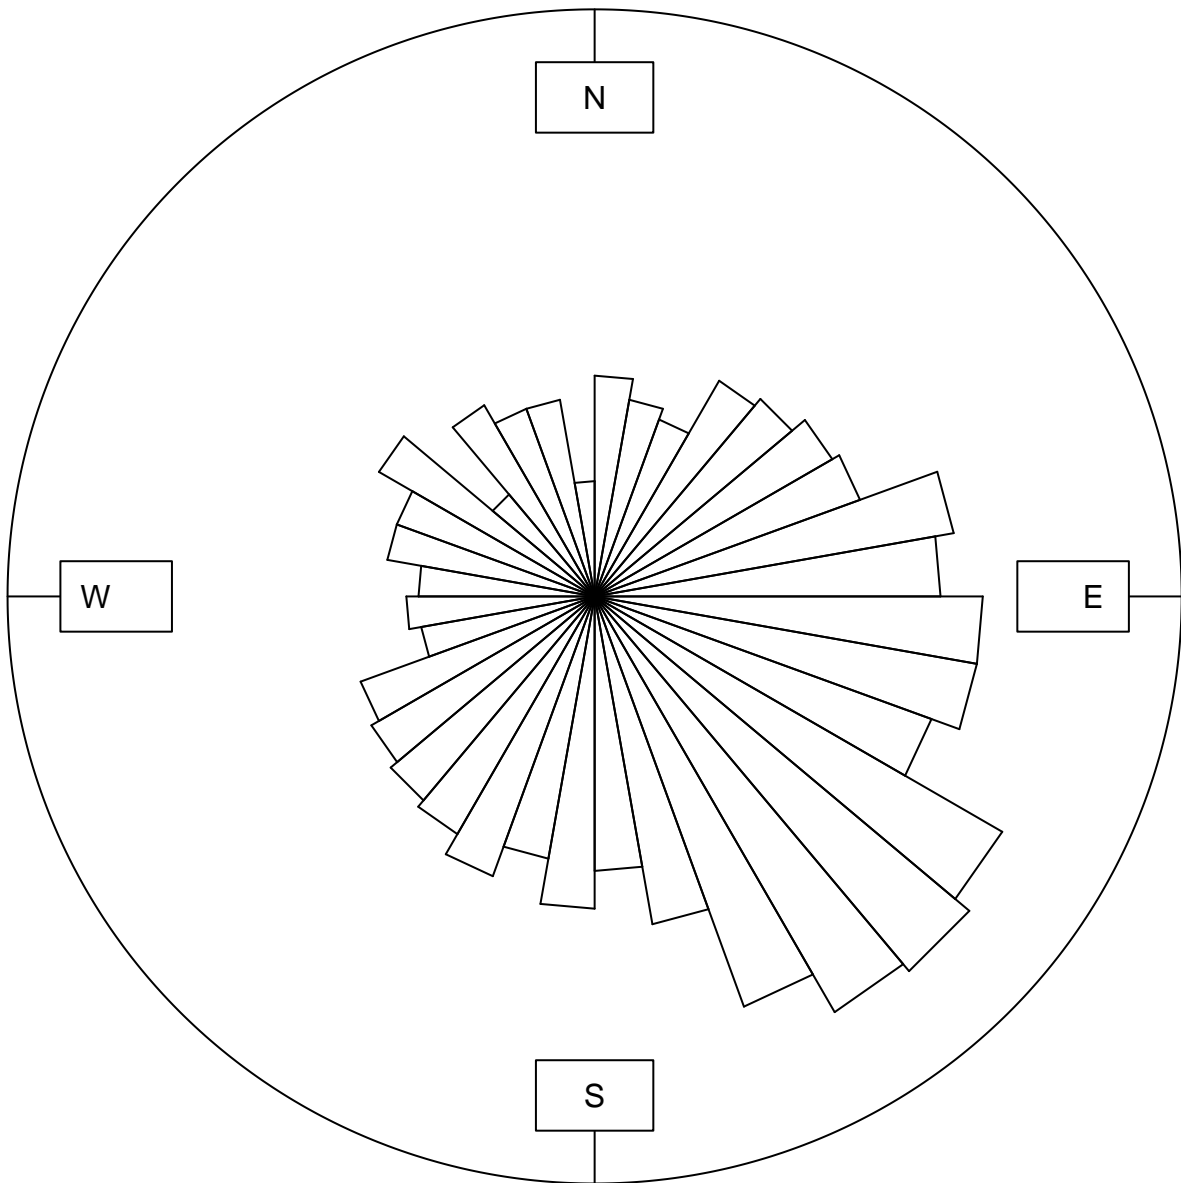

# bootstrap 760

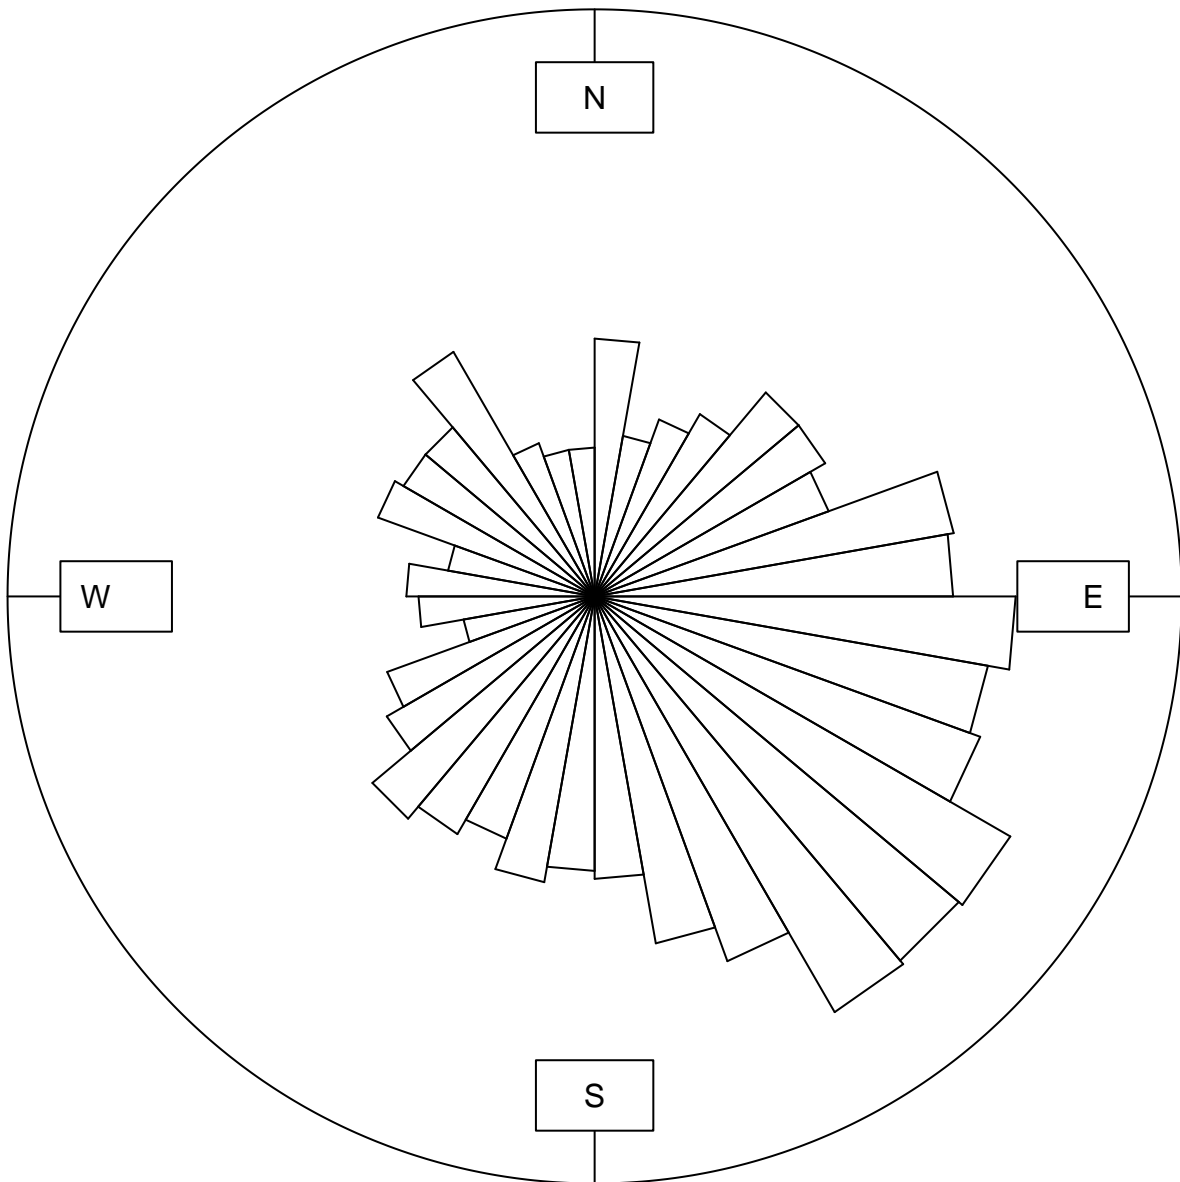



# bootstrap 761

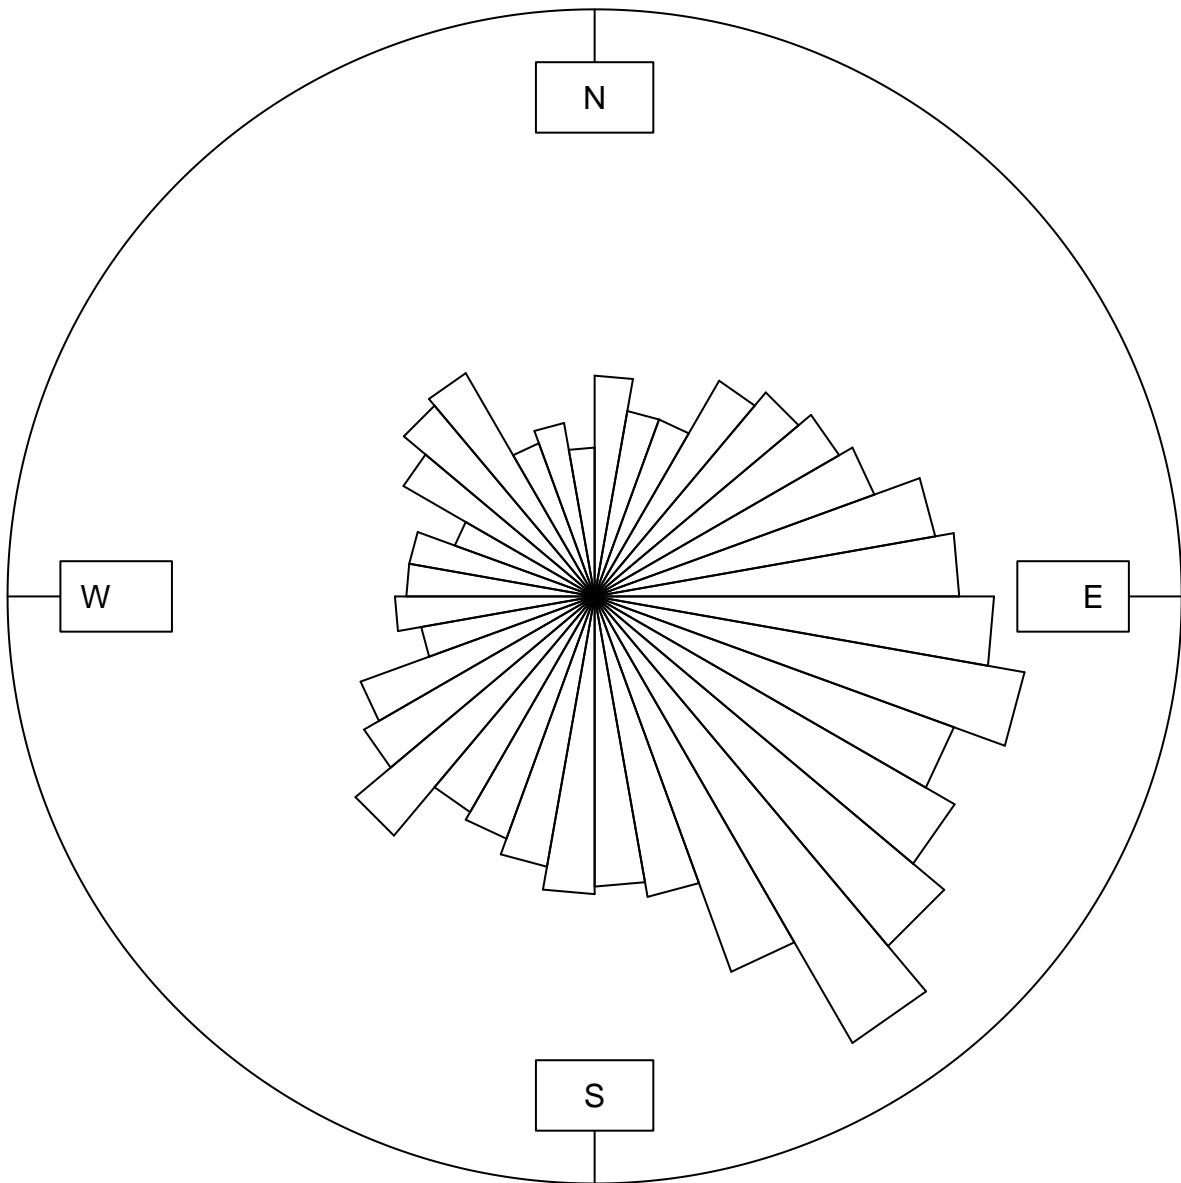

# bootstrap 762

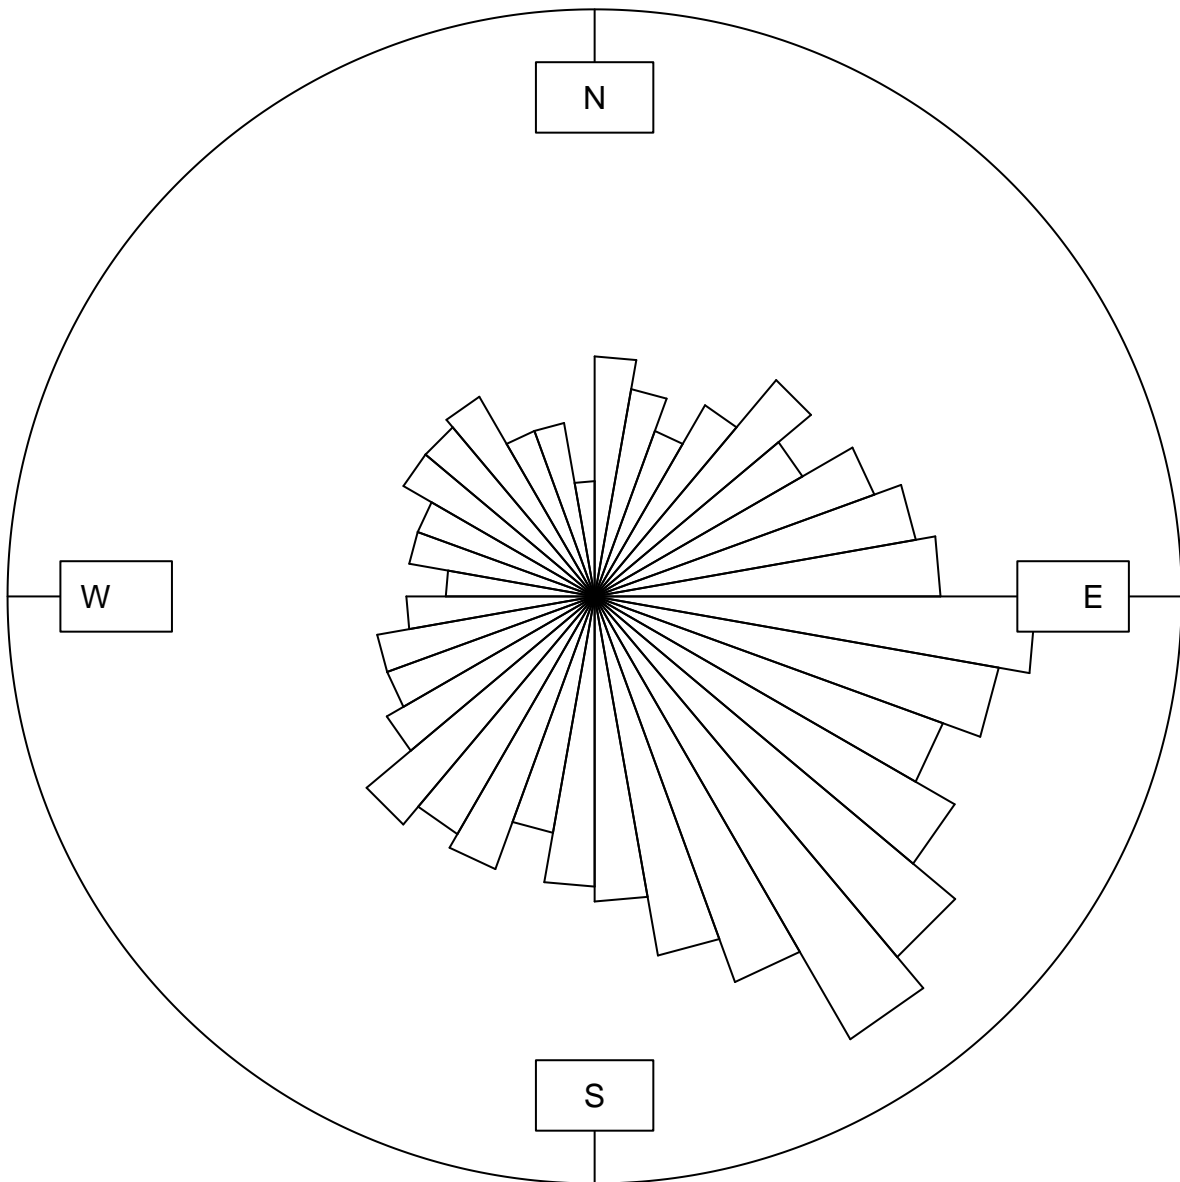

# bootstrap 763

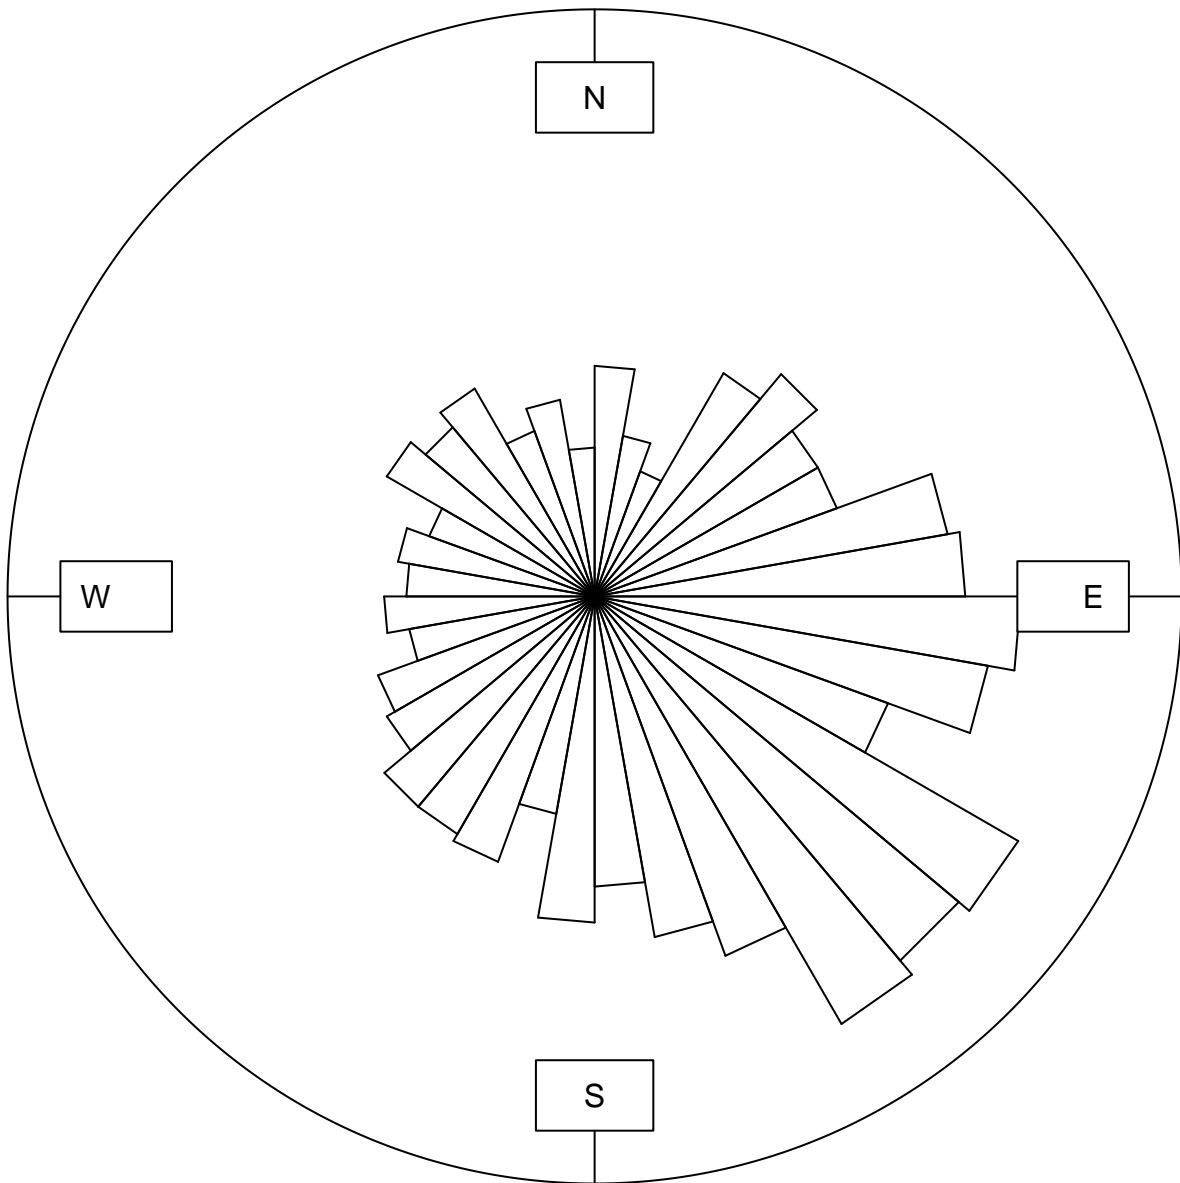

# bootstrap 764

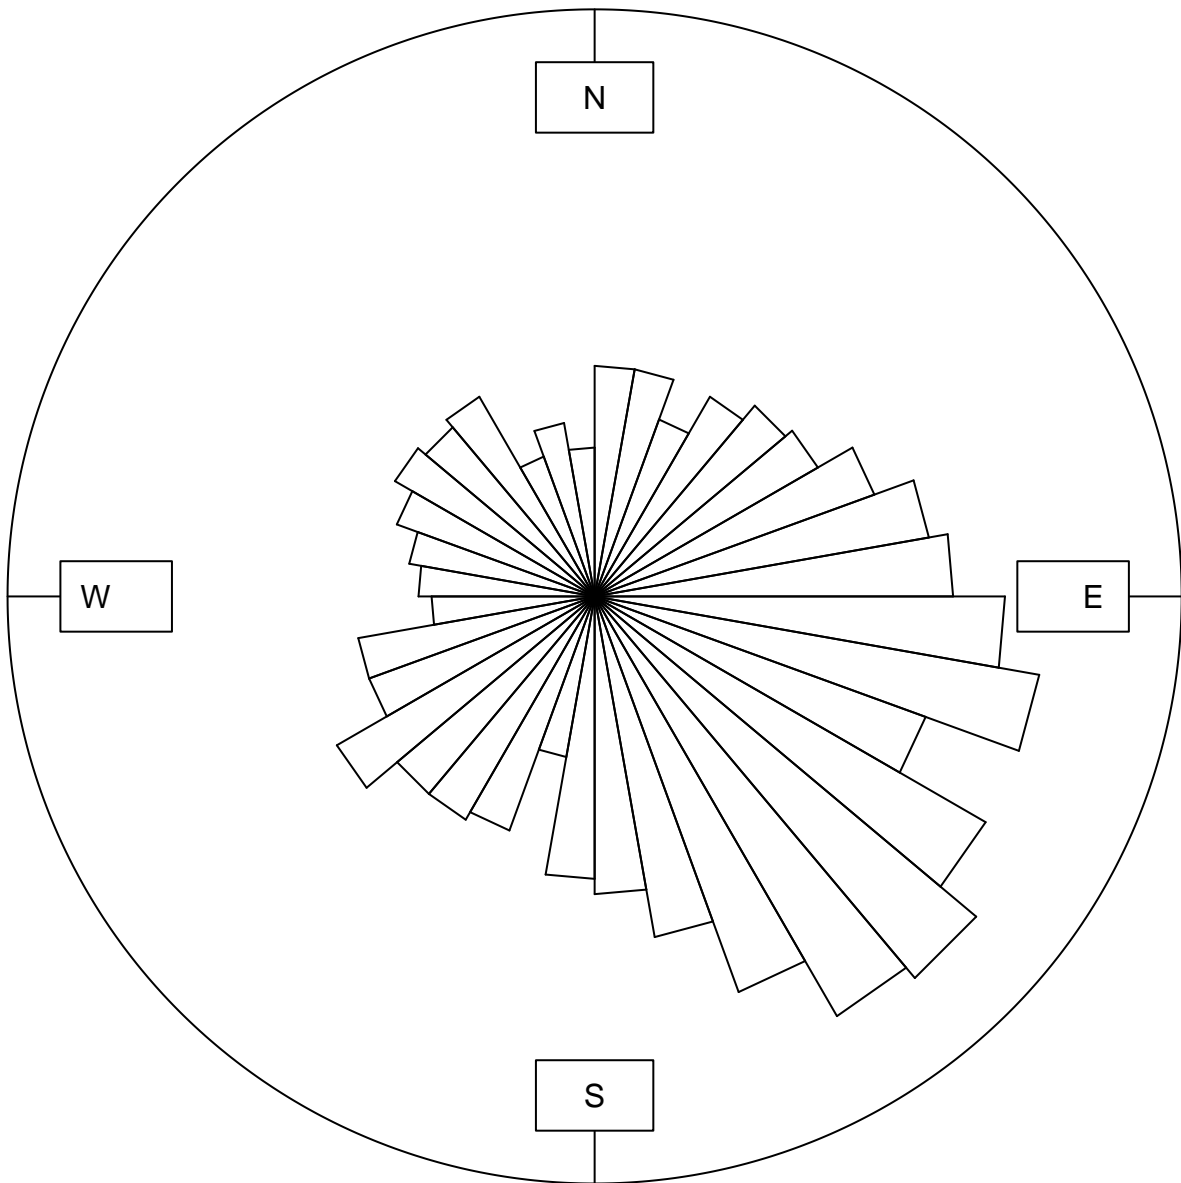

# bootstrap 765

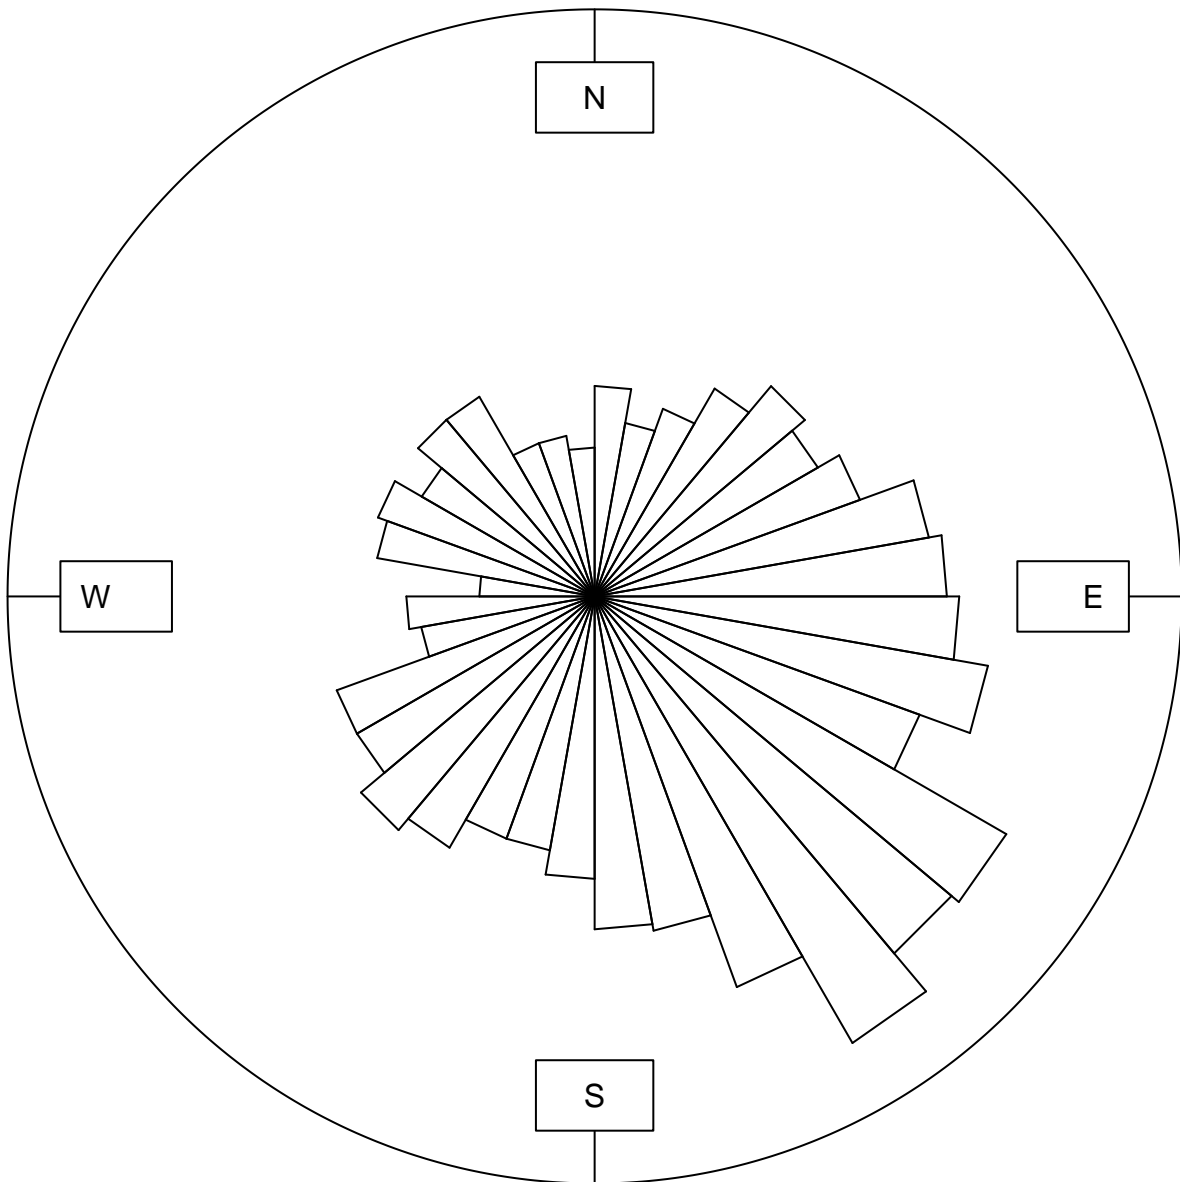

# bootstrap 766

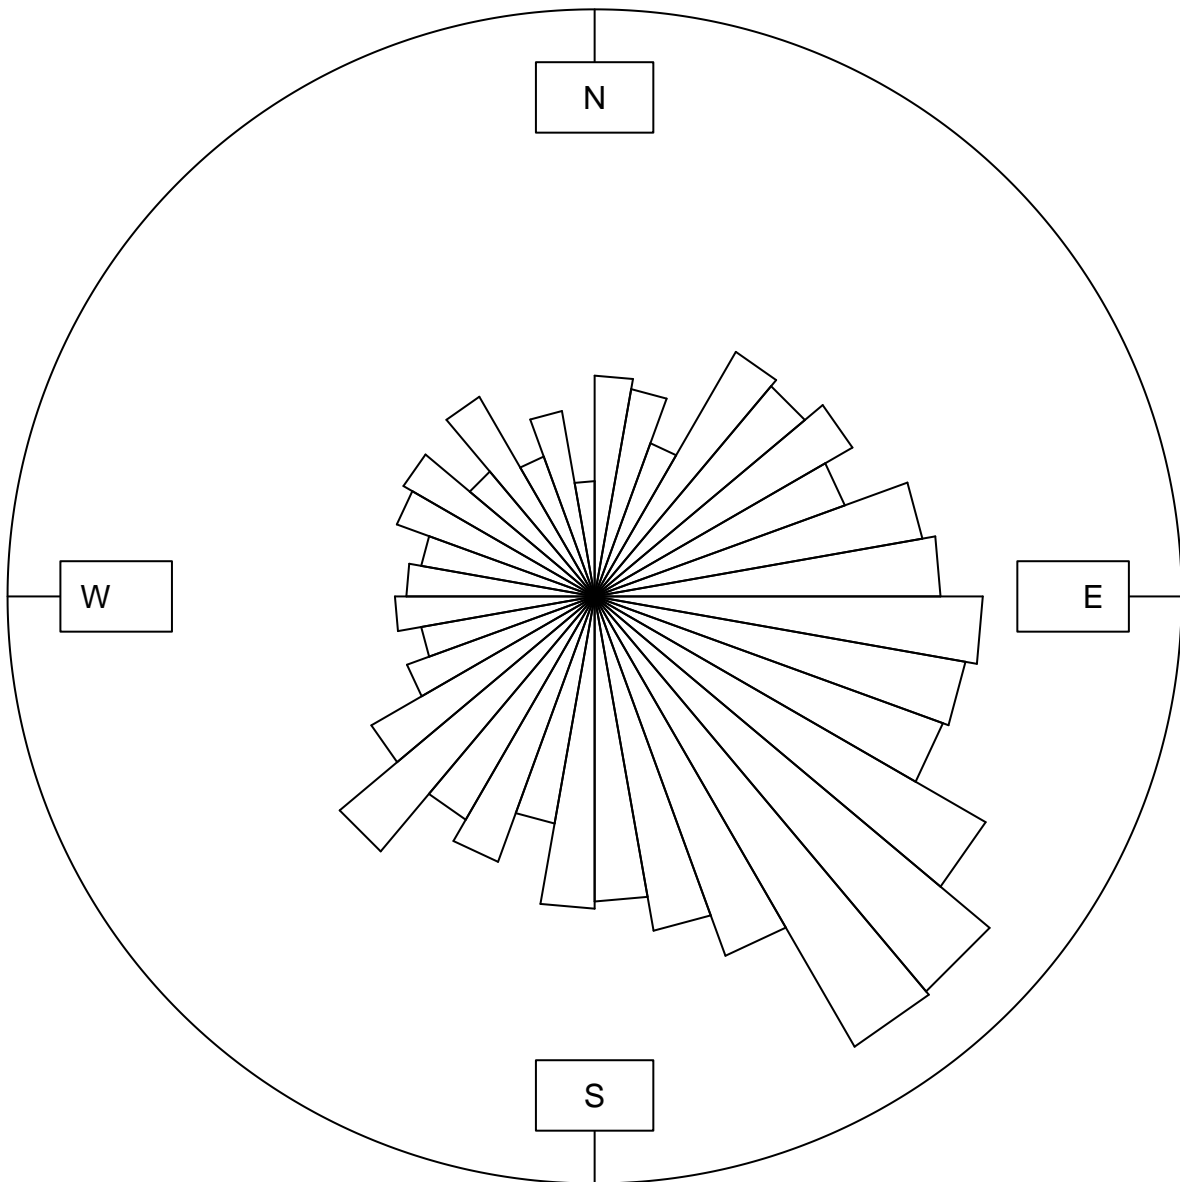

# bootstrap 767

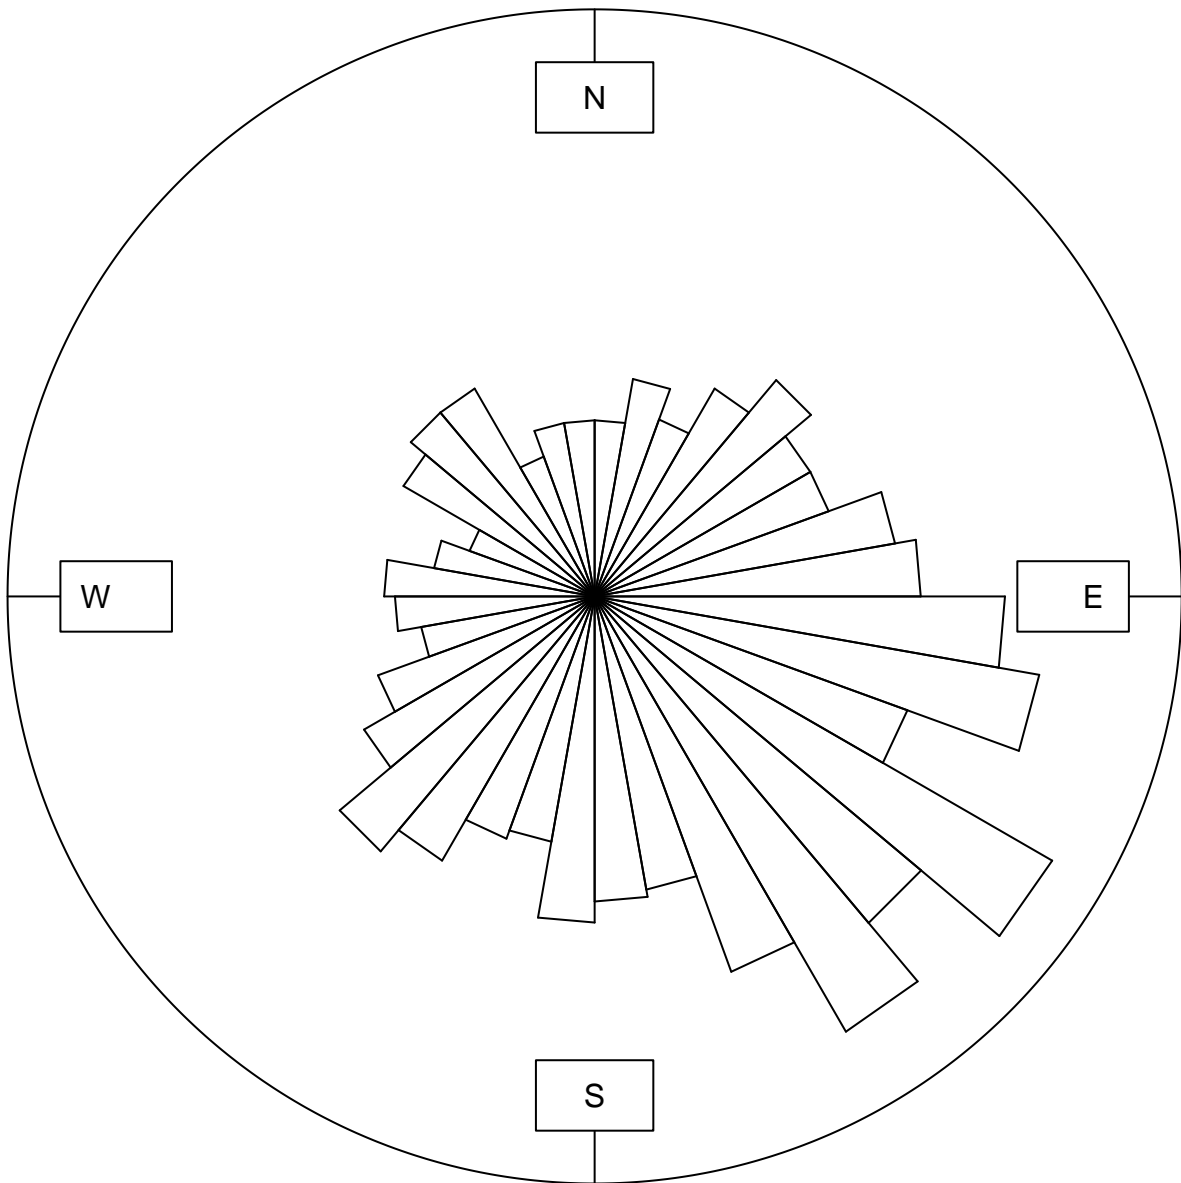

# bootstrap 768

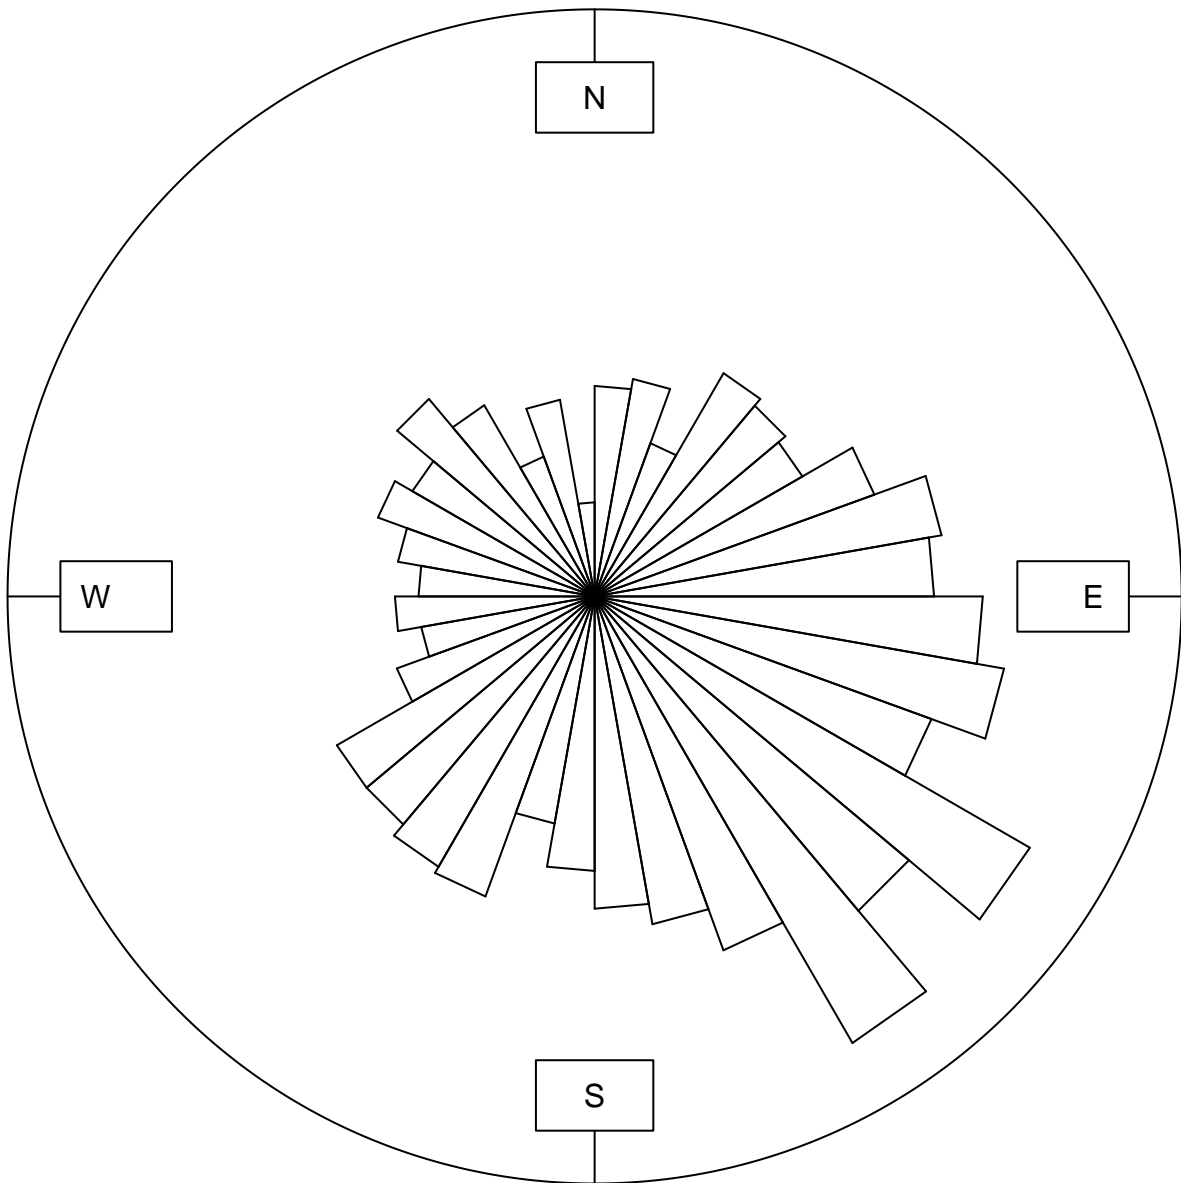



# bootstrap 769

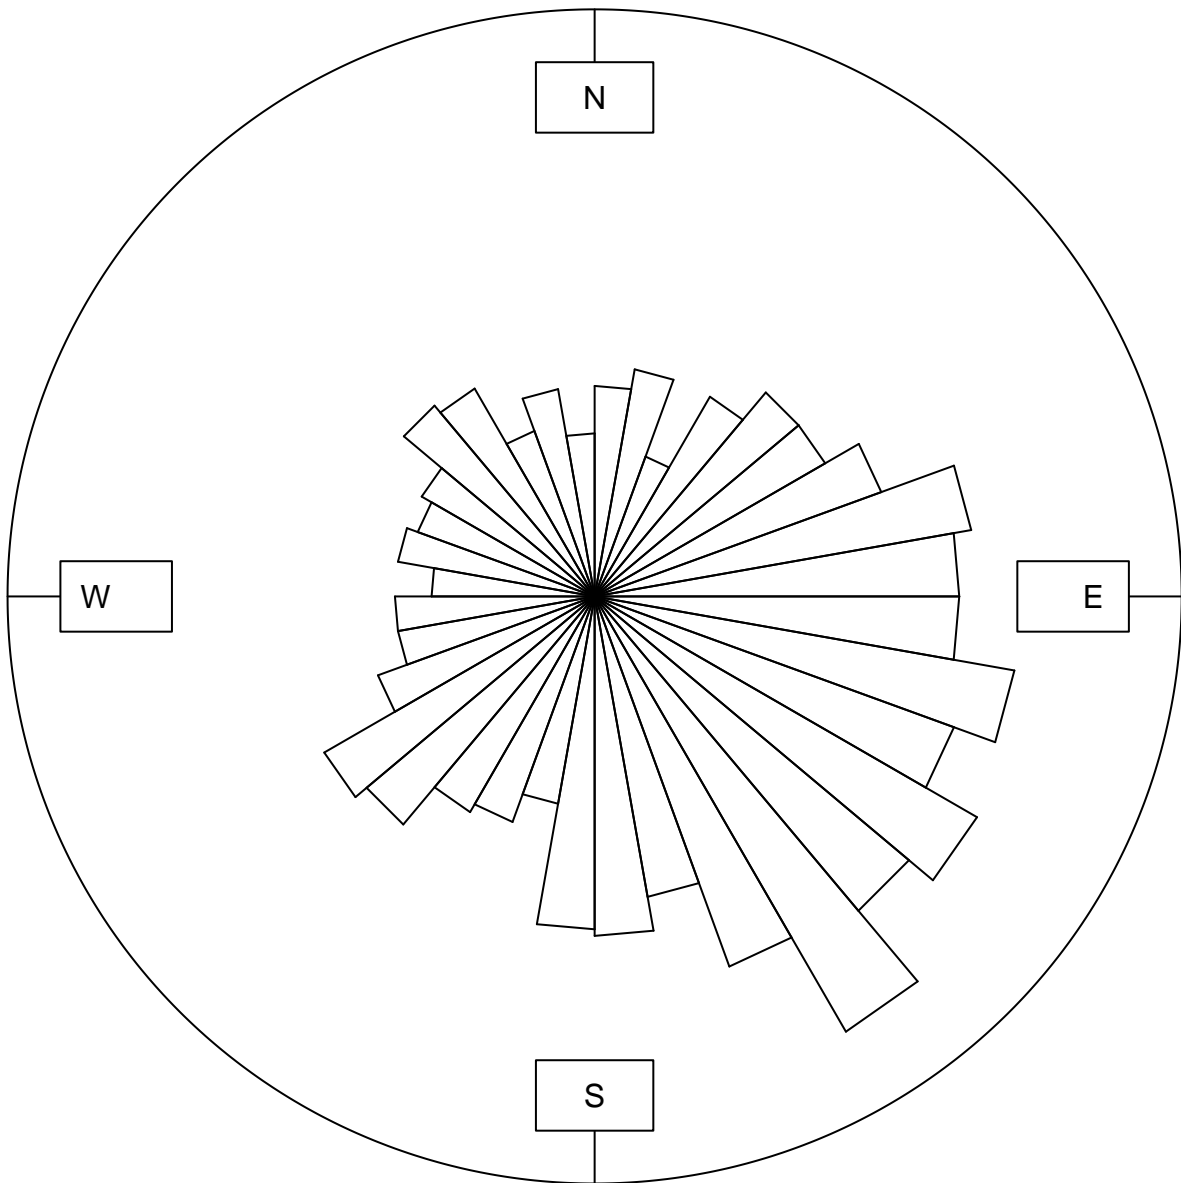

# bootstrap 770

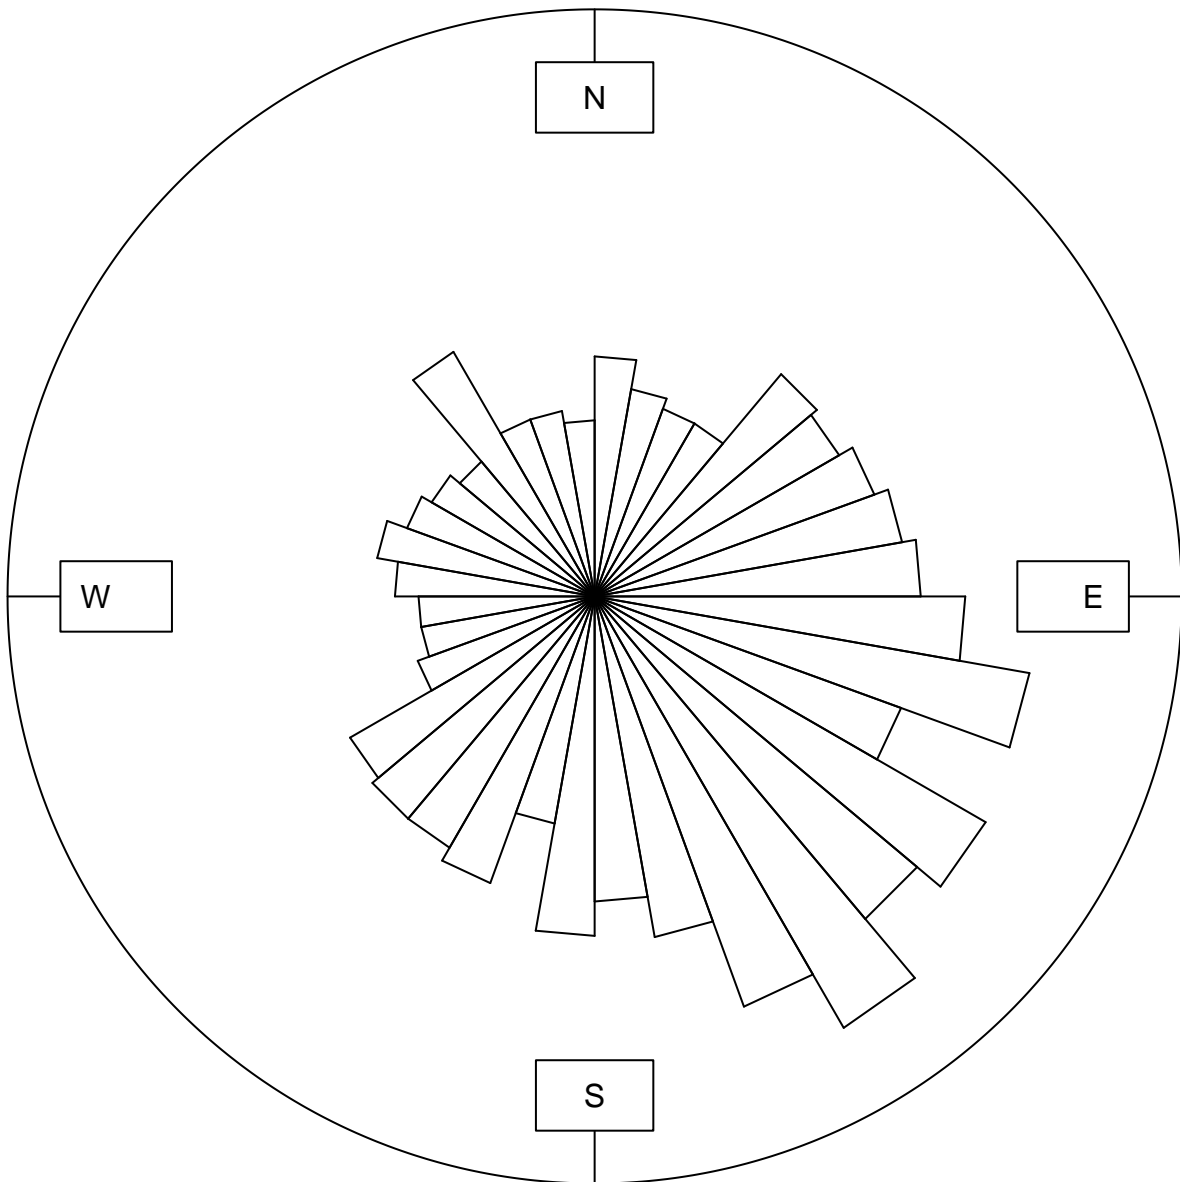

# bootstrap 771

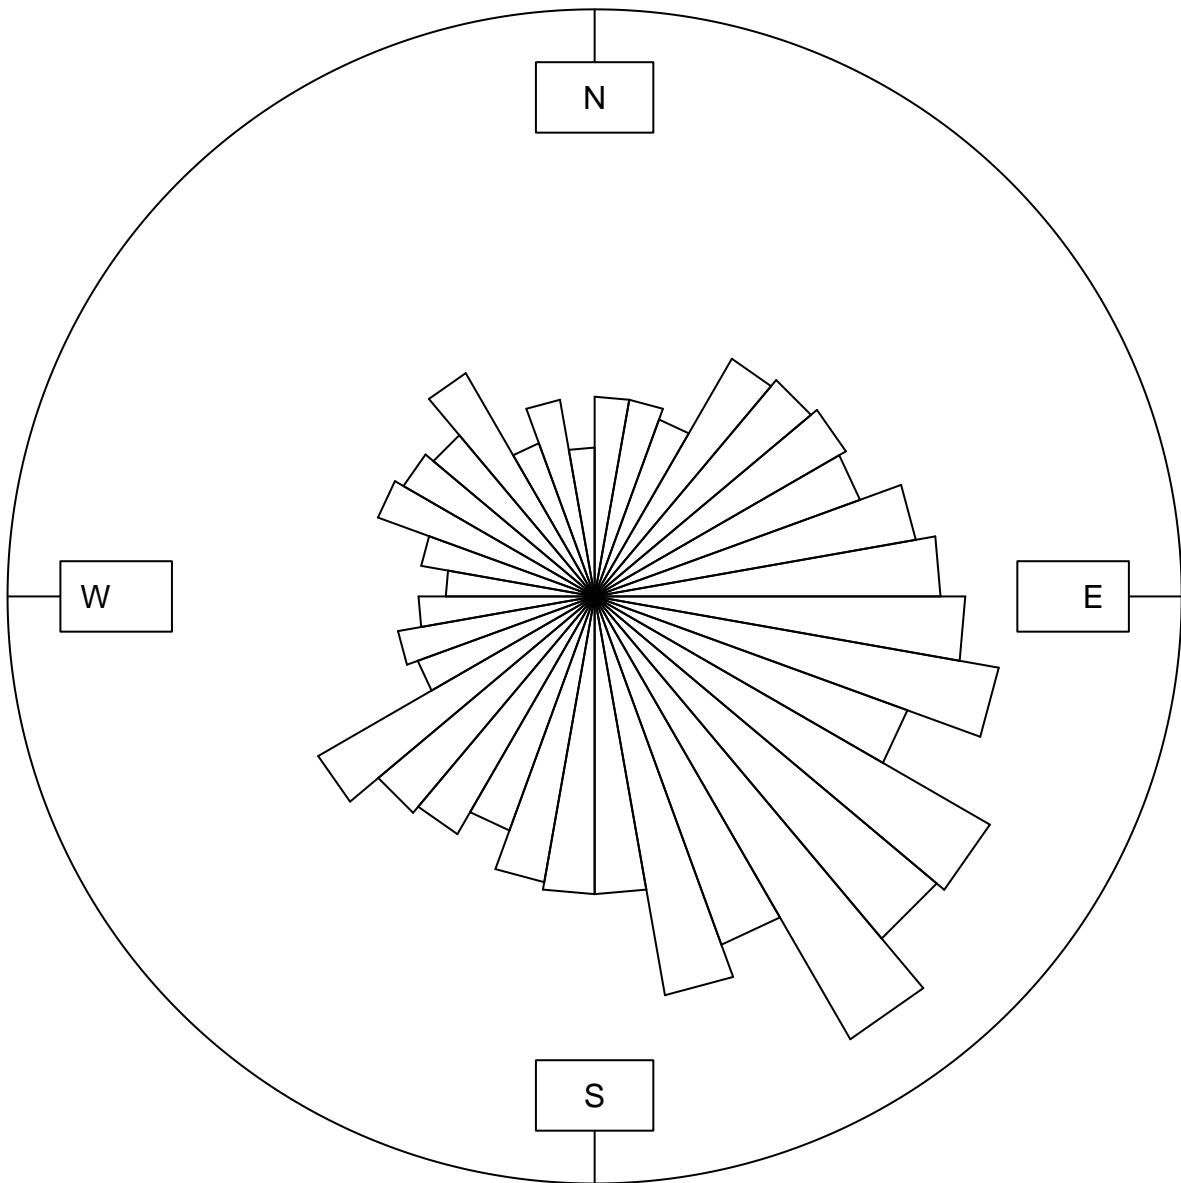

# bootstrap 772

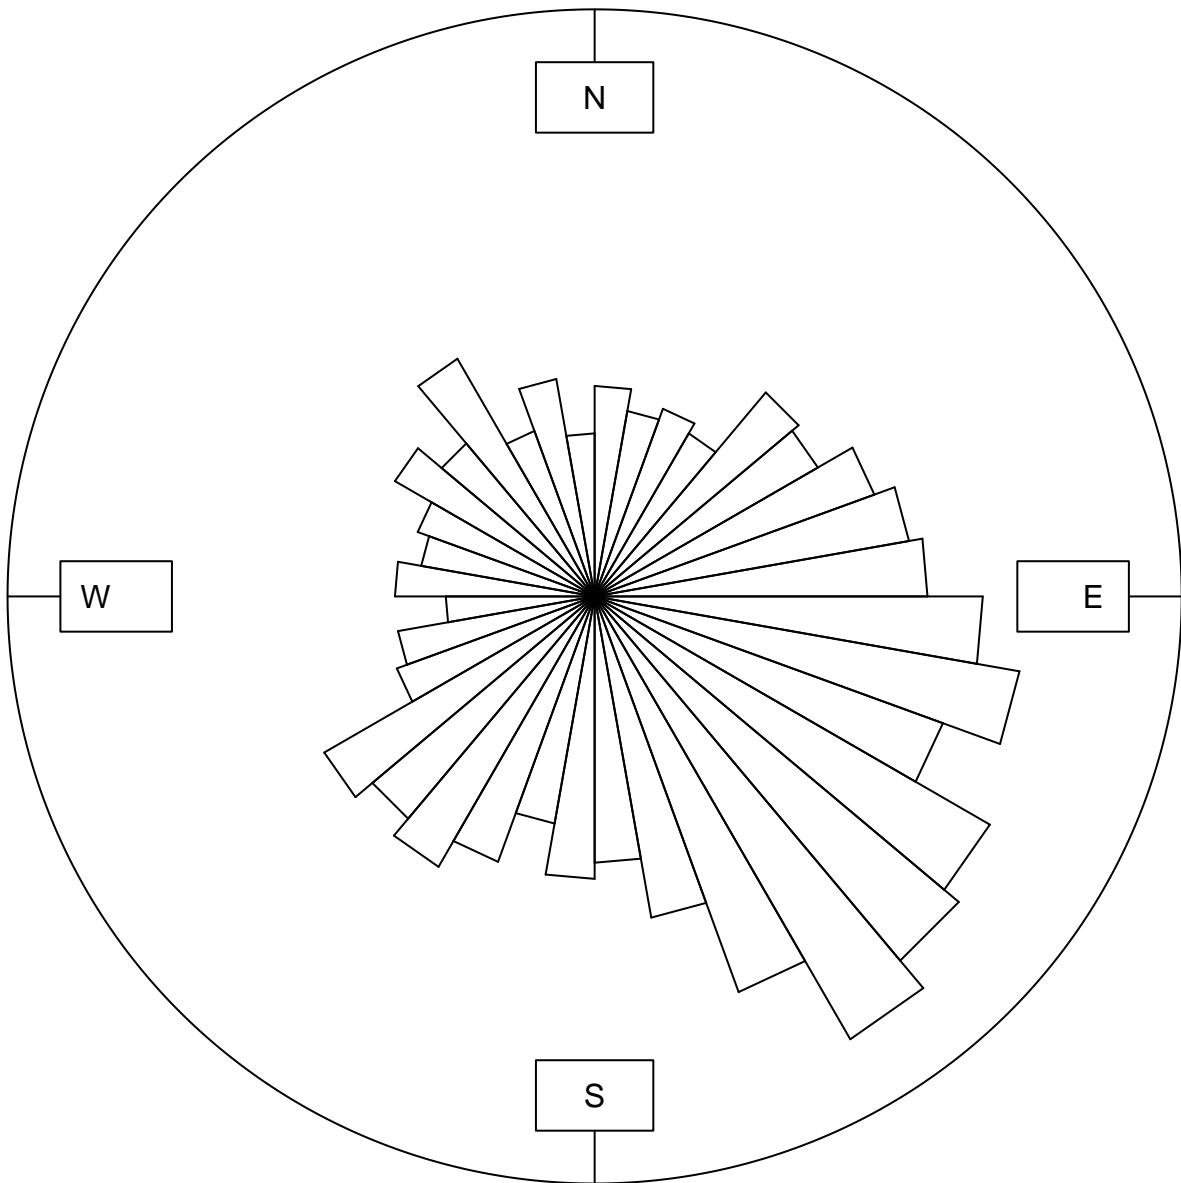

# bootstrap 773

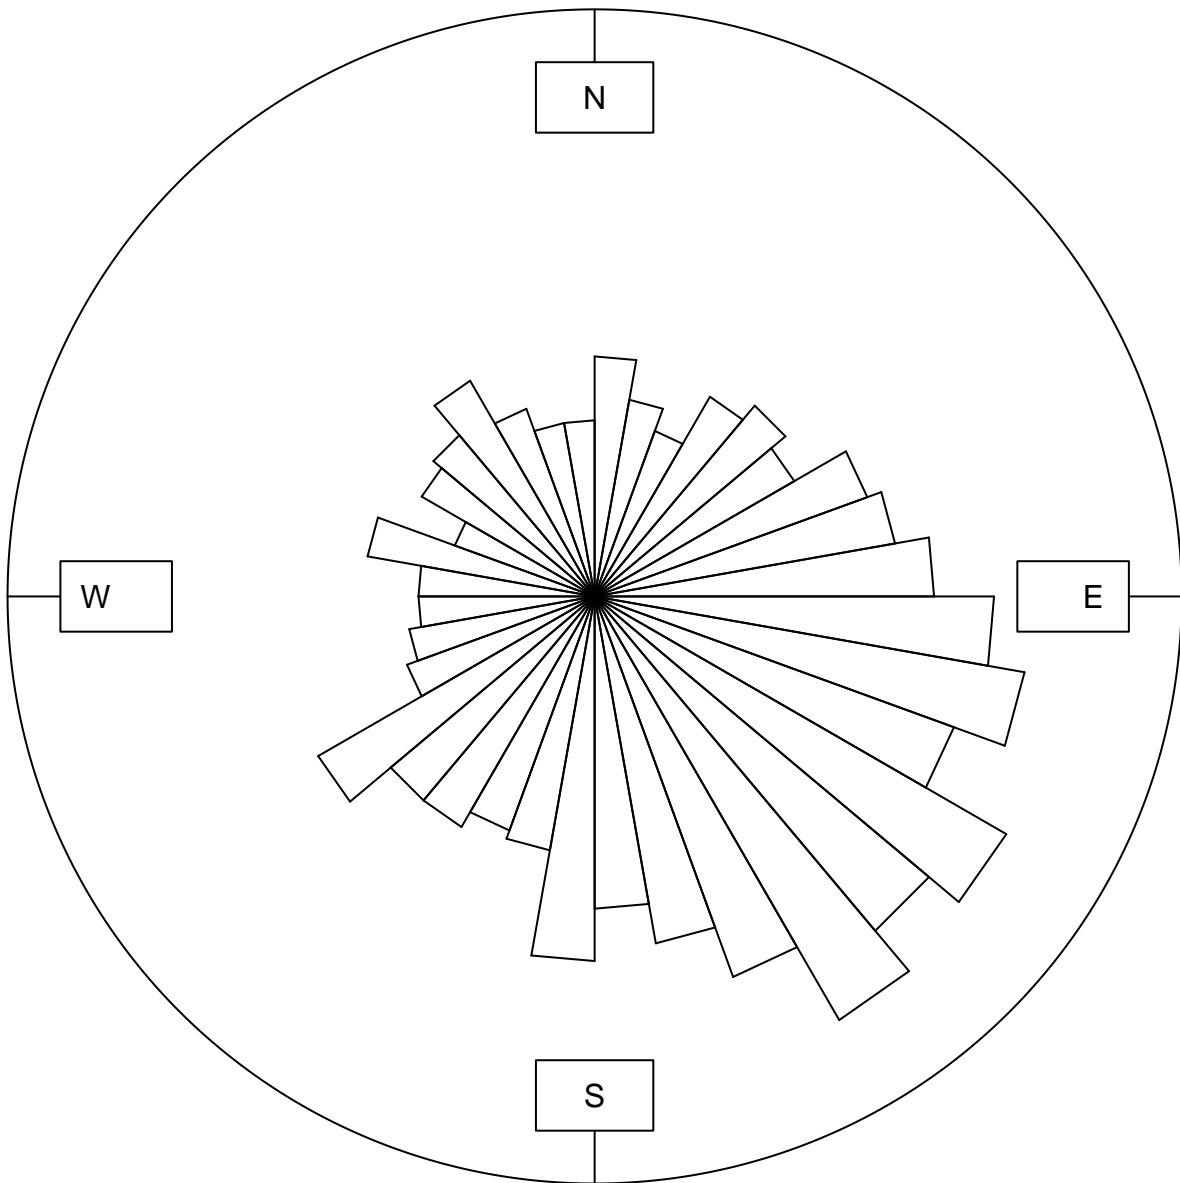

# bootstrap 774

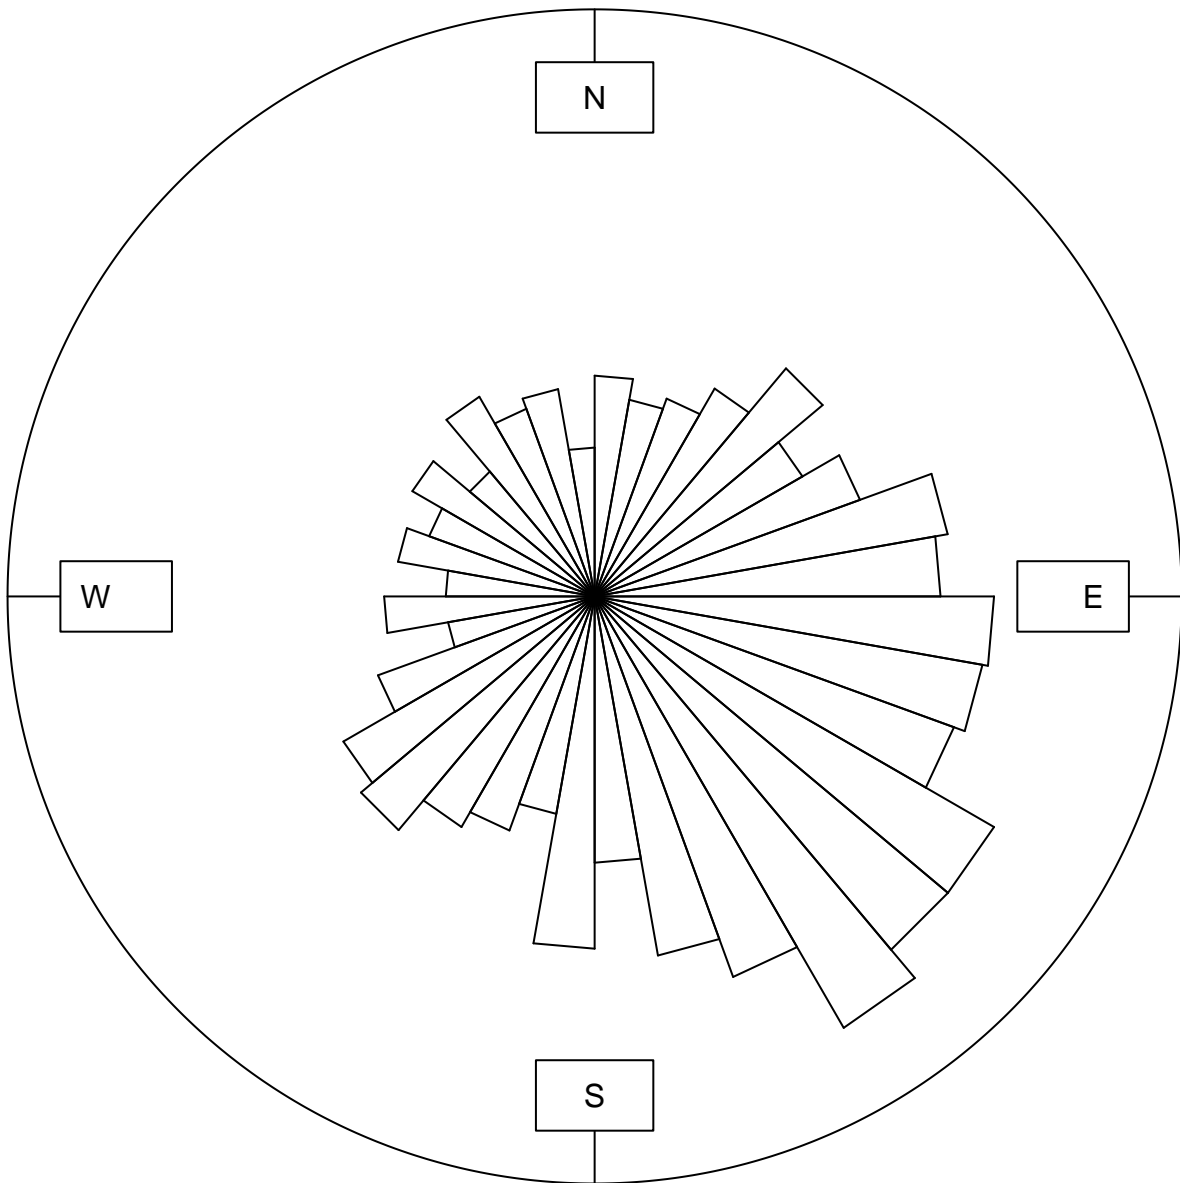

# bootstrap 775

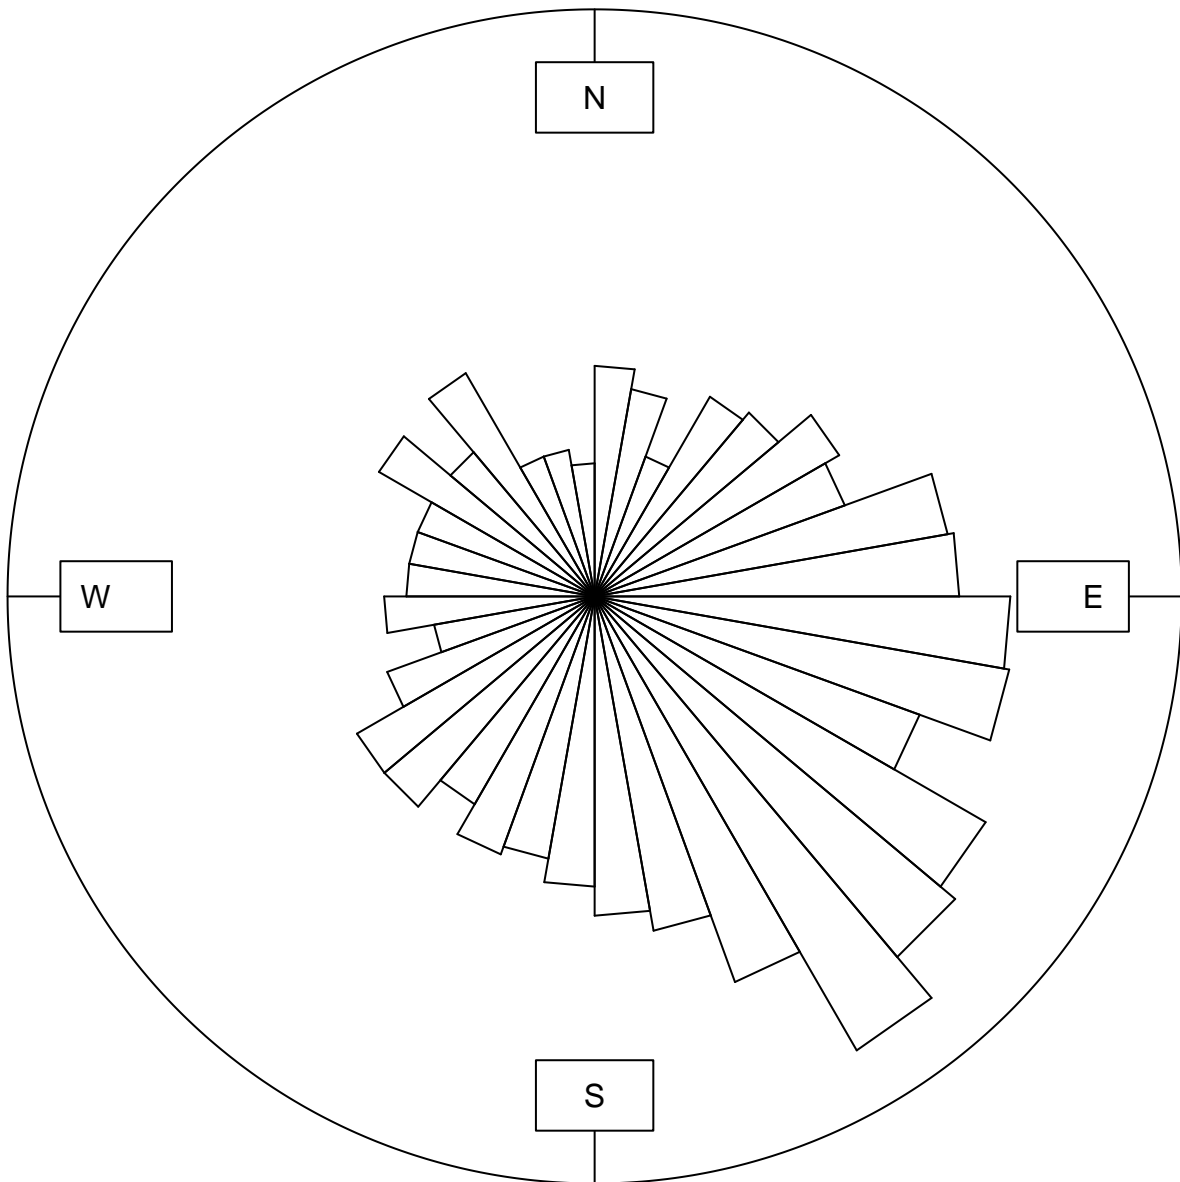

# bootstrap 776

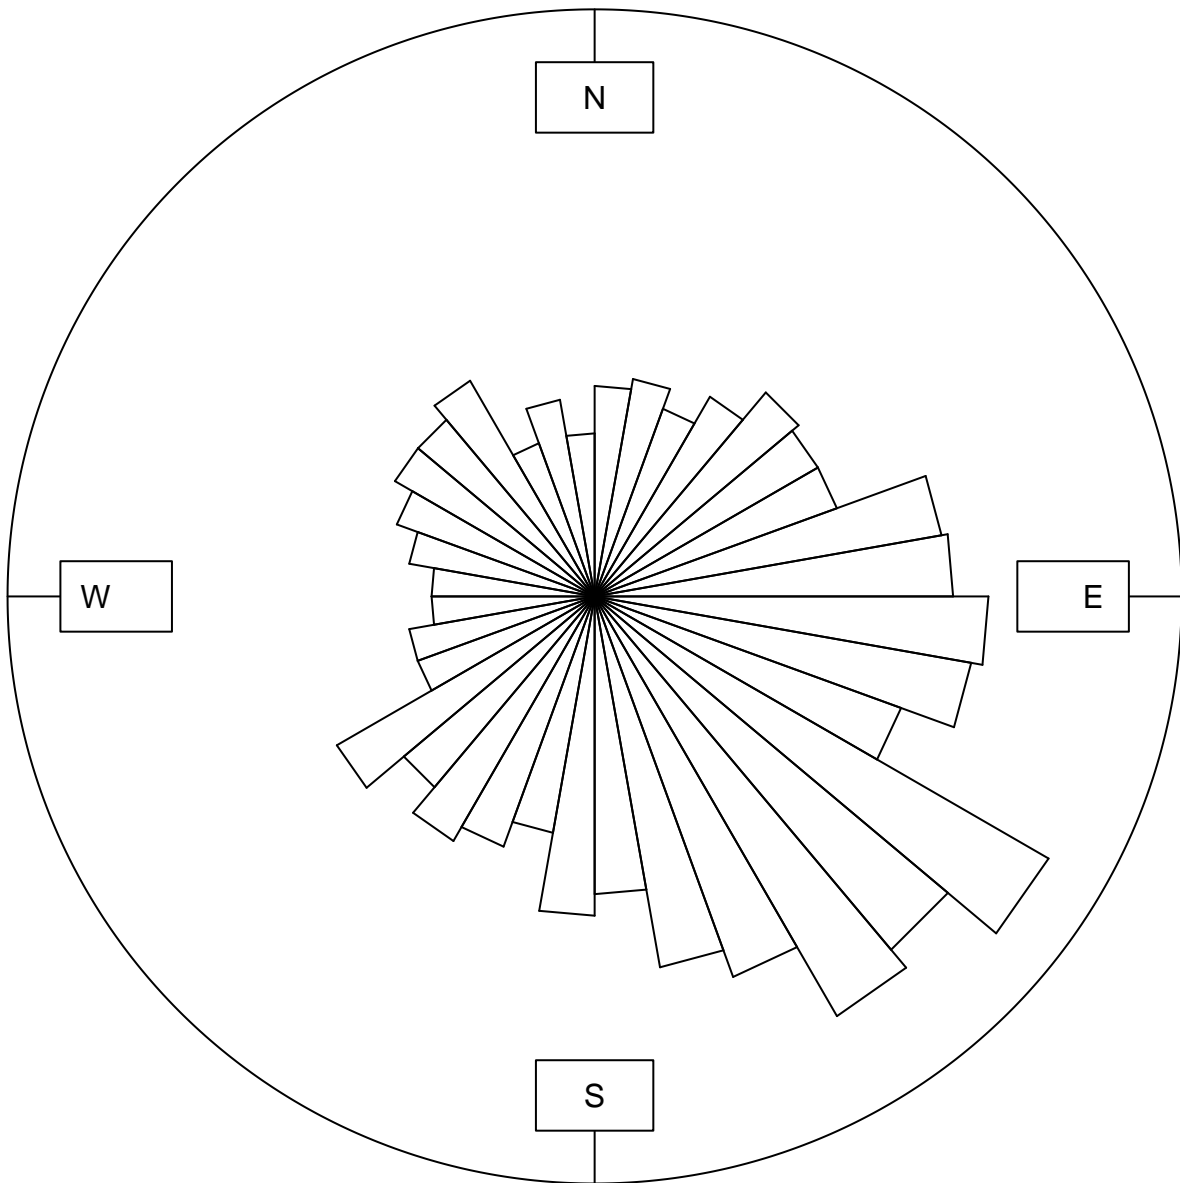



# bootstrap 777

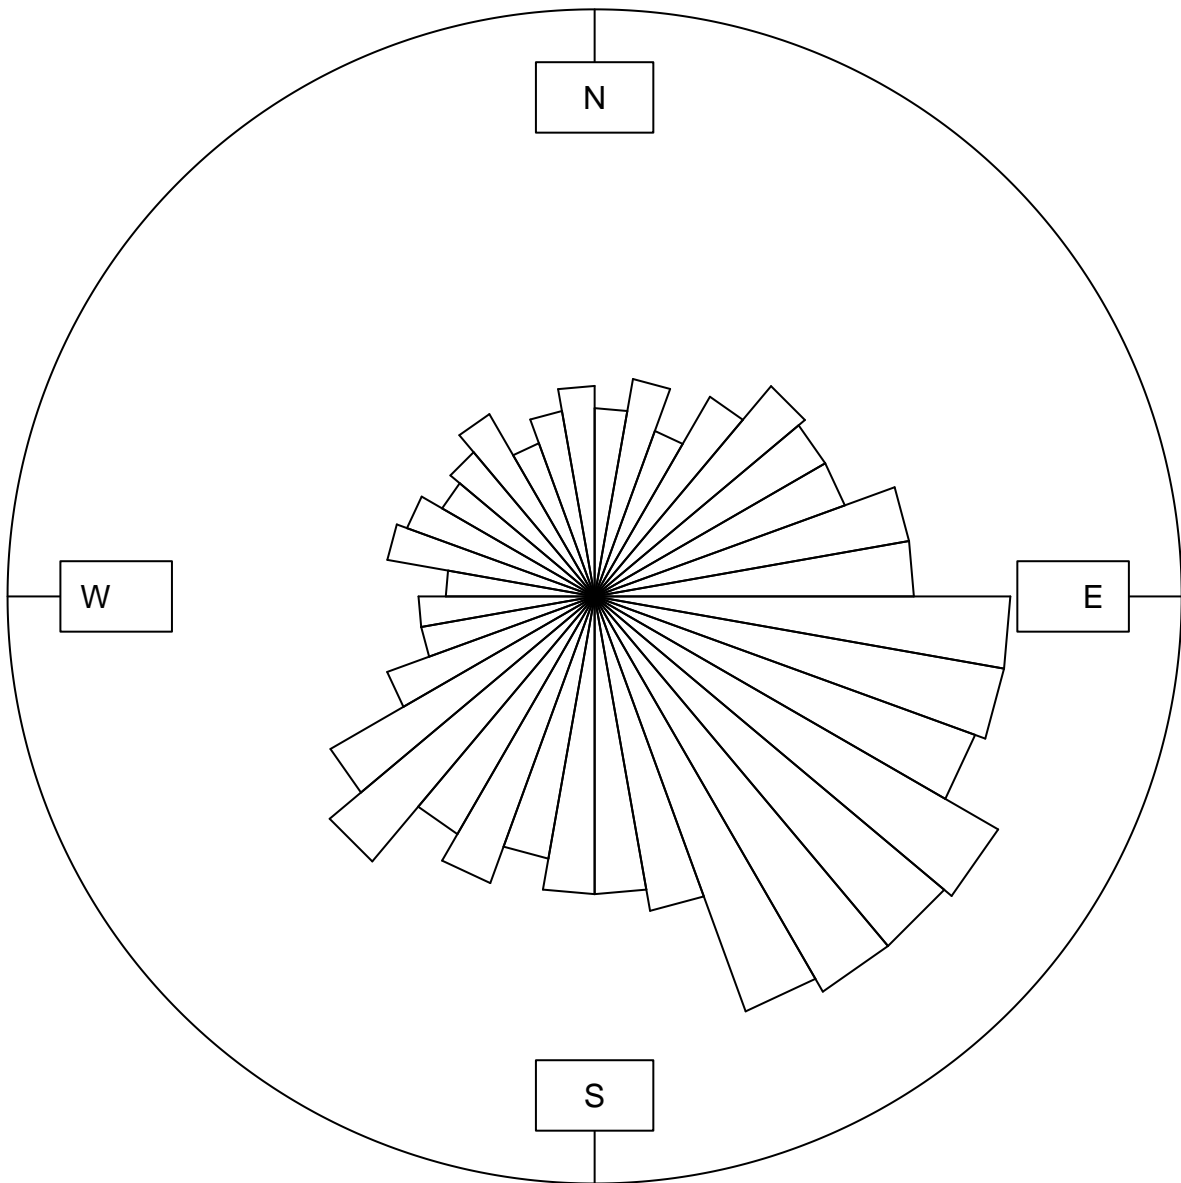

# bootstrap 778

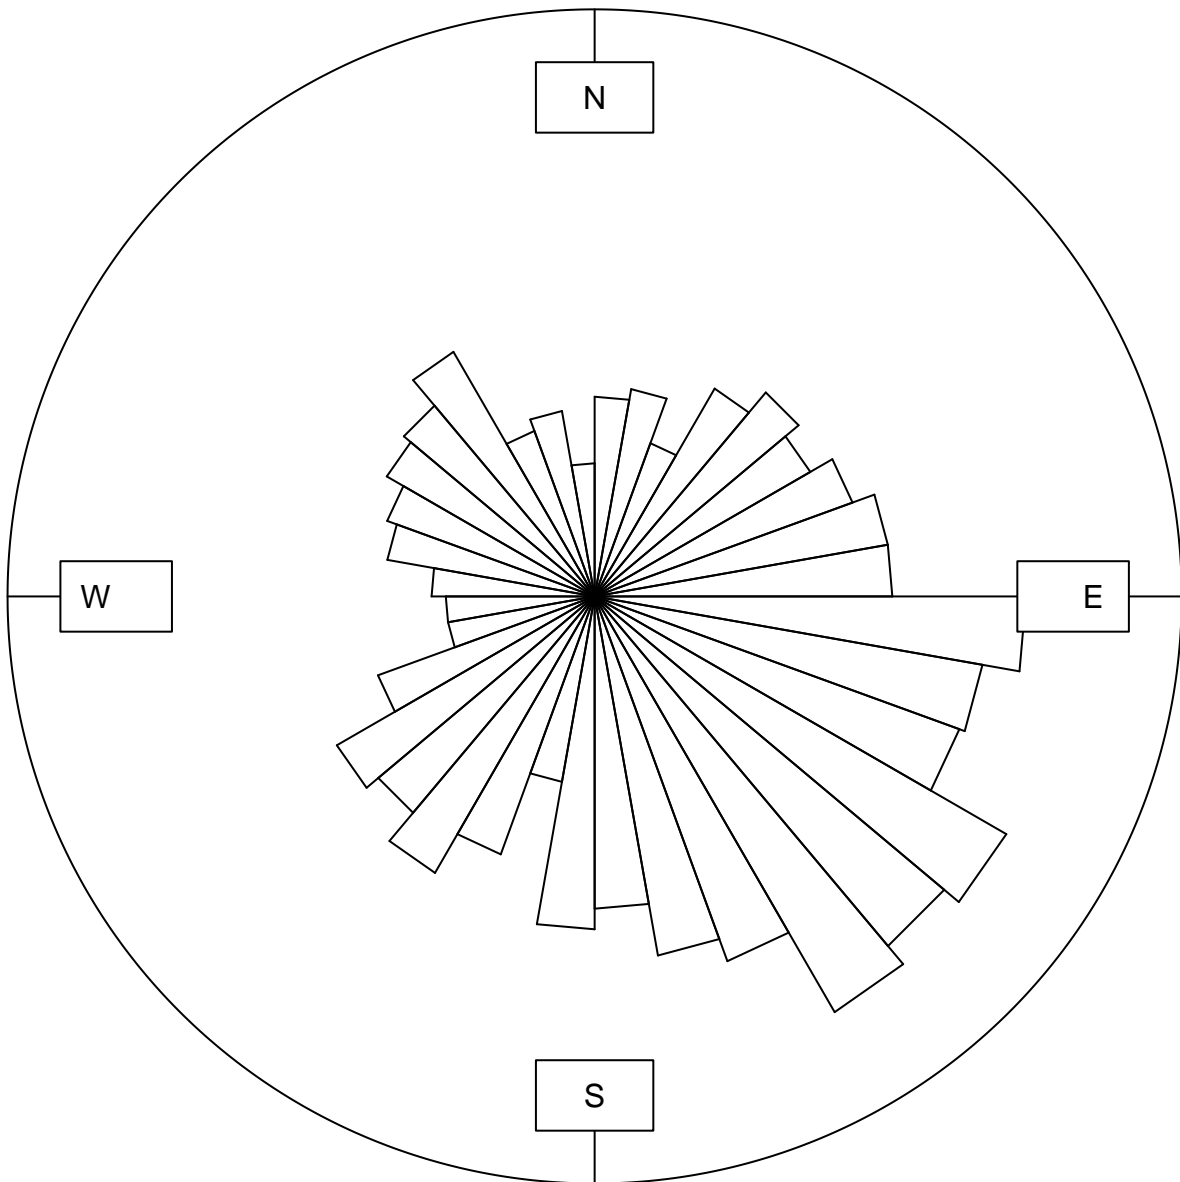

# bootstrap 779

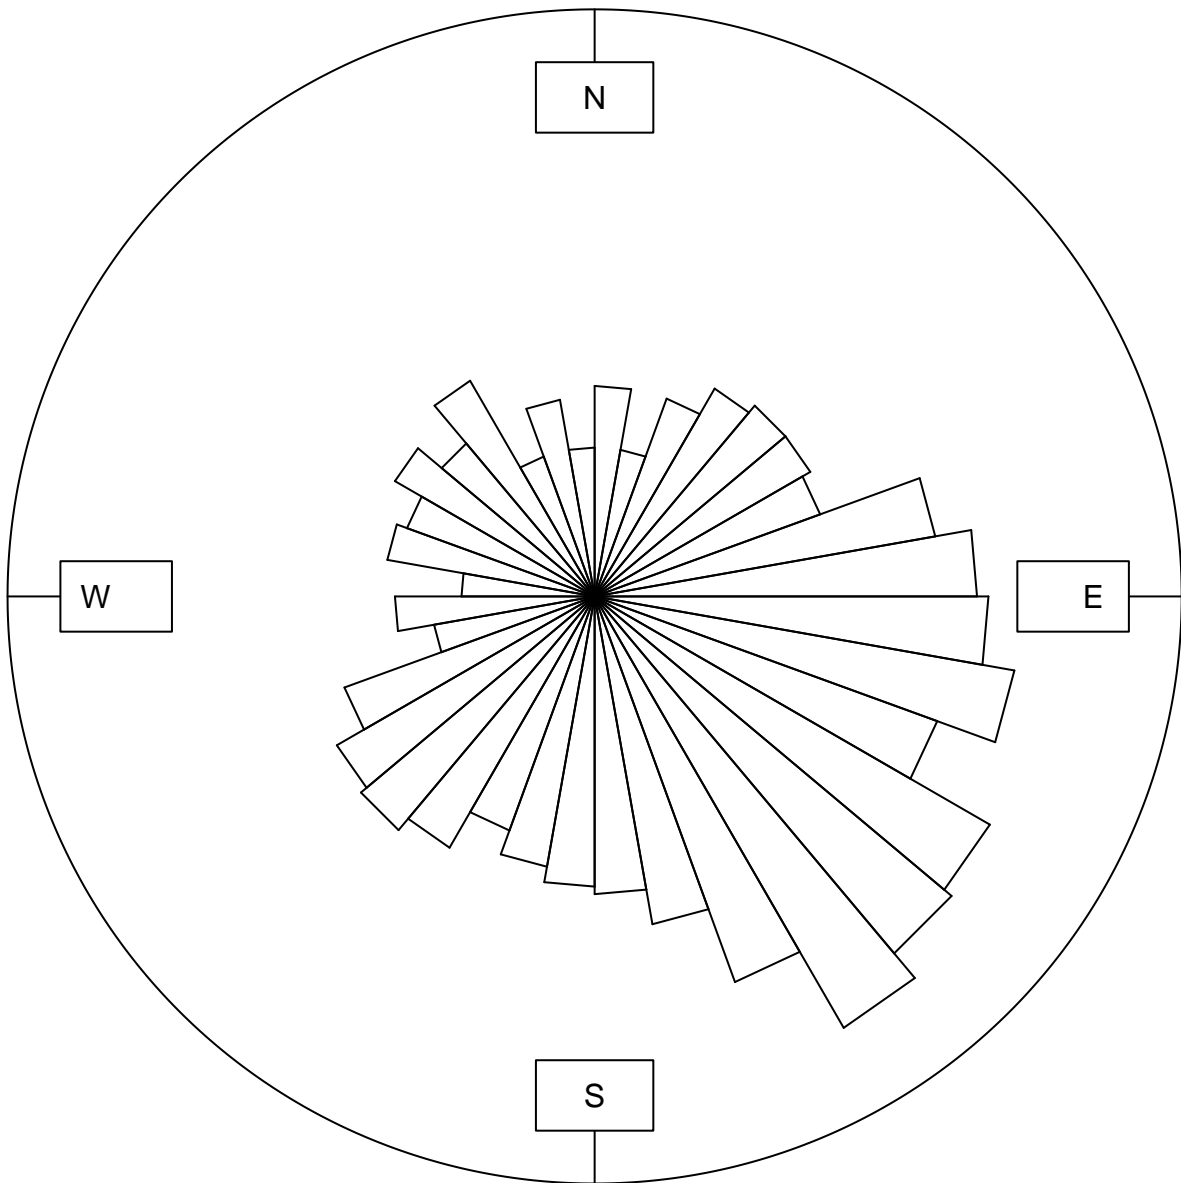

# bootstrap 780

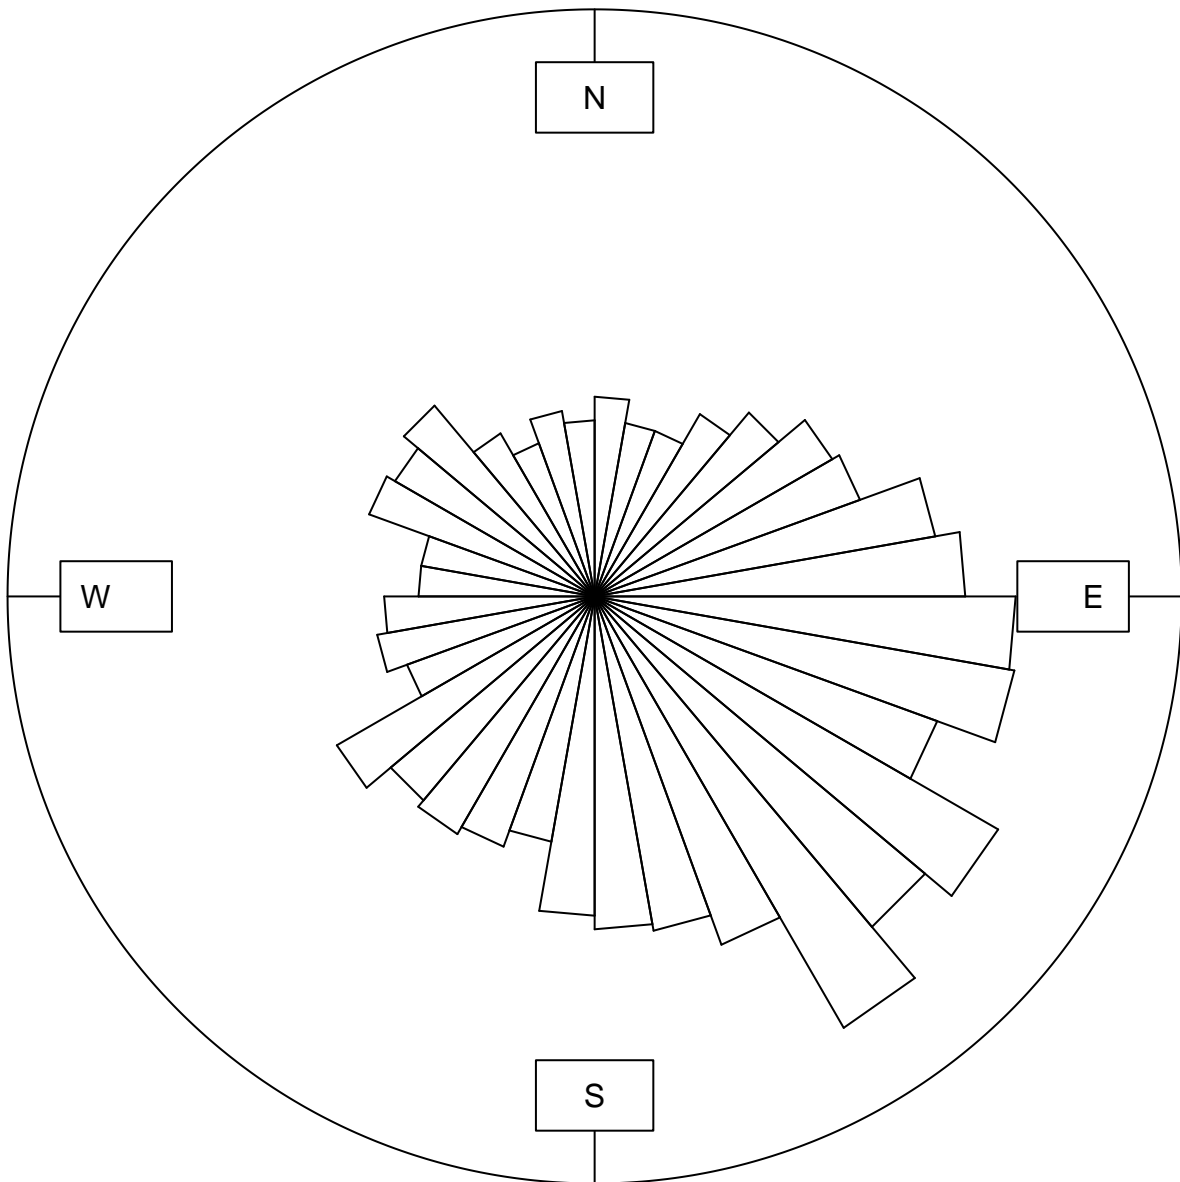

# bootstrap 781

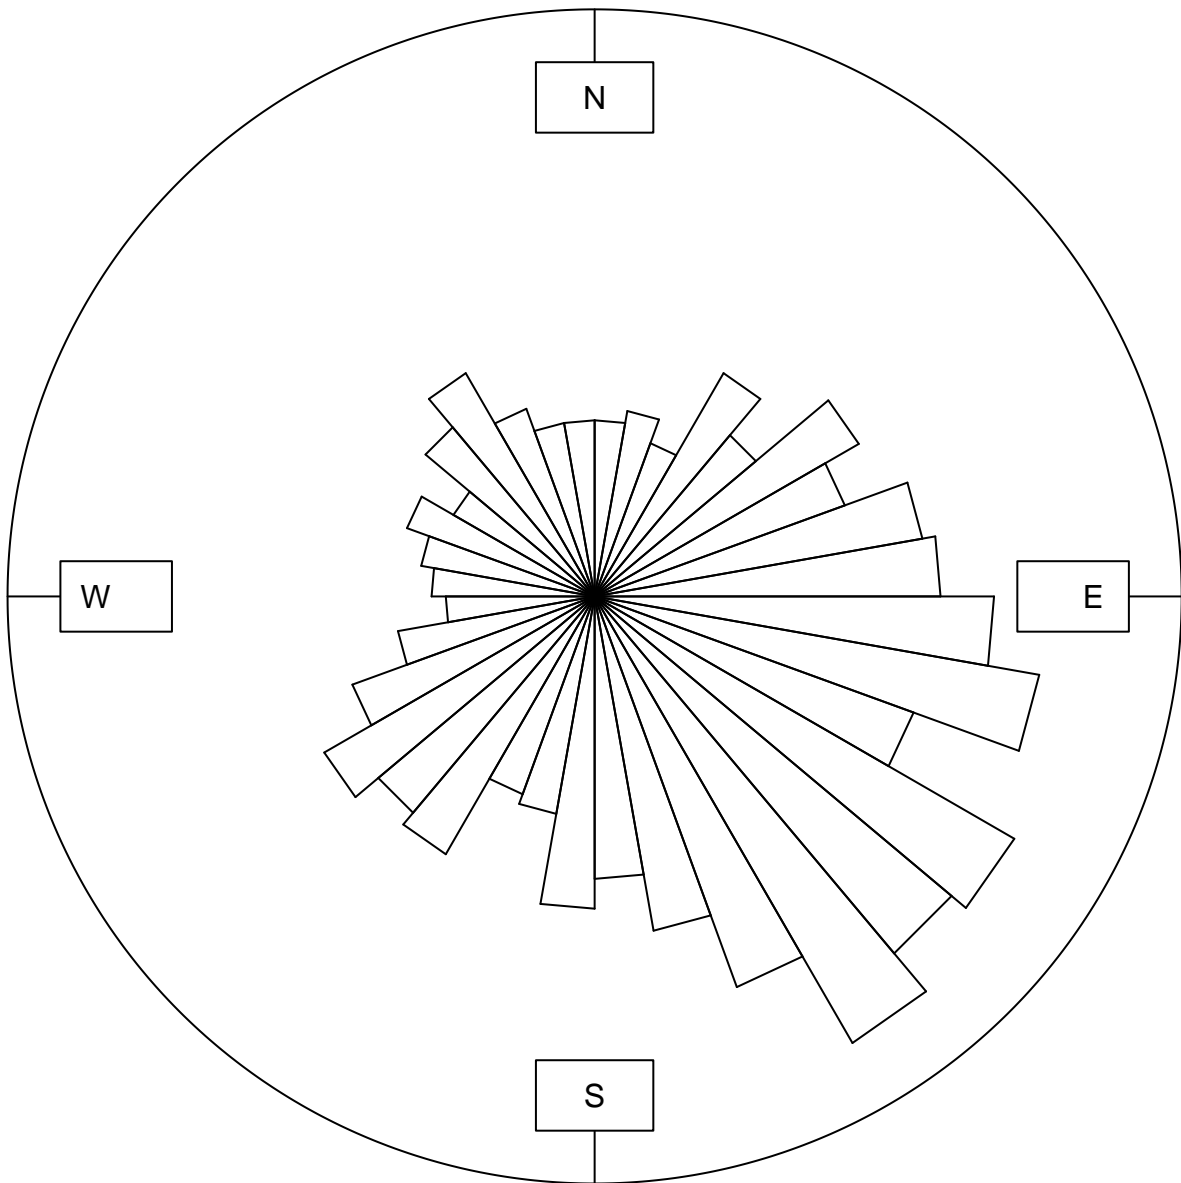

# bootstrap 782

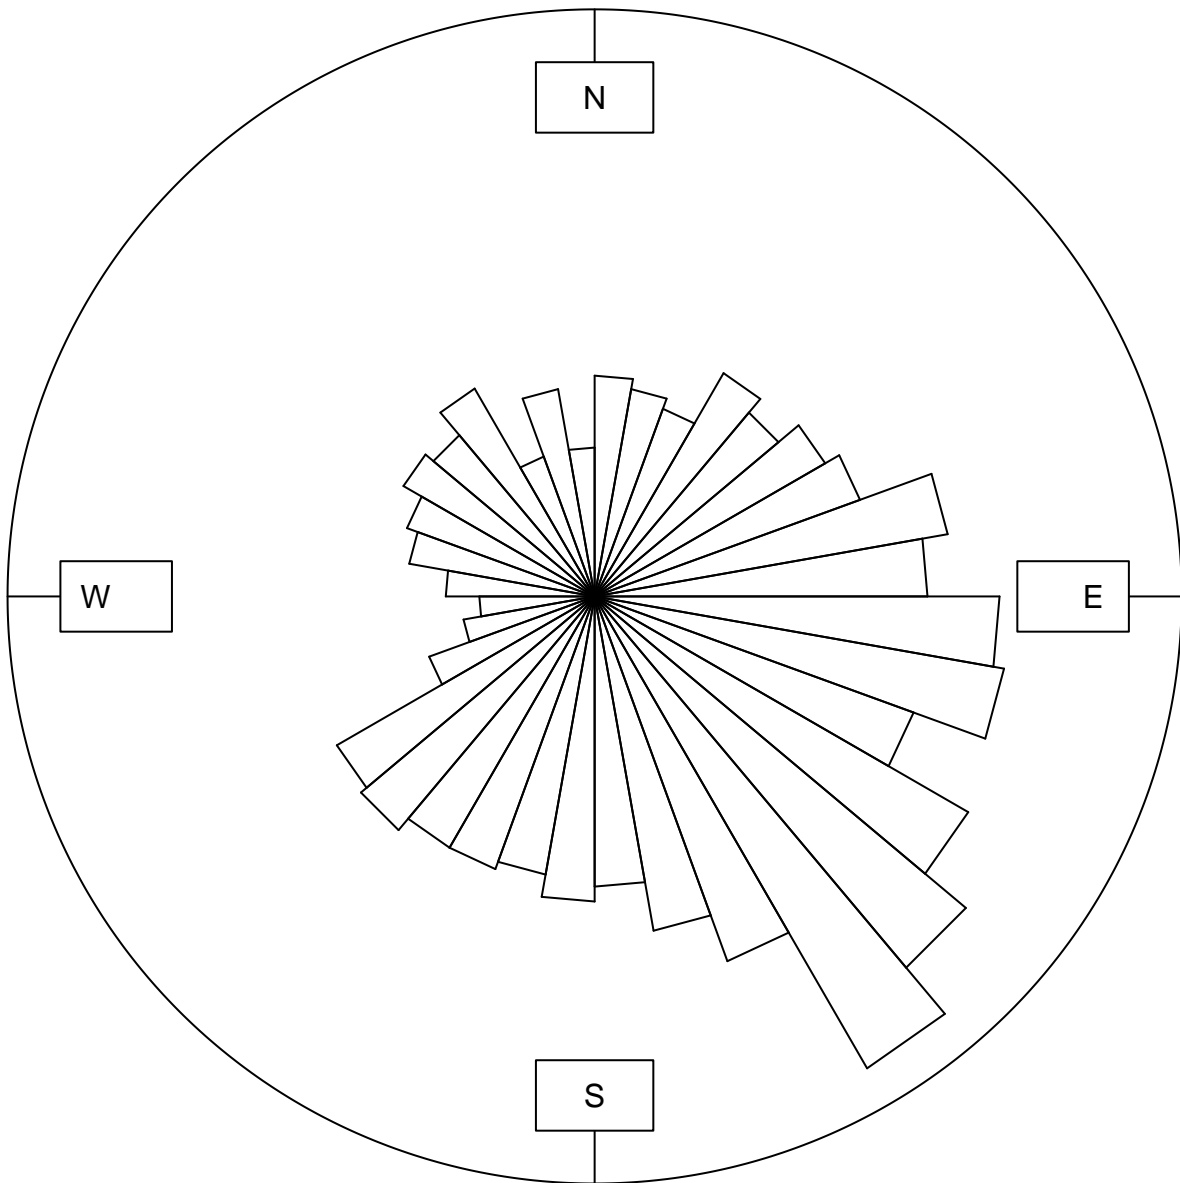

# bootstrap 783

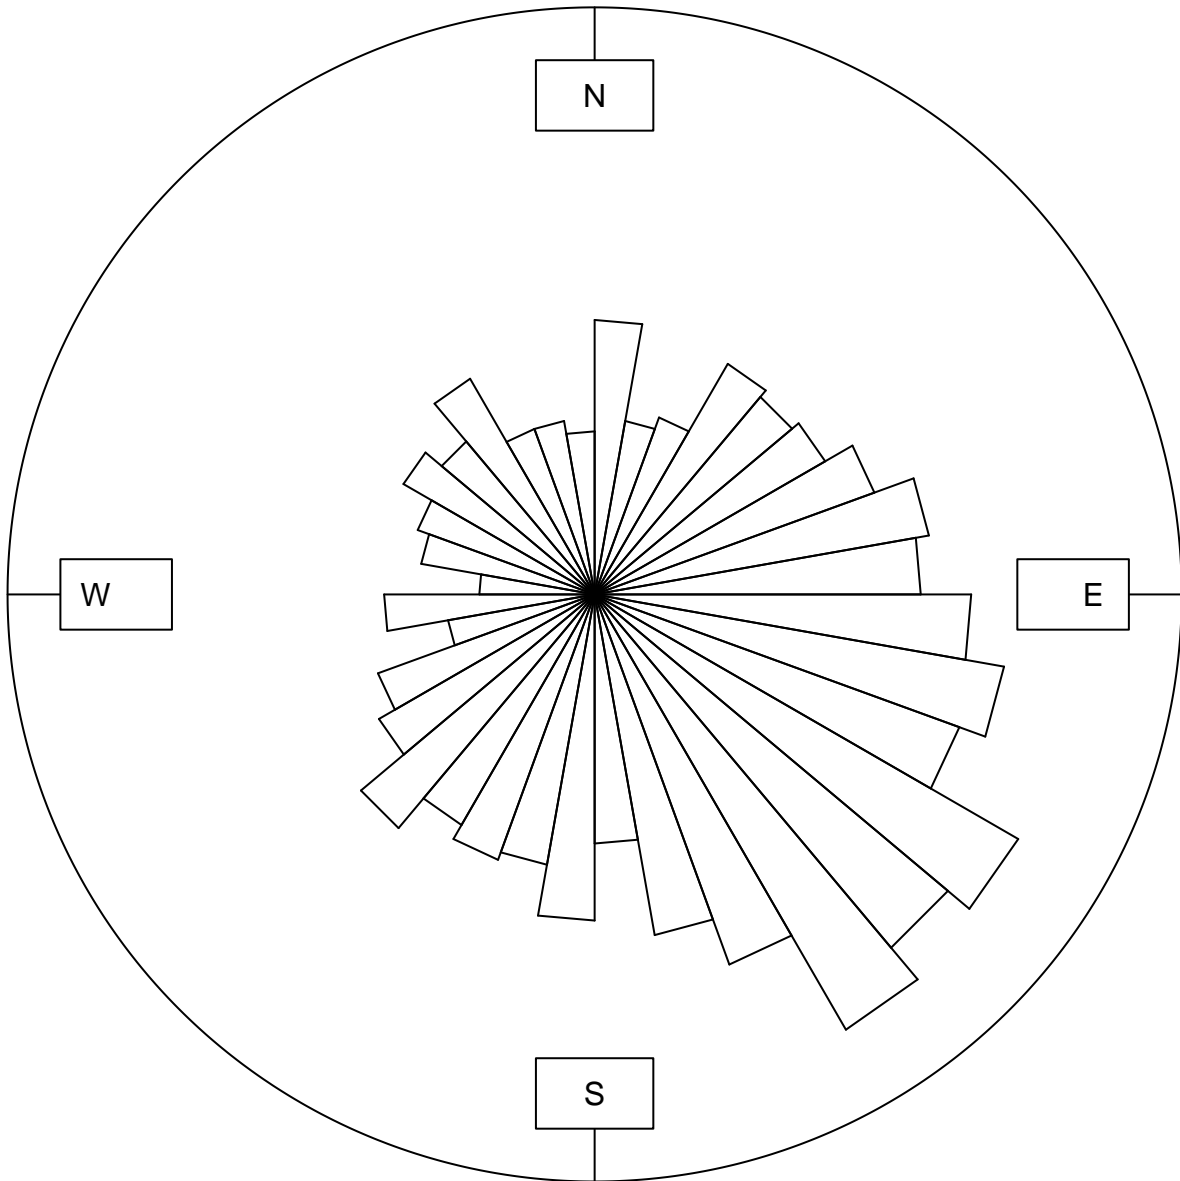

# bootstrap 784

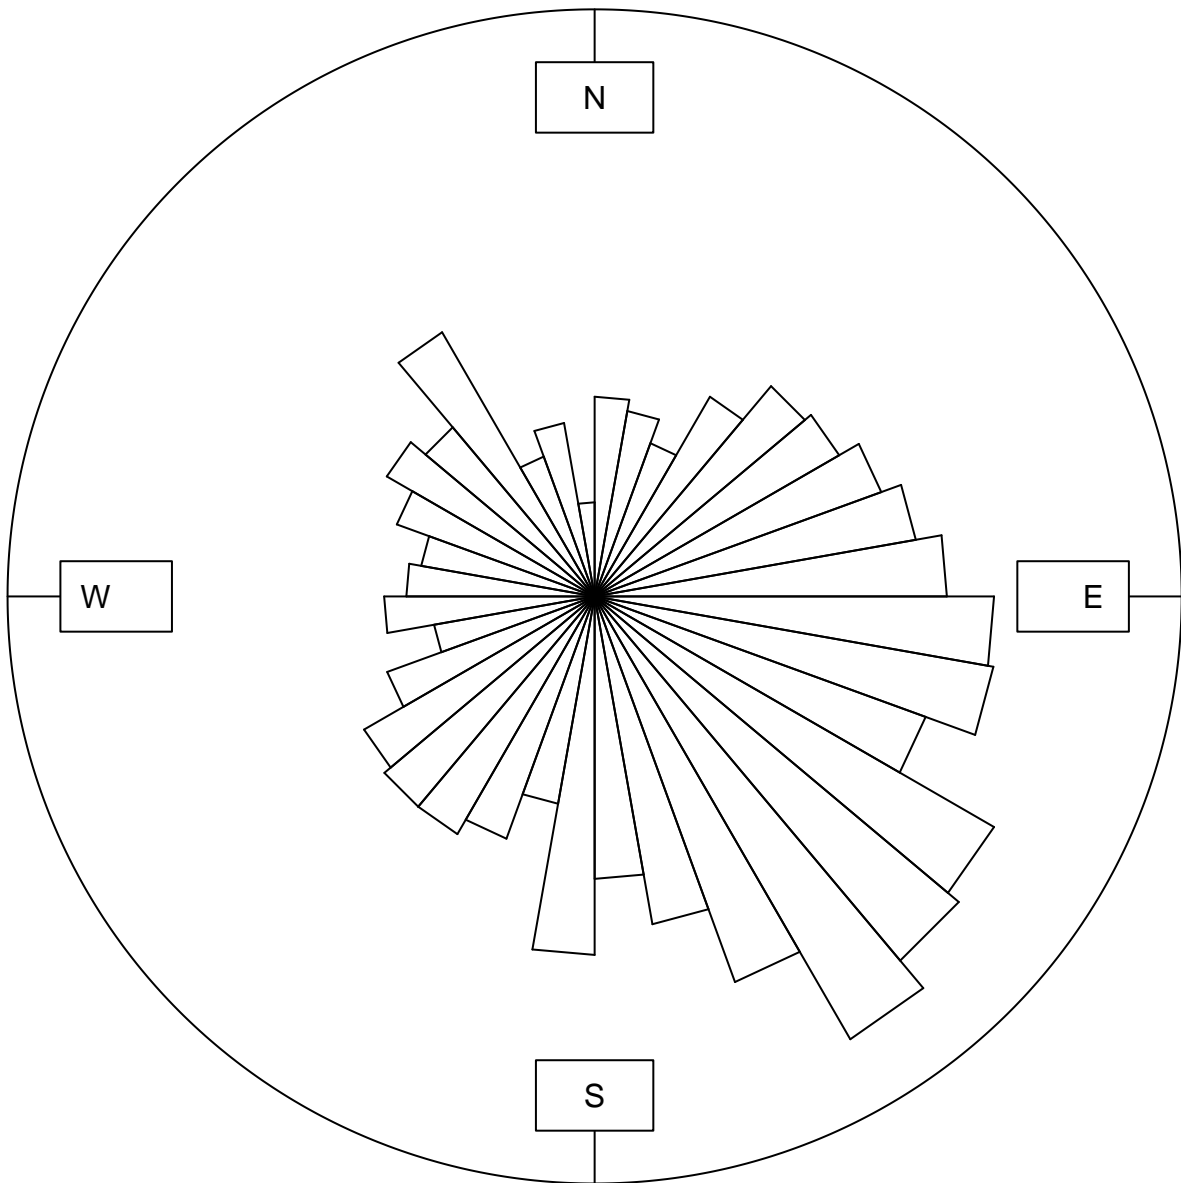



# bootstrap 785

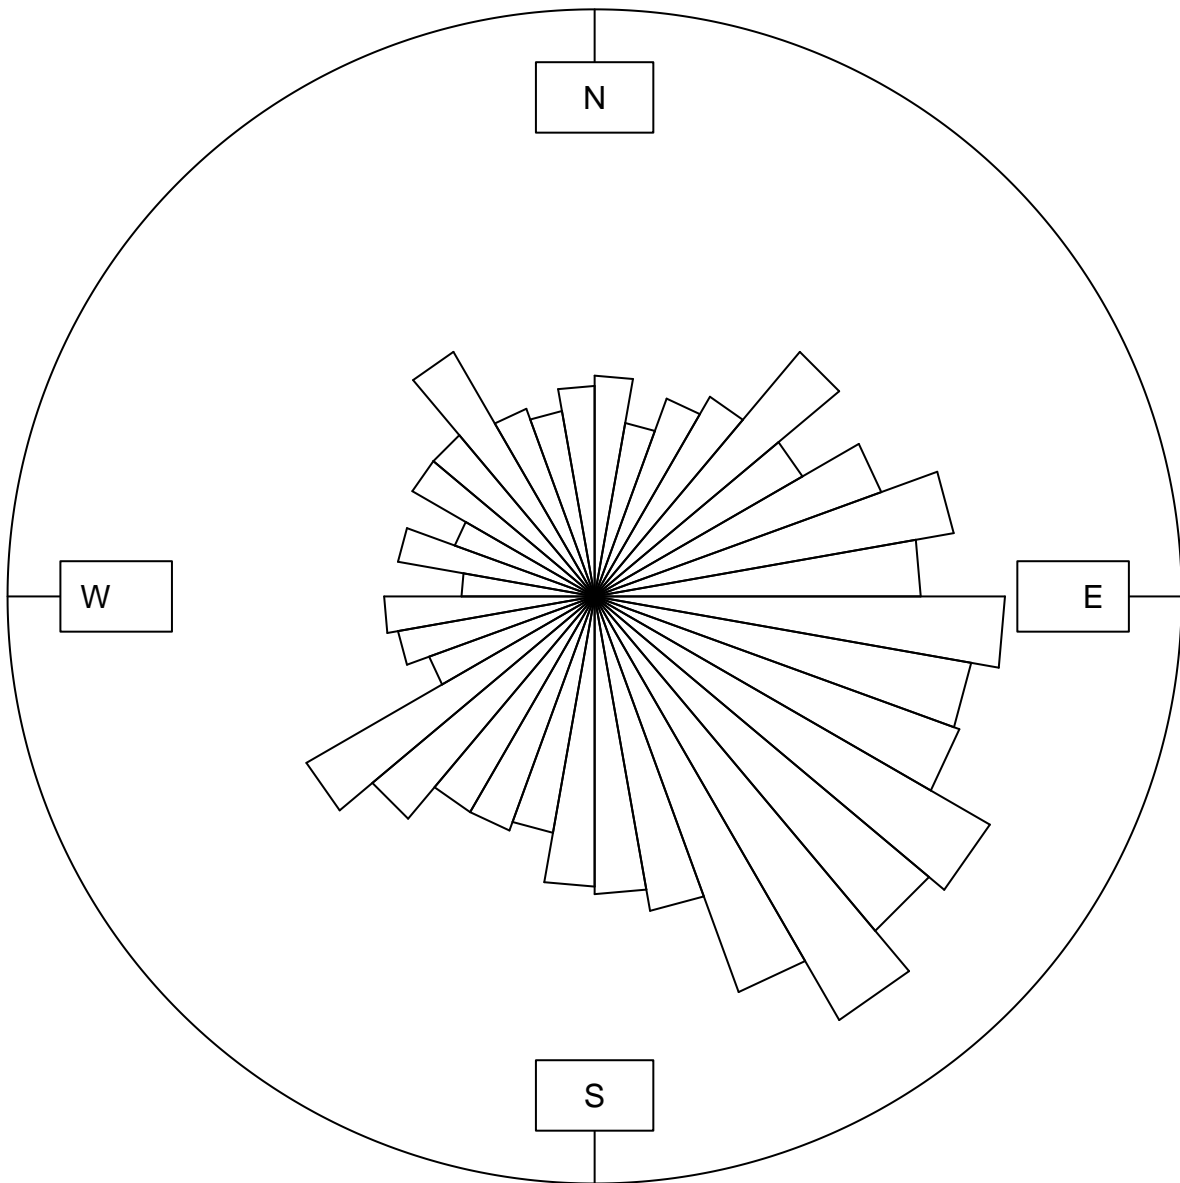

# bootstrap 786

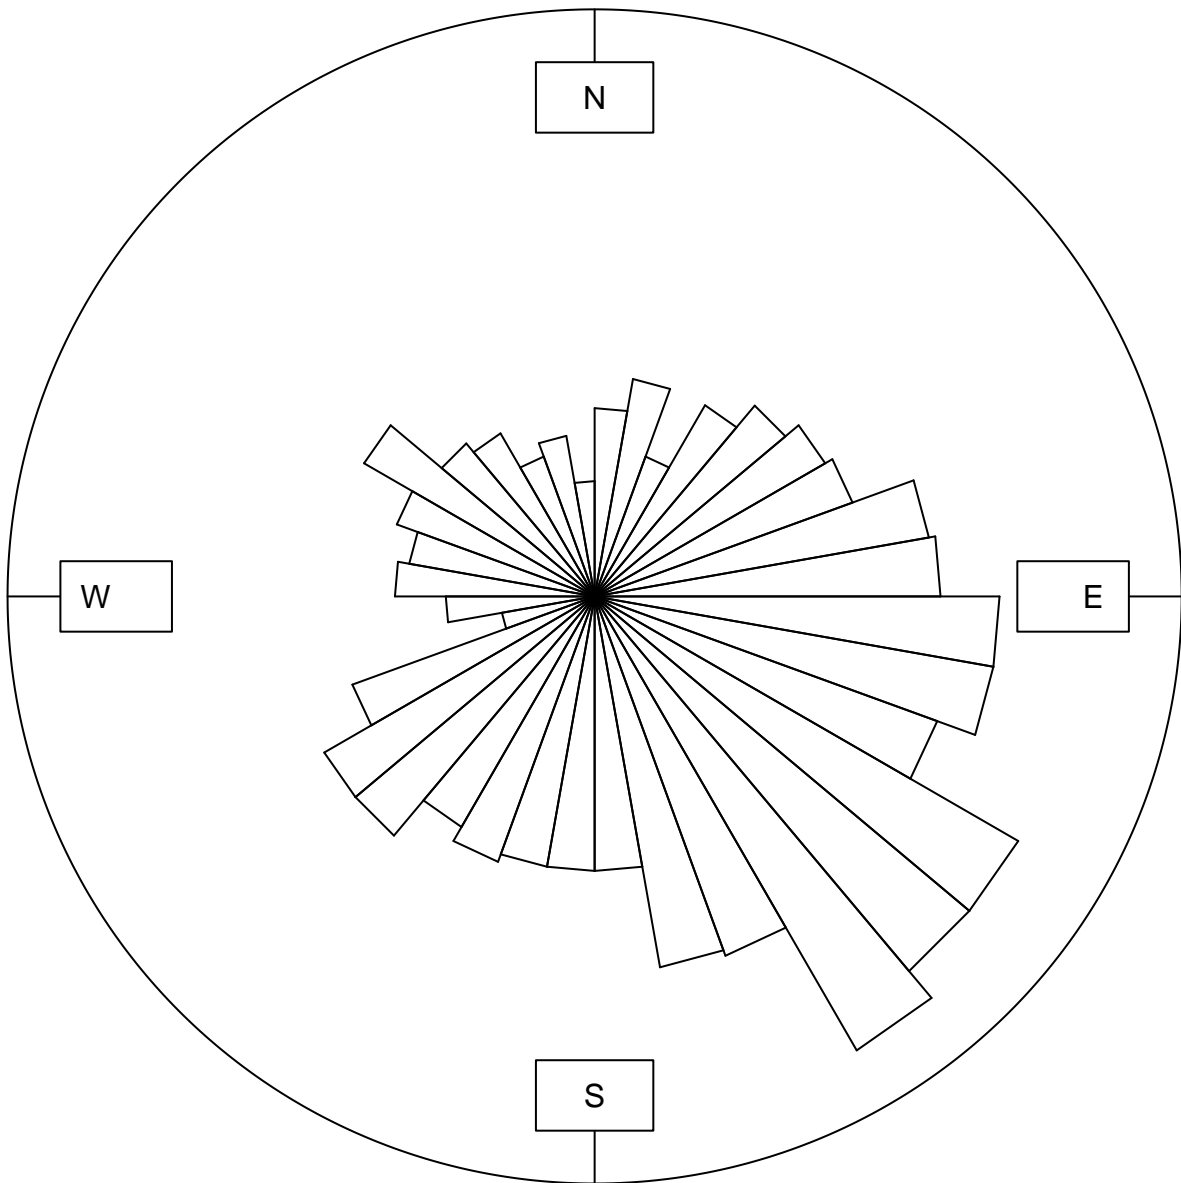

# bootstrap 787

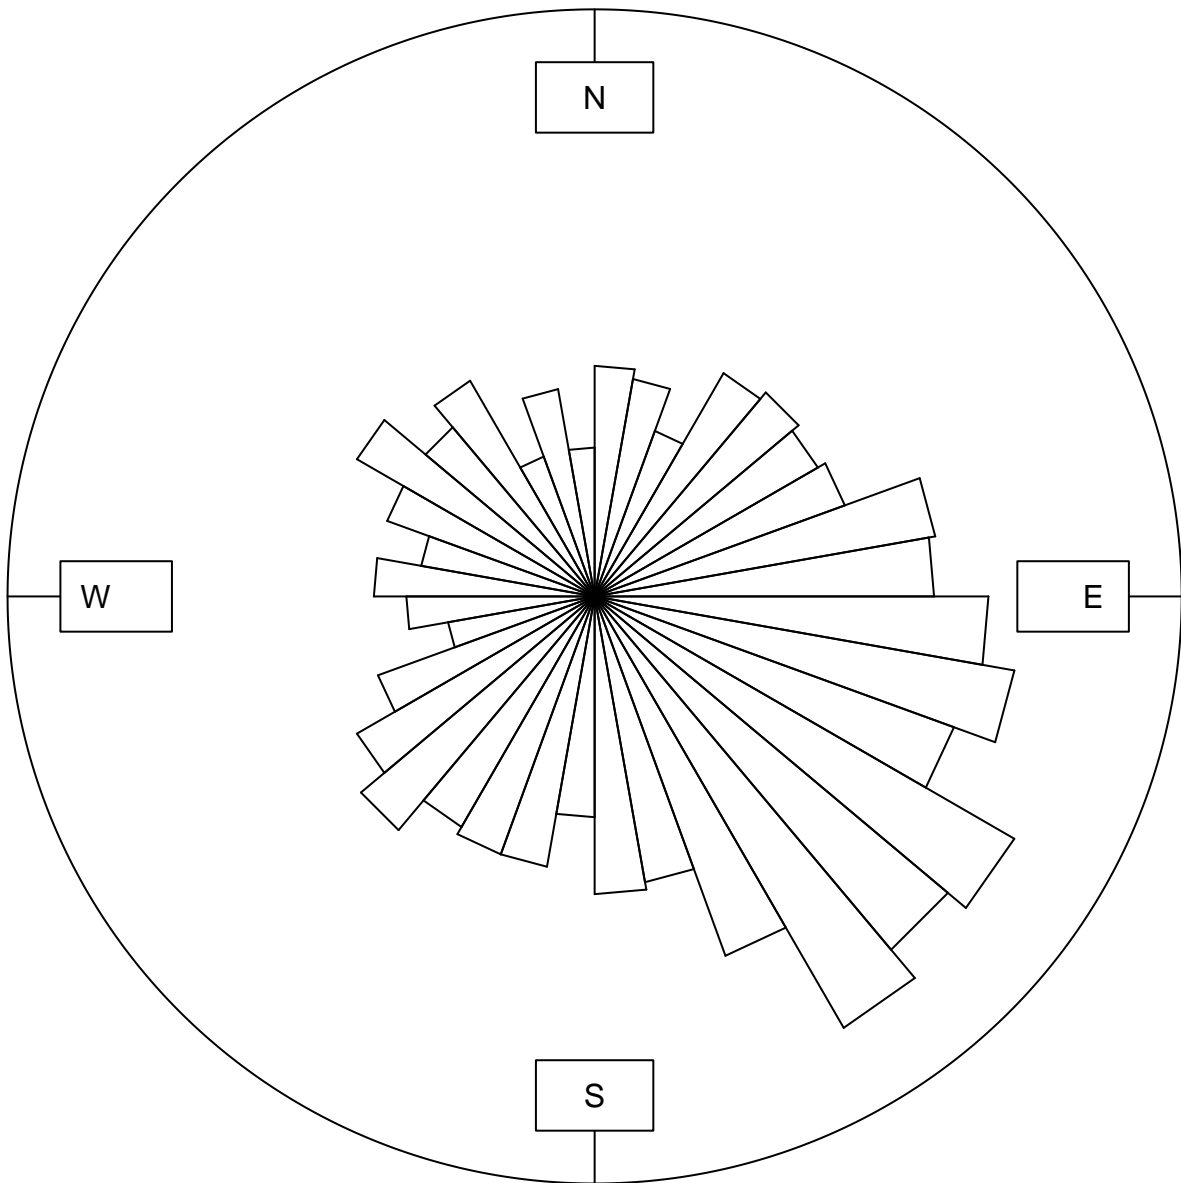

# bootstrap 788

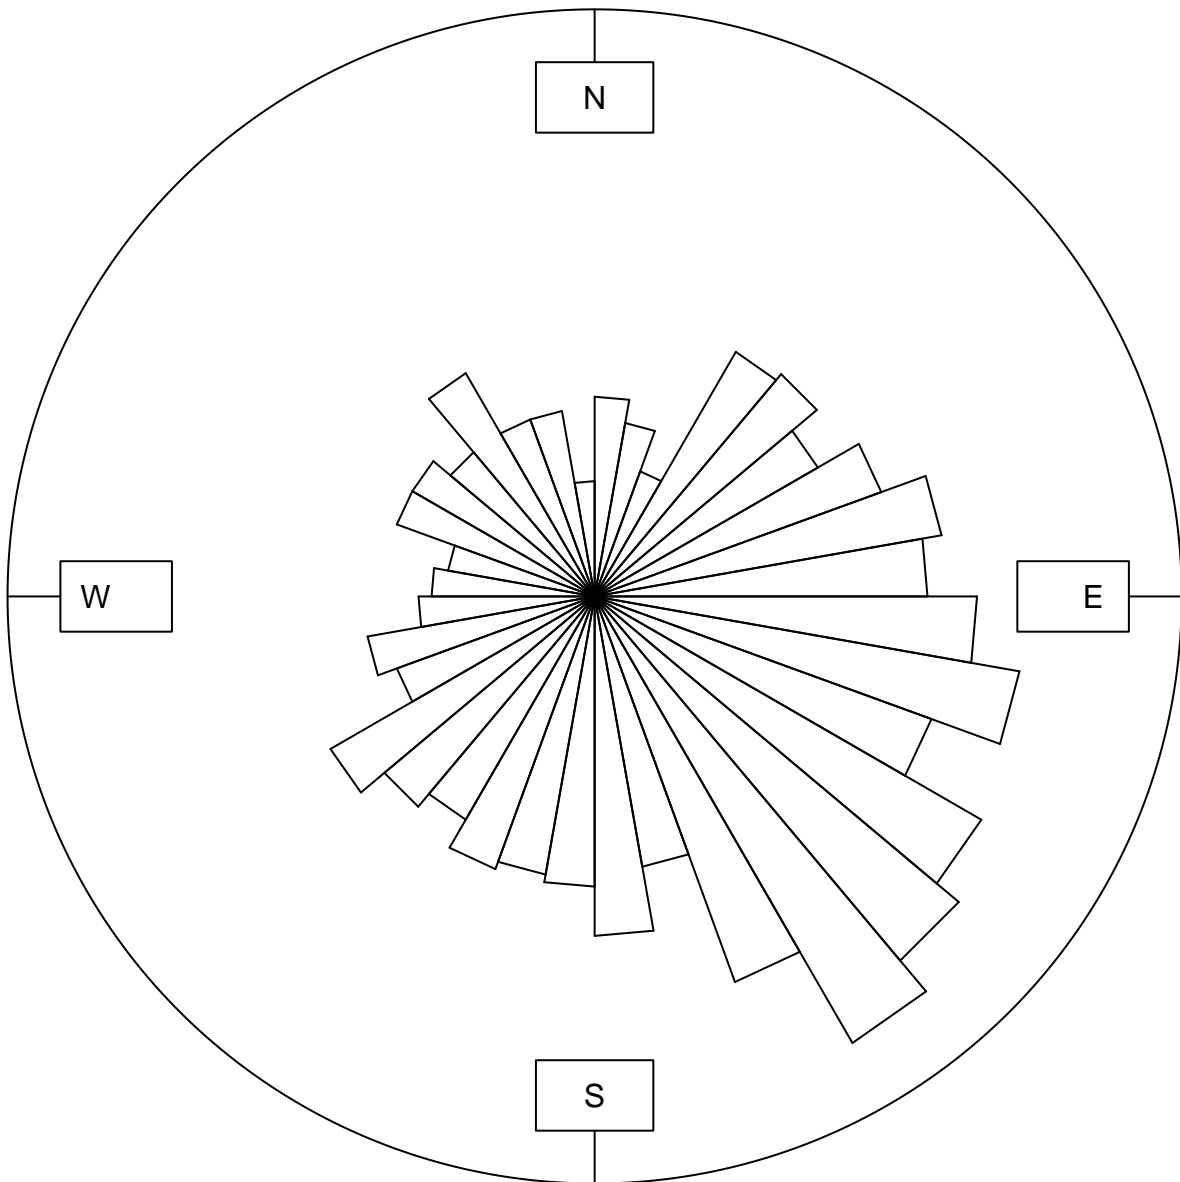

# bootstrap 789

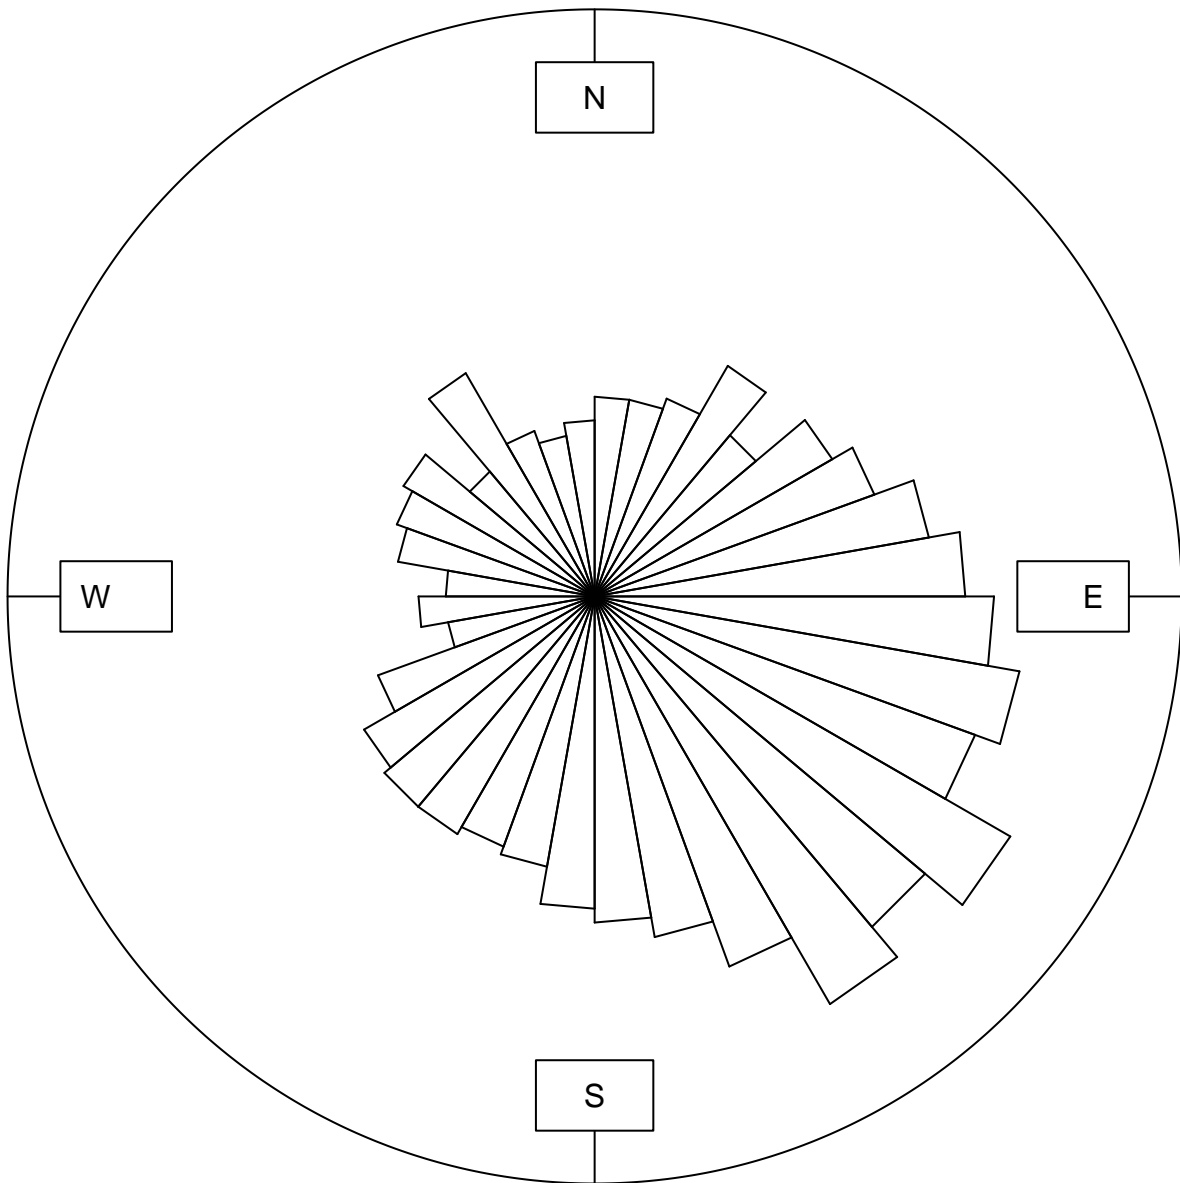

# bootstrap 790

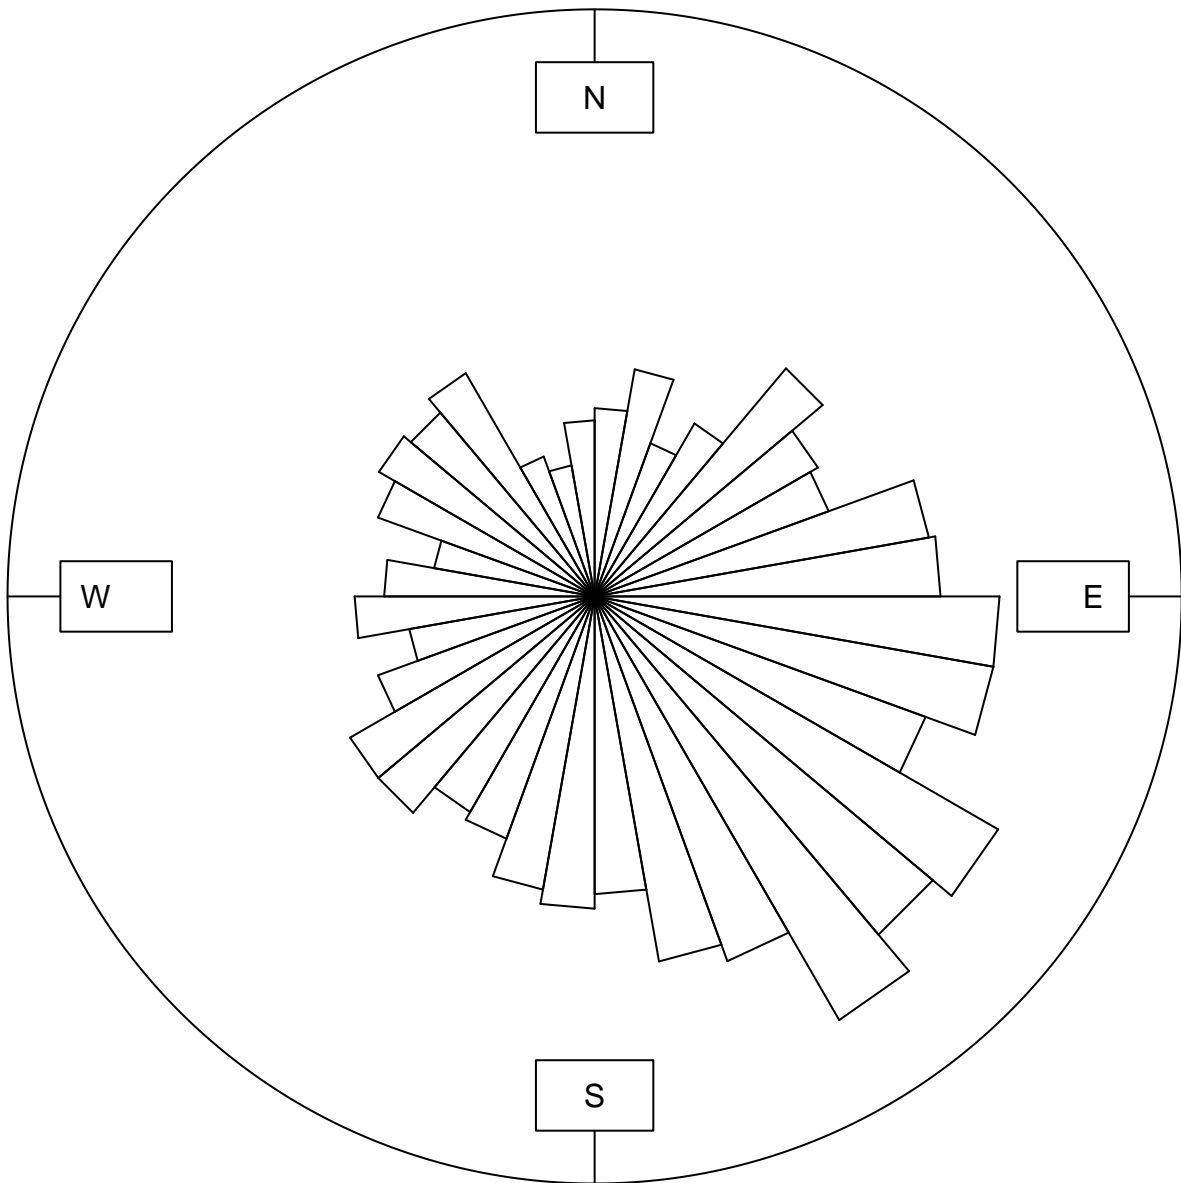

# bootstrap 791

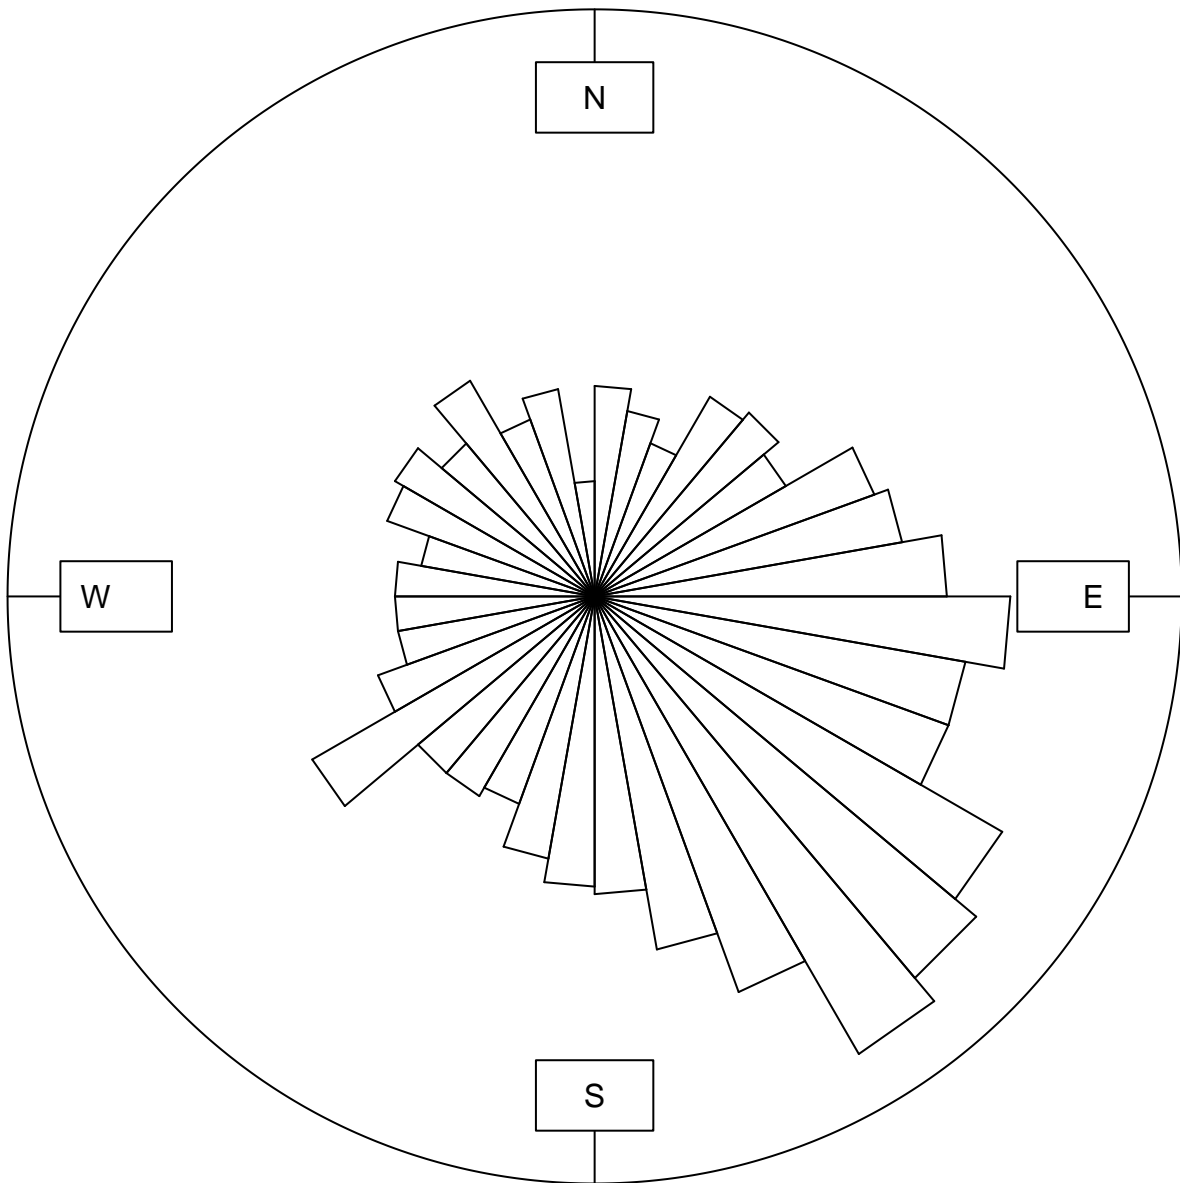

# bootstrap 792

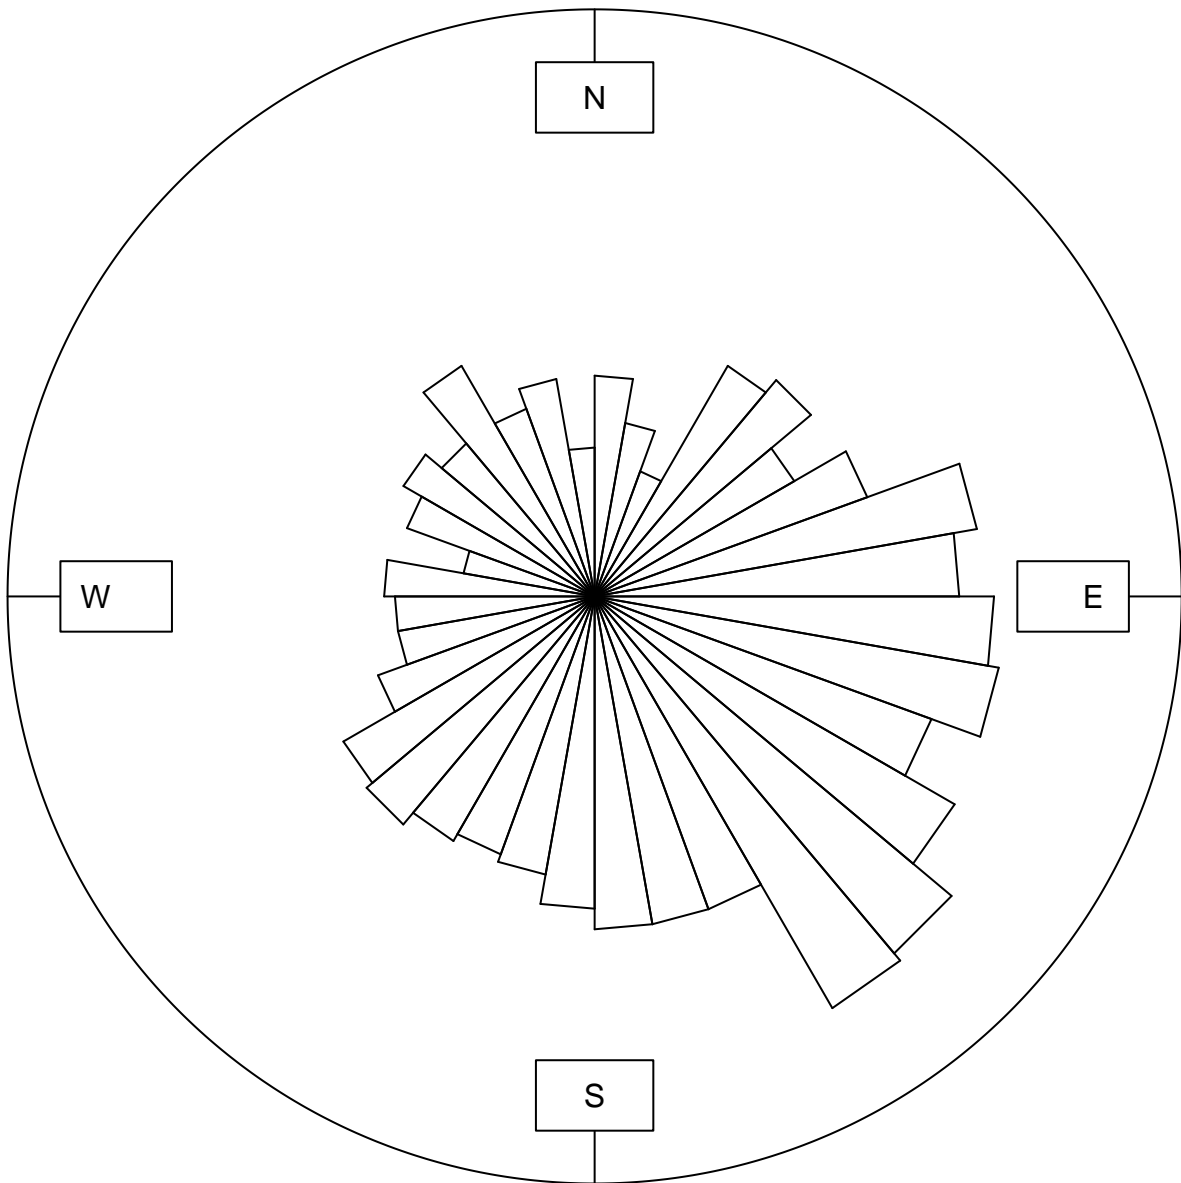



# bootstrap 793

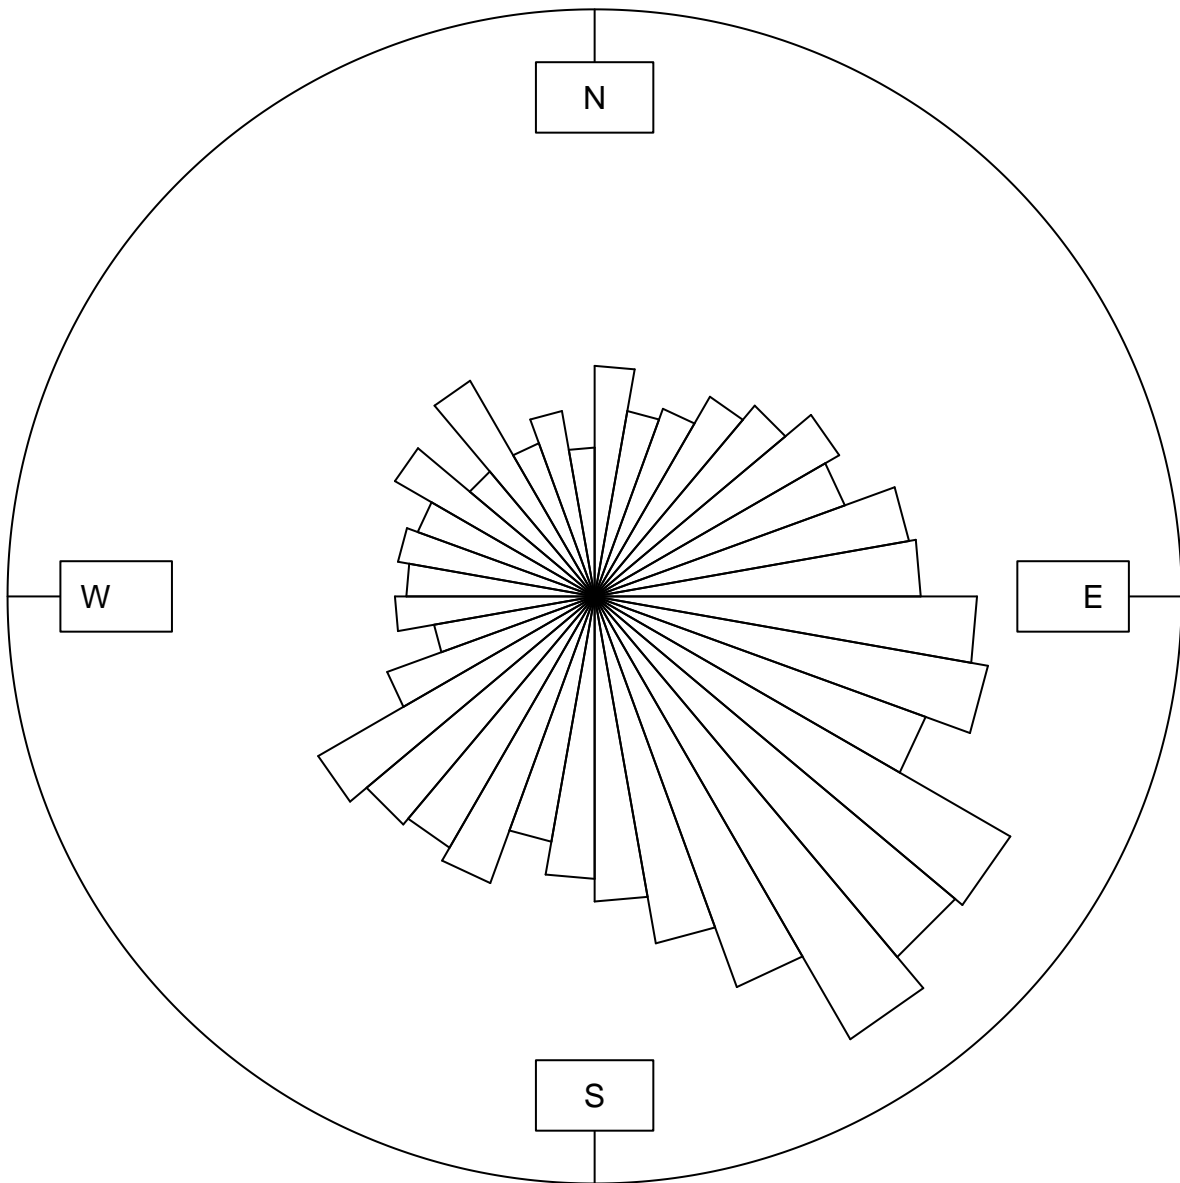

# bootstrap 794

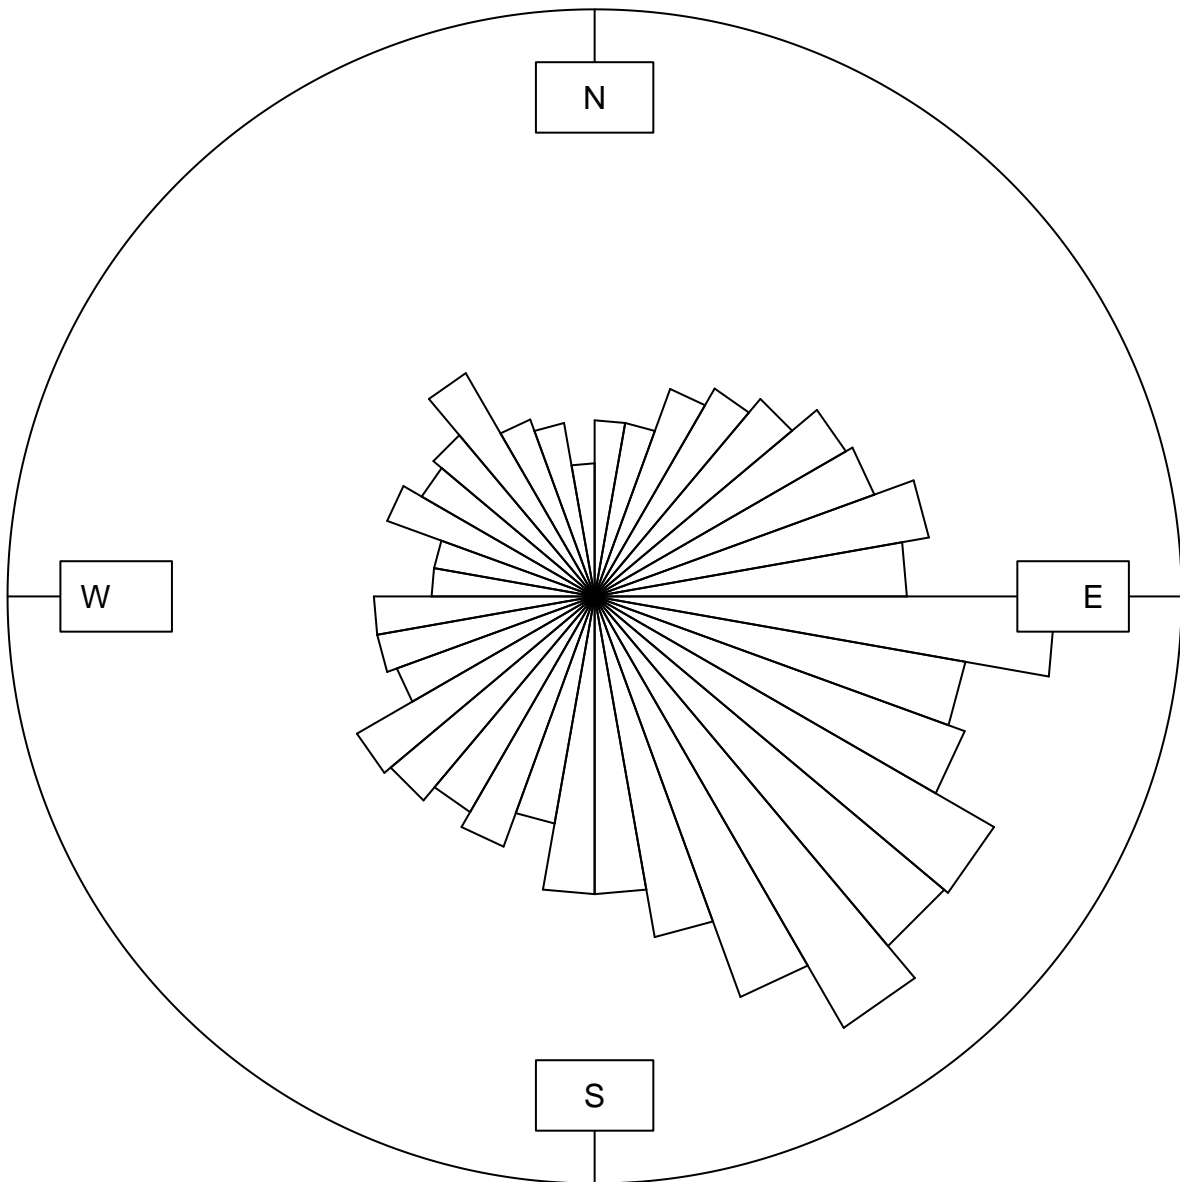

# bootstrap 795

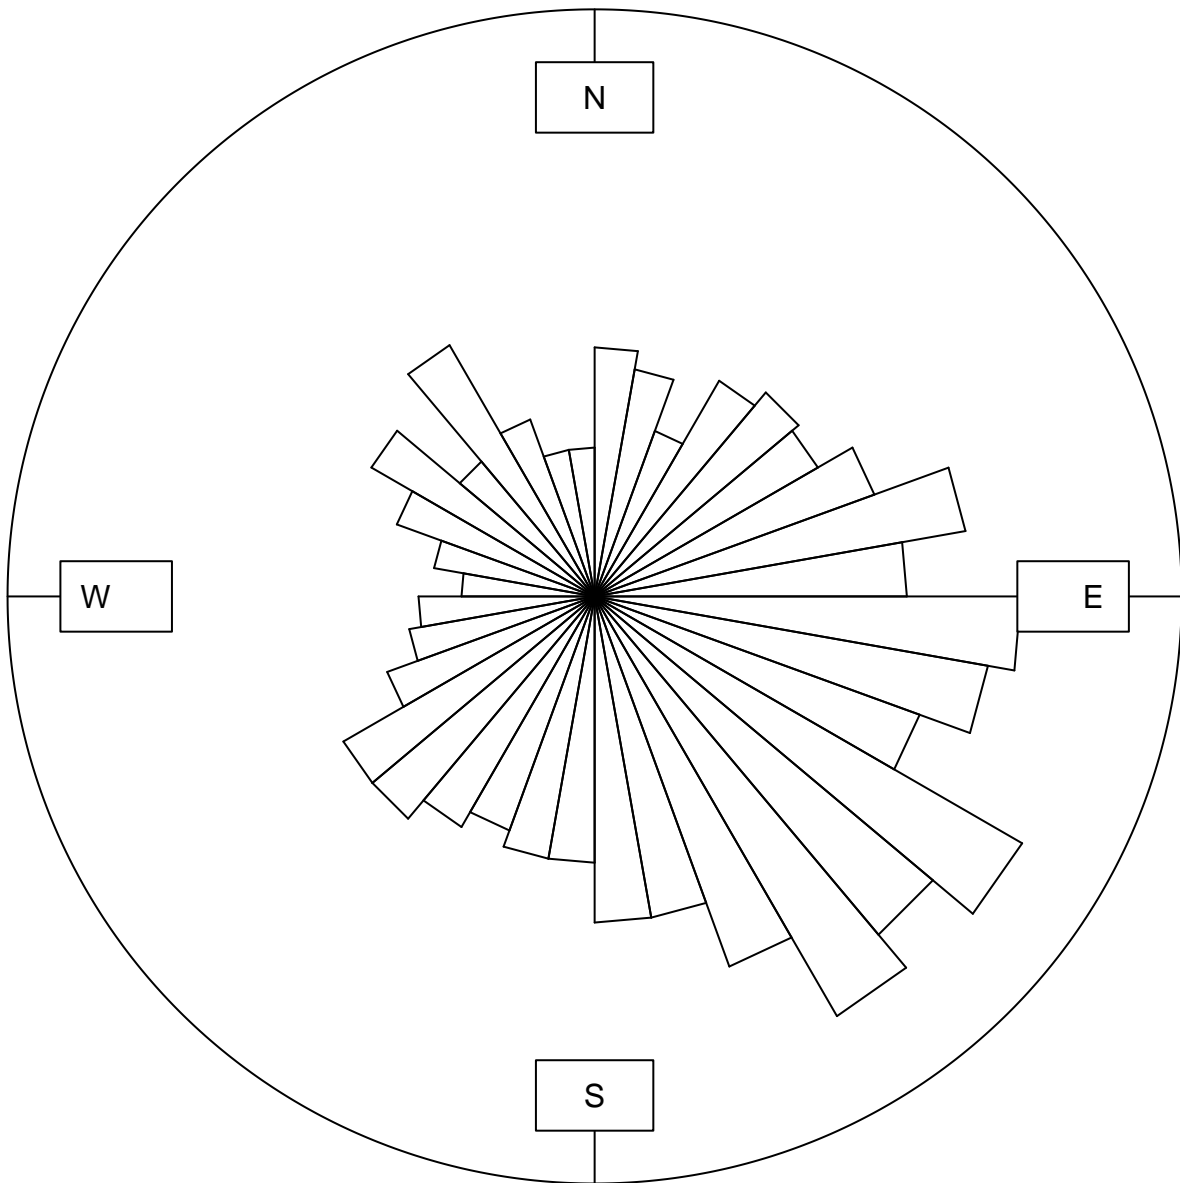

# bootstrap 796

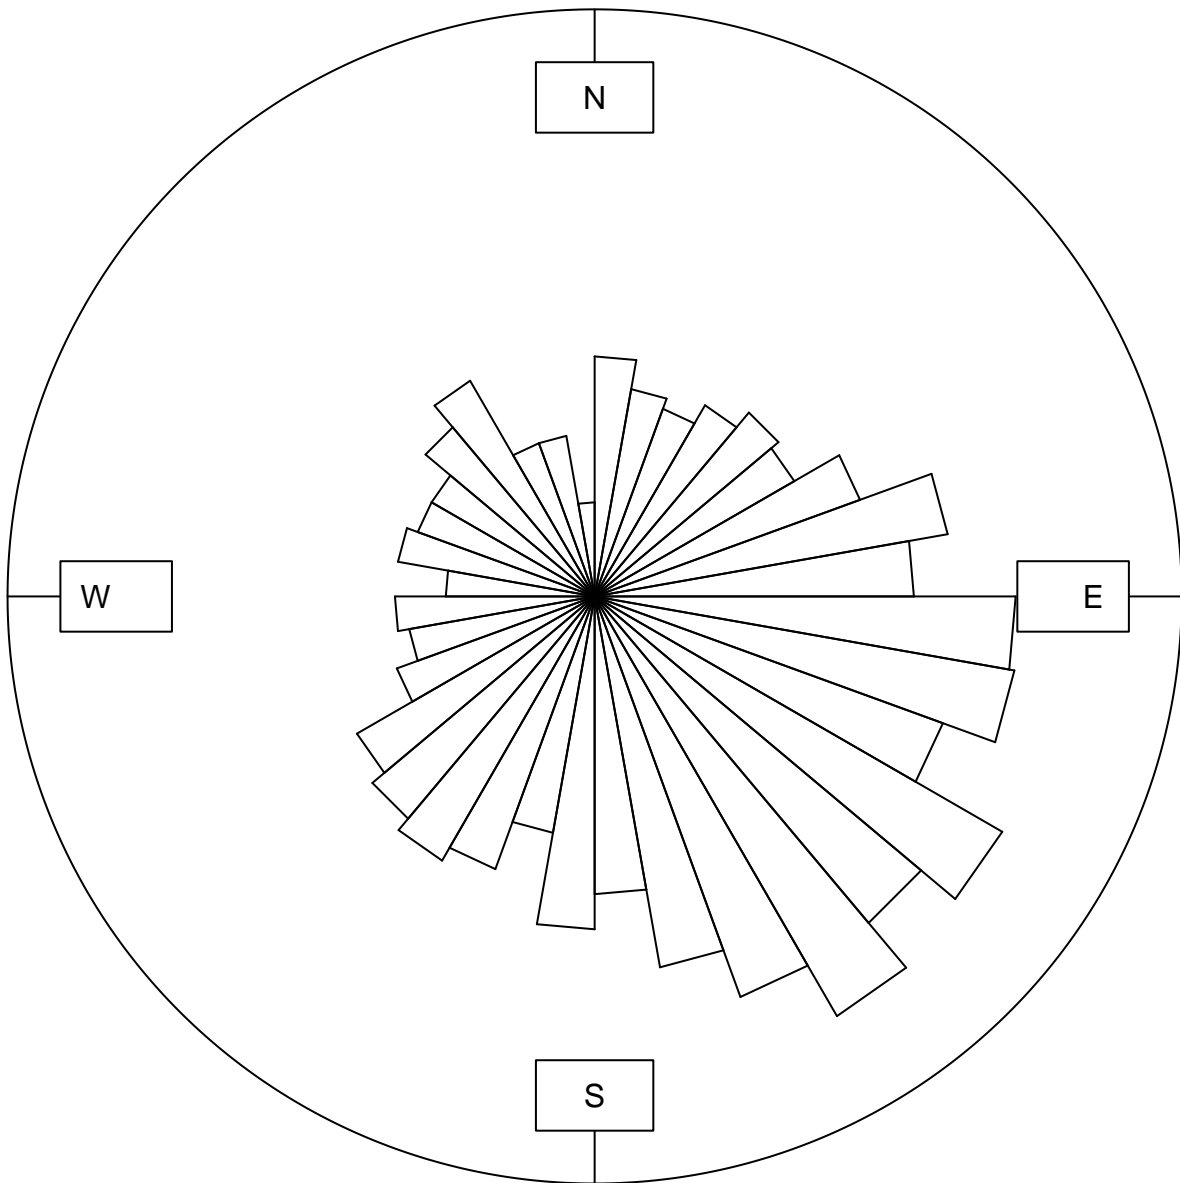

# bootstrap 797

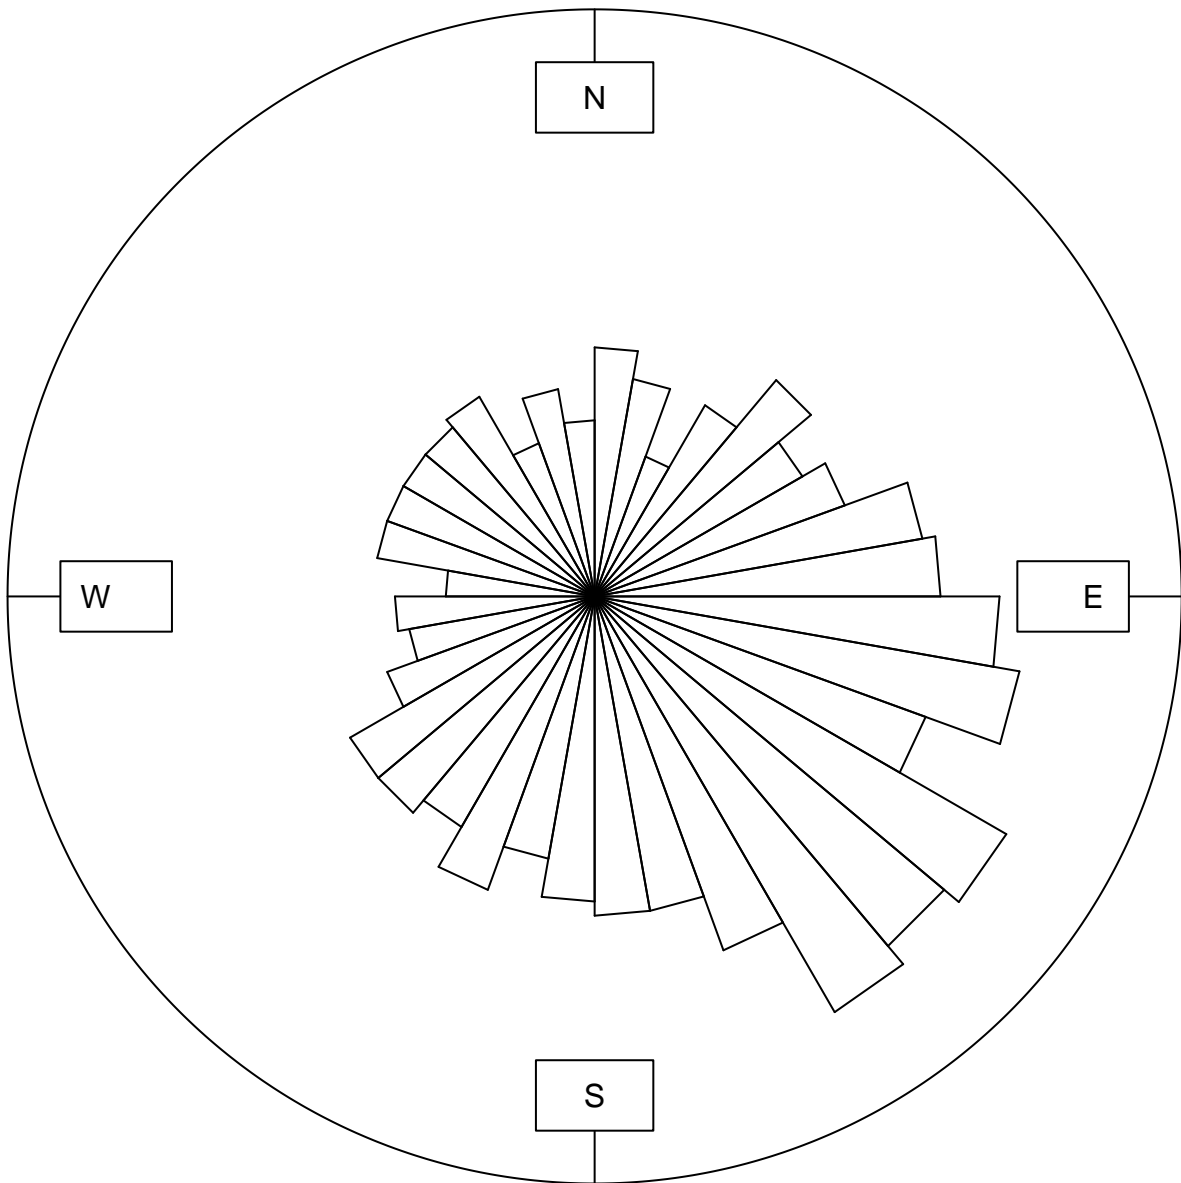

# bootstrap 798

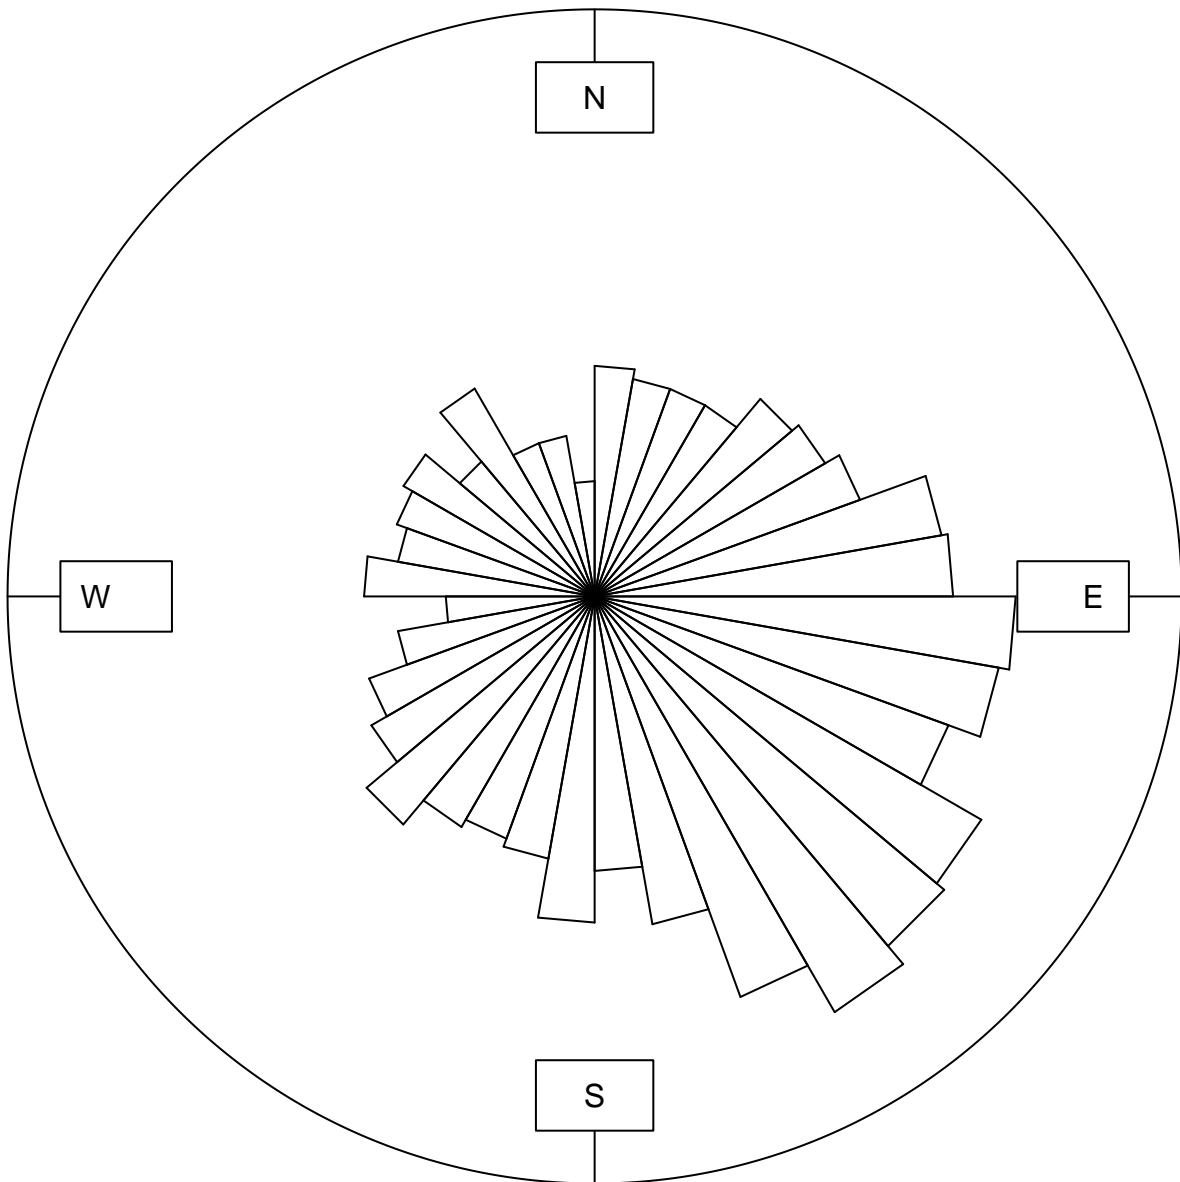

# bootstrap 799

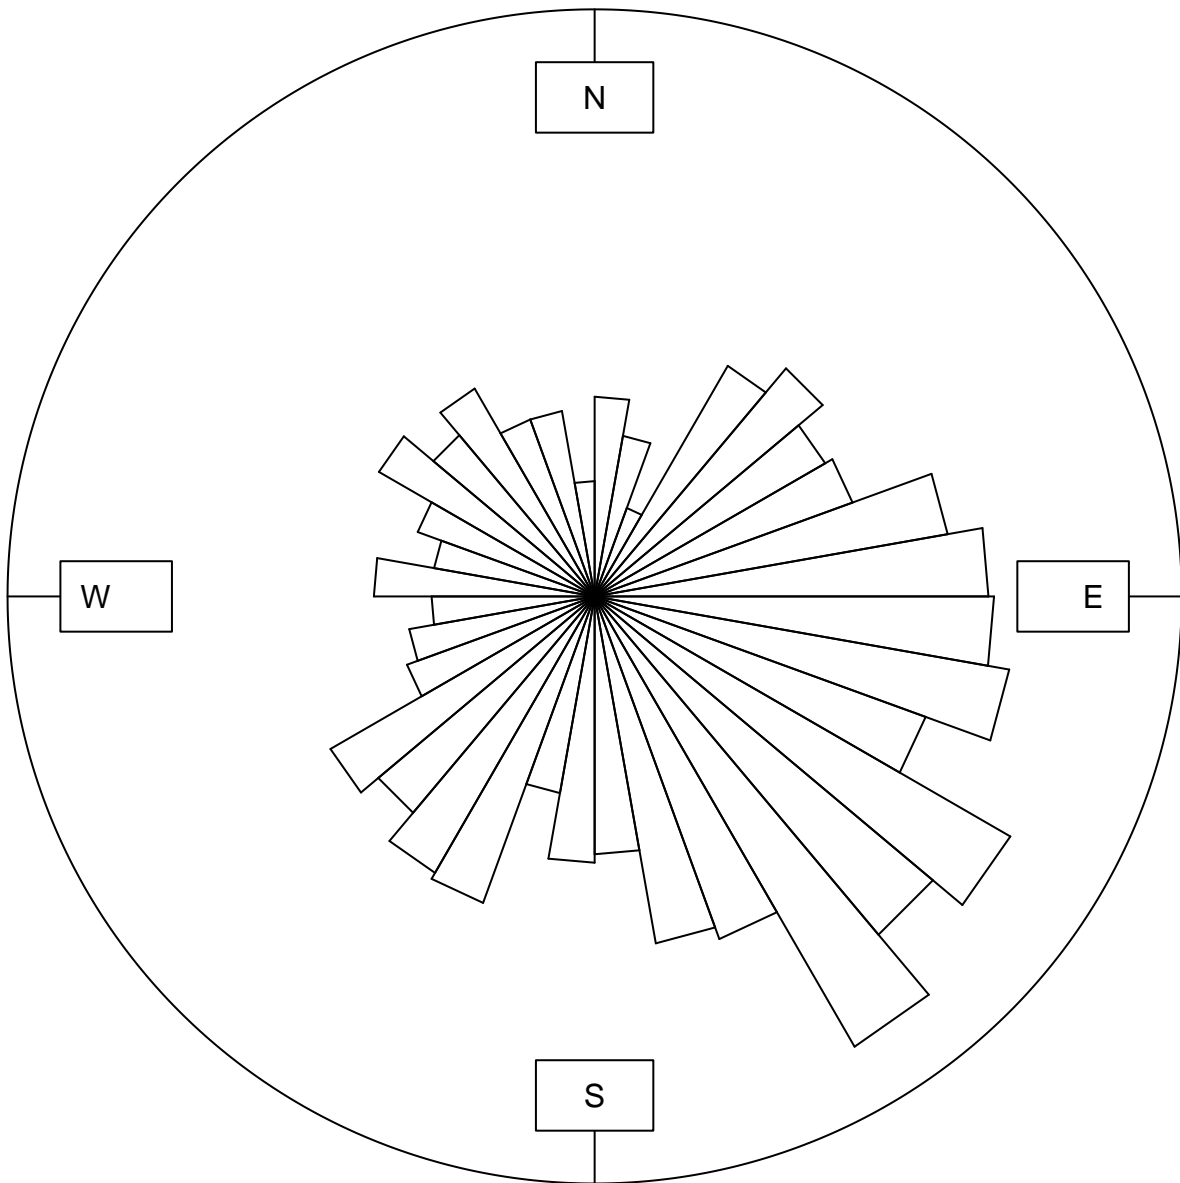

**bootstrap 800**

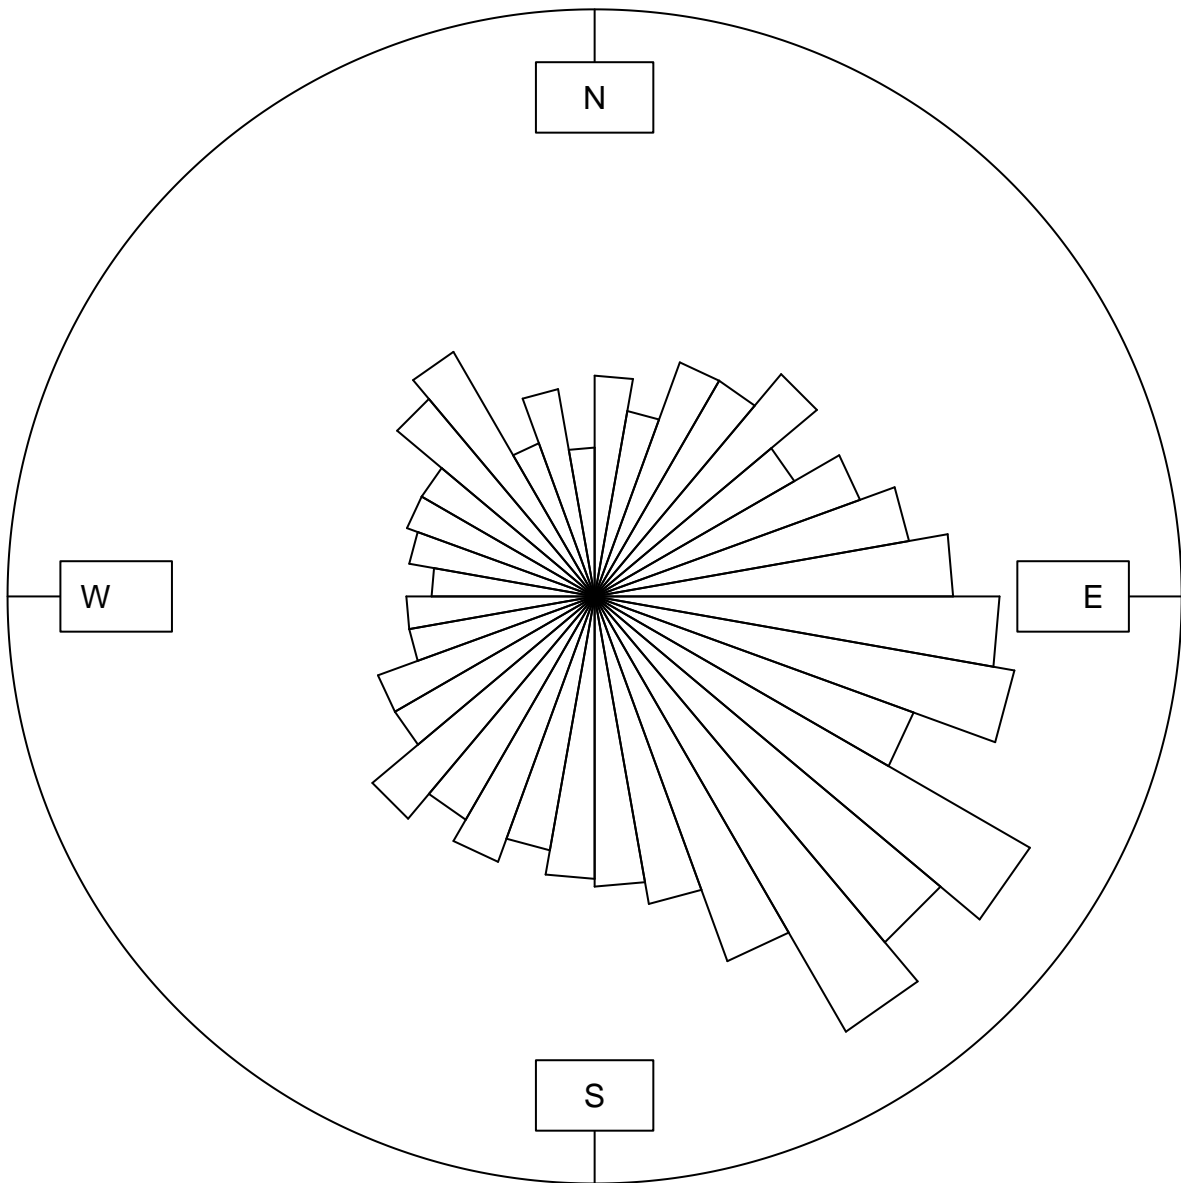



# bootstrap 801

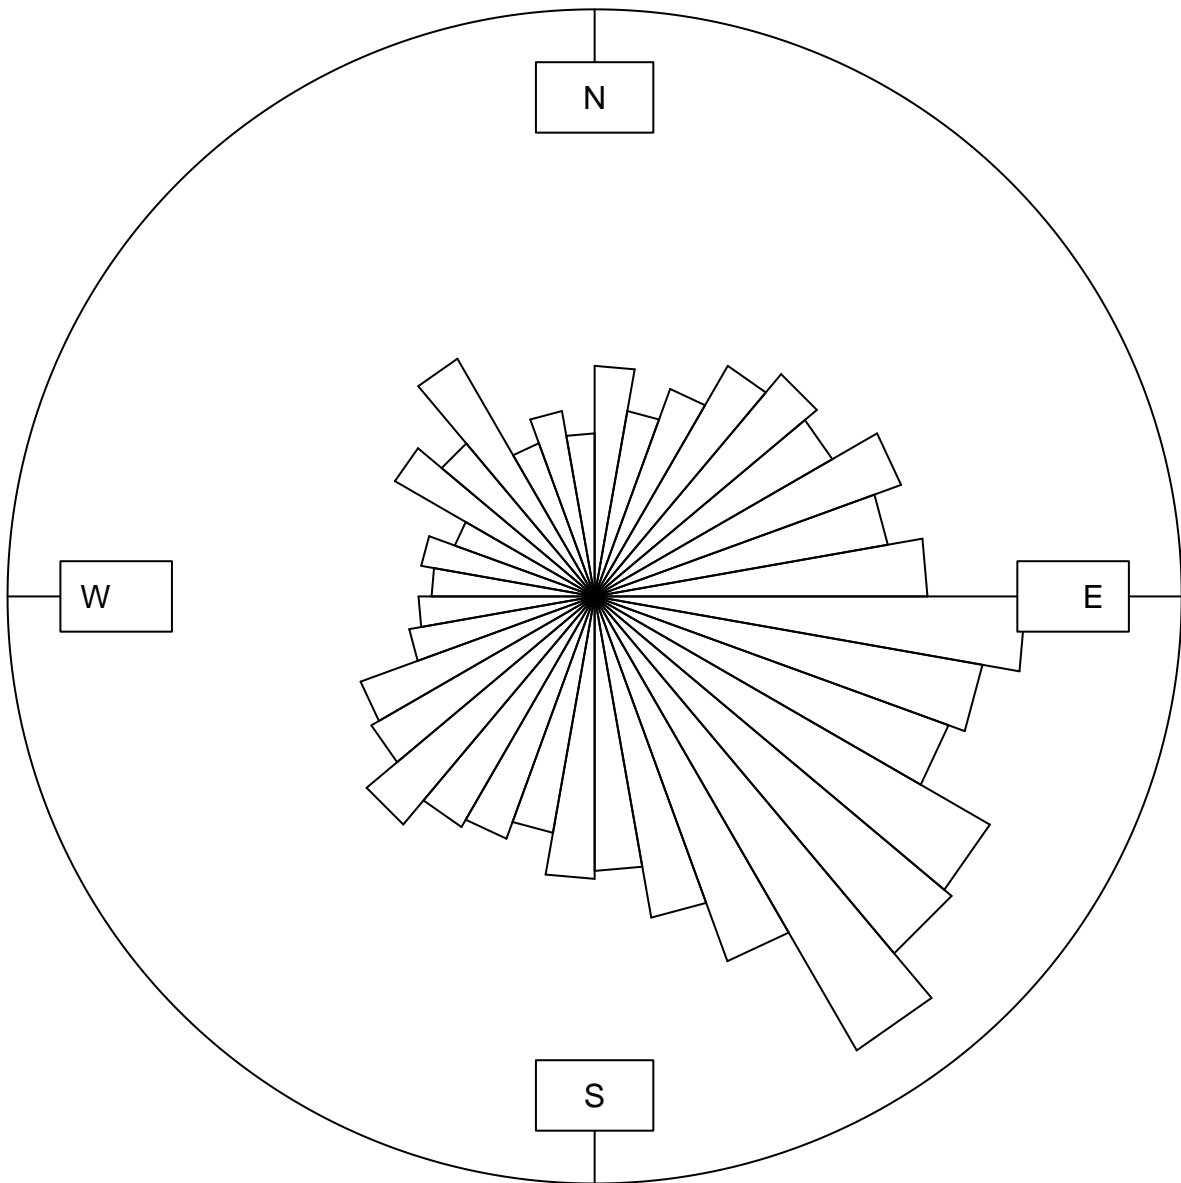

# bootstrap 802

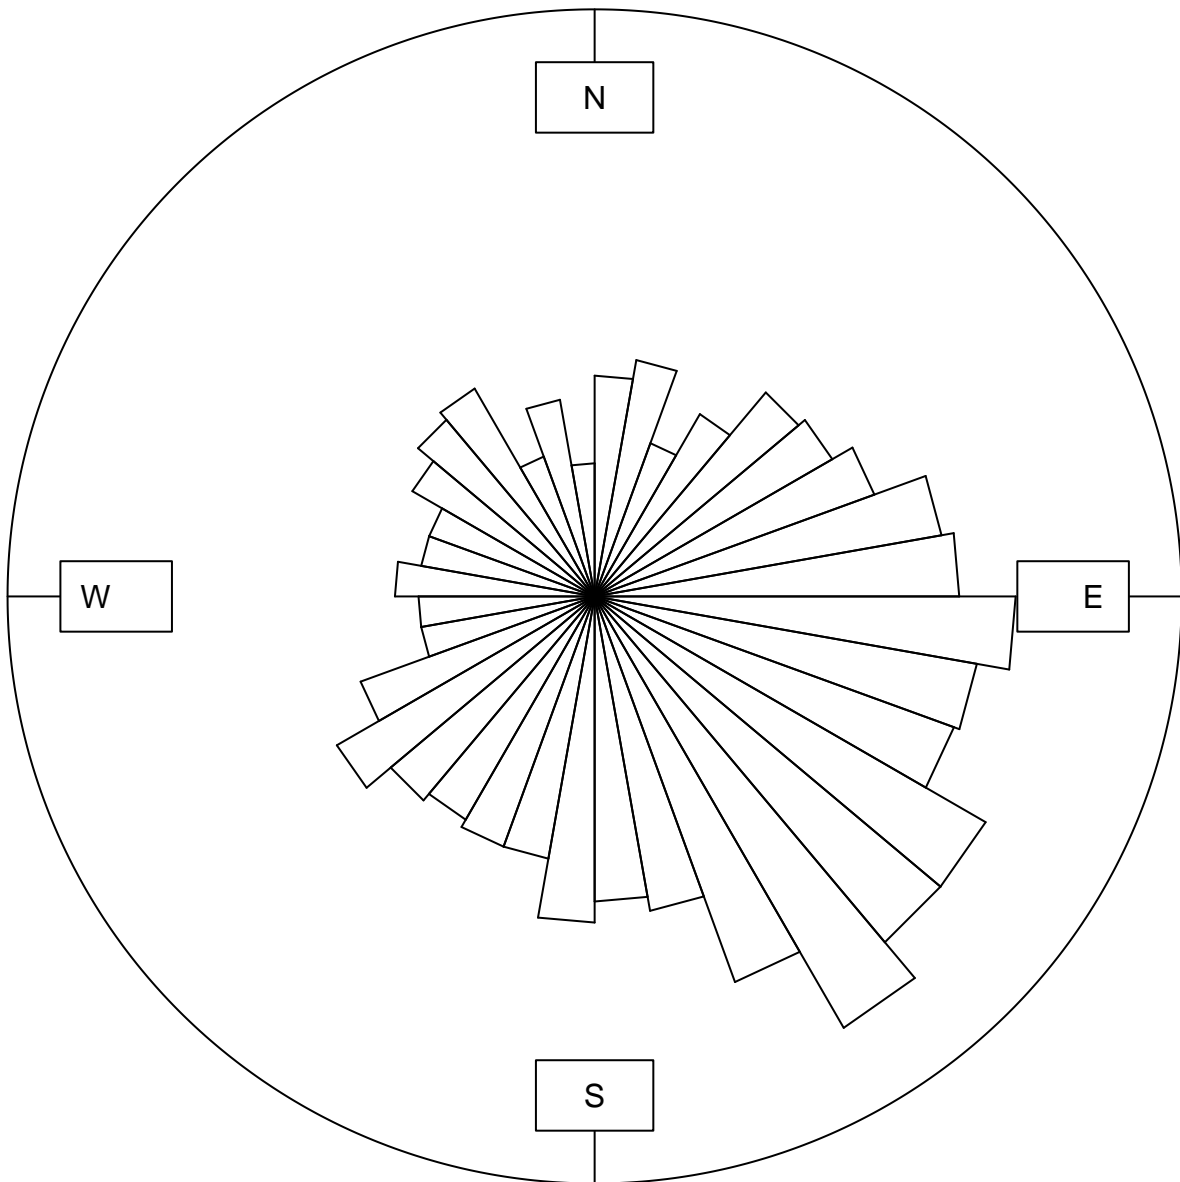

# bootstrap 803

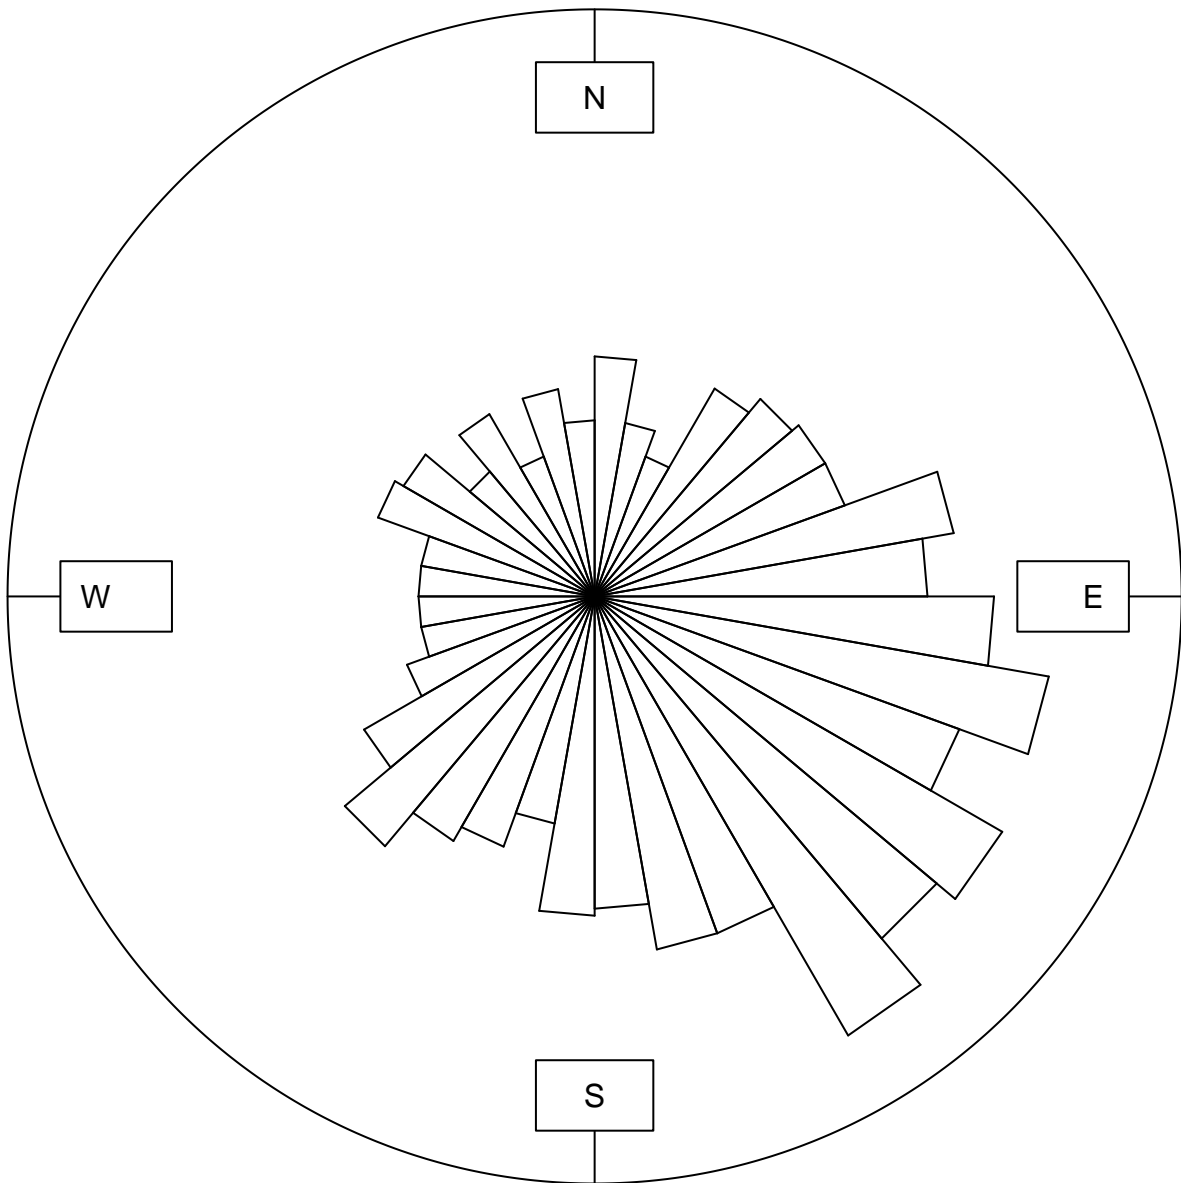

# bootstrap 804

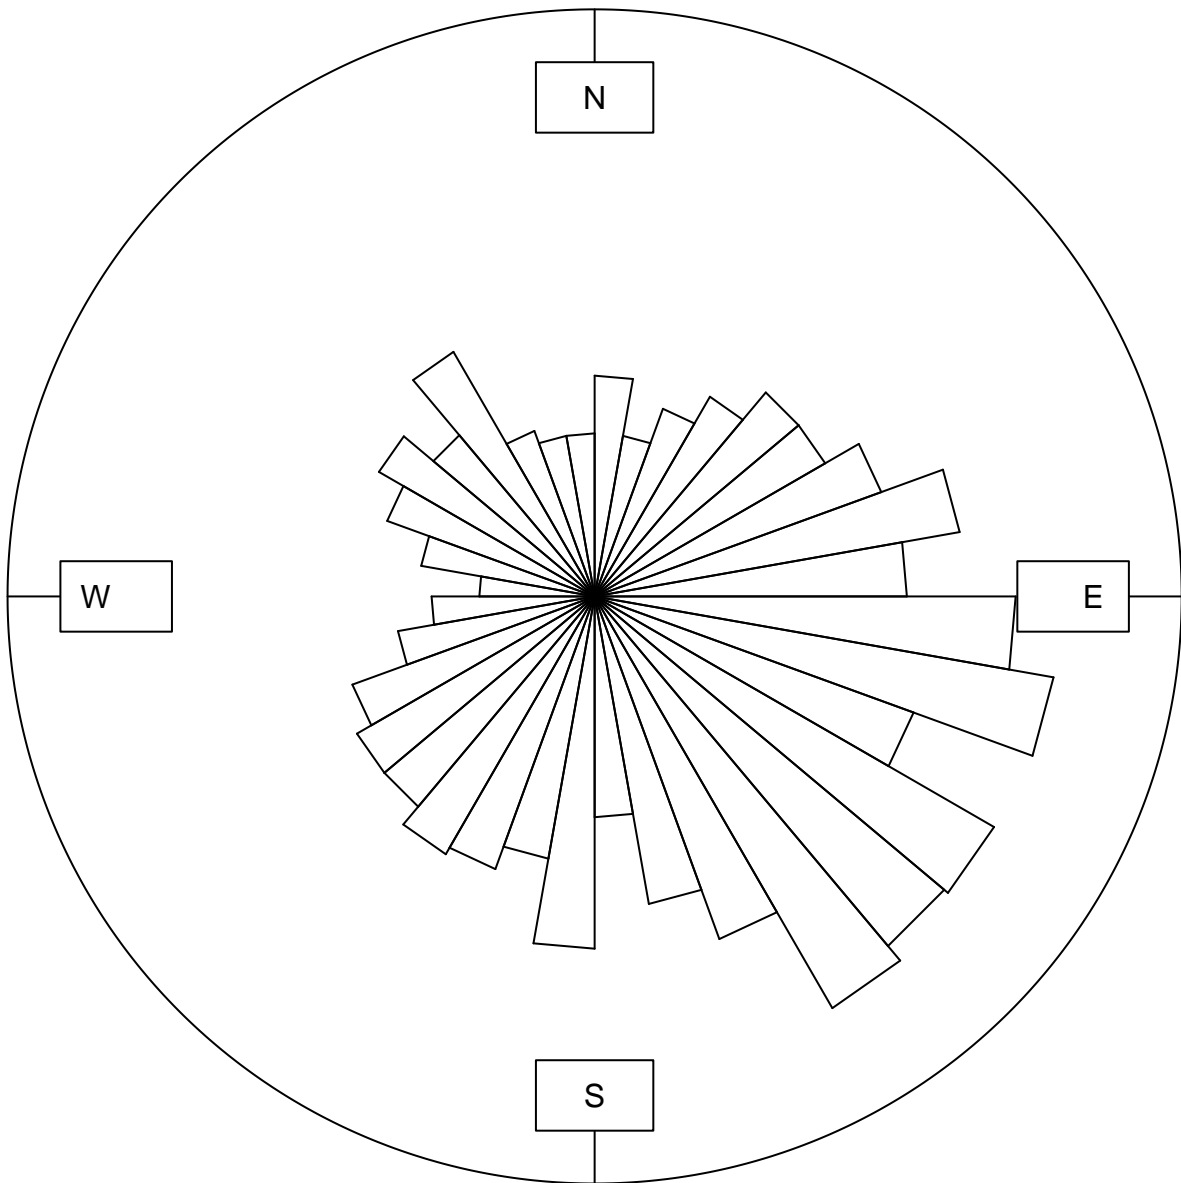

# bootstrap 805

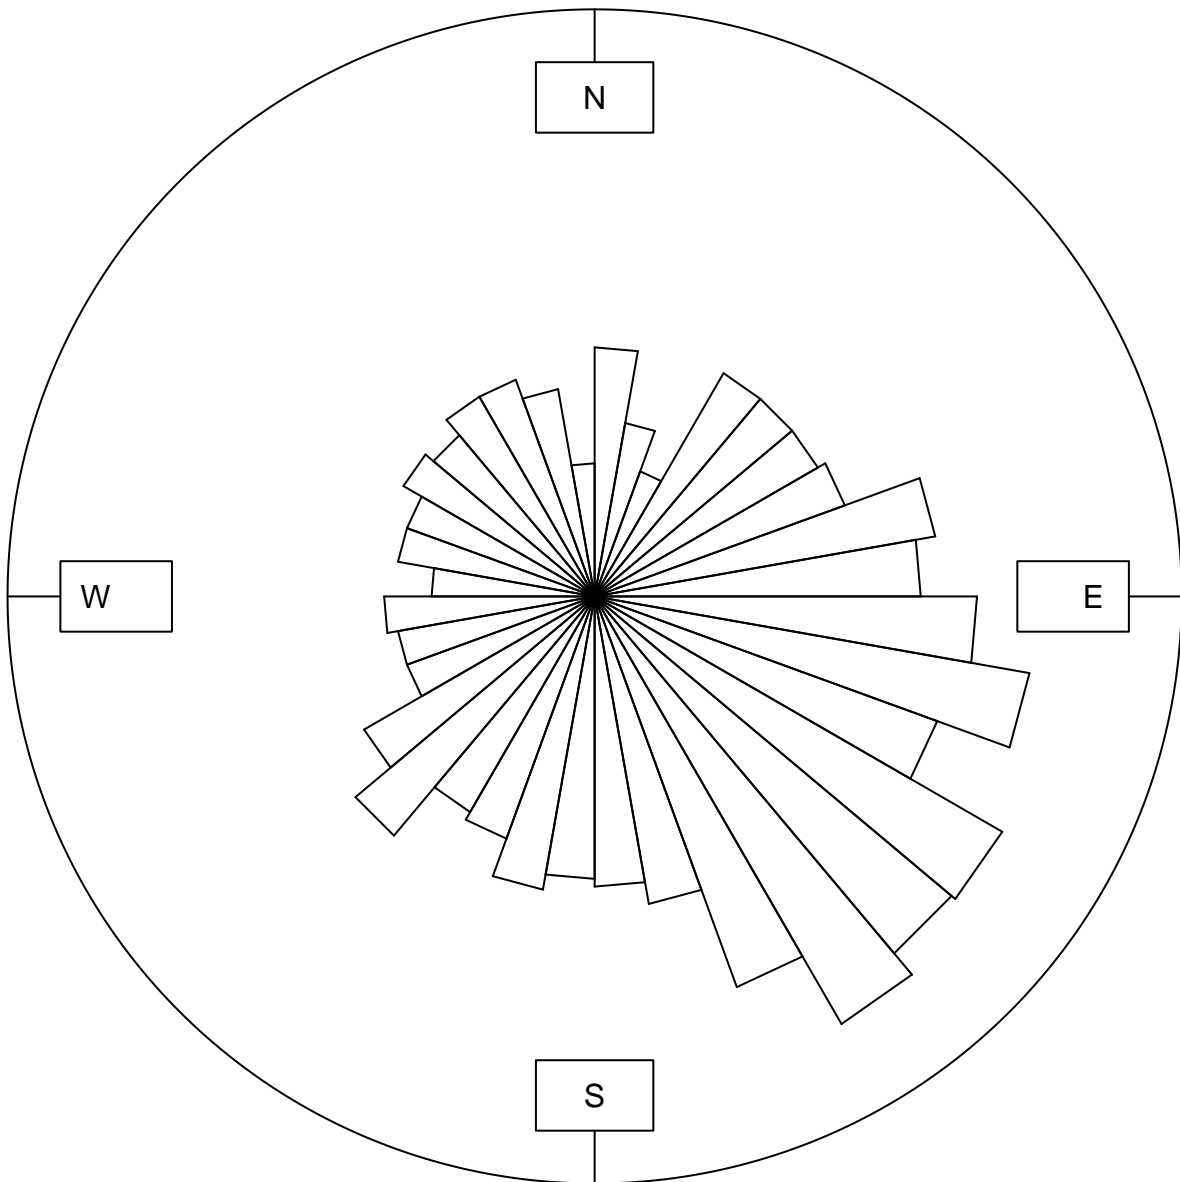

# bootstrap 806

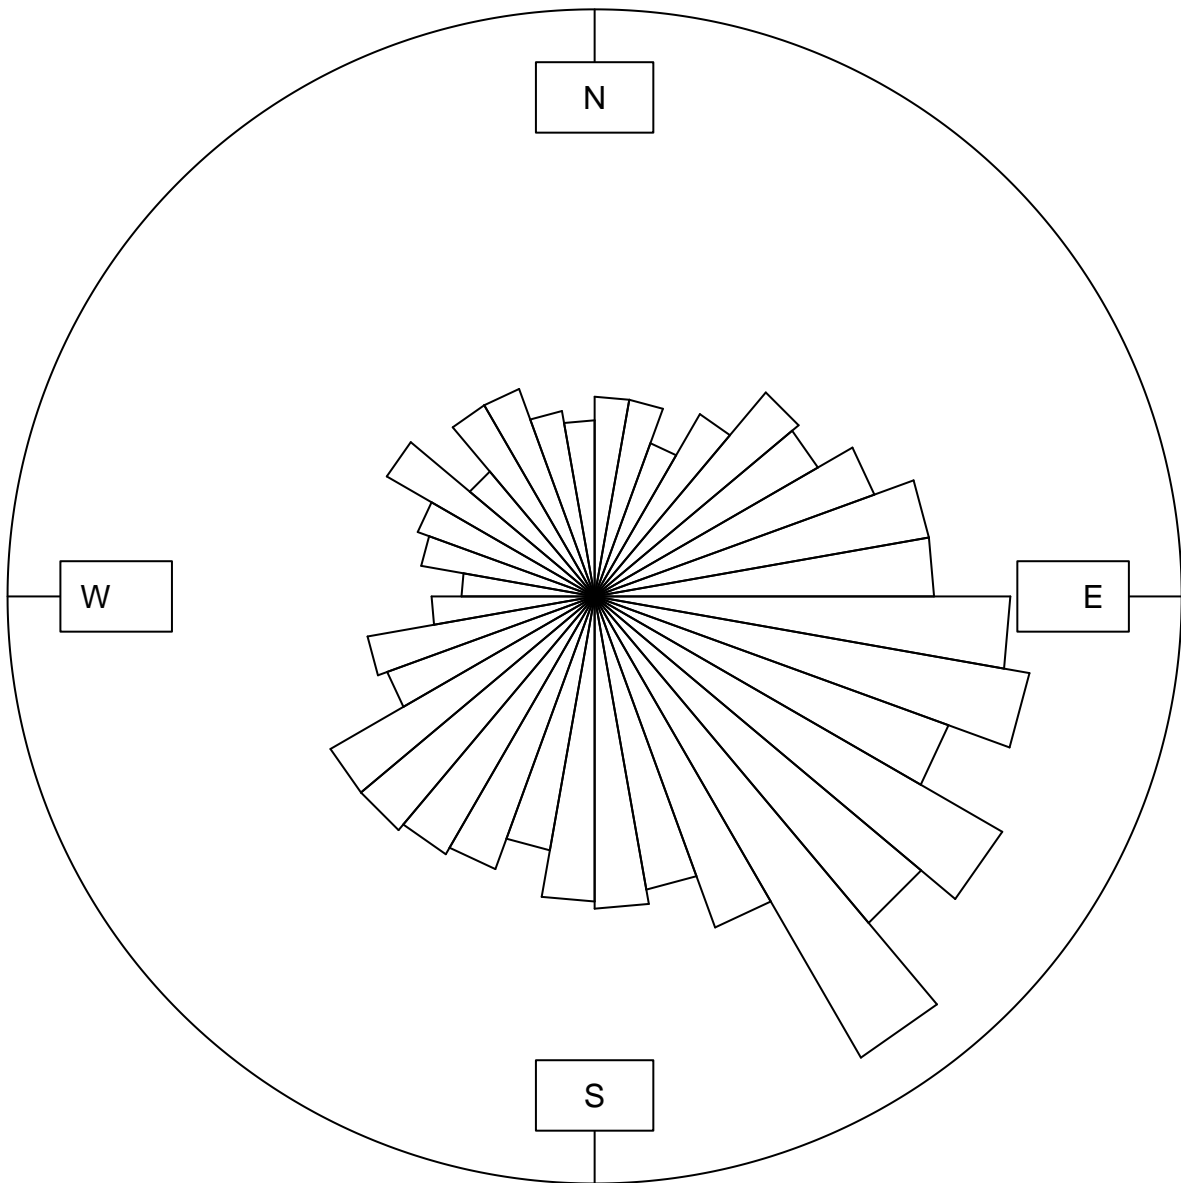

# bootstrap 807

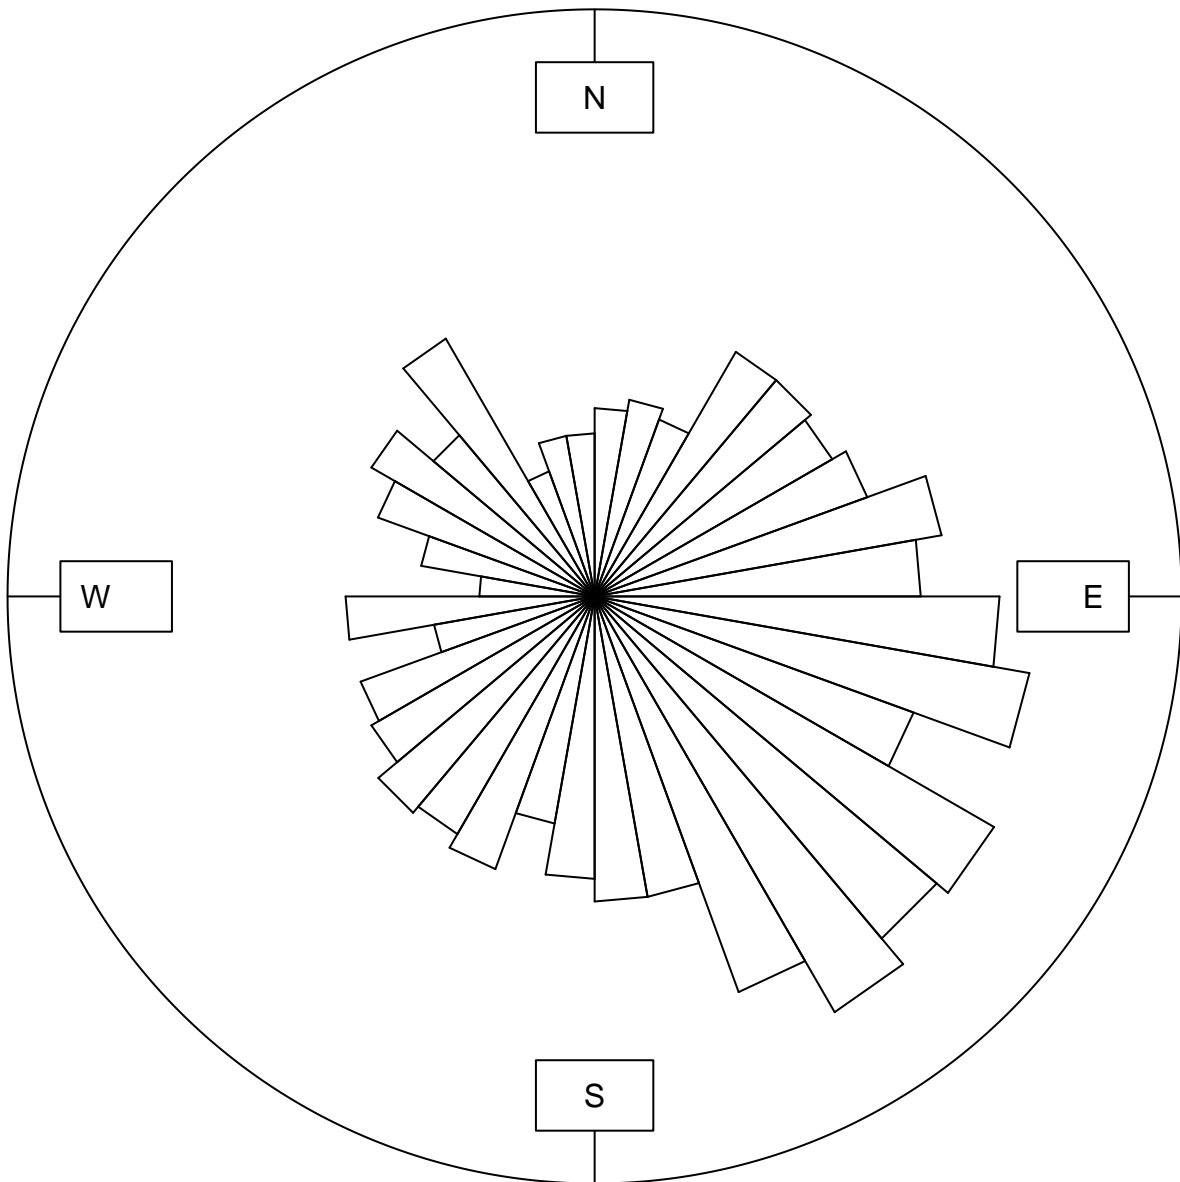

# bootstrap 808

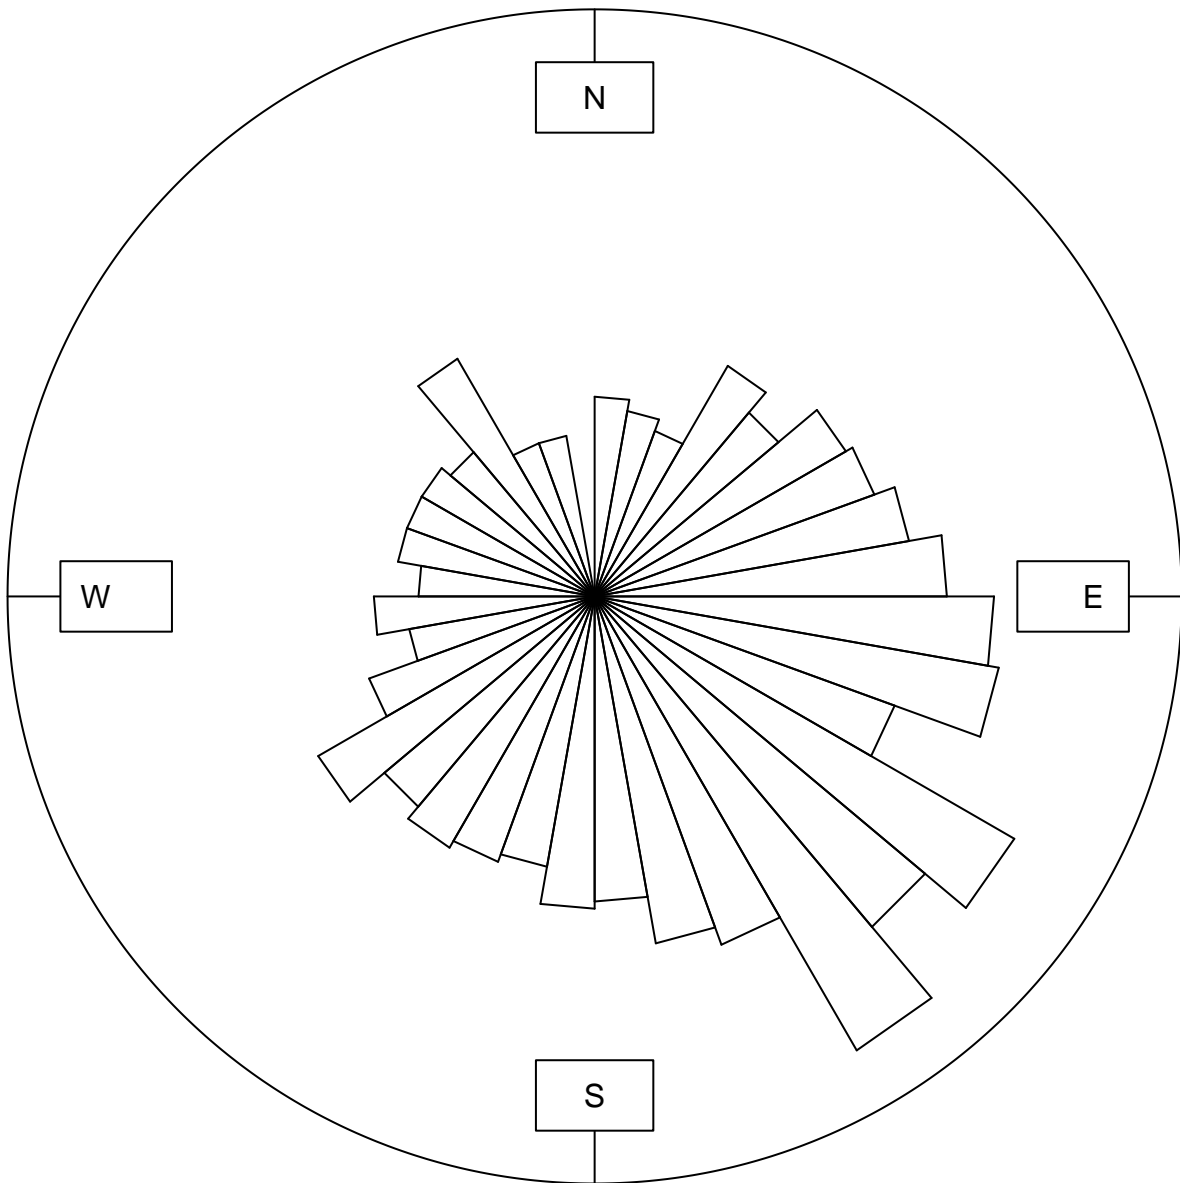



# bootstrap 809

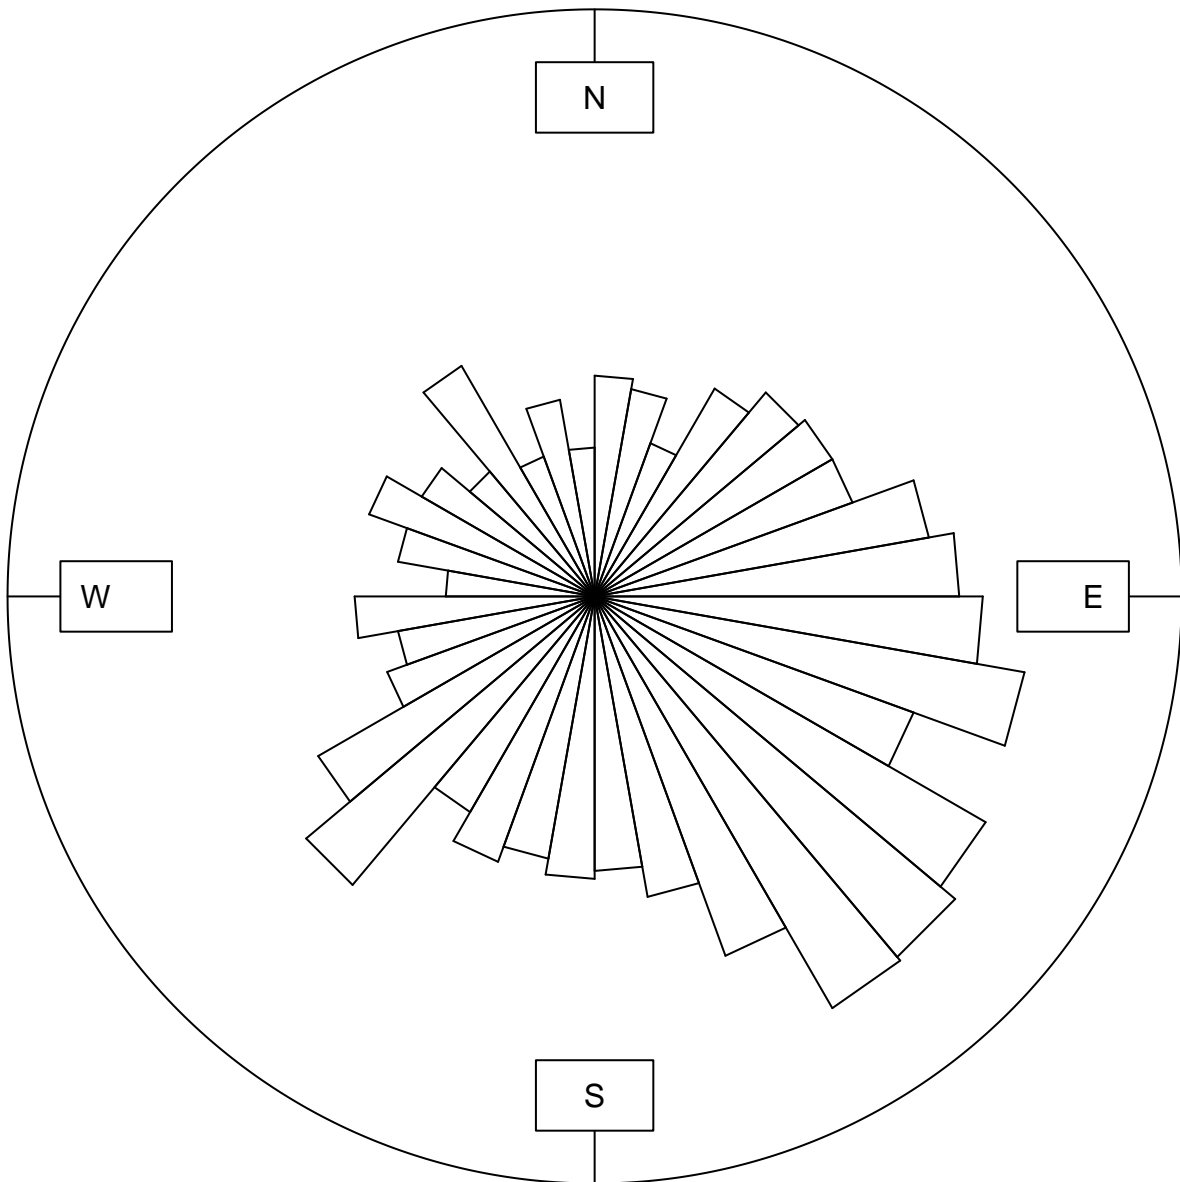

# bootstrap 810

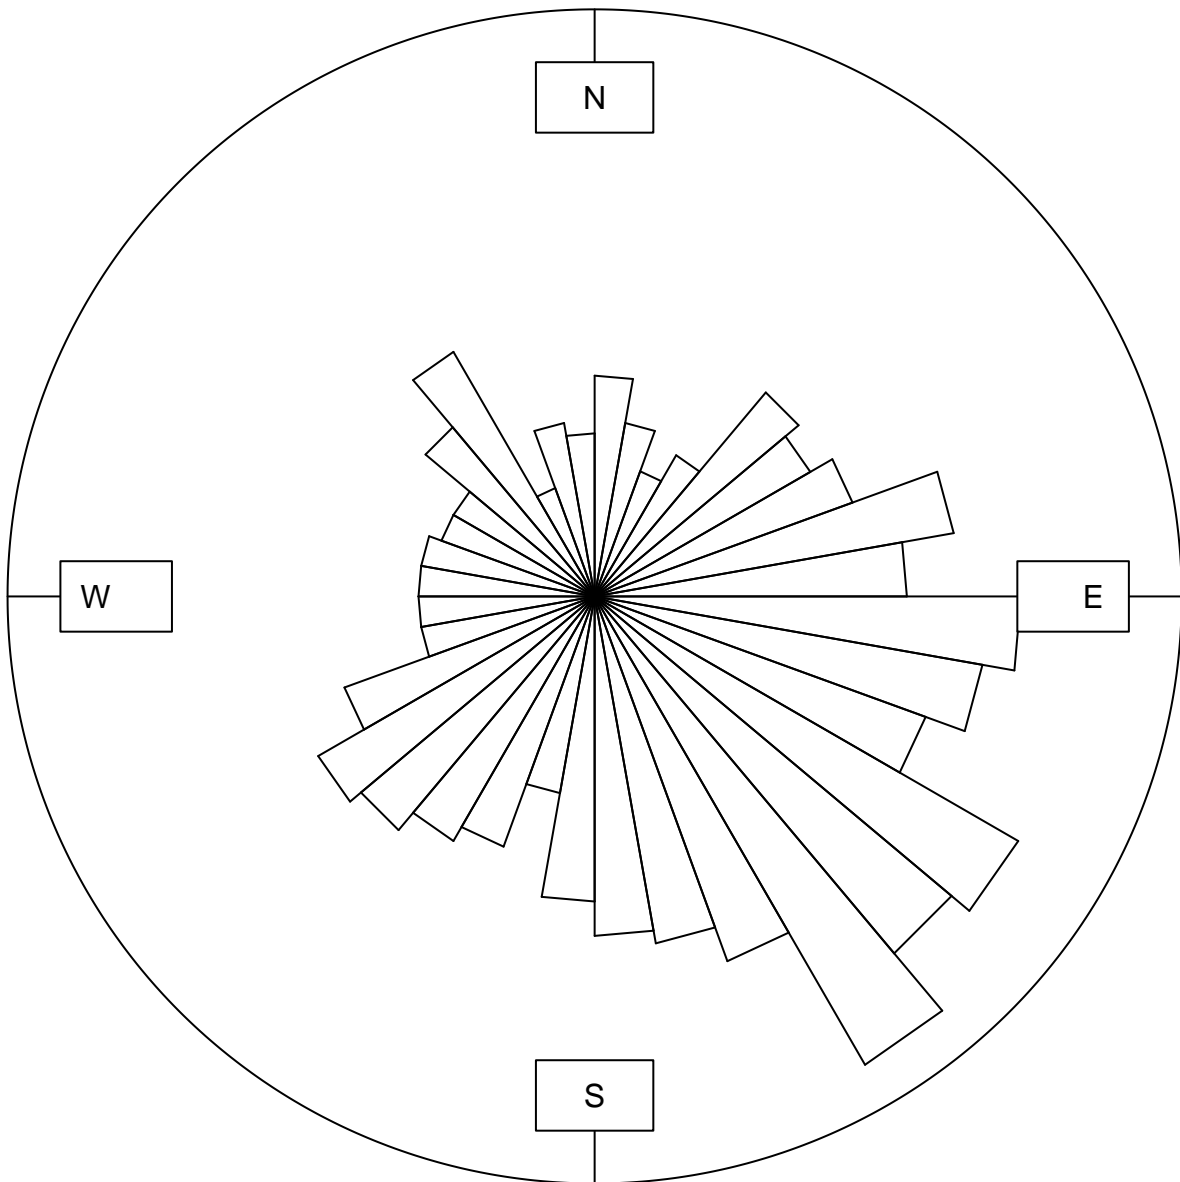

# bootstrap 811

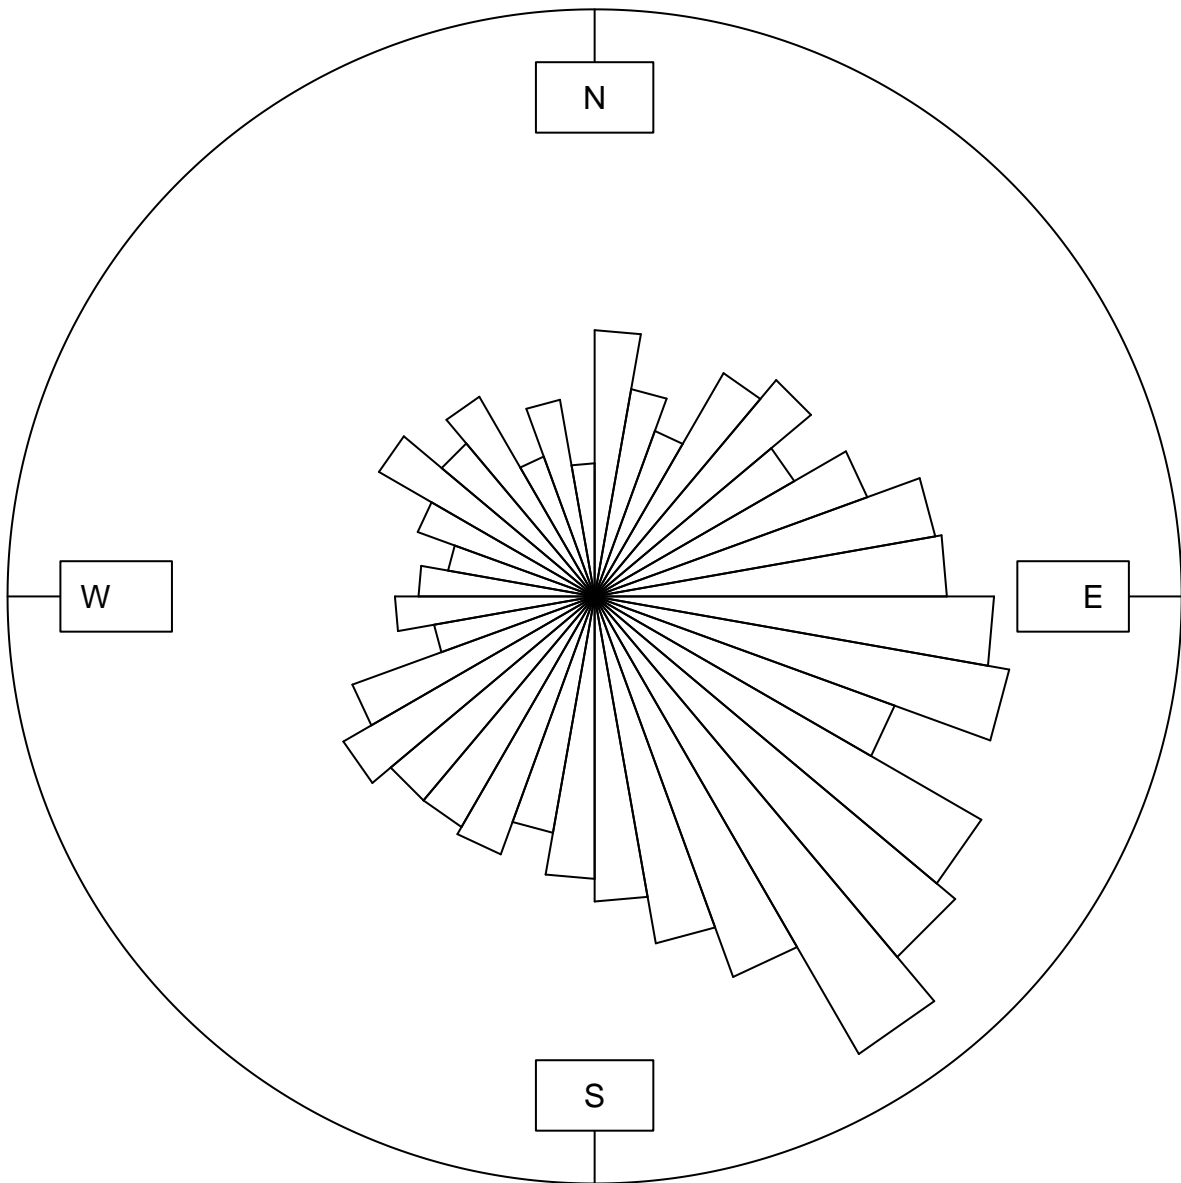

# bootstrap 812

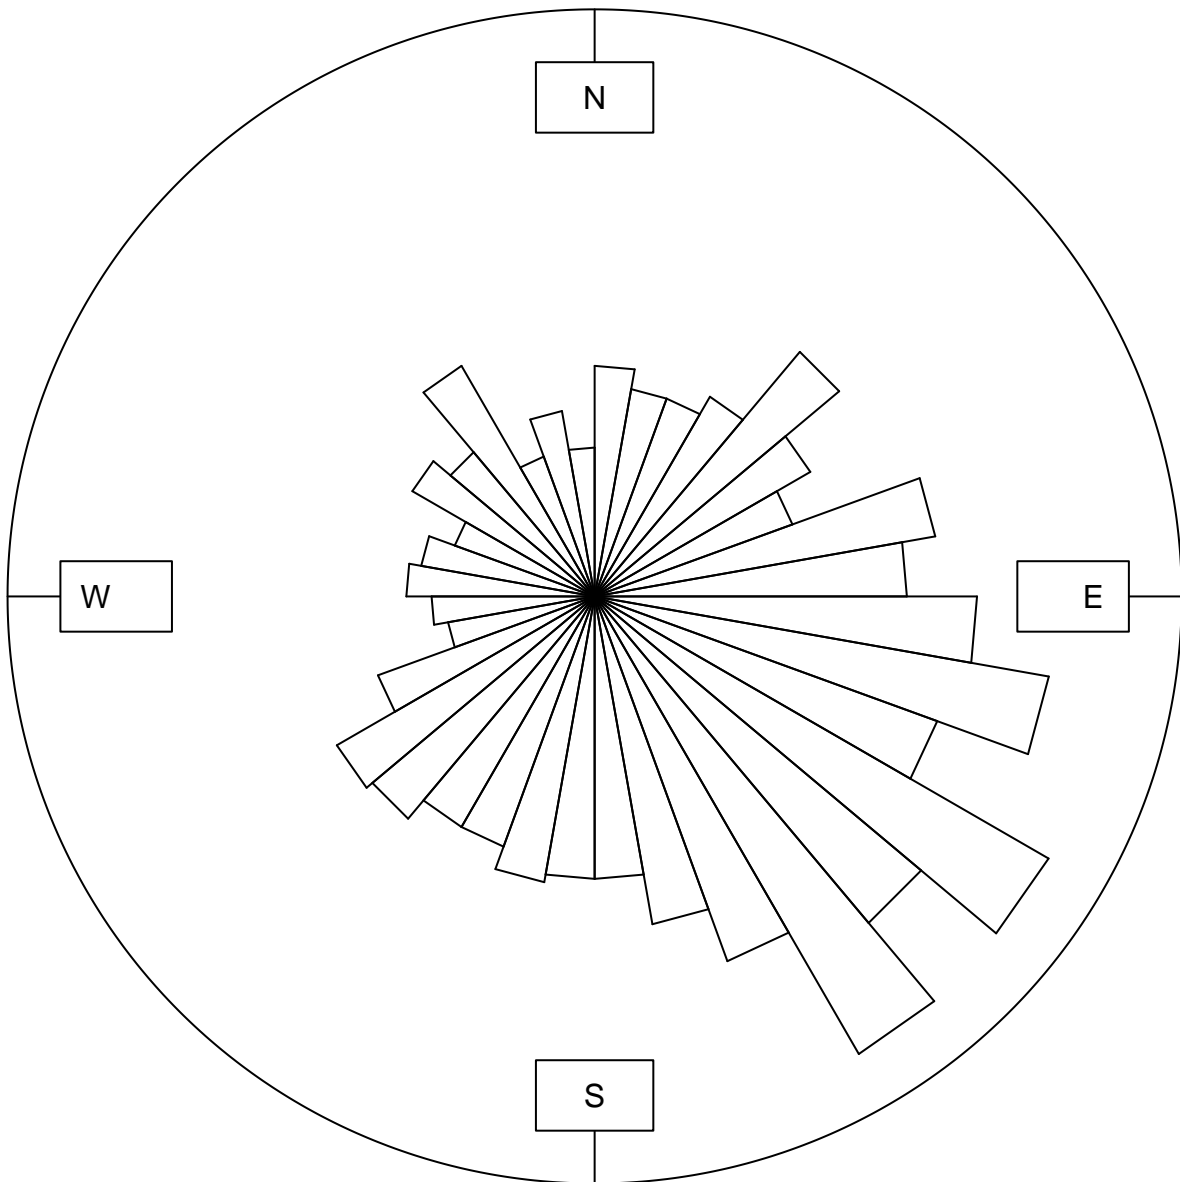

# bootstrap 813

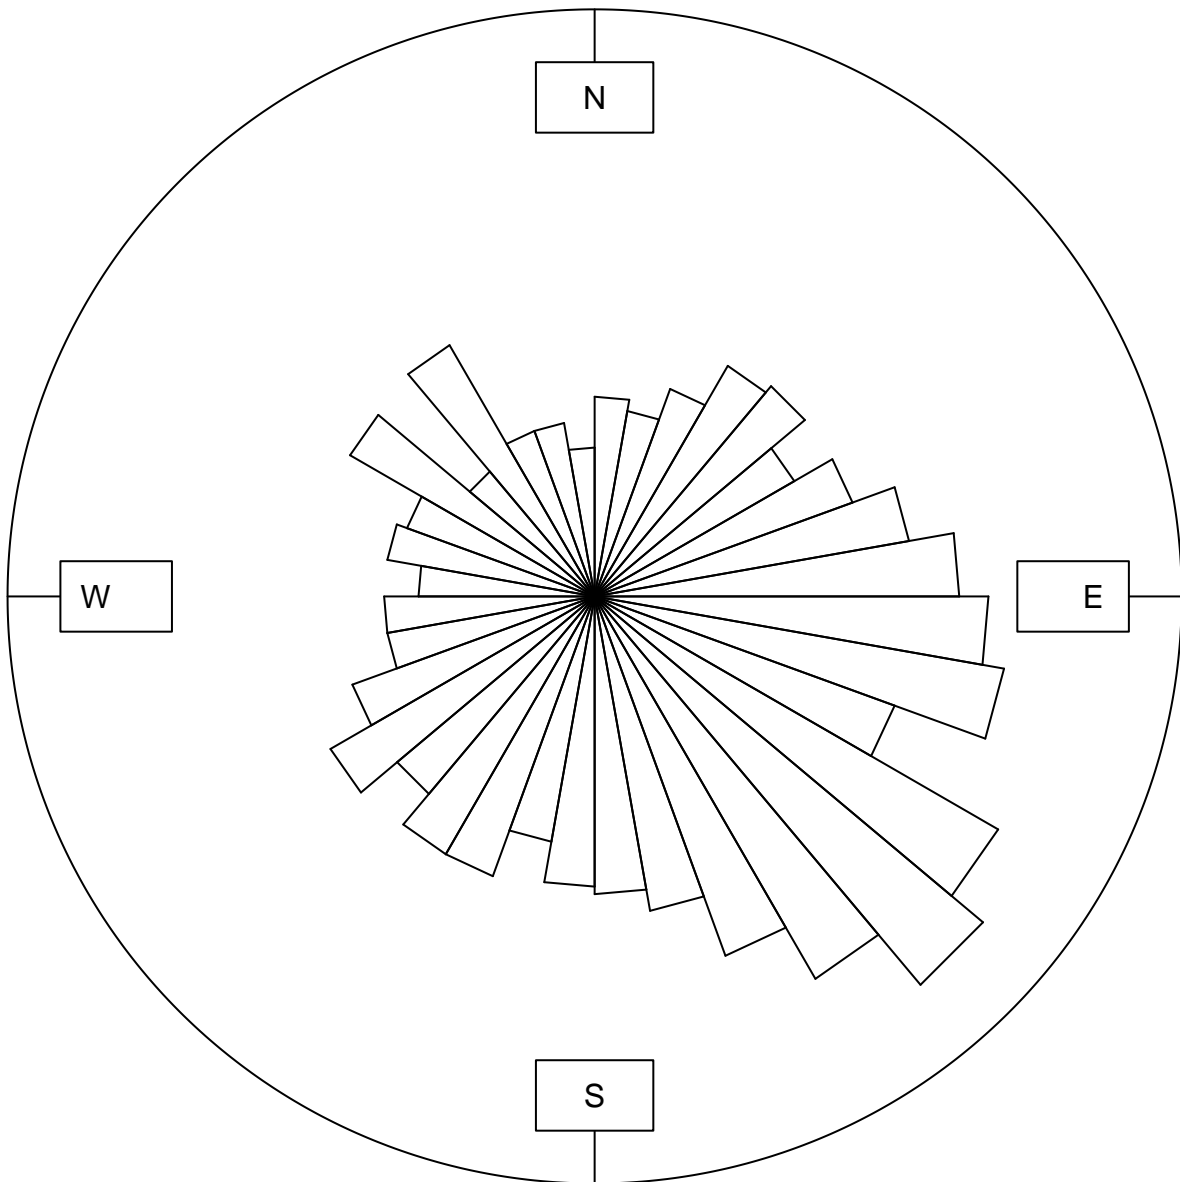

# bootstrap 814

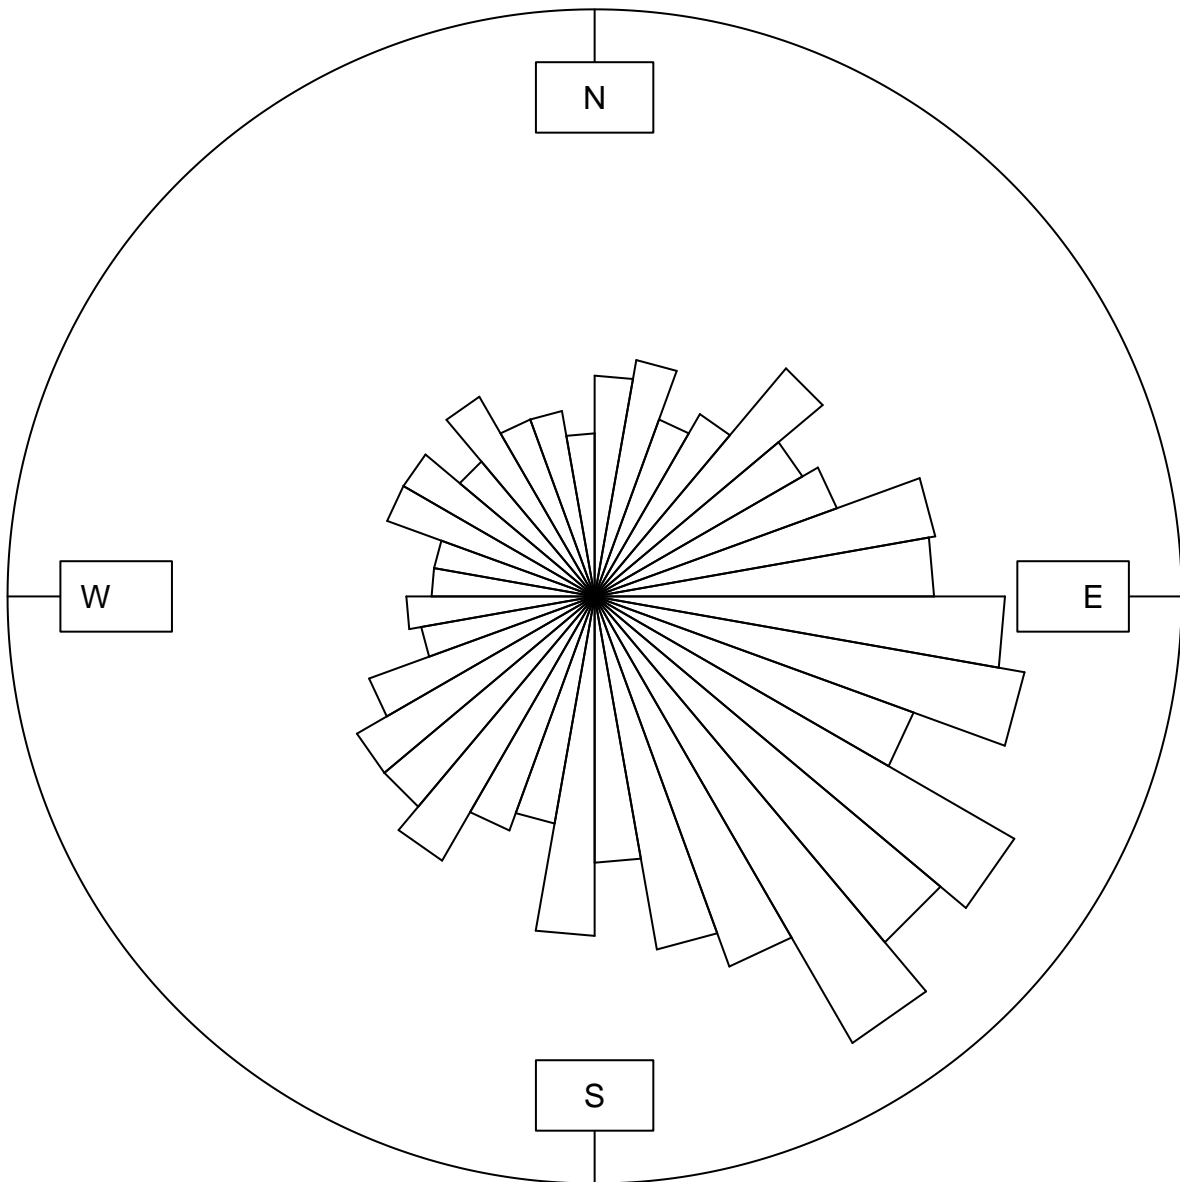

# bootstrap 815

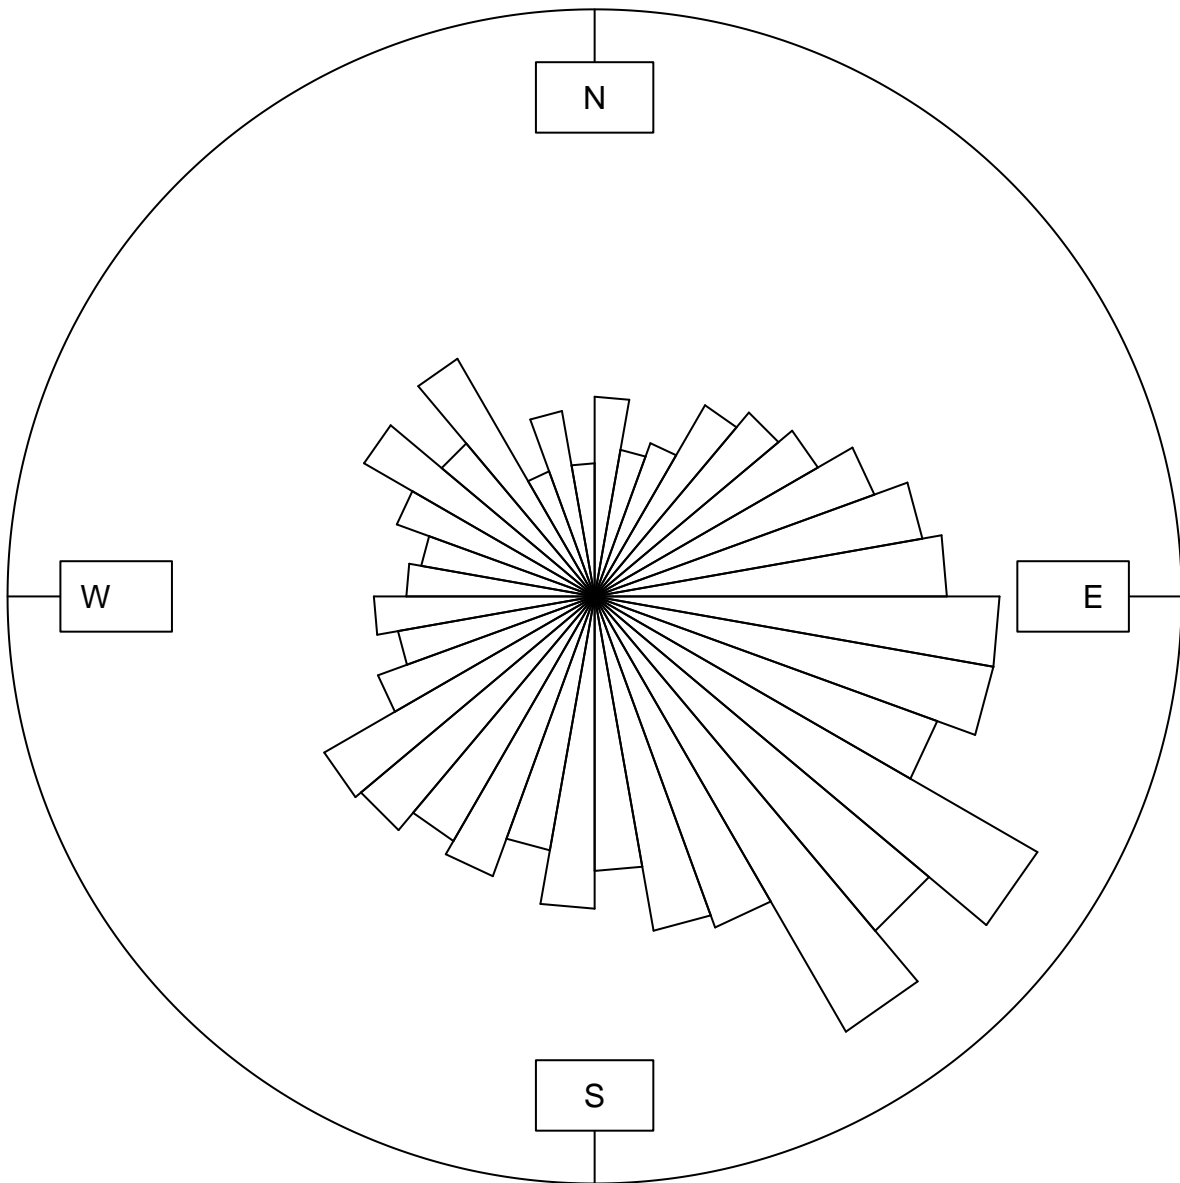

# bootstrap 816

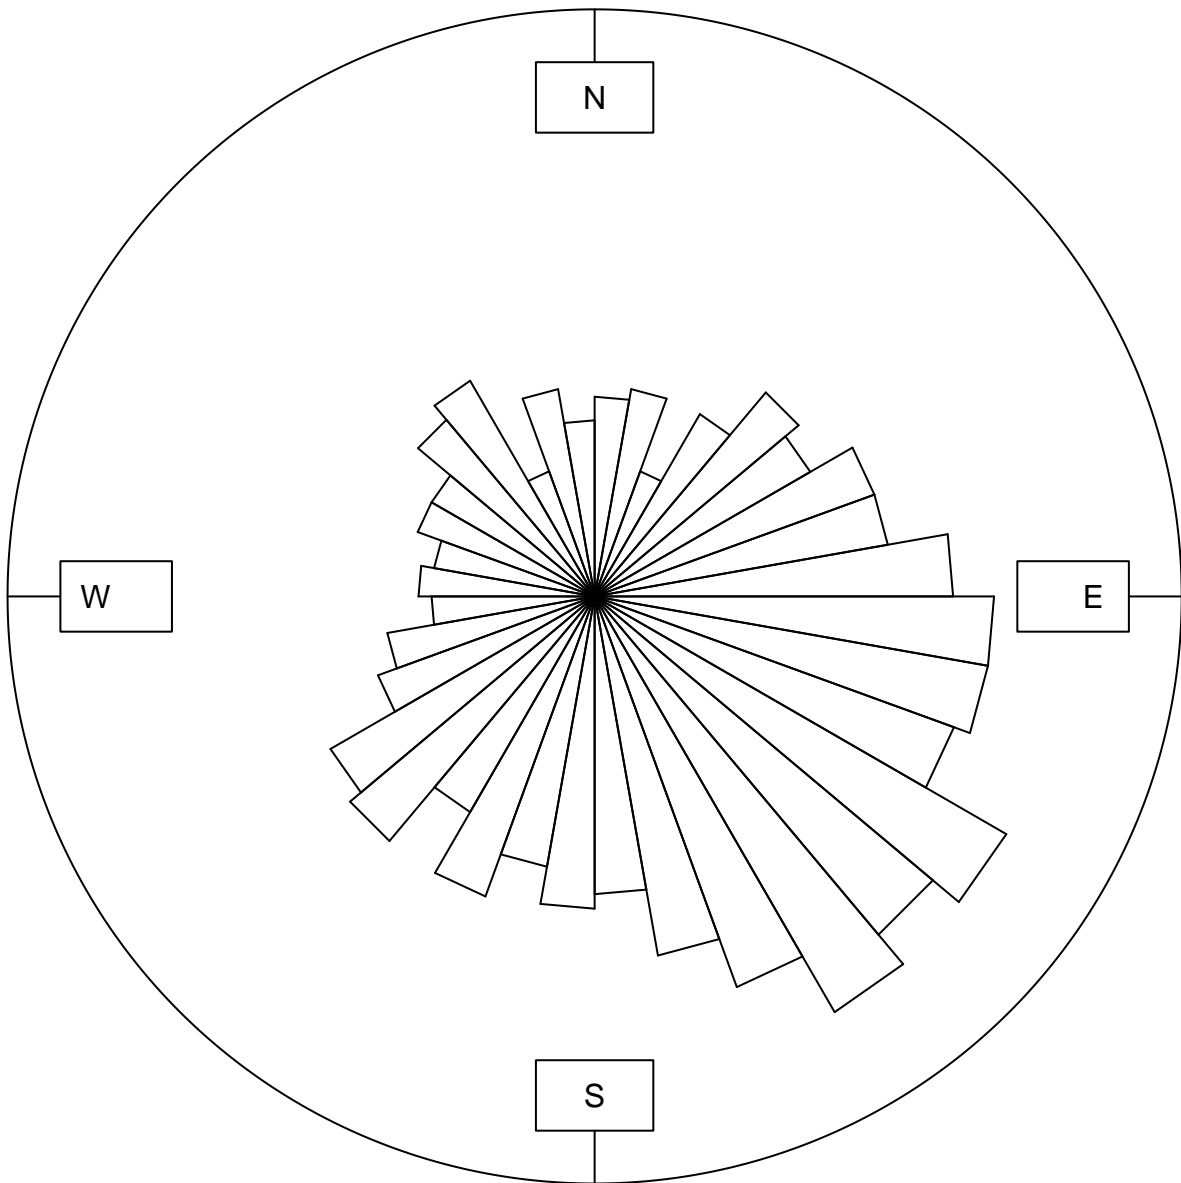



# bootstrap 817

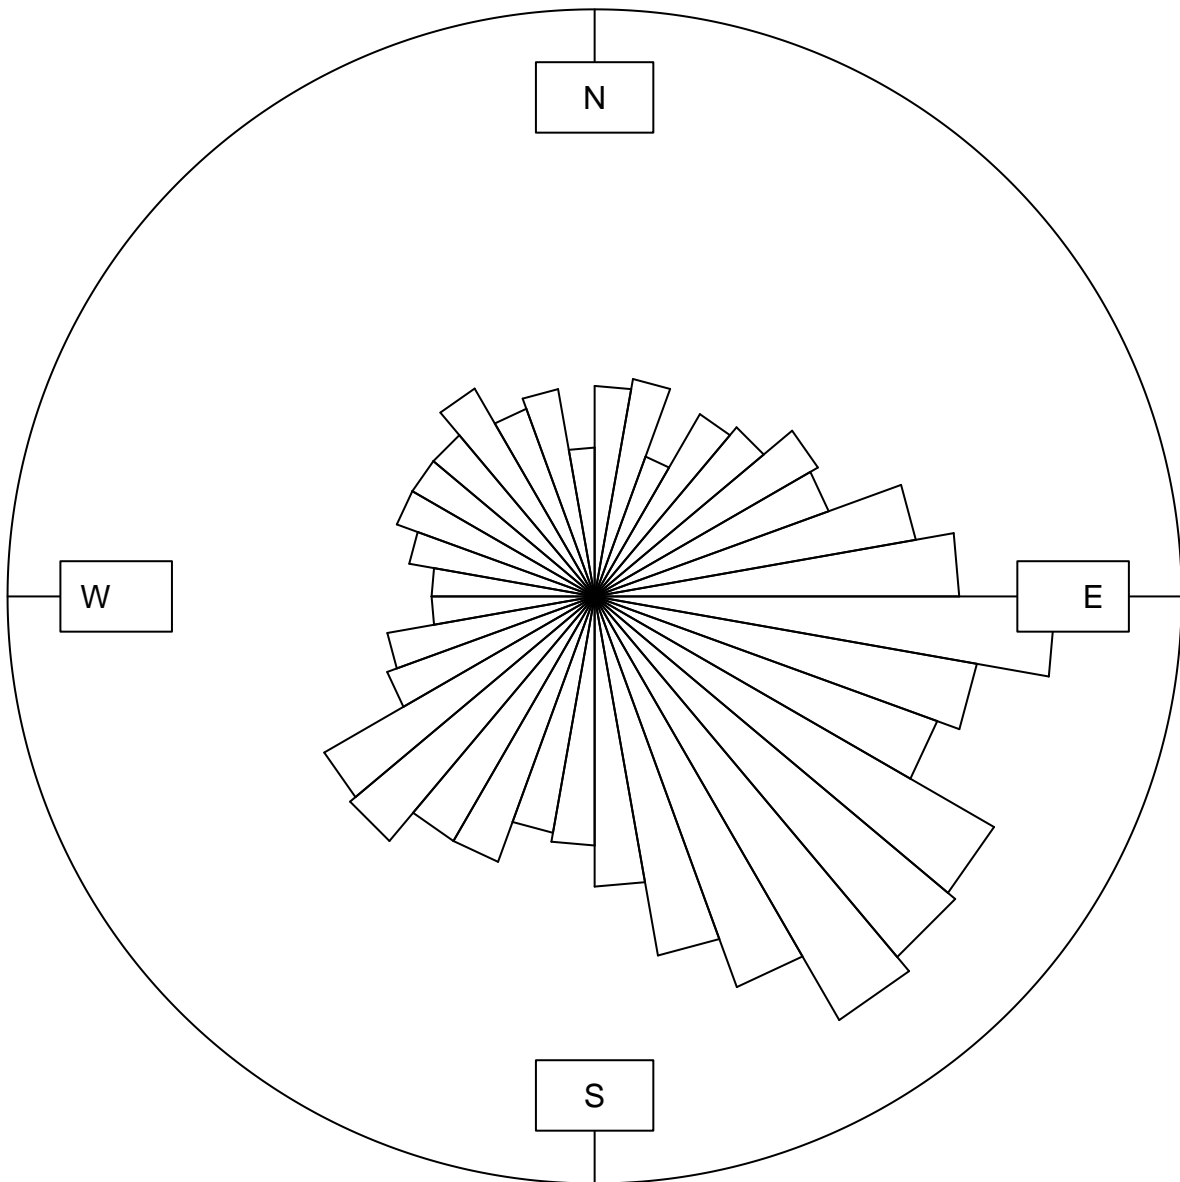

# bootstrap 818

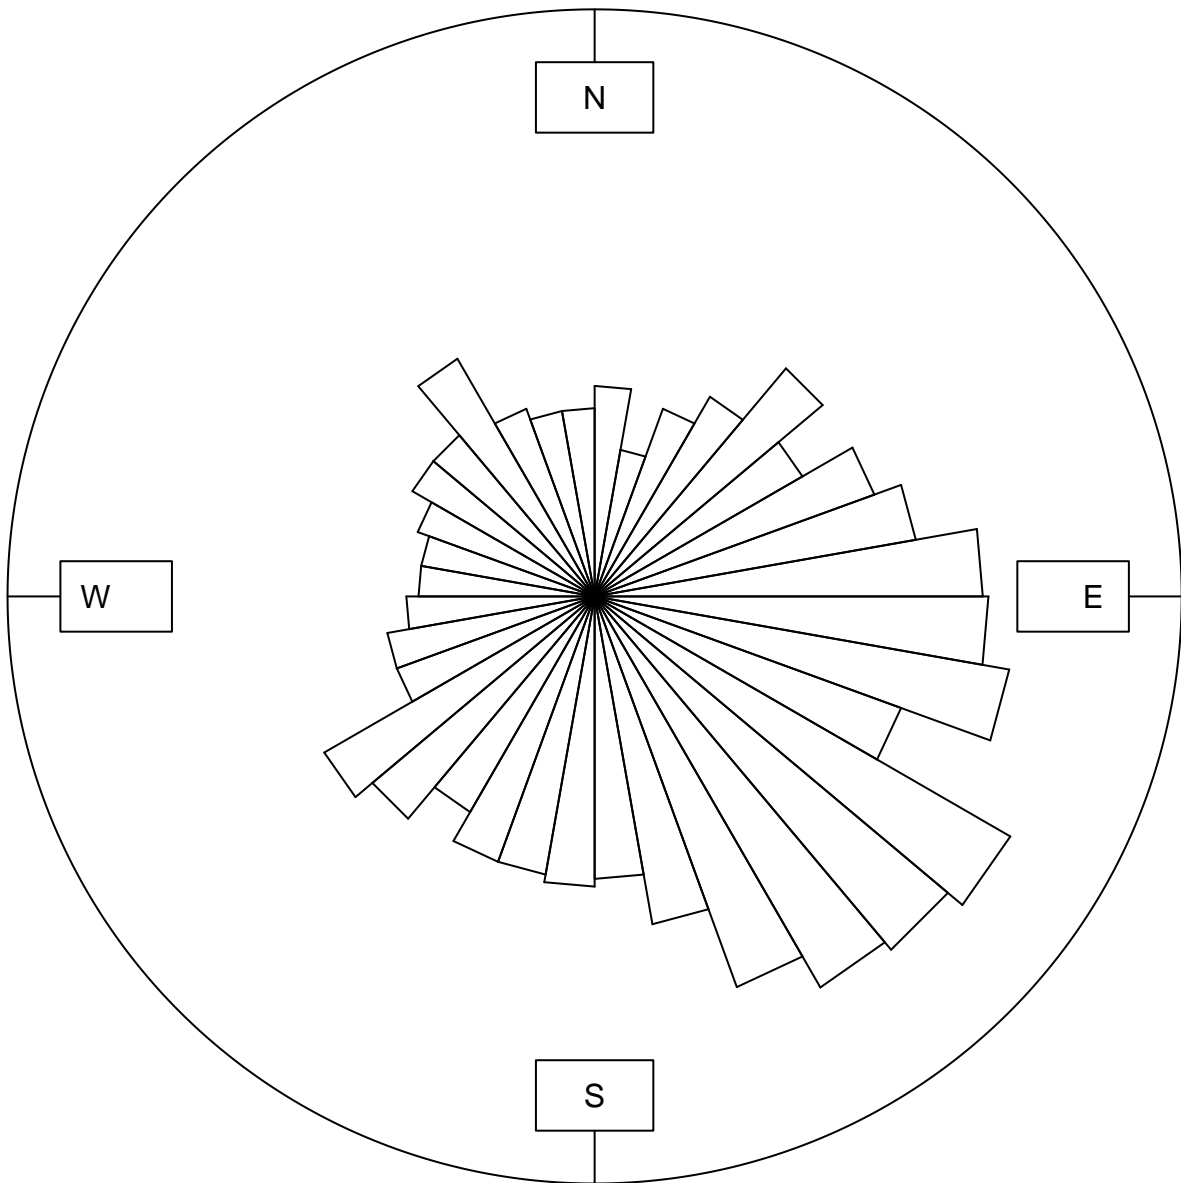

# bootstrap 819

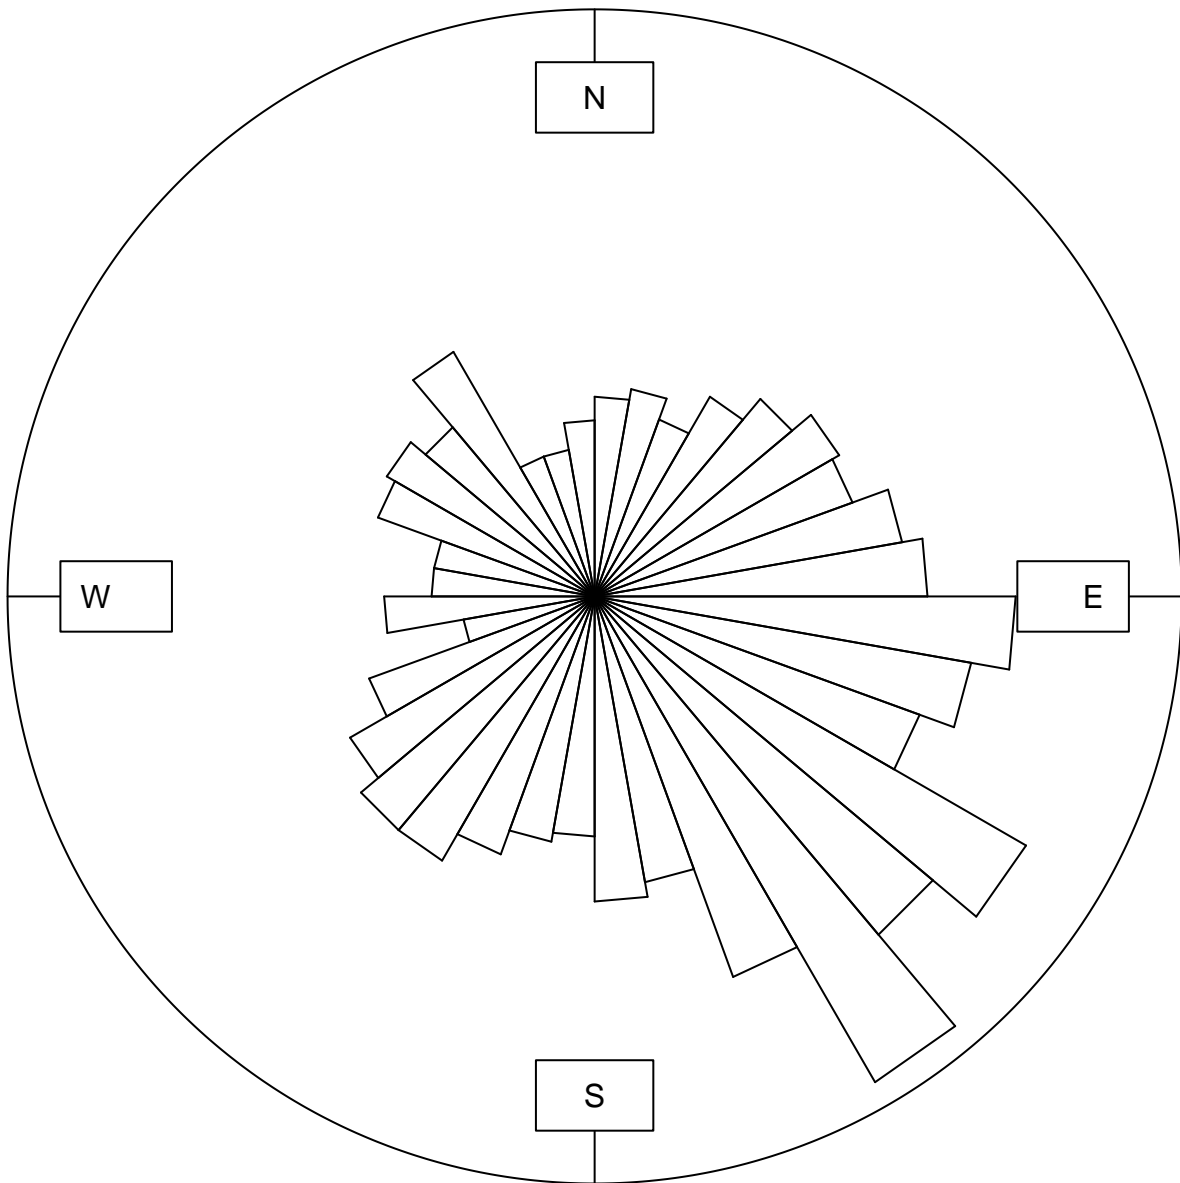

# bootstrap 820

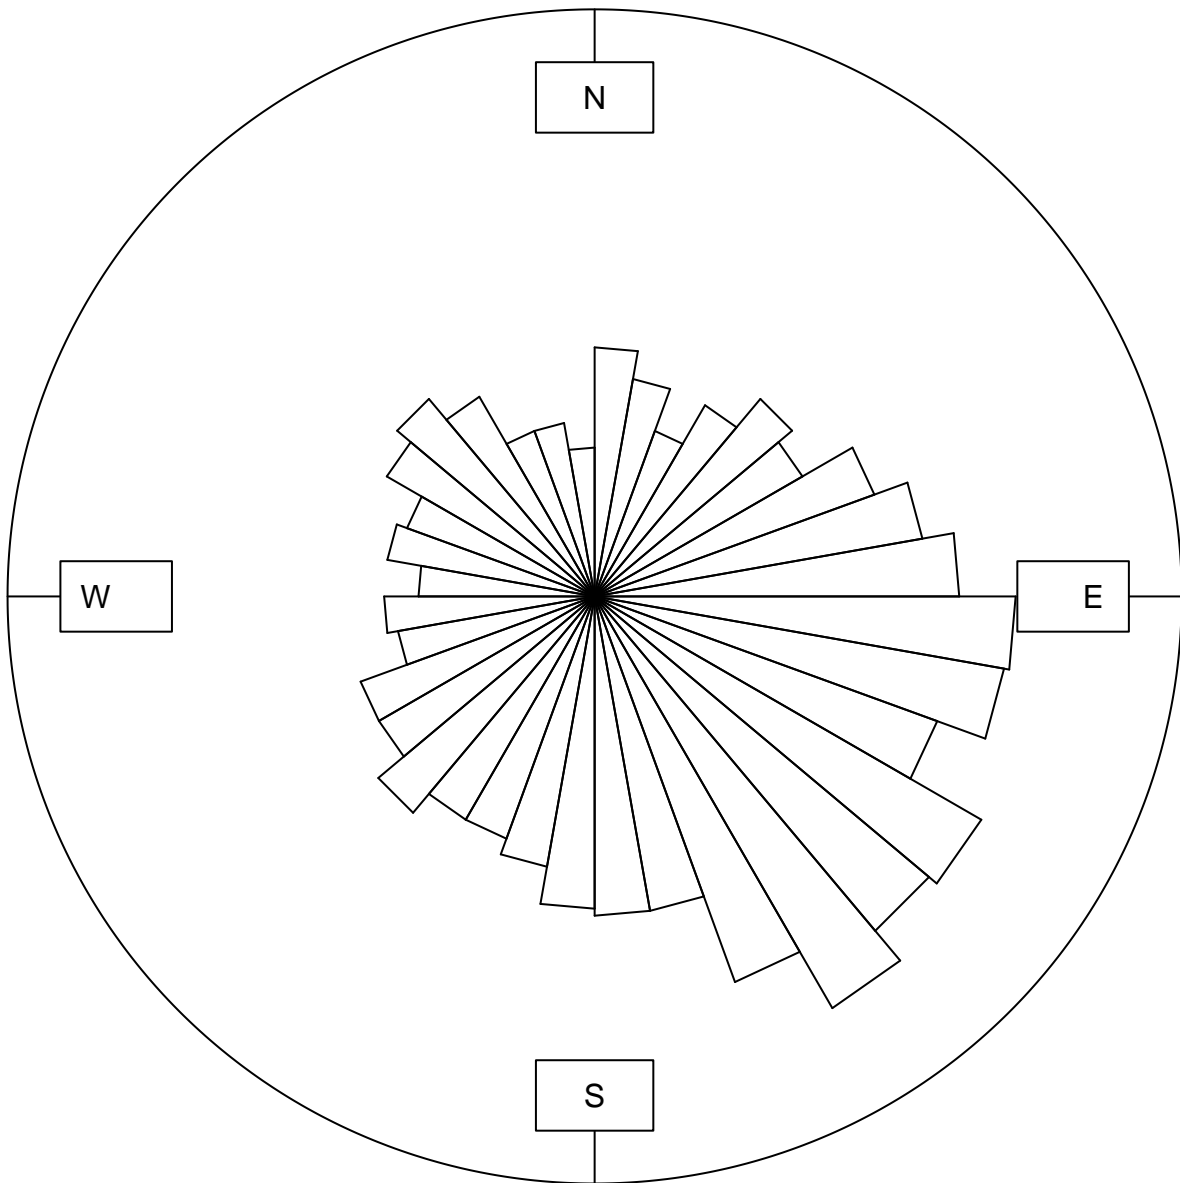

# bootstrap 821

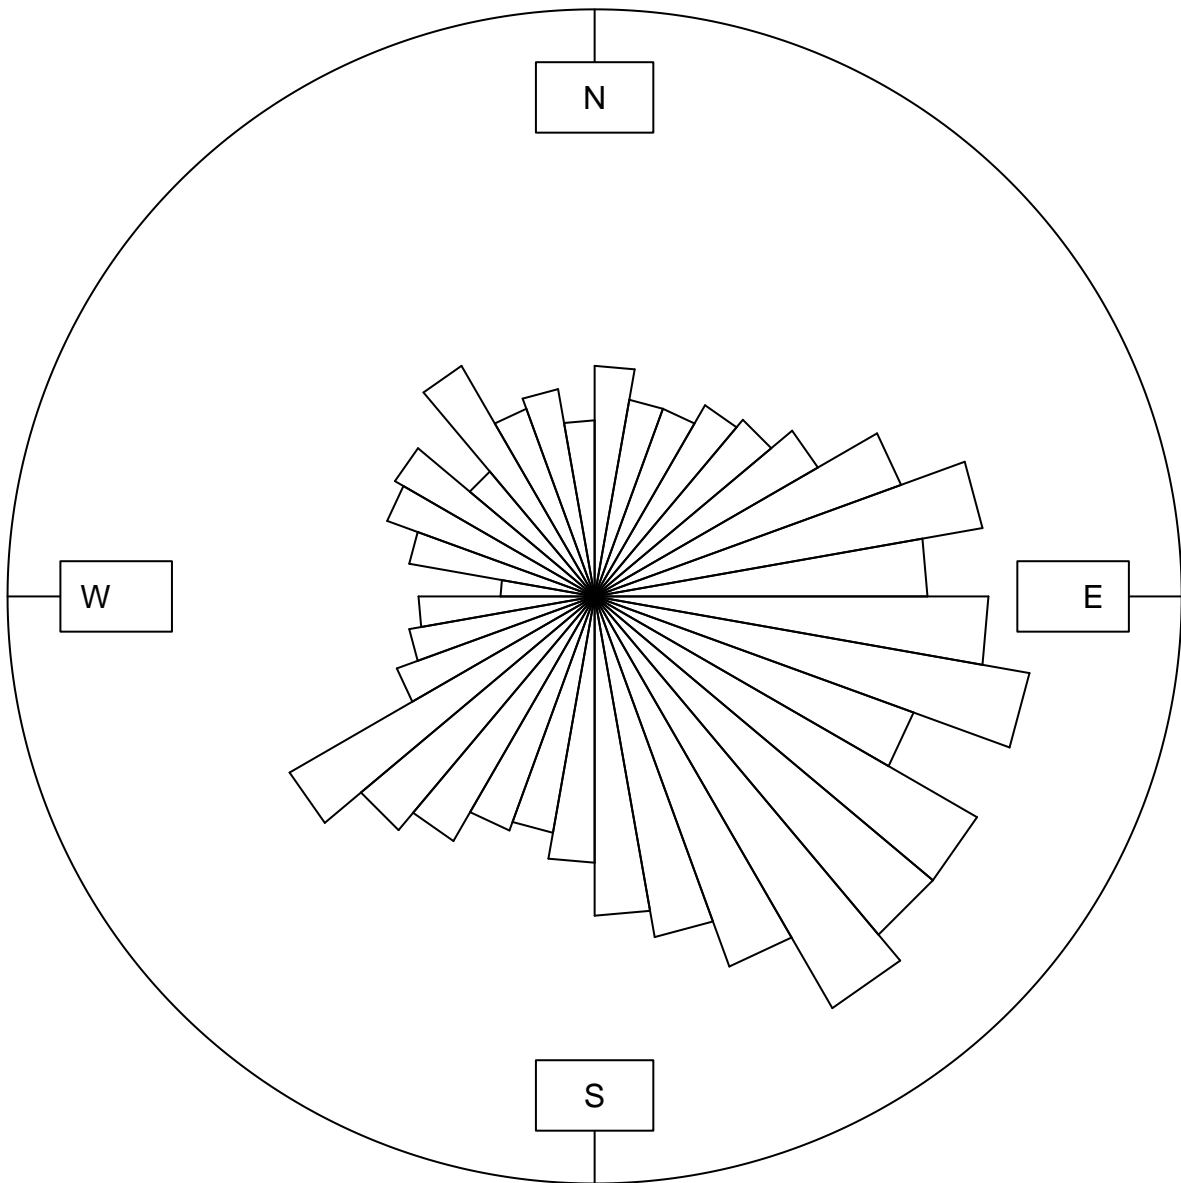

# bootstrap 822

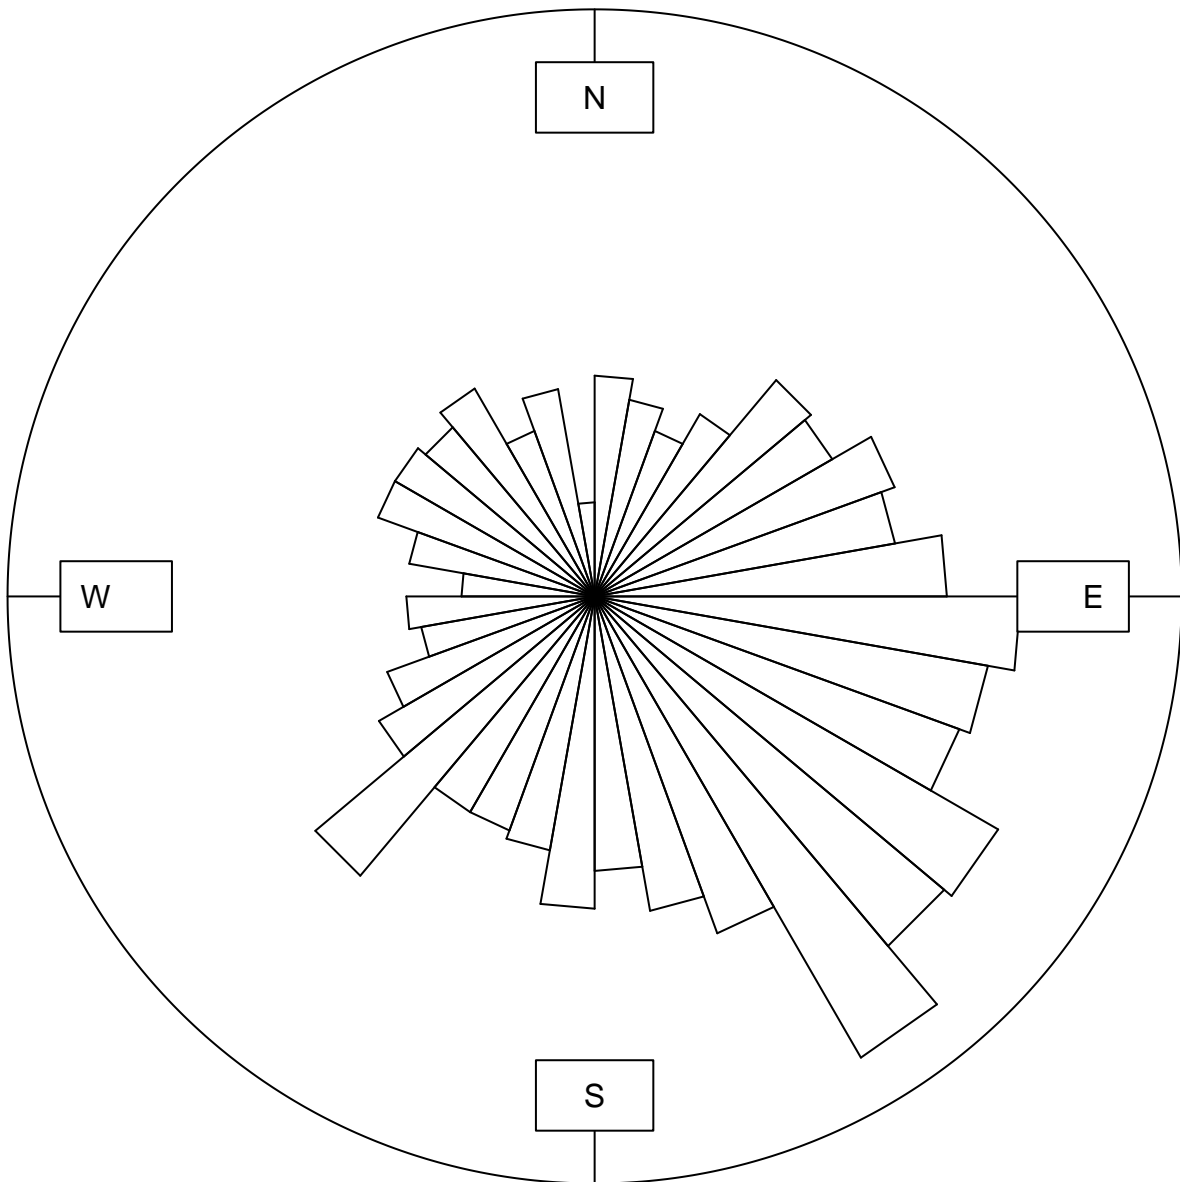

# bootstrap 823

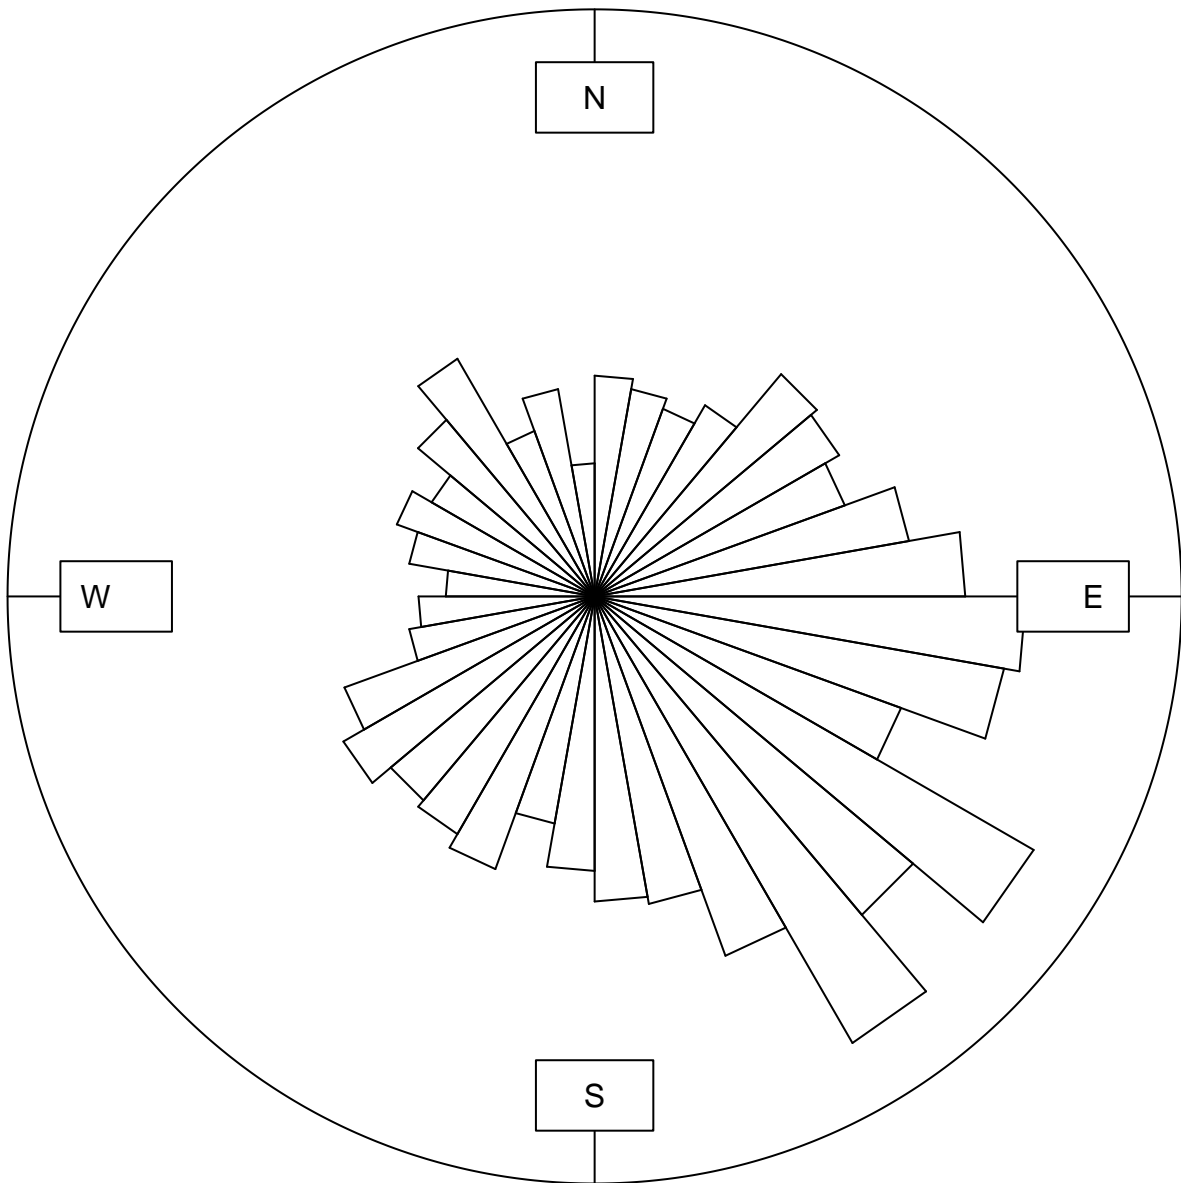

# bootstrap 824

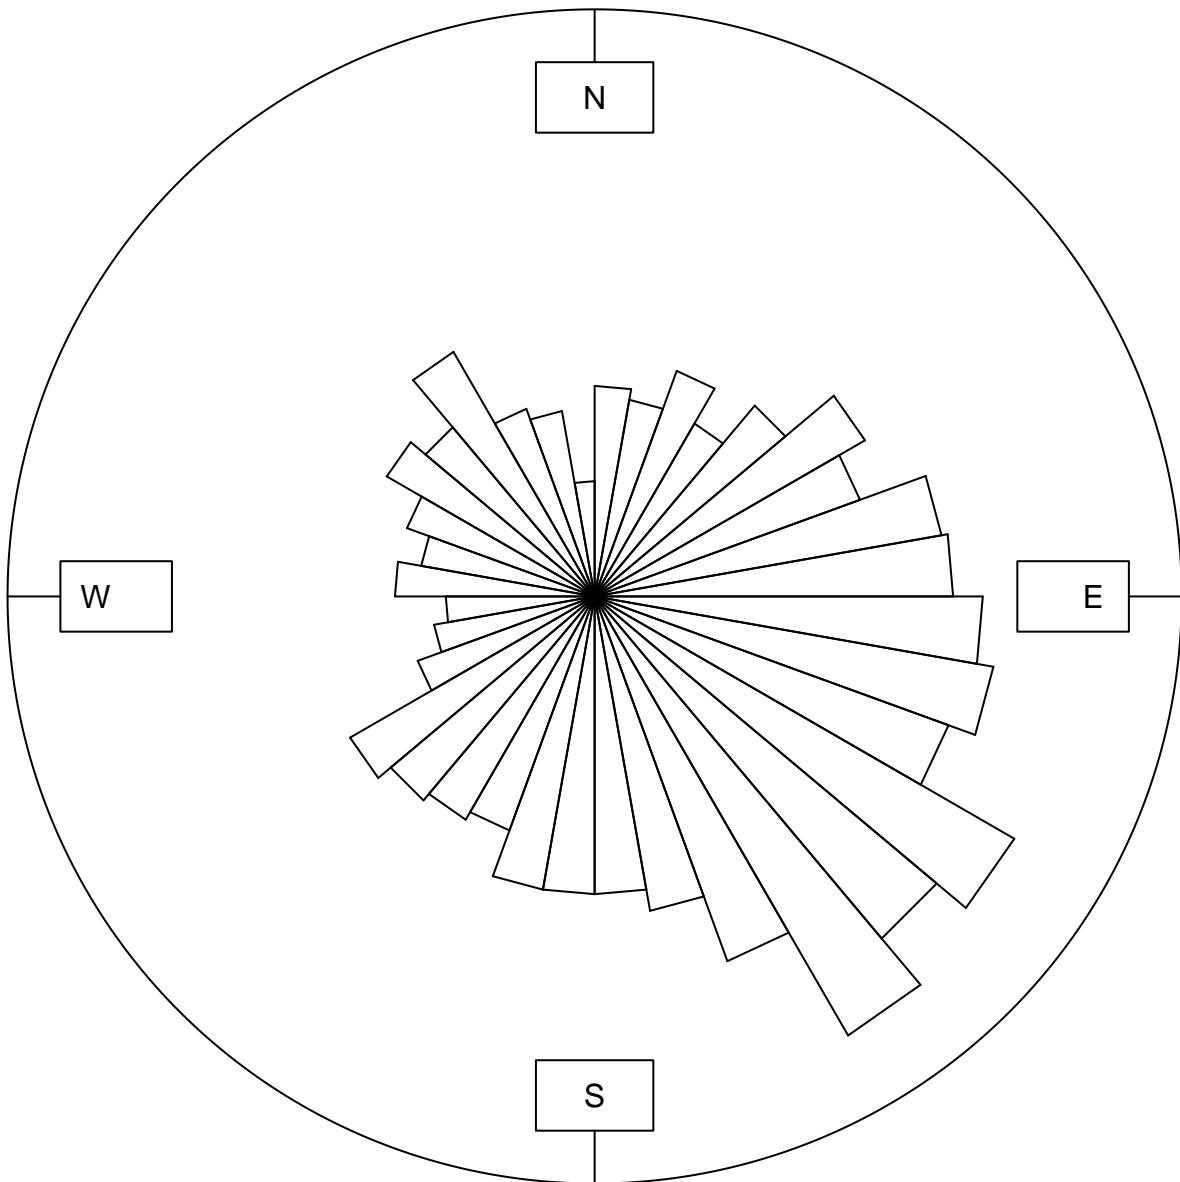



# bootstrap 825

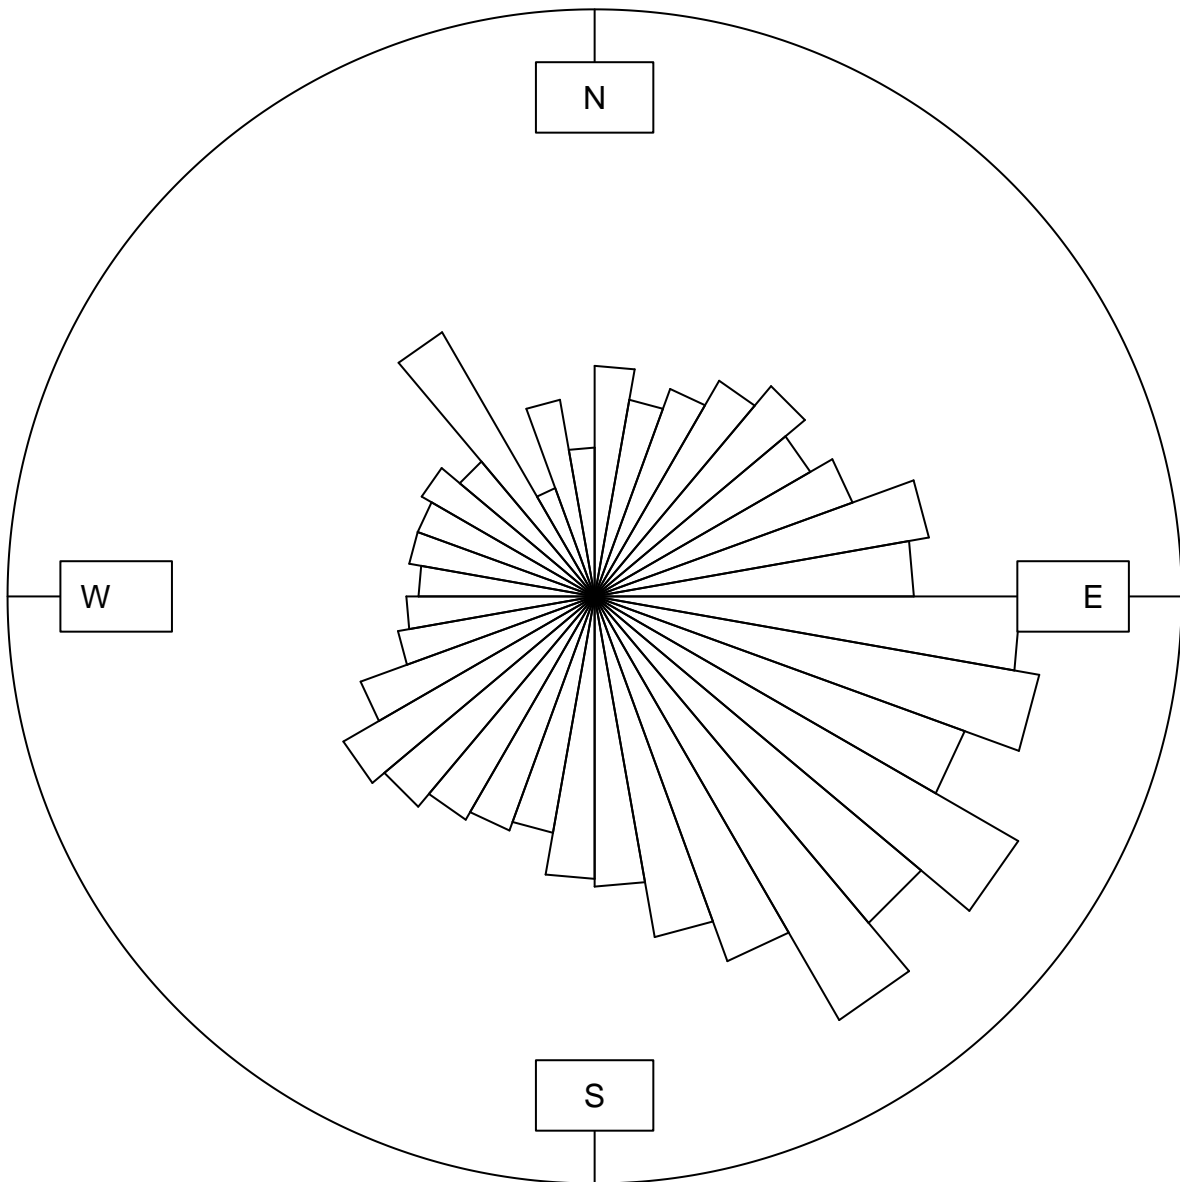

# bootstrap 826

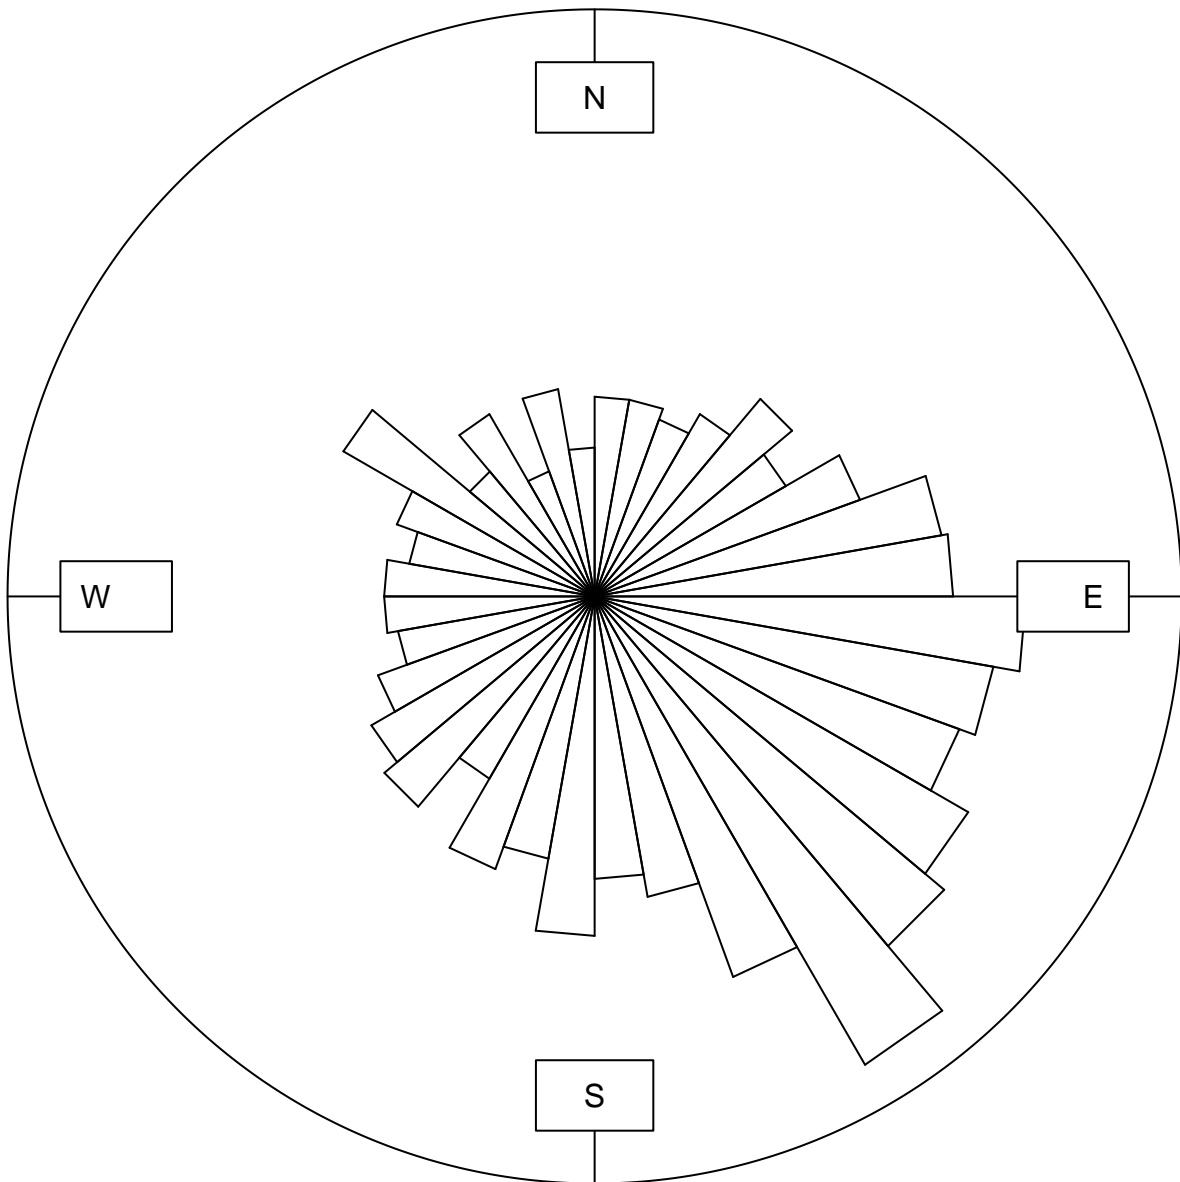

# bootstrap 827

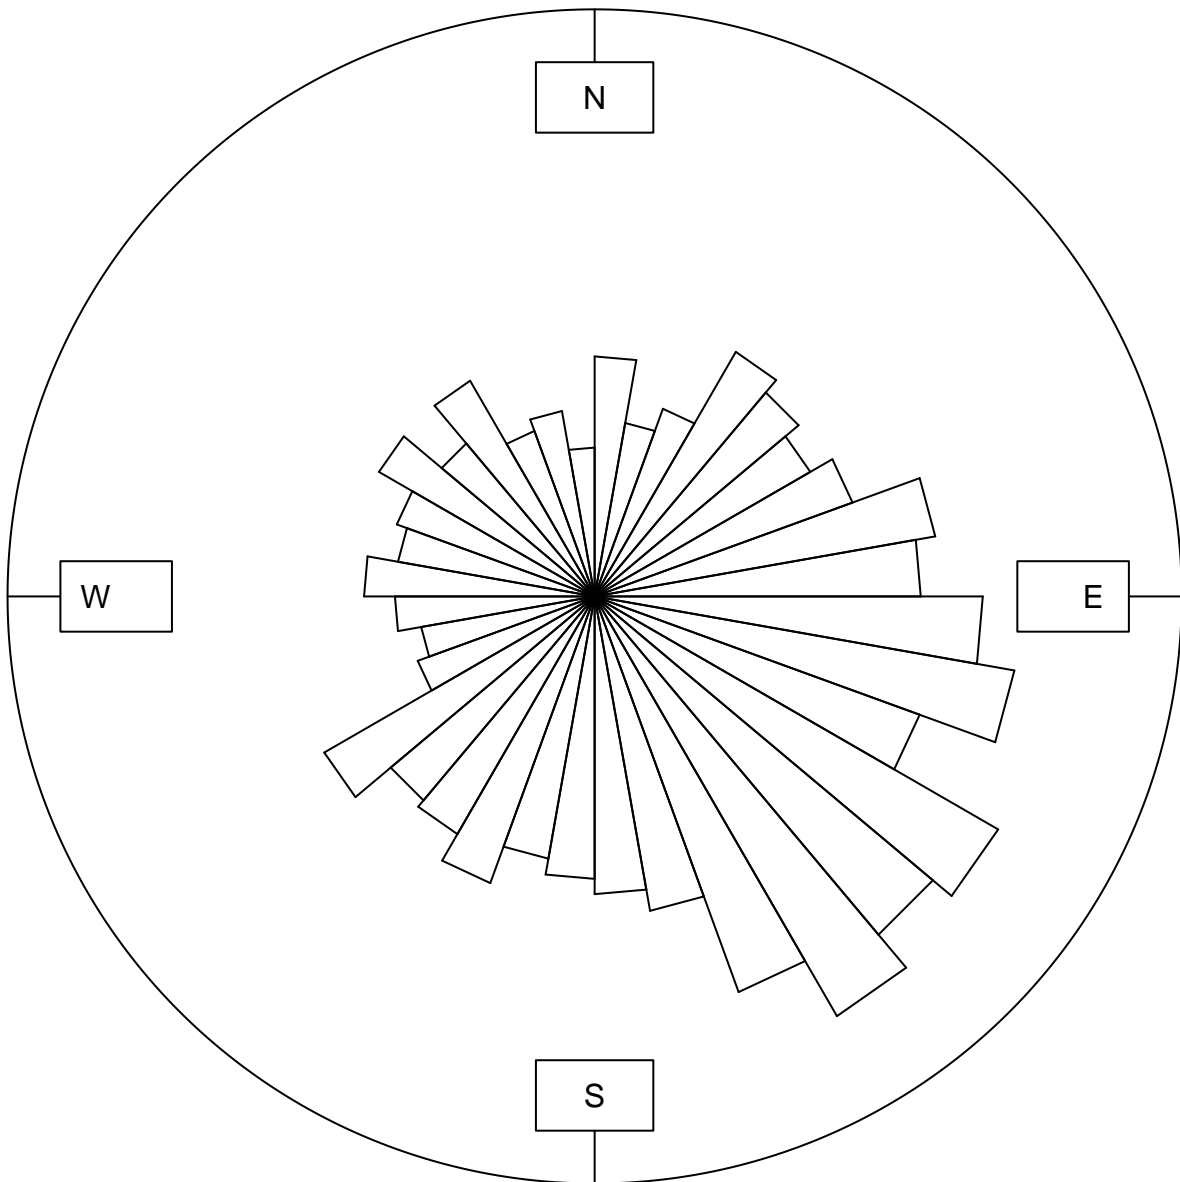

# bootstrap 828

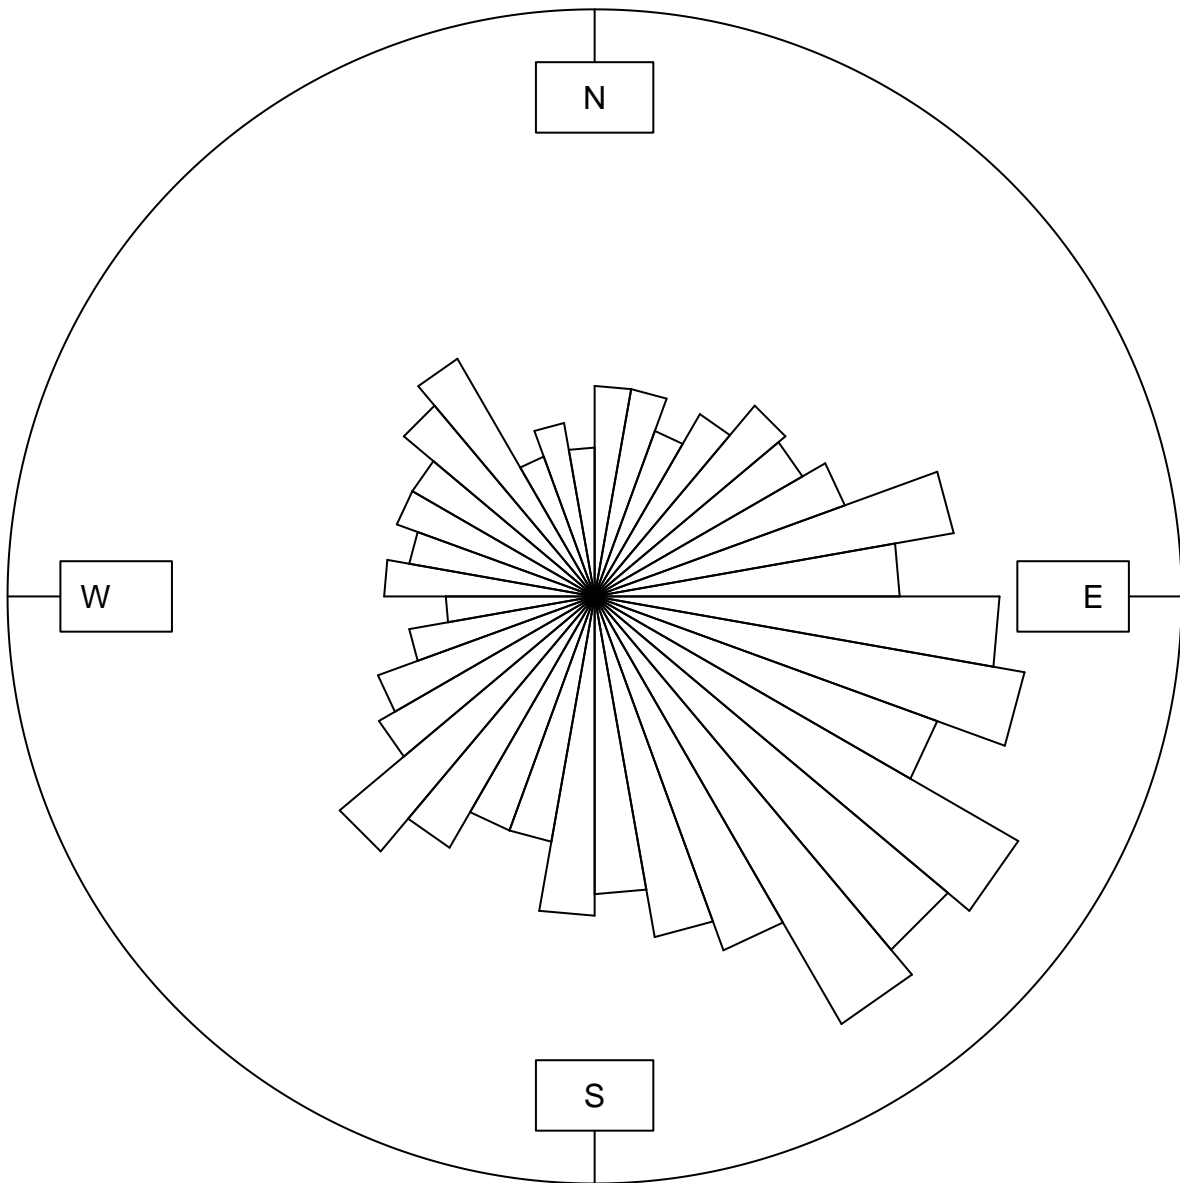

# bootstrap 829

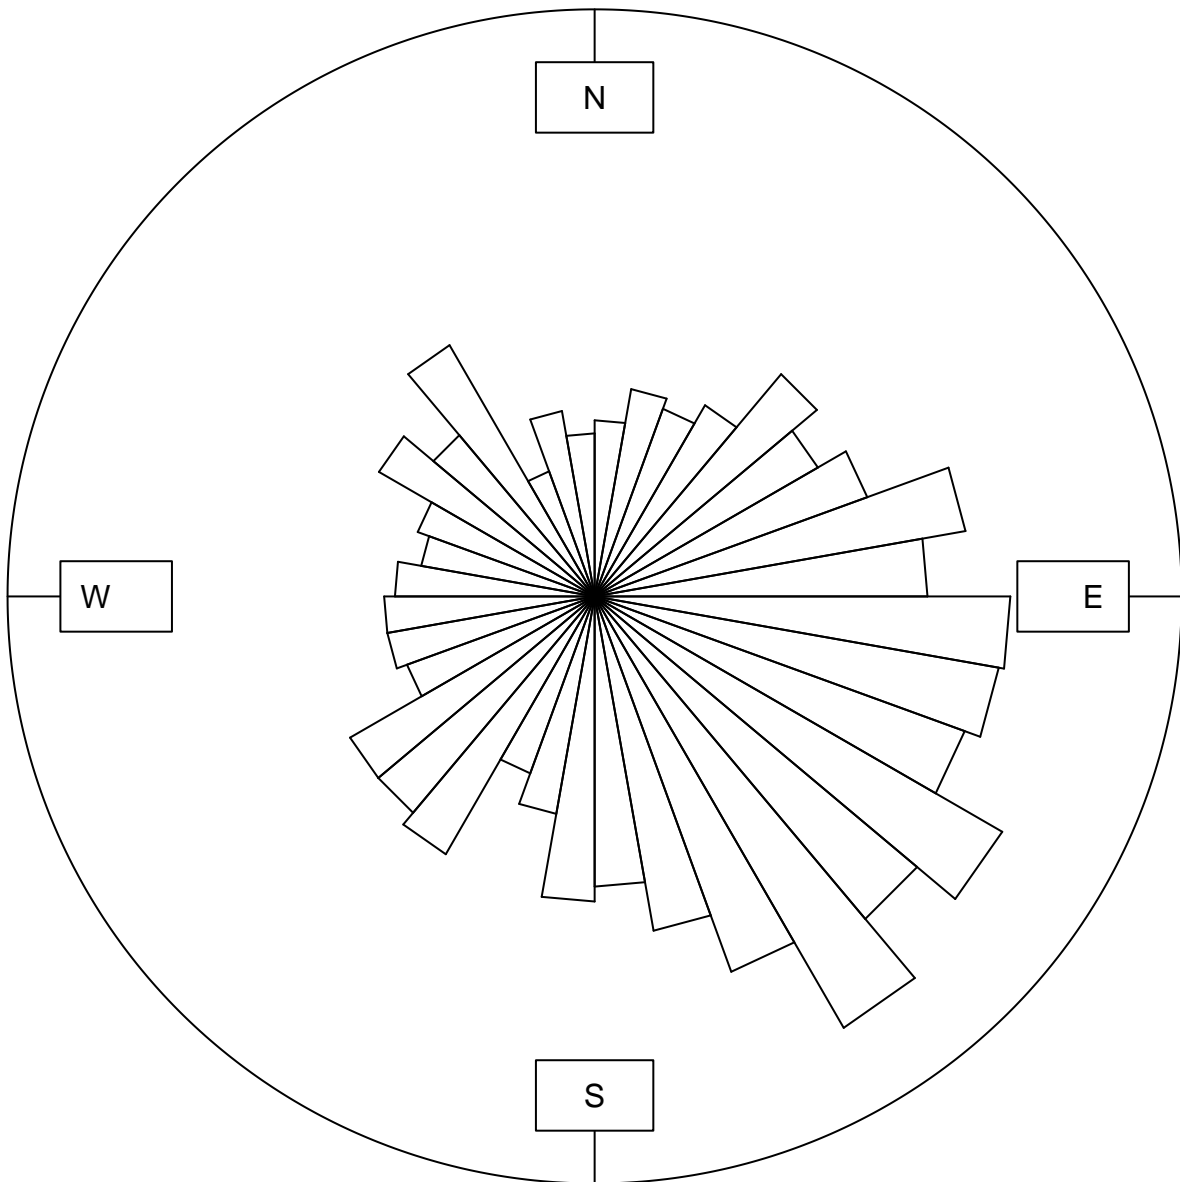

# bootstrap 830

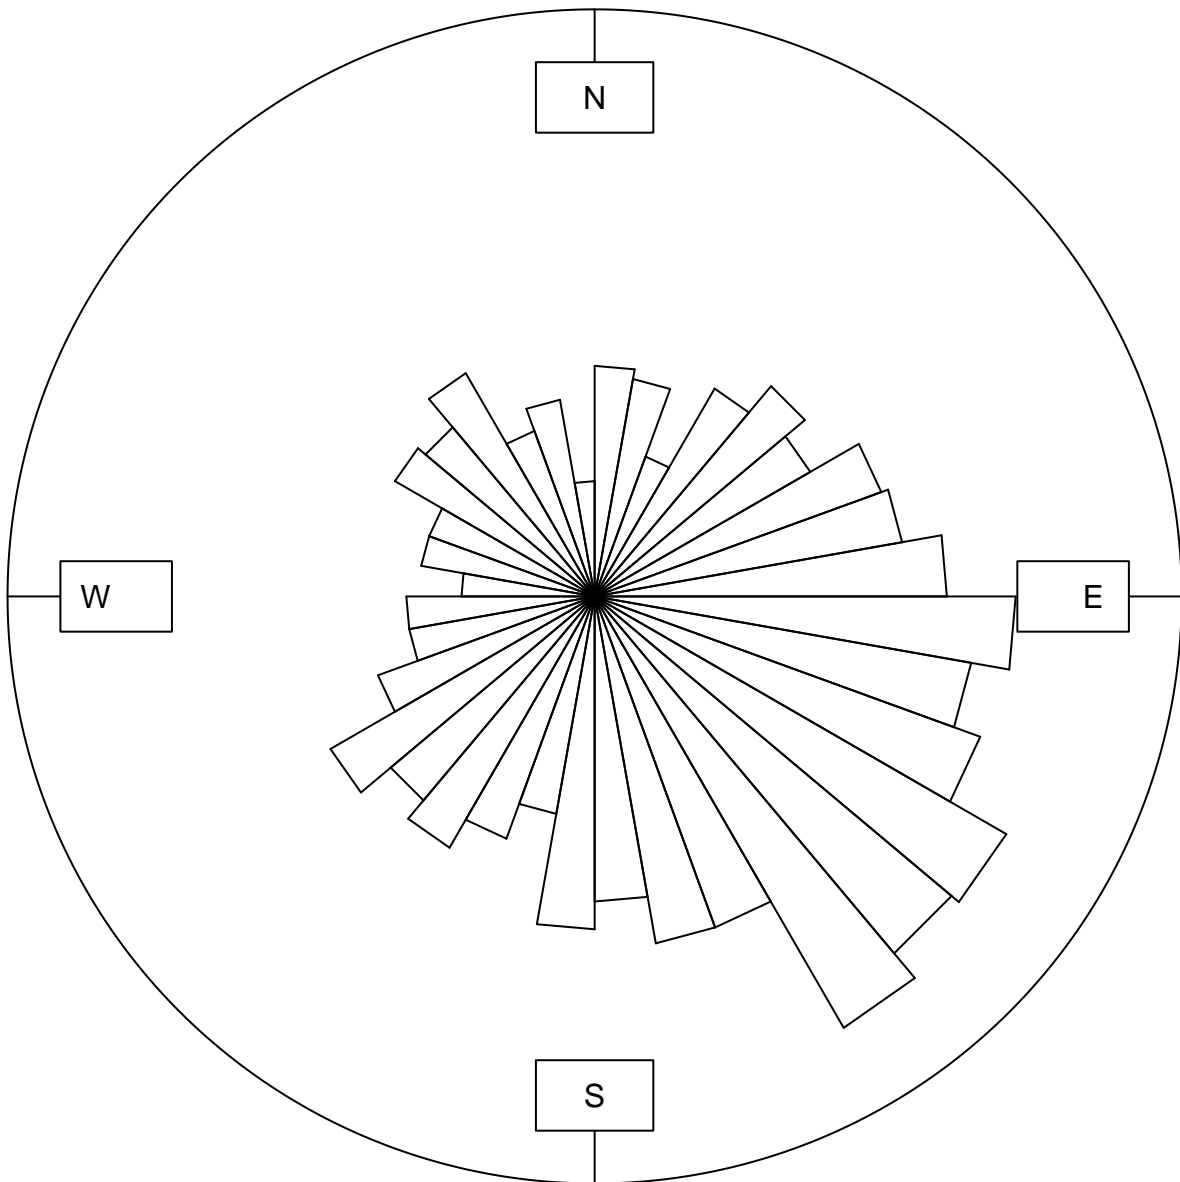

# bootstrap 831

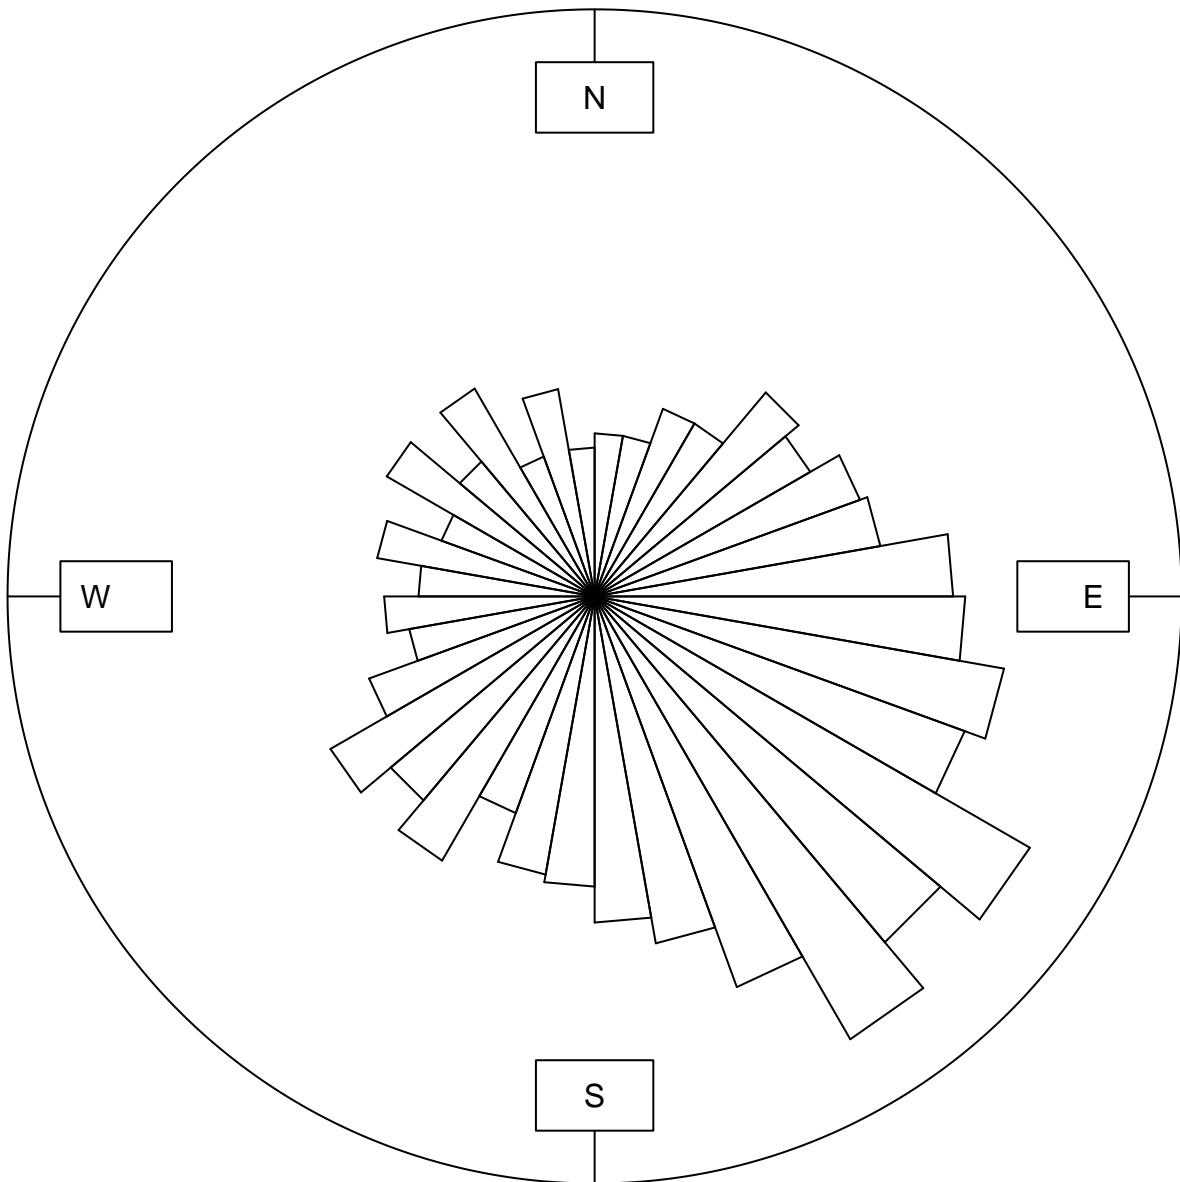

# bootstrap 832

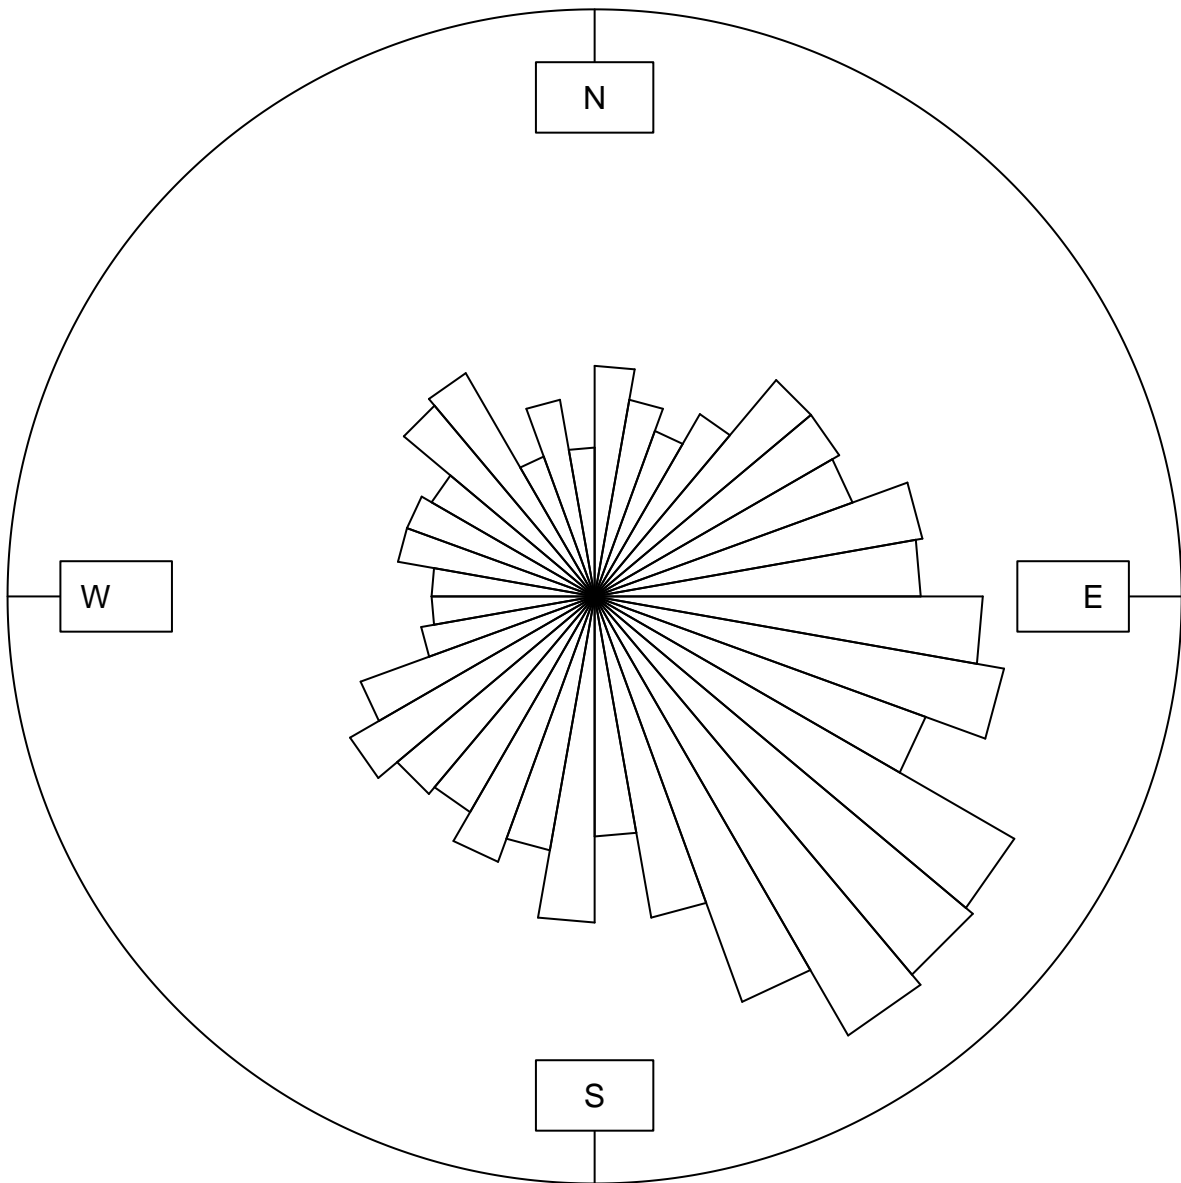



# bootstrap 833

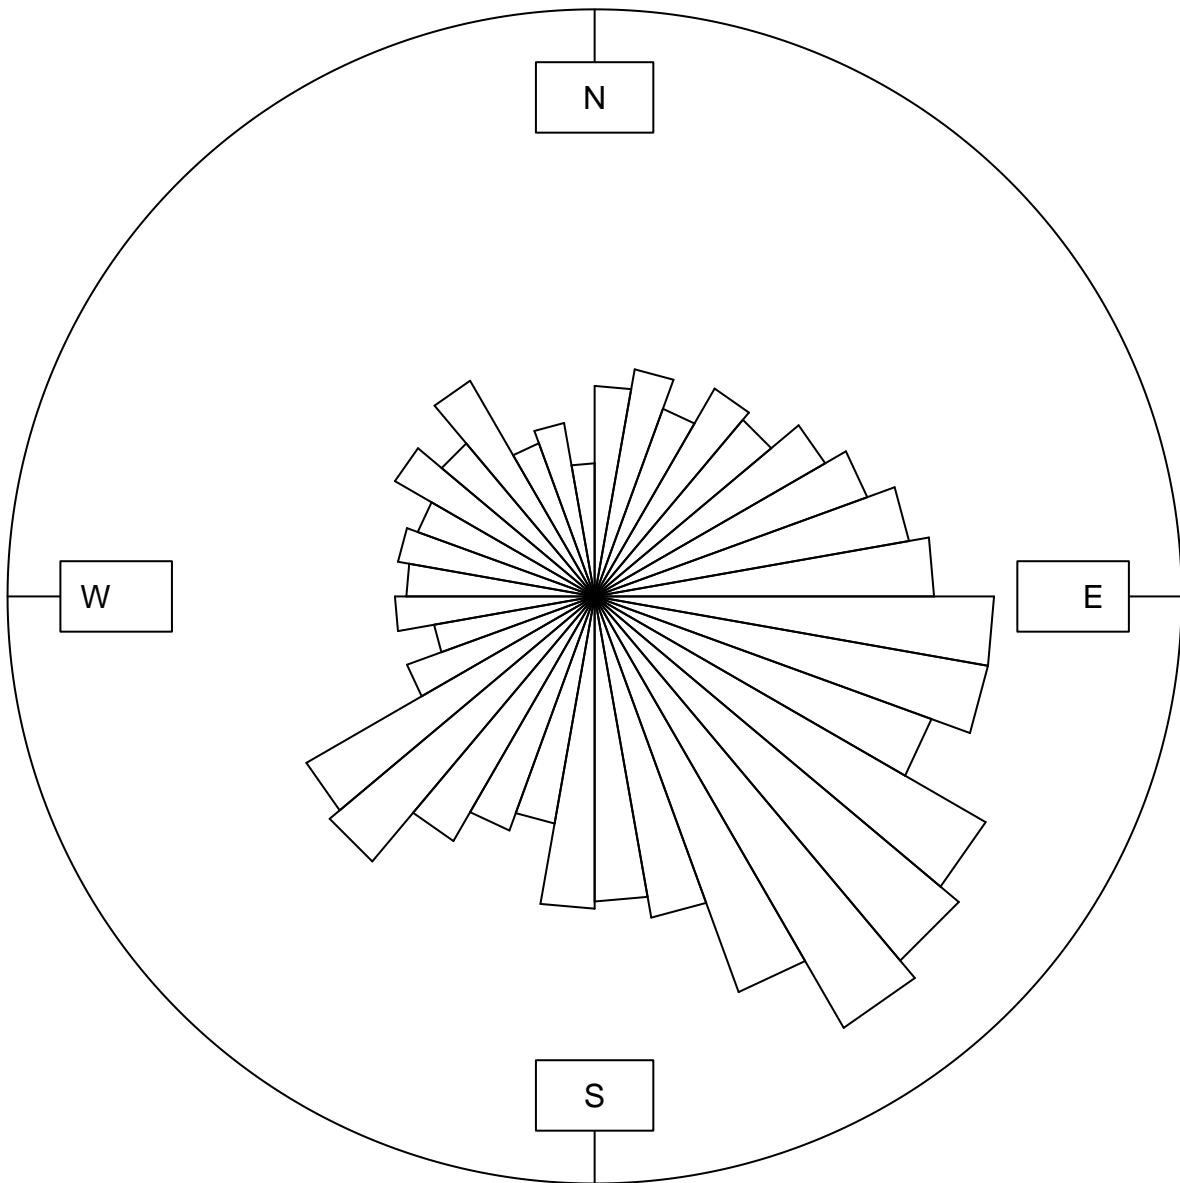

# bootstrap 834

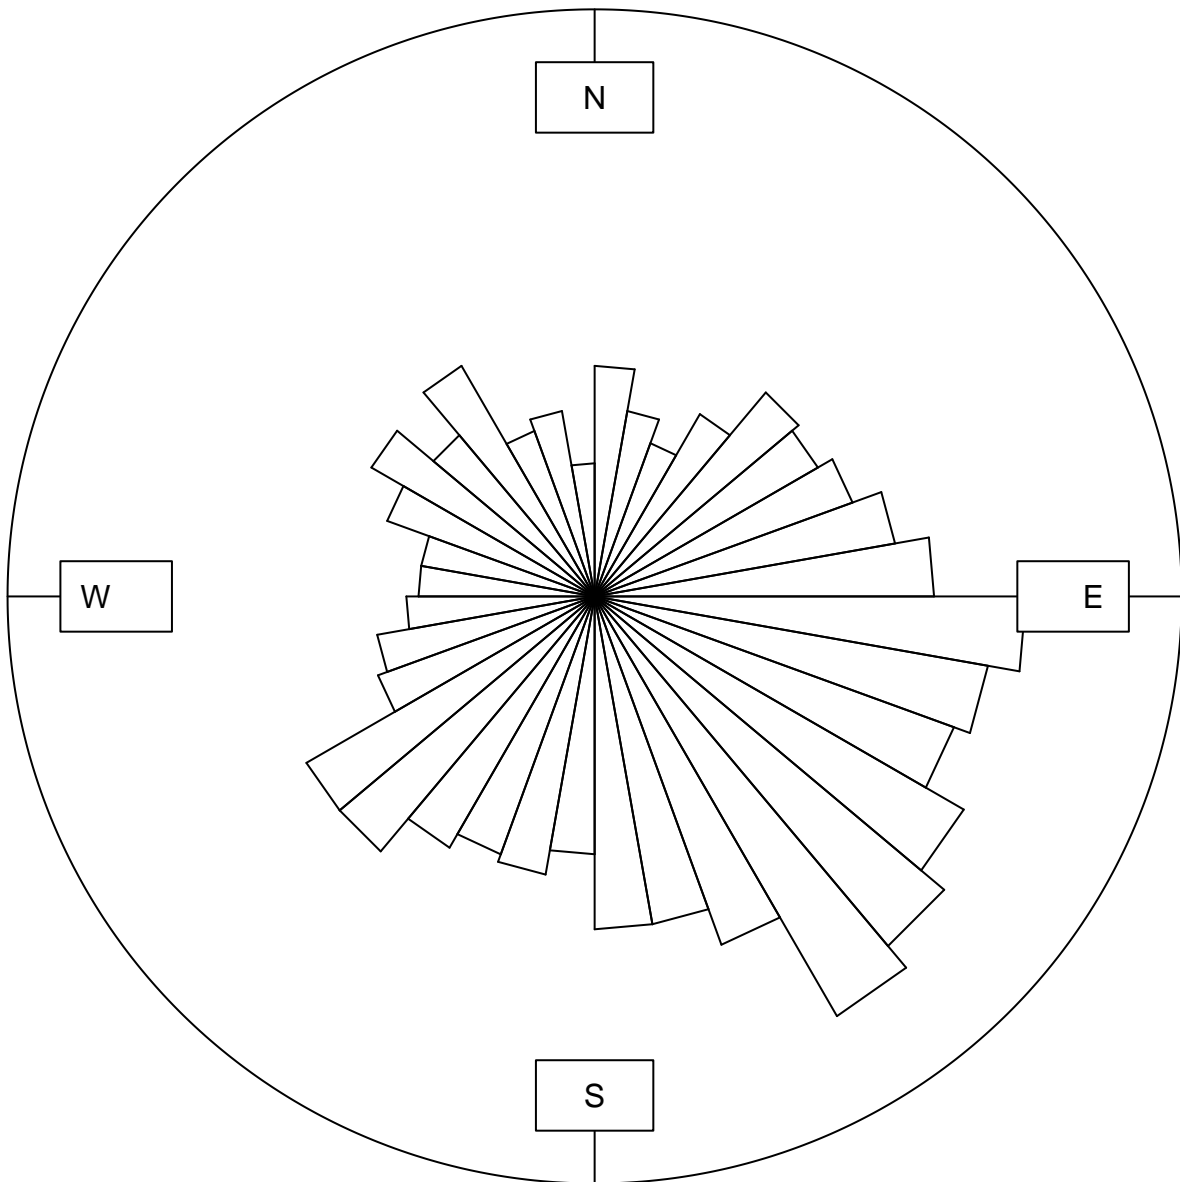

# bootstrap 835

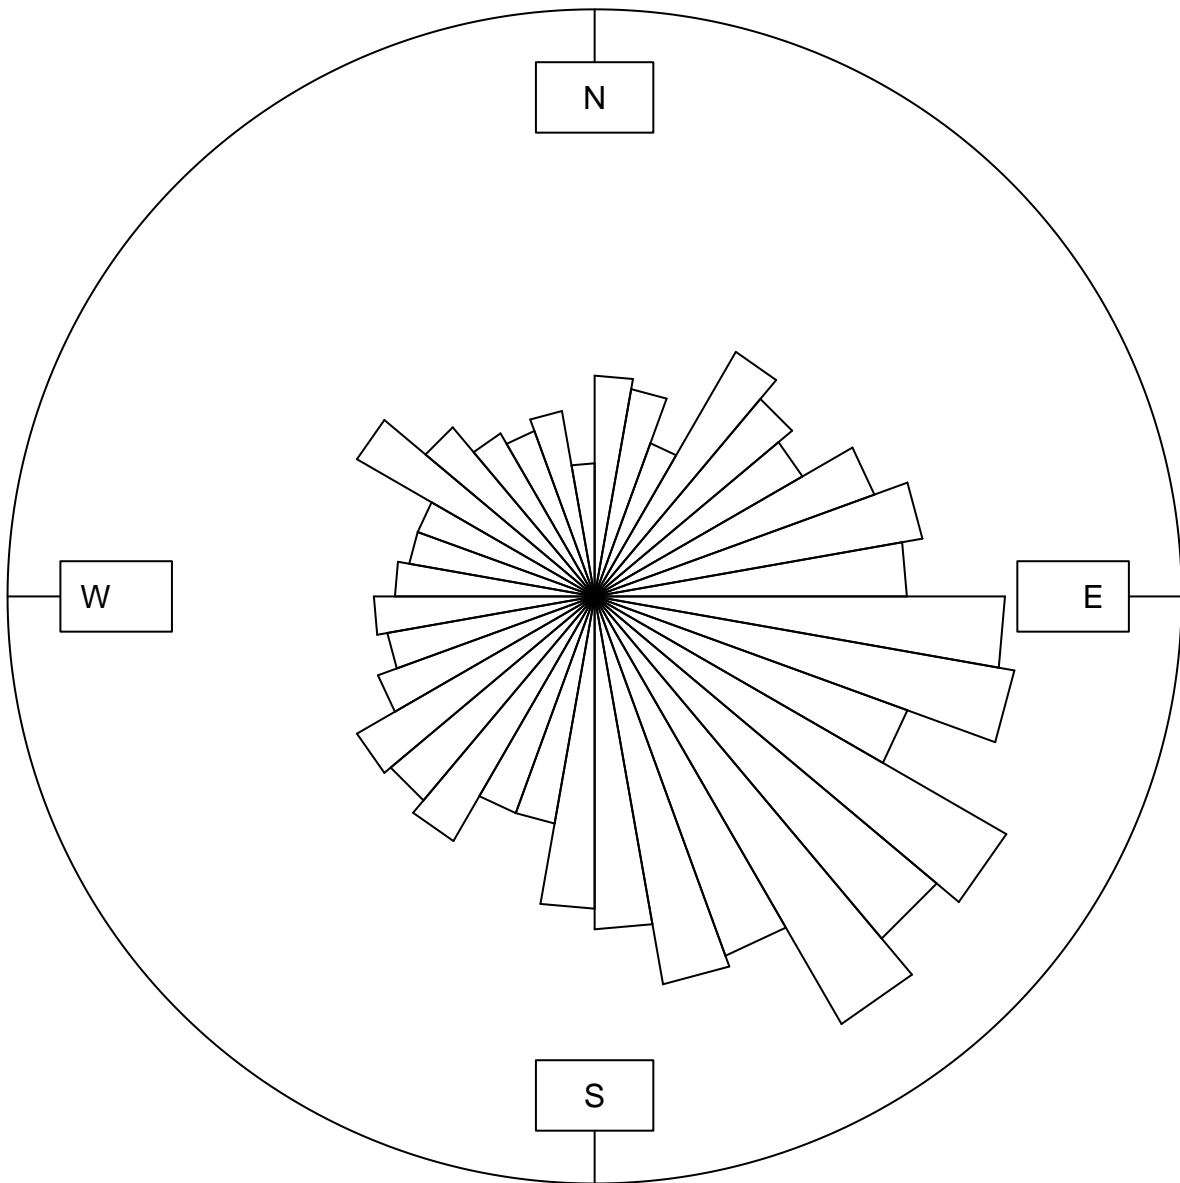

# bootstrap 836

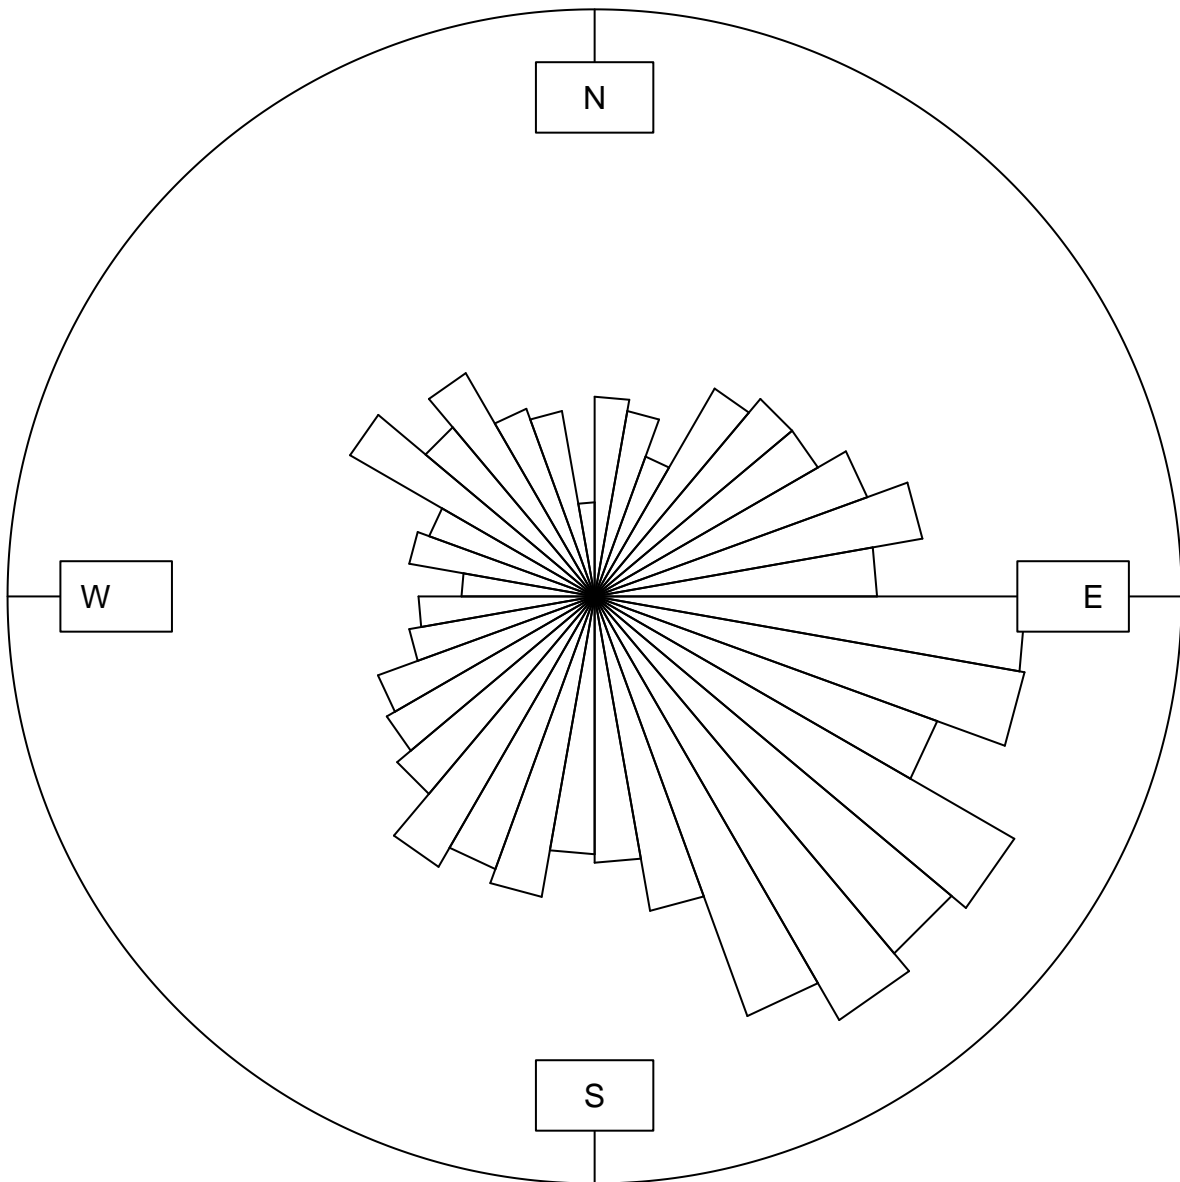

# bootstrap 837

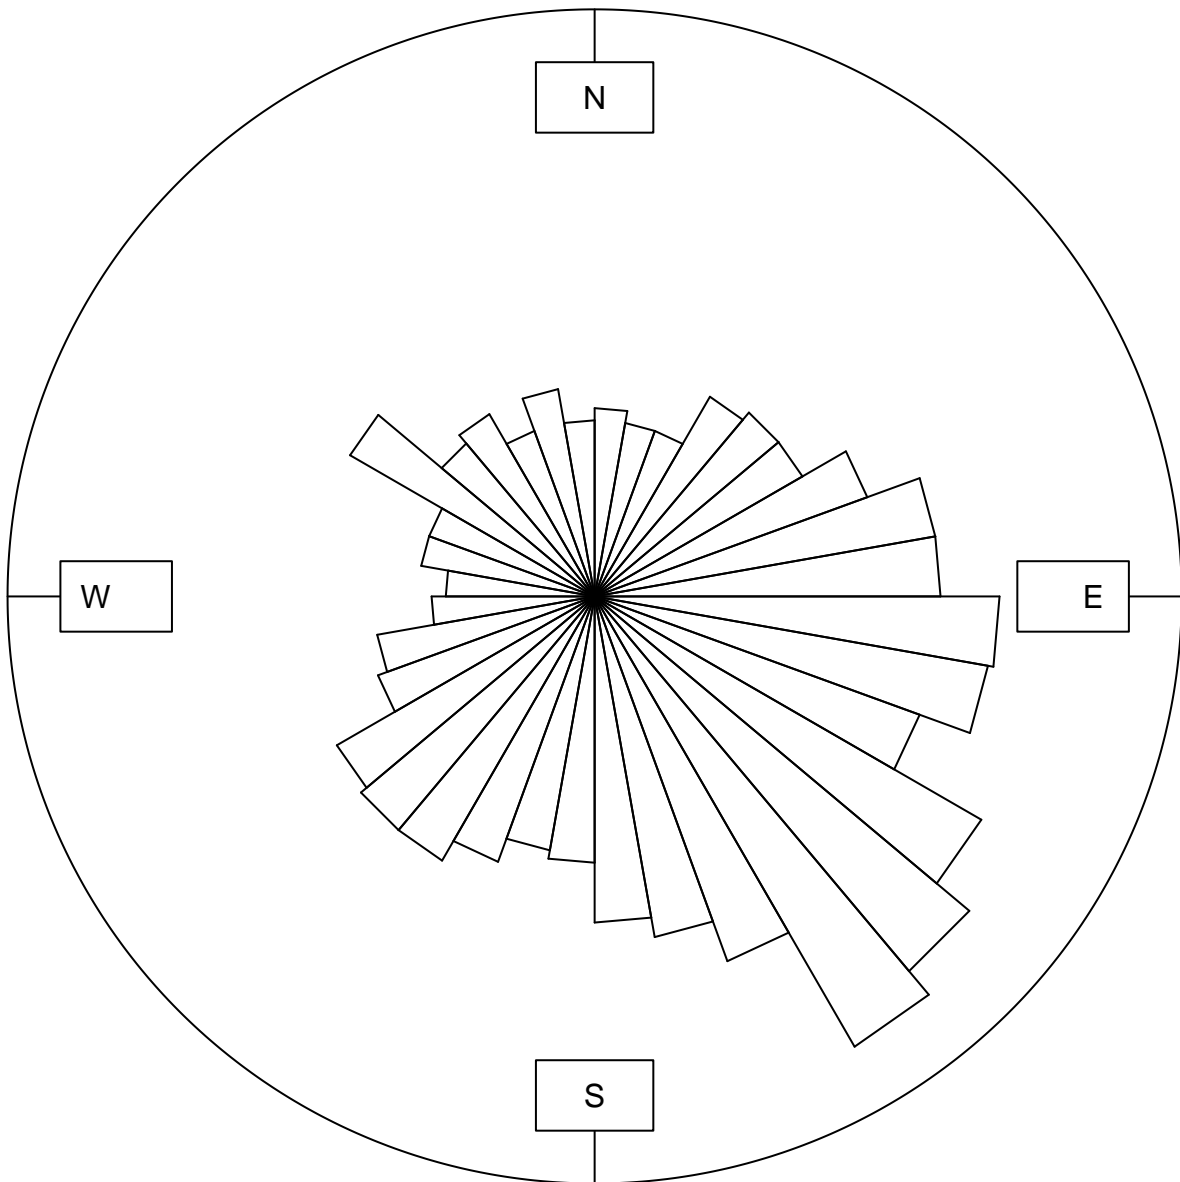

# bootstrap 838

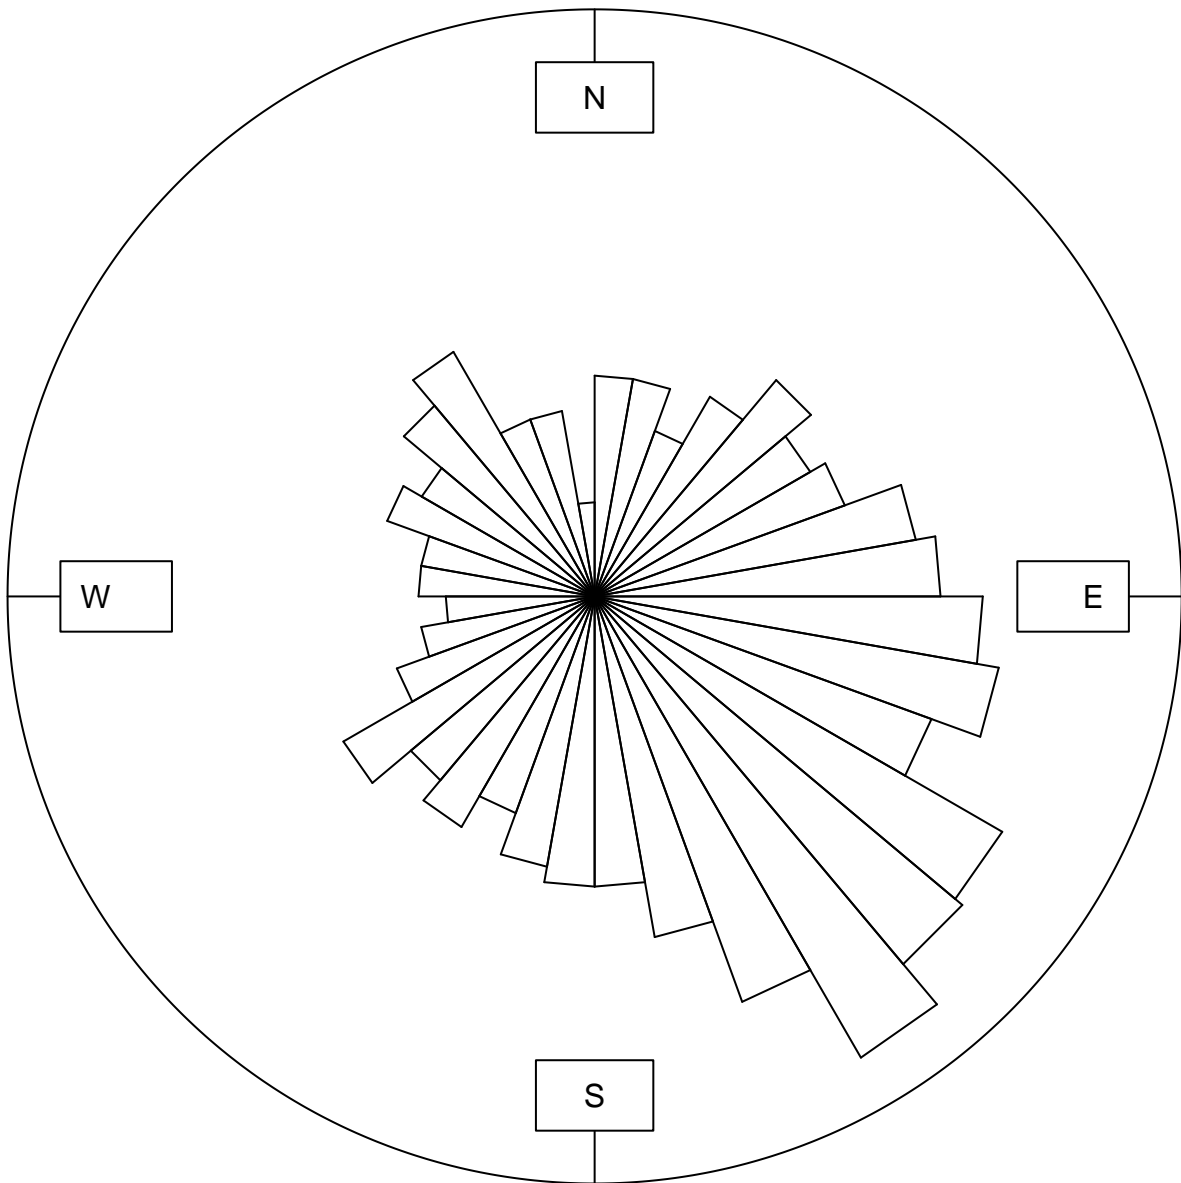

# bootstrap 839

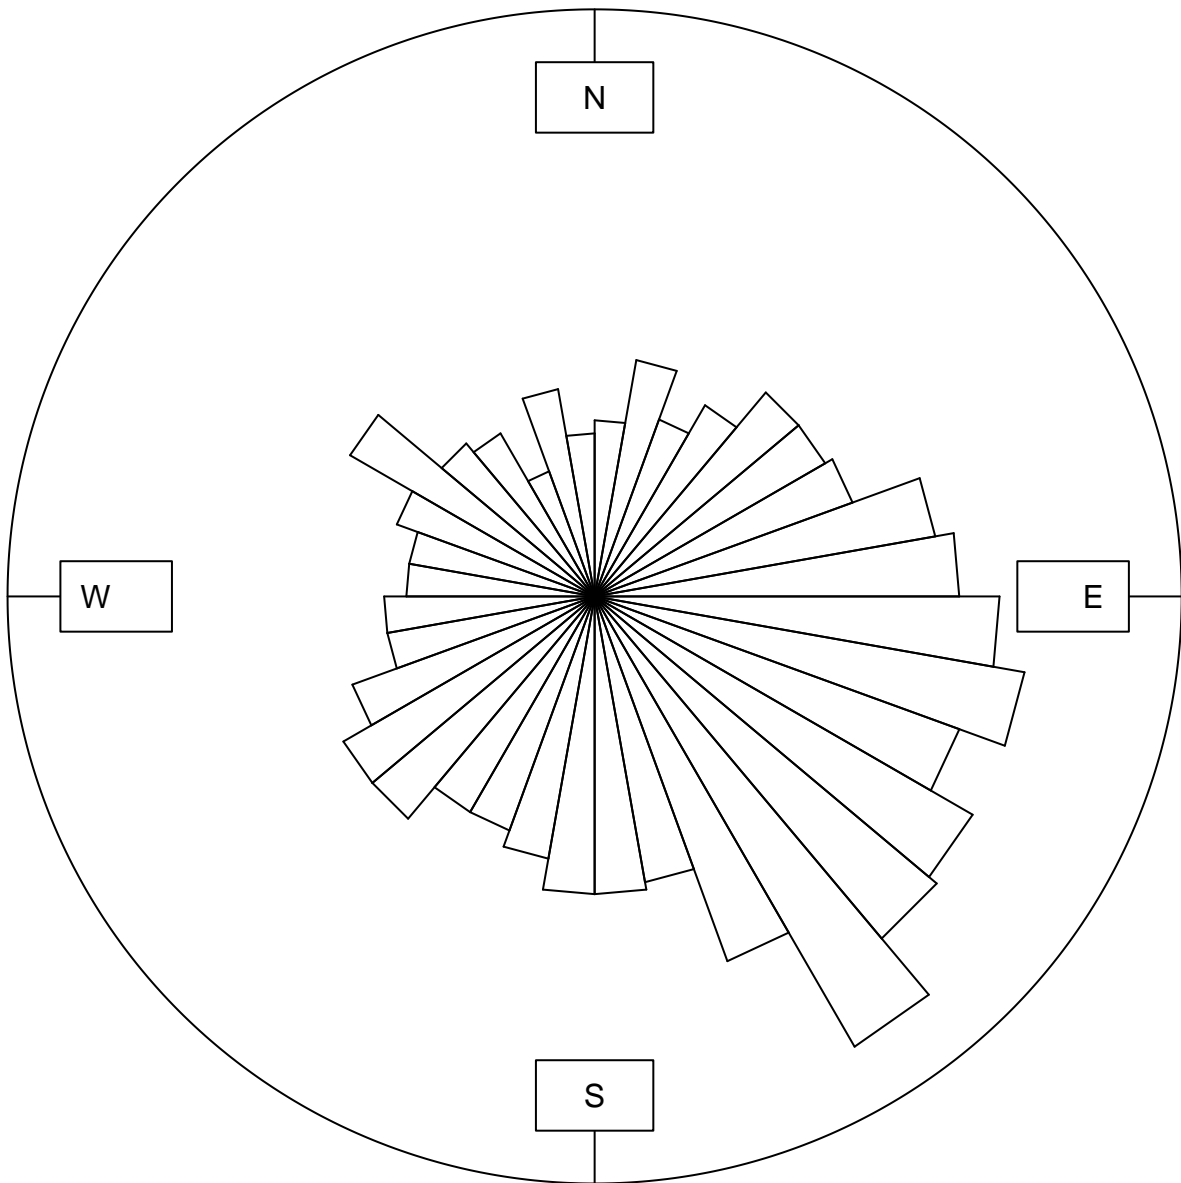

# bootstrap 840

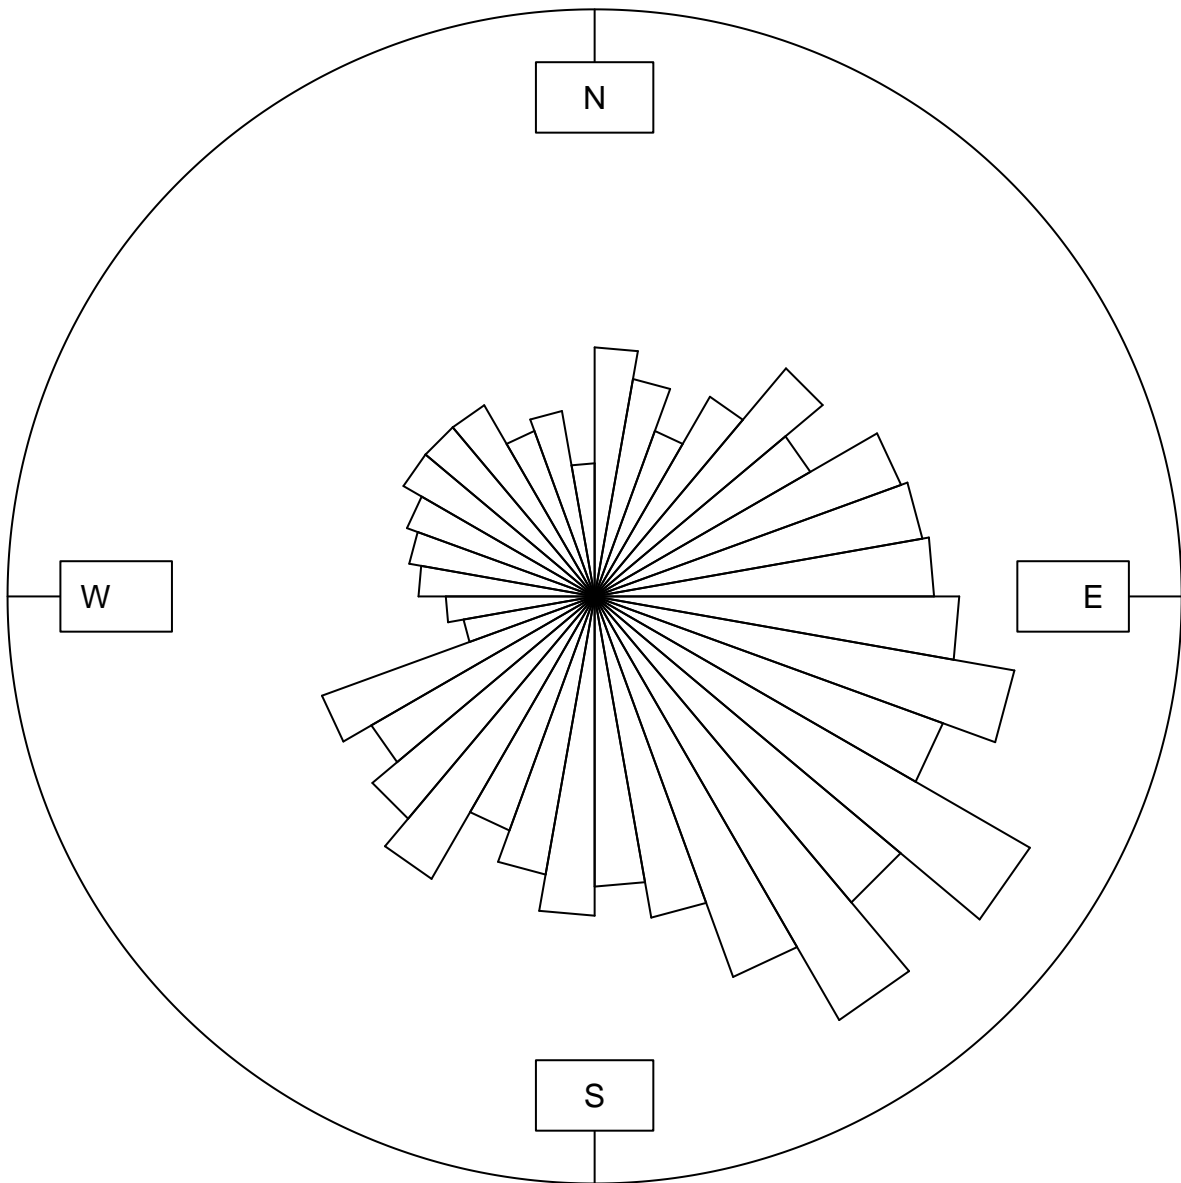



# bootstrap 841

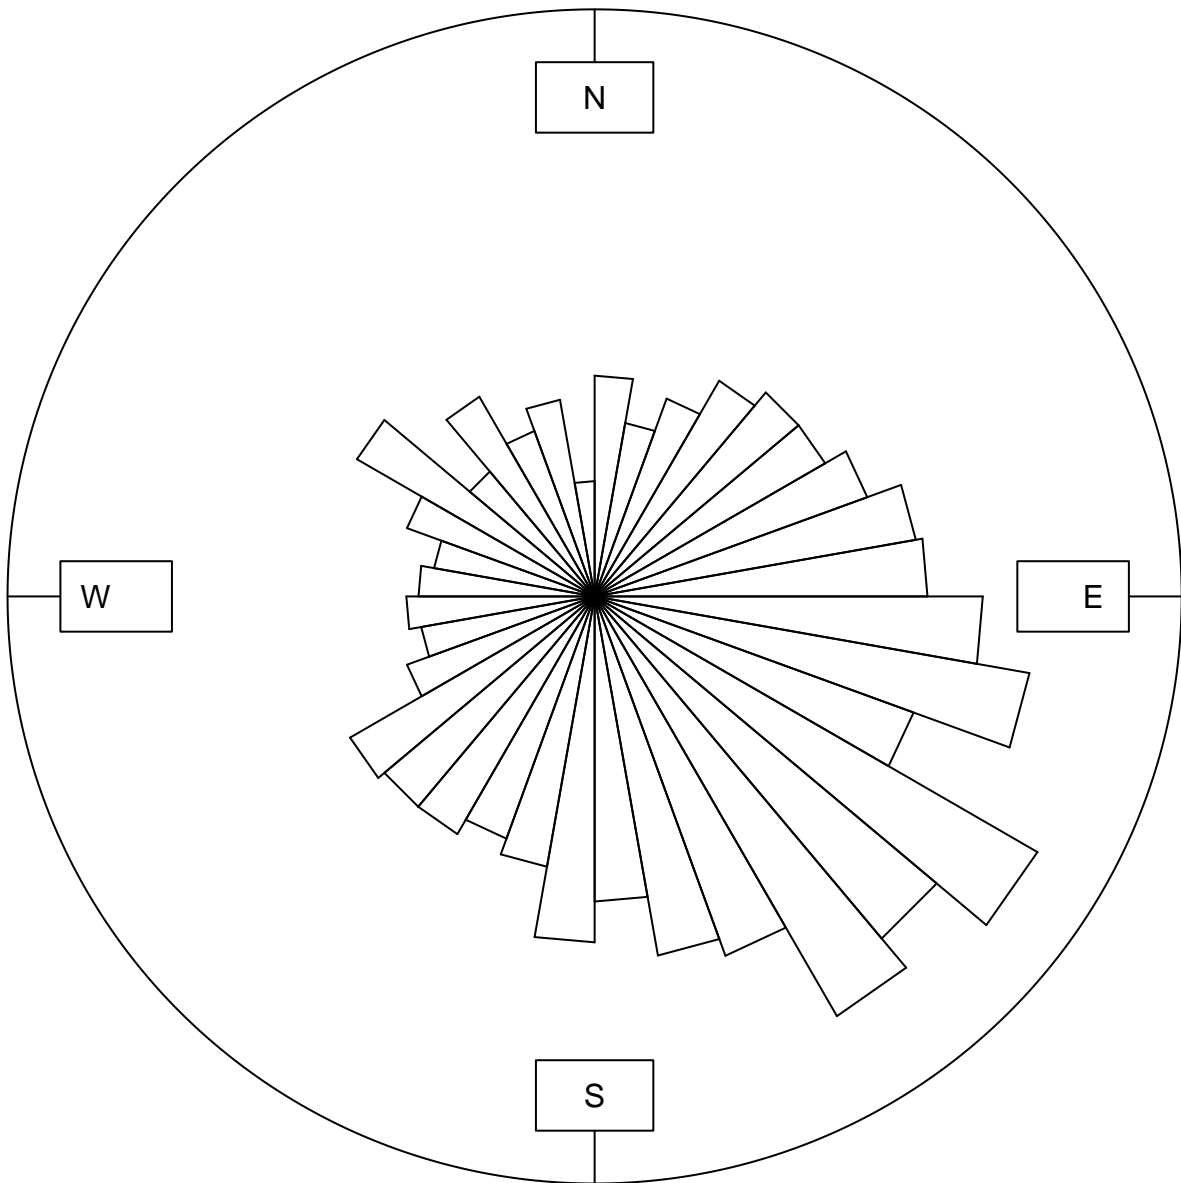

# bootstrap 842

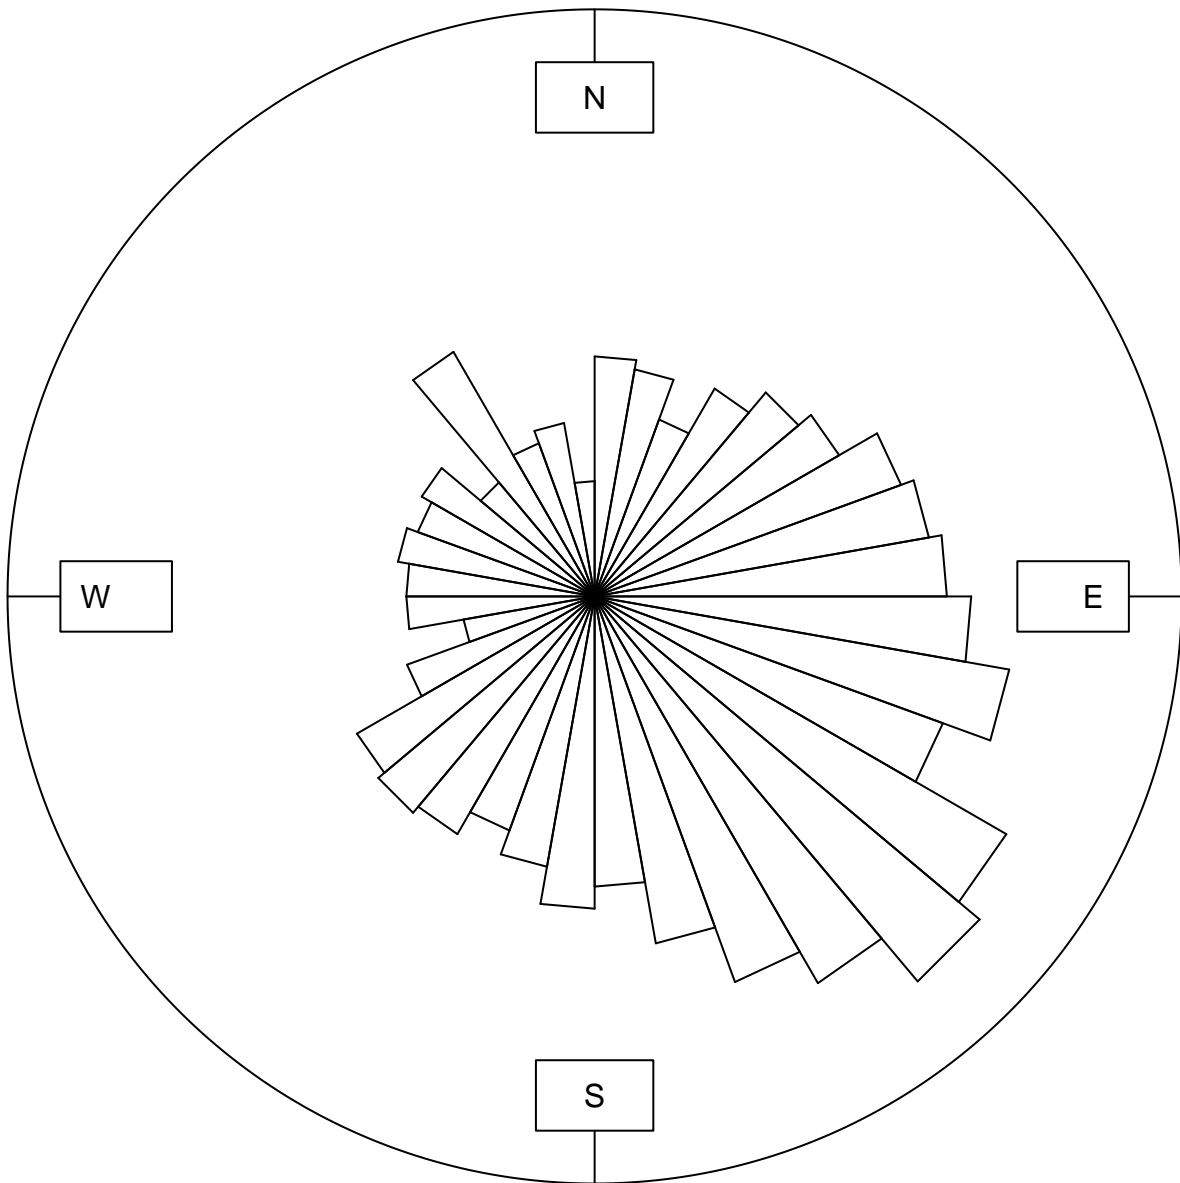

# bootstrap 843

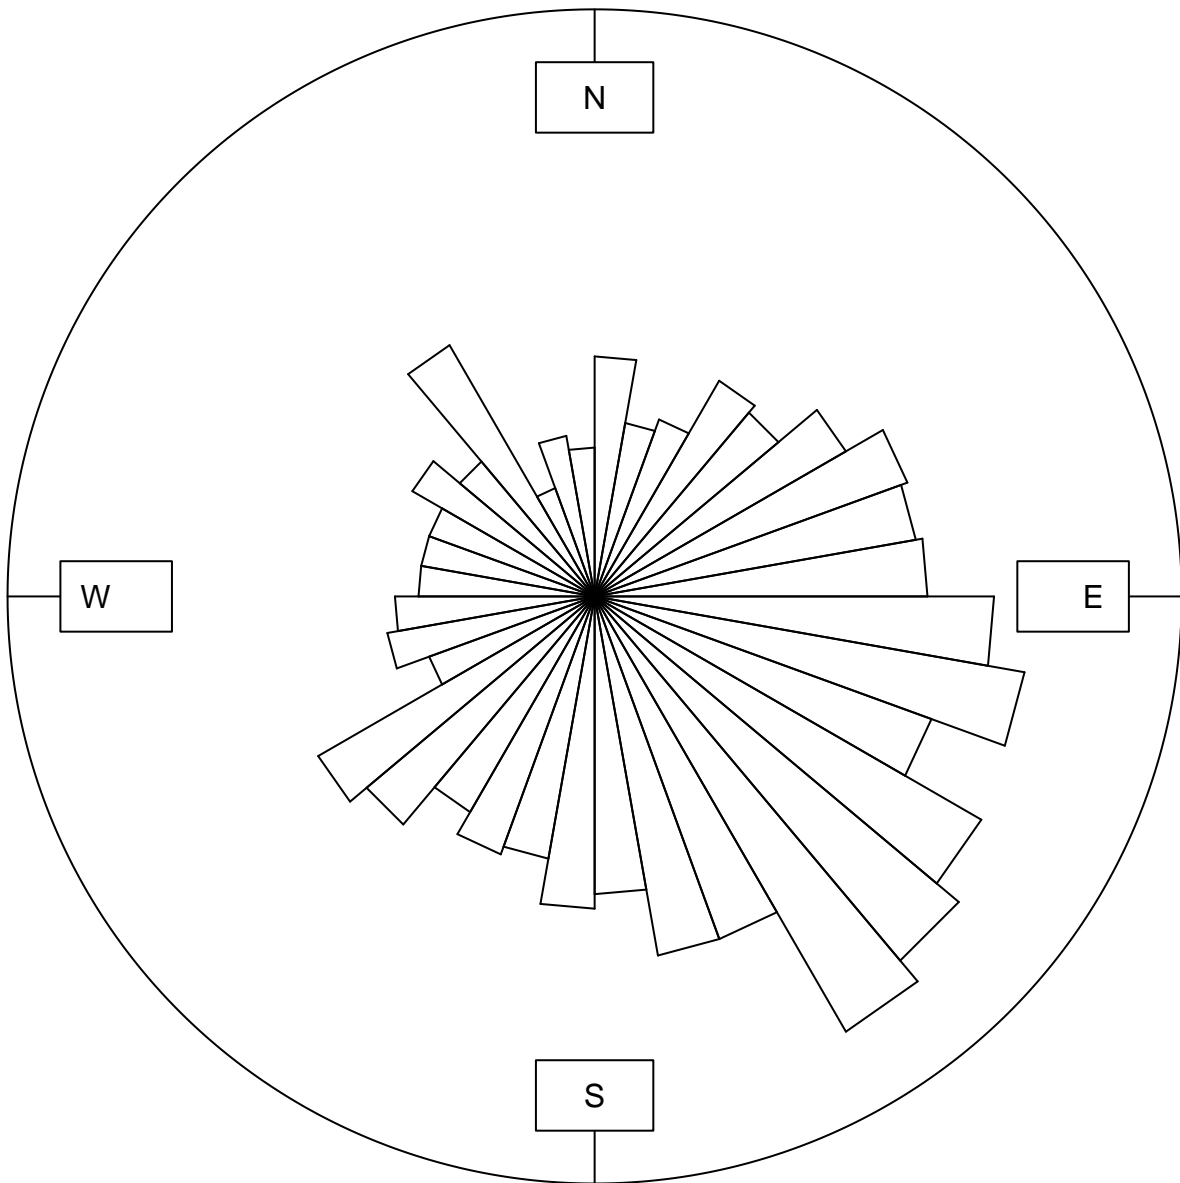

# bootstrap 844

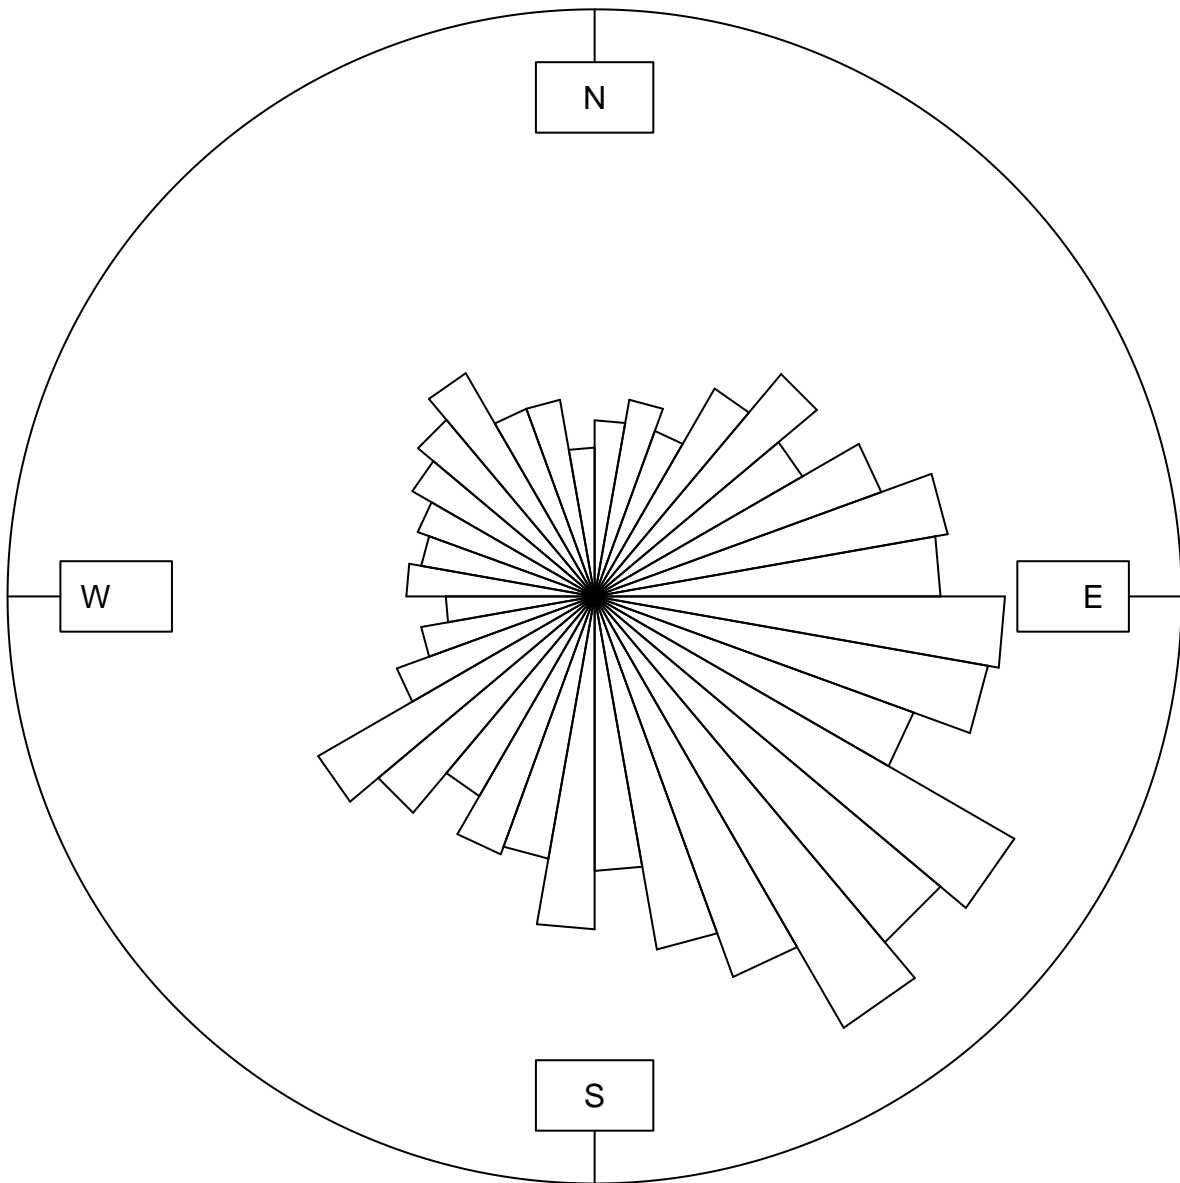

# bootstrap 845

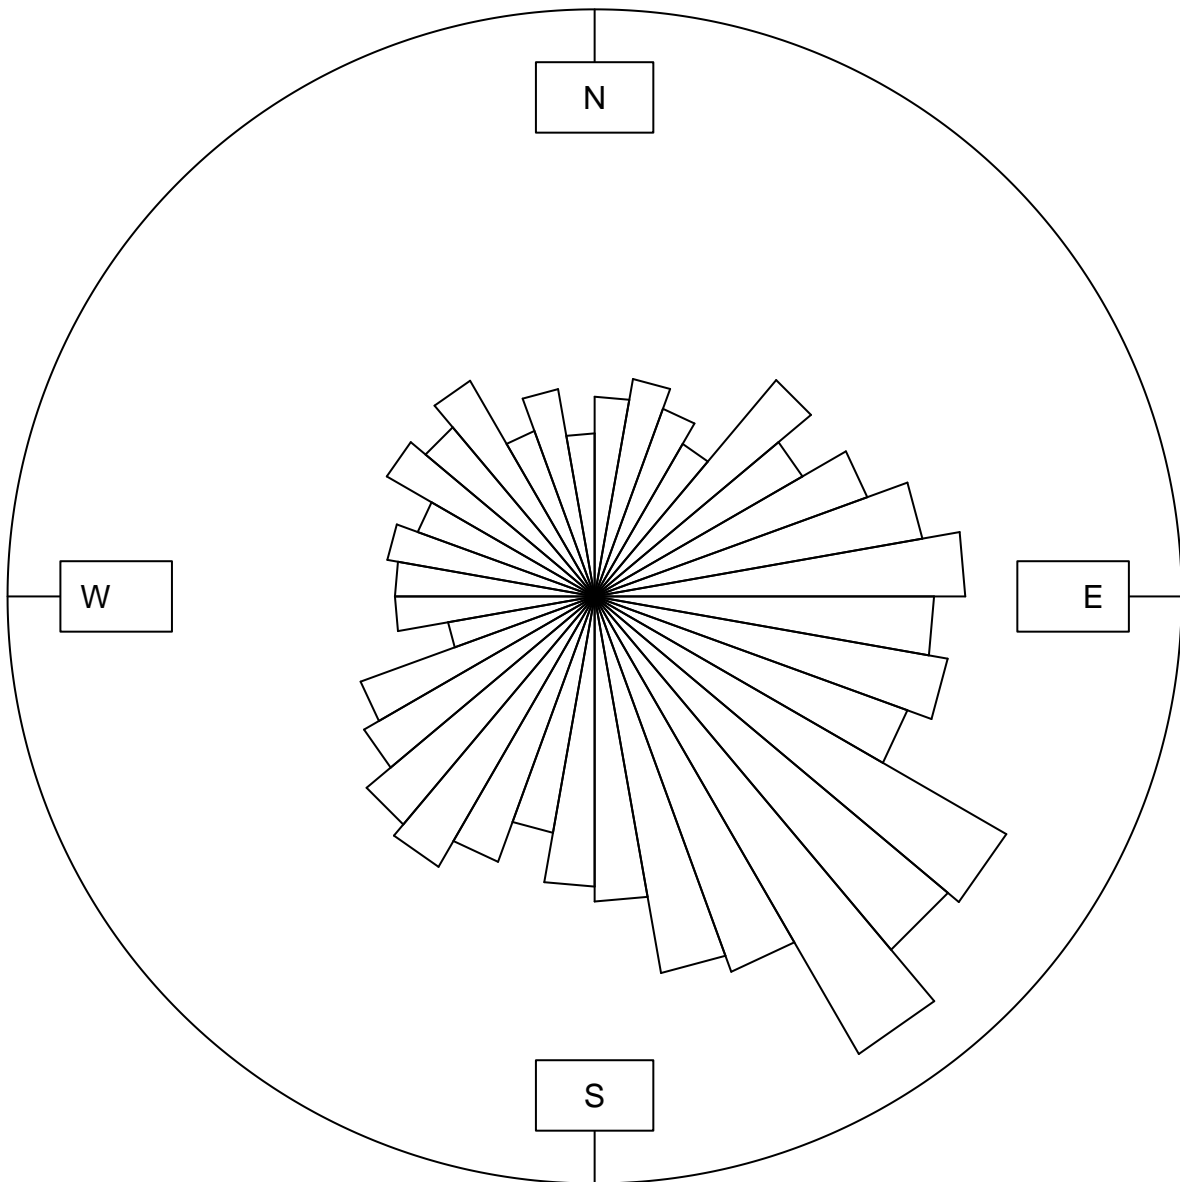

# bootstrap 846

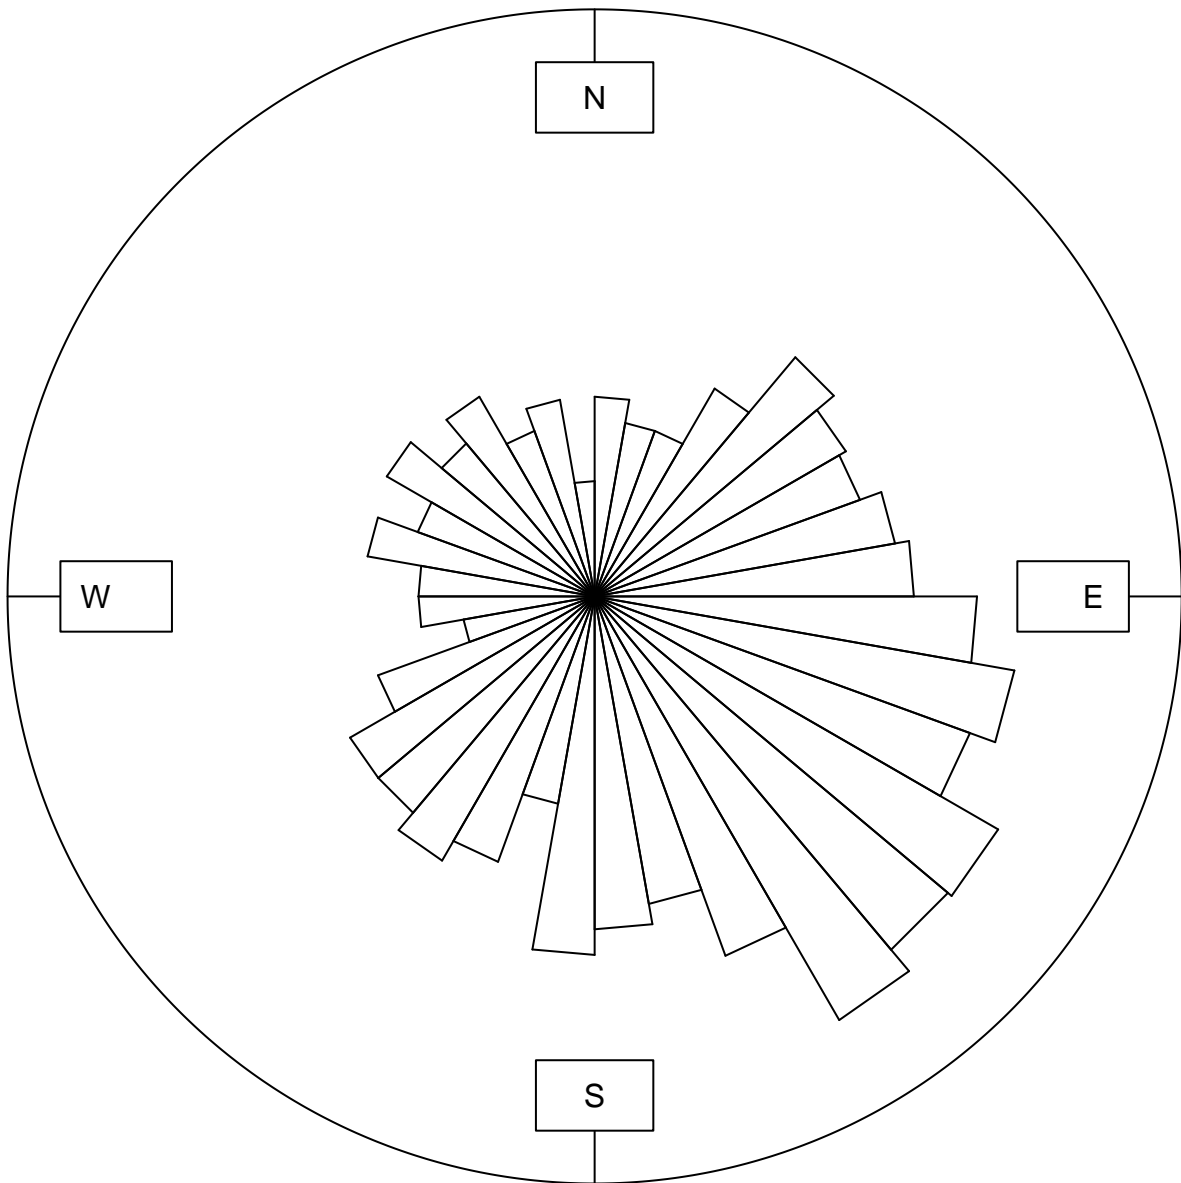

# bootstrap 847

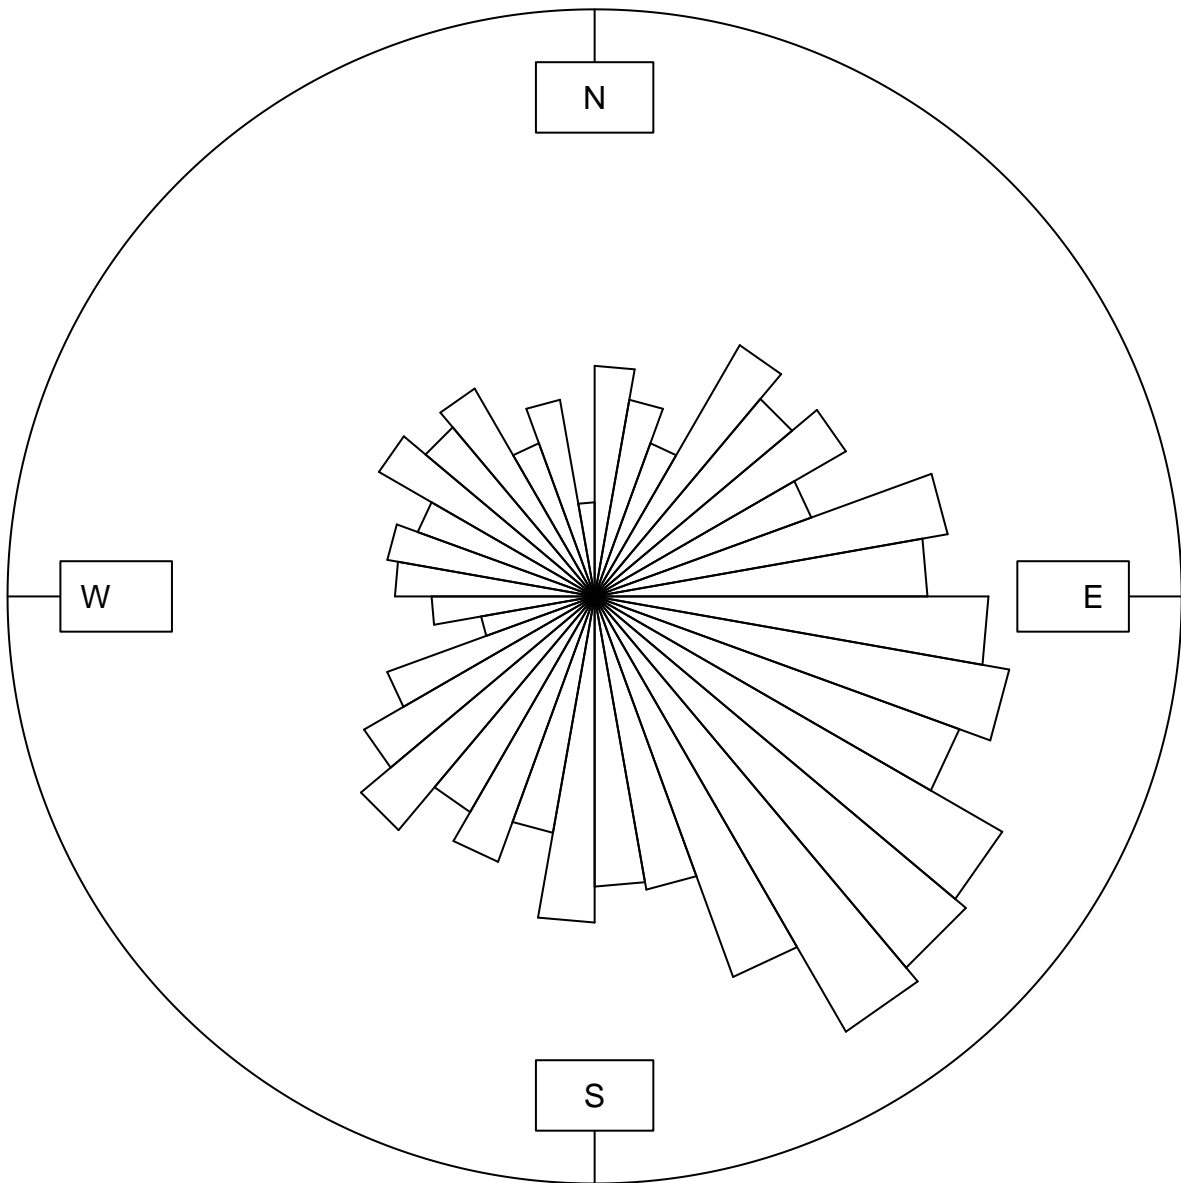

# bootstrap 848

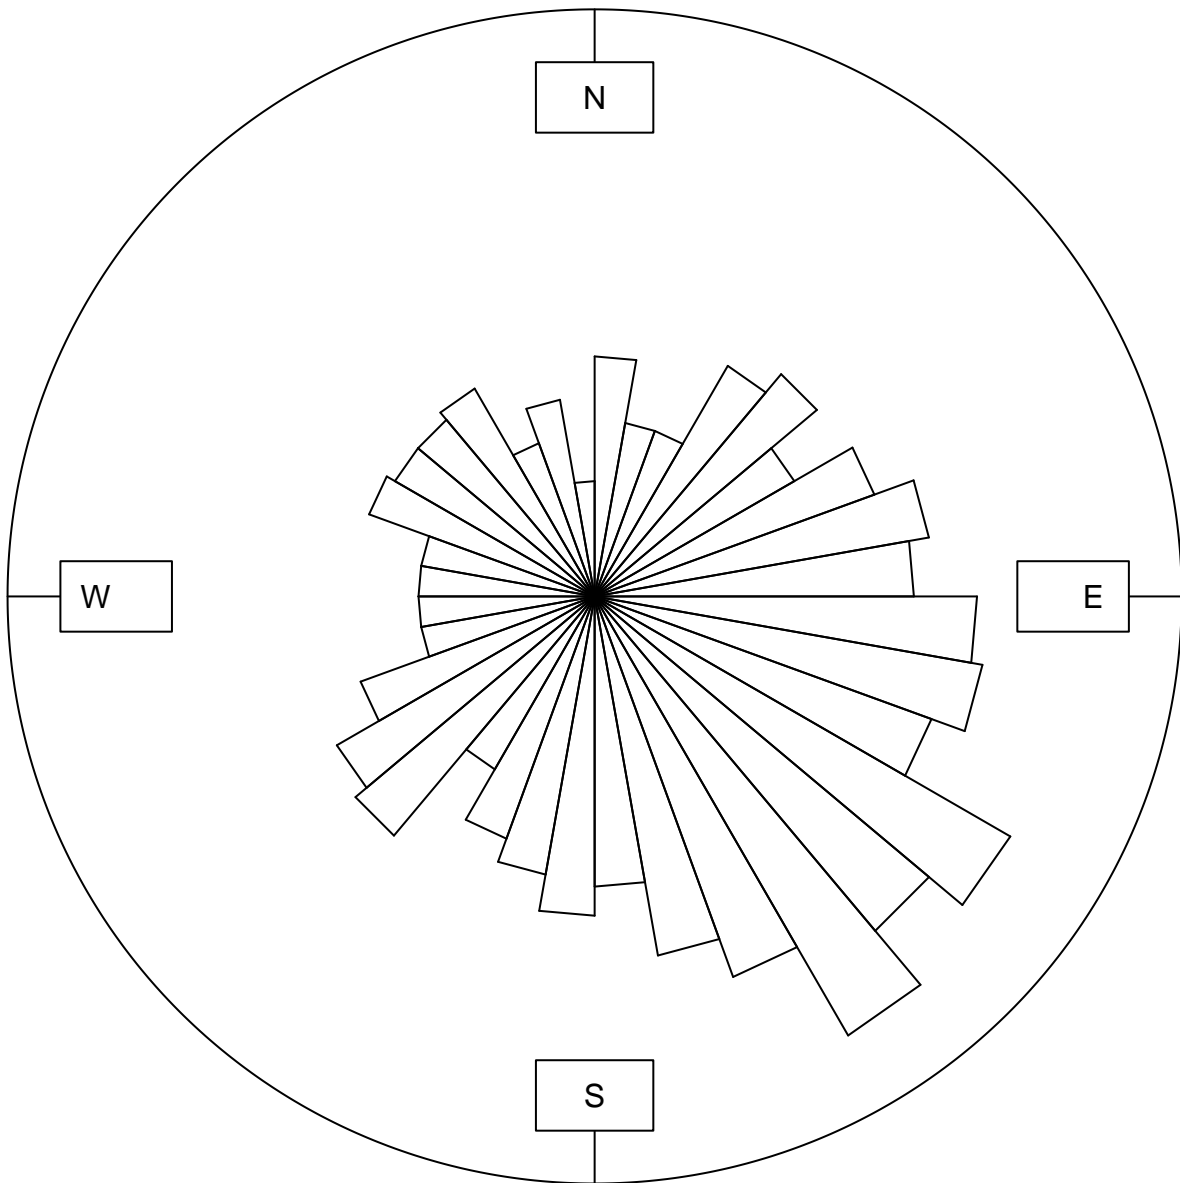



# bootstrap 849

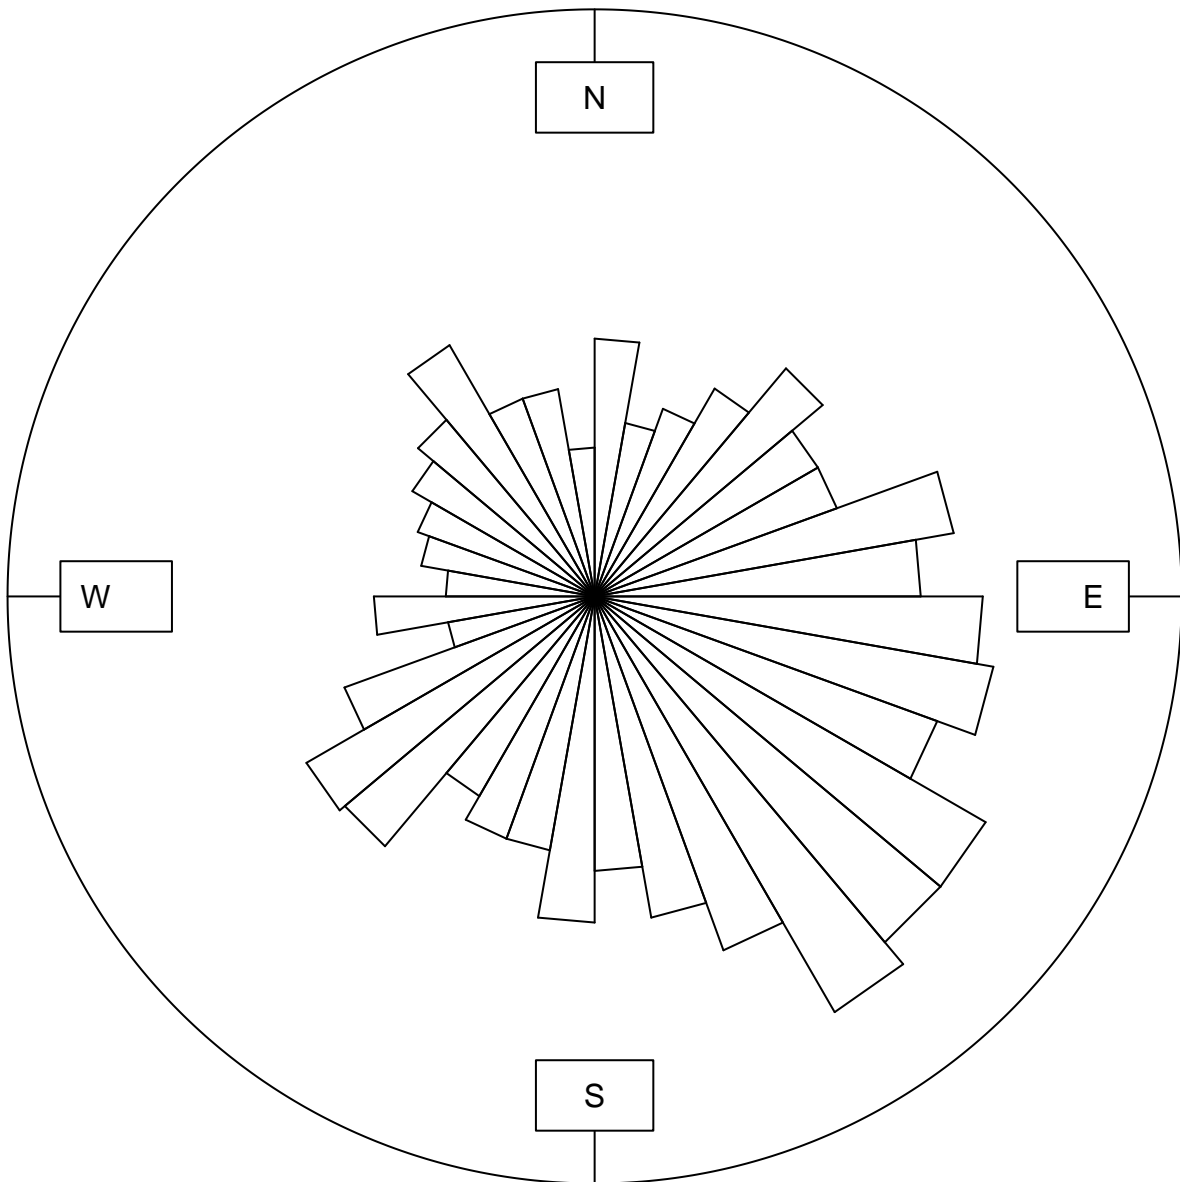

# bootstrap 850

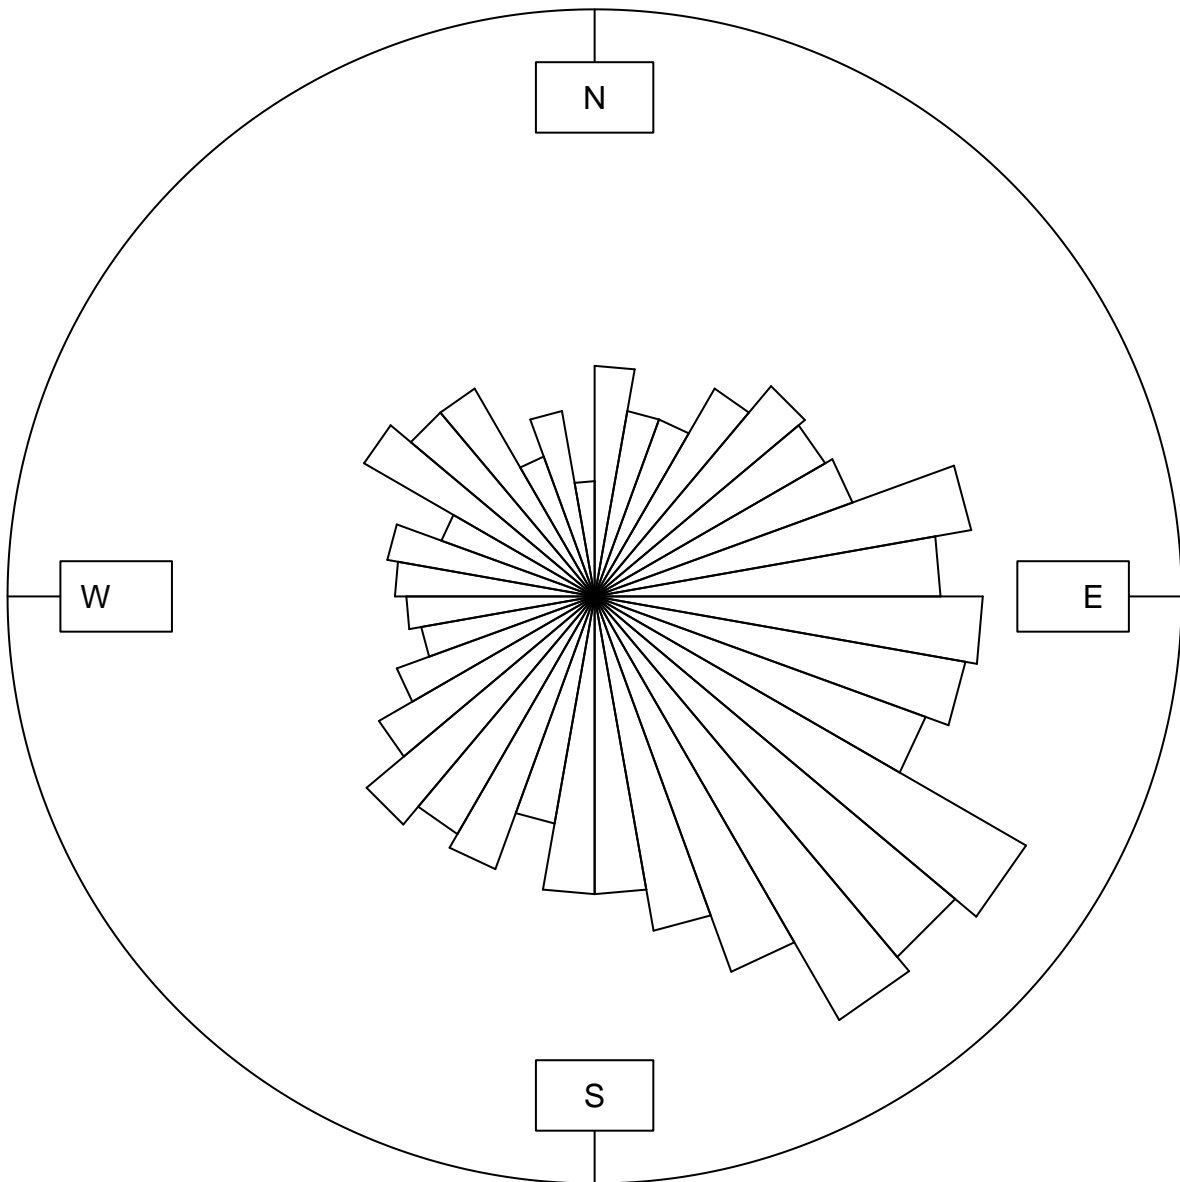

# bootstrap 851

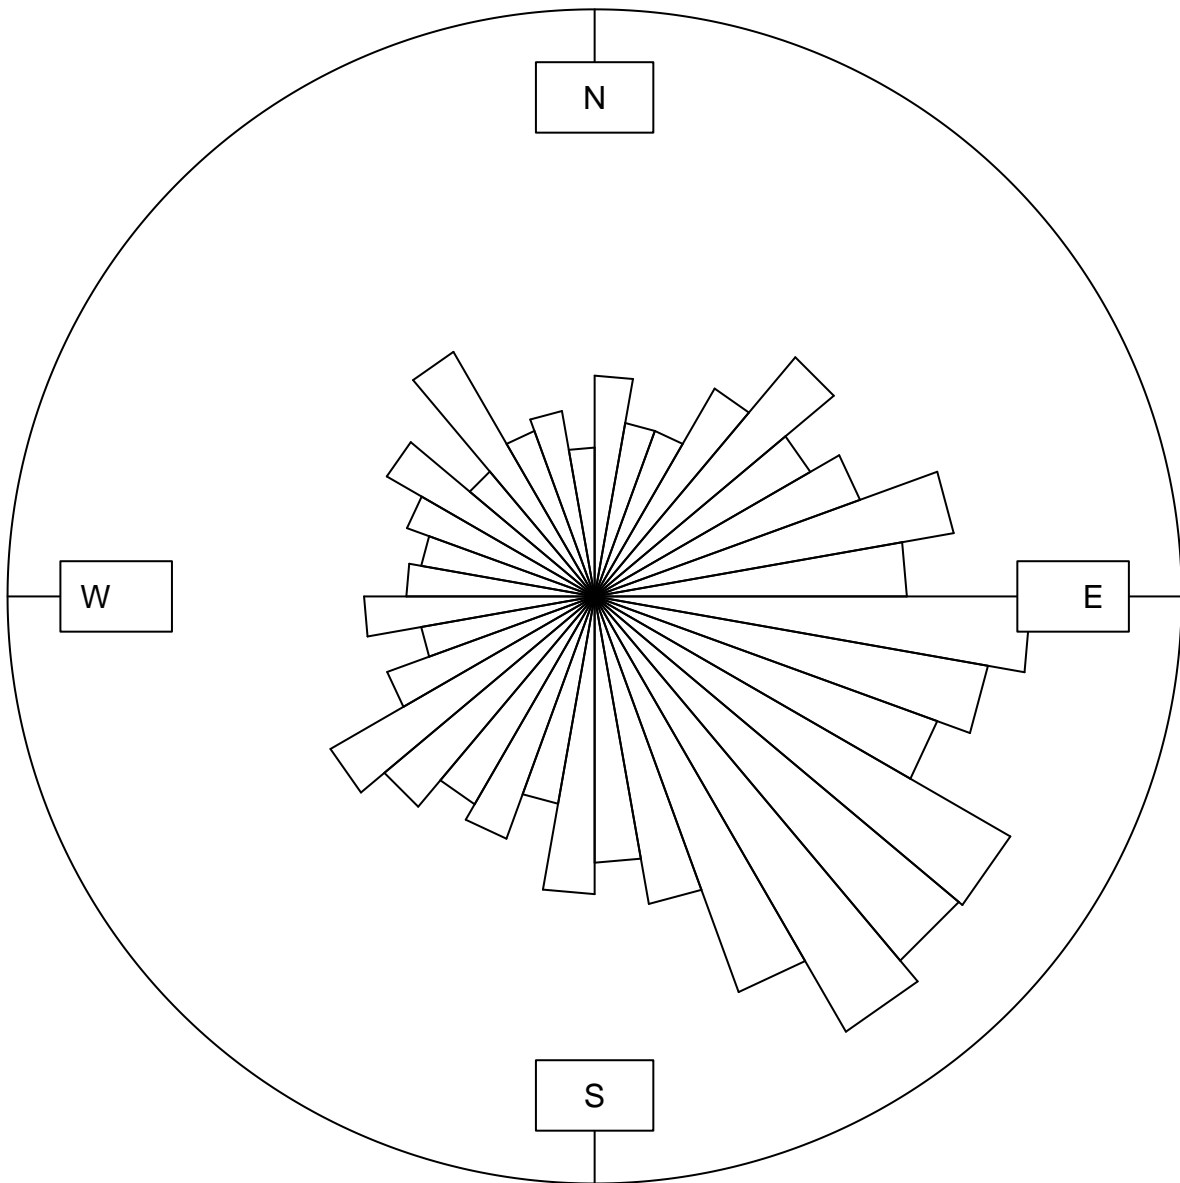

# bootstrap 852

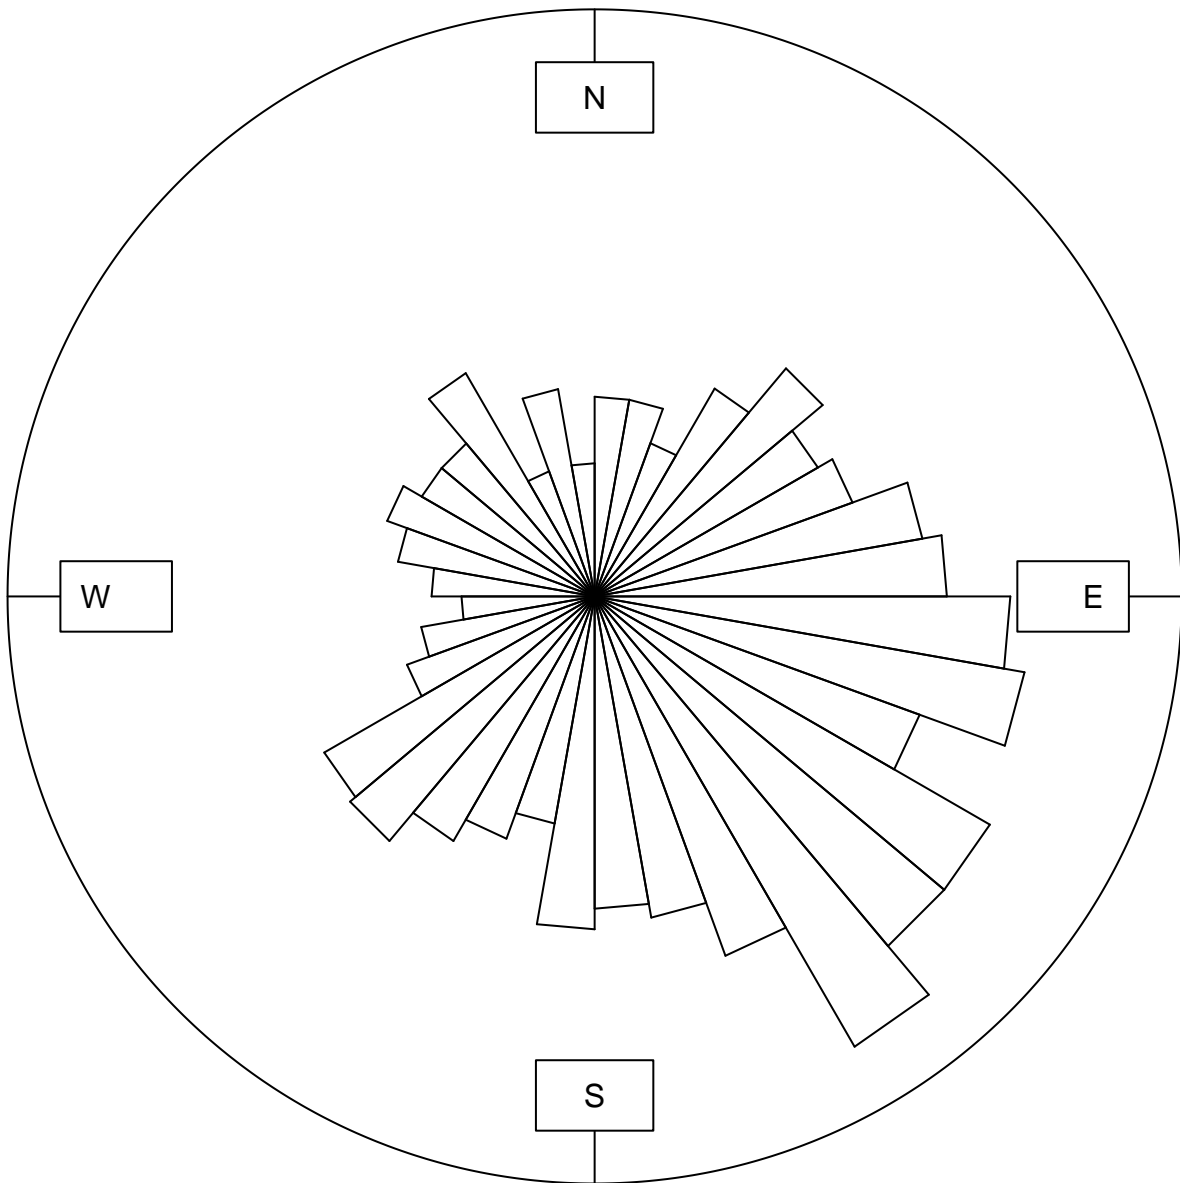

# bootstrap 853

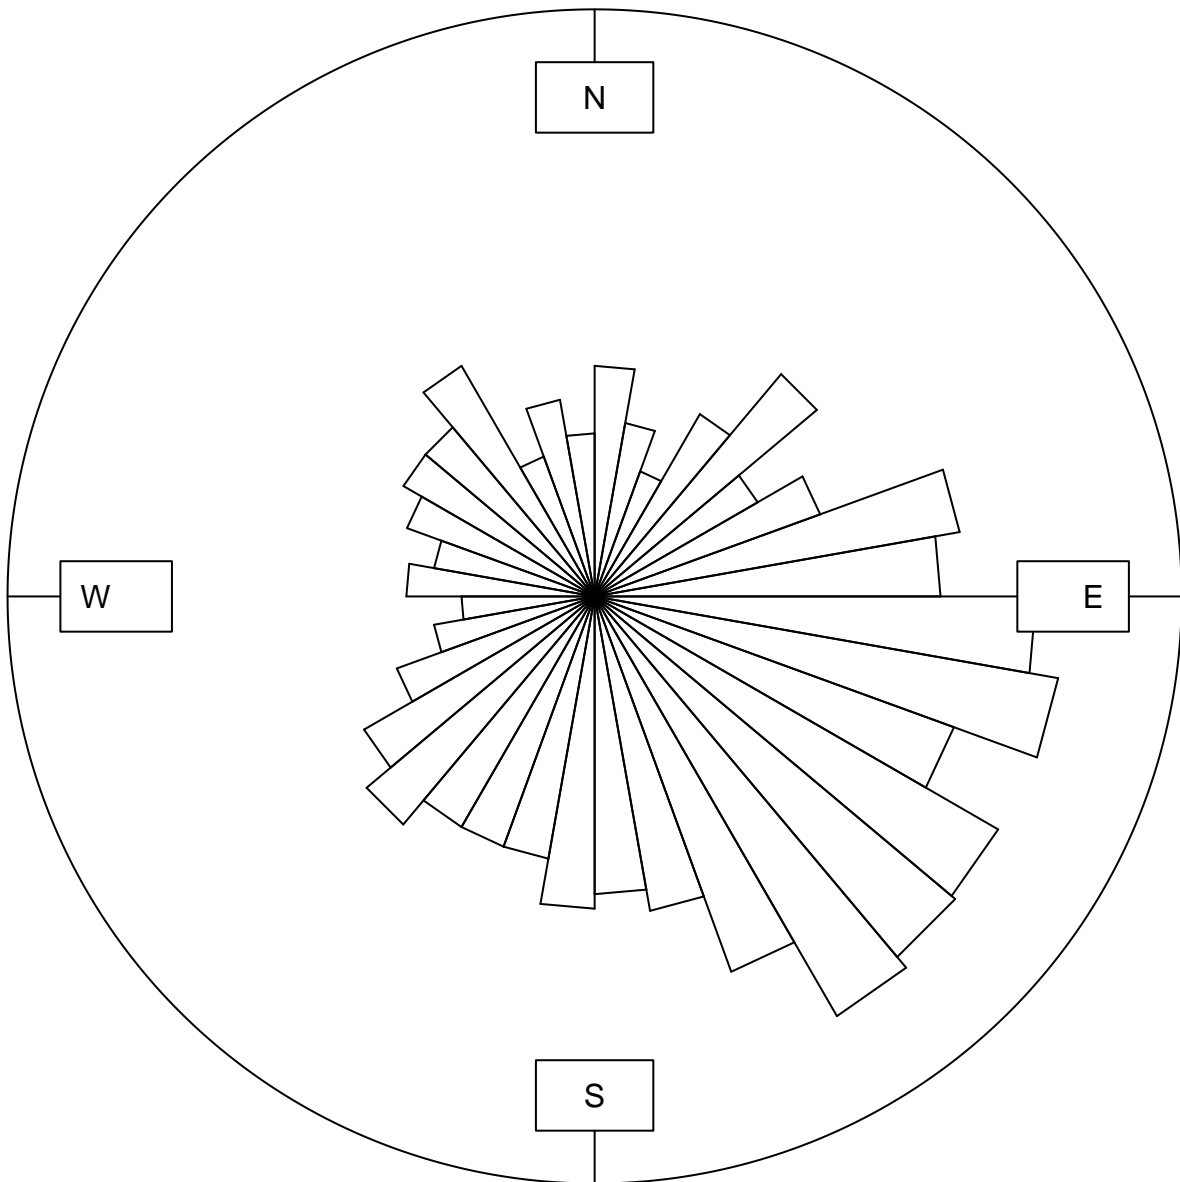

# bootstrap 854

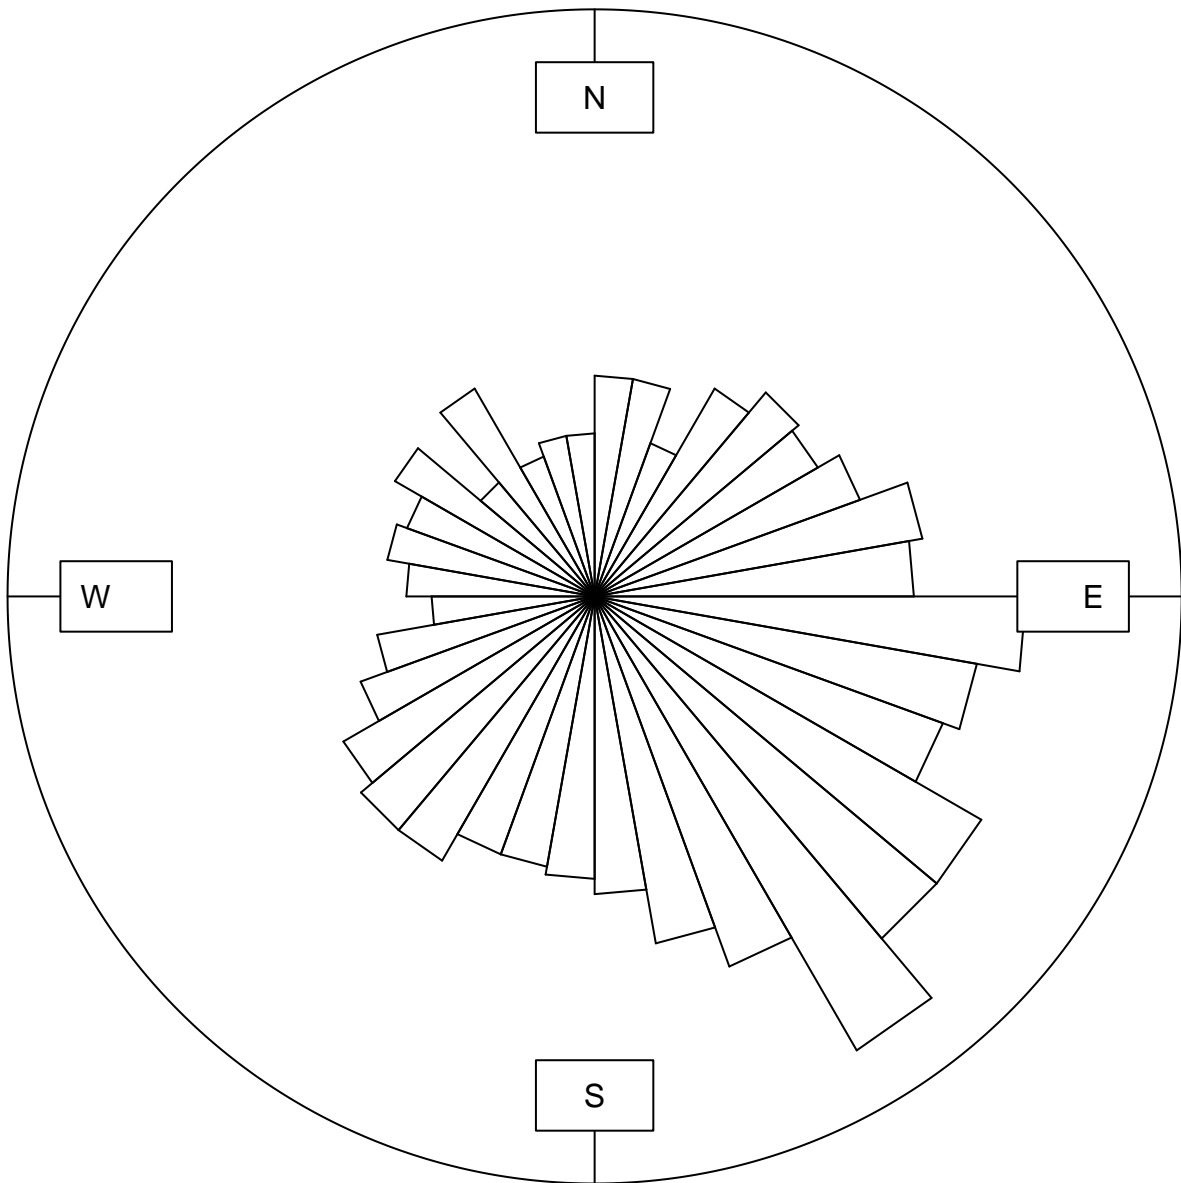

# bootstrap 855

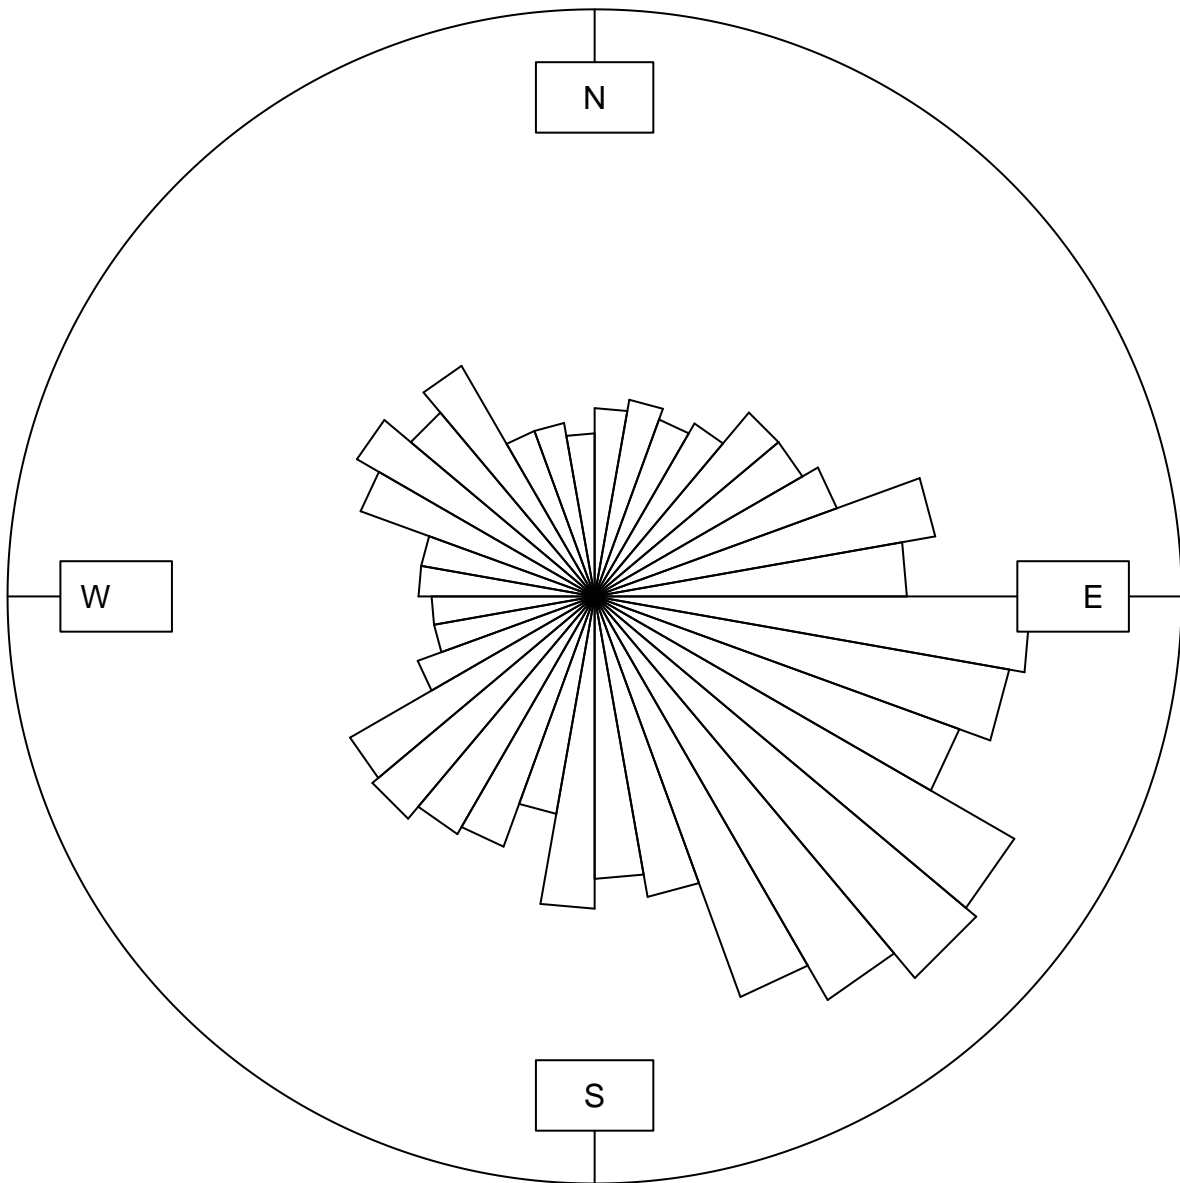

# bootstrap 856

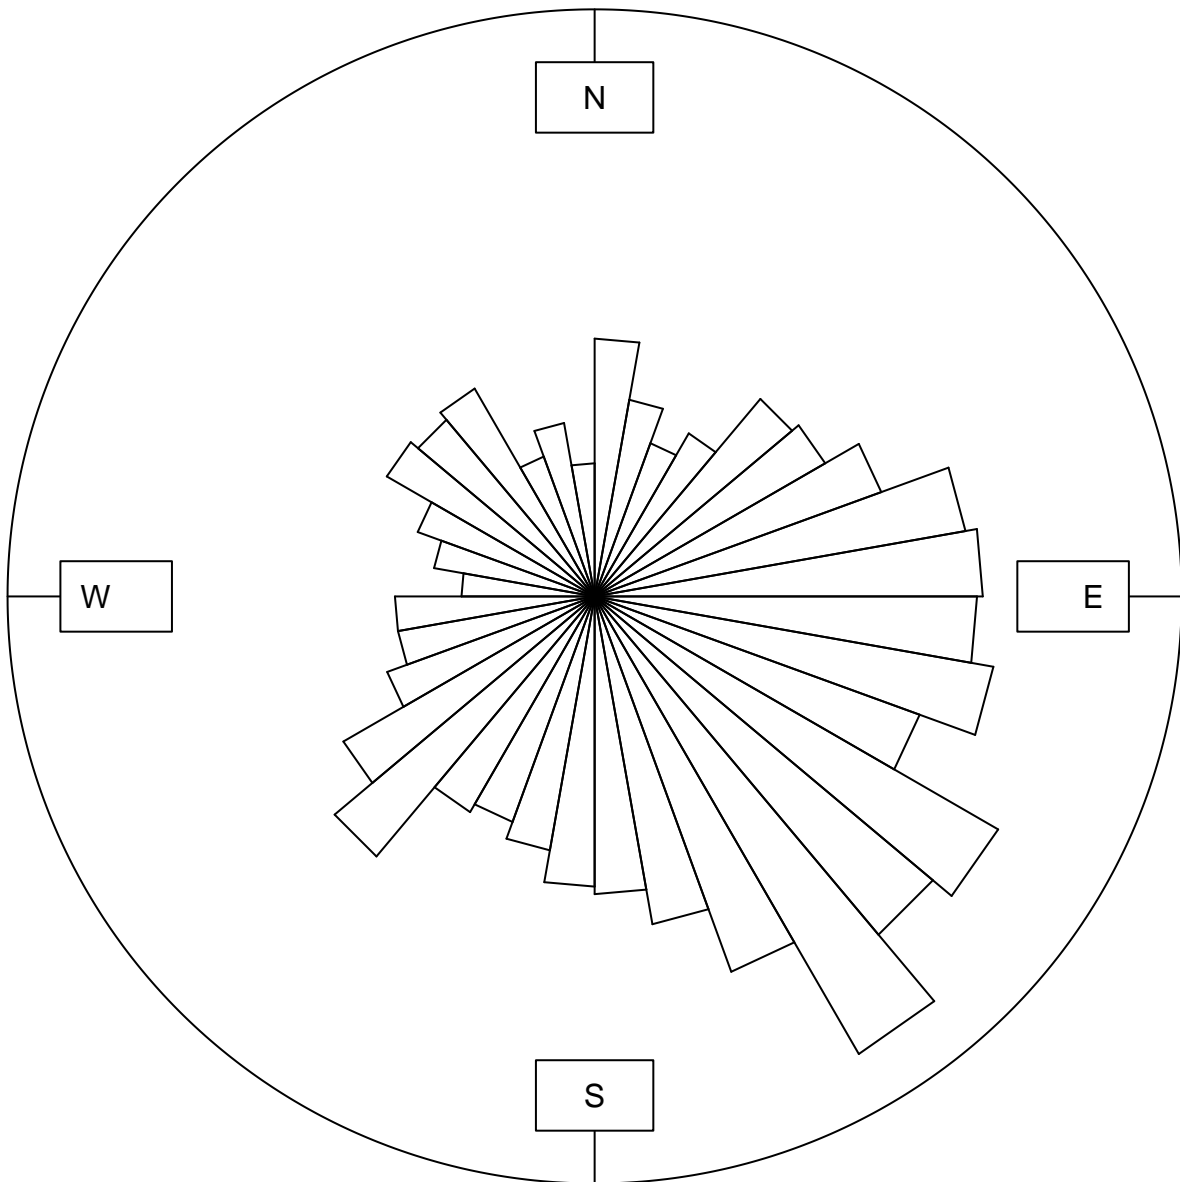



**bootstrap 857**

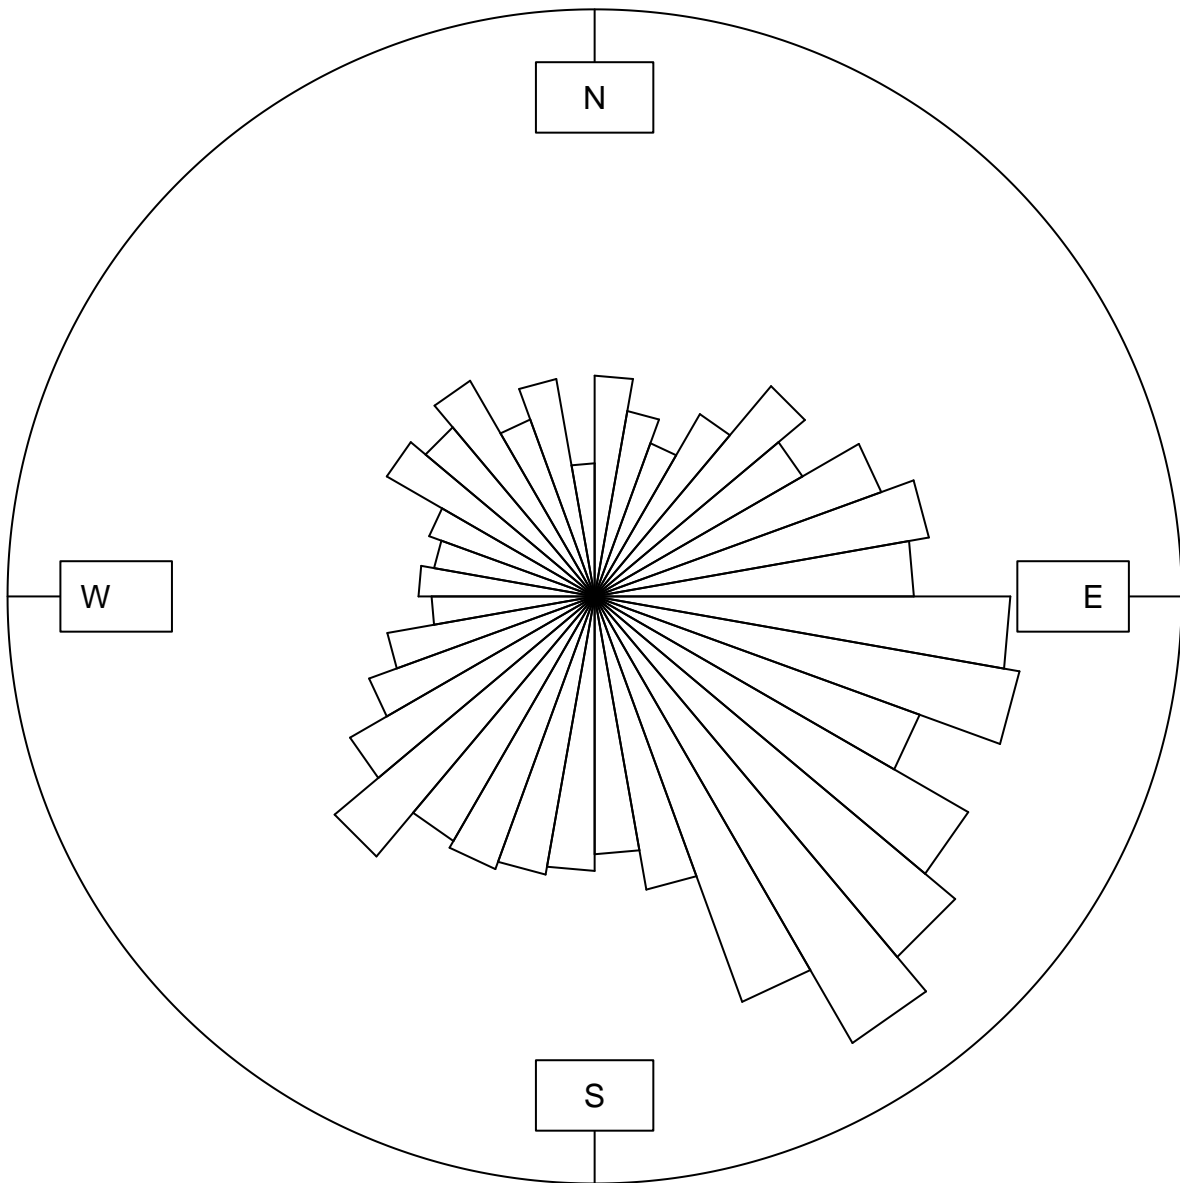

# bootstrap 858

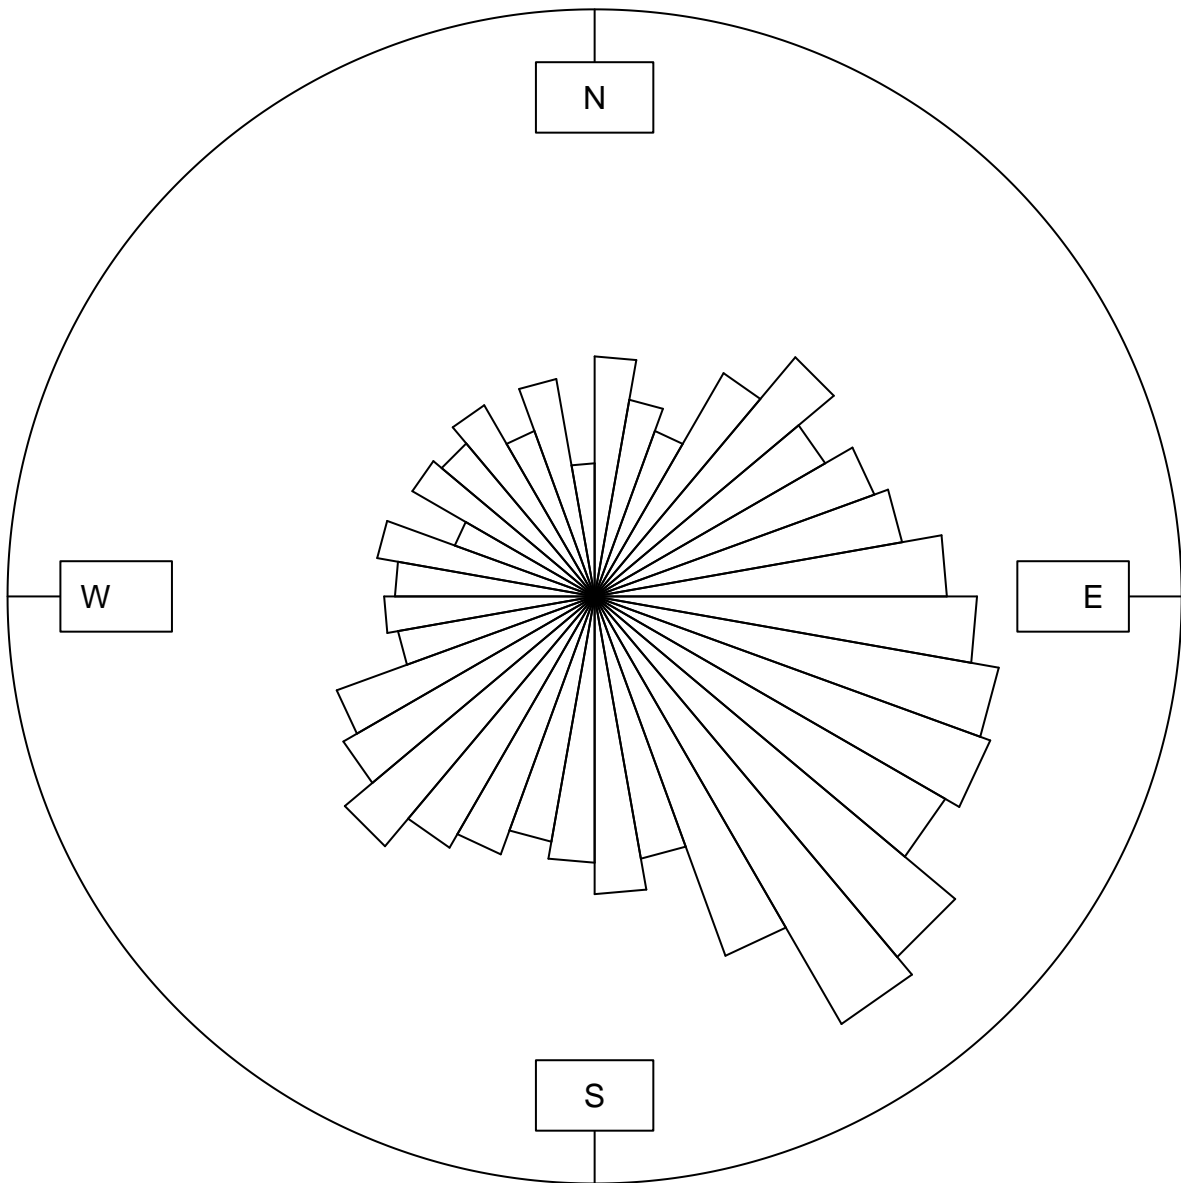

# bootstrap 859

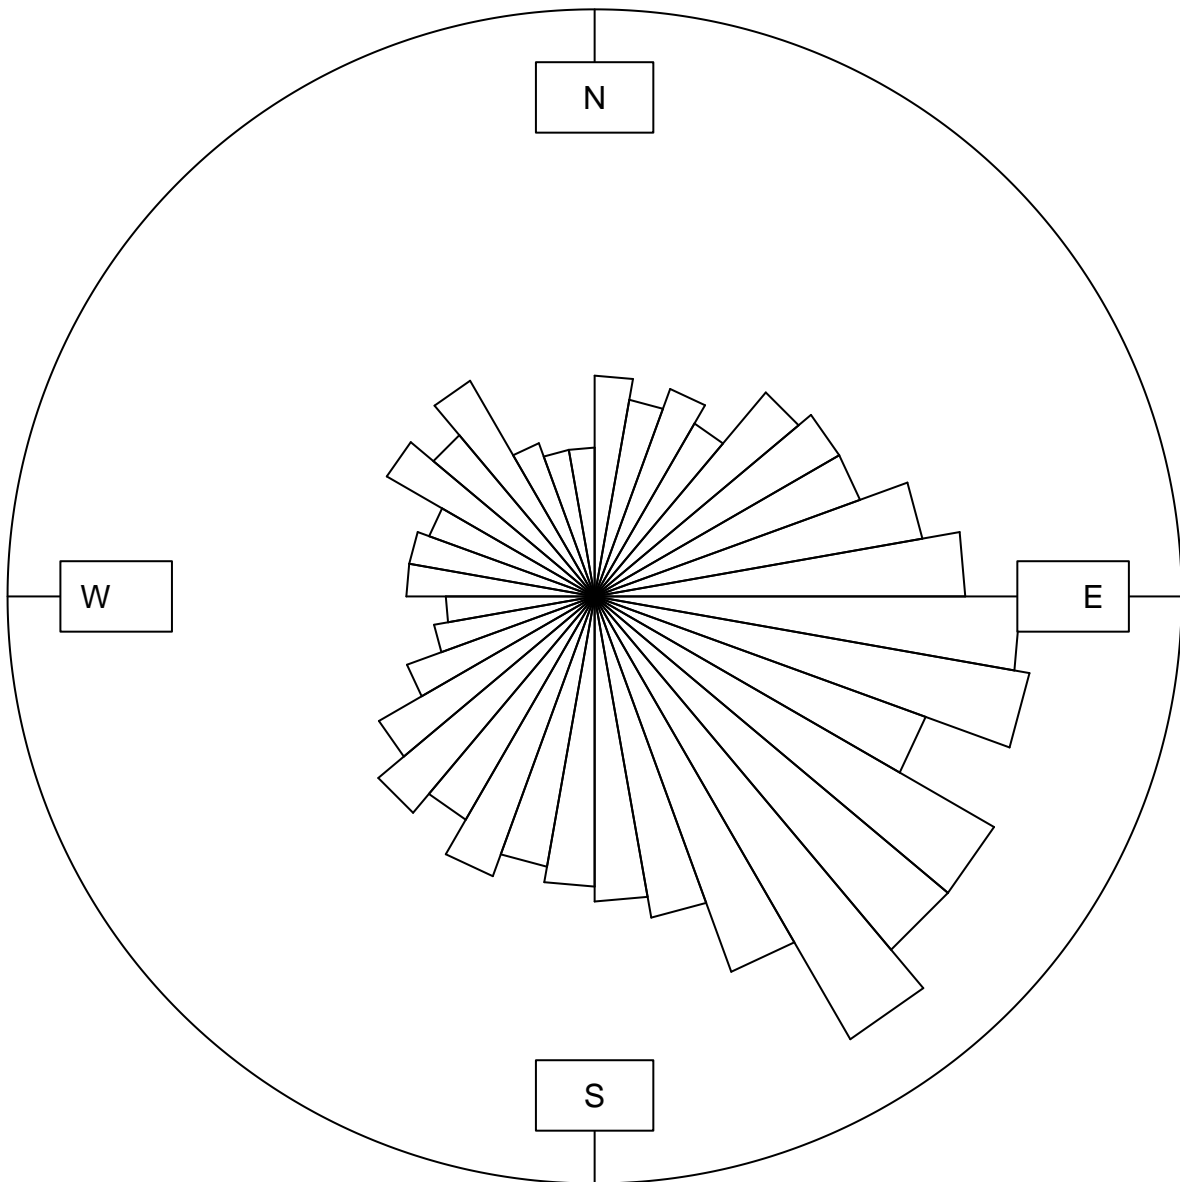

# bootstrap 860

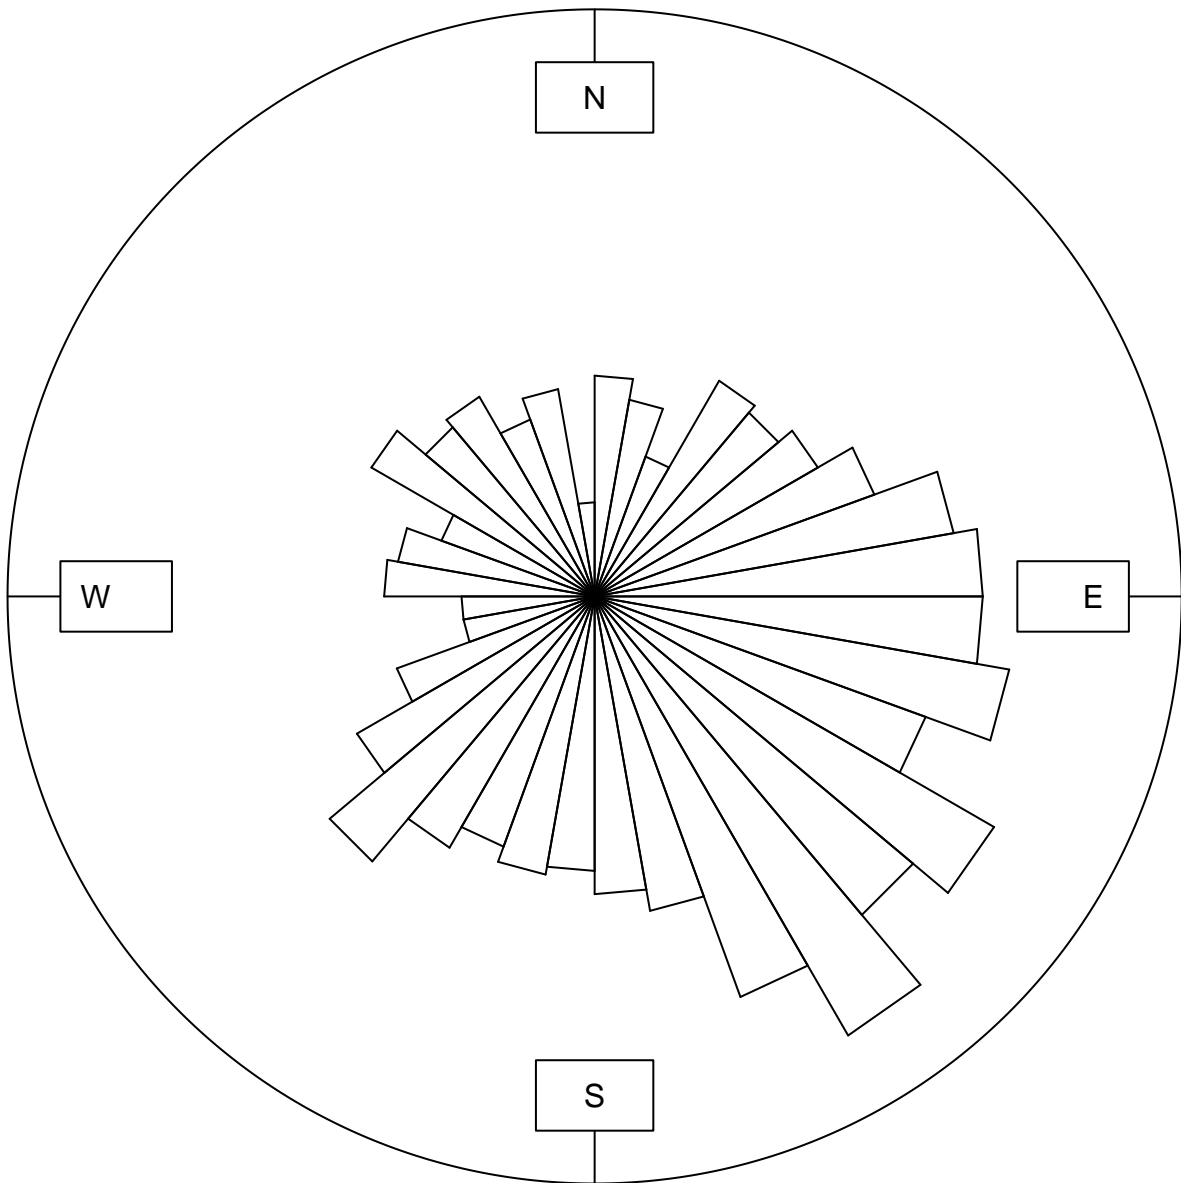

# bootstrap 861

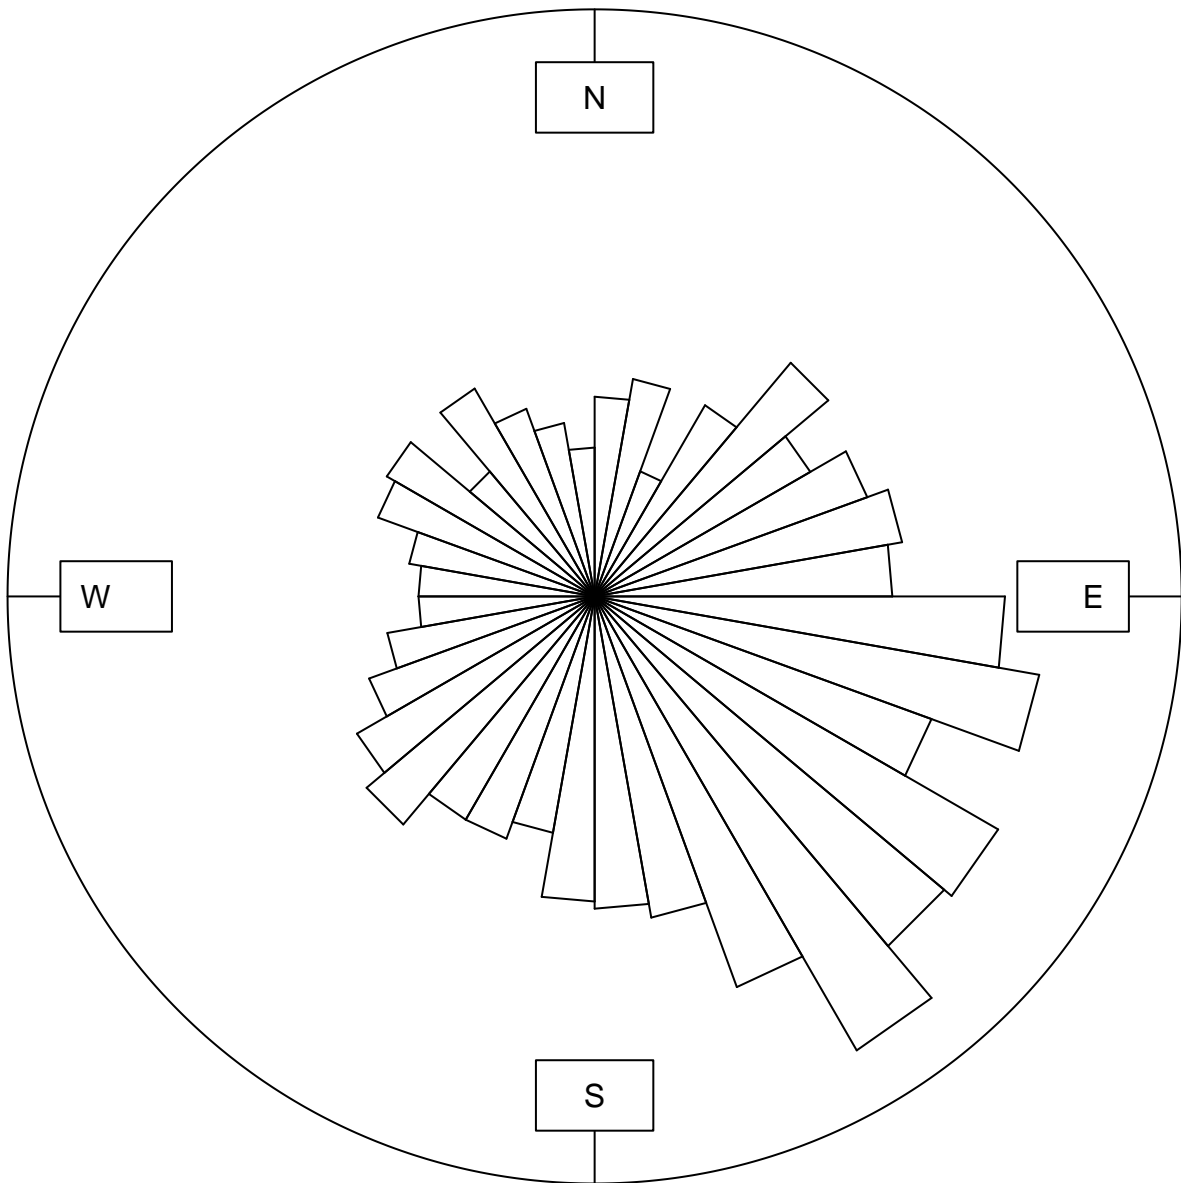

# bootstrap 862

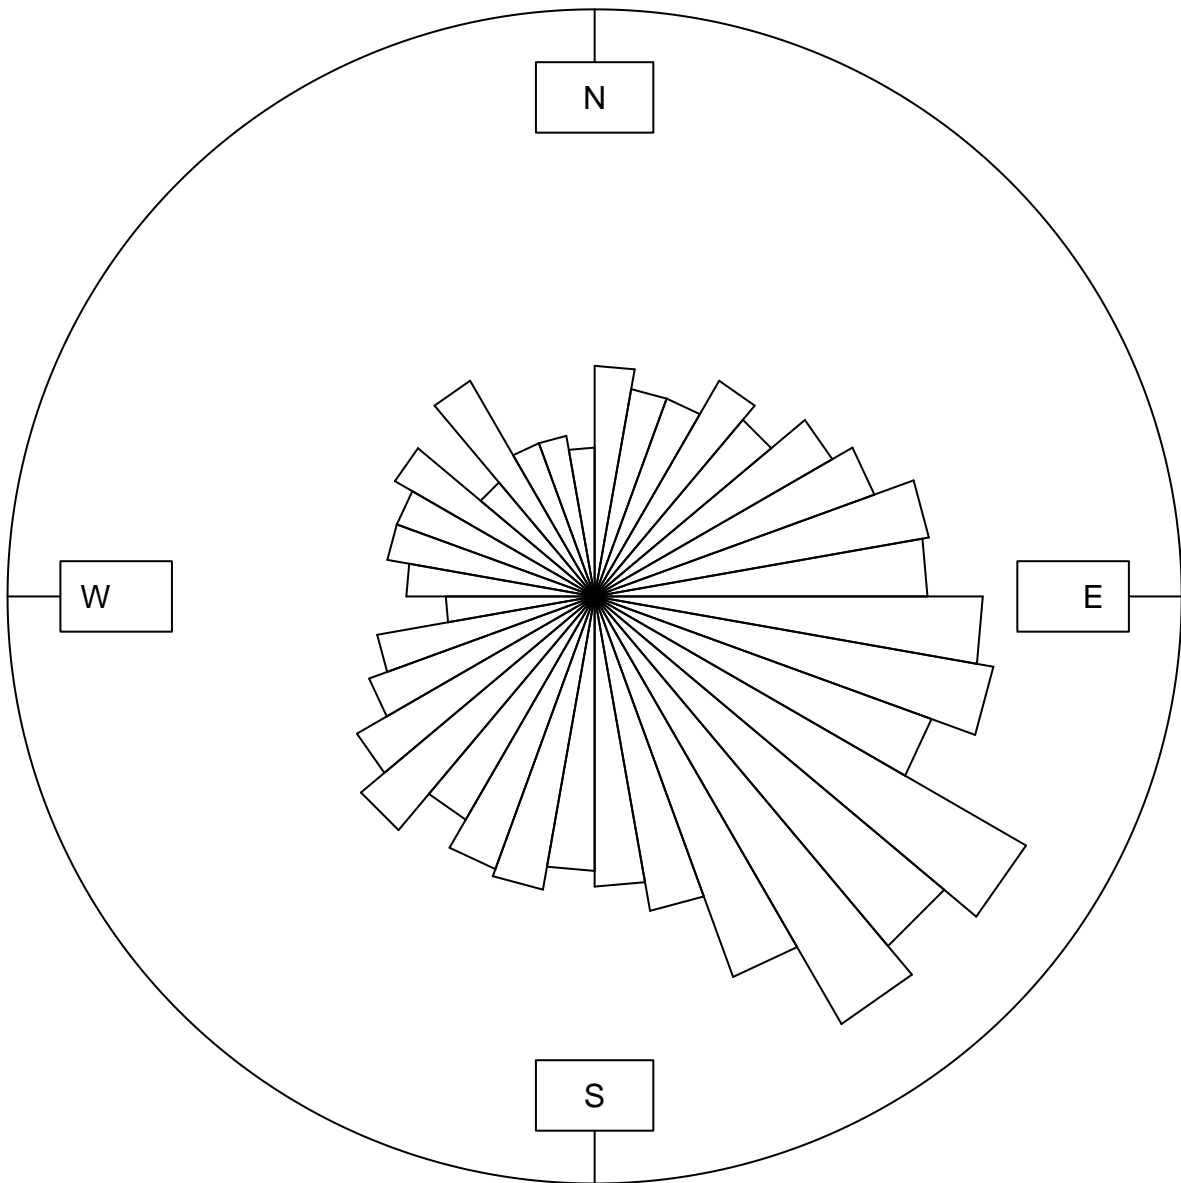

# bootstrap 863

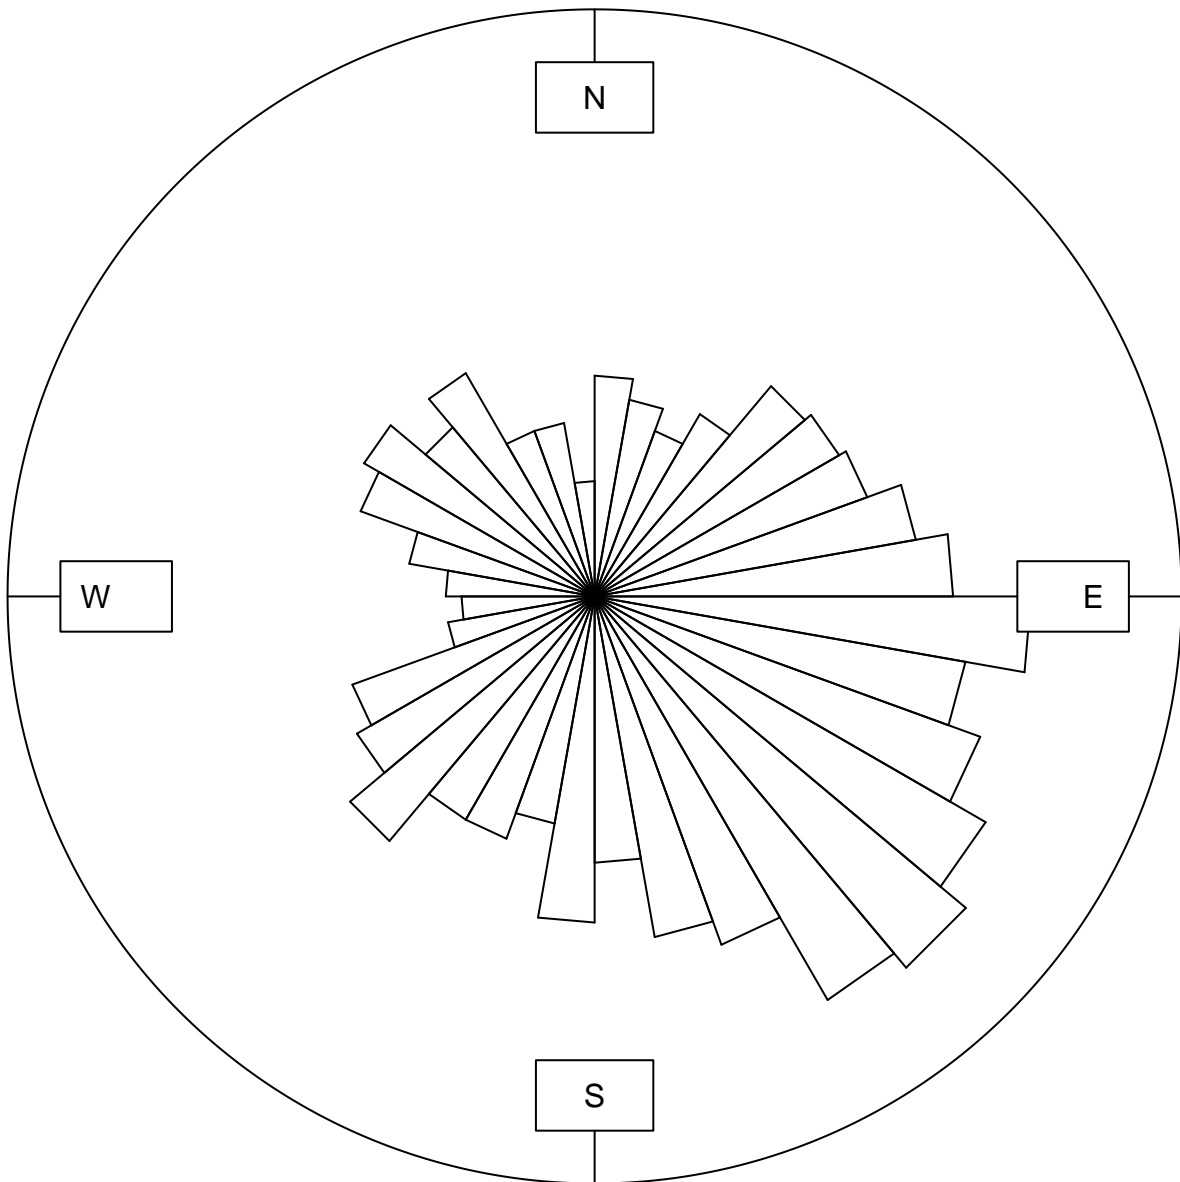

# bootstrap 864

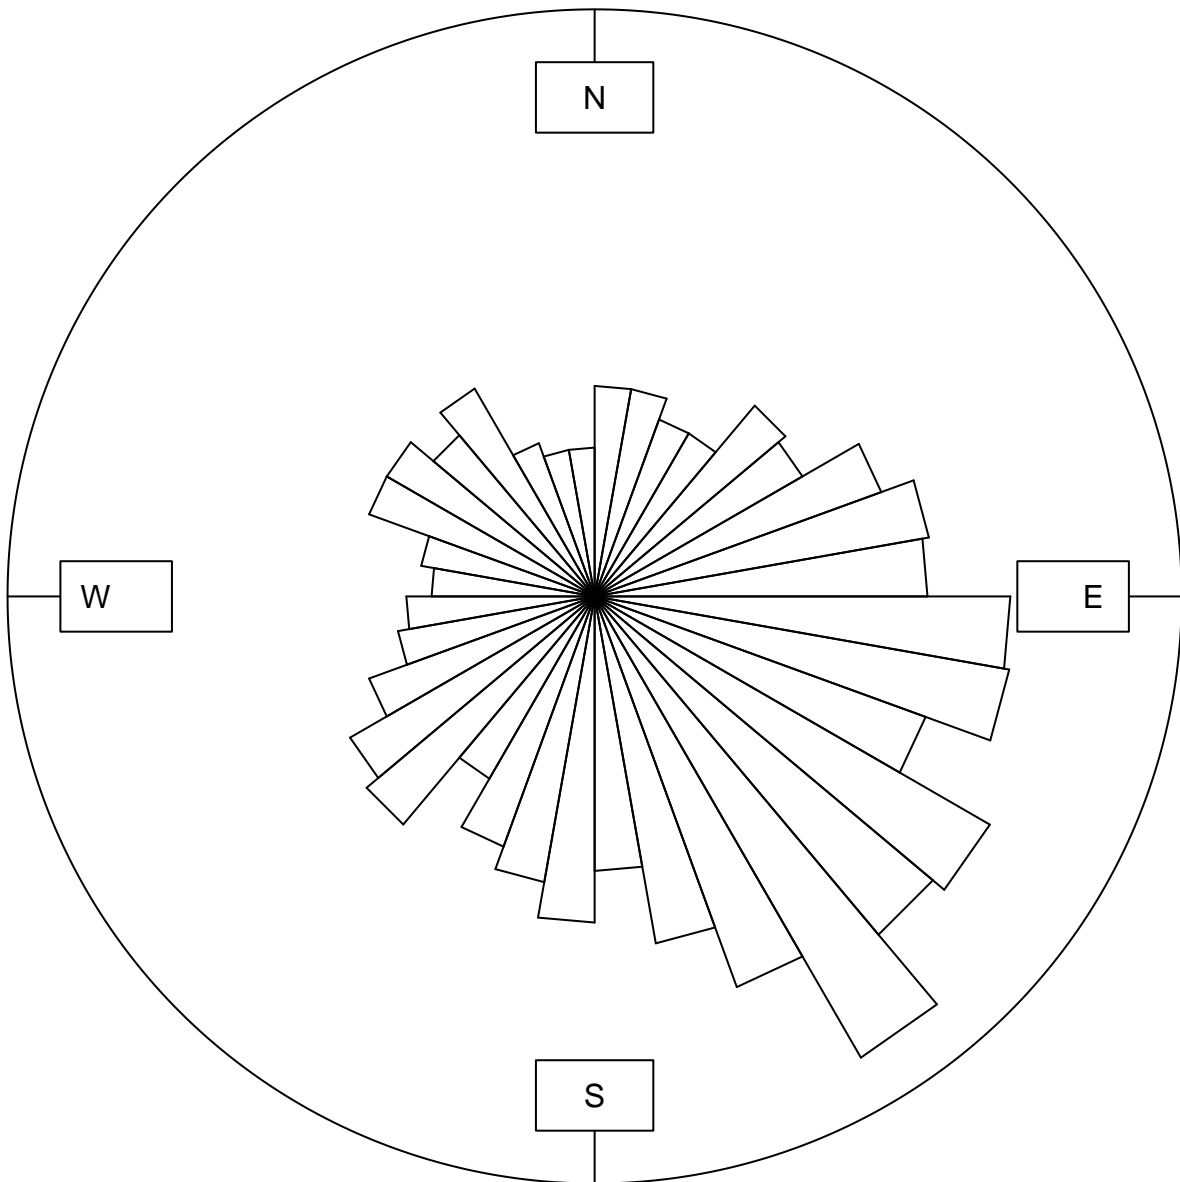



# bootstrap 865

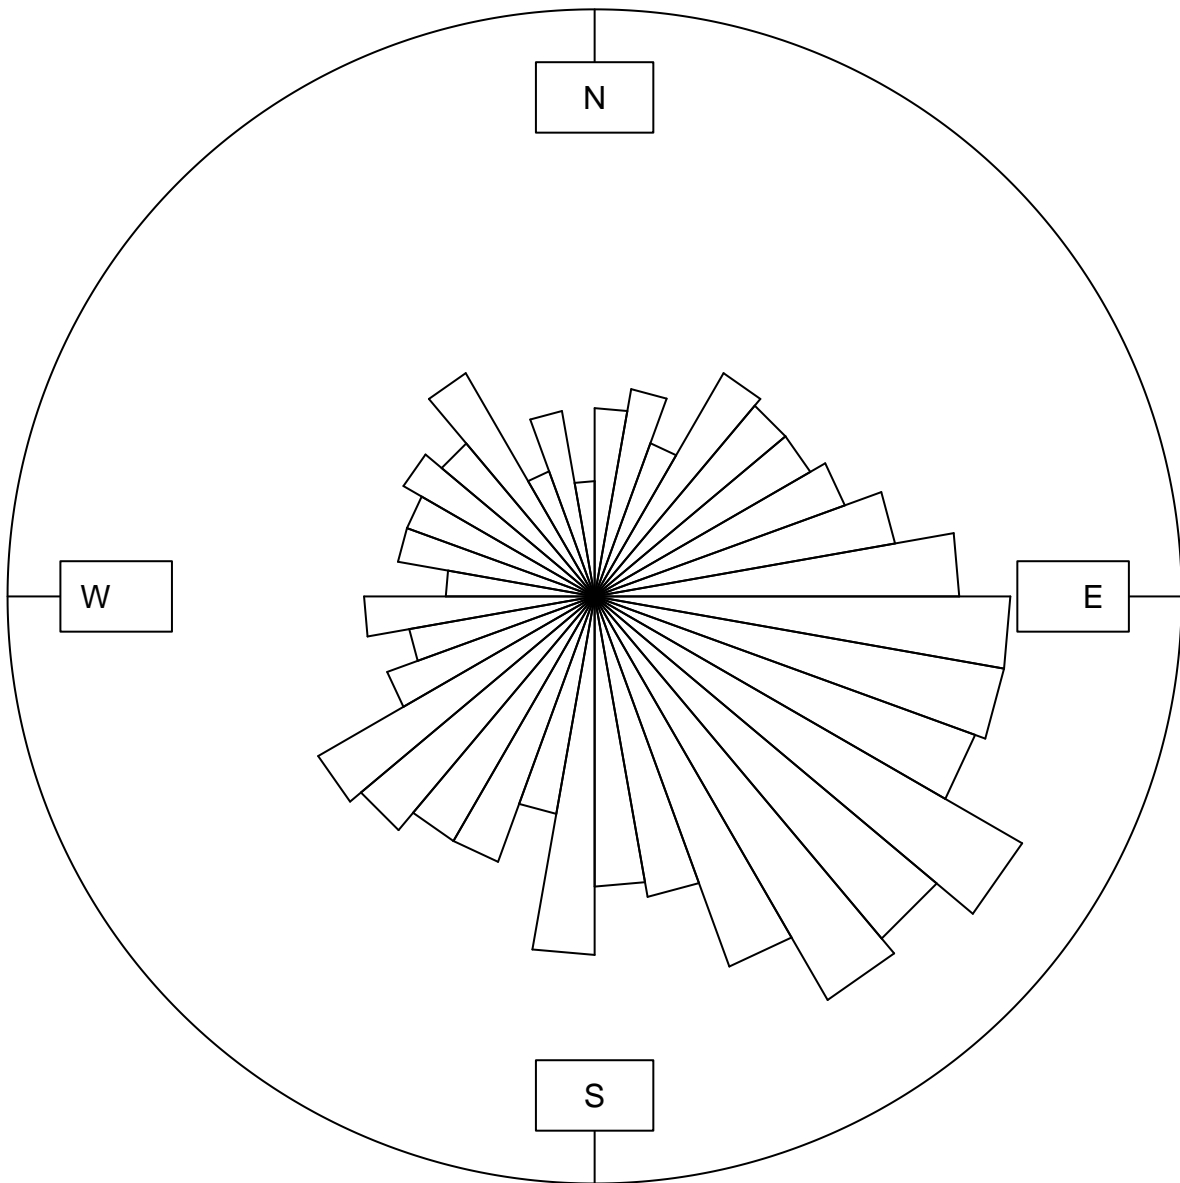

# bootstrap 866

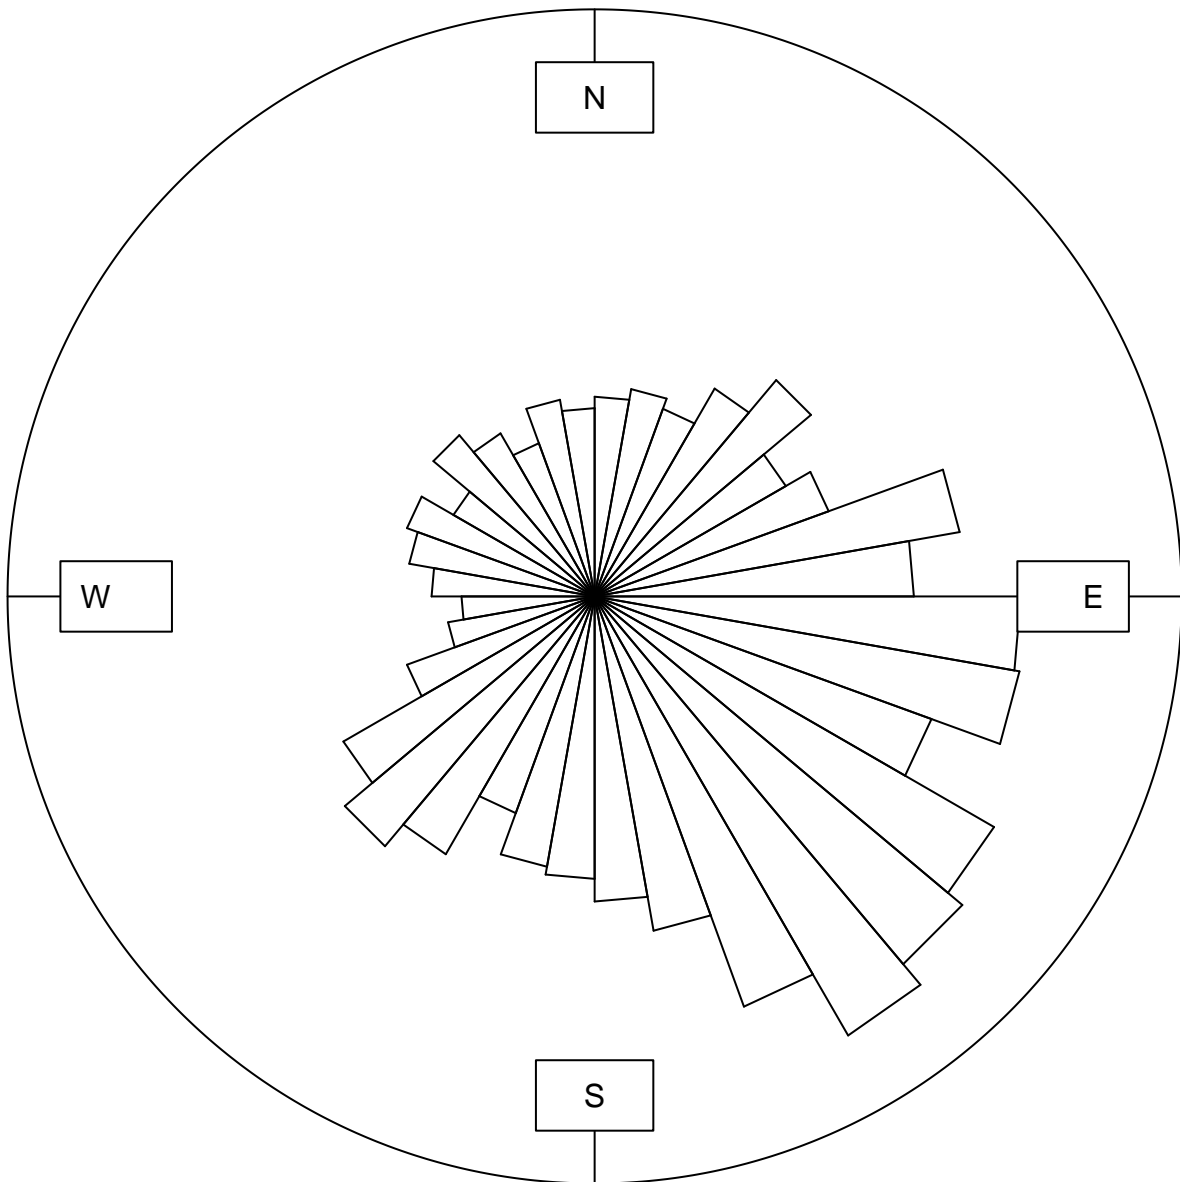

# bootstrap 867

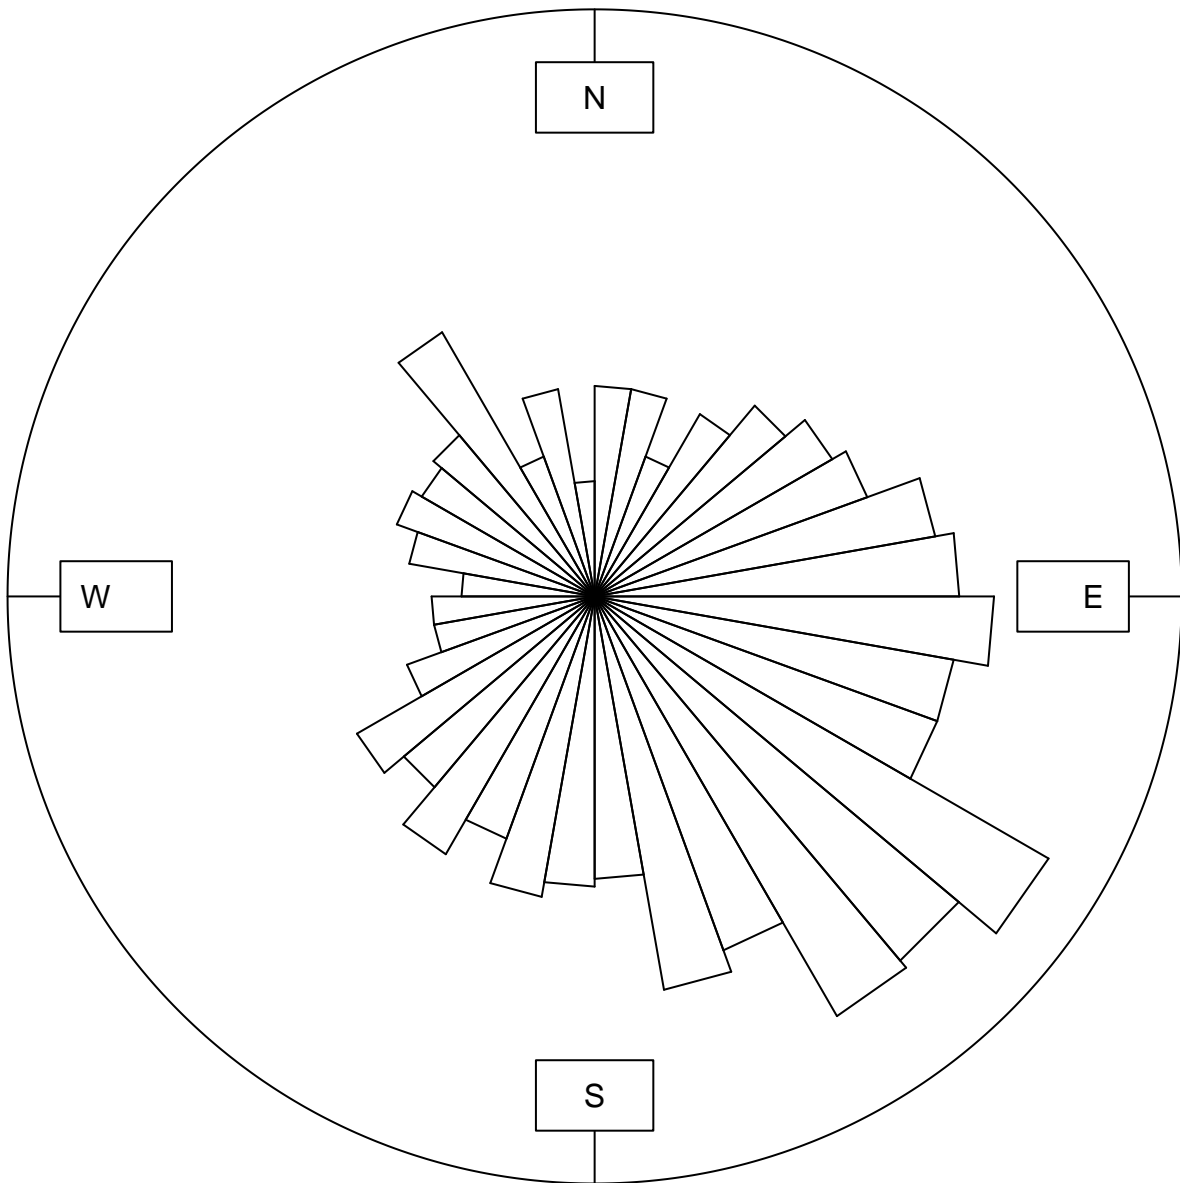

# bootstrap 868

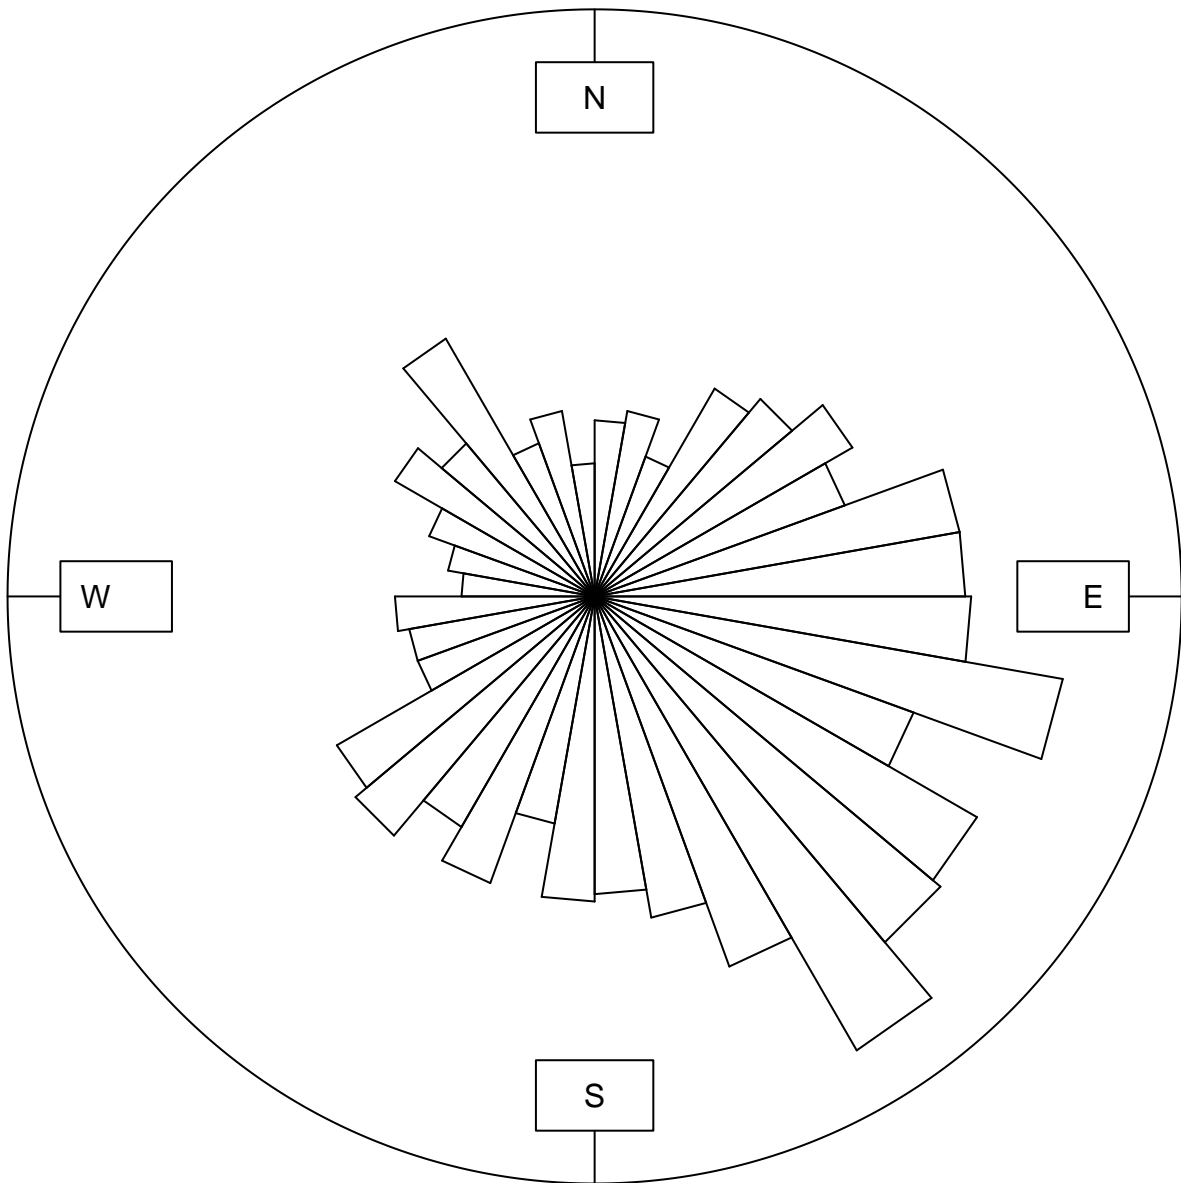

# bootstrap 869

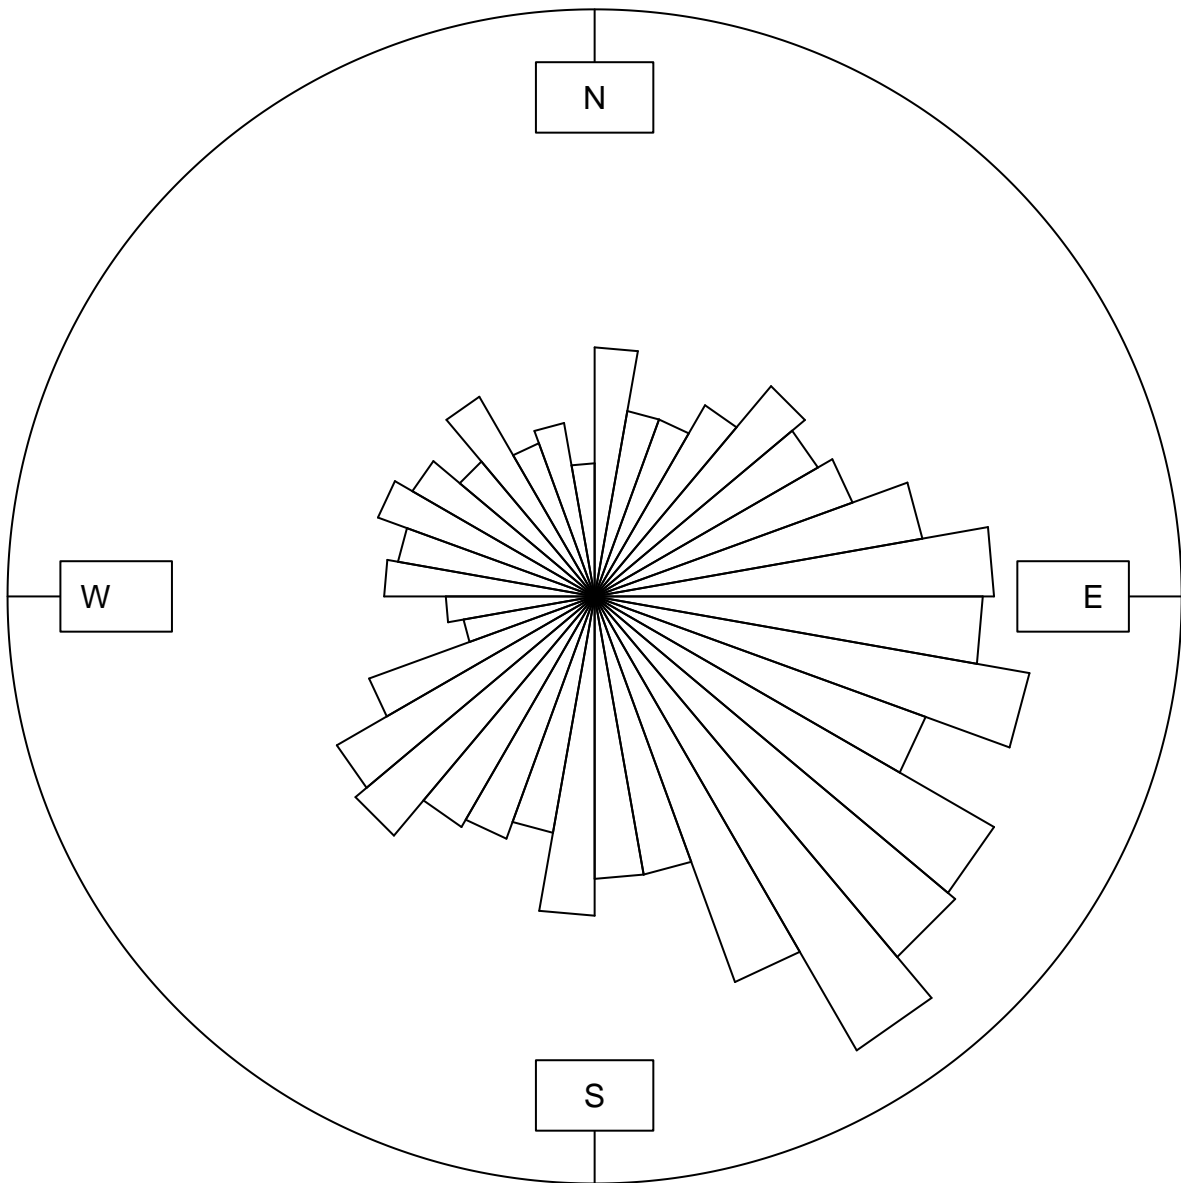

# bootstrap 870

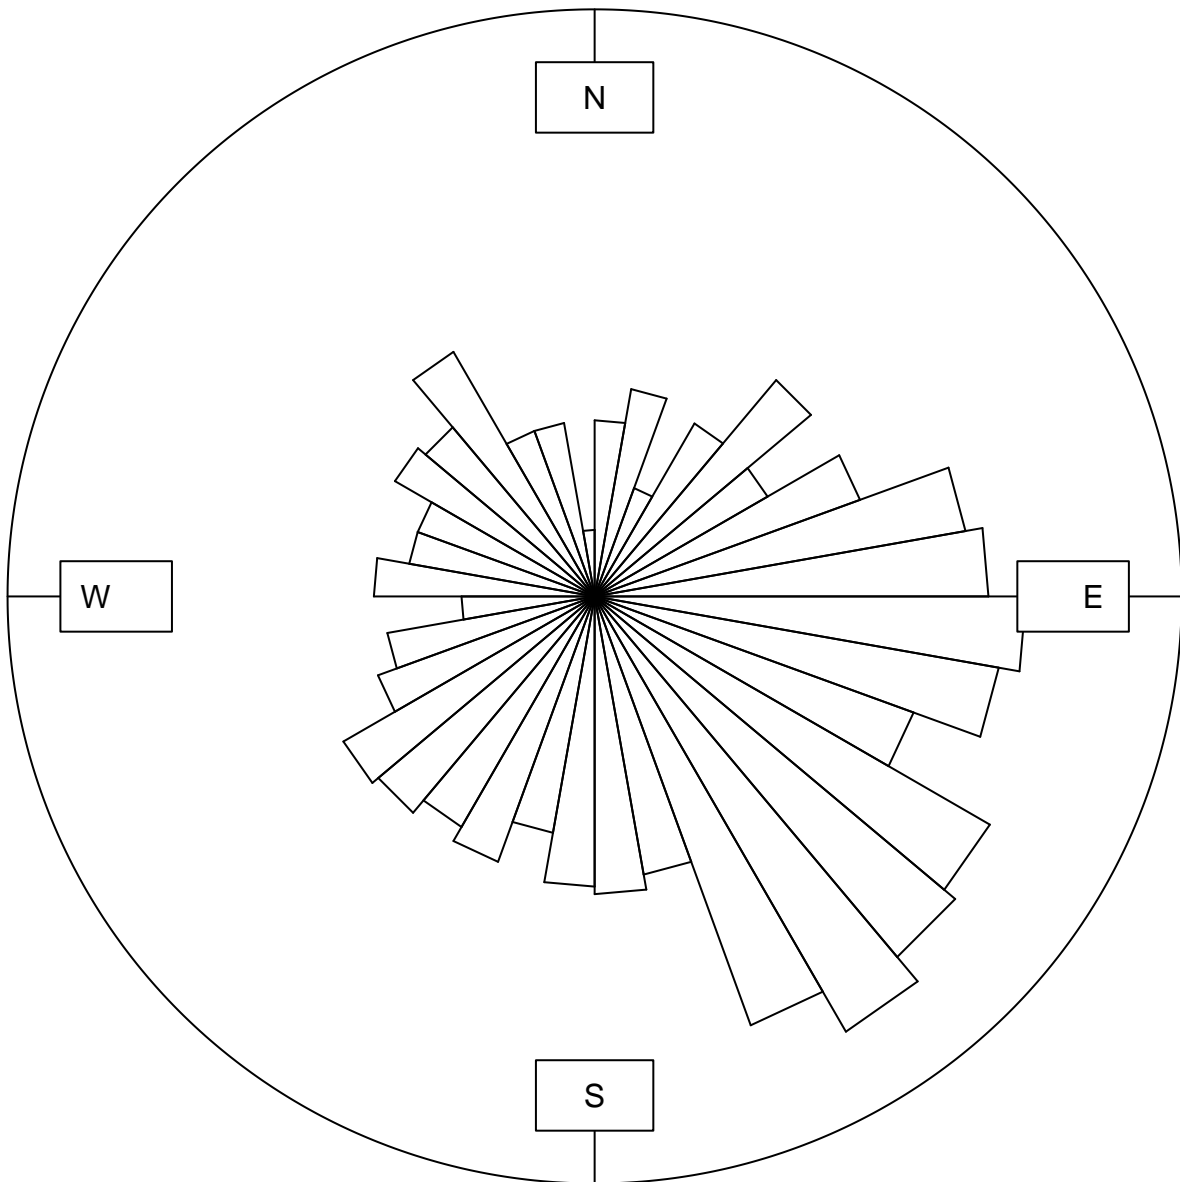

# bootstrap 871

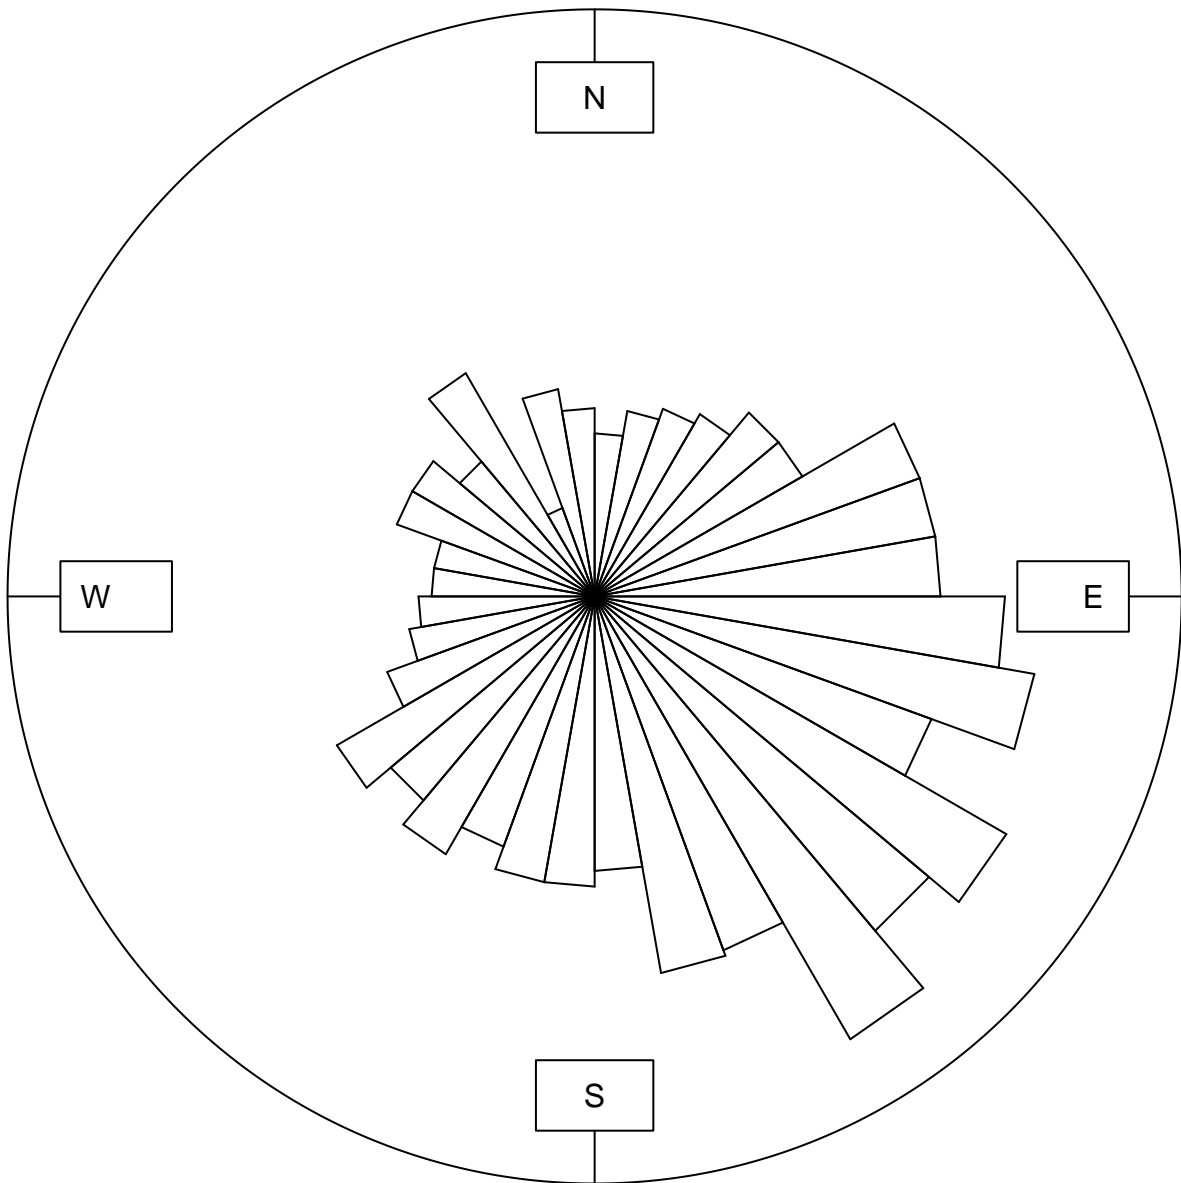

# bootstrap 872

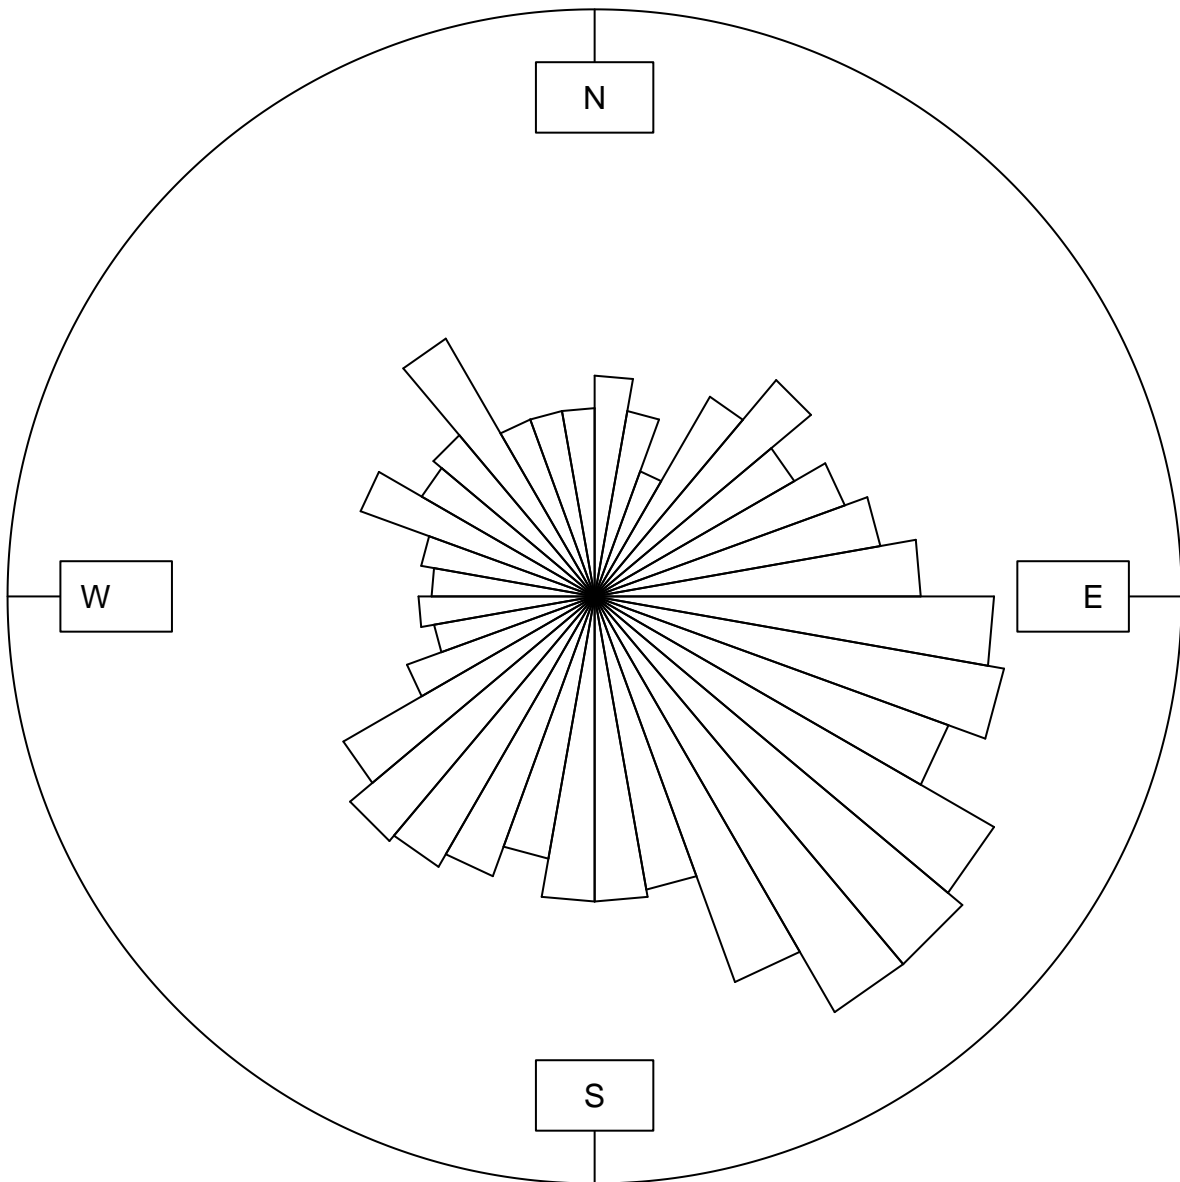



# bootstrap 873

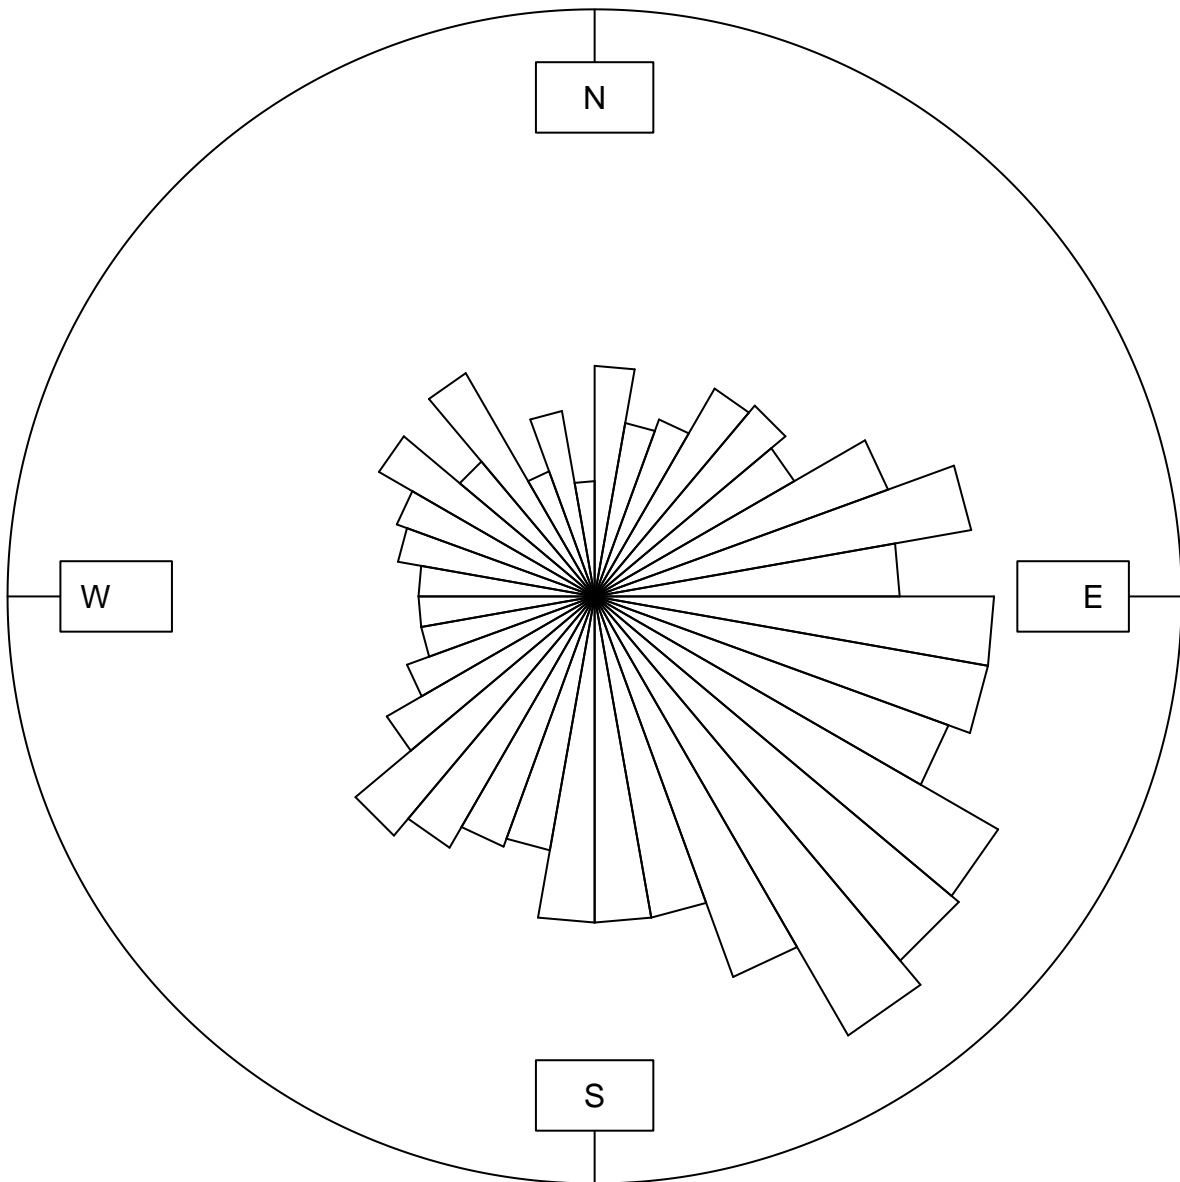

# bootstrap 874

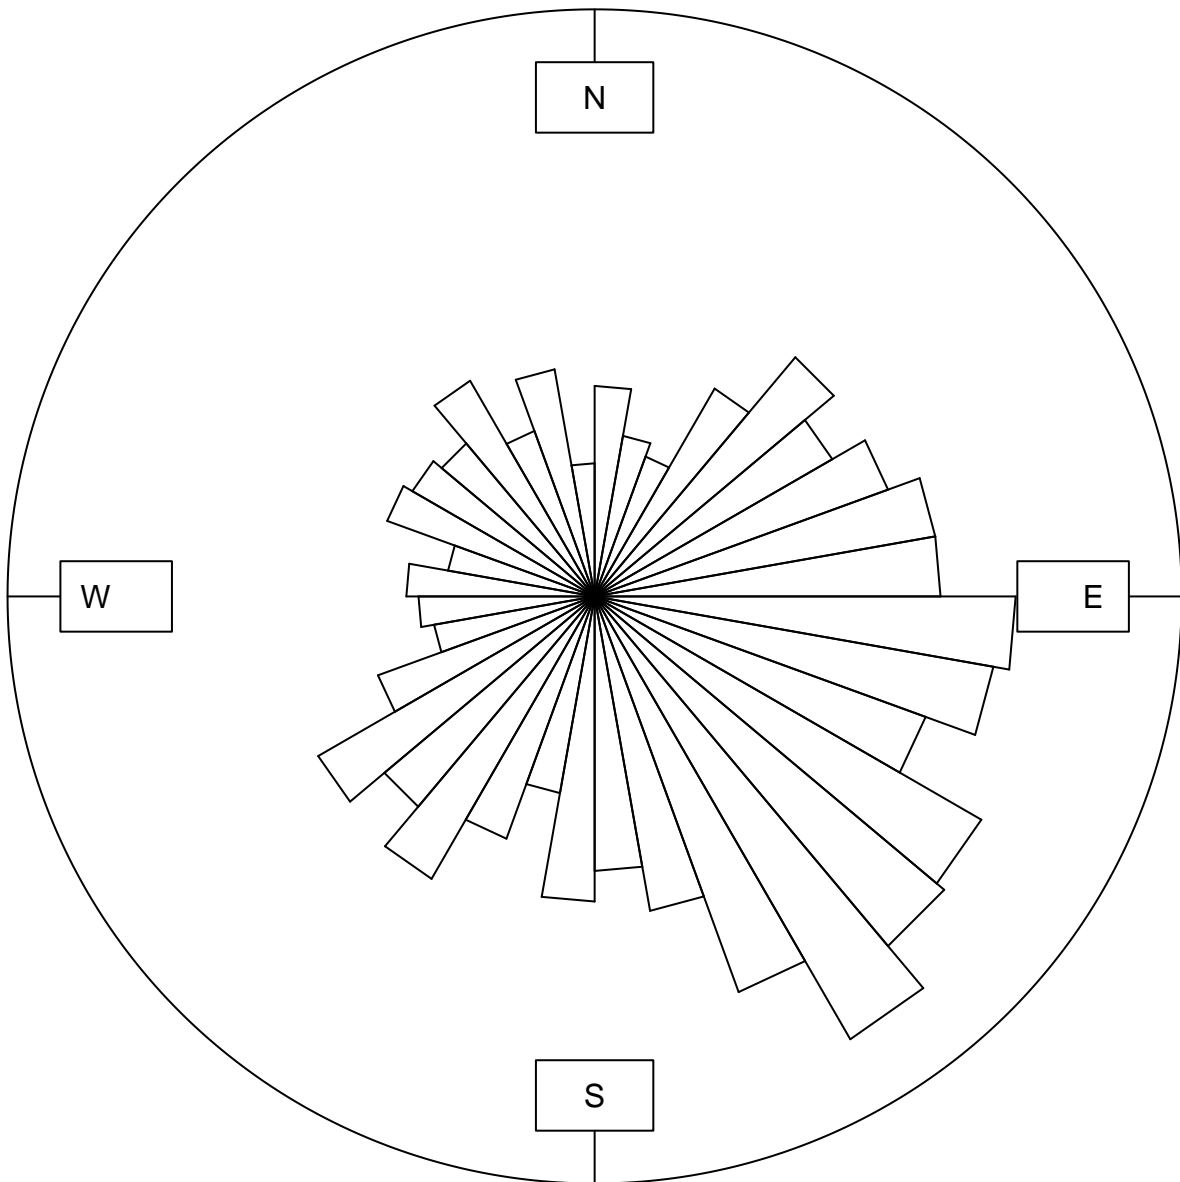

# bootstrap 875

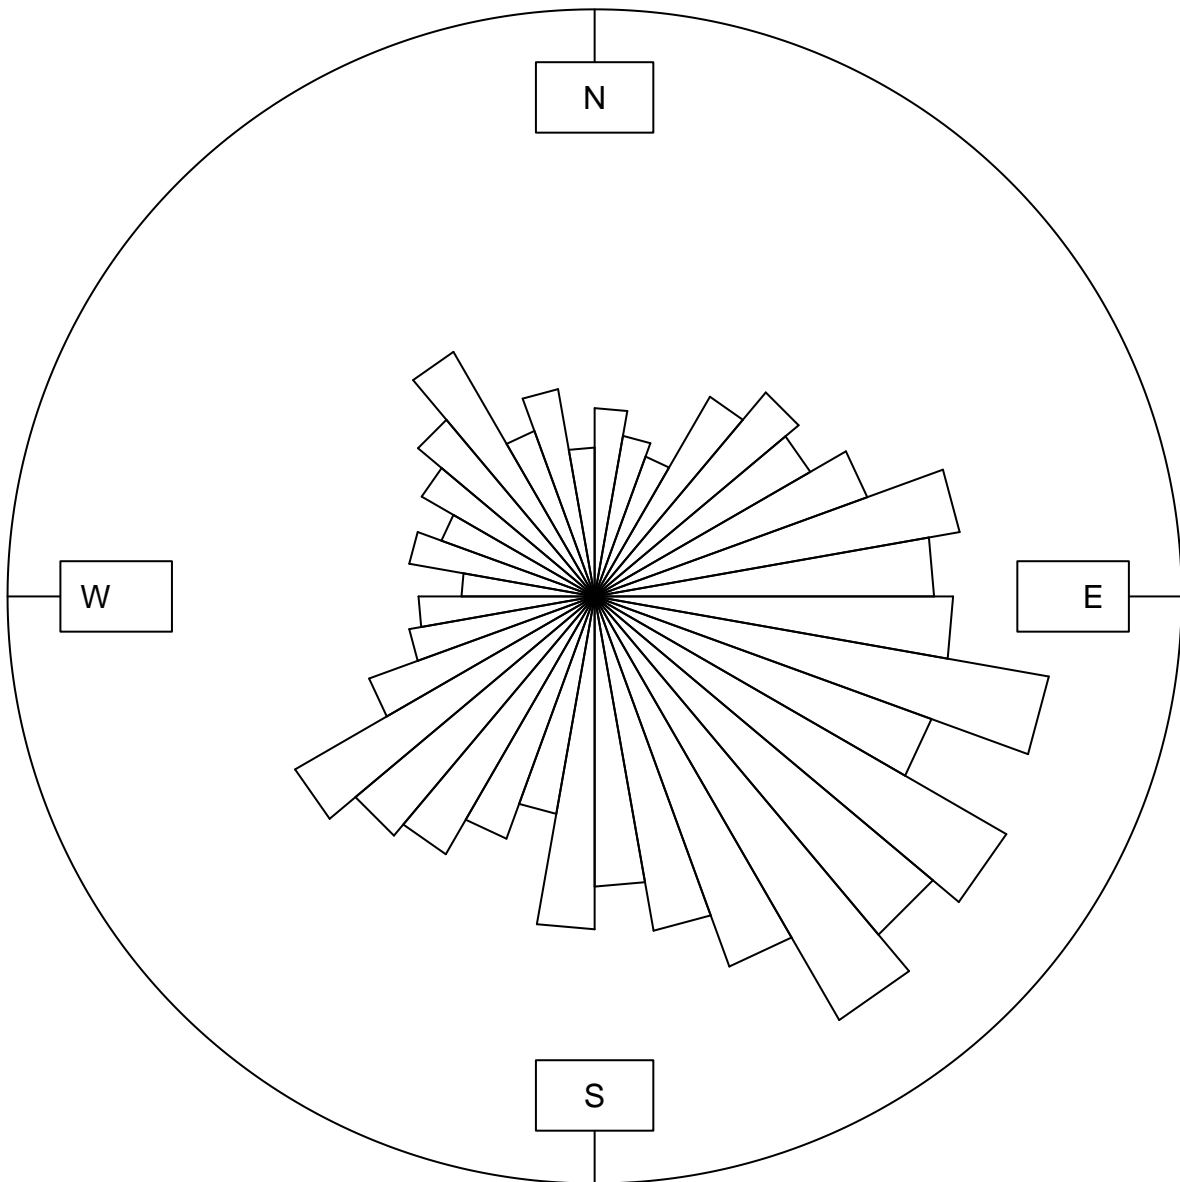

# bootstrap 876

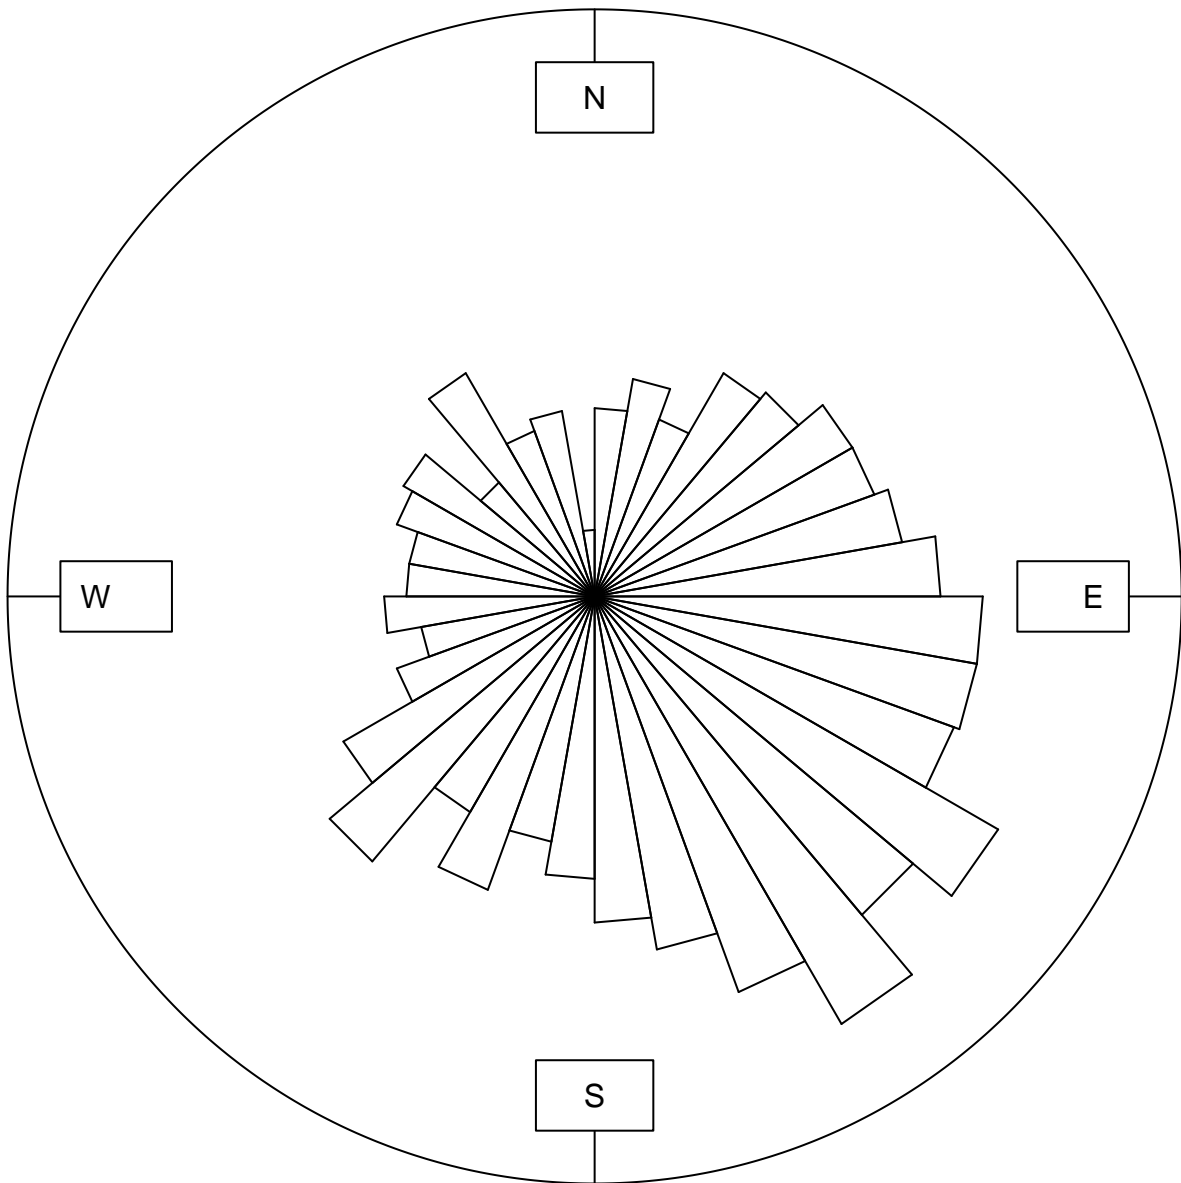

# bootstrap 877

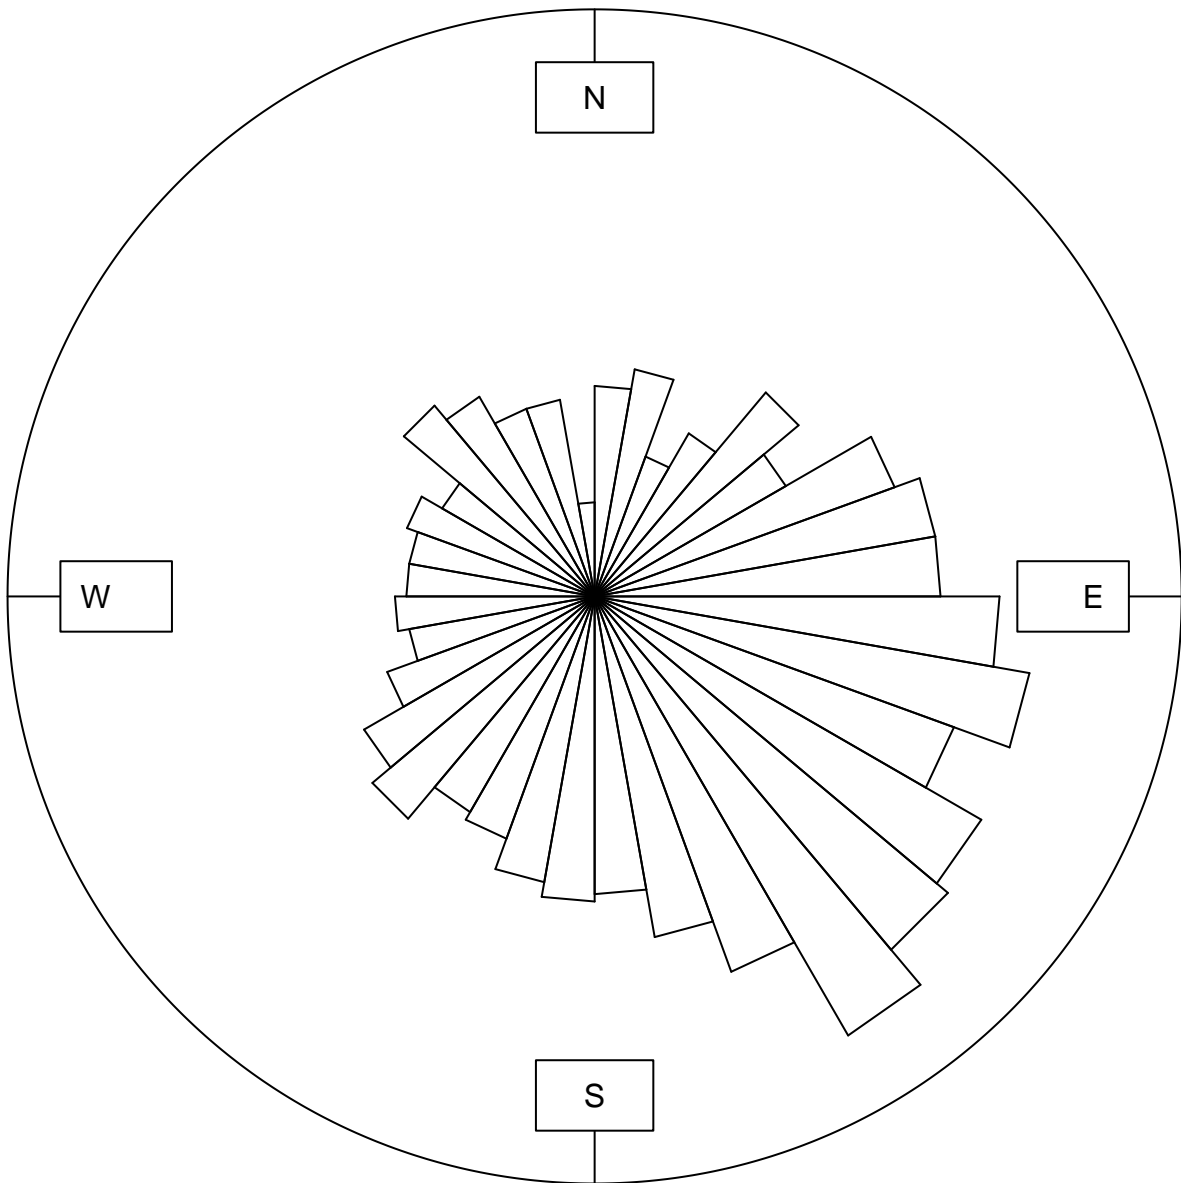

# bootstrap 878

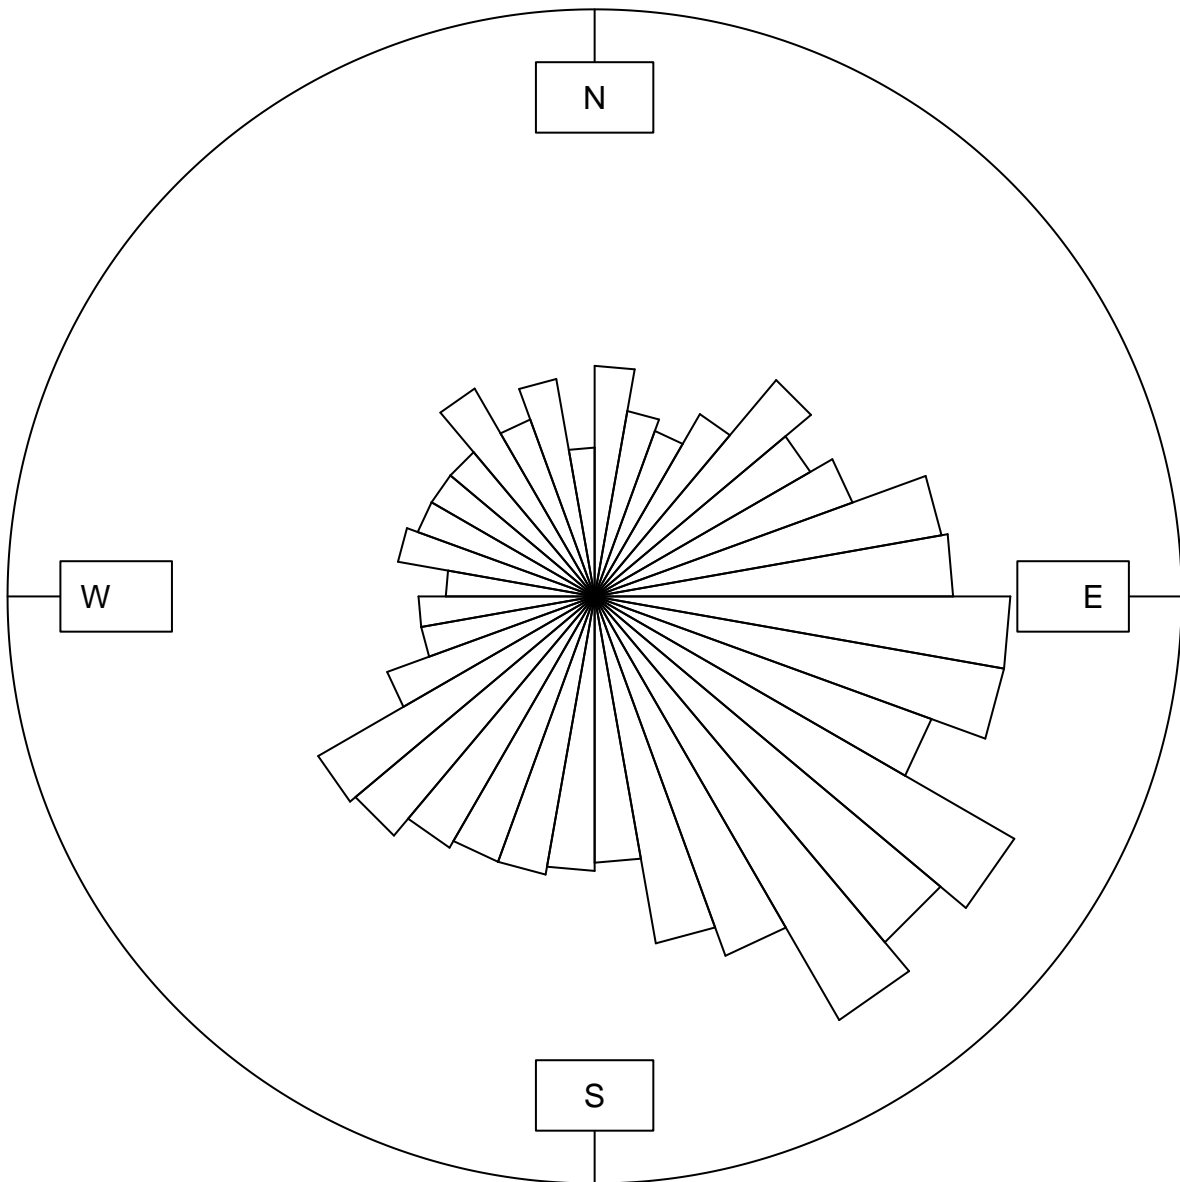

# bootstrap 879

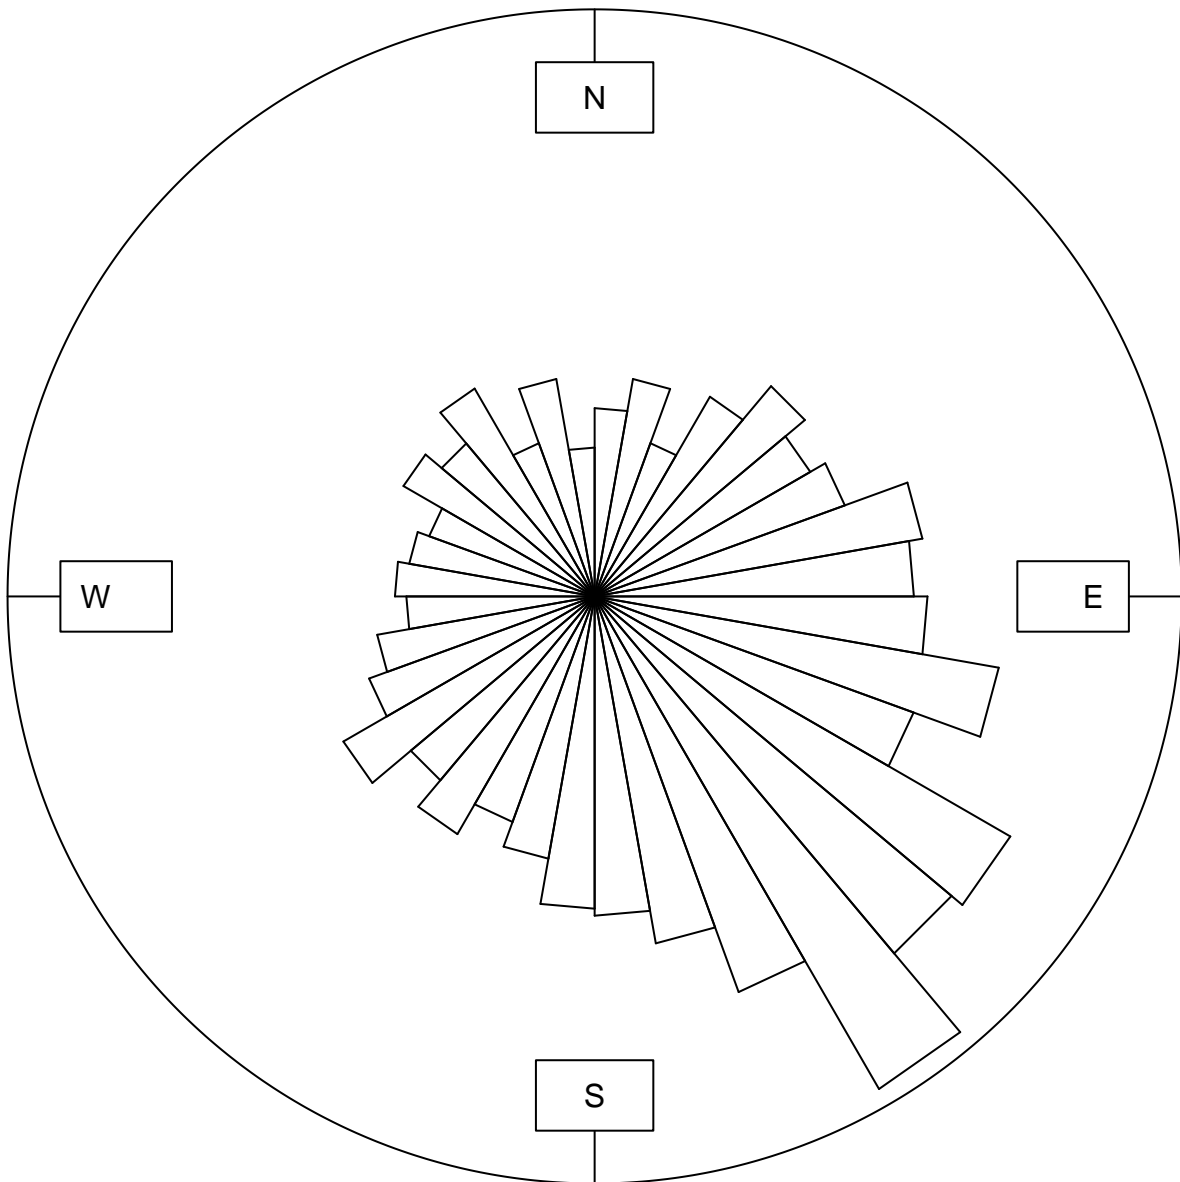

# bootstrap 880

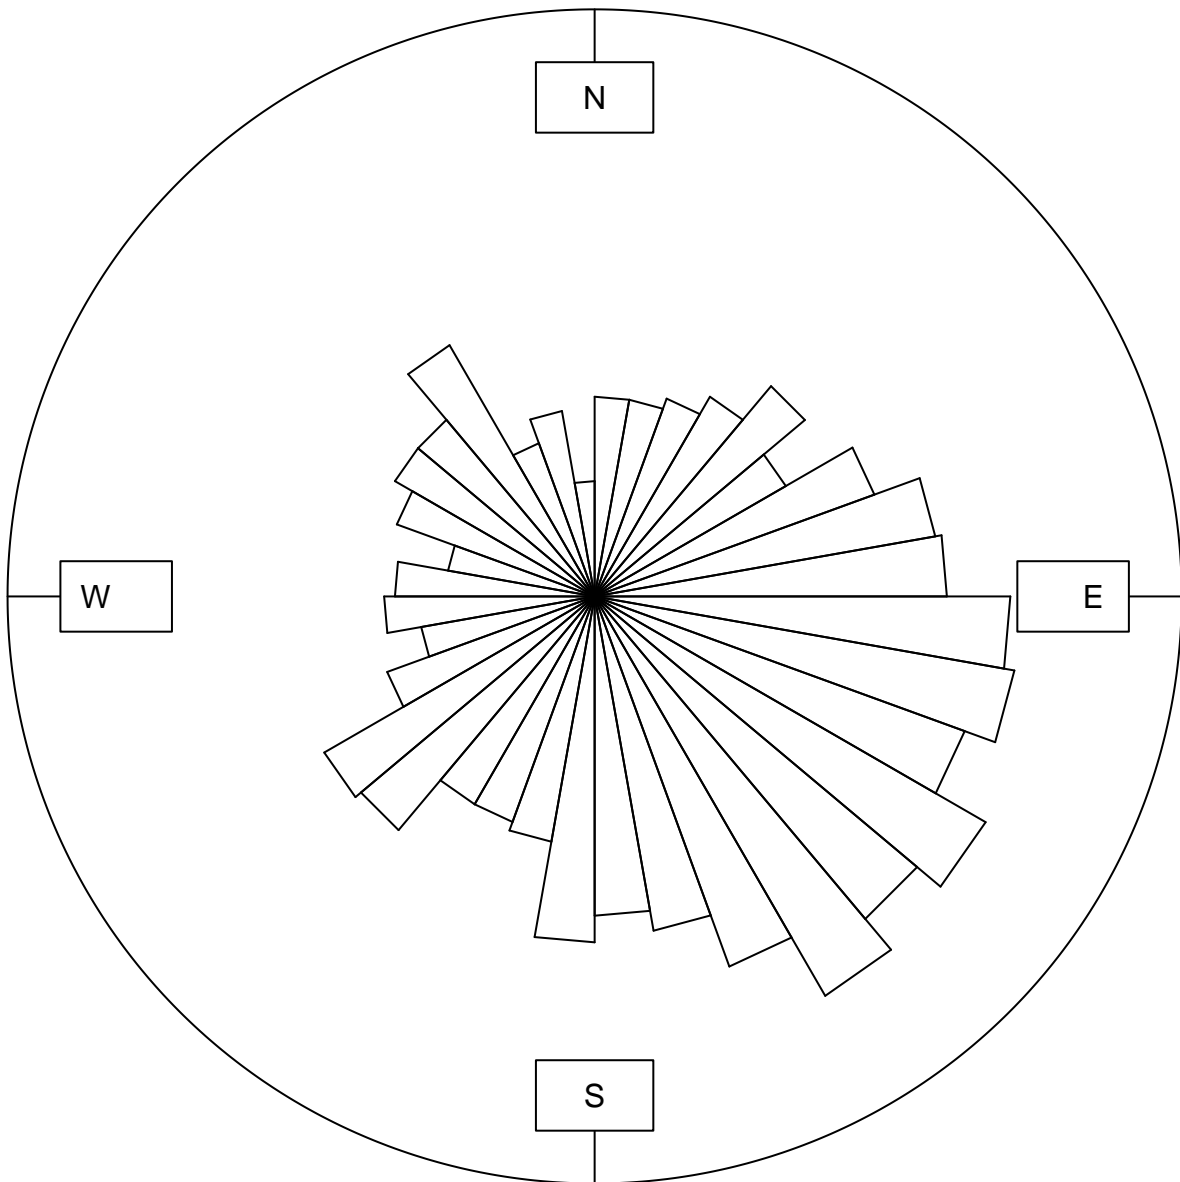



# bootstrap 881

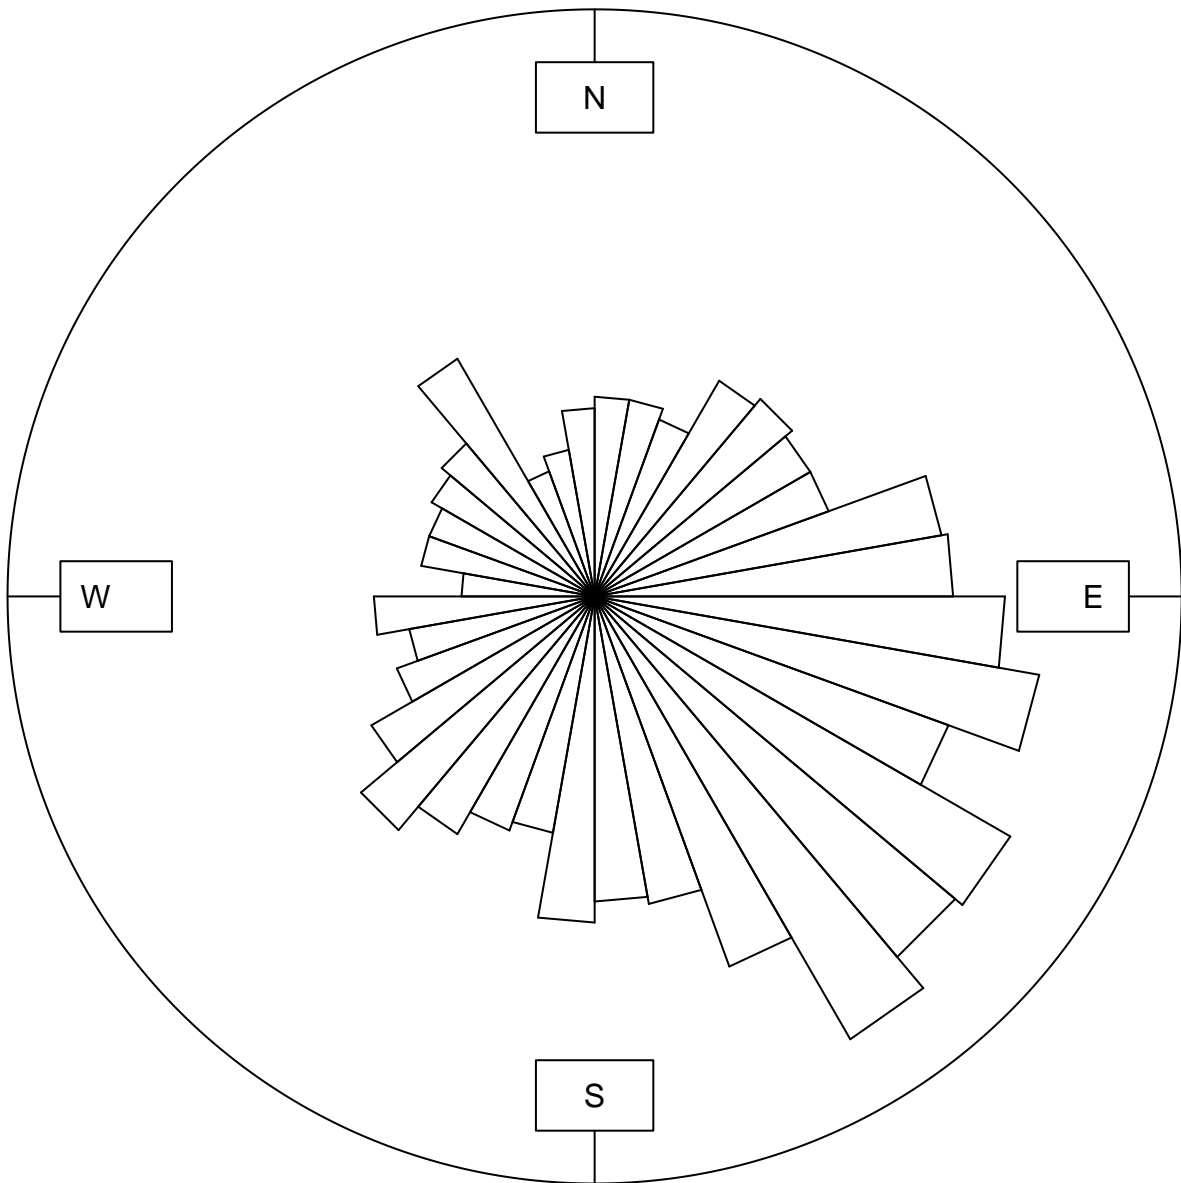

# bootstrap 882

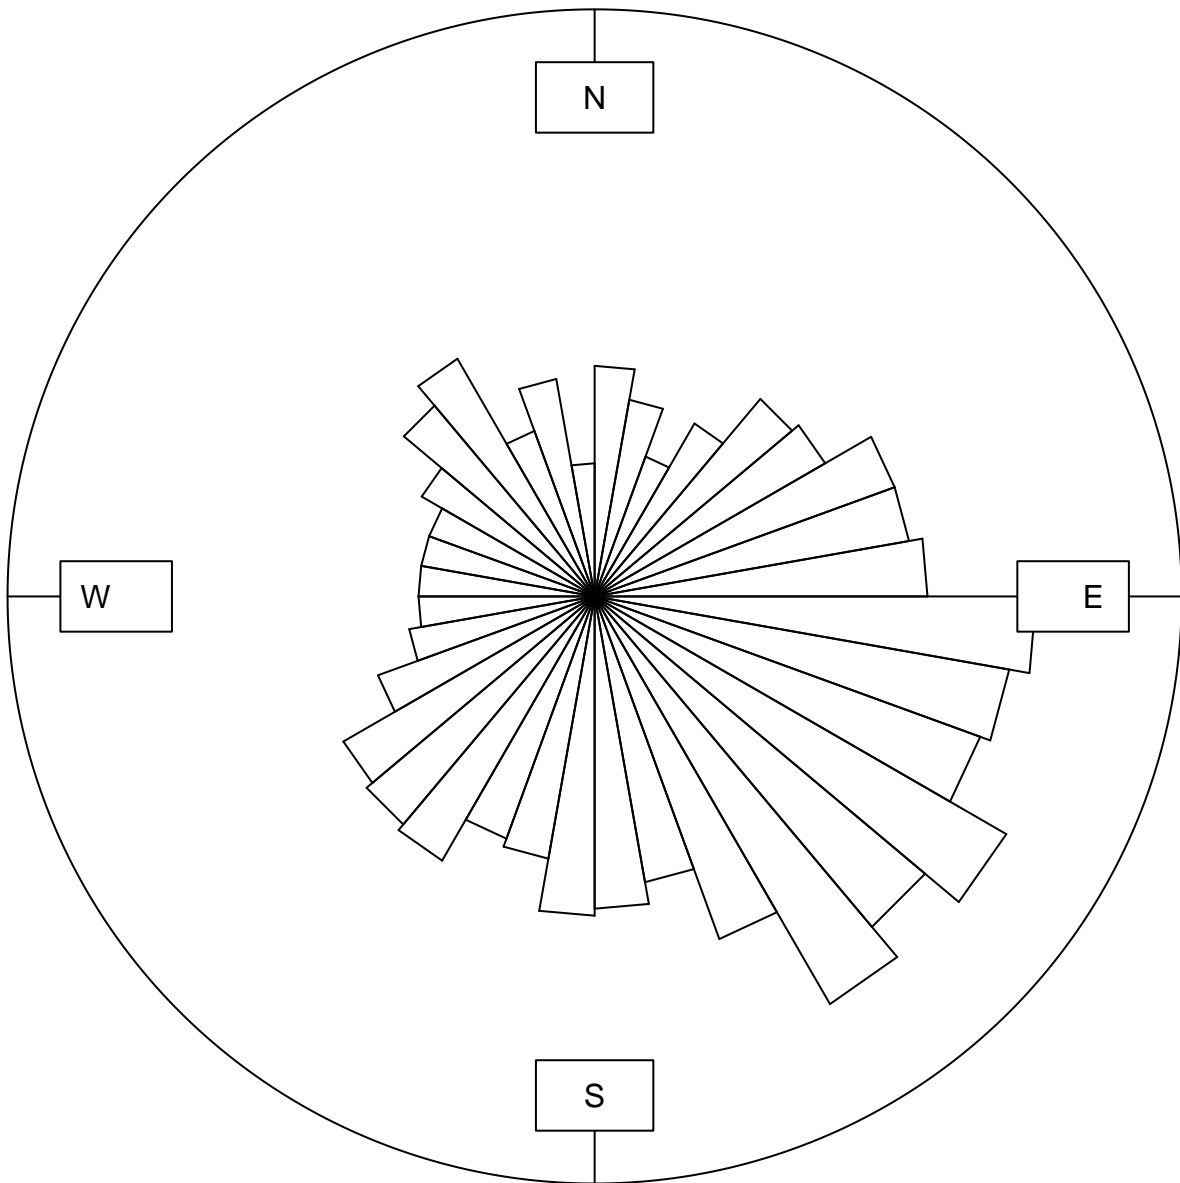

# bootstrap 883

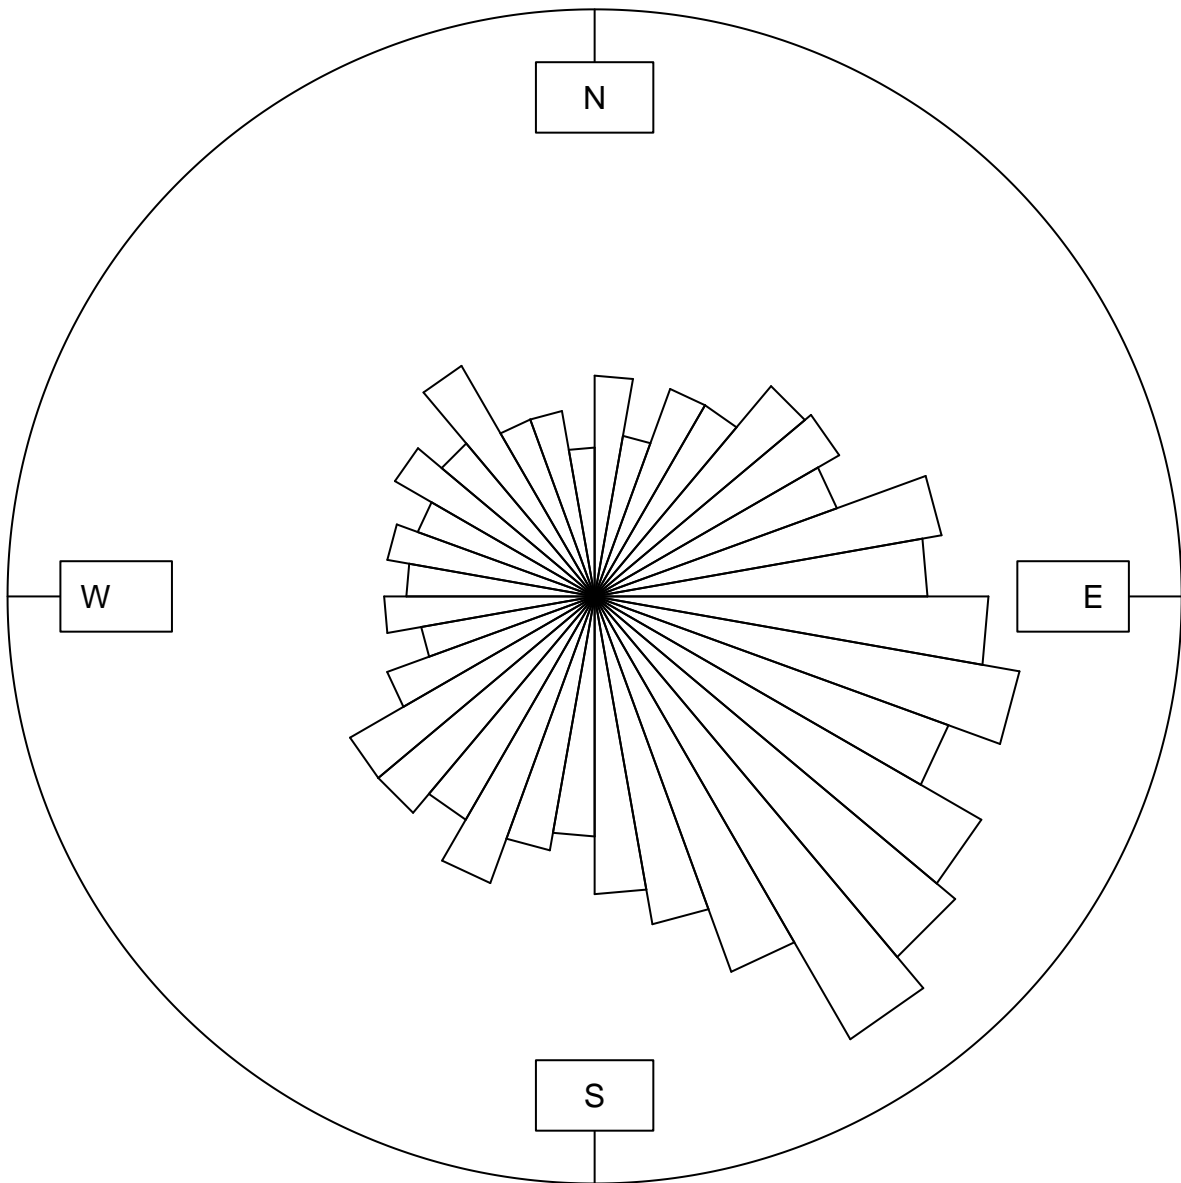

# bootstrap 884

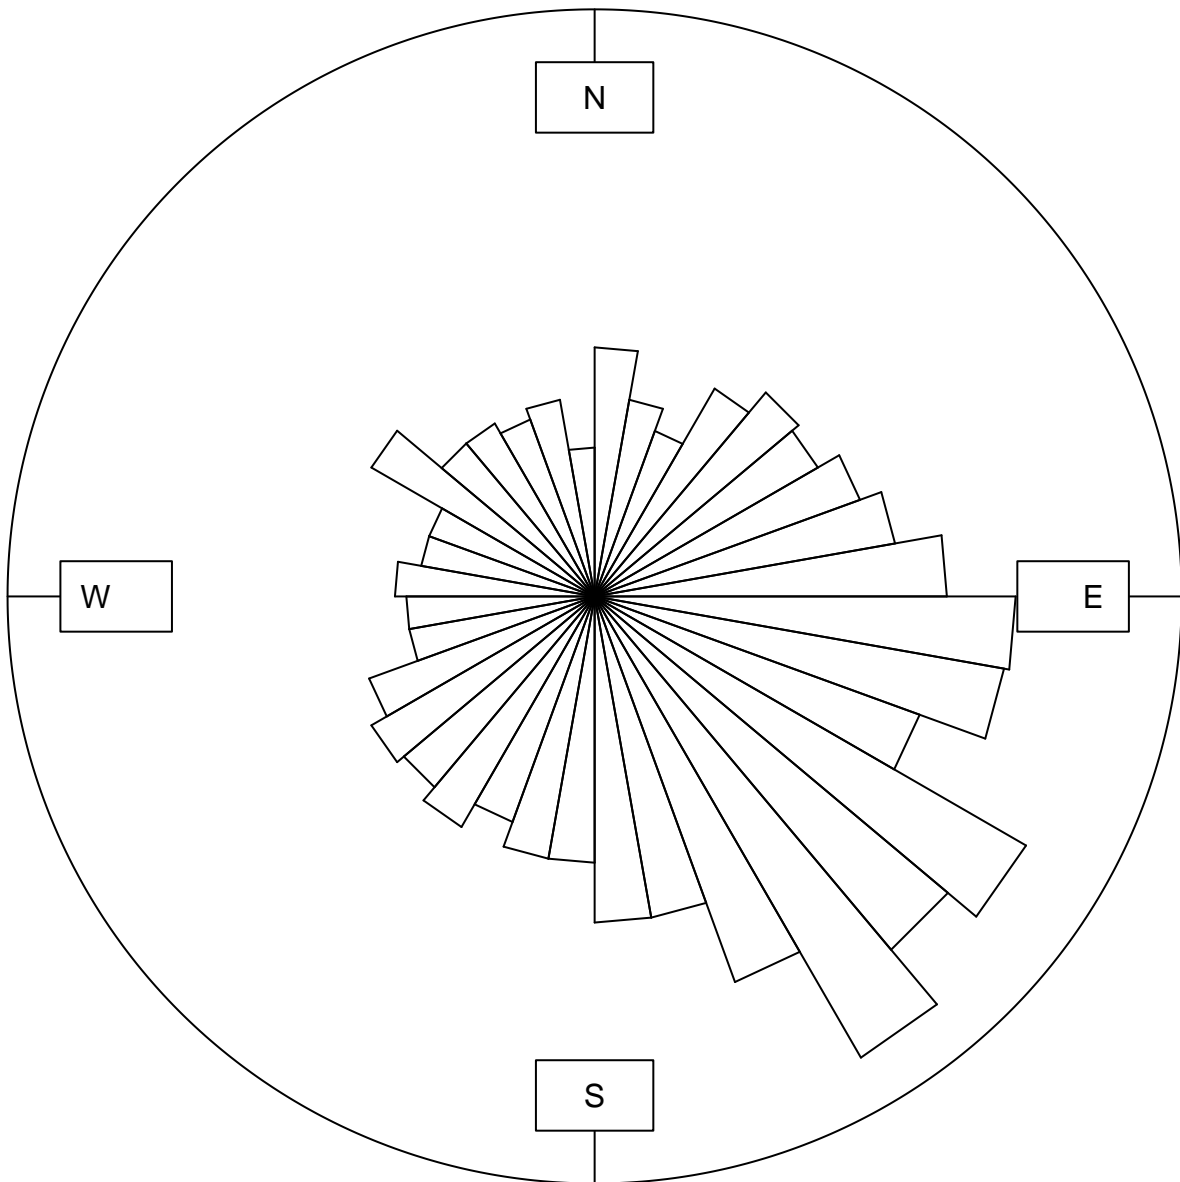

# bootstrap 885

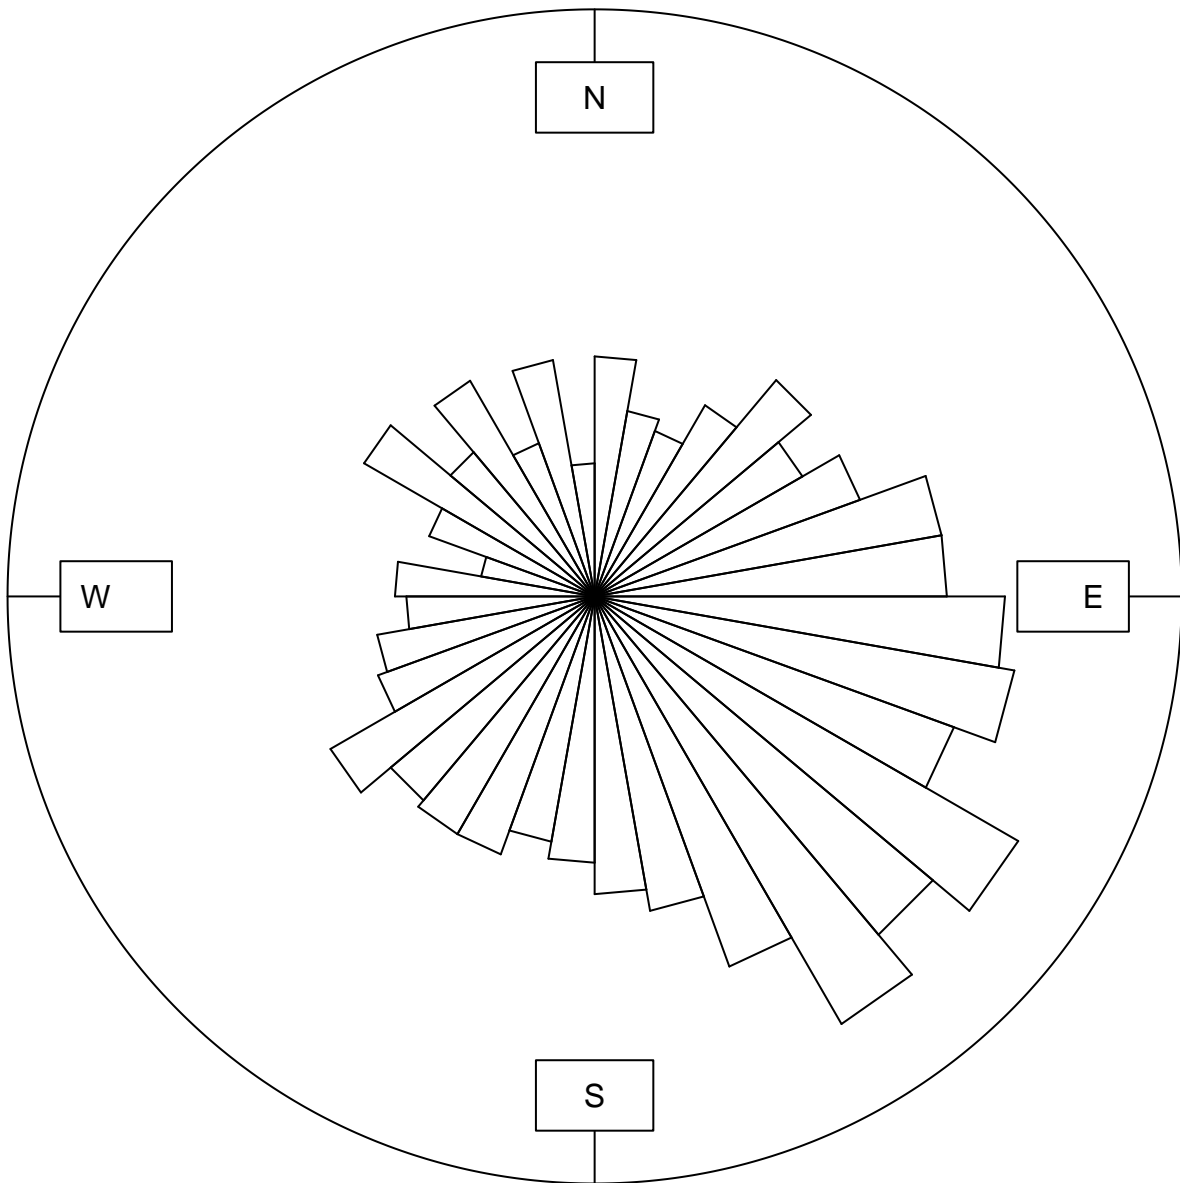

# bootstrap 886

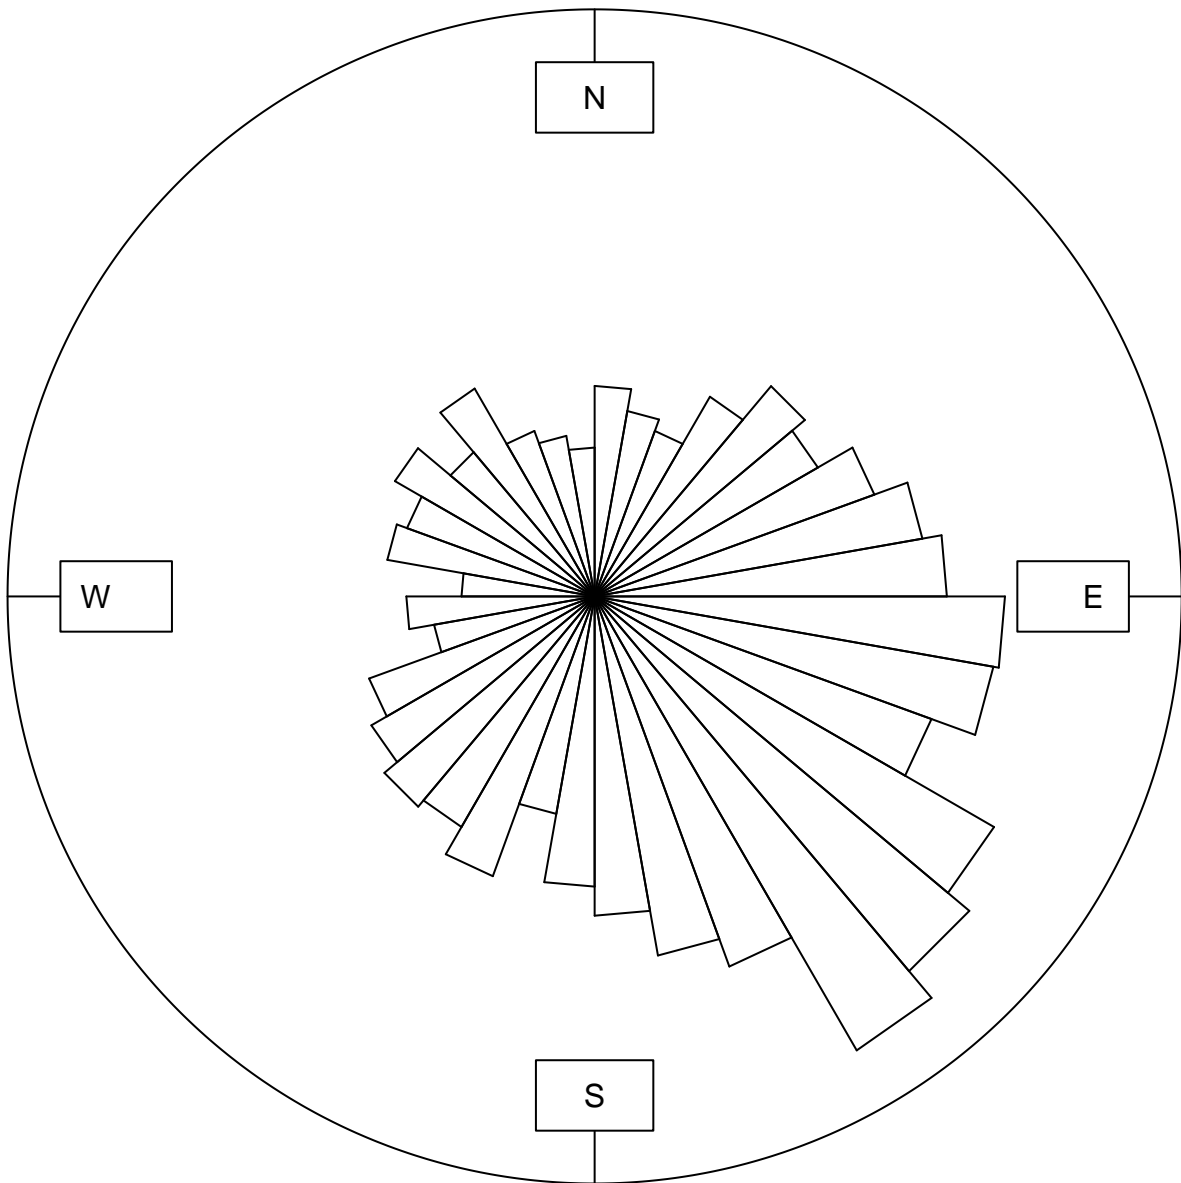

# bootstrap 887

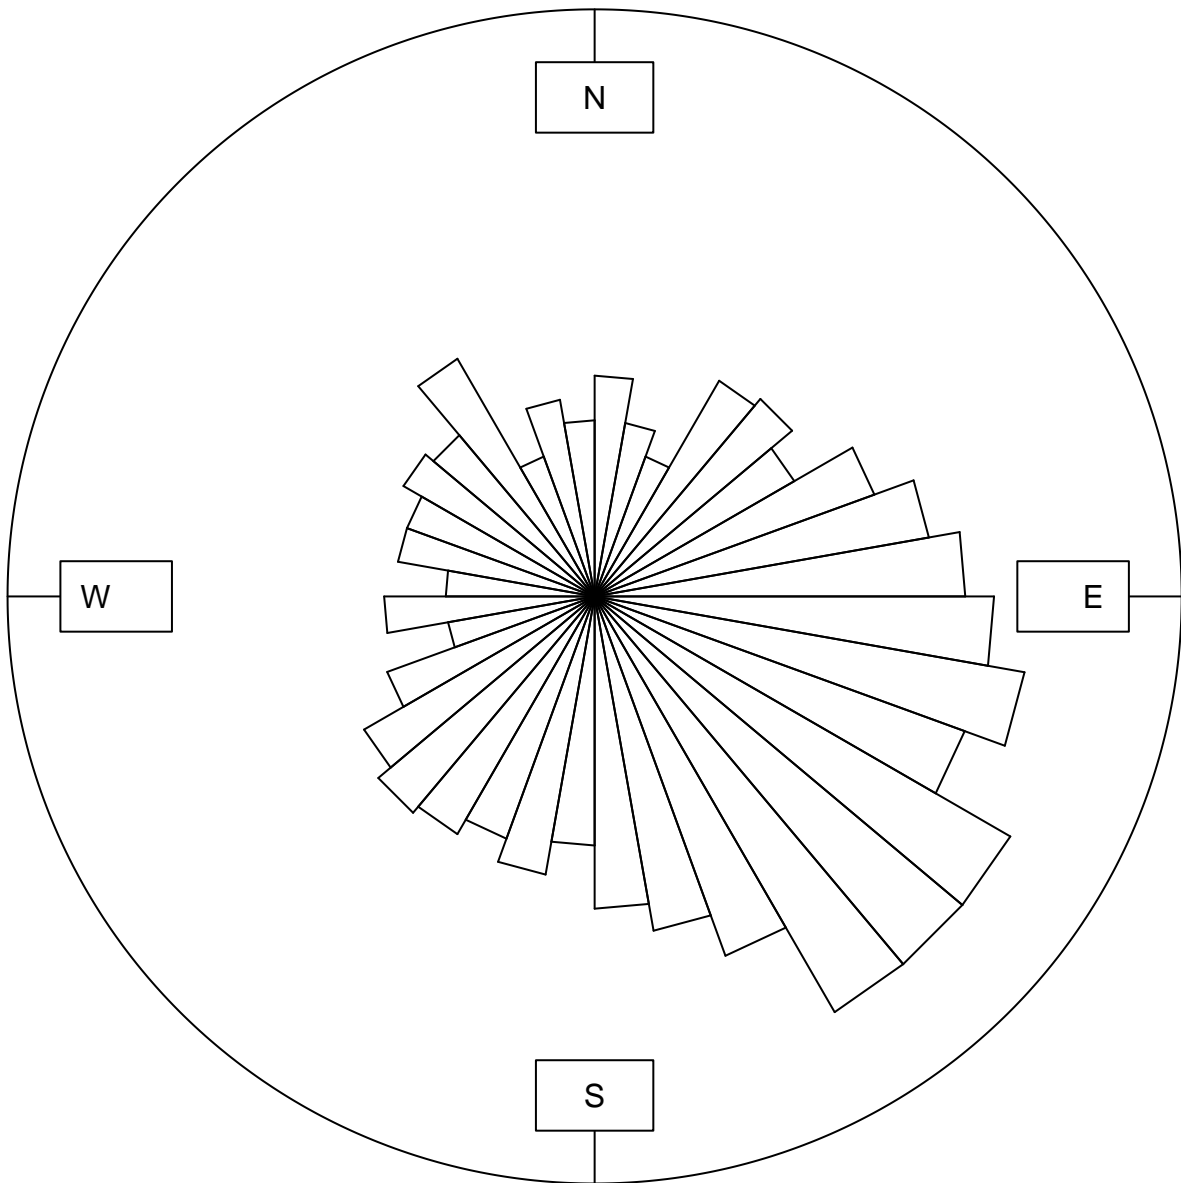

# bootstrap 888

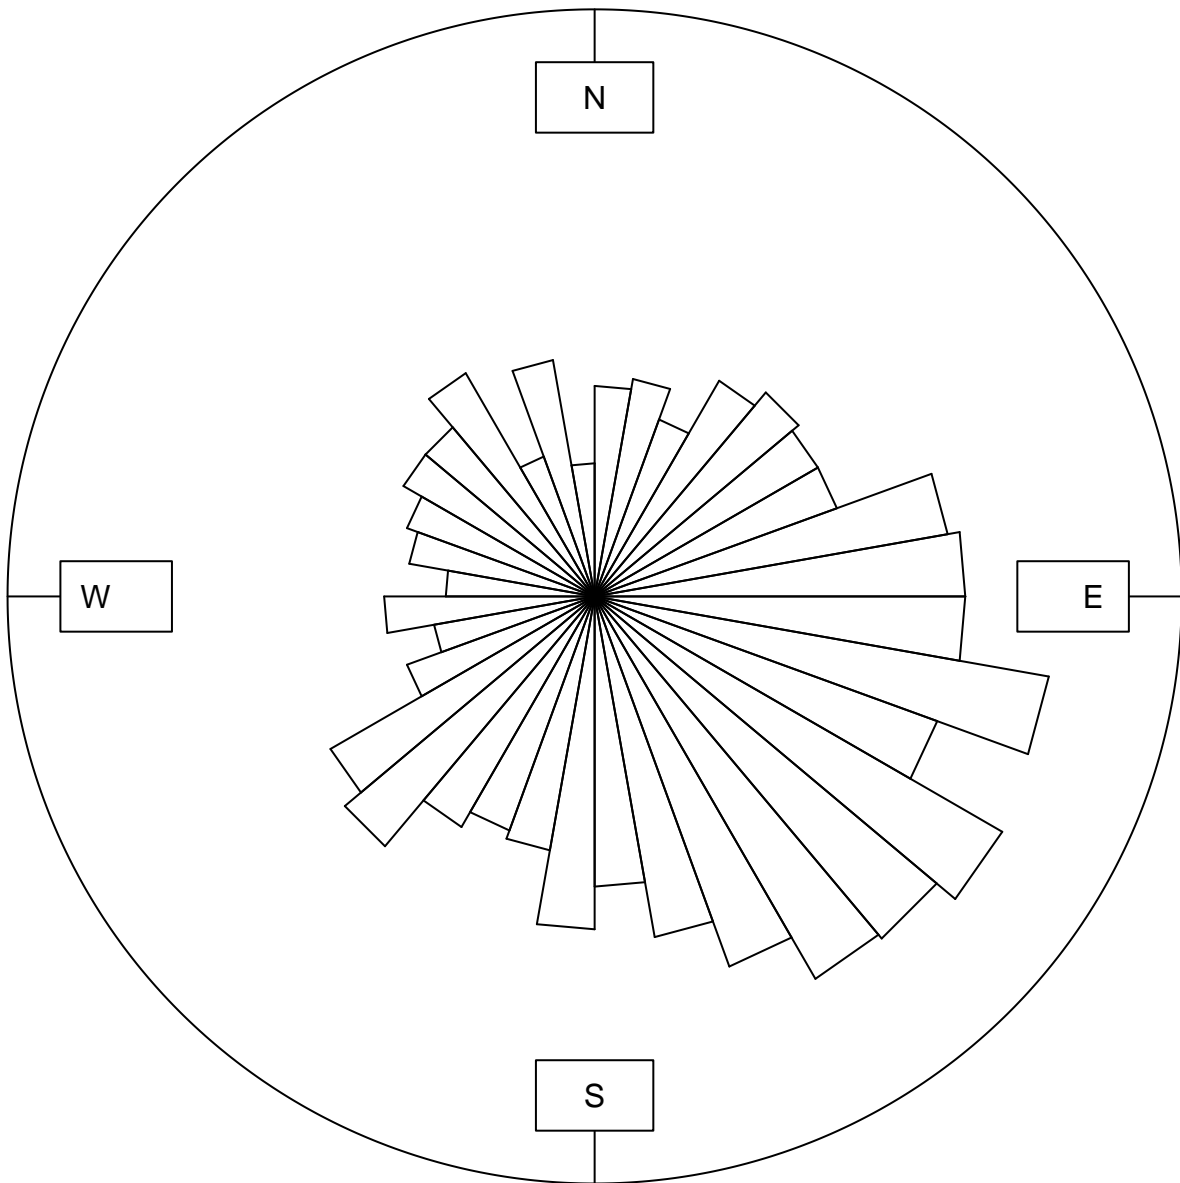



# bootstrap 889

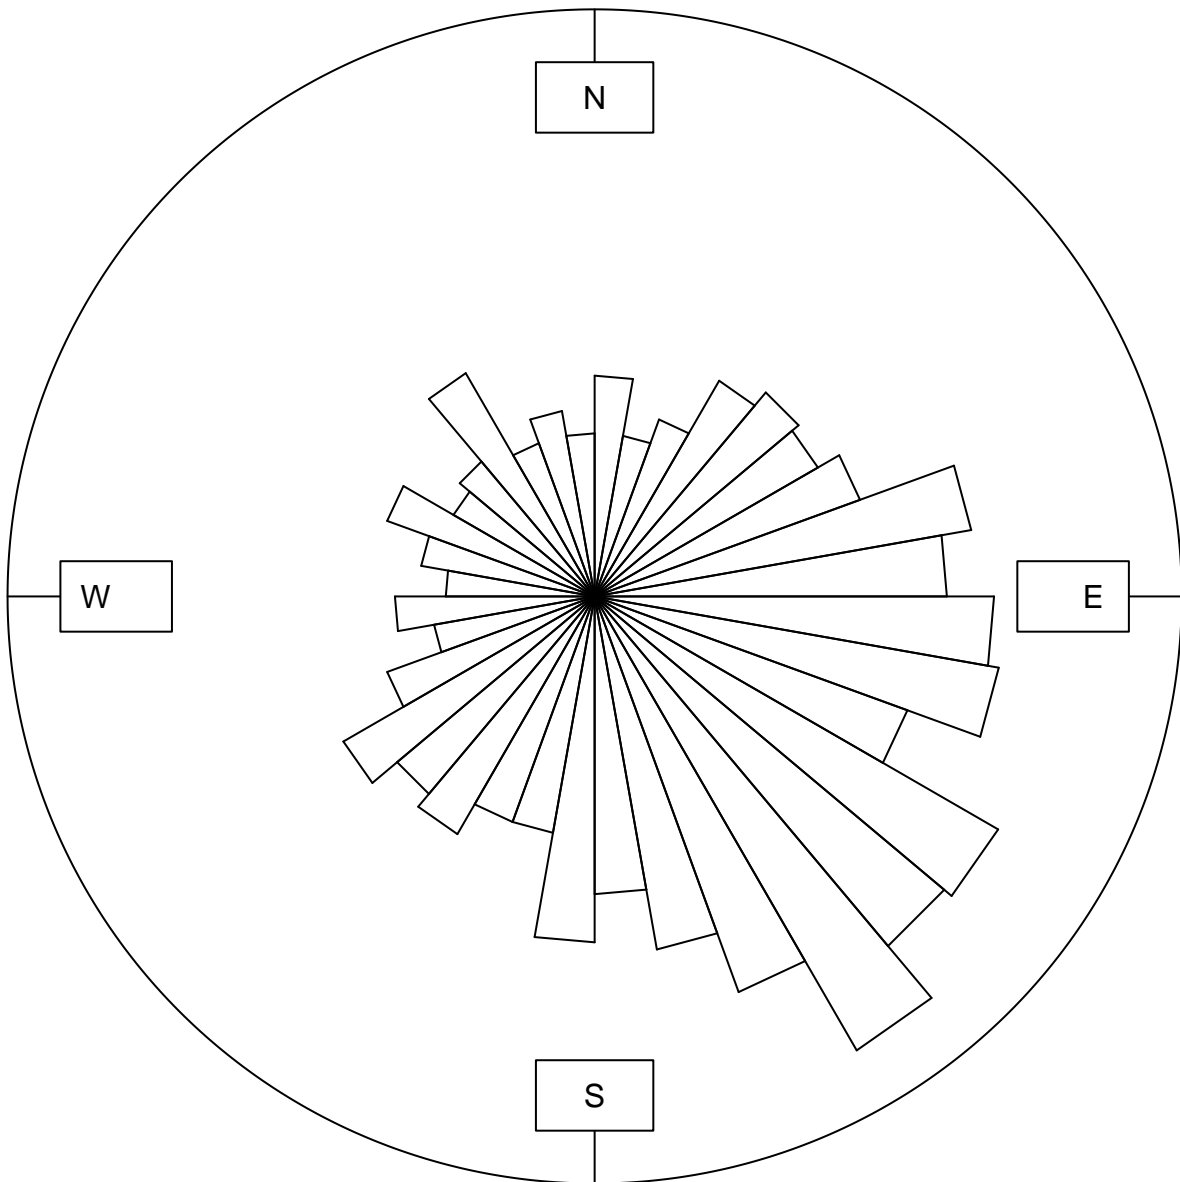

# bootstrap 890

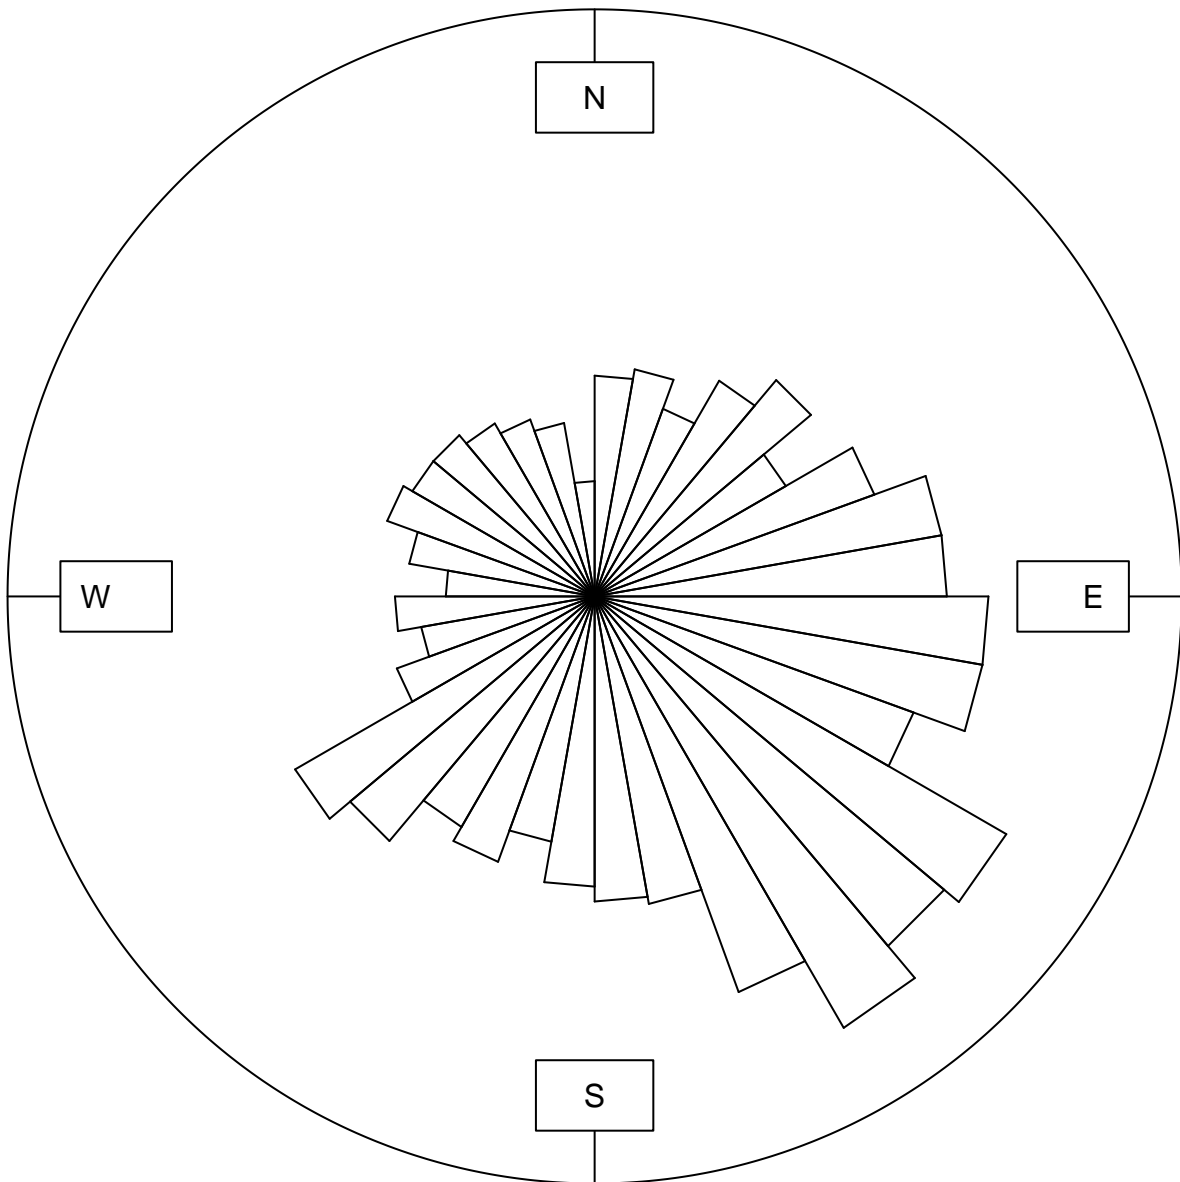

# bootstrap 891

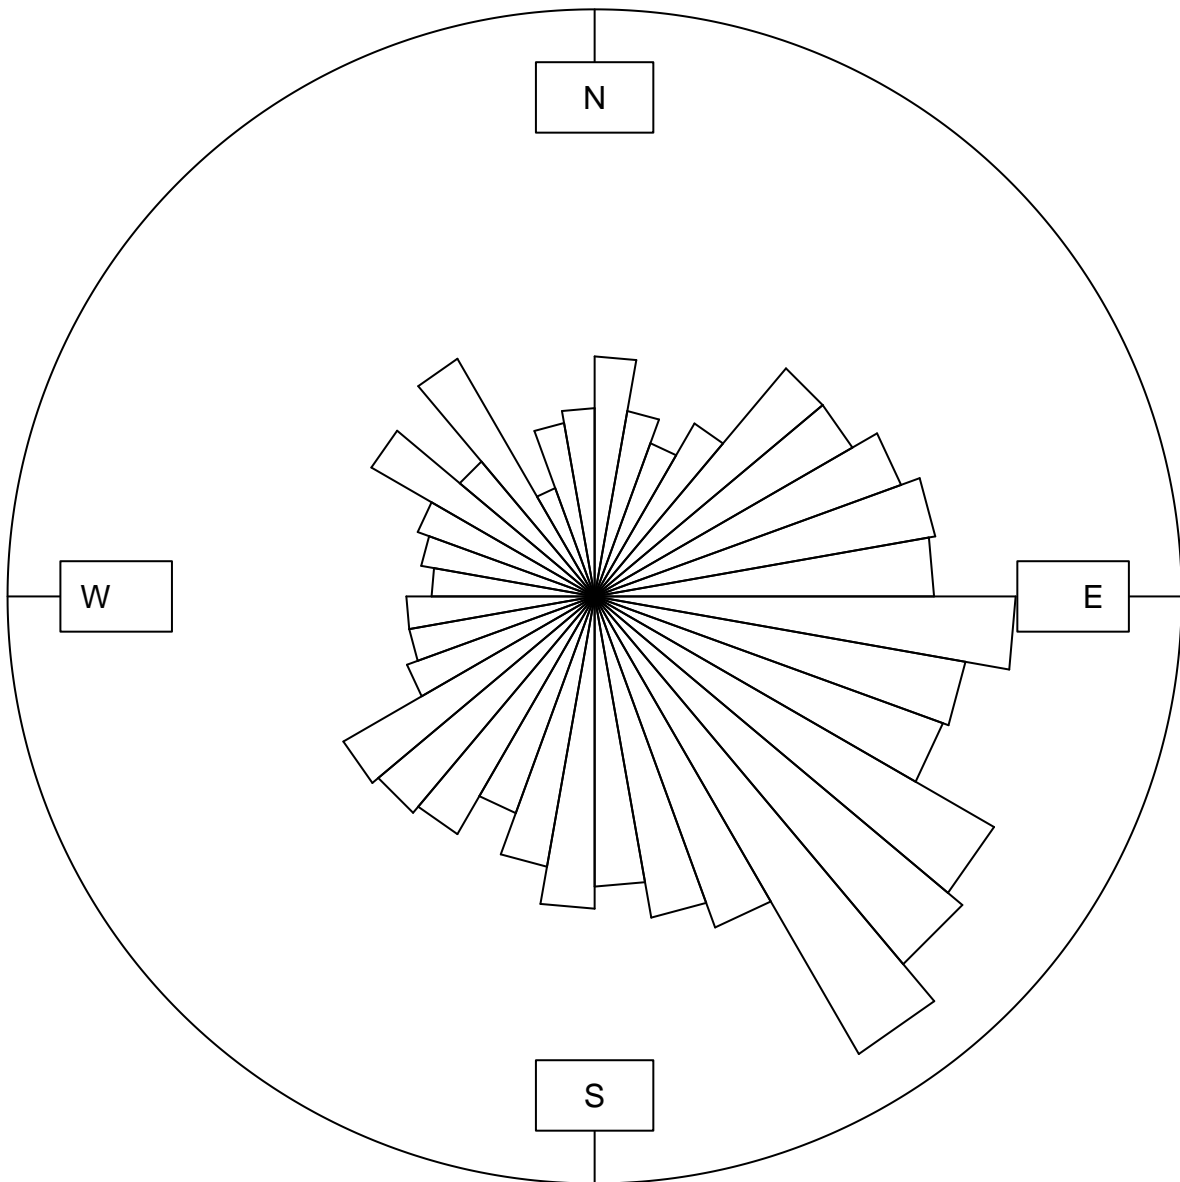

**bootstrap 892**

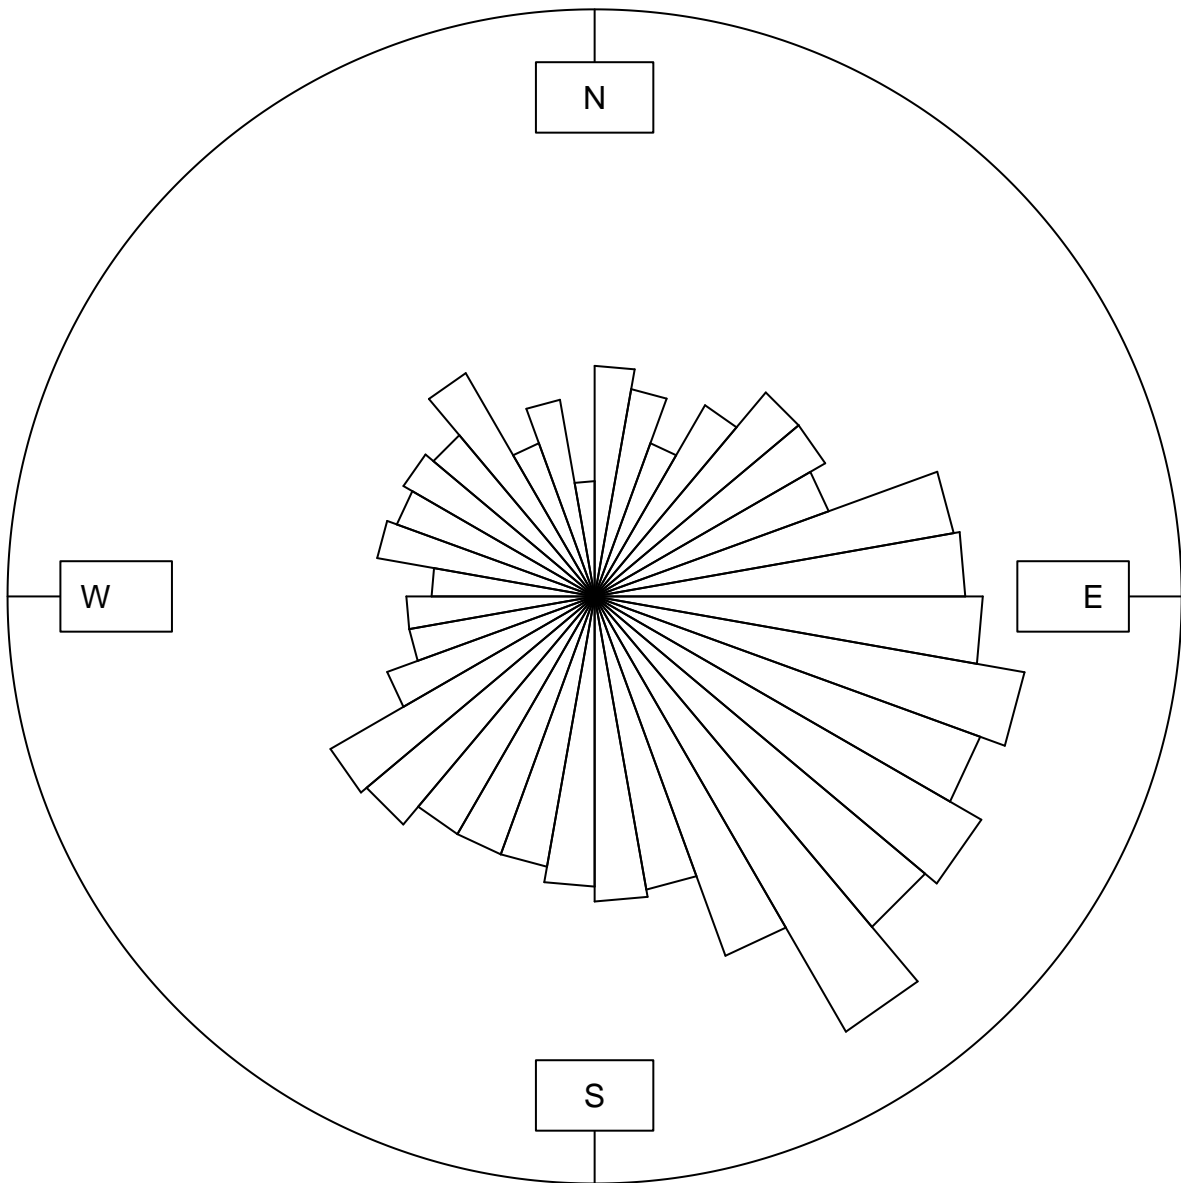

**bootstrap 893**

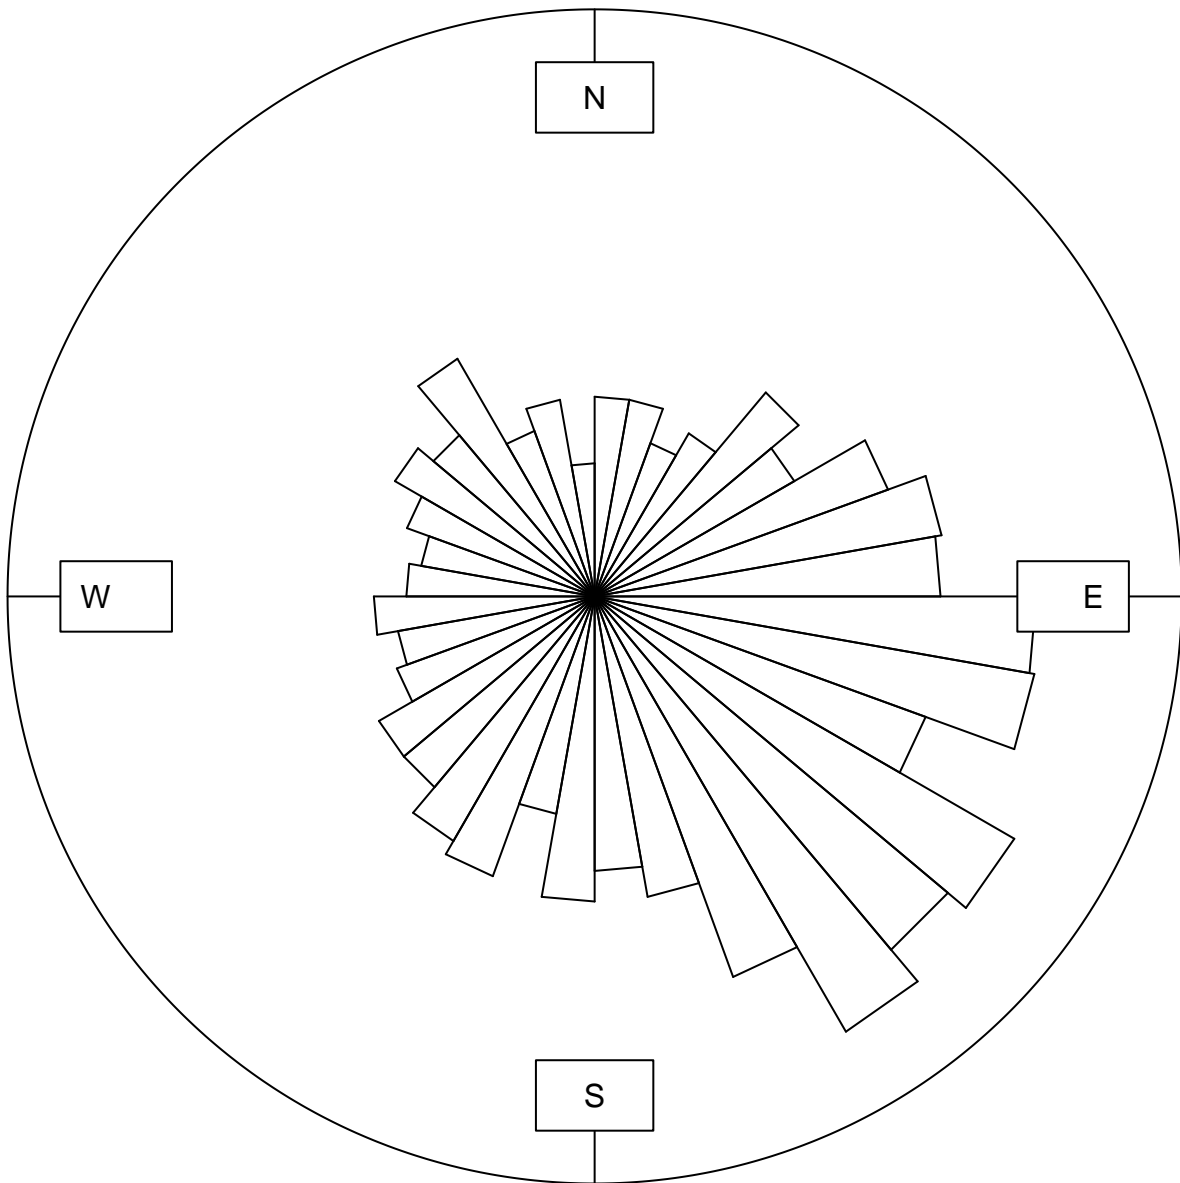

**bootstrap 894**

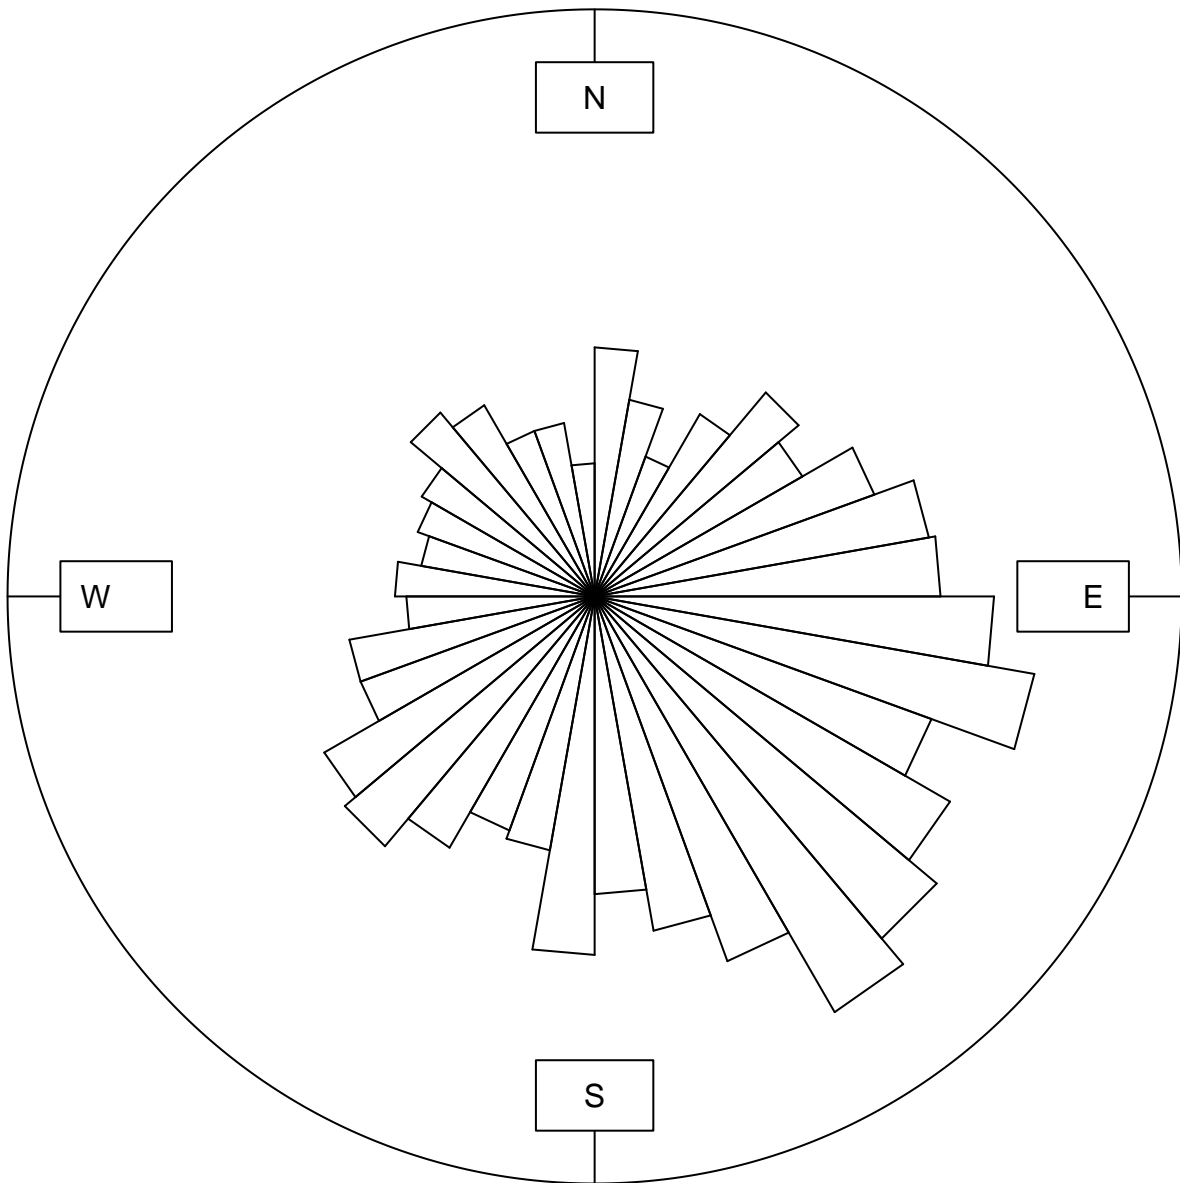

# bootstrap 895

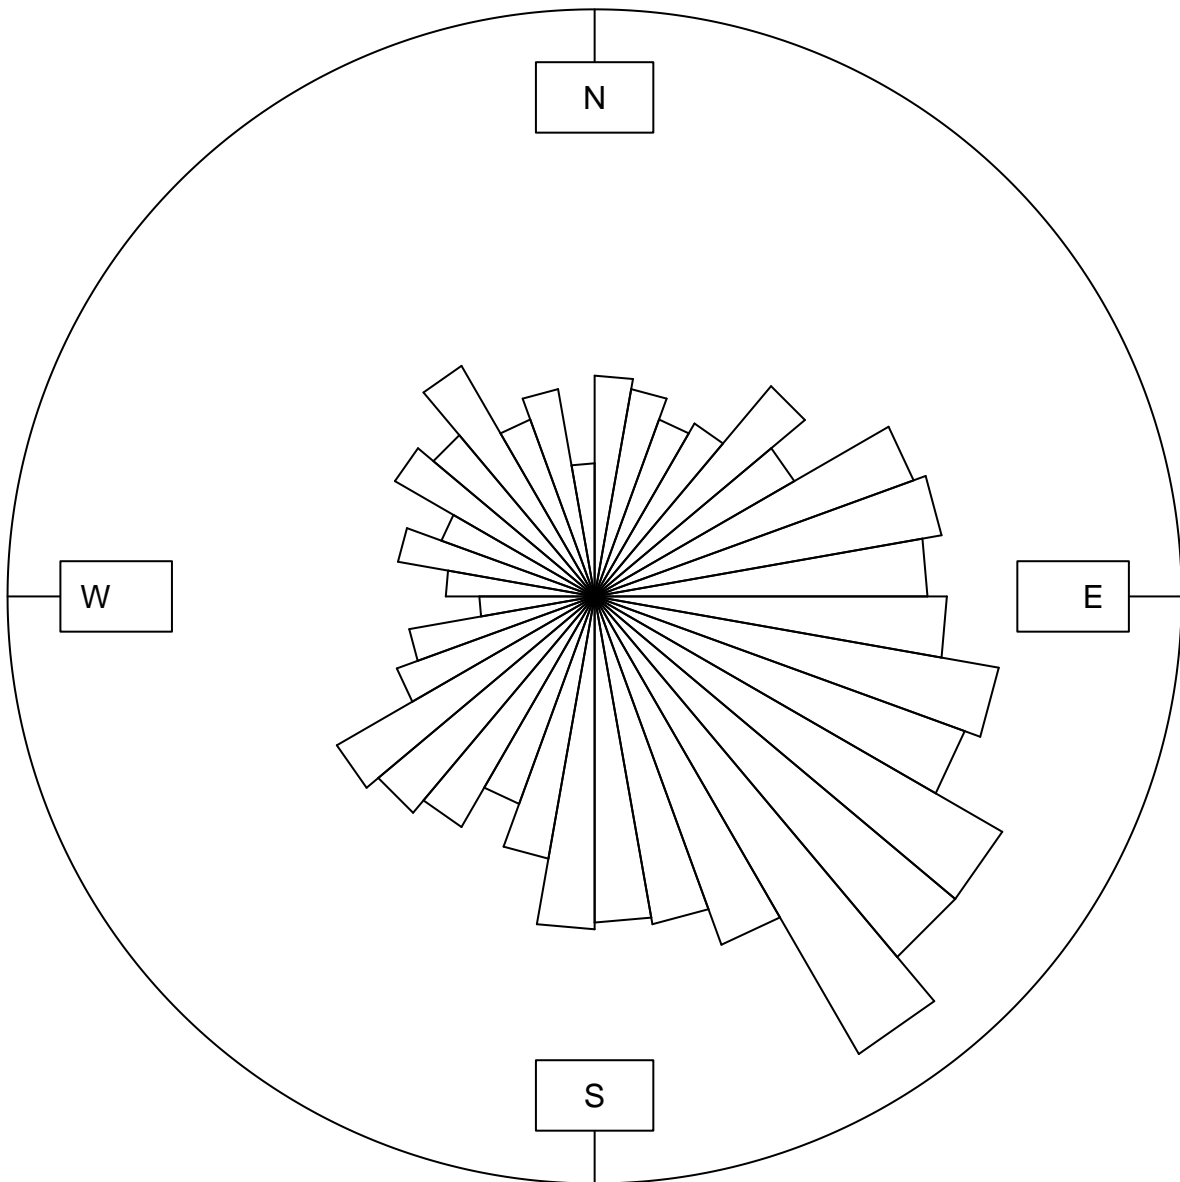

**bootstrap 896**

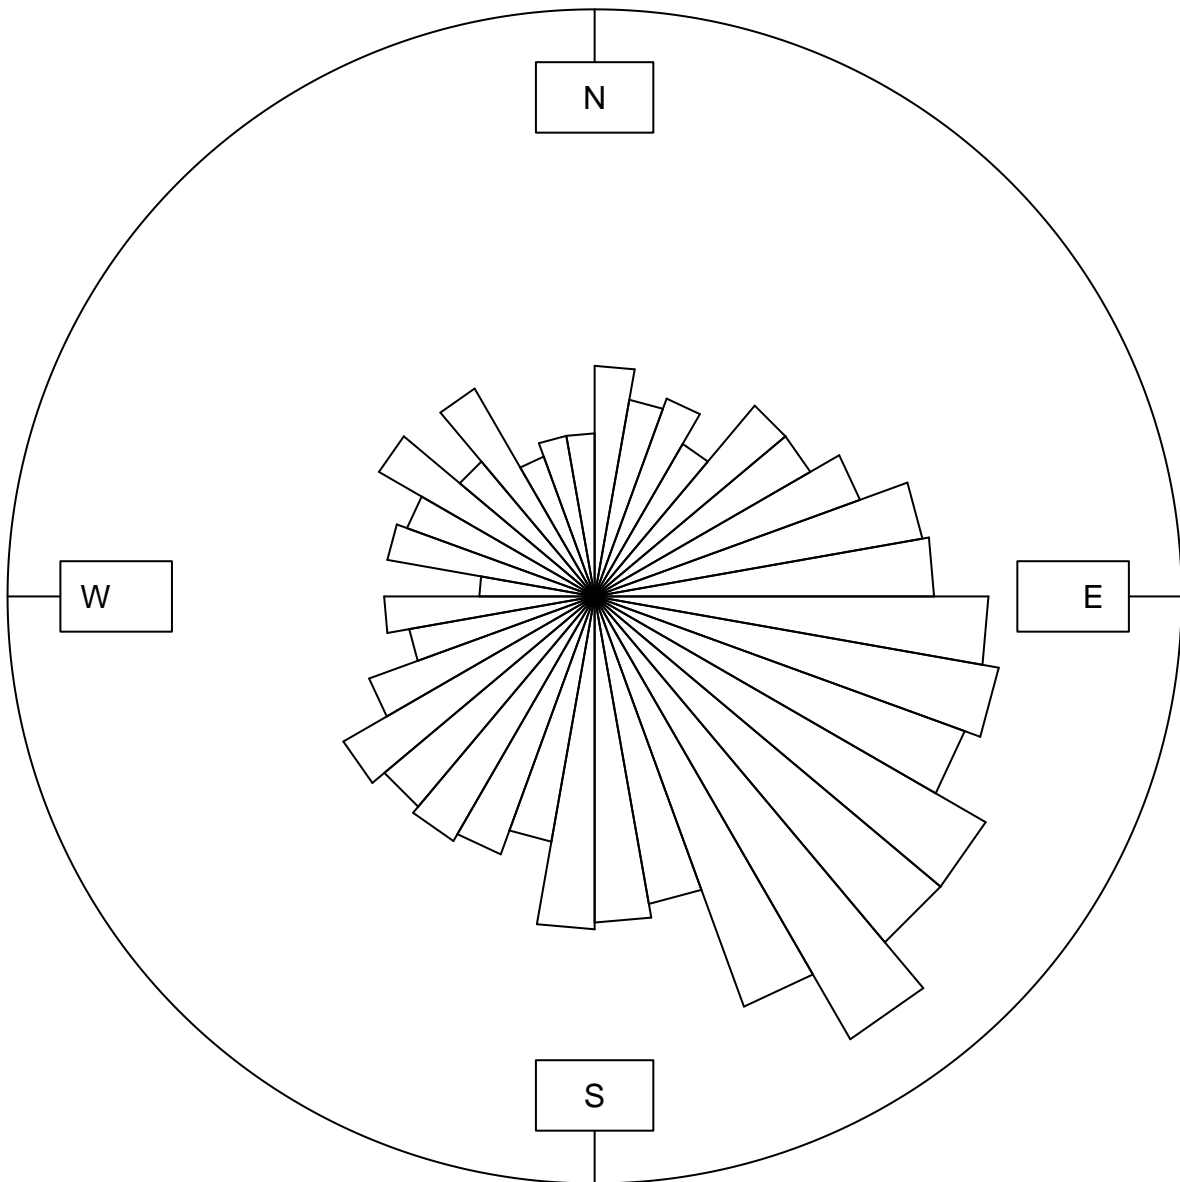



# bootstrap 897

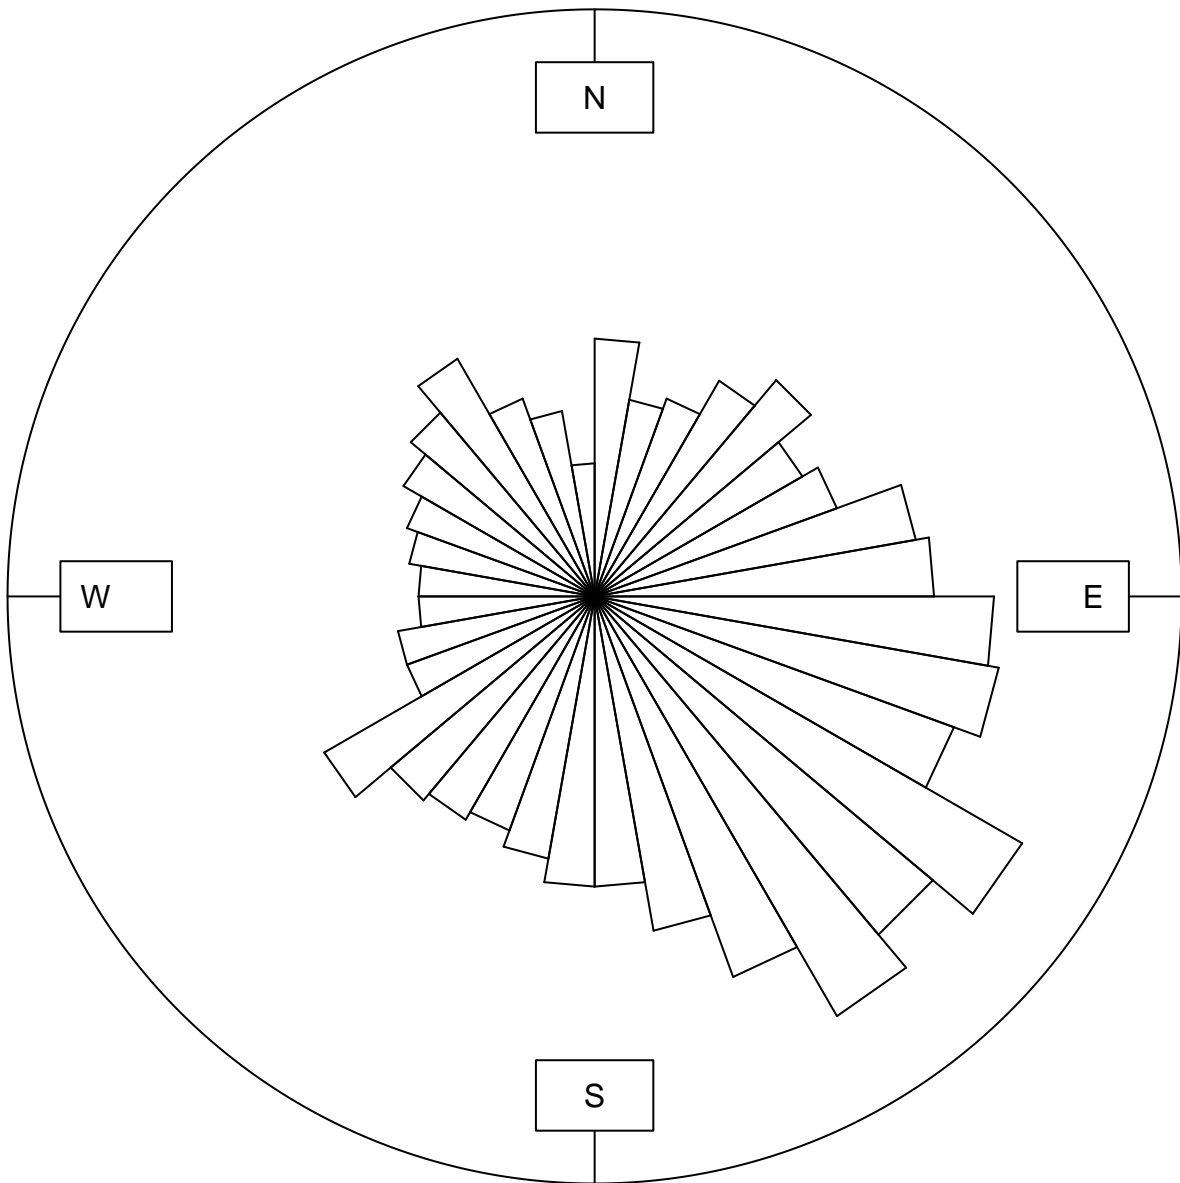

**bootstrap 898**

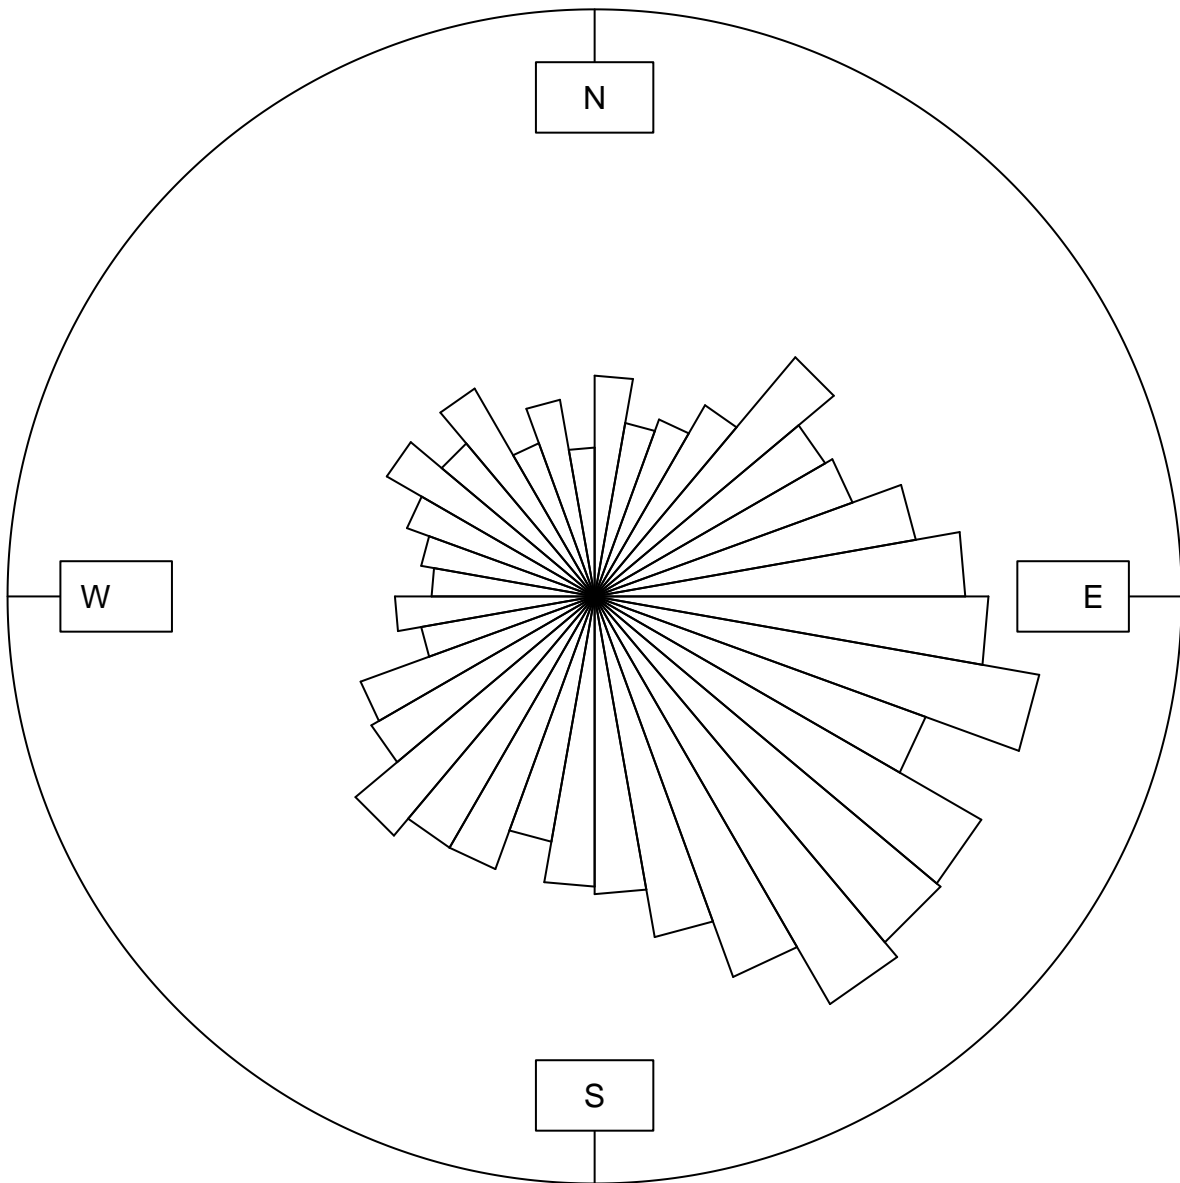

# bootstrap 899

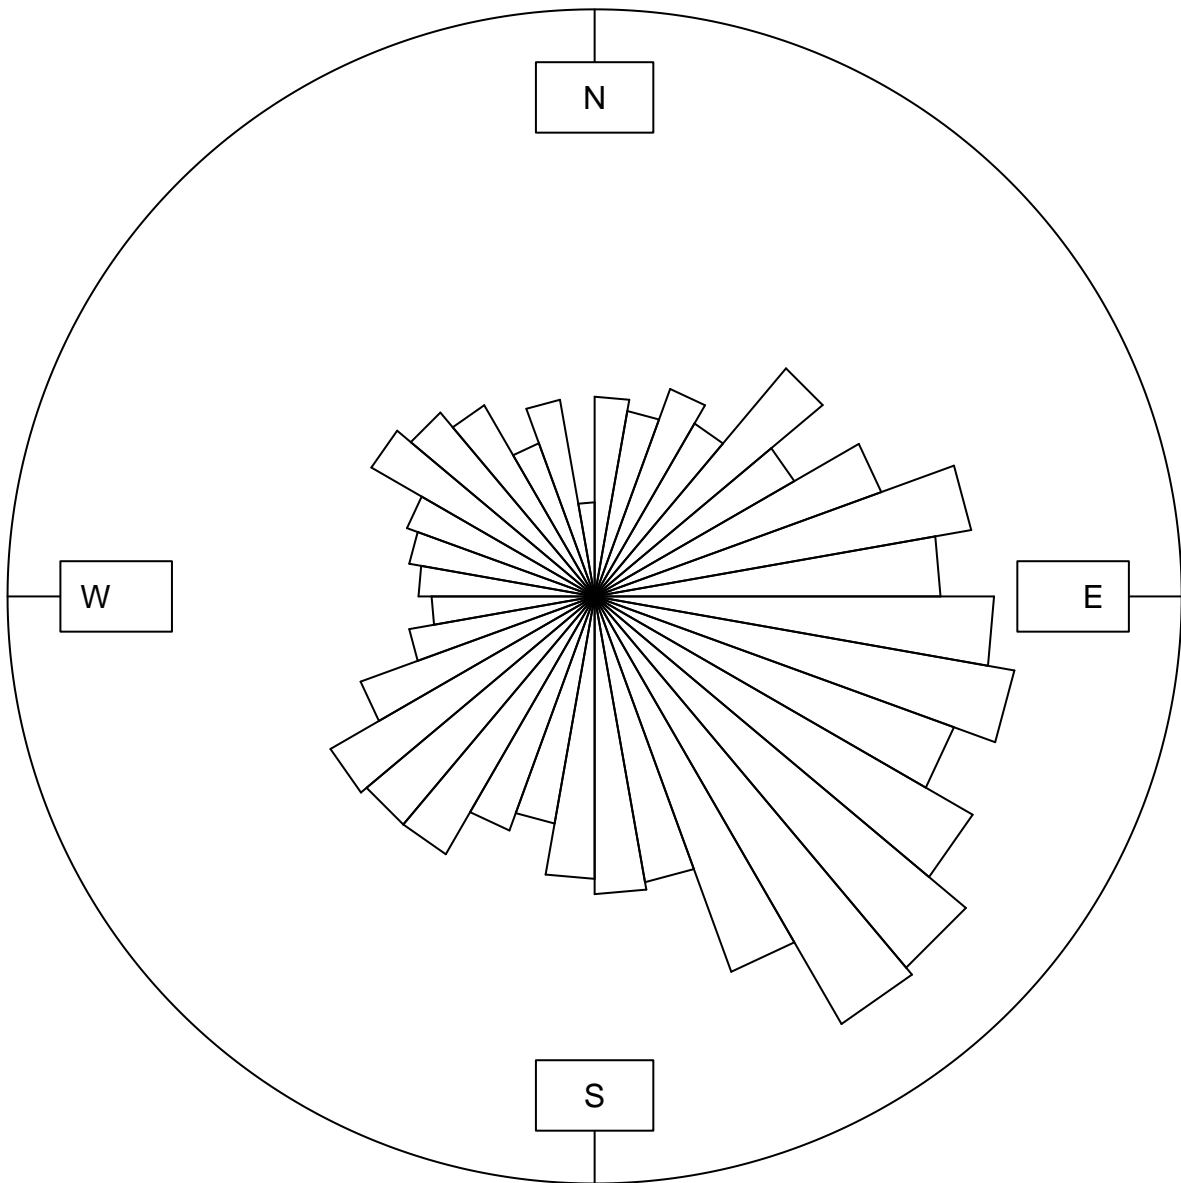

**bootstrap 900**

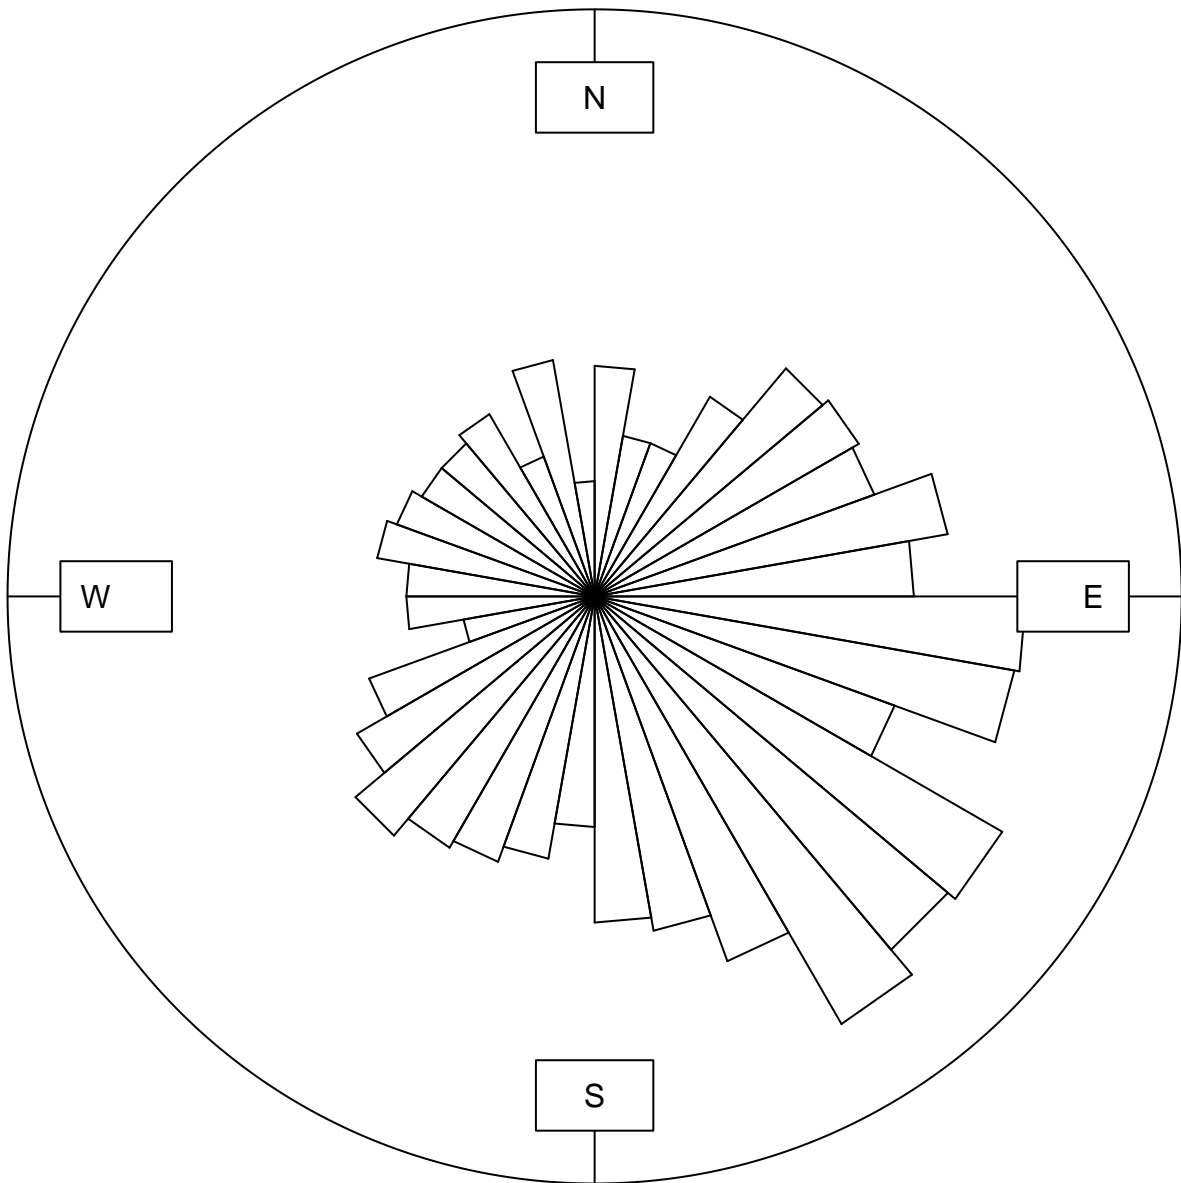

# bootstrap 901

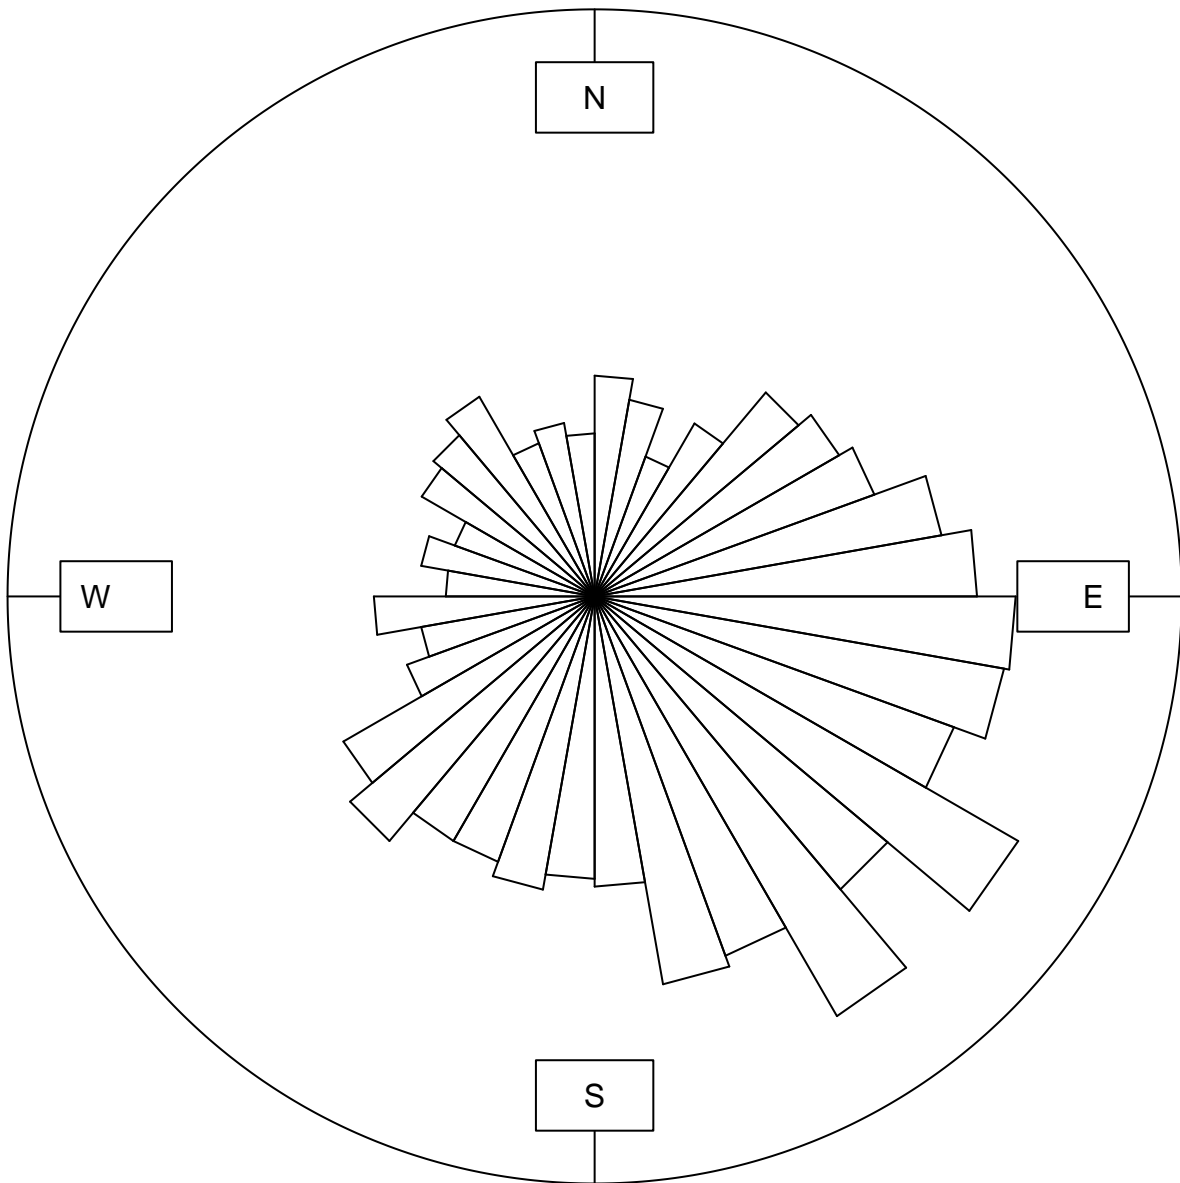

# bootstrap 902

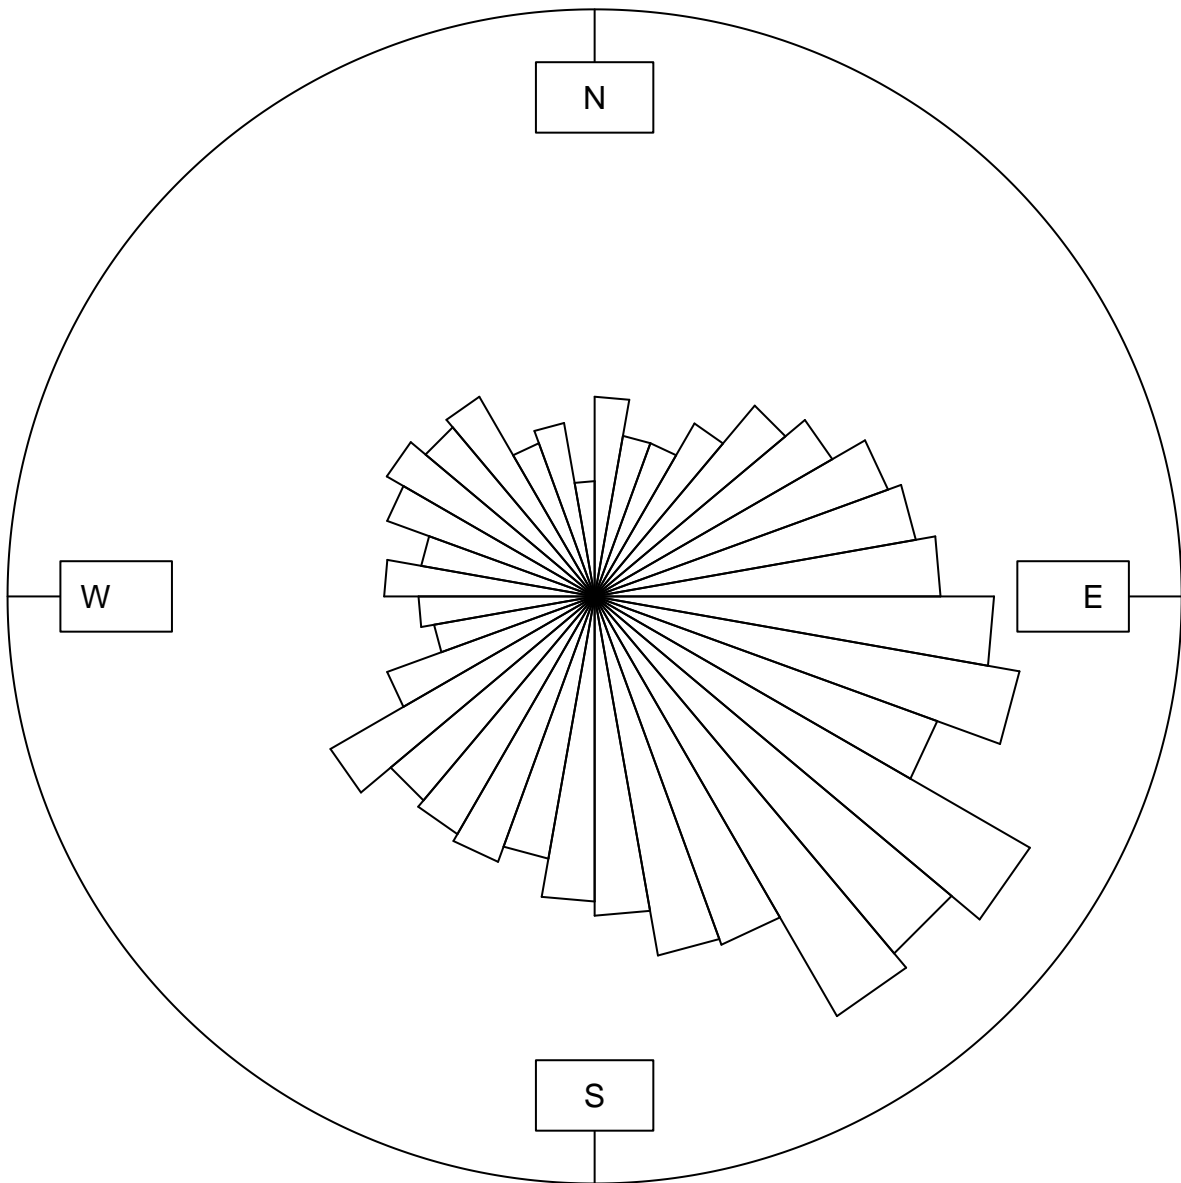

# bootstrap 903

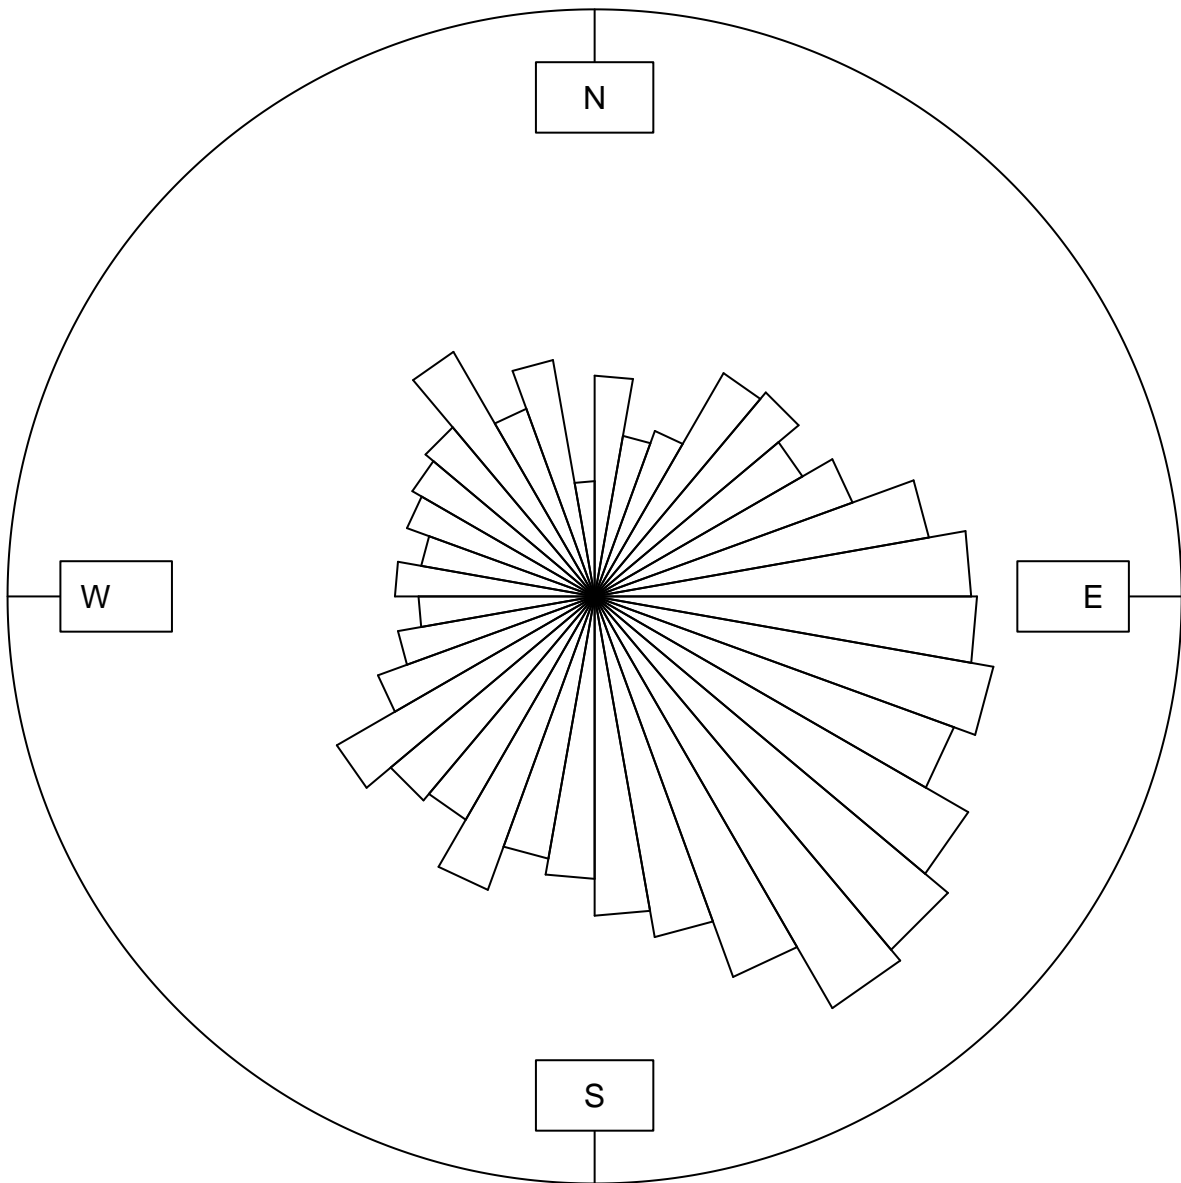

# bootstrap 904

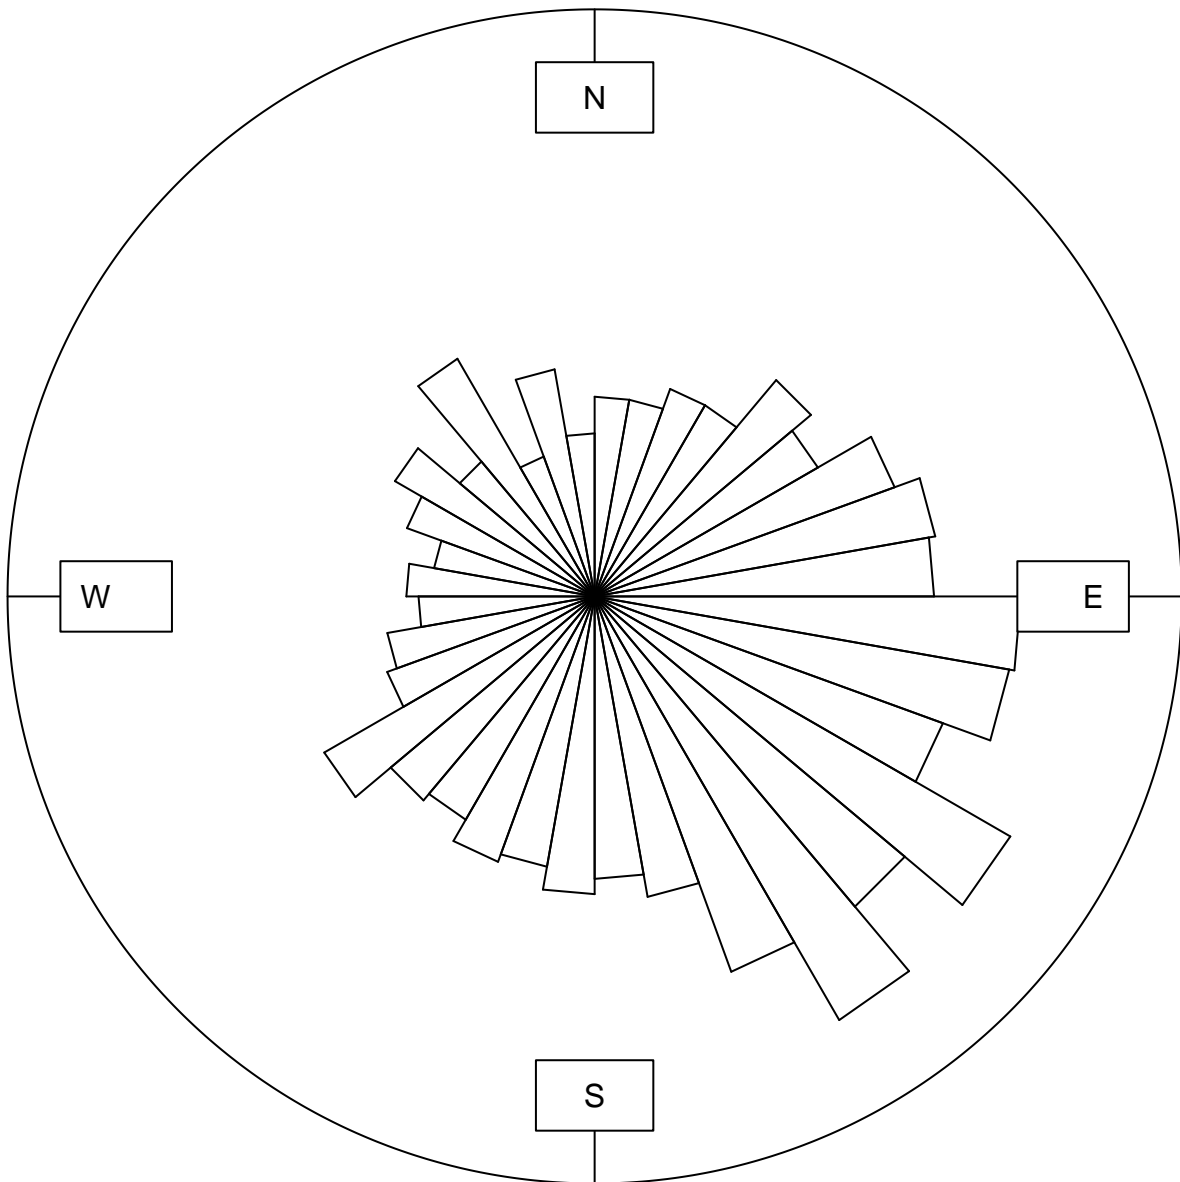



# bootstrap 905

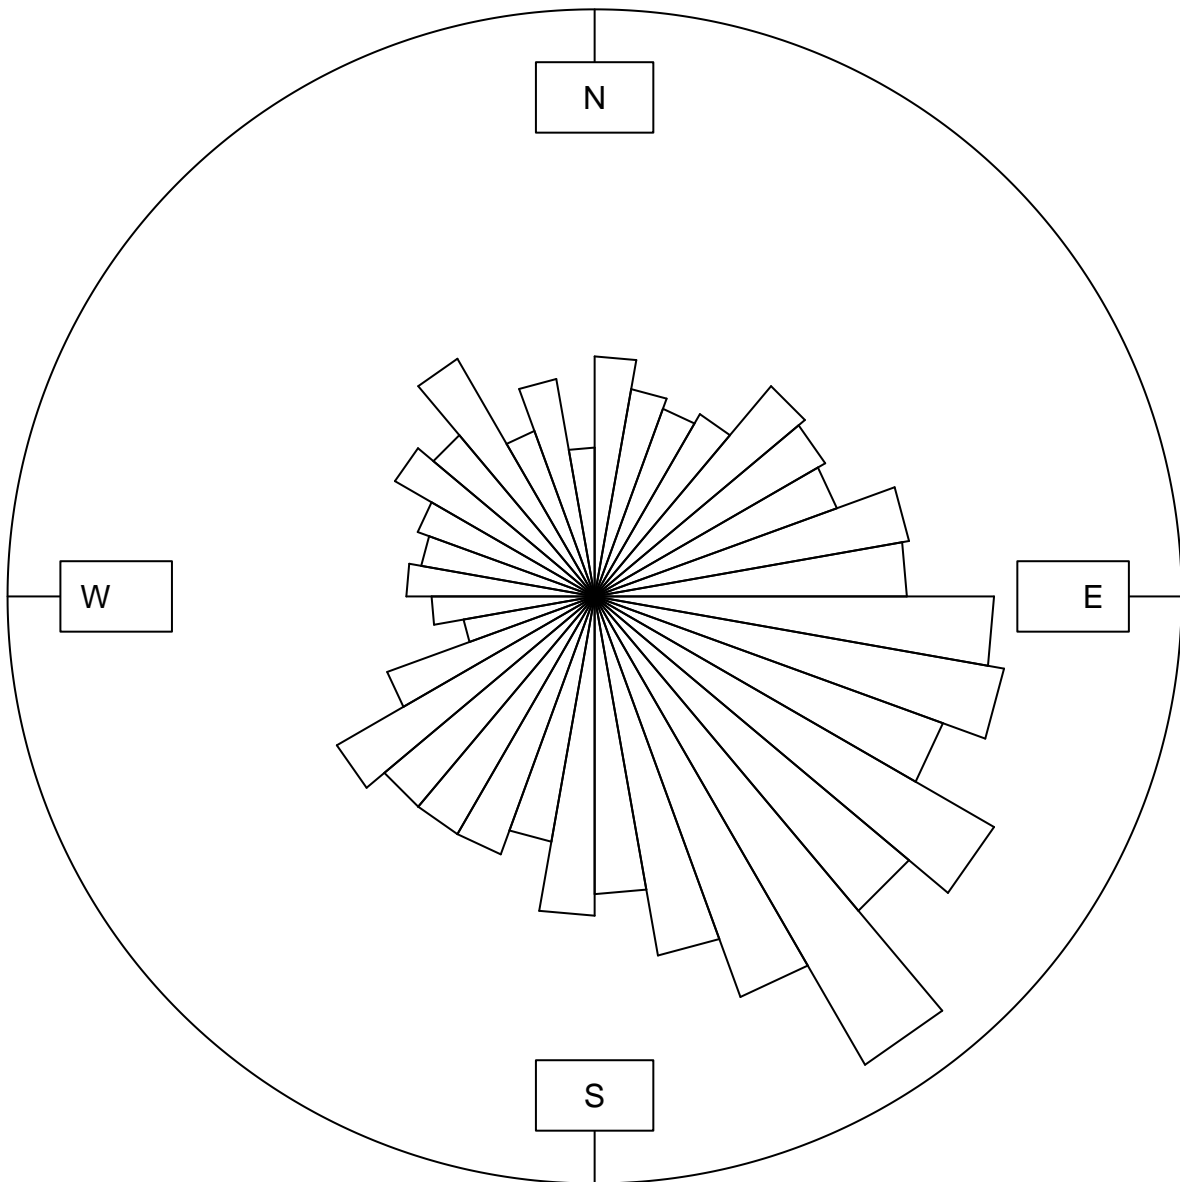

# bootstrap 906

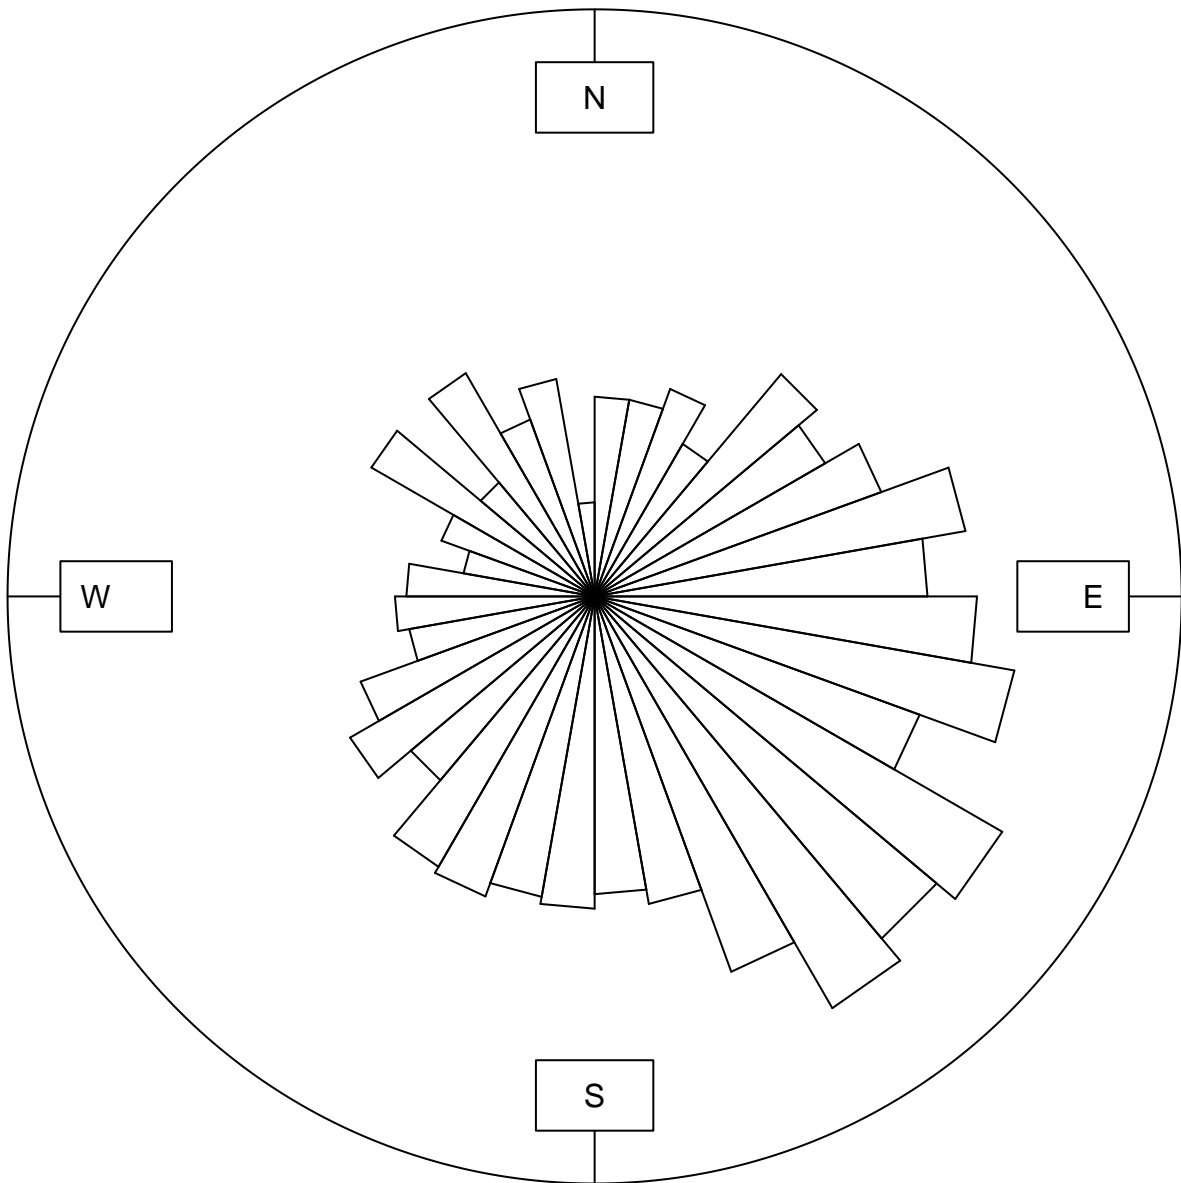

# bootstrap 907

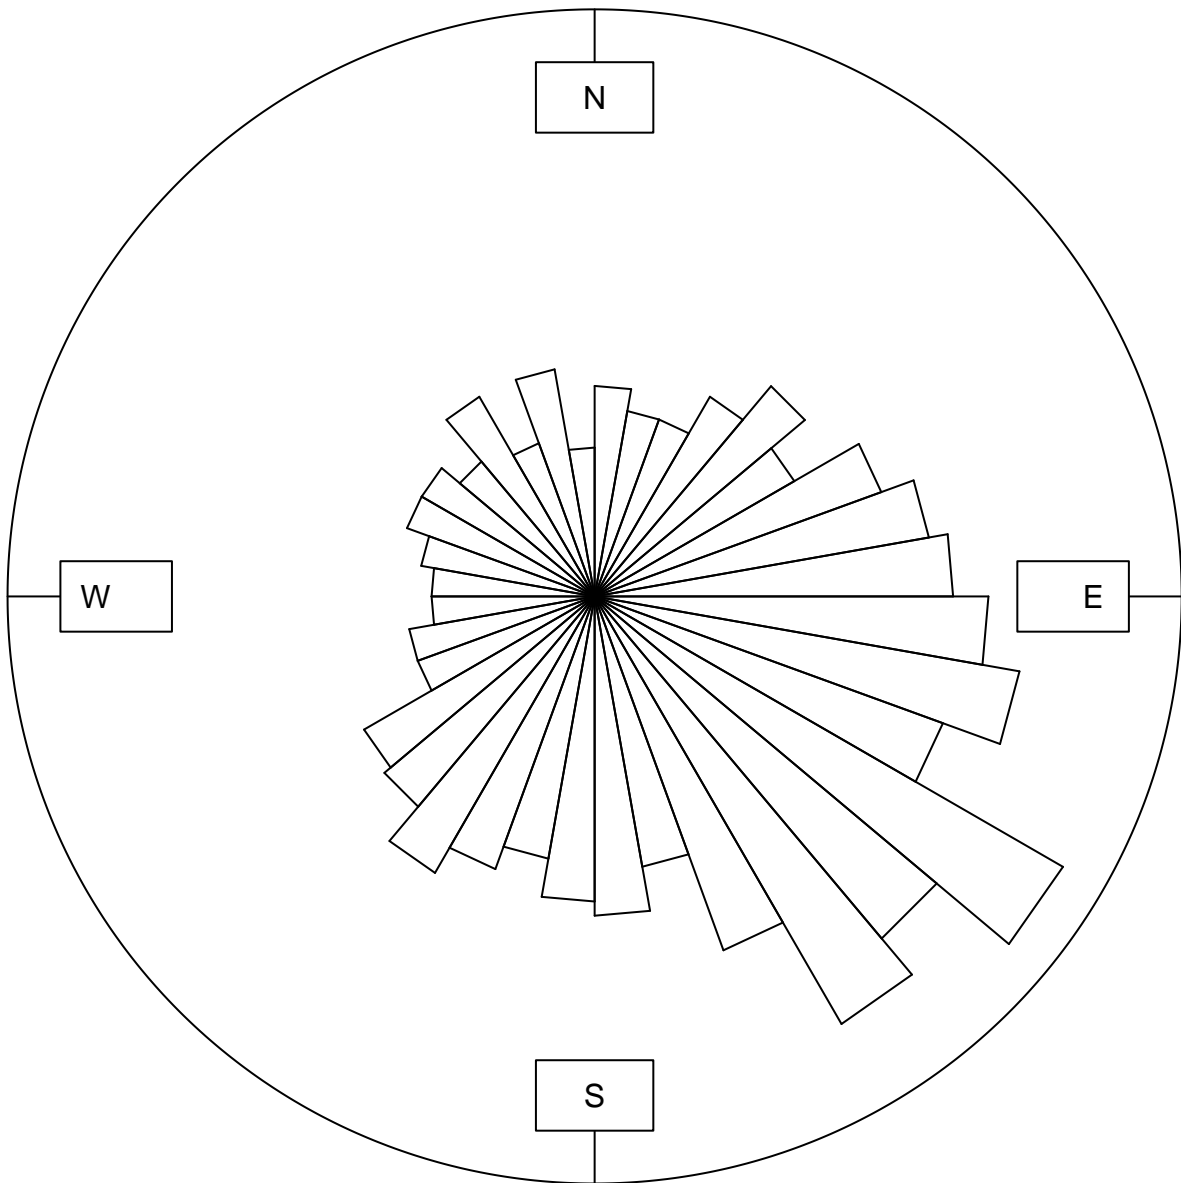

# bootstrap 908

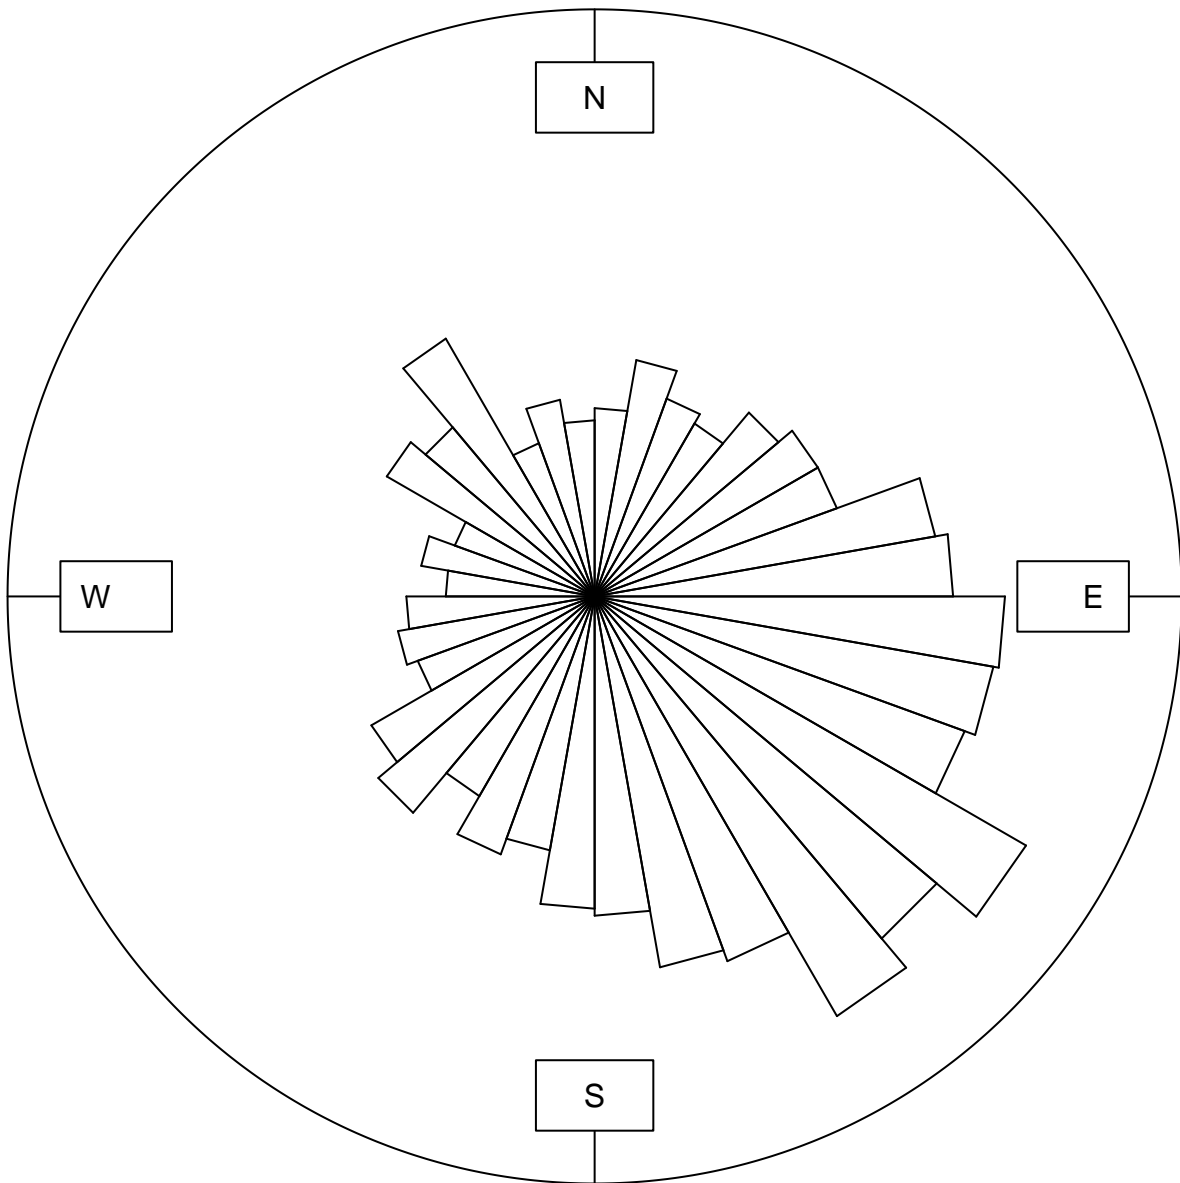

# bootstrap 909

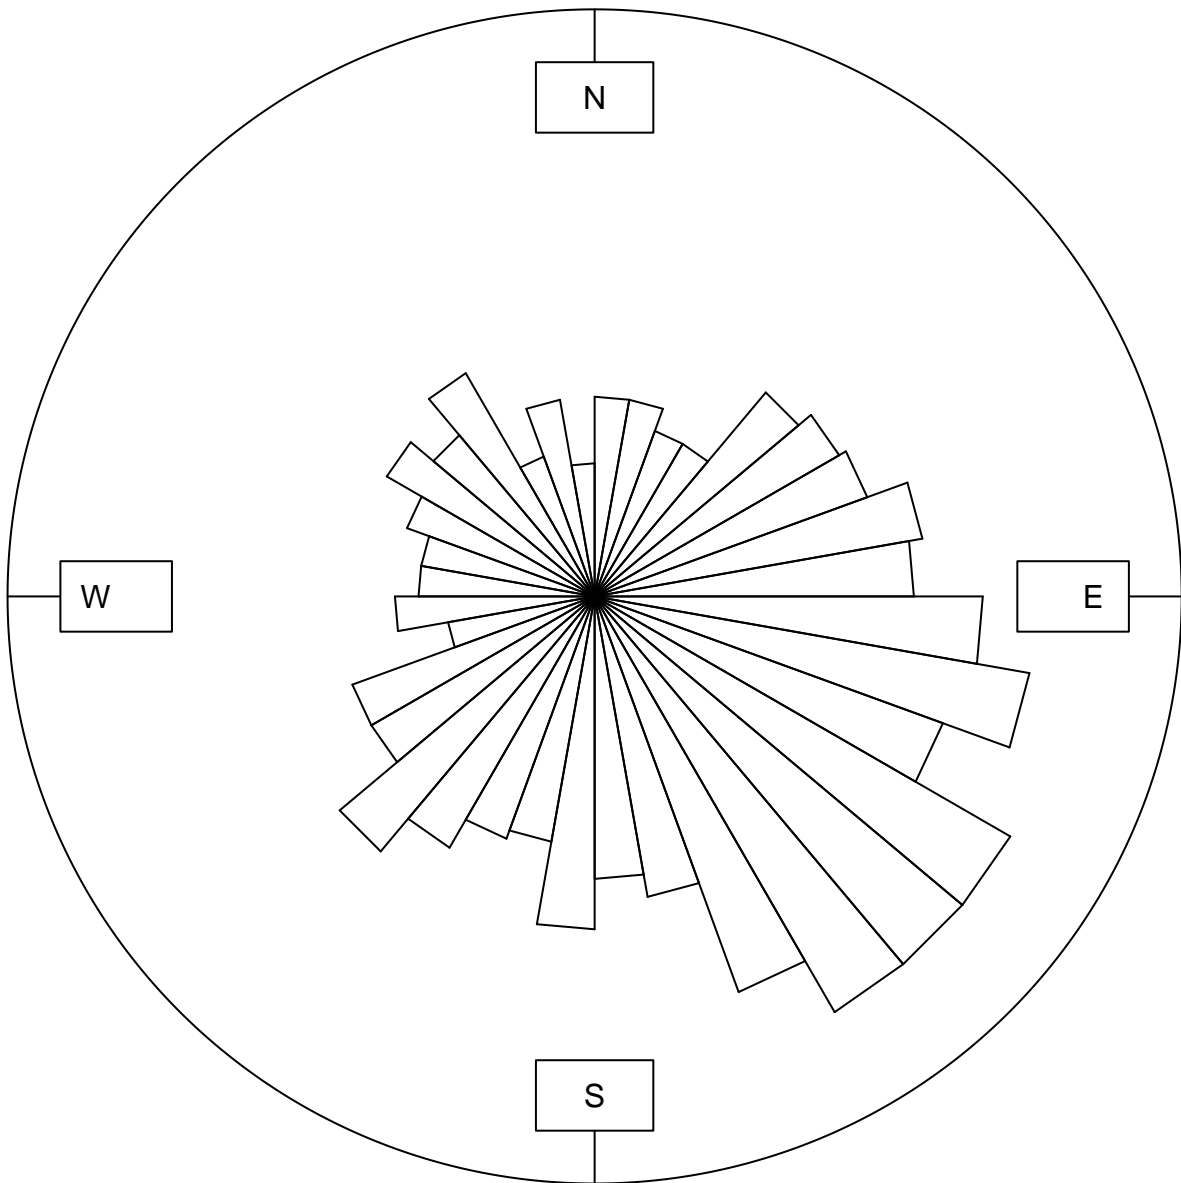

# bootstrap 910

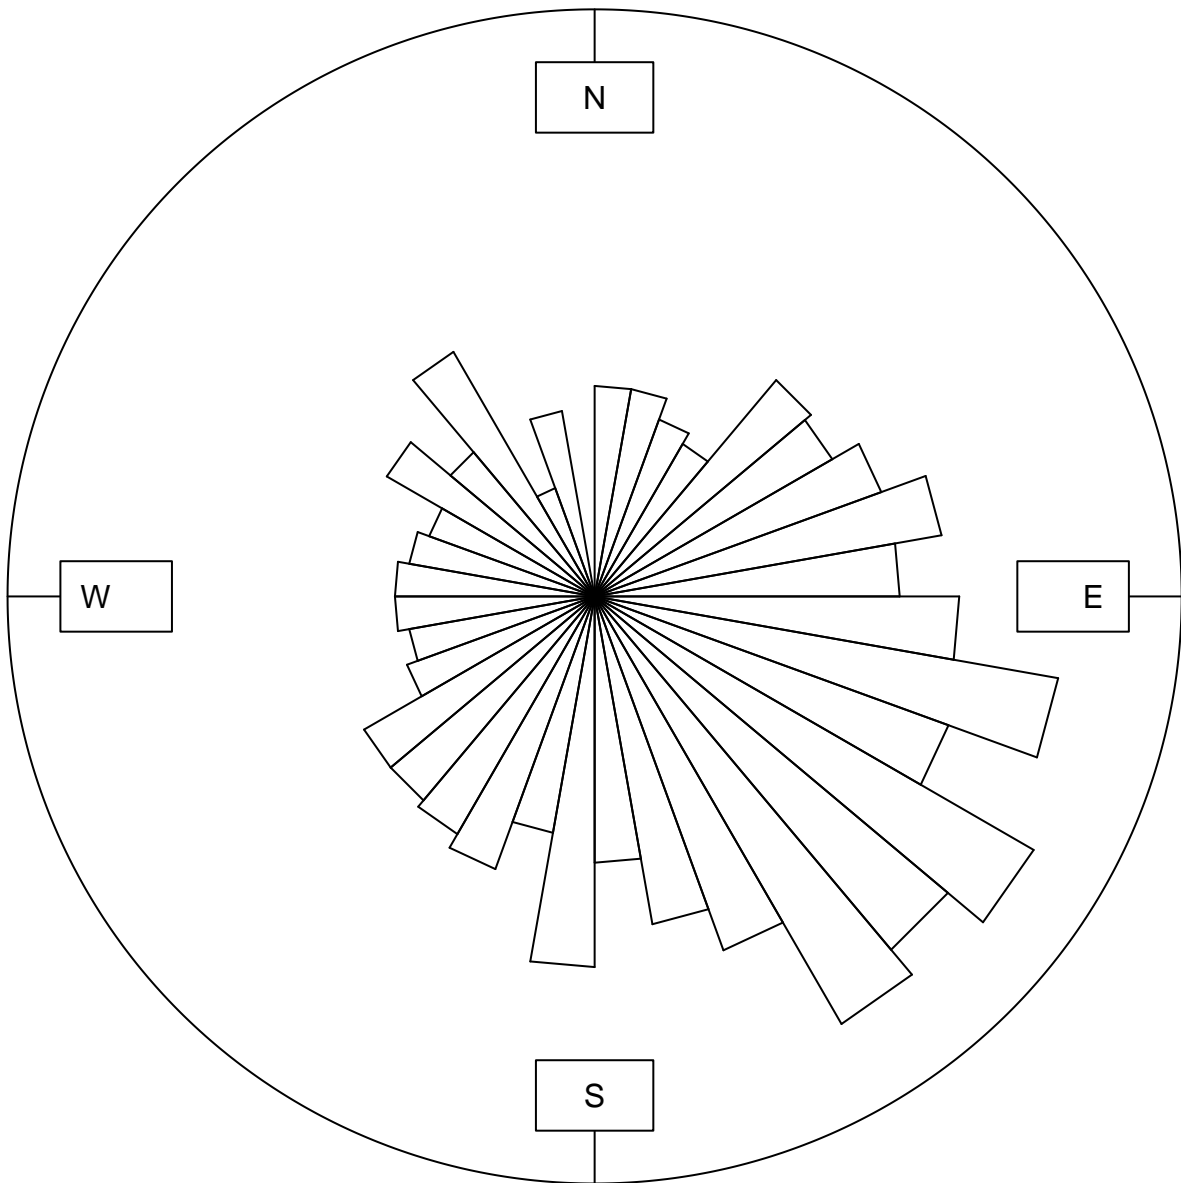

# bootstrap 911

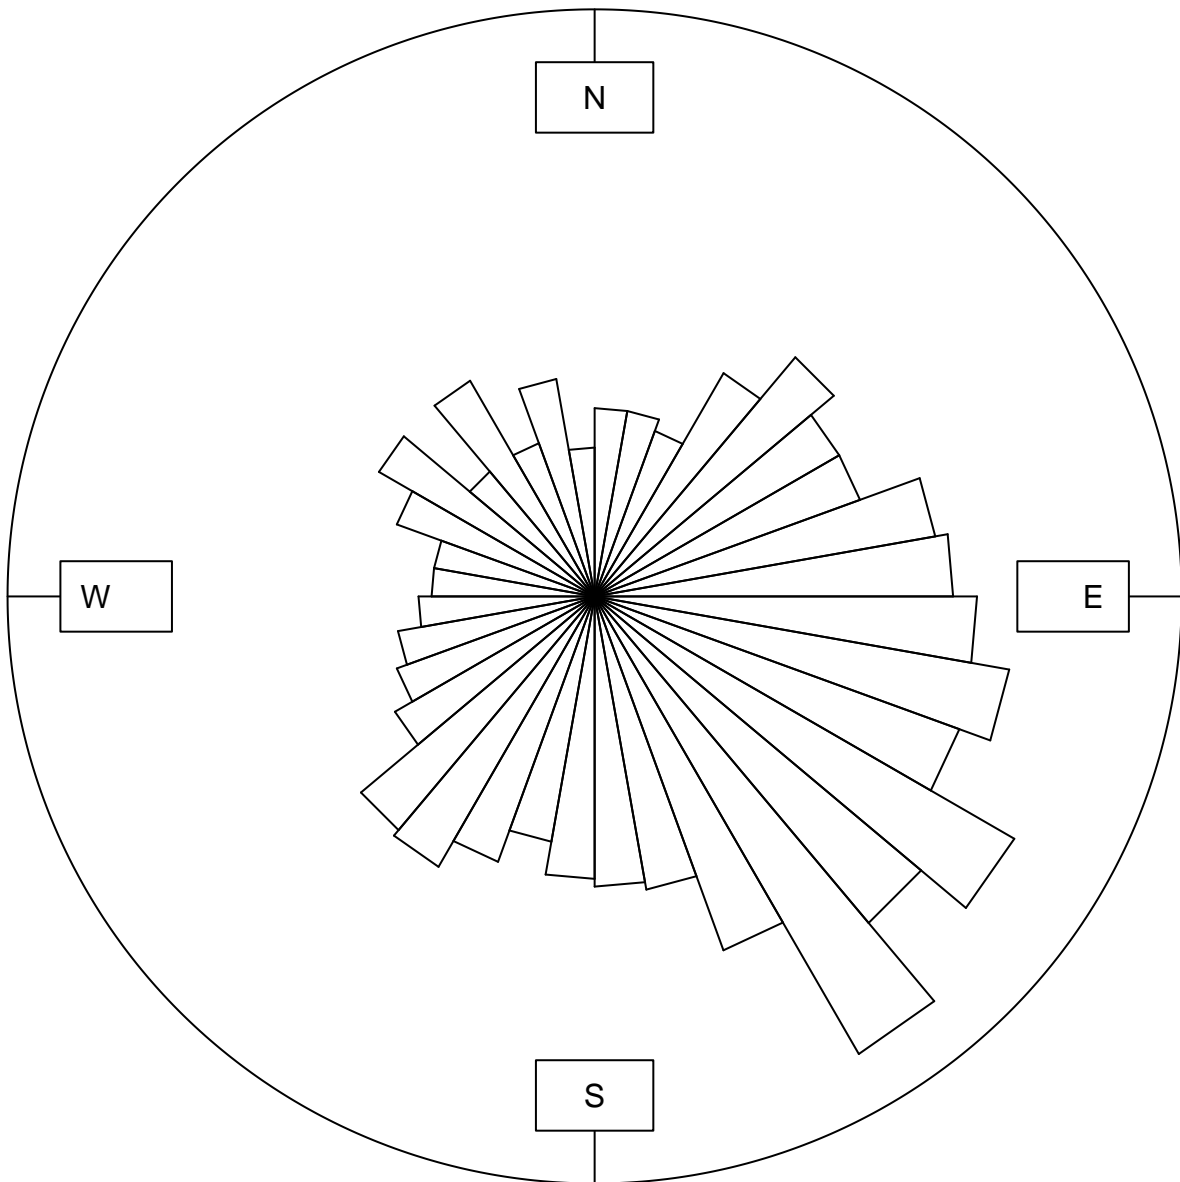

# bootstrap 912

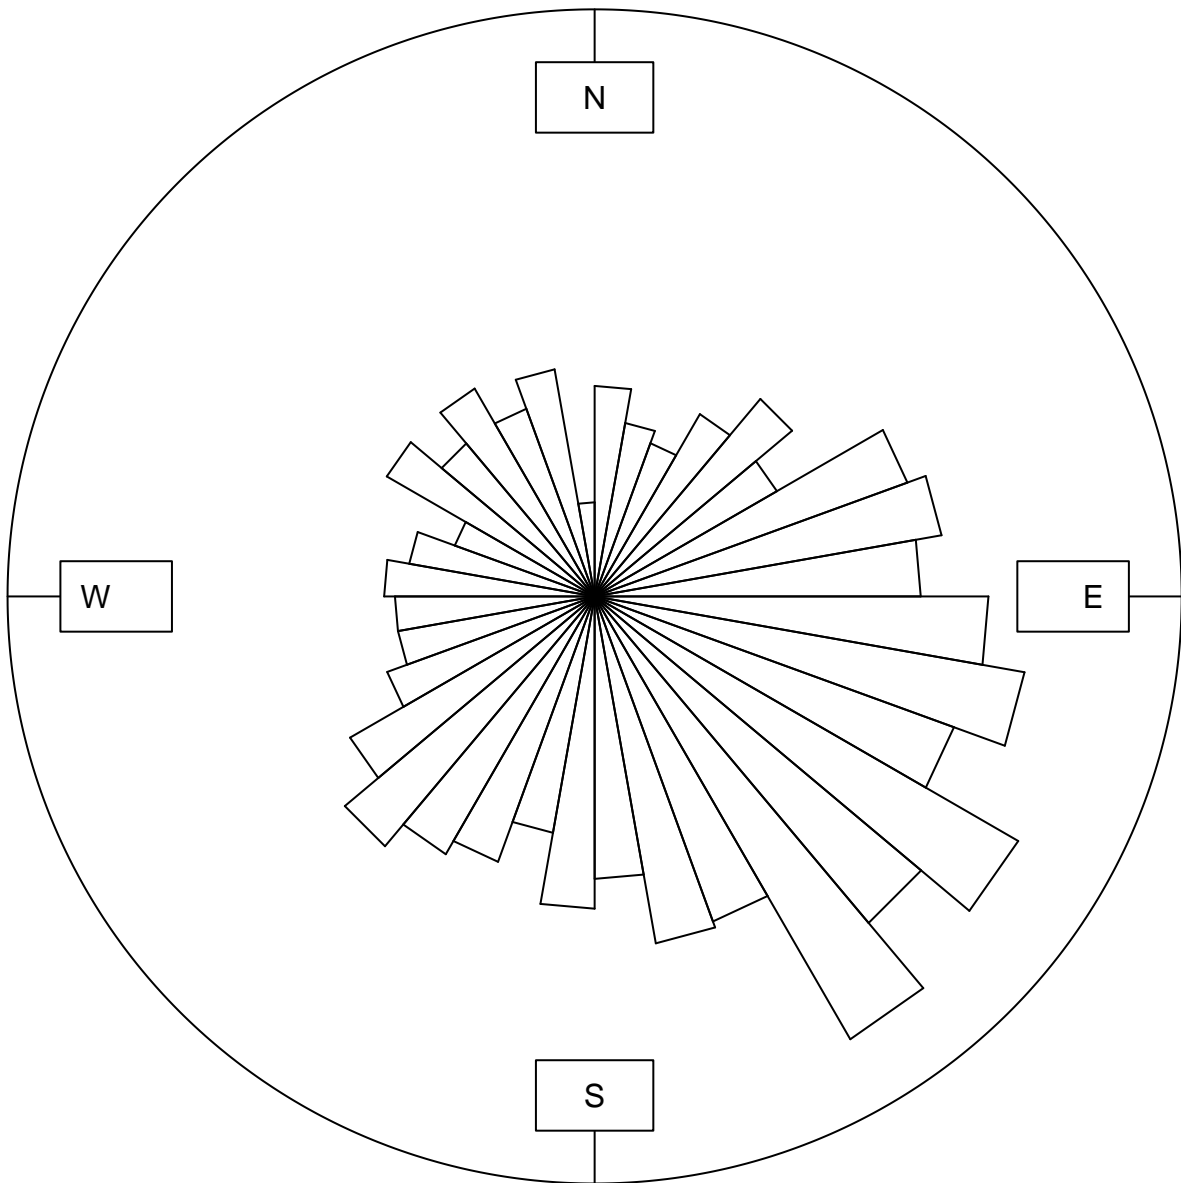



# bootstrap 913

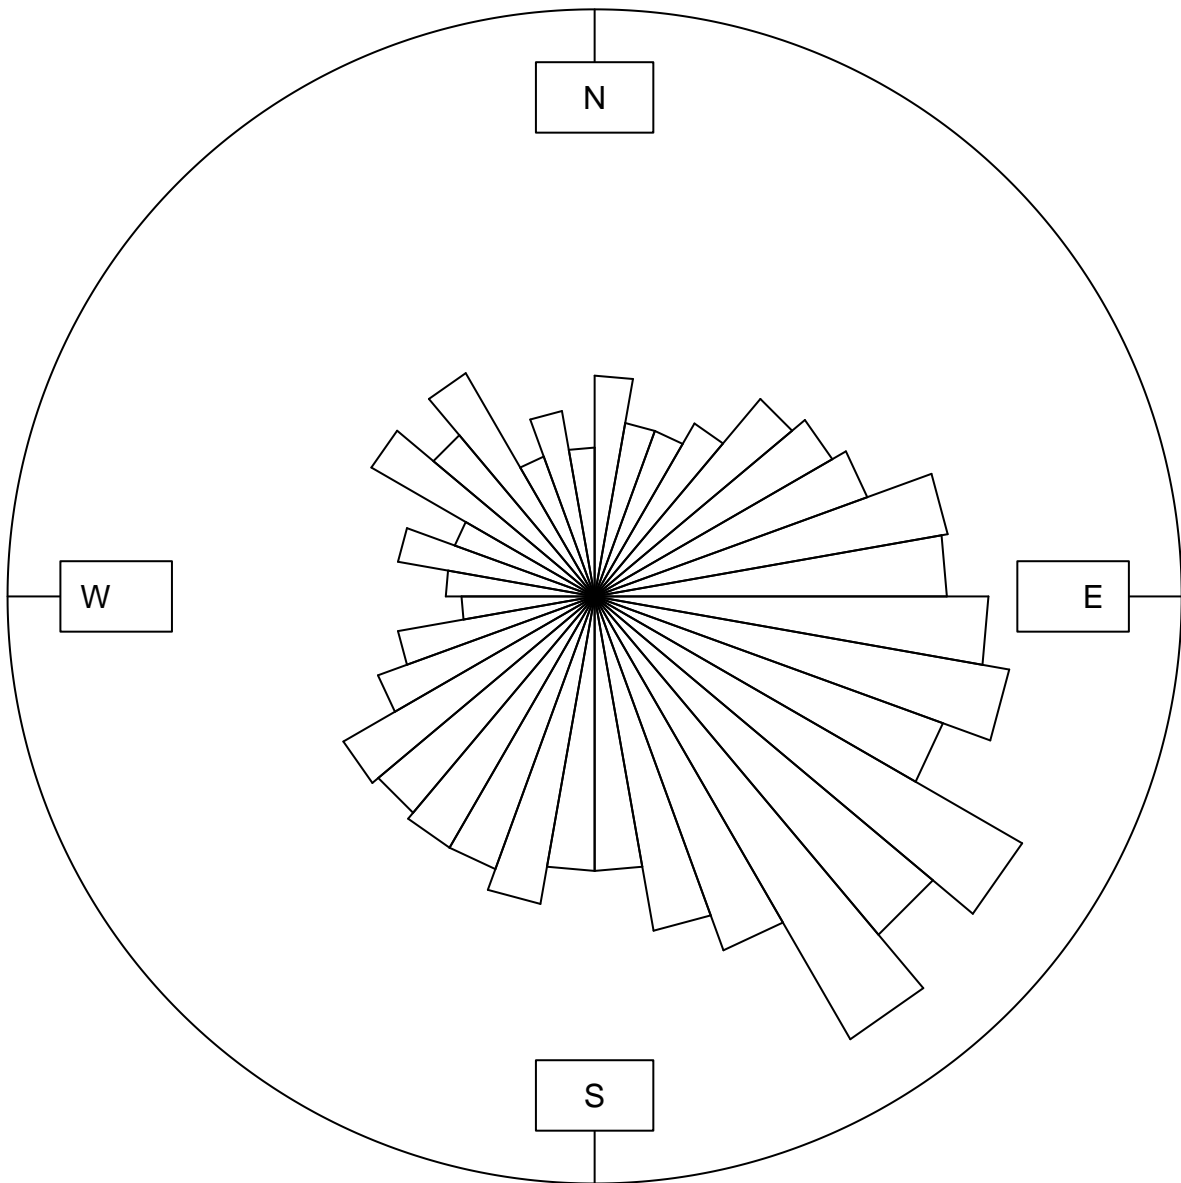

# bootstrap 914

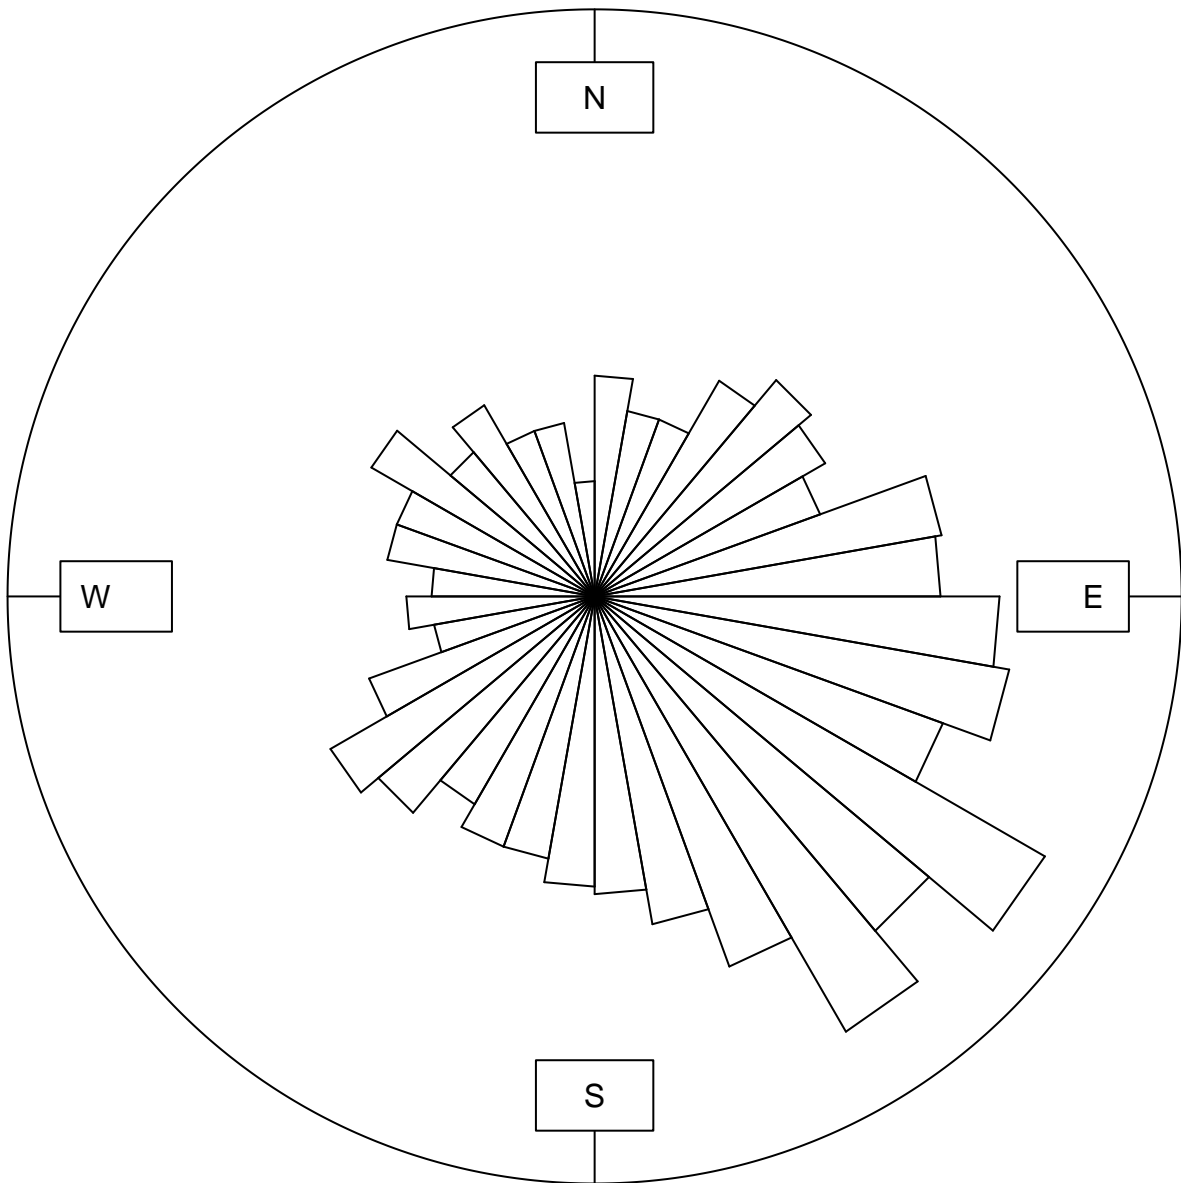

# bootstrap 915

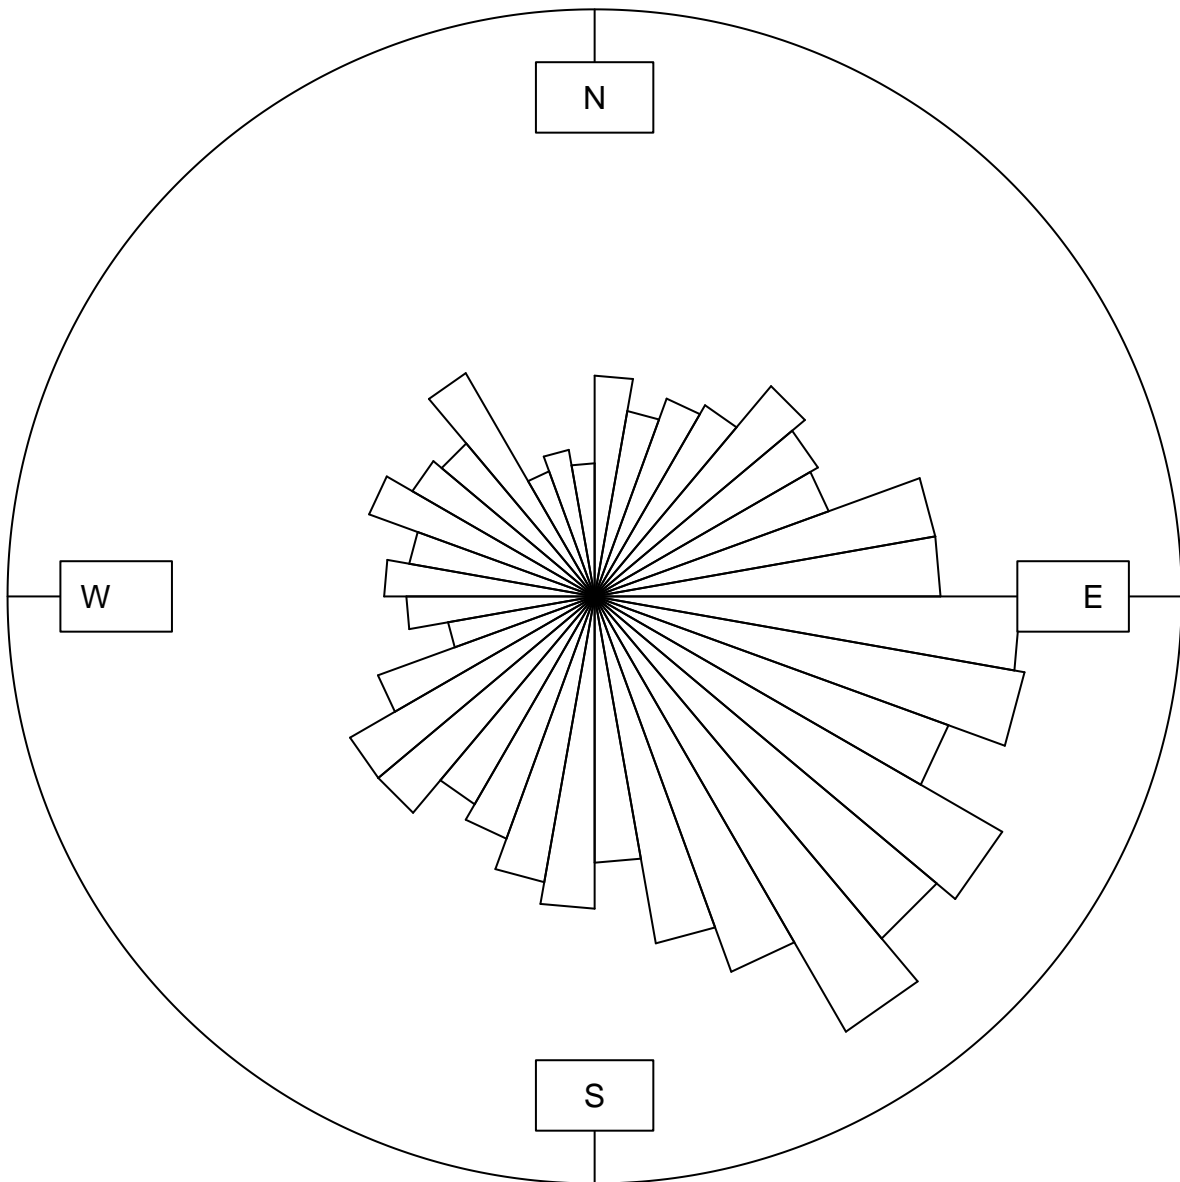

# bootstrap 916

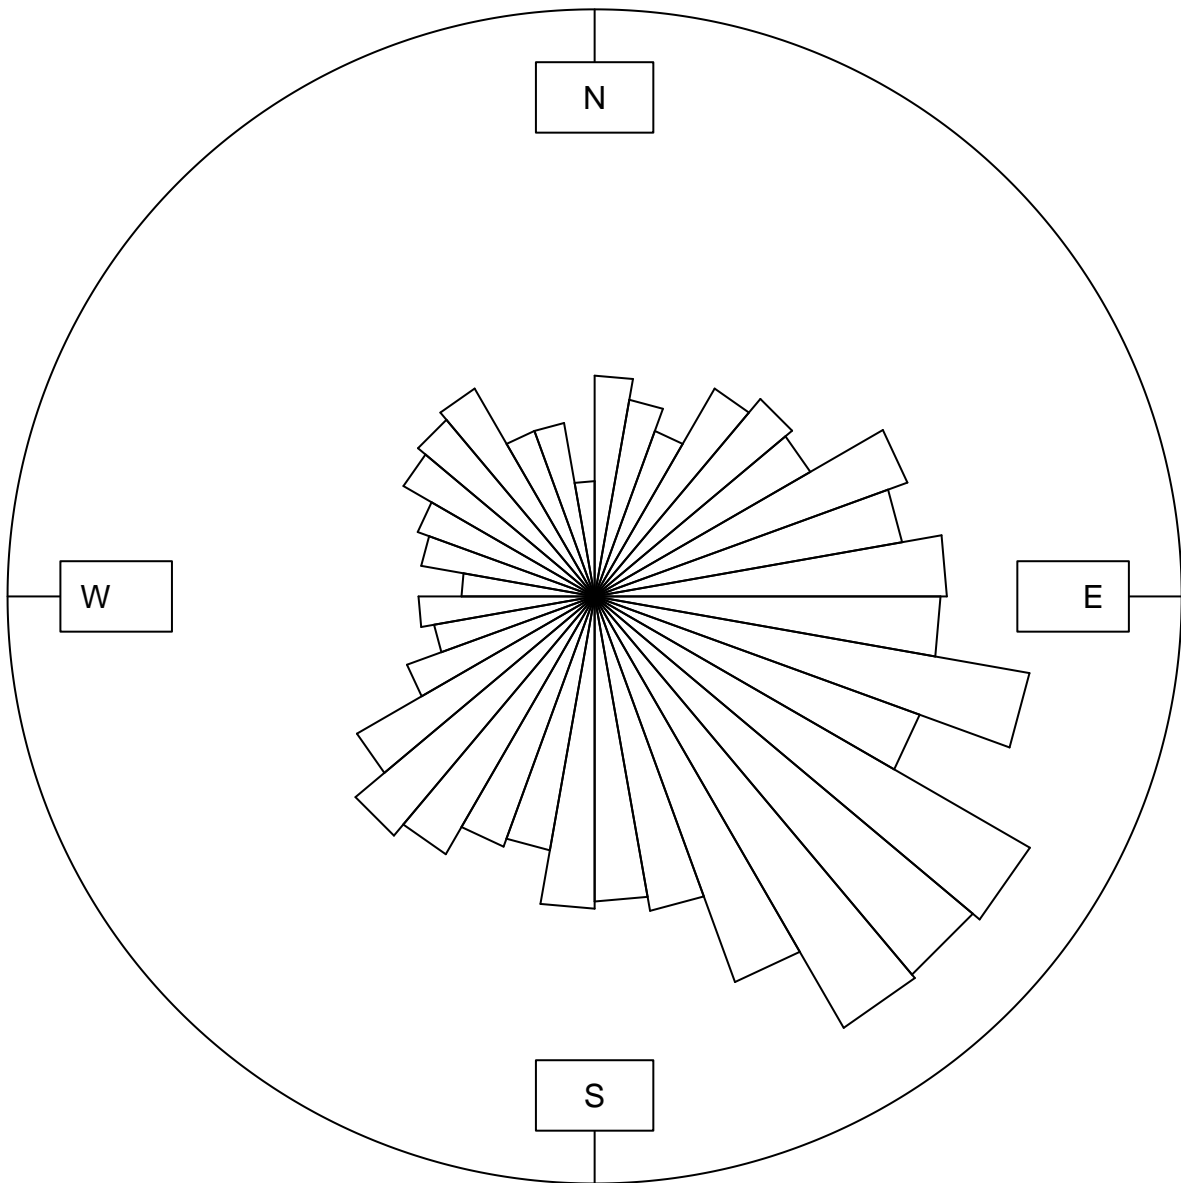

# bootstrap 917

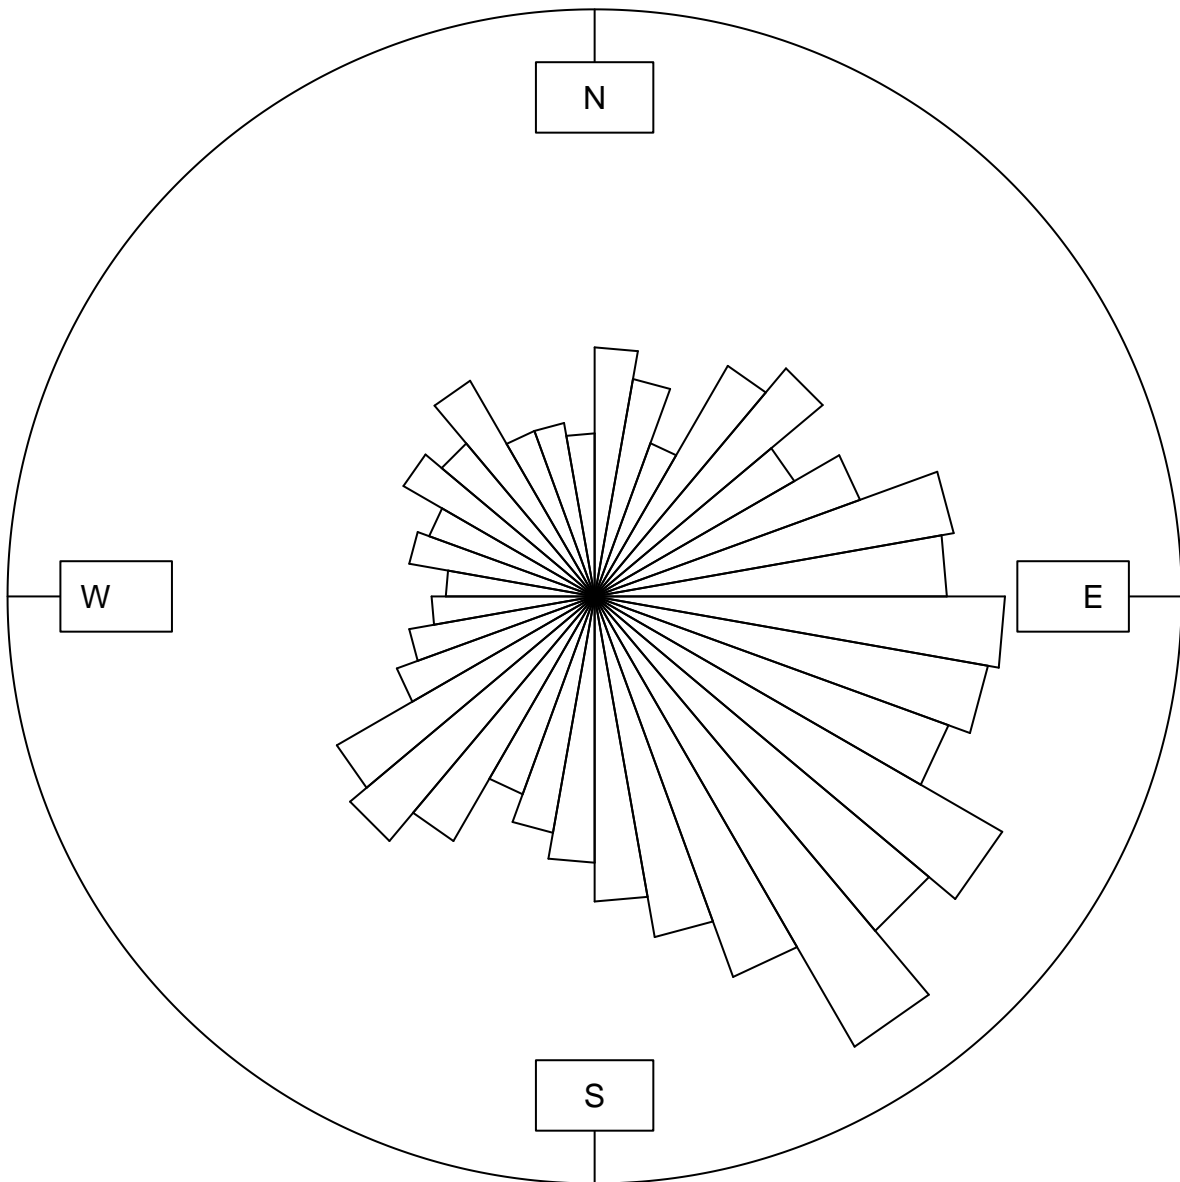

# bootstrap 918

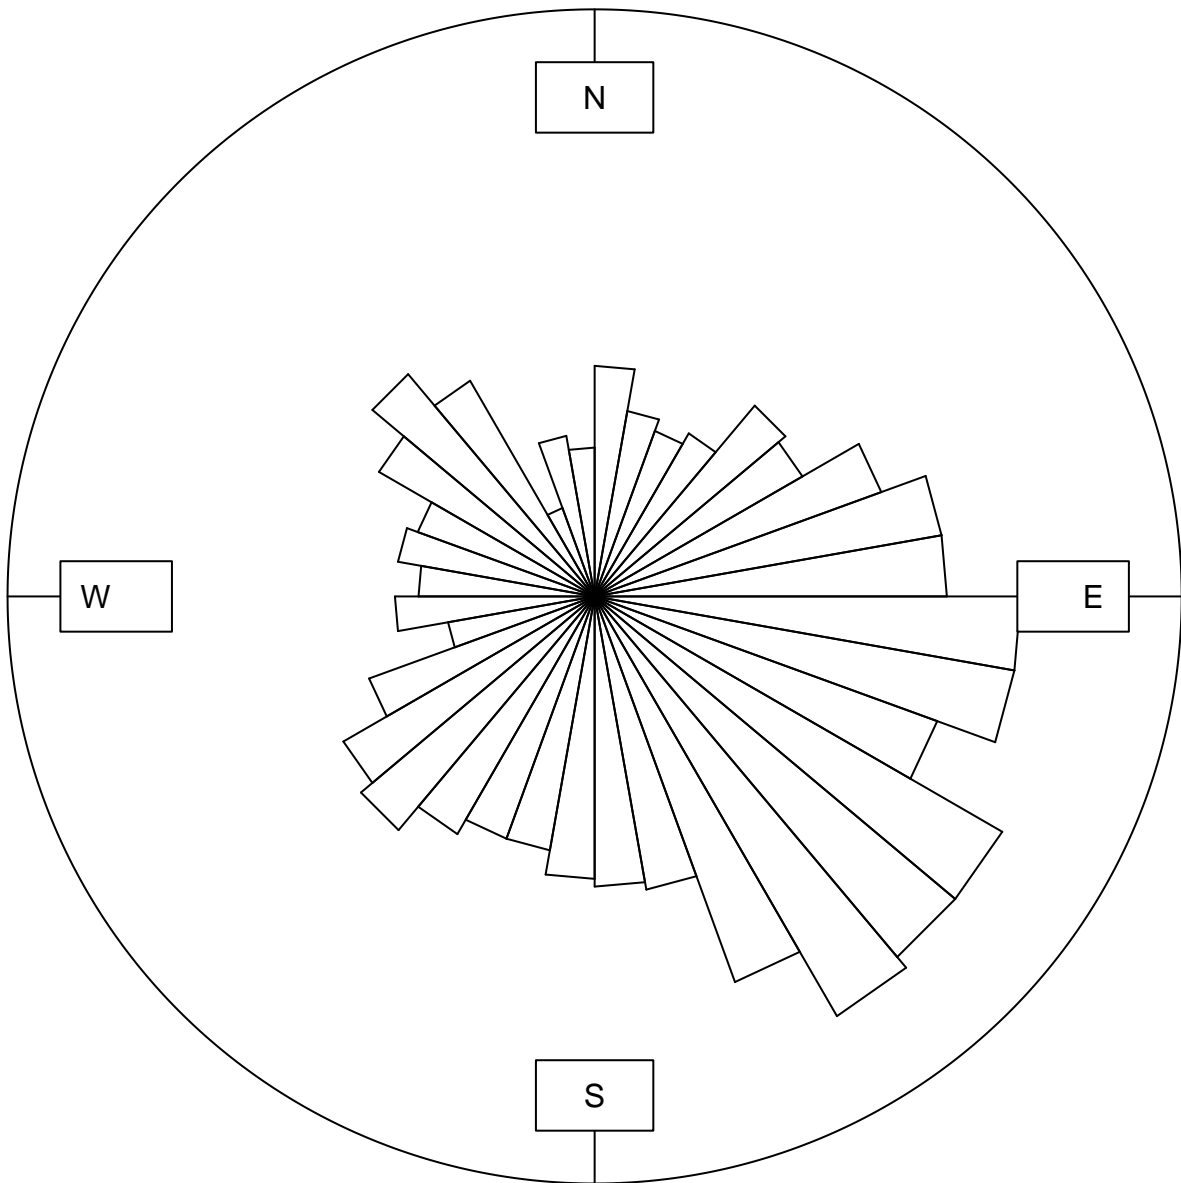

# bootstrap 919

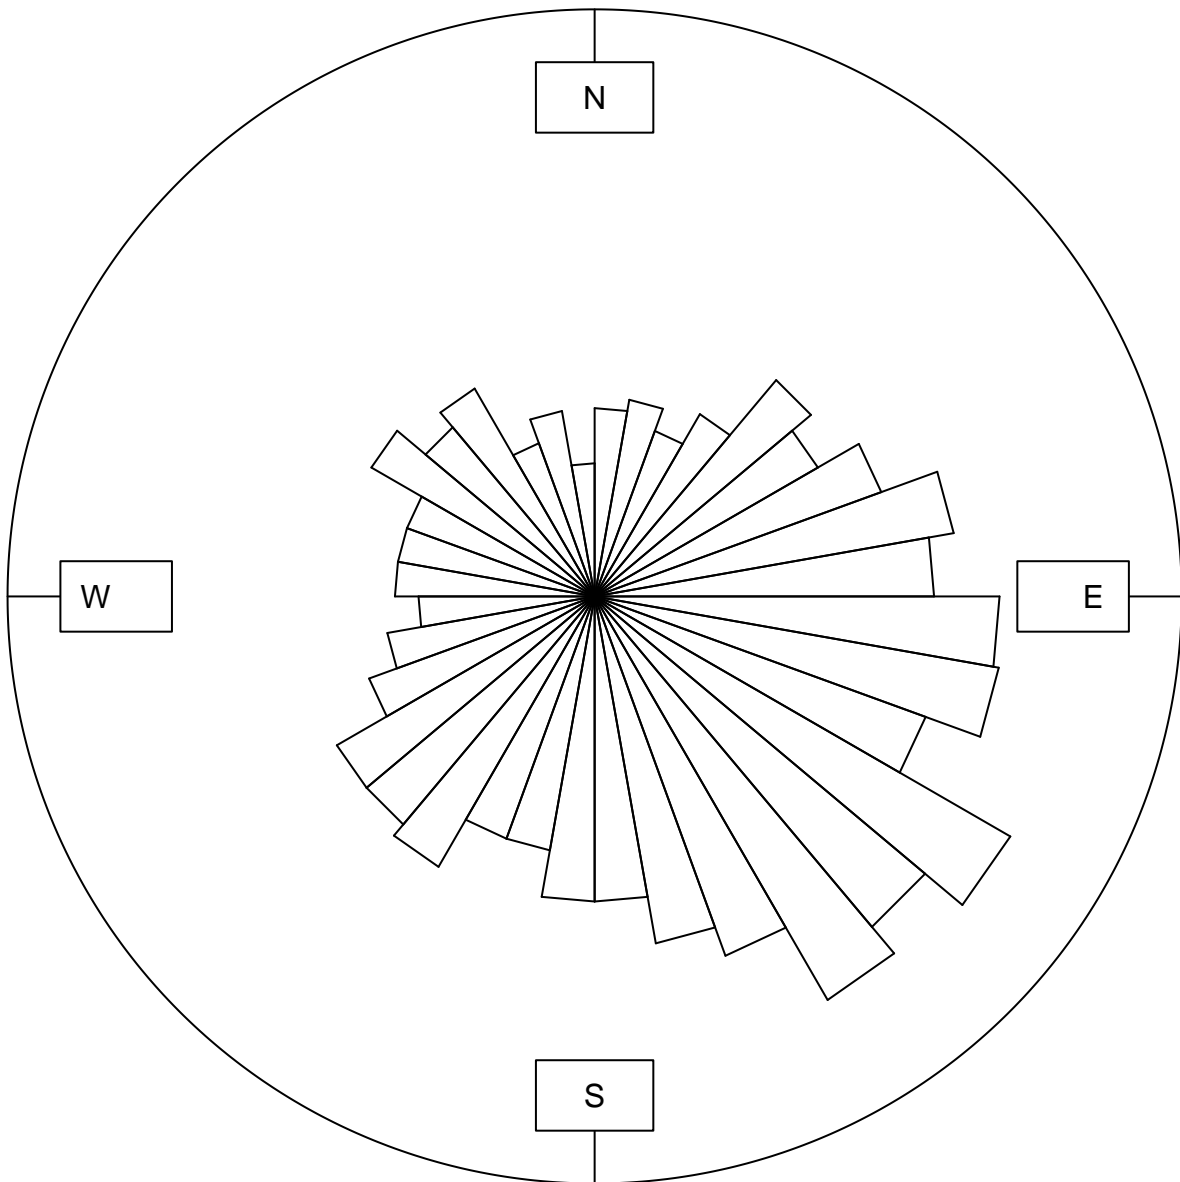

# bootstrap 920

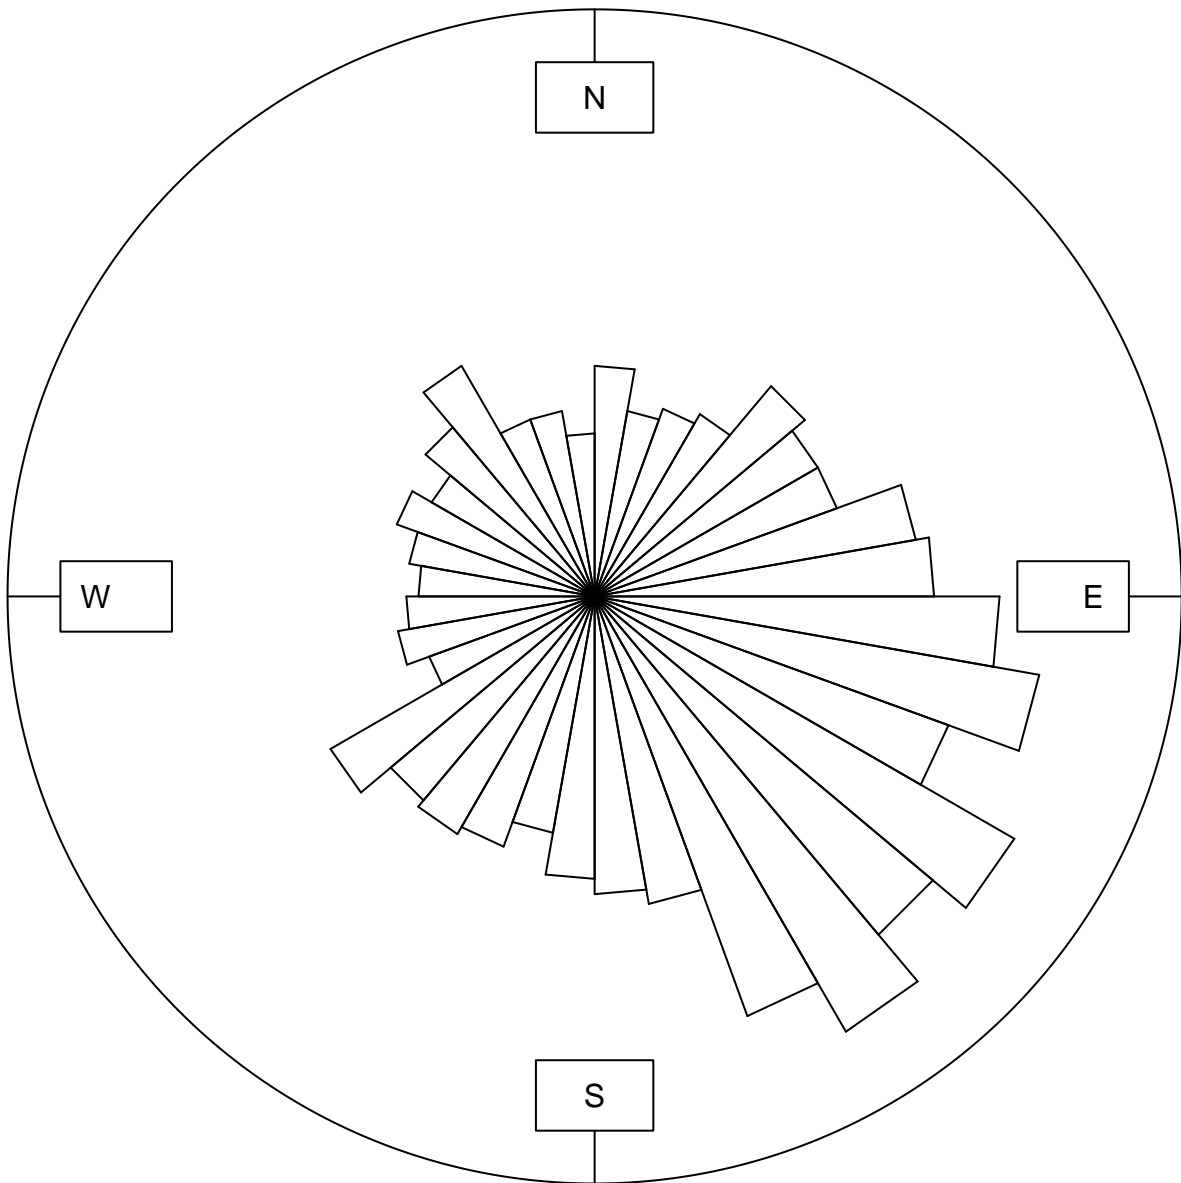



# bootstrap 921

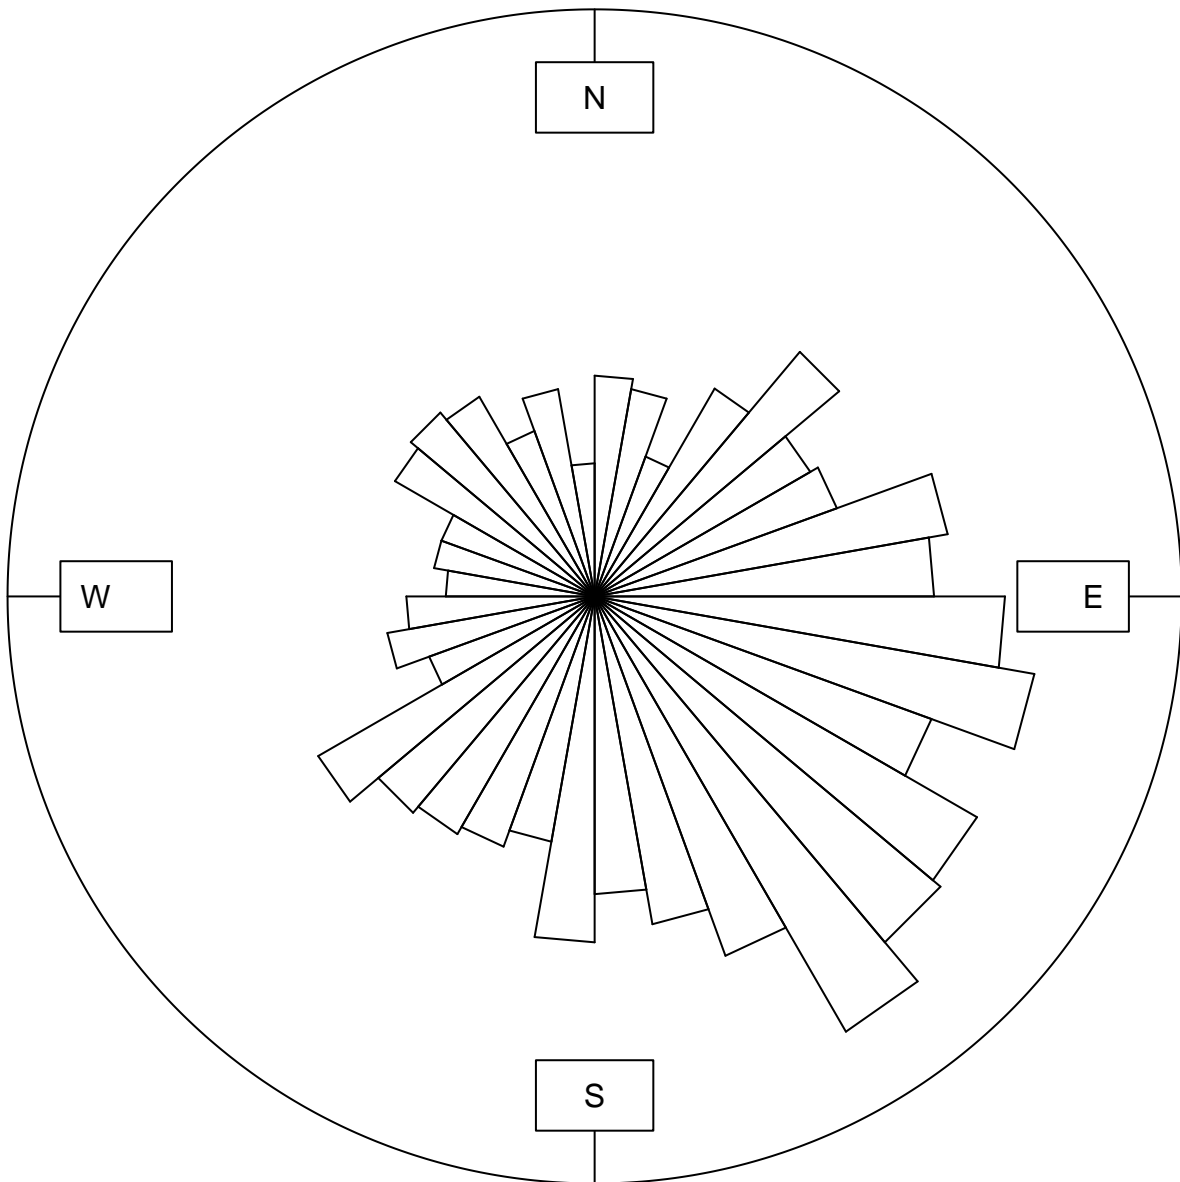

# bootstrap 922

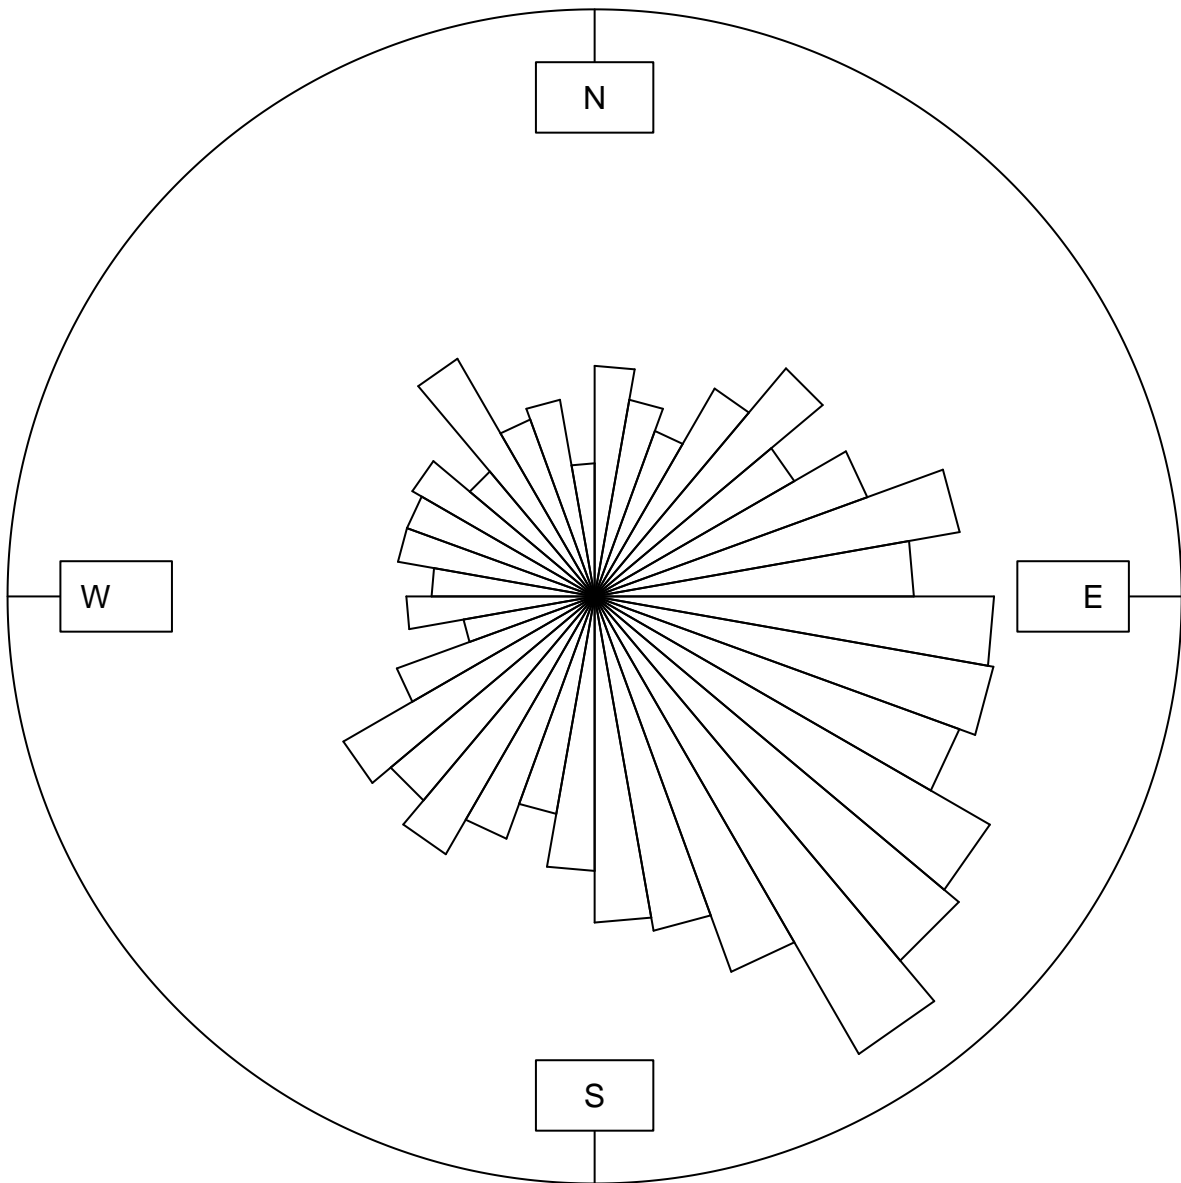

# bootstrap 923

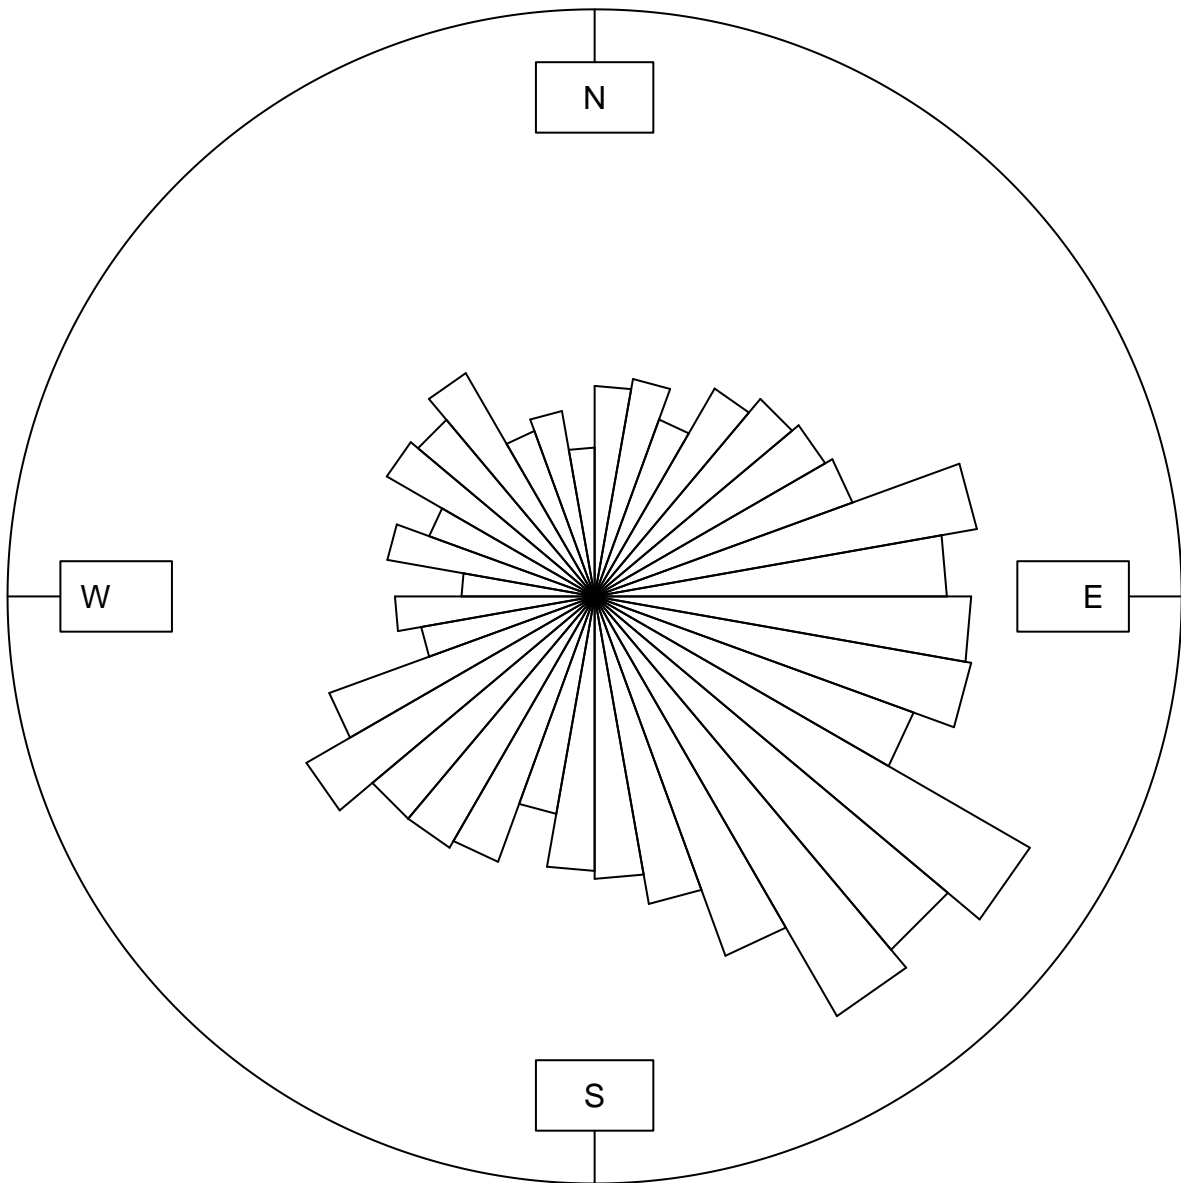

# bootstrap 924

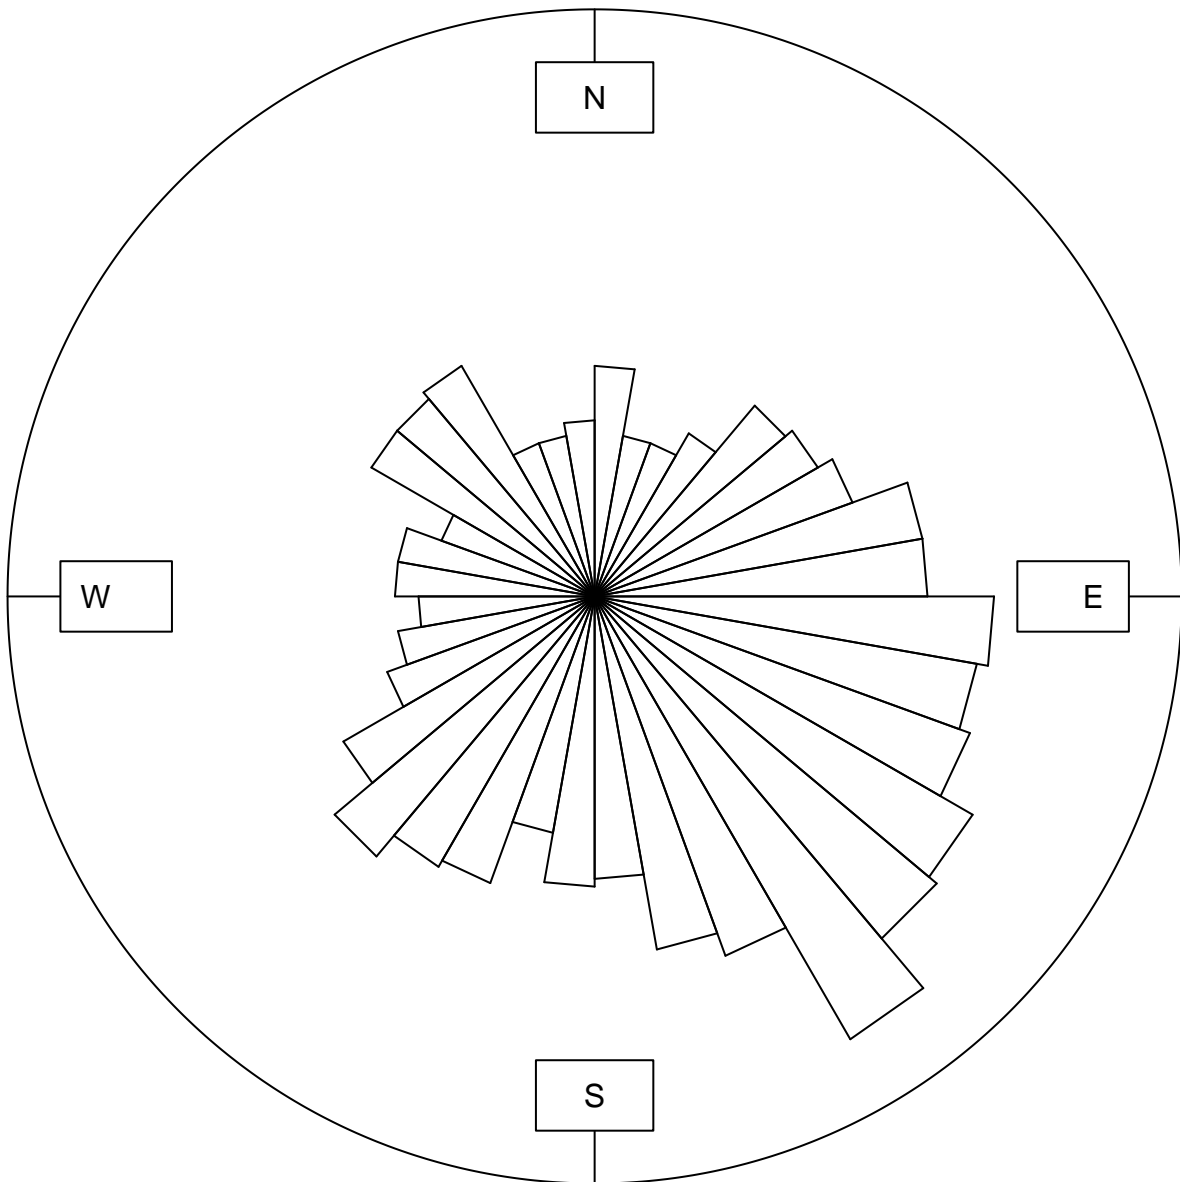

# bootstrap 925

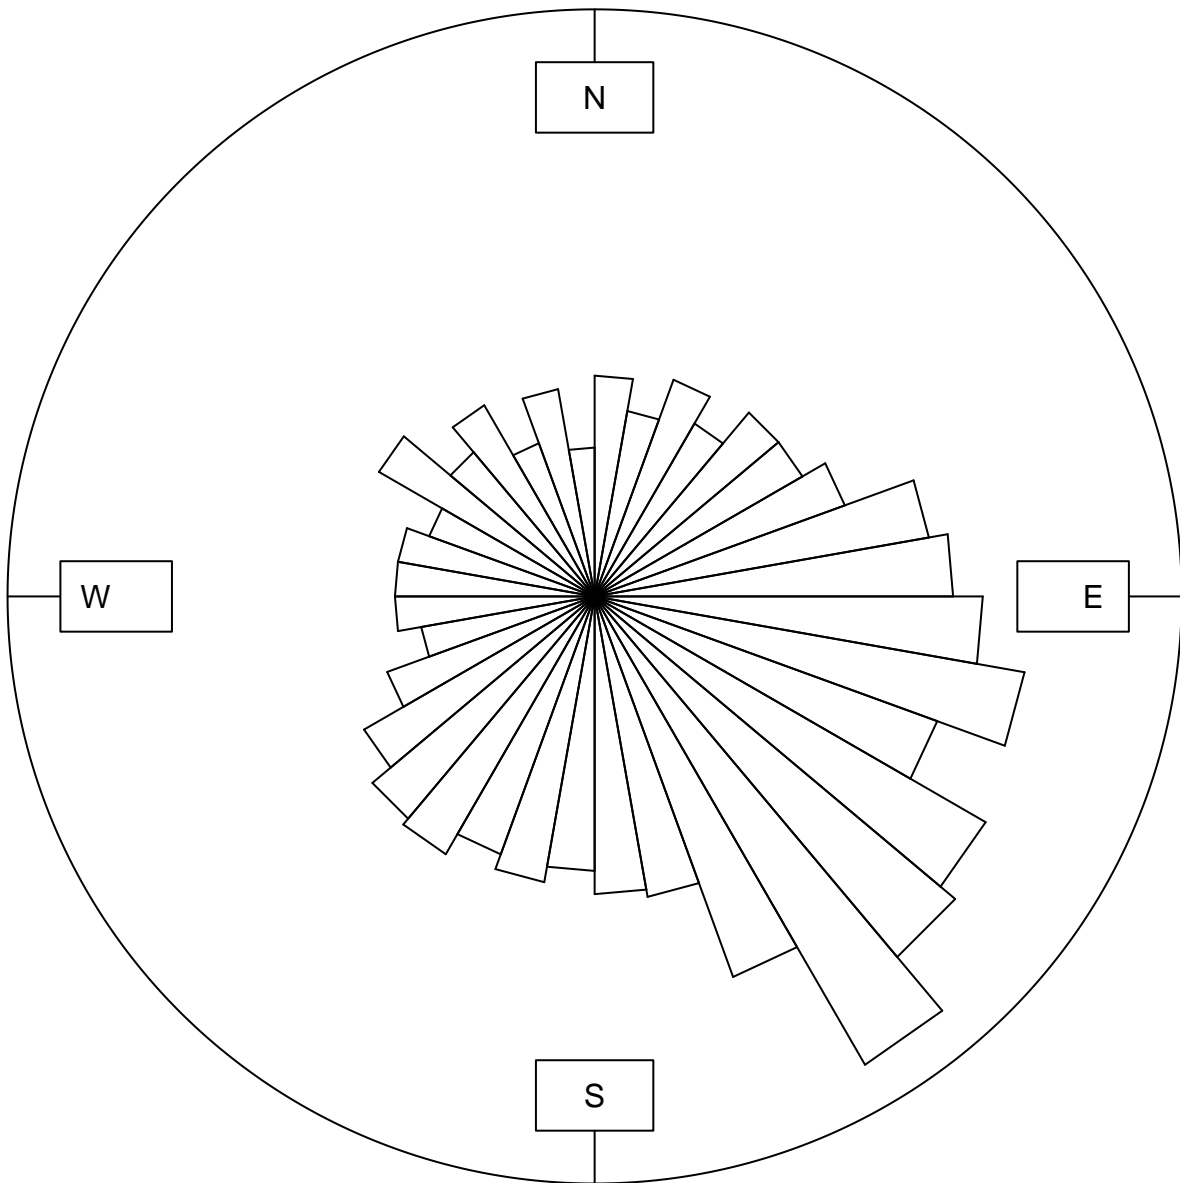

# bootstrap 926

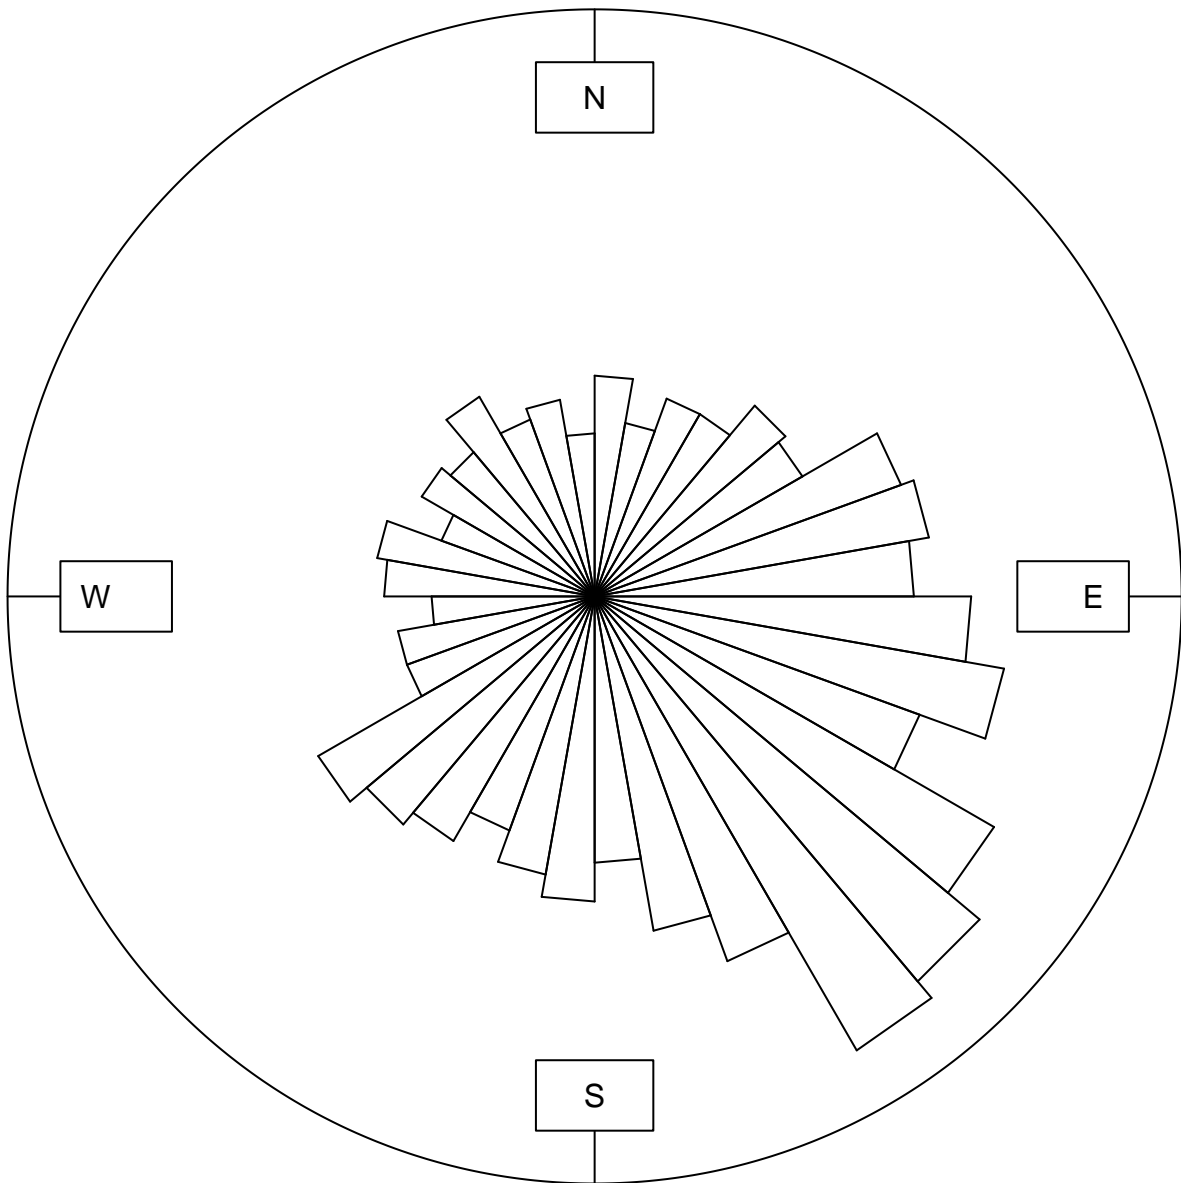

# bootstrap 927

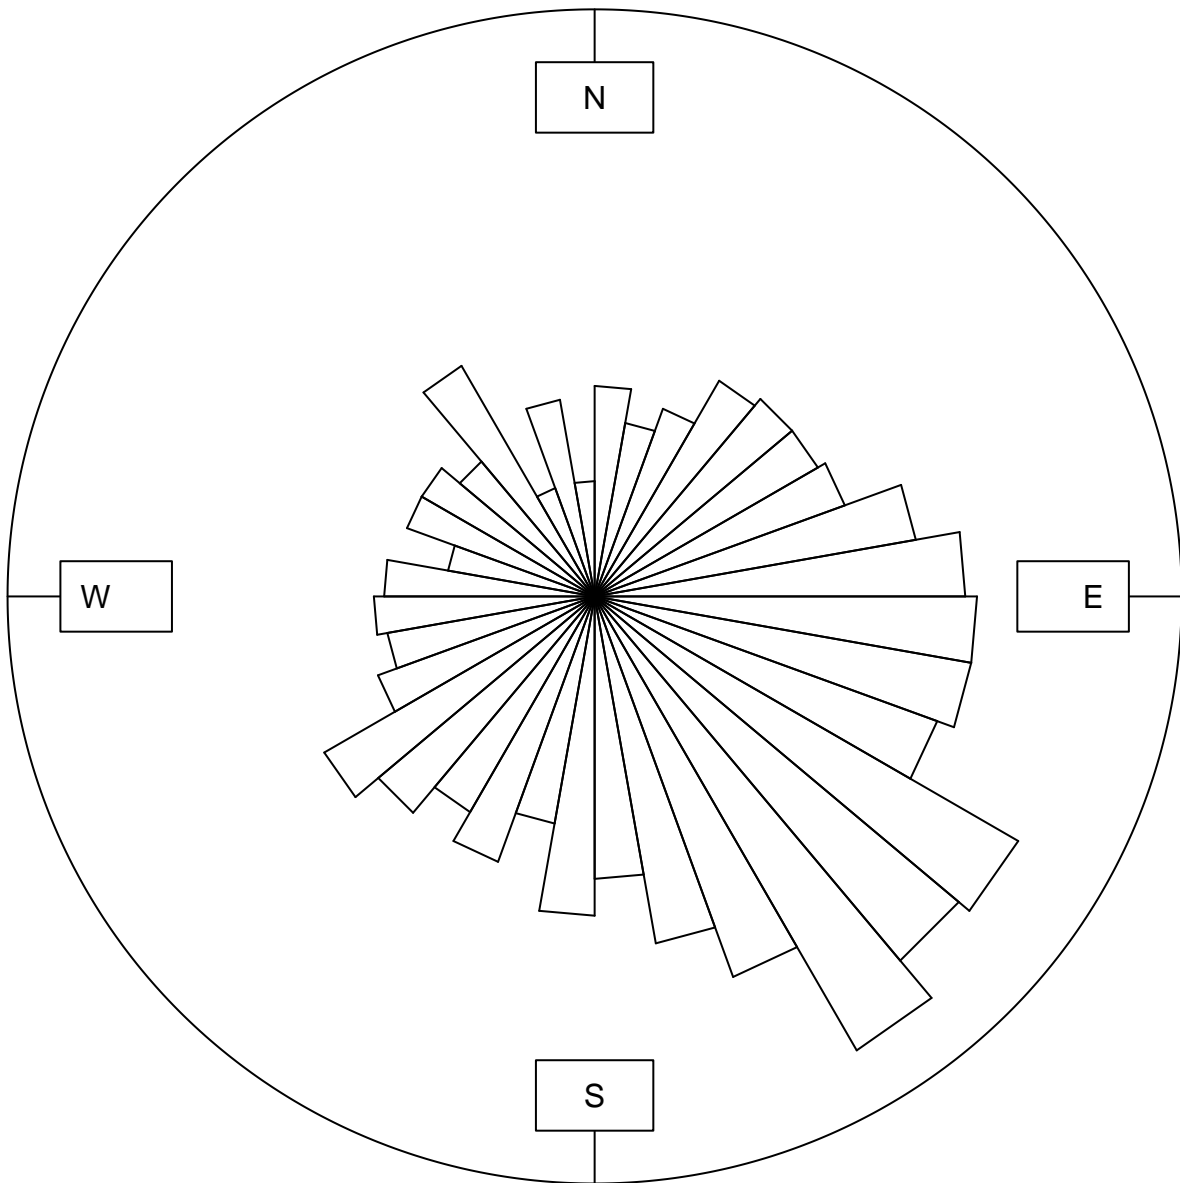

# bootstrap 928

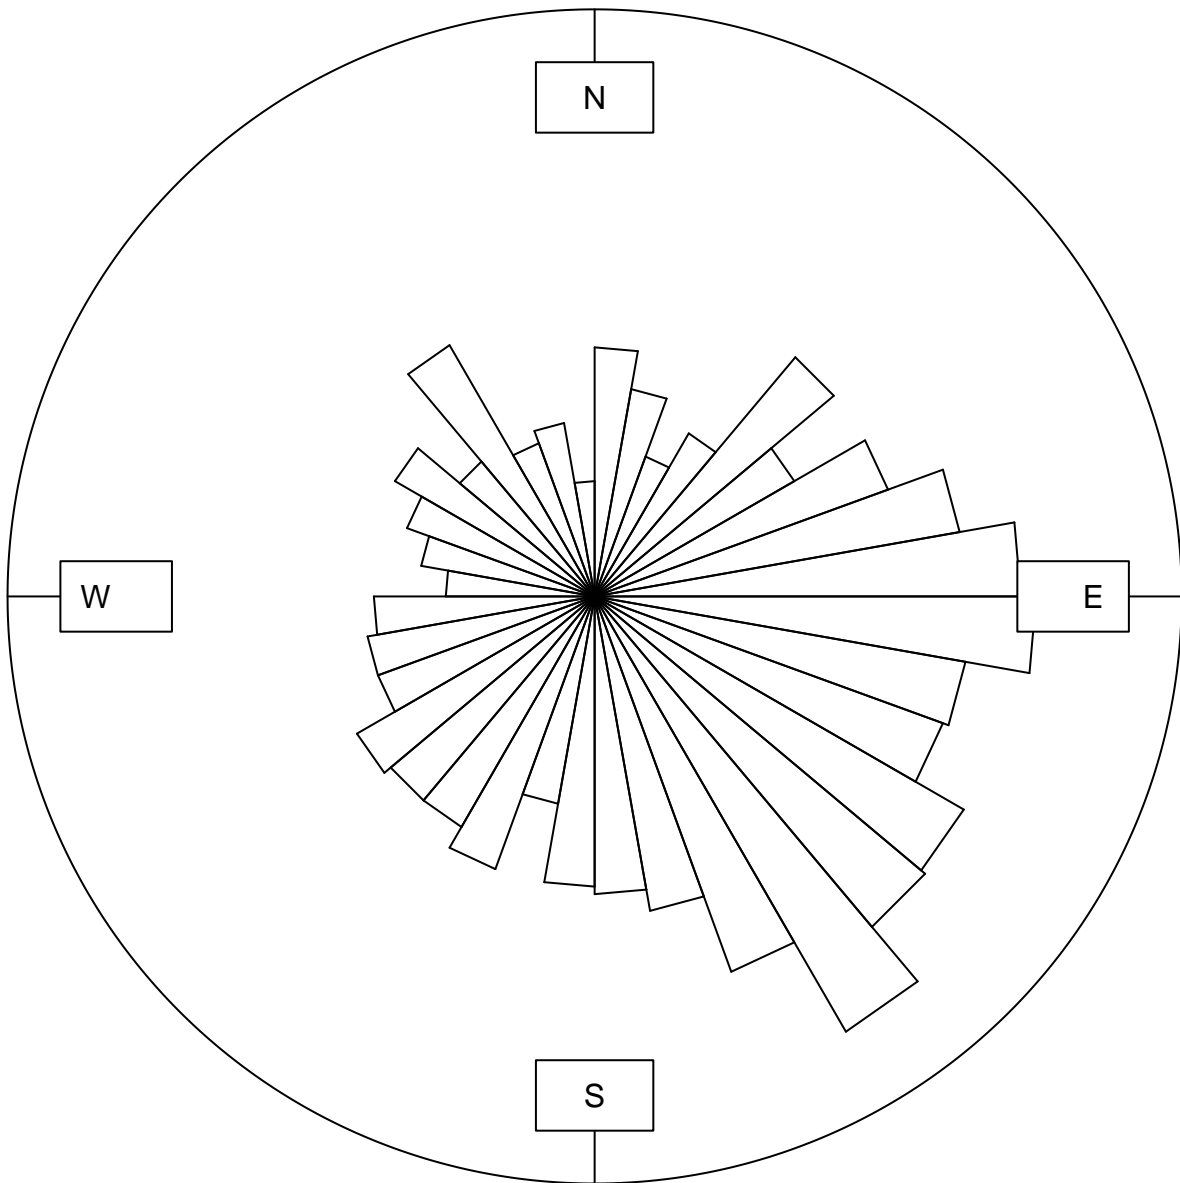



# bootstrap 929

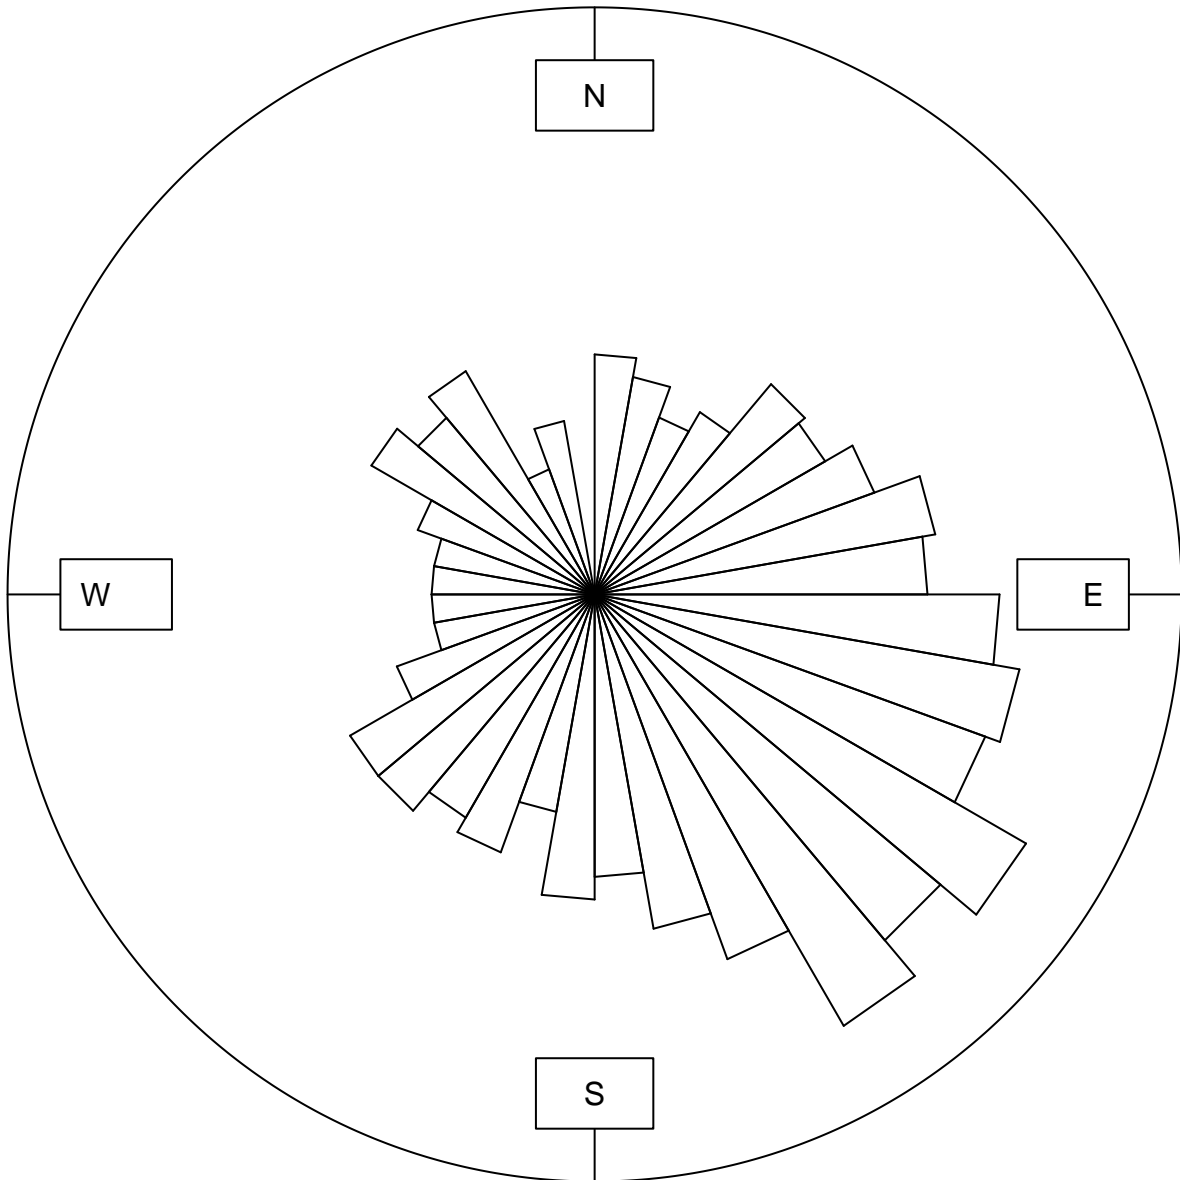

# bootstrap 930

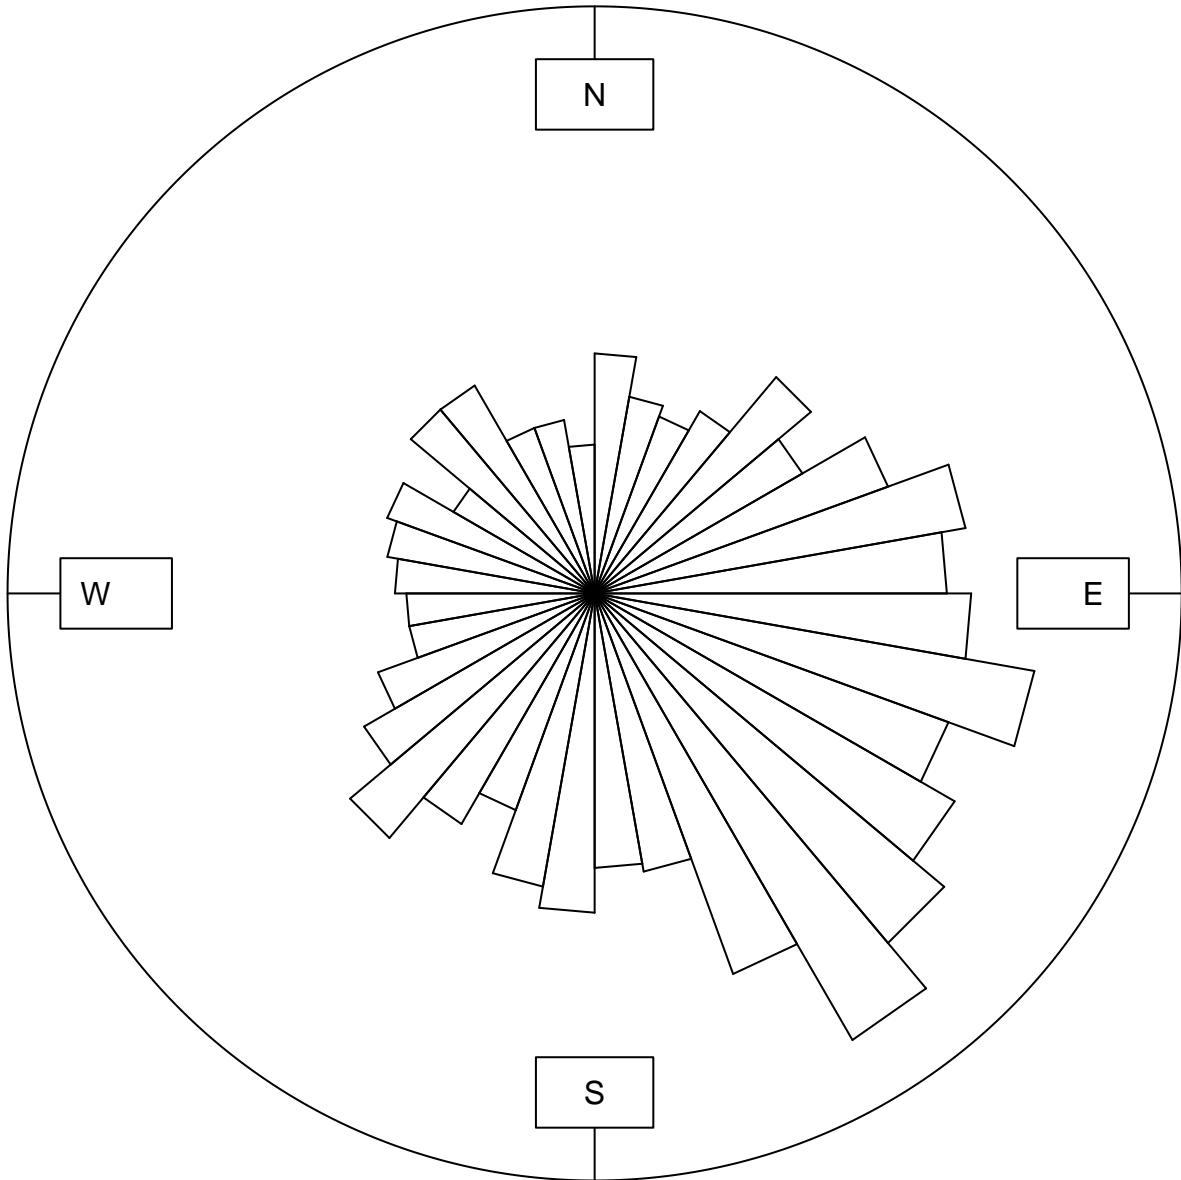

# bootstrap 931

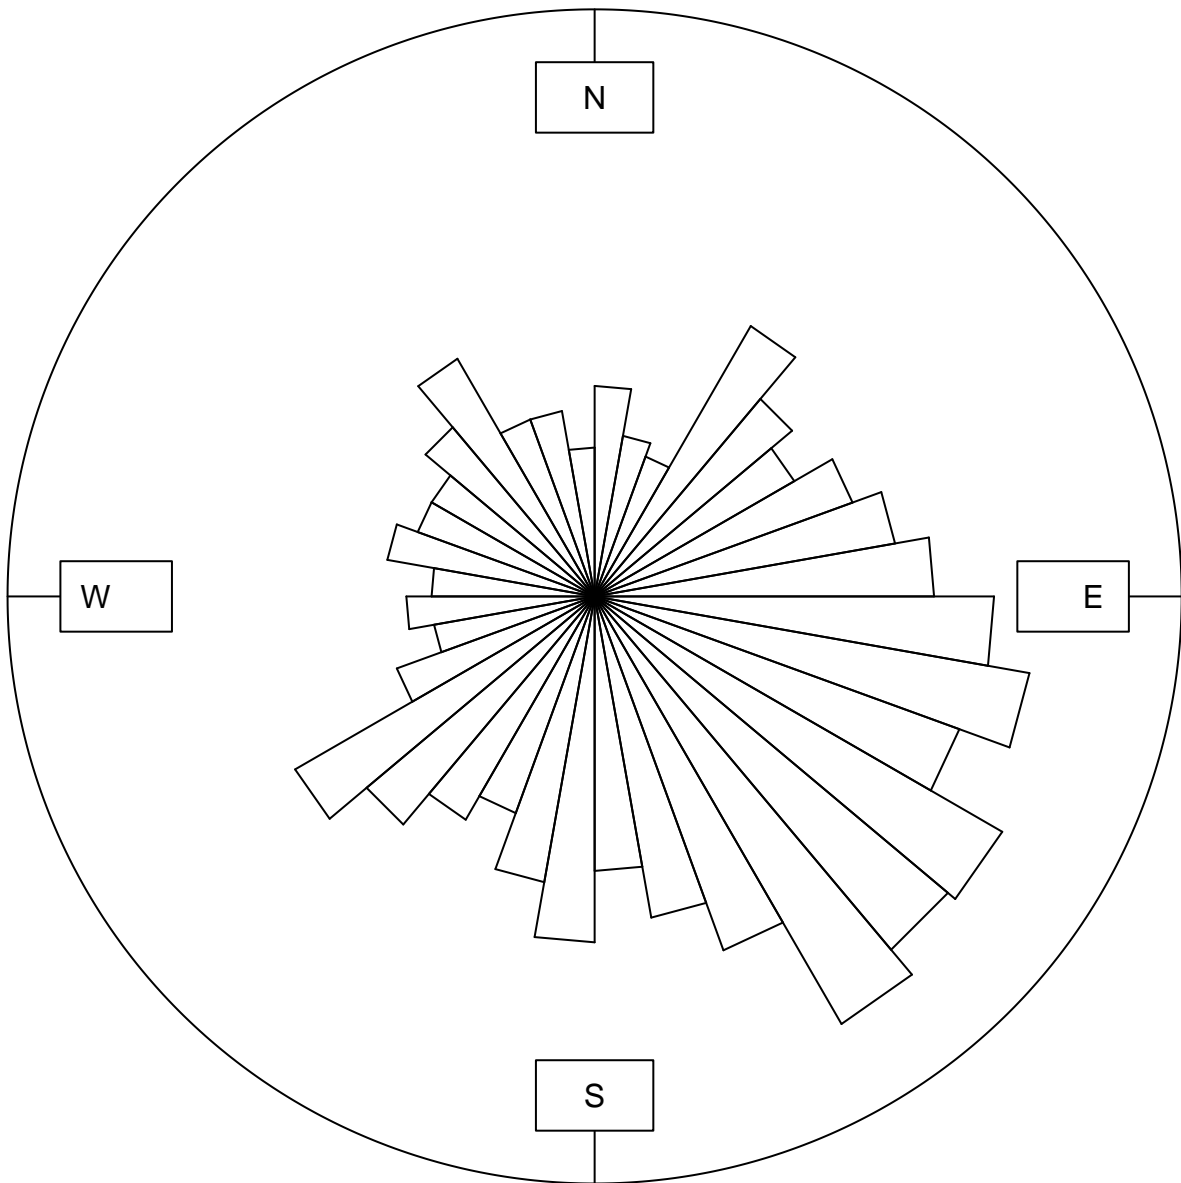

# bootstrap 932

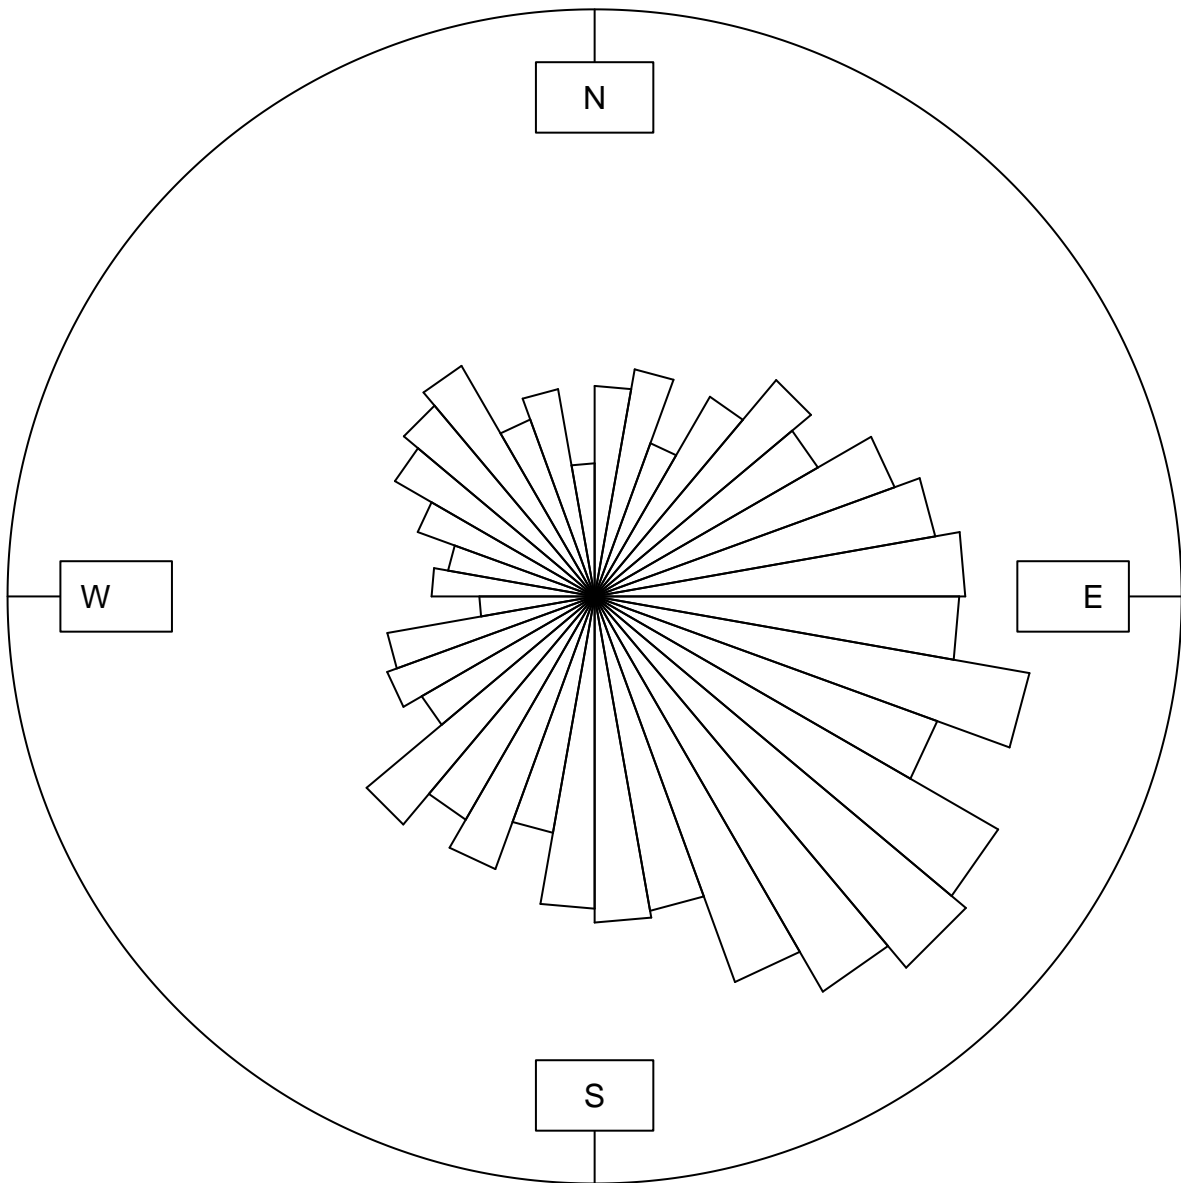

# bootstrap 933

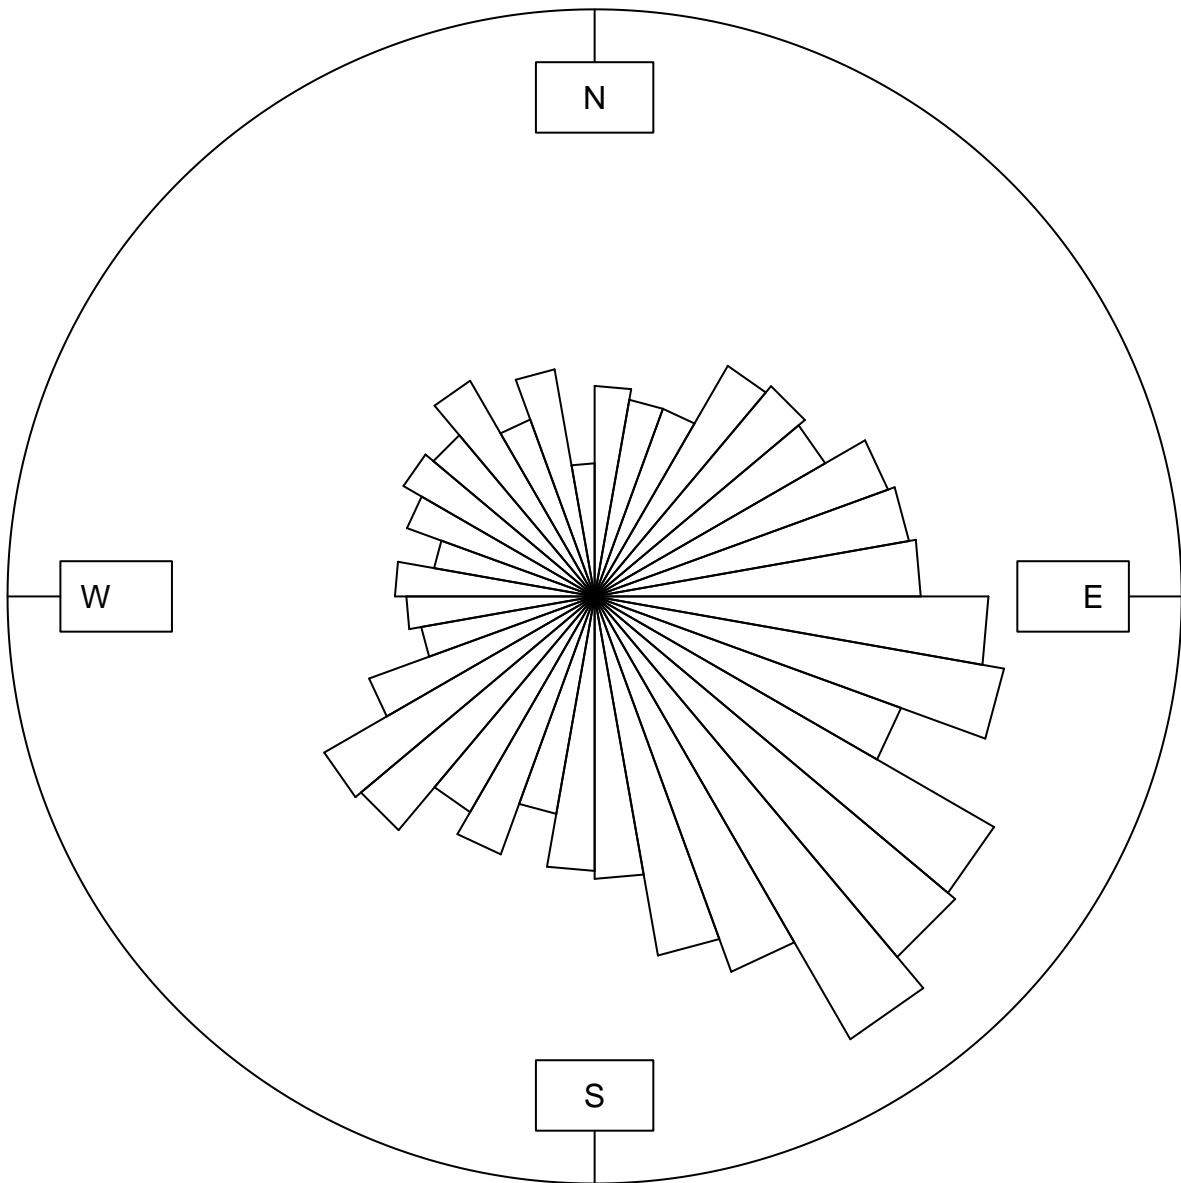

# bootstrap 934

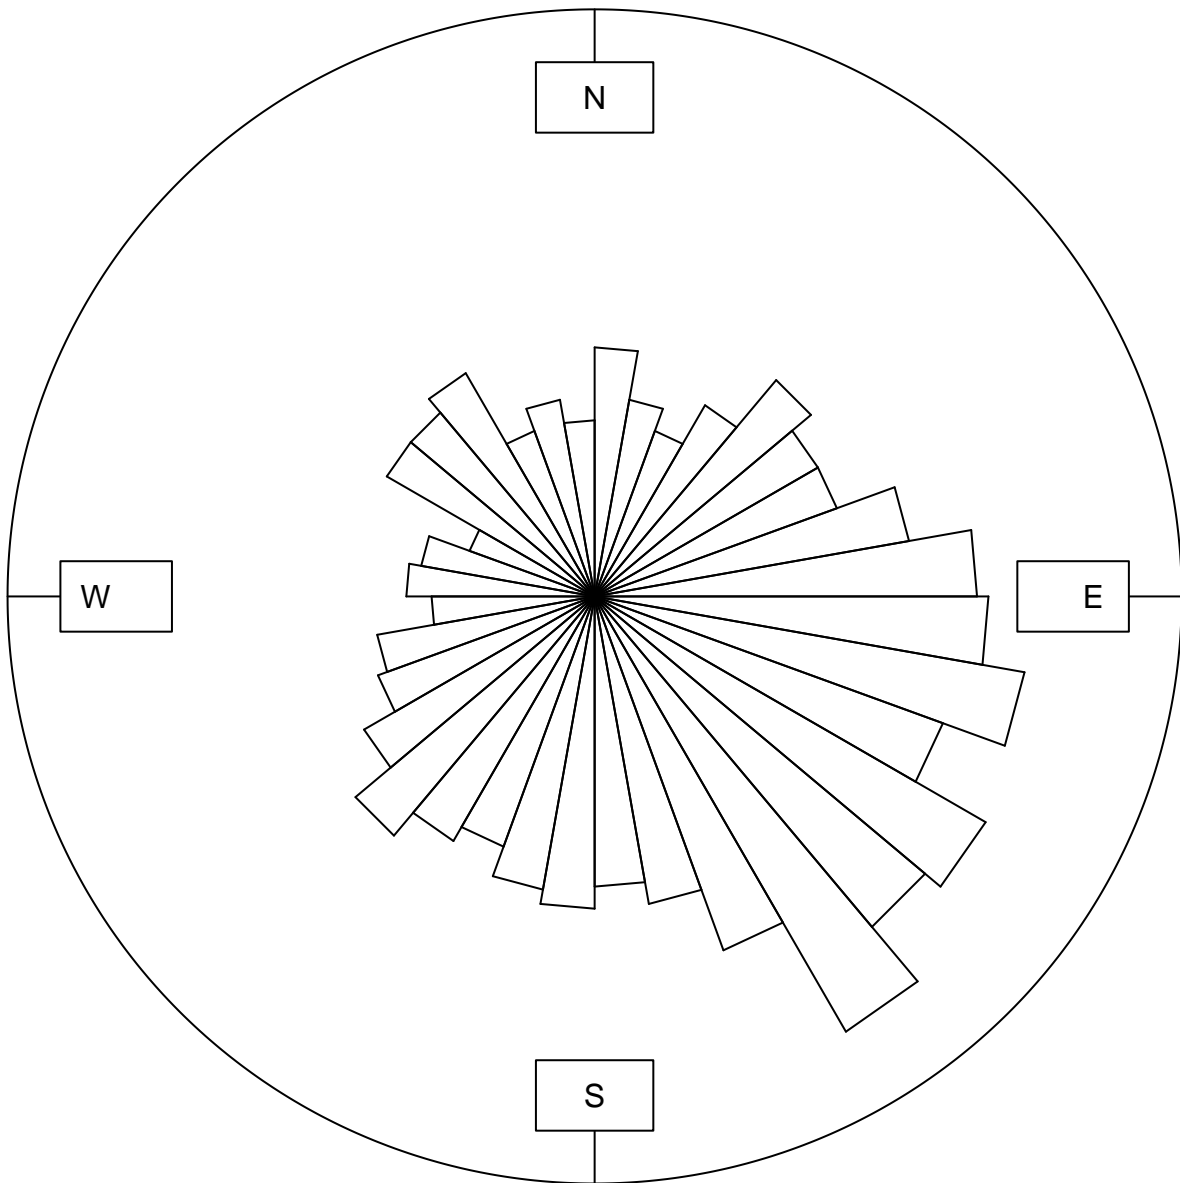

# bootstrap 935

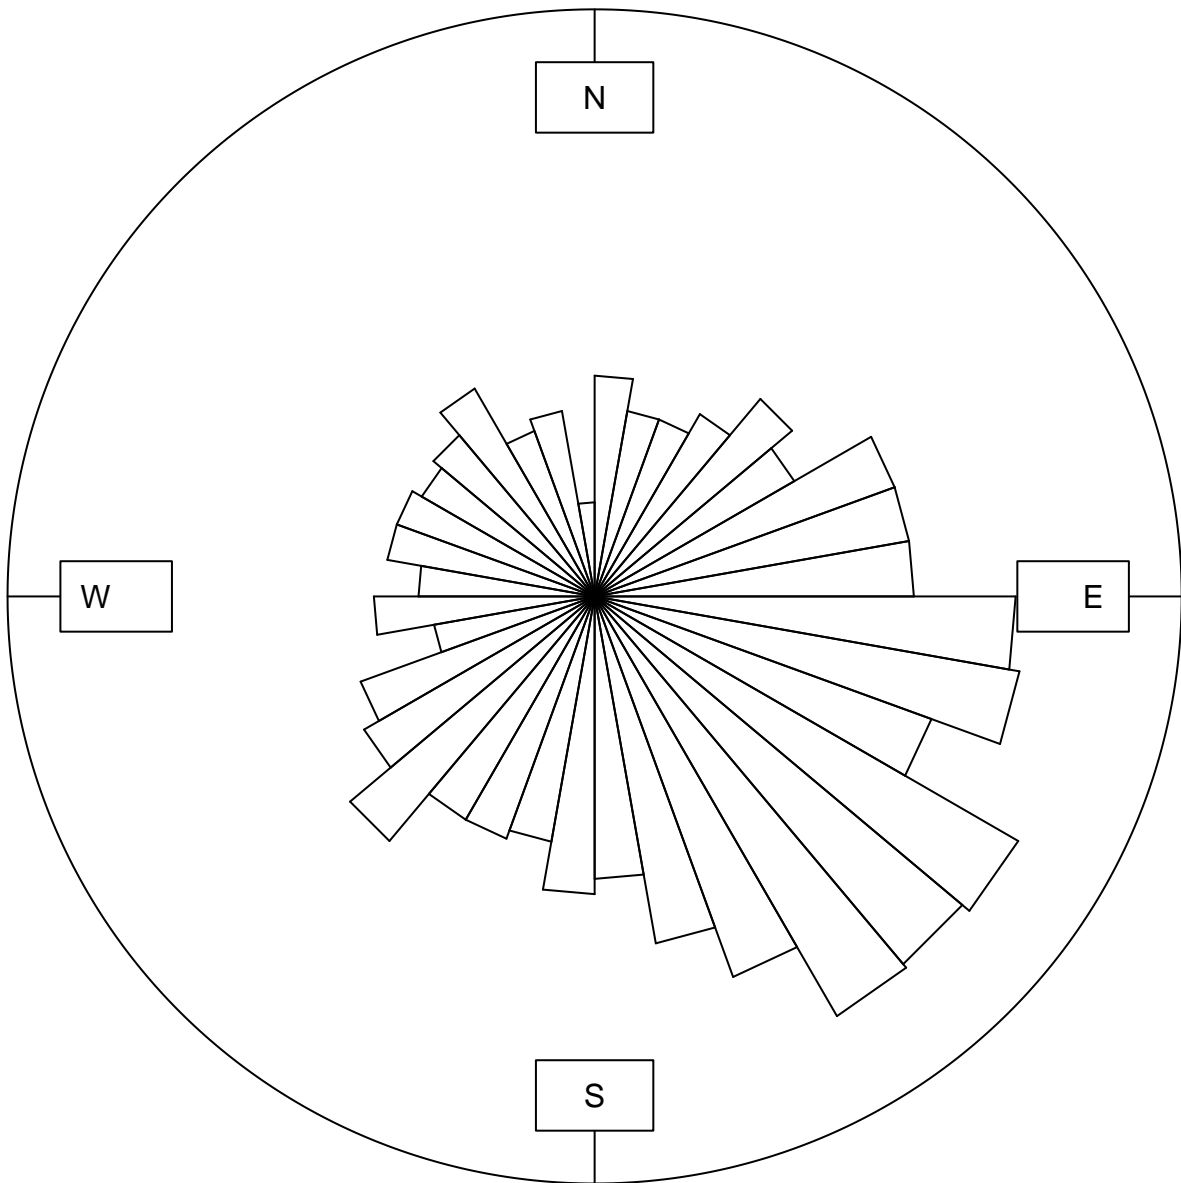

# bootstrap 936

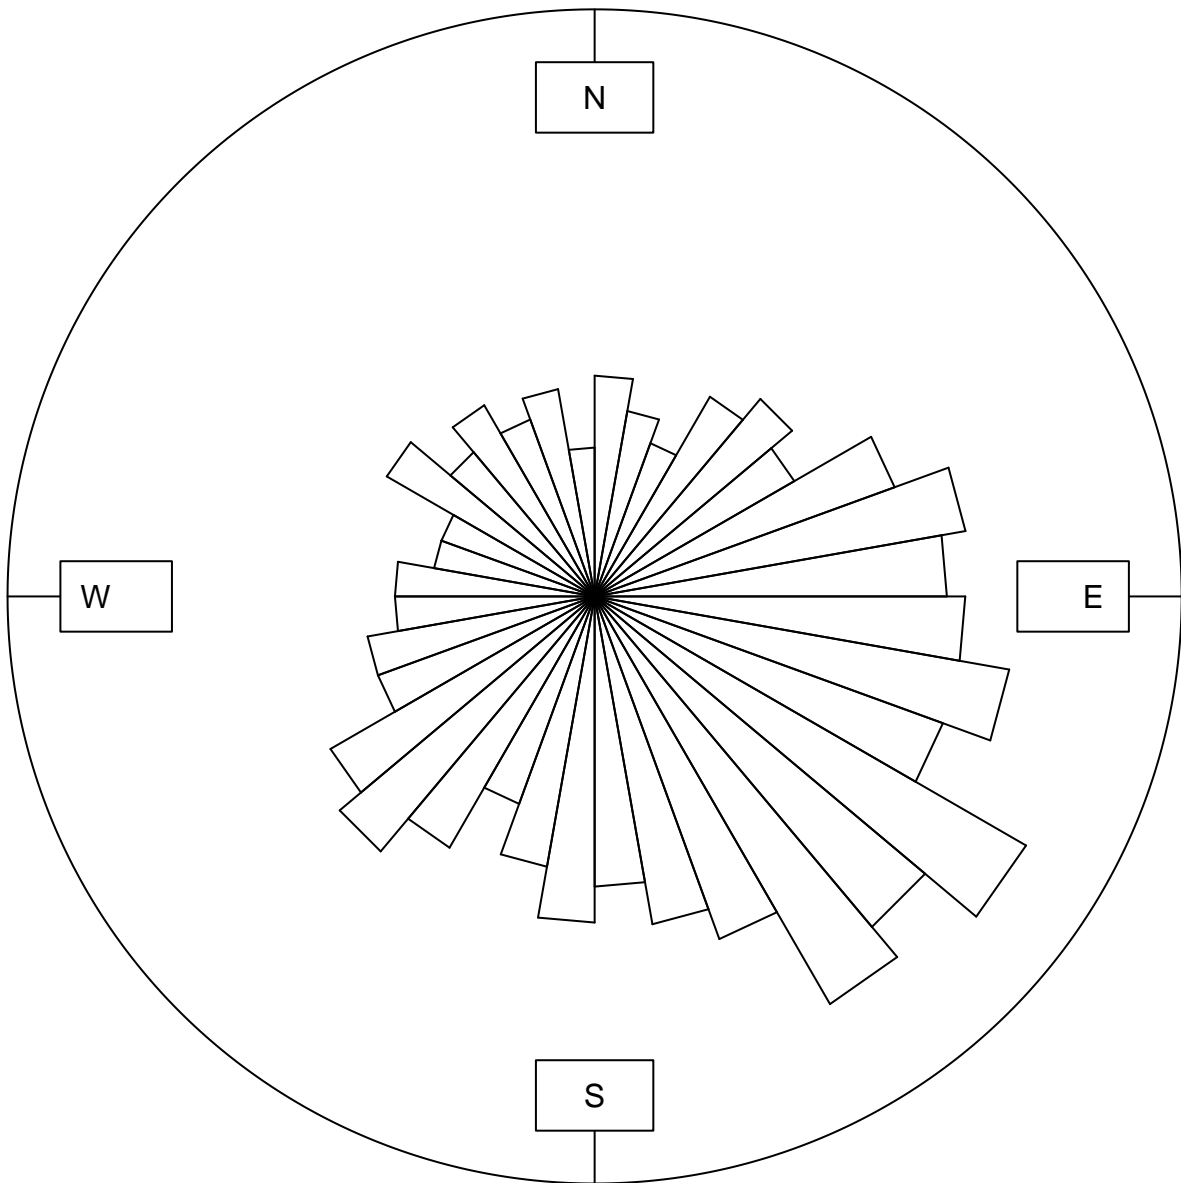



# bootstrap 937

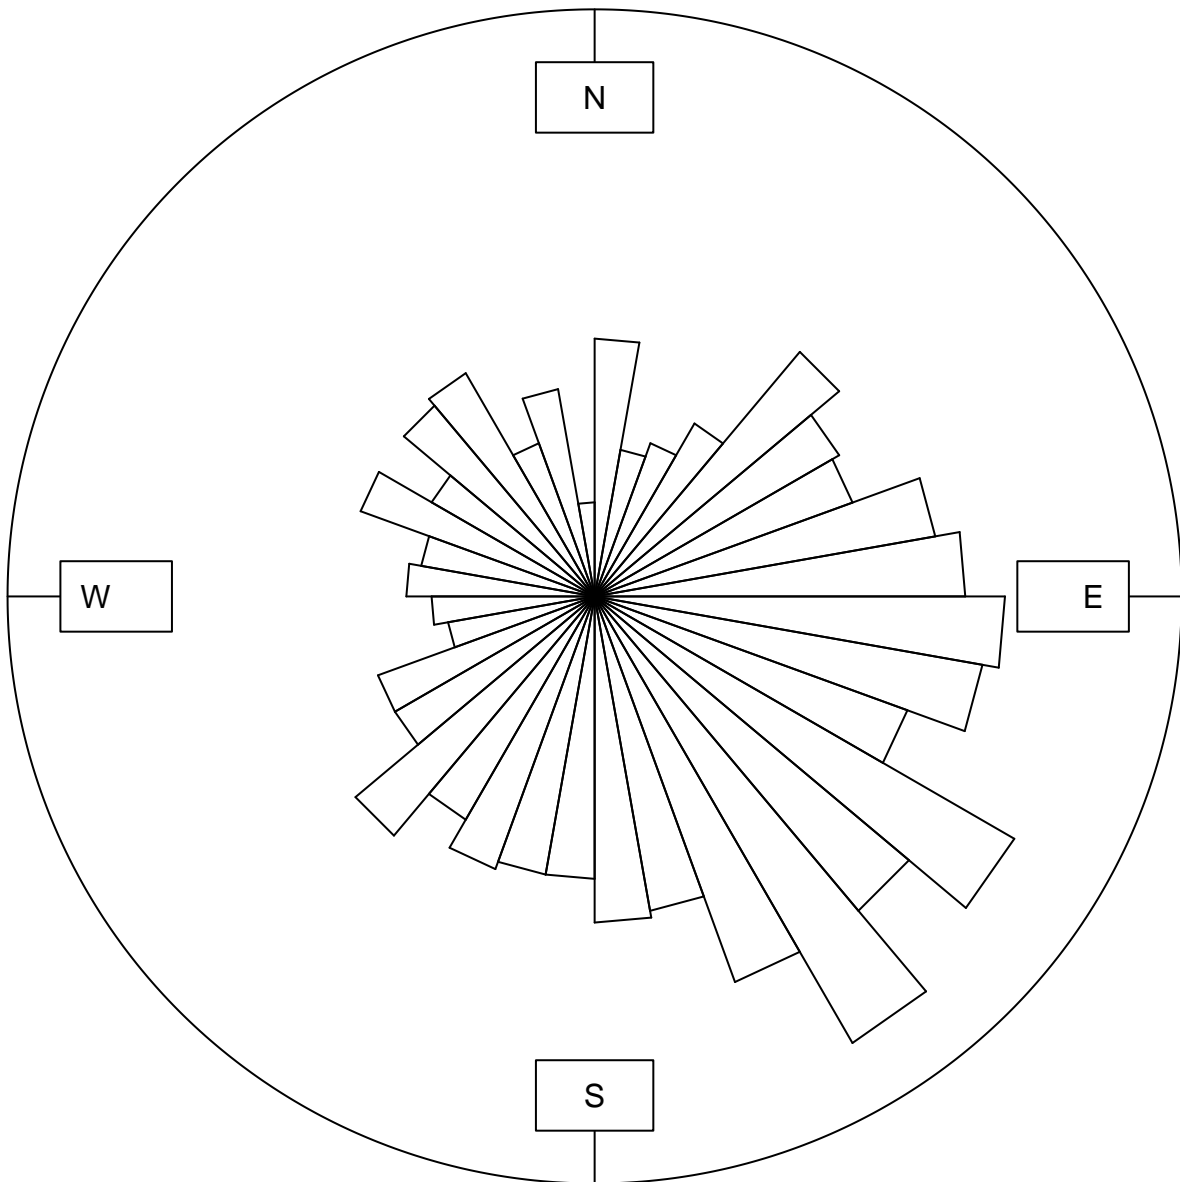

# bootstrap 938

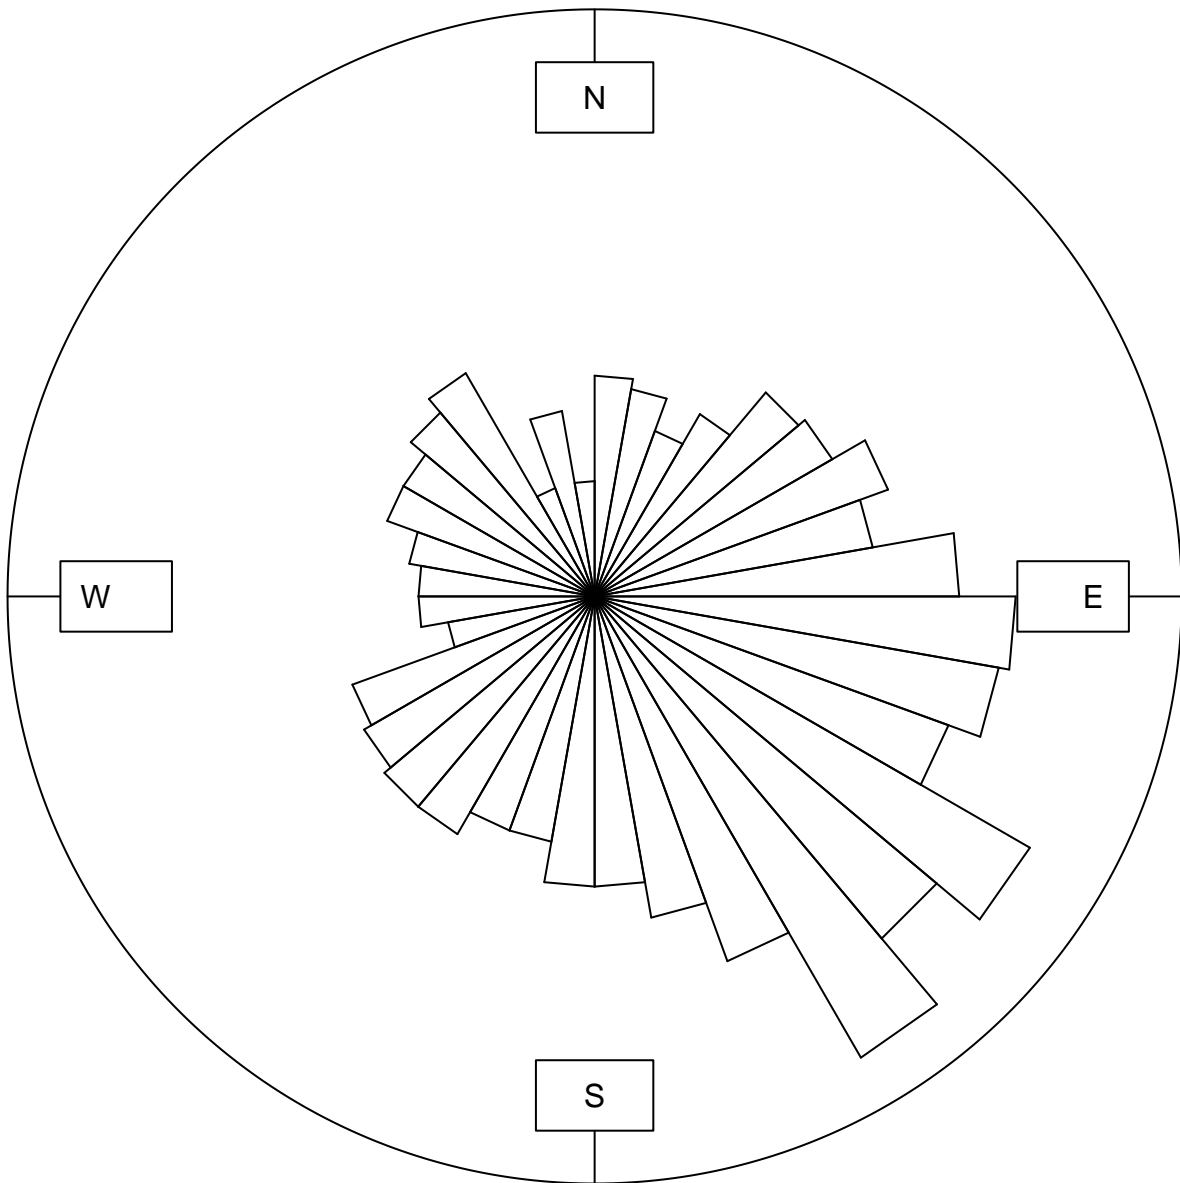

# bootstrap 939

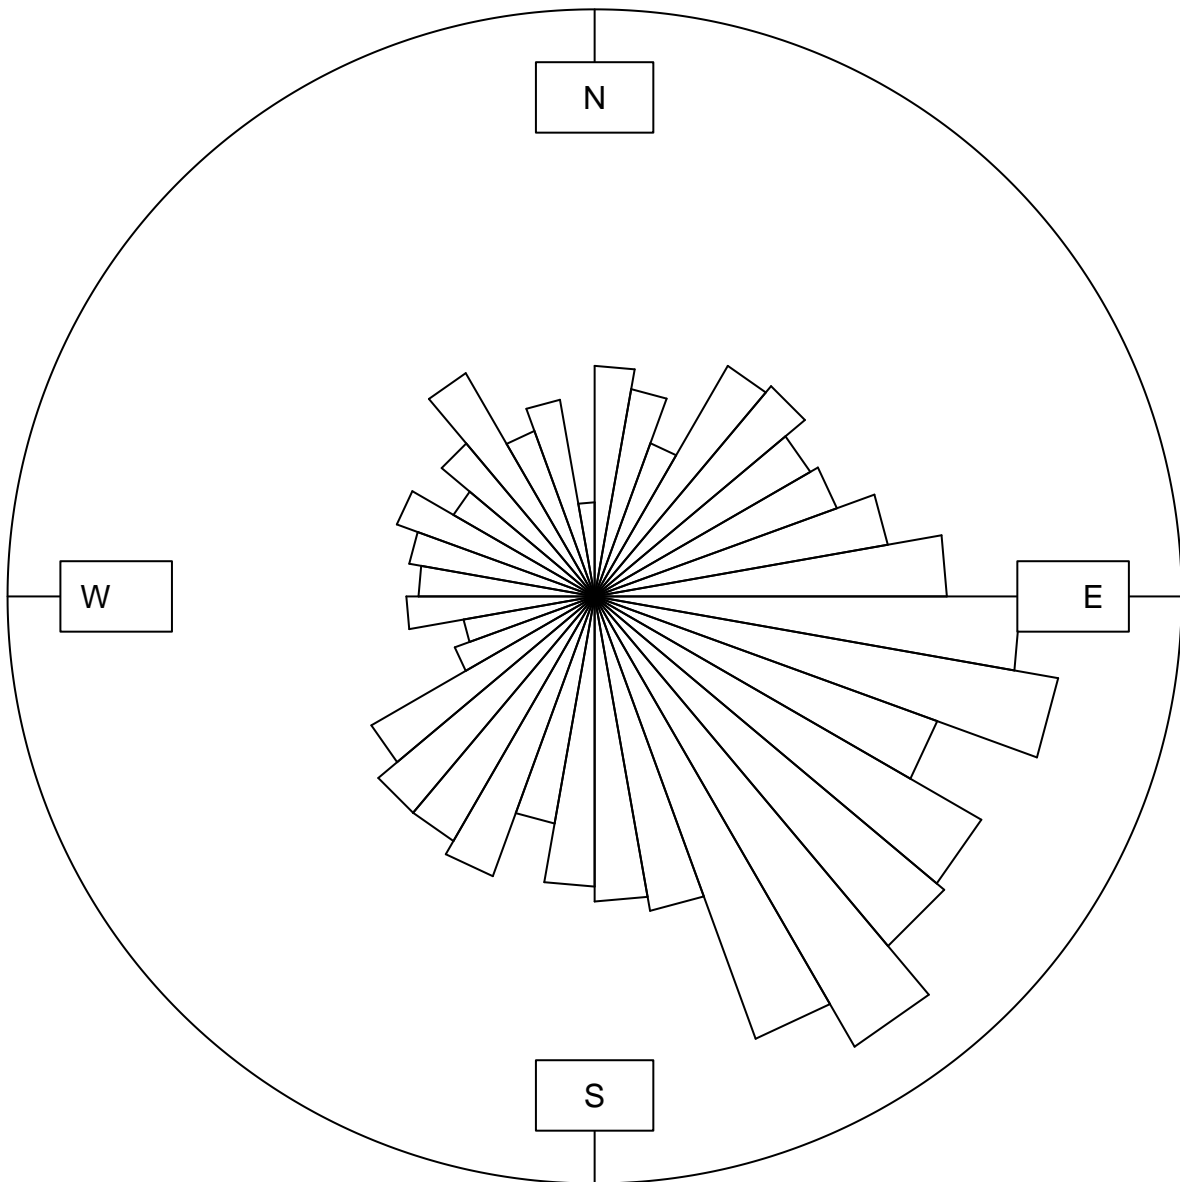

# bootstrap 940

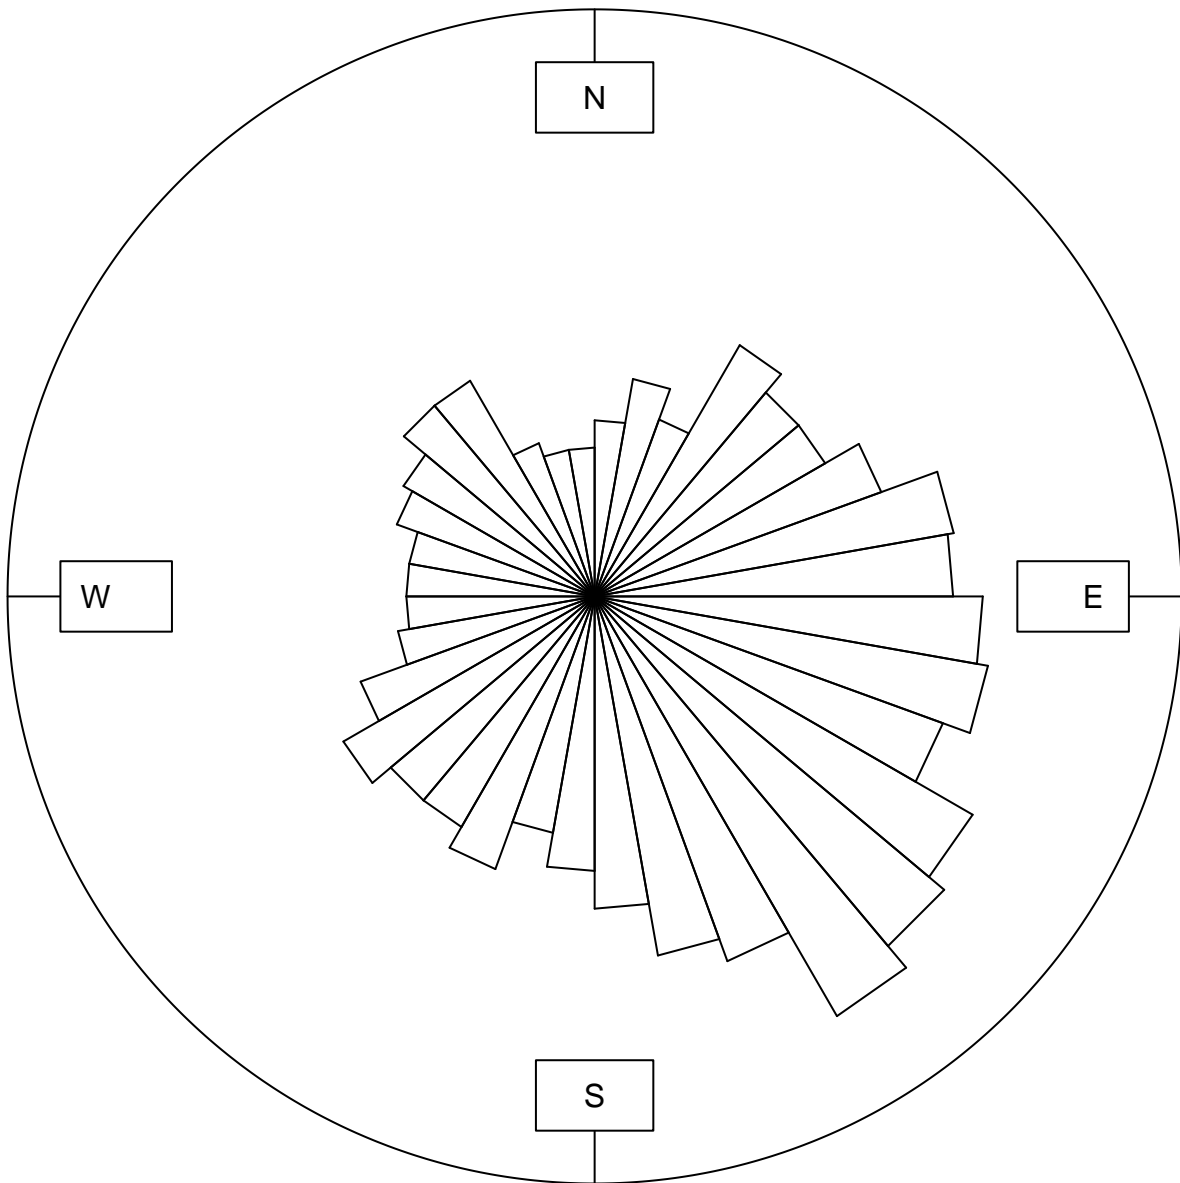

# bootstrap 941

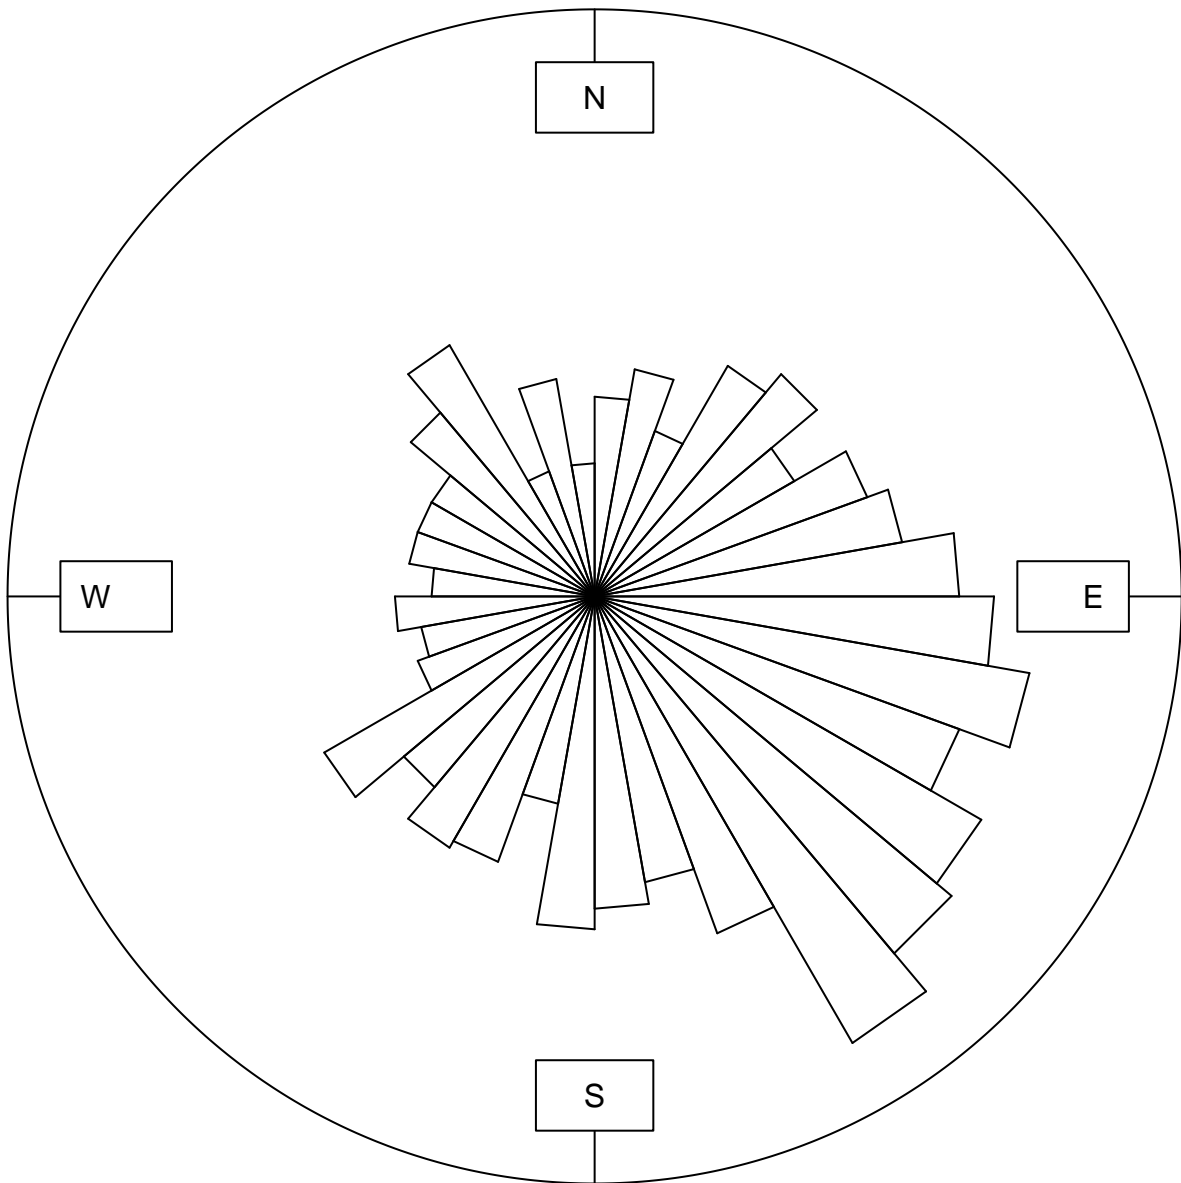

# bootstrap 942

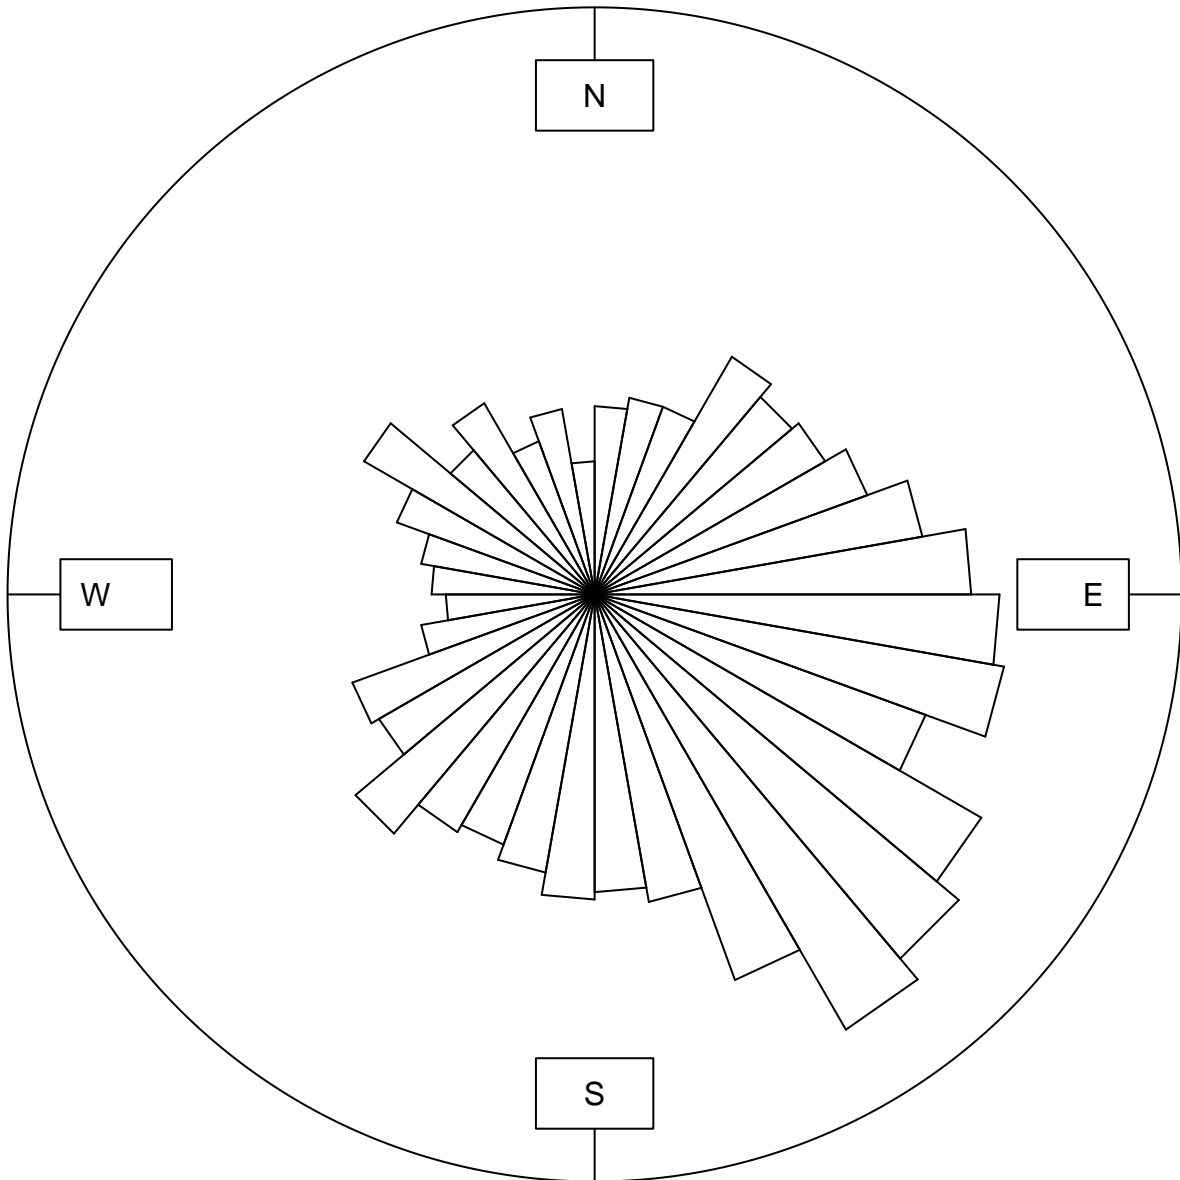

# bootstrap 943

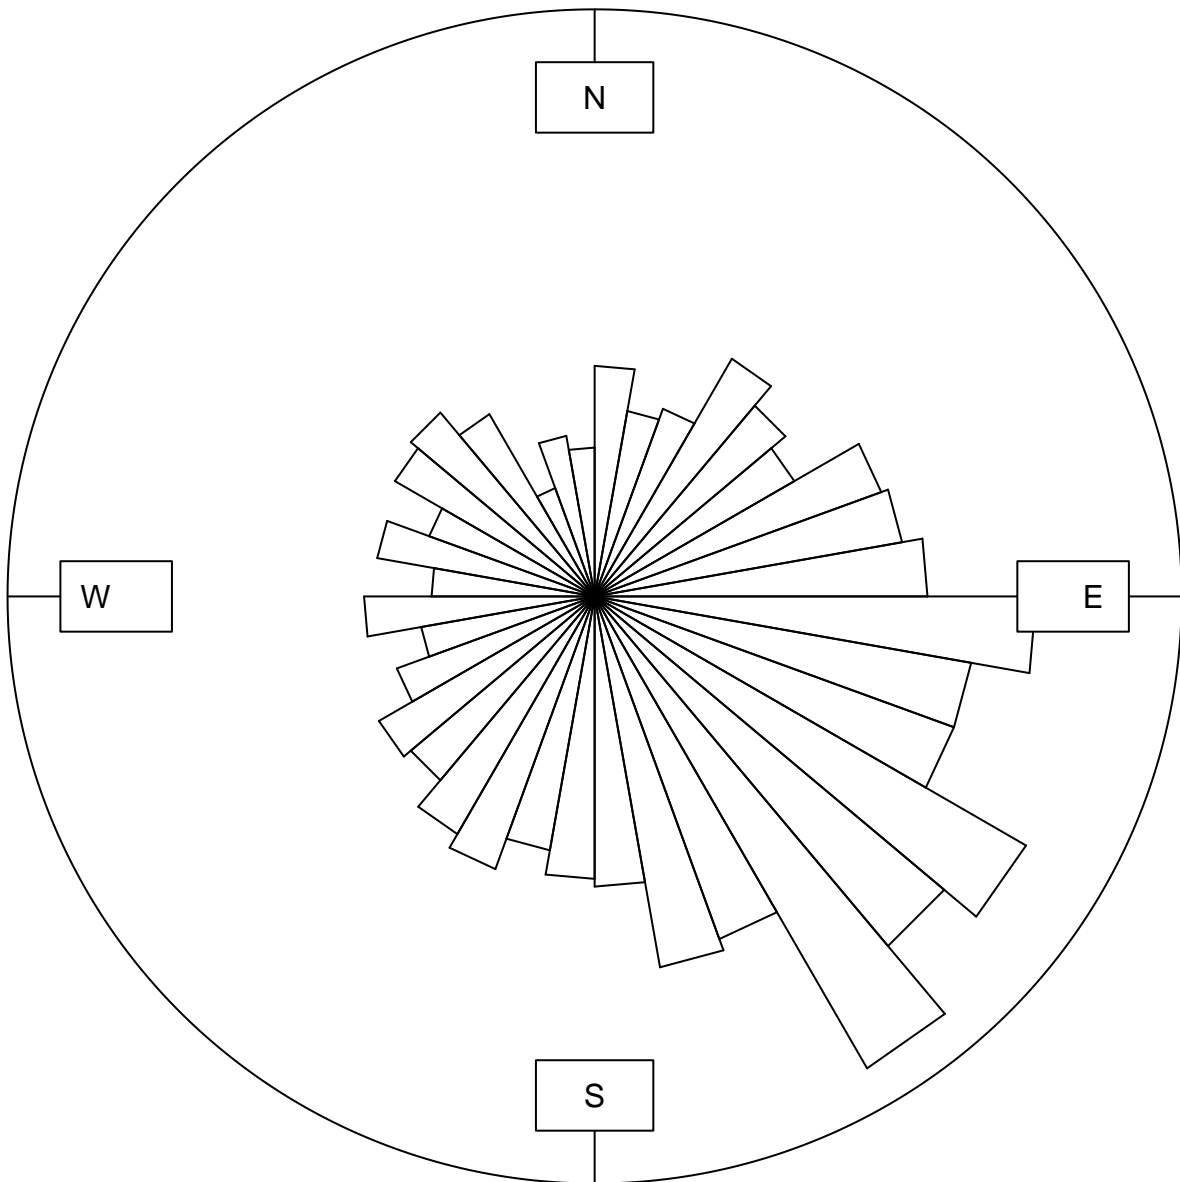

# bootstrap 944

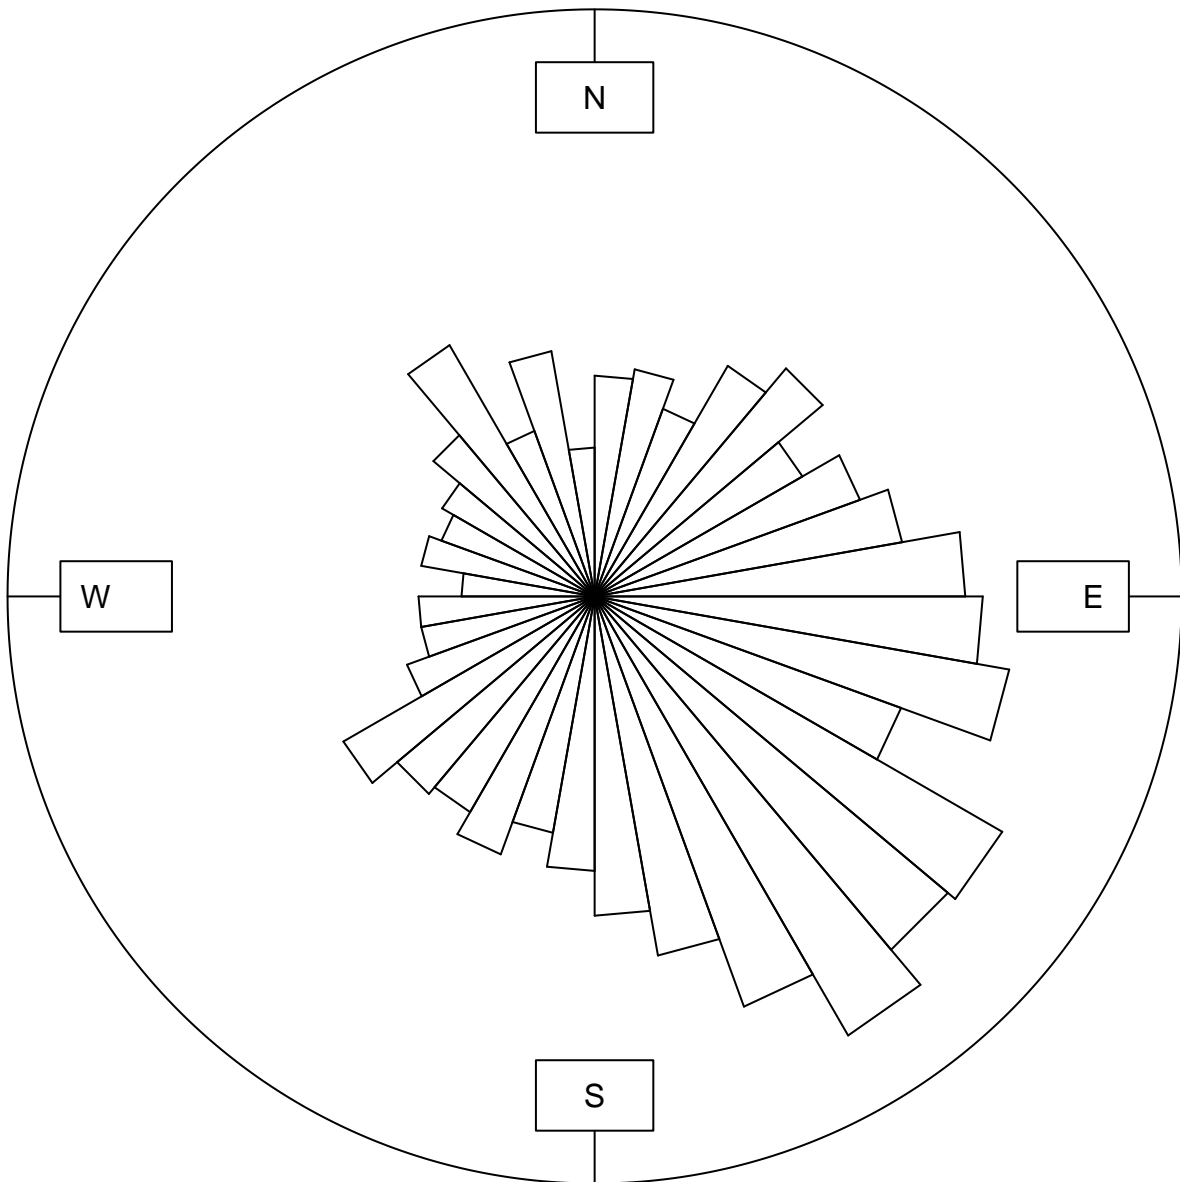



# bootstrap 945

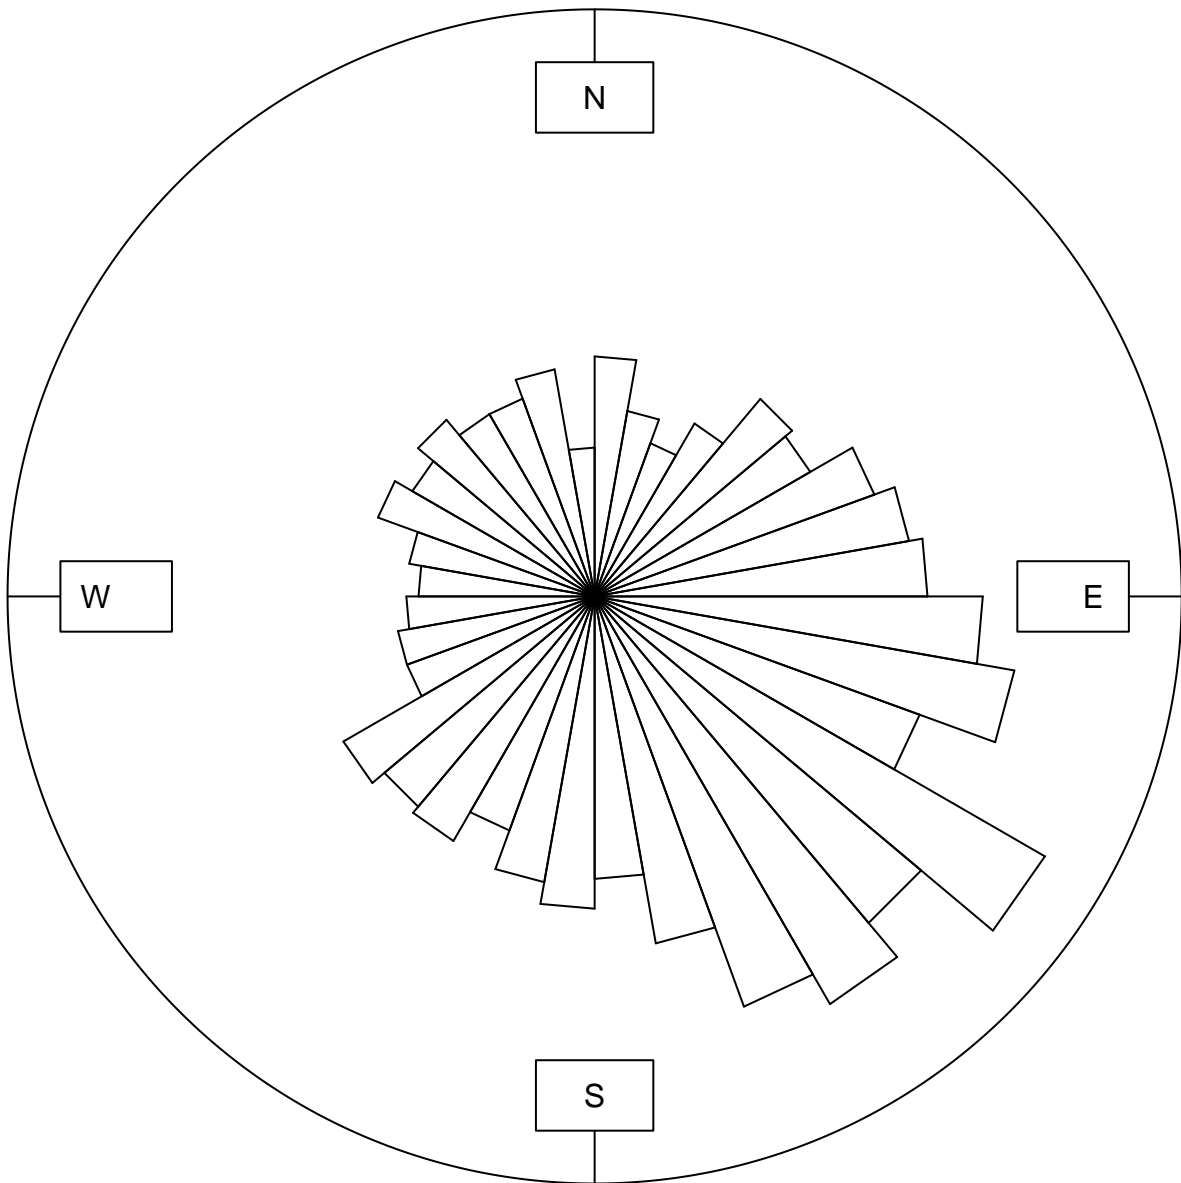

# bootstrap 946

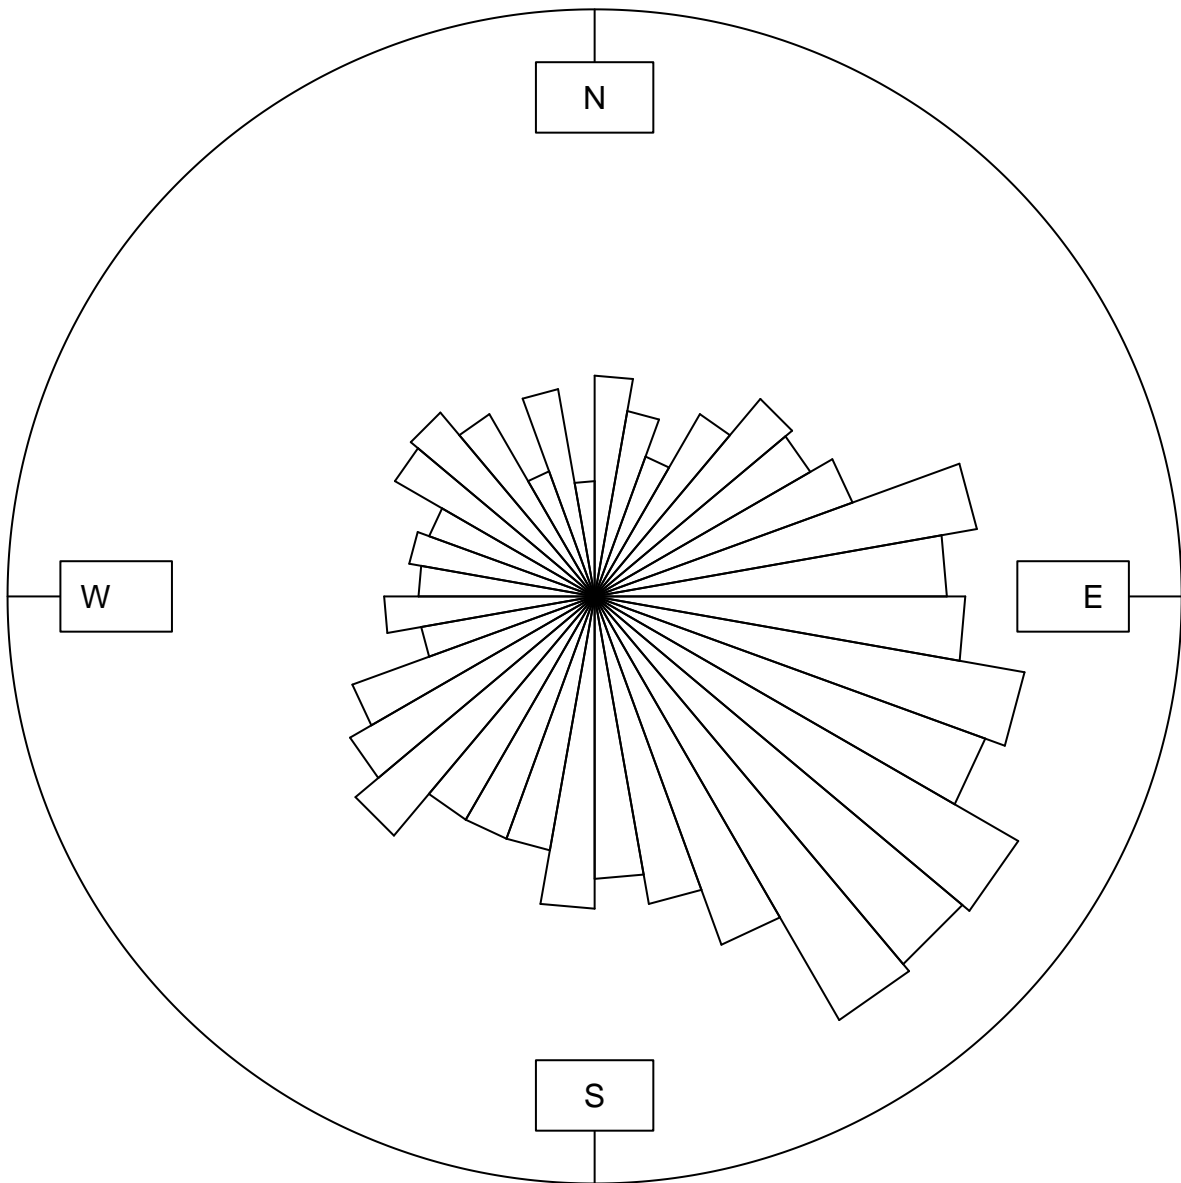

# bootstrap 947

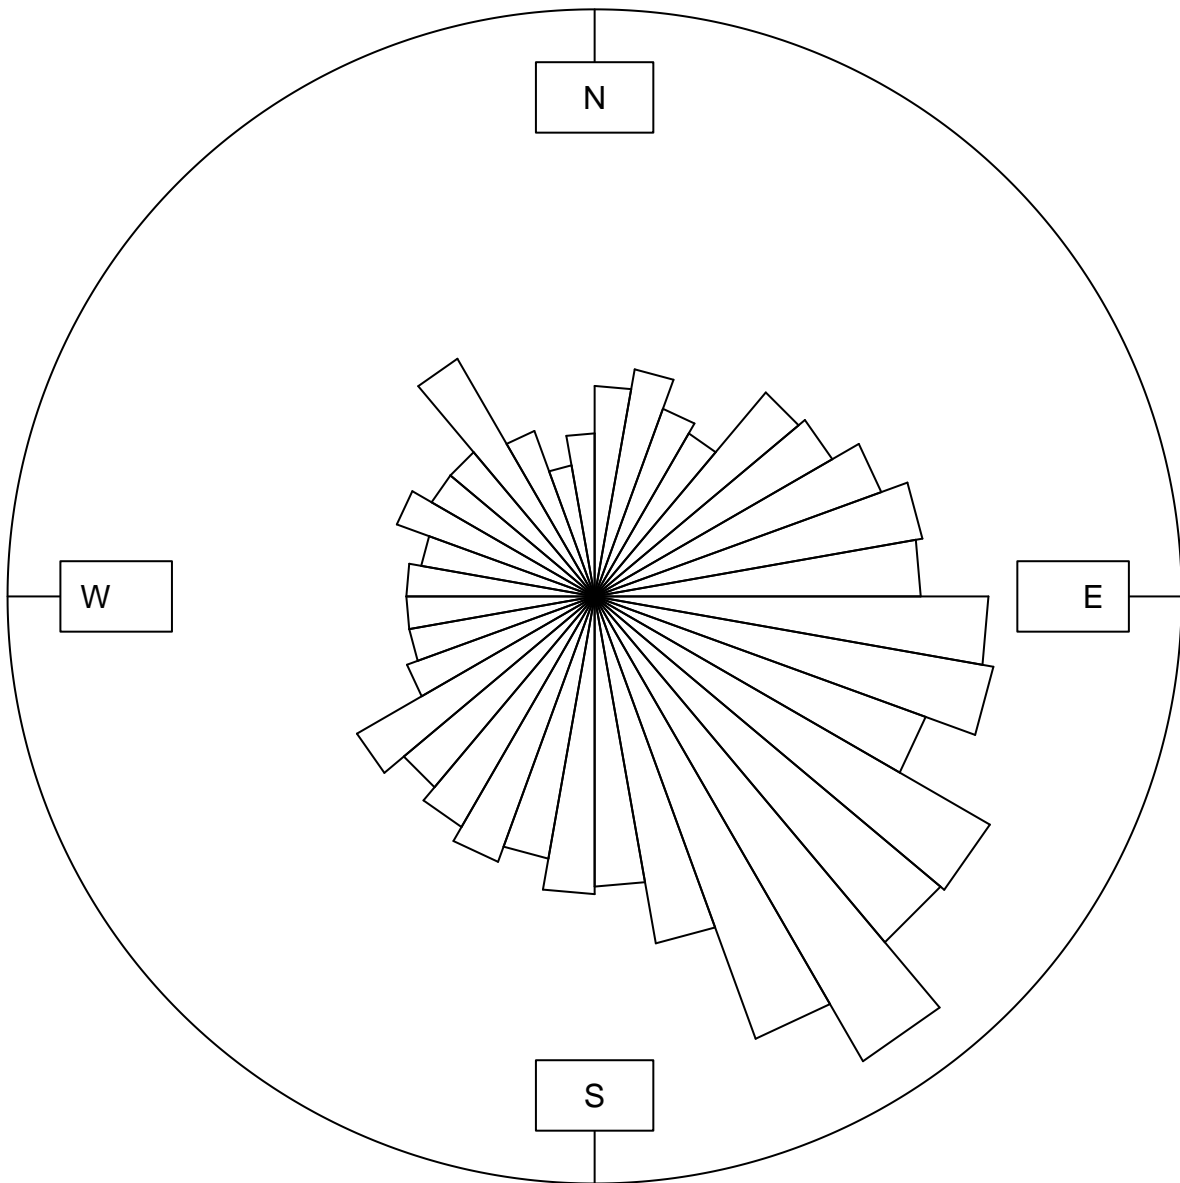

# bootstrap 948

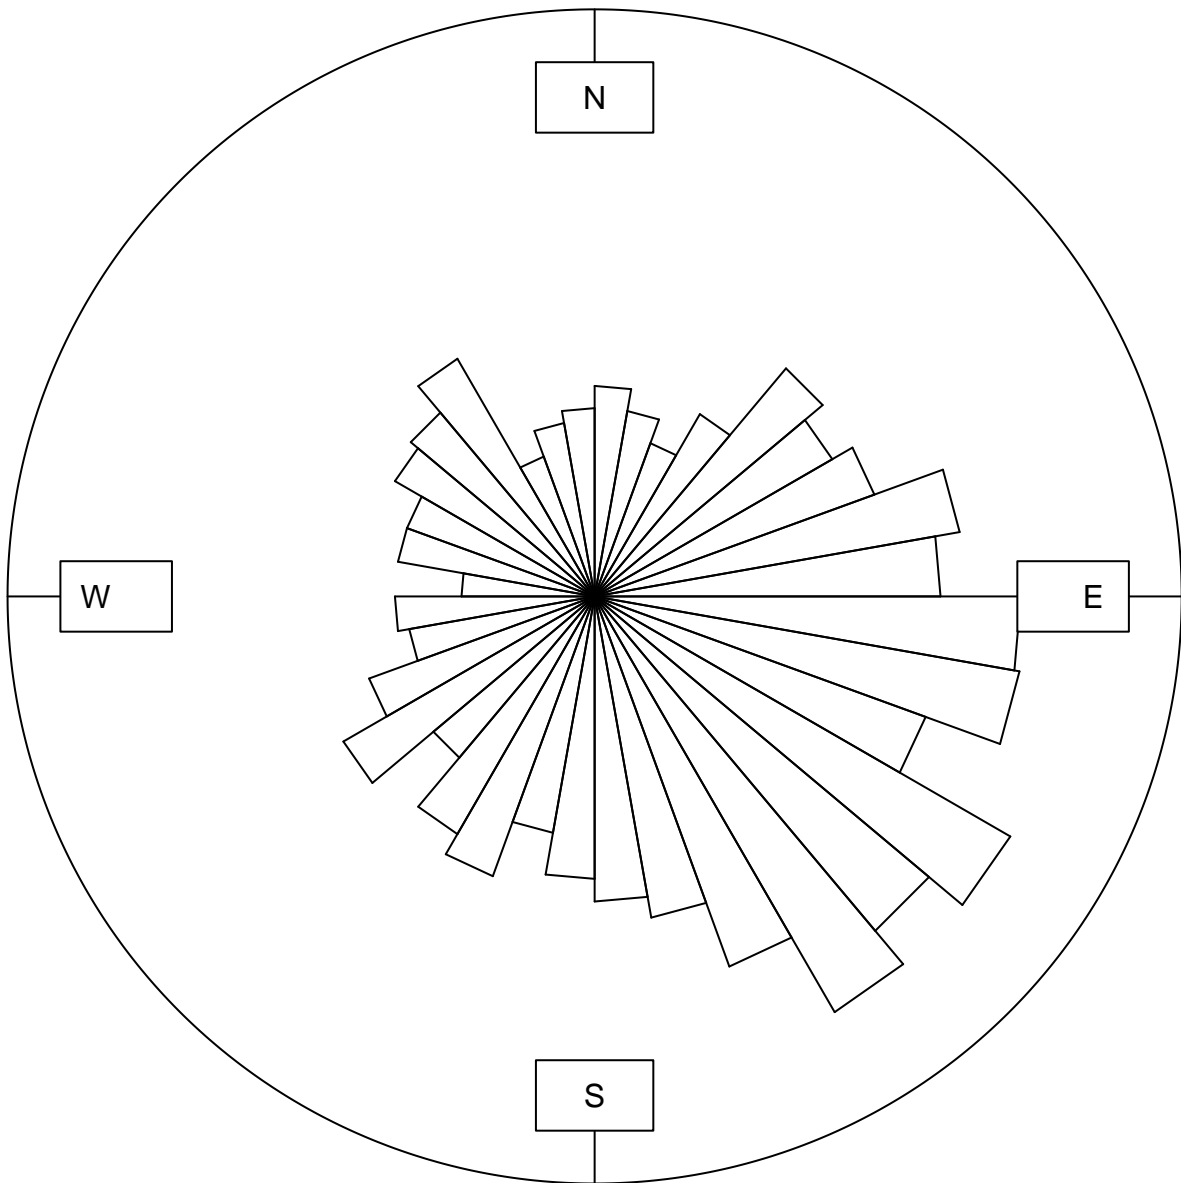

# bootstrap 949

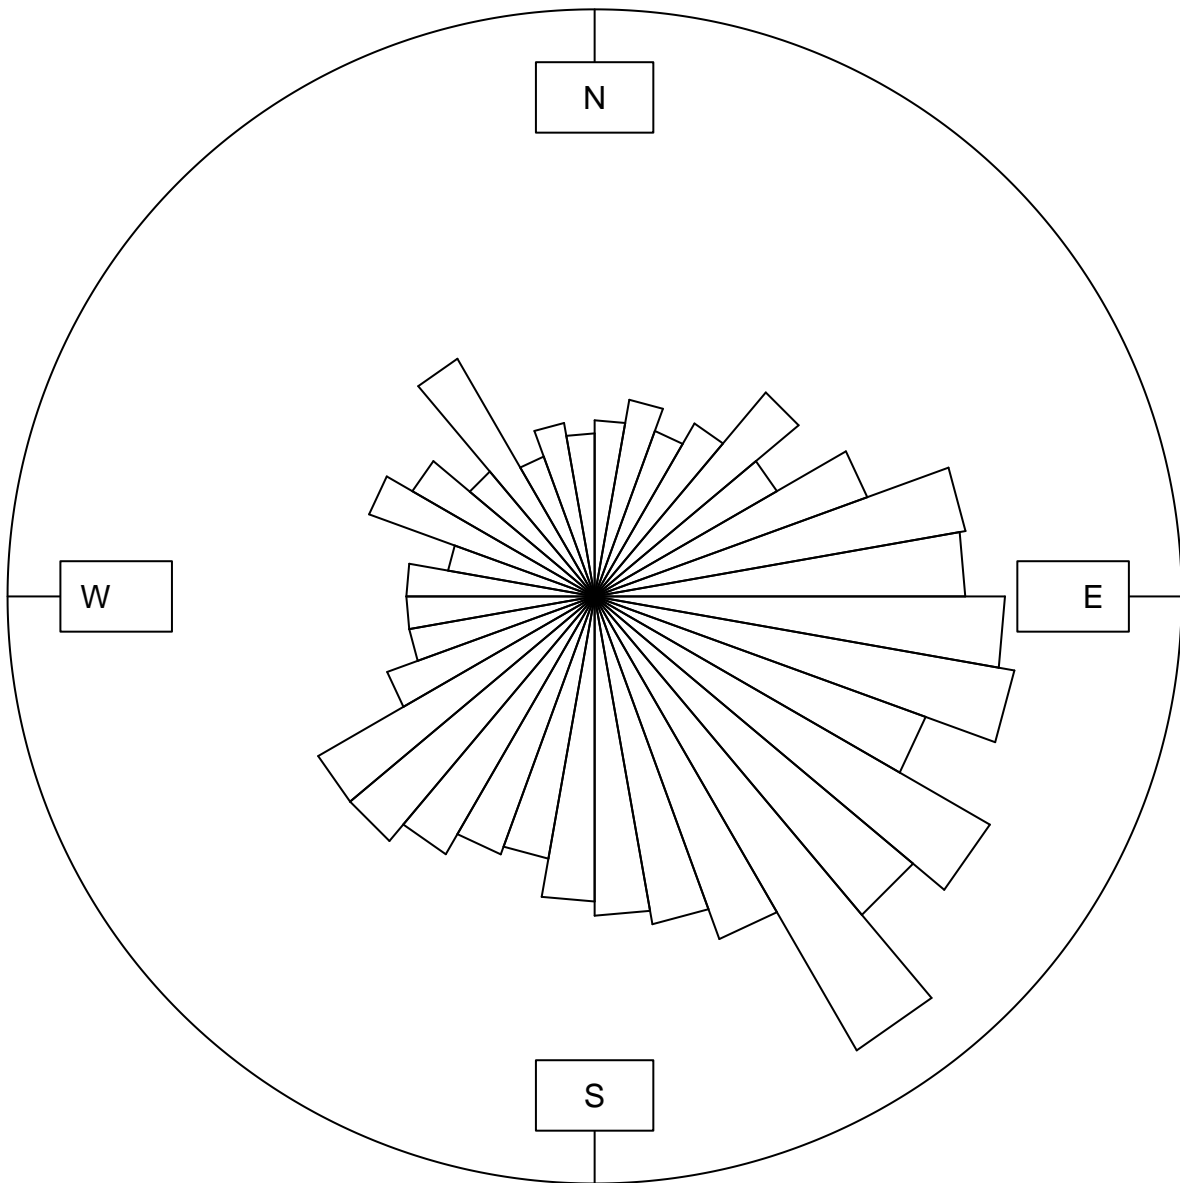

# bootstrap 950

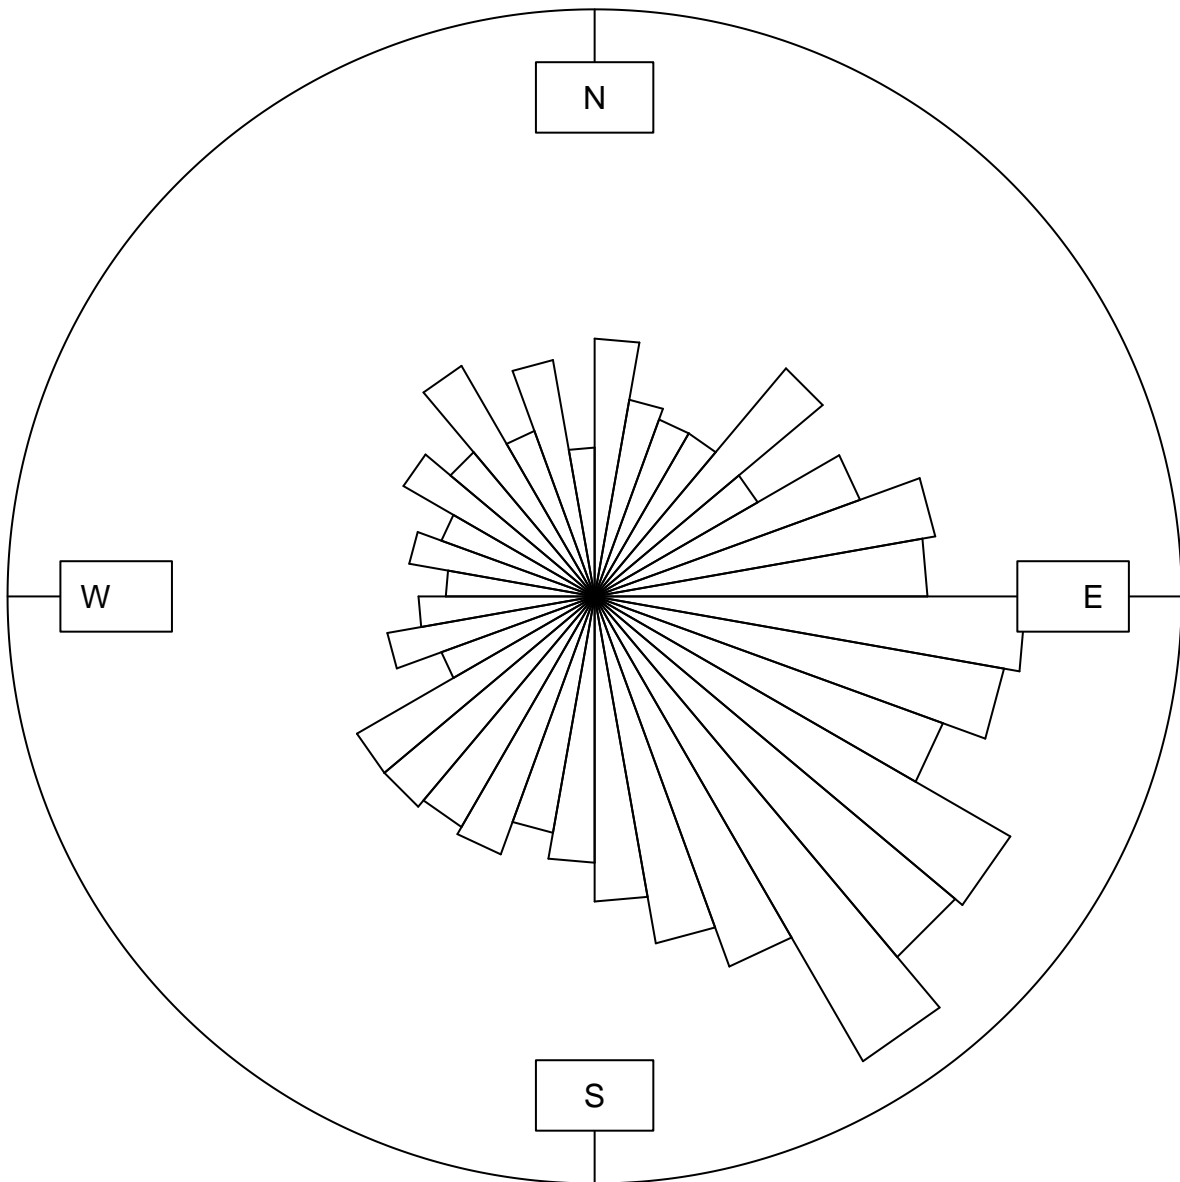

# bootstrap 951

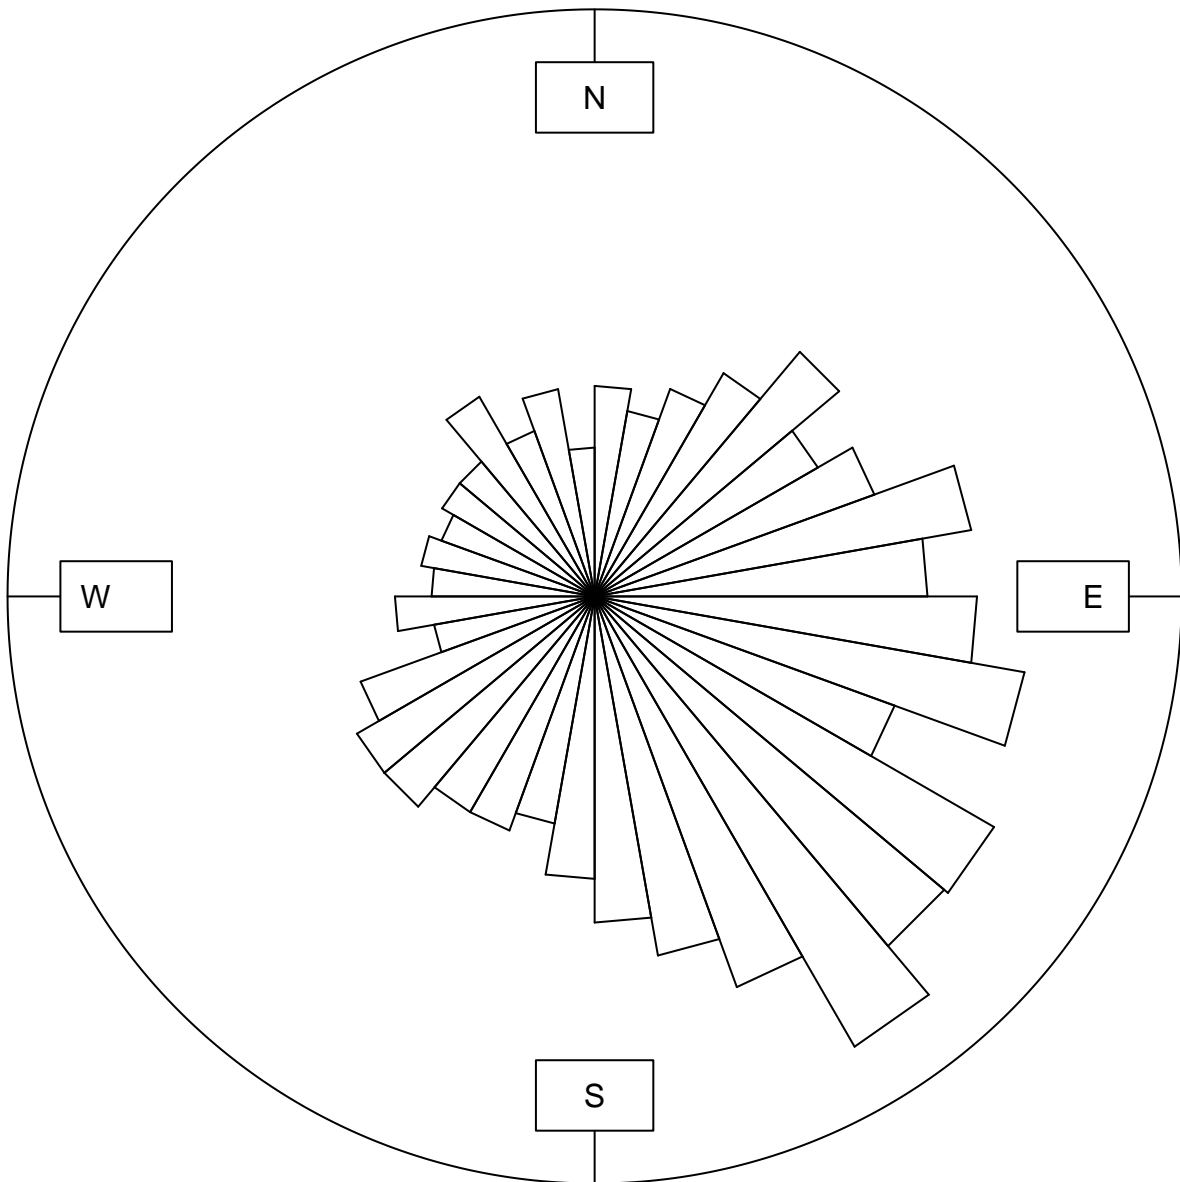

# bootstrap 952

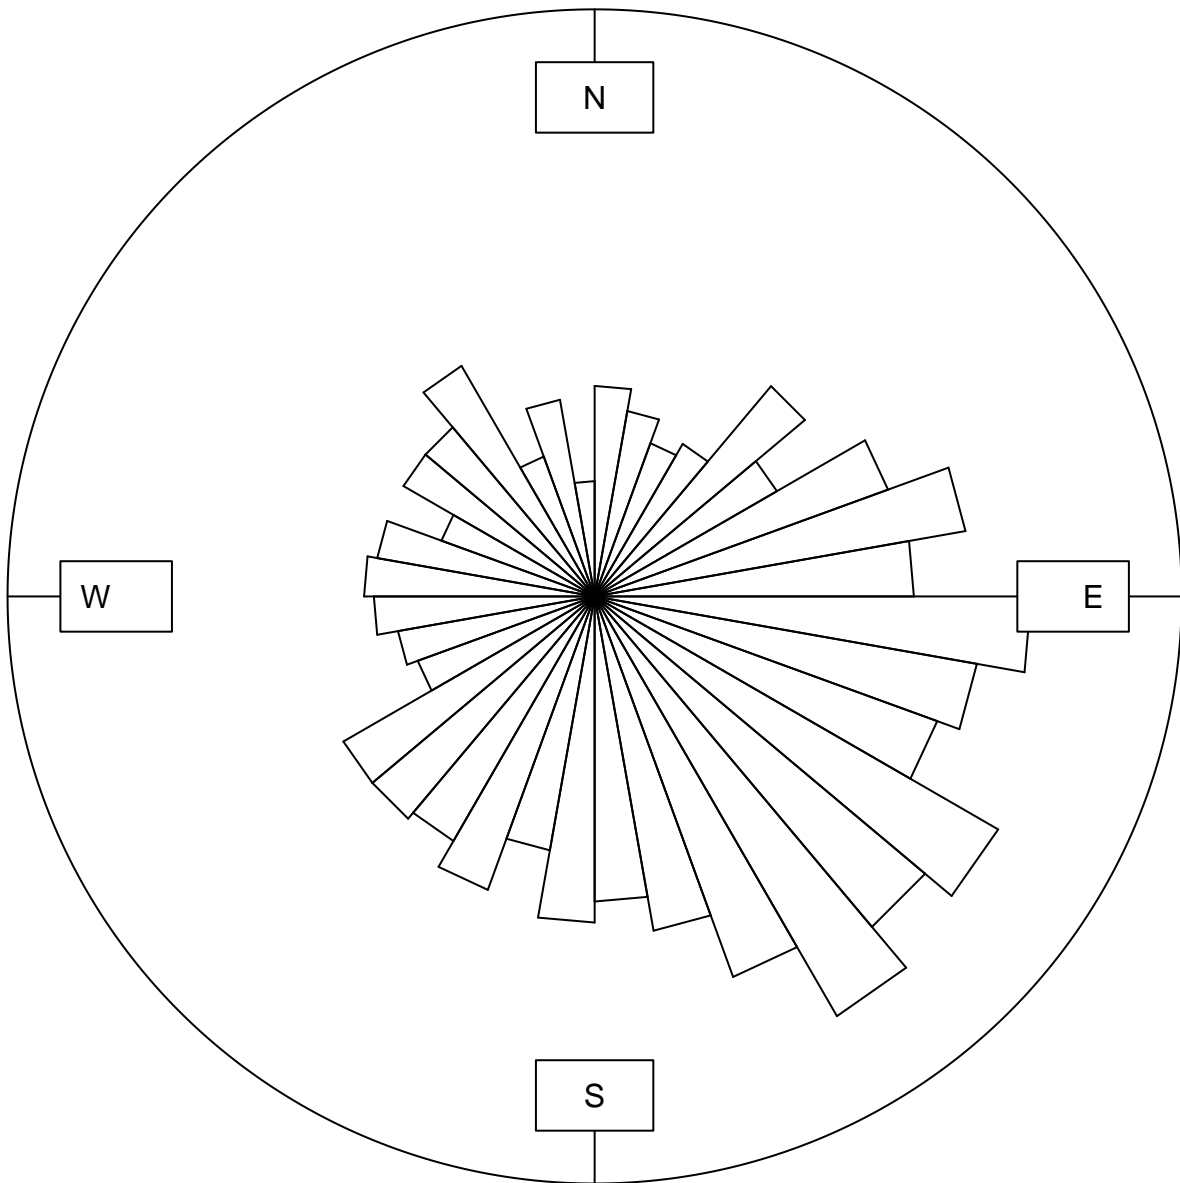



# bootstrap 953

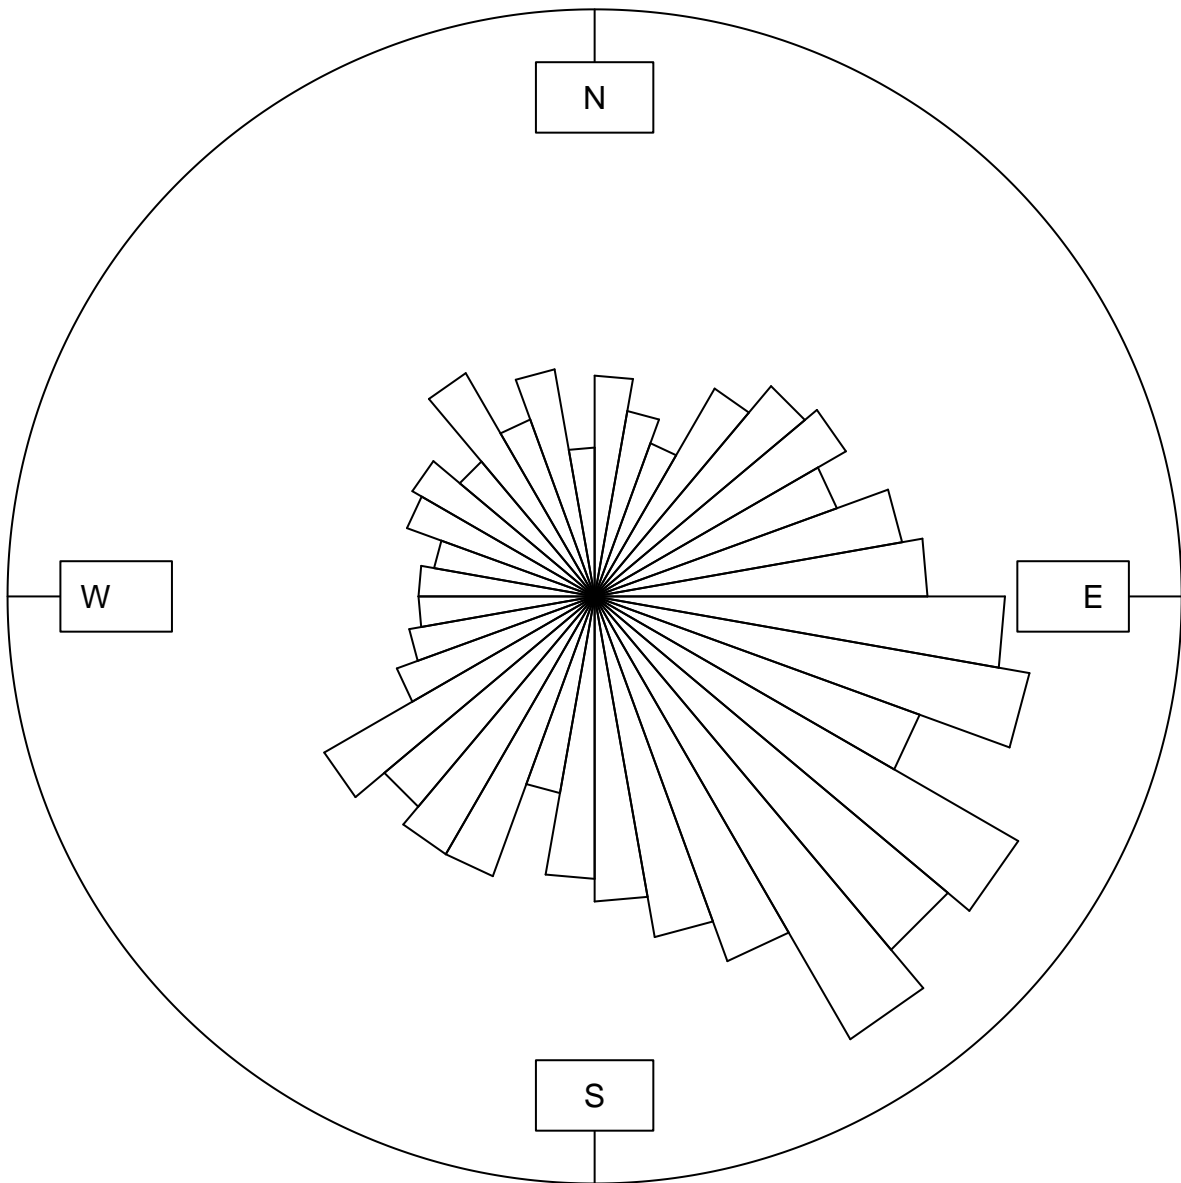

# bootstrap 954

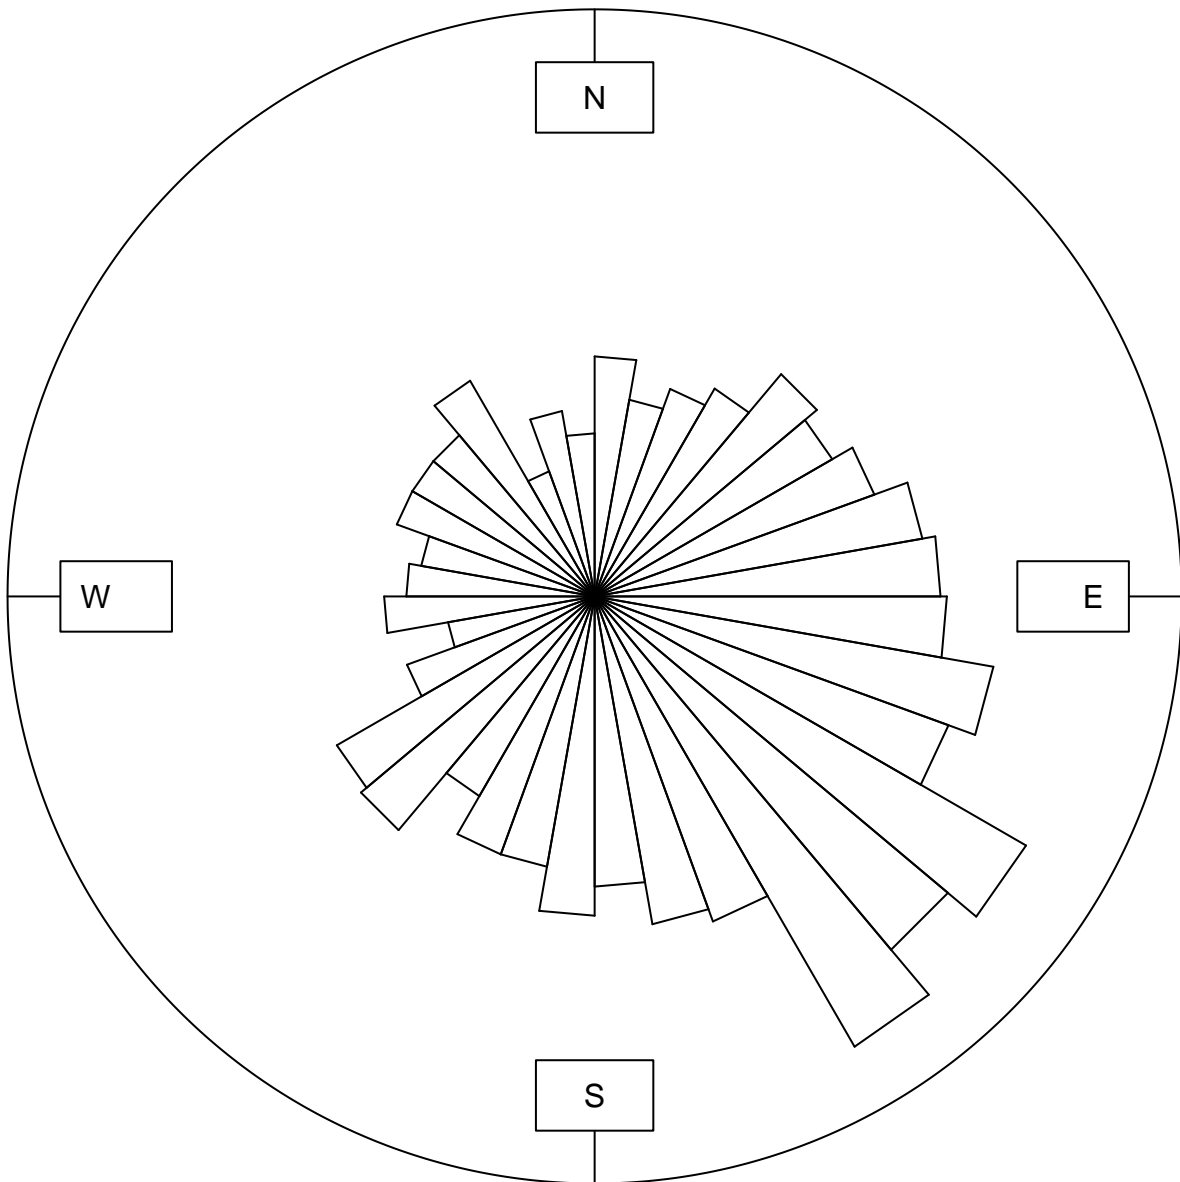

# bootstrap 955

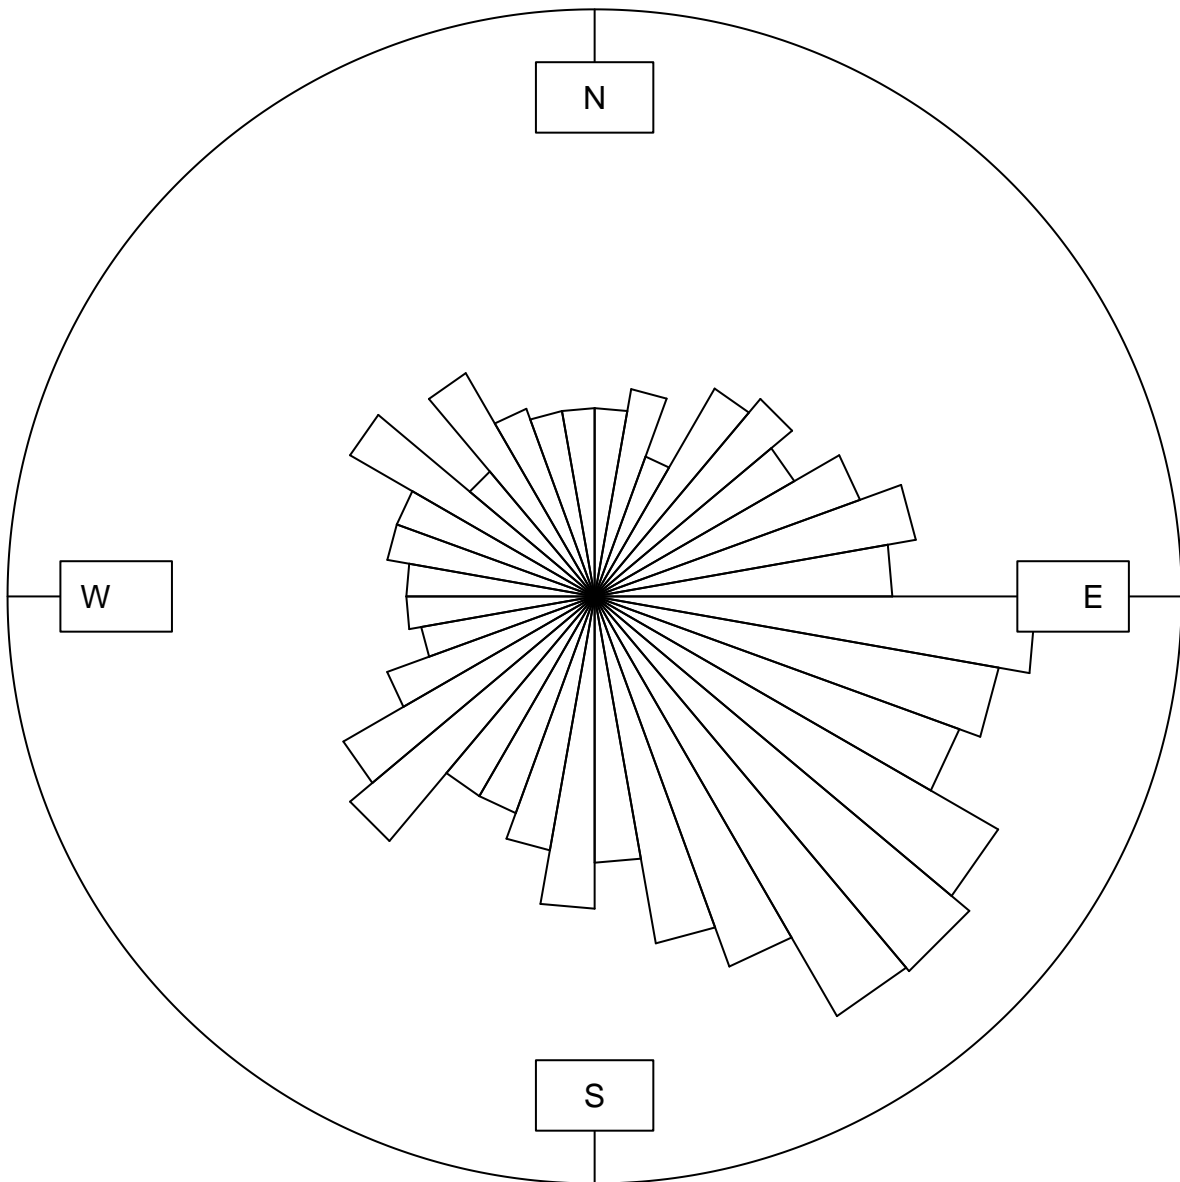

# bootstrap 956

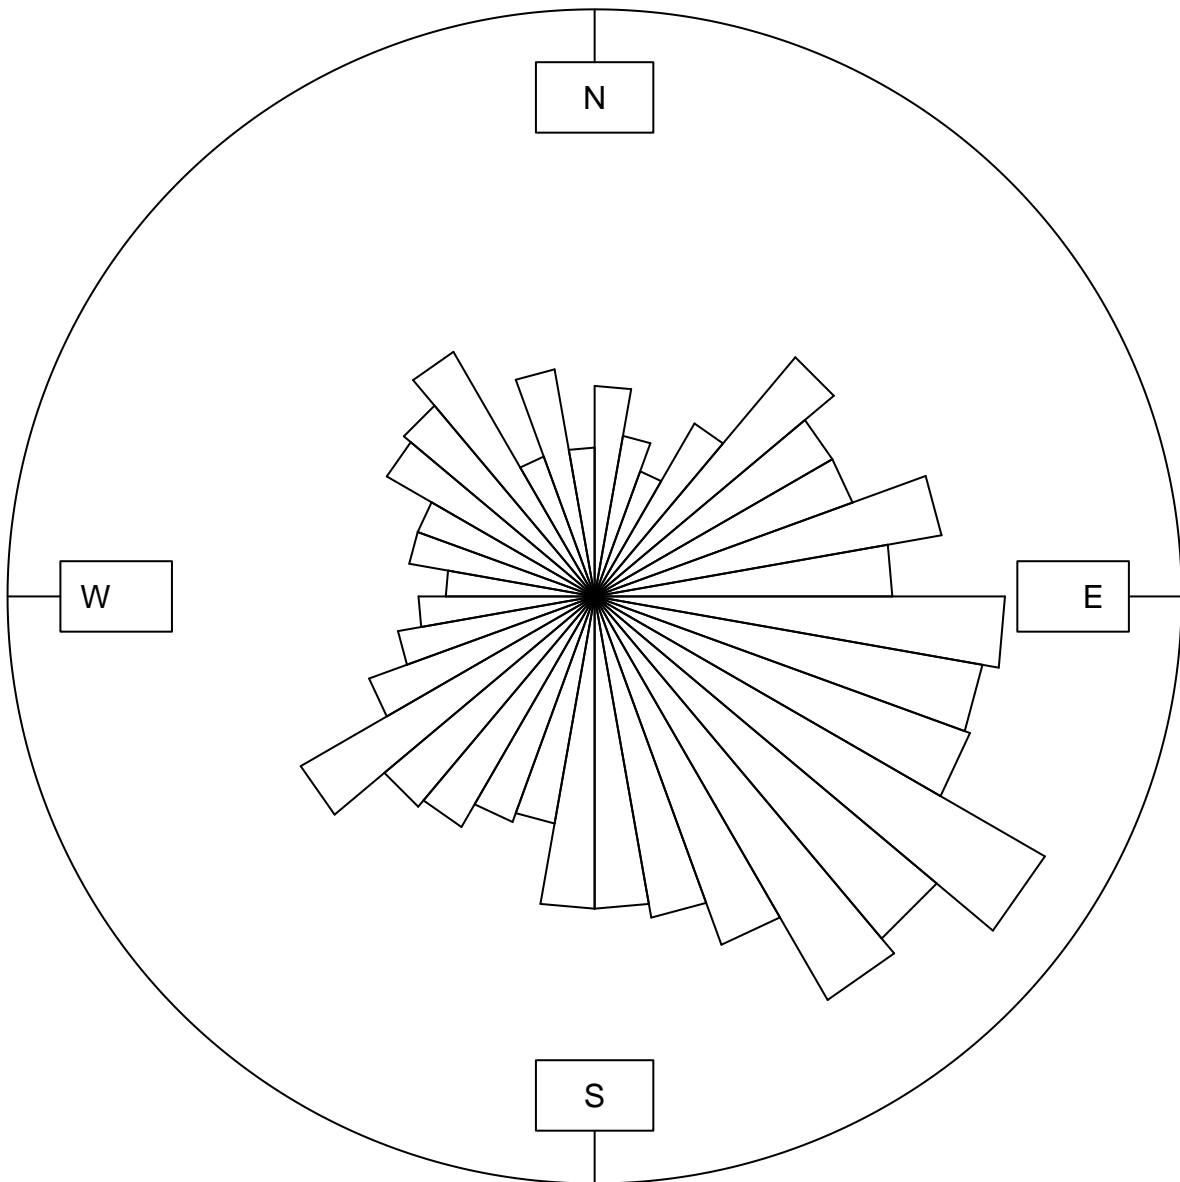

# bootstrap 957

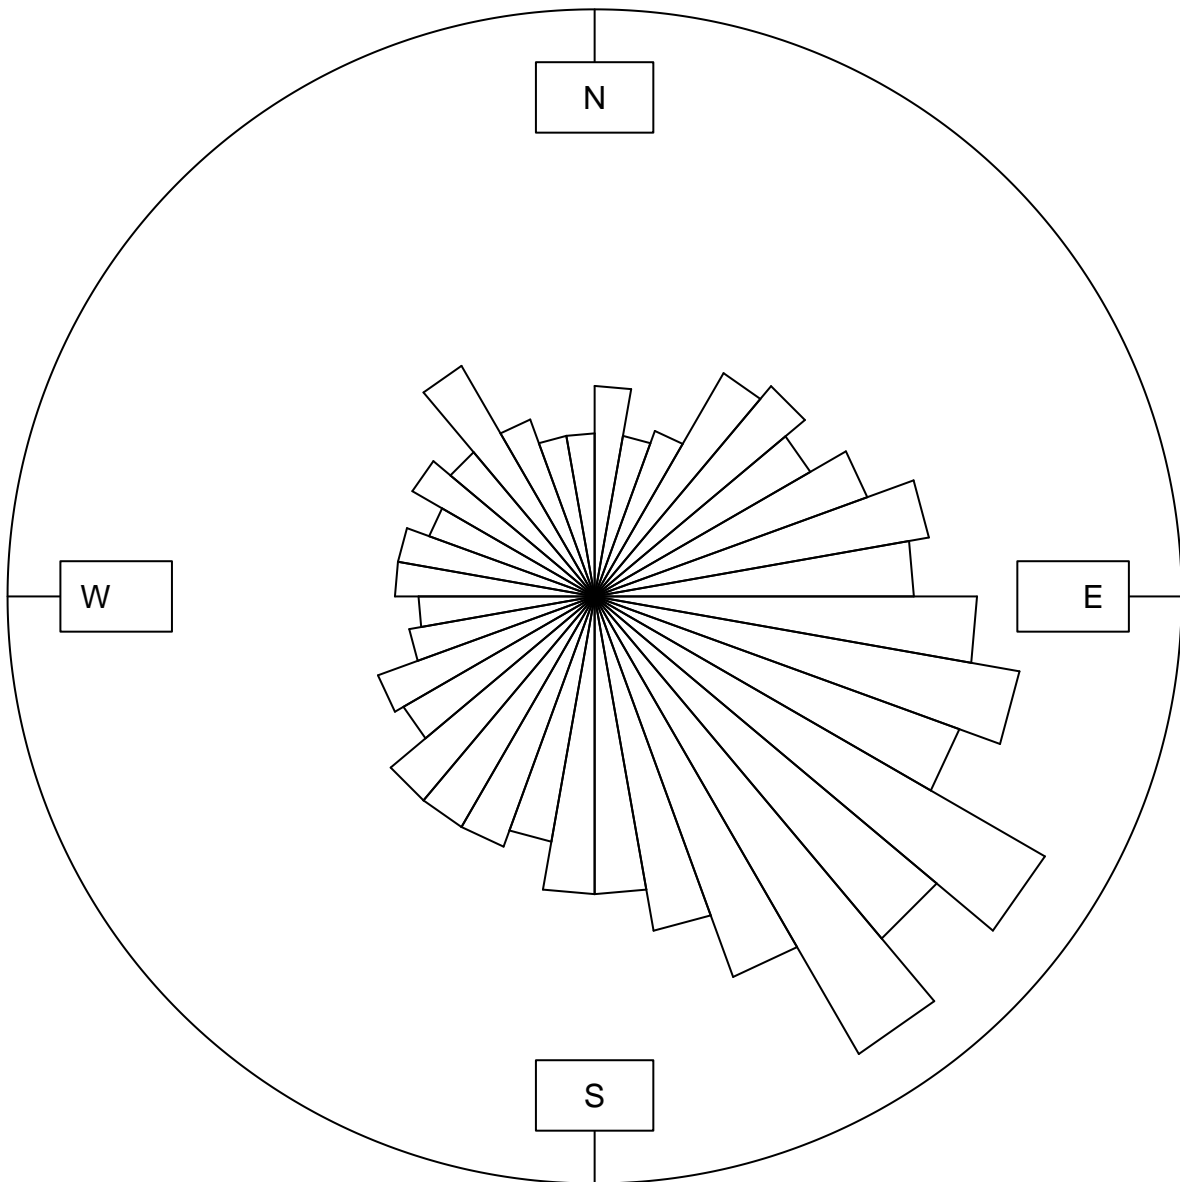

# bootstrap 958

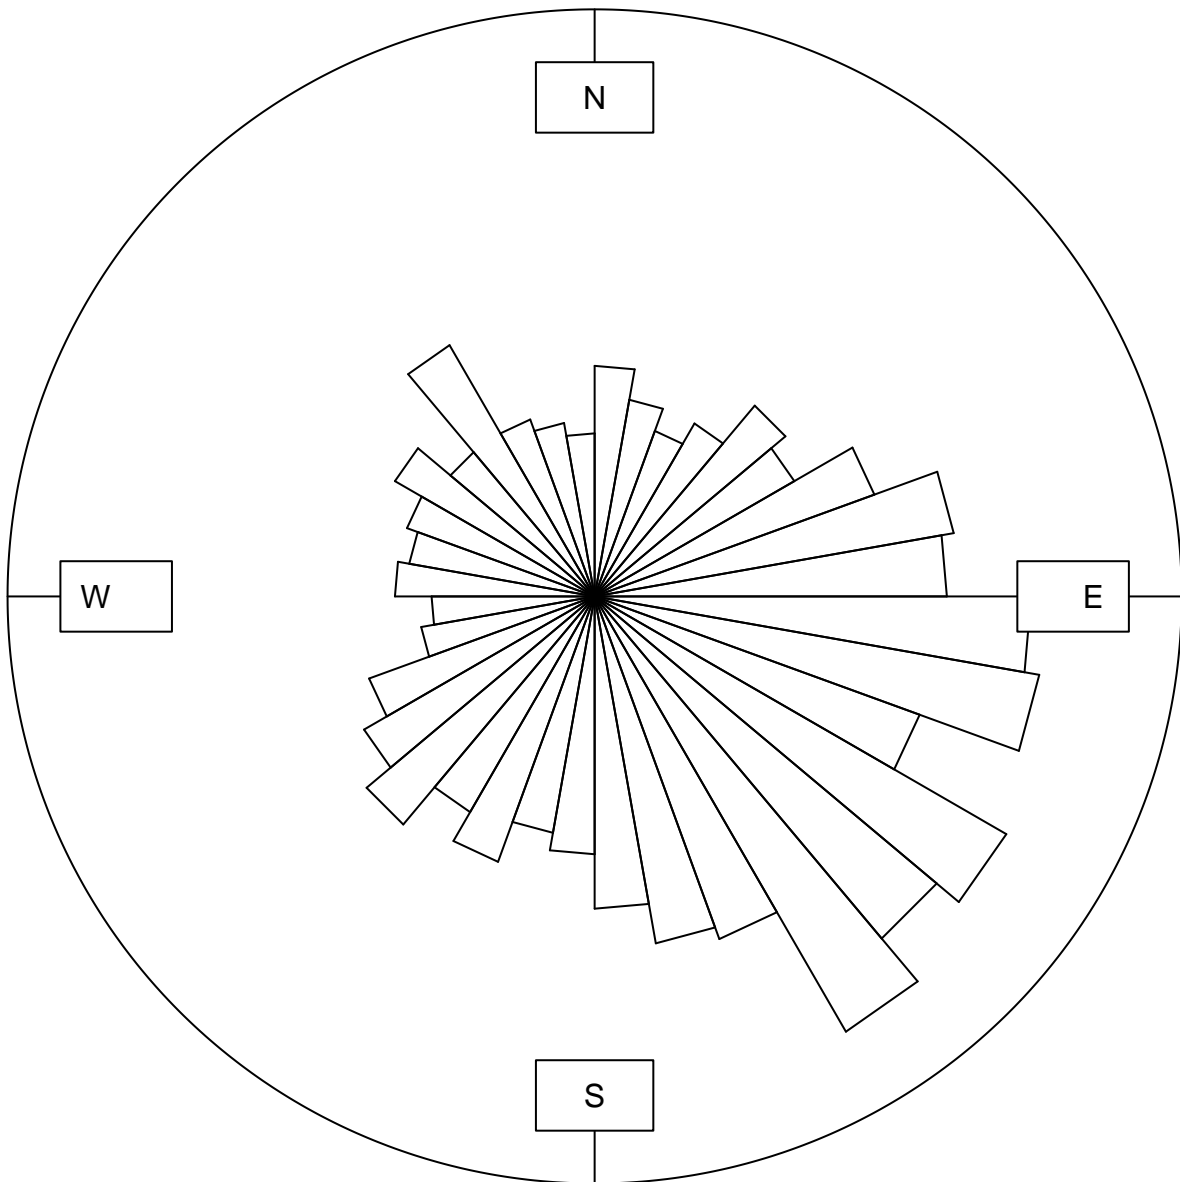

# bootstrap 959

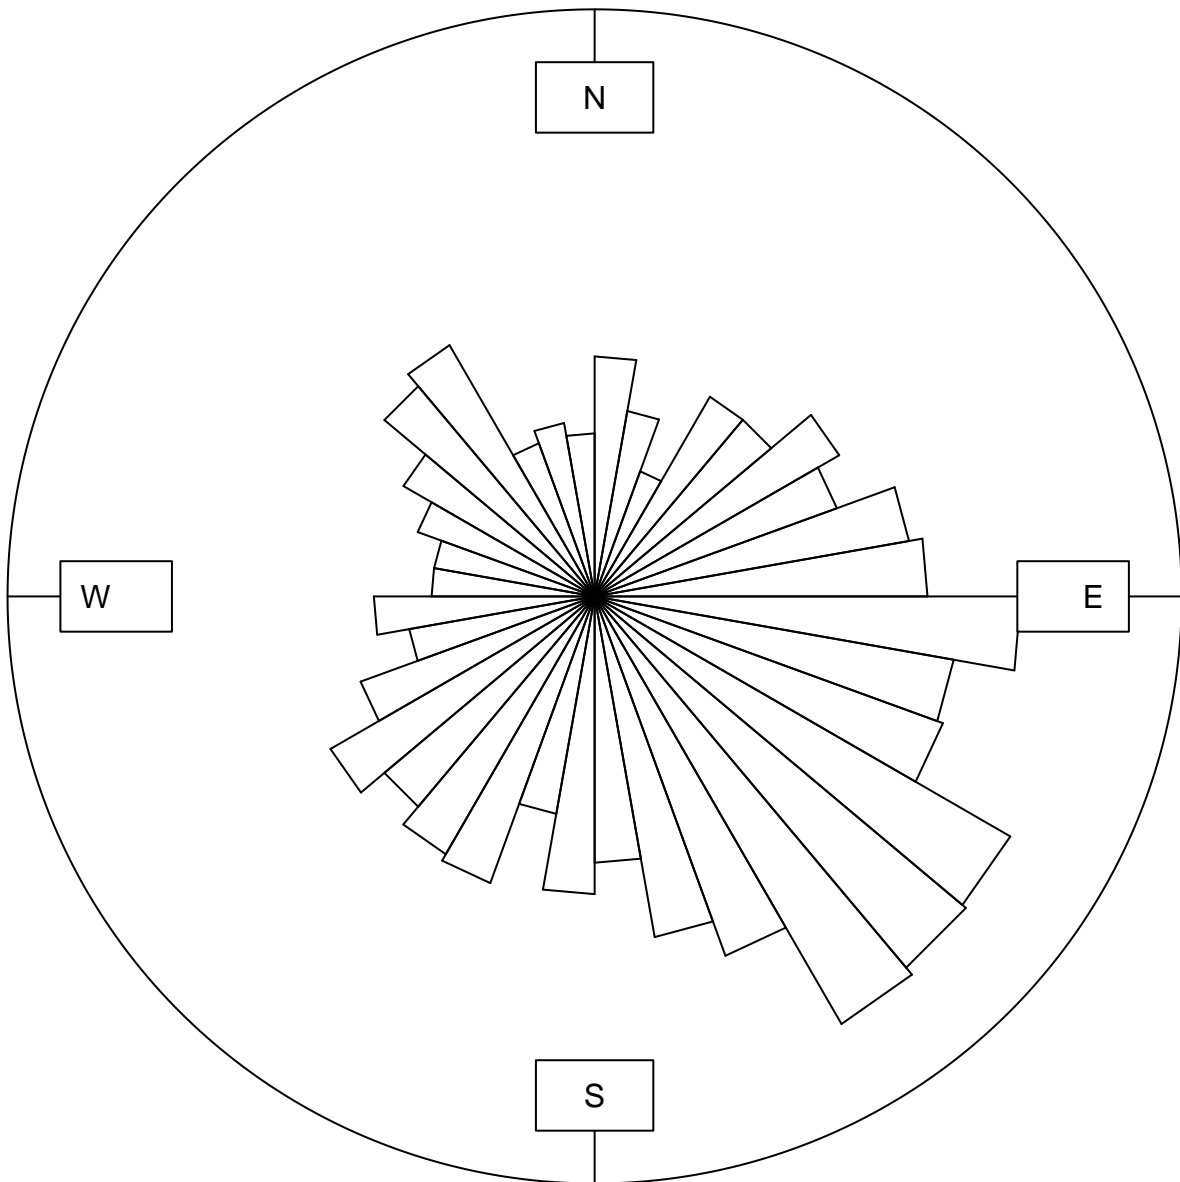

# bootstrap 960

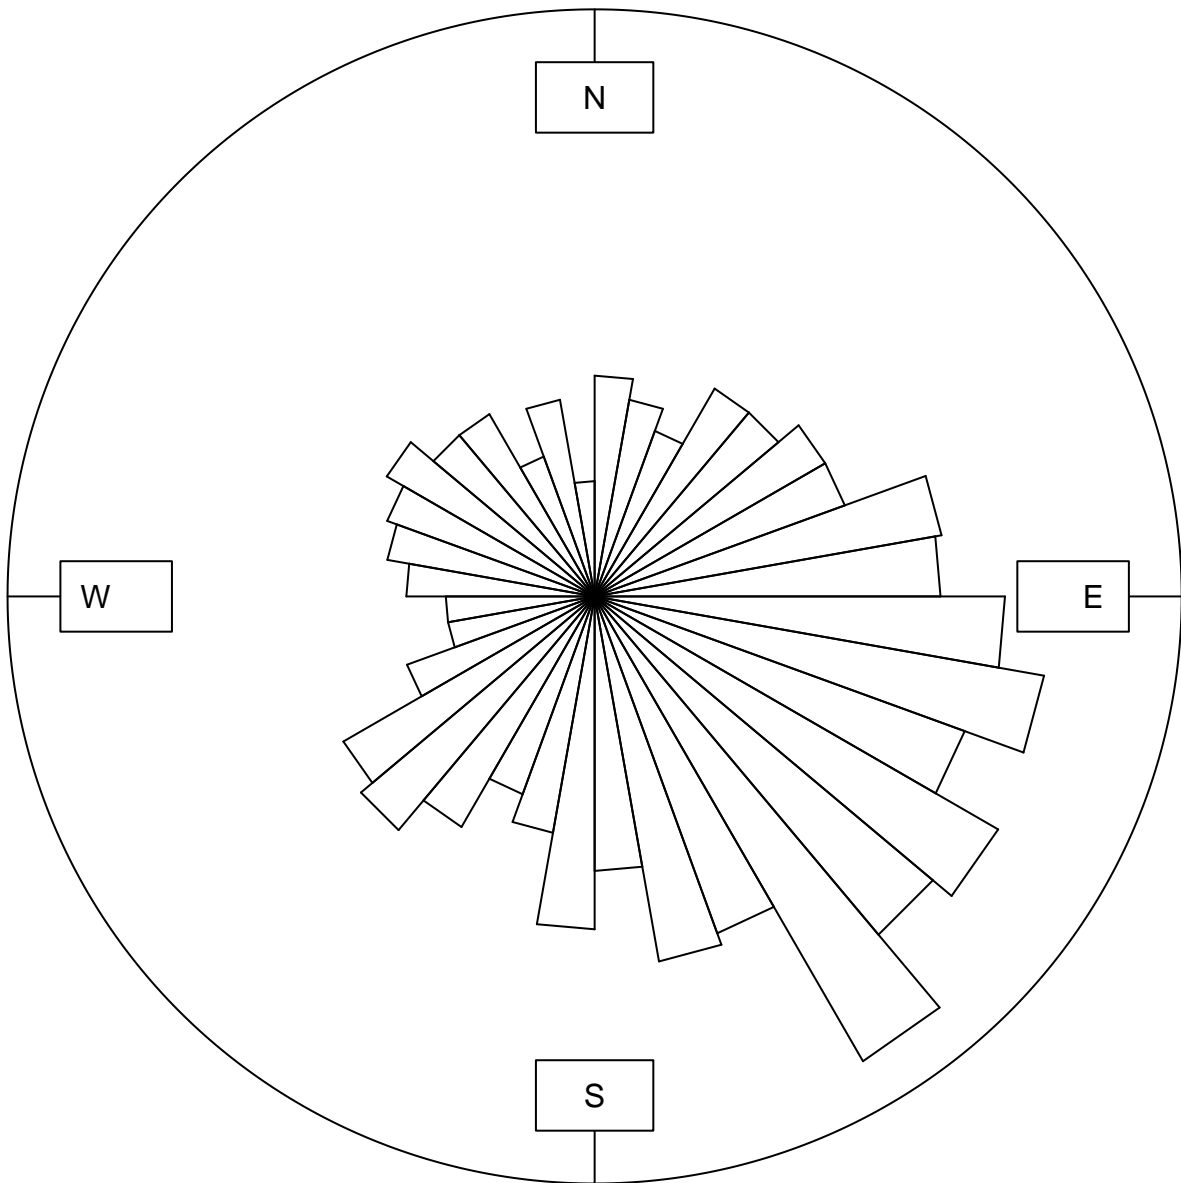



# bootstrap 961

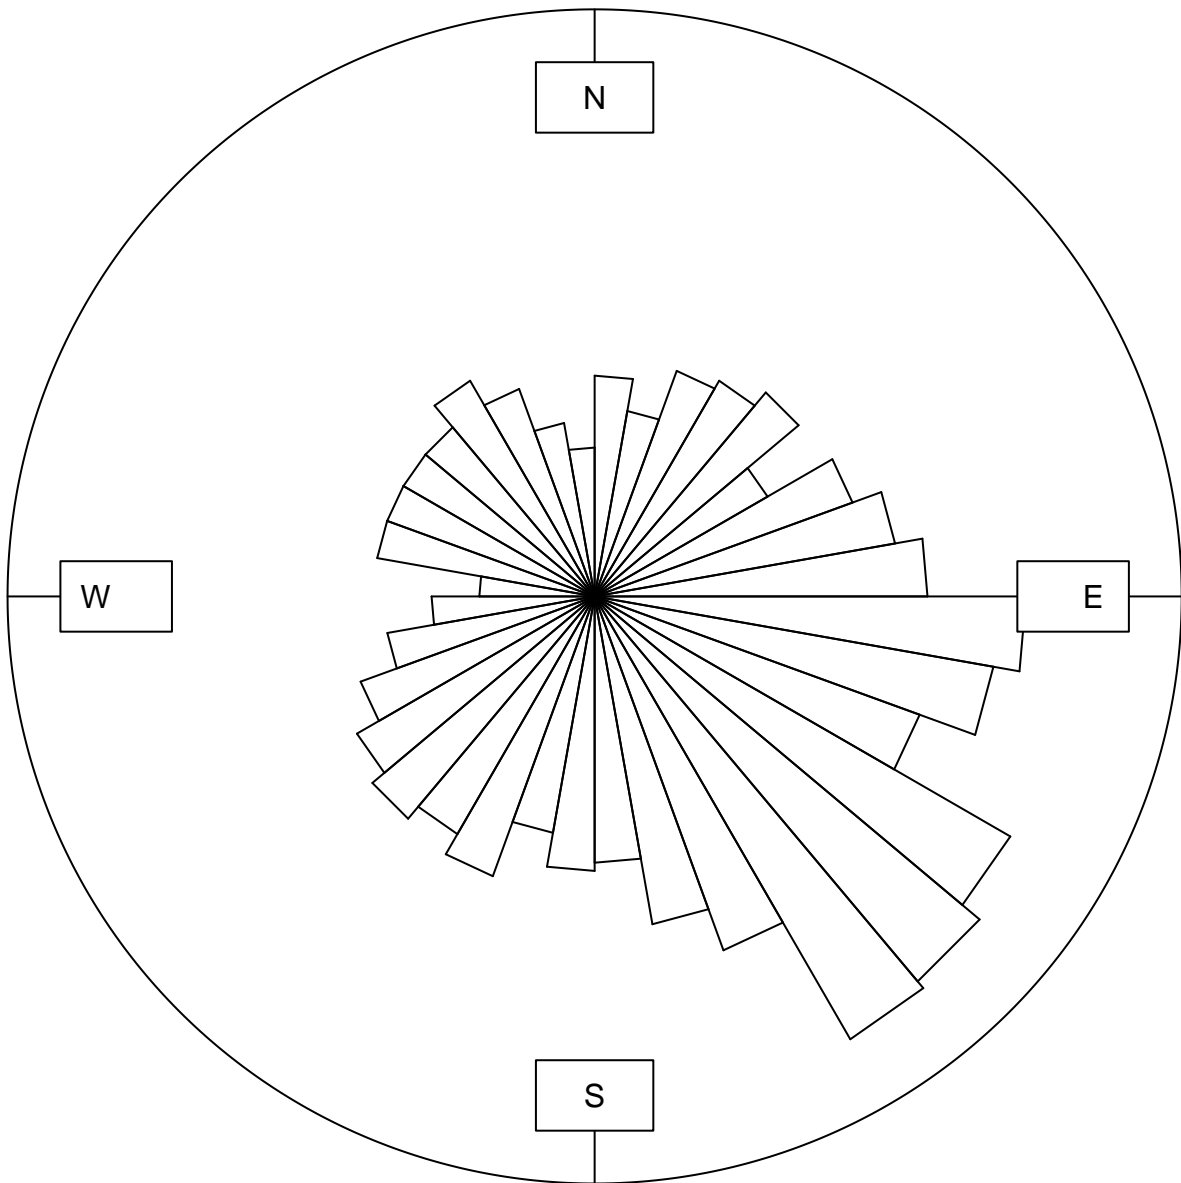

# bootstrap 962

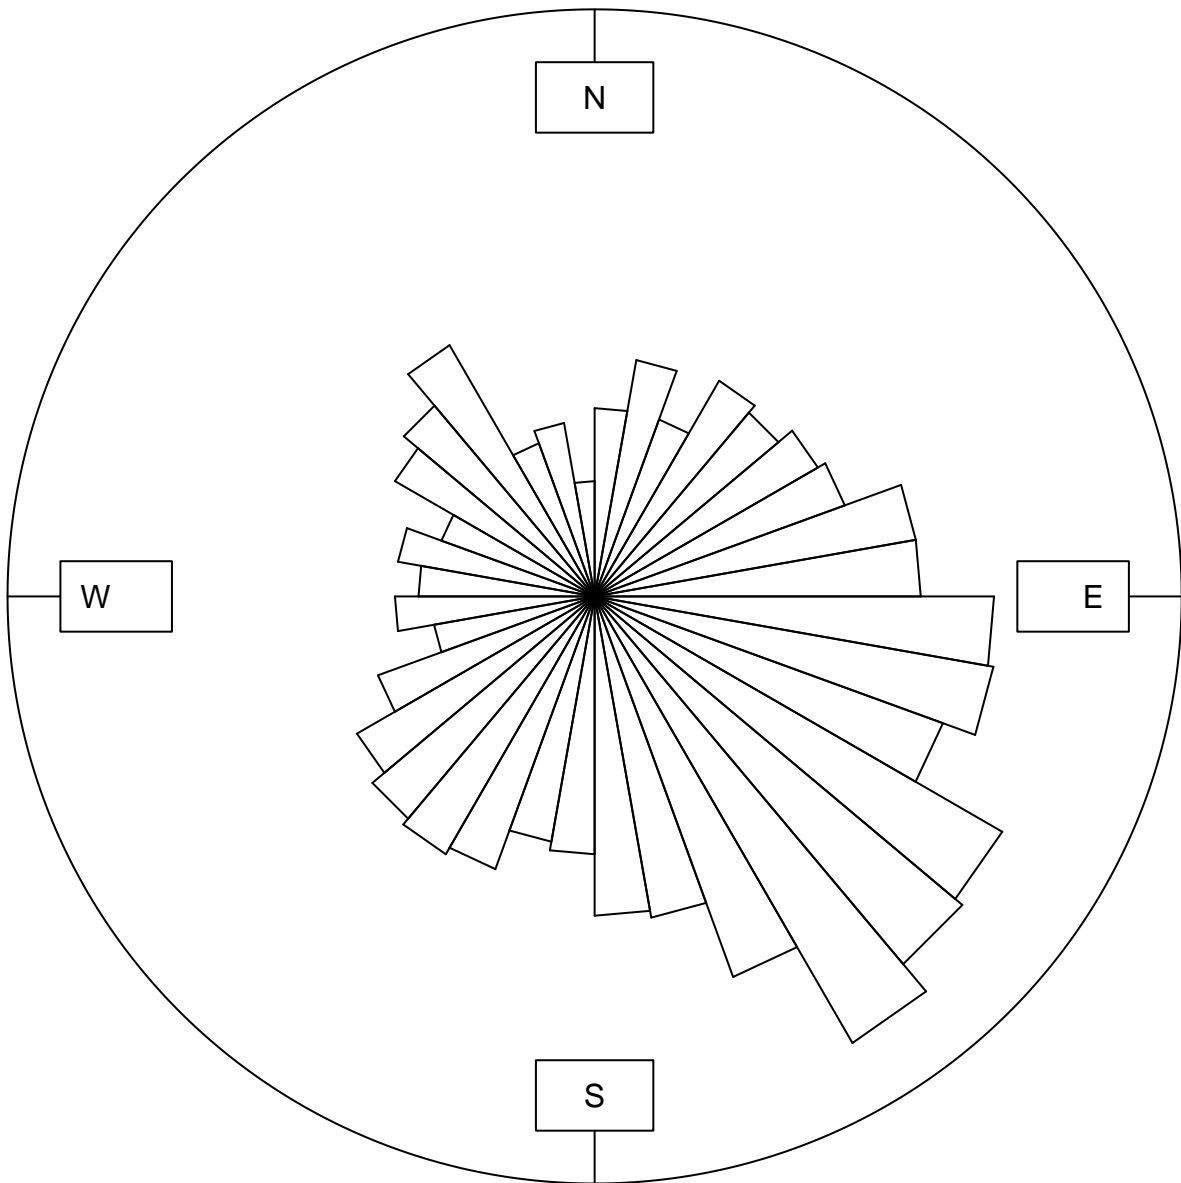

# bootstrap 963

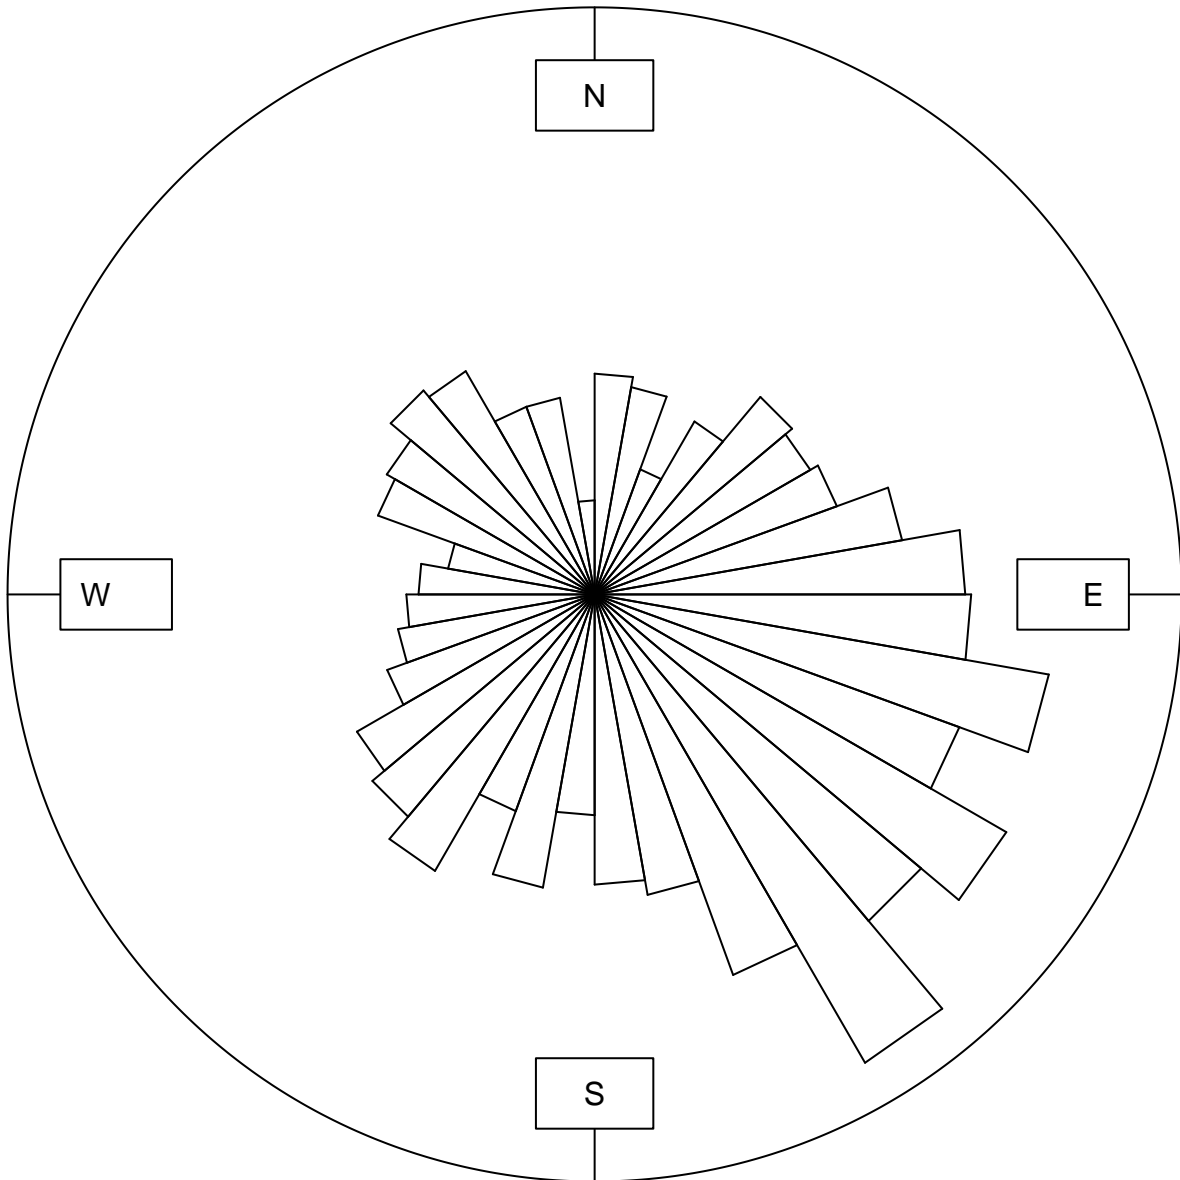

# bootstrap 964

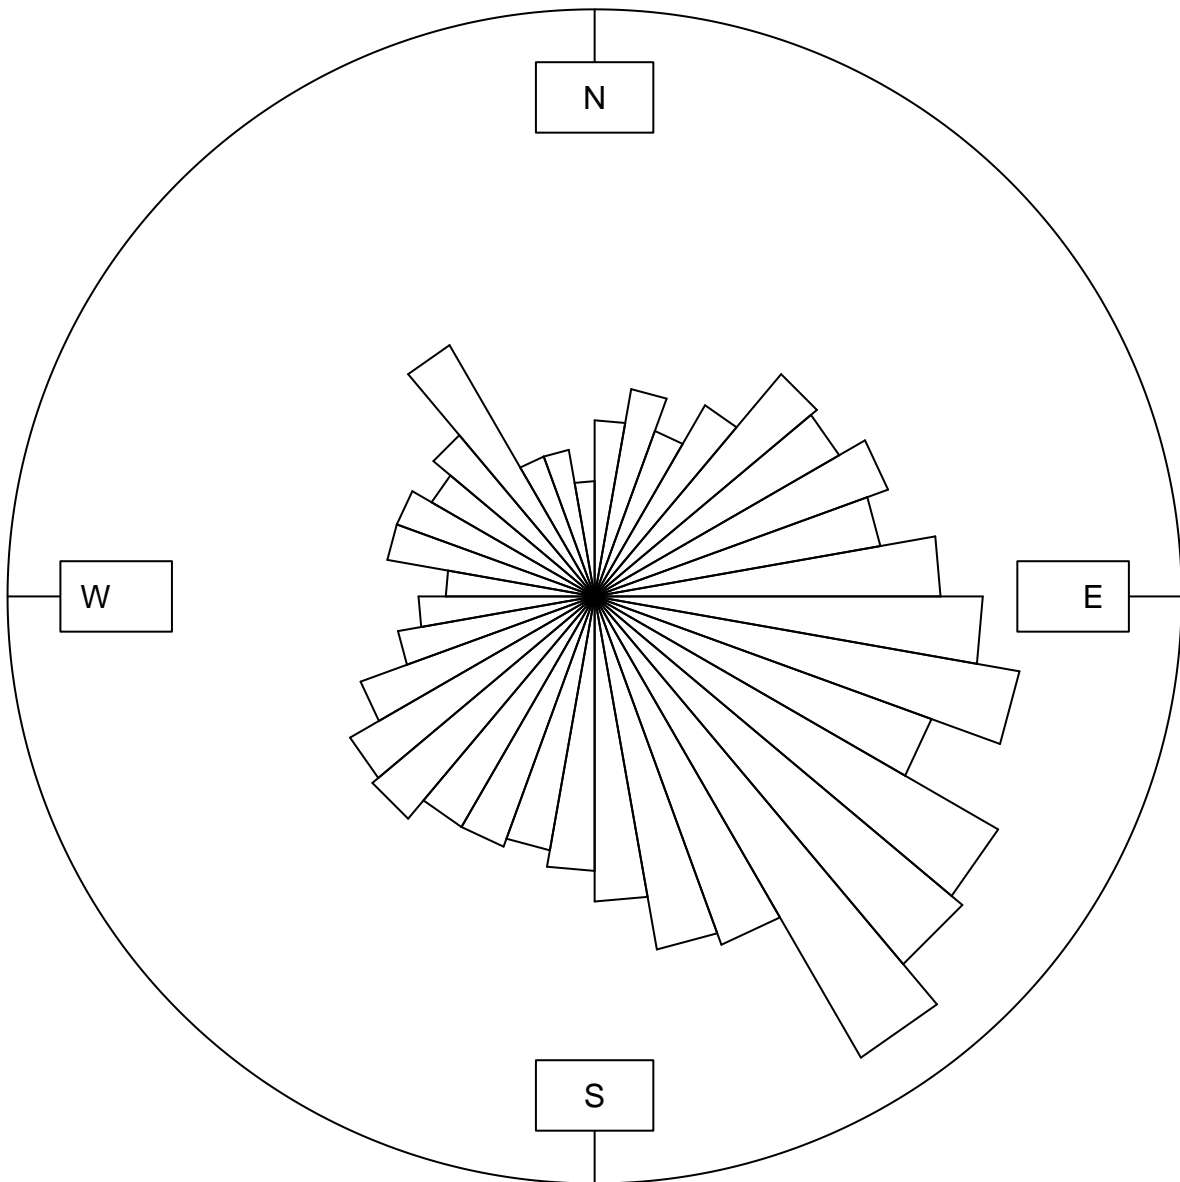

# bootstrap 965

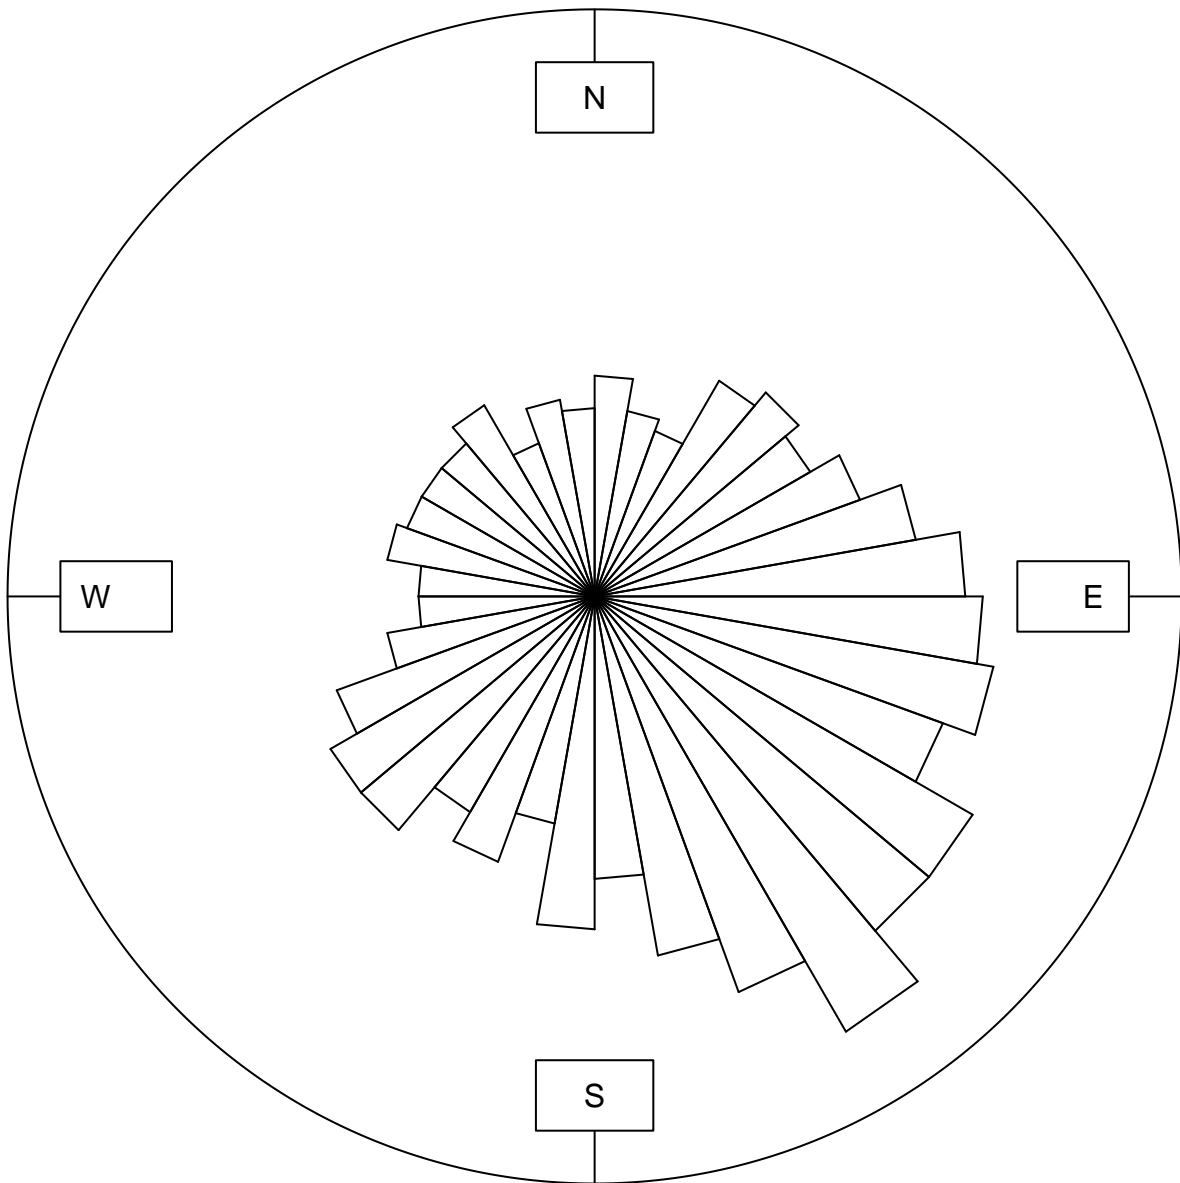

# bootstrap 966

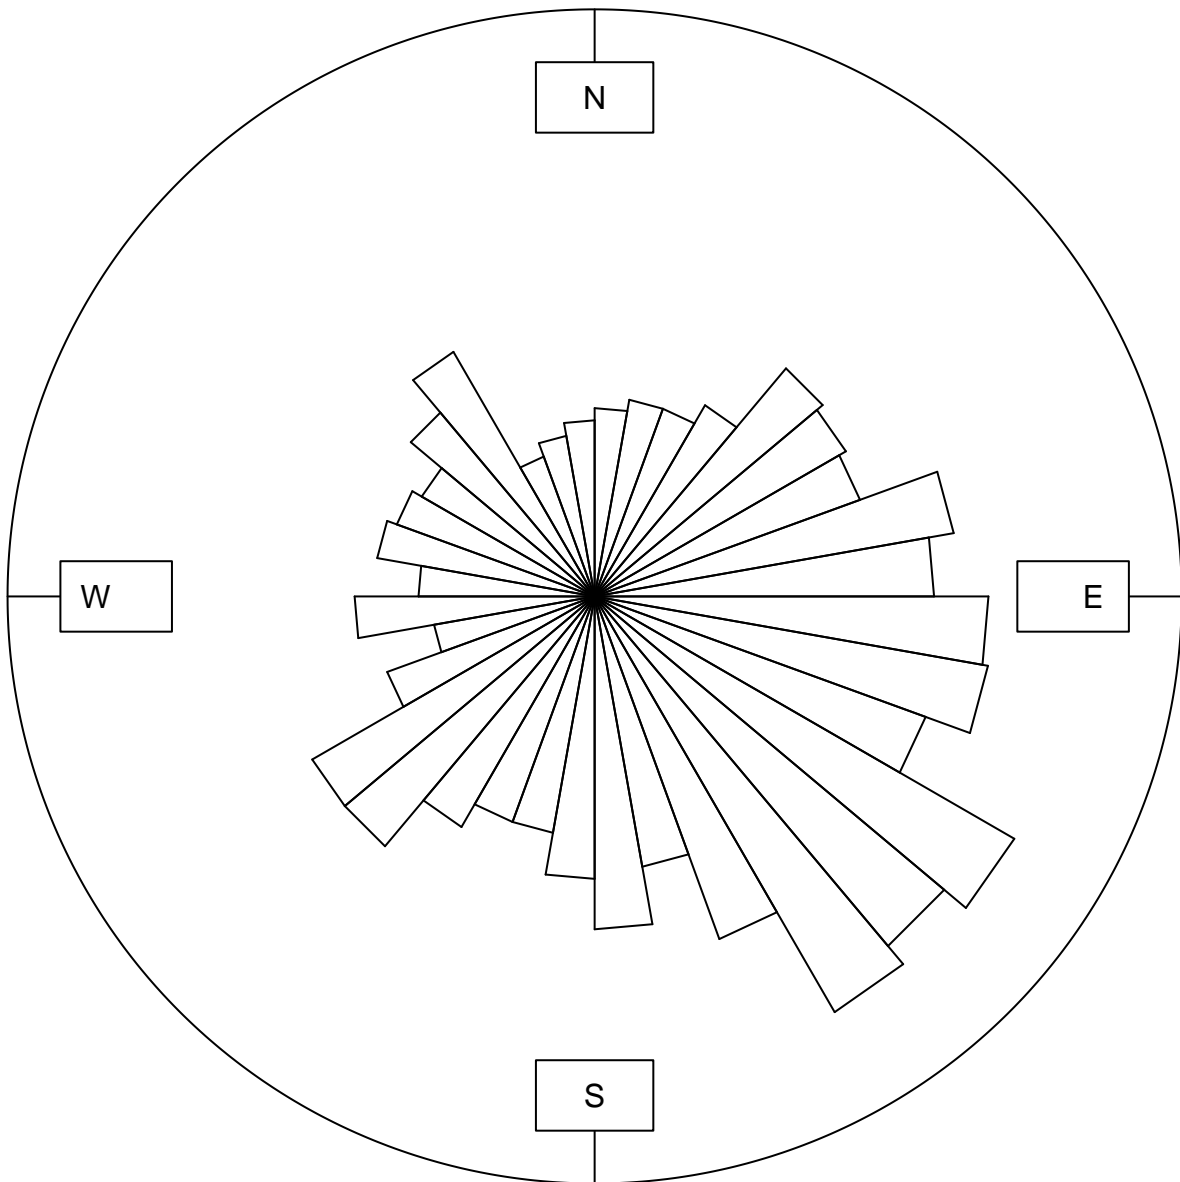

# bootstrap 967

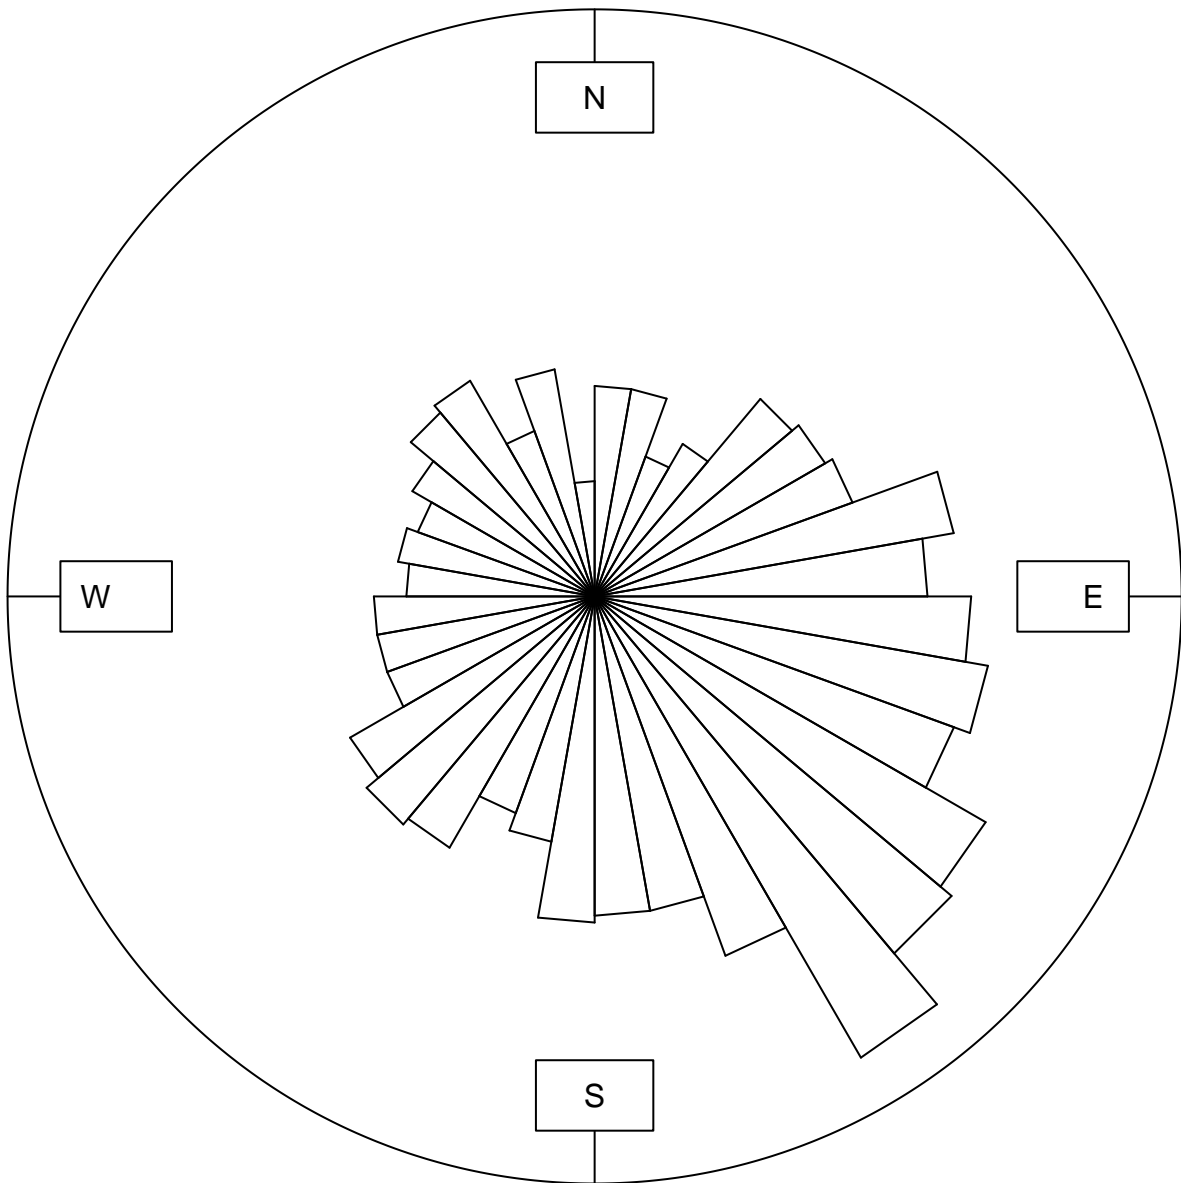

# bootstrap 968

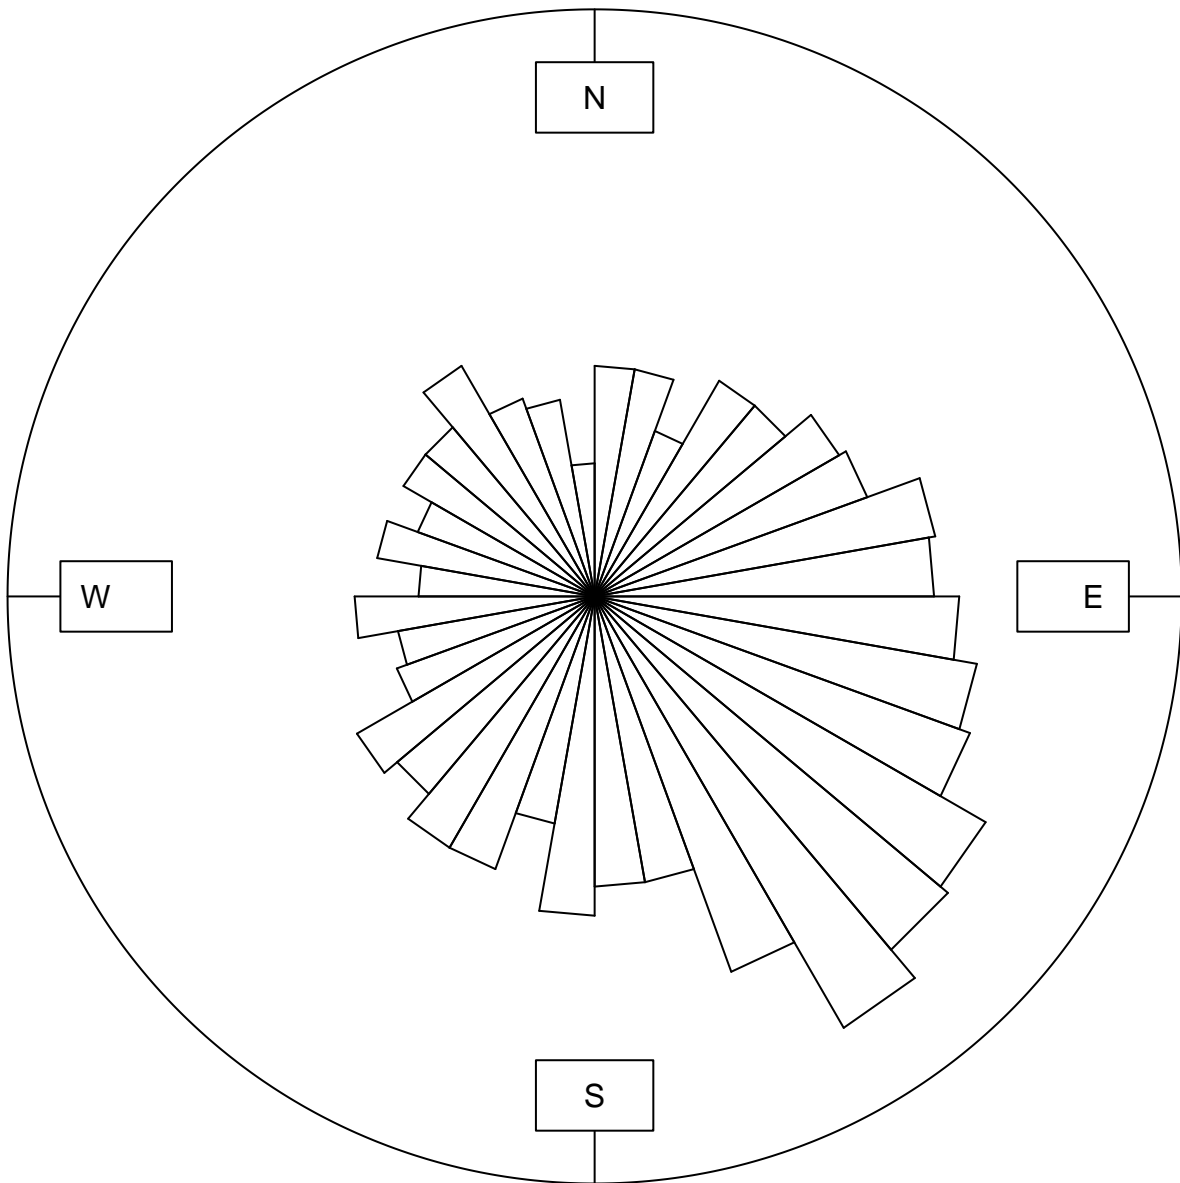



# bootstrap 969

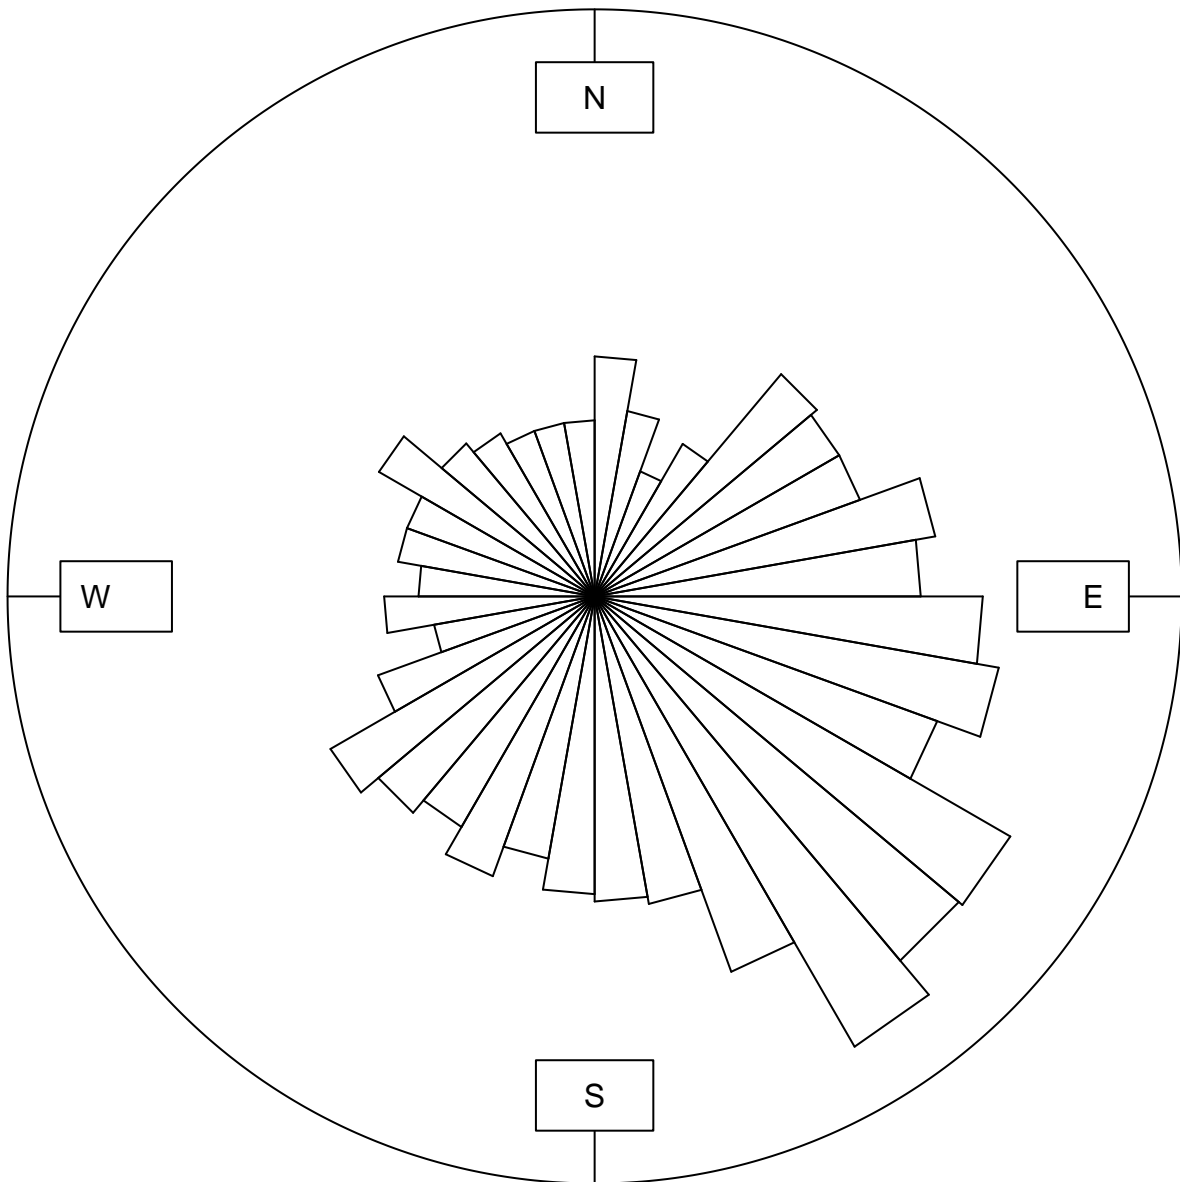

# bootstrap 970

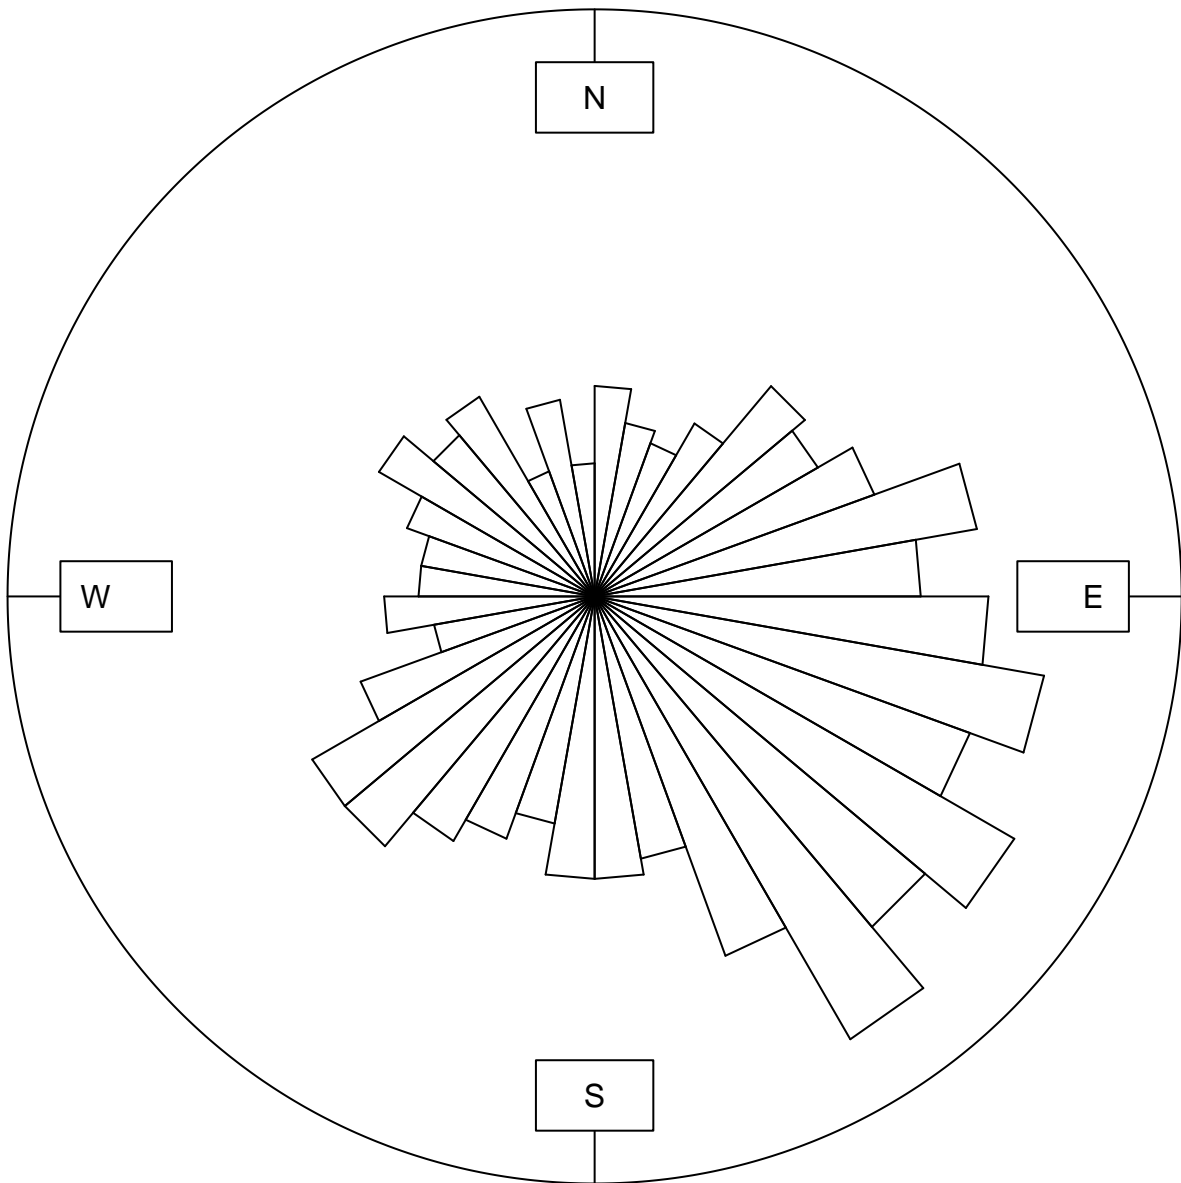

# bootstrap 971

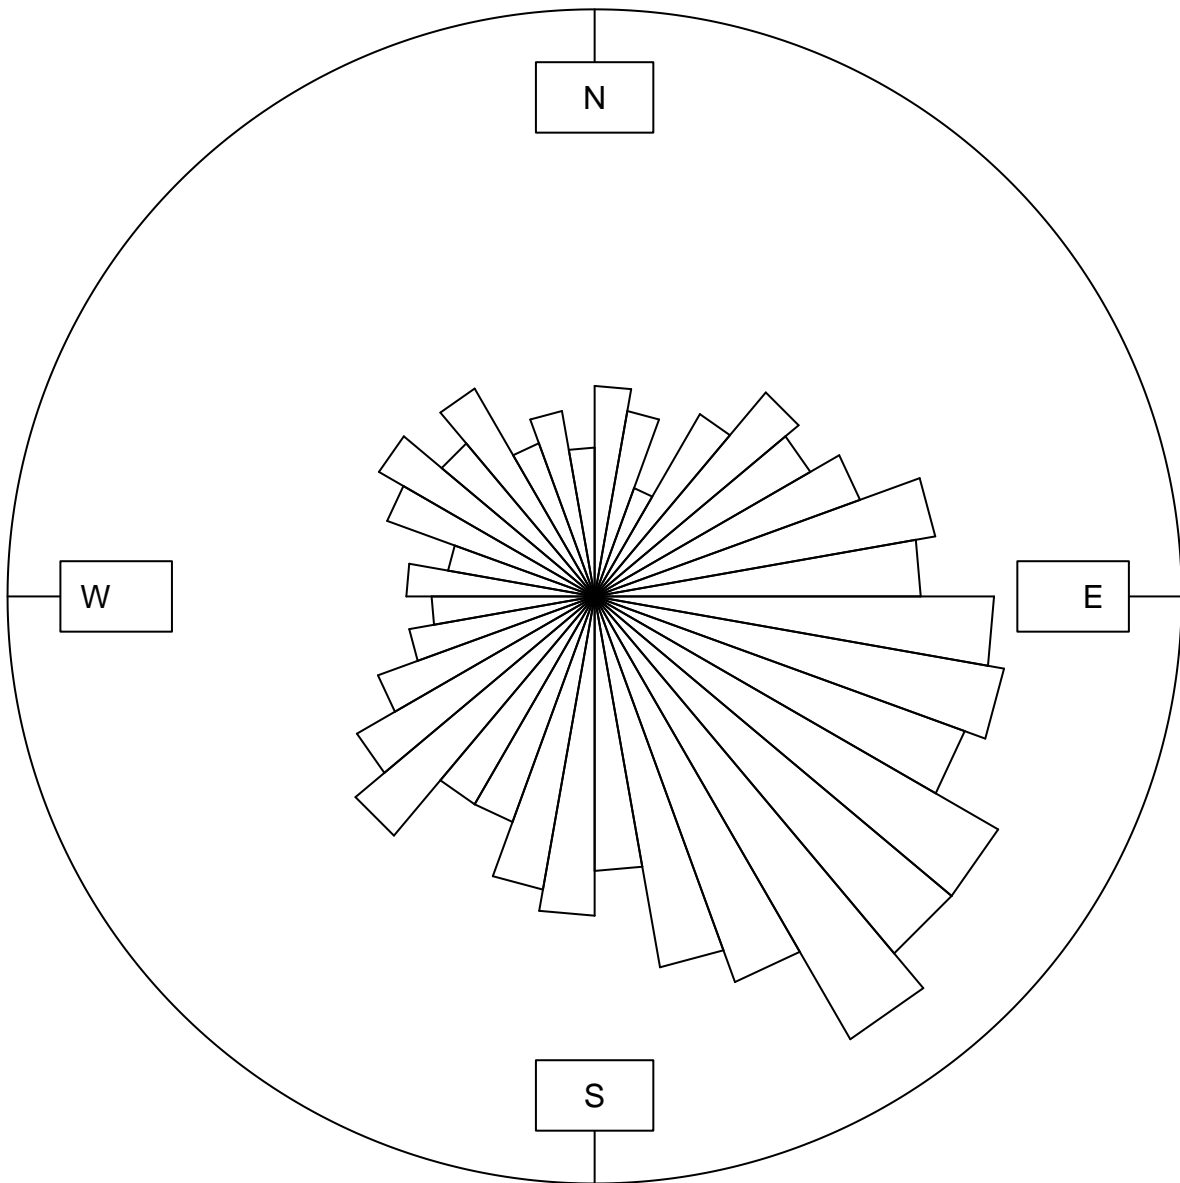

# bootstrap 972

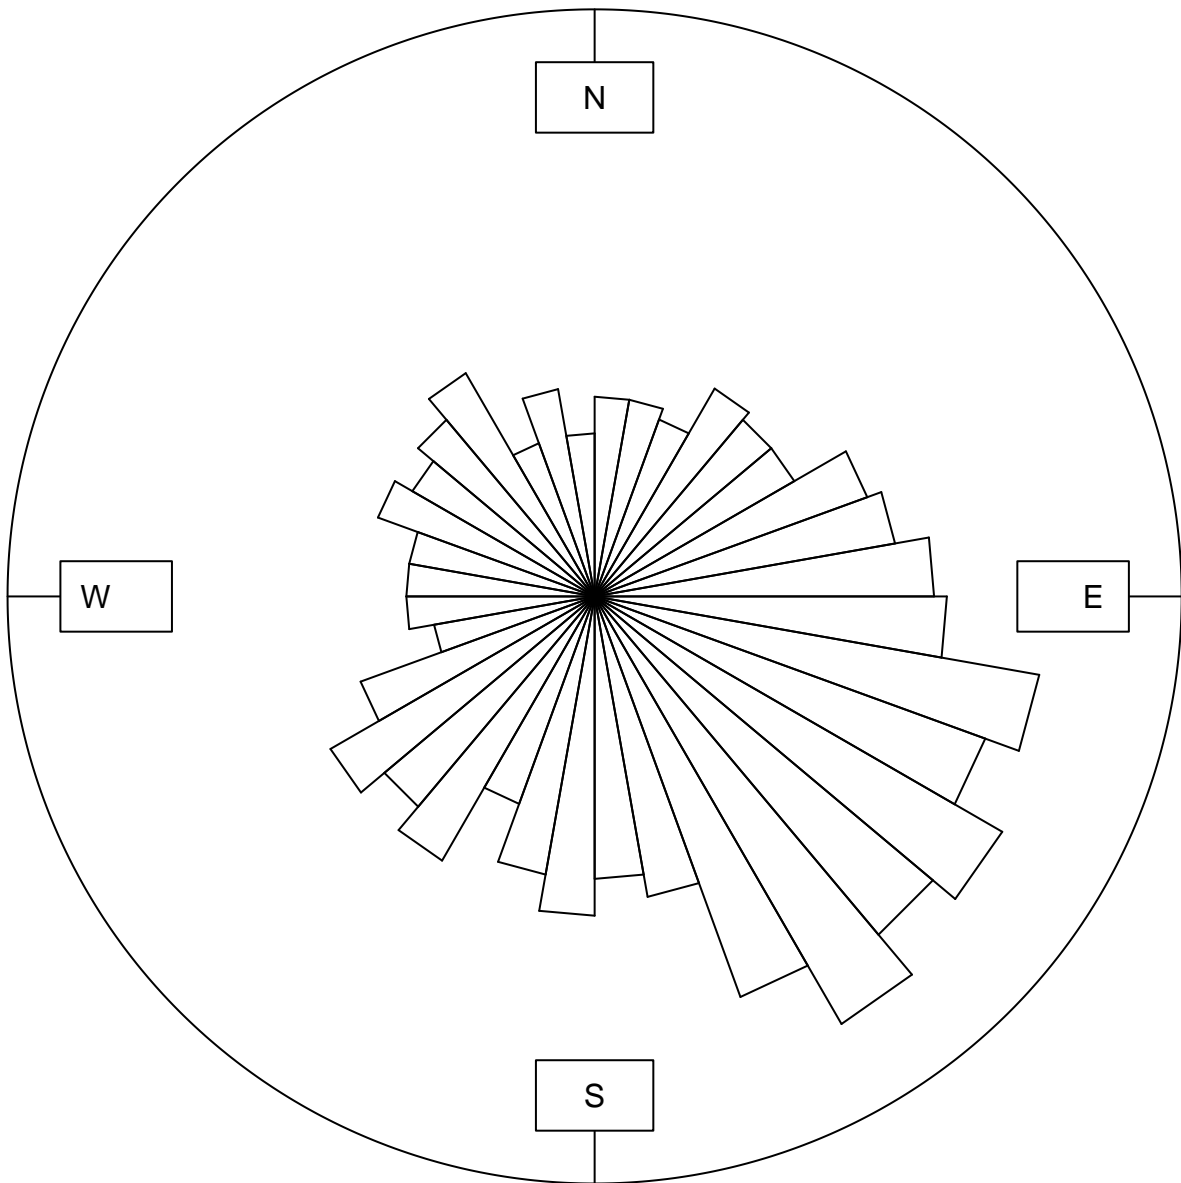

# bootstrap 973

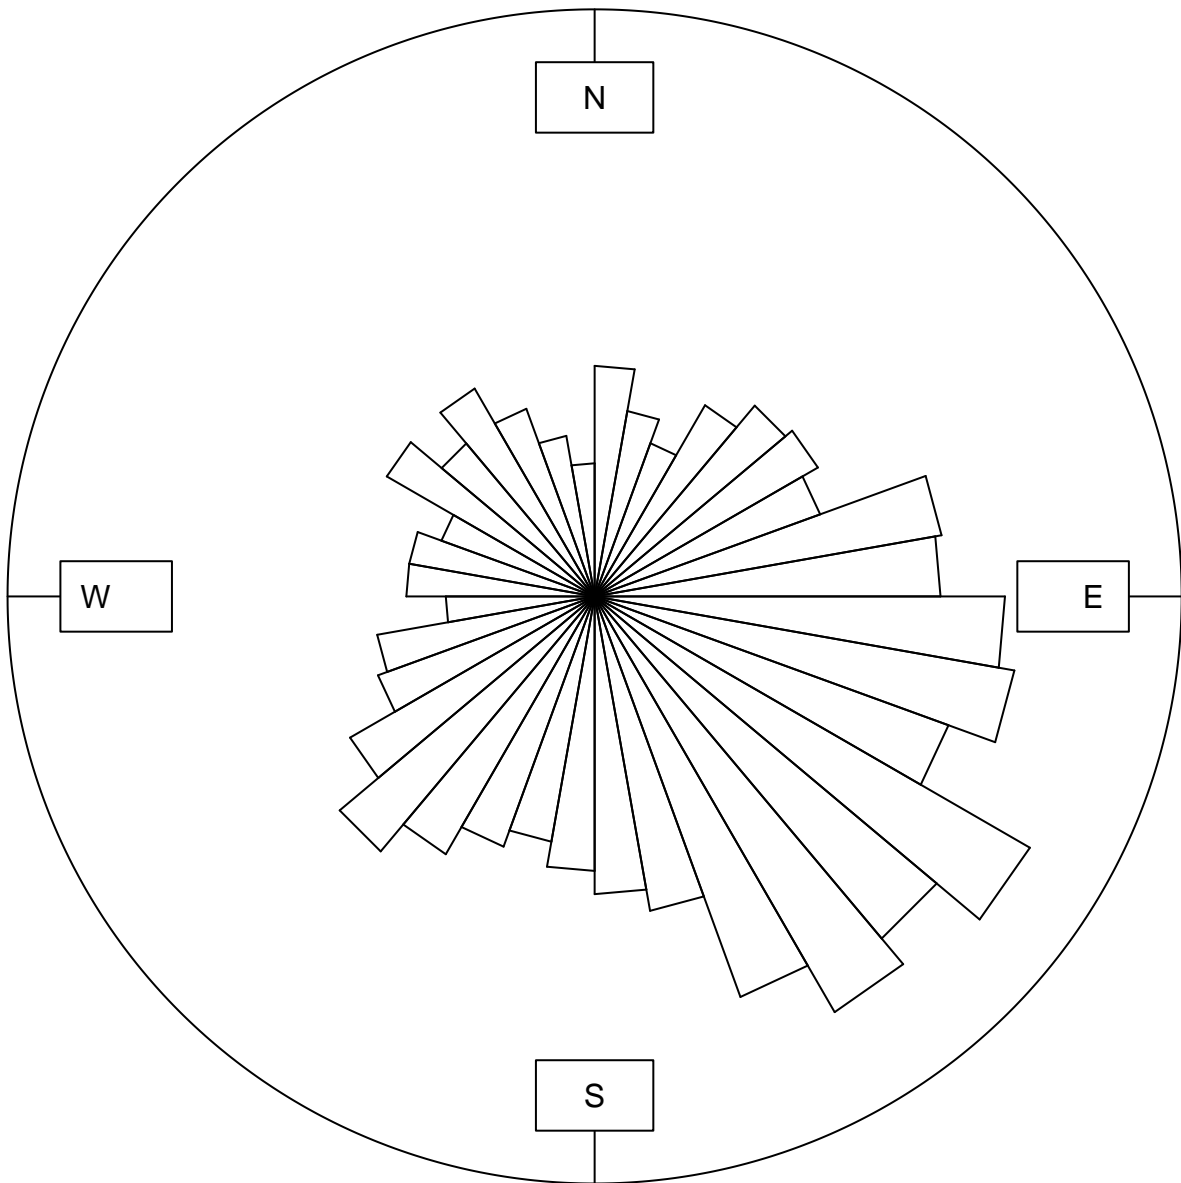

**bootstrap 974**

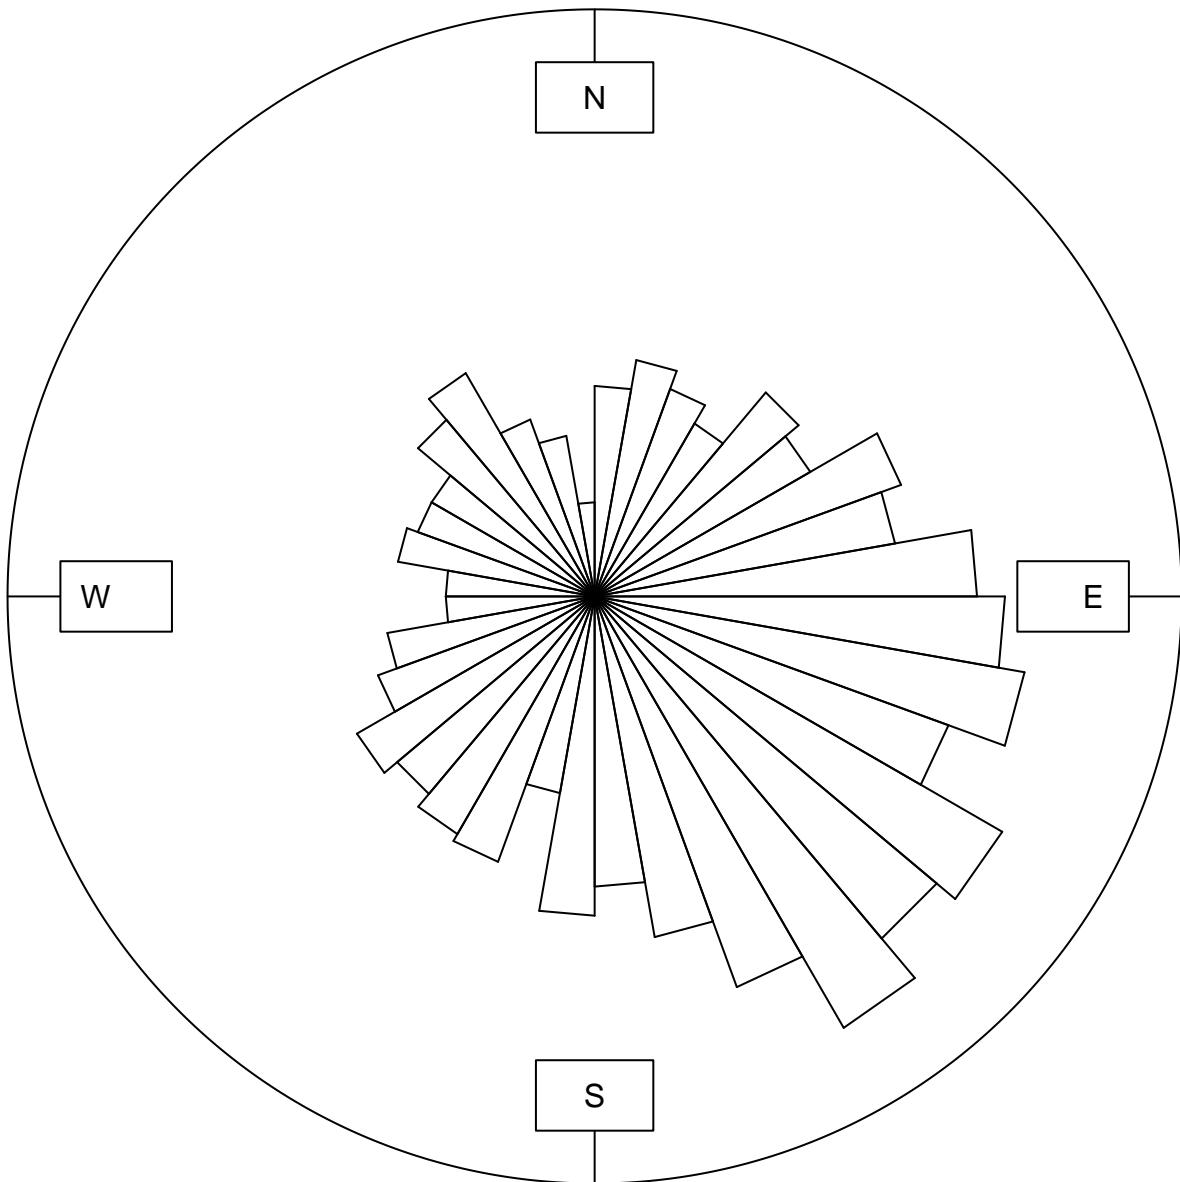

# bootstrap 975

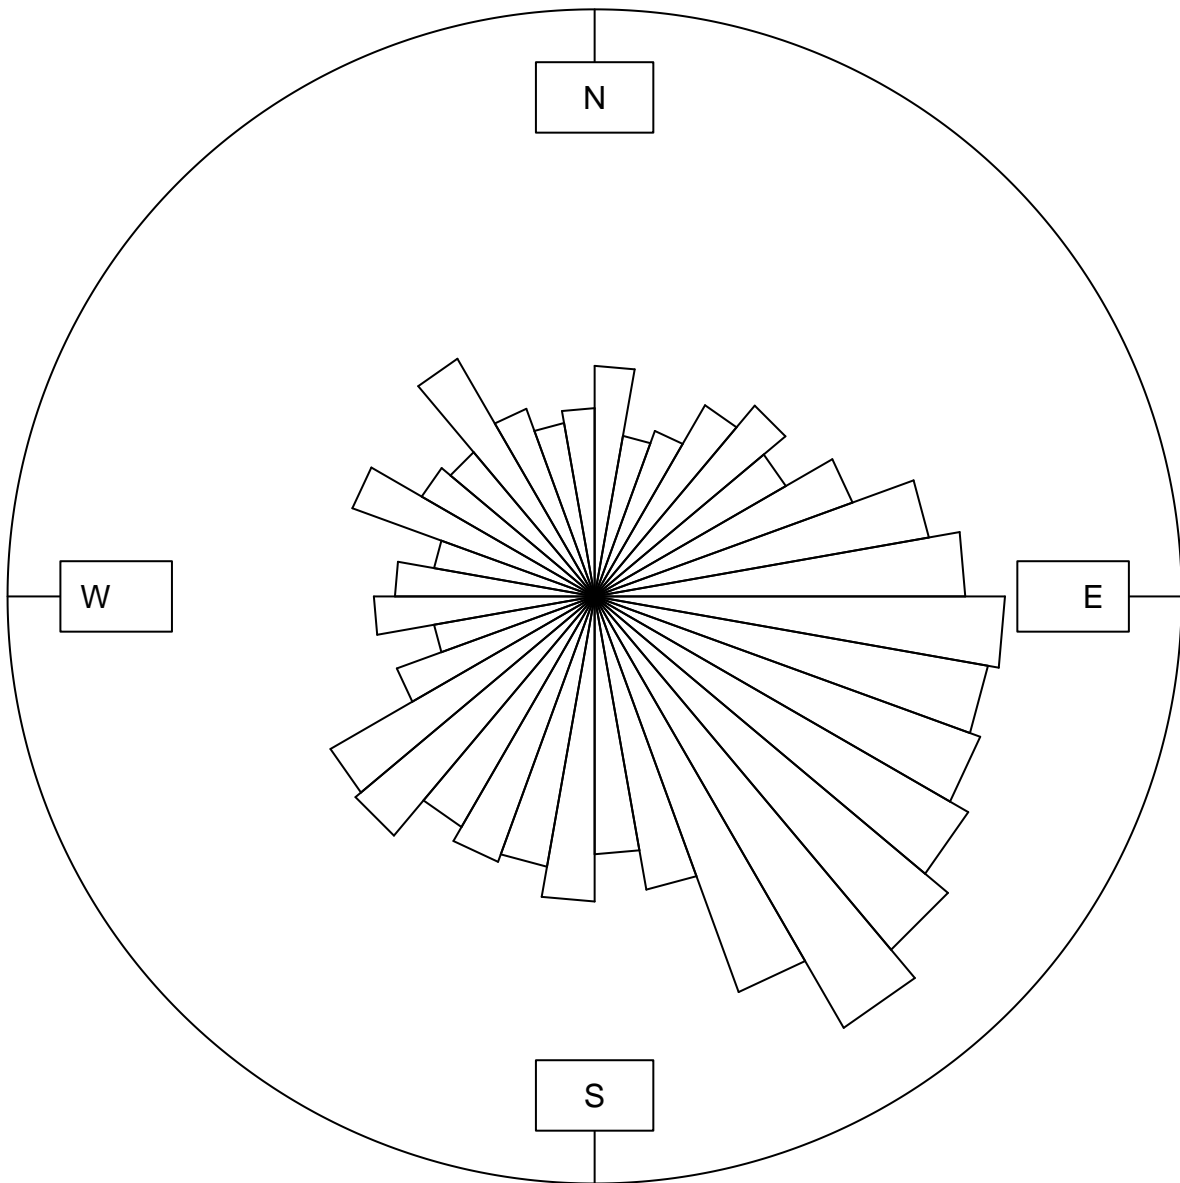

# bootstrap 976

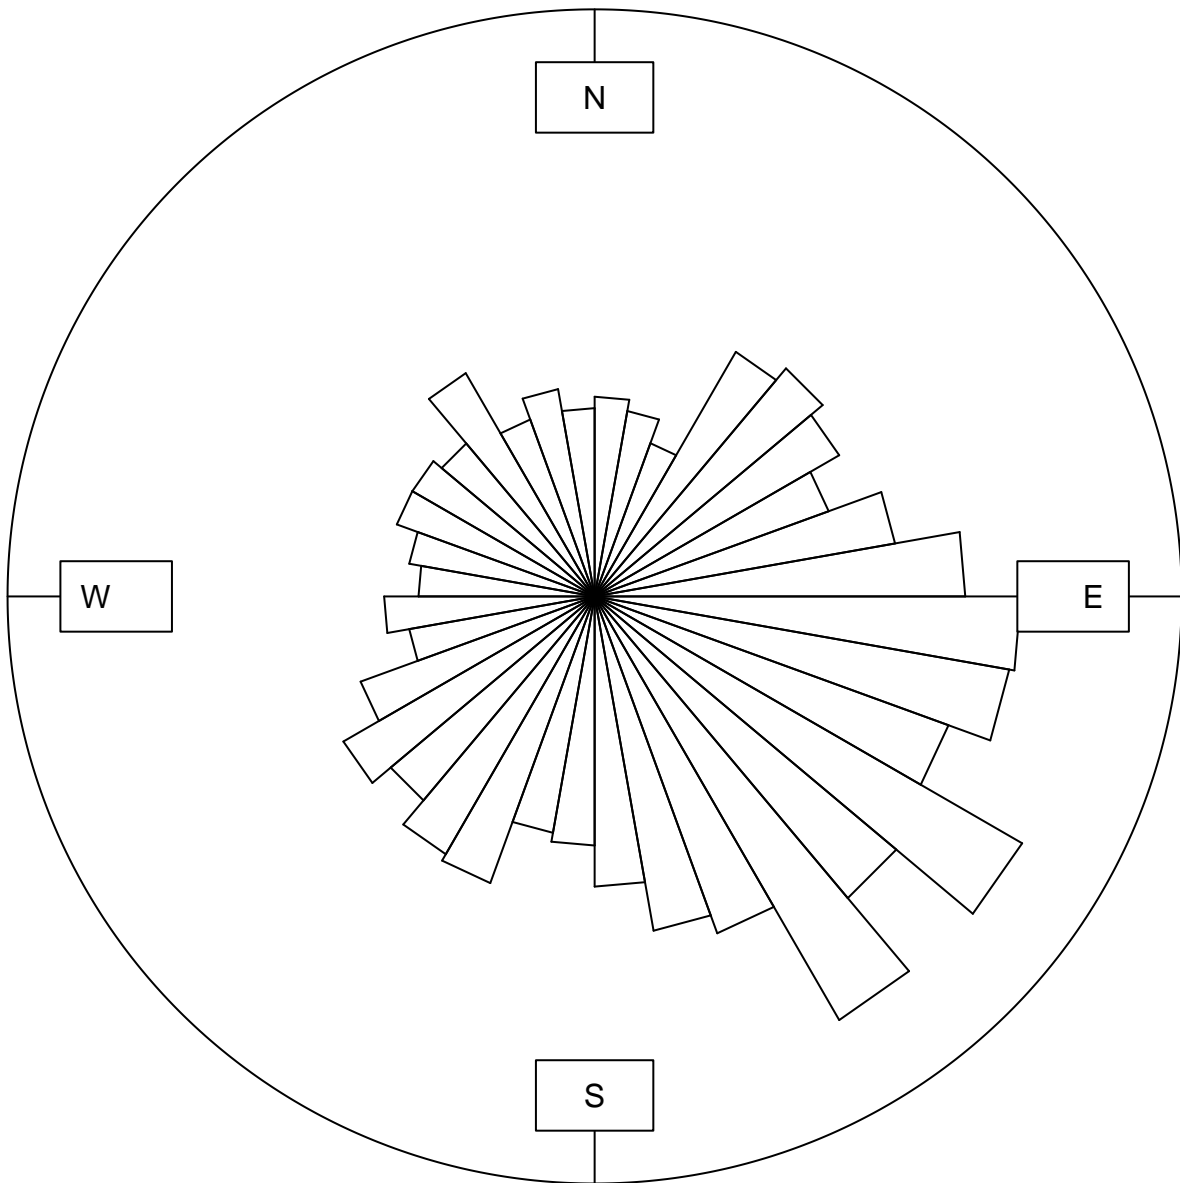



# bootstrap 977

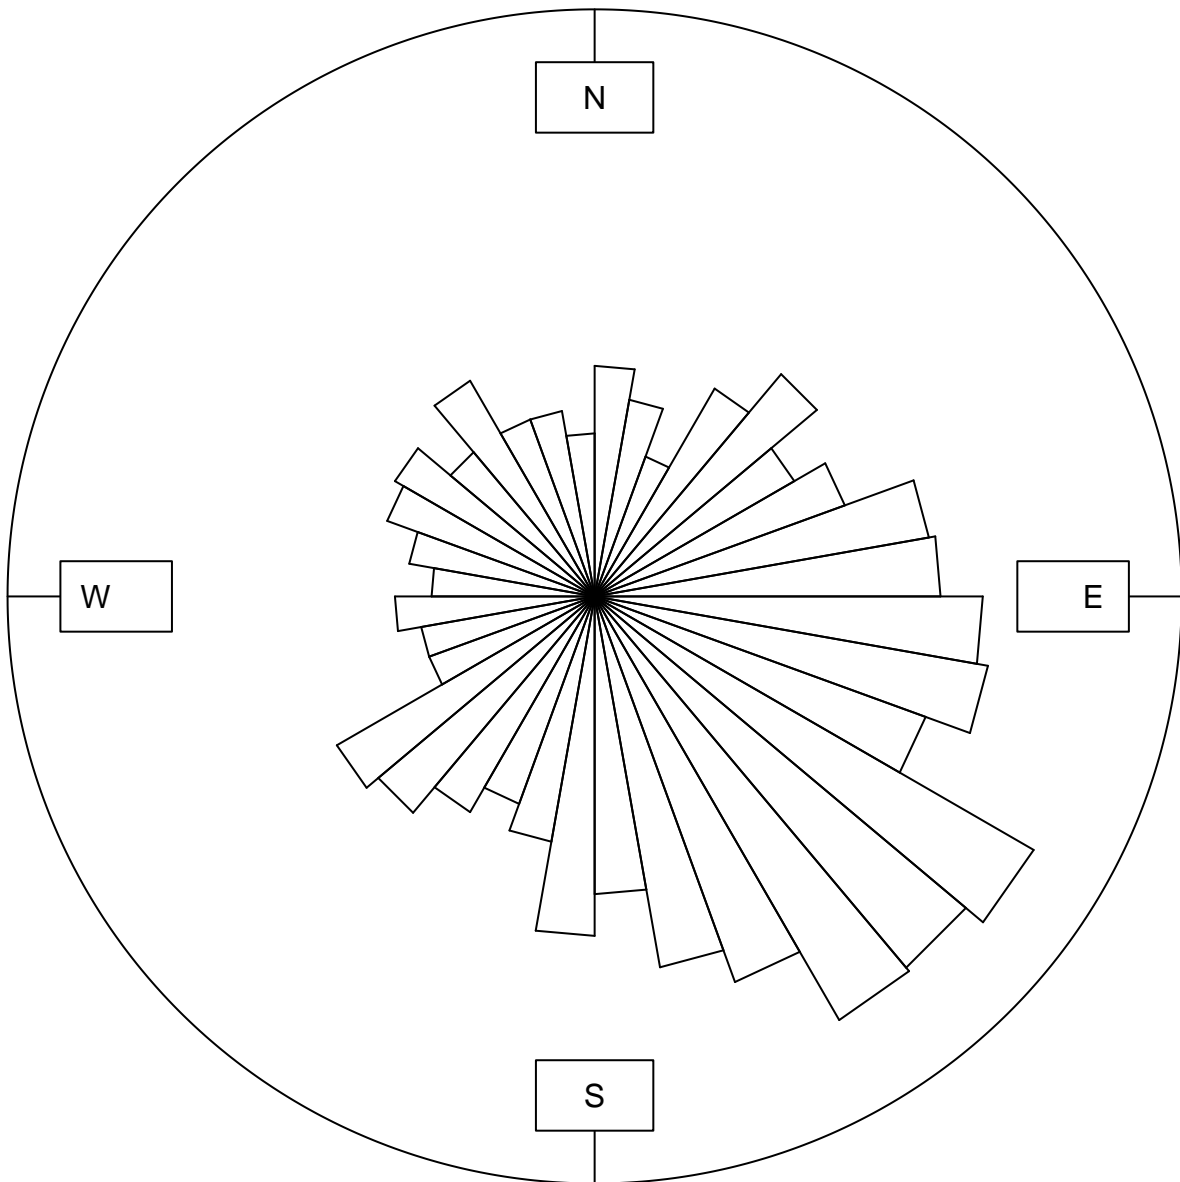

# bootstrap 978

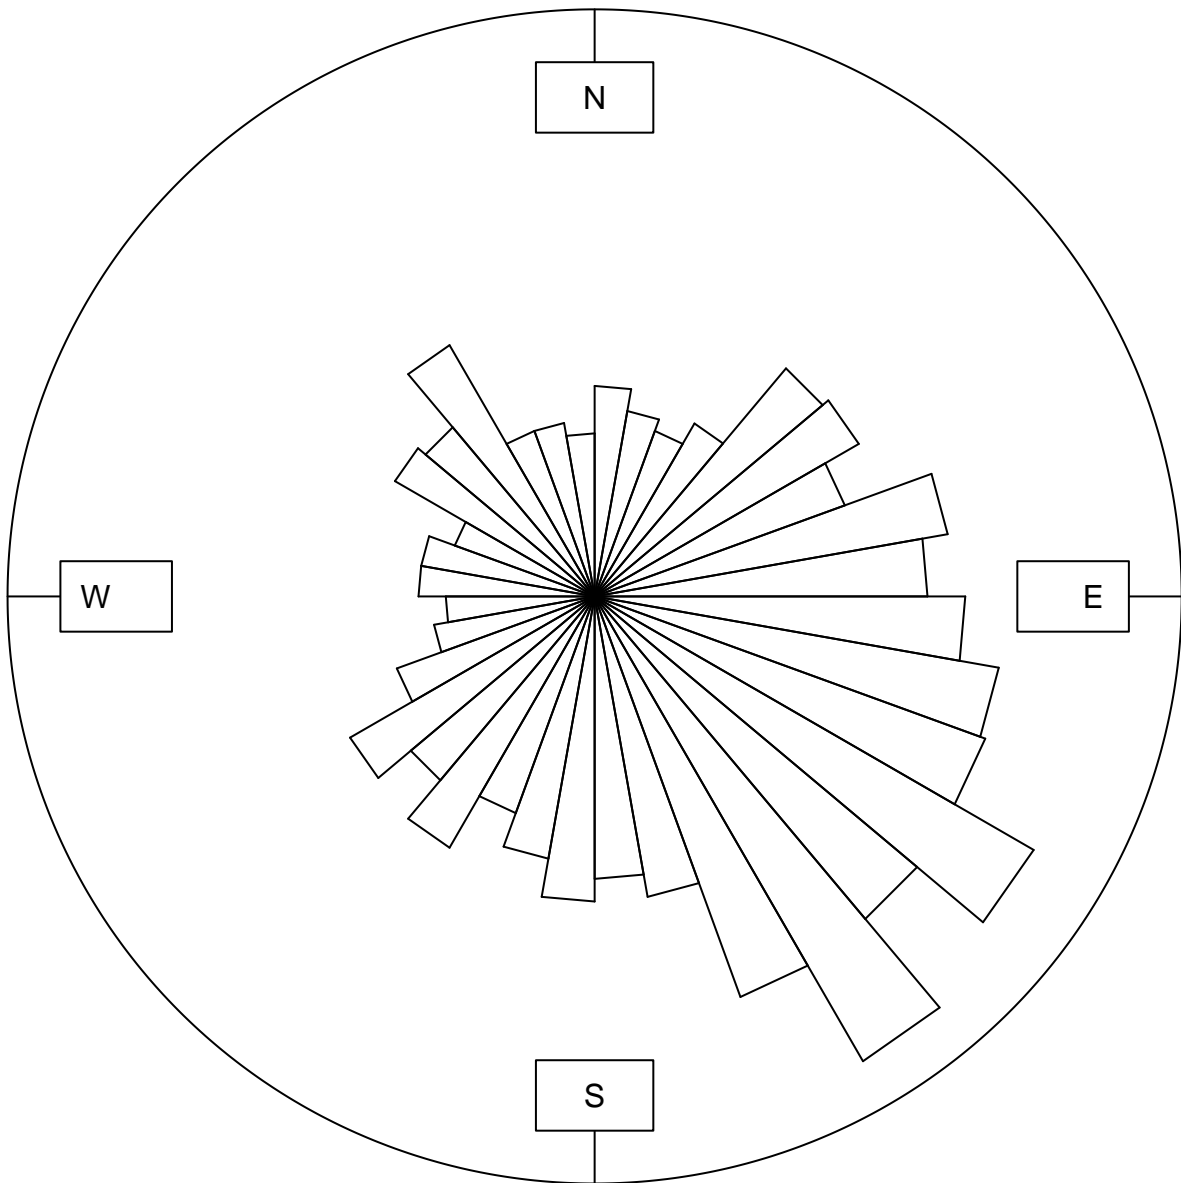

# bootstrap 979

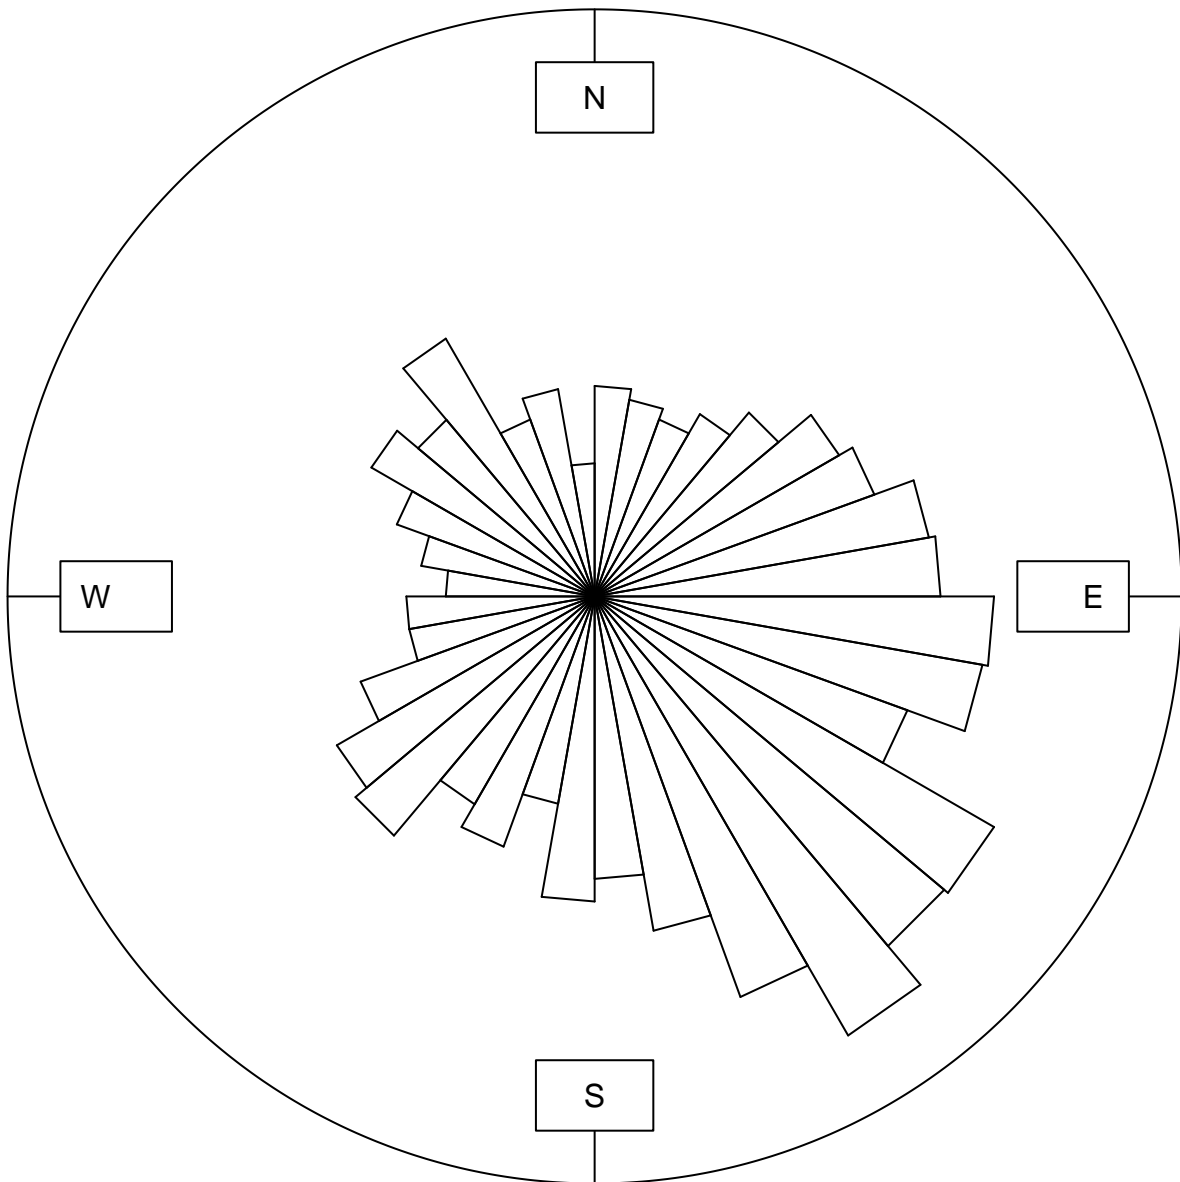

# bootstrap 980

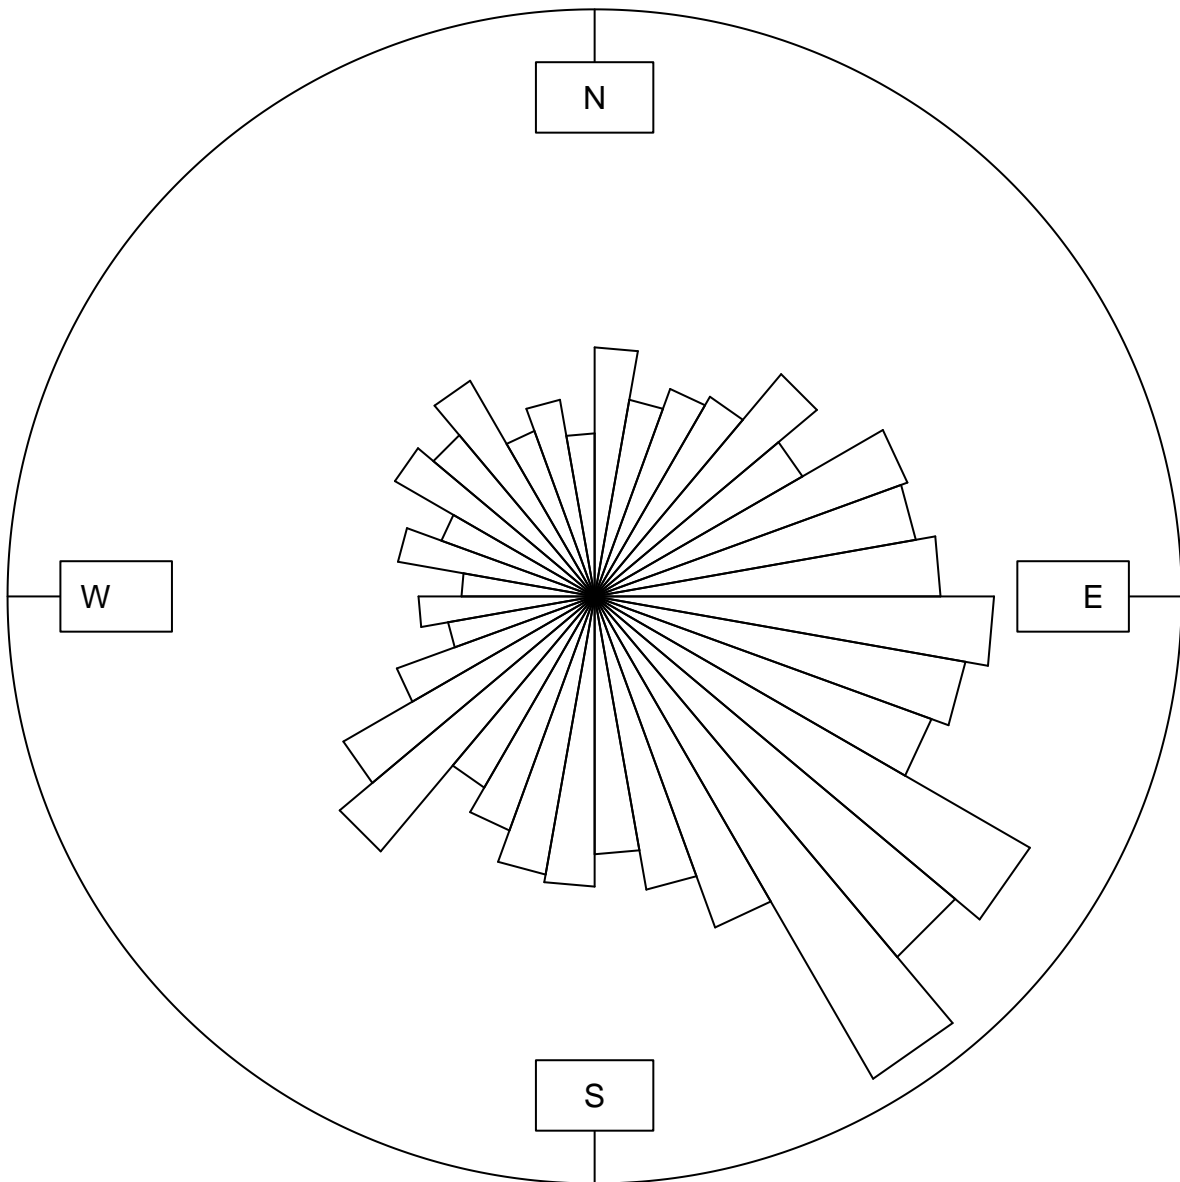

# bootstrap 981

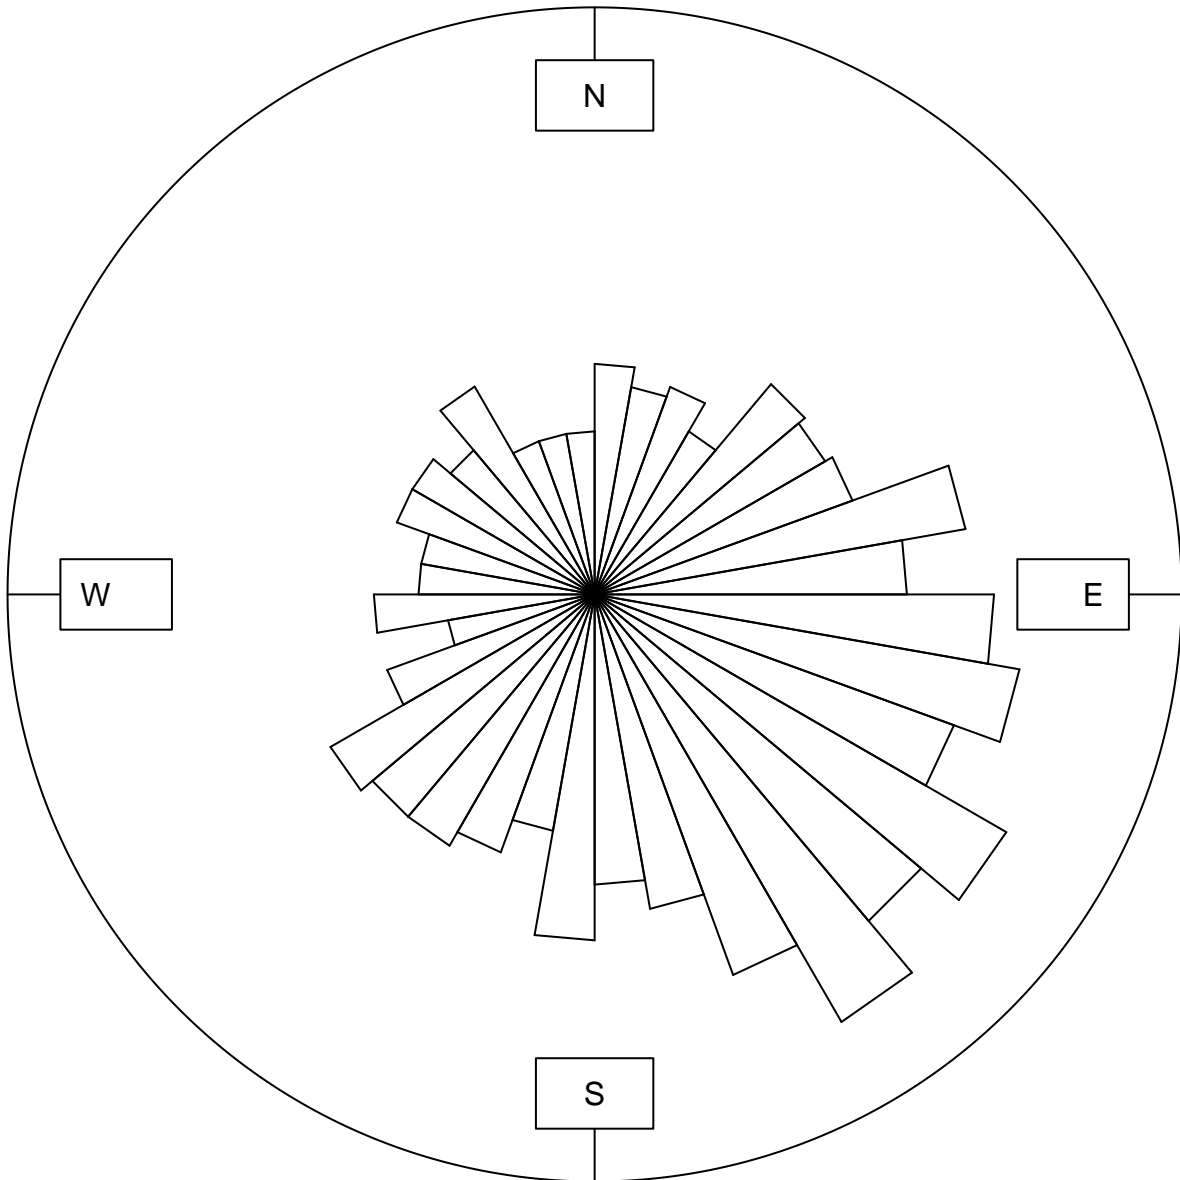

# bootstrap 982

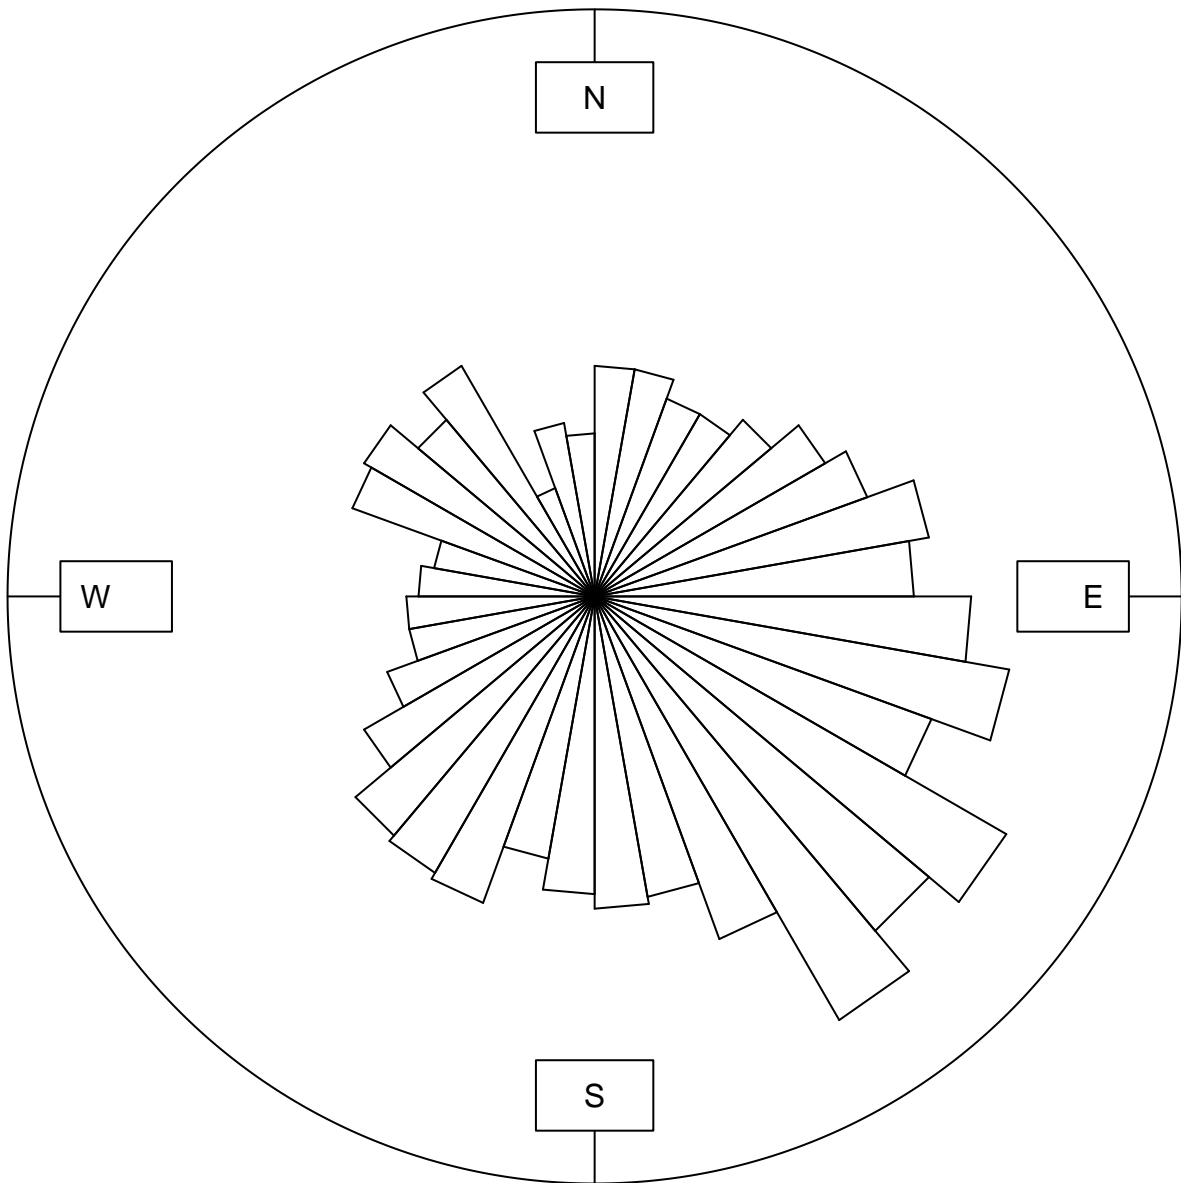

# bootstrap 983

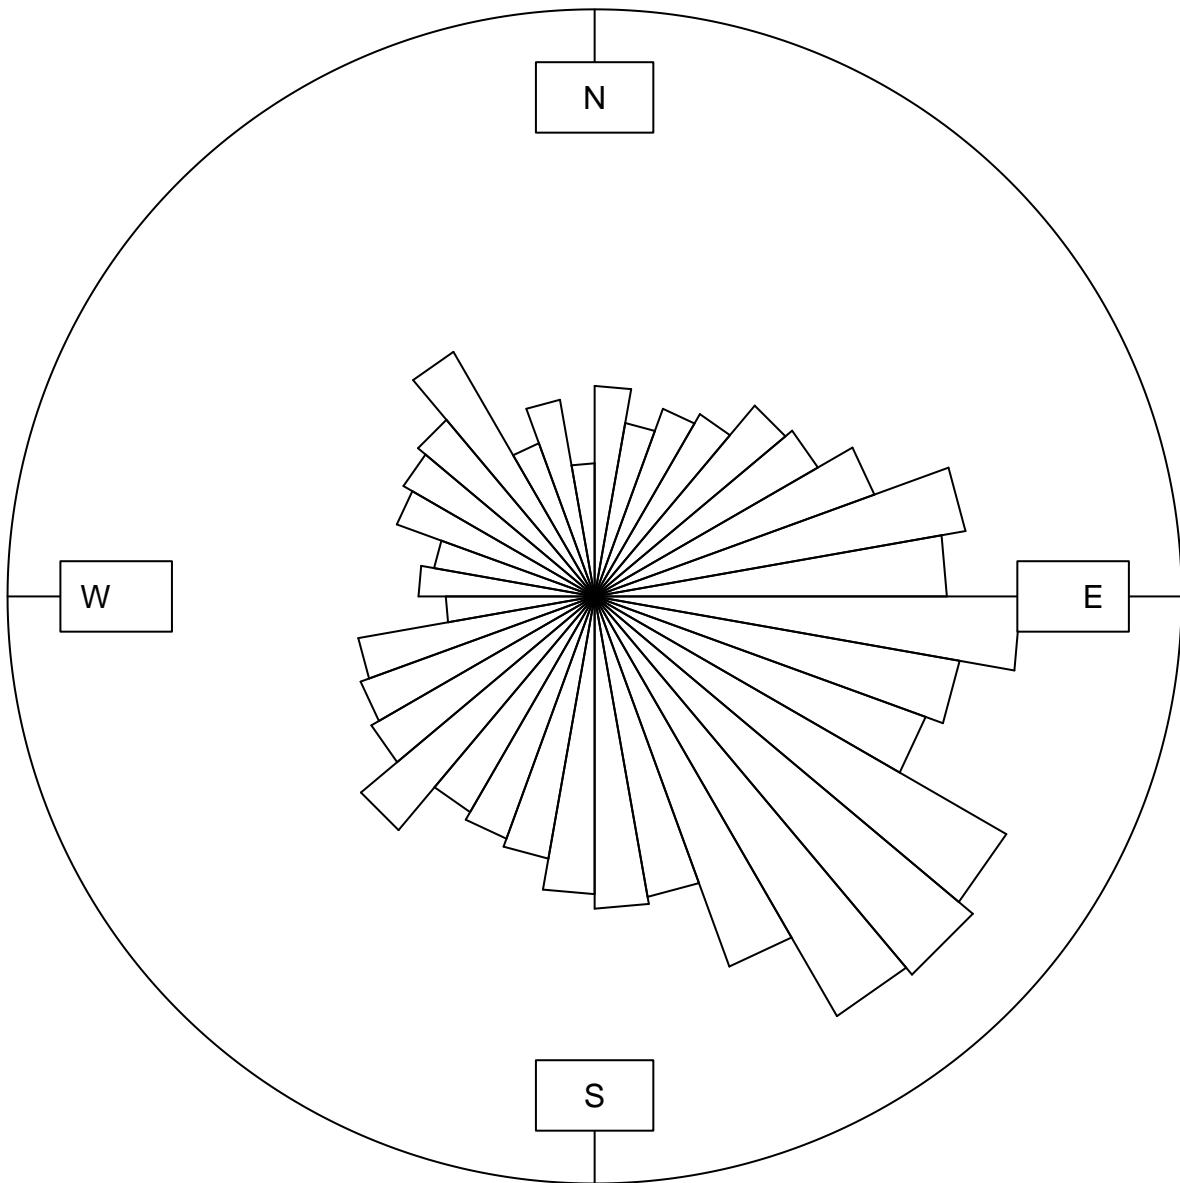

# bootstrap 984

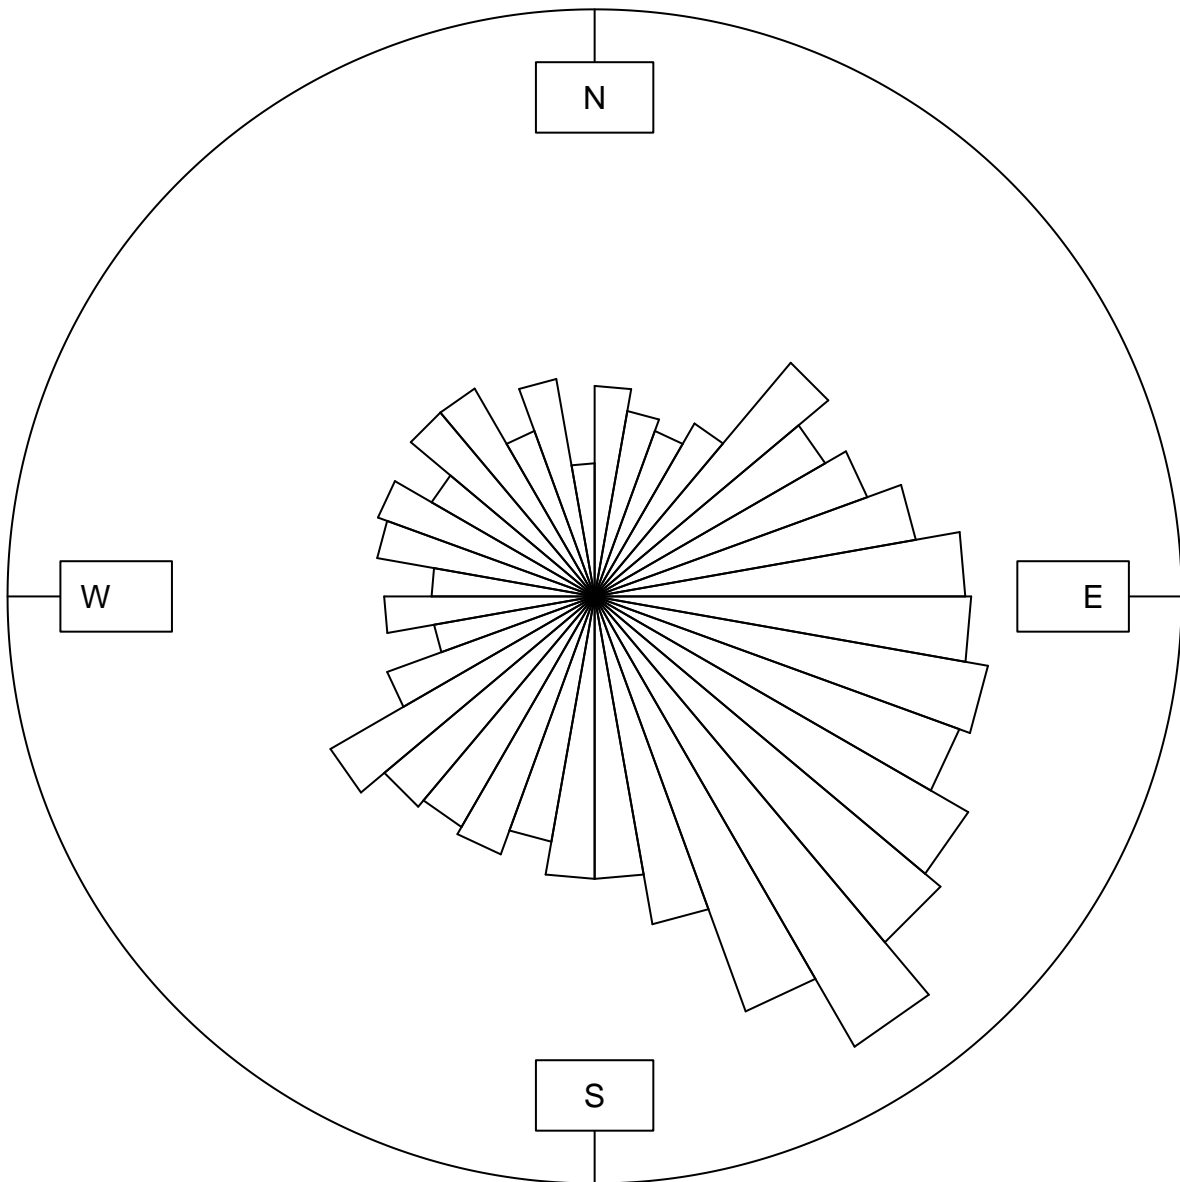



# bootstrap 985

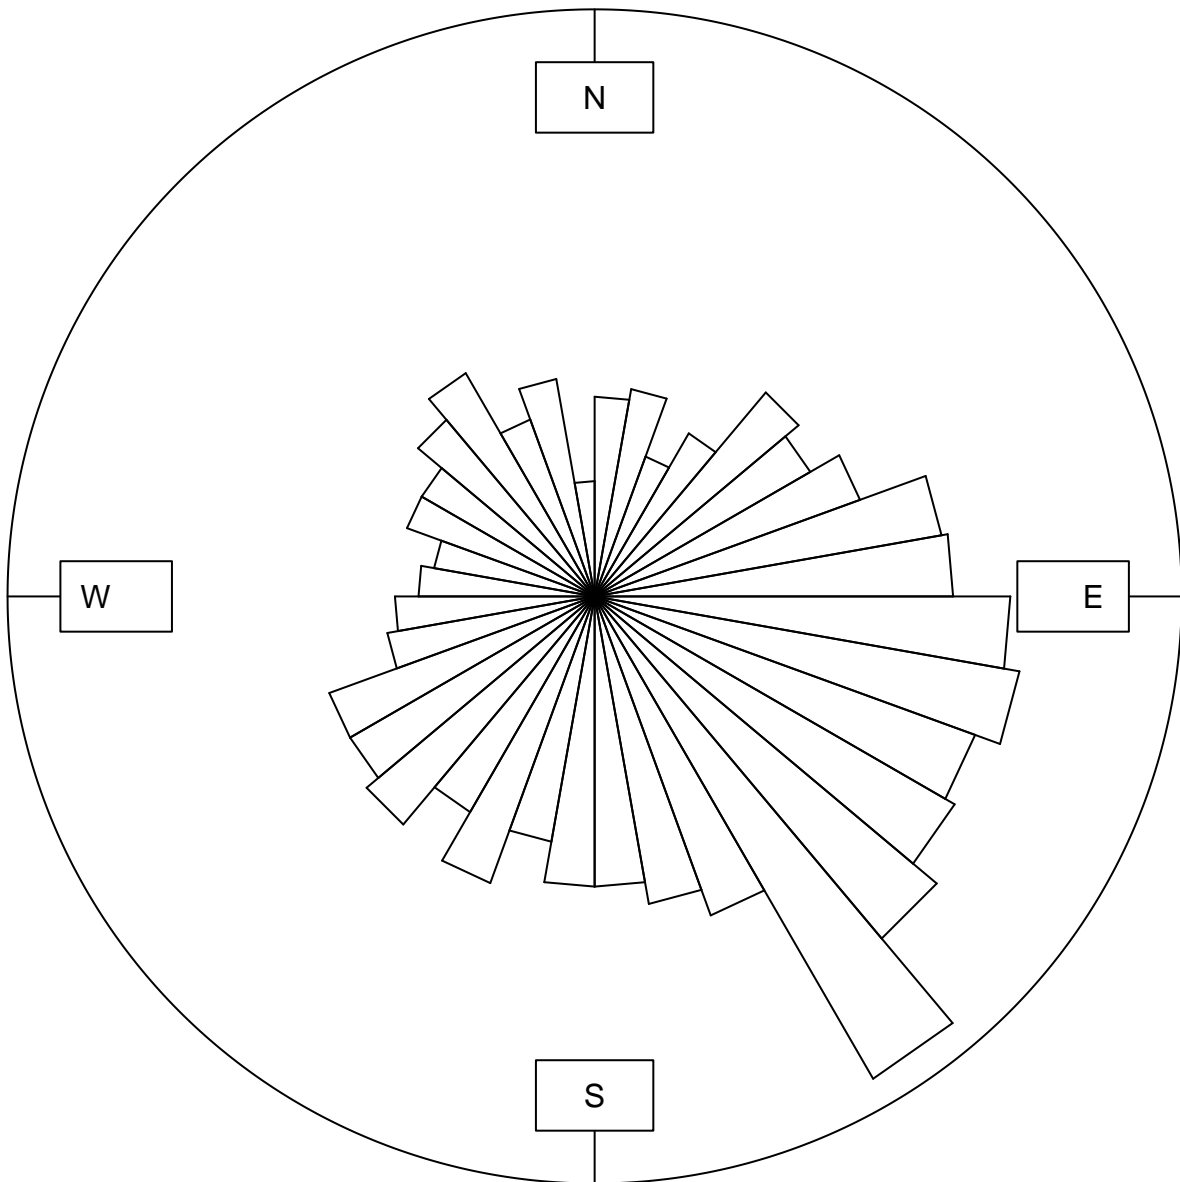

# bootstrap 986

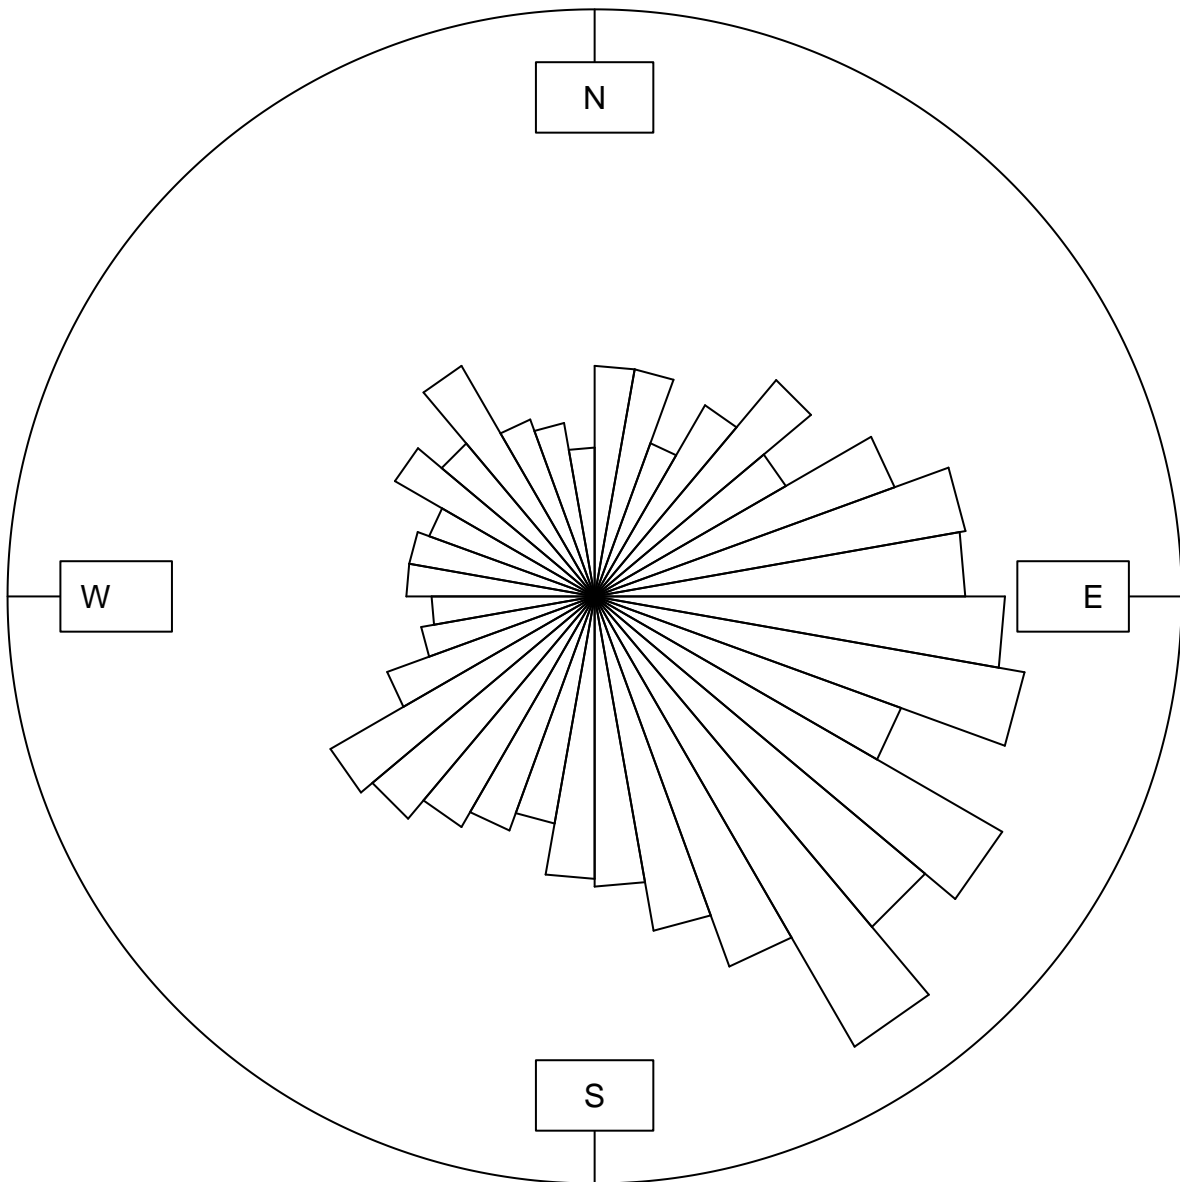

# bootstrap 987

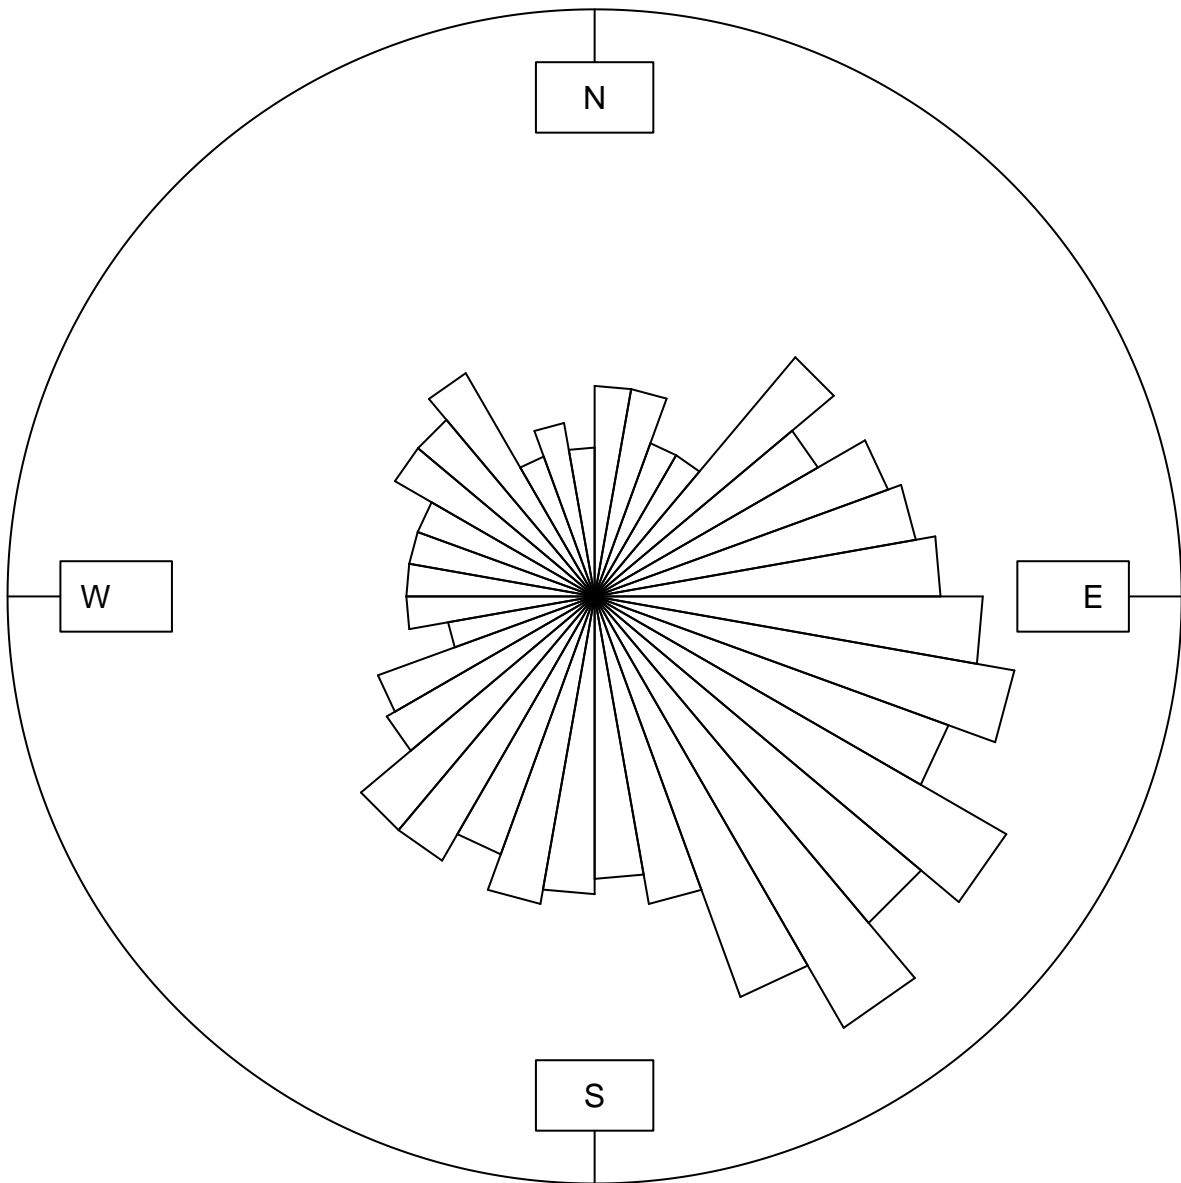

**bootstrap 988**

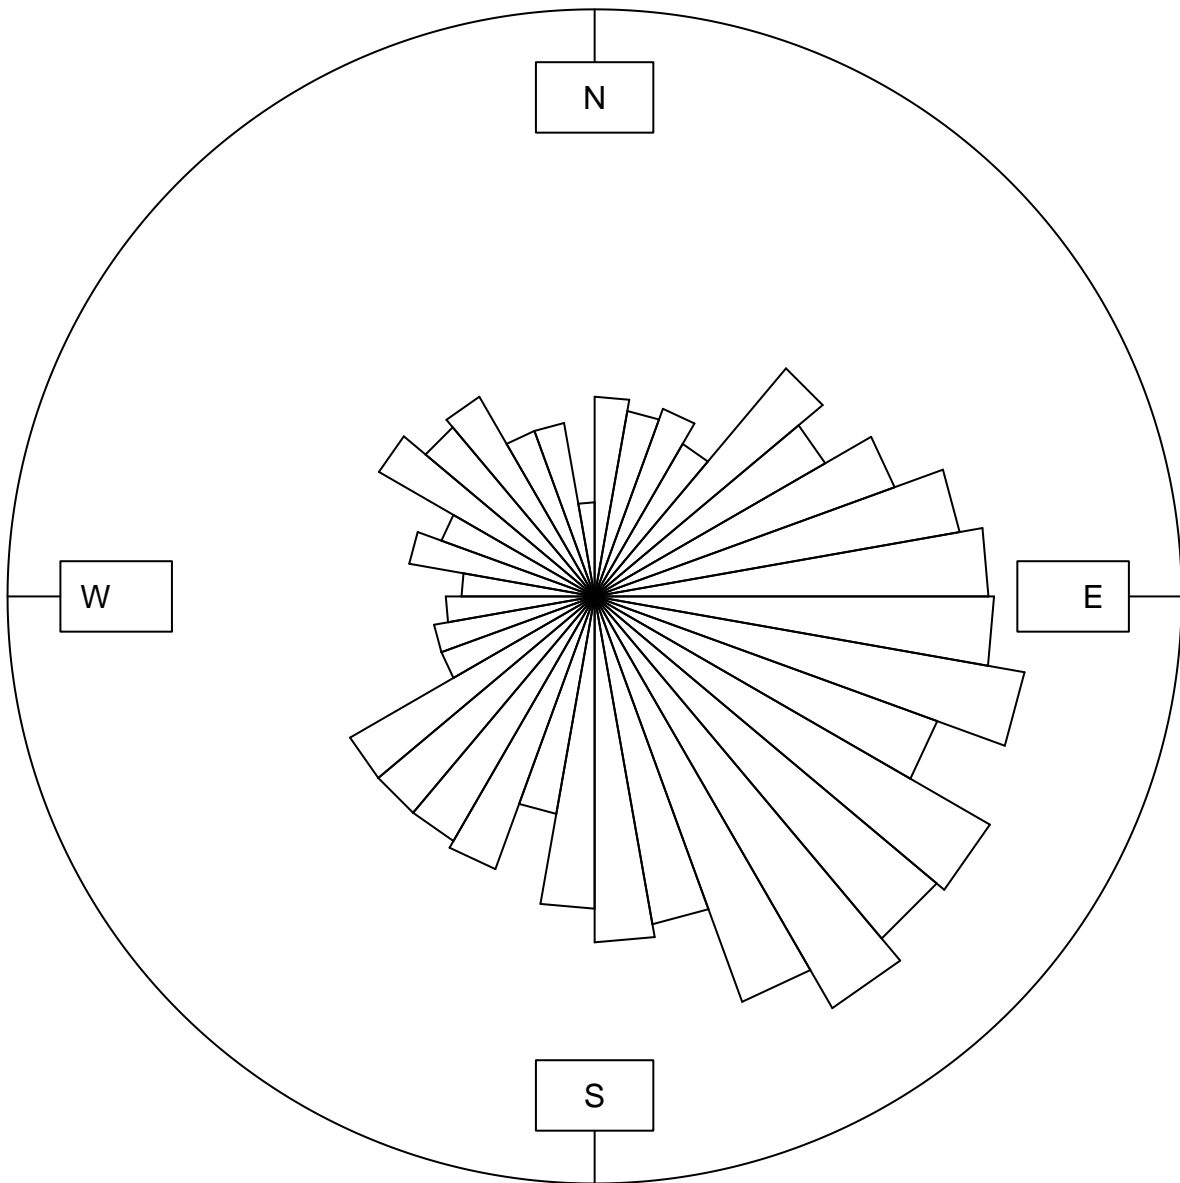

# bootstrap 989

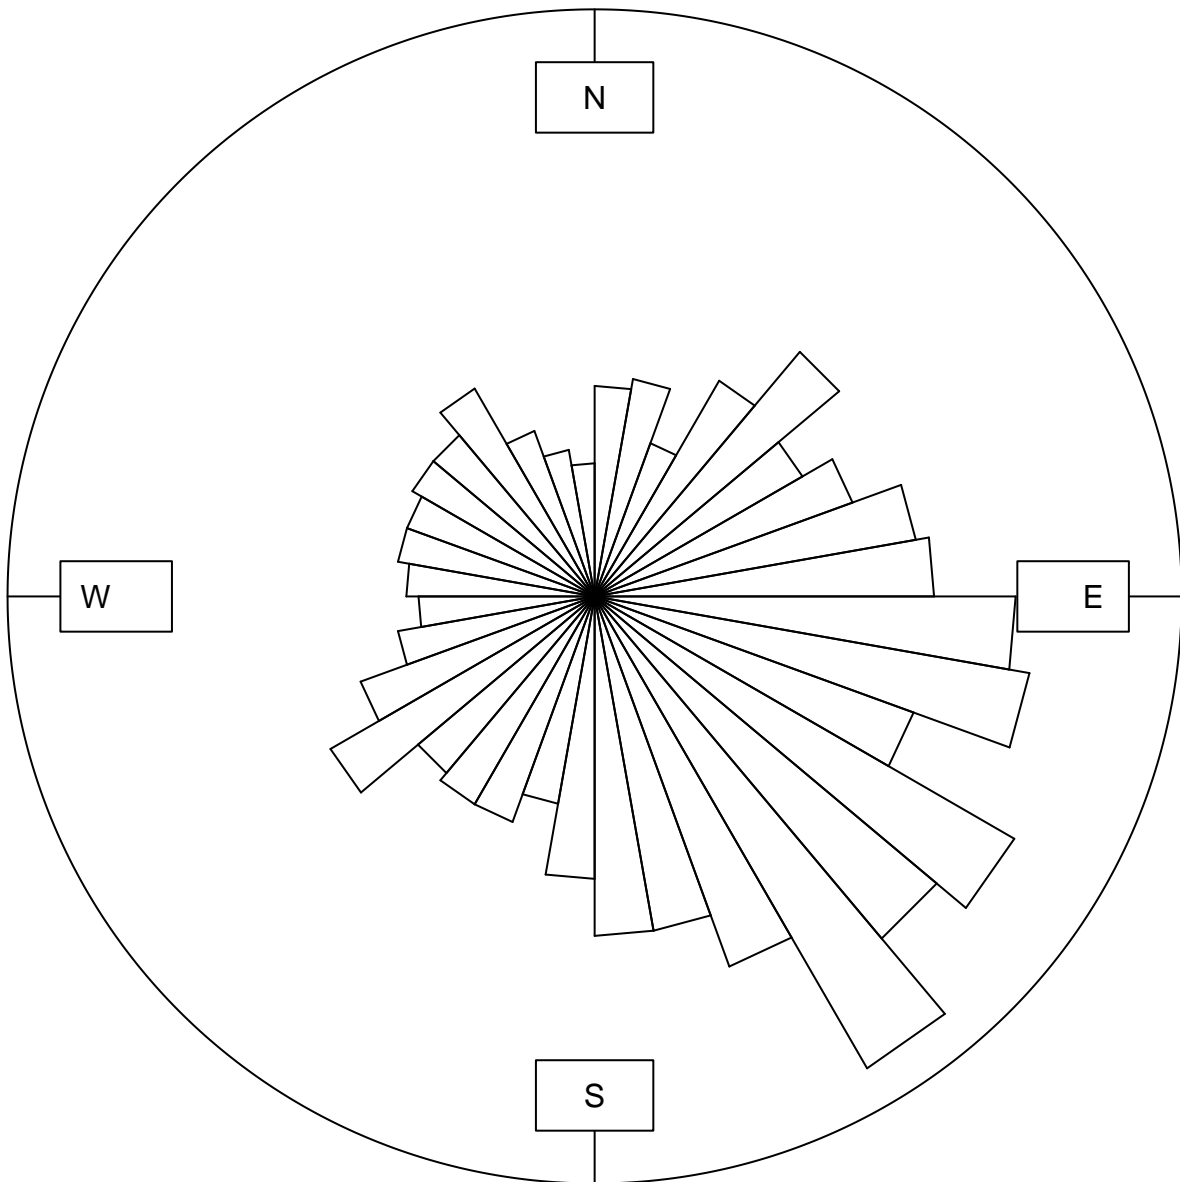

# bootstrap 990

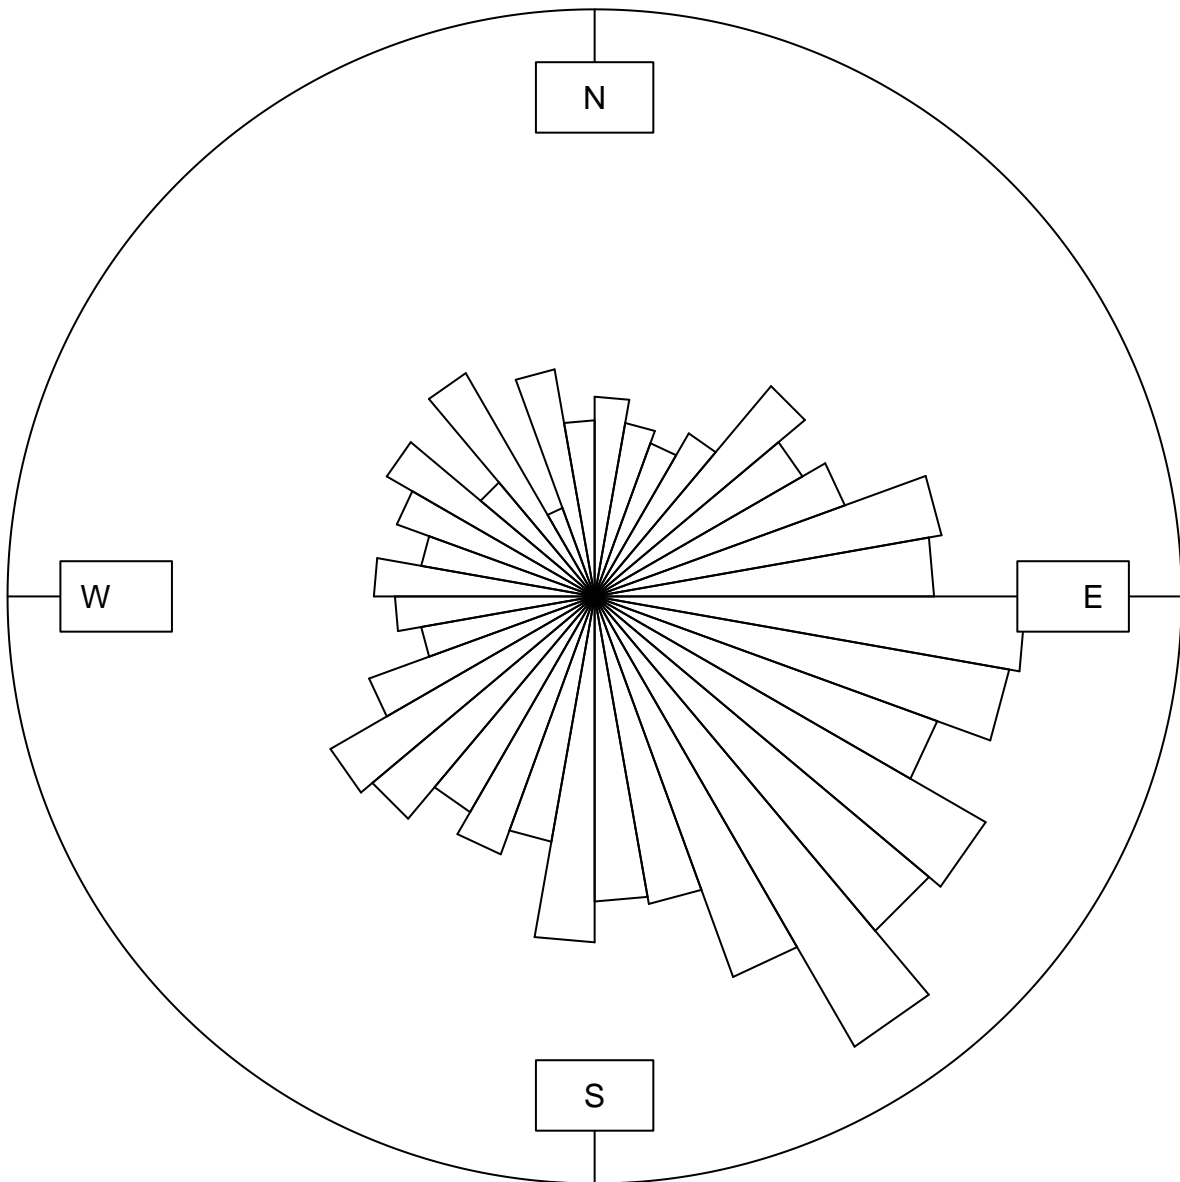

# bootstrap 991

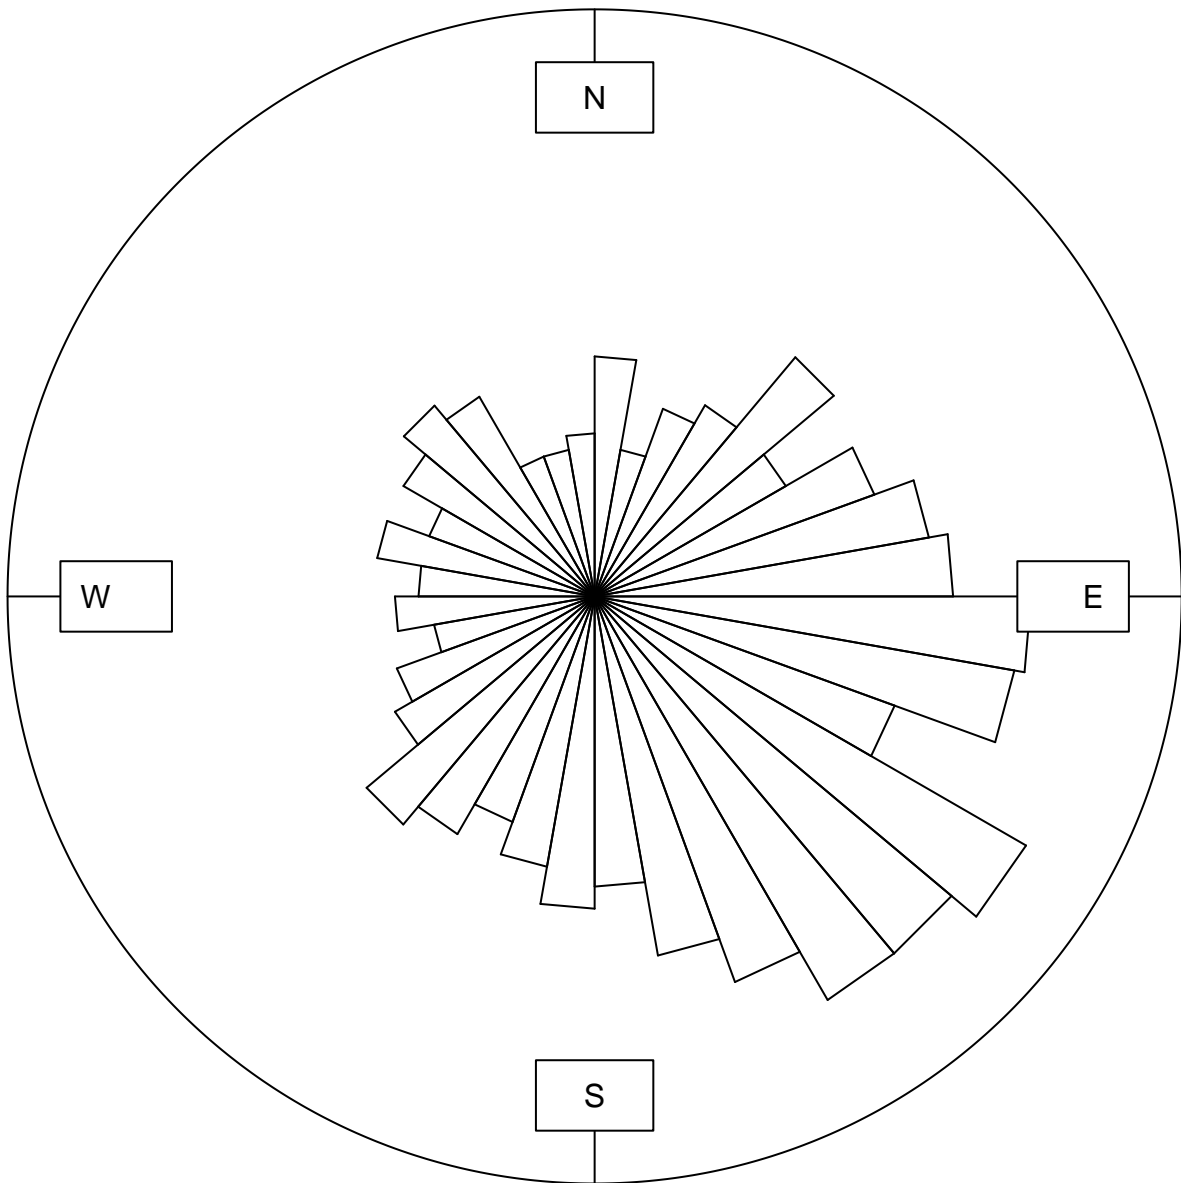

# bootstrap 992

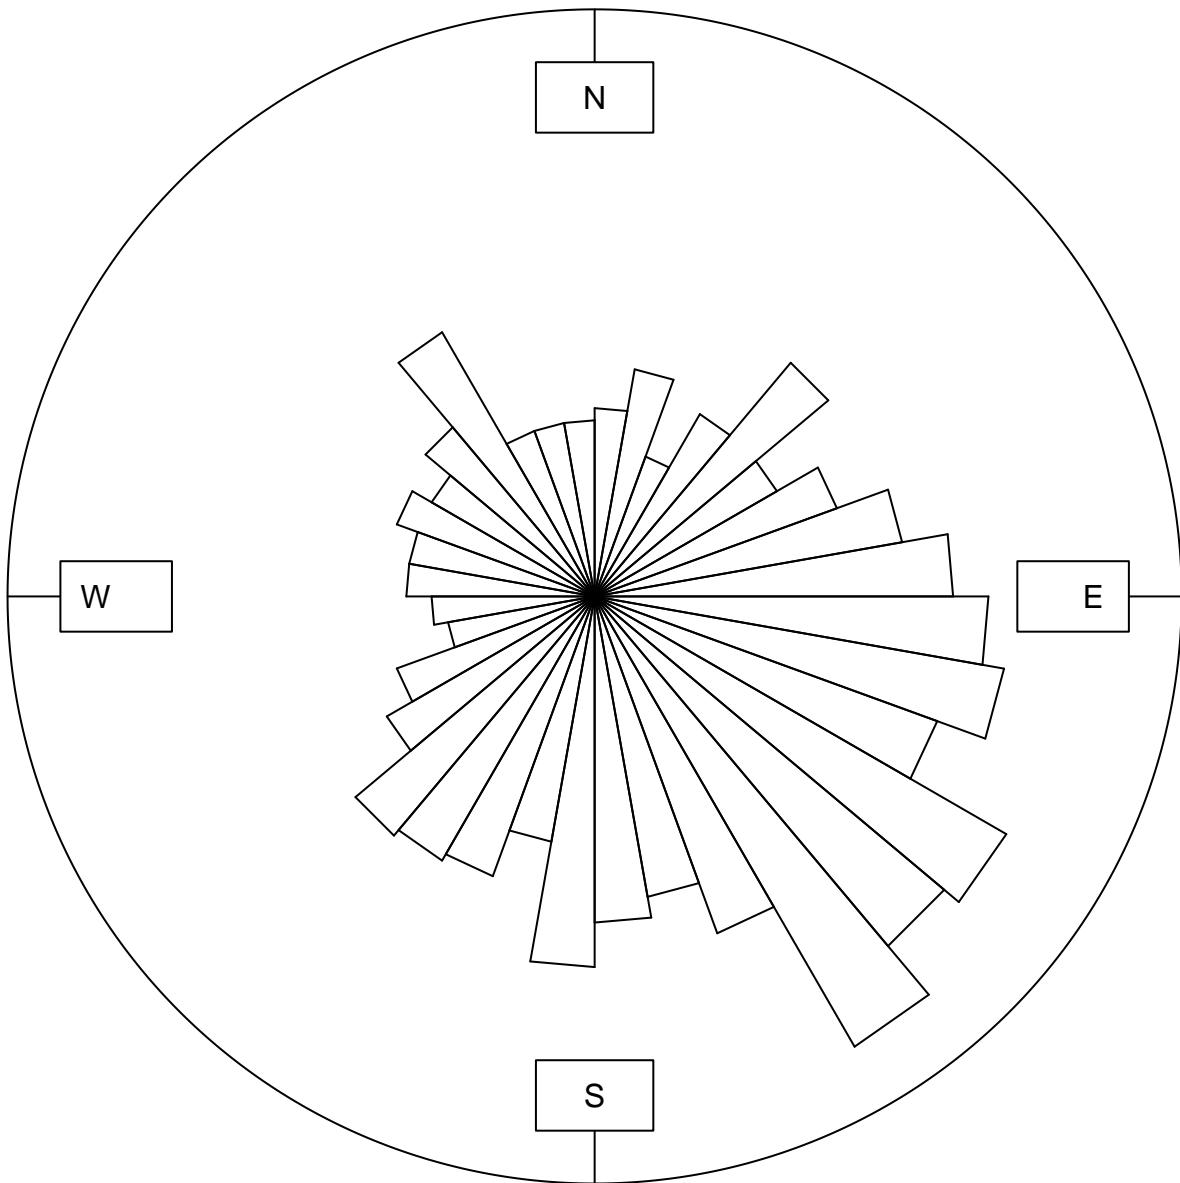



# bootstrap 993

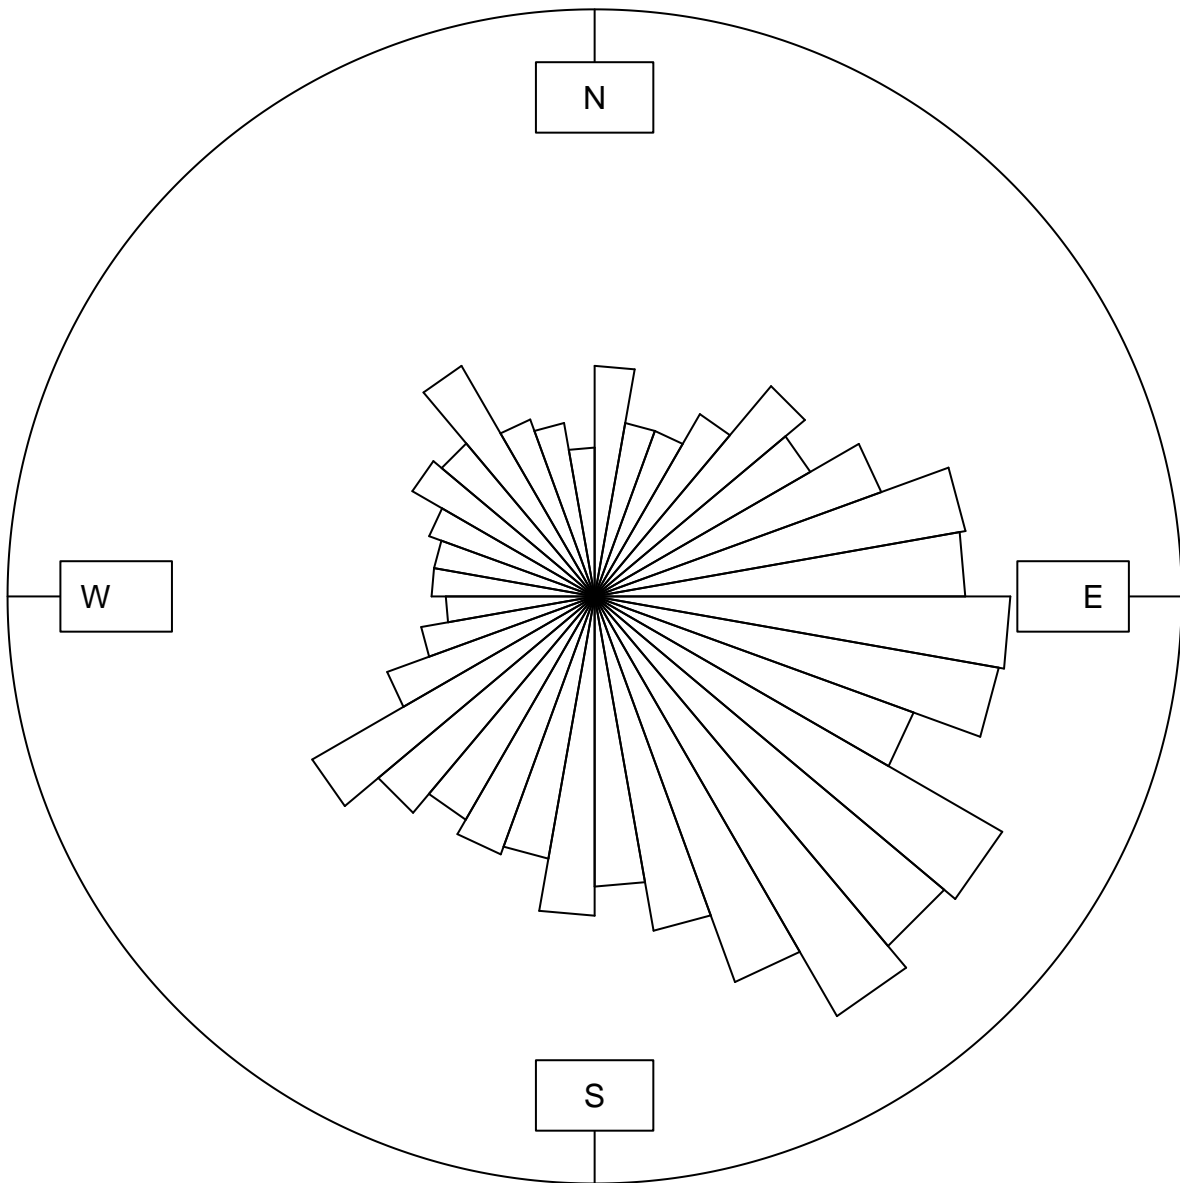

# bootstrap 994

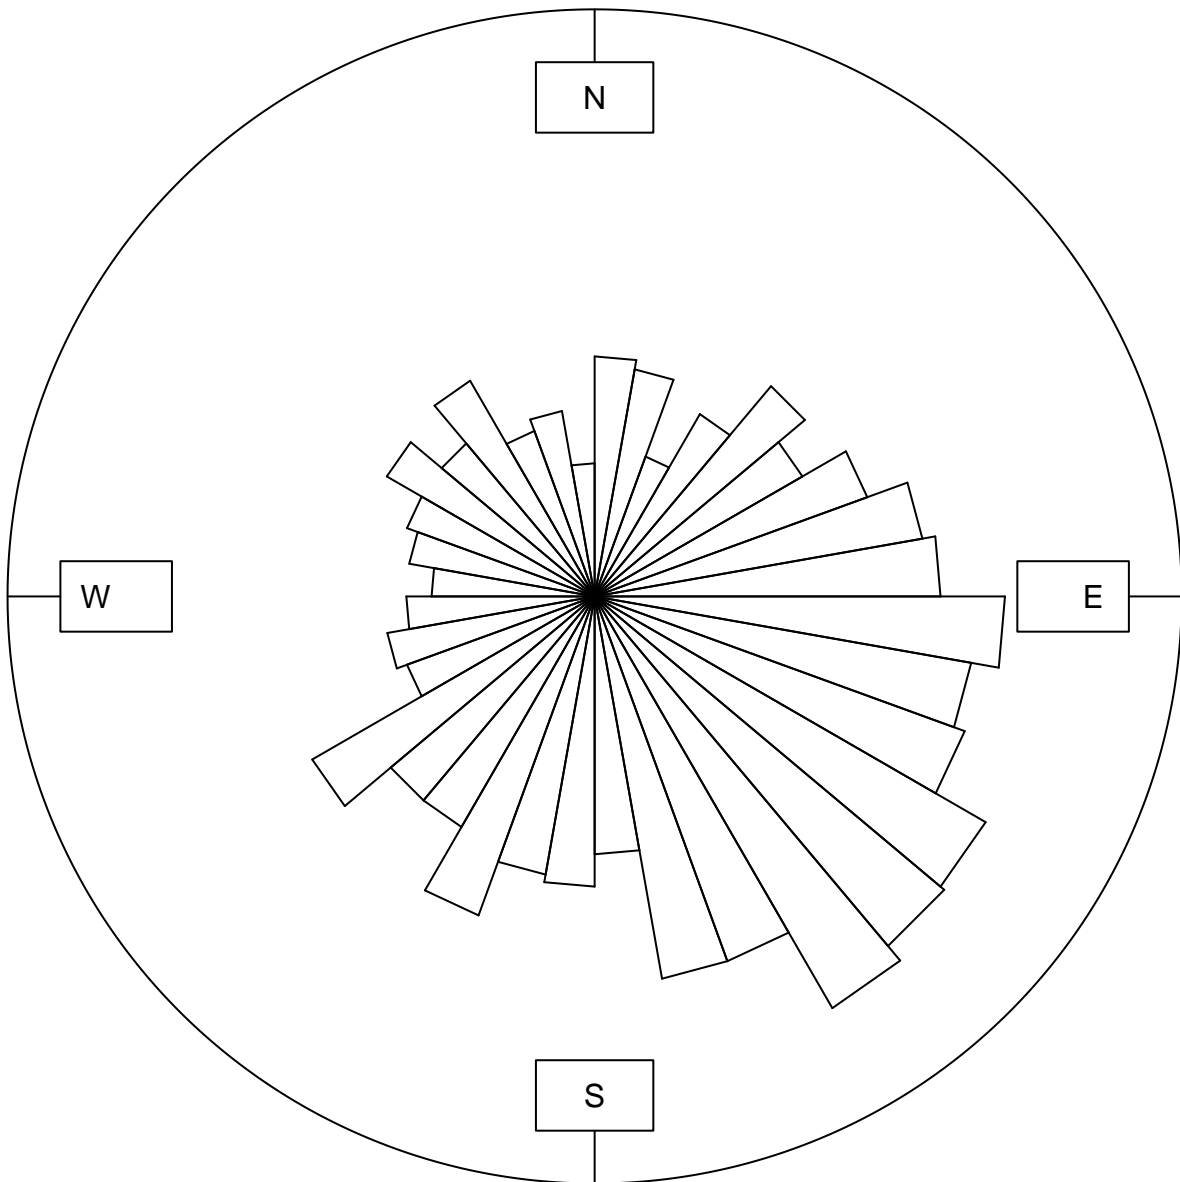

# bootstrap 995

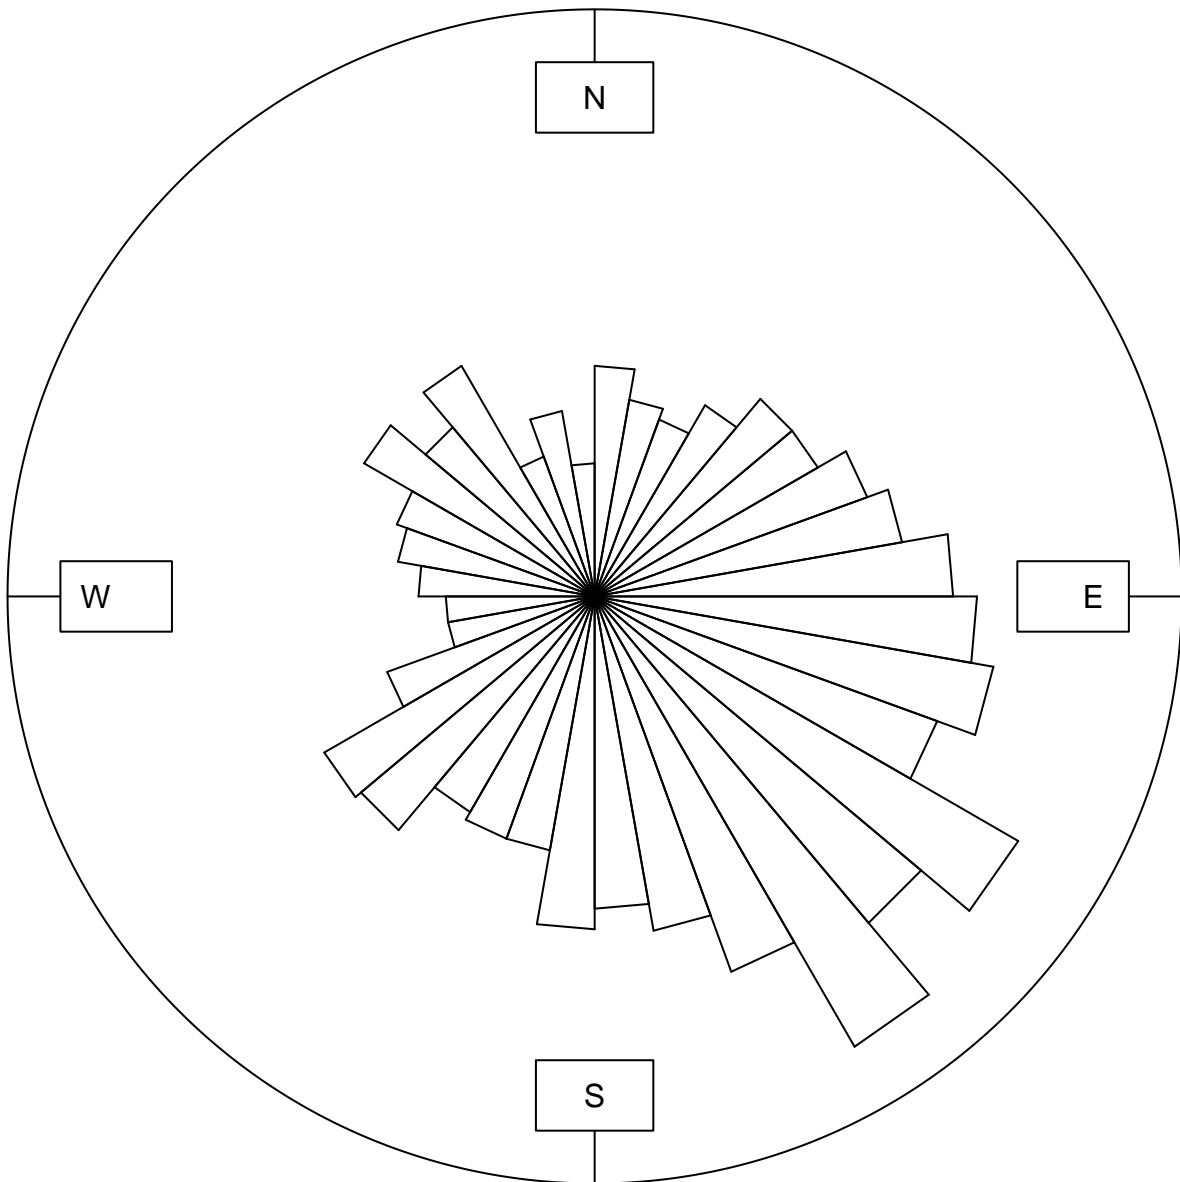

# bootstrap 996

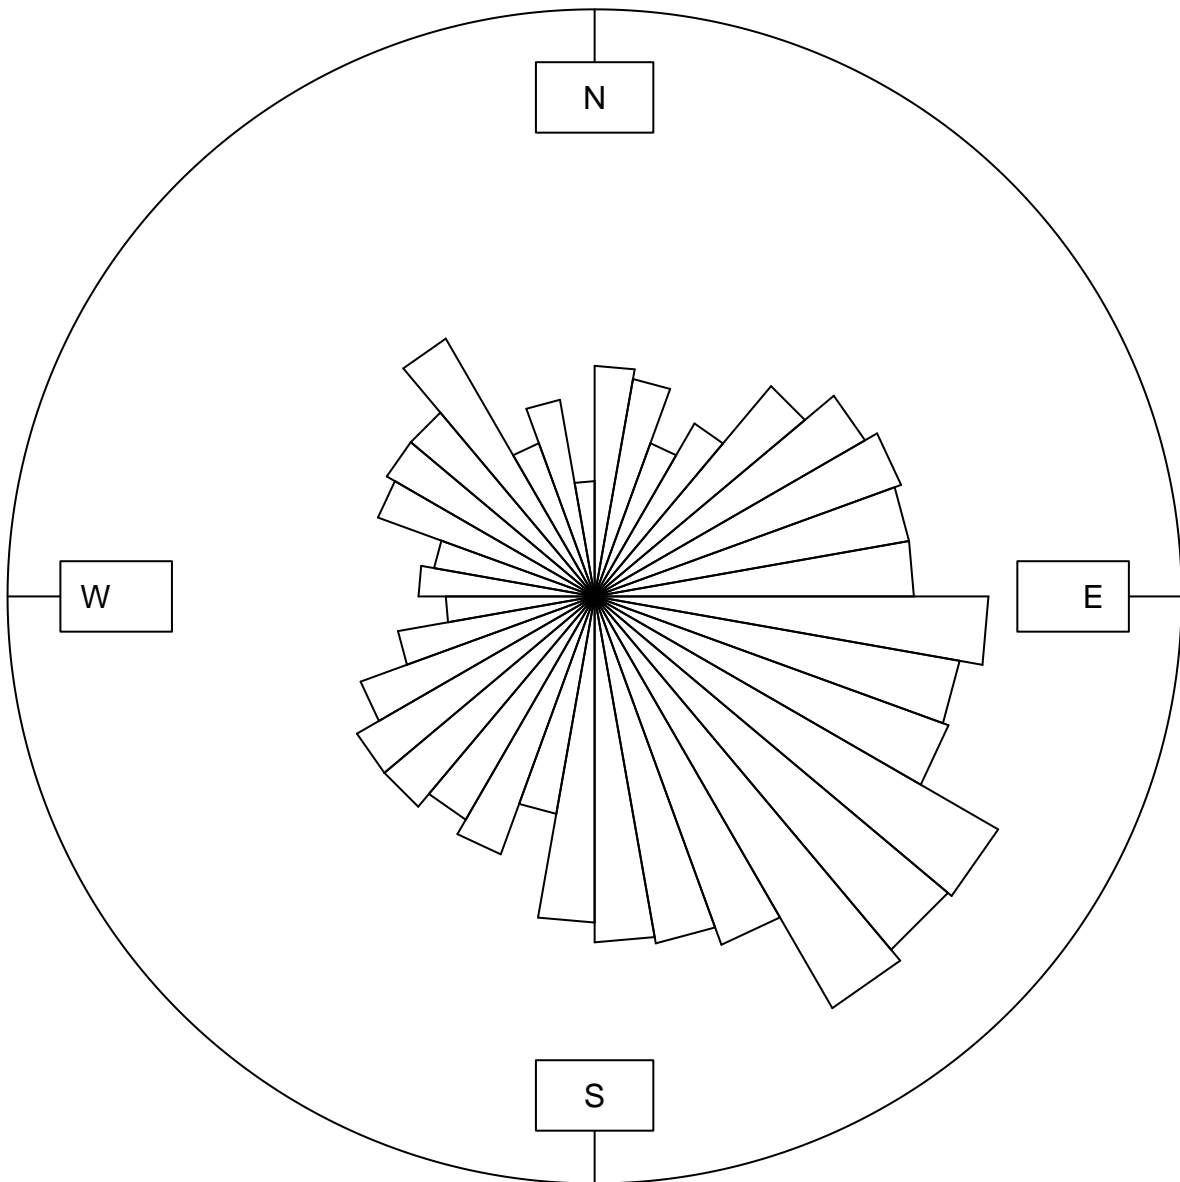

**bootstrap 997**

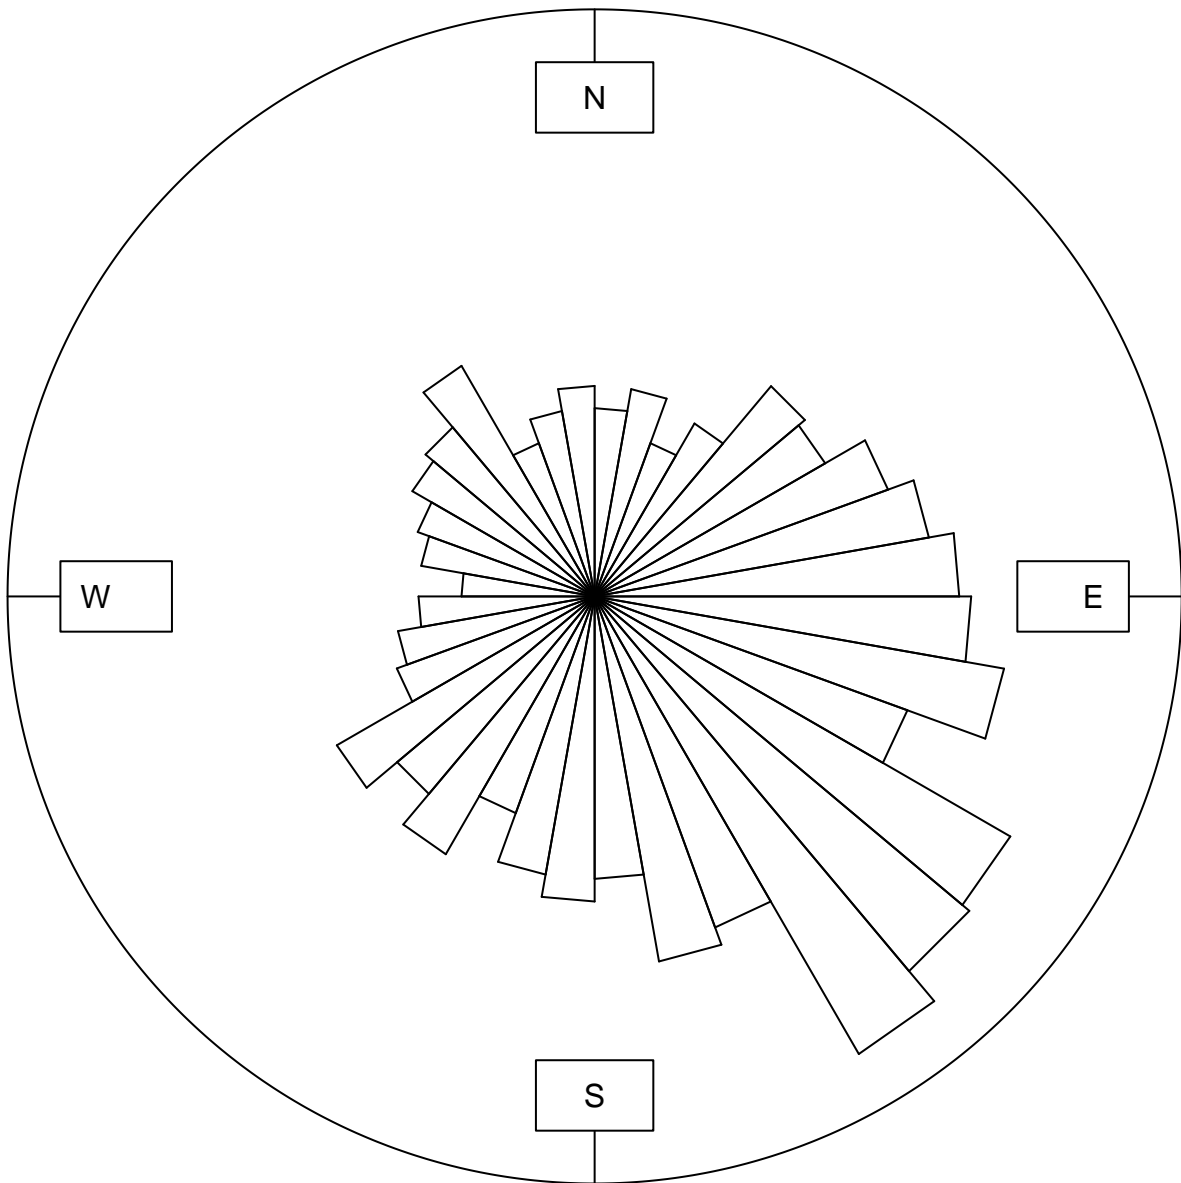

**bootstrap 998**

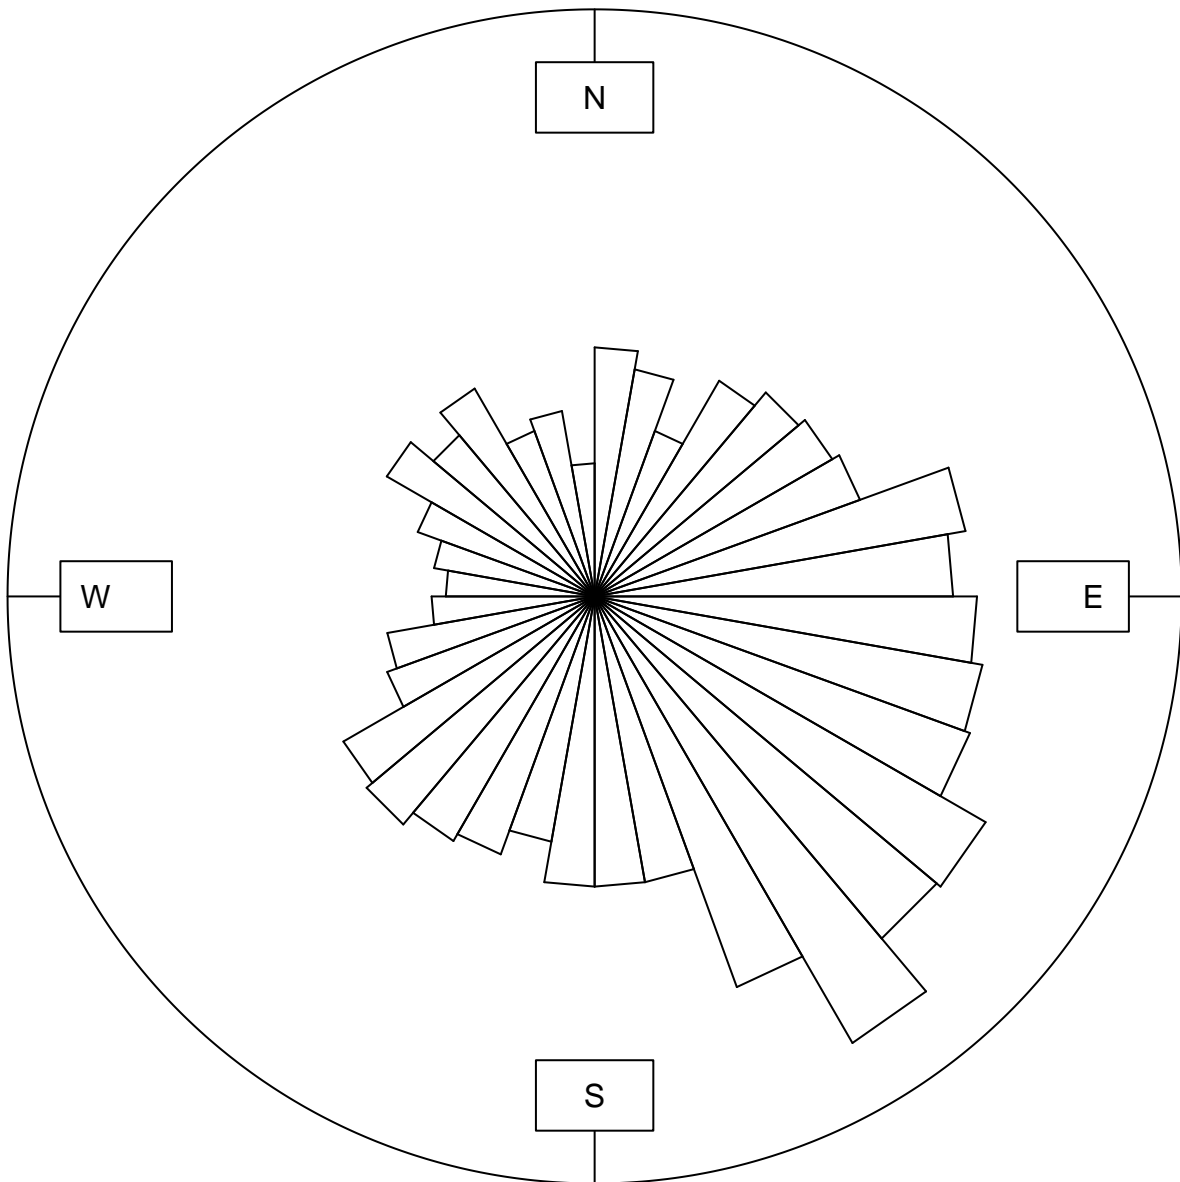

# bootstrap 999

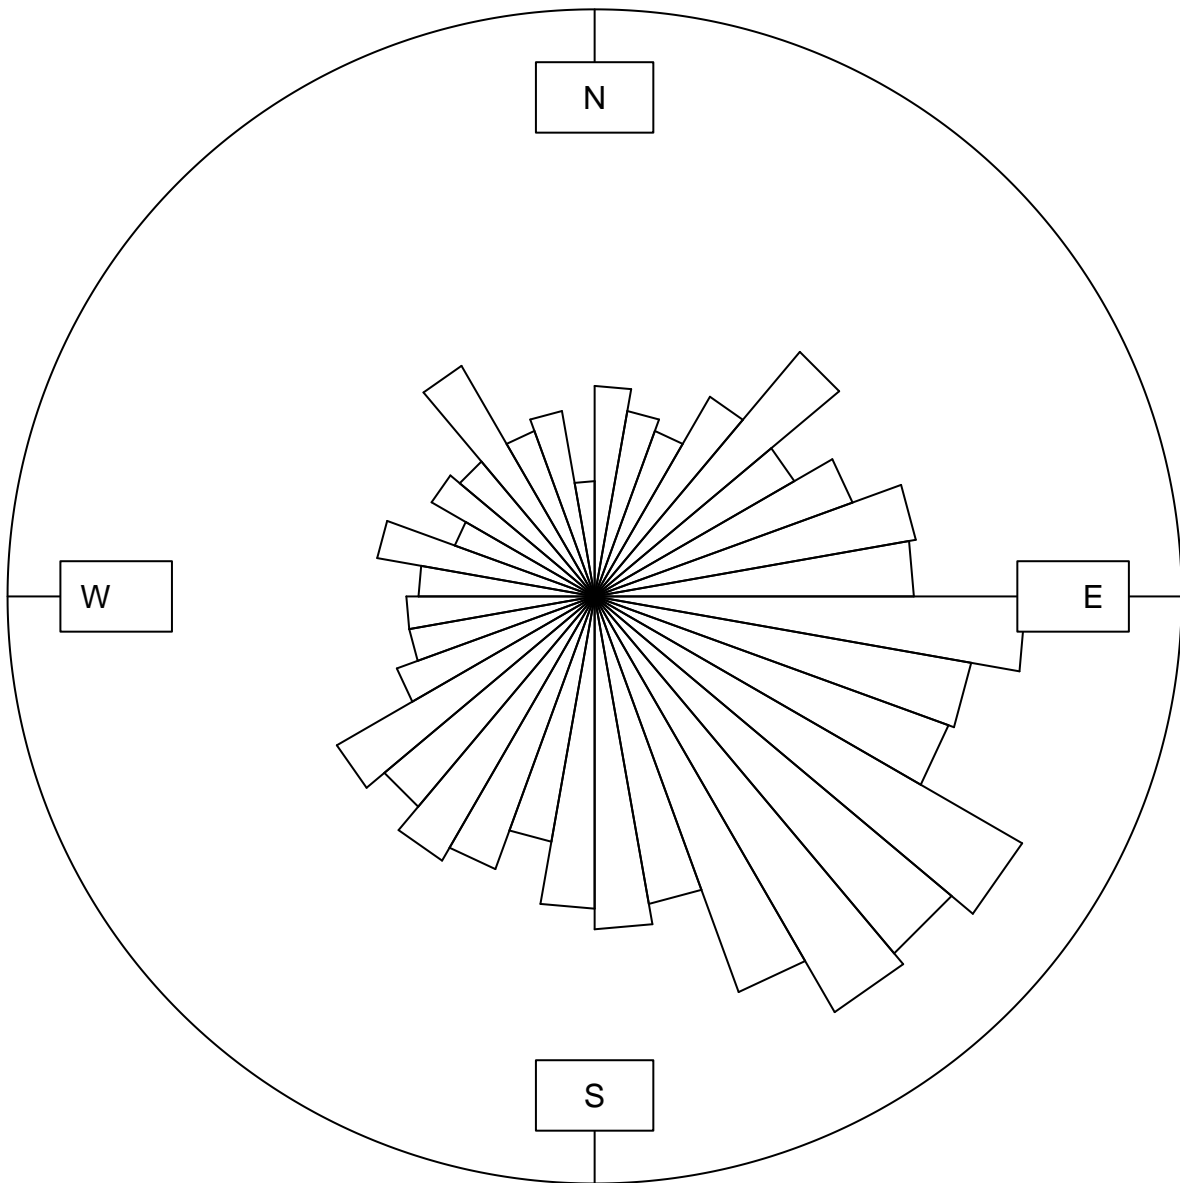

**bootstrap 1000**

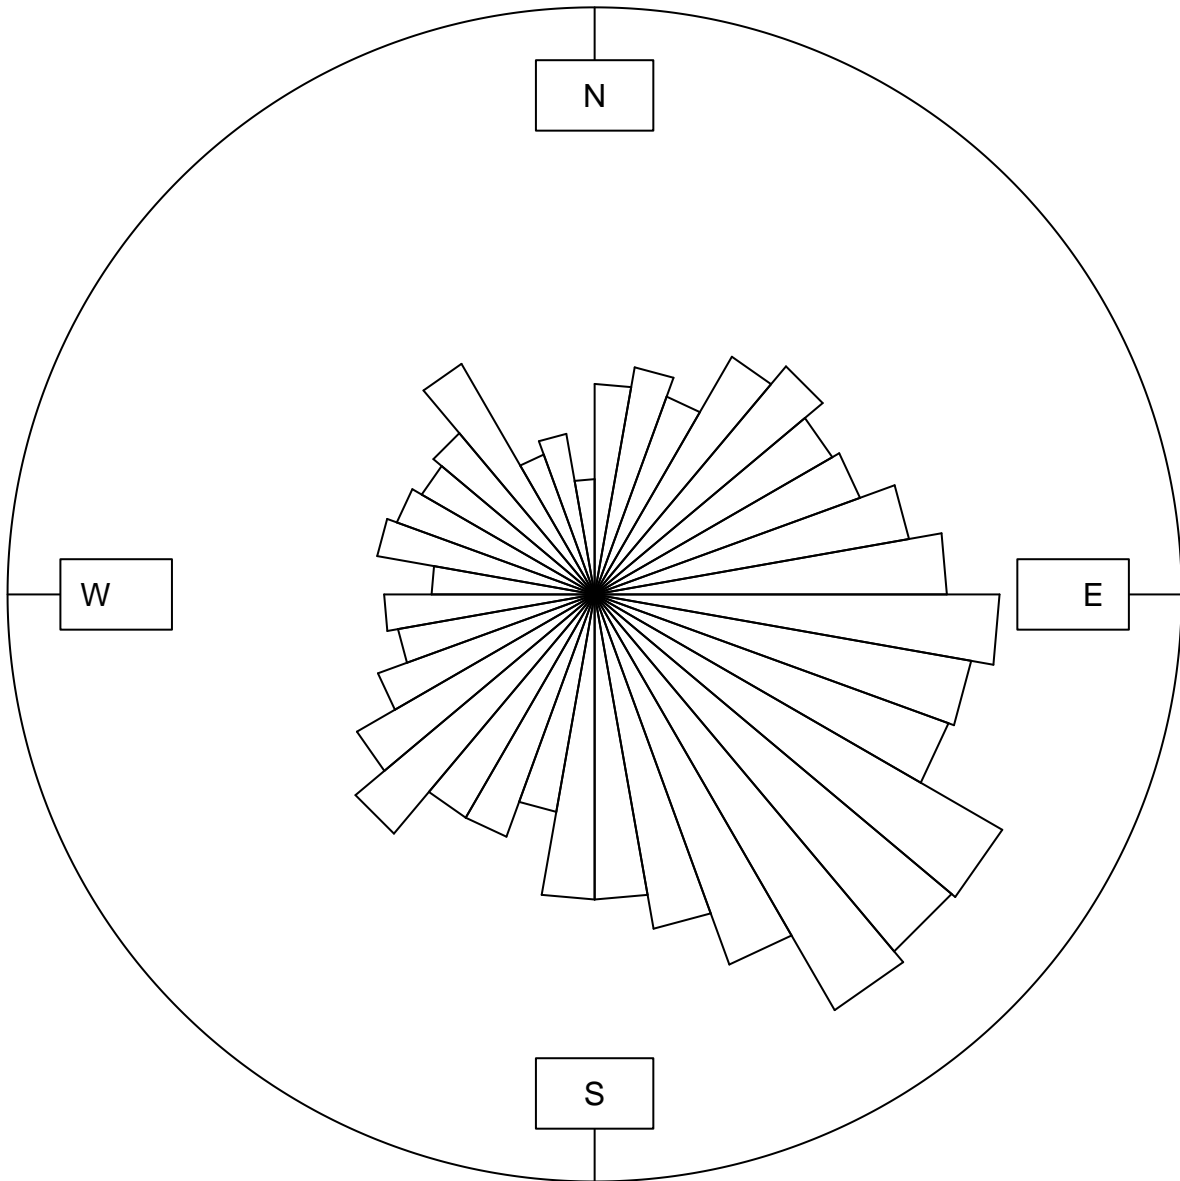

Supplement: pone.0187848.s001.pdf [file pone.0187848.s001.pdf]
