# Supplementary material for: An experimental approach in revisiting the magnetic orientation of cattle
Source: PubMed Central journal article supplement (PMC5894954; doi:10.1371/journal.pone.0187848), 2018-04-11
Supplement: pone.0187848.s002.pdf [file pone.0187848.s002.pdf]

Boxplot of orientation of cows per density on the farm (Weijers et al. 2017)

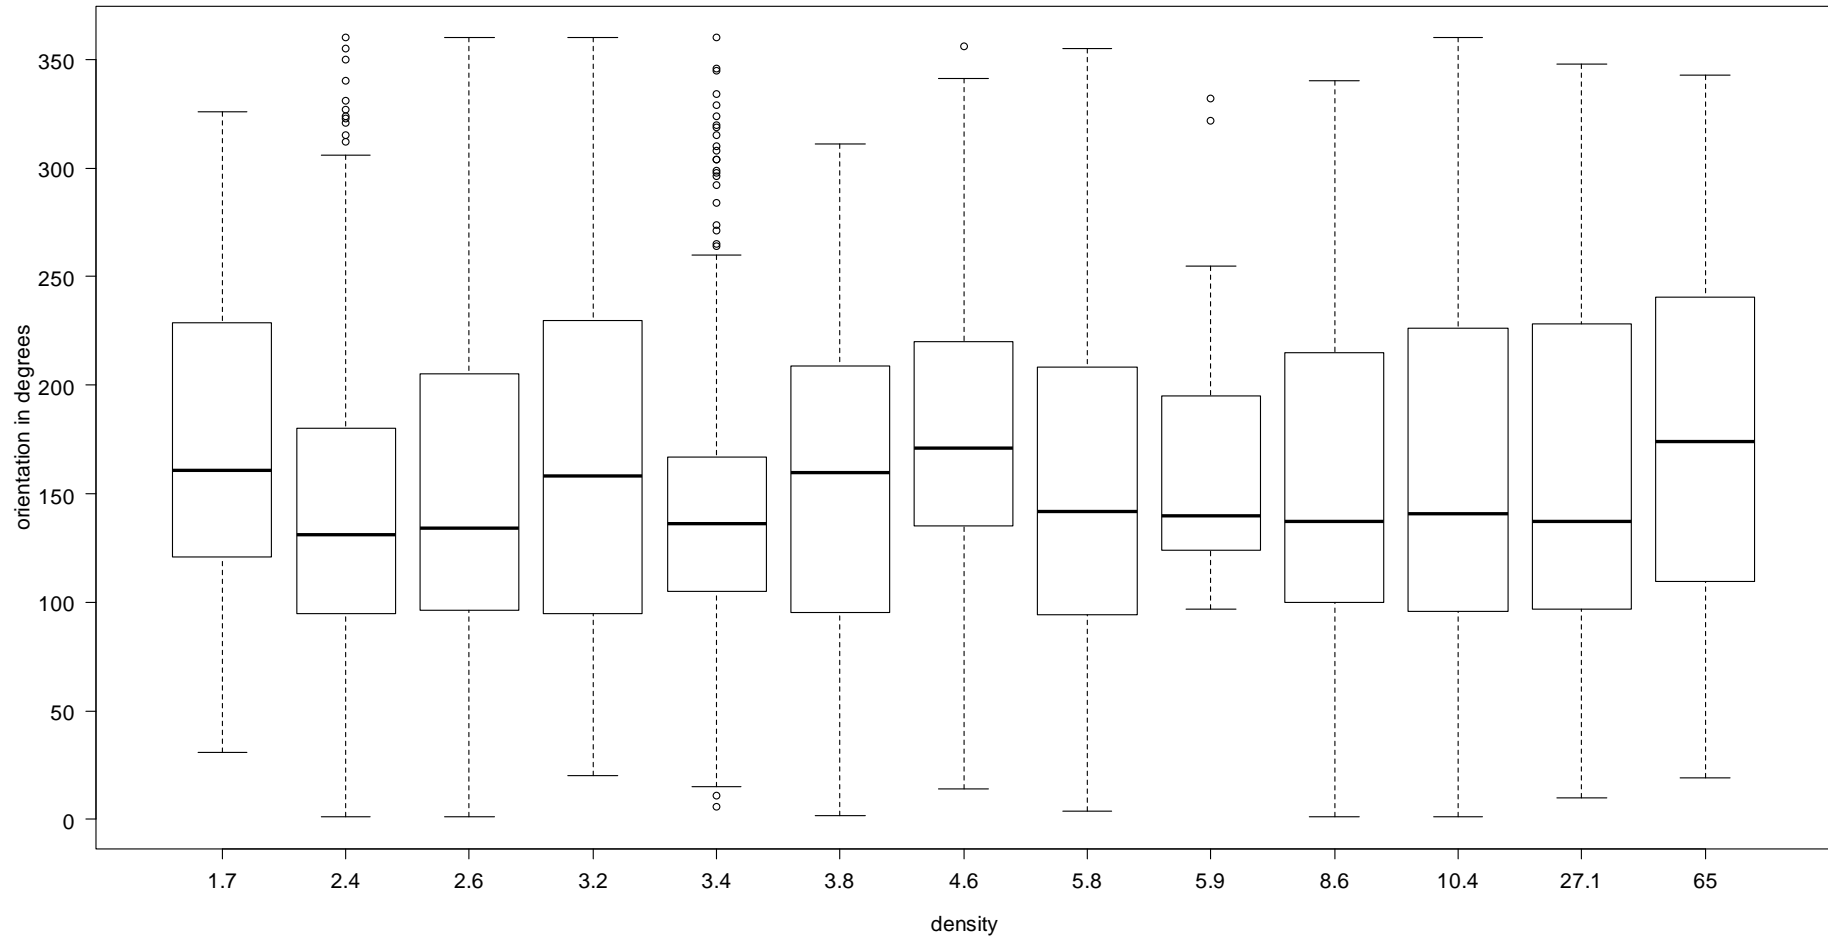

S1 Fig: The orientation of individual cows is plotted for the different densities of the cows on the farms; no relationship with density could be detected.
